# Supplementary material for: Conduction pathway for potassium through the Escherichia coli pump KdpFABC
Source: eLife. 2025 Nov 19;14:RP107397. doi: 10.7554/eLife.107397 (PMC12629597; doi:10.7554/eLife.107397)
Supplement: Figure 1—figure supplement 1—source data 1. [file elife-107397-fig1-figsupp1-data1.xlsx]

## Sheet: Suppl_fig1B
volume (mL)	absorbance (mAU)
0	-0.017
0.02	0
0.04	-0.001
0.06	-0.011
0.08	-0.006
0.1	-0.015
0.12	-0.01
0.14	-0.02
0.16	-0.025
0.18	-0.008
0.2	-0.004
0.22	-0.014
0.24	-0.013
0.26	-0.022
0.28	-0.023
0.3	-0.019
0.32	-0.025
0.34	-0.027
0.36	-0.025
0.38	-0.015
0.4	-0.017
0.42	0.02
0.44	-0.033
0.46	-0.026
0.48	-0.029
0.5	-0.029
0.52	-0.02
0.54	-0.012
0.56	-0.019
0.58	-0.017
0.6	-0.008
0.62	-0.024
0.64	-0.011
0.66	-0.021
0.68	-0.014
0.699	-0.018
0.719	-0.028
0.739	-0.033
0.759	-0.013
0.779	-0.034
0.799	-0.029
0.819	-0.033
0.839	-0.043
0.859	-0.034
0.879	-0.027
0.899	-0.044
0.919	-0.037
0.939	-0.033
0.959	-0.033
0.979	-0.044
0.999	-0.045
1.019	-0.051
1.039	-0.043
1.059	-0.046
1.079	-0.059
1.099	-0.054
1.119	-0.057
1.139	-0.055
1.159	-0.059
1.179	-0.05
1.199	-0.057
1.219	-0.066
1.239	-0.06
1.259	-0.06
1.279	-0.076
1.299	-0.076
1.319	-0.072
1.339	-0.068
1.359	-0.084
1.379	-0.081
1.399	-0.085
1.419	-0.086
1.439	-0.09
1.459	-0.087
1.479	-0.091
1.499	-0.096
1.519	-0.106
1.539	-0.105
1.559	-0.102
1.579	-0.108
1.599	-0.101
1.619	-0.107
1.639	-0.108
1.659	-0.105
1.679	-0.113
1.699	-0.11
1.719	-0.113
1.739	-0.117
1.759	-0.11
1.779	-0.107
1.799	-0.114
1.819	-0.114
1.839	-0.111
1.859	-0.115
1.879	-0.114
1.899	-0.113
1.919	-0.105
1.939	-0.106
1.959	-0.111
1.979	-0.104
1.999	-0.096
2.019	-0.107
2.039	-0.106
2.059	-0.097
2.079	-0.094
2.098	-0.09
2.118	-0.088
2.138	-0.082
2.158	-0.087
2.178	-0.075
2.198	-0.074
2.218	-0.069
2.238	-0.062
2.258	-0.062
2.278	-0.047
2.298	-0.042
2.318	-0.031
2.338	-0.017
2.358	0.013
2.378	0.019
2.398	0.051
2.418	0.071
2.438	0.09
2.458	0.125
2.478	0.156
2.498	0.194
2.518	0.224
2.538	0.26
2.558	0.289
2.578	0.311
2.598	0.329
2.618	0.331
2.638	0.342
2.658	0.347
2.678	0.346
2.698	0.329
2.718	0.32
2.738	0.302
2.758	0.302
2.778	0.284
2.798	0.267
2.818	0.242
2.838	0.219
2.858	0.203
2.878	0.182
2.898	0.158
2.918	0.145
2.938	0.126
2.958	0.112
2.978	0.088
2.998	0.085
3.018	0.059
3.038	0.043
3.058	0.036
3.078	0.024
3.098	0.02
3.118	0.01
3.138	-0.012
3.158	-0.009
3.178	-0.026
3.198	-0.018
3.218	-0.042
3.238	-0.038
3.258	-0.046
3.278	-0.056
3.298	-0.046
3.318	-0.064
3.338	-0.064
3.358	-0.071
3.378	-0.073
3.398	-0.084
3.418	-0.086
3.438	-0.091
3.458	-0.096
3.478	-0.104
3.497	-0.102
3.517	-0.103
3.537	-0.109
3.557	-0.116
3.577	-0.125
3.597	-0.121
3.617	-0.128
3.637	-0.122
3.657	-0.128
3.677	-0.14
3.697	-0.13
3.717	-0.135
3.737	-0.137
3.757	-0.135
3.777	-0.137
3.797	-0.146
3.817	-0.148
3.837	-0.142
3.857	-0.147
3.877	-0.151
3.897	-0.155
3.917	-0.149
3.937	-0.154
3.957	-0.151
3.977	-0.152
3.997	-0.15
4.017	-0.154
4.037	-0.166
4.057	-0.161
4.077	-0.152
4.097	-0.17
4.117	-0.161
4.137	-0.164
4.157	-0.165
4.177	-0.168
4.197	-0.172
4.217	-0.17
4.237	-0.166
4.257	-0.171
4.277	-0.171
4.297	-0.166
4.317	-0.17
4.337	-0.165
4.357	-0.17
4.377	-0.171
4.397	-0.17
4.417	-0.161
4.437	-0.161
4.457	-0.16
4.477	-0.165
4.497	-0.169
4.517	-0.153
4.537	-0.16
4.557	-0.151
4.577	-0.153
4.597	-0.149
4.617	-0.156
4.637	-0.156
4.657	-0.149
4.677	-0.153
4.697	-0.158
4.717	-0.152
4.737	-0.15
4.757	-0.147
4.777	-0.138
4.797	-0.136
4.817	-0.147
4.837	-0.145
4.857	-0.145
4.877	-0.148
4.896	-0.143
4.916	-0.139
4.936	-0.134
4.956	-0.128
4.976	-0.134
4.996	-0.134
5.016	-0.136
5.036	-0.137
5.056	-0.129
5.076	-0.129
5.096	-0.133
5.116	-0.118
5.136	-0.126
5.156	-0.13
5.176	-0.132
5.196	-0.123
5.216	-0.123
5.236	-0.124
5.256	-0.129
5.276	-0.131
5.296	-0.128
5.316	-0.129
5.336	-0.127
5.356	-0.128
5.376	-0.124
5.396	-0.122
5.416	-0.121
5.436	-0.119
5.456	-0.131
5.476	-0.124
5.496	-0.124
5.516	-0.135
5.536	-0.126
5.556	-0.132
5.576	-0.133
5.596	-0.139
5.616	-0.14
5.636	-0.143
5.656	-0.147
5.676	-0.156
5.696	-0.155
5.716	-0.165
5.736	-0.168
5.756	-0.171
5.776	-0.173
5.796	-0.179
5.816	-0.191
5.836	-0.197
5.856	-0.199
5.876	-0.213
5.896	-0.216
5.916	-0.22
5.936	-0.223
5.956	-0.228
5.976	-0.225
5.996	-0.241
6.016	-0.24
6.036	-0.242
6.056	-0.255
6.076	-0.253
6.096	-0.263
6.116	-0.258
6.136	-0.264
6.156	-0.265
6.176	-0.27
6.196	-0.266
6.216	-0.274
6.236	-0.28
6.256	-0.285
6.276	-0.285
6.295	-0.29
6.315	-0.294
6.335	-0.296
6.355	-0.299
6.375	-0.304
6.395	-0.301
6.415	-0.301
6.435	-0.298
6.455	-0.308
6.475	-0.299
6.495	-0.301
6.515	-0.315
6.535	-0.305
6.555	-0.3
6.575	-0.308
6.595	-0.307
6.615	-0.303
6.635	-0.299
6.655	-0.305
6.675	-0.308
6.695	-0.302
6.715	-0.307
6.735	-0.308
6.755	-0.301
6.775	-0.299
6.795	-0.297
6.815	-0.301
6.835	-0.299
6.855	-0.303
6.875	-0.304
6.895	-0.297
6.915	-0.303
6.935	-0.301
6.955	-0.302
6.975	-0.297
6.995	-0.3
7.015	-0.298
7.035	-0.296
7.055	-0.299
7.075	-0.298
7.095	-0.29
7.115	-0.293
7.135	-0.305
7.155	-0.298
7.175	-0.297
7.195	-0.297
7.215	-0.3
7.235	-0.297
7.255	-0.303
7.275	-0.295
7.295	-0.305
7.315	-0.304
7.335	-0.304
7.355	-0.303
7.375	-0.301
7.395	-0.296
7.415	-0.305
7.435	-0.276
7.455	-0.256
7.475	-0.246
7.495	-0.26
7.515	-0.257
7.535	-0.263
7.555	-0.275
7.575	-0.277
7.595	-0.274
7.615	-0.278
7.635	-0.285
7.655	-0.288
7.675	-0.287
7.694	-0.288
7.714	-0.298
7.734	-0.299
7.754	-0.293
7.774	-0.291
7.794	-0.292
7.814	-0.309
7.834	-0.299
7.854	-0.297
7.874	-0.301
7.894	-0.307
7.914	-0.296
7.934	-0.305
7.954	-0.302
7.974	-0.3
7.994	-0.3
8.014	-0.306
8.034	-0.304
8.054	-0.307
8.074	-0.302
8.094	-0.301
8.114	-0.296
8.134	-0.292
8.154	-0.277
8.174	-0.273
8.194	-0.258
8.214	-0.236
8.234	-0.206
8.254	-0.172
8.274	-0.133
8.294	-0.078
8.314	0
8.334	0.089
8.354	0.176
8.374	0.303
8.394	0.429
8.414	0.576
8.434	0.76
8.454	0.941
8.474	1.153
8.494	1.384
8.514	1.622
8.534	1.89
8.554	2.178
8.574	2.464
8.594	2.781
8.614	3.112
8.634	3.439
8.654	3.788
8.674	4.144
8.694	4.512
8.714	4.861
8.734	5.234
8.754	5.622
8.774	5.987
8.794	6.357
8.814	6.732
8.834	7.092
8.854	7.446
8.874	7.804
8.894	8.15
8.914	8.484
8.934	8.838
8.954	9.168
8.974	9.5
8.994	9.823
9.014	10.159
9.034	10.477
9.054	10.781
9.074	11.104
9.093	11.465
9.113	11.785
9.133	12.11
9.153	12.482
9.173	12.85
9.193	13.231
9.213	13.668
9.233	14.1
9.253	14.599
9.273	15.158
9.293	15.754
9.313	16.455
9.333	17.279
9.353	18.176
9.373	19.244
9.393	20.509
9.413	21.994
9.433	23.711
9.453	25.783
9.473	28.254
9.493	31.067
9.513	34.37
9.533	38.342
9.553	42.788
9.573	47.917
9.593	54.211
9.613	60.992
9.633	68.934
9.653	77.717
9.673	87.653
9.693	98.603
9.713	110.422
9.733	123.604
9.753	137.796
9.773	152.143
9.793	167.898
9.813	183.886
9.833	199.419
9.853	215.822
9.873	231.801
9.893	247.006
9.913	262.553
9.933	276.625
9.953	289.909
9.973	302.518
9.993	314.189
10.013	324.888
10.033	334.046
10.053	342.661
10.073	351.259
10.093	357.881
10.113	364.378
10.133	370.557
10.153	375.441
10.173	380.183
10.193	384.675
10.213	388.081
10.233	391.613
10.253	395.018
10.273	397.758
10.293	400.353
10.313	402.909
10.333	405.276
10.353	407.433
10.373	409.336
10.393	411.459
10.413	413.58
10.433	415.35
10.453	417.366
10.473	419.476
10.492	421.28
10.512	423.379
10.532	425.576
10.552	427.607
10.572	429.867
10.592	432.093
10.612	434.102
10.632	436.388
10.652	438.751
10.672	440.65
10.692	442.83
10.712	445.008
10.732	446.926
10.752	448.664
10.772	450.366
10.792	452.036
10.812	453.493
10.832	454.692
10.852	455.776
10.872	456.774
10.892	457.299
10.912	457.893
10.932	458.24
10.952	458.343
10.972	458.238
10.992	457.969
11.012	457.376
11.032	456.771
11.052	455.868
11.072	454.823
11.092	453.521
11.112	451.891
11.132	450.277
11.152	448.42
11.172	446.361
11.192	444.03
11.212	441.688
11.232	438.973
11.252	436.246
11.272	433.311
11.292	430.11
11.312	426.915
11.332	423.461
11.352	419.849
11.372	416.174
11.392	412.267
11.412	408.305
11.432	404.275
11.452	399.941
11.472	395.68
11.492	391.262
11.512	386.759
11.532	382.307
11.552	377.713
11.572	373.098
11.592	368.581
11.612	363.837
11.632	359.234
11.652	354.414
11.672	349.954
11.692	345.352
11.712	340.657
11.732	336.149
11.752	331.827
11.772	327.356
11.792	322.947
11.812	318.841
11.832	314.639
11.852	310.457
11.872	306.47
11.891	302.694
11.911	298.707
11.931	295.076
11.951	291.459
11.971	287.763
11.991	284.219
12.011	280.781
12.031	277.255
12.051	273.859
12.071	270.36
12.091	267.154
12.111	263.79
12.131	260.179
12.151	256.948
12.171	253.621
12.191	250.004
12.211	246.696
12.231	243.151
12.251	239.702
12.271	236.334
12.291	232.646
12.311	229.161
12.331	225.82
12.351	222.143
12.371	218.638
12.391	215.155
12.411	211.867
12.431	208.46
12.451	204.951
12.471	201.712
12.491	198.5
12.511	195.21
12.531	192.086
12.551	189.05
12.571	186.002
12.591	183.154
12.611	180.249
12.631	177.475
12.651	174.696
12.671	172.012
12.691	169.446
12.711	166.83
12.731	164.335
12.751	162.037
12.771	159.547
12.791	157.043
12.811	154.822
12.831	152.497
12.851	150.173
12.871	147.882
12.891	145.704
12.911	143.473
12.931	141.339
12.951	139.119
12.971	136.948
12.991	134.851
13.011	132.698
13.031	130.547
13.051	128.486
13.071	126.496
13.091	124.443
13.111	122.409
13.131	120.394
13.151	118.471
13.171	116.512
13.191	114.546
13.211	112.742
13.231	110.856
13.251	108.991
13.271	107.222
13.29	105.526
13.31	103.688
13.33	102.06
13.35	100.425
13.37	98.791
13.39	97.229
13.41	95.713
13.43	94.262
13.45	92.745
13.47	91.395
13.49	90.1
13.51	88.767
13.53	87.551
13.55	86.402
13.57	85.211
13.59	84.165
13.61	83.107
13.63	82.144
13.65	81.259
13.67	80.367
13.69	79.559
13.71	78.809
13.73	78.103
13.75	77.472
13.77	76.841
13.79	76.265
13.81	75.793
13.83	75.31
13.85	74.874
13.87	74.52
13.89	74.187
13.91	73.89
13.93	73.634
13.95	73.41
13.97	73.215
13.99	73.075
14.01	72.965
14.03	72.88
14.05	72.853
14.07	72.857
14.09	72.878
14.11	72.96
14.13	73.065
14.15	73.253
14.17	73.47
14.19	73.732
14.21	74.066
14.23	74.469
14.25	74.933
14.27	75.473
14.29	76.102
14.31	76.806
14.33	77.596
14.35	78.437
14.37	79.446
14.39	80.504
14.41	81.647
14.43	82.914
14.45	84.241
14.47	85.7
14.49	87.217
14.51	88.836
14.53	90.502
14.55	92.274
14.57	94.201
14.59	96.101
14.61	98.045
14.63	100.187
14.65	102.21
14.67	104.365
14.689	106.642
14.709	108.906
14.729	111.169
14.749	113.366
14.769	115.722
14.789	118.157
14.809	120.383
14.829	122.794
14.849	125.155
14.869	127.344
14.889	129.666
14.909	131.962
14.929	134.087
14.949	136.284
14.969	138.52
14.989	140.519
15.009	142.559
15.029	144.584
15.049	146.571
15.069	148.38
15.089	150.173
15.109	152.071
15.129	153.762
15.149	155.384
15.169	156.989
15.189	158.462
15.209	159.846
15.229	161.142
15.249	162.376
15.269	163.418
15.289	164.358
15.309	165.19
15.329	165.8
15.349	166.209
15.369	166.518
15.389	166.597
15.409	166.427
15.429	166.075
15.449	165.545
15.469	164.722
15.489	163.696
15.509	162.535
15.529	161.028
15.549	159.413
15.569	157.594
15.589	155.53
15.609	153.349
15.629	150.924
15.649	148.449
15.669	145.851
15.689	143.091
15.709	140.204
15.729	137.272
15.749	134.253
15.769	131.063
15.789	127.944
15.809	124.795
15.829	121.562
15.849	118.215
15.869	115.095
15.889	111.791
15.909	108.511
15.929	105.243
15.949	102.092
15.969	98.905
15.989	95.744
16.009	92.667
16.029	89.58
16.049	86.596
16.068	83.659
16.088	80.783
16.108	77.89
16.128	75.216
16.148	72.508
16.168	69.792
16.188	67.289
16.208	64.788
16.228	62.341
16.248	57.018
16.268	57.72
16.288	57.623
16.308	55.413
16.328	52.796
16.348	50.529
16.368	48.082
16.388	45.259
16.408	43.018
16.428	41.8
16.448	40.246
16.468	38.698
16.488	37.055
16.508	35.411
16.528	33.958
16.548	32.535
16.568	31.185
16.588	29.937
16.608	28.736
16.628	27.57
16.648	26.518
16.668	24.909
16.688	24.237
16.708	23.716
16.728	23.043
16.748	22.23
16.768	21.387
16.788	20.681
16.808	20.033
16.828	19.35
16.848	18.726
16.868	18.092
16.888	17.494
16.908	16.968
16.928	16.416
16.948	15.876
16.968	15.387
16.988	14.963
17.008	14.571
17.028	14.146
17.048	13.76
17.068	13.428
17.088	13.121
17.108	12.833
17.128	12.557
17.148	12.281
17.168	12.068
17.188	11.863
17.208	11.661
17.228	11.46
17.248	11.283
17.268	11.125
17.288	10.998
17.308	10.834
17.328	10.694
17.348	10.554
17.368	10.435
17.388	10.33
17.408	10.211
17.428	10.107
17.448	10.004
17.467	9.913
17.487	9.826
17.507	9.728
17.527	9.64
17.547	9.562
17.567	9.499
17.587	9.436
17.607	9.368
17.627	9.304
17.647	9.247
17.667	9.187
17.687	9.142
17.707	9.103
17.727	9.05
17.747	8.999
17.767	8.943
17.787	8.899
17.807	8.841
17.827	8.796
17.847	8.732
17.867	8.677
17.887	8.603
17.907	8.56
17.927	8.495
17.947	8.424
17.967	8.345
17.987	8.275
18.007	8.197
18.027	8.12
18.047	8.038
18.067	7.958
18.087	7.869
18.107	7.778
18.127	7.685
18.147	7.585
18.167	7.495
18.187	7.399
18.207	7.309
18.227	7.213
18.247	7.108
18.267	7.01
18.287	6.91
18.307	6.811
18.327	6.716
18.347	6.617
18.367	6.521
18.387	6.419
18.407	6.323
18.427	6.232
18.447	6.126
18.467	6.035
18.487	5.946
18.507	5.847
18.527	5.751
18.547	5.671

## Sheet: Suppl_fig1C_POPC
time (min)	UV abs		time (min)	total (g/mol)		time (min)	protein (g/mol)		time (min)	modifier (g/mol)
0.000117	0.264811		13.8381	394935		13.8381	247788		13.8381	147147
0.016951	0.263281		13.855	388858		13.855	244492		13.855	144366
0.033786	0.261389		13.8718	395116		13.8718	250009		13.8718	145107
0.05062	0.259908		13.8886	391706		13.8886	249627		13.8886	142078
0.067455	0.258631		13.9055	388787		13.9055	249617		13.9055	139170
0.084289	0.257065		13.9223	404810		13.9223	262570		13.9223	142240
0.101124	0.255951		13.9391	398816		13.9391	261578		13.9391	137238
0.117959	0.254802		13.956	393938		13.956	261684		13.956	132255
0.134793	0.253586		13.9728	386525		13.9728	259052		13.9728	127474
0.151628	0.252562		13.9896	392552		13.9896	265181		13.9896	127371
0.168462	0.251129		14.0065	397062		14.0065	269968		14.0065	127095
0.185297	0.250456		14.0233	400660		14.0233	274079		14.0233	126581
0.202131	0.249433		14.0401	391752		14.0401	269797		14.0401	121955
0.218966	0.247862		14.057	391030		14.057	270694		14.057	120336
0.2358	0.246857		14.0738	391964		14.0738	272512		14.0738	119453
0.252635	0.245876		14.0906	389102		14.0906	271357		14.0906	117744
0.269469	0.244334		14.1075	396964		14.1075	277653		14.1075	119311
0.286304	0.242358		14.1243	385472		14.1243	270153		14.1243	115319
0.303139	0.241353		14.1411	377792		14.1411	265795		14.1411	111997
0.319973	0.240991		14.158	375545		14.158	265485		14.158	110060
0.336808	0.240629		14.1748	378897		14.1748	268798		14.1748	110099
0.353642	0.240541		14.1916	379468		14.1916	270055		14.1916	109413
0.370477	0.23965		14.2085	376106		14.2085	269019		14.2085	107087
0.387311	0.237897		14.2253	372034		14.2253	267148		14.2253	104886
0.404146	0.237079		14.2422	370546		14.2422	266899		14.2422	103647
0.42098	0.235453		14.259	368126		14.259	265862		14.259	102264
0.437815	0.234183		14.2758	378311		14.2758	273592		14.2758	104719
0.45465	0.23393		14.2927	372800		14.2927	270003		14.2927	102797
0.471484	0.233676		14.3095	371982		14.3095	269619		14.3095	102363
0.488319	0.232689		14.3263	378241		14.3263	274051		14.3263	104190
0.505153	0.232064		14.3431	378185		14.3431	273598		14.3431	104587
0.521988	0.231222		14.36	379346		14.36	274250		14.36	105096
0.538822	0.230145		14.3768	378268		14.3768	273543		14.3768	104725
0.555657	0.229243		14.3937	384400		14.3937	278226		14.3937	106174
0.572491	0.228455		14.4105	388863		14.4105	281587		14.4105	107276
0.589326	0.22771		14.4273	388274		14.4273	281274		14.4273	107001
0.60616	0.226717		14.4442	389128		14.4442	281864		14.4442	107264
0.622995	0.225519		14.461	384621		14.461	278453		14.461	106168
0.63983	0.224478		14.4778	380386		14.4778	275017		14.4778	105369
0.656664	0.223696		14.4947	377784		14.4947	272470		14.4947	105314
0.673499	0.222559		14.5115	380075		14.5115	273434		14.5115	106641
0.690333	0.221808		14.5283	388552		14.5283	278898		14.5283	109654
0.707168	0.221273		14.5452	388280		14.5452	277808		14.5452	110472
0.724002	0.220226		14.562	387545		14.562	275806		14.562	111739
0.740837	0.21933		14.5788	390782		14.5788	276784		14.5788	113997
0.757671	0.218651		14.5957	387190		14.5957	274186		14.5957	113004
0.774506	0.217785		14.6125	390883		14.6125	277206		14.6125	113677
0.791341	0.216852		14.6293	393269		14.6293	278447		14.6293	114822
0.808175	0.216167		14.6462	395719		14.6462	279215		14.6462	116504
0.82501	0.215204		14.663	388327		14.663	272907		14.663	115420
0.841844	0.214374		14.6798	386160		14.6798	269648		14.6798	116512
0.858679	0.213333		14.6967	379625		14.6967	263326		14.6967	116300
0.875513	0.211592		14.7135	381826		14.7135	263525		14.7135	118302
0.892348	0.210039		14.7303	391445		14.7303	268756		14.7303	122688
0.909182	0.209879		14.7472	387065		14.7472	263918		14.7472	123147
0.926017	0.209357		14.764	393610		14.764	266738		14.764	126871
0.942851	0.207948		14.7808	392182		14.7808	264292		14.7808	127890
0.959686	0.206731		14.7977	397068		14.7977	266357		14.7977	130712
0.976521	0.205678		14.8145	403004		14.8145	269568		14.8145	133436
0.993355	0.204945		14.8314	393511		14.8314	262338		14.8314	131173
1.01019	0.20432		14.8482	386314		14.8482	255948		14.8482	130367
1.02702	0.203768		14.865	382684		14.865	251458		14.865	131226
1.04386	0.203306		14.8819	379836		14.8819	247696		14.8819	132140
1.06069	0.202084		14.8987	367830		14.8987	238331		14.8987	129500
1.07753	0.20082		14.9155	368666		14.9155	237332		14.9155	131333
1.09436	0.200321		14.9324	371249		14.9324	237223		14.9324	134026
1.1112	0.199238		14.9492	392283		14.9492	249041		14.9492	143242
1.12803	0.198801		14.966	378099		14.966	238249		14.966	139850
1.14487	0.19855		14.9829	365216		14.9829	228527		14.9829	136689
1.1617	0.197648		14.9997	370137		14.9997	231036		14.9997	139100
1.17854	0.196293		15.0165	376365		15.0165	234138		15.0165	142227
1.19537	0.195137		15.0334	375138		15.0334	232572		15.0334	142567
1.2122	0.194295		15.0502	387228		15.0502	238828		15.0502	148400
1.22904	0.192965		15.067	382755		15.067	234026		15.067	148729
1.24587	0.191948		15.0839	391167		15.0839	236832		15.0839	154335
1.26271	0.191015		15.1007	387242		15.1007	232411		15.1007	154832
1.27954	0.189968		15.1175	378312		15.1175	224928		15.1175	153383
1.29638	0.189621		15.1344	369825		15.1344	217847		15.1344	151978
1.31321	0.18937		15.1512	369094		15.1512	215309		15.1512	153784
1.33005	0.188112		15.168	368346		15.168	211881		15.168	156465
1.34688	0.187191		15.1849	364792		15.1849	207265		15.1849	157527
1.36372	0.18623		15.2017	366845		15.2017	206442		15.2017	160403
1.38055	0.184869		15.2186	363214		15.2186	203292		15.2186	159922
1.39738	0.183562		15.2354	346529		15.2354	192871		15.2354	153658
1.41422	0.18298
1.43105	0.182318
1.44789	0.181657
1.46472	0.18029
1.48156	0.179322
1.49839	0.178516
1.51523	0.178102
1.53206	0.176874
1.54889	0.17567
1.56573	0.174502
1.58256	0.172835
1.5994	0.170852
1.61623	0.169545
1.63307	0.169246
1.6499	0.167523
1.66674	0.165167
1.68357	0.163758
1.70041	0.162372
1.71724	0.161
1.73408	0.160134
1.75091	0.159436
1.76774	0.158395
1.78458	0.157958
1.80141	0.157405
1.81825	0.156383
1.83508	0.154974
1.85192	0.153335
1.86875	0.15198
1.88559	0.151199
1.90242	0.150236
1.91925	0.149376
1.93609	0.147924
1.95292	0.145912
1.96976	0.145546
1.98659	0.144734
2.00343	0.143543
2.02026	0.14258
2.0371	0.142203
2.05393	0.141497
2.07077	0.140791
2.0876	0.139032
2.10444	0.138051
2.12127	0.136853
2.1381	0.135504
2.15494	0.133684
2.17177	0.132269
2.18861	0.131627
2.20544	0.131382
2.22228	0.130364
2.23911	0.128545
2.25595	0.127577
2.27278	0.126723
2.28961	0.125749
2.30645	0.124985
2.32328	0.123684
2.34012	0.122498
2.35695	0.121608
2.37379	0.12149
2.39062	0.120787
2.40746	0.119245
2.42429	0.118053
2.44113	0.117145
2.45796	0.116671
2.47479	0.11598
2.49163	0.115682
2.50847	0.115313
2.5253	0.114945
2.54213	0.11385
2.55897	0.112712
2.5758	0.111629
2.59264	0.111131
2.60947	0.110156
2.62631	0.109302
2.64314	0.108659
2.65998	0.108016
2.67681	0.107319
2.69365	0.106779
2.71048	0.105942
2.72731	0.104377
2.74415	0.103475
2.76098	0.102742
2.77782	0.102044
2.79465	0.10189
2.81149	0.101525
2.82832	0.100967
2.84516	0.100185
2.86199	0.098721
2.87882	0.097686
2.89566	0.096935
2.91249	0.095936
2.92933	0.095637
2.94616	0.095182
2.963	0.094793
2.97983	0.094639
2.99667	0.093706
3.0135	0.092858
3.03034	0.091781
3.04717	0.090553
3.064	0.090387
3.08084	0.090365
3.09767	0.089915
3.11451	0.08859
3.13134	0.087586
3.14818	0.087124
3.16501	0.086366
3.18185	0.085554
3.19868	0.084152
3.21552	0.082749
3.23235	0.082577
3.24919	0.082276
3.26602	0.081974
3.28285	0.081384
3.29969	0.080802
3.31652	0.07999
3.33336	0.079577
3.35019	0.079525
3.36703	0.07944
3.38386	0.079354
3.4007	0.079183
3.41753	0.078348
3.43437	0.077247
3.4512	0.076893
3.46803	0.075907
3.48487	0.07486
3.5017	0.07466
3.51854	0.074459
3.53537	0.074047
3.55221	0.073869
3.56904	0.073365
3.58588	0.072469
3.60271	0.071874
3.61955	0.071449
3.63638	0.070794
3.65321	0.070387
3.67005	0.070112
3.68688	0.06956
3.70372	0.069406
3.72055	0.069101
3.73739	0.068984
3.75422	0.068868
3.77106	0.068578
3.78789	0.067754
3.80472	0.06696
3.82156	0.065545
3.83839	0.065
3.85523	0.064818
3.87206	0.064636
3.8889	0.064278
3.90573	0.064308
3.92257	0.064128
3.9394	0.063948
3.95624	0.063257
3.97307	0.063188
3.9899	0.062309
4.00674	0.061431
4.02357	0.060964
4.04041	0.060375
4.05724	0.059413
4.07408	0.059265
4.09091	0.059231
4.10775	0.059198
4.12458	0.059134
4.14142	0.058824
4.15825	0.057855
4.17509	0.057134
4.19192	0.056786
4.20875	0.055969
4.22559	0.055362
4.24242	0.055117
4.25926	0.054873
4.27609	0.053886
4.29293	0.05363
4.30976	0.054285
4.3266	0.054187
4.34343	0.054089
4.36027	0.053659
4.3771	0.052847
4.39393	0.052573
4.41077	0.051755
4.4276	0.051136
4.44444	0.050988
4.46127	0.050394
4.47811	0.050282
4.49494	0.049675
4.51178	0.049068
4.52861	0.04816
4.54544	0.04803
4.56228	0.047599
4.57911	0.047457
4.59595	0.047182
4.61278	0.046974
4.62962	0.046741
4.64645	0.046123
4.66329	0.045468
4.68012	0.045377
4.69696	0.045286
4.71379	0.044234
4.73062	0.044188
4.74746	0.044142
4.76429	0.043784
4.78113	0.043512
4.79796	0.04324
4.8148	0.042646
4.83163	0.042591
4.84847	0.042537
4.8653	0.042509
4.88214	0.042207
4.89897	0.041905
4.9158	0.041287
4.93264	0.041121
4.94947	0.040924
4.96631	0.040451
4.98314	0.040351
4.99998	0.040426
5.01681	0.040378
5.03365	0.040329
5.05048	0.040453
5.06732	0.04022
5.08415	0.039988
5.10098	0.03952
5.11782	0.039203
5.13465	0.039122
5.15149	0.038979
5.16832	0.038693
5.18516	0.03808
5.20199	0.037896
5.21883	0.037832
5.23566	0.036706
5.2525	0.035491
5.26933	0.03556
5.28616	0.035527
5.303	0.035495
5.31983	0.0354
5.33667	0.035351
5.3535	0.035303
5.37034	0.034769
5.38717	0.034566
5.40401	0.034304
5.42084	0.034234
5.43768	0.034164
5.45451	0.033612
5.47135	0.033374
5.48818	0.033135
5.50501	0.032438
5.52185	0.032091
5.53868	0.031955
5.55552	0.031825
5.57235	0.031713
5.58919	0.031602
5.60602	0.031647
5.62286	0.031628
5.63969	0.031545
5.65653	0.031462
5.67336	0.030826
5.6902	0.030842
5.70703	0.030736
5.72386	0.030629
5.7407	0.030173
5.75753	0.029723
5.77437	0.029268
5.7912	0.02918
5.80804	0.029557
5.82487	0.029578
5.84171	0.029554
5.85854	0.029529
5.87538	0.029351
5.89221	0.028371
5.90904	0.028434
5.92588	0.028574
5.94271	0.028629
5.95955	0.028217
5.97638	0.027806
5.99322	0.027247
6.01005	0.027267
6.02689	0.027256
6.04372	0.027001
6.06055	0.026746
6.07739	0.025807
6.09422	0.025726
6.11106	0.025656
6.12789	0.025586
6.14473	0.025203
6.16156	0.025037
6.1784	0.024738
6.19523	0.024367
6.21207	0.024165
6.2289	0.023962
6.24573	0.023579
6.26257	0.023184
6.2794	0.022529
6.29624	0.022393
6.31307	0.022637
6.32991	0.023008
6.34674	0.022996
6.36358	0.022819
6.38041	0.022642
6.39725	0.022428
6.41408	0.022141
6.43091	0.022102
6.44775	0.022431
6.46458	0.02282
6.48142	0.023069
6.49825	0.023148
6.51509	0.022977
6.53192	0.022807
6.54876	0.022743
6.56559	0.022366
6.58243	0.022538
6.59926	0.022608
6.61609	0.022677
6.63293	0.022897
6.64976	0.023195
6.6666	0.023274
6.68343	0.023352
6.70027	0.023275
6.7171	0.023198
6.73394	0.022829
6.75077	0.022989
6.76761	0.022984
6.78444	0.022915
6.80128	0.022847
6.81811	0.02253
6.83494	0.022797
6.85178	0.022843
6.86861	0.022889
6.88545	0.023015
6.90228	0.023056
6.91912	0.022845
6.93595	0.022634
6.95279	0.022493
6.96962	0.023032
6.98646	0.02318
7.00329	0.023382
7.02012	0.02382
7.03696	0.02407
7.05379	0.024109
7.07063	0.024043
7.08746	0.023977
7.1043	0.023846
7.12113	0.023589
7.13797	0.023966
7.1548	0.024023
7.17164	0.024157
7.18847	0.024158
7.2053	0.024159
7.22214	0.024644
7.23897	0.024941
7.25581	0.024978
7.27264	0.025015
7.28948	0.025182
7.30631	0.02513
7.32315	0.025078
7.33998	0.024785
7.35682	0.026121
7.37365	0.026442
7.39048	0.026525
7.40732	0.026534
7.42415	0.026543
7.44099	0.026869
7.45782	0.026922
7.47466	0.026907
7.49149	0.026893
7.50833	0.027258
7.52516	0.027848
7.542	0.0281
7.55883	0.028352
7.57566	0.028524
7.5925	0.029106
7.60933	0.02904
7.62617	0.028975
7.643	0.028662
7.65984	0.028733
7.67667	0.028687
7.69351	0.028641
7.71034	0.029247
7.72717	0.029817
7.74401	0.02984
7.76084	0.029781
7.77768	0.029723
7.79451	0.0294
7.81135	0.029367
7.82818	0.029961
7.84502	0.030166
7.86185	0.030036
7.87869	0.029906
7.89552	0.029441
7.91235	0.028666
7.92919	0.028843
7.94602	0.028904
7.96286	0.028964
7.97969	0.029012
7.99653	0.02906
8.01336	0.029335
8.0302	0.029313
8.04703	0.029265
8.06387	0.029216
8.0807	0.028676
8.09754	0.02775
8.11437	0.027833
8.1312	0.027796
8.14804	0.027758
8.16487	0.027496
8.18171	0.026823
8.19854	0.026555
8.21538	0.0269
8.23221	0.027057
8.24905	0.026911
8.26588	0.026765
8.28271	0.026659
8.29955	0.026553
8.31638	0.026055
8.33322	0.025406
8.35005	0.025029
8.36689	0.023994
8.38372	0.023562
8.40056	0.023294
8.41739	0.022844
8.43423	0.022134
8.45106	0.021432
8.4679	0.021242
8.48473	0.020605
8.50156	0.019709
8.5184	0.018957
8.53523	0.018906
8.55207	0.018794
8.5689	0.018766
8.58574	0.018498
8.60257	0.017493
8.61941	0.016584
8.63624	0.015996
8.65307	0.015969
8.66991	0.015537
8.68674	0.015015
8.70358	0.014547
8.72041	0.013633
8.73725	0.013183
8.75408	0.013053
8.77092	0.012917
8.78775	0.012745
8.80459	0.012679
8.82142	0.012612
8.83826	0.012588
8.85509	0.012564
8.87192	0.012126
8.88876	0.011761
8.90559	0.011378
8.92243	0.011293
8.93926	0.011208
8.9561	0.010541
8.97293	0.009995
8.98977	0.0096
9.0066	0.009379
9.02343	0.009469
9.04027	0.009504
9.0571	0.00878
9.07394	0.008057
9.09077	0.007227
9.10761	0.007454
9.12444	0.007619
9.14128	0.007592
9.15811	0.007565
9.17495	0.007121
9.19178	0.00722
9.20861	0.007256
9.22545	0.007292
9.24229	0.007712
9.25912	0.007698
9.27595	0.00767
9.29279	0.007641
9.30962	0.006727
9.32646	0.006229
9.34329	0.006087
9.36013	0.005958
9.37696	0.00593
9.3938	0.005794
9.41063	0.005658
9.42746	0.004961
9.4443	0.004831
9.46113	0.004201
9.47797	0.00392
9.4948	0.004071
9.51164	0.003996
9.52847	0.003922
9.54531	0.003316
9.56214	0.003449
9.57898	0.003581
9.59581	0.003825
9.61265	0.003778
9.62948	0.00373
9.64631	0.003647
9.66315	0.002908
9.67998	0.00247
9.69682	0.002237
9.71365	0.001836
9.73049	0.001658
9.74732	0.001522
9.76416	0.001344
9.78099	0.001165
9.79782	0.000667
9.81466	0.000489
9.83149	0.000399
9.84833	0.000308
9.86516	-2.87e-06
9.882	-0.00039
9.89883	-0.00044
9.91567	-0.00052
9.9325	0.000208
9.94934	0.000953
9.96617	0.000939
9.98301	0.00085
9.99984	0.000762
10.0167	0.000258
10.0335	0.000166
10.0503	7.39e-05
10.0672	-0.00016
10.084	-0.00027
10.1008	-0.00012
10.1177	2.19e-05
10.1345	0.000224
10.1514	0.000266
10.1682	0.000252
10.185	8.99e-05
10.2019	-7.24e-05
10.2187	-0.00038
10.2355	-0.0006
10.2524	-0.00042
10.2692	-3.66e-05
10.286	-8.51e-05
10.3029	-0.00013
10.3197	-0.00027
10.3365	-0.00057
10.3534	1.56e-06
10.3702	0.000216
10.387	0.00028
10.4039	0.00027
10.4207	-0.00029
10.4375	-0.00085
10.4544	-0.00109
10.4712	-0.00096
10.488	-0.00083
10.5049	-0.00068
10.5217	-0.00055
10.5385	-0.00053
10.5554	-0.00051
10.5722	0.000178
10.5891	0.000229
10.6059	0.000195
10.6227	0.000162
10.6395	2.62e-05
10.6564	5.33e-05
10.6732	8.05e-05
10.6901	0.0012
10.7069	0.002373
10.7237	0.002228
10.7406	0.002083
10.7574	0.001784
10.7742	0.001166
10.7911	0.001753
10.8079	0.001753
10.8247	0.001753
10.8416	0.002106
10.8584	0.002887
10.8752	0.00281
10.8921	0.002733
10.9089	0.0026
10.9257	0.002525
10.9426	0.002609
10.9594	0.002694
10.9762	0.00298
10.9931	0.003314
11.0099	0.003319
11.0267	0.0033
11.0436	0.003054
11.0604	0.002807
11.0772	0.002834
11.0941	0.003428
11.1109	0.003603
11.1278	0.003608
11.1446	0.003612
11.1614	0.003977
11.1783	0.004517
11.1951	0.004858
11.2119	0.00512
11.2288	0.005883
11.2456	0.007098
11.2624	0.007524
11.2793	0.007835
11.2961	0.008181
11.3129	0.008408
11.3298	0.008703
11.3466	0.008834
11.3634	0.008966
11.3803	0.009982
11.3971	0.011397
11.4139	0.011487
11.4308	0.011578
11.4476	0.012431
11.4644	0.012947
11.4813	0.01374
11.4981	0.014672
11.515	0.015291
11.5318	0.01673
11.5486	0.017602
11.5655	0.018057
11.5823	0.019333
11.5991	0.020621
11.616	0.02124
11.6328	0.021641
11.6496	0.022247
11.6665	0.022938
11.6833	0.024039
11.7001	0.025315
11.717	0.026543
11.7338	0.027427
11.7506	0.027599
11.7675	0.02762
11.7843	0.028787
11.8011	0.030329
11.818	0.030881
11.8348	0.031421
11.8516	0.033089
11.8685	0.0348
11.8853	0.035907
11.9021	0.03711
11.919	0.038935
11.9358	0.04111
11.9527	0.042356
11.9695	0.043126
11.9863	0.044166
12.0031	0.045093
12.02	0.045983
12.0368	0.046655
12.0536	0.047534
12.0705	0.049654
12.0873	0.051498
12.1042	0.052979
12.121	0.054388
12.1378	0.05512
12.1547	0.055998
12.1715	0.057376
12.1883	0.059045
12.2052	0.060834
12.222	0.062545
12.2388	0.064171
12.2557	0.066413
12.2725	0.068491
12.2893	0.070359
12.3062	0.072136
12.323	0.074294
12.3398	0.076843
12.3567	0.078479
12.3735	0.080859
12.3903	0.083584
12.4072	0.08594
12.424	0.088502
12.4408	0.090804
12.4577	0.092841
12.4745	0.095354
12.4914	0.098103
12.5082	0.100719
12.525	0.103672
12.5419	0.106886
12.5587	0.109725
12.5755	0.11228
12.5924	0.114803
12.6092	0.11734
12.626	0.120198
12.6429	0.12326
12.6597	0.126461
12.6765	0.129011
12.6934	0.131627
12.7102	0.134858
12.727	0.137752
12.7439	0.140754
12.7607	0.144408
12.7775	0.148013
12.7944	0.150816
12.8112	0.152814
12.828	0.155068
12.8449	0.158148
12.8617	0.161313
12.8786	0.164152
12.8954	0.167607
12.9122	0.172244
12.9291	0.17623
12.9459	0.179105
12.9627	0.182597
12.9795	0.186763
12.9964	0.190725
13.0132	0.194149
13.0301	0.197538
13.0469	0.202026
13.0637	0.206513
13.0806	0.209986
13.0974	0.213616
13.1142	0.217559
13.1311	0.2214
13.1479	0.224433
13.1647	0.227139
13.1816	0.231209
13.1984	0.23508
13.2152	0.238088
13.2321	0.241477
13.2489	0.244413
13.2657	0.247849
13.2826	0.251662
13.2994	0.254538
13.3163	0.257377
13.3331	0.260289
13.3499	0.263496
13.3667	0.267144
13.3836	0.270629
13.4004	0.274548
13.4172	0.277949
13.4341	0.281621
13.4509	0.286017
13.4678	0.290522
13.4846	0.294743
13.5014	0.299328
13.5183	0.304749
13.5351	0.310443
13.5519	0.316323
13.5688	0.321884
13.5856	0.328477
13.6024	0.336488
13.6193	0.345168
13.6361	0.354416
13.6529	0.364226
13.6698	0.375122
13.6866	0.386524
13.7034	0.398995
13.7203	0.412643
13.7371	0.426409
13.7539	0.44107
13.7708	0.456093
13.7876	0.471744
13.8044	0.488517
13.8213	0.506189
13.8381	0.523807
13.855	0.54145
13.8718	0.560565
13.8886	0.580204
13.9055	0.60014
13.9223	0.620522
13.9391	0.640663
13.956	0.661009
13.9728	0.681485
13.9896	0.702042
14.0065	0.722279
14.0233	0.742474
14.0401	0.762362
14.057	0.781609
14.0738	0.800416
14.0906	0.818234
14.1075	0.83616
14.1243	0.853494
14.1411	0.869718
14.158	0.886014
14.1748	0.901423
14.1916	0.914888
14.2085	0.92725
14.2253	0.938774
14.2422	0.949241
14.259	0.95899
14.2758	0.968027
14.2927	0.97596
14.3095	0.98222
14.3263	0.987715
14.3431	0.992793
14.36	0.99647
14.3768	0.998464
14.3937	1
14.4105	0.999733
14.4273	0.999466
14.4442	0.998615
14.461	0.997435
14.4778	0.994988
14.4947	0.990441
14.5115	0.985314
14.5283	0.980133
14.5452	0.97342
14.562	0.964877
14.5788	0.956142
14.5957	0.947738
14.6125	0.93887
14.6293	0.928982
14.6462	0.918603
14.663	0.907321
14.6798	0.895261
14.6967	0.882881
14.7135	0.871665
14.7303	0.85984
14.7472	0.847128
14.764	0.835025
14.7808	0.822614
14.7977	0.810174
14.8145	0.797558
14.8314	0.784393
14.8482	0.771415
14.865	0.758492
14.8819	0.745069
14.8987	0.732169
14.9155	0.719758
14.9324	0.70704
14.9492	0.694436
14.966	0.681465
14.9829	0.668982
14.9997	0.65744
15.0165	0.645482
15.0334	0.6335
15.0502	0.621917
15.067	0.610677
15.0839	0.599069
15.1007	0.58728
15.1175	0.575774
15.1344	0.564353
15.1512	0.554501
15.168	0.544613
15.1849	0.533711
15.2017	0.524275
15.2186	0.514677
15.2354	0.504487
15.2522	0.49466
15.2691	0.485176
15.2859	0.475861
15.3027	0.466842
15.3196	0.457962
15.3364	0.449024
15.3532	0.440464
15.3701	0.432669
15.3869	0.424948
15.4037	0.417057
15.4206	0.409559
15.4374	0.401687
15.4542	0.394013
15.4711	0.38628
15.4879	0.378691
15.5047	0.371845
15.5216	0.364992
15.5384	0.358532
15.5552	0.351926
15.5721	0.344671
15.5889	0.33748
15.6057	0.330863
15.6226	0.324957
15.6394	0.318907
15.6562	0.312839
15.6731	0.307001
15.6899	0.301464
15.7067	0.296029
15.7236	0.289768
15.7404	0.283869
15.7573	0.278326
15.7741	0.273025
15.7909	0.268695
15.8078	0.264586
15.8246	0.259532
15.8414	0.254237
15.8583	0.249858
15.8751	0.246131
15.8919	0.242206
15.9088	0.237755
15.9256	0.233781
15.9424	0.230169
15.9593	0.226243
15.9761	0.222239
15.9929	0.2187
16.0098	0.214883
16.0266	0.210985
16.0434	0.206794
16.0603	0.202614
16.0771	0.198972
16.0939	0.195487
16.1108	0.191797
16.1276	0.188426
16.1444	0.18616
16.1613	0.183254
16.1781	0.180173
16.1949	0.177804
16.2118	0.174615
16.2286	0.171148
16.2455	0.168315
16.2623	0.166141
16.2791	0.164309
16.296	0.161579
16.3128	0.159107
16.3296	0.156998
16.3465	0.15472
16.3633	0.152954
16.3801	0.150773
16.397	0.147788
16.4138	0.14548
16.4306	0.144125
16.4475	0.142257
16.4643	0.140112
16.4811	0.138565
16.498	0.137723
16.5148	0.136296
16.5316	0.134886
16.5485	0.133115
16.5653	0.13138
16.5821	0.130049
16.599	0.127681
16.6158	0.125722
16.6327	0.124615
16.6495	0.123712
16.6663	0.122406
16.6832	0.121159
16.7	0.120003
16.7168	0.117968
16.7337	0.115883
16.7505	0.114335
16.7673	0.112871
16.7842	0.111094
16.801	0.110017
16.8178	0.109229
16.8347	0.107705
16.8515	0.106338
16.8683	0.105375
16.8852	0.104491
16.902	0.103559
16.9188	0.102704
16.9357	0.101283
16.9525	0.099833
16.9693	0.098876
16.9862	0.097919
17.003	0.0968
17.0199	0.095734
17.0367	0.094615
17.0535	0.093501
17.0704	0.092364
17.0872	0.091781
17.104	0.091168
17.1209	0.090115
17.1377	0.088392
17.1545	0.087158
17.1714	0.087041
17.1882	0.086687
17.205	0.086214
17.2219	0.08495
17.2387	0.083269
17.2555	0.082553
17.2724	0.082297
17.2892	0.081781
17.306	0.080752
17.3229	0.079596
17.3397	0.07879
17.3565	0.077489
17.3734	0.076195
17.3902	0.075612
17.407	0.075344
17.4239	0.074617
17.4407	0.07354
17.4575	0.073216
17.4744	0.073153
17.4912	0.073089
17.5081	0.072175
17.5249	0.071098
17.5417	0.069248
17.5586	0.067996
17.5754	0.067474
17.5922	0.06677
17.6091	0.066647
17.6259	0.066463
17.6427	0.065163
17.6596	0.064085
17.6764	0.063922
17.6932	0.063759
17.7101	0.063315
17.7269	0.062968
17.7437	0.062488
17.7606	0.06126
17.7774	0.06081
17.7942	0.059932
17.8111	0.059132
17.8279	0.059002
17.8447	0.058872
17.8616	0.0587
17.8784	0.058522
17.8952	0.058109
17.9121	0.057849
17.9289	0.057589
17.9458	0.056657
17.9626	0.05663
17.9794	0.056144
17.9962	0.05567
18.0131	0.055546
18.0299	0.055422
18.0467	0.055108
18.0636	0.054794
18.0804	0.053548
18.0973	0.052779
18.1141	0.051943
18.1309	0.051342
18.1478	0.051019
18.1646	0.050781
18.1814	0.050349
18.1983	0.049929
18.2151	0.049389
18.2319	0.04842
18.2488	0.047566
18.2656	0.046875
18.2824	0.046456
18.2993	0.046236
18.3161	0.046015
18.3329	0.045137
18.3498	0.044362
18.3666	0.0439
18.3834	0.043565
18.4003	0.04323
18.4171	0.042207
18.4339	0.041923
18.4508	0.041639
18.4676	0.041406
18.4844	0.041301
18.5013	0.040525
18.5181	0.040069
18.535	0.040024
18.5518	0.039927
18.5686	0.039831
18.5855	0.039659
18.6023	0.03936
18.6191	0.037848
18.636	0.036825
18.6528	0.036218
18.6696	0.035938
18.6865	0.035846
18.7033	0.035755
18.7201	0.035584
18.737	0.034549
18.7538	0.03352
18.7706	0.033493
18.7875	0.034129
18.8043	0.033826
18.8211	0.033523
18.838	0.032931
18.8548	0.032524
18.8716	0.031923
18.8885	0.031322
18.9053	0.030299
18.9221	0.029759
18.939	0.028966
18.9558	0.028884
18.9727	0.029285
18.9895	0.029342
19.0063	0.0293
19.0232	0.029258
19.04	0.029115
19.0568	0.029366
19.0737	0.029348
19.0905	0.029253
19.1073	0.029157
19.1242	0.028937
19.141	0.02879
19.1578	0.028644
19.1747	0.028318
19.1915	0.027705
19.2083	0.027755
19.2252	0.027701
19.242	0.027648
19.2588	0.027125
19.2757	0.026983
19.2925	0.027001
19.3093	0.026939
19.3262	0.026877
19.343	0.02644
19.3599	0.026283
19.3767	0.026127
19.3935	0.025808
19.4104	0.025594
19.4272	0.025549
19.444	0.025503
19.4609	0.024939
19.4777	0.024164
19.4945	0.024365
19.5114	0.024231
19.5282	0.024097
19.545	0.023819
19.5619	0.024413
19.5787	0.024567
19.5955	0.024453
19.6124	0.024339
19.6292	0.024129
19.646	0.023377
19.6629	0.023404
19.6797	0.023787
19.6965	0.023774
19.7134	0.023734
19.7302	0.023693
19.747	0.02322
19.7639	0.022878
19.7807	0.0228
19.7976	0.022721
19.8144	0.022054
19.8312	0.021502
19.8481	0.021794
19.8649	0.021847
19.8817	0.021753
19.8986	0.021658
19.9154	0.02136
19.9322	0.021899
19.9491	0.021704
19.9659	0.02151
19.9827	0.021015
19.9996	0.02033
20.0164	0.020103
20.0332	0.020426
20.0501	0.020393
20.0669	0.020361
20.0837	0.020205
20.1006	0.019568
20.1174	0.019065
20.1342	0.01895
20.1511	0.018835
20.1679	0.018518
20.1847	0.018087
20.2016	0.017691
20.2184	0.016982
20.2353	0.016731
20.2521	0.016481
20.2689	0.014921
20.2858	0.014278
20.3026	0.014202
20.3194	0.014048
20.3362	0.014009
20.3531	0.013969
20.3699	0.013562
20.3868	0.013155
20.4036	0.013151
20.4204	0.013314
20.4373	0.013312
20.4541	0.01296
20.4709	0.012608
20.4878	0.012894
20.5046	0.013108
20.5214	0.012765
20.5383	0.012421
20.5551	0.011747
20.5719	0.011098
20.5888	0.011355
20.6056	0.011342
20.6224	0.01133
20.6393	0.011411
20.6561	0.011384
20.6729	0.011357
20.6898	0.011317
20.7066	0.011006
20.7234	0.010696
20.7403	0.010722
20.7571	0.010703
20.7739	0.010527
20.7908	0.010351
20.8076	0.010315
20.8244	0.010278
20.8413	0.010197
20.8581	0.009548
20.875	0.009918
20.8918	0.010131
20.9086	0.010174
20.9255	0.010082
20.9423	0.00999
20.9591	0.010247
20.976	0.010078
20.9928	0.00991
21.0096	0.009531
21.0265	0.009552
21.0433	0.009607
21.0601	0.009524
21.077	0.009441
21.0938	0.009371
21.1106	0.009301
21.1275	0.009961
21.1443	0.00997
21.1611	0.00994
21.178	0.00991
21.1948	0.009762
21.2116	0.009385
21.2285	0.008953
21.2453	0.008871
21.2621	0.008772
21.279	0.009143
21.2958	0.008958
21.3127	0.008773
21.3295	0.008421
21.3463	0.007984
21.3632	0.00868
21.38	0.009141
21.3968	0.009163
21.4137	0.009232
21.4305	0.009301
21.4473	0.0103
21.4642	0.010376
21.481	0.010318
21.4978	0.01026
21.5147	0.010323
21.5315	0.011417
21.5483	0.011783
21.5652	0.012142
21.582	0.013496
21.5988	0.015038
21.6157	0.016501
21.6325	0.017252
21.6493	0.017744
21.6662	0.018139
21.683	0.018763
21.6999	0.02013
21.7167	0.021479
21.7335	0.022876
21.7504	0.024248
21.7672	0.025053
21.784	0.026914
21.8009	0.029167
21.8177	0.030438
21.8345	0.032052
21.8514	0.033558
21.8682	0.035063
21.885	0.036943
21.9019	0.038732
21.9187	0.040738
21.9355	0.042829
21.9524	0.044485
21.9692	0.046305
21.986	0.04805
22.0029	0.049917
22.0197	0.052684
22.0365	0.054407
22.0534	0.055183
22.0702	0.056368
22.0871	0.057083
22.1039	0.058414
22.1207	0.059859
22.1376	0.061087
22.1544	0.062689
22.1712	0.063579
22.1881	0.064378
22.2049	0.065159
22.2217	0.065777
22.2386	0.066396
22.2554	0.067406
22.2722	0.06826
22.2891	0.068884
22.3059	0.069316
22.3227	0.069361
22.3396	0.069774
22.3564	0.070555
22.3732	0.070896
22.3901	0.070858
22.4069	0.07082
22.4237	0.070754
22.4406	0.070638
22.4574	0.070521
22.4742	0.070099
22.4911	0.069269
22.5079	0.069223
22.5247	0.068976
22.5416	0.068729
22.5584	0.067838
22.5753	0.06769
22.5921	0.067946
22.6089	0.06797
22.6258	0.067827
22.6426	0.067683
22.6594	0.067427
22.6763	0.066513
22.6931	0.065056
22.7099	0.064431
22.7268	0.063462
22.7436	0.062168
22.7604	0.06103
22.7773	0.059615
22.7941	0.058555
22.8109	0.05752
22.8278	0.056431
22.8446	0.055233
22.8614	0.054156
22.8783	0.05312
22.8951	0.051603
22.9119	0.050333
22.9288	0.049256
22.9456	0.048028
22.9624	0.046806
22.9793	0.045843
22.9961	0.045242
23.013	0.044026
23.0298	0.042569
23.0466	0.041352
23.0634	0.040335
23.0803	0.039125
23.0971	0.037173
23.1139	0.035921
23.1308	0.035622
23.1476	0.035154
23.1645	0.033921
23.1813	0.032505
23.1981	0.031512
23.215	0.030562
23.2318	0.029593
23.2486	0.029095
23.2655	0.028862
23.2823	0.028147
23.2991	0.027323
23.316	0.02668
23.3328	0.026086
23.3496	0.025859
23.3665	0.025796
23.3833	0.025957
23.4001	0.025984
23.417	0.025742
23.4338	0.0255
23.4506	0.025652
23.4675	0.025619
23.4843	0.025587
23.5011	0.025445
23.518	0.026033
23.5348	0.02625
23.5516	0.026312
23.5685	0.026374
23.5853	0.026895
23.6022	0.026886
23.619	0.027944
23.6358	0.028276
23.6527	0.028296
23.6695	0.028316
23.6863	0.028385
23.7032	0.028759
23.72	0.028929
23.7368	0.029099
23.7537	0.029096
23.7705	0.029259
23.7873	0.029281
23.8042	0.028896
23.821	0.028511
23.8378	0.028405
23.8547	0.027708
23.8715	0.02657
23.8883	0.026368
23.9052	0.025719
23.922	0.024654
23.9388	0.023468
23.9557	0.021998
23.9725	0.020836
23.9894	0.020206
24.0062	0.019062
24.023	0.017001
24.0399	0.015218
24.0567	0.014153
24.0735	0.012491
24.0904	0.010641
24.1072	0.009268
24.124	0.007907
24.1409	0.006691
24.1577	0.00568
24.1745	0.004391
24.1914	0.003573
24.2082	0.002641
24.225	0.001045
24.2419	-0.00026
24.2587	-0.00068
24.2755	-0.00085
24.2924	-0.00103
24.3092	-0.00249
24.326	-0.00245
24.3429	-0.0025
24.3597	-0.00255
24.3765	-0.00205
24.3934	-0.00178
24.4102	-0.0015
24.4271	-0.00131
24.4439	-0.00073
24.4607	-0.00057
24.4776	-0.00022
24.4944	0.000318
24.5112	0.001189
24.5281	0.002742
24.5449	0.003971
24.5617	0.004644
24.5786	0.006052
24.5954	0.007642
24.6122	0.008846
24.6291	0.009971
24.6459	0.011646
24.6627	0.013314
24.6796	0.014482
24.6964	0.016205
24.7132	0.018247
24.7301	0.020368
24.7469	0.022553
24.7637	0.024741
24.7806	0.027658
24.7974	0.030352
24.8142	0.032401
24.8311	0.034933
24.8479	0.038182
24.8648	0.041588
24.8816	0.045568
24.8984	0.049861
24.9153	0.053564
24.9321	0.057942
24.9489	0.063309
24.9657	0.067948
24.9826	0.072483
24.9994	0.077489
25.0163	0.082959
25.0331	0.088646
25.0499	0.094599
25.0668	0.101318
25.0836	0.107127
25.1004	0.111879
25.1173	0.1168
25.1341	0.121703
25.1509	0.125888
25.1678	0.12979
25.1846	0.133419
25.2014	0.136629
25.2183	0.139378
25.2351	0.14162
25.2519	0.1435
25.2688	0.144541
25.2856	0.144477
25.3025	0.144412
25.3193	0.144044
25.3361	0.143666
25.3529	0.142861
25.3698	0.141367
25.3866	0.139819
25.4034	0.137142
25.4203	0.133817
25.4371	0.131038
25.454	0.128283
25.4708	0.125015
25.4876	0.121349
25.5045	0.116796
25.5213	0.112961
25.5381	0.109934
25.555	0.105604
25.5718	0.101177
25.5886	0.097215
25.6055	0.09329
25.6223	0.089949
25.6391	0.08618
25.656	0.082506
25.6728	0.078695
25.6896	0.074836
25.7065	0.071254
25.7233	0.069119
25.7401	0.066883
25.757	0.061933
25.7738	0.057657
25.7906	0.054733
25.8075	0.052219
25.8243	0.049959
25.8411	0.047976
25.858	0.045891
25.8748	0.043607
25.8916	0.041451
25.9085	0.039535
25.9253	0.037896
25.9422	0.035938
25.959	0.034275
25.9758	0.032413
25.9927	0.030099
26.0095	0.028225
26.0263	0.026562
26.0432	0.025786
26.06	0.025355
26.0768	0.023915
26.0937	0.022349
26.1105	0.021689
26.1273	0.021281
26.1442	0.020434
26.161	0.019736
26.1778	0.019136
26.1947	0.018529
26.2115	0.01788
26.2283	0.01781
26.2452	0.017747
26.262	0.017569
26.2788	0.017391
26.2957	0.01577
26.3125	0.015363
26.3294	0.015263
26.3462	0.015356
26.363	0.015655
26.3799	0.016406
26.3967	0.016303
26.4135	0.016201
26.4304	0.015836
26.4472	0.016182
26.464	0.016282
26.4809	0.016161
26.4977	0.016041
26.5145	0.015795
26.5314	0.015491
26.5482	0.016374
26.565	0.01648
26.5819	0.016573
26.5987	0.018059
26.6155	0.019119
26.6324	0.019593
26.6492	0.019777
26.666	0.020093
26.6829	0.020639
26.6997	0.022156
26.7166	0.023644
26.7334	0.024697
26.7502	0.02575
26.7671	0.026754
26.7839	0.028332
26.8007	0.029728
26.8176	0.03101
26.8344	0.031973
26.8512	0.032368
26.8681	0.033686
26.8849	0.035638
26.9017	0.037041
26.9186	0.038191
26.9354	0.038845
26.9522	0.039886
26.9691	0.041168
26.9859	0.0414
27.0027	0.041323
27.0196	0.041245
27.0364	0.041102
27.0532	0.04132
27.0701	0.041414
27.0869	0.041447
27.1037	0.041334
27.1206	0.041221
27.1374	0.040962
27.1543	0.040078
27.1711	0.040038
27.1879	0.039329
27.2048	0.038873
27.2216	0.038297
27.2384	0.03664
27.2553	0.034985
27.2721	0.033473
27.2889	0.031865
27.3058	0.030624
27.3226	0.029975
27.3394	0.028777
27.3563	0.027561
27.3731	0.026586
27.3899	0.024749
27.4068	0.022296
27.4236	0.02015
27.4404	0.018614
27.4573	0.017953
27.4741	0.016839
27.4909	0.015124
27.5078	0.013913
27.5246	0.01248
27.5414	0.010595
27.5583	0.009402
27.5751	0.009175
27.5919	0.008128
27.6088	0.007214
27.6256	0.00674
27.6425	0.005379
27.6593	0.004314
27.6761	0.003472
27.6929	0.0024
27.7098	0.001287
27.7266	-1.85e-05
27.7434	-0.00122
27.7603	-0.00125
27.7771	-0.0013
27.794	-0.00134
27.8108	-0.00253
27.8276	-0.00342
27.8445	-0.00389
27.8613	-0.0053
27.8781	-0.00583
27.895	-0.00604
27.9118	-0.00625
27.9286	-0.00649
27.9455	-0.00686
27.9623	-0.00775
27.9791	-0.00857
27.996	-0.00862
28.0128	-0.00861
28.0296	-0.00868
28.0465	-0.00874
28.0633	-0.00924
28.0801	-0.00928
28.097	-0.00932
28.1138	-0.01019
28.1306	-0.01131
28.1475	-0.01214
28.1643	-0.0121
28.1811	-0.01206
28.198	-0.01203
28.2148	-0.01167
28.2317	-0.01198
28.2485	-0.0123
28.2653	-0.01297
28.2822	-0.01397
28.299	-0.01406
28.3158	-0.0135
28.3327	-0.01344
28.3495	-0.01345
28.3663	-0.01351
28.3832	-0.01356
28.4	-0.01425
28.4168	-0.01441
28.4337	-0.01451
28.4505	-0.01393
28.4673	-0.01381
28.4842	-0.01368
28.501	0.209691
28.5178	0.64174
28.5347	0.797646
28.5515	0.760383
28.5683	0.723119
28.5852	0.610409
28.602	0.569114
28.6188	0.604353
28.6357	0.608526
28.6525	0.608938
28.6694	0.597246
28.6862	0.585555
28.703	0.568547
28.7199	0.57093
28.7367	0.599392
28.7535	0.644522
28.7704	0.682702
28.7872	0.683808
28.804	0.683017
28.8209	0.682226
28.8377	0.680377
28.8545	0.693524
28.8714	0.688985
28.8882	0.684447
28.905	0.667689
28.9219	0.595344
28.9387	0.522104
28.9555	0.483153
28.9724	0.492114
28.9892	0.527429
29.006	0.526401
29.0229	0.525374
29.0397	0.513693
29.0566	0.470331
29.0734	0.430427
29.0902	0.399768
29.1071	0.387655
29.1239	0.400613
29.1407	0.427749
29.1576	0.423803
29.1744	0.419857
29.1912	0.407724
29.2081	0.390547
29.2249	0.410246
29.2417	0.460322
29.2586	0.511523
29.2754	0.543145
29.2922	0.546833
29.3091	0.547972
29.3259	0.549112
29.3427	0.558629
29.3596	0.567054
29.3764	0.5696
29.3932	0.543964
29.4101	0.518328
29.4269	0.43778
29.4437	0.355217
29.4606	0.294992
29.4774	0.268102
29.4943	0.269663
29.5111	0.296626
29.5279	0.345026
29.5448	0.400679
29.5616	0.395856
29.5784	0.391033
29.5953	0.367145
29.6121	0.278679
29.6289	0.211406
29.6458	0.194986
29.6626	0.218626
29.6794	0.250821
29.6963	0.275852
29.7131	0.295668
29.7299	0.318403
29.7468	0.34564
29.7636	0.376227
29.7804	0.415055
29.7973	0.458293
29.8141	0.462705
29.8309	0.462609
29.8478	0.462513
29.8646	0.451815
29.8814	0.470462
29.8983	0.504639
29.9151	0.502807
29.932	0.500974
29.9488	0.491449
29.9656	0.475265
29.9825	0.482417

## Sheet: Suppl_fig1D_EPL
time (min)	UV (abs)		time (min)	total (g/mol		time (min)	protein (g/mol)		time (min)	modifier (g/mol)
-0.30302	10.9611		14.0232	1111231		14.0232	641393		14.0232	469838
-0.28619	10.7143		14.04	1021292		14.04	586711		14.04	434581
-0.26935	10.4113		14.0569	1053729		14.0569	608602		14.0569	445127
-0.25252	9.99451		14.0737	1039073		14.0737	606033		14.0737	433041
-0.23568	8.90824		14.0905	988438		14.0905	578244		14.0905	410193
-0.21885	8.1749		14.1074	908297		14.1074	530634		14.1074	377663
-0.20202	7.75809		14.1242	884612		14.1242	518972		14.1242	365640
-0.18518	7.31851		14.141	906177		14.141	536836		14.141	369341
-0.16835	6.93623		14.1579	959103		14.1579	575532		14.1579	383570
-0.15151	6.68664		14.1747	948957		14.1747	584278		14.1747	364678
-0.13468	6.34565		14.1915	991138		14.1915	624762		14.1915	366376
-0.11784	5.94043		14.2084	957136		14.2084	611762		14.2084	345374
-0.10101	5.53648		14.2252	923468		14.2252	597788		14.2252	325680
-0.08417	5.22532		14.242	893475		14.242	583147		14.242	310328
-0.06734	5.0914		14.2589	882464		14.2589	579970		14.2589	302494
-0.0505	4.95057		14.2757	884779		14.2757	587658		14.2757	297121
-0.03367	4.56333		14.2925	880109		14.2925	590793		14.2925	289316
-0.01684	4.19347		14.3094	866600		14.3094	585513		14.3094	281087
-4.87e-07	4.17872		14.3262	847029		14.3262	573408		14.3262	273621
0.016834	4.12679		14.343	810692		14.343	549683		14.343	261009
0.033669	3.96516		14.3599	799429		14.3599	547719		14.3599	251710
0.050503	3.95458		14.3767	790810		14.3767	549638		14.3767	241171
0.067338	3.90701		14.3935	764786		14.3935	537484		14.3935	227302
0.084172	3.63624		14.4104	778703		14.4104	551105		14.4104	227598
0.101007	3.37892		14.4272	782548		14.4272	555331		14.4272	227216
0.117841	3.17879		14.444	761013		14.444	542670		14.444	218343
0.134676	2.92227		14.4609	751335		14.4609	537493		14.4609	213842
0.15151	2.73693		14.4777	758907		14.4777	544216		14.4777	214691
0.168345	2.6649		14.4946	789916		14.4946	569720		14.4946	220196
0.18518	2.64871		14.5114	777992		14.5114	563967		14.5114	214024
0.202014	2.62005		14.5282	758897		14.5282	552005		14.5282	206892
0.218849	2.52018		14.545	742176		14.545	543089		14.545	199087
0.235683	2.45089		14.5619	768555		14.5619	567312		14.5619	201243
0.252518	2.3816		14.5787	748938		14.5787	558546		14.5787	190391
0.269352	2.27927		14.5955	729574		14.5955	548265		14.5955	181309
0.286187	2.21531		14.6124	735382		14.6124	555138		14.6124	180245
0.303021	2.21727		14.6292	761555		14.6292	577522		14.6292	184033
0.319856	2.2159		14.6461	742417		14.6461	564958		14.6461	177458
0.336691	2.21452		14.6629	724292		14.6629	552561		14.6629	171731
0.353525	2.15901		14.6797	722459		14.6797	552066		14.6797	170393
0.37036	1.97975		14.6966	706151		14.6966	540755		14.6966	165396
0.387194	1.89252		14.7134	690642		14.7134	529361		14.7134	161281
0.404029	1.81251		14.7302	711860		14.7302	546379		14.7302	165481
0.420863	1.81241		14.7471	708222		14.7471	545431		14.7471	162791
0.437698	1.78581		14.7639	696243		14.7639	537921		14.7639	158321
0.454532	1.77196		14.7807	699603		14.7807	542710		14.7807	156893
0.471367	1.54481		14.7976	708435		14.7976	551880		14.7976	156555
0.488201	1.39729		14.8144	694226		14.8144	543021		14.8144	151205
0.505036	1.41715		14.8312	700459		14.8312	548408		14.8312	152051
0.521871	1.41871		14.8481	704157		14.8481	550607		14.8481	153550
0.538705	1.41566		14.8649	698734		14.8649	546510		14.8649	152224
0.55554	1.4126		14.8817	708340		14.8817	554207		14.8817	154133
0.572374	1.3811		14.8986	699717		14.8986	547835		14.8986	151882
0.589209	1.3496		14.9154	694053		14.9154	543369		14.9154	150685
0.606043	1.2739		14.9322	687518		14.9322	538730		14.9322	148787
0.622878	1.22387		14.9491	696435		14.9491	546090		14.9491	150344
0.639712	1.16421		14.9659	692952		14.9659	545110		14.9659	147843
0.656547	1.04781		14.9827	696439		14.9827	550761		14.9827	145678
0.673382	1.03666		14.9996	691684		14.9996	548397		14.9996	143287
0.690216	1.0691		15.0164	684045		15.0164	542898		15.0164	141147
0.707051	1.08122		15.0333	674975		15.0333	535770		15.0333	139205
0.723885	1.08449		15.0501	675448		15.0501	535759		15.0501	139689
0.74072	1.08332		15.0669	675638		15.0669	535292		15.0669	140345
0.757554	1.08216		15.0838	675550		15.0838	534477		15.0838	141073
0.774389	1.07676		15.1006	672274		15.1006	531332		15.1006	140942
0.791223	1.06801		15.1174	667518		15.1174	526161		15.1174	141357
0.808058	1.00782		15.1343	669252		15.1343	526573		15.1343	142679
0.824892	0.970043		15.1511	672350		15.1511	528745		15.1511	143605
0.841727	0.942343		15.1679	677518		15.1679	532767		15.1679	144751
0.858562	0.812827		15.1848	665559		15.1848	522998		15.1848	142561
0.875396	0.753911		15.2016	665150		15.2016	522311		15.2016	142838
0.892231	0.785229		15.2184	665450		15.2184	522037		15.2184	143412
0.909065	0.815283		15.2353	626181		15.2353	490144		15.2353	136036
0.9259	0.824698		15.2521	651997		15.2521	509527		15.2521	142470
0.942734	0.772589		15.2689	653229		15.2689	509488		15.2689	143741
0.959569	0.72048		15.2858	654349		15.2858	509286		15.2858	145062
0.976403	0.736056		15.3026	648073		15.3026	502795		15.3026	145277
0.993238	0.739279		15.3194	649336		15.3194	501966		15.3194	147370
1.01007	0.729289		15.3363	635064		15.3363	489473		15.3363	145591
1.02691	0.719299		15.3531	621608		15.3531	479861		15.3531	141746
1.04374	0.689242		15.3699	625466		15.3699	484302		15.3699	141164
1.06058	0.678907		15.3868	628471		15.3868	486738		15.3868	141733
1.07741	0.668571		15.4036	630431		15.4036	489001		15.4036	141430
1.09424	0.64536		15.4205	629854		15.4205	488696		15.4205	141158
1.11108	0.657425		15.4373	631987		15.4373	489664		15.4373	142324
1.12791	0.634156		15.4541	621702		15.4541	480837		15.4541	140865
1.14475	0.610887		15.471	624236		15.471	481405		15.471	142831
1.16158	0.537889		15.4878	627232		15.4878	483109		15.4878	144123
1.17842	0.49185		15.5046	625815		15.5046	480710		15.5046	145106
1.19525	0.516998		15.5214	625569		15.5214	477803		15.5214	147766
1.21209	0.512271		15.5383	607117		15.5383	461456		15.5383	145661
1.22892	0.507545		15.5551	614052		15.5551	465006		15.5551	149046
1.24576	0.494389		15.572	610587		15.572	461098		15.572	149489
1.26259	0.44918		15.5888	607947		15.5888	458944		15.5888	149003
1.27943	0.43954		15.6056	594626		15.6056	448980		15.6056	145646
1.29626	0.407052		15.6225	597618		15.6225	450248		15.6225	147371
1.31309	0.416133		15.6393	591372		15.6393	444382		15.6393	146990
1.32993	0.469481		15.6561	589644		15.6561	441489		15.6561	148156
1.34676	0.472141		15.673	580841		15.673	433155		15.673	147687
1.3636	0.480203		15.6898	585442		15.6898	435134		15.6898	150308
1.38043	0.469429		15.7066	574145		15.7066	424584		15.7066	149561
1.39727	0.458655		15.7235	560434		15.7235	411734		15.7235	148700
1.4141	0.422871		15.7403	566772		15.7403	414144		15.7403	152628
1.43094	0.420514		15.7571	574202		15.7571	418238		15.7571	155964
1.44777	0.404312		15.774	574091		15.774	418527		15.774	155564
1.4646	0.388111		15.7908	569274		15.7908	416184		15.7908	153090
1.48144	0.421511		15.8076	574395		15.8076	419453		15.8076	154942
1.49827	0.413223		15.8245	580595		15.8245	422223		15.8245	158372
1.51511	0.404935		15.8413	554435		15.8413	402312		15.8413	152123
1.53194	0.381582		15.8582	557909		15.8582	403945		15.8582	153964
1.54878	0.342097		15.875	555258		15.875	400738		15.875	154520
1.56561	0.330032		15.8918	567891		15.8918	408236		15.8918	159655
1.58245	0.317967		15.9086	550687		15.9086	393892		15.9086	156795
1.59928	0.291954		15.9255	557975		15.9255	396468		15.9255	161507
1.61612	0.344471		15.9423	564421		15.9423	398271		15.9423	166150
1.63295	0.381334		15.9591	566047		15.9591	397687		15.9591	168360
1.64979	0.385448		15.976	550741		15.976	386584		15.976	164157
1.66662	0.385988		15.9928	549150		15.9928	386247		15.9928	162902
1.68345	0.331935		16.0097	552048		16.0097	387584		16.0097	164464
1.70029	0.277881		16.0265	526397		16.0265	367808		16.0265	158589
1.71712	0.263968		16.0433	530276		16.0433	369014		16.0433	161262
1.73396	0.274546		16.0602	525195		16.0602	364184		16.0602	161011
1.75079	0.266658		16.077	528732		16.077	365215		16.077	163516
1.76763	0.258771		16.0938	521679		16.0938	358866		16.0938	162813
1.78446	0.232419		16.1107	526825		16.1107	360933		16.1107	165892
1.8013	0.207731		16.1275	492292		16.1275	336208		16.1275	156084
1.81813	0.233076		16.1443	491623		16.1443	334995		16.1443	156628
1.83496	0.242654		16.1612	505785		16.1612	345879		16.1612	159906
1.8518	0.281183		16.178	511880		16.178	351687		16.178	160193
1.86864	0.295978		16.1948	517094		16.1948	355883		16.1948	161211
1.88547	0.279262		16.2117	482465		16.2117	332804		16.2117	149662
1.9023	0.262546		16.2285	490163		16.2285	338890		16.2285	151274
1.91914	0.260905		16.2453	497356		16.2453	343957		16.2453	153399
1.93597	0.259265		16.2622	512736		16.2622	354264		16.2622	158473
1.95281	0.254378		16.279	476540		16.279	328872		16.279	147668
1.96964	0.232647
1.98648	0.2089
2.00331	0.217917
2.02014	0.236538
2.03698	0.239976
2.05382	0.298946
2.07065	0.347332
2.08748	0.346994
2.10432	0.346656
2.12115	0.238495
2.13799	0.187224
2.15482	0.146372
2.17166	0.164173
2.18849	0.194062
2.20533	0.196179
2.22216	0.180779
2.239	0.165378
2.25583	0.159337
2.27266	0.16791
2.2895	0.17045
2.30633	0.15715
2.32317	0.143851
2.34	0.131344
2.35684	0.139627
2.37367	0.141609
2.39051	0.143591
2.40734	0.149104
2.42417	0.137424
2.44101	0.125745
2.45784	0.090835
2.47468	0.096212
2.49151	0.143202
2.50835	0.146243
2.52518	0.147014
2.54202	0.140735
2.55885	0.134456
2.57569	0.181092
2.59252	0.177977
2.60935	0.174862
2.62619	0.166214
2.64302	0.150326
2.65986	0.134438
2.67669	0.098459
2.69353	0.077926
2.71036	0.105726
2.7272	0.099347
2.74403	0.092968
2.76087	0.07096
2.7777	0.05944
2.79454	0.083554
2.81137	0.092825
2.8282	0.09166
2.84504	0.090495
2.86187	0.058875
2.87871	0.094043
2.89554	0.088052
2.91238	0.082061
2.92921	0.068109
2.94605	0.098038
2.96288	0.082318
2.97972	0.066597
2.99655	0.029644
3.01338	0.037955
3.03022	0.057639
3.04705	0.077322
3.06389	0.071775
3.08072	0.066228
3.09756	0.029881
3.11439	0.044823
3.13123	0.050236
3.14806	0.085383
3.1649	0.099265
3.18173	0.098619
3.19856	0.097973
3.2154	0.094822
3.23223	0.039784
3.24907	0.037521
3.2659	0.069366
3.28274	0.077572
3.29957	0.085778
3.31641	0.104656
3.33324	0.186016
3.35007	0.169291
3.36691	0.152565
3.38374	0.095114
3.40058	0.062999
3.41741	0.068418
3.43425	0.071006
3.45108	0.073595
3.46792	0.141762
3.48475	0.143802
3.50159	0.14491
3.51842	0.145552
3.53525	0.142635
3.55209	0.139718
3.56892	0.133242
3.58576	0.114388
3.60259	0.076707
3.61943	0.038267
3.63626	0.026478
3.6531	0.019605
3.66993	0.012732
3.68677	-0.01118
3.7036	-0.0179
3.72044	-0.00041
3.73727	0.017079
3.7541	0.030153
3.77094	0.034054
3.78777	0.034627
3.80461	0.016727
3.82144	-0.00117
3.83828	-0.02718
3.85511	-0.01171
3.87195	0.013931
3.88878	0.010734
3.90562	0.007538
3.92245	-0.00191
3.93928	0.01367
3.95612	0.02703
3.97295	0.018666
3.98979	0.010301
4.00662	-0.00688
4.02346	-0.00359
4.04029	0.00872
4.05713	0.021027
4.07396	0.02954
4.09079	0.029228
4.10763	0.028916
4.12446	0.046655
4.1413	0.031494
4.15813	0.016333
4.17497	0.013562
4.1918	0.01101
4.20864	0.008459
4.22547	-0.00576
4.24231	0.005404
4.25914	0.010528
4.27597	0.006787
4.29281	0.003046
4.30964	-0.01645
4.32648	-0.02704
4.34331	-0.03427
4.36015	-0.05527
4.37698	-0.04381
4.39382	-0.00973
4.41065	-0.00898
4.42749	-0.00444
4.44432	-0.01462
4.46115	-0.0248
4.47799	-0.02963
4.49482	-0.03291
4.51166	-0.01917
4.52849	-0.01508
4.54533	-0.011
4.56216	-0.00449
4.579	-0.00482
4.59583	-0.00515
4.61267	-0.01042
4.6295	-0.01568
4.64633	-0.02921
4.66317	-0.0488
4.68	-0.03411
4.69684	-0.02937
4.71367	-0.02907
4.73051	-0.02877
4.74734	-0.0247
4.76418	-0.02296
4.78101	-0.02122
4.79785	-0.01955
4.81468	-0.01987
4.83151	-0.02019
4.84835	-0.02597
4.86518	-0.0334
4.88202	-0.00422
4.89885	-0.00268
4.91569	-0.00259
4.93252	-0.0025
4.94936	-0.01889
4.96619	-0.01382
4.98303	-0.01207
4.99986	-0.00871
5.0167	-0.01092
5.03353	-0.01313
5.05036	-0.02092
5.0672	-0.01092
5.08403	-0.01332
5.10087	-0.01573
5.1177	-0.02855
5.13454	-0.01142
5.15137	-0.0075
5.16821	-0.00756
5.18504	-0.00762
5.20188	-0.0093
5.21871	-0.01098
5.23555	-0.05202
5.25238	-0.05024
5.26921	-0.00557
5.28605	-0.0032
5.30288	-0.00083
5.31972	0.007756
5.33655	0.008148
5.35339	-0.00106
5.37022	-0.01026
5.38706	-0.00267
5.40389	0.007284
5.42073	0.011745
5.43756	0.01006
5.45439	0.008375
5.47123	0.008148
5.48806	0.008368
5.5049	0.008589
5.52173	0.006733
5.53857	0.004877
5.5554	0.000409
5.57224	-0.02292
5.58907	-0.01341
5.6059	0.002545
5.62274	0.009768
5.63957	0.012574
5.65641	0.011077
5.67324	0.00958
5.69008	0.00378
5.70691	-0.01395
5.72375	-0.01394
5.74058	0.008643
5.75742	0.033134
5.77425	0.033424
5.79108	0.014007
5.80792	-0.00541
5.82475	-0.00241
5.84159	-0.00118
5.85842	-0.00081
5.87526	-0.00088
5.89209	-0.00095
5.90893	0.005328
5.92576	0.006615
5.9426	0.004968
5.95943	0.003322
5.97626	0.014473
5.9931	0.019383
6.00993	0.013191
6.02677	0.006999
6.0436	0.02294
6.06044	0.032027
6.07727	0.033366
6.09411	0.029187
6.11094	0.025007
6.12778	0.027393
6.14461	0.028183
6.16144	0.032181
6.17828	0.053291
6.19511	0.074401
6.21195	0.069
6.22878	0.063598
6.24562	0.05134
6.26245	0.061354
6.27929	0.061879
6.29612	0.060636
6.31296	0.059394
6.32979	0.057741
6.34663	0.056088
6.36346	0.038796
6.38029	0.027237
6.39713	0.028717
6.41396	0.027852
6.4308	0.026988
6.44763	0.039857
6.46447	0.051797
6.4813	0.053541
6.49814	0.054473
6.51497	0.055406
6.53181	0.064463
6.54864	0.085451
6.56547	0.087989
6.58231	0.086279
6.59914	0.084569
6.61598	0.055404
6.63281	0.089799
6.64965	0.134092
6.66648	0.133838
6.68332	0.133584
6.70015	0.108435
6.71699	0.094039
6.73382	0.100594
6.75065	0.103535
6.76749	0.106476
6.78432	0.108606
6.80116	0.110735
6.81799	0.109637
6.83483	0.108538
6.85166	0.105303
6.8685	0.105365
6.88533	0.105428
6.90217	0.105162
6.919	0.120963
6.93583	0.136763
6.95267	0.159943
6.9695	0.156789
6.98634	0.153634
7.00317	0.145823
7.02001	0.16137
7.03684	0.183578
7.05368	0.224332
7.07051	0.219067
7.08735	0.213803
7.10418	0.199608
7.12101	0.207821
7.13785	0.211533
7.15468	0.205515
7.17152	0.199496
7.18835	0.216784
7.20519	0.237629
7.22202	0.237418
7.23886	0.237206
7.25569	0.229287
7.27252	0.253596
7.28936	0.273973
7.30619	0.282612
7.32303	0.296124
7.33986	0.308674
7.3567	0.328625
7.37353	0.351103
7.39037	0.375829
7.4072	0.379962
7.42404	0.438317
7.44087	0.473472
7.4577	0.48498
7.47454	0.498445
7.49137	0.502311
7.50821	0.535063
7.52504	0.565268
7.54188	0.570027
7.55871	0.626489
7.57555	0.661802
7.59238	0.672375
7.60922	0.682948
7.62605	0.724568
7.64288	0.773106
7.65972	0.792662
7.67655	0.830566
7.69339	0.862936
7.71022	0.929741
7.72706	1.02378
7.74389	1.04519
7.76073	1.10234
7.77756	1.14112
7.7944	1.19349
7.81123	1.28046
7.82806	1.30899
7.8449	1.36247
7.86173	1.44853
7.87857	1.52019
7.8954	1.58903
7.91224	1.65341
7.92907	1.74246
7.94591	1.83357
7.96274	1.92105
7.97958	1.98169
7.99641	2.0839
8.01324	2.1666
8.03008	2.21365
8.04691	2.35951
8.06375	2.4768
8.08058	2.57336
8.09742	2.66007
8.11425	2.74859
8.13109	2.90089
8.14792	3.06034
8.16476	3.206
8.18159	3.32552
8.19843	3.41431
8.21526	3.50532
8.23209	3.66661
8.24893	3.82428
8.26576	3.95782
8.2826	4.11216
8.29943	4.1999
8.31627	4.41384
8.3331	4.53369
8.34994	4.62474
8.36677	4.85452
8.3836	5.03277
8.40044	5.09806
8.41727	5.34837
8.43411	5.51794
8.45094	5.58587
8.46778	5.71418
8.48461	5.88682
8.50145	6.01884
8.51828	6.19706
8.53512	6.39218
8.55195	6.55941
8.56879	6.68357
8.58562	6.82837
8.60246	6.98537
8.61929	7.09993
8.63612	7.21139
8.65296	7.34697
8.66979	7.49184
8.68663	7.64463
8.70346	7.81607
8.7203	7.87451
8.73713	7.9742
8.75397	8.16093
8.7708	8.25622
8.78763	8.38991
8.80447	8.51123
8.8213	8.56095
8.83814	8.71669
8.85497	8.8589
8.87181	8.89283
8.88864	8.98197
8.90548	9.00176
8.92231	9.02156
8.93914	9.09919
8.95598	9.19176
8.97282	9.24206
8.98965	9.26258
9.00648	9.28061
9.02332	9.30241
9.04015	9.32078
9.05699	9.32388
9.07382	9.32369
9.09066	9.32351
9.10749	9.31191
9.12433	9.31436
9.14116	9.3081
9.15799	9.30185
9.17483	9.27523
9.19166	9.24862
9.2085	9.18859
9.22533	9.15313
9.24217	9.14417
9.259	9.13521
9.27584	9.01768
9.29267	8.95175
9.30951	8.93924
9.32634	8.87672
9.34318	8.78381
9.36001	8.68624
9.37684	8.6087
9.39368	8.53809
9.41051	8.40776
9.42735	8.33374
9.44418	8.16925
9.46102	8.09137
9.47785	8.05653
9.49469	7.98592
9.51152	7.85867
9.52835	7.68371
9.54519	7.50542
9.56202	7.32006
9.57886	7.21372
9.59569	7.12573
9.61253	7.02548
9.62936	6.91389
9.6462	6.8002
9.66303	6.67384
9.67987	6.53148
9.6967	6.37335
9.71354	6.20152
9.73037	6.08436
9.7472	5.94187
9.76404	5.81815
9.78087	5.66057
9.79771	5.54161
9.81454	5.41875
9.83138	5.28152
9.84821	5.12726
9.86505	5.0528
9.88188	4.94798
9.89871	4.80829
9.91555	4.71209
9.93238	4.53867
9.94922	4.43217
9.96605	4.29918
9.98289	4.18283
9.99972	4.10721
10.0166	4.01764
10.0334	3.91868
10.0502	3.79268
10.0671	3.69726
10.0839	3.58143
10.1007	3.4896
10.1176	3.37641
10.1344	3.27522
10.1512	3.19842
10.1681	3.15367
10.1849	3.07663
10.2017	3.00178
10.2186	2.90875
10.2354	2.81899
10.2522	2.73637
10.2691	2.66998
10.2859	2.62033
10.3027	2.55498
10.3196	2.52222
10.3364	2.45492
10.3532	2.41414
10.3701	2.39553
10.3869	2.31013
10.4038	2.22443
10.4206	2.18699
10.4374	2.14817
10.4543	2.11736
10.4711	2.03245
10.4879	2.00781
10.5048	1.97063
10.5216	1.93345
10.5384	1.88253
10.5553	1.85
10.5721	1.79531
10.5889	1.7464
10.6058	1.72581
10.6226	1.67382
10.6394	1.63858
10.6563	1.61353
10.6731	1.57201
10.6899	1.53657
10.7068	1.50286
10.7236	1.46993
10.7404	1.45813
10.7573	1.41254
10.7741	1.37704
10.791	1.33597
10.8078	1.28024
10.8246	1.26278
10.8415	1.25304
10.8583	1.2433
10.8751	1.20567
10.8919	1.16617
10.9088	1.11573
10.9256	1.09929
10.9425	1.09617
10.9593	1.09305
10.9761	1.03984
10.993	1.02961
11.0098	1.02646
11.0266	1.02332
11.0435	0.9829
11.0603	0.939512
11.0771	0.886456
11.094	0.885328
11.1108	0.884201
11.1276	0.866492
11.1445	0.843704
11.1613	0.81844
11.1781	0.803217
11.195	0.751805
11.2118	0.728713
11.2286	0.727102
11.2455	0.713459
11.2623	0.693437
11.2791	0.670252
11.296	0.673749
11.3128	0.677743
11.3297	0.667701
11.3465	0.657659
11.3633	0.604614
11.3802	0.60519
11.397	0.603221
11.4138	0.601251
11.4307	0.593781
11.4475	0.562678
11.4643	0.542965
11.4812	0.538775
11.498	0.534586
11.5148	0.517109
11.5317	0.495984
11.5485	0.504889
11.5653	0.502819
11.5822	0.500748
11.599	0.483596
11.6158	0.466134
11.6327	0.452223
11.6495	0.451024
11.6663	0.449825
11.6832	0.44186
11.7	0.453149
11.7169	0.452095
11.7337	0.451041
11.7505	0.437351
11.7674	0.418959
11.7842	0.411368
11.801	0.413333
11.8178	0.408357
11.8347	0.403381
11.8515	0.390949
11.8684	0.385142
11.8852	0.384288
11.902	0.383434
11.9189	0.37907
11.9357	0.371374
11.9525	0.380901
11.9694	0.383271
11.9862	0.380153
12.003	0.377035
12.0199	0.368342
12.0367	0.359649
12.0535	0.354009
12.0704	0.34837
12.0872	0.336517
12.104	0.337288
12.1209	0.343043
12.1377	0.348905
12.1545	0.347388
12.1714	0.34587
12.1882	0.318627
12.205	0.331819
12.2219	0.346399
12.2387	0.345873
12.2555	0.345346
12.2724	0.329714
12.2892	0.323446
12.3061	0.32736
12.3229	0.328537
12.3397	0.327261
12.3566	0.325985
12.3734	0.318326
12.3902	0.321338
12.4071	0.324351
12.4239	0.324458
12.4407	0.324565
12.4576	0.323545
12.4744	0.32241
12.4912	0.314569
12.5081	0.32167
12.5249	0.325565
12.5417	0.329185
12.5586	0.32913
12.5754	0.329076
12.5922	0.32385
12.6091	0.323977
12.6259	0.324105
12.6427	0.318664
12.6596	0.309071
12.6764	0.317745
12.6933	0.318613
12.7101	0.316979
12.7269	0.315344
12.7438	0.314046
12.7606	0.312748
12.7774	0.297008
12.7943	0.312638
12.8111	0.328073
12.8279	0.33497
12.8448	0.336008
12.8616	0.334118
12.8784	0.332227
12.8953	0.295032
12.9121	0.306566
12.9289	0.308596
12.9458	0.306193
12.9626	0.303791
12.9794	0.296843
12.9963	0.296057
13.0131	0.291866
13.0299	0.287964
13.0468	0.282069
13.0636	0.271898
13.0804	0.27705
13.0973	0.289693
13.1141	0.301288
13.131	0.297397
13.1478	0.293506
13.1646	0.275068
13.1814	0.27626
13.1983	0.277451
13.2151	0.284591
13.232	0.284675
13.2488	0.284759
13.2656	0.273288
13.2825	0.271872
13.2993	0.27142
13.3161	0.270968
13.333	0.275048
13.3498	0.290711
13.3666	0.291175
13.3835	0.306814
13.4003	0.326356
13.4171	0.33457
13.434	0.329046
13.4508	0.323523
13.4676	0.295885
13.4845	0.284112
13.5013	0.290934
13.5181	0.320896
13.535	0.333281
13.5518	0.334478
13.5686	0.317195
13.5855	0.299912
13.6023	0.296004
13.6191	0.295947
13.636	0.295107
13.6528	0.285391
13.6697	0.290218
13.6865	0.326798
13.7033	0.352004
13.7202	0.362023
13.737	0.372042
13.7538	0.373395
13.7707	0.385188
13.7875	0.384879
13.8043	0.384569
13.8212	0.372774
13.838	0.319226
13.8548	0.308942
13.8717	0.31554
13.8885	0.318627
13.9053	0.321714
13.9222	0.328182
13.939	0.338939
13.9558	0.36071
13.9727	0.384221
13.9895	0.383906
14.0063	0.383592
14.0232	0.366994
14.04	0.35976
14.0569	0.377817
14.0737	0.38246
14.0905	0.388341
14.1074	0.391307
14.1242	0.394273
14.141	0.4083
14.1579	0.436904
14.1747	0.444763
14.1915	0.466731
14.2084	0.470388
14.2252	0.474045
14.242	0.489303
14.2589	0.52643
14.2757	0.534047
14.2925	0.539611
14.3094	0.540884
14.3262	0.542158
14.343	0.544226
14.3599	0.556174
14.3767	0.570573
14.3935	0.573643
14.4104	0.592282
14.4272	0.61658
14.444	0.625221
14.4609	0.63804
14.4777	0.649663
14.4946	0.685789
14.5114	0.711319
14.5282	0.715219
14.545	0.719118
14.5619	0.75045
14.5787	0.752289
14.5955	0.754128
14.6124	0.775153
14.6292	0.808825
14.6461	0.811761
14.6629	0.814697
14.6797	0.831059
14.6966	0.83233
14.7134	0.833602
14.7302	0.863009
14.7471	0.877612
14.7639	0.882656
14.7807	0.898539
14.7976	0.912776
14.8144	0.918211
14.8312	0.936413
14.8481	0.945678
14.8649	0.955068
14.8817	0.977937
14.8986	0.978495
14.9154	0.978356
14.9322	0.978217
14.9491	0.983336
14.9659	0.990642
14.9827	0.998365
14.9996	0.99596
15.0164	0.993555
15.0333	0.985267
15.0501	0.99054
15.0669	0.992917
15.0838	0.995294
15.1006	0.999525
15.1174	1
15.1343	0.999766
15.1511	0.999532
15.1679	0.998589
15.1848	0.98531
15.2016	0.983257
15.2184	0.981203
15.2353	0.949958
15.2521	0.971397
15.2689	0.970895
15.2858	0.970392
15.3026	0.963388
15.3194	0.960536
15.3363	0.946907
15.3531	0.925711
15.3699	0.924823
15.3868	0.923935
15.4036	0.920493
15.4205	0.907627
15.4373	0.894762
15.4541	0.878994
15.471	0.876853
15.4878	0.874711
15.5046	0.869846
15.5214	0.860254
15.5383	0.839829
15.5551	0.834096
15.572	0.827666
15.5888	0.821236
15.6056	0.800144
15.6225	0.795106
15.6393	0.780041
15.6561	0.770132
15.673	0.761881
15.6898	0.75363
15.7066	0.736598
15.7235	0.712075
15.7403	0.711755
15.7571	0.711435
15.774	0.704602
15.7908	0.690321
15.8076	0.689804
15.8245	0.685229
15.8413	0.654427
15.8582	0.65335
15.875	0.648896
15.8918	0.644442
15.9086	0.627339
15.9255	0.625581
15.9423	0.623824
15.9591	0.619416
15.976	0.603051
15.9928	0.586657
16.0097	0.577865
16.0265	0.559794
16.0433	0.558797
16.0602	0.553363
16.077	0.547929
16.0938	0.530828
16.1107	0.528936
16.1275	0.502149
16.1443	0.496658
16.1612	0.498608
16.178	0.498221
16.1948	0.497835
16.2117	0.479494
16.2285	0.478444
16.2453	0.477393
16.2622	0.469923
16.279	0.439897
16.2958	0.43575
16.3127	0.433173
16.3295	0.430596
16.3464	0.428821
16.3632	0.427046
16.38	0.398773
16.3969	0.403798
16.4137	0.404965
16.4305	0.404577
16.4474	0.40419
16.4642	0.399798
16.481	0.386301
16.4979	0.380297
16.5147	0.376001
16.5315	0.371705
16.5484	0.352936
16.5652	0.351373
16.582	0.34981
16.5989	0.344562
16.6157	0.325642
16.6325	0.323192
16.6494	0.32286
16.6662	0.317192
16.683	0.311525
16.6999	0.2897
16.7167	0.289006
16.7335	0.287241
16.7504	0.285475
16.7672	0.274373
16.7841	0.270438
16.8009	0.256354
16.8177	0.261143
16.8346	0.26741
16.8514	0.26917
16.8682	0.265678
16.885	0.262186
16.9019	0.254507
16.9187	0.224808
16.9356	0.22151
16.9524	0.221643
16.9692	0.221648
16.9861	0.240174
17.0029	0.249601
17.0197	0.248198
17.0366	0.246795
17.0534	0.218906
17.0702	0.209439
17.0871	0.216861
17.1039	0.218279
17.1207	0.213473
17.1376	0.208667
17.1544	0.197637
17.1712	0.17475
17.1881	0.177645
17.2049	0.173104
17.2217	0.168564
17.2386	0.156792
17.2554	0.15136
17.2722	0.159579
17.2891	0.163149
17.3059	0.167657
17.3227	0.167979
17.3396	0.164468
17.3564	0.160956
17.3732	0.142997
17.3901	0.143066
17.4069	0.143135
17.4238	0.140438
17.4406	0.131831
17.4574	0.116501
17.4743	0.111076
17.4911	0.115674
17.5079	0.114829
17.5248	0.113983
17.5416	0.107242
17.5584	0.115926
17.5753	0.120239
17.5921	0.120451
17.6089	0.120357
17.6258	0.120263
17.6426	0.119863
17.6594	0.119528
17.6763	0.132769
17.6931	0.133649
17.7099	0.130597
17.7268	0.127544
17.7436	0.124063
17.7604	0.120582
17.7773	0.0946
17.7941	0.093516
17.8109	0.092431
17.8278	0.087924
17.8446	0.085482
17.8615	0.083932
17.8783	0.082381
17.8951	0.078724
17.912	0.0683
17.9288	0.070034
17.9456	0.071895
17.9625	0.065706
17.9793	0.059517
17.9961	0.053457
18.013	0.071716
18.0298	0.081588
18.0466	0.081476
18.0635	0.081364
18.0803	0.073025
18.0971	0.064425
18.114	0.060433
18.1308	0.058871
18.1476	0.05731
18.1645	0.05664
18.1813	0.058859
18.1981	0.059831
18.215	0.058281
18.2318	0.056732
18.2487	0.050155
18.2655	0.055979
18.2823	0.05635
18.2992	0.054444
18.316	0.052537
18.3328	0.049071
18.3497	0.049038
18.3665	0.049005
18.3833	0.04856
18.4002	0.046684
18.417	0.046396
18.4338	0.046109
18.4507	0.044702
18.4675	0.044663
18.4843	0.045304
18.5012	0.043066
18.518	0.040829
18.5348	0.031926
18.5517	0.03076
18.5685	0.034229
18.5853	0.04834
18.6022	0.046411
18.619	0.044482
18.6359	0.030464
18.6527	0.027947
18.6695	0.032749
18.6864	0.037147
18.7032	0.043429
18.72	0.047201
18.7369	0.050543
18.7537	0.052208
18.7705	0.04639
18.7874	0.040572
18.8042	0.038658
18.821	0.036743
18.8379	0.031862
18.8547	0.032899
18.8715	0.041168
18.8884	0.043173
18.9052	0.045178
18.922	0.055717
18.9389	0.057782
18.9557	0.056806
18.9725	0.055831
18.9894	0.047567
19.0062	0.046384
19.023	0.0463
19.0399	0.046217
19.0567	0.044611
19.0735	0.025941
19.0904	0.019428
19.1072	0.017539
19.1241	0.01825
19.1409	0.016066
19.1577	0.013882
19.1745	0.023584
19.1914	0.044317
19.2082	0.04281
19.2251	0.041303
19.2419	0.036499
19.2587	0.031095
19.2756	0.021977
19.2924	0.031176
19.3092	0.033949
19.3261	0.036723
19.3429	0.034477
19.3597	0.032231
19.3766	0.022973
19.3934	0.03215
19.4102	0.030646
19.4271	0.029142
19.4439	0.018089
19.4607	0.008313
19.4776	0.013409
19.4944	0.019825
19.5112	0.020491
19.5281	0.023295
19.5449	0.023866
19.5617	0.024438
19.5786	0.024641
19.5954	0.023661
19.6122	0.022681
19.6291	0.020378
19.6459	0.027868
19.6627	0.024977
19.6796	0.022086
19.6964	0.021299
19.7133	0.025633
19.7301	0.029967
19.7469	0.035965
19.7638	0.03483
19.7806	0.033695
19.7974	0.014159
19.8143	0.021832
19.8311	0.024205
19.8479	0.020104
19.8648	0.016003
19.8816	0.010784
19.8984	0.011592
19.9153	0.017529
19.9321	0.018442
19.9489	0.019354
19.9658	0.022745
19.9826	0.021424
19.9994	0.020103
20.0163	-0.00577
20.0331	-0.00392
20.0499	0.000631
20.0668	0.011926
20.0836	0.010984
20.1004	0.010042
20.1173	0.005202
20.1341	-0.00197
20.151	-0.00181
20.1678	0.001784
20.1846	0.005375
20.2015	0.00883
20.2183	0.00994
20.2351	0.011049
20.252	0.021135
20.2688	0.025463
20.2856	0.025531
20.3025	0.0256
20.3193	0.001596
20.3361	0.006212
20.353	0.00611
20.3698	0.006007
20.3866	0.002656
20.4035	-0.00076
20.4203	-0.00417
20.4371	-0.00246
20.454	0.011621
20.4708	0.011472
20.4876	0.011323
20.5045	0.010004
20.5213	-0.00387
20.5382	-0.01625
20.555	-0.00649
20.5718	-0.0033
20.5887	-0.00246
20.6055	-0.00486
20.6223	-0.00725
20.6392	-0.00938
20.656	0.00802
20.6728	0.005128
20.6897	0.002236
20.7065	-0.00443
20.7233	-0.00376
20.7402	-0.00518
20.757	-0.00659
20.7738	-0.00766
20.7907	-0.00639
20.8075	-0.00511
20.8243	-0.00434
20.8412	-0.00562
20.858	-0.00691
20.8748	-0.0052
20.8917	-0.0035
20.9085	-0.00134
20.9254	-0.0017
20.9422	-0.00206
20.959	0.006318
20.9759	0.007157
20.9927	0.005454
21.0095	0.00375
21.0264	0.002461
21.0432	0.001171
21.06	0.013685
21.0769	0.013616
21.0937	0.013546
21.1105	0.011063
21.1274	-0.00967
21.1442	-0.01898
21.161	-0.00613
21.1779	0.003371
21.1947	0.012868
21.2115	0.010372
21.2284	0.007876
21.2452	0.002654
21.262	-0.00598
21.2789	-0.0162
21.2957	-0.00033
21.3125	0.013606
21.3294	0.019034
21.3462	0.024462
21.363	0.053068
21.3799	0.074725
21.3967	0.074439
21.4136	0.074152
21.4304	0.022644
21.4472	-0.00056
21.4641	-0.00066
21.4809	-0.00214
21.4977	-0.00362
21.5145	-0.0066
21.5314	-0.00958
21.5482	-0.03055
21.5651	-0.02023
21.5819	-0.01617
21.5987	-0.01439
21.6156	-0.0126
21.6324	-0.00747
21.6492	0.002865
21.6661	0.0037
21.6829	0.005024
21.6997	0.003378
21.7166	0.001731
21.7334	-0.00027
21.7502	-0.00227
21.7671	-0.00695
21.7839	-0.00432
21.8007	-0.00325
21.8176	-0.00893
21.8344	-0.01461
21.8513	-0.01254
21.8681	0.00437
21.8849	0.010707
21.9017	0.006571
21.9186	0.002435
21.9354	-0.00803
21.9522	-0.00585
21.9691	-0.00563
21.9859	-0.00544
22.0028	-0.00525
22.0196	0.011466
22.0364	0.015593
22.0533	0.017004
22.0701	0.016612
22.0869	0.01622
22.1038	0.024935
22.1206	0.02747
22.1374	0.027933
22.1543	0.028396
22.1711	0.033217
22.1879	0.031201
22.2048	0.029184
22.2216	0.029133
22.2384	0.008598
22.2553	-0.01854
22.2721	-0.01675
22.2889	-0.0158
22.3058	-0.01485
22.3226	-0.01446
22.3394	-0.01559
22.3563	-0.01671
22.3731	-0.01262
22.3899	-0.00712
22.4068	-0.00651
22.4236	-0.00749
22.4404	-0.00848
22.4573	-0.01107
22.4741	-0.01135
22.491	-0.01116
22.5078	-0.01098
22.5246	-0.00576
22.5415	-0.00718
22.5583	-0.0086
22.5751	-0.00938
22.592	-0.00126
22.6088	0.008016
22.6256	-0.00037
22.6425	-0.00875
22.6593	-0.01444
22.6761	-0.01475
22.693	-0.01506
22.7098	-0.01663
22.7266	-0.01086
22.7435	-0.0079
22.7603	-0.00722
22.7771	-0.01007
22.794	-0.01292
22.8108	-0.00224
22.8276	-0.00198
22.8445	-0.00452
22.8613	-0.00705
22.8782	-0.01223
22.895	-0.00892
22.9118	-0.00562
22.9287	-0.00528
22.9455	-0.0056
22.9623	-0.00592
22.9792	-0.00916
22.996	-0.0154
23.0128	-0.02421
23.0297	-0.01634
23.0465	-0.01614
23.0633	-0.01594
23.0802	-0.01465
23.097	-0.01525
23.1138	-0.01584
23.1307	-0.02594
23.1475	-0.02549
23.1643	-0.01097
23.1812	-0.00935
23.198	-0.00774
23.2148	-0.00457
23.2317	-0.00336
23.2485	-0.00587
23.2654	-0.00838
23.2822	-0.00981
23.299	-0.01979
23.3159	-0.02648
23.3327	-0.02597
23.3495	-0.02286
23.3664	-0.01938
23.3832	-0.01804
23.4	-0.01925
23.4169	-0.02045
23.4337	-0.02806
23.4505	-0.02953
23.4674	-0.01903
23.4842	-0.01228
23.501	-0.01372
23.5179	-0.01516
23.5347	-0.02194
23.5515	-0.03164
23.5684	-0.03401
23.5852	-0.0111
23.602	-0.01075
23.6189	-0.01439
23.6357	-0.01802
23.6525	-0.01696
23.6694	-0.01678
23.6862	-0.0166
23.7031	-0.02335
23.7199	-0.01302
23.7367	-0.01219
23.7536	-0.01264
23.7704	-0.0131
23.7872	-0.01483
23.8041	-0.01805
23.8209	-0.01333
23.8377	-0.01247
23.8546	-0.01538
23.8714	-0.0183
23.8882	-0.02434
23.9051	-0.02709
23.9219	-0.02565
23.9387	-0.02421
23.9556	-0.02394
23.9724	-0.02554
23.9892	-0.02714
24.0061	-0.02782
24.0229	-0.02407
24.0397	-0.02309
24.0566	-0.02211
24.0734	-0.02113
24.0902	-0.0137
24.1071	-0.00346
24.1239	0.000342
24.1407	0.000298
24.1576	0.000253
24.1744	-0.00817
24.1913	-0.01994
24.2081	-0.02803
24.2249	-0.02374
24.2417	-0.02273
24.2586	-0.02379
24.2754	-0.02485
24.2922	-0.03989
24.3091	-0.0295
24.3259	-0.02422
24.3428	-0.01894
24.3596	-0.0147
24.3764	-0.01389
24.3933	-0.01308
24.4101	-0.00921
24.4269	-0.00883
24.4438	-0.01474
24.4606	-0.02064
24.4774	-0.01918
24.4943	-0.01906
24.5111	-0.01894
24.5279	-0.01457
24.5448	-0.01285
24.5616	-0.01337
24.5784	-0.01389
24.5953	-0.01192
24.6121	-0.01162
24.6289	-0.011
24.6458	-0.00631
24.6626	-0.00172
24.6794	-0.00456
24.6963	-0.0074
24.7131	-0.01516
24.7299	-0.00936
24.7468	-0.00782
24.7636	-0.00629
24.7805	0.003724
24.7973	0.002353
24.8141	0.000982
24.831	-0.00647
24.8478	-0.0254
24.8646	-0.02519
24.8815	-0.0252
24.8983	-0.02521
24.9151	-0.02669
24.932	-0.02669
24.9488	-0.02226
24.9656	-0.0185
24.9825	-0.01474
24.9993	-0.00583
25.0161	-0.00517
25.033	-0.00452
25.0498	0.006829
25.0666	0.00829
25.0835	0.008033
25.1003	0.007776
25.1171	-0.00293
25.134	-0.00796
25.1508	-0.00593
25.1676	-0.00522
25.1845	-0.00683
25.2013	-0.00845
25.2182	-0.01239
25.235	-0.01257
25.2518	-0.01275
25.2687	-0.0137
25.2855	-0.00988
25.3023	-0.00435
25.3192	-0.00283
25.336	-0.00349
25.3528	-0.00416
25.3697	-0.00702
25.3865	-0.01522
25.4033	-0.02236
25.4202	-0.03195
25.437	-0.02662
25.4538	-0.01097
25.4707	-0.00515
25.4875	-0.00669
25.5043	-0.00823
25.5212	-0.01404
25.538	-0.0105
25.5548	-0.0052
25.5717	-0.00356
25.5885	-0.00376
25.6054	-0.00395
25.6222	-0.01301
25.639	-0.00763
25.6559	-0.00551
25.6727	-0.0034
25.6895	0.00147
25.7064	0.002872
25.7232	-0.00382
25.74	-0.01051
25.7569	-0.0171
25.7737	-0.01771
25.7905	-0.01832
25.8074	-0.02206
25.8242	-0.01932
25.841	-0.01105
25.8579	-0.00787
25.8747	-0.0047
25.8915	-0.00419
25.9084	-0.00591
25.9252	-0.00764
25.942	-0.01235
25.9589	-0.00852
25.9757	-0.00657
25.9925	-0.00587
26.0094	-0.00517
26.0262	-0.00512
26.0431	-0.00508
26.0599	-0.00704
26.0767	-0.00773
26.0936	-0.00841
26.1104	-0.00637
26.1272	-0.0068
26.1441	-0.00724
26.1609	-0.01065
26.1777	-0.01251
26.1946	-0.01437
26.2114	-0.0204
26.2282	-0.00788
26.2451	0.003627
26.2619	0.005425
26.2787	0.00535
26.2956	0.005275
26.3124	-0.00389
26.3292	-0.00968
26.3461	-0.00979
26.3629	-0.01124
26.3797	-0.00856
26.3966	-0.0049
26.4134	-0.00581
26.4302	-0.00672
26.4471	-0.01558
26.4639	-0.01078
26.4808	-0.00769
26.4976	-0.00501
26.5144	-0.00787
26.5312	-0.01073
26.5481	-0.02103
26.5649	-0.01852
26.5817	-0.007
26.5986	0.000443
26.6154	0.007882
26.6323	0.009388
26.6491	0.006525
26.6659	0.003663
26.6828	-0.00173
26.6996	0.005194
26.7164	0.00499
26.7333	0.004786
26.7501	-0.00112
26.7669	-0.00689
26.7838	-0.01626
26.8006	-0.01185
26.8174	-0.00527
26.8343	-0.00354
26.8511	-0.00703
26.8679	-0.01052
26.8848	-0.00953
26.9016	-0.00933
26.9184	-0.01118
26.9353	-0.01303
26.9521	-0.0098
26.9689	0.003016
26.9858	0.003908
27.0026	0.004003
27.0194	0.004097
27.0363	-0.00114
27.0531	-0.00831
27.07	-0.01549
27.0868	-0.02257
27.1036	-0.01415
27.1205	-0.01285
27.1373	-0.01155
27.1541	-0.01181
27.171	-0.01208
27.1878	-0.01574
27.2046	-0.01599
27.2215	0.005363
27.2383	0.005813
27.2551	0.002896
27.272	-2.17e-05
27.2888	-0.01355
27.3056	-0.02095
27.3225	-0.01393
27.3393	-0.01242
27.3561	-0.0139
27.373	-0.01537
27.3898	-0.01921
27.4066	-0.01195
27.4235	-0.00547
27.4403	0.001802
27.4571	0.005259
27.474	0.000344
27.4908	-0.00457
27.5077	-0.01311
27.5245	-0.00283
27.5413	0.010657
27.5582	0.009636
27.575	0.008616
27.5918	0.002776
27.6087	0.000111
27.6255	-0.00657
27.6423	-0.00102
27.6592	-0.00029
27.676	-0.00173
27.6928	-0.00318
27.7097	-0.00315
27.7265	-0.00318
27.7433	-0.01432
27.7602	-0.0186
27.777	-0.01861
27.7938	-0.01158
27.8107	-0.00515
27.8275	-0.00209
27.8443	-0.00131
27.8612	-0.00166
27.878	-0.00201
27.8949	-0.00971
27.9117	0.000989
27.9285	0.004162
27.9454	0.001534
27.9622	-0.00109
27.979	-0.00631
27.9959	0.003976
28.0127	0.008931
28.0295	0.003242
28.0464	-0.00245
28.0632	-0.00381
28.08	0.016757
28.0969	0.017669
28.1137	0.016987
28.1305	0.016305
28.1474	-0.00055
28.1642	-0.00555
28.181	-0.00415
28.1979	-0.00436
28.2147	-0.00457
28.2315	-0.00688
28.2484	-0.00372
28.2652	0.00216
28.282	0.002023
28.2989	0.001885
28.3157	-0.00137
28.3326	-0.00038
28.3494	0.000604
28.3662	0.00466
28.3831	0.005944
28.3999	0.005576
28.4167	0.005207
28.4336	0.003187
28.4504	0.003865
28.4672	0.003842
28.4841	0.00382
28.5009	0.005068
28.5177	0.006316
28.5346	0.007963
28.5514	0.00508
28.5682	0.002198
28.5851	-0.0047
28.6019	-0.0054
28.6187	0.001289
28.6356	0.001863
28.6524	-0.00173
28.6692	-0.00532
28.6861	-0.00905
28.7029	0.002798
28.7197	0.007004
28.7366	0.006054
28.7534	0.005104
28.7703	0.00033
28.7871	0.003403
28.8039	0.003876
28.8208	0.000407
28.8376	-0.00306
28.8544	-0.00294
28.8712	-0.00281
28.8881	-0.00246
28.9049	-0.0021
28.9218	0.008059
28.9386	0.01442
28.9554	0.015454
28.9723	0.01418
28.9891	0.012907
29.0059	0.009983
29.0228	0.007877
29.0396	0.005771
29.0564	0.003704
29.0733	0.00879
29.0901	0.011078
29.1069	0.008852
29.1238	0.006625
29.1406	0.005362
29.1574	0.008013
29.1743	0.012527
29.1911	0.023014
29.2079	0.020949
29.2248	0.018883
29.2416	0.014512
29.2584	0.00904
29.2753	0.019849
29.2921	0.024792
29.3089	0.024872
29.3258	0.024952
29.3426	0.020169
29.3594	0.013389
29.3763	0.013248
29.3931	0.016527
29.41	0.017949
29.4268	0.018273
29.4436	0.01805
29.4605	0.017826
29.4773	0.002618
29.4941	0.003787
29.511	0.003754
29.5278	0.003721
29.5446	0.010676
29.5615	0.013887
29.5783	0.015156
29.5951	0.015162
29.612	0.015168
29.6288	0.013913
29.6456	0.002831
29.6625	0.017616
29.6793	0.022722

## Sheet: suppfig1_E_ATPase
ATPase (umol/mg/min)
nanodisc	detergent
7.61532	11.7202
6.61608	13.0224
7.01386	11.4472
	11.1484
	10.1281
	11.884

## Sheet: Suppl_fig1F_SSME_traces
	300	100	30	10	3	1	0.3	0.1	0.03	0.01	0.003	0
0	7.755e-05	3.70638e-06	-2.21389e-05	-1.10623e-05	3.32438e-05	-3.67798e-06	4.43204e-05	-3.32154e-05	7.39856e-06	-1.10623e-05	2.58595e-05	2.95517e-05
0.001	0.000464774	-5.91263e-06	-0.000107886	-4.0975e-05	0.000186054	-3.45203e-05	0.000216043	-0.000193257	8.77731e-05	1.07156e-05	0.000168523	0.00012929
0.002	0.0013748	-0.000113393	-0.000257624	-3.52219e-05	0.000469975	-0.000137526	0.000431188	-0.000523854	0.000375124	0.000168724	0.00054229	0.000224185
0.003	0.00278518	-0.000407093	-0.000407755	0.000122581	0.000778294	-0.000342969	0.000449637	-0.00092899	0.000935738	0.000333507	0.00114233	0.00013248
0.004	0.00455427	-0.000839345	-0.000476601	0.000499743	0.00105857	-0.000644695	0.000276786	-0.00131598	0.00174767	0.000113922	0.00177397	-0.000248485
0.005	0.00663549	-0.00127117	-0.000452215	0.00107161	0.00131339	-0.000989915	0.000203753	-0.00174715	0.00279085	-0.000619094	0.00215596	-0.000847974
0.006	0.00897649	-0.0016482	-0.00038568	0.00188156	0.00147892	-0.00131083	0.000362599	-0.00240583	0.00394754	-0.0015194	0.00208961	-0.00151484
0.007	0.0113826	-0.00196232	-0.00027817	0.00306794	0.00145183	-0.00155613	0.00053758	-0.0034101	0.0050133	-0.00226711	0.00158285	-0.00216997
0.008	0.0136229	-0.00208485	-0.000105097	0.00454121	0.00116683	-0.00161809	0.000445217	-0.00462001	0.00592596	-0.00292045	0.000814426	-0.00283888
0.009	0.0154526	-0.00186694	9.68499e-05	0.00581166	0.000600994	-0.00144791	5.40848e-05	-0.00571332	0.00674055	-0.00362984	-4.5346e-05	-0.00357686
0.01	0.016581	-0.00133572	0.000262654	0.00639141	-0.000251184	-0.00123208	-0.00042228	-0.00650524	0.00736621	-0.00437007	-0.000940043	-0.00432415
0.011	0.0168144	-0.000545396	0.000377209	0.00633311	-0.00134906	-0.00119913	-0.000807112	-0.00710803	0.00758833	-0.00498457	-0.00182896	-0.00483467
0.012	0.016217	0.000625006	0.000565957	0.00620261	-0.00261243	-0.00136925	-0.00119808	-0.00768894	0.00733089	-0.00534473	-0.00260416	-0.00494219
0.013	0.0150483	0.0023904	0.00104741	0.00653156	-0.00388795	-0.00151139	-0.00189939	-0.00823411	0.00670899	-0.00552621	-0.0031797	-0.00478732
0.014	0.0135173	0.00492123	0.0018983	0.00734499	-0.0048819	-0.00132218	-0.0030259	-0.00868407	0.00586956	-0.00577006	-0.00355298	-0.00453921
0.015	0.011705	0.00823124	0.00304561	0.00826928	-0.0053126	-0.000696646	-0.00424145	-0.00911293	0.0048694	-0.00619416	-0.0038003	-0.00415481
0.016	0.00972351	0.0121312	0.00445409	0.00898804	-0.00513303	0.000222219	-0.00506485	-0.0096195	0.00374298	-0.00665727	-0.00441654	-0.00363111
0.017	0.00783772	0.0162176	0.00611097	0.00938459	-0.00455968	0.0011498	-0.0052923	-0.0100569	0.0025961	-0.00696855	-0.00626931	-0.00314512
0.018	0.0063782	0.0199232	0.00793386	0.00949754	-0.00385534	0.0018529	-0.00504548	-0.0100545	0.00154761	-0.0071357	-0.0092746	-0.00276027
0.019	0.00552676	0.0228156	0.00972567	0.00950857	-0.00309782	0.00232849	-0.0046028	-0.0093747	0.000601649	-0.00735931	-0.0120883	-0.00234317
0.02	0.00526251	0.0247628	0.0111522	0.00960906	-0.00225725	0.00267949	-0.00413427	-0.00810896	-0.000408689	-0.00771481	-0.0135643	-0.00196237
0.021	0.0054681	0.0257655	0.0119484	0.00993445	-0.00137427	0.0028918	-0.00356749	-0.0065398	-0.00161765	-0.00796898	-0.0133794	-0.00207921
0.022	0.00601298	0.0258915	0.0121578	0.0106223	-0.000563157	0.00288307	-0.00283862	-0.00493911	-0.00289047	-0.00787256	-0.0116894	-0.00302811
0.023	0.00675455	0.0252993	0.0119962	0.0115186	6.92465e-05	0.0026801	-0.00209275	-0.00350032	-0.00400656	-0.00740517	-0.00897059	-0.00439505
0.024	0.00746617	0.0240805	0.0116208	0.0118501	0.000505059	0.0024425	-0.00153004	-0.00231942	-0.00489551	-0.00662053	-0.00591445	-0.00532892
0.025	0.00788925	0.0222267	0.0111309	0.0108085	0.000891463	0.0022469	-0.0012712	-0.00142534	-0.00551138	-0.00554539	-0.00323045	-0.00552067
0.026	0.00788573	0.0198767	0.0106687	0.00828743	0.00138939	0.00186711	-0.00134179	-0.000845051	-0.00575257	-0.00436146	-0.00137091	-0.0053962
0.027	0.00746191	0.0172849	0.0104202	0.00472458	0.00180682	0.000976433	-0.00166139	-0.000549324	-0.00558041	-0.00334414	-0.000357114	-0.00526826
0.028	0.00672085	0.014576	0.0104763	0.00068656	0.00168094	-0.000461455	-0.00213884	-0.000398786	-0.0051411	-0.00254879	4.15057e-05	-0.00485622
0.029	0.00581424	0.0118172	0.0108096	-0.00323087	0.000849005	-0.00212986	-0.00280036	-0.00026628	-0.00478385	-0.00183464	5.45314e-05	-0.00382972
0.03	0.00485506	0.009093	0.0113198	-0.00651428	-0.000350945	-0.00362438	-0.00372314	-0.000258322	-0.00486151	-0.00123945	-0.000188513	-0.00233006
0.031	0.00396228	0.00643293	0.011811	-0.009018	-0.00150656	-0.00481093	-0.00478086	-0.000706667	-0.00552359	-0.00105061	-0.000722554	-0.000759866
0.032	0.00341403	0.00389098	0.0121366	-0.0109405	-0.00247362	-0.00583154	-0.00558301	-0.00180454	-0.00668532	-0.00131528	-0.00159949	0.000676077
0.033	0.00350917	0.0015758	0.0123333	-0.0124432	-0.00326698	-0.00673835	-0.00577888	-0.00334607	-0.00810766	-0.00165526	-0.00253669	0.00210469
0.034	0.00432516	-0.000479679	0.0125072	-0.0135231	-0.00388112	-0.00742048	-0.00530336	-0.00485293	-0.00951036	-0.00163347	-0.00301056	0.00362783
0.035	0.0057613	-0.00232651	0.0126953	-0.0141773	-0.00419749	-0.0078408	-0.00432671	-0.00594068	-0.010648	-0.00105923	-0.00278658	0.0049858
0.036	0.00762865	-0.00395871	0.012804	-0.014498	-0.00404918	-0.00803463	-0.00318479	-0.00653942	-0.0113587	-0.000125622	-0.00206816	0.00580597
0.037	0.00964771	-0.00524232	0.0126956	-0.0146385	-0.0034541	-0.00794712	-0.00223798	-0.00670829	-0.011579	0.000769297	-0.0011465	0.00592141
0.038	0.0114844	-0.00598671	0.0123657	-0.0147419	-0.00264716	-0.00751148	-0.00158137	-0.00650326	-0.0113324	0.0014499	-0.000162551	0.00527653
0.039	0.0128432	-0.00608309	0.0118899	-0.0148351	-0.00182646	-0.00678984	-0.00110135	-0.00607202	-0.0106742	0.00200568	0.000825477	0.00388166
0.04	0.0135518	-0.00553284	0.011258	-0.014751	-0.00103708	-0.00594437	-0.000761743	-0.00559273	-0.0096676	0.00245127	0.00182962	0.00200126
0.041	0.0135751	-0.00437387	0.0104337	-0.014286	-0.00028014	-0.00518627	-0.000698373	-0.00507808	-0.00842774	0.002655	0.0029342	0.000165712
0.042	0.0130451	-0.00268355	0.00949455	-0.0135121	0.000397341	-0.00464847	-0.00112867	-0.00429305	-0.00703166	0.0026522	0.00405633	-0.00110691
0.043	0.0122188	-0.000606513	0.00860022	-0.0128042	0.0007549	-0.00433279	-0.00200319	-0.00294944	-0.00545934	0.00276651	0.00483185	-0.00156886
0.044	0.011255	0.00163572	0.00787254	-0.0123285	0.000392975	-0.0042102	-0.00289424	-0.00104092	-0.00376775	0.00328829	0.00492957	-0.00125333
0.045	0.0101498	0.00374025	0.00731535	-0.011607	-0.000947038	-0.00415345	-0.00343323	0.00110129	-0.00218646	0.00414255	0.00438422	-0.000245798
0.046	0.00889436	0.00539015	0.00688002	-0.0100251	-0.00325829	-0.00393958	-0.00356977	0.00306845	-0.00092589	0.00491095	0.00354993	0.0013913
0.047	0.00754415	0.00641397	0.0065934	-0.00765592	-0.00629723	-0.00351673	-0.00341672	0.00456196	-4.33852e-05	0.00521327	0.00279891	0.00341332
0.048	0.00619875	0.00688084	0.00651179	-0.00519056	-0.00968083	-0.00305771	-0.0031432	0.00541156	0.000331823	0.00499533	0.00235388	0.00539193
0.049	0.00498225	0.00694716	0.00665046	-0.00328093	-0.0130324	-0.002718	-0.00299838	0.00553098	-7.51828e-05	0.00438469	0.00231717	0.00687093
0.05	0.00396414	0.00664892	0.00697355	-0.00219897	-0.0160263	-0.0025352	-0.00320051	0.00493306	-0.00130688	0.0034905	0.00267429	0.00743386
0.051	0.00311181	0.00593578	0.00738533	-0.00192906	-0.0183759	-0.0025124	-0.003818	0.00387549	-0.00297293	0.00239284	0.00334137	0.00688095
0.052	0.00246806	0.00486821	0.00779859	-0.00232643	-0.0198946	-0.00264128	-0.0048649	0.00274432	-0.00458016	0.00123522	0.00423133	0.00544267
0.053	0.00235265	0.0036395	0.0081793	-0.00315954	-0.0205746	-0.00287921	-0.00629978	0.00171094	-0.00597714	0.000250734	0.00520652	0.0036971
0.054	0.00318467	0.0024101	0.00849015	-0.00431205	-0.0205977	-0.00319438	-0.00787103	0.000729649	-0.00719369	-0.000433391	0.00608209	0.0022294
0.055	0.00509552	0.0012829	0.00862857	-0.00598458	-0.020241	-0.00356321	-0.00921275	-0.000248765	-0.00798705	-0.000895939	0.00667157	0.00136595
0.056	0.00783245	0.000369303	0.00848619	-0.00828206	-0.0196299	-0.00392414	-0.0101227	-0.00121341	-0.00813378	-0.00121643	0.00683418	0.00120422
0.057	0.0109126	-0.00027532	0.0080834	-0.0107352	-0.0186954	-0.00423711	-0.0106337	-0.00211953	-0.00784242	-0.00135659	0.00652295	0.00174214
0.058	0.0137622	-0.000687133	0.00753457	-0.0126138	-0.017414	-0.00447634	-0.0108791	-0.00290435	-0.00740422	-0.00134665	0.00569536	0.00278692
0.059	0.0159225	-0.000892443	0.00692191	-0.0135119	-0.0159163	-0.00455125	-0.010945	-0.00349198	-0.00689332	-0.00138191	0.00429942	0.00391451
0.06	0.0172109	-0.000869246	0.00634517	-0.0134019	-0.014439	-0.00437501	-0.0108189	-0.0037775	-0.00638558	-0.00154463	0.00247183	0.00469215
0.061	0.0176031	-0.000618712	0.00592875	-0.0123822	-0.0131654	-0.00398364	-0.0104084	-0.00369485	-0.00611363	-0.00166561	0.000529884	0.00485594
0.062	0.0170981	-0.000207456	0.00572316	-0.0106879	-0.0120733	-0.00354147	-0.00966774	-0.00339706	-0.00624224	-0.00160596	-0.0012787	0.0043518
0.063	0.0157211	0.000264651	0.00573535	-0.00868175	-0.0110926	-0.00318995	-0.00881165	-0.00318236	-0.00658055	-0.00143567	-0.0028277	0.0032896
0.064	0.0134909	0.000695782	0.0059615	-0.00669306	-0.0103008	-0.00293382	-0.00815219	-0.00318475	-0.00676569	-0.0012219	-0.00402687	0.0018055
0.065	0.010407	0.000997749	0.00643198	-0.00514397	-0.00974319	-0.00276129	-0.00775556	-0.00342774	-0.0066394	-0.000785991	-0.0048254	3.36904e-05
0.066	0.00656705	0.00115619	0.00725571	-0.00452743	-0.0092036	-0.00282127	-0.0075237	-0.00401134	-0.00625469	8.21372e-05	-0.00522067	-0.00182288
0.067	0.0022657	0.00120868	0.00846452	-0.00507553	-0.00842207	-0.00339658	-0.00738019	-0.00495881	-0.00578688	0.00125712	-0.00520478	-0.00357591
0.068	-0.00207868	0.00114396	0.00989207	-0.00669038	-0.00747347	-0.00459549	-0.00726473	-0.00612294	-0.00549901	0.00244118	-0.00475178	-0.00511699
0.069	-0.00599665	0.000914266	0.0112728	-0.00912389	-0.00667843	-0.00617915	-0.00707398	-0.00727319	-0.00555037	0.00358382	-0.00396899	-0.00638495
0.07	-0.00893924	0.00051068	0.0123584	-0.0121807	-0.00623854	-0.00778052	-0.00671951	-0.00817717	-0.00581264	0.00471849	-0.0031201	-0.00748759
0.071	-0.0104044	4.24754e-05	0.0129614	-0.0157459	-0.00618645	-0.00914264	-0.00627319	-0.00878626	-0.00600214	0.00547223	-0.00235186	-0.00860084
0.072	-0.0102569	-0.000272337	0.0130403	-0.0196773	-0.00654384	-0.0101885	-0.00582552	-0.00927373	-0.00602871	0.00530755	-0.0015499	-0.00955105
0.073	-0.00884871	-0.000264678	0.012786	-0.0238696	-0.0073474	-0.0109436	-0.00532814	-0.00975902	-0.00600972	0.004151	-0.000569448	-0.00990241
0.074	-0.00676167	0.000130234	0.0124209	-0.0281565	-0.0085637	-0.011443	-0.00476616	-0.0101692	-0.00594036	0.00235295	0.00045359	-0.00962854
0.075	-0.00453754	0.000922431	0.011917	-0.0320162	-0.0100579	-0.0116989	-0.00422725	-0.0103811	-0.00568617	0.000198424	0.00121437	-0.00939308
0.076	-0.00260112	0.00201579	0.0111346	-0.0347993	-0.0116972	-0.0116893	-0.00373051	-0.010425	-0.00527288	-0.00226598	0.00160165	-0.00979678
0.077	-0.0012362	0.00320832	0.01007	-0.0362263	-0.0133904	-0.0114605	-0.00321072	-0.0104824	-0.00492241	-0.00489072	0.0017305	-0.0105654
0.078	-0.000585338	0.00431827	0.00880219	-0.0364089	-0.0149574	-0.0112493	-0.00275909	-0.0105953	-0.00485221	-0.00716669	0.00179739	-0.0109726
0.079	-0.000698601	0.00526389	0.00740064	-0.0356512	-0.0160763	-0.0113762	-0.00259897	-0.0106022	-0.00513812	-0.00864741	0.00196534	-0.0107527
0.08	-0.00154131	0.0060019	0.00594168	-0.034444	-0.0164849	-0.0119448	-0.0027804	-0.0103722	-0.00572526	-0.00941186	0.00226297	-0.010175
0.081	-0.00295868	0.00639462	0.00456286	-0.0334508	-0.0162036	-0.0127861	-0.00316159	-0.00989166	-0.00647112	-0.00978767	0.00261836	-0.00952932
0.082	-0.00473219	0.0062733	0.0034361	-0.033222	-0.0154094	-0.0137243	-0.00356488	-0.00920533	-0.00714306	-0.00983037	0.00284059	-0.00886487
0.083	-0.00664906	0.00559811	0.00265238	-0.0338861	-0.0142802	-0.0146976	-0.00386865	-0.00836233	-0.00745659	-0.00932172	0.00265997	-0.00817035
0.084	-0.00851015	0.00444187	0.00219145	-0.0352281	-0.0130707	-0.0156089	-0.00414009	-0.00747376	-0.0071537	-0.00822806	0.00200995	-0.00753742
0.085	-0.0101222	0.00292758	0.00194323	-0.0370259	-0.0120328	-0.0161721	-0.00454963	-0.00670301	-0.0061097	-0.00693472	0.00108116	-0.00703231
0.086	-0.0112382	0.00125206	0.00179302	-0.0392392	-0.0112424	-0.0160549	-0.00501583	-0.00610946	-0.00448572	-0.00590671	7.10495e-05	-0.00662568
0.087	-0.0116276	-0.000315996	0.00168113	-0.0419125	-0.0106399	-0.015256	-0.00524802	-0.00567397	-0.002727	-0.00531677	-0.00092893	-0.00630913
0.088	-0.011249	-0.00151208	0.00155477	-0.0449828	-0.0101896	-0.0141399	-0.00520629	-0.0053493	-0.00125862	-0.00509696	-0.00189261	-0.00609555
0.089	-0.0101891	-0.00210338	0.00142396	-0.0481733	-0.0099363	-0.012995	-0.00516577	-0.00498846	-0.000264738	-0.00508881	-0.00282184	-0.00590164
0.09	-0.00858097	-0.00197479	0.00142321	-0.0511731	-0.00998655	-0.0118244	-0.00528099	-0.004412	0.000249268	-0.00501721	-0.00370441	-0.00559631
0.091	-0.00665451	-0.00127582	0.00169517	-0.0541234	-0.0104103	-0.0106085	-0.00543699	-0.00344136	0.000399764	-0.00467213	-0.00460087	-0.00518729
0.092	-0.00464918	-0.000312054	0.00219884	-0.0576838	-0.0110924	-0.00949316	-0.00562256	-0.0018467	0.000331095	-0.00421561	-0.00565	-0.00490523
0.093	-0.00268306	0.000714354	0.00272919	-0.0623028	-0.0118728	-0.00868997	-0.00600436	0.000528244	8.10481e-05	-0.00388871	-0.00681059	-0.00495089
0.094	-0.000770666	0.00175959	0.00315754	-0.0677548	-0.012779	-0.00824756	-0.00649546	0.00364331	-0.000399714	-0.00351441	-0.00780463	-0.00513847
0.095	0.00102473	0.00282157	0.00347095	-0.0734339	-0.0139023	-0.00792818	-0.00679089	0.0072682	-0.00116904	-0.00285853	-0.00840239	-0.00509457
0.096	0.00250328	0.00383169	0.00366335	-0.0786782	-0.0151619	-0.00741522	-0.0069805	0.0110649	-0.00223421	-0.00226683	-0.00860979	-0.0047672
0.097	0.00356711	0.00465579	0.00379506	-0.0830355	-0.0163234	-0.00666314	-0.00754288	0.0146979	-0.00343113	-0.00216097	-0.00852578	-0.00449569
0.098	0.00441688	0.00520261	0.00399193	-0.0863872	-0.0172409	-0.00596321	-0.00862878	0.0178455	-0.00443869	-0.00220382	-0.00814088	-0.00460338
0.099	0.00529776	0.0054409	0.00429278	-0.0885692	-0.0179482	-0.00563838	-0.00982391	0.0202698	-0.00504388	-0.00176299	-0.00735183	-0.00505362
0.1	0.00627126	0.0053458	0.00461976	-0.0892211	-0.0183827	-0.0057842	-0.0105626	0.0218782	-0.00527697	-0.000762009	-0.00611737	-0.00555614
0.101	0.00727967	0.00491061	0.00487971	-0.0882683	-0.0182906	-0.00634042	-0.0105773	0.0224946	-0.00522833	0.000552785	-0.00452638	-0.00585288
0.102	0.00818667	0.004136	0.00504825	-0.0861016	-0.0175914	-0.00723626	-0.0100628	0.0217682	-0.00487441	0.00210307	-0.00273695	-0.00570555
0.103	0.00876837	0.00303805	0.00517987	-0.0832018	-0.0165435	-0.008386	-0.00940909	0.0194998	-0.00414124	0.00372411	-0.000956784	-0.00476265
0.104	0.00882892	0.00168697	0.00533135	-0.0798689	-0.0154664	-0.00964253	-0.00875794	0.0158806	-0.00308346	0.00499314	0.000515862	-0.00284811
0.105	0.00835883	0.000207705	0.00544178	-0.0762469	-0.0144814	-0.0108656	-0.00798535	0.011382	-0.00195716	0.00567	0.00146316	-0.000250352
0.106	0.00752406	-0.0012189	0.00537097	-0.0723507	-0.0135084	-0.0119825	-0.00712612	0.00651061	-0.00101519	0.00593474	0.00200265	0.00241467
0.107	0.00655528	-0.00242636	0.0051147	-0.0681863	-0.0124189	-0.0129099	-0.00644079	0.00170301	-0.000304156	0.00596209	0.00243873	0.00443086
0.108	0.00566745	-0.0033867	0.00479766	-0.0641112	-0.0111888	-0.0135187	-0.005994	-0.00258382	0.000228552	0.0056401	0.0029298	0.00533605
0.109	0.00499938	-0.00418838	0.00444267	-0.0606379	-0.00994531	-0.0137064	-0.00556203	-0.00594831	0.00057831	0.00494899	0.00349704	0.00513496
0.11	0.00455171	-0.00489235	0.00402352	-0.0577654	-0.00883099	-0.0135115	-0.00498219	-0.00825265	0.000681671	0.00417661	0.00426121	0.0041168
0.111	0.00422054	-0.0055242	0.00369602	-0.0550911	-0.00800026	-0.0131507	-0.00436373	-0.00959424	0.000520926	0.00361576	0.00536045	0.00266518
0.112	0.00406072	-0.00618122	0.00368599	-0.0523474	-0.00774894	-0.0128736	-0.00401325	-0.0102195	0.000148132	0.00335502	0.00666471	0.00104677
0.113	0.00438847	-0.00695563	0.00402302	-0.0494243	-0.00825813	-0.0127601	-0.00418035	-0.010471	-0.000408709	0.00335543	0.00786228	-0.000687911
0.114	0.00546121	-0.00776672	0.00457966	-0.0462889	-0.00929575	-0.0126376	-0.0048245	-0.0107119	-0.00114128	0.00346875	0.00909517	-0.00245241
0.115	0.00723889	-0.00838904	0.00524557	-0.043117	-0.0103698	-0.0122669	-0.00571197	-0.0112128	-0.0020008	0.00346532	0.011096	-0.00396381
0.116	0.00943476	-0.0086361	0.00598728	-0.0402175	-0.0110483	-0.0116145	-0.00667242	-0.0119858	-0.00291688	0.0032794	0.0138832	-0.00499309
0.117	0.0116782	-0.00848677	0.00675955	-0.0377741	-0.011117	-0.0108339	-0.00764587	-0.0128427	-0.00386382	0.00308581	0.0163248	-0.00565892
0.118	0.0137246	-0.00775779	0.00738336	-0.0357542	-0.0105978	-0.0100789	-0.0086647	-0.0135709	-0.0047723	0.00304958	0.0175096	-0.00620198
0.119	0.0155264	-0.00585961	0.00764718	-0.0339085	-0.00964901	-0.00943071	-0.00981239	-0.0139726	-0.00535694	0.00313473	0.0173861	-0.00658813
0.12	0.0171492	-0.00256203	0.00740701	-0.0318692	-0.00839784	-0.00889632	-0.0109417	-0.0139259	-0.00529662	0.0032189	0.0162505	-0.00674127
0.121	0.0186437	0.00147545	0.00660437	-0.0293845	-0.00695962	-0.00845794	-0.011622	-0.0134715	-0.00457528	0.00336066	0.0143158	-0.00688506
0.122	0.0199202	0.00533568	0.00540593	-0.0263275	-0.00550966	-0.00812922	-0.0116651	-0.0127189	-0.00340465	0.00377954	0.0117297	-0.0072878
0.123	0.020816	0.00843919	0.00415137	-0.0225201	-0.00416533	-0.00793239	-0.0114289	-0.0116657	-0.00196294	0.0044751	0.00864134	-0.00796309
0.124	0.0212346	0.0105852	0.00310607	-0.0177579	-0.00294697	-0.00789562	-0.0113203	-0.0102427	-0.000341095	0.00511308	0.00515093	-0.00872547
0.125	0.0210832	0.0117611	0.00239987	-0.0119277	-0.00195787	-0.00799101	-0.0113639	-0.0085624	0.00140599	0.00543847	0.00144704	-0.00936931
0.126	0.0202416	0.011938	0.00207253	-0.00517449	-0.00137058	-0.00805448	-0.0114701	-0.00695029	0.00311787	0.00556061	-0.00208922	-0.0098084
0.127	0.0186842	0.0110244	0.00204264	0.00181501	-0.00121049	-0.00793507	-0.0116246	-0.00565204	0.00453395	0.00570624	-0.00506644	-0.0101103
0.128	0.0165451	0.00892567	0.00214626	0.00782427	-0.00138926	-0.00762421	-0.0117433	-0.00468646	0.00558905	0.0059267	-0.0072827	-0.0104073
0.129	0.014112	0.00564469	0.00231269	0.0116745	-0.00183221	-0.00719835	-0.0117576	-0.0039968	0.00644253	0.00621934	-0.00873343	-0.0107342
0.13	0.0117412	0.00135944	0.00260643	0.0127631	-0.00247587	-0.0067789	-0.0117334	-0.00362029	0.00712011	0.00667329	-0.00947839	-0.0109573
0.131	0.00967996	-0.00360806	0.00308584	0.011013	-0.00327035	-0.00651689	-0.0116635	-0.00362447	0.00743304	0.00731112	-0.00952383	-0.0109297
0.132	0.00802524	-0.00886087	0.00371259	0.00665501	-0.00413928	-0.00657351	-0.0113156	-0.00387203	0.00729691	0.00806462	-0.00890356	-0.0106518
0.133	0.0068639	-0.0140239	0.00442452	0.000194454	-0.00498598	-0.00707888	-0.0104749	-0.00414059	0.00701851	0.008894	-0.00777661	-0.0102157
0.134	0.00630966	-0.0188452	0.00520855	-0.00769988	-0.00577192	-0.0080854	-0.00928664	-0.00444678	0.00713008	0.00981507	-0.00638848	-0.00974979
0.135	0.00639834	-0.0231437	0.006004	-0.0164103	-0.00648503	-0.00958916	-0.00818685	-0.00487219	0.00772672	0.0109133	-0.00500364	-0.00945177
0.136	0.00707136	-0.0266865	0.00670689	-0.0254697	-0.00712694	-0.011512	-0.00743211	-0.00522383	0.00835893	0.0121738	-0.00376863	-0.00953659
0.137	0.00819949	-0.0291629	0.00725808	-0.0344684	-0.00770801	-0.0136338	-0.00689365	-0.00515345	0.00874961	0.0133269	-0.00242649	-0.010113
0.138	0.00957847	-0.0303534	0.00753409	-0.0429955	-0.00818784	-0.0156247	-0.00634967	-0.00452688	0.00900004	0.0140178	-0.000446674	-0.0110819
0.139	0.0109821	-0.0303352	0.00739284	-0.0507277	-0.00848841	-0.0171921	-0.00578043	-0.00353945	0.00915508	0.0140409	0.00209232	-0.0121487
0.14	0.0122247	-0.0293493	0.00689208	-0.0574318	-0.0085263	-0.0181753	-0.00538035	-0.00249218	0.0092183	0.0133359	0.00429451	-0.013023
0.141	0.0131635	-0.0275852	0.00621493	-0.0630557	-0.0082843	-0.0185336	-0.00531686	-0.00161817	0.00952004	0.0118707	0.00528614	-0.0135928
0.142	0.0136639	-0.0252082	0.00549461	-0.0677898	-0.00784087	-0.0183692	-0.00553916	-0.00107899	0.0104259	0.0098015	0.0047868	-0.0138264
0.143	0.0136578	-0.0224145	0.00480604	-0.0716644	-0.00721613	-0.01787	-0.00597656	-0.000927965	0.0116438	0.00754028	0.00308137	-0.0136433
0.144	0.0132326	-0.0194182	0.00421925	-0.0744521	-0.00636371	-0.0171519	-0.00671474	-0.00115942	0.0123833	0.00532913	0.00066754	-0.01298
0.145	0.0125159	-0.016445	0.00379722	-0.0759994	-0.00534631	-0.0163191	-0.00774165	-0.0018168	0.0121309	0.00313091	-0.00203104	-0.0118828
0.146	0.011506	-0.0136732	0.00352044	-0.0760346	-0.00425051	-0.0155578	-0.00884045	-0.00286533	0.0108377	0.00116711	-0.00465479	-0.0104824
0.147	0.0101801	-0.0111722	0.00328042	-0.0740255	-0.00302542	-0.0149086	-0.00994553	-0.00416147	0.00855943	-0.000131449	-0.00681023	-0.00889574
0.148	0.00872118	-0.00895597	0.002961	-0.0696825	-0.00163443	-0.0140941	-0.0112207	-0.0056688	0.00530088	-0.00085723	-0.00813504	-0.00725817
0.149	0.00743707	-0.00698596	0.00256645	-0.0633848	-0.000153279	-0.0128305	-0.0126343	-0.00732668	0.00120214	-0.00141888	-0.00851396	-0.00580459
0.15	0.00653474	-0.00510273	0.00225126	-0.0561684	0.00147524	-0.0112486	-0.0139184	-0.00887059	-0.00330628	-0.00174757	-0.00810408	-0.00473538
0.151	0.00606793	-0.00313156	0.00214593	-0.0492892	0.0034307	-0.00972669	-0.0149553	-0.0101393	-0.00764357	-0.00150552	-0.00709375	-0.00402673
0.152	0.00597304	-0.00101121	0.00229403	-0.0435146	0.00565277	-0.00840075	-0.0157322	-0.0112284	-0.0113457	-0.000673116	-0.00553985	-0.00349352
0.153	0.0061646	0.00122163	0.0027144	-0.0387543	0.00785207	-0.00717771	-0.0161227	-0.0121579	-0.0141544	0.000583685	-0.00314626	-0.00302965
0.154	0.006591	0.00345467	0.00331153	-0.0343949	0.00976392	-0.00610005	-0.0160103	-0.0126765	-0.0159654	0.00223053	0.000589098	-0.00264284
0.155	0.00720171	0.00549144	0.00387878	-0.0297619	0.0112087	-0.00540991	-0.0154734	-0.012487	-0.0167716	0.00413623	0.00535207	-0.00234316
0.156	0.00798252	0.00709955	0.004334	-0.0242051	0.0121018	-0.00519251	-0.0147713	-0.0115422	-0.0166414	0.00579746	0.00988841	-0.00218657
0.157	0.00893653	0.00815372	0.00471188	-0.0172922	0.0124815	-0.00519451	-0.0141321	-0.0101474	-0.0157369	0.00678947	0.0131239	-0.00230532
0.158	0.00997562	0.00865964	0.00494761	-0.00910672	0.0124838	-0.00515183	-0.0136244	-0.00871691	-0.0142992	0.00718976	0.0146426	-0.00281484
0.159	0.0109804	0.00863823	0.00493549	-0.00015043	0.0122467	-0.00499739	-0.0132345	-0.0073614	-0.0125913	0.0070879	0.0144711	-0.0036419
0.16	0.0118724	0.00818696	0.00465665	0.00876554	0.0118113	-0.00468096	-0.012915	-0.00593956	-0.0108735	0.00626929	0.0128813	-0.00446773
0.161	0.0125638	0.00750731	0.00416194	0.0165763	0.0112068	-0.00407572	-0.0125315	-0.00450673	-0.00945472	0.00478336	0.010279	-0.00497819
0.162	0.013004	0.00669027	0.00360021	0.0225207	0.0106072	-0.00315242	-0.0118603	-0.00337811	-0.00858781	0.00311679	0.00712513	-0.00504791
0.163	0.0132342	0.00571835	0.00319824	0.0265623	0.0102255	-0.00203359	-0.0107406	-0.00272504	-0.00823494	0.00165428	0.00382326	-0.00466425
0.164	0.0133804	0.00465147	0.00311619	0.0287891	0.0100992	-0.000737056	-0.00912525	-0.0024088	-0.00811918	0.000522012	0.000721683	-0.00387945
0.165	0.0136578	0.003548	0.00333527	0.0288353	0.0100911	0.000843534	-0.00701596	-0.00224369	-0.00803065	-0.000175755	-0.00181648	-0.00280093
0.166	0.014242	0.00238457	0.0036706	0.0263783	0.0100424	0.00262706	-0.00468048	-0.00226572	-0.00790778	-0.000392714	-0.00352651	-0.0014877
0.167	0.0151232	0.0011949	0.00392282	0.0215781	0.00988992	0.00436505	-0.00266711	-0.0027083	-0.00762928	-0.000230461	-0.00429892	1.84654e-05
0.168	0.0161547	0.000105573	0.00401336	0.0148436	0.00961018	0.00592435	-0.00122289	-0.00363608	-0.00706943	0.000312832	-0.00412117	0.00147933
0.169	0.0171626	-0.000785859	0.00395336	0.00680912	0.00918481	0.00732176	-5.93882e-05	-0.00471223	-0.00628978	0.00150648	-0.00318892	0.00252252
0.17	0.0180155	-0.00146304	0.00376671	-0.00168957	0.00868152	0.00850393	0.00113539	-0.00552797	-0.00538187	0.00355934	-0.00191054	0.00296359
0.171	0.0186263	-0.00194891	0.00346908	-0.0101439	0.00815482	0.00923364	0.00232569	-0.00592999	-0.00432198	0.00628254	-0.000727271	0.00281222
0.172	0.0189635	-0.00228495	0.00307589	-0.0186101	0.00755678	0.00934381	0.00333997	-0.00592009	-0.00312777	0.00927069	0.00013364	0.00207943
0.173	0.0190726	-0.00249828	0.00259888	-0.0271197	0.00680046	0.00889664	0.00406501	-0.00553652	-0.00193566	0.0121108	0.000759383	0.000862716
0.174	0.0189984	-0.00255582	0.00204821	-0.0350763	0.00577138	0.00802183	0.00442583	-0.00491057	-0.000797603	0.0143268	0.00115077	-0.000589195
0.175	0.018714	-0.00234151	0.00153319	-0.0415063	0.00438805	0.00691797	0.00447125	-0.0042553	0.000309816	0.0155245	0.00104647	-0.00202692
0.176	0.0181327	-0.0016875	0.00125573	-0.0456752	0.00265369	0.00589121	0.00440163	-0.00368105	0.00115228	0.015493	0.000299101	-0.00319403
0.177	0.0172287	-0.000464473	0.00131245	-0.0472304	0.000642784	0.00519169	0.00440716	-0.00313078	0.00130378	0.0140576	-0.000973414	-0.0037346
0.178	0.0161746	0.00136517	0.00164564	-0.0461196	-0.00143991	0.00484709	0.00446432	-0.00260212	0.000608804	0.011226	-0.00253051	-0.00329118
0.179	0.0152546	0.00368986	0.00217957	-0.0426263	-0.00327611	0.00465874	0.00435663	-0.00228408	-0.000722724	0.00748862	-0.00414758	-0.00166879
0.18	0.0146231	0.00624837	0.00291577	-0.0372777	-0.00458372	0.00440086	0.00397884	-0.00236697	-0.00235535	0.00350735	-0.00569646	0.00105452
0.181	0.014242	0.00873704	0.00386977	-0.0307614	-0.00526098	0.00393176	0.00351582	-0.0027927	-0.00391032	-0.000384571	-0.00702684	0.00453339
0.182	0.0140072	0.01085	0.00497622	-0.0240253	-0.00538207	0.00314522	0.00335029	-0.00324537	-0.00500913	-0.0039316	-0.00781	0.00834987
0.183	0.0138636	0.0123449	0.00612829	-0.0181691	-0.00504018	0.0019904	0.00385639	-0.00343201	-0.00547163	-0.00662973	-0.00779369	0.0120811
0.184	0.0138728	0.013149	0.00714398	-0.0140575	-0.00431828	0.000564634	0.00506447	-0.00333901	-0.00534718	-0.00802268	-0.00713279	0.0151465
0.185	0.01415	0.0132719	0.00774036	-0.0121028	-0.00339127	-0.000896233	0.00650251	-0.00315778	-0.00479941	-0.00800022	-0.00614112	0.016894
0.186	0.014677	0.0127009	0.0078059	-0.0123382	-0.0024678	-0.00220966	0.00757811	-0.00308745	-0.00412916	-0.00676516	-0.00485755	0.0169107
0.187	0.0152839	0.0114584	0.00748421	-0.0145175	-0.00165766	-0.00327901	0.00798154	-0.00319484	-0.003643	-0.00472828	-0.00320573	0.0152651
0.188	0.0158259	0.00969404	0.00696305	-0.0182564	-0.000974792	-0.00391698	0.00775106	-0.00322689	-0.00341665	-0.00242589	-0.00148773	0.0125699
0.189	0.0162479	0.00768365	0.0064182	-0.023164	-0.000421585	-0.00399344	0.0071197	-0.00256732	-0.0033388	-0.000339606	-0.000245323	0.00958759
0.19	0.0164937	0.00569439	0.00592211	-0.0287096	-6.11257e-05	-0.00370872	0.00622102	-0.000627513	-0.00318801	0.00123293	0.000323912	0.00668767
0.191	0.0164778	0.00388214	0.00539271	-0.0341376	9.41774e-06	-0.00332811	0.00508696	0.00270663	-0.00257179	0.00199998	0.000376998	0.0039051
0.192	0.016157	0.00230369	0.00484742	-0.0387441	-0.000238981	-0.00281143	0.0038701	0.00700164	-0.00100759	0.00160913	6.75234e-06	0.00134778
0.193	0.0155384	0.000957412	0.00447273	-0.042162	-0.000680712	-0.00200885	0.0027648	0.0114212	0.0018336	9.33971e-05	-0.00083794	-0.000731807
0.194	0.0146359	-9.11716e-05	0.00434619	-0.0443732	-0.00109449	-0.000986425	0.00178911	0.0149764	0.00585931	-0.00188506	-0.00208597	-0.00216381
0.195	0.0135051	-0.000708564	0.00441578	-0.0455198	-0.00143058	6.39879e-05	0.000869135	0.0168836	0.0103686	-0.00363307	-0.00338359	-0.00294517
0.196	0.0122695	-0.000904461	0.00472175	-0.0458647	-0.00188306	0.0010971	5.69367e-05	0.0168556	0.0143017	-0.00503449	-0.00435443	-0.00315124
0.197	0.0110191	-0.000795372	0.0053278	-0.0460244	-0.00256961	0.0022038	-0.000504723	0.0151268	0.0168009	-0.00630759	-0.00493792	-0.00296871
0.198	0.00971456	-0.00045739	0.00615794	-0.0468576	-0.00336139	0.00328979	-0.000727403	0.0121354	0.0174748	-0.00744181	-0.00524759	-0.00265693
0.199	0.00829136	1.18472e-05	0.00708166	-0.0488035	-0.00409823	0.00393915	-0.000589807	0.00818438	0.0163715	-0.00813968	-0.00535512	-0.00236005
0.2	0.00678627	0.000491202	0.00797336	-0.0514908	-0.00477014	0.00377499	-0.000128665	0.00356725	0.0138444	-0.00814894	-0.00533079	-0.00216338
0.201	0.00527587	0.00091851	0.00864274	-0.0540909	-0.00551267	0.00283578	0.000560024	-0.00115252	0.0103765	-0.0074169	-0.00521185	-0.0022067
0.202	0.00383295	0.00123565	0.00889596	-0.0558964	-0.00653367	0.00141962	0.00141177	-0.00535986	0.00649469	-0.00596596	-0.00493397	-0.00247938
0.203	0.00260184	0.00133059	0.00865054	-0.0565113	-0.00788251	-0.000214069	0.00243175	-0.00881349	0.00274694	-0.00387212	-0.00442801	-0.00273911
0.204	0.00175899	0.00113823	0.00793183	-0.055705	-0.00927371	-0.00182313	0.00359488	-0.0115875	-0.00037709	-0.00150303	-0.00376241	-0.00283425
0.205	0.0013766	0.000715118	0.00688176	-0.0533989	-0.0103439	-0.00323365	0.00469014	-0.0137633	-0.00265807	0.000587833	-0.00307333	-0.00289609
0.206	0.00145462	0.000165494	0.00576302	-0.0497071	-0.010955	-0.00449116	0.00534165	-0.015348	-0.0041619	0.00218731	-0.00238219	-0.00308613
0.207	0.00194764	-0.000436466	0.00479487	-0.0447487	-0.0110999	-0.00562241	0.0053535	-0.0163292	-0.00493074	0.0034105	-0.00161701	-0.00326927
0.208	0.00271611	-0.00102659	0.00404445	-0.0386214	-0.0107307	-0.00645153	0.00491785	-0.016818	-0.00486892	0.00428934	-0.000800426	-0.00318198
0.209	0.00362347	-0.00154018	0.00352075	-0.0314962	-0.00981142	-0.00693966	0.00434769	-0.0171095	-0.00398723	0.00478192	-0.000125435	-0.00285914
0.21	0.00455359	-0.00194123	0.00319167	-0.0235198	-0.00843292	-0.00731861	0.00374118	-0.0175392	-0.00261806	0.00483644	0.000194264	-0.00258746
0.211	0.00539789	-0.00220906	0.00295878	-0.0148451	-0.00681136	-0.00773612	0.0030034	-0.0182646	-0.00122772	0.00433175	0.000126056	-0.00250413
0.212	0.00615707	-0.00232965	0.00280642	-0.00563053	-0.005121	-0.00814146	0.00202631	-0.0191502	-4.77061e-05	0.00330893	-0.000186469	-0.00247776
0.213	0.00686966	-0.00233475	0.00284819	0.00409642	-0.00339229	-0.00845926	0.000744595	-0.0199341	0.000903167	0.00209752	-0.000552887	-0.00229847
0.214	0.00756809	-0.00227884	0.00314691	0.0142702	-0.00172727	-0.00859109	-0.000802044	-0.0204615	0.00151666	0.000989173	-0.00078966	-0.00182767
0.215	0.00835131	-0.00209337	0.00363539	0.0245009	-0.000369027	-0.00842905	-0.0023806	-0.0207019	0.00155599	6.84674e-06	-0.000674507	-0.00112672
0.216	0.0092387	-0.00154948	0.0042188	0.0341439	0.000599881	-0.00798125	-0.00369698	-0.0206167	0.000945785	-0.000857284	-2.1114e-05	-0.000526644
0.217	0.010014	-0.000497702	0.00483884	0.0426199	0.00131693	-0.00731199	-0.00456996	-0.0201428	-4.55721e-05	-0.00140391	0.0010158	-0.000432789
0.218	0.0103302	0.000930483	0.00535656	0.0495036	0.00192426	-0.00646761	-0.00490945	-0.0192396	-0.00105693	-0.0014611	0.00200865	-0.00097631
0.219	0.0100722	0.0024742	0.00555951	0.0542768	0.00258685	-0.00556026	-0.00470198	-0.0178907	-0.00192907	-0.00116079	0.00261684	-0.0019291
0.22	0.00962389	0.00397282	0.00538714	0.0562285	0.00351734	-0.00482684	-0.00398572	-0.0161712	-0.00254627	-0.00067634	0.00266738	-0.00301129
0.221	0.00955043	0.00531958	0.00494675	0.054828	0.00468258	-0.00459369	-0.00284401	-0.0142036	-0.00267871	0.000144576	0.00214958	-0.004061
0.222	0.0102219	0.00635094	0.00440084	0.0502181	0.00567397	-0.00503891	-0.0015453	-0.0120508	-0.00229224	0.00152168	0.00118332	-0.0048798
0.223	0.0119408	0.00692093	0.00392921	0.0432765	0.00605671	-0.00596348	-0.000494169	-0.00976955	-0.00170603	0.00318807	-4.78722e-05	-0.00522658
0.224	0.0149454	0.00696395	0.00362846	0.0350747	0.00573909	-0.00697979	9.94285e-05	-0.00745651	-0.00121905	0.00456228	-0.00128237	-0.00507665
0.225	0.0191196	0.00644498	0.00347853	0.0263583	0.00483685	-0.0078272	0.000356302	-0.00520259	-0.000914434	0.00557503	-0.00218947	-0.00471619
0.226	0.0240548	0.00536671	0.00346298	0.0177103	0.00339314	-0.00847723	0.0004577	-0.0031115	-0.000855819	0.00666887	-0.00246122	-0.00441175
0.227	0.0292724	0.00382357	0.00361438	0.00972114	0.00154846	-0.00906286	0.000378362	-0.00137944	-0.00105265	0.00783619	-0.00188759	-0.00416807
0.228	0.0342368	0.00202333	0.00394989	0.00265345	-0.000307781	-0.00971642	4.24395e-05	-0.000157932	-0.00131589	0.00842308	-0.000436069	-0.0039445
0.229	0.0384675	0.000197246	0.00439805	-0.00360122	-0.00183148	-0.0104101	-0.000337597	0.000627353	-0.0014302	0.00806132	0.0016368	-0.00371819
0.23	0.0416987	-0.0015486	0.00480665	-0.00914275	-0.00294135	-0.01089	-0.000393948	0.00111194	-0.00136491	0.00723032	0.00385964	-0.00325738
0.231	0.0438118	-0.00312439	0.00511271	-0.0140399	-0.00360574	-0.0109645	-0.000132003	0.00132339	-0.00129923	0.00654458	0.00578803	-0.00228168
0.232	0.0447347	-0.00432473	0.00542237	-0.0186422	-0.00365307	-0.0108397	0.000115785	0.00127876	-0.00147781	0.00592493	0.00715466	-0.000914837
0.233	0.0445016	-0.00501513	0.00586566	-0.0234712	-0.00299657	-0.0108726	0.000327452	0.000996805	-0.00197528	0.00502088	0.0078761	0.00033106
0.234	0.0432771	-0.00528382	0.00646502	-0.028721	-0.00181835	-0.0111094	0.000886339	0.000411599	-0.00265499	0.0040043	0.00800035	0.00106757
0.235	0.0412296	-0.00535021	0.00713469	-0.0342313	-0.000335084	-0.0113016	0.00196988	-0.000475963	-0.00337067	0.00336351	0.00768225	0.00132052
0.236	0.0384817	-0.00538999	0.0077745	-0.0398133	0.00136213	-0.0112449	0.00322957	-0.00141577	-0.00410429	0.00324502	0.00711182	0.00127373
0.237	0.0351901	-0.00545131	0.00832771	-0.0451275	0.00312338	-0.0108764	0.00422766	-0.00206867	-0.0047936	0.00344128	0.00636354	0.000948354
0.238	0.0315583	-0.00546687	0.00878884	-0.0495961	0.00463484	-0.0101873	0.0049021	-0.00231839	-0.00517763	0.00379486	0.00537809	0.000326888
0.239	0.027762	-0.00522203	0.009201	-0.0527708	0.005562	-0.00920647	0.00543619	-0.0023362	-0.00508699	0.00431816	0.00413068	-0.000383198
0.24	0.0239752	-0.00446617	0.00958416	-0.0544287	0.00568077	-0.00794835	0.00595982	-0.00230685	-0.00464534	0.00494952	0.00270932	-0.000902804
0.241	0.0204656	-0.00318186	0.0098369	-0.0543996	0.00491905	-0.00640976	0.00646124	-0.00227662	-0.00399079	0.00537216	0.00115075	-0.00121151
0.242	0.0175011	-0.00157899	0.00978039	-0.0526807	0.0034745	-0.00470306	0.00672247	-0.00228571	-0.0031927	0.00531035	-0.000607438	-0.00142681
0.243	0.0152339	0.000113717	0.00937352	-0.0495896	0.00182892	-0.00306105	0.00645818	-0.0023426	-0.00245507	0.0049167	-0.00252341	-0.00148587
0.244	0.0137408	0.00172692	0.00876924	-0.045674	0.0004405	-0.00160001	0.00570797	-0.002385	-0.00196552	0.0045589	-0.00435784	-0.0012236
0.245	0.0129559	0.00316598	0.00812647	-0.0414862	-0.000615573	-0.000228851	0.0047678	-0.00242132	-0.0017132	0.00437326	-0.00581152	-0.00054616
0.246	0.0126191	0.00440018	0.00747233	-0.037358	-0.00168514	0.00105539	0.00375763	-0.0025114	-0.00171789	0.00433958	-0.00668381	0.000465641
0.247	0.0124952	0.00534942	0.00675671	-0.0334352	-0.00306959	0.00205161	0.0026486	-0.00260392	-0.0021769	0.00464155	-0.00690026	0.0014972
0.248	0.0125662	0.00585086	0.00595199	-0.029907	-0.0045446	0.00267961	0.00158255	-0.00253246	-0.00321562	0.00553142	-0.00641232	0.00230286
0.249	0.0129385	0.00577059	0.00510738	-0.0269319	-0.00560841	0.00312748	0.000886479	-0.00212888	-0.00459179	0.00677031	-0.00520814	0.00291874
0.25	0.0136416	0.00506966	0.00438845	-0.0243673	-0.00608758	0.00358304	0.000763414	-0.00124706	-0.00581852	0.0077049	-0.00354984	0.00343077
0.251	0.014516	0.00383832	0.00391629	-0.0218792	-0.00624553	0.00400909	0.00111038	0.000308903	-0.0065952	0.00798477	-0.00189441	0.003824
0.252	0.015341	0.00228001	0.00361853	-0.0193116	-0.0063691	0.00429501	0.00175688	0.00272675	-0.00695593	0.00773416	-0.000486085	0.00403093
0.253	0.0160348	0.000623803	0.00341423	-0.0168509	-0.00641702	0.00446436	0.0026676	0.00590092	-0.00698871	0.00701524	0.000686163	0.00390304
0.254	0.0165517	-0.00087559	0.00330045	-0.0149086	-0.00617702	0.00455253	0.00365993	0.00929322	-0.00656596	0.00563077	0.00165868	0.00328018
0.255	0.016776	-0.00194349	0.00321437	-0.0138117	-0.00561747	0.00446173	0.00415966	0.0121991	-0.00539934	0.00366774	0.00246625	0.0021989
0.256	0.0166285	-0.00241914	0.00313561	-0.0135459	-0.0048108	0.00407385	0.00370562	0.014109	-0.00334828	0.00166148	0.00316782	0.000839363
0.257	0.0161097	-0.00231168	0.0032203	-0.0138206	-0.00366666	0.00343414	0.00253119	0.0147975	-0.000515838	-0.000109912	0.00373002	-0.000655694
0.258	0.0152855	-0.00169965	0.00354967	-0.0143465	-0.00209453	0.00280008	0.0011212	0.0142636	0.00301615	-0.00188043	0.00406328	-0.00217216
0.259	0.0142735	-0.000666443	0.00397865	-0.0149126	-0.000347151	0.00246291	-0.000504718	0.0127432	0.00712765	-0.00367825	0.00415788	-0.00354852
0.26	0.0131924	0.000655452	0.00439928	-0.0151296	0.00107041	0.00246047	-0.00261636	0.0106075	0.0113081	-0.00499302	0.00402382	-0.00456026
0.261	0.0121397	0.00206691	0.00482672	-0.0142194	0.00180872	0.00253522	-0.00519487	0.00813477	0.014792	-0.00546969	0.00365239	-0.00502869
0.262	0.0112469	0.0033618	0.00520283	-0.0112287	0.00180796	0.00247153	-0.00782317	0.00542815	0.0169636	-0.00540154	0.00313861	-0.00495805
0.263	0.0106977	0.00436814	0.00539149	-0.00564527	0.00116551	0.00236311	-0.00998651	0.00261097	0.0175405	-0.00523748	0.00270075	-0.00448765
0.264	0.0106005	0.0049952	0.00530056	0.00208054	3.82344e-05	0.00235329	-0.0113016	2.47335e-05	0.0166887	-0.00498204	0.00251766	-0.00376379
0.265	0.0109099	0.00523501	0.00490602	0.0106063	-0.00148011	0.0021988	-0.0116522	-0.00203139	0.0148748	-0.0043014	0.00262853	-0.00288203
0.266	0.011492	0.00509672	0.00424888	0.0182844	-0.00329236	0.00147209	-0.0112643	-0.00362878	0.0124044	-0.00299137	0.00297879	-0.00189065
0.267	0.0121032	0.0046726	0.0034422	0.0237981	-0.00508794	0.00014671	-0.0103964	-0.00489296	0.00932377	-0.00122096	0.00350273	-0.000882628
0.268	0.0124187	0.00421519	0.00266621	0.0263039	-0.0064813	-0.00139938	-0.00903434	-0.00556298	0.00586289	0.000550954	0.00419257	-6.2274e-05
0.269	0.0123056	0.00398102	0.00210453	0.0252465	-0.00730769	-0.00289209	-0.00712133	-0.00531346	0.00267807	0.00189863	0.00507967	0.000353517
0.27	0.0119013	0.00408191	0.00180574	0.020514	-0.00767699	-0.00445354	-0.00479732	-0.00426716	0.000420965	0.00266948	0.00618156	0.000382847
0.271	0.0113939	0.00458157	0.00168597	0.0126739	-0.0078115	-0.00631001	-0.00232733	-0.00276874	-0.000756239	0.0028385	0.00755274	0.000311984
0.272	0.0108797	0.00557037	0.00166447	0.00283213	-0.0078691	-0.00839202	1.89961e-05	-0.000942222	-0.00111607	0.00239944	0.00932397	0.000282548
0.273	0.0103747	0.00698541	0.00171874	-0.00761851	-0.00789114	-0.0104436	0.00201247	0.00116324	-0.000933265	0.00160728	0.0115511	4.37688e-05
0.274	0.00996811	0.00845926	0.00184013	-0.0174206	-0.00781528	-0.0122629	0.00341063	0.00324306	-0.000383406	0.000999618	0.014062	-0.000718173
0.275	0.0098032	0.0095291	0.00194938	-0.0259424	-0.00752363	-0.0136875	0.00395139	0.00490951	0.000267104	0.000888656	0.016547	-0.00194546
0.276	0.00975392	0.00991188	0.0019813	-0.0330591	-0.00696716	-0.0145698	0.00356511	0.00602874	0.000766637	0.00112506	0.018691	-0.00314692
0.277	0.00946186	0.00958501	0.00198101	-0.0387916	-0.00627175	-0.0148728	0.00254802	0.00662536	0.00119684	0.00154751	0.0202452	-0.00379686
0.278	0.00879426	0.00879851	0.00200643	-0.0433595	-0.00564631	-0.0146775	0.00132142	0.00663983	0.0017519	0.00222733	0.021091	-0.0037819
0.279	0.00795335	0.00785787	0.00211383	-0.047145	-0.00512583	-0.0139805	7.01706e-05	0.00605954	0.00228023	0.00307444	0.0212525	-0.00328308
0.28	0.00723359	0.00682425	0.00237871	-0.0503988	-0.00453118	-0.0126902	-0.00117843	0.00515603	0.00242299	0.00352984	0.0209378	-0.0024329
0.281	0.00687692	0.00555252	0.0028471	-0.053206	-0.00372805	-0.0109233	-0.00225941	0.00425272	0.00204529	0.0030208	0.0204734	-0.00135784
0.282	0.00698988	0.00389785	0.00347933	-0.0556515	-0.00276186	-0.00900934	-0.00295332	0.00335804	0.00135736	0.00174254	0.0200304	-0.00024322
0.283	0.00751151	0.00186943	0.00414373	-0.0578055	-0.00171961	-0.00718434	-0.00319053	0.0023188	0.000702335	0.000486081	0.0194971	0.000818107
0.284	0.00833485	-0.000330721	0.00478004	-0.0596544	-0.000593402	-0.00552658	-0.0029753	0.00116724	0.00024033	-0.000260895	0.0186538	0.00184054
0.285	0.00943919	-0.00241759	0.00542644	-0.0613146	0.000638916	-0.00413424	-0.0023131	5.83484e-05	-0.000124925	-0.000471171	0.0173712	0.00286128
0.286	0.0108719	-0.00410302	0.00604629	-0.0631598	0.00192042	-0.00310038	-0.00124185	-0.000949759	-0.000552605	-0.000190352	0.0156509	0.00383237
0.287	0.0126767	-0.00510843	0.00651701	-0.0655354	0.00313647	-0.0023763	3.49543e-05	-0.00179053	-0.00109061	0.000480897	0.0135742	0.00453526
0.288	0.0148328	-0.0052321	0.0067087	-0.0684063	0.00412548	-0.00184837	0.00107478	-0.00230607	-0.00161155	0.00122883	0.0112658	0.00484396
0.289	0.0172466	-0.00445316	0.00654482	-0.0711774	0.0047316	-0.0014013	0.00163156	-0.00243319	-0.00200095	0.00171114	0.00888795	0.00497742
0.29	0.0199327	-0.00293713	0.00605482	-0.0729532	0.00483933	-0.000892003	0.00216562	-0.00224674	-0.00243181	0.00191802	0.00651382	0.00522773
0.291	0.0231949	-0.000917686	0.00533554	-0.0729036	0.00442603	-0.000220224	0.00356608	-0.00183316	-0.00310246	0.00200948	0.00405602	0.00560691
0.292	0.0275548	0.00142894	0.00453778	-0.0702839	0.00362595	0.000652052	0.00650384	-0.00116416	-0.00383054	0.00196226	0.00149201	0.00596596
0.293	0.0334913	0.00409137	0.00391853	-0.064758	0.00256642	0.0016978	0.0114519	-9.00384e-05	-0.00426182	0.00180962	-0.000976143	0.006412
0.294	0.0412229	0.0072768	0.00368607	-0.0567039	0.00133044	0.00278487	0.0190774	0.00149273	-0.00425997	0.00187869	-0.00307477	0.00743038
0.295	0.0507104	0.0113905	0.00379	-0.0466213	0.000165976	0.00379739	0.0300247	0.00359674	-0.00395856	0.00245233	-0.00462618	0.00947398
0.296	0.0617681	0.0169924	0.00405976	-0.034578	-0.000644748	0.00472675	0.044356	0.00620194	-0.00354618	0.00338561	-0.00552564	0.0126573
0.297	0.0740949	0.0246114	0.0044203	-0.020467	-0.00103953	0.00555064	0.0615559	0.00919187	-0.00302586	0.00424698	-0.00572535	0.0170167
0.298	0.087262	0.0344603	0.00485908	-0.00435344	-0.00113557	0.00616739	0.0808453	0.0123317	-0.00233352	0.00489254	-0.00530804	0.0227886
0.299	0.100711	0.0463711	0.00532656	0.0135422	-0.00112557	0.00656975	0.101265	0.0153407	-0.00159614	0.00557738	-0.00437736	0.0303944
0.3	0.113914	0.0599254	0.00575952	0.0329349	-0.00115244	0.00699866	0.121791	0.0179398	-0.000948761	0.00631269	-0.00297213	0.0403071
0.301	0.126704	0.0745825	0.00611526	0.0533428	-0.00122017	0.0078014	0.141512	0.0198721	-0.000288887	0.00668178	-0.00125021	0.0528651
0.302	0.13942	0.0899136	0.00632889	0.0740251	-0.00125732	0.00937066	0.15988	0.0209206	0.000546568	0.00651855	0.000566444	0.0681693
0.303	0.152918	0.105898	0.00638748	0.0943848	-0.0011701	0.0123517	0.177167	0.0209907	0.00159395	0.00617937	0.00237129	0.0860284
0.304	0.168485	0.123028	0.00645139	0.114366	-0.000897826	0.0175482	0.194675	0.0201734	0.00283453	0.00605525	0.00408216	0.105811
0.305	0.187522	0.142179	0.00671818	0.134247	-0.00044687	0.0255561	0.214244	0.0187739	0.00424783	0.00625064	0.00566895	0.126445
0.306	0.21131	0.164274	0.00721146	0.154153	0.000229764	0.0365816	0.237461	0.0173055	0.00581491	0.00672547	0.00723956	0.146903
0.307	0.240714	0.189965	0.00782427	0.174066	0.00125497	0.0503713	0.26519	0.0162433	0.00762	0.00756484	0.00897225	0.166856
0.308	0.275724	0.219523	0.00845461	0.194341	0.00271937	0.0662088	0.297581	0.0158581	0.0099109	0.00894481	0.0112211	0.187002
0.309	0.315569	0.252806	0.00913464	0.215877	0.0046888	0.0831029	0.334246	0.0164257	0.0130073	0.0108099	0.0147431	0.208971
0.31	0.359332	0.289168	0.0102319	0.239757	0.00730978	0.100177	0.374302	0.0184424	0.0173383	0.0130736	0.0206663	0.234822
0.311	0.406231	0.327526	0.0124768	0.266732	0.0109695	0.116972	0.416525	0.0225837	0.0236814	0.016359	0.0302265	0.266398
0.312	0.455663	0.366646	0.0167381	0.296737	0.0164023	0.133439	0.459635	0.0295317	0.033051	0.0219469	0.0444696	0.304855
0.313	0.507406	0.405405	0.0237793	0.329059	0.0245791	0.149986	0.502337	0.0398337	0.0462182	0.0307397	0.0638433	0.350474
0.314	0.561766	0.442943	0.0340928	0.362893	0.036251	0.167613	0.54338	0.0537914	0.0634001	0.0429803	0.0879143	0.402631
0.315	0.619411	0.478831	0.0477807	0.39741	0.0513527	0.187702	0.581867	0.0712326	0.0841457	0.0592459	0.115475	0.459977
0.316	0.680974	0.513235	0.0644836	0.431904	0.0690332	0.211507	0.617431	0.0912952	0.107453	0.0806627	0.144828	0.521045
0.317	0.746669	0.546927	0.0834416	0.466044	0.0882597	0.239648	0.649965	0.112635	0.132061	0.107333	0.174282	0.584704
0.318	0.815997	0.581084	0.103684	0.499656	0.108101	0.271864	0.679095	0.133934	0.156563	0.13734	0.202734	0.649875
0.319	0.887546	0.616925	0.124337	0.532556	0.127638	0.307284	0.704243	0.154296	0.179664	0.168176	0.229983	0.715263
0.32	0.9592	0.655348	0.144972	0.5647	0.145969	0.344916	0.725228	0.173454	0.200937	0.198561	0.256772	0.779697
0.321	1.02873	0.696742	0.165673	0.596059	0.162599	0.383748	0.742341	0.191781	0.221357	0.228292	0.284522	0.842447
0.322	1.09416	0.740974	0.186859	0.626291	0.177933	0.422651	0.755992	0.210192	0.242946	0.257335	0.314715	0.903045
0.323	1.15395	0.787449	0.209223	0.654992	0.193181	0.460543	0.766664	0.229995	0.267705	0.286033	0.34833	0.96098
0.324	1.20736	0.835236	0.233583	0.682165	0.209858	0.496618	0.774904	0.252568	0.297031	0.315664	0.385634	1.0156
0.325	1.25468	0.883199	0.260484	0.707932	0.229383	0.530398	0.781169	0.278831	0.331993	0.348076	0.426299	1.06626
0.326	1.29706	0.930114	0.289998	0.731991	0.252763	0.561558	0.785804	0.308845	0.373105	0.384921	0.469659	1.11257
0.327	1.33575	0.974889	0.321793	0.753689	0.28041	0.589755	0.788834	0.342076	0.419681	0.427115	0.514938	1.15433
0.328	1.37061	1.01678	0.355236	0.772403	0.312151	0.614752	0.789348	0.37807	0.470168	0.474486	0.561352	1.19129
0.329	1.39887	1.05546	0.389568	0.787767	0.347259	0.636632	0.784965	0.416486	0.523095	0.525971	0.608192	1.22316
0.33	1.41512	1.09099	0.424126	0.799528	0.384553	0.655762	0.771881	0.456531	0.577284	0.580303	0.654972	1.24978
0.331	1.41273	1.12335	0.45837	0.807186	0.42272	0.67249	0.745514	0.496934	0.631389	0.636511	0.701335	1.2712
0.332	1.38592	1.15155	0.49186	0.809894	0.460672	0.687007	0.701646	0.536517	0.683939	0.693992	0.746792	1.28754
0.333	1.33143	1.17266	0.524454	0.806019	0.497598	0.69945	0.637687	0.574541	0.733884	0.752219	0.790702	1.29885
0.334	1.24883	1.18214	0.556333	0.792092	0.532788	0.709827	0.553495	0.610605	0.78065	0.810396	0.832455	1.30474
0.335	1.14006	1.17514	0.587805	0.763195	0.565588	0.717923	0.451557	0.644379	0.823676	0.867518	0.871547	1.30381
0.336	1.00868	1.14778	0.619208	0.715241	0.595528	0.723443	0.33658	0.675422	0.862241	0.922622	0.907691	1.29311
0.337	0.859456	1.09815	0.650813	0.646853	0.622404	0.726066	0.214551	0.703267	0.895837	0.974896	0.940761	1.26866
0.338	0.698056	1.02659	0.68282	0.559817	0.646208	0.724984	0.091571	0.727672	0.924446	1.02375	0.970509	1.22661
0.339	0.530396	0.935004	0.715408	0.458432	0.667136	0.718108	-0.0271782	0.74869	0.948182	1.06874	0.99652	1.1643
0.34	0.361777	0.826275	0.74859	0.348369	0.685684	0.701709	-0.138005	0.766424	0.966899	1.1094	1.01839	1.08096
0.341	0.196214	0.703901	0.782115	0.235546	0.702448	0.67126	-0.238773	0.780883	0.980564	1.14505	1.0357	0.978309
0.342	0.0363636	0.571711	0.81546	0.125255	0.71772	0.623292	-0.328934	0.792166	0.989587	1.17496	1.04787	0.860301
0.343	-0.116097	0.433412	0.847775	0.0216205	0.731436	0.556809	-0.409293	0.800431	0.994361	1.1986	1.05434	0.732287
0.344	-0.260065	0.292206	0.878071	-0.0727901	0.743504	0.473454	-0.481128	0.805677	0.994798	1.21586	1.0544	0.5999
0.345	-0.39474	0.150574	0.905468	-0.157165	0.753915	0.377076	-0.54536	0.807696	0.99048	1.22666	1.04672	0.468106
0.346	-0.519369	0.0103478	0.929188	-0.232297	0.76238	0.273125	-0.602265	0.805994	0.98081	1.23059	1.0288	0.340645
0.347	-0.633058	-0.126806	0.948268	-0.30017	0.767876	0.167589	-0.651504	0.79942	0.964415	1.22686	0.996891	0.21978
0.348	-0.734704	-0.25913	0.961027	-0.363348	0.768227	0.0658565	-0.692345	0.785573	0.938282	1.21371	0.946741	0.106194
0.349	-0.823084	-0.384902	0.964553	-0.424085	0.759797	-0.0279909	-0.724025	0.760842	0.897773	1.1873	0.875017	-0.000791576
0.35	-0.89706	-0.502431	0.954809	-0.483518	0.738009	-0.111635	-0.746001	0.721765	0.837883	1.14159	0.780544	-0.102346
0.351	-0.955775	-0.610076	0.927702	-0.541429	0.698709	-0.184746	-0.758036	0.666536	0.754965	1.07024	0.664742	-0.199015
0.352	-0.998727	-0.706484	0.880598	-0.596854	0.639606	-0.248754	-0.76039	0.595399	0.648194	0.968931	0.531483	-0.290172
0.353	-1.02572	-0.790713	0.813261	-0.648993	0.561188	-0.306054	-0.753933	0.510166	0.520378	0.836671	0.386493	-0.374301
0.354	-1.03688	-0.862092	0.727817	-0.697136	0.466573	-0.359052	-0.739918	0.41366	0.377291	0.676128	0.236337	-0.449591
0.355	-1.0329	-0.920063	0.62806	-0.740008	0.360581	-0.409631	-0.719758	0.309374	0.225889	0.493606	0.0874302	-0.514257
0.356	-1.0153	-0.964368	0.518609	-0.776126	0.248745	-0.458781	-0.695093	0.200988	0.073142	0.297999	-0.0548403	-0.566608
0.357	-0.98613	-0.995337	0.404212	-0.804726	0.136463	-0.506298	-0.667829	0.091841	-0.074442	0.098988	-0.186932	-0.605136
0.358	-0.947731	-1.01391	0.289103	-0.826005	0.028257	-0.551054	-0.639924	-0.0153876	-0.211682	-0.0944276	-0.307378	-0.628903
0.359	-0.902539	-1.02152	0.176473	-0.84065	-0.0727592	-0.591648	-0.612985	-0.118954	-0.335825	-0.274756	-0.416457	-0.638
0.36	-0.852766	-1.01991	0.068296	-0.849524	-0.165176	-0.626911	-0.588037	-0.21818	-0.446732	-0.436627	-0.515598	-0.63349
0.361	-0.800253	-1.01097	-0.0347333	-0.853761	-0.249177	-0.656023	-0.565708	-0.313066	-0.545918	-0.577648	-0.606408	-0.617163
0.362	-0.746592	-0.996502	-0.13302	-0.854728	-0.32584	-0.678366	-0.546447	-0.403524	-0.635489	-0.698751	-0.689767	-0.591405
0.363	-0.693197	-0.978152	-0.227342	-0.853606	-0.396284	-0.69346	-0.530379	-0.489025	-0.717373	-0.802849	-0.765754	-0.55894
0.364	-0.641246	-0.957239	-0.318231	-0.851183	-0.461273	-0.701209	-0.517207	-0.568836	-0.792605	-0.892663	-0.833866	-0.522515
0.365	-0.591663	-0.934768	-0.405819	-0.848183	-0.521149	-0.702205	-0.506483	-0.641999	-0.861001	-0.969758	-0.892729	-0.484699
0.366	-0.545112	-0.911664	-0.489803	-0.845342	-0.575756	-0.697663	-0.497892	-0.706985	-0.921429	-1.03503	-0.940304	-0.447733
0.367	-0.501967	-0.888902	-0.569522	-0.843281	-0.624498	-0.689066	-0.491312	-0.761815	-0.972269	-1.08904	-0.974773	-0.41339
0.368	-0.462394	-0.86733	-0.644107	-0.842615	-0.666644	-0.677963	-0.486647	-0.804604	-1.01162	-1.13161	-0.994994	-0.382927
0.369	-0.426347	-0.847457	-0.712635	-0.843837	-0.7015	-0.665752	-0.483563	-0.833932	-1.0375	-1.16171	-1.0007	-0.357048
0.37	-0.393538	-0.829419	-0.774266	-0.846977	-0.728497	-0.653453	-0.481546	-0.84905	-1.04858	-1.17832	-0.99256	-0.335944
0.371	-0.363512	-0.81315	-0.828336	-0.851581	-0.747569	-0.641804	-0.480212	-0.850163	-1.04475	-1.18106	-0.972053	-0.319522
0.372	-0.335752	-0.798535	-0.874396	-0.856989	-0.759337	-0.631398	-0.479377	-0.838464	-1.02682	-1.17004	-0.941143	-0.307484
0.373	-0.309847	-0.785342	-0.912249	-0.862544	-0.76486	-0.622668	-0.478821	-0.815821	-0.99607	-1.1458	-0.902049	-0.299304
0.374	-0.28562	-0.773219	-0.942019	-0.867606	-0.765455	-0.615885	-0.478206	-0.784476	-0.954524	-1.10973	-0.85707	-0.294286
0.375	-0.263138	-0.761854	-0.964234	-0.871509	-0.762607	-0.611071	-0.477272	-0.746852	-0.904895	-1.0641	-0.80855	-0.291599
0.376	-0.24263	-0.751084	-0.979762	-0.873658	-0.757679	-0.607961	-0.475995	-0.70536	-0.850029	-1.01136	-0.758818	-0.290328
0.377	-0.224326	-0.740765	-0.989631	-0.873777	-0.75171	-0.606284	-0.474498	-0.662403	-0.79261	-0.953666	-0.71002	-0.289679
0.378	-0.208366	-0.730579	-0.994949	-0.872046	-0.745486	-0.605956	-0.472816	-0.620323	-0.73519	-0.893431	-0.663918	-0.289079
0.379	-0.19478	-0.720146	-0.996874	-0.868856	-0.739582	-0.606822	-0.470763	-0.580982	-0.680051	-0.83337	-0.621695	-0.28816
0.38	-0.183424	-0.709201	-0.996447	-0.864421	-0.734355	-0.608473	-0.468147	-0.54554	-0.62887	-0.7756	-0.583889	-0.286856
0.381	-0.173973	-0.697536	-0.994432	-0.858806	-0.730051	-0.610404	-0.464994	-0.514727	-0.582565	-0.721229	-0.550621	-0.285408
0.382	-0.166015	-0.685032	-0.99134	-0.852256	-0.72689	-0.612154	-0.461322	-0.489023	-0.541512	-0.670948	-0.521824	-0.284059
0.383	-0.159171	-0.671679	-0.987599	-0.845143	-0.724971	-0.613419	-0.456947	-0.468444	-0.505862	-0.625529	-0.497209	-0.282868
0.384	-0.153192	-0.657584	-0.983645	-0.837585	-0.724136	-0.614189	-0.451773	-0.452401	-0.475654	-0.585418	-0.476297	-0.281753
0.385	-0.147935	-0.643102	-0.979761	-0.829605	-0.724056	-0.61458	-0.445983	-0.440098	-0.450767	-0.550255	-0.458598	-0.280519
0.386	-0.143273	-0.628656	-0.975976	-0.821708	-0.72448	-0.614529	-0.43983	-0.430934	-0.430774	-0.51939	-0.443636	-0.278982
0.387	-0.139029	-0.61443	-0.972239	-0.814603	-0.725288	-0.613834	-0.433434	-0.424321	-0.414769	-0.492816	-0.430892	-0.277181
0.388	-0.134999	-0.600406	-0.968579	-0.808216	-0.726322	-0.612394	-0.426879	-0.419378	-0.401623	-0.470965	-0.419872	-0.275271
0.389	-0.131003	-0.586506	-0.965072	-0.801605	-0.727347	-0.610103	-0.42053	-0.415228	-0.390515	-0.453612	-0.410223	-0.273343
0.39	-0.126931	-0.572667	-0.961716	-0.79385	-0.728191	-0.606718	-0.414828	-0.411455	-0.381005	-0.439711	-0.401639	-0.271441
0.391	-0.122734	-0.558901	-0.95834	-0.78439	-0.728781	-0.602092	-0.409735	-0.407934	-0.372761	-0.428309	-0.393745	-0.269499
0.392	-0.118392	-0.54535	-0.954646	-0.772788	-0.729055	-0.596355	-0.404857	-0.40441	-0.365498	-0.418929	-0.386232	-0.267366
0.393	-0.113936	-0.532239	-0.950371	-0.758912	-0.72889	-0.589753	-0.39999	-0.400548	-0.358966	-0.411067	-0.378956	-0.264954
0.394	-0.109442	-0.519722	-0.945334	-0.743201	-0.728133	-0.582477	-0.395146	-0.396218	-0.352899	-0.404004	-0.371871	-0.262196
0.395	-0.104982	-0.507831	-0.939344	-0.726362	-0.726744	-0.574691	-0.390339	-0.391568	-0.347081	-0.397262	-0.364917	-0.259087
0.396	-0.100709	-0.496563	-0.932258	-0.708819	-0.724723	-0.566592	-0.385507	-0.38691	-0.34136	-0.390626	-0.357946	-0.255724
0.397	-0.0968543	-0.485862	-0.924093	-0.690605	-0.721868	-0.558541	-0.380492	-0.382463	-0.33566	-0.383808	-0.350835	-0.252158
0.398	-0.093553	-0.47568	-0.914955	-0.671861	-0.717877	-0.55105	-0.375181	-0.378197	-0.330004	-0.376636	-0.343626	-0.248436
0.399	-0.0907419	-0.466071	-0.904893	-0.653201	-0.712677	-0.544378	-0.369613	-0.373941	-0.32445	-0.369268	-0.336429	-0.244692
0.4	-0.0882534	-0.456989	-0.893908	-0.635273	-0.706438	-0.538359	-0.36381	-0.36954	-0.319	-0.36187	-0.329356	-0.241052
0.401	-0.0860386	-0.448153	-0.882101	-0.618305	-0.699355	-0.532696	-0.35779	-0.365003	-0.313526	-0.354388	-0.32253	-0.237537
0.402	-0.0841708	-0.439265	-0.869738	-0.602305	-0.691559	-0.527201	-0.351684	-0.360484	-0.307803	-0.346612	-0.316045	-0.234154
0.403	-0.0826781	-0.430138	-0.857133	-0.587264	-0.683199	-0.521734	-0.3456	-0.355917	-0.301737	-0.338453	-0.309927	-0.230993
0.404	-0.0816075	-0.420701	-0.844531	-0.573132	-0.674443	-0.516108	-0.339502	-0.350964	-0.295558	-0.330154	-0.304166	-0.228145
0.405	-0.0810037	-0.411023	-0.832066	-0.559939	-0.665521	-0.510263	-0.333354	-0.345522	-0.28966	-0.321953	-0.298885	-0.225642
0.406	-0.0806976	-0.401298	-0.819726	-0.547647	-0.65672	-0.504268	-0.327283	-0.339811	-0.284286	-0.313884	-0.294309	-0.223486
0.407	-0.0804109	-0.391712	-0.807378	-0.535774	-0.648173	-0.497999	-0.321465	-0.333926	-0.279412	-0.306086	-0.290402	-0.221576
0.408	-0.0800183	-0.382322	-0.79488	-0.523809	-0.639803	-0.491113	-0.316021	-0.327809	-0.274823	-0.298793	-0.286827	-0.219722
0.409	-0.0795058	-0.373135	-0.782188	-0.51182	-0.631536	-0.483535	-0.31102	-0.321632	-0.270371	-0.292071	-0.283306	-0.217792
0.41	-0.0788535	-0.364109	-0.769386	-0.500175	-0.62347	-0.475704	-0.306375	-0.315738	-0.266167	-0.285912	-0.279736	-0.215724
0.411	-0.078107	-0.355076	-0.756544	-0.489046	-0.615818	-0.468103	-0.301924	-0.31022	-0.262328	-0.280479	-0.275975	-0.21349
0.412	-0.07735	-0.345981	-0.743537	-0.478432	-0.608573	-0.460726	-0.29768	-0.304893	-0.258723	-0.275886	-0.271826	-0.21106
0.413	-0.0765722	-0.33699	-0.730223	-0.468395	-0.601406	-0.453275	-0.293757	-0.299678	-0.255257	-0.271811	-0.267302	-0.208416
0.414	-0.0757039	-0.328236	-0.716636	-0.459205	-0.594013	-0.445729	-0.290122	-0.294871	-0.252115	-0.267794	-0.26261	-0.205649
0.415	-0.0746926	-0.31978	-0.702841	-0.451346	-0.586282	-0.438454	-0.286506	-0.290761	-0.249404	-0.263818	-0.25783	-0.202949
0.416	-0.0734976	-0.31169	-0.688887	-0.44523	-0.57815	-0.431725	-0.282627	-0.287099	-0.246842	-0.260079	-0.252937	-0.200388
0.417	-0.0721127	-0.303958	-0.674895	-0.440901	-0.569484	-0.425514	-0.278477	-0.283417	-0.24409	-0.256332	-0.247949	-0.197924
0.418	-0.0705739	-0.296518	-0.661054	-0.438263	-0.56022	-0.419762	-0.274231	-0.279667	-0.241137	-0.252111	-0.242888	-0.195555
0.419	-0.0689015	-0.289324	-0.647579	-0.437157	-0.550492	-0.414477	-0.269892	-0.276021	-0.238104	-0.247469	-0.237871	-0.193261
0.42	-0.0671296	-0.282356	-0.634566	-0.436988	-0.540509	-0.409502	-0.265374	-0.272251	-0.234931	-0.242869	-0.233094	-0.190967
0.421	-0.0653386	-0.27565	-0.621943	-0.436849	-0.530474	-0.404567	-0.260757	-0.267894	-0.231387	-0.238479	-0.228649	-0.188637
0.422	-0.0635818	-0.269267	-0.609584	-0.435968	-0.520581	-0.399553	-0.25617	-0.262912	-0.22735	-0.234082	-0.224556	-0.186239
0.423	-0.0618611	-0.263185	-0.597451	-0.433638	-0.510997	-0.394378	-0.251661	-0.257709	-0.222969	-0.22958	-0.220803	-0.183689
0.424	-0.0601682	-0.257239	-0.585638	-0.42919	-0.501872	-0.388857	-0.247242	-0.252577	-0.218375	-0.225049	-0.21728	-0.180988
0.425	-0.0585637	-0.251249	-0.574268	-0.422318	-0.493245	-0.382951	-0.242869	-0.247527	-0.213524	-0.220457	-0.213839	-0.178209
0.426	-0.0571974	-0.245148	-0.563454	-0.413249	-0.485028	-0.376847	-0.238561	-0.242573	-0.208616	-0.215807	-0.210453	-0.175369
0.427	-0.0561856	-0.238866	-0.553266	-0.402674	-0.477241	-0.370705	-0.234505	-0.237774	-0.204201	-0.211415	-0.207228	-0.1725
0.428	-0.0555473	-0.232334	-0.543594	-0.391426	-0.470031	-0.364485	-0.230802	-0.233129	-0.200613	-0.207641	-0.204239	-0.169689
0.429	-0.055235	-0.225564	-0.53421	-0.380138	-0.46344	-0.358047	-0.227269	-0.228609	-0.197721	-0.204456	-0.201432	-0.166934
0.43	-0.0551534	-0.218562	-0.525009	-0.369395	-0.457287	-0.351447	-0.223647	-0.224256	-0.195339	-0.201667	-0.198754	-0.164203
0.431	-0.0552079	-0.211301	-0.516	-0.359862	-0.451219	-0.34499	-0.219801	-0.220079	-0.193396	-0.199305	-0.196246	-0.161578
0.432	-0.0553063	-0.203847	-0.507115	-0.351986	-0.444891	-0.338847	-0.215725	-0.21592	-0.191695	-0.19736	-0.193911	-0.159159
0.433	-0.0553176	-0.196424	-0.498221	-0.345882	-0.438225	-0.332916	-0.211511	-0.21166	-0.189917	-0.195448	-0.191592	-0.156873
0.434	-0.05501	-0.189307	-0.489245	-0.341539	-0.431447	-0.327201	-0.207224	-0.207306	-0.187778	-0.193034	-0.189117	-0.154591
0.435	-0.054026	-0.182725	-0.480227	-0.338746	-0.424821	-0.321878	-0.202842	-0.202667	-0.185167	-0.189873	-0.186422	-0.152289
0.436	-0.0520974	-0.176775	-0.471288	-0.336972	-0.418413	-0.317032	-0.198444	-0.197287	-0.18215	-0.186137	-0.183513	-0.14998
0.437	-0.0491685	-0.171313	-0.462467	-0.335558	-0.4121	-0.312641	-0.194253	-0.190988	-0.178712	-0.182153	-0.180474	-0.147661
0.438	-0.0452391	-0.166053	-0.45371	-0.333872	-0.40577	-0.308601	-0.190483	-0.184168	-0.174763	-0.178101	-0.177438	-0.145397
0.439	-0.0403391	-0.160832	-0.445022	-0.331388	-0.399405	-0.304744	-0.187285	-0.177401	-0.170504	-0.174034	-0.174455	-0.143291
0.44	-0.0346221	-0.155641	-0.436457	-0.327842	-0.39297	-0.300922	-0.184642	-0.171032	-0.166448	-0.170041	-0.171514	-0.141353
0.441	-0.0283752	-0.150478	-0.427953	-0.32325	-0.3864	-0.297002	-0.182279	-0.165112	-0.163002	-0.166229	-0.168665	-0.139483
0.442	-0.0220158	-0.145346	-0.419342	-0.317747	-0.379725	-0.292773	-0.179919	-0.159643	-0.160261	-0.162628	-0.165886	-0.137599
0.443	-0.0161018	-0.140336	-0.410542	-0.311428	-0.373084	-0.288079	-0.177507	-0.154872	-0.15816	-0.159221	-0.163083	-0.135646
0.444	-0.0111588	-0.135689	-0.401581	-0.304291	-0.366559	-0.283114	-0.175105	-0.151081	-0.156579	-0.156027	-0.16038	-0.133464
0.445	-0.00747584	-0.131747	-0.392556	-0.296393	-0.36016	-0.278237	-0.172742	-0.148281	-0.155356	-0.153037	-0.158013	-0.13094
0.446	-0.00524414	-0.128731	-0.383601	-0.288021	-0.353901	-0.2735	-0.170339	-0.146442	-0.154244	-0.15009	-0.15599	-0.128225
0.447	-0.00460987	-0.126637	-0.374812	-0.279554	-0.347706	-0.268621	-0.167719	-0.145735	-0.152906	-0.146996	-0.154152	-0.125539
0.448	-0.00545758	-0.125346	-0.366231	-0.271231	-0.341378	-0.26346	-0.164782	-0.146255	-0.151118	-0.143702	-0.152312	-0.123006
0.449	-0.00738457	-0.124764	-0.357813	-0.262599	-0.334832	-0.258385	-0.161685	-0.147649	-0.148873	-0.140392	-0.150309	-0.120674
0.45	-0.00988672	-0.124779	-0.349554	-0.252016	-0.328294	-0.253961	-0.158683	-0.149306	-0.146168	-0.137404	-0.148067	-0.118501
0.451	-0.0125787	-0.125178	-0.341665	-0.23805	-0.322073	-0.250291	-0.155854	-0.150767	-0.142885	-0.134824	-0.145588	-0.116465
0.452	-0.0152488	-0.125679	-0.334337	-0.221475	-0.316183	-0.247006	-0.153144	-0.15186	-0.139027	-0.132485	-0.142906	-0.114575
0.453	-0.017729	-0.126045	-0.32751	-0.204842	-0.31037	-0.243754	-0.150477	-0.152534	-0.134804	-0.13036	-0.140033	-0.112788
0.454	-0.0198906	-0.126102	-0.321021	-0.190574	-0.304526	-0.240409	-0.147856	-0.152665	-0.130421	-0.128527	-0.136938	-0.111102
0.455	-0.0216914	-0.125647	-0.314758	-0.179732	-0.298886	-0.23692	-0.145589	-0.152152	-0.125968	-0.126889	-0.133644	-0.10961
0.456	-0.023145	-0.124506	-0.30864	-0.171892	-0.293666	-0.233102	-0.14411	-0.151101	-0.121466	-0.125277	-0.1303	-0.108282
0.457	-0.02432	-0.122722	-0.302544	-0.165839	-0.288762	-0.228702	-0.143464	-0.149695	-0.116964	-0.12366	-0.127149	-0.106897
0.458	-0.0252927	-0.120471	-0.296375	-0.16029	-0.284044	-0.223686	-0.143315	-0.147962	-0.112688	-0.122124	-0.124377	-0.105314
0.459	-0.026101	-0.117886	-0.290185	-0.153893	-0.279548	-0.218259	-0.143384	-0.145762	-0.108939	-0.120717	-0.122054	-0.103601
0.46	-0.026787	-0.115079	-0.284045	-0.14527	-0.275303	-0.212661	-0.143537	-0.142997	-0.105818	-0.119408	-0.120216	-0.10186
0.461	-0.02744	-0.11212	-0.27796	-0.133861	-0.271225	-0.20707	-0.143582	-0.139805	-0.103315	-0.118193	-0.118746	-0.100069
0.462	-0.0281376	-0.109017	-0.272013	-0.12041	-0.267189	-0.201711	-0.14327	-0.136448	-0.101577	-0.117094	-0.117317	-0.0981713
0.463	-0.0287769	-0.105844	-0.266346	-0.106465	-0.263028	-0.196978	-0.142428	-0.133016	-0.100796	-0.116185	-0.115623	-0.0962707
0.464	-0.0291155	-0.102781	-0.260952	-0.0938912	-0.2585	-0.193245	-0.14099	-0.129492	-0.100934	-0.115601	-0.113666	-0.0946339
0.465	-0.0290458	-0.100022	-0.255669	-0.0844637	-0.253438	-0.190579	-0.139029	-0.12604	-0.101627	-0.115254	-0.11173	-0.0934419
0.466	-0.0286301	-0.0976674	-0.250378	-0.0792567	-0.247886	-0.188759	-0.136754	-0.122985	-0.102411	-0.114663	-0.110078	-0.0926774
0.467	-0.0279171	-0.0957033	-0.245081	-0.078464	-0.242095	-0.187519	-0.134359	-0.120619	-0.103003	-0.113373	-0.108781	-0.0922435
0.468	-0.026923	-0.0940863	-0.239874	-0.0818299	-0.23634	-0.186716	-0.131908	-0.118893	-0.103308	-0.111404	-0.107754	-0.0921056
0.469	-0.0257062	-0.092806	-0.234889	-0.0888161	-0.230767	-0.18627	-0.129469	-0.117275	-0.103183	-0.109052	-0.106885	-0.0923195
0.47	-0.0243449	-0.0918337	-0.230235	-0.0985414	-0.225587	-0.186086	-0.127255	-0.115319	-0.102436	-0.106468	-0.106092	-0.0929474
0.471	-0.0229244	-0.0910615	-0.226001	-0.110038	-0.221219	-0.186182	-0.125439	-0.113147	-0.100964	-0.103752	-0.105281	-0.0939446
0.472	-0.0215495	-0.0904191	-0.222236	-0.122346	-0.217957	-0.186672	-0.123978	-0.111039	-0.0988123	-0.101193	-0.104423	-0.0951258
0.473	-0.0202759	-0.0899773	-0.218897	-0.134352	-0.215694	-0.18746	-0.1229	-0.108961	-0.0961519	-0.0990642	-0.103582	-0.0962923
0.474	-0.0190455	-0.0897754	-0.215856	-0.144893	-0.214163	-0.188225	-0.122508	-0.106754	-0.0930704	-0.0974289	-0.102777	-0.0973281
0.475	-0.017769	-0.0897034	-0.212909	-0.153083	-0.213205	-0.18879	-0.123032	-0.104511	-0.089584	-0.0962438	-0.101931	-0.0980726
0.476	-0.0164717	-0.0896682	-0.209843	-0.158574	-0.212719	-0.189164	-0.124349	-0.102558	-0.0859069	-0.0954639	-0.100994	-0.0983259
0.477	-0.0152885	-0.0896755	-0.206594	-0.161631	-0.212588	-0.189289	-0.126252	-0.101092	-0.0824745	-0.0950251	-0.100007	-0.0980641
0.478	-0.0143253	-0.0897185	-0.203274	-0.162851	-0.212666	-0.189107	-0.128675	-0.100084	-0.0797127	-0.0947686	-0.0990082	-0.0973832
0.479	-0.0136238	-0.0897806	-0.200092	-0.16272	-0.212706	-0.188715	-0.131506	-0.0995232	-0.0778846	-0.0945104	-0.0979176	-0.0963364
0.48	-0.0132389	-0.0899153	-0.197197	-0.161671	-0.212446	-0.188285	-0.134443	-0.0994092	-0.0770613	-0.094188	-0.0966299	-0.0949997
0.481	-0.0132103	-0.0901676	-0.194551	-0.160432	-0.211761	-0.187991	-0.137154	-0.0995176	-0.0770501	-0.0938141	-0.0951383	-0.0935317
0.482	-0.013438	-0.090503	-0.192144	-0.1598	-0.210666	-0.187966	-0.139477	-0.099512	-0.0775319	-0.0932928	-0.0935197	-0.0921203
0.483	-0.013696	-0.0909247	-0.190154	-0.160136	-0.209268	-0.188267	-0.141374	-0.09924	-0.0784183	-0.0923946	-0.0918587	-0.090942
0.484	-0.0138355	-0.091509	-0.188682	-0.16132	-0.207623	-0.188981	-0.142752	-0.0987107	-0.0797753	-0.0910763	-0.0902259	-0.0900831
0.485	-0.0138491	-0.0922683	-0.187597	-0.163008	-0.205649	-0.190206	-0.143611	-0.0979169	-0.0814324	-0.089742	-0.0887151	-0.0894666
0.486	-0.0137238	-0.0930981	-0.186664	-0.164873	-0.203354	-0.191854	-0.144293	-0.0968607	-0.0830023	-0.0888648	-0.087406	-0.0889853
0.487	-0.0134447	-0.0938511	-0.185682	-0.166684	-0.20098	-0.19368	-0.14515	-0.0956475	-0.084243	-0.0884817	-0.0863368	-0.0885675
0.488	-0.0130828	-0.0944492	-0.184585	-0.168306	-0.198828	-0.195485	-0.146041	-0.0944713	-0.0852297	-0.0884403	-0.0855422	-0.0881247
0.489	-0.0127692	-0.0949244	-0.183474	-0.169631	-0.197126	-0.197186	-0.146606	-0.0934869	-0.0860804	-0.0888949	-0.0850444	-0.0876787
0.49	-0.012652	-0.0952919	-0.182501	-0.170397	-0.196027	-0.19873	-0.146789	-0.0926743	-0.0865314	-0.0900718	-0.0848526	-0.08737
0.491	-0.012838	-0.0954845	-0.18178	-0.170218	-0.195625	-0.200056	-0.146751	-0.0919408	-0.0861683	-0.09176	-0.0849717	-0.0873286
0.492	-0.0133756	-0.0955187	-0.181448	-0.169053	-0.195967	-0.20112	-0.146563	-0.0913025	-0.0850993	-0.0934695	-0.085345	-0.0876475
0.493	-0.0143158	-0.0955828	-0.181624	-0.167369	-0.19699	-0.201889	-0.146212	-0.0908142	-0.0838748	-0.0949711	-0.0858625	-0.0883241
0.494	-0.0156649	-0.0958674	-0.182255	-0.165725	-0.198514	-0.202447	-0.145724	-0.0904668	-0.0828222	-0.0963428	-0.0864672	-0.0892191
0.495	-0.0172808	-0.0963784	-0.18314	-0.164417	-0.200425	-0.20306	-0.145122	-0.0902481	-0.0818917	-0.0975822	-0.087133	-0.0901197
0.496	-0.0189482	-0.0969548	-0.184119	-0.163532	-0.202643	-0.203977	-0.144395	-0.0902131	-0.0809955	-0.0985737	-0.087796	-0.0908799
0.497	-0.0204956	-0.0974298	-0.185126	-0.163144	-0.204876	-0.205242	-0.1436	-0.0904485	-0.0802027	-0.0993845	-0.0884186	-0.0915451
0.498	-0.0218121	-0.097743	-0.186106	-0.163324	-0.206799	-0.206663	-0.142856	-0.0909547	-0.079669	-0.100307	-0.0889274	-0.0922995
0.499	-0.0228506	-0.0979323	-0.187054	-0.164076	-0.208395	-0.207895	-0.142201	-0.0916911	-0.0795248	-0.101534	-0.0891134	-0.0931819
0.5	-0.0235991	-0.0980706	-0.1881	-0.165344	-0.20978	-0.208674	-0.141571	-0.0927358	-0.0797941	-0.102818	-0.0888233	-0.0939204
0.501	-0.0240437	-0.0982191	-0.189436	-0.166993	-0.211008	-0.209019	-0.140991	-0.0941899	-0.0803463	-0.103687	-0.0881462	-0.094262
0.502	-0.0241742	-0.0983536	-0.191242	-0.168943	-0.212184	-0.209164	-0.140611	-0.0959962	-0.080991	-0.104022	-0.0873154	-0.0942912
0.503	-0.0239508	-0.0983199	-0.193576	-0.171266	-0.213459	-0.209165	-0.140392	-0.0980056	-0.0816179	-0.104131	-0.086521	-0.0942529
0.504	-0.0232575	-0.0979004	-0.196283	-0.173935	-0.214952	-0.208766	-0.140064	-0.100149	-0.0822483	-0.104218	-0.0858296	-0.0942952
0.505	-0.0219901	-0.096938	-0.199084	-0.176754	-0.216665	-0.207777	-0.139439	-0.102486	-0.0829119	-0.104111	-0.085323	-0.0944514
0.506	-0.0201593	-0.0954664	-0.201709	-0.179603	-0.218375	-0.206287	-0.138477	-0.105099	-0.0835234	-0.10368	-0.0852422	-0.0946171
0.507	-0.017856	-0.0936804	-0.203963	-0.182295	-0.2198	-0.204485	-0.137118	-0.107946	-0.0840744	-0.103078	-0.0857447	-0.0944806
0.508	-0.0152236	-0.0917525	-0.205785	-0.184319	-0.220866	-0.202567	-0.135348	-0.110844	-0.0846925	-0.10237	-0.0866247	-0.0936909
0.509	-0.0124509	-0.0898015	-0.207214	-0.185011	-0.221733	-0.200792	-0.133288	-0.113626	-0.0854186	-0.101446	-0.0875795	-0.0920347
0.51	-0.00973296	-0.0879463	-0.208307	-0.183951	-0.222654	-0.199305	-0.131077	-0.116191	-0.0861729	-0.100361	-0.0885119	-0.0893987
0.511	-0.0072659	-0.0862397	-0.209155	-0.181268	-0.223684	-0.197927	-0.128814	-0.118395	-0.0868915	-0.0993591	-0.0893294	-0.0858087
0.512	-0.00518861	-0.0846369	-0.20982	-0.177493	-0.224573	-0.196408	-0.126574	-0.120046	-0.0875989	-0.0985948	-0.0898389	-0.0814976
0.513	-0.00352631	-0.0831188	-0.210195	-0.173066	-0.225036	-0.194789	-0.124464	-0.120958	-0.0883374	-0.0980595	-0.0899492	-0.0768899
0.514	-0.00224916	-0.0817288	-0.210144	-0.168326	-0.224966	-0.193316	-0.122661	-0.120947	-0.0891157	-0.0977632	-0.0896959	-0.0725688
0.515	-0.00133375	-0.080475	-0.209675	-0.163607	-0.224387	-0.192166	-0.121223	-0.119882	-0.0898706	-0.097841	-0.0891715	-0.0690168
0.516	-0.000773327	-0.0793581	-0.208878	-0.159039	-0.223385	-0.191341	-0.120013	-0.117869	-0.0904545	-0.0983125	-0.0885256	-0.0663919
0.517	-0.000507276	-0.0784409	-0.207846	-0.154669	-0.222121	-0.190773	-0.118896	-0.115312	-0.0908131	-0.0988398	-0.087858	-0.0647656
0.518	-0.000336921	-0.0777809	-0.206715	-0.150739	-0.22077	-0.190402	-0.117812	-0.112703	-0.0910135	-0.099061	-0.0871775	-0.0643007
0.519	5.17767e-05	-0.0773967	-0.205614	-0.147425	-0.219391	-0.190036	-0.116762	-0.110282	-0.0910563	-0.0990079	-0.0865246	-0.0650598
0.52	0.000968382	-0.0773106	-0.204496	-0.144489	-0.217963	-0.189359	-0.115811	-0.107901	-0.0909068	-0.0988797	-0.0860028	-0.066879
0.521	0.00262181	-0.0774185	-0.20323	-0.141405	-0.216465	-0.188252	-0.114967	-0.105321	-0.0906089	-0.0988064	-0.0857386	-0.0694009
0.522	0.00514063	-0.0773967	-0.201809	-0.137839	-0.214898	-0.186815	-0.114168	-0.102535	-0.0902353	-0.0989846	-0.0857454	-0.0721605
0.523	0.00855111	-0.0768876	-0.200317	-0.133941	-0.213316	-0.185018	-0.113405	-0.0997604	-0.0898324	-0.099525	-0.0857089	-0.0747883
0.524	0.0126901	-0.0756863	-0.198835	-0.130092	-0.211759	-0.182682	-0.112704	-0.0973269	-0.0893827	-0.100226	-0.0851181	-0.0771444
0.525	0.0172472	-0.0738012	-0.197355	-0.126397	-0.210205	-0.179708	-0.11209	-0.0954873	-0.0888678	-0.100853	-0.0836417	-0.079092
0.526	0.0218766	-0.0713726	-0.195743	-0.122556	-0.208622	-0.176181	-0.111555	-0.0942165	-0.0883542	-0.101433	-0.0812533	-0.080343
0.527	0.0262552	-0.0684681	-0.193856	-0.118299	-0.206933	-0.172361	-0.110962	-0.0933285	-0.0877854	-0.102043	-0.0781653	-0.0806686
0.528	0.0300547	-0.0650854	-0.191702	-0.1138	-0.205005	-0.168474	-0.110159	-0.0927452	-0.0868936	-0.102517	-0.0747156	-0.0800054
0.529	0.0329428	-0.061355	-0.189399	-0.109479	-0.202797	-0.164533	-0.109048	-0.0924267	-0.0855082	-0.102626	-0.0711425	-0.0784829
0.53	0.0347356	-0.0575094	-0.187	-0.105562	-0.200386	-0.16048	-0.107414	-0.0922315	-0.0836815	-0.102292	-0.0675137	-0.0764651
0.531	0.0354821	-0.053725	-0.184407	-0.102001	-0.197773	-0.156376	-0.10507	-0.0920018	-0.0815135	-0.101349	-0.0639456	-0.0742816
0.532	0.0353617	-0.0501275	-0.181481	-0.0987642	-0.194858	-0.152388	-0.102229	-0.0915825	-0.0790947	-0.0995206	-0.060693	-0.0719997
0.533	0.0345118	-0.0467605	-0.178175	-0.0960873	-0.191619	-0.148671	-0.0994066	-0.0908304	-0.0765741	-0.096847	-0.0580275	-0.0695625
0.534	0.0329575	-0.0435726	-0.174547	-0.0942263	-0.188127	-0.145327	-0.0968411	-0.0896872	-0.0741402	-0.0938028	-0.0562058	-0.0669398
0.535	0.0307471	-0.0405268	-0.170758	-0.0931325	-0.184378	-0.142438	-0.0943585	-0.0881606	-0.0719084	-0.0908018	-0.0553962	-0.0642381
0.536	0.0280977	-0.0375999	-0.167	-0.0926391	-0.180334	-0.139987	-0.0918872	-0.0862567	-0.0699314	-0.0879209	-0.0555594	-0.0617463
0.537	0.0253783	-0.0346834	-0.163453	-0.0925879	-0.176126	-0.137818	-0.0895516	-0.083904	-0.0682931	-0.0852739	-0.0565362	-0.0597361
0.538	0.0229168	-0.0316383	-0.160258	-0.0925852	-0.172066	-0.135854	-0.0873175	-0.0809211	-0.0670341	-0.0830951	-0.0581461	-0.0583191
0.539	0.0208031	-0.0284451	-0.157411	-0.0922379	-0.168389	-0.134159	-0.0850753	-0.0771846	-0.0661097	-0.0814118	-0.060156	-0.057463
0.54	0.0189428	-0.0251988	-0.154775	-0.0916203	-0.16506	-0.13272	-0.0829491	-0.0728429	-0.0654874	-0.0800924	-0.0623818	-0.057014
0.541	0.01721	-0.0220101	-0.152209	-0.0909147	-0.161923	-0.131366	-0.0811937	-0.0681979	-0.0651456	-0.0790745	-0.0647518	-0.0567937
0.542	0.0154867	-0.0189264	-0.149602	-0.0899439	-0.158957	-0.129903	-0.0798874	-0.0633777	-0.0649913	-0.0783816	-0.067102	-0.056656
0.543	0.0137416	-0.0158458	-0.146894	-0.0885647	-0.156179	-0.128226	-0.0788901	-0.0583719	-0.0648093	-0.0780648	-0.069127	-0.056456
0.544	0.0120825	-0.0125968	-0.144064	-0.0870167	-0.153477	-0.126269	-0.0779797	-0.0533824	-0.0644081	-0.0781266	-0.0705358	-0.0560556
0.545	0.0106491	-0.00920453	-0.141124	-0.0855527	-0.150785	-0.123958	-0.0769512	-0.0488037	-0.0638393	-0.0784899	-0.0711536	-0.0553884
0.546	0.00957011	-0.00590227	-0.138124	-0.0840417	-0.148152	-0.121271	-0.075706	-0.0450109	-0.0632434	-0.078976	-0.071039	-0.0545036
0.547	0.00893575	-0.00287113	-0.135117	-0.082101	-0.145538	-0.11824	-0.0742015	-0.0424182	-0.0626131	-0.0792737	-0.0703908	-0.0534808
0.548	0.00868221	-0.000215395	-0.132142	-0.0796594	-0.142829	-0.11495	-0.0723373	-0.0414434	-0.061901	-0.0791289	-0.0692764	-0.0523457
0.549	0.00868952	0.00192096	-0.129247	-0.077176	-0.139958	-0.111601	-0.0699707	-0.0422205	-0.0611204	-0.0785912	-0.0676578	-0.0511092
0.55	0.00889172	0.00343011	-0.126458	-0.0750912	-0.136883	-0.108472	-0.0670783	-0.0444113	-0.0602172	-0.0777635	-0.0655759	-0.0498673
0.551	0.00915631	0.00429686	-0.123805	-0.0733461	-0.13365	-0.10575	-0.0639185	-0.0473695	-0.059008	-0.0764118	-0.0631485	-0.0487893
0.552	0.00931332	0.00457222	-0.121351	-0.0716086	-0.13045	-0.103443	-0.0608746	-0.050461	-0.0573169	-0.0742919	-0.0604562	-0.0479865
0.553	0.00932749	0.00440836	-0.119123	-0.0696451	-0.127447	-0.101489	-0.0581834	-0.0532883	-0.0550769	-0.0716225	-0.0575662	-0.0474925
0.554	0.00932821	0.00400465	-0.117016	-0.0673484	-0.124627	-0.0998897	-0.0559193	-0.0557354	-0.0523302	-0.0688107	-0.0546558	-0.0473022
0.555	0.00947841	0.00350515	-0.114842	-0.0646229	-0.12184	-0.0986706	-0.0541464	-0.0578016	-0.0492277	-0.0659547	-0.0519487	-0.0473321
0.556	0.00981162	0.002963	-0.112462	-0.0612546	-0.118954	-0.097683	-0.0530398	-0.059431	-0.0459768	-0.0629572	-0.0496104	-0.0474484
0.557	0.0101804	0.00232144	-0.109749	-0.0570578	-0.116035	-0.0966548	-0.0527392	-0.060541	-0.042824	-0.0600545	-0.0477593	-0.0475986
0.558	0.0103784	0.00150836	-0.10659	-0.052287	-0.113313	-0.0955146	-0.0530992	-0.0611208	-0.0400821	-0.0577923	-0.0464651	-0.0477728
0.559	0.0103181	0.000586466	-0.103056	-0.0475828	-0.110956	-0.0943991	-0.0537789	-0.061138	-0.0379848	-0.056272	-0.0457347	-0.0478475
0.56	0.0100296	-0.00028624	-0.0993706	-0.0435009	-0.108998	-0.0933479	-0.0545011	-0.0604954	-0.0365406	-0.0549328	-0.0454794	-0.0476802
0.561	0.00963667	-0.00105638	-0.0957425	-0.0403179	-0.107373	-0.09228	-0.0551586	-0.059249	-0.0356515	-0.0533498	-0.0455201	-0.0473164
0.562	0.0093353	-0.00181707	-0.092312	-0.0381302	-0.105927	-0.0911901	-0.0557433	-0.0576017	-0.0352187	-0.0516657	-0.0456505	-0.0469186
0.563	0.00919864	-0.00260148	-0.089151	-0.0369091	-0.104485	-0.0901701	-0.0561214	-0.0557092	-0.0351452	-0.0500091	-0.045742	-0.0464912
0.564	0.00912471	-0.00335419	-0.0863163	-0.0365597	-0.102962	-0.0892574	-0.0559827	-0.053713	-0.0353884	-0.0482136	-0.0457477	-0.0458805
0.565	0.00904883	-0.00408791	-0.0838525	-0.0370291	-0.101285	-0.0883309	-0.0550685	-0.0517707	-0.0358992	-0.0463765	-0.0455324	-0.0450583
0.566	0.00904936	-0.0048245	-0.0817645	-0.0383893	-0.0993282	-0.0872386	-0.0532674	-0.0499744	-0.0365483	-0.0449743	-0.0449665	-0.0441349
0.567	0.00919461	-0.00555072	-0.0800454	-0.0408337	-0.0971097	-0.0859659	-0.0505928	-0.048288	-0.0371298	-0.0442236	-0.0441337	-0.0431632
0.568	0.00941682	-0.00626258	-0.0786632	-0.0443028	-0.0948967	-0.0845514	-0.0473165	-0.0466465	-0.0373489	-0.0438146	-0.0431709	-0.0420861
0.569	0.0096275	-0.00689166	-0.0775653	-0.0479815	-0.0929815	-0.0829532	-0.0441093	-0.0451616	-0.0369447	-0.0433501	-0.0420652	-0.0407793
0.57	0.00988329	-0.00729477	-0.0767403	-0.0508464	-0.0914019	-0.0811589	-0.0416925	-0.0440023	-0.0358572	-0.0427517	-0.0407918	-0.0392382
0.571	0.0103537	-0.00733191	-0.0762091	-0.0529758	-0.089948	-0.0793115	-0.0402477	-0.0431268	-0.0342417	-0.042124	-0.0395299	-0.0376972
0.572	0.0111482	-0.00691798	-0.0759071	-0.0553362	-0.0884694	-0.077533	-0.0394972	-0.0423658	-0.032419	-0.041434	-0.0385024	-0.0364278
0.573	0.0122591	-0.00607442	-0.075577	-0.0582157	-0.0869718	-0.0757988	-0.0391839	-0.0416352	-0.0307293	-0.040659	-0.0376871	-0.0355448
0.574	0.0135699	-0.00494179	-0.0748679	-0.0609183	-0.0854732	-0.0742036	-0.0392521	-0.0408328	-0.0293198	-0.0400306	-0.0369074	-0.0349819
0.575	0.0148538	-0.00368225	-0.0735722	-0.0628391	-0.0840108	-0.0730525	-0.0397006	-0.0397849	-0.0281528	-0.0397406	-0.0361271	-0.0345777
0.576	0.0159384	-0.00236563	-0.0717622	-0.0639608	-0.0827036	-0.0725299	-0.0403635	-0.0385339	-0.0272137	-0.0396787	-0.0354925	-0.0342527
0.577	0.0168112	-0.000930708	-0.0697355	-0.0643301	-0.0816759	-0.0725692	-0.0409644	-0.0372882	-0.0265966	-0.0396497	-0.0351358	-0.0339874
0.578	0.017496	0.000724044	-0.0677598	-0.0636917	-0.0809948	-0.0729585	-0.0413949	-0.036061	-0.0263668	-0.0395905	-0.0350427	-0.0336697
0.579	0.0179668	0.0026031	-0.0658689	-0.0616914	-0.0806982	-0.0734366	-0.0417396	-0.0348043	-0.0264197	-0.0394653	-0.0350283	-0.0331881
0.58	0.018239	0.00461658	-0.0639099	-0.0581931	-0.0806988	-0.0738007	-0.0419399	-0.033773	-0.0265535	-0.0392523	-0.0348473	-0.032557
0.581	0.018426	0.0066297	-0.0617233	-0.0536773	-0.080692	-0.073902	-0.0417655	-0.0332697	-0.0266244	-0.0391043	-0.0343957	-0.0318115
0.582	0.0185584	0.00846504	-0.0592945	-0.049354	-0.0803877	-0.0735911	-0.0411408	-0.0331597	-0.0266552	-0.0391415	-0.0337096	-0.0309513
0.583	0.0185387	0.0099284	-0.05676	-0.0464617	-0.0797933	-0.0728472	-0.0402264	-0.0330697	-0.0267992	-0.0391511	-0.0328778	-0.0299932
0.584	0.0183543	0.0108514	-0.0543099	-0.0454157	-0.079102	-0.071931	-0.0392935	-0.032915	-0.0270531	-0.0387427	-0.0320493	-0.0289705
0.585	0.0180953	0.0111147	-0.052087	-0.0457987	-0.0784644	-0.0711656	-0.0385476	-0.0328918	-0.0270915	-0.0377448	-0.0313367	-0.0279517
0.586	0.0178071	0.0107672	-0.0501069	-0.0470061	-0.0779569	-0.0706246	-0.0380271	-0.0330835	-0.0264557	-0.0363424	-0.0306461	-0.0270629
0.587	0.0174396	0.010047	-0.0482915	-0.0486549	-0.0775185	-0.0702112	-0.0376457	-0.0334014	-0.0249223	-0.0348057	-0.0296707	-0.0264149
0.588	0.0168783	0.00917736	-0.0466227	-0.0505763	-0.0769662	-0.069881	-0.0372404	-0.0337888	-0.0227985	-0.0333177	-0.0281645	-0.0259124
0.589	0.0160016	0.00832849	-0.0451949	-0.0527137	-0.0762381	-0.0695885	-0.0367519	-0.0341712	-0.0206682	-0.032033	-0.026247	-0.0252645
0.59	0.014771	0.0076447	-0.0440699	-0.054866	-0.07546	-0.0691116	-0.0363264	-0.0342866	-0.0188261	-0.0310401	-0.0243401	-0.0243802
0.591	0.0132937	0.007189	-0.0431625	-0.0564683	-0.0747385	-0.0681985	-0.0360685	-0.0338224	-0.0172627	-0.0303881	-0.0228514	-0.0235369
0.592	0.0118013	0.00695629	-0.0423415	-0.0568174	-0.074036	-0.0668391	-0.0358738	-0.0327562	-0.0160126	-0.0301536	-0.0219575	-0.0230697
0.593	0.0105129	0.00687487	-0.0415704	-0.0554859	-0.0731319	-0.0651755	-0.0355124	-0.0313816	-0.0151655	-0.0303413	-0.0215932	-0.0230764
0.594	0.00950679	0.00686964	-0.0408852	-0.0524671	-0.0716655	-0.0632814	-0.03486	-0.0299503	-0.014853	-0.0308629	-0.0216349	-0.023401
0.595	0.00880982	0.00694956	-0.0402798	-0.0480545	-0.0695066	-0.0612415	-0.0340558	-0.0284967	-0.0152793	-0.0315957	-0.0220094	-0.0238179
0.596	0.00841454	0.00712822	-0.0396619	-0.0426357	-0.0669767	-0.0592749	-0.0332392	-0.0270464	-0.0164033	-0.0324182	-0.0225907	-0.0242107
0.597	0.00819314	0.00734741	-0.0390023	-0.0365783	-0.0644884	-0.0575967	-0.0323497	-0.025779	-0.01778	-0.0332675	-0.0231894	-0.0245854
0.598	0.00801503	0.00748436	-0.0383873	-0.0304116	-0.0622321	-0.0563103	-0.0314299	-0.0248982	-0.0189776	-0.034146	-0.0236773	-0.0249613
0.599	0.00781269	0.00740784	-0.0378048	-0.0248814	-0.0602306	-0.0554367	-0.0307567	-0.0244291	-0.0199767	-0.0351969	-0.024071	-0.0252326
0.6	0.00753602	0.00710441	-0.0371283	-0.0205302	-0.0585411	-0.0548924	-0.0304527	-0.0242849	-0.0209406	-0.0365596	-0.0244754	-0.0252068
0.601	0.00723016	0.00668945	-0.0362965	-0.0173857	-0.0574203	-0.0544907	-0.0303185	-0.0243976	-0.0217797	-0.0378246	-0.02495	-0.024907
0.602	0.00704831	0.00630441	-0.0353504	-0.0150072	-0.0571163	-0.0540151	-0.0302137	-0.0246087	-0.0222481	-0.038038	-0.0255026	-0.0245815
0.603	0.00706688	0.00603681	-0.0344081	-0.0127468	-0.0575291	-0.0533383	-0.0302504	-0.0247457	-0.0223056	-0.0365781	-0.026158	-0.0243586
0.604	0.00722522	0.00584607	-0.033602	-0.0099231	-0.0583219	-0.0524426	-0.0305346	-0.0248379	-0.0221327	-0.0338348	-0.0268822	-0.024224
0.605	0.00746856	0.00555328	-0.0329842	-0.00546961	-0.0592422	-0.0512472	-0.03095	-0.024964	-0.0218383	-0.0307397	-0.0275126	-0.0242021
0.606	0.00780973	0.00498409	-0.0325603	0.00171484	-0.060169	-0.0496036	-0.0312263	-0.0250513	-0.0213595	-0.0278042	-0.0279204	-0.0243278
0.607	0.00823814	0.00412204	-0.0323651	0.0111239	-0.0610264	-0.0475645	-0.0312359	-0.0250053	-0.020699	-0.0250664	-0.0280462	-0.0245972
0.608	0.00860464	0.00308799	-0.0324165	0.0203715	-0.0617377	-0.0455096	-0.0311903	-0.0248499	-0.0199789	-0.0225797	-0.02782	-0.0250083
0.609	0.00868572	0.00200817	-0.0326787	0.0270021	-0.0621879	-0.0439123	-0.0314024	-0.0246829	-0.0192007	-0.0204443	-0.0272718	-0.0255609
0.61	0.00839903	0.000955107	-0.0330758	0.0297163	-0.0622592	-0.0429888	-0.0319548	-0.0245506	-0.0182467	-0.0187489	-0.0265401	-0.0262009
0.611	0.007805	2.96613e-06	-0.0334479	0.0282028	-0.0619015	-0.0426812	-0.0326777	-0.024332	-0.0171263	-0.0176794	-0.0257368	-0.0268102
0.612	0.00696881	-0.000774471	-0.0336307	0.0228823	-0.0611837	-0.0428238	-0.0333155	-0.0239203	-0.0160181	-0.0173528	-0.0249274	-0.0272457
0.613	0.00603625	-0.00140624	-0.0336357	0.0149034	-0.0602927	-0.0431278	-0.0337731	-0.0234716	-0.0151337	-0.0176833	-0.024159	-0.0273376
0.614	0.00525244	-0.00206415	-0.0335629	0.00576004	-0.0593866	-0.043385	-0.0341873	-0.0232283	-0.0146387	-0.0186805	-0.0234763	-0.026988
0.615	0.00479389	-0.00290947	-0.0334334	-0.00344655	-0.058484	-0.0436953	-0.034649	-0.0233342	-0.0145914	-0.0204505	-0.0229554	-0.0263269
0.616	0.00471395	-0.00393513	-0.0332655	-0.0124107	-0.057582	-0.0441419	-0.0350716	-0.0238643	-0.0149301	-0.0227423	-0.0226641	-0.0256248
0.617	0.00490319	-0.00501174	-0.0331185	-0.0213188	-0.0567073	-0.0446036	-0.03536	-0.0247115	-0.0155845	-0.025007	-0.0225808	-0.0250585
0.618	0.00514458	-0.00595741	-0.0329692	-0.0301523	-0.055828	-0.0449959	-0.035464	-0.0255276	-0.0164815	-0.026889	-0.0226237	-0.0246061
0.619	0.00542447	-0.00660832	-0.0327093	-0.0384186	-0.0549554	-0.0452704	-0.0353387	-0.0260312	-0.0174474	-0.0283511	-0.0226723	-0.0242105
0.62	0.00608575	-0.006961	-0.0322874	-0.0456223	-0.0542035	-0.0452853	-0.0349978	-0.026225	-0.0183177	-0.0294293	-0.0225386	-0.0239905
0.621	0.00759858	-0.00714534	-0.0317151	-0.0516199	-0.0536341	-0.0449702	-0.034537	-0.026181	-0.0190453	-0.0300331	-0.0220876	-0.0241422
0.622	0.0101814	-0.00725255	-0.0309695	-0.0563624	-0.0532577	-0.0444393	-0.0341415	-0.0259002	-0.0196558	-0.0300754	-0.0213523	-0.0247236
0.623	0.0135986	-0.00726522	-0.030064	-0.0596428	-0.0530957	-0.0438573	-0.0340243	-0.0253737	-0.0202269	-0.029618	-0.0204795	-0.0256019
0.624	0.0173043	-0.00701302	-0.0291482	-0.0612395	-0.0531123	-0.0433361	-0.0341978	-0.0245609	-0.0207037	-0.0287311	-0.0196931	-0.0265279
0.625	0.020717	-0.00631025	-0.0284203	-0.0611469	-0.0532085	-0.0429168	-0.0344294	-0.0234718	-0.0208739	-0.0274936	-0.0192112	-0.0273521
0.626	0.0233696	-0.00525697	-0.0280474	-0.0596252	-0.0533409	-0.0426839	-0.0345529	-0.0222885	-0.0207209	-0.0261968	-0.0191163	-0.0280858
0.627	0.0249769	-0.00414057	-0.0281198	-0.0570592	-0.0535745	-0.042777	-0.0346723	-0.0212073	-0.0204457	-0.0252408	-0.0193801	-0.0286266
0.628	0.0254945	-0.00316678	-0.0285906	-0.0537874	-0.0539283	-0.043202	-0.0349589	-0.0201887	-0.0201556	-0.0248071	-0.0198852	-0.0287563
0.629	0.0250965	-0.00248536	-0.0293187	-0.0502052	-0.0542517	-0.0437933	-0.0354562	-0.0190646	-0.0198171	-0.0249024	-0.0205025	-0.0284703
0.63	0.0240561	-0.00220039	-0.0300739	-0.0468547	-0.0543059	-0.0442897	-0.0361807	-0.0178818	-0.0193673	-0.025564	-0.0211969	-0.0279692
0.631	0.0225925	-0.00226501	-0.0305723	-0.0441188	-0.0539767	-0.0444725	-0.0370752	-0.0168665	-0.0187579	-0.0266165	-0.0218086	-0.0273706
0.632	0.0208468	-0.00250969	-0.0307413	-0.0420746	-0.053392	-0.0443778	-0.0378516	-0.0160626	-0.0180245	-0.0275129	-0.0220614	-0.0266425
0.633	0.01898	-0.00274781	-0.0307489	-0.0407655	-0.0526013	-0.0442969	-0.0381403	-0.0153176	-0.0172789	-0.0278776	-0.0219799	-0.0257282
0.634	0.0171485	-0.0028976	-0.0306987	-0.040286	-0.0512894	-0.0444699	-0.0377556	-0.0146296	-0.0166769	-0.027873	-0.0218975	-0.0246402
0.635	0.0154251	-0.0030569	-0.0306289	-0.0405525	-0.0491898	-0.0448533	-0.0368094	-0.0141647	-0.0164144	-0.0277609	-0.0220637	-0.0235815
0.636	0.0137891	-0.00335401	-0.0306527	-0.0412772	-0.0465225	-0.0452796	-0.0355509	-0.0139515	-0.0165705	-0.0275868	-0.0224152	-0.0229391
0.637	0.0121818	-0.0037653	-0.0308135	-0.0422209	-0.0438344	-0.0456477	-0.0341582	-0.0138247	-0.0170684	-0.0273322	-0.02273	-0.022959
0.638	0.0106385	-0.00417939	-0.0310014	-0.0434008	-0.0417366	-0.0459106	-0.0327544	-0.0136249	-0.0178167	-0.0269558	-0.0229173	-0.0235567
0.639	0.00930488	-0.00452338	-0.0311205	-0.0449734	-0.0407003	-0.0461769	-0.0314427	-0.0134406	-0.0186754	-0.0264461	-0.0230634	-0.0244663
0.64	0.00830175	-0.00474516	-0.0311961	-0.0469143	-0.0408167	-0.0466121	-0.0303439	-0.0135721	-0.0194093	-0.0260076	-0.0233087	-0.0254243
0.641	0.00764254	-0.00482836	-0.0313127	-0.0490567	-0.0418323	-0.04705	-0.0296557	-0.0141482	-0.0198824	-0.0260451	-0.02372	-0.0262836
0.642	0.00719624	-0.00481792	-0.0315325	-0.051283	-0.0434082	-0.0471552	-0.0294994	-0.0149983	-0.0201458	-0.0267828	-0.0242342	-0.0270113
0.643	0.00674187	-0.00479493	-0.0318587	-0.0534161	-0.0452596	-0.0469099	-0.0298197	-0.0158565	-0.020264	-0.0278888	-0.0247517	-0.0276128
0.644	0.00617719	-0.00487861	-0.0322711	-0.0551181	-0.0472175	-0.046509	-0.0305855	-0.0165273	-0.020262	-0.0286276	-0.0252031	-0.0280792
0.645	0.00556805	-0.00513084	-0.0327856	-0.0560025	-0.0492505	-0.0459941	-0.0317471	-0.0169903	-0.0202176	-0.0283891	-0.0255205	-0.0284058
0.646	0.00501022	-0.00548213	-0.033363	-0.0559055	-0.0513215	-0.0453407	-0.0330719	-0.0174067	-0.0201565	-0.0271114	-0.0256932	-0.0286494
0.647	0.00456805	-0.00581125	-0.0338386	-0.0550997	-0.0532616	-0.0446066	-0.0344058	-0.0180032	-0.0199782	-0.0251752	-0.0257827	-0.0288459
0.648	0.00427046	-0.00606012	-0.0340944	-0.0540842	-0.0548356	-0.0437989	-0.03576	-0.0188178	-0.0196969	-0.0229608	-0.0258087	-0.0289532
0.649	0.00410177	-0.00626565	-0.0341355	-0.0531102	-0.0558977	-0.0430568	-0.0369958	-0.0195715	-0.0195512	-0.0207705	-0.02569	-0.0289179
0.65	0.00404019	-0.0064855	-0.0339926	-0.0520548	-0.0564519	-0.0428358	-0.0378308	-0.0200327	-0.0197195	-0.0189752	-0.0253096	-0.028691
0.651	0.00413494	-0.0067839	-0.0337507	-0.0508292	-0.0565558	-0.0433871	-0.038216	-0.0203099	-0.0201066	-0.0178418	-0.0246568	-0.0282961
0.652	0.00439264	-0.00725509	-0.0335554	-0.0494929	-0.0562208	-0.0444023	-0.0383504	-0.0205162	-0.0204608	-0.0172427	-0.0238182	-0.0278734
0.653	0.00466335	-0.00795559	-0.0334823	-0.047743	-0.0554313	-0.0454543	-0.0382601	-0.0205098	-0.0206002	-0.0167712	-0.0228477	-0.0275776
0.654	0.00480017	-0.00880186	-0.0335014	-0.0449978	-0.0543214	-0.0464155	-0.0376994	-0.0201998	-0.0205164	-0.0162525	-0.0217993	-0.0275102
0.655	0.00476566	-0.00954035	-0.033536	-0.0411089	-0.0532306	-0.0473594	-0.0364959	-0.0197335	-0.0202407	-0.0159705	-0.0208252	-0.0276887
0.656	0.00463027	-0.00990064	-0.0334537	-0.0364481	-0.05244	-0.0482502	-0.034787	-0.0192803	-0.0197261	-0.0162461	-0.0201187	-0.0280113
0.657	0.00451465	-0.00972609	-0.0331132	-0.0315732	-0.0520178	-0.0488191	-0.032879	-0.0188394	-0.0189842	-0.0171799	-0.0197259	-0.0283747
0.658	0.00444243	-0.00892456	-0.032552	-0.0270596	-0.0519124	-0.0488461	-0.0310243	-0.0183341	-0.0181356	-0.0188517	-0.0195239	-0.0287358
0.659	0.00431491	-0.00753906	-0.0319364	-0.0233393	-0.0520082	-0.0485266	-0.0294376	-0.0178028	-0.0173006	-0.0211764	-0.0194298	-0.0289308
0.66	0.00405677	-0.00590639	-0.0313615	-0.0207103	-0.0521811	-0.0482551	-0.0282483	-0.0173338	-0.016605	-0.0237606	-0.0194757	-0.0287169
0.661	0.00371429	-0.00450213	-0.0308897	-0.0194553	-0.052358	-0.0480565	-0.0273258	-0.0169615	-0.0162499	-0.026355	-0.0197144	-0.0280656
0.662	0.00338677	-0.00355158	-0.0305177	-0.0196168	-0.0524732	-0.0475734	-0.0264459	-0.0167701	-0.0164372	-0.0289761	-0.0200683	-0.0271685
0.663	0.00317696	-0.00295824	-0.0301432	-0.0209155	-0.0523756	-0.0465914	-0.0256809	-0.0168878	-0.0171308	-0.0313431	-0.0203101	-0.0262409
0.664	0.00317281	-0.00261795	-0.0297133	-0.0230749	-0.0518939	-0.0453375	-0.0252674	-0.0173014	-0.0180274	-0.0329536	-0.0202803	-0.025478
0.665	0.00338242	-0.00254134	-0.0291877	-0.0258296	-0.0510036	-0.0441679	-0.0250424	-0.0178549	-0.0188661	-0.0338523	-0.019961	-0.0250201
0.666	0.00375796	-0.00265971	-0.0284888	-0.0287985	-0.0497452	-0.043229	-0.0244966	-0.0184704	-0.0196108	-0.0344778	-0.0194221	-0.0248594
0.667	0.00423554	-0.00279301	-0.0275892	-0.0317732	-0.0481747	-0.0426668	-0.0234405	-0.0192463	-0.0202967	-0.0348494	-0.0188428	-0.0249076
0.668	0.0047194	-0.00281448	-0.0264888	-0.0348318	-0.046478	-0.0427095	-0.0221511	-0.0202102	-0.0208533	-0.0346635	-0.0184184	-0.0251104
0.669	0.00512807	-0.00272297	-0.0252477	-0.0379075	-0.0448546	-0.0432817	-0.0208482	-0.0211221	-0.0212035	-0.034052	-0.018157	-0.0254579
0.67	0.00546686	-0.00261273	-0.0240451	-0.0406403	-0.0434053	-0.0440701	-0.0194664	-0.0217408	-0.0214107	-0.0336256	-0.0178807	-0.0259725
0.671	0.00576969	-0.00255377	-0.0230731	-0.0426404	-0.0421863	-0.0450491	-0.0180471	-0.022022	-0.0215564	-0.0337015	-0.0174775	-0.0266945
0.672	0.00598967	-0.00248179	-0.0224584	-0.0435646	-0.0412581	-0.0463412	-0.0169565	-0.0219774	-0.0216225	-0.0340172	-0.0170472	-0.0276227
0.673	0.0060747	-0.00226632	-0.0222716	-0.0431914	-0.0406203	-0.0476661	-0.0164665	-0.0215955	-0.0216453	-0.0343934	-0.0168152	-0.0286814
0.674	0.00606865	-0.00186228	-0.0225004	-0.0414869	-0.039968	-0.0485407	-0.0164418	-0.0208617	-0.021705	-0.0350797	-0.0169097	-0.0297513
0.675	0.00605158	-0.00130999	-0.0229812	-0.0384783	-0.0388492	-0.0487149	-0.0166965	-0.0198438	-0.0216532	-0.036092	-0.0172308	-0.0306464
0.676	0.00609013	-0.000612026	-0.0234487	-0.0343556	-0.0372049	-0.0481166	-0.0173429	-0.0187948	-0.0212353	-0.0369248	-0.0176431	-0.0311416
0.677	0.00621138	0.000268283	-0.023738	-0.0295764	-0.0353561	-0.0468439	-0.0184578	-0.0180403	-0.0204854	-0.0373174	-0.0181377	-0.0311704
0.678	0.00633452	0.00126484	-0.0238709	-0.0245502	-0.033666	-0.0451284	-0.0196831	-0.0178236	-0.0196649	-0.0374991	-0.0186761	-0.0309001
0.679	0.00627686	0.00223724	-0.0239252	-0.0195119	-0.0324084	-0.0431079	-0.0206113	-0.0182584	-0.0188269	-0.0374795	-0.0190865	-0.0305326
0.68	0.00594105	0.00317272	-0.0238777	-0.014775	-0.0316739	-0.0408994	-0.0212915	-0.0192482	-0.0177371	-0.0369515	-0.0192225	-0.030138
0.681	0.00550148	0.00411054	-0.0236827	-0.0107564	-0.0313872	-0.038723	-0.0218709	-0.0205	-0.0163117	-0.0359507	-0.019114	-0.0296592
0.682	0.00524496	0.00497938	-0.023418	-0.00787746	-0.0314396	-0.0367824	-0.0221104	-0.0217344	-0.0148022	-0.0348893	-0.0188713	-0.0289517
0.683	0.00530908	0.0057083	-0.0231997	-0.00644891	-0.0316712	-0.0352435	-0.0217274	-0.0228577	-0.013444	-0.0338867	-0.0185177	-0.0278826
0.684	0.0056337	0.00629472	-0.0230844	-0.00632238	-0.0317862	-0.0342022	-0.0208822	-0.0238238	-0.0122628	-0.0326709	-0.0180151	-0.0264435
0.685	0.00601496	0.0067466	-0.0230322	-0.00695836	-0.0315407	-0.0335592	-0.0199745	-0.0244075	-0.0112759	-0.0312684	-0.0173711	-0.0247797
0.686	0.00630209	0.00707213	-0.0229036	-0.00793011	-0.0309738	-0.0330717	-0.0191284	-0.0242722	-0.010596	-0.0301537	-0.0166866	-0.0231111
0.687	0.00651319	0.00726668	-0.0226009	-0.00899445	-0.0302991	-0.0324864	-0.0181442	-0.0232578	-0.0103094	-0.0294849	-0.0161177	-0.0215979
0.688	0.00668909	0.00732987	-0.0221542	-0.00997747	-0.0297456	-0.0317026	-0.0169387	-0.0215871	-0.0103934	-0.0288696	-0.0158154	-0.0203393
0.689	0.0068411	0.00730728	-0.0216832	-0.0107231	-0.0294795	-0.030815	-0.0156584	-0.0197017	-0.0107285	-0.0281762	-0.0159307	-0.0193979
0.69	0.0069971	0.00724999	-0.02131	-0.0108861	-0.0295309	-0.0298458	-0.0143618	-0.017909	-0.0111692	-0.0278376	-0.0165183	-0.0187785
0.691	0.00716038	0.0071543	-0.0210766	-0.0101028	-0.0298126	-0.0286152	-0.0130053	-0.0162985	-0.0115985	-0.0281365	-0.0174412	-0.018477
0.692	0.00735745	0.00694438	-0.0209218	-0.00844725	-0.0301781	-0.0270099	-0.0117122	-0.0148787	-0.0119054	-0.0289495	-0.0184937	-0.0184329
0.693	0.00768562	0.00654477	-0.0206842	-0.0062883	-0.0304519	-0.0251128	-0.0107654	-0.0136689	-0.011992	-0.030108	-0.0195059	-0.0184551
0.694	0.00818612	0.00598708	-0.0201949	-0.00386631	-0.0304656	-0.023055	-0.0102795	-0.012642	-0.0118969	-0.0313934	-0.0203361	-0.0183658
0.695	0.00884609	0.0053593	-0.0193981	-0.00132694	-0.0301125	-0.02102	-0.0101058	-0.0117349	-0.011789	-0.032388	-0.0208736	-0.0181208
0.696	0.00969571	0.00476546	-0.0183611	0.00108901	-0.0293678	-0.0192491	-0.0101163	-0.0109742	-0.0117772	-0.0326971	-0.0210164	-0.0177122
0.697	0.0107058	0.00436611	-0.0171946	0.00314388	-0.0282622	-0.01788	-0.010354	-0.0104163	-0.0118736	-0.0322477	-0.0206678	-0.0171009
0.698	0.0117419	0.00425557	-0.0159687	0.00477501	-0.0268202	-0.0169671	-0.010795	-0.0100214	-0.0119791	-0.0311469	-0.0198432	-0.016289
0.699	0.0126496	0.00436273	-0.0147165	0.00612343	-0.0250522	-0.0166062	-0.0111488	-0.00967437	-0.0118824	-0.0293841	-0.0186895	-0.0153531
0.7	0.0132912	0.00454408	-0.0134809	0.00739657	-0.022997	-0.0168154	-0.011183	-0.00924524	-0.0114856	-0.026925	-0.0173487	-0.0144093
0.701	0.0135851	0.00463891	-0.0123073	0.00856726	-0.0207505	-0.0174156	-0.0109457	-0.00860475	-0.0108454	-0.0239279	-0.0159045	-0.0136124
0.702	0.0135573	0.00448625	-0.01125	0.00938619	-0.0185525	-0.0181488	-0.0104823	-0.00769052	-0.00989568	-0.0206673	-0.0144304	-0.013147
0.703	0.0133248	0.00404105	-0.0103982	0.00980452	-0.0166894	-0.0188503	-0.00977329	-0.00655329	-0.00835484	-0.0173153	-0.0129559	-0.0131584
0.704	0.0129385	0.00341771	-0.00980628	0.0100215	-0.0152598	-0.0195497	-0.0088837	-0.00522112	-0.00608136	-0.0139871	-0.0114865	-0.0135821
0.705	0.0123739	0.00278569	-0.00948189	0.0101504	-0.0142062	-0.020339	-0.00791522	-0.00370332	-0.00340986	-0.0109138	-0.0102025	-0.0140929
0.706	0.0117032	0.00226209	-0.00944112	0.0101829	-0.0135122	-0.0211223	-0.00693292	-0.00214629	-0.000929368	-0.00829618	-0.00940392	-0.0143763
0.707	0.0110794	0.0018735	-0.00962575	0.0101306	-0.0133029	-0.0217575	-0.00600342	-0.000746858	0.00091158	-0.00607758	-0.00917043	-0.0143922
0.708	0.0106662	0.00161748	-0.00988888	0.0100122	-0.0137284	-0.0223071	-0.00528	0.000412289	0.00185508	-0.00410013	-0.00937015	-0.0143212
0.709	0.0106349	0.0014882	-0.0100618	0.00984554	-0.0147805	-0.0228215	-0.00489596	0.00132958	0.001815	-0.00251835	-0.00991424	-0.0142949
0.71	0.0110299	0.00146846	-0.00997441	0.00967281	-0.0162646	-0.0231506	-0.0047451	0.00190106	0.000952876	-0.00179657	-0.0107259	-0.0143078
0.711	0.0117083	0.00156066	-0.00953623	0.00940304	-0.0178999	-0.0231617	-0.00466544	0.00190171	-0.000437018	-0.0021528	-0.0115876	-0.0143365
0.712	0.0125551	0.0017193	-0.00878249	0.00875978	-0.0194489	-0.0228859	-0.0047661	0.00126658	-0.00212058	-0.00327995	-0.0121241	-0.0143585
0.713	0.0135773	0.00179677	-0.00785103	0.00756523	-0.0207279	-0.0224623	-0.00524835	0.000139071	-0.00393525	-0.00472579	-0.011957	-0.0143917
0.714	0.0147795	0.00163508	-0.00688287	0.00587108	-0.0215128	-0.0221092	-0.00601267	-0.00135631	-0.00570156	-0.00631354	-0.0109907	-0.0145024
0.715	0.0160897	0.0012009	-0.00588445	0.00382255	-0.0215409	-0.0219967	-0.00670667	-0.0030949	-0.00720834	-0.00802242	-0.00951889	-0.0146206
0.716	0.0174027	0.000678377	-0.00485689	0.00144447	-0.0207073	-0.0219826	-0.00723595	-0.00490036	-0.00835069	-0.0097005	-0.00796979	-0.0146204
0.717	0.0186794	0.000333512	-0.00395776	-0.0014273	-0.0191987	-0.0217712	-0.00791834	-0.00665752	-0.00921725	-0.0110476	-0.00668779	-0.0145651
0.718	0.0199337	0.00022542	-0.00331505	-0.00479496	-0.0173328	-0.0214955	-0.00890125	-0.00823764	-0.00993505	-0.0117364	-0.00588306	-0.0145527
0.719	0.0211245	0.000219537	-0.00287751	-0.00835229	-0.01537	-0.0215993	-0.00981585	-0.00938224	-0.0104569	-0.0115475	-0.00554424	-0.0145853
0.72	0.0221927	0.000226932	-0.00251544	-0.0118246	-0.0134741	-0.0221137	-0.0101179	-0.00988994	-0.0106355	-0.0103389	-0.00558077	-0.0146906
0.721	0.0231647	0.000305399	-0.00213589	-0.0150448	-0.0118486	-0.0226411	-0.00944569	-0.00980152	-0.0105489	-0.00786857	-0.00601488	-0.0148488
0.722	0.0241081	0.000573977	-0.0017375	-0.0177798	-0.0107728	-0.0229336	-0.00780169	-0.00930601	-0.0104538	-0.00387297	-0.00683537	-0.0149945
0.723	0.0249668	0.00106415	-0.00142361	-0.0198522	-0.0103128	-0.0230616	-0.00566276	-0.00851865	-0.0104124	0.00126085	-0.00792084	-0.0151204
0.724	0.0254995	0.00173298	-0.00134478	-0.0213012	-0.0102692	-0.0230263	-0.00373493	-0.00741068	-0.0103926	0.00603547	-0.00919013	-0.0151083
0.725	0.0254432	0.00258817	-0.0015439	-0.0221982	-0.0104842	-0.0225853	-0.00242487	-0.00601722	-0.0105852	0.00890512	-0.0106456	-0.0145667
0.726	0.0246944	0.00369227	-0.00188353	-0.0225533	-0.0109488	-0.0216599	-0.00174099	-0.0045016	-0.0112286	0.0096068	-0.0122369	-0.0130393
0.727	0.0233271	0.00499355	-0.00216775	-0.0224776	-0.0116319	-0.0204978	-0.00164505	-0.00300235	-0.0122409	0.00870853	-0.0137751	-0.0104773
0.728	0.0214995	0.00626005	-0.0022415	-0.0220973	-0.0124423	-0.019253	-0.00207293	-0.00174754	-0.0132618	0.00643518	-0.0150277	-0.00738956
0.729	0.0194039	0.00726245	-0.00197508	-0.0213152	-0.0133214	-0.0178294	-0.00277335	-0.00113899	-0.0140266	0.00268664	-0.0158584	-0.00445883
0.73	0.0173086	0.00785417	-0.00130723	-0.0198825	-0.014164	-0.016233	-0.00341934	-0.00138763	-0.0145294	-0.00217907	-0.0161989	-0.00217644
0.731	0.0155192	0.00792871	-0.000370918	-0.0177506	-0.0148738	-0.014701	-0.00381821	-0.00228502	-0.0148205	-0.00737574	-0.0159124	-0.000732385
0.732	0.0142763	0.00746046	0.000527966	-0.0151631	-0.0155004	-0.0134786	-0.00409826	-0.00348276	-0.0147968	-0.0124935	-0.0149213	-3.00972e-05
0.733	0.0137035	0.00656781	0.00111488	-0.0123635	-0.0160192	-0.0126719	-0.00457357	-0.0047826	-0.0143137	-0.0174831	-0.0133945	0.000143047
0.734	0.0137896	0.00549874	0.00128327	-0.00952688	-0.0162496	-0.0122371	-0.0053444	-0.00604255	-0.0134632	-0.0218472	-0.0116254	-0.000106353
0.735	0.0143936	0.00450022	0.00111755	-0.00695374	-0.0161069	-0.0121368	-0.00627343	-0.00697861	-0.012478	-0.0248093	-0.00984764	-0.000821294
0.736	0.0153159	0.00372836	0.000840762	-0.00506446	-0.015692	-0.0124376	-0.00725216	-0.00730656	-0.0113976	-0.0262354	-0.00815768	-0.00198594
0.737	0.016327	0.00327205	0.000600338	-0.00418939	-0.0152045	-0.0131175	-0.00818236	-0.00699014	-0.0101735	-0.0265606	-0.00658253	-0.00337132
0.738	0.0170811	0.00314661	0.000375713	-0.00445802	-0.0148493	-0.0140056	-0.0088749	-0.00627412	-0.00901248	-0.0259984	-0.00517235	-0.00480482
0.739	0.0172747	0.00326313	0.00014056	-0.0058601	-0.0147185	-0.0150068	-0.00925253	-0.00543301	-0.00820903	-0.0244701	-0.00399015	-0.00634685
0.74	0.0169023	0.00349467	-6.0565e-05	-0.00821595	-0.0147561	-0.0161426	-0.0094149	-0.00443141	-0.00778322	-0.0221697	-0.00308459	-0.00795703
0.741	0.0161309	0.00378975	-0.000126344	-0.0111508	-0.014898	-0.0173321	-0.00937382	-0.00312552	-0.00759762	-0.0196532	-0.00251327	-0.00937166
0.742	0.0150509	0.00415357	2.10267e-05	-0.0143117	-0.0151663	-0.0183201	-0.00896458	-0.00167992	-0.00759535	-0.0173482	-0.00237841	-0.0104329
0.743	0.0136734	0.00456749	0.000331722	-0.0175623	-0.0156161	-0.018857	-0.00808481	-0.00043764	-0.00779163	-0.0153115	-0.00270084	-0.0111906
0.744	0.0121173	0.00498679	0.000690938	-0.0209197	-0.0162787	-0.0189618	-0.00695217	0.000406355	-0.00817062	-0.01354	-0.00332285	-0.0117057
0.745	0.010635	0.00534769	0.000974721	-0.0243414	-0.0171674	-0.0189144	-0.00600864	0.000867358	-0.00859818	-0.0123845	-0.00408724	-0.0120203
0.746	0.00945918	0.00557884	0.00108379	-0.0276393	-0.0182455	-0.0189002	-0.00546734	0.00104244	-0.00885356	-0.0122745	-0.00495471	-0.0122541
0.747	0.00877339	0.00566179	0.000997406	-0.0305649	-0.0193543	-0.0188549	-0.0051932	0.000973435	-0.00888459	-0.0129788	-0.00588509	-0.0125315
0.748	0.00868792	0.00562323	0.000729205	-0.0328354	-0.0202836	-0.0186389	-0.00509211	0.000687554	-0.00894041	-0.01375	-0.00673466	-0.0127848
0.749	0.00912713	0.00547988	0.000398391	-0.0340849	-0.0209611	-0.018191	-0.00518899	0.000272066	-0.00923385	-0.014182	-0.00728153	-0.0127683
0.75	0.00992925	0.00526176	0.000228494	-0.0337511	-0.0214589	-0.0175536	-0.00532419	-0.000199494	-0.00966581	-0.0143896	-0.00740253	-0.0123587
0.751	0.0109887	0.00501476	0.000261622	-0.031169	-0.0217652	-0.0168818	-0.00515339	-0.000691659	-0.0100072	-0.0143893	-0.00727503	-0.0116672
0.752	0.0121605	0.00476553	0.000355436	-0.026174	-0.0217263	-0.0163708	-0.00447581	-0.00113445	-0.0101256	-0.0137749	-0.00721446	-0.0108441
0.753	0.013244	0.00447156	0.000423845	-0.0194298	-0.0213301	-0.0159668	-0.00337205	-0.00140579	-0.00999263	-0.01225	-0.00734043	-0.0100207
0.754	0.0140231	0.00405292	0.000437648	-0.0120325	-0.0208157	-0.0153851	-0.00200125	-0.0013874	-0.00955271	-0.010151	-0.00757774	-0.00938961
0.755	0.0142842	0.00351576	0.000366197	-0.00500947	-0.0203641	-0.0146299	-0.000430932	-0.000981981	-0.00868745	-0.00807458	-0.00783265	-0.0090899
0.756	0.0140066	0.00293608	0.000173102	0.000984083	-0.0200181	-0.0140801	0.00120643	-0.000199325	-0.00749252	-0.00622458	-0.00807284	-0.00914679
0.757	0.0133842	0.00241779	-0.000225043	0.00572479	-0.0198942	-0.0139411	0.00259028	0.000709129	-0.00634941	-0.00458154	-0.0082369	-0.00957233
0.758	0.0125588	0.00207163	-0.0009059	0.00927462	-0.0201009	-0.013967	0.00345615	0.00143497	-0.00546216	-0.00350712	-0.00817311	-0.0102395
0.759	0.0115563	0.0019524	-0.00179043	0.0117558	-0.0205618	-0.0138013	0.00373524	0.00185142	-0.00475189	-0.00342632	-0.0078366	-0.0108112
0.76	0.0104524	0.00209098	-0.00264095	0.0130283	-0.0210658	-0.0134019	0.00345615	0.00195631	-0.00424676	-0.00399014	-0.00739946	-0.0110005
0.761	0.00937839	0.00249907	-0.00322352	0.0126046	-0.0214422	-0.0129499	0.00282659	0.00182126	-0.00407876	-0.00445141	-0.00706924	-0.0107353
0.762	0.00840645	0.00306694	-0.00342892	0.0102605	-0.021694	-0.0124963	0.00230692	0.00159004	-0.00421747	-0.00467785	-0.0069127	-0.0100961
0.763	0.00757643	0.00356491	-0.00332634	0.00651501	-0.0218962	-0.012042	0.0022353	0.00131681	-0.00448032	-0.00491347	-0.00687175	-0.00922813
0.764	0.00698347	0.00382063	-0.00306293	0.00214523	-0.0220132	-0.0117717	0.00251508	0.000916893	-0.00470671	-0.00497494	-0.00689345	-0.00824099
0.765	0.00671169	0.00385037	-0.00267095	-0.0023681	-0.0219722	-0.0118648	0.00293393	0.000367864	-0.00481826	-0.00448034	-0.00690746	-0.00716925
0.766	0.00665809	0.00379592	-0.00207213	-0.0067707	-0.0217898	-0.0122476	0.00340578	-0.000231832	-0.00478615	-0.00355653	-0.00669615	-0.00610078
0.767	0.00654769	0.00377489	-0.00121858	-0.0108734	-0.0214834	-0.0126998	0.00378922	-0.000786931	-0.00464837	-0.00270845	-0.00605714	-0.0052802
0.768	0.00617425	0.0038126	-0.000168508	-0.0145318	-0.0210197	-0.0130698	0.00389019	-0.00124727	-0.00447583	-0.00209238	-0.00503648	-0.00492295
0.769	0.00556447	0.00390265	0.000963069	-0.0177698	-0.0204313	-0.0133605	0.00365965	-0.00158826	-0.00423738	-0.00154925	-0.00380388	-0.00498613
0.77	0.00493361	0.00406204	0.00206665	-0.0209915	-0.0197993	-0.0136772	0.00318059	-0.00176808	-0.0037795	-0.00121133	-0.00247361	-0.0053223
0.771	0.00450967	0.00430522	0.00301784	-0.0246311	-0.0190912	-0.0139986	0.00256393	-0.0016528	-0.00300162	-0.0013064	-0.00122428	-0.00586751
0.772	0.00443282	0.00457866	0.00370096	-0.0285647	-0.0182465	-0.0141464	0.00190525	-0.00111761	-0.00199262	-0.0016551	-0.000338845	-0.00655058
0.773	0.00475481	0.00475482	0.00405259	-0.0322154	-0.0173779	-0.0141419	0.00119507	-0.000264821	-0.000935581	-0.00196095	0.000108671	-0.00729187
0.774	0.0054013	0.00474905	0.00400906	-0.0350191	-0.0166796	-0.0141941	0.000407493	0.000655647	9.64978e-05	-0.00217934	0.000334296	-0.00806455
0.775	0.00625557	0.00458156	0.003528	-0.0366511	-0.0162554	-0.0142947	-0.000346602	0.00147665	0.00108482	-0.00234128	0.000507189	-0.00883961
0.776	0.00727785	0.00427033	0.00270131	-0.0370587	-0.0160524	-0.0143012	-0.000939851	0.00211472	0.00186944	-0.00254095	0.000594921	-0.00955007
0.777	0.00838215	0.00375553	0.0017064	-0.0363842	-0.0157143	-0.0143275	-0.00136411	0.00250206	0.00227485	-0.00313627	0.000515837	-0.0101304
0.778	0.00935317	0.00298931	0.000760947	-0.0348205	-0.0147456	-0.0145933	-0.00166121	0.00257573	0.00225305	-0.0043687	0.000243428	-0.010583
0.779	0.0100127	0.00202003	0.00014372	-0.03256	-0.0130121	-0.0150333	-0.00175659	0.00226898	0.00182555	-0.0058646	-0.000207729	-0.0109344
0.78	0.0103	0.00093063	-1.21253e-05	-0.0297701	-0.0107849	-0.01542	-0.00160234	0.00153821	0.00106466	-0.00698571	-0.000780554	-0.0111562
0.781	0.0101931	-0.000196983	0.000161689	-0.0266094	-0.00848557	-0.0156714	-0.00144648	0.000412179	7.14702e-05	-0.00760899	-0.00135223	-0.011216
0.782	0.00971738	-0.00125471	0.000476457	-0.0233262	-0.00655251	-0.0157858	-0.00147649	-0.000973813	-0.00100899	-0.00818313	-0.00181107	-0.0111134
0.783	0.00898404	-0.00215516	0.000787016	-0.0201712	-0.00526996	-0.0157559	-0.00145255	-0.00242522	-0.00195566	-0.00886263	-0.002213	-0.010817
0.784	0.00815199	-0.00280786	0.000913498	-0.017304	-0.00473487	-0.0157124	-0.00113674	-0.00378128	-0.00258793	-0.00903148	-0.00267474	-0.01031
0.785	0.00737898	-0.00310908	0.000719312	-0.0149037	-0.00491785	-0.0158126	-0.000678036	-0.00496004	-0.00285218	-0.00815729	-0.00313622	-0.00970466
0.786	0.00677736	-0.00308094	0.000268121	-0.0130435	-0.00564317	-0.0159894	-0.000296372	-0.00594029	-0.00273384	-0.0067158	-0.00349208	-0.00916196
0.787	0.00636086	-0.00285411	-0.000239255	-0.0114412	-0.00669417	-0.0161002	2.56855e-05	-0.00673325	-0.00223886	-0.00547984	-0.0037513	-0.00874949
0.788	0.0060587	-0.00251909	-0.000691396	-0.00952039	-0.00793899	-0.0161642	0.00028321	-0.00738497	-0.00142894	-0.00437052	-0.00395523	-0.0084657
0.789	0.00584328	-0.00212421	-0.00111459	-0.00667446	-0.00929679	-0.0162665	0.00017355	-0.00793865	-0.000368612	-0.00285608	-0.00419872	-0.00833962
0.79	0.00580768	-0.00174196	-0.00150954	-0.00264198	-0.0106963	-0.01636	-0.000593208	-0.00841766	0.000838366	-0.000687897	-0.00463574	-0.00840526
0.791	0.00605184	-0.00138114	-0.00184911	0.00230024	-0.0121428	-0.0162229	-0.00184344	-0.00880385	0.00208166	0.00230512	-0.00533415	-0.00858323
0.792	0.00656713	-0.000907932	-0.00216644	0.00749077	-0.0136988	-0.015561	-0.00303984	-0.00897297	0.00339806	0.00636575	-0.00621953	-0.00870122
0.793	0.00730782	-0.000262467	-0.00248591	0.0121617	-0.0153211	-0.0142929	-0.00374683	-0.00880672	0.00479632	0.0114257	-0.00712535	-0.00861386
0.794	0.00821312	0.00043815	-0.00282753	0.0157998	-0.0168697	-0.0127705	-0.00387451	-0.00828752	0.00599024	0.0168163	-0.00786908	-0.00828086
0.795	0.00913734	0.00111901	-0.00324276	0.0183493	-0.0181817	-0.0114021	-0.00352404	-0.00736594	0.00659852	0.0215693	-0.00838036	-0.00778071
0.796	0.00996423	0.00181205	-0.00368772	0.0200785	-0.0190166	-0.0101834	-0.00277011	-0.00592883	0.00648678	0.0250453	-0.00871509	-0.00719299
0.797	0.0107219	0.00257194	-0.00398814	0.0213078	-0.0192139	-0.00898339	-0.0017502	-0.00395234	0.00579026	0.02697	-0.00887103	-0.00654854
0.798	0.0114945	0.00340483	-0.0039752	0.0221506	-0.0187918	-0.00792394	-0.000748304	-0.00154969	0.00474234	0.0270075	-0.00874933	-0.00596759
0.799	0.0123292	0.00415931	-0.00359052	0.0224118	-0.0177313	-0.0071567	2.30306e-05	0.00114634	0.0035204	0.0248337	-0.00833027	-0.00564456
0.8	0.013201	0.00463343	-0.00289533	0.0217274	-0.0160408	-0.00665954	0.000530376	0.00395934	0.00222631	0.0204991	-0.00775283	-0.00563347
0.801	0.0140384	0.00478715	-0.0020023	0.0198555	-0.0139004	-0.00642533	0.000849918	0.00650403	0.00107583	0.0145591	-0.00724385	-0.00574773
0.802	0.0148106	0.00465726	-0.0010077	0.0169295	-0.0115015	-0.00654213	0.00114717	0.0083384	0.000427389	0.00794379	-0.00690075	-0.00578729
0.803	0.0154773	0.0042418	-6.87296e-06	0.013286	-0.00902902	-0.00691075	0.00151739	0.00931744	0.00044121	0.0014959	-0.00659482	-0.00581363
0.804	0.0159347	0.00361001	0.000833093	0.00915953	-0.00676309	-0.00713318	0.00185993	0.00953779	0.000932035	-0.00442709	-0.0062781	-0.00599354
0.805	0.016134	0.00295699	0.00130367	0.00493921	-0.00498447	-0.0069162	0.00208378	0.00906312	0.00162593	-0.0097124	-0.00608529	-0.00636875
0.806	0.0160831	0.00246364	0.00131431	0.00139294	-0.00385504	-0.00648926	0.00220304	0.00794339	0.00241121	-0.0139385	-0.00608685	-0.00693012
0.807	0.0157437	0.00223827	0.000952442	-0.000820862	-0.00339961	-0.00641511	0.00216267	0.00630331	0.00332715	-0.0165014	-0.0062387	-0.00766423
0.808	0.0150608	0.00235562	0.000382261	-0.00158354	-0.0035511	-0.00682179	0.00177865	0.00440234	0.00437058	-0.0174843	-0.00650097	-0.00844978
0.809	0.0140267	0.00278067	-0.000234344	-0.00103203	-0.0042697	-0.00722322	0.00094549	0.00262391	0.00540981	-0.0177716	-0.00691639	-0.00904202
0.81	0.0126717	0.00336965	-0.000720528	0.000714878	-0.00558515	-0.00739278	-9.52136e-05	0.00115984	0.0062331	-0.0178952	-0.00751437	-0.00924549
0.811	0.0111199	0.00394381	-0.000925737	0.00344402	-0.00742444	-0.00759903	-0.000989288	-7.71725e-05	0.00659011	-0.0175737	-0.00816498	-0.00900761
0.812	0.00964007	0.00434508	-0.00081775	0.00686108	-0.0095395	-0.00786808	-0.00177623	-0.0010801	0.00632469	-0.0166883	-0.00856279	-0.00838383
0.813	0.00851426	0.00454023	-0.000464759	0.0106449	-0.0117121	-0.00796281	-0.00263203	-0.00166891	0.00552504	-0.0157334	-0.00835968	-0.00756247
0.814	0.00794112	0.0046198	2.62077e-05	0.0144172	-0.0137865	-0.00795559	-0.00326673	-0.00180105	0.00448001	-0.0150814	-0.00743027	-0.00673738
0.815	0.00803527	0.00471214	0.000531298	0.0178725	-0.0155305	-0.00812036	-0.00324579	-0.00164898	0.00345599	-0.0145576	-0.00597501	-0.00597967
0.816	0.00874712	0.00492598	0.000948846	0.0208734	-0.0167064	-0.00843557	-0.0026336	-0.00136477	0.00254546	-0.0139789	-0.00436024	-0.0053578
0.817	0.00981389	0.00526831	0.00126749	0.0232871	-0.0172151	-0.00871818	-0.0017614	-0.000935575	0.00181454	-0.013531	-0.00296904	-0.00491906
0.818	0.0108829	0.00562529	0.00155728	0.0247963	-0.0170671	-0.00904586	-0.000761018	-0.00034344	0.00139821	-0.0133422	-0.00206275	-0.00460029
0.819	0.0117008	0.00593716	0.00188959	0.0249943	-0.0161346	-0.00955332	0.000316019	0.00036703	0.00130599	-0.0132806	-0.00164377	-0.00432953
0.82	0.0121698	0.00631867	0.00226678	0.0236561	-0.0141081	-0.0101323	0.00132206	0.00122829	0.00139064	-0.0132933	-0.00159093	-0.0040351
0.821	0.0122629	0.00690864	0.00259781	0.0208481	-0.0109173	-0.0106577	0.00213895	0.00225794	0.00152217	-0.01339	-0.00181011	-0.0036187
0.822	0.0119701	0.00773916	0.00278476	0.0168284	-0.00705135	-0.0112132	0.00275099	0.00329322	0.0016442	-0.0133628	-0.002143	-0.00308367
0.823	0.0113484	0.00876821	0.0028054	0.0121164	-0.00333503	-0.0118264	0.00315955	0.00408617	0.00179532	-0.0129782	-0.00244542	-0.00258573
0.824	0.0105572	0.00986378	0.00270307	0.00775227	-0.000468901	-0.0121317	0.00341655	0.00452282	0.00208835	-0.012302	-0.00276328	-0.00234348
0.825	0.00975186	0.0108252	0.00256039	0.00494916	0.0011486	-0.0117218	0.00373762	0.00470598	0.00253891	-0.0114758	-0.00310047	-0.00250348
0.826	0.00900251	0.0114752	0.00244483	0.00417768	0.00144736	-0.0107109	0.00431371	0.00475349	0.00299811	-0.0104592	-0.00316435	-0.00300085
0.827	0.00835996	0.0116316	0.00243932	0.00495594	0.000738125	-0.0094491	0.00502147	0.00468986	0.00332693	-0.00933551	-0.00274596	-0.00355576
0.828	0.00789973	0.0111942	0.00267665	0.00649415	-0.000513759	-0.00797137	0.00552481	0.00468119	0.00349086	-0.00840721	-0.00205988	-0.00382887
0.829	0.00763334	0.010318	0.00320402	0.00820076	-0.00200652	-0.0062158	0.00562385	0.00489728	0.00342723	-0.00766067	-0.00137937	-0.00364171
0.83	0.00743251	0.00929024	0.00396198	0.00979474	-0.00358266	-0.00434205	0.00530878	0.00510146	0.00299082	-0.00669005	-0.000739292	-0.00309497
0.831	0.00713619	0.00831562	0.00481486	0.0111343	-0.00514013	-0.00250551	0.00451563	0.0049284	0.00212044	-0.00538382	-0.000115917	-0.00246579
0.832	0.00667843	0.00749255	0.00554715	0.012007	-0.00665752	-0.000730434	0.00313076	0.00440103	0.00097666	-0.00408676	0.000365657	-0.00201966
0.833	0.00611927	0.00687577	0.00601022	0.0123535	-0.00806409	0.000870945	0.00130156	0.00381675	-0.000132942	-0.00290778	0.000491741	-0.00184657
0.834	0.00564285	0.00649934	0.0061653	0.0124599	-0.00917163	0.00204797	-0.000484781	0.00334395	-0.000905447	-0.00142519	0.000293321	-0.00189516
0.835	0.00542455	0.00635772	0.00604816	0.0125601	-0.00988723	0.00261595	-0.00180788	0.00300539	-0.00110383	0.000639316	0.000123216	-0.00211817
0.836	0.0054689	0.00636052	0.00582062	0.0125443	-0.0103048	0.00260832	-0.00264196	0.00290262	-0.000634136	0.00288291	0.000232048	-0.00248393
0.837	0.00569755	0.00634043	0.00564431	0.0122041	-0.0105306	0.00216494	-0.00312697	0.00317475	0.000360361	0.00470125	0.000521048	-0.00303647
0.838	0.00603129	0.00621566	0.0054695	0.0114063	-0.0105975	0.00121878	-0.00325503	0.00385369	0.0015841	0.0060021	0.000781145	-0.00384985
0.839	0.00633224	0.00606678	0.0051665	0.0101417	-0.010528	-0.000405021	-0.00300802	0.00488217	0.0027061	0.00706767	0.000917423	-0.00476546
0.84	0.00656508	0.0059655	0.00476447	0.00872296	-0.0103358	-0.00243791	-0.00260979	0.00611445	0.0034124	0.00780773	0.000937217	-0.00550882
0.841	0.0069068	0.00583885	0.00437912	0.00770975	-0.0100343	-0.00415104	-0.00226447	0.00732832	0.00360517	0.00775425	0.000885516	-0.00608756
0.842	0.00746958	0.00555097	0.00410824	0.007509	-0.00971878	-0.00503076	-0.00180093	0.00839097	0.00351492	0.0069067	0.00077125	-0.0066659
0.843	0.00805613	0.00505799	0.00403532	0.00813636	-0.00957103	-0.00522433	-0.00101449	0.00927916	0.00337471	0.0058124	0.000602868	-0.00717755
0.844	0.00835265	0.00440885	0.00415027	0.00932262	-0.00975351	-0.00528947	-0.000179237	0.00992808	0.00314131	0.00471781	0.000495753	-0.00741822
0.845	0.0082872	0.00366203	0.00429418	0.0107774	-0.0102633	-0.00560149	0.00019338	0.0102983	0.00268414	0.00330321	0.000557213	-0.00735446
0.846	0.00801209	0.00293817	0.00425712	0.012435	-0.0109432	-0.0060722	6.21706e-05	0.0104236	0.00202618	0.00141164	0.000735275	-0.00709591
0.847	0.0076873	0.00242964	0.00395264	0.0144642	-0.0116118	-0.00647469	-2.90709e-05	0.0102636	0.00132907	-0.000455987	0.000904906	-0.00667408
0.848	0.0075082	0.00225845	0.00347384	0.0168984	-0.0120552	-0.00673609	0.000323872	0.00977241	0.000744533	-0.00176413	0.000989395	-0.00606739
0.849	0.00773677	0.00243697	0.00296394	0.0194374	-0.012069	-0.00668657	0.00090249	0.00904811	0.000359078	-0.00258678	0.000972216	-0.00536609
0.85	0.00847801	0.00291308	0.00248562	0.0216714	-0.0116204	-0.00605732	0.00136208	0.00823173	0.000267291	-0.00316844	0.000818061	-0.00475798
0.851	0.00957594	0.00360425	0.00206059	0.0233237	-0.0108607	-0.00498264	0.00186429	0.00743336	0.000589113	-0.00323359	0.000474802	-0.00440361
0.852	0.0108076	0.00448059	0.00176216	0.0244014	-0.00996678	-0.00384418	0.0028322	0.00681255	0.00137315	-0.00220899	0.000110605	-0.00432918
0.853	0.0120077	0.00553263	0.00164872	0.0251715	-0.00899791	-0.00264738	0.00425802	0.00653329	0.00253524	6.46847e-06	9.94366e-05	-0.00446462
0.854	0.0130391	0.00660386	0.00168474	0.0258954	-0.00792206	-0.00116862	0.00569575	0.00662479	0.00395639	0.00305903	0.000522796	-0.00479291
0.855	0.0137535	0.00745807	0.00176016	0.0267018	-0.00672469	0.000465274	0.00688792	0.00701727	0.00557927	0.0067836	0.000960595	-0.00527878
0.856	0.013995	0.00798638	0.00173554	0.0276109	-0.00546064	0.00171449	0.00793928	0.0075981	0.00734546	0.0111923	0.000926149	-0.00577494
0.857	0.0137313	0.00821056	0.00155812	0.0285209	-0.00426754	0.00220764	0.00883743	0.00820201	0.00913779	0.0159975	0.000313575	-0.00626401
0.858	0.0131376	0.00824444	0.00133529	0.0293822	-0.00322565	0.00222157	0.00925066	0.00872398	0.0108156	0.0207263	-0.000641958	-0.00692569
0.859	0.0124504	0.0082953	0.0012241	0.0302365	-0.00207869	0.00229646	0.00900289	0.00907382	0.0122067	0.0253265	-0.00172109	-0.00781703
0.86	0.0118165	0.00856595	0.0013178	0.0310315	-0.000232602	0.00258056	0.00837958	0.00907466	0.0131078	0.0301318	-0.0028762	-0.00869889
0.861	0.011318	0.00909517	0.00161775	0.031729	0.0027501	0.00296287	0.00766044	0.00870893	0.013393	0.0351178	-0.0040006	-0.00918489
0.862	0.0110323	0.00976787	0.00193853	0.0323906	0.00666569	0.00361701	0.00666945	0.00812119	0.0130977	0.0396774	-0.00483839	-0.00906722
0.863	0.0110047	0.01051	0.00196818	0.0329905	0.0107461	0.00480138	0.00513996	0.00734698	0.0124365	0.0431439	-0.00529476	-0.0084671
0.864	0.0112174	0.0113184	0.00157188	0.033395	0.0141042	0.00624069	0.00332245	0.00646307	0.0116732	0.0452149	-0.00552995	-0.00760551
0.865	0.0115795	0.0121415	0.000840498	0.0334724	0.0161063	0.0073663	0.00184836	0.00568219	0.0108615	0.0458399	-0.00562772	-0.00662572
0.866	0.0119291	0.0128977	-0.000119191	0.0330877	0.0165518	0.00798782	0.00101572	0.00509221	0.00993704	0.0449696	-0.0054606	-0.00567213
0.867	0.0121295	0.0135718	-0.0012195	0.0321999	0.0156257	0.0081941	0.000627947	0.00464292	0.00896882	0.0427291	-0.00493759	-0.00489186
0.868	0.0121564	0.0142177	-0.00228437	0.0310489	0.0136918	0.00793962	0.000544236	0.00439136	0.0080292	0.0395806	-0.00414419	-0.00432836
0.869	0.0120678	0.0149675	-0.00305994	0.0300387	0.0111576	0.00713154	0.000905386	0.00448734	0.00704911	0.0358692	-0.00324352	-0.00392954
0.87	0.0118974	0.015989	-0.00338413	0.0293741	0.00837968	0.00590983	0.00181766	0.00489507	0.00597196	0.0315124	-0.00242047	-0.00365472
0.871	0.0115784	0.0173226	-0.00328679	0.0289777	0.00551943	0.00462872	0.0030834	0.00541848	0.00487585	0.0264695	-0.00179682	-0.00353099
0.872	0.0110621	0.018887	-0.00285029	0.0287701	0.00261461	0.00351811	0.00428784	0.00597721	0.00384509	0.0211979	-0.00130309	-0.00357003
0.873	0.0104866	0.0205348	-0.00207828	0.0288623	-0.000171183	0.00252954	0.00514262	0.00664001	0.00291747	0.0163413	-0.000822412	-0.00369614
0.874	0.0100649	0.0220642	-0.000991517	0.0293998	-0.00260266	0.00164739	0.00557332	0.00746946	0.00218715	0.0121217	-0.000386903	-0.00383223
0.875	0.00985882	0.0233521	0.000246399	0.0303285	-0.00458294	0.00102085	0.00552475	0.00841284	0.00175365	0.00838125	-6.56621e-05	-0.00394386
0.876	0.00979197	0.0243762	0.00138858	0.031431	-0.00610491	0.00067612	0.00498529	0.00932366	0.00168427	0.00502845	0.000175266	-0.00393218
0.877	0.00976222	0.0251033	0.00230487	0.0324945	-0.00715438	0.000464251	0.00407912	0.0100297	0.00203381	0.00203647	0.000414573	-0.00363225
0.878	0.00968137	0.0254946	0.0030718	0.0333605	-0.00775573	0.000381594	0.00299074	0.0103324	0.00278161	-0.000739612	0.000688796	-0.00297261
0.879	0.00951126	0.0255877	0.00379155	0.0339588	-0.00797952	0.00058055	0.00190873	0.0100295	0.00379768	-0.00341181	0.000998928	-0.00199745
0.88	0.0092217	0.0254925	0.00440107	0.0343664	-0.00781665	0.00102948	0.000976135	0.00912041	0.00483126	-0.00588839	0.00133716	-0.000762218
0.881	0.00876038	0.0253097	0.00476415	0.0346848	-0.00715205	0.00150869	0.000255763	0.00796619	0.00562664	-0.00806362	0.00162125	0.000647293
0.882	0.00813332	0.0251127	0.00487006	0.0349322	-0.00594476	0.00179378	-0.000157022	0.00700327	0.00606141	-0.00995269	0.00169368	0.0020591
0.883	0.00739166	0.0249618	0.00486343	0.0351774	-0.00431105	0.00165938	-6.24545e-05	0.00634967	0.00609052	-0.0113775	0.0015012	0.00325265
0.884	0.00655466	0.0248235	0.00491039	0.0355808	-0.00248569	0.000879094	0.000597329	0.00590502	0.00575506	-0.0119148	0.00122547	0.00404959
0.885	0.00565005	0.0245819	0.00506148	0.036186	-0.000779882	-0.000654701	0.00156963	0.0056793	0.00528891	-0.0114833	0.00121708	0.0044306
0.886	0.0047559	0.0241911	0.00525222	0.0368643	0.000602575	-0.00268121	0.00255196	0.00577538	0.00504429	-0.0105718	0.00173748	0.00450649
0.887	0.00391091	0.0237002	0.00541267	0.0375364	0.00165339	-0.00463075	0.00345154	0.00617285	0.00521398	-0.00966295	0.0027723	0.00436082
0.888	0.00310435	0.0231713	0.00553185	0.03816	0.00239958	-0.00613584	0.00435697	0.00676671	0.00573368	-0.00874608	0.00412454	0.00403804
0.889	0.00238462	0.0226327	0.00558453	0.0386125	0.00279065	-0.00718841	0.00530103	0.0075716	0.00652842	-0.00756475	0.0054602	0.00362273
0.89	0.00183786	0.0220872	0.00540999	0.0387968	0.00268348	-0.00779493	0.00605252	0.00864792	0.00758772	-0.00617105	0.00641773	0.00318197
0.891	0.00153617	0.0215095	0.00477277	0.0386416	0.00196817	-0.00789044	0.00626433	0.00986654	0.00883103	-0.00498224	0.00691848	0.00266542
0.892	0.00152881	0.0207819	0.00363949	0.0380954	0.000817731	-0.00756982	0.00586764	0.0110523	0.0101249	-0.00427568	0.00712191	0.00205373
0.893	0.00175448	0.0197903	0.00227383	0.0371704	-0.000416925	-0.00705414	0.00515333	0.0122291	0.0112656	-0.00384015	0.00710395	0.00148543
0.894	0.00203315	0.0186137	0.00101201	0.0358754	-0.00158664	-0.00646974	0.00445739	0.0134577	0.0119874	-0.00329687	0.00679125	0.00108588
0.895	0.00211513	0.017424	7.77088e-05	0.0342803	-0.00273031	-0.00585128	0.00388733	0.0146091	0.0121778	-0.00268186	0.00614745	0.000934138
0.896	0.00177403	0.0162903	-0.000458388	0.0325808	-0.00380868	-0.00528782	0.0032714	0.0154398	0.0118845	-0.00241111	0.00530138	0.00107931
0.897	0.00106878	0.0152053	-0.000625761	0.0309495	-0.00469238	-0.00494685	0.0023725	0.0158036	0.0111829	-0.00268063	0.00446447	0.00131951
0.898	0.000314015	0.0141467	-0.000471149	0.0294402	-0.00534415	-0.00490278	0.00123055	0.015714	0.010284	-0.00326455	0.00375261	0.00131851
0.899	-0.000269139	0.0131165	-4.05643e-05	0.0279893	-0.00584157	-0.00506762	0.000210333	0.0151973	0.00948432	-0.00389446	0.00317543	0.000992704
0.9	-0.000587413	0.0120912	0.000601715	0.026397	-0.00621302	-0.00540315	-0.000357602	0.0142038	0.00889487	-0.0044363	0.00278865	0.000467088
0.901	-0.000501353	0.0109081	0.00137068	0.0244281	-0.00636751	-0.00596903	-0.000455932	0.0128095	0.00849002	-0.00471466	0.00265692	-0.00016009
0.902	8.42783e-05	0.00949971	0.00224525	0.0219542	-0.00620477	-0.00660145	-0.000228768	0.0113218	0.0082886	-0.00453234	0.00269839	-0.000896934
0.903	0.00108016	0.00808514	0.00330896	0.0189735	-0.00578442	-0.00680195	0.0002793	0.0100069	0.00830004	-0.00393936	0.00271598	-0.00181558
0.904	0.00229023	0.00694752	0.00460775	0.0155743	-0.0053082	-0.00618164	0.0011832	0.00895446	0.00843394	-0.00326405	0.00255226	-0.00287169
0.905	0.00350893	0.00623025	0.00601936	0.011913	-0.00499802	-0.00481739	0.00254362	0.00819761	0.00853028	-0.00276694	0.00225876	-0.00390264
0.906	0.0045827	0.00584775	0.00732374	0.0082116	-0.005038	-0.00301864	0.00414469	0.00779438	0.00846983	-0.00245599	0.00206074	-0.00487895
0.907	0.00539125	0.0056333	0.00836215	0.00477163	-0.00548534	-0.00105399	0.005706	0.00789612	0.00828922	-0.00231018	0.00201808	-0.0058878
0.908	0.00582849	0.0055839	0.00905822	0.00195316	-0.00627567	0.000825119	0.00705859	0.00859046	0.0081317	-0.00252466	0.0019027	-0.00685549
0.909	0.00591483	0.0057507	0.00936811	-1.52669e-05	-0.00727695	0.00242702	0.00796903	0.00965452	0.0080888	-0.00343035	0.00152819	-0.00753024
0.91	0.00576549	0.00606512	0.00932441	-0.00110684	-0.00823067	0.00369794	0.00829991	0.0107327	0.00816524	-0.00504482	0.000975582	-0.00766163
0.911	0.00549177	0.00643397	0.00906331	-0.00129681	-0.00880635	0.00460598	0.00823687	0.0116164	0.00834936	-0.00690849	0.000402346	-0.00707953
0.912	0.00523508	0.00686929	0.00872955	-0.000630039	-0.00884361	0.00513616	0.0079628	0.0122003	0.00867892	-0.00860031	-0.000110116	-0.00582155
0.913	0.0050891	0.00744706	0.00838812	0.000657411	-0.00838052	0.00539669	0.00745102	0.0124551	0.00915049	-0.0100648	-0.000437272	-0.00423474
0.914	0.00501089	0.00823788	0.0080715	0.00237812	-0.00741213	0.00552347	0.00672757	0.0125331	0.00952907	-0.0113541	-0.00042687	-0.00276948
0.915	0.00493705	0.00925808	0.00783419	0.004419	-0.00591191	0.00563341	0.00606945	0.0125926	0.0094534	-0.0123198	-1.77983e-05	-0.00174576
0.916	0.00488299	0.0103658	0.00769998	0.00647431	-0.00404239	0.00582169	0.00588155	0.0125713	0.00884595	-0.012749	0.000759235	-0.00127591
0.917	0.00492563	0.0113189	0.00763753	0.00801426	-0.00209392	0.00603908	0.00637936	0.0123256	0.00803551	-0.0127571	0.00179443	-0.00121193
0.918	0.00516941	0.0119244	0.00761087	0.00849167	-0.000435567	0.00615445	0.00735204	0.0117892	0.00729856	-0.0126539	0.00296318	-0.00134432
0.919	0.00573683	0.012083	0.00759295	0.00758138	0.000526486	0.00617556	0.00836454	0.0110006	0.00655311	-0.0125406	0.00409501	-0.00167606
0.92	0.00673228	0.0118021	0.00752062	0.00537763	0.000691986	0.00628858	0.00923038	0.01011	0.00571856	-0.0123752	0.00489335	-0.00225539
0.921	0.00820806	0.0111661	0.00732868	0.00240709	0.000310499	0.00666619	0.00999402	0.00925774	0.0050603	-0.012209	0.00512713	-0.00293197
0.922	0.010189	0.0103011	0.00707684	-0.000667347	-0.00032138	0.0072303	0.0105091	0.0084628	0.00494365	-0.0120733	0.00481057	-0.00344192
0.923	0.0126372	0.009325	0.00693635	-0.00342244	-0.00087929	0.00769069	0.0104791	0.00773126	0.0053967	-0.0117659	0.00407705	-0.00359272
0.924	0.0153941	0.0083382	0.00703823	-0.00573031	-0.00110276	0.00787779	0.0099094	0.00714122	0.006096	-0.0110175	0.00308552	-0.0034819
0.925	0.0181923	0.00745166	0.00741349	-0.00754446	-0.0010814	0.00788156	0.0091211	0.00669931	0.00670562	-0.00984659	0.00209647	-0.00348721
0.926	0.020738	0.00669823	0.00807738	-0.00882034	-0.00111424	0.00785204	0.00836987	0.00630703	0.00711491	-0.0085058	0.00131172	-0.00373846
0.927	0.0228387	0.00601368	0.00901325	-0.00959936	-0.00132644	0.00783728	0.00771551	0.00592545	0.00738219	-0.00703958	0.000689002	-0.00388914
0.928	0.0244438	0.0053815	0.00998774	-0.0100042	-0.00162262	0.00787231	0.00712182	0.00563726	0.00749237	-0.00529355	0.000209494	-0.00369479
0.929	0.0255967	0.00485221	0.0106237	-0.0100599	-0.00180827	0.00805315	0.00660834	0.005595	0.00734159	-0.00344099	-2.68494e-05	-0.00332375
0.93	0.0263805	0.00443261	0.0107069	-0.00958183	-0.001521	0.00831843	0.00633795	0.00585876	0.00694279	-0.00204864	-9.38317e-05	-0.00297552
0.931	0.0268673	0.00410651	0.0102699	-0.0084737	-0.000213765	0.00840381	0.00643726	0.00623221	0.00641199	-0.00149906	-0.000166457	-0.00266157
0.932	0.0271022	0.00390824	0.00947677	-0.00699786	0.00262068	0.00822416	0.00679599	0.00645822	0.00591488	-0.00154048	-0.000250475	-0.00230944
0.933	0.0271263	0.00388405	0.00855494	-0.00555125	0.00711726	0.0079439	0.00723093	0.00654016	0.00567951	-0.00160758	-0.000175621	-0.00187911
0.934	0.0270266	0.00405041	0.00775649	-0.00446697	0.0127278	0.00759304	0.00775348	0.0067447	0.00586016	-0.00153113	0.000199391	-0.00142149
0.935	0.0269458	0.0043644	0.00725805	-0.00407578	0.0183191	0.00697998	0.0085193	0.00734016	0.00650082	-0.00164838	0.00076397	-0.000977965
0.936	0.0270218	0.00471691	0.00709147	-0.00472038	0.0227367	0.00608925	0.00958652	0.00828835	0.00754433	-0.00215792	0.00130617	-0.000542017
0.937	0.0273237	0.00504392	0.00714792	-0.0066907	0.0252448	0.00529192	0.0107767	0.00932587	0.00867871	-0.00265399	0.00180337	-0.000178335
0.938	0.0277842	0.00537367	0.00723473	-0.0101344	0.0255884	0.00495748	0.0117846	0.0103467	0.00955543	-0.0026193	0.00228235	-8.64431e-06
0.939	0.028199	0.00571318	0.00720268	-0.0146081	0.0239451	0.00507279	0.012364	0.011439	0.0102323	-0.00213528	0.00259736	-9.3957e-05
0.94	0.0283488	0.00599053	0.00701496	-0.0187211	0.0207856	0.00545314	0.0123361	0.0126702	0.010962	-0.00173425	0.00262655	-0.000345465
0.941	0.0281011	0.00618418	0.00670689	-0.0211109	0.016649	0.00605905	0.0116843	0.0139847	0.0117254	-0.00166803	0.00251279	-0.000595378
0.942	0.0273672	0.0064593	0.00633905	-0.0214989	0.012057	0.00687677	0.0106987	0.0152335	0.012313	-0.00162087	0.00251645	-0.000804222
0.943	0.026057	0.00700086	0.00597507	-0.0204112	0.00748854	0.00775549	0.00968245	0.0162841	0.012701	-0.00125713	0.00270848	-0.00102184
0.944	0.024238	0.00774066	0.00567515	-0.0186952	0.00337113	0.00846819	0.00869174	0.0170831	0.0131419	-0.000737334	0.00295278	-0.00116883
0.945	0.0221676	0.00848409	0.00548812	-0.0171959	4.08308e-05	0.00887411	0.00782398	0.0176691	0.0137639	-0.000371972	0.00323807	-0.00109461
0.946	0.0200129	0.00919848	0.00548446	-0.0164127	-0.00240412	0.00898936	0.00742623	0.0181554	0.014275	-4.437e-05	0.00378989	-0.000787504
0.947	0.0178577	0.00999042	0.00574718	-0.0164812	-0.00408489	0.00874457	0.00773239	0.018586	0.014405	0.000559804	0.00466476	-0.0003389
0.948	0.0159112	0.0108915	0.00628955	-0.0172687	-0.00512259	0.00799089	0.00849541	0.0188119	0.0143462	0.00138298	0.00558154	0.000287565
0.949	0.0144272	0.011761	0.00707202	-0.0184785	-0.00557045	0.00684596	0.00923504	0.0185177	0.0143757	0.00212069	0.00632683	0.00130535
0.95	0.0136012	0.0124493	0.00800829	-0.0198789	-0.00553328	0.00555871	0.00979989	0.0174687	0.014403	0.00264598	0.00693689	0.00276644
0.951	0.0134976	0.0129625	0.00888078	-0.0213475	-0.0051442	0.00415556	0.0105186	0.0158505	0.0142614	0.00297788	0.00745728	0.00442028
0.952	0.0139593	0.0133933	0.00943286	-0.0226874	-0.00454154	0.00256582	0.0116543	0.0141568	0.0140766	0.00312276	0.00780517	0.0060249
0.953	0.0147238	0.0138067	0.00960266	-0.0236397	-0.00391921	0.000917248	0.0128877	0.0127514	0.0140512	0.00310955	0.00784091	0.00742099
0.954	0.0155927	0.0142082	0.00950088	-0.024012	-0.00334948	-0.000502486	0.0136749	0.0117367	0.0141982	0.0029937	0.00747606	0.00840507
0.955	0.016467	0.01453	0.00925121	-0.0236643	-0.00275876	-0.00144964	0.0138717	0.0110974	0.0143944	0.00290617	0.00673712	0.00877237
0.956	0.0173097	0.0146397	0.00890828	-0.0225904	-0.00215765	-0.00186579	0.0136908	0.0108043	0.0144931	0.00307362	0.00567248	0.00838886
0.957	0.0181083	0.0143895	0.00838875	-0.0210131	-0.00163728	-0.00191841	0.013326	0.0108465	0.0144085	0.00358946	0.00422143	0.00729703
0.958	0.0188028	0.0137145	0.00762136	-0.0190668	-0.00132116	-0.00178499	0.0128437	0.0112012	0.0141697	0.00429679	0.00244108	0.00581011
0.959	0.0192594	0.0127121	0.0066711	-0.0165744	-0.00137666	-0.00145891	0.0122693	0.0118137	0.0138737	0.00491486	0.000702252	0.00436711
0.96	0.0194064	0.0115754	0.00563768	-0.0134145	-0.00181191	-0.000918501	0.0116347	0.0126316	0.0136387	0.00517381	-0.000626434	0.00332145
0.961	0.0192551	0.0104885	0.00472009	-0.00974101	-0.00237795	-0.000319177	0.0110054	0.0135655	0.0135651	0.00494663	-0.00145454	0.00287617
0.962	0.0187664	0.00957892	0.00416279	-0.00580128	-0.00283773	0.000116381	0.0105189	0.0144311	0.0135906	0.00426609	-0.00184499	0.00301701
0.963	0.0179101	0.00887474	0.00401591	-0.00183941	-0.00316109	0.000292741	0.0103326	0.0149716	0.0135016	0.00320432	-0.00182583	0.00354704
0.964	0.0167983	0.00835005	0.00424681	0.0018977	-0.00337979	0.000282281	0.0104868	0.0150005	0.0131579	0.00187944	-0.00137163	0.00429672
0.965	0.0156288	0.00801593	0.00487784	0.00518176	-0.00347176	0.00025601	0.0108241	0.0145311	0.0125456	0.000516455	-0.000471589	0.00518054
0.966	0.0145931	0.00787512	0.00583018	0.00794634	-0.00347715	0.00039627	0.0111472	0.0137077	0.0117667	-0.000621098	0.000740014	0.00607015
0.967	0.0138878	0.00788412	0.00687097	0.0103651	-0.00351377	0.000840841	0.0114415	0.0126997	0.0110269	-0.0013527	0.00192964	0.0067872
0.968	0.013593	0.00808432	0.00776271	0.0125542	-0.00358757	0.0015674	0.0118032	0.0116269	0.0104843	-0.00165699	0.00285091	0.00720285
0.969	0.0135441	0.00858545	0.00836	0.0143822	-0.00349929	0.00228029	0.012196	0.0105574	0.0102535	-0.00161745	0.00359798	0.00724628
0.97	0.0135217	0.00937527	0.00859654	0.0156561	-0.00301175	0.00267092	0.012484	0.00964004	0.0104656	-0.00130729	0.00435266	0.006929
0.971	0.0134579	0.010331	0.00845066	0.0162667	-0.00214139	0.00279406	0.0126538	0.00911384	0.0110596	-0.000790685	0.00505653	0.00637217
0.972	0.0133678	0.0113574	0.00791038	0.0162829	-0.00117182	0.00295577	0.0127695	0.00912805	0.0117419	-0.000222809	0.00548445	0.00571499
0.973	0.0132392	0.0124114	0.00698332	0.0160353	-0.000275037	0.00338007	0.0128108	0.00967052	0.0123286	0.000249389	0.0054959	0.00507139
0.974	0.0130554	0.0134231	0.00580625	0.0159846	0.000627398	0.00412618	0.012676	0.0105956	0.0128504	0.000712126	0.00513474	0.00447814
0.975	0.0128154	0.0142566	0.00465323	0.016443	0.00159614	0.00519075	0.0123566	0.0116789	0.0133645	0.00127567	0.00454568	0.00383993
0.976	0.0125062	0.0147739	0.00376003	0.017501	0.0025693	0.00652287	0.012028	0.0127767	0.0138685	0.0017025	0.00390918	0.00306045
0.977	0.0121224	0.0149509	0.0032304	0.0190941	0.00339478	0.00793988	0.0117405	0.0138592	0.0142471	0.00162001	0.00339409	0.00209235
0.978	0.0117281	0.0149198	0.00309389	0.020957	0.00388168	0.00919323	0.0112527	0.0148724	0.014344	0.00101867	0.0030489	0.000854906
0.979	0.0114271	0.0148241	0.00335702	0.0227878	0.00397013	0.0100993	0.0104411	0.0156518	0.0141892	0.000261579	0.00284022	-0.000592894
0.98	0.0112506	0.0146918	0.00396698	0.0244984	0.00378335	0.010627	0.00962008	0.016042	0.0139912	-0.000415821	0.00283641	-0.00185499
0.981	0.0111803	0.0145202	0.00482369	0.0260482	0.00350952	0.0108648	0.00922078	0.016085	0.0139304	-0.00115282	0.00317183	-0.00253182
0.982	0.0112786	0.0143391	0.00586139	0.0272756	0.00332965	0.0108159	0.00928478	0.0159265	0.0140673	-0.00204273	0.00383496	-0.00267334
0.983	0.011661	0.014159	0.00703358	0.0281245	0.00336476	0.0104294	0.00950444	0.0156158	0.0143637	-0.00276903	0.00466778	-0.00262609
0.984	0.0122974	0.0139559	0.00822587	0.0287403	0.00356086	0.00980667	0.00963459	0.0150812	0.0148004	-0.0029433	0.00545176	-0.00261576
0.985	0.0129934	0.0137216	0.00922893	0.0292472	0.00380389	0.00911428	0.00967568	0.0142866	0.0154452	-0.00262123	0.00602579	-0.00269494
0.986	0.013592	0.0135276	0.00985606	0.0296476	0.00411719	0.00845894	0.00974607	0.0133881	0.0162837	-0.00222437	0.0064225	-0.002922
0.987	0.0140238	0.0134922	0.0100478	0.0298667	0.0045666	0.00790764	0.00985516	0.0126291	0.0171005	-0.00199628	0.0066666	-0.00341357
0.988	0.0142198	0.0136578	0.00983035	0.0297695	0.00514732	0.00741723	0.0098636	0.0121417	0.0176723	-0.00173895	0.00659045	-0.00424005
0.989	0.0141189	0.0139793	0.00931488	0.0292997	0.005737	0.00689039	0.00959984	0.0119227	0.0179411	-0.00116495	0.0060427	-0.00540042
0.99	0.0137311	0.0143671	0.00873444	0.0285585	0.00608215	0.00638846	0.00886773	0.0119209	0.0179139	-0.000354552	0.00508558	-0.00692192
0.991	0.013113	0.0147113	0.00832758	0.0276645	0.00595098	0.00613695	0.00751747	0.0121021	0.0175873	0.00034042	0.00393662	-0.00883848
0.992	0.0123178	0.0149588	0.00819247	0.0267629	0.00526898	0.0063461	0.00557661	0.0124191	0.0169741	0.000746985	0.00280838	-0.0110594
0.993	0.0114273	0.0151477	0.00827403	0.026012	0.00410132	0.00699804	0.00316226	0.0128212	0.0161375	0.000965008	0.00185578	-0.0133257
0.994	0.0105075	0.0153904	0.00840106	0.0253747	0.00265643	0.00779434	0.000500828	0.0133122	0.0152125	0.00109383	0.00117813	-0.01526
0.995	0.00954862	0.0157781	0.00839218	0.0246612	0.00128964	0.00848656	-0.00196697	0.0138562	0.0142636	0.00106981	0.000733056	-0.0165323
0.996	0.00855807	0.0162311	0.00822111	0.0237381	0.000266528	0.00921745	-0.00392013	0.0142849	0.0131289	0.00073995	0.000403159	-0.0171078
0.997	0.0075856	0.0165954	0.00800307	0.0225323	-0.000416025	0.0102992	-0.00542981	0.0144627	0.0116627	4.58598e-05	0.000136548	-0.0171928
0.998	0.00669623	0.0168185	0.00783289	0.0209382	-0.00082669	0.0118183	-0.00664355	0.014495	0.0101173	-0.000897104	-0.000148425	-0.0168945
0.999	0.00602995	0.0169009	0.00776961	0.0188413	-0.000944208	0.0136008	-0.0075039	0.0145563	0.00893933	-0.00187985	-0.00055258	-0.0162031
1	0.00573525	0.0168675	0.00789817	0.016234	-0.0007756	0.0152671	-0.0078714	0.0146049	0.008322	-0.00267067	-0.00102659	-0.0152932
1.001	0.00582573	0.0167921	0.00829399	0.0132602	-0.000433537	0.0163928	-0.00773343	0.0144715	0.00819243	-0.0030209	-0.00144257	-0.0145113
1.002	0.0062066	0.0167031	0.00897414	0.0100964	-7.20476e-05	0.0168136	-0.00721738	0.0141269	0.00837892	-0.0026612	-0.00178973	-0.0141312
1.003	0.00679423	0.0165195	0.0099084	0.0068614	0.000223298	0.0165975	-0.00639859	0.0137471	0.00876166	-0.00149321	-0.00215218	-0.0142718
1.004	0.00756539	0.016138	0.0109915	0.00366262	0.00051611	0.0157903	-0.00523292	0.0135464	0.00928588	0.000107672	-0.0025125	-0.0148452
1.005	0.00852419	0.0155316	0.0119746	0.00060793	0.000907632	0.0143229	-0.00370423	0.013586	0.0097103	0.00152134	-0.00278322	-0.0156742
1.006	0.00966218	0.0147636	0.0126016	-0.00219384	0.0013592	0.0121705	-0.00197691	0.0136844	0.00973662	0.00250629	-0.00302696	-0.0167065
1.007	0.0109022	0.0139627	0.0128028	-0.00449887	0.00174306	0.00961385	-0.000352942	0.0135869	0.00949546	0.00331237	-0.0033415	-0.0178522
1.008	0.0120352	0.0132977	0.0126234	-0.00590661	0.00195454	0.00716694	0.000986967	0.013246	0.0093269	0.00432161	-0.00359957	-0.0187407
1.009	0.0128457	0.0129296	0.0121356	-0.00622212	0.00192676	0.00519697	0.00208312	0.0127766	0.00919186	0.00584157	-0.00360217	-0.0189491
1.01	0.0133065	0.0128977	0.011486	-0.00567359	0.00167916	0.00376254	0.00313793	0.0122201	0.00881707	0.00817548	-0.00342915	-0.0183835
1.011	0.0135505	0.0130971	0.0108487	-0.00455221	0.00134608	0.00279682	0.00440267	0.0114608	0.00813509	0.0116864	-0.00340178	-0.0172331
1.012	0.0136755	0.0134326	0.0103625	-0.00296477	0.00107732	0.00223455	0.00585743	0.0103639	0.00723	0.0165194	-0.00366089	-0.01566
1.013	0.0136102	0.0138752	0.0101217	-0.00103818	0.00107198	0.00201442	0.00707042	0.00898761	0.00613114	0.0222215	-0.00404483	-0.0136922
1.014	0.0132772	0.0143592	0.0101086	0.000929351	0.00173661	0.0021071	0.00760592	0.00756916	0.00484666	0.027981	-0.0044603	-0.011381
1.015	0.0128233	0.0147624	0.0101649	0.00252126	0.0035584	0.00248222	0.0075473	0.00622163	0.00349476	0.0332765	-0.0050653	-0.00897145
1.016	0.0124937	0.0149958	0.0100815	0.00340038	0.00680882	0.00316913	0.00734896	0.00480903	0.00235229	0.0378885	-0.00596343	-0.00681828
1.017	0.0123985	0.0150255	0.00976053	0.00348149	0.0112979	0.00426213	0.0072798	0.00323039	0.00170143	0.0413641	-0.00697591	-0.00516247
1.018	0.0125265	0.0148088	0.0092889	0.00292093	0.0163729	0.00564638	0.00735263	0.0016534	0.00162639	0.0429701	-0.00783213	-0.00415898
1.019	0.0128312	0.0143241	0.00880329	0.00206751	0.0212869	0.00693467	0.00755345	0.000436252	0.00207762	0.0423133	-0.00836347	-0.00395481
1.02	0.0132053	0.0137146	0.00837478	0.00134333	0.0254356	0.00771572	0.00797102	-0.000169531	0.00306182	0.0397004	-0.00851539	-0.00450673
1.021	0.0134887	0.0132237	0.0080545	0.00103509	0.0283495	0.00782838	0.00875032	-0.000264633	0.00455804	0.0356484	-0.00829907	-0.00552931
1.022	0.0135872	0.012984	0.0078551	0.00126121	0.0297559	0.00750697	0.00986102	-0.000124328	0.00633328	0.0303696	-0.00776039	-0.00672448
1.023	0.0134991	0.0129638	0.00772365	0.00210711	0.0296099	0.00708982	0.0110615	0.00018439	0.00802603	0.0240541	-0.00705721	-0.00796387
1.024	0.013188	0.0130469	0.00767018	0.00360368	0.0280489	0.00660969	0.0120577	0.000791702	0.00940474	0.0173036	-0.00634892	-0.00921834
1.025	0.0126015	0.0131446	0.00776829	0.00560804	0.0253467	0.00591533	0.0126866	0.001731	0.0104932	0.0109116	-0.0055787	-0.0103526
1.026	0.0118143	0.0132129	0.00799752	0.00788495	0.021888	0.00504508	0.0131252	0.00285754	0.0114213	0.00540042	-0.00459111	-0.0110743
1.027	0.0110296	0.0132676	0.00830551	0.0102714	0.0181553	0.00423308	0.0137269	0.00392478	0.0122287	0.000850097	-0.00331137	-0.0110265
1.028	0.0104322	0.0134543	0.00878329	0.0126696	0.0146325	0.00365178	0.0145884	0.00471835	0.0128824	-0.00295703	-0.00175395	-0.0100431
1.029	0.0100281	0.0139282	0.00960775	0.0149667	0.0117299	0.00336795	0.0154884	0.00525343	0.013411	-0.00608963	7.28681e-06	-0.00836919
1.03	0.00974091	0.0146037	0.0108958	0.0170297	0.00976784	0.00351284	0.0161685	0.0057673	0.0138676	-0.00816685	0.00190165	-0.00640731
1.031	0.00959841	0.015186	0.0126837	0.0187311	0.00891657	0.00432771	0.0164535	0.00650638	0.0142241	-0.00882907	0.00385182	-0.00431571
1.032	0.00973582	0.0154986	0.0149485	0.0199384	0.00922905	0.00597944	0.0161675	0.00766137	0.0145226	-0.00828187	0.00569745	-0.00208946
1.033	0.0102691	0.0155765	0.0176091	0.0204757	0.0106875	0.00846478	0.0152674	0.00945397	0.0150188	-0.00687679	0.007295	5.2898e-05
1.034	0.0111314	0.0155125	0.0205257	0.0202091	0.0131828	0.0118336	0.0140369	0.0120297	0.0159511	-0.00452819	0.00861248	0.00165765
1.035	0.0121897	0.0154059	0.0235034	0.01923	0.0165515	0.016144	0.0129844	0.0153413	0.017292	-0.00104723	0.00962162	0.00244851
1.036	0.0134365	0.0153292	0.0263354	0.0178276	0.0205994	0.0210784	0.0125616	0.0193316	0.0189038	0.00327446	0.0103145	0.0025729
1.037	0.0148839	0.0153183	0.0288325	0.0162489	0.0250934	0.026066	0.0128527	0.0239931	0.0207538	0.00785405	0.01085	0.0023476
1.038	0.0165293	0.015421	0.0308146	0.0145862	0.029778	0.0306842	0.0136442	0.0291453	0.0228124	0.0122774	0.0114692	0.00187906
1.039	0.018421	0.0157038	0.0321614	0.0129236	0.03435	0.0347468	0.0148552	0.0343256	0.0249511	0.0162352	0.0122784	0.00116051
1.04	0.0205296	0.0163043	0.0328266	0.0116065	0.0384907	0.0382276	0.0165977	0.0389425	0.0270447	0.0193162	0.0132529	0.000401133
1.041	0.0226767	0.0173941	0.0328285	0.0113417	0.041963	0.0411733	0.0189375	0.0425505	0.0290211	0.0211747	0.0142572	1.22854e-05
1.042	0.0245903	0.0189954	0.0323254	0.0129125	0.0445989	0.0436789	0.0218488	0.0449206	0.0306976	0.0218185	0.015044	0.000363888
1.043	0.0260096	0.0209252	0.0315514	0.0167655	0.0462422	0.0458	0.0252545	0.0459431	0.031768	0.0214193	0.0155189	0.00159281
1.044	0.0269144	0.0229382	0.0306967	0.0228631	0.0468024	0.0473805	0.0289346	0.0457398	0.0321409	0.0200924	0.0158139	0.00364727
1.045	0.0275491	0.0249234	0.0299705	0.0308893	0.0463198	0.0481224	0.0324211	0.0447005	0.0319492	0.01824	0.0160462	0.00650327
1.046	0.0281539	0.026894	0.0295836	0.0404697	0.0448828	0.0478671	0.0350555	0.0431915	0.0312592	0.0165439	0.0162962	0.0101399
1.047	0.028858	0.0287874	0.0296407	0.0510696	0.0426783	0.0466373	0.0362978	0.0413473	0.0301376	0.0154002	0.0167089	0.014279
1.048	0.0297223	0.030452	0.030177	0.0618993	0.0401041	0.0444129	0.0361189	0.0392314	0.0289109	0.0148461	0.0174078	0.018391
1.049	0.0306971	0.0318177	0.0311269	0.0720833	0.0375444	0.0411621	0.0349394	0.0370592	0.0280797	0.0148532	0.0183853	0.021988
1.05	0.0316371	0.0328854	0.0322706	0.0808328	0.0351353	0.0370744	0.0331634	0.0350256	0.0278394	0.0152788	0.0194736	0.0247558
1.051	0.0324001	0.0336082	0.0333943	0.0875379	0.032863	0.0325763	0.0310096	0.0330963	0.0279209	0.0157963	0.020429	0.0265379
1.052	0.0329128	0.0339246	0.0343532	0.0918059	0.0307433	0.0281835	0.028625	0.0311733	0.027962	0.0160744	0.0211617	0.0273389
1.053	0.0332502	0.0338269	0.0349894	0.0934838	0.0288206	0.024236	0.0261041	0.029259	0.0278522	0.0159038	0.0217073	0.0272121
1.054	0.0335865	0.0334431	0.0351809	0.0927377	0.0271144	0.0208318	0.0235333	0.0274498	0.0276553	0.0151893	0.021931	0.0261552
1.055	0.033999	0.0329958	0.0349073	0.0900147	0.0256011	0.0181393	0.021084	0.0259021	0.0272627	0.0139038	0.0215484	0.024254
1.056	0.0344207	0.0326151	0.0342378	0.085816	0.0241702	0.0164215	0.0189913	0.024663	0.0264638	0.0120475	0.0204284	0.0218155
1.057	0.0347271	0.0323329	0.0332635	0.0806195	0.0226852	0.0157009	0.0173953	0.0235674	0.0254155	0.00970702	0.0186452	0.0192574
1.058	0.0348311	0.0321079	0.0320632	0.0749456	0.0210747	0.0157352	0.0162116	0.0224817	0.0245251	0.00717733	0.0163432	0.0169403
1.059	0.0346816	0.0318492	0.0307666	0.069208	0.0193438	0.0162818	0.0153338	0.0214254	0.0238352	0.00479549	0.0137815	0.0151216
1.06	0.034193	0.0315596	0.0295192	0.0635358	0.0175702	0.0171225	0.0149023	0.0203885	0.0230804	0.00265063	0.0112515	0.0140091
1.061	0.0332919	0.0313067	0.0283835	0.0578804	0.0157495	0.0179418	0.0150524	0.0192544	0.0221642	0.000734085	0.0088261	0.0136515
1.062	0.0319974	0.0310685	0.0272861	0.0522526	0.0137362	0.0184227	0.015464	0.0178748	0.0211707	-0.000797382	0.00647901	0.013767
1.063	0.0304209	0.0306927	0.0260641	0.0469324	0.0115181	0.0183758	0.0156045	0.0162063	0.020104	-0.00171801	0.00434357	0.0139805
1.064	0.0287187	0.0300075	0.0246687	0.0423761	0.00935223	0.0177724	0.0154011	0.0143885	0.0188388	-0.00194651	0.00270368	0.0142405
1.065	0.0270597	0.02899	0.0232181	0.0387404	0.00751464	0.0166825	0.0151578	0.01258	0.0172608	-0.00161255	0.001785	0.0147138
1.066	0.0255886	0.0277851	0.021857	0.0357847	0.0060619	0.0151274	0.0148553	0.0108136	0.0153326	-0.000887149	0.00149508	0.0152688
1.067	0.0243913	0.0265675	0.0206672	0.0332949	0.00494316	0.013191	0.0141328	0.00910877	0.0131634	0.000198348	0.00154423	0.0154791
1.068	0.02353	0.0254562	0.0196374	0.0312704	0.00416028	0.0111141	0.0128977	0.00759573	0.0110673	0.00170124	0.0018201	0.0151152
1.069	0.0230347	0.0245556	0.0187456	0.0297244	0.00370559	0.00897014	0.0114825	0.00646006	0.00937586	0.00357568	0.00233669	0.0142589
1.07	0.0228689	0.0239803	0.0179896	0.0285579	0.00355608	0.00663896	0.0102469	0.00577229	0.0081763	0.00557819	0.00302752	0.0130659
1.071	0.0229465	0.0237938	0.0173119	0.0276572	0.00369876	0.00419137	0.00922806	0.00544797	0.00741006	0.00746753	0.0038583	0.0116293
1.072	0.0231836	0.0239264	0.0166983	0.0269504	0.00405449	0.00187778	0.00825901	0.00542654	0.00715674	0.00907203	0.00488344	0.0100721
1.073	0.0235159	0.0241844	0.0162686	0.0263859	0.00457372	-0.000144075	0.00727789	0.00572406	0.00755787	0.0101539	0.00607084	0.00863026
1.074	0.0238553	0.0244122	0.0161271	0.0259487	0.00536587	-0.00181594	0.00635734	0.00630657	0.00862816	0.0105727	0.00730603	0.00749528
1.075	0.0241425	0.0245773	0.0161903	0.025642	0.00645613	-0.00311894	0.00558612	0.00707455	0.0103269	0.0103854	0.00855577	0.00666533
1.076	0.0243981	0.0246673	0.0163295	0.0254832	0.00754879	-0.00405513	0.00501291	0.00793591	0.0126375	0.00957519	0.00978253	0.00598836
1.077	0.0246866	0.0246688	0.0166176	0.0255499	0.00830945	-0.00449829	0.00462805	0.0088682	0.0154595	0.0080624	0.0107748	0.00533054
1.078	0.0250904	0.0246566	0.0171739	0.0259662	0.00874975	-0.00420853	0.00436563	0.00989842	0.0184203	0.00601936	0.0112663	0.00476995
1.079	0.0256875	0.024754	0.0179241	0.0268888	0.00914519	-0.00305295	0.00409154	0.0110039	0.0209354	0.00377475	0.0112341	0.00460278
1.08	0.0265754	0.0250021	0.0186928	0.028474	0.0097315	-0.00107111	0.00362791	0.0120961	0.0226217	0.00160482	0.0109664	0.00506299
1.081	0.0278718	0.0253229	0.0193592	0.0307011	0.0106207	0.00159184	0.00298284	0.0131081	0.0236174	-0.000173982	0.0107355	0.00608017
1.082	0.0296391	0.0256059	0.0198829	0.0333285	0.0118883	0.00474943	0.00245483	0.0140951	0.0243651	-0.00122015	0.0106425	0.00744433
1.083	0.0318173	0.0258352	0.0202608	0.0360907	0.0136236	0.00819579	0.00233577	0.0151629	0.0250465	-0.0013157	0.0108984	0.00898749
1.084	0.034283	0.0261336	0.020502	0.0387753	0.0158038	0.0117579	0.00275076	0.0163173	0.0254778	-0.000459513	0.0117617	0.0104976
1.085	0.0369746	0.0265943	0.0207018	0.0411695	0.0181809	0.0153379	0.0037992	0.0175674	0.0256443	0.00113073	0.0130835	0.0117501
1.086	0.0398218	0.0271126	0.0210559	0.0430587	0.0204303	0.0187797	0.00553138	0.0190828	0.0258247	0.003148	0.0143931	0.0126532
1.087	0.0426152	0.0275466	0.0216503	0.0442424	0.0223668	0.0218174	0.00776048	0.0210343	0.0260835	0.00528029	0.0153818	0.0132546
1.088	0.0450419	0.0278515	0.0223592	0.0446407	0.0239812	0.0242676	0.0101724	0.0233237	0.026221	0.0072745	0.0160053	0.0136542
1.089	0.0468474	0.0280102	0.0230248	0.0444114	0.0253228	0.0261955	0.0125898	0.0255714	0.0261991	0.0089905	0.0163265	0.0139268
1.09	0.0479566	0.0280518	0.0235459	0.0437725	0.02639	0.0278312	0.0148575	0.0273811	0.0262375	0.0102407	0.0164418	0.014053
1.091	0.0484198	0.0280287	0.0238246	0.0428214	0.0271833	0.0293171	0.0167242	0.0287289	0.0264923	0.0107817	0.0164349	0.0139542
1.092	0.0483402	0.027919	0.0237943	0.041663	0.0277658	0.0306152	0.0180743	0.0299433	0.0266899	0.0106781	0.0163373	0.0135216
1.093	0.0477737	0.0276218	0.0234877	0.0404892	0.0281416	0.0316153	0.018999	0.0310854	0.0264148	0.0103819	0.0160365	0.0126489
1.094	0.0466555	0.027016	0.0230258	0.0394646	0.0282435	0.0322537	0.0195938	0.0317428	0.0258336	0.0103402	0.0153296	0.0115696
1.095	0.0449367	0.0260891	0.0225673	0.0386029	0.0281145	0.0325491	0.0197372	0.0316686	0.0255142	0.0107277	0.0143349	0.0108522
1.096	0.0426754	0.0249398	0.0222289	0.0378724	0.0279779	0.0324767	0.0189569	0.0311086	0.0255869	0.0115709	0.0135982	0.0108113
1.097	0.039932	0.0235553	0.0219389	0.0373922	0.028119	0.0318088	0.0165902	0.0303534	0.0257231	0.0129946	0.013595	0.0113837
1.098	0.0367158	0.0218156	0.0213677	0.0371883	0.0287228	0.0301658	0.0121029	0.0293687	0.0258249	0.0152162	0.0144134	0.0124436
1.099	0.0329965	0.0196896	0.0200291	0.0367435	0.0296785	0.02719	0.00517597	0.0278247	0.0261342	0.0182847	0.0160737	0.0137932
1.1	0.0285799	0.0171179	0.0174077	0.034991	0.0303517	0.0225597	-0.00442831	0.0252655	0.0266743	0.0220518	0.0189444	0.0151238
1.101	0.0230936	0.0136683	0.0129496	0.0308785	0.0296888	0.015917	-0.0168695	0.0212314	0.0270522	0.0263421	0.0235602	0.0163281
1.102	0.0161569	0.0084488	0.00596522	0.0238868	0.0265605	0.00693197	-0.0321118	0.0152641	0.0268725	0.0309034	0.0301923	0.0175962
1.103	0.0074214	0.000387981	-0.00443992	0.0137286	0.0199806	-0.00470782	-0.0500808	0.0070278	0.0261113	0.0353741	0.0387733	0.0190469
1.104	-0.00339977	-0.011548	-0.019328	-0.000179632	0.00922991	-0.0194565	-0.0709127	-0.00346587	0.024981	0.0394299	0.0490495	0.0205965
1.105	-0.0165068	-0.0284063	-0.0397585	-0.0185461	-0.00630024	-0.0379246	-0.0949558	-0.0160324	0.0234566	0.0428639	0.0608843	0.0222397
1.106	-0.0321143	-0.051277	-0.0666211	-0.0418912	-0.0273177	-0.0608033	-0.122627	-0.0307559	0.0210961	0.0454925	0.0743298	0.0241261
1.107	-0.0504976	-0.0811166	-0.100546	-0.07062	-0.0544415	-0.0887236	-0.154199	-0.0478873	0.0174887	0.0470627	0.0891655	0.026222
1.108	-0.0718892	-0.118501	-0.141866	-0.105173	-0.087956	-0.122035	-0.189722	-0.0674401	0.0125602	0.0473429	0.104683	0.0280853
1.109	-0.0962865	-0.163559	-0.190605	-0.146034	-0.12781	-0.160841	-0.229042	-0.0893506	0.00622028	0.0460858	0.1201	0.0291885
1.11	-0.123478	-0.216063	-0.24646	-0.193515	-0.173741	-0.205145	-0.271726	-0.113852	-0.00189183	0.0428607	0.134953	0.0292797
1.111	-0.153322	-0.275494	-0.308843	-0.247581	-0.22538	-0.254772	-0.317234	-0.141285	-0.0121761	0.0372431	0.148942	0.0282301
1.112	-0.185825	-0.341168	-0.376989	-0.30797	-0.282254	-0.309263	-0.36523	-0.171681	-0.0247941	0.0290612	0.161526	0.0256729
1.113	-0.220972	-0.412433	-0.4501	-0.374396	-0.343723	-0.367939	-0.415598	-0.204847	-0.0396751	0.0182308	0.171877	0.0209591
1.114	-0.258625	-0.48875	-0.527447	-0.446519	-0.409056	-0.430146	-0.468219	-0.240638	-0.0567628	0.0046066	0.179243	0.013501
1.115	-0.298542	-0.569639	-0.608343	-0.523815	-0.477768	-0.495438	-0.522747	-0.27889	-0.0761754	-0.0118906	0.183252	0.00298225
1.116	-0.340475	-0.654578	-0.692126	-0.605641	-0.549718	-0.563487	-0.578664	-0.319234	-0.0980541	-0.031183	0.183653	-0.0107735
1.117	-0.384235	-0.742884	-0.778313	-0.691356	-0.624727	-0.633941	-0.635526	-0.361155	-0.122317	-0.0531249	0.179997	-0.027873
1.118	-0.429706	-0.83379	-0.866701	-0.780374	-0.702412	-0.706421	-0.693109	-0.404282	-0.148718	-0.0776925	0.171854	-0.0482826
1.119	-0.476841	-0.926679	-0.957115	-0.872101	-0.782391	-0.780575	-0.751358	-0.44846	-0.177093	-0.105009	0.159083	-0.0717554
1.12	-0.525567	-1.02118	-1.04922	-0.965837	-0.864318	-0.85606	-0.810182	-0.493499	-0.207381	-0.135111	0.141745	-0.0978455
1.121	-0.575734	-1.11699	-1.14273	-1.06087	-0.947803	-0.932469	-0.86939	-0.539148	-0.239497	-0.167834	0.120084	-0.126074
1.122	-0.627215	-1.21377	-1.23749	-1.15659	-1.03244	-1.00942	-0.928742	-0.585237	-0.273416	-0.203036	0.0945075	-0.156097
1.123	-0.679899	-1.31119	-1.33341	-1.25243	-1.11788	-1.08665	-0.987998	-0.63171	-0.309189	-0.240703	0.0653205	-0.187719
1.124	-0.733542	-1.40901	-1.43028	-1.34804	-1.20396	-1.16383	-1.04702	-0.678554	-0.346826	-0.280485	0.0326521	-0.220837
1.125	-0.78785	-1.507	-1.5278	-1.4433	-1.29068	-1.24052	-1.10577	-0.725672	-0.386226	-0.321448	-0.00327292	-0.255283
1.126	-0.842648	-1.605	-1.62568	-1.53808	-1.37803	-1.31639	-1.1641	-0.772907	-0.427237	-0.362917	-0.0420822	-0.290684
1.127	-0.897836	-1.70282	-1.72363	-1.63219	-1.46583	-1.39126	-1.2218	-0.820221	-0.469698	-0.405033	-0.0834408	-0.326664
1.128	-0.953236	-1.80018	-1.82126	-1.72553	-1.55367	-1.46496	-1.2786	-0.867566	-0.513309	-0.448127	-0.127127	-0.362997
1.129	-1.00854	-1.89677	-1.91813	-1.81815	-1.64096	-1.53723	-1.33428	-0.914682	-0.557633	-0.492257	-0.172897	-0.399495
1.13	-1.0634	-1.99231	-2.01385	-1.90992	-1.72704	-1.60775	-1.38872	-0.961299	-0.602344	-0.537436	-0.220245	-0.43607
1.131	-1.11758	-2.08659	-2.10816	-2.00058	-1.81133	-1.67621	-1.44178	-1.00733	-0.647135	-0.583703	-0.268511	-0.472764
1.132	-1.171	-2.17941	-2.20073	-2.08984	-1.89344	-1.74233	-1.49323	-1.05275	-0.691523	-0.630813	-0.31725	-0.509571
1.133	-1.22375	-2.27053	-2.29114	-2.17719	-1.97306	-1.80597	-1.5427	-1.09738	-0.735097	-0.678174	-0.366272	-0.546385
1.134	-1.27603	-2.35971	-2.379	-2.26206	-2.04978	-1.86698	-1.58998	-1.14097	-0.777711	-0.725202	-0.415382	-0.58309
1.135	-1.32796	-2.4468	-2.46394	-2.34405	-2.12334	-1.92514	-1.63496	-1.18341	-0.819302	-0.771509	-0.464264	-0.619522
1.136	-1.37952	-2.53164	-2.54564	-2.42294	-2.19351	-1.98029	-1.67753	-1.2245	-0.859812	-0.816715	-0.512601	-0.655355
1.137	-1.4306	-2.61401	-2.62385	-2.49857	-2.26002	-2.03231	-1.71757	-1.26362	-0.899215	-0.860398	-0.560194	-0.690233
1.138	-1.48115	-2.6936	-2.69831	-2.57085	-2.32264	-2.081	-1.75496	-1.30006	-0.937458	-0.902321	-0.60691	-0.723964
1.139	-1.53097	-2.77012	-2.76883	-2.63963	-2.3813	-2.12627	-1.78963	-1.33371	-0.974423	-0.9424	-0.652566	-0.756574
1.14	-1.57982	-2.84343	-2.8353	-2.70469	-2.43595	-2.16808	-1.82171	-1.36491	-1.00992	-0.980627	-0.696932	-0.788233
1.141	-1.62751	-2.91348	-2.89773	-2.76582	-2.48661	-2.20638	-1.85137	-1.39378	-1.04365	-1.01718	-0.739802	-0.819052
1.142	-1.67401	-2.98013	-2.95599	-2.82286	-2.53328	-2.24112	-1.87867	-1.42032	-1.07544	-1.05225	-0.780946	-0.848865
1.143	-1.71934	-3.04324	-3.00995	-2.87555	-2.57604	-2.27241	-1.9036	-1.44462	-1.10559	-1.08566	-0.81996	-0.877289
1.144	-1.76342	-3.1027	-3.05957	-2.9237	-2.61504	-2.30056	-1.92608	-1.46692	-1.1346	-1.11691	-0.856447	-0.903931
1.145	-1.80604	-3.15845	-3.1049	-2.96723	-2.65023	-2.32583	-1.94608	-1.48743	-1.16258	-1.14567	-0.890308	-0.92849
1.146	-1.84703	-3.21041	-3.14599	-3.00616	-2.68149	-2.34826	-1.96365	-1.50626	-1.18908	-1.1719	-0.921608	-0.950784
1.147	-1.88634	-3.25851	-3.18296	-3.04056	-2.70868	-2.36786	-1.97885	-1.52334	-1.21371	-1.19573	-0.950448	-0.970742
1.148	-1.92392	-3.30274	-3.21601	-3.07059	-2.73169	-2.38472	-1.99181	-1.53863	-1.2364	-1.21725	-0.977111	-0.988517
1.149	-1.95961	-3.34316	-3.24526	-3.09664	-2.75055	-2.39907	-2.00276	-1.55225	-1.25724	-1.23663	-1.00202	-1.00453
1.15	-1.99323	-3.37984	-3.27082	-3.11926	-2.76544	-2.41132	-2.01186	-1.56453	-1.27623	-1.25413	-1.02546	-1.01912
1.151	-2.02473	-3.41288	-3.29283	-3.13905	-2.77666	-2.42185	-2.01919	-1.57578	-1.29345	-1.27009	-1.04749	-1.03248
1.152	-2.05417	-3.44246	-3.31152	-3.15642	-2.78467	-2.43079	-2.02487	-1.58614	-1.30892	-1.28479	-1.06823	-1.04492
1.153	-2.08168	-3.46891	-3.32712	-3.1716	-2.78999	-2.43806	-2.02921	-1.59573	-1.32267	-1.29841	-1.08805	-1.05688
1.154	-2.10742	-3.49257	-3.33989	-3.18467	-2.79312	-2.44359	-2.03247	-1.60475	-1.33489	-1.31111	-1.10718	-1.06852
1.155	-2.1317	-3.51361	-3.35027	-3.19565	-2.7946	-2.44745	-2.03486	-1.61321	-1.34596	-1.32292	-1.12541	-1.07964
1.156	-2.15493	-3.53206	-3.35862	-3.20451	-2.79511	-2.44981	-2.03657	-1.62086	-1.35606	-1.33376	-1.14236	-1.09001
1.157	-2.17739	-3.54788	-3.36509	-3.21114	-2.79523	-2.45082	-2.03769	-1.62753	-1.36515	-1.34364	-1.15807	-1.09965
1.158	-2.19925	-3.56101	-3.36972	-3.2154	-2.79549	-2.45052	-2.03828	-1.6333	-1.37339	-1.35262	-1.17271	-1.10883
1.159	-2.22056	-3.5715	-3.37263	-3.21722	-2.7964	-2.44905	-2.03843	-1.63824	-1.38119	-1.36075	-1.18616	-1.11766
1.16	-2.2412	-3.5795	-3.37385	-3.21662	-2.79827	-2.44669	-2.03826	-1.64237	-1.38887	-1.36804	-1.19814	-1.12592
1.161	-2.26105	-3.58504	-3.37334	-3.2138	-2.80096	-2.44375	-2.03789	-1.64576	-1.3964	-1.3744	-1.20865	-1.13333
1.162	-2.27993	-3.58808	-3.37116	-3.20918	-2.80409	-2.44044	-2.03739	-1.64843	-1.40342	-1.37967	-1.21792	-1.13982
1.163	-2.29755	-3.58875	-3.36741	-3.20308	-2.80726	-2.43704	-2.03671	-1.65033	-1.40971	-1.38376	-1.2261	-1.14545
1.164	-2.31371	-3.58734	-3.36218	-3.1956	-2.81011	-2.43399	-2.03571	-1.65152	-1.4154	-1.38665	-1.23312	-1.15015
1.165	-2.3282	-3.58426	-3.35562	-3.18696	-2.81234	-2.43159	-2.03415	-1.65221	-1.42064	-1.38852	-1.23911	-1.15373
1.166	-2.34087	-3.57975	-3.34802	-3.17772	-2.81361	-2.42984	-2.03184	-1.6525	-1.42518	-1.38982	-1.24443	-1.15621
1.167	-2.35165	-3.57367	-3.33968	-3.16858	-2.81363	-2.42843	-2.02876	-1.65236	-1.42879	-1.39094	-1.24929	-1.15786
1.168	-2.36073	-3.56587	-3.33086	-3.16005	-2.81229	-2.427	-2.0252	-1.65164	-1.43163	-1.39201	-1.2536	-1.15911
1.169	-2.36843	-3.55658	-3.32169	-3.15217	-2.80975	-2.42528	-2.02142	-1.65016	-1.43393	-1.39297	-1.25723	-1.16022
1.17	-2.37504	-3.5462	-3.3122	-3.14464	-2.80607	-2.42303	-2.01747	-1.64777	-1.43575	-1.3938	-1.26021	-1.1611
1.171	-2.38067	-3.53509	-3.30239	-3.13693	-2.80121	-2.42005	-2.01333	-1.64451	-1.43705	-1.3946	-1.26275	-1.16169
1.172	-2.38545	-3.5235	-3.29221	-3.12859	-2.79524	-2.41628	-2.00908	-1.64056	-1.4377	-1.39532	-1.26502	-1.16201
1.173	-2.38954	-3.5116	-3.28159	-3.1194	-2.78845	-2.41183	-2.00486	-1.63631	-1.43767	-1.3958	-1.26698	-1.16206
1.174	-2.39312	-3.49956	-3.27049	-3.10939	-2.78121	-2.40678	-2.0007	-1.63221	-1.4371	-1.39596	-1.26864	-1.16177
1.175	-2.39626	-3.48745	-3.259	-3.09862	-2.7738	-2.40116	-1.99642	-1.62846	-1.43609	-1.39577	-1.27007	-1.161
1.176	-2.3989	-3.47519	-3.24726	-3.08719	-2.76623	-2.39505	-1.99186	-1.62482	-1.43465	-1.39521	-1.27108	-1.15966
1.177	-2.40099	-3.46266	-3.23525	-3.07524	-2.75849	-2.38861	-1.98708	-1.62102	-1.43275	-1.39424	-1.27136	-1.15785
1.178	-2.40258	-3.44977	-3.22299	-3.06305	-2.75061	-2.38207	-1.9822	-1.61712	-1.4304	-1.39291	-1.27087	-1.15589
1.179	-2.40355	-3.43643	-3.21062	-3.05093	-2.74267	-2.37555	-1.97714	-1.61346	-1.42773	-1.39127	-1.26987	-1.15403
1.18	-2.40364	-3.42257	-3.1983	-3.03906	-2.73478	-2.3689	-1.97169	-1.61016	-1.42491	-1.38941	-1.26847	-1.15219
1.181	-2.40272	-3.40814	-3.18604	-3.02754	-2.72693	-2.36192	-1.96591	-1.607	-1.42213	-1.38734	-1.26664	-1.15019
1.182	-2.40091	-3.39312	-3.17369	-3.01646	-2.71891	-2.35458	-1.96013	-1.60372	-1.41959	-1.38491	-1.26444	-1.14799
1.183	-2.39846	-3.3775	-3.16113	-3.00577	-2.71058	-2.347	-1.95453	-1.60036	-1.41741	-1.38185	-1.26218	-1.14575
1.184	-2.3955	-3.36129	-3.14831	-2.99546	-2.702	-2.33926	-1.94897	-1.59712	-1.41544	-1.37819	-1.26014	-1.14359
1.185	-2.39211	-3.3445	-3.13518	-2.9855	-2.69325	-2.33125	-1.9433	-1.59388	-1.41329	-1.37421	-1.25834	-1.14143
1.186	-2.38829	-3.32719	-3.12169	-2.97564	-2.68428	-2.32286	-1.93741	-1.59021	-1.41075	-1.3701	-1.25663	-1.13906
1.187	-2.3841	-3.30946	-3.10792	-2.96552	-2.67499	-2.31408	-1.93127	-1.58577	-1.40788	-1.36577	-1.25486	-1.13645
1.188	-2.37954	-3.29141	-3.09389	-2.95486	-2.6653	-2.30503	-1.92476	-1.58059	-1.40467	-1.36112	-1.25298	-1.13376
1.189	-2.37463	-3.27303	-3.07952	-2.94356	-2.65514	-2.2958	-1.91782	-1.57483	-1.40099	-1.35621	-1.25093	-1.13102
1.19	-2.36944	-3.25434	-3.06465	-2.93165	-2.64459	-2.28643	-1.9106	-1.56872	-1.3968	-1.35125	-1.24862	-1.12811
1.191	-2.36407	-3.23537	-3.04923	-2.91921	-2.63386	-2.27708	-1.90329	-1.56246	-1.39227	-1.34645	-1.24598	-1.12492
1.192	-2.3586	-3.21616	-3.03338	-2.90616	-2.62312	-2.26783	-1.89604	-1.55608	-1.38765	-1.34187	-1.24296	-1.12151
1.193	-2.35315	-3.19679	-3.01729	-2.89253	-2.61244	-2.25866	-1.88881	-1.54964	-1.38306	-1.33735	-1.23938	-1.11785
1.194	-2.34787	-3.17745	-3.00111	-2.87849	-2.6018	-2.24958	-1.88148	-1.54344	-1.3785	-1.33275	-1.23514	-1.1136
1.195	-2.34271	-3.15831	-2.98498	-2.86419	-2.59115	-2.24054	-1.87403	-1.53755	-1.37403	-1.3281	-1.23035	-1.1085
1.196	-2.33752	-3.13939	-2.96885	-2.84971	-2.58045	-2.23148	-1.86661	-1.53169	-1.36984	-1.32347	-1.22528	-1.10271
1.197	-2.33221	-3.12073	-2.95256	-2.83518	-2.56948	-2.22246	-1.85939	-1.52565	-1.3659	-1.3188	-1.22005	-1.0967
1.198	-2.32673	-3.10222	-2.93602	-2.82078	-2.55814	-2.21361	-1.85242	-1.51956	-1.36194	-1.31395	-1.21469	-1.09085
1.199	-2.32105	-3.08362	-2.91927	-2.80668	-2.5467	-2.20493	-1.84561	-1.51376	-1.35772	-1.30888	-1.20926	-1.08516
1.2	-2.31505	-3.06483	-2.90241	-2.79293	-2.5355	-2.19637	-1.83884	-1.50834	-1.35304	-1.3036	-1.20402	-1.07943
1.201	-2.30856	-3.04593	-2.88554	-2.77947	-2.5246	-2.18789	-1.83204	-1.50318	-1.34781	-1.29815	-1.19915	-1.0738
1.202	-2.30155	-3.02707	-2.86871	-2.76613	-2.51392	-2.17944	-1.82517	-1.49804	-1.34212	-1.29258	-1.19455	-1.06861
1.203	-2.29409	-3.00843	-2.85201	-2.75272	-2.50341	-2.17097	-1.81818	-1.49286	-1.33624	-1.28694	-1.18994	-1.06385
1.204	-2.28627	-2.99006	-2.83556	-2.73919	-2.49286	-2.16255	-1.81097	-1.48749	-1.33042	-1.28119	-1.18514	-1.05915
1.205	-2.27813	-2.97182	-2.81943	-2.72562	-2.48211	-2.15418	-1.80348	-1.4817	-1.32478	-1.27533	-1.18021	-1.05445
1.206	-2.26981	-2.95355	-2.80357	-2.71207	-2.47116	-2.14576	-1.79585	-1.47542	-1.31934	-1.26941	-1.17523	-1.0501
1.207	-2.26154	-2.93516	-2.7879	-2.69835	-2.46015	-2.13719	-1.7883	-1.46895	-1.3142	-1.26365	-1.17019	-1.04627
1.208	-2.25357	-2.91661	-2.77235	-2.68431	-2.44923	-2.1284	-1.78083	-1.46256	-1.30939	-1.25818	-1.16507	-1.04276
1.209	-2.246	-2.89799	-2.75686	-2.67009	-2.43847	-2.11931	-1.77321	-1.45619	-1.30479	-1.25297	-1.15998	-1.03921
1.21	-2.23886	-2.87957	-2.74134	-2.65602	-2.42783	-2.1099	-1.76532	-1.44976	-1.30012	-1.24792	-1.15513	-1.03541
1.211	-2.23217	-2.86151	-2.72566	-2.64239	-2.41724	-2.10026	-1.75723	-1.44356	-1.2954	-1.243	-1.1506	-1.03123
1.212	-2.22587	-2.84383	-2.70968	-2.62927	-2.40662	-2.0905	-1.74897	-1.43785	-1.29096	-1.23836	-1.14626	-1.02656
1.213	-2.2198	-2.8265	-2.69339	-2.61654	-2.39587	-2.08078	-1.74066	-1.43244	-1.28705	-1.23419	-1.14187	-1.02129
1.214	-2.2139	-2.80951	-2.67682	-2.60406	-2.3848	-2.07121	-1.73241	-1.42693	-1.28351	-1.23026	-1.13732	-1.01547
1.215	-2.20814	-2.79282	-2.6601	-2.59181	-2.37332	-2.06182	-1.72418	-1.42107	-1.28003	-1.22602	-1.13268	-1.00939
1.216	-2.2025	-2.77626	-2.64339	-2.57982	-2.36149	-2.05263	-1.71587	-1.41484	-1.27641	-1.22105	-1.12802	-1.0033
1.217	-2.19699	-2.7596	-2.62693	-2.56801	-2.34944	-2.04356	-1.70758	-1.40826	-1.27249	-1.21537	-1.12321	-0.997385
1.218	-2.19161	-2.74267	-2.61094	-2.5564	-2.33737	-2.03453	-1.69958	-1.40139	-1.26805	-1.2093	-1.11824	-0.991831
1.219	-2.18622	-2.72552	-2.59553	-2.54491	-2.32548	-2.02555	-1.69202	-1.39431	-1.26296	-1.20313	-1.11339	-0.986745
1.22	-2.18067	-2.70842	-2.58068	-2.53318	-2.31392	-2.0167	-1.68497	-1.38716	-1.25719	-1.19707	-1.10886	-0.982071
1.221	-2.17491	-2.69168	-2.56628	-2.52078	-2.30271	-2.00805	-1.67837	-1.37999	-1.25076	-1.19131	-1.10454	-0.977688
1.222	-2.16893	-2.67538	-2.55218	-2.50751	-2.29187	-1.99961	-1.67196	-1.37289	-1.24373	-1.18595	-1.1003	-0.973496
1.223	-2.1628	-2.65946	-2.53819	-2.49347	-2.28142	-1.99129	-1.66559	-1.36592	-1.23629	-1.18081	-1.09623	-0.969403
1.224	-2.1565	-2.64379	-2.52421	-2.47895	-2.27138	-1.983	-1.65938	-1.35919	-1.22868	-1.17572	-1.09236	-0.965357
1.225	-2.15003	-2.62815	-2.51025	-2.46413	-2.26179	-1.97469	-1.65341	-1.35288	-1.22116	-1.17077	-1.08849	-0.961359
1.226	-2.1435	-2.61232	-2.49631	-2.44902	-2.25259	-1.96633	-1.64747	-1.34708	-1.21401	-1.16627	-1.08441	-0.957412
1.227	-2.13707	-2.59627	-2.48233	-2.43386	-2.24366	-1.95787	-1.64127	-1.34179	-1.20739	-1.16231	-1.08004	-0.953463
1.228	-2.13085	-2.58007	-2.46822	-2.41904	-2.23486	-1.94924	-1.63467	-1.33688	-1.20134	-1.1586	-1.07535	-0.949408
1.229	-2.12483	-2.56376	-2.45391	-2.40469	-2.22596	-1.94042	-1.62779	-1.33232	-1.19594	-1.15485	-1.0703	-0.945139
1.23	-2.11893	-2.54741	-2.43939	-2.39057	-2.21666	-1.9316	-1.62079	-1.32807	-1.19131	-1.15095	-1.06483	-0.940613
1.231	-2.11305	-2.53117	-2.42478	-2.37632	-2.20671	-1.92296	-1.61362	-1.32392	-1.18735	-1.14686	-1.059	-0.935921
1.232	-2.10705	-2.51502	-2.41016	-2.36173	-2.19607	-1.91431	-1.60605	-1.31962	-1.18376	-1.14252	-1.05294	-0.931168
1.233	-2.10086	-2.49887	-2.39547	-2.34674	-2.18486	-1.90528	-1.59807	-1.31489	-1.18028	-1.13807	-1.04671	-0.926322
1.234	-2.09445	-2.48276	-2.38058	-2.33143	-2.17317	-1.89569	-1.58988	-1.30957	-1.17671	-1.13355	-1.04039	-0.92123
1.235	-2.08787	-2.46685	-2.36559	-2.31576	-2.16103	-1.88576	-1.58177	-1.30359	-1.17279	-1.12873	-1.03417	-0.915788
1.236	-2.08119	-2.45123	-2.35066	-2.29975	-2.14851	-1.87586	-1.57389	-1.29695	-1.16829	-1.12337	-1.02809	-0.910046
1.237	-2.07452	-2.43588	-2.33588	-2.28377	-2.13572	-1.86623	-1.56618	-1.28982	-1.16318	-1.11751	-1.02209	-0.904198
1.238	-2.06794	-2.42074	-2.32118	-2.26844	-2.12286	-1.85693	-1.55838	-1.28249	-1.15762	-1.11135	-1.01632	-0.898573
1.239	-2.06145	-2.40577	-2.30639	-2.2541	-2.11022	-1.84796	-1.55034	-1.27505	-1.152	-1.10495	-1.011	-0.893456
1.24	-2.05496	-2.39099	-2.29144	-2.24066	-2.09809	-1.83935	-1.54225	-1.26761	-1.14668	-1.09839	-1.00603	-0.888865
1.241	-2.04832	-2.37636	-2.27644	-2.22776	-2.08662	-1.83116	-1.53436	-1.26038	-1.14173	-1.09193	-1.00118	-0.884639
1.242	-2.04135	-2.36183	-2.2616	-2.21517	-2.0757	-1.82339	-1.52664	-1.25344	-1.13695	-1.08583	-0.996432	-0.880695
1.243	-2.03401	-2.3474	-2.24723	-2.20301	-2.06515	-1.81595	-1.51903	-1.24666	-1.13204	-1.08021	-0.992011	-0.87705
1.244	-2.02637	-2.33303	-2.23359	-2.19146	-2.05491	-1.8087	-1.51162	-1.2401	-1.12689	-1.0751	-0.987885	-0.873645
1.245	-2.01847	-2.31873	-2.22066	-2.18048	-2.04504	-1.80151	-1.50453	-1.2341	-1.12159	-1.07048	-0.983702	-0.870293
1.246	-2.01044	-2.30463	-2.20822	-2.16984	-2.0355	-1.79436	-1.49784	-1.22878	-1.11633	-1.06626	-0.979261	-0.866757
1.247	-2.00239	-2.29097	-2.19605	-2.15937	-2.02596	-1.78721	-1.49154	-1.22379	-1.11142	-1.06228	-0.974718	-0.862916
1.248	-1.99454	-2.27786	-2.18406	-2.14904	-2.01611	-1.78003	-1.4856	-1.21869	-1.10702	-1.05843	-0.970265	-0.858999
1.249	-1.98709	-2.26507	-2.1722	-2.13897	-2.006	-1.77281	-1.47993	-1.21337	-1.10294	-1.05469	-0.965922	-0.855448
1.25	-1.98011	-2.25241	-2.16055	-2.12928	-1.99585	-1.76571	-1.4743	-1.20808	-1.09902	-1.051	-0.96171	-0.852407
1.251	-1.97355	-2.23992	-2.14918	-2.11993	-1.98575	-1.75882	-1.46857	-1.20302	-1.09533	-1.04726	-0.957721	-0.849627
1.252	-1.9673	-2.2277	-2.13801	-2.11081	-1.97559	-1.75209	-1.46284	-1.1982	-1.09193	-1.04347	-0.953953	-0.846928
1.253	-1.96123	-2.21573	-2.12685	-2.10181	-1.96506	-1.74539	-1.45715	-1.19351	-1.08853	-1.03965	-0.950372	-0.844324
1.254	-1.95535	-2.20394	-2.11552	-2.09271	-1.95367	-1.73847	-1.4513	-1.18879	-1.08468	-1.03581	-0.947159	-0.841766
1.255	-1.94963	-2.19229	-2.10397	-2.08332	-1.94102	-1.73122	-1.44507	-1.18386	-1.08028	-1.03186	-0.944576	-0.839161
1.256	-1.94393	-2.1806	-2.09216	-2.07351	-1.92708	-1.72358	-1.43842	-1.17849	-1.07543	-1.02781	-0.942589	-0.836503
1.257	-1.93807	-2.16866	-2.08009	-2.06302	-1.91221	-1.71554	-1.43147	-1.17262	-1.07023	-1.02376	-0.94088	-0.83379
1.258	-1.93204	-2.15637	-2.06782	-2.0516	-1.89722	-1.70711	-1.42435	-1.16646	-1.06461	-1.01964	-0.939116	-0.83088
1.259	-1.92591	-2.14373	-2.05547	-2.0392	-1.88304	-1.69841	-1.41707	-1.16032	-1.05865	-1.01507	-0.93713	-0.827578
1.26	-1.91982	-2.13082	-2.04308	-2.0258	-1.8703	-1.68961	-1.40971	-1.15452	-1.05265	-1.00961	-0.934974	-0.823816
1.261	-1.91389	-2.11777	-2.03064	-2.01149	-1.85913	-1.68096	-1.40248	-1.14906	-1.04696	-1.00301	-0.932636	-0.819565
1.262	-1.90809	-2.10466	-2.01817	-1.99671	-1.84933	-1.67267	-1.39559	-1.14366	-1.04164	-0.995443	-0.929794	-0.814791
1.263	-1.90229	-2.09152	-2.00567	-1.98201	-1.84061	-1.66481	-1.38902	-1.13819	-1.03654	-0.987463	-0.926086	-0.809678
1.264	-1.89643	-2.07843	-1.99314	-1.96794	-1.83279	-1.65729	-1.38253	-1.13289	-1.03161	-0.979818	-0.921447	-0.804695
1.265	-1.89051	-2.06552	-1.98069	-1.95508	-1.82563	-1.64998	-1.37592	-1.12798	-1.02691	-0.973041	-0.916084	-0.800216
1.266	-1.88458	-2.05288	-1.9683	-1.9437	-1.81878	-1.64286	-1.36938	-1.12342	-1.02244	-0.967396	-0.910285	-0.79618
1.267	-1.87868	-2.04064	-1.95588	-1.9335	-1.81202	-1.63597	-1.3633	-1.11908	-1.01814	-0.962832	-0.904325	-0.792261
1.268	-1.87274	-2.02896	-1.94338	-1.92402	-1.8054	-1.62939	-1.35779	-1.11505	-1.01402	-0.959016	-0.898508	-0.788333
1.269	-1.86667	-2.01787	-1.93086	-1.91495	-1.79895	-1.62311	-1.35241	-1.1115	-1.00997	-0.955667	-0.89315	-0.78461
1.27	-1.86038	-2.00715	-1.91839	-1.90608	-1.79261	-1.61696	-1.34671	-1.10823	-1.00573	-0.952718	-0.888487	-0.781333
1.271	-1.85376	-1.99654	-1.90603	-1.89714	-1.78618	-1.61072	-1.34083	-1.10475	-1.00123	-0.9501	-0.884615	-0.778565
1.272	-1.84683	-1.98595	-1.89397	-1.88782	-1.77954	-1.60415	-1.33513	-1.10086	-0.996794	-0.947619	-0.881477	-0.776191
1.273	-1.83969	-1.97528	-1.88242	-1.87772	-1.77263	-1.5971	-1.3297	-1.09673	-0.99268	-0.945106	-0.878923	-0.773976
1.274	-1.83238	-1.9644	-1.87156	-1.86674	-1.76536	-1.58944	-1.32422	-1.09264	-0.988701	-0.942597	-0.876739	-0.771762
1.275	-1.82498	-1.95326	-1.86134	-1.85517	-1.75765	-1.58114	-1.31838	-1.08865	-0.984626	-0.940285	-0.874659	-0.76944
1.276	-1.8176	-1.94188	-1.85144	-1.84323	-1.74948	-1.57224	-1.31227	-1.08467	-0.980657	-0.938216	-0.872441	-0.766802
1.277	-1.81031	-1.93041	-1.84145	-1.83086	-1.74081	-1.56294	-1.30625	-1.08067	-0.977224	-0.936114	-0.869932	-0.763686
1.278	-1.80314	-1.91901	-1.83117	-1.81803	-1.73171	-1.55361	-1.30042	-1.07667	-0.974458	-0.933622	-0.867083	-0.760079
1.279	-1.7963	-1.90777	-1.82061	-1.8049	-1.72243	-1.54447	-1.29468	-1.0726	-0.972095	-0.930624	-0.863846	-0.756069
1.28	-1.78989	-1.8967	-1.80985	-1.79171	-1.71314	-1.53558	-1.28906	-1.06841	-0.969797	-0.927314	-0.860183	-0.751877
1.281	-1.78379	-1.88586	-1.79893	-1.77858	-1.70378	-1.52699	-1.28376	-1.0641	-0.967353	-0.92397	-0.856209	-0.747748
1.282	-1.77789	-1.87525	-1.78785	-1.76529	-1.69414	-1.51881	-1.27867	-1.05958	-0.964645	-0.920589	-0.852089	-0.743716
1.283	-1.77207	-1.8648	-1.7767	-1.7517	-1.68406	-1.51114	-1.27338	-1.05473	-0.961646	-0.916897	-0.847886	-0.739617
1.284	-1.76602	-1.8543	-1.76568	-1.73813	-1.67362	-1.50386	-1.26757	-1.04962	-0.958343	-0.912764	-0.84368	-0.735353
1.285	-1.75944	-1.84352	-1.75491	-1.72511	-1.6631	-1.49667	-1.26127	-1.04453	-0.95467	-0.908336	-0.839562	-0.731031
1.286	-1.75229	-1.83236	-1.7442	-1.71284	-1.65281	-1.48939	-1.25485	-1.03955	-0.950549	-0.90377	-0.835482	-0.726878
1.287	-1.74481	-1.82082	-1.7334	-1.7012	-1.6429	-1.48219	-1.24864	-1.03451	-0.946003	-0.89906	-0.831274	-0.723044
1.288	-1.73736	-1.80916	-1.72268	-1.69004	-1.63342	-1.4754	-1.24269	-1.02917	-0.941287	-0.894163	-0.826772	-0.719422
1.289	-1.7302	-1.79779	-1.71233	-1.67932	-1.62446	-1.46908	-1.23685	-1.02353	-0.9367	-0.889196	-0.821964	-0.715815
1.29	-1.7235	-1.78694	-1.7024	-1.66912	-1.61614	-1.46298	-1.23112	-1.01762	-0.932226	-0.884422	-0.817096	-0.712229
1.291	-1.71735	-1.77665	-1.69271	-1.65926	-1.60839	-1.45676	-1.22552	-1.01143	-0.927663	-0.880033	-0.8125	-0.7088
1.292	-1.71179	-1.76682	-1.68305	-1.64942	-1.60105	-1.45021	-1.21997	-1.00508	-0.922985	-0.876044	-0.808341	-0.705588
1.293	-1.70678	-1.75737	-1.67339	-1.63957	-1.59403	-1.44335	-1.21447	-0.99896	-0.918369	-0.872465	-0.804541	-0.702489
1.294	-1.70217	-1.74825	-1.66378	-1.62992	-1.5873	-1.43632	-1.20918	-0.993398	-0.913926	-0.869403	-0.800979	-0.699268
1.295	-1.69774	-1.7394	-1.65418	-1.62058	-1.58063	-1.4292	-1.20431	-0.988383	-0.90961	-0.866819	-0.797565	-0.695806
1.296	-1.69335	-1.73062	-1.64457	-1.61144	-1.57361	-1.42209	-1.19986	-0.98365	-0.905392	-0.864446	-0.794166	-0.692243
1.297	-1.689	-1.7218	-1.63495	-1.60247	-1.56604	-1.41516	-1.19562	-0.979096	-0.901361	-0.862001	-0.79064	-0.688754
1.298	-1.68473	-1.71303	-1.62535	-1.59379	-1.55806	-1.40858	-1.19142	-0.974946	-0.897588	-0.859279	-0.786903	-0.685384
1.299	-1.68051	-1.7044	-1.6159	-1.58579	-1.54987	-1.40239	-1.18725	-0.971363	-0.894001	-0.856181	-0.783053	-0.682172
1.3	-1.67624	-1.69586	-1.60678	-1.57864	-1.54155	-1.39654	-1.18307	-0.968108	-0.890368	-0.852793	-0.779398	-0.67925
1.301	-1.67196	-1.68728	-1.59797	-1.57218	-1.53314	-1.39107	-1.1788	-0.964821	-0.886588	-0.849257	-0.776051	-0.676704
1.302	-1.66775	-1.6786	-1.58929	-1.56618	-1.52477	-1.38608	-1.17439	-0.961452	-0.882978	-0.845556	-0.772782	-0.674578
1.303	-1.66374	-1.66985	-1.58068	-1.56061	-1.51648	-1.38156	-1.16983	-0.958186	-0.879916	-0.841592	-0.76946	-0.672939
1.304	-1.65999	-1.66104	-1.57217	-1.55538	-1.50815	-1.3773	-1.16501	-0.95508	-0.877324	-0.837425	-0.766245	-0.671718
1.305	-1.65639	-1.65225	-1.56372	-1.55004	-1.49963	-1.37307	-1.15986	-0.951954	-0.874858	-0.833261	-0.763265	-0.670632
1.306	-1.65283	-1.64368	-1.55519	-1.54403	-1.49088	-1.36872	-1.15446	-0.948583	-0.872419	-0.829278	-0.760473	-0.669291
1.307	-1.64928	-1.6355	-1.54663	-1.53699	-1.48207	-1.36412	-1.14901	-0.944893	-0.870129	-0.825608	-0.757882	-0.667367
1.308	-1.64568	-1.62771	-1.53822	-1.52902	-1.47353	-1.35906	-1.14366	-0.940998	-0.867861	-0.822399	-0.755668	-0.664791
1.309	-1.64191	-1.62023	-1.52996	-1.52032	-1.46553	-1.35336	-1.1385	-0.937129	-0.865191	-0.819787	-0.753897	-0.66163
1.31	-1.63788	-1.61301	-1.52175	-1.51092	-1.45803	-1.34719	-1.13365	-0.933429	-0.861936	-0.817728	-0.752304	-0.657867
1.311	-1.6334	-1.60587	-1.51347	-1.50081	-1.45098	-1.34072	-1.12925	-0.929918	-0.858333	-0.815886	-0.750488	-0.65359
1.312	-1.6283	-1.59856	-1.50511	-1.4902	-1.44441	-1.33384	-1.12524	-0.926549	-0.854594	-0.813977	-0.748289	-0.649116
1.313	-1.62257	-1.59097	-1.4967	-1.47948	-1.43824	-1.32644	-1.12131	-0.923299	-0.850684	-0.812052	-0.745833	-0.644784
1.314	-1.61634	-1.58318	-1.48833	-1.4689	-1.43221	-1.31872	-1.11719	-0.92021	-0.846685	-0.810169	-0.743202	-0.64078
1.315	-1.60972	-1.57531	-1.48014	-1.45869	-1.42611	-1.31113	-1.11281	-0.917282	-0.843074	-0.80817	-0.740327	-0.637125
1.316	-1.60285	-1.56742	-1.47213	-1.44914	-1.41991	-1.30397	-1.10823	-0.91439	-0.840197	-0.805941	-0.737186	-0.633845
1.317	-1.59587	-1.5595	-1.46422	-1.44043	-1.4136	-1.29732	-1.10352	-0.91139	-0.837739	-0.803544	-0.733867	-0.631033
1.318	-1.58889	-1.55143	-1.45629	-1.43251	-1.40703	-1.29121	-1.09863	-0.908201	-0.835209	-0.801023	-0.730501	-0.628765
1.319	-1.58195	-1.54315	-1.44833	-1.42519	-1.40011	-1.28567	-1.09348	-0.904749	-0.832543	-0.798239	-0.727278	-0.627123
1.32	-1.5751	-1.53473	-1.44036	-1.41832	-1.3929	-1.28053	-1.0881	-0.901	-0.829894	-0.794964	-0.72438	-0.626065
1.321	-1.56845	-1.52629	-1.4324	-1.41199	-1.38556	-1.27548	-1.08265	-0.897031	-0.827177	-0.79122	-0.721907	-0.625285
1.322	-1.56211	-1.51782	-1.4244	-1.40635	-1.37805	-1.27031	-1.07729	-0.892892	-0.824147	-0.787307	-0.719973	-0.624424
1.323	-1.55621	-1.50932	-1.41636	-1.4011	-1.37033	-1.265	-1.07209	-0.888596	-0.820792	-0.783433	-0.718582	-0.623272
1.324	-1.55089	-1.50098	-1.40845	-1.39568	-1.36264	-1.25966	-1.06709	-0.884316	-0.817331	-0.77962	-0.717419	-0.621683
1.325	-1.54606	-1.493	-1.4009	-1.38967	-1.35536	-1.25428	-1.06236	-0.880213	-0.813802	-0.775932	-0.716067	-0.619517
1.326	-1.54152	-1.48532	-1.39379	-1.38312	-1.3487	-1.24874	-1.05783	-0.876218	-0.810002	-0.772615	-0.714326	-0.6168
1.327	-1.53712	-1.47782	-1.38698	-1.37623	-1.34266	-1.24296	-1.05328	-0.872297	-0.805952	-0.769912	-0.712304	-0.613708
1.328	-1.53288	-1.47039	-1.38031	-1.36921	-1.33721	-1.23711	-1.04851	-0.86853	-0.802014	-0.767674	-0.71022	-0.610383
1.329	-1.52884	-1.46303	-1.37374	-1.36219	-1.33213	-1.23143	-1.04359	-0.864892	-0.798523	-0.765371	-0.708048	-0.606902
1.33	-1.52485	-1.45574	-1.36726	-1.35528	-1.32707	-1.22607	-1.03875	-0.861347	-0.795567	-0.762665	-0.705559	-0.603408
1.331	-1.52067	-1.44854	-1.36084	-1.34868	-1.32168	-1.2211	-1.03406	-0.857927	-0.793022	-0.759624	-0.702692	-0.600149
1.332	-1.51617	-1.44142	-1.35441	-1.34262	-1.31585	-1.21649	-1.02948	-0.854614	-0.790733	-0.756371	-0.699669	-0.597277
1.333	-1.51132	-1.43437	-1.34783	-1.33721	-1.30963	-1.21208	-1.02506	-0.851313	-0.788617	-0.752887	-0.696749	-0.594756
1.334	-1.50619	-1.42743	-1.34106	-1.33227	-1.30317	-1.20779	-1.02094	-0.847904	-0.7865	-0.749148	-0.693981	-0.592552
1.335	-1.50095	-1.42054	-1.33412	-1.32748	-1.2966	-1.20359	-1.01723	-0.844391	-0.784126	-0.745204	-0.691246	-0.590717
1.336	-1.49579	-1.41364	-1.32712	-1.32252	-1.28976	-1.19951	-1.01396	-0.840854	-0.781396	-0.74113	-0.688514	-0.589276
1.337	-1.4907	-1.40674	-1.32019	-1.31729	-1.28232	-1.19547	-1.01112	-0.83727	-0.778445	-0.737004	-0.685954	-0.588152
1.338	-1.48563	-1.39983	-1.31343	-1.31188	-1.27424	-1.19139	-1.0086	-0.833614	-0.775416	-0.732963	-0.683648	-0.587151
1.339	-1.48056	-1.39285	-1.30682	-1.30636	-1.26582	-1.18717	-1.00604	-0.830173	-0.772276	-0.729191	-0.681377	-0.585992
1.34	-1.47552	-1.38577	-1.30034	-1.30066	-1.25741	-1.18277	-1.0032	-0.827424	-0.769006	-0.725787	-0.678937	-0.584451
1.341	-1.47046	-1.37864	-1.29402	-1.29462	-1.24915	-1.17817	-1.00007	-0.825354	-0.765757	-0.722709	-0.676335	-0.582479
1.342	-1.46533	-1.3716	-1.28803	-1.28821	-1.24117	-1.17349	-0.996707	-0.823357	-0.762596	-0.719945	-0.673569	-0.580119
1.343	-1.46019	-1.36476	-1.28241	-1.28167	-1.23366	-1.16905	-0.993036	-0.821053	-0.759304	-0.717629	-0.67055	-0.577377
1.344	-1.45517	-1.35808	-1.27698	-1.27531	-1.22677	-1.16499	-0.989014	-0.818634	-0.75569	-0.71588	-0.667243	-0.57424
1.345	-1.45047	-1.35147	-1.27143	-1.26926	-1.22047	-1.16107	-0.984667	-0.816293	-0.752017	-0.714633	-0.663793	-0.570784
1.346	-1.4462	-1.34497	-1.26559	-1.26336	-1.21445	-1.15693	-0.980022	-0.813877	-0.748796	-0.713752	-0.660482	-0.56721
1.347	-1.44241	-1.33864	-1.25952	-1.25736	-1.20843	-1.15242	-0.975146	-0.811189	-0.746131	-0.713159	-0.65739	-0.563767
1.348	-1.43913	-1.33248	-1.25324	-1.25134	-1.20251	-1.14762	-0.970208	-0.808306	-0.743645	-0.712653	-0.654245	-0.560583
1.349	-1.4365	-1.32652	-1.24671	-1.24597	-1.19696	-1.14272	-0.96528	-0.805364	-0.741038	-0.711884	-0.650879	-0.55767
1.35	-1.43447	-1.32081	-1.23988	-1.24205	-1.19172	-1.1379	-0.96027	-0.802214	-0.73828	-0.710627	-0.647588	-0.555072
1.351	-1.43274	-1.3153	-1.23279	-1.2398	-1.18645	-1.13318	-0.955218	-0.798618	-0.735354	-0.70892	-0.644684	-0.552887
1.352	-1.43099	-1.30985	-1.22552	-1.23873	-1.18112	-1.12845	-0.950348	-0.794624	-0.7321	-0.706979	-0.64203	-0.55116
1.353	-1.42899	-1.30438	-1.21824	-1.23803	-1.17606	-1.12368	-0.945785	-0.790468	-0.72841	-0.704929	-0.639335	-0.54975
1.354	-1.42669	-1.29889	-1.21119	-1.23718	-1.17131	-1.11889	-0.941596	-0.786337	-0.724447	-0.702696	-0.636629	-0.548374
1.355	-1.42413	-1.29327	-1.20455	-1.23619	-1.1665	-1.1141	-0.937906	-0.782226	-0.72049	-0.700262	-0.634159	-0.546933
1.356	-1.42133	-1.28733	-1.19838	-1.23538	-1.1614	-1.10938	-0.934688	-0.777896	-0.716689	-0.697722	-0.631971	-0.545571
1.357	-1.41825	-1.28104	-1.19264	-1.23494	-1.15607	-1.10462	-0.931691	-0.773204	-0.713045	-0.695057	-0.629767	-0.54427
1.358	-1.41492	-1.27456	-1.18723	-1.23483	-1.15068	-1.09961	-0.928682	-0.768465	-0.709544	-0.69218	-0.627328	-0.542807
1.359	-1.4114	-1.26806	-1.18194	-1.2347	-1.14525	-1.09423	-0.925678	-0.764198	-0.706151	-0.689172	-0.624866	-0.541077
1.36	-1.40769	-1.26168	-1.17658	-1.234	-1.13956	-1.08859	-0.922826	-0.760524	-0.702808	-0.68618	-0.622713	-0.539032
1.361	-1.40377	-1.25549	-1.17113	-1.23219	-1.13354	-1.08282	-0.920104	-0.757204	-0.699602	-0.683242	-0.620873	-0.536578
1.362	-1.39972	-1.24945	-1.16572	-1.22878	-1.12747	-1.07698	-0.917338	-0.754254	-0.696707	-0.680439	-0.619137	-0.533734
1.363	-1.39569	-1.24351	-1.16043	-1.22336	-1.12176	-1.07114	-0.914417	-0.751978	-0.694214	-0.677922	-0.6174	-0.530679
1.364	-1.39176	-1.23774	-1.15518	-1.21593	-1.1166	-1.06535	-0.911319	-0.750408	-0.692183	-0.675698	-0.61564	-0.527629
1.365	-1.38788	-1.23235	-1.14972	-1.20684	-1.11186	-1.05969	-0.908058	-0.749197	-0.690728	-0.673604	-0.613762	-0.524716
1.366	-1.38404	-1.22744	-1.14382	-1.19646	-1.10736	-1.05418	-0.904621	-0.748022	-0.689845	-0.671499	-0.611532	-0.521957
1.367	-1.38016	-1.22296	-1.13753	-1.18499	-1.1031	-1.0488	-0.900904	-0.746812	-0.689177	-0.669359	-0.608796	-0.519388
1.368	-1.37614	-1.21879	-1.13111	-1.17278	-1.09917	-1.04354	-0.896819	-0.745512	-0.688103	-0.667225	-0.605803	-0.517123
1.369	-1.37199	-1.21478	-1.12482	-1.1603	-1.09553	-1.03843	-0.89242	-0.7439	-0.68621	-0.665102	-0.602952	-0.515229
1.37	-1.36767	-1.21073	-1.11887	-1.14789	-1.09209	-1.03347	-0.887913	-0.741925	-0.683609	-0.662885	-0.600344	-0.513578
1.371	-1.36313	-1.20644	-1.11343	-1.13572	-1.08888	-1.02853	-0.88356	-0.739754	-0.680609	-0.660477	-0.597942	-0.51195
1.372	-1.35841	-1.20173	-1.10849	-1.12392	-1.08594	-1.02347	-0.87962	-0.737388	-0.677443	-0.657922	-0.595952	-0.510299
1.373	-1.35353	-1.19658	-1.10388	-1.11245	-1.08316	-1.0183	-0.876303	-0.734635	-0.674404	-0.655299	-0.594622	-0.508724
1.374	-1.34839	-1.19111	-1.09937	-1.10106	-1.08039	-1.01319	-0.873616	-0.731472	-0.671765	-0.652663	-0.593892	-0.5072
1.375	-1.34295	-1.18553	-1.09484	-1.08952	-1.07762	-1.00827	-0.871343	-0.728229	-0.669549	-0.650139	-0.593549	-0.505602
1.376	-1.33716	-1.18004	-1.09033	-1.07805	-1.07482	-1.00348	-0.869291	-0.725295	-0.667585	-0.647948	-0.593486	-0.503973
1.377	-1.33108	-1.17468	-1.08592	-1.06711	-1.07192	-0.99865	-0.867402	-0.722846	-0.665702	-0.646283	-0.593625	-0.502489
1.378	-1.32482	-1.16942	-1.08153	-1.05697	-1.06876	-0.993752	-0.865598	-0.720764	-0.663873	-0.645094	-0.593824	-0.501169
1.379	-1.31851	-1.16423	-1.07693	-1.04774	-1.06525	-0.988963	-0.863689	-0.718801	-0.662144	-0.644104	-0.593892	-0.499981
1.38	-1.31222	-1.159	-1.07204	-1.0394	-1.06146	-0.984358	-0.861466	-0.716908	-0.660501	-0.643075	-0.593547	-0.49895
1.381	-1.30607	-1.15358	-1.06692	-1.03197	-1.05751	-0.979722	-0.858871	-0.715174	-0.658871	-0.641925	-0.592522	-0.497946
1.382	-1.30023	-1.14808	-1.06165	-1.02555	-1.05331	-0.974902	-0.855927	-0.713504	-0.657142	-0.640578	-0.590741	-0.49677
1.383	-1.29488	-1.14261	-1.05619	-1.02021	-1.04859	-0.97011	-0.852457	-0.711665	-0.655291	-0.638903	-0.588298	-0.495382
1.384	-1.29001	-1.13716	-1.05053	-1.01587	-1.04311	-0.965705	-0.848251	-0.709546	-0.65337	-0.63678	-0.585355	-0.493854
1.385	-1.28538	-1.13172	-1.04471	-1.01246	-1.03699	-0.961907	-0.843563	-0.70724	-0.65129	-0.634097	-0.582099	-0.492218
1.386	-1.28077	-1.12634	-1.03884	-1.0098	-1.03052	-0.95875	-0.838937	-0.704896	-0.648865	-0.630887	-0.578808	-0.490375
1.387	-1.27614	-1.12108	-1.03303	-1.00753	-1.02397	-0.956133	-0.834656	-0.702477	-0.645989	-0.627424	-0.575836	-0.488241
1.388	-1.27152	-1.11587	-1.02737	-1.00531	-1.01722	-0.953914	-0.830742	-0.699829	-0.642782	-0.624023	-0.573382	-0.485933
1.389	-1.26693	-1.11079	-1.02207	-1.00282	-1.0098	-0.952025	-0.827213	-0.696972	-0.639508	-0.620905	-0.571433	-0.483749
1.39	-1.26244	-1.10608	-1.01735	-0.999796	-1.00149	-0.950372	-0.824052	-0.694027	-0.636235	-0.618173	-0.569932	-0.481908
1.391	-1.25817	-1.10186	-1.01325	-0.996267	-0.992869	-0.948721	-0.821133	-0.690977	-0.632877	-0.61577	-0.568857	-0.480257
1.392	-1.25416	-1.09795	-1.00962	-0.992412	-0.984703	-0.946799	-0.818354	-0.687732	-0.629535	-0.613562	-0.568149	-0.478347
1.393	-1.25043	-1.09419	-1.00629	-0.988348	-0.977319	-0.9445	-0.815708	-0.684326	-0.626499	-0.611469	-0.5676	-0.475921
1.394	-1.24681	-1.09042	-1.00292	-0.984121	-0.970792	-0.941925	-0.813187	-0.680924	-0.624012	-0.60946	-0.566879	-0.47328
1.395	-1.24307	-1.08648	-0.999232	-0.979898	-0.965257	-0.939155	-0.810747	-0.67772	-0.622066	-0.60745	-0.565744	-0.470962
1.396	-1.2391	-1.08231	-0.995184	-0.976008	-0.960754	-0.936037	-0.808349	-0.674803	-0.620465	-0.605347	-0.564162	-0.469129
1.397	-1.23503	-1.07793	-0.990882	-0.972694	-0.957014	-0.932381	-0.805915	-0.672024	-0.619136	-0.603178	-0.562202	-0.467588
1.398	-1.23109	-1.07331	-0.986389	-0.96994	-0.953658	-0.928264	-0.803201	-0.669182	-0.618228	-0.601112	-0.559864	-0.466272
1.399	-1.22744	-1.06847	-0.9817	-0.96759	-0.950391	-0.92398	-0.799924	-0.666277	-0.617798	-0.599228	-0.557029	-0.46526
1.4	-1.22407	-1.06352	-0.976843	-0.96555	-0.946873	-0.919773	-0.796069	-0.663344	-0.617534	-0.597359	-0.553642	-0.464426
1.401	-1.22094	-1.05856	-0.971882	-0.963823	-0.942813	-0.915647	-0.791927	-0.660314	-0.6169	-0.595369	-0.549958	-0.463476
1.402	-1.21796	-1.0536	-0.966869	-0.962468	-0.938219	-0.911559	-0.787837	-0.657177	-0.615497	-0.593352	-0.54633	-0.462251
1.403	-1.21509	-1.0486	-0.961933	-0.961629	-0.933254	-0.907642	-0.783999	-0.654049	-0.613165	-0.591351	-0.542837	-0.460794
1.404	-1.21235	-1.04371	-0.957285	-0.961523	-0.928133	-0.903976	-0.780479	-0.651028	-0.609894	-0.589202	-0.539449	-0.459234
1.405	-1.20986	-1.03918	-0.95303	-0.962324	-0.923147	-0.900405	-0.777196	-0.648135	-0.605863	-0.586803	-0.536405	-0.457661
1.406	-1.20765	-1.03507	-0.949116	-0.963912	-0.918446	-0.896747	-0.774063	-0.645349	-0.601378	-0.584248	-0.534129	-0.456104
1.407	-1.20565	-1.03127	-0.945427	-0.965689	-0.914037	-0.893003	-0.771144	-0.642778	-0.596697	-0.581625	-0.532738	-0.45464
1.408	-1.20382	-1.02764	-0.941845	-0.96687	-0.910017	-0.889302	-0.768461	-0.640727	-0.592033	-0.578978	-0.531798	-0.453363
1.409	-1.2022	-1.02405	-0.938267	-0.966947	-0.906547	-0.885789	-0.765838	-0.639352	-0.587619	-0.576441	-0.53073	-0.452207
1.41	-1.20085	-1.02034	-0.934563	-0.965907	-0.903666	-0.882566	-0.763142	-0.6384	-0.583646	-0.574163	-0.5294	-0.450939
1.411	-1.19973	-1.01642	-0.930587	-0.964202	-0.901273	-0.879652	-0.760515	-0.637503	-0.580194	-0.572166	-0.52809	-0.449352
1.412	-1.19865	-1.0123	-0.926317	-0.962493	-0.899141	-0.87688	-0.758202	-0.636607	-0.57731	-0.5704	-0.526991	-0.447425
1.413	-1.19739	-1.00799	-0.921856	-0.96131	-0.896948	-0.873918	-0.75623	-0.635893	-0.575068	-0.568891	-0.526034	-0.445295
1.414	-1.1957	-1.00352	-0.917287	-0.960919	-0.89444	-0.870523	-0.754395	-0.635289	-0.573495	-0.567683	-0.525099	-0.443032
1.415	-1.19341	-0.998957	-0.912658	-0.961129	-0.891501	-0.866744	-0.752445	-0.634382	-0.572447	-0.566612	-0.524056	-0.440586
1.416	-1.1906	-0.994469	-0.908011	-0.961224	-0.888156	-0.862831	-0.750178	-0.632952	-0.57164	-0.565342	-0.52272	-0.437885
1.417	-1.18751	-0.990143	-0.90335	-0.960457	-0.88459	-0.85893	-0.747384	-0.631191	-0.570828	-0.563725	-0.521053	-0.434956
1.418	-1.18423	-0.985827	-0.898675	-0.958502	-0.881022	-0.854912	-0.743909	-0.62923	-0.56989	-0.561907	-0.519248	-0.432052
1.419	-1.18072	-0.98132	-0.893995	-0.955264	-0.87754	-0.850651	-0.739989	-0.626901	-0.568841	-0.560141	-0.517427	-0.4295
1.42	-1.17689	-0.976571	-0.889336	-0.950598	-0.874077	-0.846331	-0.736103	-0.624063	-0.567761	-0.558539	-0.51542	-0.427379
1.421	-1.17267	-0.971686	-0.88482	-0.944423	-0.87054	-0.842282	-0.732479	-0.620903	-0.566603	-0.55698	-0.513003	-0.425501
1.422	-1.16806	-0.966841	-0.880588	-0.936987	-0.867003	-0.838593	-0.729023	-0.617792	-0.565179	-0.555353	-0.510219	-0.423695
1.423	-1.1632	-0.962174	-0.876691	-0.928925	-0.863608	-0.835028	-0.72562	-0.614968	-0.563468	-0.553733	-0.507415	-0.422061
1.424	-1.15818	-0.957717	-0.873093	-0.920925	-0.860332	-0.831335	-0.722413	-0.612407	-0.561698	-0.552168	-0.504915	-0.420893
1.425	-1.15308	-0.953444	-0.869761	-0.913225	-0.857017	-0.827541	-0.719682	-0.610044	-0.560067	-0.55054	-0.502689	-0.42031
1.426	-1.1481	-0.949445	-0.866691	-0.905563	-0.853573	-0.823901	-0.717516	-0.607977	-0.558604	-0.548782	-0.500604	-0.420035
1.427	-1.14346	-0.945887	-0.863844	-0.897608	-0.850068	-0.820559	-0.715765	-0.606335	-0.557181	-0.547077	-0.498802	-0.419673
1.428	-1.13925	-0.942755	-0.861138	-0.889267	-0.846559	-0.817359	-0.714263	-0.605072	-0.555599	-0.545706	-0.497466	-0.41911
1.429	-1.13534	-0.939854	-0.85845	-0.880652	-0.842878	-0.81408	-0.71296	-0.603968	-0.553831	-0.544765	-0.496507	-0.418364
1.43	-1.13144	-0.936991	-0.855627	-0.871847	-0.838648	-0.810782	-0.711824	-0.602858	-0.55211	-0.544042	-0.495689	-0.417345
1.431	-1.1273	-0.934058	-0.852619	-0.862877	-0.83364	-0.807793	-0.710665	-0.601844	-0.550643	-0.543225	-0.494767	-0.415959
1.432	-1.12287	-0.931004	-0.849489	-0.853963	-0.828006	-0.805352	-0.709162	-0.601016	-0.549281	-0.54222	-0.493514	-0.414251
1.433	-1.11813	-0.927787	-0.846282	-0.845551	-0.822169	-0.803388	-0.707133	-0.60011	-0.547668	-0.541128	-0.491873	-0.412409
1.434	-1.1131	-0.924359	-0.842929	-0.837949	-0.816616	-0.801687	-0.704647	-0.598796	-0.545804	-0.539964	-0.489993	-0.410644
1.435	-1.10797	-0.920668	-0.83937	-0.831065	-0.811703	-0.800066	-0.701796	-0.597049	-0.544118	-0.538538	-0.487992	-0.409082
1.436	-1.10308	-0.916687	-0.835676	-0.824572	-0.807586	-0.798332	-0.698525	-0.59504	-0.542928	-0.536686	-0.485844	-0.407776
1.437	-1.09856	-0.912426	-0.831924	-0.818342	-0.804188	-0.796299	-0.694872	-0.592828	-0.542123	-0.534534	-0.483627	-0.406739
1.438	-1.09426	-0.907864	-0.828148	-0.812554	-0.801293	-0.793796	-0.691207	-0.59028	-0.541351	-0.5324	-0.481645	-0.405988
1.439	-1.0899	-0.902977	-0.824457	-0.807284	-0.798862	-0.790704	-0.688006	-0.587349	-0.540373	-0.53044	-0.480221	-0.405485
1.44	-1.08532	-0.897907	-0.821001	-0.802307	-0.797003	-0.787095	-0.685425	-0.584359	-0.539201	-0.528523	-0.479411	-0.40504
1.441	-1.08058	-0.892917	-0.817857	-0.797444	-0.795603	-0.783196	-0.683363	-0.581704	-0.537837	-0.526448	-0.478918	-0.404469
1.442	-1.07588	-0.8882	-0.815003	-0.792745	-0.794244	-0.779125	-0.68185	-0.579345	-0.53611	-0.524163	-0.478443	-0.40381
1.443	-1.07134	-0.883866	-0.812306	-0.788237	-0.792583	-0.774759	-0.681022	-0.576942	-0.533893	-0.521791	-0.478108	-0.403248
1.444	-1.06708	-0.879987	-0.809571	-0.783786	-0.790629	-0.770041	-0.680805	-0.574295	-0.531249	-0.519509	-0.4781	-0.402849
1.445	-1.06329	-0.87648	-0.806646	-0.779323	-0.788536	-0.765219	-0.6809	-0.57141	-0.528317	-0.517349	-0.478082	-0.402474
1.446	-1.06003	-0.873154	-0.803448	-0.775045	-0.786301	-0.760581	-0.681005	-0.568427	-0.52523	-0.515272	-0.477614	-0.402013
1.447	-1.05721	-0.869933	-0.799958	-0.771111	-0.783714	-0.756244	-0.680934	-0.565648	-0.522168	-0.513392	-0.476912	-0.401429
1.448	-1.05474	-0.86688	-0.796188	-0.767356	-0.780484	-0.752298	-0.680545	-0.56333	-0.519371	-0.511769	-0.476529	-0.400528
1.449	-1.05252	-0.864019	-0.792149	-0.763632	-0.77648	-0.748873	-0.679643	-0.561412	-0.517026	-0.510109	-0.476498	-0.399001
1.45	-1.05055	-0.861267	-0.787912	-0.760104	-0.771906	-0.746044	-0.678006	-0.559651	-0.515136	-0.508027	-0.476251	-0.396774
1.451	-1.04884	-0.858547	-0.783683	-0.757121	-0.767197	-0.743752	-0.675543	-0.557927	-0.51348	-0.505635	-0.475385	-0.394173
1.452	-1.04743	-0.855877	-0.779725	-0.754885	-0.76269	-0.741827	-0.672369	-0.55624	-0.51178	-0.503466	-0.474091	-0.391644
1.453	-1.04638	-0.853321	-0.776152	-0.753245	-0.758497	-0.740119	-0.668683	-0.554501	-0.509949	-0.501801	-0.472662	-0.389342
1.454	-1.04576	-0.850888	-0.772899	-0.752022	-0.754679	-0.738499	-0.664689	-0.552591	-0.508158	-0.500485	-0.470954	-0.387213
1.455	-1.04546	-0.848475	-0.769884	-0.751077	-0.751419	-0.736758	-0.660624	-0.550607	-0.506563	-0.499329	-0.468625	-0.385276
1.456	-1.04528	-0.845971	-0.767057	-0.749858	-0.748962	-0.73468	-0.656711	-0.548743	-0.505091	-0.498331	-0.465715	-0.383512
1.457	-1.04514	-0.843376	-0.764338	-0.747813	-0.747316	-0.732165	-0.653138	-0.547004	-0.503652	-0.497542	-0.462584	-0.381797
1.458	-1.04509	-0.840682	-0.7617	-0.745132	-0.746164	-0.729274	-0.649985	-0.545291	-0.50235	-0.496903	-0.459465	-0.380129
1.459	-1.04513	-0.837826	-0.759272	-0.742332	-0.745147	-0.726119	-0.647191	-0.543532	-0.501295	-0.496096	-0.45654	-0.378667
1.46	-1.04512	-0.834839	-0.757172	-0.739638	-0.744061	-0.722704	-0.644716	-0.54175	-0.500414	-0.494687	-0.454124	-0.377497
1.461	-1.04492	-0.831858	-0.755302	-0.737017	-0.742843	-0.719052	-0.642564	-0.540073	-0.499602	-0.492614	-0.452441	-0.376513
1.462	-1.04443	-0.828977	-0.753422	-0.73419	-0.741447	-0.715344	-0.640565	-0.538596	-0.498861	-0.49024	-0.451386	-0.375607
1.463	-1.04357	-0.826231	-0.751357	-0.730668	-0.739708	-0.711673	-0.638497	-0.537297	-0.498175	-0.487932	-0.450602	-0.374899
1.464	-1.04222	-0.823679	-0.749083	-0.726397	-0.737408	-0.7079	-0.636348	-0.536128	-0.497438	-0.485929	-0.449803	-0.374572
1.465	-1.04029	-0.821328	-0.746669	-0.721981	-0.734459	-0.703963	-0.634208	-0.535049	-0.496575	-0.484449	-0.448891	-0.374476
1.466	-1.03788	-0.819015	-0.744155	-0.718001	-0.730949	-0.70012	-0.632124	-0.534062	-0.495591	-0.483564	-0.447725	-0.374104
1.467	-1.03529	-0.816546	-0.741447	-0.714706	-0.727071	-0.6967	-0.629997	-0.533242	-0.494526	-0.48302	-0.446151	-0.37321
1.468	-1.03278	-0.813878	-0.738392	-0.712238	-0.723085	-0.69378	-0.627621	-0.532531	-0.493265	-0.482417	-0.444325	-0.372156
1.469	-1.03036	-0.811072	-0.734995	-0.710617	-0.719317	-0.691196	-0.624891	-0.531578	-0.491469	-0.481588	-0.442647	-0.371391
1.47	-1.02787	-0.808238	-0.731381	-0.709535	-0.71604	-0.688768	-0.621862	-0.530129	-0.488947	-0.480599	-0.441416	-0.370964
1.471	-1.02523	-0.805459	-0.727652	-0.708437	-0.713006	-0.686577	-0.618575	-0.528358	-0.485937	-0.479422	-0.440722	-0.370624
1.472	-1.02246	-0.802704	-0.723924	-0.706876	-0.709372	-0.684812	-0.614991	-0.526679	-0.48288	-0.477983	-0.440496	-0.370243
1.473	-1.01961	-0.799857	-0.720337	-0.704771	-0.704728	-0.683281	-0.611226	-0.525422	-0.480042	-0.476434	-0.440547	-0.369997
1.474	-1.01675	-0.796844	-0.716997	-0.702218	-0.699625	-0.681584	-0.607679	-0.52459	-0.477486	-0.475058	-0.440643	-0.370121
1.475	-1.01399	-0.793673	-0.713962	-0.698951	-0.694701	-0.679705	-0.604781	-0.523941	-0.475292	-0.473949	-0.440591	-0.370645
1.476	-1.01137	-0.790335	-0.711244	-0.694346	-0.690151	-0.677967	-0.602765	-0.523332	-0.473675	-0.472914	-0.440277	-0.371413
1.477	-1.00878	-0.78679	-0.708733	-0.688268	-0.686066	-0.676488	-0.601606	-0.522832	-0.472795	-0.47178	-0.439836	-0.372339
1.478	-1.00598	-0.783074	-0.706241	-0.681408	-0.682646	-0.674955	-0.60116	-0.522538	-0.472467	-0.470629	-0.439564	-0.373552
1.479	-1.00269	-0.77932	-0.703659	-0.674621	-0.680025	-0.673015	-0.601286	-0.522418	-0.472214	-0.469593	-0.439499	-0.375091
1.48	-0.998824	-0.775679	-0.701024	-0.668481	-0.67812	-0.670679	-0.601758	-0.522348	-0.471691	-0.468566	-0.439376	-0.376683
1.481	-0.994395	-0.772315	-0.698416	-0.66339	-0.676725	-0.668164	-0.602268	-0.522274	-0.471087	-0.467293	-0.438994	-0.378094
1.482	-0.989487	-0.76938	-0.695923	-0.659656	-0.675696	-0.665575	-0.602628	-0.522142	-0.470801	-0.465693	-0.438413	-0.379431
1.483	-0.984223	-0.766915	-0.693662	-0.65734	-0.674958	-0.662915	-0.60284	-0.52172	-0.470754	-0.463972	-0.437789	-0.380879
1.484	-0.97873	-0.764804	-0.691665	-0.656141	-0.674432	-0.660209	-0.602936	-0.520772	-0.47057	-0.462352	-0.437184	-0.382321
1.485	-0.973077	-0.762782	-0.68984	-0.655551	-0.673982	-0.657553	-0.602845	-0.519312	-0.470228	-0.460815	-0.436567	-0.383321
1.486	-0.967353	-0.760605	-0.688018	-0.655207	-0.67348	-0.655118	-0.602483	-0.5175	-0.469976	-0.459187	-0.435891	-0.383475
1.487	-0.961766	-0.758219	-0.686034	-0.655051	-0.672918	-0.653003	-0.601896	-0.515457	-0.469791	-0.457421	-0.435216	-0.382711
1.488	-0.956519	-0.755714	-0.683821	-0.655124	-0.672342	-0.651127	-0.601168	-0.513275	-0.469397	-0.455667	-0.434738	-0.381183
1.489	-0.951696	-0.753153	-0.681345	-0.655224	-0.671635	-0.649366	-0.600287	-0.510985	-0.468742	-0.454024	-0.434545	-0.379058
1.49	-0.947308	-0.750521	-0.678558	-0.654921	-0.670476	-0.647639	-0.599104	-0.508514	-0.468061	-0.452441	-0.434455	-0.376441
1.491	-0.943324	-0.747784	-0.675501	-0.653913	-0.668623	-0.645848	-0.597462	-0.505832	-0.467478	-0.450902	-0.434262	-0.373392
1.492	-0.93973	-0.744915	-0.672303	-0.65217	-0.666158	-0.643808	-0.595384	-0.503028	-0.466825	-0.449522	-0.433959	-0.370038
1.493	-0.936591	-0.741894	-0.669062	-0.649745	-0.663299	-0.641387	-0.593026	-0.50022	-0.465922	-0.448421	-0.433634	-0.366582
1.494	-0.933946	-0.73872	-0.665791	-0.646678	-0.660136	-0.63871	-0.590449	-0.497596	-0.464867	-0.447506	-0.433123	-0.363058
1.495	-0.931832	-0.735427	-0.662498	-0.643125	-0.656698	-0.636058	-0.587564	-0.49541	-0.46388	-0.446457	-0.431987	-0.359305
1.496	-0.930357	-0.732116	-0.659293	-0.6394	-0.652994	-0.633637	-0.584389	-0.493814	-0.462904	-0.445075	-0.430009	-0.355363
1.497	-0.929483	-0.728943	-0.65627	-0.635795	-0.649037	-0.631483	-0.581137	-0.492894	-0.461615	-0.44341	-0.427457	-0.351557
1.498	-0.928983	-0.726053	-0.653401	-0.63244	-0.644851	-0.629557	-0.57792	-0.492694	-0.459928	-0.441499	-0.42475	-0.348073
1.499	-0.928723	-0.723479	-0.650645	-0.629357	-0.640435	-0.62784	-0.574652	-0.493074	-0.458145	-0.439312	-0.422062	-0.344768
1.5	-0.928675	-0.721121	-0.648004	-0.626661	-0.635816	-0.626291	-0.571274	-0.493765	-0.456455	-0.436873	-0.419347	-0.341546
1.501	-0.928778	-0.718799	-0.645421	-0.62454	-0.631152	-0.624744	-0.567856	-0.49456	-0.454712	-0.4343	-0.416571	-0.338626
1.502	-0.928909	-0.716411	-0.642778	-0.62299	-0.626729	-0.622963	-0.564516	-0.495303	-0.452831	-0.431839	-0.413765	-0.336159
1.503	-0.928929	-0.714033	-0.640077	-0.621767	-0.62288	-0.620847	-0.561291	-0.495788	-0.450991	-0.42964	-0.410962	-0.333882
1.504	-0.928763	-0.711786	-0.637526	-0.620671	-0.61991	-0.618503	-0.558105	-0.495856	-0.449403	-0.427574	-0.408207	-0.331507
1.505	-0.928418	-0.70968	-0.635328	-0.619702	-0.617966	-0.615993	-0.554942	-0.495507	-0.448032	-0.425563	-0.405573	-0.329126
1.506	-0.927926	-0.707728	-0.633437	-0.618812	-0.616954	-0.61325	-0.551948	-0.494783	-0.446635	-0.423779	-0.403195	-0.326962
1.507	-0.927419	-0.70606	-0.631637	-0.617678	-0.616596	-0.610441	-0.549293	-0.493579	-0.445052	-0.422382	-0.401117	-0.325027
1.508	-0.927131	-0.704772	-0.629775	-0.616032	-0.616566	-0.607947	-0.54699	-0.491727	-0.443274	-0.421249	-0.399118	-0.323217
1.509	-0.927172	-0.703825	-0.627826	-0.613953	-0.616639	-0.605862	-0.544901	-0.489245	-0.441234	-0.420252	-0.397026	-0.321567
1.51	-0.92744	-0.703043	-0.625807	-0.611668	-0.616674	-0.603904	-0.54296	-0.486406	-0.438729	-0.419573	-0.395071	-0.320141
1.511	-0.927822	-0.702105	-0.623709	-0.609297	-0.616564	-0.601874	-0.541206	-0.483492	-0.435719	-0.419329	-0.393529	-0.318827
1.512	-0.928235	-0.700736	-0.62147	-0.606815	-0.616263	-0.599838	-0.539535	-0.480554	-0.432576	-0.419336	-0.392241	-0.317478
1.513	-0.928493	-0.698876	-0.618978	-0.604167	-0.61581	-0.59794	-0.537697	-0.477543	-0.429721	-0.419366	-0.390711	-0.316103
1.514	-0.928307	-0.696577	-0.616208	-0.601451	-0.615269	-0.596306	-0.535554	-0.474489	-0.427233	-0.419293	-0.388602	-0.314754
1.515	-0.927413	-0.693973	-0.613291	-0.599073	-0.614582	-0.594871	-0.533179	-0.471404	-0.424992	-0.419136	-0.385989	-0.313419
1.516	-0.925703	-0.691263	-0.610346	-0.597521	-0.613451	-0.593364	-0.530705	-0.468164	-0.422881	-0.418895	-0.383146	-0.312126
1.517	-0.923216	-0.688578	-0.607396	-0.596741	-0.611327	-0.591656	-0.528159	-0.46467	-0.420783	-0.41833	-0.380251	-0.310918
1.518	-0.920121	-0.685924	-0.604485	-0.596059	-0.607727	-0.589852	-0.525505	-0.461082	-0.418634	-0.416894	-0.377341	-0.309729
1.519	-0.916655	-0.683315	-0.601755	-0.594883	-0.602753	-0.588037	-0.522837	-0.457672	-0.41647	-0.41398	-0.374496	-0.308603
1.52	-0.912973	-0.680812	-0.599405	-0.593082	-0.597004	-0.586192	-0.520343	-0.454495	-0.41436	-0.409626	-0.37186	-0.307765
1.521	-0.909166	-0.678432	-0.597551	-0.590792	-0.591108	-0.584254	-0.518026	-0.451368	-0.412341	-0.404666	-0.369512	-0.307347
1.522	-0.905333	-0.676152	-0.596191	-0.588276	-0.585646	-0.582063	-0.515796	-0.448151	-0.410369	-0.399967	-0.36753	-0.307371
1.523	-0.901577	-0.673861	-0.595263	-0.585895	-0.581217	-0.579494	-0.513818	-0.445032	-0.408362	-0.396034	-0.366097	-0.307813
1.524	-0.897989	-0.67126	-0.594627	-0.583868	-0.578272	-0.576633	-0.512363	-0.442364	-0.406307	-0.393201	-0.365328	-0.308505
1.525	-0.89458	-0.668084	-0.594095	-0.582079	-0.5769	-0.573589	-0.511514	-0.440193	-0.404224	-0.391678	-0.365051	-0.309263
1.526	-0.891308	-0.664449	-0.593558	-0.580347	-0.57682	-0.57039	-0.511149	-0.438142	-0.402125	-0.391347	-0.364998	-0.310051
1.527	-0.888167	-0.660755	-0.592975	-0.578733	-0.577644	-0.56714	-0.511114	-0.435861	-0.400126	-0.391689	-0.365102	-0.310781
1.528	-0.885111	-0.657264	-0.592204	-0.577325	-0.579091	-0.564031	-0.511408	-0.4334	-0.398496	-0.392159	-0.365441	-0.31124
1.529	-0.881987	-0.654025	-0.591038	-0.575982	-0.58078	-0.561168	-0.512083	-0.430998	-0.397357	-0.392506	-0.365941	-0.311272
1.53	-0.878562	-0.651095	-0.589367	-0.574563	-0.582074	-0.558542	-0.512992	-0.428725	-0.396529	-0.392668	-0.36635	-0.310894
1.531	-0.874642	-0.648562	-0.587202	-0.573162	-0.582451	-0.556191	-0.513795	-0.426497	-0.395885	-0.392614	-0.366508	-0.310243
1.532	-0.870202	-0.646417	-0.58471	-0.571909	-0.581752	-0.554234	-0.514177	-0.424356	-0.395569	-0.39234	-0.366447	-0.309398
1.533	-0.865347	-0.644534	-0.582114	-0.570789	-0.579971	-0.552716	-0.514095	-0.422532	-0.395693	-0.39199	-0.366254	-0.308283
1.534	-0.86012	-0.642729	-0.579483	-0.569727	-0.577176	-0.551522	-0.51374	-0.421103	-0.39603	-0.391811	-0.365959	-0.306897
1.535	-0.854531	-0.640857	-0.576785	-0.568625	-0.573592	-0.550508	-0.513208	-0.419883	-0.396162	-0.39183	-0.365556	-0.30544
1.536	-0.848761	-0.638953	-0.574095	-0.567364	-0.569517	-0.549635	-0.512427	-0.418821	-0.395873	-0.391802	-0.365033	-0.304092
1.537	-0.843099	-0.637158	-0.571578	-0.56597	-0.565239	-0.548797	-0.511304	-0.418101	-0.395233	-0.391534	-0.364427	-0.302975
1.538	-0.837785	-0.635496	-0.569314	-0.564623	-0.56102	-0.547665	-0.509842	-0.417754	-0.394282	-0.390931	-0.363979	-0.302243
1.539	-0.832932	-0.633886	-0.56721	-0.563355	-0.556996	-0.545968	-0.508128	-0.417536	-0.393002	-0.3898	-0.36392	-0.301881
1.54	-0.828508	-0.632279	-0.565111	-0.561987	-0.553171	-0.543853	-0.506256	-0.41728	-0.391642	-0.388057	-0.364101	-0.301651
1.541	-0.824562	-0.630667	-0.562972	-0.560414	-0.549578	-0.54173	-0.504394	-0.417055	-0.390577	-0.385973	-0.364136	-0.301441
1.542	-0.821384	-0.629082	-0.560848	-0.558732	-0.546352	-0.539878	-0.502771	-0.416943	-0.389828	-0.383937	-0.363787	-0.301361
1.543	-0.819232	-0.627641	-0.558803	-0.557043	-0.543664	-0.538368	-0.501435	-0.416917	-0.389159	-0.382212	-0.363138	-0.301482
1.544	-0.818127	-0.62646	-0.556876	-0.555283	-0.541554	-0.537188	-0.500217	-0.416854	-0.388643	-0.380915	-0.362516	-0.301633
1.545	-0.817971	-0.625492	-0.555081	-0.55336	-0.539923	-0.536275	-0.498964	-0.416612	-0.388667	-0.380071	-0.362201	-0.301544
1.546	-0.818559	-0.62454	-0.553465	-0.551344	-0.538698	-0.53544	-0.497671	-0.416184	-0.38926	-0.379671	-0.362211	-0.301129
1.547	-0.819544	-0.623489	-0.552119	-0.549383	-0.537795	-0.534452	-0.496424	-0.415654	-0.389909	-0.379628	-0.362413	-0.30053
1.548	-0.820644	-0.622399	-0.551021	-0.54755	-0.537011	-0.533222	-0.495179	-0.415015	-0.390231	-0.37974	-0.362741	-0.299902
1.549	-0.821779	-0.621372	-0.549998	-0.54579	-0.536178	-0.531844	-0.493713	-0.414226	-0.390394	-0.379728	-0.363153	-0.29931
1.55	-0.822916	-0.620468	-0.548896	-0.543873	-0.535267	-0.530436	-0.491964	-0.413367	-0.390651	-0.37934	-0.363448	-0.298872
1.551	-0.824016	-0.619729	-0.547675	-0.541554	-0.534323	-0.528978	-0.490248	-0.412646	-0.39089	-0.378545	-0.363378	-0.298791
1.552	-0.825153	-0.619048	-0.546363	-0.538935	-0.533362	-0.527342	-0.488855	-0.412151	-0.390858	-0.37754	-0.362909	-0.299156
1.553	-0.826412	-0.618142	-0.54491	-0.536379	-0.532298	-0.525469	-0.487627	-0.41163	-0.390494	-0.37649	-0.36221	-0.2999
1.554	-0.827759	-0.616795	-0.543189	-0.534078	-0.531058	-0.523438	-0.486208	-0.410853	-0.389809	-0.375393	-0.361362	-0.300855
1.555	-0.829094	-0.614938	-0.541187	-0.531988	-0.529681	-0.521398	-0.484576	-0.409974	-0.38871	-0.374193	-0.360268	-0.30178
1.556	-0.830304	-0.612495	-0.539002	-0.530063	-0.528232	-0.519447	-0.48308	-0.409235	-0.387151	-0.372894	-0.358931	-0.302495
1.557	-0.831306	-0.609482	-0.536736	-0.528332	-0.526737	-0.517661	-0.48204	-0.408604	-0.385302	-0.371553	-0.357619	-0.303029
1.558	-0.832071	-0.606156	-0.534441	-0.526747	-0.525219	-0.516124	-0.481478	-0.407938	-0.383436	-0.370191	-0.356645	-0.303472
1.559	-0.832582	-0.602868	-0.532168	-0.525183	-0.523794	-0.514771	-0.481246	-0.407294	-0.381749	-0.368781	-0.356069	-0.303687
1.56	-0.83285	-0.599822	-0.529998	-0.523562	-0.52258	-0.513467	-0.48123	-0.406884	-0.380391	-0.367334	-0.355679	-0.30337
1.561	-0.832949	-0.597087	-0.527964	-0.521793	-0.52151	-0.512242	-0.481343	-0.406785	-0.379611	-0.365956	-0.355317	-0.302348
1.562	-0.832935	-0.594685	-0.526033	-0.519775	-0.520466	-0.511181	-0.481421	-0.406795	-0.379619	-0.364748	-0.355065	-0.300654
1.563	-0.832798	-0.592609	-0.524196	-0.517576	-0.519567	-0.510275	-0.481245	-0.406672	-0.380295	-0.363792	-0.355014	-0.298432
1.564	-0.832478	-0.590885	-0.52244	-0.515398	-0.519074	-0.509536	-0.480621	-0.406306	-0.381226	-0.363259	-0.354982	-0.295907
1.565	-0.831925	-0.58952	-0.520692	-0.513372	-0.519003	-0.509009	-0.479429	-0.405683	-0.382068	-0.363203	-0.354648	-0.293342
1.566	-0.831151	-0.5884	-0.518934	-0.511594	-0.519149	-0.508642	-0.477634	-0.404882	-0.382678	-0.363354	-0.353898	-0.290921
1.567	-0.830182	-0.587366	-0.517245	-0.510118	-0.51948	-0.508294	-0.475269	-0.404078	-0.382868	-0.363352	-0.352856	-0.288755
1.568	-0.829021	-0.586283	-0.515713	-0.508804	-0.520081	-0.507783	-0.472429	-0.403386	-0.382382	-0.362993	-0.351612	-0.286968
1.569	-0.827715	-0.585055	-0.514363	-0.507414	-0.520864	-0.506914	-0.469344	-0.402721	-0.381156	-0.362243	-0.350129	-0.285659
1.57	-0.826334	-0.583654	-0.513099	-0.505782	-0.521635	-0.505651	-0.466318	-0.401824	-0.379336	-0.36118	-0.348461	-0.28482
1.571	-0.824905	-0.582101	-0.511799	-0.503878	-0.522256	-0.504143	-0.46356	-0.400406	-0.377224	-0.359898	-0.346713	-0.284281
1.572	-0.823391	-0.580413	-0.510468	-0.501813	-0.522689	-0.50251	-0.461125	-0.398443	-0.375124	-0.358458	-0.344764	-0.283857
1.573	-0.821734	-0.578553	-0.509213	-0.499643	-0.522944	-0.500747	-0.458961	-0.396373	-0.373155	-0.35698	-0.342517	-0.2836
1.574	-0.819899	-0.576416	-0.508109	-0.497188	-0.522896	-0.498804	-0.45706	-0.39475	-0.371355	-0.355645	-0.340279	-0.283681
1.575	-0.81784	-0.573985	-0.507058	-0.494247	-0.522271	-0.496671	-0.455557	-0.393746	-0.369794	-0.354502	-0.338569	-0.283967
1.576	-0.81551	-0.571473	-0.505836	-0.49086	-0.520852	-0.494536	-0.454585	-0.393215	-0.368486	-0.353452	-0.337628	-0.283996
1.577	-0.812968	-0.569113	-0.504317	-0.487194	-0.518703	-0.492595	-0.454152	-0.393045	-0.367293	-0.352488	-0.337263	-0.283357
1.578	-0.810375	-0.566971	-0.502506	-0.483424	-0.516149	-0.49072	-0.454195	-0.393183	-0.365976	-0.351797	-0.337081	-0.28201
1.579	-0.807754	-0.565049	-0.500378	-0.479758	-0.513449	-0.488771	-0.454583	-0.393504	-0.364457	-0.351517	-0.336759	-0.280258
1.58	-0.804871	-0.563336	-0.49794	-0.476354	-0.510576	-0.486928	-0.45509	-0.393846	-0.362999	-0.351541	-0.336241	-0.278361
1.581	-0.80138	-0.561766	-0.495403	-0.473299	-0.507359	-0.485462	-0.455396	-0.394192	-0.361901	-0.351698	-0.335624	-0.276383
1.582	-0.797031	-0.560286	-0.493009	-0.470713	-0.503798	-0.484436	-0.455311	-0.394618	-0.361169	-0.351951	-0.334983	-0.274435
1.583	-0.791787	-0.558886	-0.490754	-0.468717	-0.500092	-0.483708	-0.454867	-0.395021	-0.360661	-0.352302	-0.334432	-0.272779
1.584	-0.785818	-0.557526	-0.488557	-0.467365	-0.496411	-0.483021	-0.454043	-0.395148	-0.360345	-0.35263	-0.33401	-0.271635
1.585	-0.779412	-0.556241	-0.486518	-0.466734	-0.4929	-0.482185	-0.452701	-0.394834	-0.360225	-0.352782	-0.333587	-0.271006
1.586	-0.772879	-0.555369	-0.484788	-0.466824	-0.48977	-0.481183	-0.450775	-0.394029	-0.36009	-0.352771	-0.333054	-0.270626
1.587	-0.766495	-0.555404	-0.483396	-0.467356	-0.487192	-0.479993	-0.448292	-0.392757	-0.35959	-0.352665	-0.332418	-0.270132
1.588	-0.760483	-0.556432	-0.482366	-0.467987	-0.485173	-0.478571	-0.445276	-0.391141	-0.358546	-0.352378	-0.331683	-0.269382
1.589	-0.755029	-0.557918	-0.481792	-0.4685	-0.483558	-0.476972	-0.44172	-0.389351	-0.357111	-0.351741	-0.330842	-0.268397
1.59	-0.750407	-0.559157	-0.481628	-0.468708	-0.482178	-0.47525	-0.437763	-0.3875	-0.355696	-0.350684	-0.329968	-0.267231
1.591	-0.746893	-0.559681	-0.481615	-0.468536	-0.481057	-0.473409	-0.433741	-0.385646	-0.354562	-0.349223	-0.329127	-0.266018
1.592	-0.744546	-0.55931	-0.481527	-0.468158	-0.480378	-0.47148	-0.429973	-0.383802	-0.353591	-0.347442	-0.328285	-0.264838
1.593	-0.743193	-0.558093	-0.481304	-0.46777	-0.480188	-0.469547	-0.426527	-0.381846	-0.352651	-0.345506	-0.327347	-0.263623
1.594	-0.742551	-0.556176	-0.480946	-0.467417	-0.480291	-0.467716	-0.423257	-0.379588	-0.351813	-0.34355	-0.326227	-0.262387
1.595	-0.742344	-0.553682	-0.480357	-0.467161	-0.480398	-0.466	-0.420167	-0.377039	-0.351066	-0.34161	-0.324871	-0.261346
1.596	-0.742336	-0.550704	-0.479308	-0.467182	-0.480217	-0.464291	-0.417539	-0.374462	-0.350193	-0.339705	-0.323262	-0.260746
1.597	-0.74235	-0.547396	-0.477622	-0.467573	-0.479447	-0.462486	-0.41556	-0.372128	-0.349049	-0.337888	-0.32134	-0.260643
1.598	-0.742365	-0.543958	-0.475335	-0.468203	-0.47783	-0.460598	-0.414105	-0.370123	-0.347786	-0.33617	-0.318957	-0.260968
1.599	-0.742419	-0.540594	-0.472634	-0.468883	-0.475213	-0.458672	-0.413009	-0.368381	-0.346715	-0.334482	-0.316066	-0.261687
1.6	-0.742449	-0.537461	-0.469679	-0.469466	-0.471663	-0.456682	-0.41235	-0.366903	-0.345978	-0.332788	-0.312887	-0.262747
1.601	-0.742299	-0.534551	-0.466589	-0.469749	-0.467446	-0.454689	-0.412235	-0.365863	-0.345342	-0.331199	-0.309812	-0.263912
1.602	-0.741854	-0.53184	-0.463572	-0.469561	-0.462809	-0.452893	-0.412471	-0.365317	-0.344449	-0.329838	-0.307162	-0.264912
1.603	-0.741143	-0.529531	-0.460877	-0.46895	-0.457919	-0.451421	-0.412831	-0.364989	-0.343265	-0.328727	-0.305076	-0.265765
1.604	-0.74035	-0.527844	-0.458639	-0.468141	-0.452932	-0.450248	-0.413311	-0.364625	-0.341958	-0.327894	-0.303669	-0.26665
1.605	-0.73967	-0.526759	-0.456838	-0.467373	-0.447991	-0.449219	-0.413895	-0.364262	-0.340455	-0.327449	-0.303075	-0.267545
1.606	-0.739118	-0.526111	-0.455392	-0.466743	-0.443275	-0.448174	-0.41451	-0.363929	-0.338606	-0.327451	-0.303347	-0.268321
1.607	-0.738583	-0.525686	-0.454197	-0.466189	-0.438902	-0.447156	-0.415244	-0.363397	-0.336611	-0.327789	-0.304332	-0.268981
1.608	-0.738005	-0.525206	-0.453137	-0.465633	-0.434717	-0.446341	-0.416364	-0.362376	-0.334889	-0.328262	-0.305673	-0.269593
1.609	-0.737392	-0.524431	-0.452146	-0.465023	-0.430514	-0.445719	-0.418032	-0.360769	-0.33367	-0.328775	-0.307088	-0.270112
1.61	-0.736803	-0.523293	-0.451225	-0.464273	-0.426397	-0.445095	-0.420093	-0.358692	-0.332848	-0.32936	-0.308537	-0.270314
1.611	-0.736329	-0.521826	-0.450322	-0.463308	-0.422593	-0.444396	-0.422198	-0.356233	-0.332245	-0.329966	-0.309997	-0.269987
1.612	-0.73601	-0.520173	-0.449311	-0.462172	-0.419131	-0.443758	-0.423981	-0.353319	-0.331933	-0.33045	-0.311199	-0.269096
1.613	-0.735754	-0.51867	-0.448166	-0.460998	-0.415951	-0.443341	-0.425133	-0.350029	-0.332009	-0.330739	-0.311839	-0.267619
1.614	-0.735406	-0.517605	-0.447041	-0.459848	-0.413158	-0.44313	-0.425389	-0.346807	-0.332148	-0.330828	-0.312005	-0.265485
1.615	-0.734824	-0.516885	-0.446124	-0.458736	-0.410934	-0.442929	-0.424646	-0.344124	-0.331901	-0.330659	-0.312061	-0.262822
1.616	-0.73389	-0.516199	-0.445459	-0.457745	-0.409344	-0.442574	-0.42308	-0.342078	-0.331273	-0.330072	-0.312078	-0.260033
1.617	-0.732557	-0.515367	-0.444901	-0.456921	-0.408378	-0.4421	-0.421012	-0.340576	-0.330638	-0.328954	-0.311814	-0.257445
1.618	-0.730851	-0.514376	-0.444225	-0.45622	-0.407978	-0.441554	-0.41865	-0.339655	-0.330282	-0.327381	-0.311174	-0.25502
1.619	-0.728831	-0.51323	-0.443247	-0.455651	-0.407961	-0.440794	-0.416061	-0.339294	-0.330189	-0.32552	-0.310275	-0.252566
1.62	-0.726526	-0.51185	-0.442009	-0.455168	-0.408053	-0.439627	-0.413223	-0.339214	-0.330102	-0.323563	-0.309149	-0.250118
1.621	-0.723928	-0.510147	-0.440815	-0.454478	-0.408086	-0.438054	-0.409921	-0.339156	-0.329795	-0.321698	-0.307619	-0.247926
1.622	-0.721055	-0.508193	-0.439902	-0.453275	-0.408151	-0.436246	-0.40609	-0.339076	-0.329249	-0.320081	-0.305539	-0.24617
1.623	-0.717995	-0.506131	-0.439214	-0.451517	-0.408401	-0.434355	-0.402246	-0.339036	-0.328544	-0.31881	-0.302942	-0.244777
1.624	-0.714861	-0.504012	-0.438551	-0.449246	-0.408805	-0.43244	-0.399069	-0.339091	-0.327664	-0.317887	-0.299931	-0.243575
1.625	-0.711696	-0.50187	-0.437776	-0.446386	-0.409341	-0.430476	-0.396807	-0.339219	-0.326497	-0.317317	-0.296694	-0.242572
1.626	-0.70848	-0.499782	-0.436909	-0.44286	-0.410119	-0.428388	-0.395293	-0.339425	-0.325031	-0.317109	-0.293647	-0.24189
1.627	-0.705185	-0.497784	-0.435996	-0.438804	-0.411156	-0.42615	-0.39427	-0.339738	-0.323385	-0.316968	-0.2913	-0.241545
1.628	-0.701811	-0.49582	-0.434984	-0.434613	-0.412228	-0.423863	-0.393623	-0.340086	-0.321734	-0.316158	-0.289877	-0.241485
1.629	-0.698396	-0.493792	-0.433775	-0.430666	-0.412994	-0.421709	-0.393302	-0.340311	-0.320352	-0.314068	-0.289207	-0.24165
1.63	-0.694951	-0.491639	-0.432319	-0.427081	-0.413187	-0.41984	-0.393102	-0.340326	-0.319448	-0.310951	-0.288997	-0.241969
1.631	-0.691397	-0.489302	-0.430655	-0.423883	-0.412731	-0.4183	-0.392777	-0.340197	-0.318932	-0.307701	-0.289005	-0.242399
1.632	-0.687604	-0.486799	-0.428867	-0.42129	-0.411709	-0.417018	-0.392309	-0.339963	-0.318489	-0.30498	-0.289004	-0.242775
1.633	-0.683464	-0.484281	-0.42702	-0.419562	-0.410189	-0.415891	-0.391756	-0.339432	-0.317901	-0.30281	-0.288817	-0.242839
1.634	-0.678908	-0.481815	-0.42526	-0.418698	-0.408222	-0.414816	-0.390944	-0.33837	-0.317262	-0.300914	-0.288414	-0.242589
1.635	-0.673972	-0.479353	-0.423808	-0.418538	-0.405948	-0.413684	-0.389594	-0.336825	-0.316622	-0.299233	-0.287886	-0.242263
1.636	-0.668943	-0.476922	-0.422779	-0.418976	-0.403587	-0.412454	-0.387609	-0.335079	-0.315664	-0.297976	-0.287309	-0.241995
1.637	-0.664246	-0.474665	-0.422145	-0.419869	-0.401442	-0.411241	-0.385089	-0.333303	-0.314166	-0.297239	-0.286687	-0.241677
1.638	-0.660116	-0.472703	-0.421847	-0.421007	-0.399789	-0.410247	-0.382147	-0.331402	-0.312285	-0.296833	-0.286052	-0.241162
1.639	-0.656553	-0.471031	-0.421812	-0.422203	-0.39856	-0.409529	-0.378908	-0.329256	-0.310161	-0.296538	-0.285496	-0.240451
1.64	-0.653473	-0.46958	-0.421878	-0.423232	-0.39732	-0.408955	-0.375737	-0.326911	-0.307793	-0.296312	-0.285064	-0.23961
1.641	-0.650881	-0.468288	-0.421873	-0.423804	-0.395706	-0.408391	-0.373059	-0.324489	-0.305301	-0.296203	-0.284708	-0.238667
1.642	-0.648908	-0.467186	-0.421694	-0.423679	-0.39373	-0.407762	-0.370948	-0.322109	-0.303056	-0.296203	-0.284342	-0.237653
1.643	-0.647694	-0.466386	-0.421246	-0.42272	-0.39165	-0.406945	-0.369291	-0.319923	-0.30144	-0.296275	-0.283909	-0.236612
1.644	-0.64729	-0.465877	-0.420419	-0.420911	-0.38974	-0.405722	-0.368148	-0.318145	-0.300513	-0.296441	-0.283401	-0.235526
1.645	-0.647593	-0.465502	-0.419096	-0.418312	-0.388133	-0.403966	-0.367635	-0.316991	-0.300075	-0.29661	-0.282844	-0.234294
1.646	-0.648373	-0.465154	-0.417156	-0.415016	-0.386744	-0.401882	-0.367676	-0.316444	-0.29993	-0.296479	-0.282252	-0.232806
1.647	-0.64937	-0.464843	-0.414574	-0.411143	-0.385499	-0.399881	-0.367988	-0.316304	-0.299983	-0.295867	-0.281493	-0.231127
1.648	-0.650455	-0.46457	-0.411536	-0.406824	-0.384516	-0.398151	-0.368351	-0.316446	-0.300108	-0.294937	-0.280379	-0.229534
1.649	-0.651709	-0.464309	-0.408328	-0.402162	-0.383905	-0.396596	-0.368762	-0.316781	-0.300098	-0.293948	-0.279029	-0.228345
1.65	-0.653228	-0.464053	-0.405121	-0.397278	-0.383611	-0.39512	-0.369229	-0.317165	-0.299778	-0.292936	-0.277904	-0.2278
1.651	-0.654997	-0.463801	-0.402011	-0.392437	-0.383523	-0.393695	-0.369623	-0.317451	-0.299099	-0.291733	-0.277334	-0.228042
1.652	-0.656885	-0.463513	-0.399186	-0.387942	-0.38357	-0.39223	-0.369918	-0.317497	-0.298123	-0.290312	-0.277274	-0.229099
1.653	-0.658715	-0.463168	-0.396859	-0.383929	-0.383641	-0.390731	-0.370434	-0.31722	-0.296959	-0.288894	-0.277541	-0.230843
1.654	-0.660443	-0.46283	-0.395116	-0.380393	-0.383561	-0.389409	-0.371595	-0.316662	-0.29567	-0.287604	-0.277983	-0.233007
1.655	-0.66214	-0.462525	-0.393872	-0.377308	-0.38328	-0.388377	-0.373473	-0.31585	-0.294276	-0.286394	-0.278468	-0.235323
1.656	-0.663792	-0.462154	-0.392917	-0.374729	-0.382985	-0.387516	-0.375748	-0.314734	-0.292851	-0.28527	-0.2789	-0.237571
1.657	-0.665291	-0.461577	-0.392043	-0.372825	-0.382852	-0.386703	-0.378072	-0.313331	-0.291569	-0.284344	-0.279313	-0.239532
1.658	-0.666597	-0.460695	-0.39116	-0.371703	-0.382848	-0.385912	-0.380305	-0.311852	-0.290499	-0.283718	-0.279902	-0.241087
1.659	-0.667741	-0.459568	-0.390224	-0.371254	-0.382772	-0.385204	-0.382409	-0.310638	-0.289481	-0.283358	-0.280771	-0.242234
1.66	-0.668726	-0.458458	-0.389178	-0.371296	-0.382329	-0.384748	-0.384211	-0.309932	-0.288397	-0.283113	-0.281798	-0.242961
1.661	-0.669506	-0.45764	-0.387992	-0.371681	-0.381286	-0.384608	-0.385255	-0.309701	-0.287408	-0.282922	-0.282844	-0.243253
1.662	-0.670006	-0.457144	-0.386691	-0.372217	-0.379613	-0.384495	-0.385124	-0.309737	-0.286826	-0.282909	-0.283801	-0.243128
1.663	-0.670127	-0.456809	-0.385278	-0.372709	-0.37745	-0.384111	-0.383943	-0.309913	-0.286833	-0.283097	-0.284432	-0.242533
1.664	-0.66981	-0.456525	-0.383695	-0.372961	-0.374885	-0.383587	-0.382204	-0.310202	-0.287336	-0.283186	-0.284427	-0.241329
1.665	-0.668994	-0.456278	-0.381981	-0.37273	-0.371845	-0.383218	-0.38007	-0.310527	-0.288097	-0.282833	-0.283623	-0.239507
1.666	-0.667635	-0.456008	-0.380346	-0.37202	-0.368387	-0.383075	-0.377173	-0.310838	-0.288954	-0.28203	-0.282181	-0.237295
1.667	-0.665822	-0.455573	-0.378989	-0.371305	-0.364849	-0.383025	-0.37312	-0.311289	-0.289842	-0.280988	-0.280423	-0.234937
1.668	-0.663722	-0.45488	-0.378064	-0.371098	-0.361583	-0.382898	-0.368051	-0.312096	-0.290728	-0.279814	-0.278491	-0.232559
1.669	-0.661384	-0.453934	-0.377739	-0.371495	-0.358807	-0.382656	-0.362553	-0.313248	-0.291547	-0.278509	-0.276358	-0.230198
1.67	-0.658724	-0.452787	-0.377981	-0.372256	-0.356625	-0.382463	-0.357131	-0.314479	-0.292106	-0.277185	-0.274127	-0.227786
1.671	-0.655676	-0.451565	-0.378455	-0.373105	-0.354995	-0.382431	-0.35199	-0.31549	-0.292148	-0.276052	-0.271999	-0.225289
1.672	-0.652293	-0.450383	-0.3789	-0.373854	-0.353882	-0.382353	-0.347298	-0.316196	-0.291544	-0.275221	-0.26995	-0.222812
1.673	-0.648747	-0.449215	-0.379174	-0.374335	-0.353348	-0.381896	-0.343279	-0.316742	-0.290384	-0.274693	-0.267771	-0.220445
1.674	-0.645179	-0.44791	-0.379106	-0.374348	-0.353393	-0.380932	-0.340017	-0.317224	-0.28889	-0.274395	-0.265413	-0.218208
1.675	-0.641595	-0.446258	-0.378704	-0.373738	-0.353888	-0.379651	-0.337478	-0.317593	-0.287264	-0.274214	-0.263054	-0.216082
1.676	-0.63796	-0.444173	-0.378123	-0.372516	-0.354627	-0.378358	-0.335599	-0.317888	-0.285536	-0.274194	-0.260871	-0.214025
1.677	-0.634254	-0.441806	-0.377353	-0.370838	-0.355368	-0.377035	-0.334259	-0.318293	-0.283676	-0.274484	-0.258928	-0.212089
1.678	-0.630443	-0.43933	-0.376199	-0.368948	-0.355956	-0.375383	-0.333384	-0.318897	-0.281852	-0.275056	-0.257246	-0.210498
1.679	-0.6265	-0.436842	-0.374487	-0.367008	-0.356363	-0.373391	-0.332926	-0.319518	-0.280311	-0.275623	-0.255805	-0.209435
1.68	-0.62242	-0.434501	-0.372313	-0.364807	-0.356477	-0.371328	-0.332843	-0.319804	-0.27902	-0.2759	-0.254487	-0.208798
1.681	-0.618256	-0.432515	-0.370055	-0.362065	-0.356083	-0.369336	-0.33318	-0.319497	-0.27767	-0.275888	-0.253137	-0.208385
1.682	-0.614143	-0.431018	-0.368034	-0.358963	-0.355082	-0.367384	-0.333896	-0.318581	-0.276095	-0.275752	-0.251755	-0.208211
1.683	-0.610247	-0.429982	-0.3663	-0.355855	-0.35349	-0.365442	-0.33469	-0.317097	-0.274536	-0.275458	-0.250553	-0.208378
1.684	-0.60671	-0.429166	-0.364723	-0.352784	-0.351379	-0.36358	-0.335208	-0.314893	-0.273398	-0.274754	-0.249696	-0.208838
1.685	-0.603619	-0.428279	-0.36319	-0.349634	-0.3489	-0.361907	-0.335233	-0.311808	-0.272816	-0.273528	-0.24906	-0.209456
1.686	-0.600982	-0.427202	-0.361711	-0.346482	-0.346258	-0.36044	-0.334633	-0.308035	-0.272522	-0.271973	-0.24841	-0.210067
1.687	-0.598738	-0.425994	-0.360424	-0.343606	-0.343606	-0.359049	-0.333462	-0.304003	-0.272195	-0.270422	-0.247674	-0.210525
1.688	-0.596822	-0.424785	-0.359427	-0.341222	-0.341086	-0.357607	-0.33192	-0.299935	-0.271907	-0.269005	-0.246946	-0.210795
1.689	-0.595195	-0.423634	-0.358615	-0.339324	-0.338873	-0.356093	-0.329982	-0.295758	-0.271984	-0.267509	-0.246155	-0.210826
1.69	-0.593828	-0.422372	-0.357885	-0.337873	-0.337099	-0.354441	-0.327479	-0.291502	-0.272389	-0.265826	-0.244939	-0.210497
1.691	-0.592683	-0.420785	-0.357325	-0.336888	-0.335909	-0.352501	-0.324555	-0.287507	-0.272586	-0.264218	-0.243129	-0.209778
1.692	-0.591831	-0.418874	-0.357009	-0.336364	-0.335521	-0.35023	-0.321552	-0.284109	-0.272086	-0.262921	-0.241048	-0.20864
1.693	-0.591472	-0.416812	-0.356799	-0.336284	-0.336014	-0.347775	-0.318664	-0.28135	-0.270926	-0.261897	-0.239072	-0.206908
1.694	-0.591725	-0.414768	-0.356473	-0.336665	-0.337216	-0.345346	-0.315978	-0.279115	-0.269459	-0.261073	-0.237157	-0.204508
1.695	-0.592596	-0.412914	-0.35593	-0.337429	-0.338856	-0.343041	-0.313584	-0.277387	-0.267863	-0.260502	-0.235201	-0.201714
1.696	-0.594072	-0.411486	-0.355253	-0.33827	-0.340597	-0.340854	-0.31145	-0.276229	-0.266215	-0.26022	-0.233493	-0.198959
1.697	-0.596049	-0.410712	-0.354511	-0.338866	-0.34201	-0.338861	-0.309416	-0.275657	-0.264823	-0.260145	-0.23232	-0.196527
1.698	-0.598396	-0.410831	-0.353591	-0.339191	-0.342741	-0.337184	-0.307408	-0.275644	-0.264026	-0.260072	-0.231583	-0.194484
1.699	-0.601103	-0.412054	-0.352361	-0.339462	-0.342689	-0.335825	-0.305427	-0.276187	-0.263693	-0.2598	-0.231002	-0.192812
1.7	-0.604133	-0.414222	-0.350823	-0.339856	-0.342012	-0.334724	-0.303396	-0.27726	-0.263357	-0.259298	-0.230319	-0.191463
1.701	-0.607253	-0.416726	-0.349049	-0.34045	-0.34097	-0.333902	-0.301172	-0.278627	-0.262788	-0.258592	-0.229413	-0.190248
1.702	-0.610179	-0.418924	-0.347154	-0.341238	-0.33977	-0.333375	-0.298681	-0.279942	-0.262053	-0.257626	-0.228327	-0.188868
1.703	-0.612683	-0.420367	-0.345301	-0.342114	-0.338575	-0.333012	-0.296069	-0.281015	-0.261178	-0.256368	-0.227068	-0.187235
1.704	-0.614545	-0.420795	-0.343617	-0.342878	-0.337488	-0.332649	-0.29367	-0.281746	-0.260085	-0.254899	-0.225587	-0.185558
1.705	-0.615684	-0.420214	-0.342174	-0.343216	-0.336548	-0.332193	-0.291824	-0.28197	-0.258804	-0.253277	-0.223923	-0.18394
1.706	-0.616215	-0.418831	-0.340977	-0.342859	-0.335867	-0.331587	-0.290838	-0.281519	-0.257583	-0.251447	-0.222168	-0.18223
1.707	-0.616226	-0.416849	-0.339945	-0.341816	-0.335541	-0.330864	-0.290938	-0.280267	-0.256539	-0.249421	-0.220471	-0.180347
1.708	-0.615731	-0.414496	-0.338976	-0.340373	-0.335391	-0.330136	-0.292131	-0.278223	-0.255416	-0.247319	-0.219091	-0.178461
1.709	-0.614829	-0.41203	-0.338039	-0.338979	-0.335178	-0.329452	-0.294183	-0.275552	-0.254007	-0.245245	-0.218239	-0.17695
1.71	-0.613716	-0.409583	-0.337193	-0.337946	-0.334842	-0.328813	-0.296719	-0.272448	-0.252451	-0.243332	-0.217963	-0.176189
1.711	-0.612587	-0.407252	-0.336502	-0.337123	-0.334262	-0.328211	-0.299344	-0.269123	-0.250973	-0.241788	-0.218208	-0.176168
1.712	-0.611565	-0.405261	-0.335978	-0.336159	-0.333172	-0.327574	-0.301681	-0.265785	-0.249744	-0.240788	-0.218811	-0.17645
1.713	-0.610681	-0.403827	-0.335592	-0.334917	-0.331322	-0.326881	-0.303435	-0.262506	-0.248989	-0.2404	-0.219519	-0.176692
1.714	-0.60982	-0.402927	-0.335267	-0.333487	-0.328584	-0.326282	-0.304569	-0.259259	-0.248888	-0.240576	-0.220115	-0.176975
1.715	-0.608734	-0.40231	-0.334914	-0.331986	-0.325098	-0.325992	-0.305284	-0.25609	-0.249389	-0.241103	-0.220449	-0.177524
1.716	-0.60719	-0.401755	-0.334419	-0.330493	-0.321313	-0.326151	-0.305666	-0.25309	-0.250256	-0.241712	-0.220475	-0.178414
1.717	-0.605092	-0.401232	-0.333701	-0.329088	-0.317673	-0.326669	-0.305503	-0.250243	-0.251208	-0.242242	-0.220339	-0.179597
1.718	-0.602519	-0.400718	-0.332852	-0.327848	-0.314273	-0.327195	-0.304653	-0.247461	-0.252018	-0.24257	-0.220269	-0.181029
1.719	-0.599612	-0.400083	-0.332039	-0.326774	-0.311069	-0.327497	-0.303359	-0.244752	-0.252557	-0.242549	-0.220313	-0.182739
1.72	-0.59648	-0.399201	-0.3313	-0.325738	-0.308181	-0.327703	-0.301901	-0.242237	-0.25269	-0.242119	-0.220321	-0.184691
1.721	-0.593236	-0.398074	-0.330594	-0.324616	-0.305803	-0.327989	-0.300212	-0.239998	-0.25224	-0.241385	-0.220293	-0.186611
1.722	-0.590034	-0.396804	-0.329964	-0.323535	-0.304014	-0.328245	-0.298147	-0.238055	-0.251141	-0.240595	-0.220524	-0.188242
1.723	-0.587004	-0.395456	-0.329492	-0.322759	-0.302725	-0.328189	-0.295949	-0.236469	-0.24963	-0.239997	-0.221213	-0.189613
1.724	-0.584163	-0.394033	-0.329182	-0.322387	-0.3019	-0.327632	-0.294141	-0.235331	-0.248117	-0.239629	-0.22213	-0.190895
1.725	-0.581365	-0.392556	-0.329004	-0.32229	-0.301716	-0.326569	-0.292987	-0.234723	-0.246754	-0.239364	-0.222835	-0.192005
1.726	-0.578417	-0.39107	-0.328989	-0.322234	-0.302267	-0.325173	-0.292351	-0.234729	-0.245368	-0.239141	-0.223094	-0.192494
1.727	-0.575236	-0.389568	-0.329097	-0.322061	-0.303326	-0.323626	-0.291989	-0.235353	-0.244003	-0.239011	-0.223003	-0.191991
1.728	-0.57186	-0.387997	-0.329057	-0.321819	-0.304485	-0.322025	-0.29173	-0.236509	-0.2431	-0.238964	-0.222748	-0.190603
1.729	-0.568308	-0.38633	-0.328603	-0.321679	-0.305455	-0.320515	-0.291469	-0.238154	-0.242948	-0.238839	-0.222349	-0.188699
1.73	-0.564465	-0.384581	-0.327689	-0.32169	-0.306207	-0.31922	-0.291089	-0.24019	-0.243401	-0.238513	-0.221645	-0.186405
1.731	-0.560248	-0.382796	-0.326388	-0.321713	-0.306817	-0.31809	-0.290398	-0.24239	-0.244143	-0.23811	-0.220519	-0.183619
1.732	-0.555706	-0.381059	-0.324796	-0.321635	-0.307233	-0.317003	-0.289212	-0.244592	-0.244967	-0.237897	-0.219163	-0.180448
1.733	-0.550866	-0.379408	-0.323047	-0.321537	-0.307352	-0.315939	-0.287563	-0.246796	-0.245871	-0.23792	-0.21794	-0.177271
1.734	-0.545733	-0.377824	-0.321322	-0.321639	-0.307285	-0.314993	-0.285762	-0.248997	-0.246843	-0.237918	-0.216921	-0.174469
1.735	-0.5404	-0.376361	-0.319789	-0.322072	-0.307299	-0.314314	-0.284131	-0.250982	-0.24766	-0.237681	-0.215822	-0.172257
1.736	-0.535014	-0.375118	-0.318544	-0.322765	-0.307449	-0.313978	-0.282759	-0.252426	-0.248114	-0.237242	-0.214417	-0.170648
1.737	-0.529683	-0.374035	-0.317575	-0.323543	-0.30751	-0.313837	-0.281695	-0.253113	-0.248299	-0.236638	-0.212809	-0.169591
1.738	-0.524536	-0.372915	-0.316761	-0.324111	-0.307346	-0.313605	-0.281143	-0.252915	-0.248426	-0.235771	-0.211304	-0.169075
1.739	-0.519814	-0.371663	-0.315986	-0.32408	-0.307051	-0.313126	-0.281189	-0.251708	-0.248485	-0.23457	-0.210064	-0.169027
1.74	-0.51581	-0.37032	-0.315163	-0.323199	-0.306696	-0.312493	-0.281689	-0.249577	-0.24833	-0.233082	-0.208977	-0.16936
1.741	-0.512775	-0.368922	-0.314191	-0.321372	-0.306132	-0.31183	-0.282478	-0.246975	-0.24792	-0.231431	-0.207957	-0.17005
1.742	-0.510975	-0.367495	-0.313047	-0.318583	-0.305139	-0.311029	-0.283436	-0.244466	-0.24731	-0.229721	-0.207141	-0.171008
1.743	-0.51064	-0.366078	-0.311817	-0.315002	-0.30369	-0.30984	-0.284385	-0.242373	-0.246545	-0.22799	-0.206662	-0.171962
1.744	-0.511752	-0.364683	-0.310618	-0.310962	-0.301916	-0.308168	-0.285095	-0.240707	-0.245686	-0.226273	-0.206483	-0.172578
1.745	-0.514023	-0.363295	-0.309529	-0.306779	-0.299957	-0.306134	-0.285492	-0.239434	-0.244867	-0.224672	-0.206511	-0.172651
1.746	-0.517135	-0.36195	-0.30858	-0.302665	-0.29794	-0.30394	-0.285751	-0.238691	-0.244259	-0.223353	-0.206647	-0.172131
1.747	-0.520888	-0.360804	-0.30769	-0.298834	-0.295983	-0.301921	-0.286058	-0.238527	-0.243941	-0.222485	-0.2067	-0.171042
1.748	-0.525152	-0.360061	-0.306703	-0.295712	-0.294154	-0.300493	-0.286375	-0.238612	-0.243887	-0.222107	-0.206514	-0.169581
1.749	-0.529728	-0.359791	-0.305605	-0.293764	-0.292434	-0.29977	-0.286501	-0.238517	-0.244005	-0.222063	-0.206182	-0.16817
1.75	-0.534349	-0.359928	-0.304522	-0.293066	-0.290778	-0.299516	-0.286253	-0.238177	-0.244127	-0.222138	-0.206087	-0.167167
1.751	-0.538845	-0.360408	-0.303482	-0.293345	-0.289107	-0.299537	-0.285472	-0.237736	-0.244032	-0.222211	-0.206585	-0.166603
1.752	-0.543197	-0.36117	-0.302408	-0.294403	-0.287321	-0.299817	-0.284049	-0.237142	-0.243577	-0.222324	-0.207411	-0.16641
1.753	-0.547414	-0.36212	-0.301359	-0.296211	-0.285486	-0.300224	-0.282067	-0.23629	-0.242706	-0.222626	-0.207896	-0.166747
1.754	-0.55145	-0.363155	-0.300518	-0.298613	-0.283909	-0.300475	-0.279798	-0.235329	-0.241353	-0.223172	-0.207907	-0.167803
1.755	-0.55523	-0.364181	-0.299955	-0.301217	-0.282937	-0.300411	-0.277524	-0.234503	-0.239681	-0.223719	-0.207762	-0.169371
1.756	-0.558686	-0.365121	-0.299585	-0.303634	-0.2827	-0.300094	-0.275418	-0.233842	-0.238075	-0.223874	-0.207462	-0.170963
1.757	-0.561773	-0.365957	-0.299303	-0.30579	-0.283147	-0.299643	-0.273554	-0.233261	-0.236572	-0.223549	-0.2068	-0.172363
1.758	-0.56448	-0.366646	-0.299082	-0.30784	-0.284241	-0.299074	-0.271956	-0.232864	-0.234749	-0.223065	-0.205909	-0.173681
1.759	-0.56682	-0.367081	-0.29894	-0.309796	-0.285956	-0.298395	-0.270642	-0.232923	-0.232446	-0.222803	-0.20528	-0.174941
1.76	-0.568693	-0.367208	-0.298827	-0.311449	-0.288126	-0.297733	-0.269561	-0.233566	-0.230208	-0.222782	-0.20522	-0.175968
1.761	-0.569909	-0.367046	-0.298671	-0.312648	-0.290428	-0.297238	-0.26856	-0.234696	-0.228653	-0.222714	-0.205433	-0.176656
1.762	-0.570449	-0.36659	-0.298559	-0.313398	-0.292507	-0.296841	-0.267552	-0.236206	-0.22782	-0.222588	-0.205443	-0.177073
1.763	-0.570408	-0.365844	-0.298623	-0.313516	-0.294027	-0.296342	-0.266714	-0.23795	-0.227473	-0.222693	-0.20526	-0.177252
1.764	-0.569769	-0.364912	-0.298853	-0.312515	-0.294731	-0.29579	-0.266393	-0.239568	-0.227693	-0.222986	-0.205034	-0.177107
1.765	-0.568505	-0.36398	-0.299214	-0.310106	-0.294507	-0.295471	-0.266727	-0.240707	-0.228679	-0.223076	-0.20459	-0.176635
1.766	-0.566719	-0.363223	-0.299733	-0.306633	-0.293415	-0.295498	-0.267416	-0.24131	-0.230202	-0.222817	-0.203849	-0.175992
1.767	-0.564581	-0.362749	-0.300317	-0.302831	-0.291738	-0.295743	-0.268093	-0.241504	-0.2317	-0.222456	-0.203129	-0.175289
1.768	-0.562255	-0.36259	-0.300732	-0.299367	-0.289959	-0.296153	-0.268755	-0.241357	-0.232783	-0.22218	-0.202609	-0.174495
1.769	-0.559786	-0.362701	-0.300818	-0.296646	-0.288493	-0.296802	-0.269568	-0.240754	-0.233423	-0.221872	-0.202044	-0.173553
1.77	-0.557114	-0.362968	-0.300562	-0.294799	-0.287433	-0.297661	-0.270438	-0.239487	-0.233696	-0.221402	-0.20121	-0.172493
1.771	-0.55426	-0.363266	-0.300016	-0.293819	-0.286679	-0.298475	-0.271035	-0.237507	-0.233555	-0.220927	-0.200273	-0.171451
1.772	-0.551416	-0.363465	-0.299254	-0.293688	-0.28622	-0.298881	-0.271233	-0.234996	-0.232956	-0.220686	-0.199565	-0.170492
1.773	-0.548798	-0.363304	-0.298338	-0.29432	-0.286194	-0.298719	-0.271264	-0.232161	-0.231964	-0.220616	-0.199242	-0.16951
1.774	-0.54649	-0.362456	-0.297358	-0.295483	-0.286705	-0.298186	-0.271327	-0.229185	-0.230607	-0.220454	-0.199285	-0.168402
1.775	-0.544434	-0.360886	-0.296508	-0.296842	-0.287594	-0.297588	-0.271291	-0.226361	-0.228887	-0.220137	-0.199686	-0.167244
1.776	-0.542431	-0.358908	-0.295931	-0.298168	-0.288571	-0.297048	-0.270865	-0.22396	-0.227046	-0.219846	-0.200451	-0.166272
1.777	-0.54025	-0.356855	-0.295546	-0.299432	-0.289533	-0.296554	-0.269898	-0.22204	-0.225567	-0.219712	-0.201452	-0.165686
1.778	-0.537788	-0.354837	-0.295193	-0.300642	-0.290537	-0.296173	-0.268479	-0.220529	-0.224835	-0.219719	-0.202466	-0.165495
1.779	-0.535022	-0.352871	-0.294769	-0.301635	-0.291504	-0.296004	-0.266793	-0.21943	-0.224885	-0.219891	-0.203322	-0.165527
1.78	-0.531835	-0.351125	-0.294243	-0.302072	-0.29212	-0.296092	-0.265064	-0.218863	-0.225454	-0.220359	-0.203943	-0.165543
1.781	-0.528069	-0.34982	-0.293674	-0.301737	-0.292099	-0.296407	-0.263544	-0.218881	-0.226182	-0.22118	-0.204307	-0.165394
1.782	-0.523764	-0.348944	-0.29313	-0.300856	-0.291393	-0.296815	-0.262285	-0.219337	-0.226803	-0.222266	-0.204398	-0.165109
1.783	-0.51915	-0.348252	-0.292558	-0.299939	-0.290131	-0.297113	-0.261061	-0.220053	-0.227253	-0.223422	-0.204244	-0.16489
1.784	-0.514443	-0.347459	-0.291867	-0.299364	-0.288536	-0.297066	-0.25969	-0.220915	-0.227544	-0.22444	-0.203985	-0.165015
1.785	-0.509787	-0.346432	-0.291055	-0.299278	-0.286817	-0.296574	-0.258312	-0.221684	-0.227611	-0.225132	-0.203728	-0.165533
1.786	-0.505327	-0.345302	-0.290123	-0.299732	-0.28503	-0.295767	-0.257223	-0.222009	-0.227409	-0.225285	-0.203328	-0.166186
1.787	-0.501299	-0.344287	-0.289009	-0.300695	-0.283228	-0.294766	-0.256588	-0.221828	-0.226998	-0.224773	-0.202529	-0.166709
1.788	-0.497961	-0.343403	-0.287735	-0.301953	-0.281657	-0.293531	-0.256424	-0.221498	-0.226477	-0.223675	-0.201331	-0.167133
1.789	-0.49553	-0.342555	-0.286455	-0.303029	-0.280604	-0.291957	-0.256745	-0.221406	-0.225968	-0.222186	-0.200048	-0.16762
1.79	-0.494167	-0.341751	-0.285283	-0.303279	-0.280129	-0.290098	-0.25756	-0.221571	-0.225575	-0.220456	-0.199025	-0.167971
1.791	-0.493889	-0.341057	-0.284235	-0.302216	-0.280074	-0.288248	-0.258734	-0.221667	-0.225226	-0.218597	-0.198378	-0.167713
1.792	-0.494533	-0.340449	-0.283381	-0.29976	-0.280325	-0.286641	-0.260063	-0.221477	-0.224675	-0.216758	-0.197997	-0.166637
1.793	-0.495823	-0.339773	-0.282853	-0.296165	-0.281009	-0.285193	-0.261409	-0.221103	-0.223776	-0.2151	-0.1978	-0.164907
1.794	-0.497499	-0.338866	-0.282661	-0.291693	-0.282232	-0.283662	-0.262593	-0.220612	-0.222669	-0.213677	-0.197916	-0.162754
1.795	-0.499419	-0.337725	-0.282545	-0.286445	-0.283737	-0.281929	-0.26337	-0.219829	-0.221576	-0.212372	-0.198389	-0.1603
1.796	-0.501468	-0.336533	-0.282162	-0.28057	-0.285044	-0.280069	-0.263743	-0.218628	-0.220582	-0.211141	-0.198901	-0.157715
1.797	-0.503549	-0.335514	-0.281405	-0.274481	-0.285743	-0.278198	-0.264045	-0.217202	-0.21967	-0.210157	-0.19908	-0.155341
1.798	-0.505647	-0.334824	-0.280366	-0.268713	-0.285547	-0.276381	-0.264574	-0.215862	-0.218893	-0.209478	-0.198887	-0.15342
1.799	-0.507702	-0.334566	-0.279104	-0.263618	-0.284233	-0.27474	-0.265359	-0.214706	-0.218313	-0.208899	-0.198467	-0.151904
1.8	-0.50959	-0.334817	-0.277606	-0.259367	-0.281736	-0.273489	-0.266212	-0.213608	-0.217765	-0.208228	-0.19779	-0.150683
1.801	-0.511259	-0.335546	-0.275989	-0.25615	-0.278252	-0.272754	-0.266799	-0.212431	-0.216958	-0.207503	-0.196749	-0.149772
1.802	-0.512697	-0.33649	-0.27454	-0.254207	-0.27418	-0.272375	-0.266807	-0.21122	-0.215844	-0.206954	-0.195442	-0.149271
1.803	-0.51381	-0.337269	-0.273383	-0.253641	-0.269904	-0.272016	-0.266096	-0.210215	-0.214604	-0.206732	-0.19407	-0.149226
1.804	-0.514548	-0.337653	-0.272342	-0.254254	-0.26561	-0.271527	-0.264653	-0.209655	-0.213326	-0.206681	-0.192833	-0.149401
1.805	-0.51503	-0.337607	-0.271256	-0.255683	-0.26139	-0.270962	-0.262523	-0.209611	-0.211986	-0.206503	-0.191888	-0.149213
1.806	-0.515436	-0.337143	-0.270179	-0.257668	-0.257411	-0.270336	-0.259822	-0.210016	-0.210664	-0.206067	-0.191169	-0.148014
1.807	-0.515865	-0.336263	-0.269235	-0.259981	-0.253948	-0.269669	-0.25674	-0.210721	-0.209512	-0.205372	-0.190552	-0.145426
1.808	-0.51631	-0.335083	-0.268406	-0.262216	-0.251344	-0.269057	-0.253555	-0.211496	-0.208566	-0.204387	-0.190043	-0.141394
1.809	-0.516658	-0.333853	-0.267588	-0.263908	-0.249802	-0.268628	-0.250578	-0.212034	-0.207743	-0.203112	-0.189597	-0.136129
1.81	-0.516806	-0.332823	-0.266815	-0.264848	-0.249216	-0.268473	-0.247941	-0.212091	-0.207011	-0.201713	-0.189005	-0.130114
1.811	-0.516775	-0.332087	-0.266264	-0.265191	-0.249305	-0.268547	-0.245508	-0.211711	-0.206409	-0.200529	-0.188113	-0.124127
1.812	-0.5166	-0.331582	-0.266043	-0.265187	-0.249817	-0.268684	-0.243157	-0.211181	-0.205955	-0.199907	-0.187007	-0.11904
1.813	-0.516228	-0.33122	-0.266112	-0.264969	-0.250589	-0.268691	-0.241024	-0.210786	-0.205601	-0.199958	-0.185872	-0.115577
1.814	-0.515595	-0.330923	-0.266399	-0.264581	-0.251566	-0.268357	-0.239318	-0.210666	-0.205283	-0.200523	-0.184726	-0.114196
1.815	-0.514662	-0.330605	-0.266762	-0.264094	-0.252777	-0.267576	-0.238099	-0.210803	-0.205002	-0.201275	-0.183474	-0.115024
1.816	-0.51336	-0.33017	-0.266937	-0.263645	-0.254258	-0.266491	-0.237243	-0.211193	-0.20486	-0.201787	-0.182156	-0.117911
1.817	-0.511595	-0.329634	-0.266799	-0.263354	-0.256052	-0.265359	-0.236487	-0.211988	-0.204901	-0.201833	-0.180911	-0.122451
1.818	-0.509283	-0.329139	-0.266512	-0.263277	-0.258197	-0.264317	-0.235571	-0.213298	-0.204936	-0.201568	-0.179839	-0.128013
1.819	-0.506405	-0.328703	-0.266307	-0.263441	-0.260589	-0.263286	-0.234397	-0.214943	-0.204693	-0.2012	-0.179032	-0.13396
1.82	-0.503029	-0.328165	-0.266287	-0.263791	-0.262839	-0.262177	-0.233063	-0.21653	-0.20423	-0.200732	-0.17851	-0.139814
1.821	-0.499198	-0.327421	-0.266415	-0.264069	-0.264442	-0.261101	-0.231733	-0.217597	-0.203828	-0.20005	-0.178126	-0.145141
1.822	-0.49486	-0.326537	-0.266601	-0.263923	-0.265225	-0.260237	-0.230488	-0.217791	-0.203532	-0.199106	-0.177665	-0.149466
1.823	-0.490051	-0.325574	-0.266814	-0.263082	-0.265368	-0.259593	-0.229432	-0.217031	-0.203188	-0.198056	-0.177097	-0.152542
1.824	-0.485055	-0.324462	-0.26707	-0.261442	-0.265046	-0.258984	-0.228738	-0.21544	-0.202775	-0.19711	-0.176604	-0.154548
1.825	-0.480224	-0.323173	-0.26734	-0.259082	-0.264341	-0.25827	-0.228461	-0.213199	-0.202481	-0.196256	-0.176276	-0.15585
1.826	-0.475726	-0.321826	-0.267544	-0.256169	-0.263335	-0.257505	-0.228567	-0.210404	-0.202445	-0.195346	-0.176017	-0.156584
1.827	-0.471557	-0.320531	-0.267586	-0.252928	-0.262144	-0.256819	-0.22902	-0.207084	-0.202558	-0.194386	-0.175748	-0.156654
1.828	-0.467632	-0.31929	-0.267383	-0.249648	-0.260932	-0.256321	-0.229661	-0.203378	-0.202662	-0.19349	-0.175477	-0.155978
1.829	-0.463818	-0.318094	-0.266914	-0.246637	-0.259783	-0.256098	-0.230268	-0.199655	-0.202773	-0.192703	-0.175253	-0.154592
1.83	-0.459998	-0.31704	-0.266197	-0.244145	-0.258657	-0.256261	-0.230816	-0.19641	-0.202986	-0.192106	-0.175108	-0.152746
1.831	-0.456134	-0.316238	-0.265264	-0.242338	-0.25761	-0.25688	-0.231429	-0.194019	-0.203322	-0.191878	-0.174948	-0.150837
1.832	-0.452194	-0.315626	-0.264218	-0.241344	-0.256702	-0.257853	-0.232072	-0.192579	-0.203742	-0.192098	-0.174593	-0.149117
1.833	-0.448151	-0.315017	-0.263178	-0.241242	-0.255796	-0.25886	-0.232513	-0.191935	-0.204262	-0.192577	-0.174015	-0.147692
1.834	-0.444114	-0.314258	-0.262179	-0.241983	-0.2547	-0.259533	-0.232546	-0.191866	-0.204974	-0.192948	-0.173362	-0.146647
1.835	-0.440348	-0.313302	-0.261194	-0.243363	-0.253366	-0.259802	-0.232135	-0.192201	-0.205915	-0.192902	-0.172708	-0.145997
1.836	-0.437114	-0.312192	-0.260224	-0.245124	-0.251918	-0.259852	-0.23146	-0.192773	-0.207022	-0.19234	-0.17197	-0.145671
1.837	-0.434522	-0.311006	-0.259373	-0.24703	-0.250605	-0.259748	-0.230762	-0.193425	-0.208141	-0.19142	-0.171153	-0.145621
1.838	-0.432648	-0.309845	-0.258816	-0.248764	-0.249675	-0.259411	-0.230084	-0.193974	-0.209005	-0.190416	-0.170453	-0.145809
1.839	-0.43173	-0.308827	-0.258647	-0.249982	-0.24928	-0.258792	-0.229319	-0.194238	-0.209356	-0.189448	-0.170038	-0.146002
1.84	-0.432024	-0.308001	-0.258799	-0.250586	-0.249411	-0.257924	-0.228456	-0.194231	-0.209137	-0.188498	-0.169882	-0.145941
1.841	-0.433525	-0.307286	-0.259072	-0.250742	-0.249906	-0.256821	-0.227577	-0.194078	-0.208481	-0.187545	-0.169849	-0.145739
1.842	-0.435985	-0.306682	-0.259217	-0.250688	-0.250575	-0.255421	-0.226752	-0.193799	-0.207576	-0.186666	-0.16991	-0.145696
1.843	-0.439163	-0.306364	-0.258998	-0.250636	-0.251252	-0.253804	-0.226034	-0.193416	-0.206478	-0.186091	-0.170208	-0.14582
1.844	-0.443008	-0.306421	-0.258252	-0.250744	-0.251801	-0.252217	-0.22552	-0.193039	-0.205087	-0.185989	-0.170828	-0.145826
1.845	-0.447591	-0.306679	-0.256957	-0.251034	-0.252142	-0.250719	-0.225312	-0.19274	-0.203443	-0.186275	-0.171608	-0.145441
1.846	-0.452876	-0.306991	-0.255221	-0.251465	-0.252279	-0.249175	-0.22541	-0.19257	-0.201851	-0.186792	-0.172261	-0.144599
1.847	-0.45865	-0.307442	-0.253217	-0.252098	-0.252242	-0.247596	-0.225733	-0.192583	-0.200507	-0.18747	-0.172532	-0.143453
1.848	-0.464684	-0.308144	-0.251165	-0.253014	-0.251868	-0.246113	-0.226219	-0.192701	-0.199258	-0.188188	-0.172231	-0.142287
1.849	-0.470814	-0.309024	-0.249324	-0.254161	-0.25088	-0.244698	-0.226875	-0.192725	-0.19786	-0.188747	-0.171384	-0.141334
1.85	-0.476895	-0.309938	-0.247847	-0.25535	-0.249224	-0.243334	-0.227585	-0.192603	-0.196201	-0.189027	-0.170279	-0.140629
1.851	-0.482828	-0.310845	-0.246647	-0.256403	-0.247107	-0.242276	-0.227985	-0.192389	-0.194367	-0.188925	-0.16921	-0.140062
1.852	-0.488551	-0.311767	-0.245558	-0.257355	-0.244699	-0.241763	-0.227905	-0.191957	-0.192697	-0.188311	-0.16824	-0.139624
1.853	-0.493953	-0.312631	-0.244622	-0.258317	-0.242003	-0.241696	-0.227671	-0.191175	-0.191487	-0.187264	-0.167395	-0.139469
1.854	-0.49881	-0.313248	-0.244022	-0.259161	-0.239025	-0.241895	-0.227728	-0.190052	-0.190711	-0.186111	-0.166863	-0.139661
1.855	-0.502832	-0.313502	-0.243811	-0.259727	-0.235872	-0.242367	-0.228205	-0.188534	-0.190299	-0.185138	-0.166736	-0.140017
1.856	-0.505909	-0.313475	-0.24387	-0.26015	-0.232723	-0.243165	-0.228937	-0.186617	-0.190317	-0.184342	-0.166882	-0.140313
1.857	-0.508243	-0.31324	-0.244087	-0.260667	-0.22981	-0.244113	-0.229833	-0.184628	-0.190671	-0.183564	-0.167201	-0.140496
1.858	-0.510178	-0.312783	-0.244443	-0.261286	-0.227378	-0.244843	-0.231022	-0.182992	-0.191033	-0.182869	-0.167769	-0.140681
1.859	-0.511959	-0.312194	-0.244929	-0.261776	-0.225618	-0.24521	-0.232515	-0.181775	-0.191189	-0.182483	-0.168631	-0.141029
1.86	-0.513569	-0.31166	-0.245419	-0.261963	-0.224694	-0.245401	-0.233916	-0.180822	-0.191231	-0.182425	-0.169633	-0.141603
1.861	-0.514878	-0.311272	-0.245761	-0.261985	-0.224746	-0.245509	-0.234743	-0.180202	-0.191362	-0.182536	-0.170628	-0.142303
1.862	-0.515902	-0.310989	-0.245902	-0.261905	-0.225714	-0.24536	-0.234909	-0.180076	-0.19162	-0.182824	-0.17171	-0.142941
1.863	-0.516721	-0.310726	-0.245793	-0.261113	-0.227226	-0.244895	-0.234694	-0.180353	-0.191905	-0.183396	-0.172996	-0.143325
1.864	-0.5173	-0.310457	-0.245368	-0.258874	-0.22888	-0.244426	-0.234459	-0.18089	-0.192196	-0.184117	-0.17428	-0.143344
1.865	-0.517508	-0.310277	-0.244645	-0.255295	-0.230506	-0.244309	-0.234438	-0.181722	-0.19248	-0.184668	-0.175136	-0.14301
1.866	-0.517212	-0.310268	-0.243815	-0.251246	-0.23213	-0.244502	-0.234539	-0.182897	-0.192554	-0.184841	-0.1754	-0.142431
1.867	-0.516347	-0.310312	-0.243125	-0.247666	-0.233848	-0.24464	-0.234426	-0.184327	-0.192139	-0.184621	-0.175303	-0.141837
1.868	-0.514948	-0.310198	-0.242651	-0.245121	-0.235615	-0.244485	-0.233833	-0.185834	-0.191241	-0.184102	-0.175116	-0.141498
1.869	-0.513026	-0.309821	-0.242341	-0.243723	-0.237128	-0.244033	-0.232699	-0.187264	-0.1902	-0.183449	-0.174886	-0.141538
1.87	-0.510447	-0.309189	-0.242181	-0.24328	-0.238064	-0.243329	-0.231081	-0.188534	-0.189336	-0.182827	-0.174556	-0.141877
1.871	-0.507063	-0.308302	-0.242203	-0.243491	-0.238383	-0.242479	-0.229102	-0.189618	-0.188698	-0.182298	-0.17412	-0.142268
1.872	-0.502883	-0.30711	-0.242422	-0.244125	-0.238279	-0.241642	-0.226918	-0.190451	-0.188107	-0.181853	-0.17363	-0.14251
1.873	-0.498013	-0.305623	-0.242797	-0.245031	-0.237915	-0.240919	-0.224749	-0.190912	-0.187339	-0.181469	-0.173135	-0.142533
1.874	-0.492673	-0.303947	-0.24325	-0.246046	-0.237309	-0.240413	-0.222965	-0.191062	-0.186353	-0.181127	-0.172619	-0.14227
1.875	-0.48722	-0.302259	-0.243688	-0.247003	-0.236428	-0.240258	-0.221917	-0.191152	-0.185307	-0.180876	-0.172071	-0.141682
1.876	-0.48188	-0.300819	-0.244051	-0.247812	-0.235312	-0.240419	-0.221565	-0.191301	-0.18431	-0.180812	-0.171646	-0.140732
1.877	-0.476635	-0.299851	-0.244337	-0.248527	-0.234149	-0.240645	-0.221487	-0.191503	-0.183389	-0.180962	-0.171605	-0.13939
1.878	-0.471494	-0.299362	-0.244517	-0.249383	-0.233124	-0.240717	-0.221331	-0.191856	-0.182658	-0.181226	-0.172046	-0.137748
1.879	-0.466593	-0.299157	-0.244478	-0.250403	-0.232285	-0.240558	-0.221072	-0.192471	-0.182368	-0.181425	-0.172674	-0.135977
1.88	-0.461962	-0.299003	-0.244105	-0.251007	-0.231685	-0.240176	-0.220795	-0.193284	-0.182693	-0.181475	-0.173013	-0.134191
1.881	-0.457473	-0.298661	-0.243372	-0.250631	-0.231378	-0.239635	-0.220417	-0.194042	-0.183486	-0.18142	-0.172792	-0.132389
1.882	-0.453054	-0.297954	-0.24239	-0.249401	-0.231194	-0.238967	-0.219742	-0.194508	-0.184345	-0.181265	-0.171986	-0.130538
1.883	-0.448804	-0.296925	-0.241374	-0.247704	-0.230862	-0.23825	-0.218833	-0.194691	-0.184964	-0.180924	-0.170707	-0.128731
1.884	-0.444943	-0.295785	-0.240534	-0.24565	-0.230393	-0.237739	-0.218066	-0.19477	-0.185257	-0.180339	-0.169139	-0.127204
1.885	-0.441696	-0.294682	-0.240005	-0.243093	-0.23004	-0.237647	-0.217601	-0.194809	-0.185204	-0.179526	-0.16745	-0.126184
1.886	-0.43919	-0.293671	-0.23982	-0.239954	-0.229898	-0.237904	-0.217156	-0.194684	-0.184738	-0.178598	-0.165786	-0.125703
1.887	-0.437505	-0.292772	-0.239894	-0.236445	-0.229896	-0.2383	-0.216474	-0.19426	-0.183863	-0.177723	-0.164296	-0.125652
1.888	-0.436685	-0.291977	-0.240117	-0.232914	-0.230014	-0.238711	-0.215799	-0.193591	-0.182782	-0.176969	-0.163182	-0.125956
1.889	-0.436627	-0.291335	-0.240425	-0.229561	-0.230211	-0.239061	-0.215668	-0.192857	-0.181816	-0.176232	-0.162563	-0.126592
1.89	-0.437141	-0.290963	-0.240739	-0.226445	-0.230411	-0.23927	-0.216212	-0.192084	-0.18109	-0.175456	-0.162332	-0.127526
1.891	-0.438134	-0.29091	-0.240874	-0.223684	-0.230548	-0.23933	-0.216916	-0.191145	-0.180345	-0.174747	-0.162366	-0.128626
1.892	-0.43963	-0.291081	-0.240642	-0.221477	-0.230498	-0.239207	-0.217239	-0.189982	-0.17932	-0.174297	-0.162665	-0.129652
1.893	-0.44164	-0.291328	-0.240035	-0.219853	-0.230209	-0.238778	-0.217051	-0.188612	-0.178227	-0.174316	-0.16326	-0.130444
1.894	-0.444128	-0.291602	-0.23915	-0.218515	-0.229781	-0.237953	-0.21645	-0.187083	-0.17753	-0.174846	-0.164147	-0.131038
1.895	-0.44714	-0.291955	-0.238034	-0.217195	-0.229257	-0.236777	-0.215511	-0.18548	-0.177444	-0.175701	-0.165203	-0.131494
1.896	-0.45087	-0.292358	-0.236758	-0.215988	-0.228571	-0.235481	-0.214211	-0.183918	-0.177863	-0.176687	-0.166212	-0.131847
1.897	-0.455539	-0.292726	-0.235441	-0.215196	-0.227688	-0.23437	-0.21252	-0.182562	-0.178554	-0.177726	-0.166932	-0.132207
1.898	-0.46116	-0.293101	-0.234203	-0.215047	-0.226628	-0.233553	-0.210558	-0.181601	-0.17938	-0.178763	-0.167116	-0.132651
1.899	-0.467377	-0.293605	-0.233168	-0.215569	-0.225416	-0.232973	-0.208562	-0.181011	-0.180369	-0.179598	-0.166567	-0.133069
1.9	-0.473493	-0.294292	-0.232343	-0.216614	-0.224096	-0.232643	-0.206765	-0.180496	-0.181547	-0.179915	-0.165218	-0.133344
1.901	-0.478774	-0.295035	-0.231611	-0.218081	-0.222756	-0.232619	-0.205337	-0.1799	-0.18279	-0.179552	-0.163155	-0.13356
1.902	-0.482731	-0.295553	-0.230952	-0.220008	-0.22146	-0.232862	-0.204296	-0.179409	-0.183837	-0.178612	-0.160622	-0.133886
1.903	-0.485142	-0.295675	-0.230478	-0.222357	-0.220205	-0.233239	-0.20355	-0.179185	-0.184386	-0.177316	-0.158052	-0.134382
1.904	-0.486019	-0.29543	-0.230232	-0.22493	-0.218946	-0.233641	-0.203061	-0.179129	-0.184263	-0.175859	-0.155892	-0.134988
1.905	-0.485478	-0.294912	-0.230152	-0.227577	-0.217622	-0.233972	-0.202965	-0.179082	-0.183642	-0.174342	-0.154308	-0.135634
1.906	-0.483581	-0.294274	-0.230192	-0.23013	-0.216199	-0.234101	-0.203473	-0.179058	-0.182811	-0.172828	-0.153278	-0.13626
1.907	-0.480429	-0.293702	-0.230278	-0.232223	-0.214781	-0.23388	-0.204564	-0.179232	-0.181778	-0.171452	-0.15284	-0.136739
1.908	-0.476193	-0.293249	-0.23031	-0.233507	-0.213608	-0.233164	-0.205967	-0.17969	-0.180453	-0.170392	-0.153014	-0.136974
1.909	-0.471	-0.292848	-0.230274	-0.233869	-0.212874	-0.231933	-0.207478	-0.180188	-0.179063	-0.169756	-0.153676	-0.136981
1.91	-0.465014	-0.292529	-0.230162	-0.233323	-0.212651	-0.230297	-0.209047	-0.180364	-0.177967	-0.169466	-0.154655	-0.136808
1.911	-0.458589	-0.292462	-0.229891	-0.231927	-0.213015	-0.228377	-0.210616	-0.180107	-0.177206	-0.169294	-0.155773	-0.13646
1.912	-0.452235	-0.292736	-0.229363	-0.229764	-0.213918	-0.226339	-0.212149	-0.179428	-0.176587	-0.169094	-0.156777	-0.135855
1.913	-0.446444	-0.293249	-0.228553	-0.226909	-0.214984	-0.224375	-0.213684	-0.17827	-0.176064	-0.168831	-0.157395	-0.134946
1.914	-0.441487	-0.293848	-0.227569	-0.223572	-0.21586	-0.222571	-0.215162	-0.176724	-0.17572	-0.168527	-0.15746	-0.133821
1.915	-0.43735	-0.294436	-0.226577	-0.220155	-0.216582	-0.220908	-0.216335	-0.175085	-0.175526	-0.168265	-0.157027	-0.132578
1.916	-0.433905	-0.294966	-0.225685	-0.217	-0.217356	-0.219422	-0.216916	-0.173544	-0.175437	-0.168081	-0.156388	-0.131295
1.917	-0.431024	-0.295325	-0.224913	-0.214291	-0.218191	-0.218352	-0.216801	-0.172176	-0.17555	-0.167899	-0.155827	-0.130042
1.918	-0.42853	-0.29534	-0.224279	-0.212202	-0.218863	-0.217972	-0.2161	-0.171102	-0.175876	-0.167678	-0.155442	-0.128885
1.919	-0.426312	-0.294972	-0.223869	-0.210921	-0.219154	-0.218258	-0.214946	-0.170345	-0.176147	-0.167503	-0.155219	-0.127902
1.92	-0.424407	-0.294359	-0.223703	-0.210554	-0.218991	-0.218947	-0.213477	-0.169754	-0.176068	-0.167535	-0.155124	-0.127137
1.921	-0.422843	-0.293635	-0.223665	-0.211051	-0.21839	-0.219812	-0.211938	-0.169193	-0.175652	-0.16781	-0.155103	-0.126523
1.922	-0.421607	-0.292779	-0.22372	-0.212257	-0.217363	-0.220739	-0.210517	-0.168663	-0.175164	-0.168147	-0.155109	-0.125967
1.923	-0.420655	-0.291667	-0.223947	-0.21397	-0.21594	-0.22162	-0.209228	-0.168284	-0.174763	-0.168429	-0.155154	-0.125442
1.924	-0.419803	-0.290175	-0.2243	-0.215907	-0.214344	-0.222345	-0.208099	-0.168198	-0.174368	-0.168707	-0.155279	-0.124984
1.925	-0.418853	-0.288287	-0.224596	-0.217713	-0.212911	-0.222903	-0.207197	-0.168398	-0.173826	-0.168995	-0.15554	-0.124652
1.926	-0.417748	-0.286204	-0.22471	-0.219107	-0.211665	-0.223319	-0.206467	-0.168754	-0.173185	-0.169197	-0.156031	-0.124427
1.927	-0.416457	-0.28415	-0.22463	-0.220038	-0.210402	-0.223484	-0.205817	-0.169272	-0.172715	-0.169206	-0.156768	-0.124179
1.928	-0.414894	-0.282124	-0.224333	-0.22065	-0.209218	-0.223205	-0.205255	-0.170083	-0.172461	-0.168999	-0.157659	-0.12385
1.929	-0.412956	-0.280081	-0.223785	-0.221081	-0.208387	-0.222428	-0.204849	-0.17125	-0.172134	-0.16857	-0.158593	-0.123431
1.93	-0.410506	-0.278077	-0.223054	-0.221378	-0.207884	-0.221388	-0.204564	-0.172743	-0.171683	-0.167909	-0.159358	-0.122891
1.931	-0.407435	-0.276155	-0.22227	-0.221549	-0.207451	-0.22037	-0.204203	-0.174516	-0.171407	-0.167142	-0.159658	-0.122386
1.932	-0.403807	-0.274284	-0.221515	-0.221595	-0.206945	-0.219413	-0.203631	-0.176554	-0.171416	-0.166434	-0.159317	-0.122213
1.933	-0.399782	-0.272407	-0.220812	-0.221537	-0.206403	-0.218492	-0.202932	-0.178738	-0.17151	-0.165842	-0.15839	-0.122419
1.934	-0.395506	-0.270519	-0.220143	-0.221409	-0.205897	-0.217711	-0.202237	-0.18068	-0.171573	-0.165356	-0.157098	-0.122697
1.935	-0.391205	-0.268647	-0.219478	-0.221218	-0.205374	-0.21713	-0.201611	-0.181863	-0.171696	-0.16489	-0.155628	-0.122725
1.936	-0.387111	-0.266871	-0.218837	-0.220916	-0.204733	-0.216596	-0.201206	-0.181954	-0.171936	-0.164394	-0.154017	-0.122541
1.937	-0.383328	-0.265392	-0.218313	-0.220309	-0.204028	-0.215871	-0.201218	-0.180947	-0.172144	-0.164046	-0.152292	-0.122415
1.938	-0.380038	-0.264372	-0.217933	-0.219093	-0.203361	-0.214913	-0.201619	-0.179037	-0.172089	-0.164026	-0.150661	-0.122377
1.939	-0.377615	-0.263737	-0.217589	-0.217137	-0.202678	-0.213841	-0.202134	-0.176397	-0.171748	-0.164165	-0.149354	-0.122202
1.94	-0.376352	-0.263306	-0.217104	-0.214669	-0.201914	-0.212657	-0.202478	-0.173215	-0.171317	-0.164249	-0.148403	-0.121869
1.941	-0.376295	-0.262985	-0.216334	-0.212069	-0.201221	-0.211243	-0.202464	-0.169858	-0.170941	-0.164396	-0.147811	-0.121605
1.942	-0.377423	-0.262779	-0.21534	-0.209624	-0.200881	-0.209618	-0.201972	-0.166761	-0.170665	-0.164756	-0.147736	-0.121479
1.943	-0.37979	-0.262753	-0.214328	-0.207538	-0.20101	-0.20804	-0.200899	-0.164134	-0.170592	-0.165234	-0.14828	-0.121347
1.944	-0.383427	-0.262934	-0.213423	-0.205954	-0.201481	-0.206661	-0.199213	-0.161929	-0.170894	-0.165711	-0.149293	-0.121233
1.945	-0.388215	-0.263255	-0.212679	-0.20484	-0.202073	-0.205241	-0.197044	-0.160019	-0.171641	-0.166106	-0.150517	-0.121339
1.946	-0.393892	-0.263684	-0.212118	-0.204008	-0.202553	-0.203476	-0.194677	-0.158267	-0.172619	-0.166231	-0.151738	-0.12168
1.947	-0.400196	-0.264272	-0.211648	-0.203393	-0.202744	-0.201355	-0.192417	-0.156665	-0.173464	-0.165885	-0.152721	-0.122104
1.948	-0.406967	-0.265037	-0.211073	-0.203227	-0.202609	-0.199101	-0.190477	-0.155466	-0.173977	-0.165026	-0.15313	-0.122508
1.949	-0.414118	-0.265961	-0.210236	-0.20376	-0.202219	-0.197	-0.188917	-0.154898	-0.17409	-0.163787	-0.152667	-0.122824
1.95	-0.421465	-0.267096	-0.20914	-0.204953	-0.201554	-0.195342	-0.187502	-0.154864	-0.173719	-0.162341	-0.151227	-0.122949
1.951	-0.428735	-0.268441	-0.207963	-0.206514	-0.200498	-0.194339	-0.185866	-0.155051	-0.172858	-0.160768	-0.14889	-0.122804
1.952	-0.435737	-0.269786	-0.206943	-0.208093	-0.199105	-0.193999	-0.184052	-0.155224	-0.171623	-0.159178	-0.145849	-0.122412
1.953	-0.442308	-0.270924	-0.206182	-0.209416	-0.197628	-0.194146	-0.182609	-0.155411	-0.170022	-0.157828	-0.14244	-0.12181
1.954	-0.448187	-0.271886	-0.205618	-0.210308	-0.196246	-0.194698	-0.182098	-0.155744	-0.167896	-0.156883	-0.139057	-0.120982
1.955	-0.453043	-0.272778	-0.205176	-0.210686	-0.19504	-0.195782	-0.182561	-0.15619	-0.165238	-0.156255	-0.135918	-0.11998
1.956	-0.45662	-0.273545	-0.204918	-0.21058	-0.194128	-0.197439	-0.183499	-0.156652	-0.162289	-0.155875	-0.133153	-0.118952
1.957	-0.458991	-0.274071	-0.204997	-0.210146	-0.19361	-0.199394	-0.184473	-0.157145	-0.159373	-0.155912	-0.131043	-0.118148
1.958	-0.460589	-0.274252	-0.20541	-0.209588	-0.19346	-0.201256	-0.18553	-0.157627	-0.156861	-0.156552	-0.129954	-0.117769
1.959	-0.461824	-0.274003	-0.205941	-0.209117	-0.193589	-0.20281	-0.186865	-0.157808	-0.155134	-0.1577	-0.13005	-0.117619
1.96	-0.462843	-0.273372	-0.206381	-0.208844	-0.193965	-0.204062	-0.188413	-0.157392	-0.15439	-0.15904	-0.131108	-0.1173
1.961	-0.463608	-0.272491	-0.206643	-0.208703	-0.194629	-0.20505	-0.190042	-0.156421	-0.154547	-0.160369	-0.132688	-0.116643
1.962	-0.464067	-0.271443	-0.206681	-0.208579	-0.195628	-0.205783	-0.191741	-0.155163	-0.155286	-0.161686	-0.134463	-0.11573
1.963	-0.464279	-0.270317	-0.206424	-0.20836	-0.196924	-0.206293	-0.193395	-0.153739	-0.15625	-0.162969	-0.136195	-0.114706
1.964	-0.464361	-0.269261	-0.205808	-0.207919	-0.19836	-0.206613	-0.194664	-0.152137	-0.15735	-0.16406	-0.137619	-0.113667
1.965	-0.464371	-0.268383	-0.204876	-0.207228	-0.199781	-0.206824	-0.195153	-0.150436	-0.158713	-0.164863	-0.138527	-0.112738
1.966	-0.464263	-0.267638	-0.203821	-0.2064	-0.201163	-0.207045	-0.194631	-0.148862	-0.160318	-0.16553	-0.138873	-0.112123
1.967	-0.463902	-0.266859	-0.202917	-0.205522	-0.20251	-0.207289	-0.193153	-0.147759	-0.161877	-0.166275	-0.138769	-0.111934
1.968	-0.463137	-0.265879	-0.202436	-0.204522	-0.203733	-0.207477	-0.191078	-0.147459	-0.163018	-0.16711	-0.138353	-0.112105
1.969	-0.461798	-0.264719	-0.202473	-0.203348	-0.204734	-0.207602	-0.188888	-0.147963	-0.163508	-0.167885	-0.137654	-0.112455
1.97	-0.459654	-0.263519	-0.202856	-0.202161	-0.205449	-0.207674	-0.186927	-0.148885	-0.163319	-0.1685	-0.136679	-0.112783
1.971	-0.456553	-0.262305	-0.203412	-0.201237	-0.205806	-0.207564	-0.185328	-0.149808	-0.162527	-0.16897	-0.135552	-0.112964
1.972	-0.452442	-0.261028	-0.204144	-0.200759	-0.205711	-0.207094	-0.184085	-0.150562	-0.161252	-0.169364	-0.134512	-0.112939
1.973	-0.447261	-0.25969	-0.205028	-0.200665	-0.205142	-0.206208	-0.183228	-0.151198	-0.159743	-0.169704	-0.133757	-0.112644
1.974	-0.441032	-0.258371	-0.205928	-0.200724	-0.204256	-0.205004	-0.182887	-0.151829	-0.158285	-0.169982	-0.133265	-0.112036
1.975	-0.433936	-0.257231	-0.20677	-0.200797	-0.203185	-0.203595	-0.183092	-0.152411	-0.157055	-0.170234	-0.13297	-0.111154
1.976	-0.426315	-0.256375	-0.207628	-0.200796	-0.201877	-0.202015	-0.183728	-0.152751	-0.156175	-0.170421	-0.132962	-0.110138
1.977	-0.418619	-0.255742	-0.208542	-0.200595	-0.200328	-0.200302	-0.18471	-0.152732	-0.15568	-0.170381	-0.133372	-0.10907
1.978	-0.411134	-0.255202	-0.209387	-0.200137	-0.198678	-0.198518	-0.185971	-0.152401	-0.15547	-0.170012	-0.134163	-0.107868
1.979	-0.403959	-0.254719	-0.209959	-0.199444	-0.197036	-0.196706	-0.187291	-0.151897	-0.155487	-0.16936	-0.135108	-0.106437
1.98	-0.397263	-0.254326	-0.210118	-0.198543	-0.195393	-0.194985	-0.188339	-0.15141	-0.155816	-0.168558	-0.135951	-0.10484
1.981	-0.391261	-0.253919	-0.20985	-0.197557	-0.193738	-0.193446	-0.188865	-0.151153	-0.156516	-0.167701	-0.136537	-0.103353
1.982	-0.386043	-0.253258	-0.209167	-0.196672	-0.192194	-0.192029	-0.188814	-0.151253	-0.157471	-0.166761	-0.136793	-0.102288
1.983	-0.381562	-0.252225	-0.208079	-0.195953	-0.190966	-0.190756	-0.188257	-0.151646	-0.158426	-0.165643	-0.136693	-0.101726
1.984	-0.377691	-0.250948	-0.206725	-0.19536	-0.190185	-0.18984	-0.187279	-0.152113	-0.159101	-0.1643	-0.136247	-0.101552
1.985	-0.374342	-0.249671	-0.205351	-0.19485	-0.18986	-0.189383	-0.185948	-0.1524	-0.159229	-0.162791	-0.135464	-0.101639
1.986	-0.371542	-0.248536	-0.204199	-0.194365	-0.190001	-0.189247	-0.184431	-0.152393	-0.158533	-0.161262	-0.134442	-0.101974
1.987	-0.369307	-0.24756	-0.203381	-0.193846	-0.190678	-0.189235	-0.182983	-0.152143	-0.15688	-0.159764	-0.133492	-0.102549
1.988	-0.36757	-0.246766	-0.202802	-0.193263	-0.191834	-0.189219	-0.181684	-0.151669	-0.15456	-0.158107	-0.132959	-0.103163
1.989	-0.36628	-0.246242	-0.202331	-0.1927	-0.193224	-0.18907	-0.180463	-0.150951	-0.152214	-0.15609	-0.132908	-0.103627
1.99	-0.365497	-0.246065	-0.201967	-0.192334	-0.194565	-0.188635	-0.179319	-0.150073	-0.150227	-0.153787	-0.133169	-0.103994
1.991	-0.365329	-0.246177	-0.201712	-0.192204	-0.195639	-0.187903	-0.178342	-0.149228	-0.148357	-0.1515	-0.133546	-0.104389
1.992	-0.365831	-0.24642	-0.201469	-0.192198	-0.196318	-0.187125	-0.17765	-0.148617	-0.146337	-0.149546	-0.13389	-0.10481
1.993	-0.367048	-0.24664	-0.201106	-0.192304	-0.196497	-0.186642	-0.177337	-0.148267	-0.144399	-0.148095	-0.134072	-0.105198
1.994	-0.369107	-0.246747	-0.20051	-0.192608	-0.196112	-0.186584	-0.177434	-0.14797	-0.142841	-0.147134	-0.133939	-0.105643
1.995	-0.372153	-0.246794	-0.199671	-0.193144	-0.195285	-0.186878	-0.177907	-0.147622	-0.141654	-0.146602	-0.133517	-0.106283
1.996	-0.376139	-0.246887	-0.198746	-0.193931	-0.194274	-0.187422	-0.178706	-0.14739	-0.140771	-0.14648	-0.133114	-0.106978
1.997	-0.380791	-0.247032	-0.197936	-0.195108	-0.193301	-0.188173	-0.179837	-0.147381	-0.140283	-0.146641	-0.132975	-0.107441
1.998	-0.385792	-0.247184	-0.197308	-0.196975	-0.192469	-0.189108	-0.181285	-0.147516	-0.14027	-0.146838	-0.133035	-0.107703
[truncated: 1,001 more rows]

## Sheet: Suppl_fig1G_Mg titration
MgCl2 (mM)	ATPase activity(µmol Pi/mg/min)
0.1	1.0683	-0.2774	-0.1839
0.25	1.5057	1.7889	1.2462
0.5	2.2945	2.599	2.6412
1	5.0622	4.6196	3.9954
2	6.6272	6.5718	7.5597
5	7.545	7.9253	6.8803
25	7.1529	6.5626	6.7813

## Sheet: Suppl_fig1H_K_contaminatio
	mean	SD	N
MQ water	48.5194	0.30055	3
HEPES	65.7073	2.59933	3
TES	202.562	0.964943	3
LDH	97.6248	0.885716	3
PK	284.878	3.87168	3
NADH	94.1098	0.986898	3
PEP	0	0	3
ATP	1884.01	7.60542	3
MgCl2	2519.43	186.181	3
Rb2SO4	14.3602	9.24535	3
0.1mM KCl	4431.76	13.1516	3
