# Supplementary material for: Conduction pathway for potassium through the Escherichia coli pump KdpFABC
Source: eLife. 2025 Nov 19;14:RP107397. doi: 10.7554/eLife.107397 (PMC12629597; doi:10.7554/eLife.107397)
Supplement: Figure 1—figure supplement 2—source data 1. [file elife-107397-fig1-figsupp2-data1.xlsx]

## Sheet: Fourier Shell Coefficient
wave_number	fsc_nomask	fsc_loosemask	fsc_tightmask	fsc_noisesub_raw	fsc_noisesub_true	fsc_noisesub
0.5	1	1	1	1	nan	1
1.5	0.999707	0.999999	1	1	0	1
2.5	0.999933	0.999997	1	1	0.571429	1
3.5	0.99984	0.999993	0.999999	0.999999	0.181818	0.999999
4.5	0.999694	0.999988	0.999999	0.999999	-0.357143	0.999999
5.5	0.999566	0.999986	0.999998	0.999998	0.103448	0.999998
6.5	0.999266	0.999966	0.999995	0.999995	-0.074074	0.999995
7.5	0.999197	0.99995	0.999992	0.999991	0.088435	0.999992
8.5	0.999042	0.999937	0.999987	0.999988	-0.039216	0.999987
9.5	0.998839	0.999915	0.999982	0.999982	0.01634	0.999982
10.5	0.998823	0.999888	0.999974	0.999975	-0.009412	0.999974
11.5	0.998665	0.999851	0.99997	0.999969	0.019231	0.99997
12.5	0.997797	0.999769	0.999957	0.999957	-0.001391	0.999957
13.5	0.996858	0.999731	0.999943	0.999941	0.031472	0.999943
14.5	0.99629	0.999711	0.999929	0.999927	0.017227	0.999929
15.5	0.994985	0.999634	0.999913	0.999912	0.014237	0.999913
16.5	0.992787	0.999506	0.999887	0.999888	-0.005325	0.999887
17.5	0.989536	0.999278	0.999852	0.999852	0.001614	0.999852
18.5	0.986965	0.998994	0.9998	0.999802	-0.01084	0.9998
19.5	0.986016	0.998819	0.999742	0.999743	-0.001853	0.999742
20.5	0.985474	0.998691	0.999725	0.999726	-0.001739	0.999725
21.5	0.982657	0.998561	0.999715	0.999713	0.007681	0.999715
22.5	0.979917	0.998334	0.999699	0.999695	0.012329	0.999699
23.5	0.978473	0.998205	0.999691	0.999689	0.006324	0.999691
24.5	0.97521	0.998097	0.999658	0.999658	0.000523	0.999658
25.5	0.974712	0.998003	0.999616	0.999615	0.00031	0.999616
26.5	0.974846	0.997863	0.999608	0.999609	-0.003813	0.999608
27.5	0.97579	0.997907	0.999591	0.999594	-0.007482	0.999591
28.5	0.975164	0.997889	0.999573	0.999577	-0.010157	0.999573
29.5	0.974921	0.997811	0.999548	0.999549	-0.001585	0.999548
30.5	0.975738	0.997882	0.999521	0.999523	-0.002871	0.999521
31.5	0.977431	0.997903	0.999499	0.999501	-0.004063	0.999499
32.5	0.977306	0.997821	0.999476	0.999474	0.004191	0.999476
33.5	0.976667	0.997793	0.999451	0.999447	0.00712	0.999451
34.5	0.975672	0.997691	0.999401	0.9994	0.000894	0.999401
35.5	0.973717	0.997524	0.999331	0.999326	0.007513	0.999331
36.5	0.971413	0.997187	0.999227	0.999231	-0.005272	0.999227
37.5	0.968198	0.996803	0.999139	0.99914	-0.001247	0.999139
38.5	0.962032	0.996255	0.999018	0.999018	-0.000668	0.999018
39.5	0.956927	0.995694	0.998906	0.998911	-0.004654	0.998906
40.5	0.949589	0.994835	0.998743	0.99875	-0.005533	0.998743
41.5	0.945331	0.9942	0.998607	0.998611	-0.002489	0.998607
42.5	0.942038	0.993982	0.998497	0.998502	-0.002904	0.998497
43.5	0.937431	0.993609	0.998365	0.998368	-0.001789	0.998365
44.5	0.930658	0.992826	0.998196	0.998191	0.002767	0.998196
45.5	0.921509	0.991524	0.997981	0.997975	0.002797	0.997981
46.5	0.911188	0.99007	0.997686	0.99768	0.002338	0.997686
47.5	0.903633	0.98893	0.99738	0.997382	-0.000843	0.99738
48.5	0.892146	0.987553	0.997105	0.997119	-0.004883	0.997105
49.5	0.878266	0.985886	0.996826	0.996835	-0.002957	0.996826
50.5	0.871775	0.984532	0.996523	0.996528	-0.001373	0.996523
51.5	0.863714	0.983483	0.996211	0.996214	-0.001023	0.996211
52.5	0.856055	0.982635	0.995876	0.995877	-0.000202	0.995876
53.5	0.852357	0.981754	0.995508	0.995523	-0.003328	0.995508
54.5	0.852289	0.98086	0.995194	0.995206	-0.002375	0.995194
55.5	0.850119	0.980661	0.994936	0.994945	-0.00171	0.994936
56.5	0.849782	0.980501	0.994951	0.994944	0.001462	0.994951
57.5	0.851565	0.98018	0.99505	0.99505	-6e-05	0.99505
58.5	0.857929	0.980205	0.995076	0.995073	0.000738	0.995076
59.5	0.860545	0.980637	0.995042	0.995042	0.000144	0.995042
60.5	0.869651	0.981662	0.9951	0.995119	-0.003822	0.9951
61.5	0.878749	0.982993	0.99535	0.995371	-0.00452	0.99535
62.5	0.8859	0.984473	0.995645	0.995666	-0.004841	0.995645
63.5	0.891188	0.985027	0.995789	0.995809	-0.004907	0.995789
64.5	0.898837	0.985311	0.995925	0.995931	-0.001494	0.995925
65.5	0.902526	0.985425	0.995924	0.99592	0.000993	0.995924
66.5	0.910953	0.986457	0.996052	0.996045	0.001673	0.996052
67.5	0.917703	0.987615	0.996252	0.996252	-0.000175	0.996252
68.5	0.924362	0.988202	0.996392	0.996397	-0.001506	0.996392
69.5	0.926443	0.98834	0.996393	0.996392	0.000248	0.996393
70.5	0.926705	0.988304	0.996289	0.996293	-0.000949	0.996289
71.5	0.925894	0.988169	0.996121	0.996116	0.001396	0.996121
72.5	0.923047	0.987557	0.995869	0.995868	4.3e-05	0.995869
73.5	0.921008	0.986945	0.995633	0.995634	-0.000246	0.995633
74.5	0.917839	0.986319	0.995314	0.995313	0.000127	0.995314
75.5	0.913943	0.985722	0.994978	0.994982	-0.000796	0.994978
76.5	0.9089	0.984681	0.994594	0.994591	0.000474	0.994594
77.5	0.904433	0.983507	0.994295	0.994285	0.001773	0.994295
78.5	0.899222	0.982621	0.993951	0.99396	-0.001589	0.993951
79.5	0.896227	0.981879	0.993655	0.993664	-0.001439	0.993655
80.5	0.888859	0.98066	0.993336	0.99335	-0.002079	0.993336
81.5	0.880909	0.9793	0.992941	0.992946	-0.000744	0.992941
82.5	0.869089	0.977048	0.99237	0.992378	-0.001048	0.99237
83.5	0.858081	0.974631	0.991721	0.991726	-0.000576	0.991721
84.5	0.84416	0.971901	0.990839	0.99083	0.001033	0.990839
85.5	0.833875	0.969221	0.989785	0.989782	0.000321	0.989785
86.5	0.820676	0.966667	0.988755	0.988764	-0.000769	0.988755
87.5	0.809147	0.964014	0.987835	0.987867	-0.002658	0.987835
88.5	0.798196	0.961056	0.986915	0.98697	-0.004204	0.986915
89.5	0.786388	0.95807	0.986051	0.986102	-0.003701	0.986051
90.5	0.774139	0.955253	0.985084	0.985132	-0.003211	0.985084
91.5	0.759992	0.95223	0.983907	0.983952	-0.002797	0.983907
92.5	0.74213	0.948219	0.98276	0.982802	-0.002457	0.98276
93.5	0.723529	0.94377	0.981337	0.981378	-0.002215	0.981337
94.5	0.702582	0.938929	0.979467	0.979505	-0.001841	0.979467
95.5	0.680703	0.933091	0.977271	0.977331	-0.002635	0.977271
96.5	0.655247	0.925975	0.975188	0.975241	-0.002157	0.975188
97.5	0.632973	0.919842	0.973386	0.973479	-0.003499	0.973386
98.5	0.617196	0.914245	0.971394	0.971502	-0.003802	0.971394
99.5	0.597581	0.907308	0.969373	0.96952	-0.004828	0.969373
100.5	0.568159	0.897264	0.966673	0.966881	-0.006265	0.966673
101.5	0.545335	0.88836	0.963248	0.963497	-0.006824	0.963248
102.5	0.523291	0.879045	0.959622	0.959924	-0.007524	0.959622
103.5	0.49577	0.868666	0.956748	0.957122	-0.008735	0.956748
104.5	0.477171	0.860055	0.95401	0.954411	-0.008794	0.95401
105.5	0.456552	0.853543	0.951343	0.951705	-0.007485	0.951343
106.5	0.441353	0.843687	0.947703	0.947999	-0.005698	0.947703
107.5	0.419186	0.830839	0.943497	0.943846	-0.006215	0.943497
108.5	0.390739	0.816898	0.939031	0.939592	-0.009291	0.939031
109.5	0.368097	0.802963	0.934749	0.935364	-0.009513	0.934749
110.5	0.34291	0.790372	0.93012	0.930699	-0.008363	0.93012
111.5	0.326078	0.777211	0.924523	0.925068	-0.007278	0.924523
112.5	0.308402	0.759855	0.918146	0.918929	-0.009669	0.918146
113.5	0.287159	0.74392	0.912886	0.914401	-0.017707	0.912886
114.5	0.27808	0.732462	0.907245	0.909504	-0.024964	0.907245
115.5	0.260165	0.71929	0.901903	0.904702	-0.029373	0.901903
116.5	0.242317	0.699382	0.896422	0.899239	-0.027953	0.896422
117.5	0.226235	0.680076	0.888746	0.890836	-0.019149	0.888746
118.5	0.211704	0.664528	0.880523	0.879494	0.008535	0.880523
119.5	0.195242	0.642292	0.87071	0.861876	0.063951	0.87071
120.5	0.178615	0.61615	0.860356	0.832852	0.164546	0.860356
121.5	0.171596	0.59494	0.84839	0.779806	0.311472	0.84839
122.5	0.150235	0.577608	0.837013	0.68045	0.489947	0.837013
123.5	0.14248	0.553546	0.824118	0.518209	0.634941	0.634941
124.5	0.128638	0.525332	0.810807	0.367018	0.701109	0.701109
125.5	0.114002	0.491844	0.796997	0.305315	0.707776	0.707776
126.5	0.103727	0.466751	0.782755	0.286694	0.695439	0.695439
127.5	0.098594	0.452155	0.767909	0.266279	0.68368	0.68368
128.5	0.095214	0.434759	0.752232	0.248442	0.670328	0.670328
129.5	0.079897	0.416358	0.738867	0.235754	0.658313	0.658313
130.5	0.082135	0.391874	0.72584	0.224209	0.646606	0.646606
131.5	0.07254	0.370281	0.710454	0.203304	0.636567	0.636567
132.5	0.069763	0.349685	0.696218	0.179334	0.629835	0.629835
133.5	0.066331	0.329535	0.680118	0.155125	0.621385	0.621385
134.5	0.06135	0.312627	0.663954	0.132775	0.612505	0.612505
135.5	0.055315	0.298815	0.646987	0.117723	0.599884	0.599884
136.5	0.053729	0.287033	0.627127	0.104067	0.583816	0.583816
137.5	0.048002	0.273414	0.606928	0.09675	0.564825	0.564825
138.5	0.047394	0.246857	0.584427	0.090789	0.542929	0.542929
139.5	0.044099	0.221644	0.565016	0.082103	0.526109	0.526109
140.5	0.043126	0.203529	0.548616	0.068669	0.515335	0.515335
141.5	0.03674	0.200891	0.530927	0.059055	0.501488	0.501488
142.5	0.031562	0.193473	0.512807	0.052244	0.485951	0.485951
143.5	0.033134	0.180246	0.492251	0.051857	0.46448	0.46448
144.5	0.031202	0.169923	0.468795	0.051075	0.440203	0.440203
145.5	0.028845	0.169034	0.444049	0.054052	0.412281	0.412281
146.5	0.025437	0.156647	0.419585	0.058646	0.383426	0.383426
147.5	0.024382	0.136777	0.398638	0.058046	0.361581	0.361581
148.5	0.023219	0.123593	0.377042	0.049747	0.344429	0.344429
149.5	0.022865	0.114111	0.351643	0.037457	0.326412	0.326412
150.5	0.01695	0.097435	0.32542	0.032844	0.302512	0.302512
151.5	0.016418	0.088708	0.297665	0.030448	0.275609	0.275609
152.5	0.018462	0.088934	0.27563	0.027146	0.255417	0.255417
153.5	0.023118	0.086751	0.260053	0.028629	0.238245	0.238245
154.5	0.018462	0.080938	0.241856	0.027963	0.220046	0.220046
155.5	0.018003	0.075553	0.220996	0.024837	0.201155	0.201155
156.5	0.016907	0.063606	0.203293	0.018935	0.187916	0.187916
157.5	0.015806	0.068292	0.18997	0.009273	0.182388	0.182388
158.5	0.018232	0.066124	0.178024	0.0067	0.17248	0.17248
159.5	0.015432	0.053093	0.163869	0.004245	0.160304	0.160304
160.5	0.014807	0.041225	0.146817	0.004174	0.143241	0.143241
161.5	0.014884	0.044037	0.133332	0.006774	0.127421	0.127421
162.5	0.010862	0.047665	0.12409	0.012712	0.112812	0.112812
163.5	0.016492	0.040684	0.119788	0.013167	0.108044	0.108044
164.5	0.009205	0.036799	0.115887	0.009503	0.107405	0.107405
165.5	0.015446	0.035588	0.10977	0.009321	0.101394	0.101394
166.5	0.015263	0.042751	0.098925	0.009051	0.090695	0.090695
167.5	0.016276	0.043944	0.086495	0.014539	0.073017	0.073017
168.5	0.013829	0.039891	0.076554	0.01398	0.063461	0.063461
169.5	0.012888	0.033717	0.072035	0.013588	0.059252	0.059252
170.5	0.012712	0.025973	0.066583	0.009404	0.057722	0.057722
171.5	0.010782	0.021121	0.063461	0.003203	0.060451	0.060451
172.5	0.010459	0.026023	0.061786	-0.002838	0.064442	0.064442
173.5	0.01391	0.025396	0.05215	-0.005263	0.057112	0.057112
174.5	0.011494	0.017619	0.043243	-0.001152	0.044344	0.044344
175.5	0.012976	0.019576	0.035797	0.005297	0.030663	0.030663
176.5	0.014993	0.020469	0.030378	0.001429	0.02899	0.02899
177.5	0.012896	0.016252	0.02486	-0.003621	0.028378	0.028378
