# Supplementary material for: Conduction pathway for potassium through the Escherichia coli pump KdpFABC
Source: eLife. 2025 Nov 19;14:RP107397. doi: 10.7554/eLife.107397 (PMC12629597; doi:10.7554/eLife.107397)
Supplement: Figure 2—figure supplement 1—source data 1. [file elife-107397-fig2-figsupp1-data1.xlsx]

## Sheet: Sheet1
map density	number of voxels
-1.7608	1
-1.70274	3
-1.64468	4
-1.58661	11
-1.52855	4
-1.47049	19
-1.41242	29
-1.35436	56
-1.2963	71
-1.23823	124
-1.18017	198
-1.12211	259
-1.06404	355
-1.00598	521
-0.94792	736
-0.88985	995
-0.83179	1399
-0.77373	1824
-0.71567	2430
-0.6576	3312
-0.59954	4450
-0.54148	5661
-0.48341	7039
-0.42535	8824
-0.36729	11135
-0.30922	13832
-0.25116	17616
-0.1931	23154
-0.13503	31241
-0.07697	40798
-0.01891	16777216
0.03916	47638
0.09722	40266
0.15528	29994
0.21335	20748
0.27141	14767
0.32947	10427
0.38754	7874
0.4456	6350
0.50366	5265
0.56173	4510
0.61979	3839
0.67785	3378
0.73592	3042
0.79398	2768
0.85204	2591
0.91011	2366
0.96817	2176
1.02623	1970
1.0843	1872
1.14236	1758
1.20042	1650
1.25849	1512
1.31655	1363
1.37461	1232
1.43268	1058
1.49074	951
1.5488	852
1.60686	691
1.66493	600
1.72299	496
1.78105	429
1.83912	375
1.89718	284
1.95524	247
2.01331	213
2.07137	154
2.12943	115
2.1875	94
2.24556	68
2.30362	62
2.36169	47
2.41975	30
2.47781	25
2.53588	18
2.59394	12
2.652	12
2.71007	3
2.76813	6
2.82619	4
2.88426	3
2.94232	1
3.00038	3
3.05845	0
3.11651	0
3.17457	1
3.23264	0
3.2907	1
3.34876	0
3.40683	0
3.46489	0
3.52295	0
3.58102	0
3.63908	0
3.69714	0
3.75521	0
3.81327	0
3.87133	0
3.92939	1
3.98746	0
4.04552	1
