# Supplementary material for: Conduction pathway for potassium through the Escherichia coli pump KdpFABC
Source: eLife. 2025 Nov 19;14:RP107397. doi: 10.7554/eLife.107397 (PMC12629597; doi:10.7554/eLife.107397)
Supplement: Figure 2—figure supplement 2—source data 1. — Each tab in the file contains data for one panel with the ion concentration indicated in the first row in mM and the time listed in the first column in seconds. [file elife-107397-fig2-figsupp2-data1.xlsx]

## Sheet: WT_K_S1_N1
	300	100	30	10	3	1	0.3	0.1	0.03	0.01	0.003	0
0	1.48e-05	8.86e-05	2.59e-05	-2.21e-05	-2.95e-05	-3.68e-06	7.4e-06	-2.58e-05	-9.97e-05	2.22e-05	1.48e-05	-5.91e-05
0.001	0.000108997	0.000553838	0.000164831	-0.000152192	-0.000202953	-2.71e-05	-4.51e-05	-0.00013142	-0.000513494	0.000119143	9.42e-05	-0.000335845
0.002	0.000422339	0.0016498	0.000485526	-0.000492037	-0.000657376	-0.000138456	-0.000353962	-0.000254683	-0.00110052	0.000336185	0.000272819	-0.000971268
0.003	0.00117327	0.00326841	0.000885463	-0.00108186	-0.00138408	-0.000473881	-0.00100395	-0.000172722	-0.00128727	0.000631864	0.000473879	-0.00201045
0.004	0.00260101	0.00507433	0.00117939	-0.00196214	-0.00219564	-0.00106423	-0.00188691	0.000251496	-0.000954836	0.000800534	0.000586152	-0.00340996
0.005	0.00478235	0.00682941	0.00132791	-0.00316499	-0.00287349	-0.00168215	-0.00296726	0.000953684	-0.000564406	0.000624143	0.000633648	-0.00498812
0.006	0.00749153	0.00848014	0.00134099	-0.0045586	-0.00334053	-0.00207789	-0.00427777	0.00179789	-0.00022316	0.000133269	0.000692159	-0.00641776
0.007	0.0103083	0.00997758	0.0010831	-0.00591143	-0.00372105	-0.0022353	-0.00572279	0.00268783	0.000357659	-0.000406359	0.000732708	-0.00736769
0.008	0.0128186	0.0111782	0.000365901	-0.00711133	-0.00425383	-0.0022666	-0.00712594	0.00358977	0.00091671	-0.000708737	0.000634286	-0.00774863
0.009	0.0147591	0.0120769	-0.000887682	-0.00810251	-0.00508106	-0.00224037	-0.00835542	0.0043931	0.000518479	-0.000628197	0.00023168	-0.0077803
0.01	0.0160772	0.0128829	-0.00262467	-0.00876074	-0.00610875	-0.00215347	-0.00925107	0.00474932	-0.00130729	-0.000173945	-0.000520062	-0.00775889
0.011	0.0168387	0.0137418	-0.00474466	-0.00905693	-0.00718066	-0.00202919	-0.00955254	0.00427395	-0.0039927	0.00056606	-0.00144007	-0.00779058
0.012	0.0171397	0.0146044	-0.00710086	-0.0090766	-0.00823455	-0.00194322	-0.00906148	0.00302214	-0.00681744	0.00146719	-0.00241393	-0.00777626
0.013	0.0170754	0.0153908	-0.0094179	-0.00882086	-0.00916358	-0.00190313	-0.00783119	0.00155937	-0.00950229	0.00232083	-0.00360938	-0.00762914
0.014	0.0166843	0.0161023	-0.0113236	-0.00821149	-0.00980653	-0.001856	-0.00615849	0.000437166	-0.0116707	0.00288814	-0.00518732	-0.00734649
0.015	0.01597	0.0167515	-0.0125722	-0.00718376	-0.0101345	-0.00175726	-0.00441051	-0.000310893	-0.0126727	0.00311547	-0.00699014	-0.00691108
0.016	0.014998	0.017368	-0.0131736	-0.00572808	-0.0102002	-0.00154812	-0.00289232	-0.000943717	-0.0121967	0.00313298	-0.00866249	-0.00634441
0.017	0.0138756	0.0180501	-0.0132102	-0.00393075	-0.00999159	-0.00119859	-0.00181849	-0.00136363	-0.0104905	0.00300828	-0.00988334	-0.00581431
0.018	0.0126097	0.0188106	-0.0126757	-0.00196976	-0.00948143	-0.000800953	-0.00133462	-0.00129023	-0.00799444	0.00267016	-0.0104406	-0.00552079
0.019	0.0111681	0.0195026	-0.0115524	-5.9e-05	-0.00866332	-0.000516014	-0.00148681	-0.000897308	-0.00515898	0.00205828	-0.0103127	-0.00543446
0.02	0.00967194	0.0199893	-0.00997358	0.00169081	-0.00753158	-0.000431829	-0.00214756	-0.00049195	-0.00250139	0.00121006	-0.00964627	-0.00526634
0.021	0.00833835	0.0202293	-0.00820762	0.00328677	-0.00617386	-0.000533218	-0.00310977	6.89e-05	-0.000460111	0.000226499	-0.0086369	-0.00480377
0.022	0.00730676	0.0202428	-0.00651158	0.00465365	-0.00484273	-0.000747816	-0.00418553	0.00095292	0.000711967	-0.00068687	-0.00750259	-0.00412063
0.023	0.0066419	0.0200599	-0.00505949	0.00565092	-0.00382539	-0.00101319	-0.00518662	0.00180499	0.000778272	-0.00120959	-0.0064394	-0.0033387
0.024	0.00637005	0.0197124	-0.00388567	0.00624527	-0.00324856	-0.00131267	-0.00598497	0.0021327	-0.000383549	-0.00117107	-0.00554088	-0.0024361
0.025	0.00639207	0.0192624	-0.00292055	0.00645582	-0.00304873	-0.00158522	-0.00656557	0.00193285	-0.00247627	-0.000760167	-0.00482219	-0.00139406
0.026	0.00653384	0.0187854	-0.00208812	0.0062362	-0.00309056	-0.001744	-0.00688832	0.00149729	-0.00503114	-0.000336465	-0.00436136	-0.000308311
0.027	0.0066833	0.0184214	-0.00134936	0.005551	-0.00322048	-0.00180612	-0.00678932	0.000738893	-0.00782121	-0.000132377	-0.00427185	0.000632061
0.028	0.00675417	0.0183821	-0.000784002	0.0045043	-0.00325328	-0.00178862	-0.00622573	-0.00071158	-0.0107475	-0.000139617	-0.00447742	0.00123563
0.029	0.00665042	0.0188073	-0.00053128	0.00325403	-0.00302522	-0.00170429	-0.00546092	-0.00276861	-0.0135714	-0.000210668	-0.00472312	0.00143934
0.03	0.00634319	0.0196953	-0.000566228	0.00192957	-0.00246378	-0.00175182	-0.00478693	-0.00474771	-0.0158632	-0.000245712	-0.00475883	0.00128835
0.031	0.00593661	0.02094	-0.000666132	0.000740148	-0.00165847	-0.00207714	-0.00423702	-0.00604994	-0.0172468	-0.000265833	-0.00429801	0.000883845
0.032	0.0055606	0.0223417	-0.000568504	-8.64e-05	-0.000789706	-0.00249507	-0.00363659	-0.00658379	-0.0177564	-0.000379789	-0.0029003	0.000400748
0.033	0.00526302	0.0236148	-0.000158877	-0.000492001	8.06e-05	-0.00287011	-0.00285072	-0.00636594	-0.0177339	-0.000704002	-0.000235321	2.41e-05
0.034	0.00508783	0.0245104	0.000453952	-0.00054457	0.000961895	-0.00340051	-0.00196159	-0.00527532	-0.0173117	-0.00119071	0.00350349	-0.000197631
0.035	0.00505337	0.0249296	0.00112988	-0.000348887	0.00180404	-0.00419172	-0.00116563	-0.00328709	-0.016277	-0.00157826	0.00770486	-0.00041677
0.036	0.0051106	0.0248413	0.00182926	5.02e-06	0.00254766	-0.00499898	-0.000606456	-0.000603101	-0.0145268	-0.00170963	0.0118579	-0.000842603
0.037	0.00526776	0.0242476	0.00247469	0.000568933	0.0031129	-0.00548286	-0.000389548	0.002336	-0.0122914	-0.00172478	0.0157636	-0.0014269
0.038	0.00560071	0.0232944	0.00293978	0.00146564	0.00335375	-0.00546562	-0.000603758	0.00496061	-0.00985454	-0.00174671	0.0193325	-0.00171771
0.039	0.0061701	0.0221925	0.00319294	0.0026616	0.00310512	-0.00508307	-0.00119267	0.00674245	-0.00739565	-0.00169175	0.0224244	-0.00126001
0.04	0.0070259	0.0210369	0.0032696	0.00397119	0.00225123	-0.00463544	-0.00191072	0.00721425	-0.00502581	-0.00148642	0.0247395	-6.35e-05
0.041	0.00812516	0.0198606	0.00321062	0.00520199	0.000835568	-0.00423146	-0.00256367	0.00614536	-0.00285447	-0.00128649	0.0258369	0.00153254
0.042	0.00925751	0.0188145	0.00310172	0.0061783	-0.000932667	-0.0037774	-0.00312671	0.00401844	-0.00119605	-0.00142242	0.0253808	0.00326785
0.043	0.0102249	0.0181297	0.0030199	0.00664109	-0.00284994	-0.00320375	-0.00349711	0.00192464	-0.000582228	-0.00205486	0.0232943	0.00504091
0.044	0.0109624	0.0179036	0.00292683	0.00631534	-0.0047028	-0.00251401	-0.00344558	0.000529257	-0.00125055	-0.00301416	0.0198416	0.00671829
0.045	0.01149	0.018065	0.00275782	0.00521286	-0.00618463	-0.00176754	-0.00292665	-0.000403504	-0.00272185	-0.00401822	0.0156305	0.00801469
0.046	0.011849	0.0185054	0.00263657	0.00357358	-0.00700026	-0.00110948	-0.00218686	-0.00118014	-0.00408195	-0.00492824	0.0113099	0.00855962
0.047	0.0120243	0.019156	0.00279883	0.00157646	-0.00697861	-0.000679485	-0.00152984	-0.00150155	-0.00470973	-0.00581332	0.00729196	0.0081597
0.048	0.0120395	0.019948	0.0032542	-0.000629372	-0.00621215	-0.000464616	-0.00111752	-0.00115542	-0.00469854	-0.00682969	0.00384824	0.00702587
0.049	0.0120503	0.0207186	0.00376941	-0.00290374	-0.0049975	-0.000349059	-0.000942493	-0.000839402	-0.0044392	-0.00812627	0.00128823	0.0055876
0.05	0.0121878	0.0212555	0.00422252	-0.00512116	-0.0036032	-0.000290021	-0.000869505	-0.00141162	-0.00402406	-0.00979571	-0.000150269	0.00415516
0.051	0.0124241	0.0214465	0.00473108	-0.0070973	-0.00228406	-0.000361865	-0.000759146	-0.00273785	-0.0033298	-0.0117466	-0.000576697	0.00293713
0.052	0.0126368	0.021259	0.00539009	-0.0086654	-0.00128472	-0.000666076	-0.000570682	-0.00405306	-0.00237037	-0.0136516	-0.000389972	0.00206601
0.053	0.0127221	0.0206464	0.00604837	-0.0097886	-0.000800341	-0.00114074	-0.000385947	-0.0050209	-0.00134042	-0.0152503	0.000106983	0.00145278
0.054	0.0126254	0.0196589	0.00644418	-0.0105514	-0.000994721	-0.00149741	-0.000311342	-0.00584121	-0.000498732	-0.0166154	0.000839953	0.000970485
0.055	0.0123774	0.0184965	0.00647923	-0.0110222	-0.00179994	-0.00149424	-0.00035344	-0.0067652	-3.99e-05	-0.0179071	0.00172803	0.000766627
0.056	0.0121684	0.0172975	0.00620811	-0.0111736	-0.00288686	-0.00116927	-0.000517494	-0.00794652	3.62e-05	-0.0190318	0.0024282	0.00108257
0.057	0.0122875	0.0161019	0.00567049	-0.0109751	-0.00398026	-0.00071552	-0.00082667	-0.00942699	-0.000183442	-0.0196888	0.00243477	0.00185489
0.058	0.0128674	0.0150394	0.00489525	-0.0104624	-0.00498132	-0.000248776	-0.00121487	-0.010977	-0.000611467	-0.0197623	0.00158677	0.00282272
0.059	0.0137887	0.0143298	0.0039884	-0.00967899	-0.00587838	0.000164154	-0.00160882	-0.0122777	-0.000949134	-0.019478	0.000254641	0.00388341
0.06	0.0148873	0.0140883	0.00311893	-0.00866221	-0.00668432	0.000404178	-0.00203715	-0.0133437	-0.000864638	-0.0191401	-0.00109117	0.0049932
0.061	0.0160227	0.0142081	0.00242512	-0.00750166	-0.00734419	0.00039244	-0.00267776	-0.0142231	-0.000469212	-0.0189328	-0.00223004	0.00592294
0.062	0.017052	0.0144552	0.00195079	-0.00636146	-0.00768177	0.000172885	-0.00380336	-0.01454	-0.000172187	-0.0188749	-0.00317901	0.00635405
0.063	0.0179524	0.014675	0.00167483	-0.00549662	-0.0075503	-0.000142621	-0.00550452	-0.0139155	-0.000166522	-0.0188801	-0.00398766	0.00600438
0.064	0.0187821	0.0148575	0.00156197	-0.0051107	-0.00698965	-0.000478001	-0.007561	-0.012533	-0.00026098	-0.0188791	-0.00458654	0.00467102
0.065	0.0195328	0.0149983	0.00158146	-0.00514561	-0.00612144	-0.000896777	-0.00969361	-0.0109199	-6.12e-05	-0.0188543	-0.004894	0.00237997
0.066	0.020138	0.0150014	0.00175773	-0.00537631	-0.00498703	-0.00169979	-0.0117273	-0.00934753	0.000638935	-0.0188518	-0.00490984	-0.000613631
0.067	0.0205346	0.0147566	0.00213762	-0.00565501	-0.00367062	-0.00328684	-0.0134687	-0.00793226	0.00151101	-0.0189339	-0.00464335	-0.00400625
0.068	0.0206895	0.014285	0.00269874	-0.00601937	-0.00242713	-0.00576139	-0.0146956	-0.00710946	0.00196395	-0.0190538	-0.00413634	-0.00743008
0.069	0.0206103	0.0137243	0.00341018	-0.00655066	-0.00145552	-0.00877259	-0.0153864	-0.00729368	0.00181787	-0.0190866	-0.00347367	-0.0104766
0.07	0.020368	0.0131875	0.00425197	-0.00719085	-0.00074782	-0.0117627	-0.0157628	-0.00830702	0.00150426	-0.018973	-0.00268516	-0.0129752
0.071	0.0200607	0.0127514	0.00516532	-0.00785368	-0.000317564	-0.0143389	-0.0160393	-0.00963159	0.00150778	-0.0186928	-0.00189945	-0.015017
0.072	0.01972	0.0124496	0.0061066	-0.00847854	-0.000332822	-0.0163842	-0.016326	-0.0109856	0.00162256	-0.0181867	-0.00143176	-0.0166132
0.073	0.0192716	0.0122335	0.00703438	-0.00889827	-0.000889077	-0.0179013	-0.016677	-0.0123684	0.00113435	-0.0174837	-0.00146207	-0.0175307
0.074	0.0186047	0.0120524	0.00784415	-0.00900493	-0.00184424	-0.01892	-0.0170603	-0.0136551	-0.000188905	-0.0168083	-0.00191125	-0.0175234
0.075	0.0176465	0.0119082	0.00838515	-0.00897281	-0.00298032	-0.0194409	-0.0174195	-0.0144596	-0.00187698	-0.0164137	-0.0026851	-0.0166484
0.076	0.0163714	0.0118372	0.00850114	-0.00912085	-0.00414539	-0.0194527	-0.0177269	-0.0145673	-0.00356922	-0.0163875	-0.00378622	-0.0153682
0.077	0.0148569	0.0119354	0.00807131	-0.00967227	-0.005224	-0.0190695	-0.017894	-0.0142658	-0.00531454	-0.0166201	-0.00515745	-0.0143127
0.078	0.013215	0.0123323	0.00712227	-0.0105974	-0.00620042	-0.0184991	-0.017811	-0.013977	-0.00698057	-0.0168579	-0.00661526	-0.0137852
0.079	0.0113982	0.0130767	0.00588943	-0.01165	-0.00713128	-0.0178868	-0.0174811	-0.0137788	-0.00808866	-0.0168859	-0.00795743	-0.0134782
0.08	0.00926239	0.0141159	0.00465347	-0.0125835	-0.00798327	-0.017278	-0.0169763	-0.0136646	-0.00834132	-0.0167134	-0.00900915	-0.0127663
0.081	0.0067162	0.0153173	0.0036076	-0.0132464	-0.00871476	-0.0166921	-0.016363	-0.0140984	-0.00795927	-0.0165423	-0.00968111	-0.0112548
0.082	0.00372206	0.0165088	0.00281631	-0.0135865	-0.00931768	-0.0162201	-0.0157089	-0.0156753	-0.00739433	-0.0165727	-0.0100278	-0.00899843
0.083	0.000341782	0.0176135	0.00220564	-0.0136524	-0.00970983	-0.0159835	-0.0149823	-0.0182331	-0.00690622	-0.0167943	-0.0101806	-0.00637832
0.084	-0.00327611	0.0185762	0.00169653	-0.013509	-0.00978189	-0.0160133	-0.0140782	-0.0209033	-0.00661929	-0.0171009	-0.0102725	-0.00394709
0.085	-0.00698096	0.0192612	0.0012487	-0.013263	-0.00947286	-0.016271	-0.0131113	-0.0229992	-0.00670479	-0.0176054	-0.0103398	-0.0022586
0.086	-0.0105729	0.0196473	0.000824398	-0.0131051	-0.00886419	-0.0166107	-0.0123988	-0.0244276	-0.00727551	-0.0184921	-0.0101894	-0.00160562
0.087	-0.0138331	0.0198432	0.000447107	-0.0131361	-0.00820143	-0.0167218	-0.0120953	-0.0252921	-0.00824265	-0.0196689	-0.00958155	-0.00190137
0.088	-0.01657	0.0198725	0.000205588	-0.0132947	-0.00772278	-0.0163085	-0.0121501	-0.0255559	-0.00945726	-0.0208726	-0.00857517	-0.00289844
0.089	-0.0184821	0.0196955	0.000152825	-0.0134646	-0.00756343	-0.0153047	-0.0125383	-0.0252669	-0.0109004	-0.021976	-0.00748179	-0.00435865
0.09	-0.0191913	0.0193343	0.000314942	-0.013575	-0.0077892	-0.0139406	-0.0132149	-0.0247535	-0.0123317	-0.0230175	-0.00656698	-0.00599988
0.091	-0.0185501	0.0188559	0.000772805	-0.0136672	-0.00846656	-0.0125518	-0.0140053	-0.024332	-0.012949	-0.0239795	-0.00584734	-0.00751358
0.092	-0.0167431	0.0183523	0.00150788	-0.0138413	-0.00968724	-0.0113007	-0.0147462	-0.0238804	-0.0119374	-0.0247378	-0.00518918	-0.00869185
0.093	-0.0140863	0.0179394	0.00227499	-0.0141428	-0.0114428	-0.0102397	-0.0153475	-0.0230157	-0.00915803	-0.0252434	-0.00453941	-0.00953792
0.094	-0.0108904	0.0176798	0.00283295	-0.014531	-0.0135347	-0.00946614	-0.0156995	-0.0217246	-0.00506855	-0.0255186	-0.00393908	-0.010171
0.095	-0.00740143	0.0175404	0.003161	-0.0149305	-0.0157155	-0.00897377	-0.0156736	-0.0203272	-0.000272558	-0.0255371	-0.00352439	-0.0106243
0.096	-0.00382975	0.017476	0.00337855	-0.0152682	-0.0178058	-0.00857784	-0.0152306	-0.0190407	0.00465807	-0.0253707	-0.0034779	-0.01087
0.097	-0.000473726	0.0174761	0.00359222	-0.0154687	-0.0196553	-0.00815776	-0.014464	-0.0180656	0.0090872	-0.0252563	-0.00384454	-0.0109194
0.098	0.00230413	0.0175372	0.00382477	-0.0154541	-0.0211405	-0.00778787	-0.0135406	-0.0177883	0.0122979	-0.0253931	-0.00456922	-0.0108924
0.099	0.00418416	0.0176371	0.00404714	-0.0151606	-0.0220773	-0.00757972	-0.0126616	-0.0186185	0.013692	-0.025924	-0.0056462	-0.0110926
0.1	0.00501461	0.0177193	0.00426962	-0.0146356	-0.0222282	-0.00756827	-0.0119892	-0.0206204	0.0130125	-0.0269517	-0.00701842	-0.0117978
0.101	0.00487761	0.0177691	0.00451468	-0.0140177	-0.0216502	-0.00772743	-0.0116381	-0.023417	0.010477	-0.028455	-0.00843992	-0.0129788
0.102	0.00396519	0.0178555	0.00473753	-0.0133154	-0.0207439	-0.00793909	-0.0117152	-0.0265176	0.00673898	-0.0303864	-0.00962945	-0.0144144
0.103	0.00247198	0.0180308	0.00490849	-0.0124574	-0.01988	-0.00803612	-0.0121775	-0.0295004	0.00251325	-0.0327214	-0.0104928	-0.0158895
0.104	0.000699368	0.0182622	0.00506648	-0.0115057	-0.0192516	-0.00796865	-0.012895	-0.0319803	-0.00174485	-0.0353496	-0.0110996	-0.0171839
0.105	-0.000866156	0.0184935	0.00517122	-0.0105612	-0.0189332	-0.00786308	-0.0139321	-0.0337261	-0.00579699	-0.0381082	-0.0115299	-0.0181266
0.106	-0.00179859	0.0186859	0.00506942	-0.00970596	-0.0189189	-0.00794936	-0.0155108	-0.0347727	-0.00957573	-0.0408583	-0.0118324	-0.018667
0.107	-0.00197929	0.0187862	0.00459895	-0.00908742	-0.0191686	-0.00839948	-0.0177097	-0.0354378	-0.0130646	-0.0435116	-0.011988	-0.0187719
0.108	-0.00148658	0.0187503	0.00365293	-0.00885876	-0.0195939	-0.00923442	-0.0202441	-0.0362105	-0.0161686	-0.0460761	-0.0118698	-0.0184246
0.109	-0.000434795	0.0185592	0.00229374	-0.00912806	-0.0200364	-0.0104384	-0.0225409	-0.0373742	-0.018976	-0.0485083	-0.011424	-0.0178253
0.11	0.000974876	0.0181581	0.000730401	-0.0099644	-0.0203848	-0.0120029	-0.0240267	-0.0387894	-0.0217523	-0.0505178	-0.0108059	-0.0173796
0.111	0.00244	0.0175184	-0.0008658	-0.0114047	-0.0206692	-0.0138201	-0.0244453	-0.0400826	-0.0244161	-0.0516539	-0.0102203	-0.0173631
0.112	0.0037176	0.0168011	-0.0024066	-0.0134055	-0.020963	-0.0156825	-0.023994	-0.0409309	-0.0264713	-0.0516057	-0.00978564	-0.0177542
0.113	0.00465927	0.0162593	-0.00382784	-0.0157848	-0.0213011	-0.0173899	-0.0230532	-0.0411878	-0.0276294	-0.0504758	-0.00960992	-0.0183333
0.114	0.00508768	0.0159944	-0.0050638	-0.0183137	-0.021699	-0.0188134	-0.0218613	-0.0407533	-0.0281631	-0.048594	-0.00977149	-0.0188379
0.115	0.00484956	0.0159332	-0.00607212	-0.0207216	-0.0221074	-0.0198969	-0.0205587	-0.0395777	-0.028378	-0.0461184	-0.0102518	-0.0191302
0.116	0.00393288	0.0159664	-0.00681911	-0.022618	-0.0224779	-0.0205761	-0.0193502	-0.0379019	-0.0281313	-0.0431339	-0.0110458	-0.0192031
0.117	0.0024698	0.0160223	-0.00726046	-0.0236541	-0.0229289	-0.020752	-0.0184671	-0.0361748	-0.0272451	-0.0399083	-0.0120903	-0.0190437
0.118	0.000734234	0.0159957	-0.00745153	-0.0237031	-0.0235835	-0.0204395	-0.0180829	-0.034693	-0.0259051	-0.0368171	-0.013157	-0.0186065
0.119	-0.00101421	0.0157907	-0.00759142	-0.0228109	-0.0243981	-0.0197342	-0.0183166	-0.0335197	-0.0243539	-0.0341246	-0.014093	-0.0180032
0.12	-0.00269111	0.0154809	-0.00790046	-0.0211272	-0.0254011	-0.0186531	-0.0191796	-0.0327037	-0.0226486	-0.031899	-0.0149458	-0.0175773
0.121	-0.00428139	0.0151897	-0.00851022	-0.0189256	-0.0267993	-0.0173067	-0.0205216	-0.0323673	-0.0208316	-0.0300912	-0.0157727	-0.0174862
0.122	-0.00574444	0.0149279	-0.00943606	-0.01655	-0.0286537	-0.0160939	-0.0220967	-0.0325555	-0.0190827	-0.0286202	-0.0165627	-0.0174347
0.123	-0.00703083	0.0146701	-0.0106184	-0.0143024	-0.0307188	-0.0154772	-0.0236396	-0.0331842	-0.0176578	-0.0274871	-0.017315	-0.0170624
0.124	-0.00807498	0.0143454	-0.0119302	-0.0124487	-0.0326882	-0.0156514	-0.0249704	-0.0341713	-0.0168415	-0.0268059	-0.0180428	-0.0163768
0.125	-0.00885415	0.0138072	-0.0131971	-0.0112383	-0.0343252	-0.0165024	-0.0260908	-0.0353984	-0.0169693	-0.0265738	-0.018732	-0.0157356
0.126	-0.00949206	0.0130039	-0.0143214	-0.0107858	-0.0353927	-0.0177328	-0.0270558	-0.0365165	-0.018204	-0.0265827	-0.0193533	-0.0154044
0.127	-0.0101658	0.0120658	-0.0153143	-0.0110052	-0.0357132	-0.0190091	-0.027908	-0.0370554	-0.0203177	-0.0266377	-0.0199155	-0.0153649
0.128	-0.0109123	0.0111687	-0.0161545	-0.011733	-0.035208	-0.0201103	-0.0287873	-0.036801	-0.0227708	-0.0266458	-0.0204218	-0.0156612
0.129	-0.0115986	0.0104397	-0.0167209	-0.0127967	-0.0338215	-0.0209872	-0.0297995	-0.0360475	-0.0248595	-0.0266007	-0.0207146	-0.0164198
0.13	-0.0119946	0.0100073	-0.0169765	-0.0139571	-0.0315866	-0.0217713	-0.0308341	-0.0354018	-0.0259074	-0.0265479	-0.0205143	-0.0175247
0.131	-0.0118455	0.010028	-0.0170262	-0.0149029	-0.0287238	-0.022715	-0.0316795	-0.0351909	-0.0255819	-0.02644	-0.0196951	-0.0186793
0.132	-0.010993	0.0105936	-0.0169526	-0.0153426	-0.0254904	-0.0240201	-0.0322403	-0.0351955	-0.024087	-0.0262063	-0.0183813	-0.0196519
0.133	-0.00952637	0.0116407	-0.0168066	-0.0151571	-0.022067	-0.025667	-0.0325354	-0.0350812	-0.0219157	-0.0258833	-0.0167655	-0.0202361
0.134	-0.00779098	0.0129649	-0.0166101	-0.0143308	-0.0186916	-0.0273579	-0.0325225	-0.0348257	-0.0194088	-0.025484	-0.0149768	-0.0201875
0.135	-0.00625004	0.0143121	-0.0163087	-0.0127247	-0.0156918	-0.028675	-0.0320918	-0.0344639	-0.0165041	-0.024976	-0.0130895	-0.0194587
0.136	-0.00525554	0.015509	-0.0158502	-0.0102004	-0.0133901	-0.0293496	-0.0312252	-0.0337346	-0.0129683	-0.0244236	-0.011119	-0.0183657
0.137	-0.00480757	0.0165038	-0.015268	-0.00684821	-0.0120171	-0.0293353	-0.0300364	-0.0324138	-0.00896966	-0.0239132	-0.00909722	-0.0172988
0.138	-0.00462134	0.0172696	-0.0146509	-0.00296447	-0.0115984	-0.0286565	-0.0286825	-0.0306514	-0.0050225	-0.0233234	-0.00730896	-0.0162985
0.139	-0.00443315	0.0177386	-0.0140576	0.000943125	-0.0119327	-0.0273723	-0.0273564	-0.0286202	-0.0014739	-0.0224478	-0.00617059	-0.0150757
0.14	-0.00413684	0.0178965	-0.0135264	0.00425216	-0.0127371	-0.025655	-0.0262613	-0.0263293	0.0013669	-0.0213167	-0.00577963	-0.013391
0.141	-0.00368631	0.0178662	-0.0131146	0.00654313	-0.0138088	-0.0236836	-0.0254629	-0.0239159	0.00291445	-0.0200806	-0.00596709	-0.0112994
0.142	-0.00299964	0.0177727	-0.0128758	0.00764371	-0.0150452	-0.0215408	-0.0249375	-0.0215811	0.00268186	-0.0187591	-0.00661979	-0.0090961
0.143	-0.00200715	0.0176152	-0.0128651	0.00751592	-0.0164076	-0.0192955	-0.0248069	-0.0192573	0.000825254	-0.0173273	-0.0076366	-0.00706336
0.144	-0.000717544	0.0173543	-0.0131144	0.00628593	-0.0178636	-0.0170945	-0.0252628	-0.0167063	-0.00195958	-0.0158716	-0.00879137	-0.00529793
0.145	0.000813058	0.017081	-0.013493	0.0041906	-0.0192572	-0.0151792	-0.0262141	-0.0139281	-0.00499091	-0.0145525	-0.00982238	-0.00376022
0.146	0.00253852	0.0169922	-0.0136834	0.00156178	-0.020297	-0.0137687	-0.0272431	-0.0112502	-0.00786894	-0.013475	-0.0105536	-0.00242304
0.147	0.0043717	0.0171513	-0.0134306	-0.00115818	-0.0207815	-0.0129554	-0.0279565	-0.00893627	-0.0102832	-0.012595	-0.0108817	-0.00144574
0.148	0.00610215	0.0174554	-0.0126535	-0.00359579	-0.0207222	-0.0127786	-0.0281968	-0.0069279	-0.0118757	-0.0117795	-0.0108537	-0.00123062
0.149	0.00748455	0.017834	-0.0113939	-0.00555972	-0.0201779	-0.0131995	-0.0279902	-0.00519949	-0.0125038	-0.0110271	-0.01068	-0.00214505
0.15	0.00839214	0.0183159	-0.00986436	-0.00699233	-0.0192284	-0.0139817	-0.0274194	-0.00412003	-0.0124621	-0.0105009	-0.0104517	-0.00416675
0.151	0.0088743	0.0189429	-0.00822388	-0.00796043	-0.0181848	-0.0147701	-0.0264688	-0.0040191	-0.0121792	-0.0103876	-0.0100381	-0.00693634
0.152	0.00907361	0.0197106	-0.00639965	-0.0085988	-0.0174302	-0.0152274	-0.025063	-0.00461388	-0.0117895	-0.0108333	-0.0093046	-0.00999051
0.153	0.00909943	0.0205354	-0.00439783	-0.00899035	-0.017029	-0.0150753	-0.0232153	-0.00537311	-0.0111737	-0.011852	-0.00827642	-0.0127742
0.154	0.00904383	0.0213131	-0.00242866	-0.00914061	-0.0168332	-0.0141516	-0.0210352	-0.00616265	-0.0102983	-0.013284	-0.00714515	-0.0147572
0.155	0.00900128	0.0220169	-0.000704337	-0.00907788	-0.0167592	-0.012503	-0.0186614	-0.00709919	-0.00930433	-0.014889	-0.00617096	-0.0157895
0.156	0.00905081	0.0226447	0.000677419	-0.00893599	-0.0167259	-0.0103527	-0.0162417	-0.00812943	-0.00832776	-0.0164415	-0.00552323	-0.016095
0.157	0.00926892	0.0231395	0.00178951	-0.00882594	-0.0166038	-0.00795214	-0.0139943	-0.0091036	-0.00753153	-0.0177816	-0.00518926	-0.0159205
0.158	0.00969805	0.0233998	0.00281422	-0.00875708	-0.0163614	-0.0055205	-0.012201	-0.0100008	-0.0072992	-0.0188477	-0.00504651	-0.0154328
0.159	0.0103003	0.0233935	0.0038587	-0.00874148	-0.0161032	-0.00330892	-0.011088	-0.0108807	-0.0080744	-0.0196709	-0.00504793	-0.0148334
0.16	0.0109479	0.0232467	0.00481278	-0.00885629	-0.015941	-0.0016277	-0.0106914	-0.0117165	-0.00997259	-0.0202406	-0.0052967	-0.014432
0.161	0.0115002	0.0231374	0.00537531	-0.00925524	-0.0158808	-0.000712819	-0.0108284	-0.012447	-0.01269	-0.0204765	-0.00586031	-0.0144791
0.162	0.0118713	0.0231799	0.00534085	-0.0100427	-0.0158211	-0.000541281	-0.0112566	-0.0131147	-0.0157254	-0.0203898	-0.00662317	-0.0148512
0.163	0.0119906	0.0234285	0.00479215	-0.0110781	-0.0156686	-0.000927096	-0.011809	-0.0137129	-0.0185512	-0.0200212	-0.00735737	-0.0151787
0.164	0.0117744	0.0238894	0.00391802	-0.0120261	-0.0154672	-0.00185338	-0.0123928	-0.0140786	-0.0206094	-0.0192502	-0.00772912	-0.0153595
0.165	0.0111912	0.0244825	0.0028757	-0.0125837	-0.0153883	-0.00344204	-0.0129338	-0.0141218	-0.0214411	-0.0178859	-0.00727985	-0.015606
0.166	0.0103243	0.0250265	0.00180305	-0.012559	-0.0155599	-0.00561705	-0.0133411	-0.0139888	-0.0210366	-0.0159564	-0.00567248	-0.0158135
0.167	0.0093576	0.0253375	0.000761779	-0.0118887	-0.0159572	-0.00808296	-0.0135825	-0.0138838	-0.0198327	-0.013823	-0.00290259	-0.0152658
0.168	0.00847648	0.0253422	-0.000199062	-0.0107041	-0.0164569	-0.0105197	-0.0137868	-0.0137221	-0.018168	-0.0119283	0.000763268	-0.0132754
0.169	0.00770725	0.0250683	-0.000949632	-0.00922744	-0.0169609	-0.0126787	-0.0142038	-0.0132116	-0.0161055	-0.0104791	0.00484456	-0.00972099
0.17	0.0069448	0.0245414	-0.00138748	-0.00760992	-0.017545	-0.0143926	-0.0150128	-0.0124145	-0.0138465	-0.00942594	0.00878362	-0.00493075
0.171	0.00619059	0.0237216	-0.00151964	-0.00600692	-0.0184318	-0.015582	-0.0161714	-0.0116241	-0.0117506	-0.00863971	0.012182	0.000484224
0.172	0.00556517	0.0226279	-0.00139168	-0.0046508	-0.019745	-0.0162732	-0.0174314	-0.0107518	-0.0100137	-0.00797859	0.0148034	0.00587456
0.173	0.00515195	0.021447	-0.00107696	-0.00368549	-0.0213775	-0.0165684	-0.0185073	-0.00960057	-0.00869104	-0.00729545	0.0164478	0.0109466
0.174	0.0050317	0.0203729	-0.000658043	-0.00307606	-0.0230585	-0.0165982	-0.019236	-0.00838118	-0.00780184	-0.00656033	0.0170101	0.0155765
0.175	0.00526973	0.01946	-0.000154643	-0.00271839	-0.0244692	-0.0164226	-0.0195567	-0.00736127	-0.00729256	-0.00588103	0.0166115	0.0192261
0.176	0.00579163	0.0186889	0.000399708	-0.00255359	-0.0253699	-0.0160169	-0.0194627	-0.00637358	-0.00705103	-0.00529731	0.0155254	0.0211543
0.177	0.0064262	0.0180516	0.000908366	-0.00255031	-0.0256439	-0.015434	-0.0190268	-0.00507814	-0.00689108	-0.00473864	0.0139338	0.0210433
0.178	0.00702659	0.017526	0.0013032	-0.00261846	-0.0252482	-0.0147914	-0.0184696	-0.00352064	-0.00648113	-0.00416601	0.0118616	0.0190387
0.179	0.00755338	0.017053	0.00159476	-0.00262139	-0.0242151	-0.0141337	-0.0181592	-0.00210329	-0.00552921	-0.00359597	0.00940507	0.0155045
0.18	0.00808666	0.0166051	0.00178475	-0.00247663	-0.0226937	-0.0134837	-0.0182765	-0.00101714	-0.004204	-0.00316466	0.00676496	0.010849
0.181	0.00867427	0.0162299	0.00184643	-0.0022522	-0.0208536	-0.012919	-0.0186063	-0.000156077	-0.00304921	-0.00308719	0.00406755	0.00551508
0.182	0.00920627	0.0160627	0.00178884	-0.00212574	-0.0187152	-0.0125418	-0.018839	0.000354733	-0.00233578	-0.00335088	0.00141336	1.64e-05
0.183	0.00951223	0.016236	0.00159725	-0.00221475	-0.0162836	-0.0124561	-0.0187733	0.000166541	-0.00189908	-0.00373075	-0.00100348	-0.00525364
0.184	0.0095101	0.0167483	0.00128636	-0.00250263	-0.0137678	-0.0126619	-0.0182663	-0.000792862	-0.00156528	-0.00415276	-0.00292272	-0.0101383
0.185	0.00926794	0.0174969	0.000975878	-0.00294337	-0.0114448	-0.0128821	-0.0172172	-0.00228801	-0.00133911	-0.00479836	-0.00415832	-0.0144376
0.186	0.00901501	0.0183374	0.000747714	-0.00351121	-0.00946415	-0.0127115	-0.0156514	-0.00408673	-0.00116216	-0.00591837	-0.00463416	-0.0176918
0.187	0.00903197	0.019102	0.000543655	-0.00412154	-0.00789026	-0.0119576	-0.0137878	-0.00600503	-0.000579889	-0.00763755	-0.00429776	-0.0195005
0.188	0.00943141	0.0196606	0.000216057	-0.00465406	-0.00677235	-0.0106549	-0.0118856	-0.00774411	0.00106508	-0.00986104	-0.00320894	-0.0198514
0.189	0.0101053	0.0199958	-0.000366926	-0.00506507	-0.00610107	-0.00887787	-0.0101281	-0.00891096	0.00395959	-0.0122601	-0.00160371	-0.0189965
0.19	0.0109067	0.0201946	-0.00121643	-0.00537878	-0.00581942	-0.00675651	-0.00863424	-0.00932444	0.00766478	-0.0143368	0.000259645	-0.0172338
0.191	0.0117843	0.0203169	-0.00217198	-0.00559175	-0.00589907	-0.00455158	-0.00737028	-0.00927916	0.0115858	-0.0156258	0.00206604	-0.0148776
0.192	0.0127062	0.0203762	-0.00305638	-0.00567389	-0.00633348	-0.00251961	-0.00618373	-0.00930493	0.0153563	-0.015967	0.00334039	-0.0122557
0.193	0.0135725	0.0204535	-0.00379396	-0.00561752	-0.00711297	-0.00080241	-0.00500313	-0.00969192	0.0188101	-0.0156496	0.00370594	-0.00967616
0.194	0.0142918	0.0206244	-0.00421053	-0.00539423	-0.00817888	0.000464403	-0.00383918	-0.0105147	0.0217552	-0.0152008	0.00312425	-0.00738629
0.195	0.0148369	0.0208202	-0.00404028	-0.00494273	-0.00938128	0.00116986	-0.00267433	-0.0119272	0.0239639	-0.0149438	0.00182311	-0.00550233
0.196	0.0151784	0.0209154	-0.00324325	-0.00424211	-0.0105609	0.0013253	-0.00153005	-0.0139728	0.0253596	-0.0148719	0.000154255	-0.00408983
0.197	0.0152648	0.0208138	-0.00202672	-0.00333108	-0.0115792	0.000948227	-0.000511675	-0.0162613	0.0260969	-0.014903	-0.00157	-0.00327102
0.198	0.0150938	0.020412	-0.000604167	-0.00234984	-0.0122867	6.57e-05	0.000211031	-0.0182518	0.0264477	-0.0150305	-0.00319878	-0.00313112
0.199	0.0147543	0.0197231	0.000879601	-0.00153077	-0.0126036	-0.00117128	0.000430539	-0.0196507	0.0265529	-0.0152606	-0.00467124	-0.00358659
0.2	0.0143908	0.0189418	0.00230857	-0.000954005	-0.0125954	-0.00265023	3.64e-05	-0.0203268	0.026193	-0.0155481	-0.005905	-0.00436555
0.201	0.0141361	0.0181947	0.00361743	-0.000391844	-0.012426	-0.00440314	-0.000964146	-0.0202366	0.0249052	-0.0158211	-0.00676381	-0.00518784
0.202	0.0141002	0.0174661	0.00476095	0.000424576	-0.0122229	-0.00643594	-0.00253615	-0.0195143	0.0224983	-0.0160225	-0.00709504	-0.00596809
0.203	0.0143387	0.0167729	0.00566286	0.00144849	-0.0120079	-0.00865584	-0.00458815	-0.0182923	0.0192879	-0.0160528	-0.00683659	-0.00670754
0.204	0.014798	0.0161651	0.00622407	0.00235225	-0.0117808	-0.0108592	-0.0069149	-0.0164933	0.0156171	-0.0157929	-0.00604462	-0.00735089
0.205	0.0153946	0.0156607	0.00630662	0.0027906	-0.0116073	-0.0127191	-0.0092756	-0.014059	0.0114133	-0.0153058	-0.00485403	-0.00777445
0.206	0.0160737	0.0152634	0.00581849	0.00255859	-0.0116226	-0.0140018	-0.0115234	-0.0113219	0.00644529	-0.0148589	-0.00348072	-0.00771069
0.207	0.0167388	0.0149404	0.00487649	0.00165026	-0.0119799	-0.0147272	-0.0135692	-0.0088734	0.000719637	-0.014618	-0.00222156	-0.0069035
0.208	0.0172732	0.0146053	0.0037218	0.000219006	-0.012736	-0.0150158	-0.0153121	-0.00713095	-0.00552157	-0.0144127	-0.00136277	-0.0054057
0.209	0.0176644	0.0142066	0.0025234	-0.00156836	-0.0138016	-0.0149912	-0.0167135	-0.00628036	-0.0118357	-0.0139529	-0.00100413	-0.0035652
0.21	0.0179825	0.0138198	0.00141597	-0.00362595	-0.0150629	-0.0148728	-0.0178183	-0.00641228	-0.0175761	-0.0132328	-0.00102517	-0.00178152
0.211	0.0182007	0.0135626	0.000525196	-0.00591991	-0.0164038	-0.0149368	-0.0186683	-0.00748378	-0.0220994	-0.0125076	-0.00125843	-0.000304615
0.212	0.0181619	0.013438	-0.000127527	-0.00835459	-0.0176429	-0.0153039	-0.0192635	-0.00924296	-0.0250228	-0.0119602	-0.00163248	0.000780235
0.213	0.017781	0.0133218	-0.000510843	-0.0106338	-0.0186912	-0.0158304	-0.0195912	-0.0111823	-0.0263273	-0.0115439	-0.00215552	0.00141474
0.214	0.0172044	0.0131424	-0.000502578	-0.012317	-0.0195763	-0.0162472	-0.0196435	-0.0127633	-0.0261538	-0.0110632	-0.00278862	0.00146987
0.215	0.0166936	0.0129996	-9.81e-05	-0.0130598	-0.0202111	-0.0163941	-0.0194117	-0.0138584	-0.0246183	-0.0104302	-0.00341878	0.000850433
0.216	0.0163687	0.0130373	0.000505707	-0.0127625	-0.0204317	-0.0162375	-0.0188719	-0.0146618	-0.0219757	-0.00975157	-0.00398275	-0.000392643
0.217	0.0162169	0.0133142	0.00101916	-0.0115784	-0.020183	-0.015815	-0.0179658	-0.0152493	-0.0186054	-0.00914285	-0.00440578	-0.00202706
0.218	0.0162596	0.0137935	0.00118875	-0.00978391	-0.0194939	-0.0152992	-0.0166773	-0.0155585	-0.0147709	-0.00872189	-0.00453547	-0.00362444
0.219	0.0164921	0.0143727	0.000977387	-0.00759835	-0.0183957	-0.0148067	-0.0151347	-0.0155534	-0.0107568	-0.00867614	-0.00433833	-0.00479925
0.22	0.0168403	0.0149446	0.000528653	-0.0052455	-0.0169749	-0.0141787	-0.0136018	-0.0151873	-0.00714905	-0.00911122	-0.00393746	-0.00553118
0.221	0.0172705	0.015451	9.35e-06	-0.00305813	-0.0155421	-0.0132161	-0.0123861	-0.0144553	-0.0045838	-0.00998257	-0.00349421	-0.00605889
0.222	0.0177514	0.0158617	-0.000433302	-0.00128602	-0.0145669	-0.0119428	-0.0116589	-0.0136096	-0.00322616	-0.011217	-0.00318056	-0.00645082
0.223	0.0181336	0.0161049	-0.000776416	8.2e-06	-0.0143266	-0.0105761	-0.0113477	-0.0130409	-0.00282591	-0.0126981	-0.00307044	-0.00654955
0.224	0.0181983	0.016104	-0.00107605	0.000807159	-0.014783	-0.00930545	-0.0113099	-0.0129733	-0.00322245	-0.0142038	-0.00311553	-0.00633806
0.225	0.0177964	0.0158733	-0.00130186	0.00105016	-0.015693	-0.00817044	-0.0115258	-0.0135267	-0.00438357	-0.0155079	-0.00334569	-0.00598696
0.226	0.0169246	0.015501	-0.00142027	0.000644973	-0.0167381	-0.00720031	-0.0119863	-0.0148271	-0.00605876	-0.0164608	-0.00383515	-0.00553273
0.227	0.0157235	0.0151024	-0.00147685	-0.00043453	-0.0176508	-0.00649207	-0.0125324	-0.0168292	-0.00779985	-0.0170786	-0.00446264	-0.00483094
0.228	0.014407	0.0148181	-0.00148438	-0.00204942	-0.0182156	-0.00619292	-0.0129184	-0.0192606	-0.00918989	-0.0175518	-0.00498278	-0.00388391
0.229	0.0131309	0.0147621	-0.00138966	-0.00392016	-0.0182627	-0.00645112	-0.0129931	-0.021892	-0.00999997	-0.0179795	-0.00527113	-0.00303218
0.23	0.0119656	0.0149213	-0.00119143	-0.00573525	-0.0177633	-0.00729767	-0.0127901	-0.0246128	-0.01026	-0.0182516	-0.00534511	-0.00263369
0.231	0.0110271	0.0152227	-0.000981415	-0.00725004	-0.0169128	-0.0086243	-0.0124027	-0.0271932	-0.0101352	-0.0182727	-0.00528546	-0.00266828
0.232	0.0104456	0.0157158	-0.000862874	-0.00838035	-0.0160704	-0.0102262	-0.0118847	-0.0292595	-0.00976833	-0.0181361	-0.00525794	-0.00297003
0.233	0.0102522	0.016423	-0.00088486	-0.0091956	-0.0155455	-0.0118575	-0.0112502	-0.030435	-0.00914348	-0.0180154	-0.00547996	-0.00362182
0.234	0.0104674	0.017104	-0.000980177	-0.00974154	-0.0154904	-0.0133417	-0.0104263	-0.0304457	-0.00818703	-0.0179707	-0.00605425	-0.00479373
0.235	0.0110677	0.0174602	-0.00097175	-0.00998123	-0.0159058	-0.0145631	-0.0093856	-0.0292512	-0.00704482	-0.0179913	-0.00685285	-0.00643099
0.236	0.0118974	0.0174233	-0.000742621	-0.00987905	-0.0166746	-0.0153637	-0.00834405	-0.0269607	-0.00604905	-0.0181065	-0.00768137	-0.00821916
0.237	0.0128086	0.0171292	-0.000328387	-0.00933157	-0.0177171	-0.0156388	-0.00763657	-0.0236969	-0.00544997	-0.0183573	-0.0084796	-0.00976299
0.238	0.0137201	0.016747	0.000162073	-0.00813128	-0.0190294	-0.0154521	-0.00747917	-0.0197834	-0.00518607	-0.0187376	-0.00917155	-0.0108087
0.239	0.0145453	0.0163874	0.000612258	-0.00619864	-0.0205391	-0.0149599	-0.00794583	-0.0158809	-0.00501574	-0.0191625	-0.00958584	-0.0112272
0.24	0.0151938	0.016085	0.000977326	-0.00373457	-0.0221127	-0.0143235	-0.00902527	-0.0126737	-0.00487558	-0.019438	-0.0096591	-0.0109767
0.241	0.0156151	0.0157949	0.00131396	-0.00104487	-0.0237043	-0.013663	-0.0105854	-0.0104105	-0.00484921	-0.0192864	-0.0094868	-0.0102897
0.242	0.0158477	0.015428	0.00165205	0.00165926	-0.0253314	-0.013061	-0.0123368	-0.00885341	-0.00483717	-0.0185398	-0.00921962	-0.00962684
0.243	0.0159687	0.0149668	0.00193298	0.00425251	-0.026909	-0.01263	-0.013882	-0.00764701	-0.00456702	-0.0172323	-0.00902685	-0.00926743
0.244	0.0160169	0.0145031	0.00215263	0.00663041	-0.0282586	-0.0124835	-0.0149052	-0.0066124	-0.00400874	-0.0154766	-0.00903361	-0.0091097
0.245	0.0160474	0.014104	0.00243749	0.0086891	-0.0292258	-0.0126801	-0.0153702	-0.00575124	-0.00345656	-0.0133972	-0.00928684	-0.00897999
0.246	0.0161354	0.0137727	0.00285794	0.0102911	-0.0296428	-0.0132445	-0.0154144	-0.00513112	-0.00318241	-0.0110634	-0.00982038	-0.00888849
0.247	0.0162596	0.0135647	0.00331262	0.0112584	-0.0293226	-0.0141197	-0.0150928	-0.00485115	-0.00329247	-0.00850077	-0.010591	-0.00888192
0.248	0.0162936	0.0136012	0.00369185	0.0114672	-0.0282391	-0.0151653	-0.0143843	-0.00495053	-0.00375936	-0.00582067	-0.0114521	-0.00895906
0.249	0.0161412	0.0139165	0.00402355	0.0109305	-0.0265842	-0.0162704	-0.0133647	-0.00528961	-0.00447634	-0.00316025	-0.0122713	-0.00917265
0.25	0.0158018	0.0143991	0.00438407	0.00979773	-0.0246341	-0.0174126	-0.0122139	-0.00569115	-0.00536216	-0.000610919	-0.0129131	-0.00963078
0.251	0.0153045	0.0149006	0.00479071	0.00829187	-0.0226839	-0.0185741	-0.011105	-0.00602834	-0.00629703	0.0016681	-0.0132001	-0.0103252
0.252	0.0146202	0.0152612	0.00529242	0.00664635	-0.0210131	-0.0196276	-0.0101355	-0.00612011	-0.00702279	0.00345383	-0.0130309	-0.0110191
0.253	0.0137042	0.0153662	0.00595356	0.00509034	-0.0198123	-0.020403	-0.00935366	-0.00583092	-0.00731007	0.00461581	-0.0124652	-0.0114115
0.254	0.0125519	0.0152638	0.00670139	0.00378087	-0.01914	-0.0207554	-0.00884801	-0.00525379	-0.00707448	0.00517868	-0.0116417	-0.0113333
0.255	0.0111642	0.0150508	0.00739067	0.00279122	-0.0189309	-0.0205645	-0.00875098	-0.00466392	-0.00619939	0.00527126	-0.0106808	-0.0107523
0.256	0.00964238	0.0147616	0.00788433	0.00219562	-0.0190226	-0.0198806	-0.00914666	-0.00430438	-0.00450032	0.0050824	-0.00967257	-0.00970327
0.257	0.00826343	0.0143834	0.00801729	0.002009	-0.0191976	-0.0189385	-0.00996357	-0.00422639	-0.00202587	0.00479922	-0.00874635	-0.00822174
0.258	0.0073389	0.0138601	0.00765125	0.00204822	-0.0192876	-0.0179049	-0.0109772	-0.00435092	0.000652214	0.00450363	-0.00808848	-0.00639355
0.259	0.00706487	0.0132046	0.00678469	0.00205526	-0.0192533	-0.0168347	-0.0119849	-0.00457989	0.00273404	0.00419974	-0.00777718	-0.00444944
0.26	0.00749019	0.0125416	0.0055782	0.00194499	-0.019143	-0.0158459	-0.0128746	-0.00472726	0.00393688	0.00392006	-0.00773335	-0.0025766
0.261	0.00849241	0.0120057	0.00425379	0.0017865	-0.0189988	-0.015076	-0.0135304	-0.00455395	0.00454426	0.0036888	-0.00787615	-0.000720122
0.262	0.00976508	0.0116969	0.00300203	0.00167101	-0.018781	-0.0145497	-0.0138219	-0.00410551	0.00474369	0.00347336	-0.00816735	0.00120805
0.263	0.0109979	0.0116487	0.00192509	0.00166981	-0.0183651	-0.0142777	-0.0136706	-0.00369737	0.00451177	0.00323712	-0.00859677	0.0031044
0.264	0.0121061	0.0118523	0.00103442	0.00179435	-0.0176143	-0.014334	-0.0130866	-0.00343122	0.00404726	0.00293564	-0.00915995	0.00475972
0.265	0.0131721	0.0123603	0.000394442	0.00196075	-0.0164371	-0.0147086	-0.0121215	-0.0032079	0.00368634	0.00248352	-0.0097828	0.00603834
0.266	0.0142282	0.0132107	0.000116458	0.00208164	-0.014803	-0.0152634	-0.0108282	-0.00312914	0.00341767	0.00180704	-0.010348	0.00695198
0.267	0.0151761	0.014273	0.000191502	0.00221357	-0.0127475	-0.0158434	-0.00930582	-0.00343446	0.00296687	0.000875968	-0.0107695	0.00754596
0.268	0.0158749	0.015369	0.000524862	0.00250021	-0.0103752	-0.016257	-0.00769876	-0.00419246	0.00231895	-0.000402779	-0.0109813	0.00774817
0.269	0.0163114	0.0163667	0.00104575	0.00296836	-0.00786553	-0.0162933	-0.00613637	-0.00528351	0.00171429	-0.00221637	-0.0108869	0.00746499
0.27	0.0166328	0.0171047	0.00166437	0.00351943	-0.00550502	-0.0159232	-0.00469181	-0.00658115	0.00125944	-0.00460563	-0.0103751	0.00672968
0.271	0.0169331	0.0175408	0.00221682	0.00406223	-0.00362475	-0.015265	-0.00341422	-0.00797862	0.000901758	-0.0073116	-0.00941403	0.00568223
0.272	0.01714	0.0178015	0.00255663	0.00448877	-0.00240562	-0.0143616	-0.00234427	-0.00925512	0.000612116	-0.00994707	-0.00811037	0.00447088
0.273	0.0172079	0.0179825	0.0026414	0.004644	-0.00189037	-0.0132456	-0.00146716	-0.0100916	0.000494407	-0.0121769	-0.00663783	0.00313236
0.274	0.0171631	0.0181267	0.00246254	0.00443408	-0.00213331	-0.0120297	-0.000773064	-0.0103692	0.000686843	-0.0137555	-0.00510145	0.00168641
0.275	0.0169361	0.0182806	0.00203668	0.00388903	-0.00315516	-0.0108299	-0.000355254	-0.0103742	0.00105055	-0.0145814	-0.00354965	0.000317061
0.276	0.0164127	0.0184345	0.0015377	0.00312322	-0.00483828	-0.00980046	-0.000287487	-0.010569	0.00117366	-0.0147271	-0.00206102	-0.000760338
0.277	0.0155656	0.018458	0.00121246	0.00220811	-0.0069919	-0.00909788	-0.000456324	-0.011291	0.000763224	-0.0143268	-0.000732928	-0.0014862
0.278	0.01444	0.0182062	0.00115056	0.00111969	-0.00947501	-0.00875566	-0.000699138	-0.0126802	-0.000166571	-0.013476	0.000318304	-0.0018926
0.279	0.0131384	0.0176673	0.0012918	-0.000106231	-0.0121143	-0.00880632	-0.0010098	-0.0146962	-0.00153139	-0.0122797	0.000999411	-0.00188995
0.28	0.0118799	0.0169009	0.00157347	-0.0013261	-0.0145839	-0.00938288	-0.00144253	-0.0172381	-0.00328468	-0.0109054	0.00134656	-0.00113871
0.281	0.0109447	0.015954	0.00198845	-0.00240283	-0.016558	-0.0105273	-0.00196648	-0.0202514	-0.00517945	-0.00953475	0.00144551	0.000596998
0.282	0.0104713	0.014942	0.00249796	-0.00323938	-0.0179247	-0.0121328	-0.00255554	-0.0235923	-0.00682557	-0.00830316	0.00129181	0.00298911
0.283	0.0103822	0.0140511	0.00299036	-0.00375644	-0.0188039	-0.0141025	-0.00330633	-0.0269334	-0.00803667	-0.00724079	0.000887488	0.00539423
0.284	0.0105237	0.0133697	0.00334545	-0.00390599	-0.0194453	-0.0163564	-0.00434178	-0.0299529	-0.00880691	-0.00625844	0.000369087	0.00729434
0.285	0.0108425	0.0128809	0.00344309	-0.00371594	-0.0200502	-0.0188057	-0.00565388	-0.0324381	-0.0089643	-0.00523201	-0.000100582	0.00834556
0.286	0.0114341	0.0126016	0.00315949	-0.00329193	-0.0206837	-0.0213755	-0.00713739	-0.034102	-0.00821199	-0.00412153	-0.000497027	0.00843648
0.287	0.0124536	0.0124968	0.00245721	-0.00278322	-0.0213286	-0.0238577	-0.0086567	-0.0345316	-0.00661331	-0.00300927	-0.00084851	0.00773116
0.288	0.0139025	0.012383	0.00147397	-0.00229614	-0.0218853	-0.0258927	-0.0100442	-0.0334865	-0.00465221	-0.00190595	-0.00103875	0.0064849
0.289	0.0155017	0.0121477	0.00038064	-0.00178857	-0.0222002	-0.0272471	-0.0112073	-0.031069	-0.00272109	-0.000594276	-0.000934601	0.00494271
0.29	0.0169457	0.0118602	-0.000750755	-0.00111971	-0.0221541	-0.0279566	-0.0121704	-0.0274972	-0.000840567	0.00122286	-0.000584835	0.00337708
0.291	0.0181849	0.0116226	-0.00189483	-0.000155887	-0.0216704	-0.0282547	-0.0130025	-0.0229224	0.00104129	0.00388127	-0.000126781	0.00203151
0.292	0.0193284	0.0114843	-0.00302831	0.00130021	-0.0206643	-0.0283806	-0.0138682	-0.0175188	0.00273847	0.00784981	0.000256356	0.00103342
0.293	0.0203726	0.0114135	-0.00405857	0.00360789	-0.0191031	-0.0284561	-0.014941	-0.0114202	0.0040157	0.0136816	0.000379701	0.000397367
0.294	0.0211313	0.0113341	-0.00484882	0.00725896	-0.0171099	-0.0286211	-0.0161572	-0.00442723	0.00490771	0.0219898	0.000158583	9.7e-05
0.295	0.0214673	0.0112345	-0.00534031	0.0128438	-0.0148621	-0.0290303	-0.0172876	0.00394079	0.00568206	0.0334309	-0.000459564	8.75e-05
0.296	0.021471	0.0111836	-0.00551957	0.0209104	-0.0124593	-0.0296643	-0.0182178	0.0141362	0.00649379	0.0484381	-0.00148655	0.000224743
0.297	0.0213426	0.0112608	-0.00532138	0.0316865	-0.0099203	-0.0303572	-0.0189219	0.0265336	0.00731661	0.0669044	-0.00269098	0.000294588
0.298	0.0212424	0.0115519	-0.00465205	0.0449441	-0.00727695	-0.0309709	-0.0192673	0.0412575	0.00844825	0.0881924	-0.00348804	0.00015
0.299	0.0212321	0.0121595	-0.00348906	0.0600826	-0.00471756	-0.0314799	-0.0190799	0.0577895	0.0106365	0.111233	-0.00327442	-0.00028455
0.3	0.021281	0.0131144	-0.00193609	0.0762404	-0.00242727	-0.0318915	-0.0182914	0.0749938	0.0145586	0.134668	-0.00182967	-0.00103332
0.301	0.0213896	0.014331	-0.000166417	0.0924472	-0.000166966	-0.0321171	-0.016987	0.0916071	0.0208522	0.157301	0.000789909	-0.00200888
0.302	0.0216434	0.015667	0.00167598	0.107911	0.0027662	-0.031993	-0.0154226	0.10681	0.030421	0.178484	0.00443863	-0.00300077
0.303	0.0222176	0.0170107	0.0034952	0.122264	0.00709331	-0.0314449	-0.0139127	0.120525	0.0439132	0.19826	0.00883043	-0.00371673
0.304	0.0235366	0.0183369	0.00521593	0.13577	0.0132236	-0.0305218	-0.0126449	0.133303	0.0611903	0.21745	0.0135816	-0.00391477
0.305	0.0262934	0.0197071	0.00677888	0.149368	0.0212593	-0.0292736	-0.0116716	0.146171	0.0816702	0.237454	0.0183884	-0.00346121
0.306	0.0312228	0.0212052	0.0081375	0.164263	0.030985	-0.0277665	-0.0109443	0.160531	0.104713	0.259791	0.0230368	-0.00205837
0.307	0.0389292	0.0227829	0.00925941	0.181455	0.0419142	-0.0261018	-0.0101958	0.177744	0.129496	0.285737	0.0272968	0.000923038
0.308	0.0496352	0.0242826	0.0101369	0.201496	0.0534719	-0.0242824	-0.00906773	0.198771	0.155124	0.316063	0.0310257	0.00623005
0.309	0.0629173	0.0256772	0.0108045	0.224567	0.0650919	-0.0221589	-0.00743948	0.224215	0.181174	0.351025	0.0343836	0.0144439
0.31	0.0778841	0.0271372	0.0114149	0.250571	0.0763576	-0.0195389	-0.00525597	0.25427	0.207874	0.390548	0.0378599	0.025779
0.311	0.0936237	0.0289841	0.0123386	0.27907	0.0871218	-0.0162113	-0.00206693	0.288551	0.235819	0.434231	0.0421832	0.0400535
0.312	0.109411	0.0316591	0.0141373	0.309343	0.0974751	-0.0117675	0.00292569	0.326245	0.265816	0.481234	0.0483023	0.0567647
0.313	0.124716	0.0356151	0.0174485	0.340632	0.107753	-0.00563811	0.0105409	0.366439	0.29879	0.530369	0.057239	0.0750178
0.314	0.139318	0.0412383	0.0229254	0.372331	0.118635	0.00250567	0.0214153	0.408216	0.335441	0.580334	0.0696918	0.0935839
0.315	0.153484	0.0487667	0.0311057	0.40401	0.131103	0.0125261	0.0357022	0.450553	0.375774	0.629908	0.0857612	0.111433
0.316	0.167986	0.0581358	0.0421757	0.435396	0.146134	0.0239531	0.0529577	0.492323	0.419048	0.678037	0.104913	0.12816
0.317	0.183936	0.0689638	0.0558208	0.466353	0.164432	0.0361635	0.0723225	0.532447	0.46437	0.723761	0.126012	0.143978
0.318	0.202542	0.0806702	0.0712102	0.496781	0.18638	0.0485696	0.0926172	0.569909	0.511122	0.766303	0.147573	0.159676
0.319	0.224832	0.0927077	0.0872177	0.526493	0.211921	0.0608366	0.112471	0.603616	0.558711	0.805264	0.168283	0.176471
0.32	0.251471	0.105126	0.10283	0.555226	0.240495	0.0727792	0.130646	0.632601	0.606321	0.840637	0.187367	0.195627
0.321	0.282727	0.118893	0.117491	0.582651	0.271261	0.0842056	0.146425	0.656482	0.653109	0.872636	0.20461	0.218172
0.322	0.318449	0.1354	0.131259	0.608311	0.303303	0.0952767	0.159931	0.675409	0.69841	0.901401	0.220411	0.244782
0.323	0.358195	0.155792	0.144684	0.631705	0.335667	0.106722	0.172204	0.689665	0.741629	0.926918	0.235906	0.275742
0.324	0.401565	0.180607	0.158567	0.65242	0.367463	0.119499	0.184853	0.699603	0.782245	0.949221	0.252804	0.310993
0.325	0.448447	0.209636	0.173807	0.670173	0.397973	0.134567	0.199565	0.705696	0.820024	0.968327	0.272887	0.350256
0.326	0.498975	0.242081	0.191257	0.684823	0.426717	0.152769	0.217787	0.708345	0.854823	0.983987	0.297513	0.393086
0.327	0.553481	0.276887	0.211489	0.69637	0.45347	0.174599	0.24043	0.707732	0.886122	0.995497	0.327393	0.438777
0.328	0.612449	0.312944	0.234654	0.704691	0.478239	0.200139	0.267679	0.703723	0.913187	1.00126	0.362552	0.4863
0.329	0.676164	0.349244	0.260545	0.709125	0.501275	0.229102	0.299148	0.695627	0.935735	0.998116	0.402331	0.534451
0.33	0.744322	0.385045	0.288716	0.708187	0.522924	0.260873	0.334054	0.681938	0.953965	0.981079	0.445584	0.581965
0.331	0.816015	0.419978	0.318586	0.699347	0.543345	0.294625	0.371254	0.660209	0.967816	0.944416	0.49103	0.627471
0.332	0.889778	0.454111	0.349492	0.679322	0.562426	0.329419	0.409488	0.627473	0.976666	0.883542	0.537498	0.66965
0.333	0.963621	0.487845	0.380806	0.645282	0.57993	0.364291	0.447713	0.581403	0.97978	0.796572	0.583911	0.707582
0.334	1.03534	0.521817	0.412143	0.596174	0.59559	0.398378	0.485089	0.521464	0.976136	0.685039	0.629311	0.740842
0.335	1.10302	0.556932	0.443359	0.533183	0.60909	0.430978	0.520855	0.449229	0.963375	0.553754	0.673085	0.769351
0.336	1.1654	0.594207	0.474422	0.459339	0.619971	0.461506	0.554307	0.368042	0.937224	0.409939	0.714818	0.793283
0.337	1.22222	0.634396	0.50543	0.378808	0.627463	0.489442	0.584744	0.282409	0.89223	0.261954	0.754023	0.813
0.338	1.27405	0.677775	0.536593	0.296121	0.630226	0.514406	0.611639	0.197109	0.823501	0.117899	0.790235	0.828878
0.339	1.3216	0.724221	0.568081	0.215462	0.626066	0.536317	0.634874	0.116171	0.728769	-0.0155793	0.823011	0.841183
0.34	1.36453	0.773273	0.599871	0.140084	0.611829	0.555367	0.65464	0.0422439	0.609754	-0.134097	0.851903	0.85007
0.341	1.4002	0.824099	0.631725	0.0720083	0.584221	0.571843	0.671318	-0.023423	0.471896	-0.23593	0.876674	0.855498
0.342	1.42316	0.875603	0.663258	0.012001	0.541358	0.585973	0.685443	-0.0809272	0.322896	-0.321947	0.897264	0.856691
0.343	1.42649	0.926684	0.694025	-0.0402556	0.483583	0.597841	0.697482	-0.131775	0.17118	-0.394992	0.913517	0.851392
0.344	1.40393	0.976459	0.723534	-0.0859713	0.413301	0.6074	0.70766	-0.178682	0.0247936	-0.458767	0.925111	0.835741
0.345	1.35141	1.02428	0.751326	-0.127092	0.334475	0.614497	0.715898	-0.224827	-0.109498	-0.516668	0.931539	0.805257
0.346	1.26769	1.06963	0.777097	-0.166047	0.251796	0.61871	0.721592	-0.272706	-0.227329	-0.571114	0.931828	0.756566
0.347	1.15442	1.11171	0.800613	-0.205261	0.169789	0.619101	0.72323	-0.323437	-0.327475	-0.623203	0.923962	0.688793
0.348	1.01563	1.14855	0.821386	-0.246555	0.0922734	0.61399	0.717881	-0.376722	-0.411299	-0.672561	0.904502	0.603792
0.349	0.857099	1.17632	0.838002	-0.290678	0.021876	0.600835	0.701233	-0.430886	-0.481549	-0.717725	0.86926	0.505681
0.35	0.685819	1.18961	0.847504	-0.337335	-0.0403598	0.576674	0.668875	-0.483227	-0.541601	-0.75681	0.81494	0.40009
0.351	0.509199	1.18282	0.845803	-0.385589	-0.0948762	0.539256	0.617942	-0.53085	-0.594867	-0.787873	0.740576	0.293042
0.352	0.333993	1.15187	0.828995	-0.434023	-0.143199	0.488065	0.548017	-0.571202	-0.643924	-0.809154	0.647951	0.189864
0.353	0.165441	1.09526	0.794686	-0.480845	-0.187412	0.424627	0.461365	-0.60226	-0.689771	-0.81943	0.541143	0.0944666
0.354	0.00714662	1.01432	0.742772	-0.524236	-0.229545	0.352091	0.362583	-0.622789	-0.731734	-0.818277	0.425765	0.00895246
0.355	-0.138651	0.912806	0.675378	-0.562726	-0.271038	0.274437	0.257616	-0.632448	-0.768017	-0.806125	0.307899	-0.0664412
0.356	-0.270908	0.795906	0.596182	-0.595336	-0.312439	0.195787	0.152515	-0.631719	-0.796522	-0.784091	0.19297	-0.133135
0.357	-0.389585	0.669272	0.509548	-0.621601	-0.353426	0.119801	0.0525922	-0.621802	-0.815442	-0.753735	0.0850193	-0.19382
0.358	-0.495214	0.538271	0.41967	-0.641584	-0.393157	0.0491114	-0.0380606	-0.604361	-0.823407	-0.716922	-0.0136822	-0.251644
0.359	-0.588438	0.407502	0.32999	-0.655779	-0.430648	-0.0150473	-0.117118	-0.58121	-0.819654	-0.675753	-0.102761	-0.30916
0.36	-0.669784	0.280413	0.242891	-0.664901	-0.464876	-0.0729075	-0.184339	-0.554184	-0.804318	-0.632323	-0.183503	-0.367634
0.361	-0.739519	0.159074	0.159572	-0.669759	-0.49481	-0.125817	-0.241301	-0.525142	-0.778503	-0.588447	-0.258312	-0.426804
0.362	-0.79761	0.0443718	0.0801687	-0.671305	-0.519586	-0.175583	-0.290724	-0.495824	-0.744073	-0.545717	-0.329787	-0.485091
0.363	-0.84386	-0.0635389	0.00402815	-0.670586	-0.5387	-0.223804	-0.335417	-0.467591	-0.703233	-0.505519	-0.399719	-0.540212
0.364	-0.878156	-0.164873	-0.0699351	-0.668498	-0.552217	-0.271418	-0.377392	-0.441439	-0.658118	-0.46887	-0.46863	-0.589633
0.365	-0.900513	-0.259853	-0.14265	-0.665763	-0.560758	-0.318621	-0.417657	-0.418132	-0.610826	-0.43636	-0.535806	-0.630797
0.366	-0.910983	-0.348398	-0.21431	-0.663016	-0.565174	-0.36497	-0.4564	-0.398168	-0.563611	-0.408171	-0.599496	-0.661578
0.367	-0.909856	-0.430043	-0.284302	-0.660771	-0.566345	-0.409398	-0.493091	-0.381645	-0.518592	-0.384174	-0.657274	-0.68072
0.368	-0.897887	-0.504058	-0.351506	-0.659391	-0.565143	-0.450394	-0.526563	-0.368277	-0.477254	-0.364094	-0.706612	-0.687858
0.369	-0.876125	-0.569706	-0.414562	-0.659033	-0.562412	-0.486348	-0.555318	-0.357656	-0.44038	-0.347551	-0.745359	-0.683378
0.37	-0.845859	-0.626478	-0.472071	-0.65961	-0.558974	-0.515824	-0.577968	-0.349383	-0.408225	-0.334018	-0.771996	-0.668323
0.371	-0.808707	-0.674105	-0.522825	-0.660834	-0.555568	-0.53792	-0.593601	-0.34296	-0.380789	-0.322864	-0.785865	-0.644266
0.372	-0.766394	-0.712476	-0.566006	-0.662393	-0.552742	-0.552458	-0.601933	-0.33789	-0.358026	-0.313502	-0.787164	-0.613135
0.373	-0.720498	-0.741637	-0.601265	-0.664003	-0.550808	-0.559843	-0.603161	-0.333892	-0.339672	-0.305449	-0.776729	-0.577038
0.374	-0.672463	-0.761883	-0.628684	-0.665373	-0.549931	-0.560984	-0.597796	-0.3308	-0.325114	-0.298321	-0.755962	-0.538048
0.375	-0.623665	-0.773847	-0.648712	-0.666259	-0.550199	-0.55714	-0.586712	-0.328356	-0.313644	-0.29182	-0.726791	-0.498108
0.376	-0.57539	-0.778369	-0.66215	-0.66641	-0.551548	-0.549627	-0.571165	-0.326242	-0.304658	-0.285657	-0.691413	-0.459004
0.377	-0.528714	-0.776376	-0.670103	-0.665564	-0.553729	-0.5397	-0.552636	-0.324169	-0.297622	-0.279552	-0.652056	-0.422221
0.378	-0.484403	-0.768927	-0.673851	-0.663641	-0.556349	-0.528485	-0.532647	-0.321881	-0.29201	-0.273365	-0.610818	-0.388783
0.379	-0.443033	-0.757178	-0.674615	-0.660739	-0.558991	-0.516938	-0.512487	-0.319189	-0.287301	-0.267138	-0.569462	-0.359234
0.38	-0.405109	-0.74231	-0.673355	-0.656938	-0.56132	-0.505933	-0.493016	-0.315948	-0.283052	-0.260978	-0.529408	-0.333825
0.381	-0.370858	-0.725415	-0.670801	-0.652295	-0.563111	-0.4962	-0.474862	-0.312106	-0.279058	-0.254928	-0.491796	-0.312622
0.382	-0.340199	-0.707295	-0.667614	-0.646899	-0.564232	-0.488194	-0.45854	-0.307764	-0.275308	-0.248995	-0.457436	-0.295439
0.383	-0.312995	-0.688486	-0.664386	-0.640853	-0.564661	-0.482136	-0.444343	-0.302994	-0.271733	-0.243146	-0.426839	-0.28189
0.384	-0.289057	-0.669459	-0.661536	-0.634248	-0.564457	-0.478027	-0.432388	-0.297742	-0.268103	-0.237242	-0.400209	-0.271426
0.385	-0.268059	-0.650688	-0.65929	-0.627181	-0.563688	-0.475592	-0.422697	-0.292065	-0.2642	-0.231225	-0.377435	-0.263346
0.386	-0.249616	-0.632611	-0.657738	-0.619804	-0.562459	-0.474321	-0.415143	-0.286143	-0.259958	-0.225332	-0.358217	-0.256939
0.387	-0.23334	-0.615584	-0.65691	-0.612244	-0.560941	-0.473643	-0.409444	-0.280044	-0.255433	-0.219882	-0.34212	-0.251545
0.388	-0.218915	-0.59981	-0.656763	-0.604531	-0.559243	-0.473069	-0.40521	-0.27378	-0.250665	-0.214996	-0.328594	-0.246591
0.389	-0.206098	-0.585379	-0.657141	-0.596677	-0.557313	-0.472269	-0.401956	-0.267483	-0.245581	-0.210641	-0.31706	-0.241659
0.39	-0.194615	-0.572293	-0.65786	-0.588669	-0.554952	-0.471137	-0.399213	-0.261294	-0.240122	-0.206731	-0.307034	-0.23654
0.391	-0.184179	-0.560362	-0.658781	-0.58047	-0.551964	-0.469725	-0.396716	-0.255365	-0.2344	-0.203097	-0.298163	-0.231276
0.392	-0.174626	-0.549252	-0.65977	-0.572126	-0.548291	-0.468073	-0.394412	-0.249944	-0.228599	-0.199486	-0.290231	-0.225986
0.393	-0.165949	-0.538727	-0.66068	-0.563786	-0.543995	-0.466132	-0.392231	-0.245123	-0.222876	-0.195679	-0.283097	-0.220649
0.394	-0.158088	-0.528747	-0.661315	-0.555596	-0.539112	-0.463817	-0.390006	-0.240712	-0.217354	-0.191622	-0.276649	-0.215221
0.395	-0.150817	-0.519331	-0.661369	-0.547667	-0.533562	-0.461153	-0.387551	-0.23648	-0.212071	-0.187398	-0.270828	-0.209824
0.396	-0.143936	-0.51043	-0.66055	-0.540066	-0.527339	-0.458277	-0.384757	-0.232342	-0.206841	-0.183149	-0.265588	-0.204656
0.397	-0.137395	-0.501895	-0.658784	-0.532695	-0.520624	-0.455268	-0.381599	-0.228382	-0.201264	-0.17903	-0.260761	-0.199848
0.398	-0.131265	-0.49359	-0.656164	-0.525332	-0.513576	-0.45202	-0.378049	-0.224715	-0.194968	-0.175137	-0.25608	-0.195447
0.399	-0.125631	-0.485536	-0.652789	-0.517847	-0.506282	-0.44834	-0.374049	-0.221328	-0.18785	-0.171482	-0.251324	-0.191349
0.4	-0.120461	-0.477836	-0.648711	-0.510213	-0.498845	-0.444145	-0.369518	-0.218115	-0.18015	-0.168079	-0.24636	-0.187328
0.401	-0.115622	-0.470545	-0.643984	-0.502371	-0.491325	-0.439522	-0.364379	-0.21496	-0.172369	-0.164937	-0.241093	-0.18327
0.402	-0.111092	-0.463609	-0.638603	-0.494201	-0.483758	-0.434506	-0.358716	-0.211807	-0.165171	-0.161971	-0.235479	-0.179203
0.403	-0.107002	-0.456884	-0.632517	-0.48562	-0.476222	-0.428992	-0.352784	-0.208633	-0.159242	-0.159092	-0.229524	-0.175189
0.404	-0.103464	-0.450176	-0.625791	-0.476668	-0.46875	-0.422953	-0.34684	-0.205369	-0.154894	-0.156374	-0.223312	-0.171331
0.405	-0.100429	-0.443326	-0.61862	-0.467558	-0.461316	-0.416517	-0.341081	-0.201931	-0.151993	-0.153938	-0.217075	-0.167673
0.406	-0.0977281	-0.436319	-0.611227	-0.45862	-0.453918	-0.409835	-0.33564	-0.198286	-0.15031	-0.151775	-0.211159	-0.164191
0.407	-0.0952267	-0.42927	-0.603777	-0.450073	-0.446642	-0.403104	-0.330549	-0.194546	-0.14972	-0.149708	-0.205849	-0.160887
0.408	-0.0928401	-0.422332	-0.596299	-0.441881	-0.439604	-0.396574	-0.325761	-0.190898	-0.150046	-0.147483	-0.201276	-0.157787
0.409	-0.0904299	-0.415662	-0.588748	-0.43382	-0.432764	-0.390331	-0.321196	-0.187431	-0.150824	-0.145005	-0.197405	-0.154843
0.41	-0.0878524	-0.409283	-0.581079	-0.425592	-0.425951	-0.384293	-0.316787	-0.184105	-0.15148	-0.142343	-0.194032	-0.151961
0.411	-0.0850877	-0.403061	-0.5732	-0.417009	-0.419065	-0.37843	-0.312513	-0.180823	-0.151726	-0.139526	-0.190918	-0.149057
0.412	-0.082196	-0.396897	-0.565003	-0.408121	-0.412142	-0.372806	-0.30833	-0.177584	-0.151615	-0.13655	-0.18795	-0.146059
0.413	-0.0792381	-0.390759	-0.556478	-0.399107	-0.405298	-0.36743	-0.304128	-0.174548	-0.151184	-0.133506	-0.185048	-0.143004
0.414	-0.0763645	-0.384547	-0.547641	-0.390124	-0.398602	-0.362198	-0.299795	-0.171801	-0.150233	-0.130587	-0.182118	-0.140014
0.415	-0.073825	-0.378111	-0.538438	-0.381272	-0.392041	-0.356965	-0.295281	-0.169267	-0.148583	-0.127957	-0.179107	-0.137191
0.416	-0.0717036	-0.371369	-0.528895	-0.372583	-0.385551	-0.351596	-0.290543	-0.166883	-0.146375	-0.12565	-0.175981	-0.134628
0.417	-0.0698568	-0.364402	-0.519178	-0.364121	-0.379013	-0.346106	-0.285576	-0.164556	-0.143911	-0.123636	-0.172682	-0.132329
0.418	-0.0682106	-0.357434	-0.509512	-0.356082	-0.372355	-0.340686	-0.280436	-0.162077	-0.141306	-0.121912	-0.169155	-0.130167
0.419	-0.066766	-0.350611	-0.50012	-0.348652	-0.365634	-0.335437	-0.275192	-0.159269	-0.138496	-0.120417	-0.165453	-0.127962
0.42	-0.0654045	-0.34389	-0.491116	-0.341875	-0.358952	-0.330257	-0.269985	-0.156128	-0.135407	-0.118972	-0.161769	-0.125431
0.421	-0.0639505	-0.337196	-0.482442	-0.335728	-0.352436	-0.324953	-0.264996	-0.152751	-0.131983	-0.117452	-0.1583	-0.122137
0.422	-0.062305	-0.330557	-0.474	-0.330204	-0.346221	-0.319346	-0.260216	-0.14922	-0.128174	-0.11587	-0.15518	-0.117816
0.423	-0.0605383	-0.324086	-0.465746	-0.325204	-0.340393	-0.31345	-0.255478	-0.145606	-0.123995	-0.11424	-0.152469	-0.11267
0.424	-0.0588449	-0.317903	-0.457628	-0.32057	-0.334932	-0.307529	-0.250736	-0.14202	-0.119633	-0.11257	-0.150051	-0.107138
0.425	-0.0573355	-0.312057	-0.449613	-0.316251	-0.329699	-0.301838	-0.246085	-0.138582	-0.115444	-0.110876	-0.147723	-0.101656
0.426	-0.0559352	-0.306537	-0.441784	-0.3123	-0.324549	-0.296382	-0.241599	-0.135339	-0.111634	-0.109108	-0.14548	-0.0966983
0.427	-0.0545296	-0.301247	-0.434217	-0.308732	-0.319398	-0.291079	-0.237215	-0.132277	-0.108244	-0.10725	-0.143413	-0.0926682
0.428	-0.053176	-0.295941	-0.426896	-0.305432	-0.314149	-0.285973	-0.232775	-0.12948	-0.105539	-0.105375	-0.14138	-0.0897933
0.429	-0.0520179	-0.290417	-0.419737	-0.302208	-0.308725	-0.281097	-0.22824	-0.127096	-0.103829	-0.10349	-0.139185	-0.0882237
0.43	-0.0510288	-0.284707	-0.412662	-0.29893	-0.303169	-0.276437	-0.223788	-0.125098	-0.102928	-0.101533	-0.13685	-0.0879883
0.431	-0.0500471	-0.278903	-0.405713	-0.29553	-0.297527	-0.271991	-0.219604	-0.123273	-0.102252	-0.0995111	-0.134476	-0.0888469
0.432	-0.0489938	-0.273041	-0.398904	-0.2919	-0.291809	-0.267727	-0.215626	-0.121424	-0.101384	-0.0975131	-0.13213	-0.0904009
0.433	-0.0479198	-0.267203	-0.392036	-0.287953	-0.286088	-0.263542	-0.211719	-0.119448	-0.100284	-0.0956335	-0.129868	-0.0923085
0.434	-0.0469172	-0.261498	-0.384891	-0.283697	-0.280485	-0.259311	-0.207893	-0.11733	-0.0990556	-0.0938834	-0.127722	-0.0942517
0.435	-0.0460371	-0.255923	-0.377422	-0.279146	-0.275056	-0.254948	-0.204189	-0.115094	-0.0976504	-0.0921223	-0.125672	-0.0958709
0.436	-0.0452261	-0.250455	-0.369716	-0.274189	-0.26979	-0.250434	-0.200591	-0.112792	-0.0958487	-0.0902029	-0.123719	-0.0969258
0.437	-0.044332	-0.245166	-0.361953	-0.268624	-0.264728	-0.245804	-0.19711	-0.110445	-0.0935844	-0.08815	-0.1219	-0.0973769
0.438	-0.0432321	-0.240073	-0.354305	-0.262448	-0.259939	-0.241092	-0.193778	-0.107983	-0.0911219	-0.0860236	-0.120116	-0.0972778
0.439	-0.0418552	-0.235079	-0.346866	-0.255935	-0.255375	-0.236258	-0.190601	-0.105363	-0.0888184	-0.0838301	-0.118142	-0.0966635
0.44	-0.0401737	-0.230137	-0.33967	-0.249373	-0.250941	-0.231215	-0.18757	-0.102588	-0.0868998	-0.0815958	-0.115884	-0.0955327
0.441	-0.0383636	-0.225313	-0.33272	-0.242935	-0.246628	-0.225976	-0.184542	-0.0996246	-0.0854013	-0.079333	-0.113458	-0.0939032
0.442	-0.0366739	-0.220626	-0.326027	-0.236709	-0.242433	-0.220727	-0.1813	-0.0965328	-0.0842016	-0.0770786	-0.111062	-0.0918524
0.443	-0.0351272	-0.215947	-0.319612	-0.230716	-0.238242	-0.215606	-0.177818	-0.09356	-0.0832164	-0.0749626	-0.108788	-0.0895075
0.444	-0.0336596	-0.211136	-0.313452	-0.224914	-0.233838	-0.210613	-0.174206	-0.0909457	-0.0825127	-0.073088	-0.106627	-0.0869378
0.445	-0.032305	-0.206198	-0.307429	-0.219249	-0.229045	-0.205816	-0.170577	-0.088719	-0.0820899	-0.0714618	-0.104689	-0.0842036
0.446	-0.0310495	-0.201249	-0.301418	-0.213711	-0.223888	-0.201376	-0.167102	-0.0867507	-0.0817942	-0.0700732	-0.103171	-0.0815555
0.447	-0.0297427	-0.196371	-0.295416	-0.208304	-0.218558	-0.197409	-0.163943	-0.0849423	-0.0815185	-0.0688872	-0.102073	-0.0793612
0.448	-0.0282679	-0.191564	-0.289477	-0.203042	-0.213217	-0.193972	-0.16111	-0.0832138	-0.0811505	-0.0678485	-0.101233	-0.0778283
0.449	-0.0267197	-0.186812	-0.283593	-0.198005	-0.207889	-0.191068	-0.15845	-0.0813968	-0.0804485	-0.0669909	-0.100495	-0.0768437
0.45	-0.0253343	-0.182149	-0.277732	-0.193304	-0.202493	-0.188575	-0.155642	-0.079393	-0.0791825	-0.0663241	-0.0997462	-0.0761374
0.451	-0.0242846	-0.177675	-0.271905	-0.188968	-0.197049	-0.186199	-0.15238	-0.0773399	-0.0773505	-0.0656955	-0.0989276	-0.0755409
0.452	-0.0236048	-0.173488	-0.266092	-0.184951	-0.191794	-0.183596	-0.148646	-0.0754608	-0.0753211	-0.0650258	-0.098019	-0.0749194
0.453	-0.0231644	-0.169608	-0.260233	-0.181278	-0.186981	-0.180547	-0.144592	-0.073906	-0.0736448	-0.06446	-0.096943	-0.0740858
0.454	-0.0226728	-0.16598	-0.254333	-0.178086	-0.182682	-0.177046	-0.14036	-0.072729	-0.0725946	-0.0641262	-0.0956209	-0.0729481
0.455	-0.0218973	-0.162506	-0.248409	-0.175505	-0.178873	-0.173251	-0.136214	-0.0718646	-0.0720195	-0.063984	-0.0940415	-0.0715319
0.456	-0.0208334	-0.159053	-0.24244	-0.173526	-0.175539	-0.169396	-0.132501	-0.071138	-0.0716297	-0.0639377	-0.0921704	-0.0698918
0.457	-0.019579	-0.155511	-0.236478	-0.171955	-0.172676	-0.165662	-0.12942	-0.0703472	-0.0712365	-0.0638359	-0.0899872	-0.068088
0.458	-0.0181636	-0.151851	-0.230629	-0.170635	-0.170249	-0.162101	-0.126987	-0.069386	-0.0707381	-0.0634492	-0.0875883	-0.0661243
0.459	-0.0165501	-0.148085	-0.224967	-0.169578	-0.168118	-0.158606	-0.125104	-0.0683206	-0.0700949	-0.0626843	-0.0851099	-0.06397
0.46	-0.014713	-0.144152	-0.219523	-0.16878	-0.166109	-0.154989	-0.123484	-0.0673653	-0.0693425	-0.0616713	-0.0826445	-0.0616991
0.461	-0.0127185	-0.139911	-0.214276	-0.168166	-0.164139	-0.151166	-0.121722	-0.0667116	-0.0685098	-0.0606357	-0.0802673	-0.0594638
0.462	-0.0107177	-0.135256	-0.209174	-0.167588	-0.162194	-0.147238	-0.119578	-0.0663952	-0.0675906	-0.0597986	-0.0780688	-0.0574216
0.463	-0.00884153	-0.130187	-0.204164	-0.166862	-0.160209	-0.143442	-0.117033	-0.0664082	-0.0666479	-0.0592186	-0.0761131	-0.0557145
0.464	-0.00728632	-0.12478	-0.199227	-0.165857	-0.15806	-0.140044	-0.114119	-0.0668086	-0.0657549	-0.0587874	-0.0743766	-0.0543867
0.465	-0.00631904	-0.119183	-0.194411	-0.164504	-0.155683	-0.137092	-0.110923	-0.0676287	-0.0648502	-0.0584708	-0.0727764	-0.0534043
0.466	-0.00599912	-0.113569	-0.189763	-0.162864	-0.153118	-0.134366	-0.107628	-0.0687545	-0.063894	-0.0582938	-0.0712464	-0.052733
0.467	-0.00614907	-0.1081	-0.185296	-0.161189	-0.150443	-0.131664	-0.104379	-0.0699512	-0.0630606	-0.0581667	-0.0697849	-0.0523393
0.468	-0.00656337	-0.102932	-0.181024	-0.159755	-0.147727	-0.128958	-0.101239	-0.0710157	-0.0625634	-0.0579936	-0.0684193	-0.0522065
0.469	-0.00708372	-0.0981553	-0.176918	-0.158685	-0.145077	-0.126321	-0.09832	-0.0718443	-0.0623532	-0.0578628	-0.0671829	-0.0523527
0.47	-0.00762538	-0.0937779	-0.172871	-0.158007	-0.14267	-0.123783	-0.0957728	-0.0722837	-0.0621261	-0.0579886	-0.0661342	-0.052802
0.471	-0.00810936	-0.0897862	-0.168793	-0.157734	-0.14071	-0.121302	-0.0936769	-0.0721653	-0.0617022	-0.0584844	-0.0652775	-0.0535196
0.472	-0.00830929	-0.0861729	-0.164758	-0.157846	-0.139313	-0.118888	-0.0920693	-0.0715548	-0.0612326	-0.0592642	-0.0645537	-0.0543825
0.473	-0.00799437	-0.0829519	-0.160924	-0.158289	-0.138429	-0.116656	-0.0910593	-0.0706858	-0.0609181	-0.0601447	-0.0639525	-0.0551712
0.474	-0.00715911	-0.0800972	-0.157355	-0.159089	-0.137926	-0.114745	-0.0906812	-0.0697858	-0.0607485	-0.0609464	-0.0634766	-0.0556388
0.475	-0.00594547	-0.0774862	-0.154044	-0.160259	-0.137696	-0.113216	-0.090696	-0.0690191	-0.0606439	-0.0615509	-0.0630481	-0.0557417
0.476	-0.0045303	-0.0749631	-0.151025	-0.161681	-0.137651	-0.112005	-0.0907717	-0.0684103	-0.060629	-0.0619302	-0.0625476	-0.055581
0.477	-0.00312673	-0.0724548	-0.148356	-0.163251	-0.137713	-0.11098	-0.0906774	-0.0679468	-0.0607201	-0.0620353	-0.0619145	-0.0551281
0.478	-0.00189762	-0.0699638	-0.146057	-0.164934	-0.137875	-0.110037	-0.0902453	-0.0677275	-0.0608874	-0.0617826	-0.0611824	-0.0544026
0.479	-0.00083858	-0.0674361	-0.144042	-0.16667	-0.138203	-0.109133	-0.0894268	-0.0678844	-0.0611525	-0.0612959	-0.0604031	-0.0536608
0.48	0.000117528	-0.0647404	-0.142212	-0.168367	-0.138704	-0.108255	-0.0882931	-0.0684516	-0.061515	-0.060902	-0.0595733	-0.0530877
0.481	0.000927995	-0.0617295	-0.140626	-0.169983	-0.139266	-0.107399	-0.0869063	-0.0694012	-0.0618902	-0.0608266	-0.0586544	-0.0526728
0.482	0.00148601	-0.0582785	-0.139414	-0.171529	-0.139768	-0.106628	-0.0854102	-0.0707148	-0.0621159	-0.0611561	-0.0576815	-0.0524172
0.483	0.00177431	-0.0544014	-0.138518	-0.172984	-0.140194	-0.106148	-0.0840599	-0.0723068	-0.062076	-0.0619775	-0.0567878	-0.0522802
0.484	0.00186874	-0.0503267	-0.137734	-0.174314	-0.140595	-0.106159	-0.0829807	-0.0740276	-0.0619157	-0.0633294	-0.0560286	-0.0521237
0.485	0.00178931	-0.0463636	-0.136905	-0.175537	-0.141031	-0.106614	-0.082139	-0.0757923	-0.0618537	-0.0651184	-0.0553626	-0.0518771
0.486	0.00151287	-0.0426943	-0.135928	-0.176655	-0.14161	-0.107281	-0.0815489	-0.0775528	-0.0619209	-0.0672092	-0.0547853	-0.0515241
0.487	0.00108589	-0.0393691	-0.134806	-0.177609	-0.142451	-0.107952	-0.0812862	-0.0792326	-0.0621221	-0.0694811	-0.054248	-0.0510751
0.488	0.000559631	-0.0364452	-0.133687	-0.178357	-0.143598	-0.108513	-0.0813531	-0.0808069	-0.0626365	-0.071793	-0.0536836	-0.0505957
0.489	-1.68e-05	-0.0339707	-0.132706	-0.178936	-0.145022	-0.108894	-0.0816237	-0.0823142	-0.0637453	-0.0740291	-0.0531582	-0.0500845
0.49	-0.000526879	-0.0318497	-0.13196	-0.179421	-0.146691	-0.109092	-0.0819234	-0.0837529	-0.0654074	-0.0760457	-0.0527213	-0.0494904
0.491	-0.000824631	-0.0298406	-0.131565	-0.17981	-0.148527	-0.109165	-0.0821927	-0.0850792	-0.0668823	-0.0776457	-0.052342	-0.0488369
0.492	-0.000769107	-0.0277433	-0.131628	-0.180018	-0.150383	-0.109189	-0.0824754	-0.086251	-0.0672094	-0.0787692	-0.0520381	-0.0481376
0.493	-0.000319467	-0.0255853	-0.132175	-0.180022	-0.15216	-0.1093	-0.0827716	-0.0872465	-0.0661873	-0.079489	-0.0518086	-0.0474073
0.494	0.000375397	-0.0235579	-0.13306	-0.179856	-0.15386	-0.109695	-0.0830394	-0.0880993	-0.0644276	-0.0798813	-0.0515928	-0.046808
0.495	0.0010911	-0.0217478	-0.133986	-0.179513	-0.155522	-0.110543	-0.0832506	-0.0888563	-0.0623996	-0.0800405	-0.0514504	-0.0465438
0.496	0.001711	-0.0200736	-0.134751	-0.178955	-0.157125	-0.111857	-0.0833632	-0.0894676	-0.0600152	-0.0800739	-0.0516057	-0.0466956
0.497	0.00219004	-0.0184829	-0.13539	-0.178185	-0.158579	-0.113439	-0.0833435	-0.0898124	-0.0572425	-0.0800401	-0.0521935	-0.047254
0.498	0.00240506	-0.0170104	-0.136007	-0.17731	-0.159871	-0.115023	-0.0833174	-0.0898766	-0.0545132	-0.0799578	-0.053125	-0.0481684
0.499	0.00230265	-0.0156669	-0.136703	-0.176458	-0.161085	-0.116467	-0.0835527	-0.0898144	-0.0522917	-0.0798863	-0.0542443	-0.0493355
0.5	0.00201773	-0.0144572	-0.137604	-0.175667	-0.16228	-0.117785	-0.0842065	-0.0898263	-0.0506864	-0.0798755	-0.0554026	-0.0506722
0.501	0.00165697	-0.0134676	-0.13875	-0.174915	-0.163484	-0.119043	-0.0852761	-0.0899493	-0.0497459	-0.0799331	-0.0564257	-0.0521176
0.502	0.0012588	-0.0128777	-0.1401	-0.17419	-0.164708	-0.12029	-0.0867016	-0.0900342	-0.049794	-0.0801746	-0.0572191	-0.0535318
0.503	0.000898549	-0.0128831	-0.141691	-0.17349	-0.16597	-0.121528	-0.0883327	-0.0899639	-0.0511564	-0.0807711	-0.0577895	-0.0547973
0.504	0.00058632	-0.0135703	-0.14354	-0.17274	-0.167243	-0.122737	-0.0900023	-0.0896176	-0.0537092	-0.0816561	-0.0581203	-0.0558715
0.505	0.000239633	-0.0149144	-0.145515	-0.171811	-0.168405	-0.123954	-0.0916768	-0.0888248	-0.0569747	-0.0825281	-0.0582015	-0.0566332
0.506	-0.000194863	-0.0168637	-0.147525	-0.170595	-0.169319	-0.125223	-0.0933655	-0.087625	-0.0606304	-0.0831749	-0.0581186	-0.0568982
0.507	-0.000767953	-0.0193635	-0.149583	-0.169019	-0.169951	-0.126495	-0.0949623	-0.0862181	-0.0646073	-0.083536	-0.058037	-0.0566331
0.508	-0.0015153	-0.0222712	-0.151647	-0.16712	-0.170433	-0.127681	-0.0963378	-0.0846562	-0.0687147	-0.0834799	-0.0581242	-0.0560343
0.509	-0.00230061	-0.0253144	-0.153648	-0.164996	-0.170886	-0.12872	-0.0974803	-0.082873	-0.0725465	-0.0827248	-0.0584444	-0.0553205
0.51	-0.00290989	-0.0282338	-0.155576	-0.162658	-0.171177	-0.12956	-0.0984329	-0.0808933	-0.0757756	-0.0810331	-0.0589191	-0.0545627
0.511	-0.0032721	-0.0309029	-0.15736	-0.160147	-0.171081	-0.130166	-0.0992366	-0.0787841	-0.0782714	-0.078514	-0.0594303	-0.0537778
0.512	-0.00341867	-0.0333262	-0.158841	-0.157662	-0.170537	-0.130597	-0.0999444	-0.0765959	-0.0799647	-0.0755468	-0.0599836	-0.0530298
0.513	-0.00335505	-0.0355272	-0.159845	-0.15534	-0.169597	-0.130978	-0.10054	-0.0744906	-0.0808398	-0.0724	-0.0606261	-0.0523985
0.514	-0.00312135	-0.0374383	-0.16022	-0.153074	-0.168357	-0.131358	-0.100847	-0.0726401	-0.0810112	-0.0691767	-0.0612008	-0.0519288
0.515	-0.00291125	-0.038974	-0.159918	-0.150665	-0.166883	-0.131699	-0.100695	-0.0711111	-0.0806754	-0.0659506	-0.0614798	-0.051645
0.516	-0.00293285	-0.0401222	-0.159067	-0.147994	-0.165106	-0.131936	-0.100168	-0.0699905	-0.0799131	-0.0628434	-0.0614748	-0.0516003
0.517	-0.00319134	-0.0409391	-0.157931	-0.145041	-0.16291	-0.132036	-0.0994886	-0.0693579	-0.0786765	-0.0601605	-0.0613525	-0.0518032
0.518	-0.00356659	-0.0415577	-0.156783	-0.141897	-0.1603	-0.132008	-0.0988582	-0.0692159	-0.0769994	-0.058228	-0.0611608	-0.0520723
0.519	-0.00397397	-0.0421685	-0.155759	-0.138739	-0.157397	-0.131771	-0.0984428	-0.0695029	-0.0749243	-0.0570119	-0.0608322	-0.0521483
0.52	-0.00431773	-0.042889	-0.154854	-0.135769	-0.154434	-0.131229	-0.0982486	-0.0700257	-0.0724795	-0.0562411	-0.0603568	-0.0519063
0.521	-0.00445894	-0.0437208	-0.154091	-0.13309	-0.15162	-0.130504	-0.0980358	-0.0704715	-0.0699342	-0.0557992	-0.0597601	-0.0513469
0.522	-0.00437353	-0.0446896	-0.153572	-0.130626	-0.148954	-0.129749	-0.0975515	-0.0705261	-0.0676225	-0.0557085	-0.0590785	-0.0504856
0.523	-0.004144	-0.0458382	-0.153316	-0.128275	-0.146397	-0.128906	-0.0968453	-0.0699298	-0.0655744	-0.0558875	-0.0583881	-0.0493283
0.524	-0.00379838	-0.04705	-0.153166	-0.126054	-0.143975	-0.127873	-0.0961156	-0.0685169	-0.063766	-0.0561195	-0.0576322	-0.0479489
0.525	-0.00334939	-0.0480859	-0.152879	-0.124035	-0.141603	-0.12662	-0.0953218	-0.0663234	-0.0624122	-0.0561622	-0.0566408	-0.0465001
0.526	-0.00283185	-0.0488037	-0.152291	-0.122246	-0.139164	-0.125127	-0.0943366	-0.0636097	-0.0616527	-0.0558078	-0.0554114	-0.0451098
0.527	-0.00223382	-0.0491872	-0.151338	-0.120661	-0.13663	-0.123372	-0.0931702	-0.0607284	-0.0612779	-0.0549854	-0.0541288	-0.0438336
0.528	-0.00150722	-0.0492639	-0.14995	-0.119137	-0.13394	-0.121379	-0.0917947	-0.0580009	-0.0608747	-0.0537984	-0.0528987	-0.0426967
0.529	-0.000631095	-0.049114	-0.14803	-0.117469	-0.131028	-0.119279	-0.0901003	-0.0556223	-0.0601329	-0.0523748	-0.0516216	-0.0417055
0.53	0.000376309	-0.0487881	-0.145573	-0.115534	-0.127984	-0.117229	-0.0880369	-0.0536196	-0.0590207	-0.0507591	-0.0502213	-0.0408739
0.531	0.00147161	-0.0482449	-0.1427	-0.113305	-0.124982	-0.115196	-0.0856756	-0.05194	-0.057556	-0.0489532	-0.0488283	-0.040329
0.532	0.0025465	-0.0475117	-0.139504	-0.110787	-0.122146	-0.113087	-0.0831489	-0.0505067	-0.055638	-0.0470333	-0.0476246	-0.0402233
0.533	0.00342147	-0.0467119	-0.136021	-0.107942	-0.119522	-0.110918	-0.080564	-0.049168	-0.0534294	-0.0451144	-0.0465911	-0.0404887
0.534	0.00400399	-0.0458984	-0.132281	-0.104757	-0.117029	-0.108613	-0.0780532	-0.0478098	-0.0514246	-0.0432245	-0.0454013	-0.040948
0.535	0.00437782	-0.0450791	-0.128368	-0.10137	-0.114514	-0.106002	-0.0758419	-0.04652	-0.0498097	-0.0414111	-0.0436052	-0.0416067
0.536	0.00465497	-0.0442708	-0.124424	-0.0980311	-0.111965	-0.103103	-0.0741425	-0.0454693	-0.0482994	-0.0398346	-0.0408984	-0.0424662
0.537	0.00490166	-0.0434073	-0.120609	-0.0949368	-0.109559	-0.100058	-0.073005	-0.0447003	-0.0466927	-0.0385922	-0.0371899	-0.0432217
0.538	0.00516996	-0.0423776	-0.117085	-0.0921562	-0.107406	-0.0969206	-0.0723032	-0.0440823	-0.0450989	-0.037642	-0.0326968	-0.043416
0.539	0.00548583	-0.0411428	-0.113957	-0.0896525	-0.105381	-0.0937519	-0.071839	-0.043444	-0.0437075	-0.0369739	-0.0280508	-0.0426185
0.54	0.00586044	-0.0397646	-0.11131	-0.0872976	-0.103317	-0.0907545	-0.0714414	-0.0426931	-0.0425764	-0.0366153	-0.0240378	-0.040538
0.541	0.00628679	-0.0383529	-0.109288	-0.0849765	-0.101182	-0.0881493	-0.0709606	-0.0417542	-0.0414282	-0.036444	-0.02122	-0.0372482
0.542	0.00672955	-0.03697	-0.107922	-0.0826776	-0.09902	-0.0860463	-0.0702394	-0.040553	-0.0397974	-0.036226	-0.0198526	-0.0331605
0.543	0.00712052	-0.0356442	-0.107008	-0.0804188	-0.0968726	-0.0844484	-0.069166	-0.0392091	-0.037672	-0.0358371	-0.0199408	-0.0287626
0.544	0.00741393	-0.0344246	-0.106284	-0.0782052	-0.0947148	-0.083289	-0.067779	-0.0380877	-0.0355936	-0.0353356	-0.0213372	-0.0244689
0.545	0.00766933	-0.0333071	-0.105595	-0.076044	-0.092459	-0.0823824	-0.0662509	-0.0374676	-0.0339881	-0.0349085	-0.0237951	-0.0206555
0.546	0.00800252	-0.0321574	-0.104825	-0.0739119	-0.0900763	-0.0814543	-0.0647279	-0.0373481	-0.0328084	-0.0347586	-0.0268393	-0.0176975
0.547	0.00848274	-0.0307876	-0.103804	-0.0716981	-0.0875681	-0.080361	-0.0632301	-0.0376752	-0.0317999	-0.0349267	-0.0298457	-0.0158734
0.548	0.00902728	-0.0291074	-0.102342	-0.0692361	-0.0849364	-0.0791659	-0.0616927	-0.0384223	-0.030953	-0.0352916	-0.032344	-0.0152318
0.549	0.00943052	-0.0271348	-0.10031	-0.0664319	-0.0822784	-0.0779257	-0.0600775	-0.0394536	-0.0305743	-0.0357762	-0.0340683	-0.0156284
0.55	0.00959645	-0.0249385	-0.0977152	-0.0632727	-0.0797295	-0.0765099	-0.0583201	-0.0405607	-0.0307836	-0.0364337	-0.0348939	-0.0169182
0.551	0.00960551	-0.0226216	-0.0946579	-0.0598396	-0.077336	-0.0747354	-0.0562725	-0.0415819	-0.0312541	-0.0373981	-0.034775	-0.0188851
0.552	0.00951036	-0.0202756	-0.0913184	-0.0563883	-0.0750979	-0.0725503	-0.0539315	-0.042375	-0.0315038	-0.0387433	-0.0337286	-0.0210815
0.553	0.00928511	-0.0179891	-0.0879227	-0.0532333	-0.0730351	-0.0699884	-0.0514926	-0.0428026	-0.0311782	-0.0402747	-0.0319465	-0.0230617
0.554	0.00899783	-0.0158947	-0.0846477	-0.0505899	-0.071116	-0.0671449	-0.0491111	-0.0428423	-0.0303179	-0.0416104	-0.029767	-0.0245793
0.555	0.00885114	-0.0140821	-0.0816216	-0.0485724	-0.0692897	-0.0641889	-0.0468321	-0.0425592	-0.0294536	-0.0424798	-0.0275409	-0.0254639
0.556	0.00903698	-0.0125032	-0.0789195	-0.047215	-0.067633	-0.0612463	-0.0447078	-0.0419642	-0.0290361	-0.0427889	-0.0255088	-0.0255936
0.557	0.00964527	-0.011086	-0.0765043	-0.0464675	-0.0663018	-0.0584243	-0.0429122	-0.040975	-0.0288373	-0.0424566	-0.0237018	-0.0250208
0.558	0.0106897	-0.00983273	-0.0742629	-0.0462345	-0.0653847	-0.0559588	-0.0416536	-0.0395241	-0.0283124	-0.0413749	-0.0220924	-0.02397
0.559	0.0120836	-0.00878102	-0.0721379	-0.0464123	-0.0648608	-0.0540763	-0.0409072	-0.0377048	-0.0274232	-0.0395793	-0.0207431	-0.0227194
0.56	0.01362	-0.00793339	-0.0701469	-0.0468716	-0.0646156	-0.0528442	-0.0404716	-0.0356733	-0.0266032	-0.0372857	-0.0196726	-0.0214326
0.561	0.0150713	-0.0071467	-0.0682795	-0.0474654	-0.0644343	-0.0522355	-0.040226	-0.0334887	-0.0259154	-0.0347771	-0.0188112	-0.020043
0.562	0.0162979	-0.00619605	-0.0665236	-0.0480393	-0.0640912	-0.0521253	-0.0400718	-0.0312316	-0.0249189	-0.0323653	-0.0180955	-0.0184761
0.563	0.017209	-0.00503916	-0.0648836	-0.0483639	-0.0634701	-0.0522901	-0.0398774	-0.0290882	-0.023503	-0.030329	-0.0175291	-0.0169005
0.564	0.0176777	-0.0037746	-0.0633105	-0.0481586	-0.0625427	-0.0524779	-0.0396419	-0.0271736	-0.0221336	-0.0287837	-0.0171662	-0.0155947
0.565	0.0176377	-0.00234727	-0.0618276	-0.0473171	-0.0613417	-0.0524843	-0.039446	-0.0254701	-0.021136	-0.0276385	-0.016961	-0.0147859
0.566	0.0172114	-0.000598298	-0.0605068	-0.0459877	-0.0599938	-0.0522804	-0.0392947	-0.0239831	-0.0203682	-0.0267071	-0.0168138	-0.0145763
0.567	0.0166739	0.00144712	-0.0592397	-0.0443387	-0.0587059	-0.0520093	-0.0391921	-0.0227578	-0.0197193	-0.0258387	-0.0167223	-0.0148334
0.568	0.0162763	0.00352572	-0.0578544	-0.0423783	-0.05761	-0.0517513	-0.0391693	-0.0217816	-0.0193656	-0.0249758	-0.0166653	-0.0152814
0.569	0.0160984	0.00532662	-0.0562668	-0.0400581	-0.0566428	-0.0513838	-0.0391994	-0.0209337	-0.0193289	-0.0241367	-0.016558	-0.0157448
0.57	0.0160612	0.00664686	-0.0544334	-0.0374657	-0.0557131	-0.0507169	-0.0392567	-0.0200229	-0.0192758	-0.0233361	-0.0163719	-0.0161764
0.571	0.0160565	0.00746061	-0.0523588	-0.0347925	-0.0548847	-0.0496575	-0.0394035	-0.0189253	-0.0189663	-0.0226102	-0.0160809	-0.0164901
0.572	0.0160705	0.00798447	-0.0500891	-0.0321947	-0.0542157	-0.0482298	-0.0397426	-0.017585	-0.0184802	-0.022055	-0.0155887	-0.0165525
0.573	0.0161335	0.00854151	-0.0477092	-0.0297945	-0.0535647	-0.0465368	-0.040306	-0.0159328	-0.0178953	-0.0216858	-0.0148234	-0.0162515
0.574	0.0162685	0.00931211	-0.0453529	-0.0276342	-0.0527439	-0.0447269	-0.0409934	-0.013953	-0.0170582	-0.0213979	-0.0138273	-0.0155462
0.575	0.0166003	0.0102939	-0.0431318	-0.0256544	-0.0516802	-0.0429255	-0.041623	-0.0117569	-0.0157784	-0.0210615	-0.0127803	-0.0145561
0.576	0.017224	0.0113531	-0.0411272	-0.0238708	-0.0504219	-0.0412105	-0.0419914	-0.00950233	-0.0141766	-0.0205146	-0.0119166	-0.0134207
0.577	0.0179996	0.0122692	-0.0394074	-0.0224212	-0.049109	-0.03967	-0.0418363	-0.00727051	-0.0127262	-0.0196235	-0.0113706	-0.0121827
0.578	0.0187294	0.0128305	-0.0379398	-0.0214007	-0.0477838	-0.0383852	-0.0409666	-0.00510545	-0.0118033	-0.0184211	-0.0111211	-0.0109664
0.579	0.0193195	0.0129334	-0.0365854	-0.0208333	-0.0463496	-0.0373575	-0.0395227	-0.00310864	-0.0113697	-0.0171054	-0.0110413	-0.0100182
0.58	0.0197251	0.0126338	-0.035194	-0.0206946	-0.0447884	-0.0364886	-0.0378564	-0.00140202	-0.0112127	-0.0158682	-0.0110317	-0.00948483
0.581	0.0199342	0.0120818	-0.0336528	-0.0208471	-0.0431585	-0.0356285	-0.036168	-6.57e-05	-0.0112779	-0.0147484	-0.0110558	-0.00935256
0.582	0.0200137	0.0113967	-0.0319245	-0.0211194	-0.0415232	-0.0346759	-0.034418	0.0008656	-0.0116634	-0.0137474	-0.0111078	-0.00957428
0.583	0.0200886	0.0106904	-0.0300619	-0.0214016	-0.0399586	-0.0335964	-0.0325197	0.00133249	-0.0123695	-0.0129838	-0.0111868	-0.0100425
0.584	0.0202208	0.0101453	-0.0281618	-0.0215572	-0.0384471	-0.0323845	-0.030539	0.00124444	-0.0132185	-0.0126024	-0.0111357	-0.0106006
0.585	0.0203546	0.00990465	-0.0263802	-0.0214124	-0.0368741	-0.0311016	-0.0287011	0.000630089	-0.0139219	-0.0126154	-0.0107343	-0.0111992
0.586	0.0203873	0.00994267	-0.024962	-0.020893	-0.0351976	-0.0298787	-0.0272264	-0.00032889	-0.0141855	-0.0128911	-0.0100218	-0.0118112
0.587	0.0202324	0.0101334	-0.0240878	-0.0200218	-0.0335405	-0.0287912	-0.0262102	-0.00145608	-0.0139614	-0.0132952	-0.0092252	-0.0123249
0.588	0.0198952	0.0104108	-0.0237049	-0.0188602	-0.0320372	-0.0277862	-0.0256023	-0.00263094	-0.0134683	-0.0137814	-0.0085209	-0.0126343
0.589	0.0195437	0.0108395	-0.0236537	-0.0175846	-0.0306587	-0.0267593	-0.0252388	-0.00364862	-0.0129592	-0.0143101	-0.00795866	-0.012611
0.59	0.0193587	0.0115087	-0.023832	-0.0164148	-0.0293494	-0.0256412	-0.0249269	-0.00423894	-0.0125641	-0.0147832	-0.00741115	-0.0121841
0.591	0.0193442	0.0123698	-0.0240872	-0.0154106	-0.0281748	-0.0243887	-0.0245495	-0.00433159	-0.0121945	-0.0151043	-0.00671426	-0.0115278
0.592	0.0194984	0.0132736	-0.0241966	-0.014531	-0.0272672	-0.0229485	-0.0240546	-0.00414241	-0.0116904	-0.0152575	-0.00597204	-0.010877
0.593	0.0199193	0.0140994	-0.0239884	-0.0138277	-0.0267227	-0.0213511	-0.0233087	-0.00394677	-0.0110813	-0.0152827	-0.00543669	-0.0103082
0.594	0.0205397	0.0147814	-0.0233526	-0.0134059	-0.0264824	-0.0197742	-0.0221739	-0.00390027	-0.0105036	-0.0152475	-0.00518633	-0.0098089
0.595	0.0211422	0.0152552	-0.0222919	-0.0132379	-0.0264203	-0.0183571	-0.0207515	-0.00403716	-0.00996884	-0.015267	-0.00517452	-0.00930082
0.596	0.0216291	0.0153595	-0.0209413	-0.0131827	-0.0264727	-0.017108	-0.0192706	-0.00432191	-0.00934571	-0.0153835	-0.0052856	-0.00870724
0.597	0.0219822	0.0149452	-0.0194466	-0.0131662	-0.0264782	-0.01603	-0.0178509	-0.00469801	-0.00849848	-0.0154042	-0.00535397	-0.00810865
0.598	0.02215	0.0141157	-0.01791	-0.0131993	-0.0261985	-0.0151673	-0.0165365	-0.0050479	-0.00738629	-0.0150694	-0.00529568	-0.00764364
0.599	0.0220561	0.0131454	-0.0164051	-0.0132879	-0.0255738	-0.0145971	-0.0153303	-0.00520106	-0.00605628	-0.014422	-0.00512512	-0.00735289
0.6	0.0216345	0.0121884	-0.0149831	-0.0133739	-0.0246887	-0.0143936	-0.0141733	-0.0050196	-0.00458266	-0.0137523	-0.00492809	-0.00727452
0.601	0.0209262	0.0112511	-0.0136783	-0.013325	-0.0236253	-0.0144996	-0.0130284	-0.00445728	-0.0030363	-0.0132409	-0.00476947	-0.0075534
0.602	0.0201002	0.010393	-0.0125086	-0.0130607	-0.0224502	-0.0147041	-0.0119674	-0.00363882	-0.00155962	-0.0129705	-0.00462319	-0.00830058
0.603	0.0193408	0.0097657	-0.0114777	-0.0126211	-0.0212411	-0.0148397	-0.0111635	-0.00277268	-0.000375091	-0.0130256	-0.00446236	-0.00938394
0.604	0.018773	0.00946279	-0.0105781	-0.012058	-0.0201938	-0.0148937	-0.0107999	-0.00195567	0.000388668	-0.0133762	-0.00424881	-0.0104375
0.605	0.0184765	0.00944572	-0.00979761	-0.0114135	-0.0195885	-0.0148617	-0.010975	-0.00119994	0.00069855	-0.0139438	-0.00389306	-0.0111355
0.606	0.0185121	0.00967798	-0.00910253	-0.0107548	-0.0195177	-0.0147391	-0.0116273	-0.000539675	0.000446936	-0.0146848	-0.00340077	-0.0114358
0.607	0.0189365	0.0101972	-0.00843879	-0.0101566	-0.0198309	-0.0146194	-0.0125416	-1.03e-05	-0.000430524	-0.0155058	-0.00293029	-0.0114994
0.608	0.0197437	0.0109799	-0.00778879	-0.00970155	-0.0203706	-0.0145402	-0.013469	0.000348965	-0.00168245	-0.0163238	-0.00264771	-0.0115347
0.609	0.0207751	0.0119454	-0.00710472	-0.00946538	-0.0211059	-0.0143849	-0.0142245	0.000454178	-0.00278175	-0.0170758	-0.00260414	-0.0117588
0.61	0.0218259	0.0130478	-0.00625235	-0.00952717	-0.0220435	-0.0141016	-0.0147115	0.000222411	-0.00330275	-0.0176056	-0.00274389	-0.0123122
0.611	0.0228486	0.0141931	-0.00517686	-0.00990952	-0.0230825	-0.0138269	-0.0148925	-0.000424602	-0.00321776	-0.0178105	-0.00304999	-0.0132271
0.612	0.0238386	0.0151768	-0.00391888	-0.0104801	-0.0240022	-0.0137161	-0.0147698	-0.00159045	-0.0027803	-0.017749	-0.00359835	-0.0145503
0.613	0.0246053	0.0158044	-0.00249471	-0.0110376	-0.024632	-0.0138841	-0.0144474	-0.00325543	-0.00213861	-0.0174711	-0.0043766	-0.0163392
0.614	0.0249338	0.0160279	-0.000983205	-0.011471	-0.0249315	-0.0144355	-0.0140928	-0.00516657	-0.00121461	-0.0169502	-0.00519253	-0.0184573
0.615	0.0248204	0.015967	0.000405008	-0.0118242	-0.0248464	-0.0153281	-0.0138406	-0.00701948	-9.64e-05	-0.0162134	-0.00580908	-0.0205613
0.616	0.0244324	0.0158101	0.00145368	-0.0122041	-0.0243354	-0.016388	-0.0137879	-0.00867983	0.000788552	-0.0154691	-0.00612011	-0.0224069
0.617	0.0239418	0.0156704	0.00209506	-0.0126368	-0.0235712	-0.0174571	-0.0139127	-0.0101633	0.00114233	-0.0149865	-0.00618802	-0.0240001
0.618	0.0233988	0.0155315	0.00241435	-0.0130971	-0.0228675	-0.0183401	-0.0141321	-0.0114456	0.00115052	-0.0148408	-0.00603659	-0.0253855
0.619	0.0227906	0.0153027	0.00251505	-0.0135568	-0.0224361	-0.0188198	-0.0144985	-0.0124151	0.0011687	-0.014893	-0.00553804	-0.02652
0.62	0.0221446	0.0149017	0.00243136	-0.0139279	-0.0223115	-0.0188275	-0.015093	-0.013058	0.00111107	-0.0150193	-0.00462364	-0.0273474
0.621	0.0215395	0.0142764	0.00213444	-0.0141077	-0.0223811	-0.018379	-0.0158586	-0.0135215	0.000452474	-0.0152554	-0.00347806	-0.0278197
0.622	0.0211182	0.0134404	0.00158178	-0.0141038	-0.0224909	-0.0174843	-0.0167094	-0.0139492	-0.00101977	-0.0157291	-0.00243453	-0.0279331
0.623	0.0210117	0.0125333	0.00078331	-0.0140263	-0.022621	-0.0162484	-0.0176609	-0.0144234	-0.00283196	-0.0165431	-0.00167709	-0.0277281
0.624	0.0212499	0.0117156	-0.000178216	-0.013964	-0.0227922	-0.0148532	-0.0187004	-0.0150223	-0.00431929	-0.0176206	-0.00113496	-0.0271997
0.625	0.0218261	0.01105	-0.00115541	-0.0139819	-0.0228876	-0.0134679	-0.0196301	-0.0157496	-0.00520379	-0.0186685	-0.000706055	-0.0264012
0.626	0.0227222	0.0105648	-0.00201186	-0.0141664	-0.0228163	-0.0122096	-0.0202346	-0.0164251	-0.00549433	-0.0193849	-0.000463638	-0.02556
0.627	0.0238426	0.0103653	-0.00274523	-0.0145068	-0.0226353	-0.0111675	-0.0204589	-0.0168153	-0.00505848	-0.0196483	-0.000501024	-0.0249034
0.628	0.0249878	0.0105846	-0.00344619	-0.0148913	-0.0224455	-0.0104393	-0.0203083	-0.0168991	-0.00378613	-0.0195192	-0.00070744	-0.0244726
0.629	0.0259148	0.0111727	-0.00412525	-0.015227	-0.0222878	-0.0100553	-0.0197882	-0.0168523	-0.00201568	-0.0191594	-0.00092253	-0.024055
0.63	0.026454	0.0119327	-0.00468288	-0.0154299	-0.022113	-0.0100202	-0.0189116	-0.0168241	-0.000386163	-0.0187611	-0.00121358	-0.0231576
0.631	0.0265515	0.0127264	-0.00507698	-0.015417	-0.0218977	-0.0104081	-0.0177354	-0.016855	0.000706721	-0.0184593	-0.00181355	-0.0212049
0.632	0.0262357	0.0134462	-0.00536819	-0.015155	-0.0217728	-0.0112037	-0.0164867	-0.0169396	0.00135418	-0.0183458	-0.00277239	-0.0178824
0.633	0.0255739	0.0139543	-0.00558851	-0.0146842	-0.021987	-0.0121998	-0.0154395	-0.0171395	0.00170885	-0.0185314	-0.00380607	-0.0133732
0.634	0.0246636	0.014172	-0.00577788	-0.0140394	-0.022729	-0.013155	-0.014696	-0.017604	0.0015878	-0.0190307	-0.00457433	-0.00834188
0.635	0.0236336	0.0141322	-0.00606808	-0.0131888	-0.0239591	-0.013935	-0.0142724	-0.0183882	0.000665282	-0.0197198	-0.00498795	-0.00356546
0.636	0.0226073	0.0138805	-0.00654954	-0.0121704	-0.0254142	-0.0144631	-0.0142249	-0.0193347	-0.00117278	-0.0204656	-0.00510044	0.000455225
0.637	0.0217067	0.0134276	-0.00713744	-0.0111761	-0.0267648	-0.0145871	-0.0146412	-0.0202382	-0.00368074	-0.021198	-0.00493763	0.00350661
0.638	0.0210266	0.0127948	-0.00766634	-0.0104461	-0.0277739	-0.0142001	-0.0156063	-0.020982	-0.00649454	-0.0219792	-0.00467599	0.00550177
0.639	0.0205887	0.0119954	-0.00809561	-0.0100635	-0.0283825	-0.0134745	-0.017143	-0.0214969	-0.0094026	-0.0229171	-0.00458757	0.00650531
0.64	0.0204041	0.0110809	-0.00845512	-0.00987592	-0.0287134	-0.0127491	-0.019114	-0.0217393	-0.0120904	-0.0238786	-0.00470722	0.00677279
0.641	0.0204602	0.0101342	-0.00862519	-0.00969534	-0.0289578	-0.0122689	-0.0212051	-0.0216654	-0.0140072	-0.0245127	-0.00495987	0.00661442
0.642	0.0206645	0.00913703	-0.00845669	-0.00942501	-0.0292196	-0.0120907	-0.0230739	-0.0212927	-0.0149489	-0.0246325	-0.00536674	0.00628217
0.643	0.0208843	0.00808358	-0.00803056	-0.00907978	-0.0294831	-0.0121122	-0.0244952	-0.0207899	-0.0153265	-0.024327	-0.00582765	0.00588588
0.644	0.0209309	0.00712845	-0.00759325	-0.00881492	-0.029667	-0.0122625	-0.0253324	-0.0203241	-0.0155219	-0.0237041	-0.00607934	0.00532827
0.645	0.0207113	0.00641812	-0.00736876	-0.00874893	-0.0296976	-0.0126345	-0.0254538	-0.0199385	-0.015389	-0.0227716	-0.00602257	0.00439289
0.646	0.0203945	0.0059771	-0.00746756	-0.00880145	-0.0295372	-0.0132797	-0.0248277	-0.0196872	-0.0147203	-0.0214935	-0.00582095	0.0029227
0.647	0.0201533	0.00580711	-0.00784717	-0.00882023	-0.0291731	-0.014063	-0.0236485	-0.019631	-0.0138624	-0.0198825	-0.00568543	0.000918182
0.648	0.0199682	0.00590971	-0.00833129	-0.00880221	-0.0287193	-0.0148387	-0.0221954	-0.0196335	-0.0132812	-0.0181828	-0.00571879	-0.00147237
0.649	0.019796	0.00622075	-0.00872322	-0.00884344	-0.0283809	-0.0155531	-0.0205546	-0.0194589	-0.0129129	-0.0168562	-0.00590419	-0.00394813
0.65	0.0196601	0.0066302	-0.00897707	-0.00895287	-0.0282372	-0.0161913	-0.0186581	-0.0190725	-0.012493	-0.0163098	-0.00621893	-0.00619893
0.651	0.0195345	0.00705303	-0.00915128	-0.00915305	-0.0282152	-0.0167964	-0.0165851	-0.0186151	-0.0120339	-0.0166382	-0.00671115	-0.00810803
0.652	0.0193292	0.00740658	-0.00926886	-0.00947974	-0.0281863	-0.0174223	-0.0145419	-0.0181413	-0.0116729	-0.0175189	-0.00739325	-0.00965201
0.653	0.0190157	0.00755568	-0.00934698	-0.00977963	-0.0280947	-0.017988	-0.0126594	-0.0174901	-0.0113633	-0.0184415	-0.00818614	-0.0107691
0.654	0.0186336	0.00739714	-0.00941674	-0.00984229	-0.0280617	-0.0183494	-0.011022	-0.0164748	-0.0109849	-0.0190413	-0.00894795	-0.0113842
0.655	0.0147887	0.0070135	-0.0095348	-0.00955673	-0.0282849	-0.0184677	-0.00971256	-0.0151386	-0.010558	-0.0191609	-0.00950848	-0.0114516
0.656	-0.00282251	0.00662822	-0.00978854	-0.008851	-0.0288371	-0.0183593	-0.00870243	-0.0135899	-0.0101358	-0.0187418	-0.00977656	-0.0110712
0.657	-0.0427165	0.00637674	-0.0102446	-0.00778198	-0.0295708	-0.018081	-0.00788549	-0.0117626	-0.00981108	-0.0177945	-0.00978118	-0.0104831
0.658	-0.100907	0.00623399	-0.0109079	-0.00661243	-0.030281	-0.0177293	-0.00728683	-0.00960918	-0.00964245	-0.016451	-0.0095621	-0.0098423
0.659	-0.164759	0.00613468	-0.0117082	-0.00566316	-0.0309709	-0.0173476	-0.00700393	-0.00729792	-0.0093079	-0.0148772	-0.00916831	-0.00912742
0.66	-0.221848	0.00606266	-0.0125898	-0.0051193	-0.031773	-0.0170458	-0.00702312	-0.00508549	-0.0084521	-0.0131882	-0.00880257	-0.00819871
0.661	-0.263618	0.00605534	-0.0135283	-0.00495242	-0.0326463	-0.0170005	-0.0072295	-0.00314279	-0.00734531	-0.0115037	-0.0086956	-0.00688443
0.662	-0.285971	0.0061499	-0.0144149	-0.0050303	-0.0332884	-0.0172205	-0.00749501	-0.00156941	-0.00644188	-0.00991478	-0.00879377	-0.00519043
0.663	-0.288581	0.00635391	-0.0151044	-0.00524776	-0.0333515	-0.017566	-0.0077669	-0.000456723	-0.00560419	-0.0083904	-0.00881709	-0.00339121
0.664	-0.273559	0.00666667	-0.0154673	-0.00555086	-0.0327232	-0.0178973	-0.0080358	0.000160788	-0.00448529	-0.00687427	-0.00866304	-0.00184377
0.665	-0.24442	0.00708806	-0.0154297	-0.00588123	-0.0315109	-0.0181194	-0.00826504	0.000295058	-0.0032487	-0.00548495	-0.00851871	-0.000828647
0.666	-0.205547	0.00756405	-0.0151252	-0.00614849	-0.0298894	-0.0181841	-0.00845361	-3.72e-05	-0.00232873	-0.00440768	-0.00851892	-0.000454243
0.667	-0.161504	0.00793675	-0.0147456	-0.00627362	-0.0281073	-0.0181074	-0.00864638	-0.000771367	-0.00174682	-0.00366859	-0.0086199	-0.000563957
0.668	-0.116333	0.00805726	-0.0143122	-0.00619023	-0.026323	-0.0179595	-0.00890281	-0.00178697	-0.00112415	-0.00324204	-0.00878244	-0.000873742
0.669	-0.0732633	0.00794773	-0.0137943	-0.00587826	-0.0244296	-0.0178053	-0.00932861	-0.00295851	-0.000286485	-0.00321136	-0.0089884	-0.00121678
0.67	-0.0345911	0.00781962	-0.013203	-0.0054094	-0.0223627	-0.0176581	-0.00997319	-0.00423376	0.000625879	-0.00367535	-0.0091104	-0.00159524
0.671	-0.00177236	0.00786846	-0.0125787	-0.0048981	-0.0202809	-0.0174093	-0.0106965	-0.00564847	0.00166583	-0.00460171	-0.00890456	-0.00210751
0.672	0.0243505	0.008129	-0.0119987	-0.00441546	-0.0183043	-0.0168986	-0.0113082	-0.00724022	0.00314511	-0.00591903	-0.00826424	-0.00286462
0.673	0.0436152	0.00866269	-0.0114748	-0.00395864	-0.0164581	-0.0160769	-0.0116965	-0.00906421	0.00497732	-0.00764635	-0.00731685	-0.00387142
0.674	0.0565089	0.00956748	-0.0109476	-0.00353324	-0.0148328	-0.0150048	-0.0117569	-0.0112239	0.00652059	-0.00975758	-0.00619358	-0.00500702
0.675	0.0637401	0.0107137	-0.0104131	-0.00319585	-0.0135214	-0.0137806	-0.0114395	-0.0136348	0.00739226	-0.0120421	-0.00498441	-0.00610801
0.676	0.0660708	0.0117961	-0.00993772	-0.00295041	-0.0125206	-0.0125092	-0.0107796	-0.0159294	0.00794272	-0.0142082	-0.003751	-0.00699645
0.677	0.0645389	0.0126394	-0.00959324	-0.00273322	-0.0118029	-0.0113043	-0.00975074	-0.0178084	0.00864003	-0.0160848	-0.00248788	-0.00751924
0.678	0.060419	0.0132294	-0.00938229	-0.00256332	-0.0113209	-0.0102529	-0.00828286	-0.0191913	0.00928001	-0.0176245	-0.0012771	-0.00756565
0.679	0.0548852	0.0134979	-0.00923409	-0.00248162	-0.011003	-0.00936423	-0.00644313	-0.0199815	0.00921897	-0.0187452	-0.000268274	-0.00707341
0.68	0.0488222	0.0133571	-0.00905057	-0.00237067	-0.0107853	-0.00856812	-0.00448557	-0.0200083	0.00833215	-0.0193193	0.000484987	-0.00610081
0.681	0.0428349	0.0128851	-0.00870736	-0.00206005	-0.0105514	-0.00773718	-0.00272476	-0.0192166	0.00715025	-0.0192839	0.000915758	-0.00483263
0.682	0.0373555	0.0122677	-0.00808651	-0.00146733	-0.0102212	-0.00678328	-0.00139039	-0.0177059	0.00596007	-0.018707	0.000914839	-0.00352134
0.683	0.0327352	0.0116562	-0.00715864	-0.000578289	-0.0098946	-0.00573885	-0.000541189	-0.0156204	0.00443708	-0.0177628	0.000548796	-0.00242241
0.684	0.0291706	0.0111111	-0.00598579	0.000568867	-0.0096982	-0.00464647	-7.04e-05	-0.0131996	0.00240756	-0.0166449	4e-05	-0.00173879
0.685	0.0266773	0.0106389	-0.00467593	0.00188503	-0.00963473	-0.00350891	0.000148388	-0.0107239	0.00030423	-0.0154762	-0.000465955	-0.0016343
0.686	0.0252581	0.0103143	-0.00337229	0.00325103	-0.00969659	-0.00239703	0.000200292	-0.00829656	-0.00141041	-0.0142563	-0.000972469	-0.00215003
0.687	0.0248949	0.0102605	-0.00214723	0.00452815	-0.0099943	-0.00136345	0.000155561	-0.00594478	-0.00263953	-0.0129574	-0.00153235	-0.00304612
0.688	0.0253592	0.0104675	-0.000949978	0.0055511	-0.0106994	-0.000390527	-6.73e-05	-0.00380117	-0.00327626	-0.0116977	-0.00212397	-0.00399737
0.689	0.0262965	0.0108011	0.000215067	0.00618711	-0.0118428	0.000472458	-0.000718696	-0.00202442	-0.00299651	-0.0106306	-0.00266245	-0.00490464
0.69	0.0274621	0.0111616	0.00121583	0.00646939	-0.013256	0.00112024	-0.00193663	-0.000675915	-0.00170619	-0.00970723	-0.0030973	-0.0057739
0.691	0.0286939	0.0114469	0.00194775	0.00657491	-0.0147503	0.00143696	-0.00368617	0.000304583	8.36e-05	-0.00874115	-0.00349047	-0.00653056
0.692	0.0297869	0.0115178	0.00241138	0.00664136	-0.0162206	0.00135764	-0.00590669	0.00105354	0.00165602	-0.00761702	-0.00401171	-0.00713624
0.693	0.0305774	0.011342	0.00261766	0.00677525	-0.0175911	0.000910318	-0.00840663	0.00163895	0.00272966	-0.00640575	-0.00472571	-0.00766174
0.694	0.031082	0.0110396	0.00258017	0.00710231	-0.0187183	7.76e-05	-0.0108482	0.00190979	0.00340755	-0.00532891	-0.00546186	-0.00811014
0.695	0.0314361	0.0107943	0.00239524	0.00760411	-0.0193145	-0.00115613	-0.0128957	0.00164827	0.00372675	-0.00458507	-0.00608722	-0.008328
0.696	0.0316979	0.0107537	0.00220474	0.00815443	-0.0191553	-0.0026241	-0.014236	0.000897574	0.00361502	-0.00421533	-0.00671976	-0.0082117
0.697	0.0317791	0.0109476	0.00211519	0.00877758	-0.0183597	-0.00410927	-0.0147705	-4.4e-05	0.00333827	-0.00413693	-0.00745831	-0.00780185
0.698	0.0315226	0.0113222	0.00217541	0.00962099	-0.0171764	-0.00555169	-0.0147015	-0.00102918	0.00362049	-0.00427577	-0.00811729	-0.0071765
0.699	0.0308073	0.0118236	0.00240825	0.0107102	-0.0156847	-0.00693979	-0.0141828	-0.00222052	0.0048093	-0.00460053	-0.00840141	-0.00643921
0.7	0.029677	0.0123794	0.00281567	0.0118932	-0.0139178	-0.00815761	-0.0132249	-0.00368965	0.00631223	-0.00501028	-0.00821594	-0.00571786
0.701	0.0283735	0.0129051	0.00341005	0.0129865	-0.0120232	-0.00910497	-0.0119369	-0.00519642	0.0075264	-0.00532696	-0.00765932	-0.00512461
0.702	0.0271532	0.0133512	0.00426974	0.0138606	-0.0102034	-0.00976149	-0.010503	-0.00636998	0.00868823	-0.00540566	-0.00682101	-0.0047784
0.703	0.0261065	0.0136513	0.0053992	0.0144116	-0.00855748	-0.0100369	-0.00905914	-0.00687934	0.0100181	-0.00517368	-0.00577649	-0.00479477
0.704	0.0253047	0.0137457	0.00662749	0.0145928	-0.00707544	-0.00979906	-0.0077053	-0.00658179	0.0108303	-0.00466914	-0.00460684	-0.00518595
0.705	0.0248969	0.0137022	0.00778864	0.0144657	-0.00578634	-0.00910758	-0.00647691	-0.00553555	0.0103604	-0.00402352	-0.00331058	-0.00584715
0.706	0.0248522	0.0136723	0.00880598	0.0141813	-0.0047834	-0.00824129	-0.0054044	-0.00391151	0.00882857	-0.003326	-0.00190083	-0.00668567
0.707	0.0249216	0.0137651	0.00957915	0.0139105	-0.00417842	-0.00743279	-0.00463706	-0.00198631	0.00693295	-0.00260658	-0.000532216	-0.00766421
0.708	0.0248709	0.0140494	0.0100033	0.0136971	-0.0040208	-0.00663587	-0.00429005	-3.67e-05	0.00489805	-0.00189347	0.00062032	-0.00869923
0.709	0.0245632	0.014596	0.0100708	0.0134433	-0.00418789	-0.00562504	-0.0042394	0.00185612	0.00275419	-0.00118045	0.00144396	-0.0096962
0.71	0.0239378	0.0154499	0.00990188	0.0130901	-0.00449662	-0.00428828	-0.00425856	0.00374183	0.00094745	-0.000473337	0.00191867	-0.0105979
0.711	0.0229572	0.0165663	0.0097216	0.012694	-0.00488981	-0.00269997	-0.00422451	0.00557463	5.13e-05	0.000135331	0.00212521	-0.0112809
0.712	0.0216386	0.0178159	0.00975153	0.0123223	-0.0053239	-0.00104798	-0.00413882	0.00720984	0.000209779	0.000529013	0.00200869	-0.0116711
0.713	0.020156	0.0190977	0.0101137	0.0120087	-0.00562353	0.000424849	-0.00402975	0.00847429	0.00107685	0.000757856	0.00139414	-0.0118922
0.714	0.0187692	0.0204052	0.0108348	0.0118481	-0.00552936	0.00157563	-0.00386262	0.00920052	0.00218291	0.0010833	0.000373236	-0.0120575
0.715	0.0176838	0.0217861	0.0118784	0.0119848	-0.00484789	0.00245213	-0.00360853	0.00924434	0.00328668	0.00163125	-0.000753263	-0.0121348
0.716	0.0169787	0.0232347	0.0131835	0.0125079	-0.00369297	0.00315919	-0.00329188	0.00846865	0.00431943	0.00216019	-0.00181821	-0.0121392
0.717	0.0166095	0.0246318	0.0146669	0.0133968	-0.00241515	0.00367041	-0.00293403	0.00692155	0.00515269	0.00228452	-0.00268306	-0.0122103
0.718	0.0165491	0.0258143	0.0162333	0.0145188	-0.00125454	0.0039383	-0.00253804	0.00492357	0.00561121	0.0018138	-0.00311853	-0.0124709
0.719	0.0168571	0.0266603	0.0178101	0.0157129	-0.000265077	0.00411926	-0.00207557	0.00281512	0.00558255	0.000763698	-0.0030246	-0.0129252
0.72	0.0175197	0.0271674	0.0192731	0.0168742	0.000520982	0.00443324	-0.00148844	0.000844783	0.00505476	-0.000839953	-0.00243263	-0.0134574
0.721	0.0183592	0.0274349	0.020445	0.0179615	0.00103658	0.00497208	-0.000739207	-0.000783791	0.00421545	-0.00283098	-0.00137742	-0.0139796
0.722	0.0191824	0.0274788	0.0213065	0.018897	0.00128901	0.0056975	9.38e-05	-0.00194841	0.00341789	-0.00486014	-1.61e-05	-0.0145116
0.723	0.0199472	0.0272371	0.0220278	0.0195347	0.00134501	0.0064586	0.000820046	-0.0026085	0.00290354	-0.00678172	0.00140636	-0.0149987
0.724	0.020721	0.0267763	0.0227571	0.019848	0.00127632	0.00713412	0.00133213	-0.00280259	0.00265645	-0.00869122	0.0027183	-0.0153327
0.725	0.0215204	0.0262791	0.0235849	0.0199406	0.00119491	0.00771823	0.0016563	-0.00256886	0.00258247	-0.0104823	0.00378339	-0.015491
0.726	0.0223065	0.0258849	0.0245895	0.0198915	0.00113813	0.00817334	0.00183542	-0.00186887	0.00270957	-0.0118256	0.0045118	-0.0153931
0.727	0.0230718	0.0255931	0.0257175	0.0197962	0.000998279	0.00847154	0.00195569	-0.000809256	0.00302997	-0.0126708	0.00490271	-0.0149073
0.728	0.0238267	0.0252744	0.0267906	0.0197251	0.000651294	0.00876359	0.00216782	0.000336216	0.00336943	-0.0132716	0.00505115	-0.014042
0.729	0.0245534	0.0248563	0.0276558	0.0195773	2.65e-05	0.00919759	0.002579	0.00150928	0.00355465	-0.0137079	0.00511451	-0.0129577
0.73	0.0251665	0.0243972	0.0282029	0.0191801	-0.000843303	0.00975303	0.0032099	0.0028437	0.00344346	-0.0138904	0.00509419	-0.0118535
0.731	0.0254852	0.0239332	0.0283332	0.0184732	-0.00180625	0.0103749	0.00399404	0.00427304	0.00291044	-0.0138717	0.00482917	-0.0108859
0.732	0.0253421	0.0234432	0.0279956	0.0175087	-0.00274296	0.0110144	0.00474275	0.00552034	0.00198023	-0.0137332	0.00426921	-0.0101162
0.733	0.0247174	0.0229235	0.027208	0.016375	-0.00363081	0.0115913	0.00522122	0.00639692	0.000862902	-0.0133677	0.00355108	-0.00947237
0.734	0.0237132	0.0224178	0.0260552	0.0151977	-0.00441422	0.0120322	0.0053114	0.00688743	-0.000215895	-0.0126686	0.00287414	-0.00891017
0.735	0.02251	0.0220514	0.0247025	0.0140953	-0.00495984	0.0122913	0.00499332	0.00702066	-0.00119011	-0.0117918	0.00231029	-0.0085448
0.736	0.0213213	0.0219472	0.0233074	0.0130948	-0.00519768	0.0123924	0.00426709	0.00684594	-0.00206781	-0.011027	0.00183287	-0.00846379
0.737	0.0202641	0.0221006	0.0218955	0.0121496	-0.00520398	0.0124224	0.0032563	0.00643508	-0.0026687	-0.0104607	0.00160063	-0.00856648
0.738	0.0193078	0.0224342	0.0204566	0.0112125	-0.00513161	0.0123995	0.00214389	0.00588609	-0.00273565	-0.00998516	0.00198789	-0.00868358
0.739	0.0184152	0.0228783	0.0191108	0.0103383	-0.00512959	0.0122673	0.00096331	0.00535262	-0.00244963	-0.00957864	0.00333028	-0.00880524
0.74	0.0177188	0.023378	0.0180366	0.0096195	-0.00526036	0.0120061	-0.000356622	0.00494149	-0.00226389	-0.00922606	0.0056354	-0.00905943
0.741	0.0174524	0.0239036	0.0172508	0.00900498	-0.00542916	0.0116584	-0.00187823	0.00465825	-0.00213718	-0.00873938	0.00843611	-0.00943878
0.742	0.0177477	0.0244678	0.0166126	0.00845674	-0.00542883	0.0113294	-0.0035796	0.00445088	-0.00165114	-0.00800359	0.0110309	-0.00979185
0.743	0.018644	0.0251109	0.0160566	0.00814292	-0.00509443	0.0110838	-0.00533001	0.00420875	-0.000716742	-0.00716691	0.0128811	-0.0100814
0.744	0.0201229	0.0258065	0.0156274	0.00825052	-0.00443896	0.0108213	-0.00702748	0.00382791	0.000406077	-0.00648149	0.0137319	-0.0103486
0.745	0.0219771	0.0264435	0.0153638	0.00876433	-0.0035943	0.0104008	-0.00861506	0.00324366	0.00149803	-0.00613978	0.0136217	-0.0105642
0.746	0.0238181	0.0269265	0.0153662	0.00952839	-0.00264245	0.0098153	-0.00994077	0.00237393	0.00253945	-0.00620207	0.0128247	-0.0107587
0.747	0.0253207	0.0271515	0.0158108	0.0104378	-0.00162665	0.00913007	-0.010884	0.00126691	0.00362066	-0.00659284	0.0115538	-0.0110133
0.748	0.0263374	0.0270447	0.0167215	0.011492	-0.000609462	0.00833165	-0.0115063	0.000160994	0.00471132	-0.00720382	0.00988265	-0.0112096
0.749	0.026791	0.0267137	0.0178683	0.0126912	0.000359439	0.00738756	-0.0118359	-0.000750892	0.00561363	-0.00791507	0.00793562	-0.0109738
0.75	0.026717	0.0263386	0.0189449	0.0139104	0.00123398	0.00635529	-0.0117499	-0.00140802	0.00624528	-0.00852202	0.00591671	-0.00977954
0.751	0.0263326	0.0260335	0.019747	0.0149932	0.00200792	0.00534184	-0.0111929	-0.0017898	0.00679848	-0.00883826	0.00410539	-0.00707533
0.752	0.0258262	0.0258864	0.0202322	0.0159716	0.00271419	0.00455066	-0.0103263	-0.00181385	0.00743598	-0.00885185	0.00273452	-0.00253856
0.753	0.0252931	0.0259262	0.0204833	0.0169497	0.00334459	0.00421129	-0.00943809	-0.00130678	0.00800411	-0.00866706	0.00176381	0.00373143
0.754	0.0248848	0.0260534	0.0205849	0.0179015	0.00383866	0.00434114	-0.00875297	-9.35e-05	0.00825113	-0.00832611	0.00103701	0.0112326
0.755	0.0247042	0.0260935	0.0205407	0.0187391	0.00414533	0.00483152	-0.00828676	0.00182158	0.00821357	-0.00782501	0.000573099	0.0191919
0.756	0.0246392	0.0259089	0.0202921	0.0193748	0.0043294	0.00560525	-0.00792945	0.0041237	0.00827132	-0.00729824	0.000483033	0.0267929
0.757	0.0244646	0.0254647	0.0197231	0.0196969	0.0044524	0.00656883	-0.00764936	0.00642898	0.00880431	-0.00696963	0.000759083	0.0334067
0.758	0.02405	0.0248283	0.018773	0.0196401	0.00435674	0.0076098	-0.00749587	0.00862334	0.00984598	-0.0068432	0.0012897	0.0386674
0.759	0.0234011	0.0240982	0.0175937	0.0193071	0.00378721	0.0086596	-0.00750389	0.0107209	0.0111663	-0.00659398	0.00196521	0.0424298
0.76	0.0226083	0.0233603	0.0163573	0.0188675	0.00264446	0.00970053	-0.00766267	0.0125865	0.0126154	-0.00588682	0.00267731	0.0447496
0.761	0.0218201	0.0227041	0.0150591	0.0183623	0.00109389	0.0106375	-0.00794247	0.0140403	0.0142139	-0.00469533	0.00332846	0.0458526
0.762	0.0211444	0.0222185	0.0136758	0.017749	-0.000534238	0.0112681	-0.00837114	0.0151338	0.0159118	-0.00320916	0.00391897	0.0459679
0.763	0.0206094	0.0219759	0.012316	0.0170263	-0.00194951	0.0114782	-0.00893348	0.016239	0.0174416	-0.00152586	0.00449147	0.0451631
0.764	0.0202163	0.0219766	0.0111878	0.0162658	-0.00295266	0.011318	-0.00943528	0.0177039	0.0184634	0.000454912	0.00500611	0.0434952
0.765	0.0199335	0.0221585	0.0105077	0.0155945	-0.00341461	0.0108602	-0.00970328	0.0194463	0.0188597	0.00282235	0.00537849	0.0412528
0.766	0.0197175	0.0224857	0.0103941	0.0151614	-0.00331411	0.0100985	-0.00974811	0.0211197	0.0188867	0.005384	0.00561484	0.0387964
0.767	0.0195447	0.0229155	0.0107773	0.0150271	-0.00269958	0.00903632	-0.00962664	0.0224696	0.0187041	0.0077008	0.00589011	0.0362597
0.768	0.0193455	0.0233722	0.0114409	0.0150539	-0.00161751	0.00778868	-0.0094202	0.0233839	0.0179568	0.00946676	0.0064039	0.0335398
0.769	0.0190577	0.0237714	0.0122055	0.0150539	-0.000184474	0.00657774	-0.00930277	0.0238553	0.0164125	0.0107	0.00723312	0.030485
0.77	0.0187777	0.0240594	0.0130515	0.0149677	0.00136468	0.00568515	-0.00938347	0.0239138	0.0144898	0.0115089	0.00836064	0.0271528
0.771	0.0186728	0.0243158	0.0140486	0.0147513	0.00283865	0.00530871	-0.00959212	0.0234674	0.0127358	0.0119119	0.00965931	0.0238509
0.772	0.0188222	0.0246438	0.0152014	0.0143117	0.00419285	0.00543373	-0.0098065	0.0223681	0.0112566	0.0118608	0.0109049	0.0207933
0.773	0.0192301	0.0249889	0.0163982	0.0136581	0.00541044	0.00593392	-0.0100334	0.0206989	0.00981401	0.0113481	0.0119379	0.0179841
0.774	0.0198914	0.0252306	0.0174647	0.0128911	0.00647264	0.00670944	-0.0103802	0.0187559	0.00837644	0.0105141	0.0127668	0.0154387
0.775	0.0207797	0.0253166	0.0182234	0.0120419	0.00740272	0.00765207	-0.0107507	0.0167565	0.00729936	0.00949603	0.0133786	0.0131778
0.776	0.0218299	0.0252715	0.0185707	0.0111284	0.00819452	0.00862294	-0.0108123	0.0148077	0.00677782	0.00830087	0.0135709	0.0111746
0.777	0.0229647	0.0251234	0.0185761	0.0103153	0.00892259	0.00952184	-0.0103508	0.0130082	0.00659067	0.00698764	0.0131995	0.00942292
0.778	0.0240943	0.0248749	0.0184336	0.00979925	0.00978444	0.0103175	-0.00940712	0.0113807	0.00659428	0.00575223	0.0123869	0.00795211
0.779	0.0251528	0.0245689	0.0182363	0.00959747	0.0108324	0.0110073	-0.00807534	0.00987046	0.00688949	0.00474289	0.0113797	0.00682195
0.78	0.0261271	0.0242358	0.0179682	0.00966309	0.0119858	0.0116139	-0.00625969	0.00841592	0.00743951	0.00395756	0.0103663	0.00603716
0.781	0.0269546	0.0238254	0.0176845	0.00995574	0.0131978	0.0121872	-0.00378762	0.00695883	0.0081075	0.00334257	0.00937142	0.00546113
0.782	0.0274883	0.0233459	0.0174749	0.0102947	0.0143556	0.0127706	-0.000772218	0.00551341	0.00891851	0.00282002	0.00842155	0.00490671
0.783	0.027581	0.0229142	0.0173268	0.0105623	0.0152765	0.0133762	0.00242445	0.00418563	0.00984775	0.0022706	0.00776819	0.00432855
0.784	0.0271639	0.0226036	0.0171731	0.0109026	0.015881	0.0139342	0.00544471	0.00306893	0.0105898	0.0016398	0.00756095	0.00381884
0.785	0.0263635	0.0223997	0.0169898	0.0114629	0.0161778	0.0143753	0.00795602	0.00224004	0.0107909	0.000994359	0.00756198	0.00334428
0.786	0.0254541	0.0222592	0.0167725	0.0122569	0.0161802	0.014738	0.00974382	0.00179403	0.0103235	0.000449496	0.00748001	0.00264236
0.787	0.0246026	0.022128	0.0165911	0.0132752	0.0159791	0.0150784	0.0107943	0.00174021	0.00931313	8.41e-05	0.0072913	0.0014431
0.788	0.0238322	0.0219828	0.0165671	0.0144775	0.0157217	0.0153881	0.0111125	0.00195809	0.00805978	-0.000142196	0.00716075	-0.000239534
0.789	0.0231917	0.0218459	0.0166855	0.015712	0.015422	0.0156081	0.010663	0.00233449	0.00685501	-0.00035647	0.00727097	-0.00205765
0.79	0.0228263	0.0217278	0.0168166	0.0167654	0.0148936	0.0156953	0.00951883	0.00288248	0.00582735	-0.000578801	0.00768411	-0.00362912
0.791	0.0228547	0.0215859	0.0168166	0.0174798	0.0138993	0.0156723	0.00789072	0.00374302	0.00499715	-0.000658536	0.00816869	-0.00481757
0.792	0.0232236	0.0213563	0.0165822	0.0177634	0.0123657	0.0155886	0.00601958	0.00504717	0.00442692	-0.000396277	0.00838869	-0.00564837
0.793	0.0237912	0.0210332	0.0160993	0.0175857	0.0104468	0.0154365	0.00409128	0.00670449	0.00417982	0.000361579	0.00828817	-0.0060495
0.794	0.0244162	0.020641	0.0154013	0.0170115	0.00842059	0.0150473	0.00219067	0.00847375	0.00412238	0.00163823	0.00801583	-0.00580973
0.795	0.0249531	0.0202146	0.0145955	0.0161494	0.00659999	0.0142577	0.00040693	0.0101963	0.00403383	0.00326526	0.00767658	-0.00484585
0.796	0.0253462	0.0198907	0.0139051	0.0151492	0.00523969	0.0131863	-0.00102074	0.0117136	0.00389155	0.00496843	0.00725451	-0.00346247
0.797	0.0256203	0.0197983	0.0135675	0.0142359	0.00446323	0.0120546	-0.00190982	0.0128043	0.00386389	0.00651881	0.00667348	-0.00217609
0.798	0.0257911	0.0199291	0.0137284	0.0135754	0.00431992	0.0109266	-0.00233701	0.0133721	0.00410316	0.00779405	0.00596112	-0.00129308
0.799	0.0258988	0.0202011	0.0143647	0.0132189	0.0047503	0.00978796	-0.00240286	0.0134745	0.00456395	0.00878453	0.00525125	-0.000853928
0.8	0.0259822	0.0205087	0.0152672	0.013172	0.00549142	0.00863308	-0.00213422	0.013221	0.00508185	0.00955967	0.00464969	-0.000760371
0.801	0.0260149	0.0207687	0.0161978	0.0133823	0.00622245	0.0074584	-0.00165207	0.0126609	0.00562724	0.0101231	0.00420837	-0.000804953
0.802	0.0259561	0.0209522	0.01703	0.0137896	0.00673496	0.00634365	-0.00103858	0.0117273	0.00631197	0.0103852	0.00395465	-0.000835482
0.803	0.0257901	0.0211199	0.0177424	0.0143813	0.00686916	0.00546345	-0.000221714	0.0104008	0.00720154	0.0102257	0.00391689	-0.000838625
0.804	0.025527	0.0214058	0.0183231	0.0151418	0.00652144	0.0049549	0.000764653	0.00880688	0.00815332	0.00944927	0.00412996	-0.000836753
0.805	0.0251766	0.0218622	0.0186556	0.0160334	0.00583524	0.00487849	0.00162418	0.00709613	0.00895759	0.00797173	0.00455151	-0.000868335
0.806	0.0247528	0.0224098	0.0185894	0.0169608	0.00511825	0.00521729	0.0019822	0.00543004	0.00973291	0.00604333	0.00506205	-0.000944902
0.807	0.0243604	0.022959	0.018092	0.0177877	0.0045882	0.00586896	0.00167283	0.0039382	0.0107831	0.00401711	0.00563694	-0.0010426
0.808	0.0242076	0.0234714	0.0172455	0.0184917	0.00442185	0.00674758	0.000882166	0.00255298	0.0120384	0.00213003	0.0062706	-0.0012027
0.809	0.0244983	0.0238679	0.0162083	0.0191642	0.00478626	0.00777496	2.88e-06	0.00118966	0.0130102	0.00054423	0.00671591	-0.00144242
0.81	0.0252709	0.0240503	0.0151697	0.0198611	0.00566446	0.00882129	-0.000613	1.69e-06	0.0133135	-0.000672631	0.0066534	-0.00168078
0.811	0.0263187	0.0240572	0.0142769	0.0205815	0.00690981	0.00982026	-0.000721851	-0.000810937	0.013137	-0.00154668	0.0060642	-0.00181767
0.812	0.0273562	0.0240287	0.0136203	0.021331	0.00843977	0.0107678	-0.000186029	-0.00114402	0.0130301	-0.002103	0.0051743	-0.0017291
0.813	0.0282122	0.0240338	0.013261	0.0221208	0.0101624	0.011606	0.00096838	-0.000925189	0.0132743	-0.00232209	0.00418728	-0.00131138
0.814	0.0287857	0.024049	0.0132883	0.0229405	0.0118227	0.0123069	0.00253981	-0.000195409	0.0137636	-0.00225612	0.00326219	-0.000559709
0.815	0.0289701	0.0240824	0.0137635	0.0237725	0.0131439	0.0129464	0.00419546	0.000970962	0.014375	-0.00209462	0.00258538	0.00043649
0.816	0.028731	0.0241461	0.0146293	0.0245793	0.0140494	0.0136026	0.00563096	0.00265153	0.0150677	-0.00193663	0.00231206	0.0015662
0.817	0.0281496	0.0240933	0.015801	0.025248	0.0146367	0.0143477	0.00679892	0.00490117	0.0157376	-0.00162754	0.00252477	0.00278522
0.818	0.0273363	0.0237409	0.0172094	0.0256587	0.0150241	0.0152683	0.00783079	0.00758327	0.0162616	-0.000939126	0.00324498	0.00398544
0.819	0.0264109	0.0231251	0.018731	0.0258471	0.0152442	0.0163729	0.00877247	0.0104714	0.016493	0.00020513	0.00437315	0.00487359
0.82	0.0255623	0.0224292	0.0201498	0.0259792	0.0152472	0.0176045	0.00952056	0.0132693	0.0161589	0.00172103	0.0057161	0.00522647
0.821	0.0249077	0.0217742	0.0212359	0.0261187	0.0149802	0.0189278	0.00986632	0.0156186	0.0150763	0.00348593	0.00705928	0.00509639
0.822	0.0243214	0.021186	0.0219383	0.0261251	0.0144429	0.0202661	0.00960093	0.0172907	0.0133993	0.00536008	0.0081798	0.00464574
0.823	0.0235894	0.0206756	0.0223429	0.0258419	0.0137062	0.0214385	0.0087055	0.0182384	0.0113584	0.00713709	0.00898526	0.00398874
0.824	0.0226788	0.0203021	0.0224264	0.0252204	0.0128888	0.0222812	0.00737165	0.0184642	0.00909153	0.00863107	0.00956107	0.00323291
0.825	0.0217871	0.0201423	0.0220996	0.0242467	0.0120651	0.0227245	0.00575076	0.0180211	0.0068251	0.0096912	0.0100626	0.00249216
0.826	0.0211742	0.0202047	0.0214001	0.0229426	0.0112651	0.0227638	0.00385195	0.0171189	0.00474321	0.0102269	0.0106889	0.0018459
0.827	0.0209807	0.0204439	0.0204476	0.0213837	0.0105793	0.0224799	0.00181327	0.0161033	0.00286382	0.0103847	0.0115924	0.00143836
0.828	0.021163	0.0207954	0.0193435	0.0196843	0.0100895	0.0219878	-5.14e-07	0.0152452	0.00119061	0.0103676	0.0127844	0.00147489
0.829	0.0215287	0.0211867	0.0182173	0.0180299	0.00979465	0.0213109	-0.0012654	0.014595	-0.000259775	0.010156	0.0142048	0.00190439
0.83	0.0218459	0.021624	0.0172151	0.0165997	0.00977441	0.0204172	-0.00189429	0.0140965	-0.00138626	0.00971171	0.0157243	0.00234136
0.831	0.0219612	0.0221494	0.016421	0.0154771	0.0102119	0.0193174	-0.0020449	0.0137367	-0.00180555	0.00914451	0.0170412	0.00243292
0.832	0.021858	0.0227209	0.0158924	0.0146947	0.0111622	0.0180633	-0.00199135	0.0134615	-0.00111501	0.00845772	0.017711	0.00210961
0.833	0.0216146	0.0232744	0.0156547	0.0143123	0.0125118	0.016806	-0.00190087	0.0130818	0.000527223	0.00747096	0.0173843	0.00150495
0.834	0.021301	0.0237913	0.0156471	0.0144238	0.0141299	0.01577	-0.00169598	0.0125054	0.00259742	0.00610729	0.0160503	0.000815785
0.835	0.0209158	0.024236	0.0157695	0.0150211	0.0158659	0.0150615	-0.00114888	0.0119702	0.00491062	0.00454109	0.0139881	0.000284975
0.836	0.0204029	0.024497	0.0159483	0.0159945	0.0175686	0.014691	-7.53e-05	0.0118647	0.00763277	0.0031466	0.0115182	0.000132394
0.837	0.019758	0.0244522	0.0161584	0.0172828	0.0191413	0.0147007	0.00158966	0.0123657	0.0106748	0.00228721	0.00887873	0.000350051
0.838	0.0191075	0.0240974	0.0163552	0.0187182	0.0204395	0.0151283	0.00376227	0.013319	0.0133516	0.00198222	0.00627333	0.000705206
0.839	0.0186784	0.0235137	0.0164495	0.0199072	0.0212899	0.0159717	0.00620899	0.0144192	0.0149199	0.00201178	0.00397681	0.000973415
0.84	0.0186788	0.0227553	0.0164127	0.0205281	0.0215561	0.0171949	0.00868605	0.0154694	0.0153487	0.00236083	0.00228733	0.00105183
0.841	0.0191836	0.0218811	0.0162668	0.0205862	0.0212122	0.018714	0.0109653	0.0164951	0.0150826	0.00320649	0.00128765	0.00100181
0.842	0.0201086	0.0210028	0.0160709	0.0203656	0.0204639	0.0203907	0.0127219	0.0175667	0.0143618	0.00459707	0.000804318	0.00101107
0.843	0.0212239	0.0202042	0.0159602	0.0201489	0.0195699	0.0220286	0.0137353	0.0185913	0.0132447	0.00636397	0.00064233	0.00117867
0.844	0.0222487	0.0195304	0.0160161	0.0199653	0.0186936	0.0234018	0.0141198	0.019402	0.0119265	0.00823348	0.000650995	0.00147302
0.845	0.0229886	0.0191002	0.0162027	0.0197157	0.0179842	0.0243533	0.0142153	0.0198906	0.0107348	0.00995848	0.000649393	0.00182387
0.846	0.0234206	0.0190536	0.0164533	0.0194064	0.0174964	0.0248419	0.0143277	0.020017	0.0099986	0.0113796	0.000550065	0.00206731
0.847	0.0236599	0.0193628	0.0166994	0.0191224	0.0171338	0.0248411	0.0145266	0.019813	0.00991134	0.0123794	0.000499177	0.00197728
0.848	0.0238178	0.019884	0.0169142	0.0189934	0.0167665	0.0243513	0.0147551	0.0193669	0.0104241	0.0128331	0.000775913	0.00148792
0.849	0.0239313	0.0205444	0.0171492	0.0191885	0.0163234	0.02352	0.0149477	0.0187466	0.011488	0.0126893	0.00149301	0.000751215
0.85	0.0239495	0.0212526	0.0174642	0.0197459	0.0158352	0.0224764	0.0149223	0.0179448	0.0132738	0.0119898	0.0024794	-0.000101561
0.851	0.0237176	0.0218007	0.0178729	0.0205208	0.0154316	0.0211905	0.0144718	0.0169122	0.0157814	0.0107593	0.00354427	-0.00106852
0.852	0.0231184	0.0220609	0.0183495	0.0212853	0.0152644	0.0197163	0.0135831	0.0156147	0.0184418	0.00899671	0.00457299	-0.0020813
0.853	0.0222636	0.0220572	0.0188342	0.0217914	0.015346	0.0182601	0.0123954	0.0141442	0.020464	0.00678071	0.00541542	-0.00291511
0.854	0.0214111	0.0218305	0.0191979	0.0218929	0.0155292	0.0169337	0.0110545	0.012718	0.0215067	0.00439122	0.00603789	-0.00336654
0.855	0.0207765	0.0214528	0.0192838	0.0215904	0.0157326	0.0157285	0.00970786	0.011438	0.0218026	0.00222582	0.0065706	-0.00344594
0.856	0.0204932	0.0210505	0.0190586	0.020927	0.0159793	0.0146883	0.00850311	0.0101876	0.0215917	0.000504951	0.00704198	-0.00336223
0.857	0.020595	0.0206814	0.0186443	0.0199565	0.0162441	0.0139604	0.00757549	0.0088411	0.0206648	-0.000836551	0.00734263	-0.00327262
0.858	0.0209976	0.0203027	0.0182661	0.0187937	0.0165384	0.0137196	0.00709929	0.00751237	0.0188146	-0.00182017	0.00733071	-0.00315659
0.859	0.0215436	0.019887	0.0181441	0.0176151	0.0170087	0.0139878	0.00718757	0.00650091	0.0164156	-0.00215048	0.00679224	-0.00305375
0.86	0.0220655	0.0195046	0.0182747	0.0166033	0.0177352	0.0145358	0.0077633	0.00590244	0.0140848	-0.00167315	0.00563776	-0.00320363
0.861	0.0224284	0.0192894	0.0184346	0.0159303	0.0185876	0.0150765	0.00868427	0.00551195	0.0121841	-0.000835843	0.0041436	-0.00379215
0.862	0.022592	0.0193285	0.0184197	0.0157201	0.019371	0.015468	0.00982908	0.00526415	0.0109217	-0.000284356	0.00274769	-0.00473836
0.863	0.0226466	0.0196144	0.0181489	0.0159077	0.0200099	0.015786	0.0110395	0.00538772	0.0104588	-0.000222108	0.00174646	-0.00580722
0.864	0.022709	0.0200812	0.0176384	0.016293	0.0205831	0.0163208	0.0121723	0.00599202	0.0107877	-0.000349455	0.00124551	-0.00681019
0.865	0.0228168	0.0206439	0.0169853	0.0168489	0.0212057	0.0173328	0.0131169	0.0069383	0.011731	-0.00033077	0.00122302	-0.0076252
0.866	0.0229922	0.0212127	0.0163568	0.0177167	0.0218514	0.0188026	0.0137443	0.00815113	0.0129528	-0.000110969	0.00164406	-0.00808296
0.867	0.0232858	0.0216779	0.0159564	0.0189318	0.02237	0.0204655	0.0140213	0.00965556	0.0141239	0.000273818	0.00257923	-0.00803127
0.868	0.0236907	0.0219659	0.015908	0.0203492	0.0226313	0.0219276	0.0140153	0.0114092	0.0152405	0.000891357	0.0040859	-0.00747008
0.869	0.0241933	0.0220841	0.0162054	0.021736	0.0225318	0.0228138	0.0137378	0.0133706	0.0164299	0.00177263	0.0060383	-0.00646629
0.87	0.0248653	0.0220752	0.0168284	0.0229177	0.0220601	0.0230148	0.01319	0.0155551	0.0175415	0.00287075	0.00820879	-0.0051495
0.871	0.0257468	0.0220236	0.0177932	0.0238684	0.0213376	0.0227153	0.012403	0.0178825	0.018299	0.00421315	0.0103264	-0.00373155
0.872	0.0267442	0.0220364	0.0190914	0.0245981	0.0203872	0.0221063	0.0114034	0.0201154	0.0186814	0.00580208	0.0120683	-0.00233473
0.873	0.0276394	0.0221248	0.0206179	0.0250808	0.0190523	0.0212937	0.0103052	0.0219737	0.0189114	0.00746157	0.0132324	-0.00103151
0.874	0.0281953	0.0221679	0.0221248	0.0254279	0.0172364	0.0204391	0.00926672	0.0233603	0.0191226	0.00899833	0.013884	4.44e-05
0.875	0.0283737	0.0220477	0.0233742	0.0258827	0.0150652	0.0196578	0.00837731	0.0244505	0.0192176	0.0103089	0.0141707	0.000798106
0.876	0.0283489	0.0217887	0.024286	0.0265383	0.0127998	0.0188678	0.00773666	0.0253708	0.0190953	0.0113198	0.0140402	0.00120126
0.877	0.0282931	0.0214952	0.024801	0.0272951	0.0106406	0.0179048	0.0073939	0.0260312	0.018878	0.0121013	0.013332	0.00121029
0.878	0.0282962	0.0212526	0.0248632	0.0279691	0.00869327	0.0166791	0.00721746	0.0264	0.0188368	0.0129325	0.0120547	0.000751536
0.879	0.0283647	0.0211532	0.0246017	0.0283915	0.00712269	0.0152287	0.0070119	0.0265833	0.0191082	0.0140539	0.0104672	-0.0001405
0.88	0.0283846	0.0212327	0.0242349	0.0285593	0.00614265	0.0137045	0.00676318	0.0266952	0.0194983	0.015429	0.00899987	-0.00119484
0.881	0.0281609	0.0214288	0.0238461	0.0285717	0.00578414	0.0122835	0.00666	0.0268959	0.0196022	0.0167836	0.00795862	-0.00206223
0.882	0.0275949	0.0216733	0.0234436	0.028476	0.00588481	0.0110311	0.00673386	0.0273313	0.0191739	0.0178364	0.00735109	-0.00259515
0.883	0.0268298	0.0219029	0.023117	0.0282923	0.00636789	0.00991809	0.00685779	0.0279304	0.0183971	0.0184464	0.00711112	-0.00292136
0.884	0.0261192	0.0220807	0.0229925	0.0280324	0.00729962	0.00901368	0.00710599	0.0284792	0.017689	0.0185215	0.0071743	-0.00327315
0.885	0.0256148	0.0222711	0.0231534	0.0276932	0.00866272	0.00854309	0.00761727	0.0288651	0.017194	0.0180018	0.00741234	-0.00371081
0.886	0.0253551	0.022554	0.0236462	0.0272767	0.0103102	0.00873	0.00832219	0.0290894	0.0166984	0.0169661	0.00771681	-0.00409701
0.887	0.0253006	0.0228679	0.0243988	0.0267636	0.0121686	0.00961895	0.00906011	0.0290769	0.0160041	0.0155646	0.00803246	-0.00431975
0.888	0.0253115	0.023043	0.0251913	0.0261278	0.0142566	0.0111073	0.0097794	0.02865	0.0150743	0.0139407	0.00834323	-0.00428829
0.889	0.0252563	0.0230113	0.0258163	0.0253793	0.0164603	0.0130953	0.0105565	0.0277764	0.0139984	0.012168	0.0086414	-0.00390076
0.89	0.0251639	0.0228645	0.026168	0.0245523	0.0184974	0.0154274	0.0114471	0.0267518	0.0129679	0.0103322	0.00889551	-0.00326329
0.891	0.0251824	0.0226781	0.0261854	0.0237022	0.020086	0.0177988	0.0123892	0.0260066	0.0121582	0.0087662	0.0090704	-0.00269498
0.892	0.0254563	0.0224721	0.0258882	0.0228924	0.0210626	0.0199313	0.0133582	0.0256942	0.0116071	0.00785754	0.00911706	-0.00241747
0.893	0.026033	0.0223126	0.0254396	0.0221771	0.0213928	0.0216711	0.0144883	0.0255791	0.0112463	0.00767104	0.00899239	-0.00243839
0.894	0.0268464	0.0222361	0.0250346	0.0215968	0.0211599	0.0229006	0.0159101	0.0253903	0.0111439	0.00794877	0.00869206	-0.00264724
0.895	0.0277812	0.0222043	0.0247474	0.0211679	0.0206039	0.0236052	0.0175839	0.0251456	0.0115475	0.00837744	0.00827025	-0.00281843
0.896	0.0286825	0.0222583	0.0244901	0.0209553	0.0200642	0.0239458	0.0193457	0.0250228	0.0125075	0.0088265	0.00780778	-0.00249708
0.897	0.0293593	0.0224401	0.0241513	0.021058	0.0197831	0.0241527	0.0210222	0.0250401	0.0136876	0.00929825	0.0073528	-0.000927903
0.898	0.0296211	0.0226475	0.0238347	0.0214319	0.0198098	0.0243799	0.022479	0.0250291	0.014719	0.00977994	0.00706968	0.00260326
0.899	0.0293573	0.0227992	0.0238138	0.0219051	0.0200692	0.0246389	0.0236517	0.0249043	0.0156046	0.0103224	0.00722495	0.00823714
0.9	0.028612	0.0228855	0.0242208	0.0224024	0.0204284	0.0248736	0.0245392	0.0247936	0.0164374	0.0110501	0.00784238	0.0154869
0.901	0.0275202	0.0229376	0.0249147	0.0229759	0.0207508	0.0250741	0.0250997	0.0248024	0.0168522	0.0119689	0.00869184	0.0234971
0.902	0.026237	0.02309	0.0256183	0.0235708	0.0209685	0.0252316	0.0251942	0.0248896	0.0163802	0.0129611	0.00953713	0.0312253
0.903	0.0249262	0.0235154	0.0261367	0.0239936	0.0210693	0.0253398	0.0246657	0.0250906	0.01515	0.0139384	0.0101745	0.0377468
0.904	0.023746	0.024318	0.0264531	0.0241843	0.0210453	0.0254879	0.0234749	0.0255077	0.0135561	0.0148851	0.0104644	0.0426548
0.905	0.0228532	0.0254321	0.0266523	0.0242632	0.0208283	0.0257371	0.021777	0.0260827	0.0116399	0.0158117	0.0104208	0.0460582
0.906	0.0223722	0.0266332	0.0267722	0.0243632	0.0202472	0.0260004	0.0198029	0.0266799	0.00939674	0.0167347	0.0102005	0.0481941
0.907	0.0222842	0.0276699	0.0267041	0.0245902	0.0192733	0.0261538	0.0177733	0.0272434	0.00717866	0.0176457	0.0100116	0.0491255
0.908	0.0224249	0.0283621	0.0262769	0.0250005	0.018218	0.02612	0.0159781	0.0278274	0.00550166	0.0184762	0.00995057	0.0487164
0.909	0.0227023	0.0286595	0.0254541	0.025586	0.0173673	0.0258474	0.0146555	0.028566	0.0047096	0.0191631	0.00995664	0.04683
0.91	0.0231571	0.0285739	0.024418	0.0262647	0.0166072	0.0252839	0.0137997	0.0294191	0.00479592	0.0196946	0.0100106	0.0435034
0.911	0.0237765	0.0281321	0.0234771	0.0267875	0.0156755	0.0244432	0.0132905	0.0300234	0.00559978	0.0200436	0.0102347	0.0389353
0.912	0.0244432	0.0274215	0.0228968	0.0268312	0.0146031	0.0235076	0.0130881	0.0300317	0.00701997	0.0201161	0.0106992	0.0334899
0.913	0.0250362	0.0265448	0.0227722	0.0262764	0.0136865	0.0227672	0.0132345	0.0294022	0.00880536	0.0198756	0.0112025	0.0277126
0.914	0.0255093	0.0256069	0.0230471	0.0253266	0.0132758	0.0223711	0.0138233	0.0282428	0.0105176	0.0194316	0.0113622	0.0221017
0.915	0.0258505	0.0247452	0.0235874	0.0243575	0.013672	0.0221507	0.0148718	0.0267164	0.0119231	0.0188432	0.010947	0.0167718
0.916	0.0260155	0.02405	0.02424	0.0236456	0.0149321	0.0218171	0.0161957	0.0250982	0.0130763	0.0180827	0.0100172	0.0115112
0.917	0.0259819	0.0235445	0.024908	0.0232386	0.0168412	0.0212688	0.0175812	0.0235955	0.0140059	0.0172204	0.0087917	0.00633838
0.918	0.0257876	0.0232714	0.0255998	0.0230492	0.0191088	0.0205934	0.0189147	0.0221826	0.0146139	0.0163459	0.00744044	0.00171106
0.919	0.0255012	0.0232619	0.0263745	0.0230279	0.0214389	0.0199662	0.0200861	0.0207486	0.0147927	0.0154551	0.00608003	-0.00195693
0.92	0.0251892	0.0234528	0.0271716	0.0232556	0.0236077	0.0196546	0.0209575	0.0193184	0.0145016	0.0145315	0.00496035	-0.00458195
0.921	0.0248792	0.0237236	0.0277935	0.0238104	0.0255379	0.0199392	0.0214575	0.0181153	0.0137486	0.0136145	0.00433707	-0.0061697
0.922	0.0245745	0.0239638	0.0280554	0.0245548	0.0271313	0.0209487	0.0216048	0.0174029	0.0125548	0.0128192	0.00426056	-0.00661574
0.923	0.024294	0.0240614	0.0278834	0.0252253	0.0282447	0.0225678	0.0214574	0.0171537	0.0110518	0.0122791	0.00468938	-0.00586778
0.924	0.024103	0.0239478	0.0273445	0.0256356	0.02887	0.0244751	0.0210744	0.0169717	0.00952642	0.0120173	0.00556033	-0.0041538
0.925	0.0240801	0.0236915	0.0265957	0.0257193	0.0291246	0.0263278	0.020491	0.0164713	0.00824351	0.0119116	0.00663816	-0.00191645
0.926	0.024186	0.023369	0.0257881	0.0255387	0.0291333	0.0279191	0.0198255	0.0156053	0.00734106	0.011867	0.00752329	0.000405112
0.927	0.0243097	0.0229893	0.0249847	0.0252221	0.0289107	0.0291558	0.0192967	0.0145989	0.00701721	0.0119774	0.00797904	0.00249726
0.928	0.0244425	0.0226328	0.0241741	0.0248744	0.028342	0.029963	0.0189445	0.0137359	0.00750625	0.0123761	0.00810031	0.00420139
0.929	0.0246305	0.0223991	0.0233738	0.0245972	0.0273965	0.0302885	0.018627	0.0131866	0.00869011	0.0130825	0.00811647	0.00549759
0.93	0.0248388	0.0223338	0.0226361	0.0244928	0.0263151	0.030206	0.0183414	0.0128976	0.0101818	0.0140894	0.00814492	0.00645558
0.931	0.0249598	0.0225027	0.0219938	0.0245802	0.02548	0.0298672	0.0181476	0.012716	0.0118026	0.0153257	0.00817933	0.00719862
0.932	0.0249416	0.0229275	0.0214627	0.0248158	0.0251174	0.0293841	0.0179811	0.0125649	0.0135725	0.0165277	0.00827012	0.00780033
0.933	0.0248348	0.0234942	0.0210965	0.025221	0.0252298	0.0288579	0.0178336	0.0124326	0.0154778	0.0174322	0.00847504	0.00816098
0.934	0.0247066	0.0240544	0.0209876	0.0258895	0.0256743	0.0283311	0.0178195	0.01235	0.0175299	0.0179773	0.00869758	0.00815196
0.935	0.0245581	0.0245503	0.0211603	0.0268238	0.0261869	0.0277978	0.0179859	0.0123916	0.0198301	0.0182065	0.00884933	0.00782504
0.936	0.0243036	0.0250111	0.0215784	0.0278533	0.0265173	0.0273717	0.0181966	0.0126276	0.0224858	0.0182024	0.00903329	0.00731356
0.937	0.0239104	0.0254649	0.022272	0.0288357	0.0265605	0.0271677	0.0182282	0.0130374	0.0254004	0.018022	0.00943223	0.00671044
0.938	0.0235218	0.0258432	0.0232445	0.0297454	0.0263832	0.027144	0.0180146	0.0134852	0.028143	0.0175501	0.0101643	0.00617639
0.939	0.0232853	0.0260481	0.0243379	0.0305095	0.0261323	0.0272845	0.0177026	0.0137833	0.0302335	0.0166021	0.0112193	0.0059735
0.94	0.0231903	0.0260868	0.0253897	0.030995	0.0258277	0.0276104	0.0173429	0.0137529	0.0315297	0.0151252	0.0124206	0.00630839
0.941	0.0231702	0.0260253	0.0263018	0.0311021	0.025391	0.0280008	0.0167041	0.0132995	0.0322066	0.0132117	0.0135341	0.00724026
0.942	0.0232131	0.0258804	0.0268944	0.030771	0.0248233	0.0283108	0.0156193	0.012444	0.0324066	0.0110547	0.0144142	0.00870591
0.943	0.0233622	0.0255537	0.02692	0.0299994	0.0241779	0.0284744	0.014351	0.0113382	0.0320139	0.00885418	0.0149093	0.0104587
0.944	0.0236966	0.0248959	0.0262602	0.0288784	0.0234794	0.0284282	0.0133366	0.0102845	0.0308161	0.00680698	0.0147946	0.0120592
0.945	0.0242256	0.0239278	0.0250704	0.0275663	0.0227971	0.0281824	0.0127612	0.00954617	0.0288105	0.00516265	0.0140022	0.0131425
0.946	0.0247902	0.0228653	0.023702	0.0262443	0.0222187	0.0277936	0.0125519	0.00922692	0.026225	0.00407842	0.0126905	0.013596
0.947	0.0251403	0.021901	0.0224533	0.02507	0.0217385	0.027202	0.0125886	0.0093992	0.0232671	0.00350637	0.0110776	0.0134932
0.948	0.0251191	0.0211394	0.0214663	0.0242126	0.0213883	0.0263542	0.0128434	0.0100941	0.02	0.0032766	0.0094127	0.0130614
0.949	0.0247861	0.0206594	0.0208595	0.0238459	0.0212789	0.025346	0.0133143	0.011238	0.0165379	0.00323945	0.00792586	0.012605
0.95	0.024341	0.0204652	0.0207326	0.0239533	0.0214247	0.0243103	0.0138641	0.0127562	0.0131845	0.00334188	0.00673143	0.0123075
0.951	0.0240371	0.0204438	0.0210474	0.0243709	0.0217401	0.0233345	0.0142967	0.0146416	0.0102532	0.00359354	0.00591916	0.0120966
0.952	0.024086	0.0204457	0.0216946	0.0249747	0.0221458	0.022535	0.0145209	0.0168304	0.00792194	0.00401055	0.00559643	0.011728
0.953	0.0244887	0.0203884	0.022534	0.0255859	0.0225225	0.0220572	0.0145075	0.0191084	0.00627317	0.00452152	0.00574341	0.0110644
0.954	0.0251038	0.0202998	0.0233276	0.0260425	0.0227133	0.0219498	0.0142511	0.0212229	0.00541523	0.0050012	0.0061942	0.0102356
0.955	0.0257726	0.0202529	0.0238478	0.0263865	0.0226888	0.0222023	0.0138243	0.0230014	0.00549624	0.00541295	0.006739	0.00948879
0.956	0.0263141	0.020282	0.0239984	0.026644	0.0224663	0.0227585	0.0132693	0.0243783	0.00647029	0.00576643	0.00715962	0.00893964
0.957	0.0266476	0.0203795	0.0237782	0.0266684	0.02191	0.0234388	0.0124576	0.0253521	0.00800752	0.00603322	0.00731004	0.00853973
0.958	0.0268354	0.0205301	0.0232305	0.0263164	0.0208242	0.024089	0.0112303	0.0259168	0.00973594	0.00625167	0.00725629	0.00824509
0.959	0.0269039	0.0207703	0.0223836	0.0254821	0.0191464	0.0246458	0.00960589	0.0261111	0.0114546	0.00659504	0.00719884	0.00801758
0.96	0.026826	0.0211202	0.0212756	0.0241161	0.0170909	0.0250456	0.00781817	0.0260455	0.0130881	0.00717501	0.00717607	0.00770022
0.961	0.0266128	0.0215272	0.0201093	0.0224172	0.0150735	0.0252775	0.00618061	0.0257414	0.0145995	0.00793551	0.0070307	0.00701111
0.962	0.0262895	0.0219645	0.019242	0.0207268	0.0134125	0.0253863	0.00486297	0.0250944	0.0160207	0.0087383	0.00669525	0.00570019
0.963	0.0258919	0.0223815	0.0188987	0.019224	0.0123267	0.0254208	0.0038765	0.0239994	0.0173738	0.00938211	0.00633708	0.00374863
0.964	0.0254657	0.0226779	0.019011	0.0179546	0.01198	0.025431	0.00327561	0.0223606	0.0186151	0.00970359	0.00614149	0.00132232
0.965	0.0250342	0.0228356	0.0194232	0.0169298	0.0122903	0.0253544	0.00322102	0.0201351	0.0197076	0.00964813	0.00604573	-0.00130746
0.966	0.0246536	0.022871	0.0200614	0.0160542	0.0130445	0.0250381	0.00378865	0.017438	0.0205489	0.00918339	0.00592023	-0.00377505
0.967	0.0244335	0.0227125	0.0208596	0.0152179	0.0141477	0.0244738	0.00488494	0.0145491	0.0209362	0.00839502	0.00591343	-0.00578408
0.968	0.0243787	0.0223223	0.0217241	0.01441	0.0155398	0.0237994	0.0063782	0.0118798	0.0207292	0.00754926	0.00634694	-0.00712564
0.969	0.0243967	0.021861	0.0226129	0.0136136	0.0171025	0.0231558	0.00816561	0.00982541	0.0199268	0.00691112	0.00735937	-0.00762927
0.97	0.0245503	0.0215854	0.0235464	0.0128035	0.0187361	0.0226472	0.0101741	0.008572	0.0186311	0.00664534	0.00879007	-0.00730926
0.971	0.0250094	0.0216176	0.0244782	0.0120754	0.0202957	0.0223078	0.0123255	0.00811385	0.0169819	0.0067586	0.0103569	-0.00642457
0.972	0.0257907	0.0218359	0.0252661	0.011645	0.0215339	0.0221299	0.0144571	0.00837349	0.0150656	0.00703461	0.0118662	-0.00527605
0.973	0.0267713	0.0220313	0.0258357	0.0116853	0.0223191	0.0221248	0.0163436	0.0092254	0.0130012	0.00723394	0.0131766	-0.00401954
0.974	0.0278511	0.0221574	0.0262374	0.0121467	0.0227421	0.0222829	0.0177803	0.0104884	0.0109605	0.00738629	0.014139	-0.0027964
0.975	0.0289861	0.0223289	0.0264783	0.01278	0.0229753	0.0225217	0.0186709	0.0120036	0.0088981	0.00768012	0.0147654	-0.00171678
0.976	0.0300679	0.0226374	0.0264931	0.0133595	0.0232118	0.0227254	0.0191429	0.0136542	0.00668178	0.00820825	0.0151887	-0.00070468
0.977	0.0308802	0.023106	0.02634	0.0138513	0.0235853	0.0228103	0.0195049	0.0153216	0.00453491	0.00901689	0.0154235	0.000243827
0.978	0.0312924	0.0237698	0.0261797	0.01433	0.0240033	0.0227424	0.0199537	0.0169239	0.00287518	0.0101479	0.0154052	0.000940185
0.979	0.0313717	0.0246171	0.0260911	0.0148075	0.0242419	0.0225402	0.0204056	0.0183078	0.0017869	0.0115391	0.0151449	0.0013056
0.98	0.0312299	0.0255121	0.0260312	0.0153383	0.024271	0.0221886	0.0207241	0.0191493	0.00103789	0.0129977	0.0147944	0.00168874
0.981	0.0308824	0.0262633	0.025945	0.0161129	0.0242534	0.0215675	0.0208949	0.0192556	0.000601798	0.014168	0.0145913	0.0029432
0.982	0.0302953	0.0266709	0.0258827	0.0172297	0.0242457	0.0206415	0.0209598	0.0188092	0.000694673	0.0146284	0.0146211	0.00598216
0.983	0.0294339	0.0266102	0.0259098	0.018551	0.0241768	0.0195836	0.020987	0.0181802	0.00132478	0.0142437	0.0147014	0.0111688
0.984	0.028259	0.0261531	0.0259709	0.0197754	0.0240117	0.0186279	0.0209987	0.0176712	0.00221751	0.0132639	0.0146858	0.0181425
0.985	0.026801	0.0255128	0.0259678	0.0206018	0.0237632	0.0178925	0.0209421	0.017487	0.00310787	0.012021	0.0147057	0.0260728
0.986	0.0251515	0.0248459	0.0259346	0.020945	0.0234218	0.0173538	0.0208218	0.0177892	0.0039527	0.0107191	0.014866	0.0340311
0.987	0.0234124	0.024203	0.0260676	0.0209534	0.0229218	0.0169925	0.0206591	0.0186393	0.00480419	0.00948274	0.0150968	0.0412246
0.988	0.0217862	0.0236413	0.0265161	0.020799	0.0221983	0.0168383	0.0203675	0.0199025	0.0055661	0.00834625	0.0153864	0.0471601
0.989	0.0205915	0.0232819	0.0272069	0.020573	0.0212454	0.0169159	0.0198404	0.0212819	0.00605238	0.00715995	0.0157105	0.0517034
0.99	0.0200855	0.0232514	0.027923	0.0202723	0.0200906	0.017209	0.0190466	0.0225017	0.0062121	0.00574547	0.0159404	0.054832
0.991	0.0203017	0.023533	0.0283998	0.0197756	0.0187621	0.0175918	0.0179905	0.0234638	0.00617661	0.00416746	0.0160521	0.05639
0.992	0.0210818	0.0239585	0.0284033	0.0190307	0.0173549	0.0179065	0.0167232	0.0242132	0.00613894	0.00277372	0.0161568	0.056123
0.993	0.0222217	0.0243609	0.0278948	0.0182117	0.0160513	0.0180744	0.0154554	0.0247891	0.00621772	0.00200413	0.0162458	0.0538118
0.994	0.0235192	0.0246233	0.0270675	0.0175289	0.0149462	0.0180846	0.0145132	0.0251521	0.00641425	0.00207816	0.0160966	0.0494843
0.995	0.0247861	0.0247144	0.0261527	0.0170474	0.0139635	0.0180148	0.0141957	0.0252017	0.00671987	0.00290116	0.0155158	0.0435977
0.996	0.0259153	0.0247016	0.0252253	0.0167895	0.0129839	0.0179669	0.0146961	0.0248962	0.00717833	0.00427687	0.0144608	0.0368304
0.997	0.0268534	0.02462	0.0243041	0.0167798	0.0120106	0.0178973	0.0159141	0.0243458	0.00775952	0.00604617	0.0130049	0.0297599
0.998	0.0275426	0.0244702	0.0235451	0.0169282	0.0112147	0.0176543	0.0173832	0.023725	0.00828079	0.00808569	0.0114225	0.0228356
0.999	0.0279588	0.0243167	0.023112	0.0170952	0.010715	0.0171679	0.0185955	0.023195	0.0085745	0.0102609	0.0100353	0.016515
1	0.0280978	0.0242459	0.0229878	0.0172523	0.010384	0.0165371	0.019372	0.0228193	0.00868976	0.0124129	0.00891299	0.0112912
1.001	0.0279324	0.0243016	0.0230841	0.0174851	0.0100722	0.0160074	0.0198541	0.0224904	0.00879224	0.0144142	0.00796877	0.00743686
1.002	0.0274635	0.0244631	0.0233958	0.0178716	0.00978976	0.0158375	0.0201933	0.0221046	0.0088919	0.0161893	0.00723915	0.00480975
1.003	0.0267508	0.0246199	0.0238913	0.018409	0.00947438	0.0160761	0.0203858	0.0217375	0.00880011	0.0177095	0.00693092	0.00311527
1.004	0.0258458	0.0246661	0.0243882	0.0190407	0.00893492	0.0165259	0.0203598	0.0214836	0.00831153	0.0189956	0.00719309	0.00225792
1.005	0.0247232	0.0245517	0.0247077	0.0196318	0.00811605	0.0169509	0.0200594	0.0212802	0.00742601	0.0200825	0.00795181	0.00226008
1.006	0.0233805	0.024208	0.0248192	0.0199508	0.00717422	0.0171747	0.0193988	0.0210144	0.00630982	0.0209424	0.00903159	0.00299558
1.007	0.0220139	0.0236632	0.024776	0.0197525	0.00631968	0.017092	0.0182415	0.0206593	0.00499394	0.0214938	0.0102449	0.00422601
1.008	0.0209398	0.0230678	0.0246174	0.0188699	0.00572405	0.0167788	0.0165825	0.0202944	0.00344522	0.0217367	0.0112759	0.00575513
1.009	0.0203528	0.0225044	0.0243281	0.0173013	0.00549447	0.0164356	0.0146952	0.0200718	0.00187206	0.0217884	0.011651	0.00741757
1.01	0.0202193	0.0220328	0.02388	0.0153219	0.00568454	0.016111	0.0130434	0.0200804	0.000609728	0.0217802	0.0109576	0.00904667
1.011	0.020386	0.0218423	0.0233564	0.0134234	0.00644273	0.0156808	0.0120389	0.0202105	-0.000153858	0.021768	0.00913651	0.0104983
1.012	0.0207269	0.0221625	0.0229494	0.0119889	0.00800125	0.0151104	0.0117892	0.0202147	-0.000386702	0.0217011	0.0065941	0.0116197
1.013	0.0211472	0.0230209	0.0227919	0.0111563	0.0104246	0.014432	0.0121814	0.0198156	-0.000148998	0.0215395	0.0038652	0.0121854
1.014	0.02158	0.0241736	0.0228805	0.0110182	0.013493	0.0135825	0.0131375	0.0188297	0.000450902	0.0213558	0.00116402	0.0119529
1.015	0.0220108	0.0252876	0.0231113	0.0116073	0.0168133	0.0125375	0.0145696	0.0173867	0.00133323	0.021229	-0.001547	0.010954
1.016	0.0224521	0.0261469	0.0233754	0.0126853	0.0200471	0.0114382	0.016241	0.0158244	0.00236379	0.021134	-0.00424953	0.00965693
1.017	0.0229393	0.0266952	0.0236446	0.0138907	0.0230172	0.0105069	0.0178885	0.0142971	0.0033313	0.0209331	-0.00675044	0.0085954
1.018	0.0234921	0.0269021	0.0239561	0.0149674	0.0256036	0.00996429	0.0194071	0.0128697	0.00419064	0.0204614	-0.00875742	0.00791693
1.019	0.024048	0.0267153	0.0243316	0.0157567	0.027616	0.0100245	0.0207934	0.0118179	0.00505277	0.0196934	-0.010039	0.00747212
1.02	0.0244899	0.0262343	0.0247467	0.0163019	0.0288471	0.0108666	0.0220754	0.0113692	0.00594897	0.0187582	-0.0105511	0.00722677
1.021	0.024676	0.0257145	0.0252068	0.016875	0.0293522	0.0125495	0.0233116	0.011474	0.0068779	0.0177649	-0.0104692	0.00728916
1.022	0.0244758	0.025331	0.0257018	0.0176924	0.0294794	0.0149669	0.0245143	0.0120253	0.00786458	0.0167471	-0.0100574	0.00768875
1.023	0.0239138	0.0251048	0.0260992	0.0187915	0.0295283	0.0179073	0.0256886	0.0129633	0.00880676	0.0158087	-0.00942508	0.00842711
1.024	0.0232271	0.0249831	0.0262366	0.020114	0.0296383	0.0211638	0.0268178	0.0142414	0.00954186	0.0151747	-0.00851991	0.00949398
1.025	0.0226928	0.0249304	0.0260889	0.021531	0.0299244	0.0245782	0.0277767	0.0157888	0.0101124	0.0149644	-0.00743454	0.0107521
1.026	0.0224354	0.0249748	0.0258655	0.0229323	0.0304655	0.0279808	0.0285328	0.0173665	0.0107125	0.0150746	-0.00640432	0.0120477
1.027	0.0224233	0.0251727	0.0258705	0.0242841	0.031238	0.0311892	0.0292225	0.0186515	0.0114347	0.0153788	-0.0055008	0.013382
1.028	0.0225442	0.02554	0.026268	0.0255364	0.0321473	0.0341393	0.0299077	0.0194929	0.0122584	0.0158058	-0.00458128	0.0149151
1.029	0.0226769	0.0260351	0.0271276	0.0266617	0.0330701	0.0368447	0.0305248	0.0199205	0.0131877	0.0162732	-0.00343456	0.0168361
1.03	0.0227229	0.0266185	0.0284887	0.0277103	0.0338918	0.0392091	0.0310385	0.0200481	0.0142111	0.0167944	-0.00194272	0.0192004
1.031	0.0226032	0.0272768	0.0302735	0.0286913	0.0345313	0.0411132	0.0315245	0.0199844	0.0151533	0.0174976	-0.000138889	0.0219709
1.032	0.0223197	0.0280662	0.0323973	0.0295811	0.0349882	0.0426186	0.0320891	0.019778	0.0158067	0.0183732	0.00194189	0.0251973
1.033	0.0219792	0.0291283	0.0349011	0.0303773	0.0353615	0.0439098	0.0328393	0.0194784	0.0162581	0.0191549	0.00438001	0.0289358
1.034	0.0217837	0.0305324	0.0378301	0.0310173	0.0357507	0.0452131	0.033974	0.0191871	0.016851	0.0194442	0.00729445	0.0330643
1.035	0.0219657	0.0321593	0.0411389	0.0314483	0.0362343	0.0468129	0.0356467	0.0189377	0.017802	0.0189339	0.0108161	0.0372995
1.036	0.022664	0.0339072	0.0447084	0.0318413	0.0369338	0.0489382	0.0378423	0.0186451	0.0190119	0.0176576	0.0151133	0.0412487
1.037	0.0239149	0.0359237	0.0483242	0.0325158	0.0380124	0.0516502	0.0404942	0.0183612	0.0202136	0.0160318	0.0201416	0.0444987
1.038	0.0257299	0.038411	0.0516787	0.0337138	0.0396173	0.054854	0.0435142	0.0184035	0.0212455	0.0146398	0.0254923	0.0467044
1.039	0.0281005	0.0414037	0.054514	0.0356429	0.0418113	0.0582811	0.0467319	0.0191545	0.022176	0.0140293	0.0307473	0.0475615
1.04	0.0309478	0.0448158	0.0566935	0.0384513	0.0445341	0.0614687	0.049819	0.0209521	0.0231882	0.0146402	0.0356452	0.0469407
1.041	0.0341512	0.0484475	0.0581085	0.0420969	0.0475567	0.0639515	0.0524358	0.0240923	0.0244119	0.0167974	0.0398487	0.0451346
1.042	0.03755	0.0519642	0.0586975	0.0464485	0.0506466	0.065442	0.0545115	0.0286415	0.0259181	0.0206961	0.042905	0.0426627
1.043	0.0409351	0.0550591	0.0586105	0.051281	0.0537768	0.0658162	0.0560887	0.0342913	0.0278526	0.0262697	0.0444979	0.0399156
1.044	0.0441778	0.0576463	0.0581533	0.0561537	0.0569396	0.0652385	0.0571726	0.0406096	0.030375	0.0330432	0.044786	0.0372497
1.045	0.0472275	0.0597699	0.0575565	0.0605474	0.0600607	0.0641746	0.0579734	0.0471815	0.0334767	0.0403195	0.0442996	0.0350422
1.046	0.0499754	0.061448	0.0570272	0.0640713	0.0630633	0.0630101	0.0588627	0.0533892	0.036959	0.0475242	0.0433442	0.0333946
1.047	0.0523003	0.0626967	0.0568189	0.0665121	0.0657201	0.0618582	0.0600129	0.0583846	0.0404695	0.0541281	0.0418872	0.0320724
1.048	0.054159	0.0635757	0.0570098	0.0678312	0.0677252	0.0607412	0.0613469	0.0614576	0.0436433	0.0594967	0.0399388	0.0307938
1.049	0.0555152	0.0641645	0.0574797	0.0681064	0.0689425	0.0596883	0.0626942	0.0624698	0.0463023	0.0631389	0.037601	0.0293771
1.05	0.0563231	0.0644756	0.0580905	0.0674026	0.0693443	0.0586499	0.0637942	0.0618309	0.048282	0.0648234	0.0348909	0.027685
1.051	0.056643	0.0644869	0.0585987	0.0658289	0.06895	0.0575145	0.0643207	0.0600111	0.0492414	0.0644859	0.0318049	0.0256246
1.052	0.0565691	0.0642303	0.0586887	0.063682	0.0679195	0.0562289	0.0640727	0.0571923	0.0489925	0.0621915	0.0285705	0.0232328
1.053	0.0561249	0.0637611	0.0582616	0.0612467	0.0664072	0.0548039	0.0630165	0.0533871	0.0476004	0.0580336	0.0255478	0.0207662
1.054	0.0553834	0.0631338	0.0573922	0.0586296	0.0644178	0.0533301	0.0611349	0.0487901	0.045116	0.05228	0.0229144	0.0185576
1.055	0.0544922	0.0623908	0.0561302	0.0559063	0.0619313	0.0519816	0.0584662	0.043984	0.0417419	0.0456693	0.0207071	0.0167046
1.056	0.0535523	0.0615839	0.0545471	0.0531352	0.058977	0.0508247	0.0552286	0.0397877	0.0379538	0.0391474	0.0189537	0.0151396
1.057	0.0526051	0.0607827	0.0528053	0.0503185	0.0556649	0.0497369	0.0516898	0.0367923	0.0341373	0.0333644	0.0177781	0.0138317
1.058	0.0516588	0.0599979	0.0510161	0.0474956	0.0522304	0.0485434	0.0480005	0.0351238	0.0304609	0.0286082	0.0173134	0.0126049
1.059	0.0507172	0.059166	0.0491204	0.0447167	0.0489022	0.0471525	0.0443134	0.0346466	0.0270582	0.0250076	0.0173092	0.0112021
1.06	0.0498296	0.0581868	0.0470342	0.041986	0.0458205	0.0456259	0.0409389	0.0350685	0.0240719	0.0226661	0.0172897	0.00963521
1.061	0.0490317	0.0569534	0.0448056	0.0393918	0.043076	0.0440761	0.038204	0.0359814	0.0215948	0.0216818	0.0170744	0.00810182
1.062	0.0483121	0.0554496	0.0425714	0.0371006	0.0406612	0.0424911	0.0362191	0.0370476	0.0196502	0.0219839	0.0166577	0.00673814
1.063	0.0476559	0.0537715	0.0404755	0.0351468	0.0385211	0.0408139	0.0349251	0.037994	0.0182609	0.0232028	0.0158777	0.00554046
1.064	0.0470842	0.0520029	0.038665	0.0334598	0.036661	0.0391095	0.0343161	0.0386252	0.0174921	0.0249386	0.0145419	0.00437559
1.065	0.0466506	0.0502195	0.0372772	0.0320532	0.0350116	0.0375003	0.0343365	0.039009	0.0172761	0.0269568	0.012709	0.00317309
1.066	0.0462975	0.0485567	0.0363343	0.0309402	0.0334056	0.0361089	0.0347054	0.0393648	0.0172707	0.0290702	0.0107303	0.00205398
1.067	0.0458403	0.0471198	0.0357511	0.0300032	0.0318666	0.0350811	0.0352067	0.0397236	0.0171699	0.0311506	0.00891734	0.00112688
1.068	0.0451869	0.045942	0.0354804	0.0292183	0.0306147	0.0344433	0.0357844	0.0399048	0.016981	0.0330896	0.00725979	0.000375056
1.069	0.0443889	0.0450812	0.0354982	0.0287183	0.0297869	0.0340833	0.0362596	0.0398174	0.016809	0.0346042	0.00575862	-0.000271977
1.07	0.0435562	0.0446082	0.0356861	0.0284765	0.0293627	0.0339492	0.0364182	0.0395397	0.0166525	0.0353778	0.00467544	-0.000847153
1.071	0.0427896	0.0444567	0.035876	0.0282469	0.0292202	0.034082	0.0361702	0.0391714	0.0164754	0.0353606	0.00417361	-0.00122035
1.072	0.0420556	0.0444444	0.0359631	0.0278281	0.029234	0.0345162	0.0354584	0.0388121	0.0163465	0.034707	0.00415884	-0.00126706
1.073	0.0412457	0.0444523	0.0358957	0.0271927	0.0294046	0.0351972	0.0343239	0.0386179	0.0164614	0.0336409	0.00458214	-0.00109319
1.074	0.0403755	0.0444546	0.035691	0.0264289	0.0297589	0.0359695	0.0329788	0.0387538	0.0168998	0.0324685	0.00555162	-0.00081471
1.075	0.0395996	0.0444495	0.0354554	0.0257259	0.0302303	0.0366942	0.0317029	0.0392858	0.0174139	0.0314425	0.00704349	-0.000240641
1.076	0.0391128	0.0444187	0.0352659	0.0253511	0.0308339	0.037228	0.0307979	0.0401686	0.0177132	0.0307013	0.00881454	0.000998683
1.077	0.0391016	0.0442826	0.0351103	0.0254963	0.0317162	0.0372938	0.030451	0.041336	0.0178718	0.0304561	0.0106604	0.00304432
1.078	0.0396903	0.0439389	0.034955	0.0260976	0.0329632	0.0367245	0.030591	0.0428204	0.0181219	0.0309759	0.0124969	0.00571182
1.079	0.040854	0.0433616	0.0347711	0.0269092	0.0345612	0.0357442	0.0311224	0.0446689	0.0184246	0.0323921	0.0142712	0.00865768
1.08	0.0424713	0.0425892	0.0345587	0.0278304	0.0364223	0.0346942	0.0320695	0.0467483	0.0186531	0.0346801	0.0159078	0.0114862
1.081	0.0444417	0.0416826	0.0343634	0.0290081	0.0383619	0.0337383	0.0333266	0.0488528	0.0189547	0.0376265	0.0173617	0.0138597
1.082	0.0467368	0.0407688	0.0341898	0.0305395	0.0401747	0.0330467	0.0346596	0.0509575	0.0195649	0.0408317	0.0187513	0.0156267
1.083	0.0493882	0.0400631	0.0340596	0.0322568	0.0418076	0.0329084	0.036006	0.053196	0.0204717	0.0439589	0.0201901	0.0168547
1.084	0.0523182	0.0397567	0.0341036	0.0339171	0.0433887	0.0334243	0.0374474	0.0556247	0.0214824	0.046815	0.0215689	0.0177418
1.085	0.055247	0.0398754	0.0344222	0.0354858	0.045056	0.0343705	0.0389401	0.0581622	0.0224015	0.049264	0.0228061	0.0184262
1.086	0.0579579	0.0403063	0.0349911	0.037072	0.0468181	0.0354854	0.0403089	0.0607213	0.0231012	0.0512684	0.0240294	0.0187751
1.087	0.0605275	0.0408819	0.0357248	0.0386133	0.0485187	0.0366955	0.0414712	0.0632598	0.0235603	0.0528475	0.0252913	0.0185851
1.088	0.0631663	0.0414616	0.0365346	0.039829	0.0500326	0.0380982	0.0425094	0.065699	0.023767	0.0540067	0.0263675	0.0180355
1.089	0.0658901	0.0420159	0.037304	0.0405449	0.0514676	0.0398085	0.0435267	0.0678395	0.0236962	0.054793	0.0270059	0.0175081
1.09	0.0683815	0.042479	0.0378807	0.0408998	0.0529805	0.041777	0.0445607	0.0694663	0.0234366	0.0553155	0.0272456	0.0171414
1.091	0.0702201	0.042677	0.0381265	0.04113	0.0546127	0.0437936	0.04562	0.0705222	0.0231626	0.0557293	0.027381	0.0169629
1.092	0.071209	0.0425782	0.0379917	0.0412804	0.0563656	0.0457155	0.0468069	0.0710698	0.0230234	0.0562144	0.0276719	0.0172833
1.093	0.0714089	0.0423742	0.0376116	0.0412603	0.0581203	0.0475899	0.0483377	0.0711541	0.0230723	0.0568973	0.0281734	0.0188948
1.094	0.070976	0.0422669	0.0371737	0.0410116	0.0595952	0.0495452	0.0503047	0.0707967	0.0233002	0.057777	0.0288748	0.0227018
1.095	0.0700888	0.0422943	0.03677	0.0404624	0.0606627	0.0517558	0.0526491	0.0700473	0.023839	0.058784	0.0298787	0.0288454
1.096	0.0689682	0.0423507	0.0365649	0.0393804	0.0614622	0.0543768	0.0553597	0.0688772	0.0249849	0.059874	0.0313085	0.0363969
1.097	0.0678485	0.0423635	0.0367752	0.0373402	0.0621223	0.0573301	0.0584662	0.0671111	0.0268797	0.0609647	0.0332056	0.0440581
1.098	0.066917	0.0424585	0.0373264	0.0338524	0.0627112	0.0603723	0.0619327	0.0644669	0.0293096	0.0619427	0.0356958	0.0509049
1.099	0.066288	0.0428702	0.0377727	0.0284416	0.0631949	0.0631991	0.0654821	0.0605276	0.0318444	0.0628029	0.0390995	0.0564708
1.1	0.0659519	0.0436638	0.037556	0.0205787	0.0631778	0.0653241	0.0684821	0.0548792	0.0340308	0.0636199	0.0438393	0.0606174
1.101	0.0657796	0.0446564	0.0361526	0.00970469	0.0620668	0.0661351	0.0701317	0.0473157	0.0355611	0.0644423	0.0502599	0.0635658
1.102	0.0655883	0.0454978	0.033022	-0.00466885	0.0593727	0.0650031	0.0696651	0.0378547	0.0363503	0.0653758	0.0583983	0.0657962
1.103	0.065092	0.0457404	0.0275729	-0.023016	0.0545792	0.0613389	0.066487	0.0266815	0.0364313	0.0666174	0.0681233	0.0677754
1.104	0.0639106	0.0449478	0.0191321	-0.0458796	0.0470489	0.0547198	0.0603138	0.0139711	0.0360847	0.0682864	0.0794576	0.0697804
1.105	0.0617253	0.0426139	0.00693226	-0.0738458	0.0361664	0.0448635	0.0511353	-0.000331353	0.0358877	0.0702946	0.092358	0.0719416
1.106	0.0582903	0.0380149	-0.00977867	-0.107441	0.021452	0.0315685	0.0390322	-0.0164657	0.0359469	0.0723072	0.106398	0.0743905
1.107	0.0533537	0.0303802	-0.0315168	-0.146873	0.00255922	0.0147867	0.0240616	-0.0346881	0.0352827	0.0738255	0.12098	0.0771751
1.108	0.0466368	0.0190958	-0.0584383	-0.191956	-0.0208766	-0.00548292	0.00627478	-0.0551952	0.0324197	0.0743054	0.135635	0.0800746
1.109	0.0377963	0.00363973	-0.0905108	-0.242425	-0.0492525	-0.0293825	-0.0142216	-0.0780834	0.0262672	0.0732097	0.149925	0.0826561
1.11	0.0264909	-0.0165155	-0.127704	-0.298082	-0.0827664	-0.0570556	-0.0372761	-0.103398	0.0162774	0.0700768	0.163177	0.0843955
1.111	0.0125612	-0.0418604	-0.16996	-0.358569	-0.121295	-0.0884585	-0.0628517	-0.131135	0.00229095	0.0644878	0.174543	0.0846736
1.112	-0.0039808	-0.0727241	-0.217159	-0.423279	-0.164528	-0.1235	-0.0910817	-0.161139	-0.0155823	0.0560454	0.183266	0.0827532
1.113	-0.0230907	-0.109085	-0.269132	-0.491597	-0.212194	-0.162125	-0.121977	-0.193201	-0.0371466	0.0445388	0.188906	0.0779886
1.114	-0.0447937	-0.150554	-0.325487	-0.563023	-0.264043	-0.204136	-0.155277	-0.227186	-0.0621534	0.0299819	0.191309	0.0701349
1.115	-0.0692514	-0.196638	-0.385552	-0.63712	-0.31975	-0.249194	-0.190698	-0.262897	-0.0902275	0.0124589	0.190321	0.0592987
1.116	-0.0966669	-0.246925	-0.448781	-0.713506	-0.378972	-0.29703	-0.22808	-0.300035	-0.12094	-0.00795852	0.18579	0.0456469
1.117	-0.127126	-0.301132	-0.51499	-0.791733	-0.441339	-0.347485	-0.267306	-0.338388	-0.153891	-0.031155	0.177766	0.0293296
1.118	-0.160551	-0.359085	-0.584102	-0.87122	-0.506389	-0.400361	-0.308308	-0.37781	-0.188737	-0.0568695	0.16637	0.0106619
1.119	-0.196785	-0.420668	-0.655878	-0.951468	-0.573699	-0.455238	-0.351072	-0.418051	-0.225288	-0.0847435	0.151677	-0.00979306
1.12	-0.235675	-0.485759	-0.729956	-1.03218	-0.642967	-0.511516	-0.395578	-0.458897	-0.263487	-0.114469	0.13379	-0.0314638
1.121	-0.276986	-0.554158	-0.806014	-1.11314	-0.713874	-0.568764	-0.441834	-0.500242	-0.30318	-0.145862	0.112796	-0.0539853
1.122	-0.320337	-0.625523	-0.883817	-1.19415	-0.785987	-0.626852	-0.489771	-0.541972	-0.343995	-0.178851	0.0887882	-0.0771173
1.123	-0.365392	-0.699429	-0.963117	-1.27489	-0.858821	-0.68567	-0.539038	-0.583947	-0.385455	-0.213233	0.0619907	-0.100667
1.124	-0.412073	-0.775501	-1.04362	-1.35512	-0.932008	-0.745135	-0.589176	-0.626047	-0.427168	-0.248574	0.032705	-0.124565
1.125	-0.460368	-0.853397	-1.12508	-1.43471	-1.00538	-0.805319	-0.639863	-0.668198	-0.468908	-0.284616	0.00119387	-0.148808
1.126	-0.510097	-0.932737	-1.20727	-1.51355	-1.07872	-0.866221	-0.690812	-0.710402	-0.510524	-0.321481	-0.0322215	-0.173358
1.127	-0.561074	-1.01327	-1.28995	-1.5914	-1.15165	-0.92762	-0.741728	-0.752653	-0.551821	-0.359365	-0.06714	-0.198238
1.128	-0.613186	-1.09491	-1.37277	-1.66786	-1.22382	-0.989262	-0.792431	-0.794778	-0.592448	-0.398212	-0.103204	-0.223499
1.129	-0.666164	-1.17745	-1.45534	-1.74243	-1.29499	-1.05092	-0.842842	-0.836356	-0.632058	-0.437502	-0.140154	-0.24906
1.13	-0.719567	-1.26061	-1.53737	-1.81462	-1.36502	-1.11233	-0.892866	-0.876824	-0.670517	-0.476342	-0.177806	-0.27479
1.131	-0.772956	-1.34417	-1.61853	-1.88421	-1.43378	-1.1732	-0.942353	-0.915739	-0.707759	-0.513967	-0.215873	-0.300516
1.132	-0.825978	-1.42792	-1.6984	-1.95104	-1.50115	-1.2331	-0.991081	-0.952919	-0.743711	-0.550036	-0.25395	-0.325937
1.133	-0.878471	-1.51157	-1.77653	-2.01491	-1.567	-1.2916	-1.03875	-0.98838	-0.778342	-0.58441	-0.291693	-0.350881
1.134	-0.930487	-1.59474	-1.85249	-2.07567	-1.63114	-1.34833	-1.08509	-1.02219	-0.811635	-0.617023	-0.328839	-0.375285
1.135	-0.982212	-1.67707	-1.92593	-2.13329	-1.69342	-1.40276	-1.12983	-1.05444	-0.843535	-0.648003	-0.365164	-0.398938
1.136	-1.03385	-1.75825	-1.99653	-2.18778	-1.75378	-1.45438	-1.17262	-1.08532	-0.873917	-0.677596	-0.400552	-0.421595
1.137	-1.08544	-1.83791	-2.06408	-2.23906	-1.81224	-1.50298	-1.21325	-1.11492	-0.902692	-0.706007	-0.434969	-0.443113
1.138	-1.13676	-1.91568	-2.12851	-2.28717	-1.86875	-1.54857	-1.25174	-1.14313	-0.930029	-0.733339	-0.468337	-0.463405
1.139	-1.18744	-1.99129	-2.18974	-2.33215	-1.92307	-1.59136	-1.28833	-1.16979	-0.956187	-0.759506	-0.500556	-0.482413
1.14	-1.23711	-2.0646	-2.24762	-2.37397	-1.97479	-1.63169	-1.32325	-1.19487	-0.98119	-0.784317	-0.531511	-0.50008
1.141	-1.28534	-2.13535	-2.30197	-2.41244	-2.02332	-1.66977	-1.35658	-1.21819	-1.00498	-0.807703	-0.561	-0.516359
1.142	-1.33175	-2.20317	-2.35266	-2.44724	-2.06806	-1.70562	-1.38815	-1.23959	-1.02756	-0.829656	-0.588866	-0.531311
1.143	-1.37631	-2.26765	-2.39951	-2.47814	-2.10856	-1.7391	-1.41776	-1.25894	-1.04894	-0.850081	-0.615151	-0.545096
1.144	-1.41921	-2.32872	-2.44232	-2.50508	-2.14439	-1.77015	-1.44544	-1.27618	-1.0691	-0.868874	-0.640039	-0.557858
1.145	-1.46071	-2.38653	-2.48099	-2.52816	-2.17515	-1.79873	-1.47135	-1.29113	-1.08795	-0.886014	-0.663707	-0.56972
1.146	-1.50107	-2.44116	-2.51557	-2.5475	-2.2008	-1.82505	-1.49566	-1.30371	-1.1054	-0.901633	-0.686107	-0.580905
1.147	-1.54052	-2.49254	-2.54631	-2.56336	-2.22182	-1.84936	-1.51832	-1.31412	-1.12144	-0.915967	-0.706933	-0.591607
1.148	-1.57926	-2.54066	-2.57354	-2.57613	-2.23898	-1.8716	-1.53907	-1.32277	-1.13611	-0.929217	-0.726045	-0.601923
1.149	-1.61737	-2.58555	-2.59748	-2.58623	-2.25299	-1.89152	-1.55765	-1.33017	-1.1493	-0.941591	-0.743694	-0.612047
1.15	-1.65481	-2.62729	-2.61833	-2.59402	-2.2644	-1.90886	-1.57394	-1.33689	-1.16082	-0.953345	-0.760157	-0.622099
1.151	-1.6915	-2.66593	-2.63635	-2.59979	-2.27373	-1.92352	-1.58787	-1.34332	-1.17057	-0.964642	-0.775444	-0.631836
1.152	-1.72734	-2.70139	-2.6518	-2.60379	-2.28167	-1.93561	-1.59944	-1.34958	-1.17872	-0.975495	-0.789445	-0.640921
1.153	-1.76218	-2.73358	-2.66483	-2.60641	-2.28889	-1.94535	-1.60885	-1.35559	-1.18561	-0.985927	-0.802174	-0.649311
1.154	-1.79582	-2.76247	-2.6755	-2.60793	-2.29569	-1.95296	-1.61641	-1.36124	-1.19161	-0.996043	-0.813844	-0.657232
1.155	-1.82797	-2.78819	-2.68394	-2.60846	-2.30186	-1.95865	-1.62232	-1.36642	-1.19687	-1.00593	-0.824653	-0.66488
1.156	-1.85843	-2.81097	-2.69034	-2.60795	-2.30703	-1.96263	-1.62675	-1.37101	-1.20153	-1.01558	-0.83456	-0.67216
1.157	-1.8871	-2.83094	-2.69492	-2.60637	-2.31099	-1.96514	-1.63	-1.37504	-1.20574	-1.02493	-0.843536	-0.678724
1.158	-1.91403	-2.84817	-2.69776	-2.60376	-2.31372	-1.9665	-1.63246	-1.37859	-1.20964	-1.03382	-0.851853	-0.68432
1.159	-1.93921	-2.86277	-2.69883	-2.60024	-2.31534	-1.96706	-1.63448	-1.38162	-1.21319	-1.04203	-0.859817	-0.688987
1.16	-1.9626	-2.87492	-2.69819	-2.59593	-2.3159	-1.96711	-1.63622	-1.38402	-1.21627	-1.04935	-0.867382	-0.6929
1.161	-1.98422	-2.8848	-2.69601	-2.59096	-2.31538	-1.96667	-1.63748	-1.38573	-1.2186	-1.05561	-0.874306	-0.69612
1.162	-2.00414	-2.89263	-2.69245	-2.58558	-2.31379	-1.96554	-1.63784	-1.38681	-1.21995	-1.06075	-0.880527	-0.698469
1.163	-2.02237	-2.89863	-2.68769	-2.57999	-2.31128	-1.96352	-1.637	-1.38741	-1.22023	-1.06476	-0.886191	-0.699813
1.164	-2.0389	-2.90288	-2.68184	-2.57416	-2.308	-1.96058	-1.63491	-1.38782	-1.21951	-1.06777	-0.891352	-0.70039
1.165	-2.05366	-2.90549	-2.67497	-2.568	-2.30423	-1.95688	-1.63171	-1.38826	-1.21792	-1.06994	-0.895937	-0.700603
1.166	-2.0664	-2.90666	-2.66726	-2.5614	-2.30033	-1.95269	-1.62772	-1.38861	-1.21577	-1.07136	-0.899998	-0.70058
1.167	-2.07687	-2.90658	-2.65902	-2.55419	-2.29661	-1.94839	-1.62328	-1.38858	-1.21352	-1.07202	-0.903689	-0.700193
1.168	-2.0851	-2.90531	-2.65058	-2.54622	-2.29311	-1.9443	-1.6188	-1.38803	-1.21145	-1.072	-0.906981	-0.699395
1.169	-2.09151	-2.90274	-2.64207	-2.53748	-2.28967	-1.94059	-1.61465	-1.38705	-1.20962	-1.07147	-0.909656	-0.698419
1.17	-2.09672	-2.89879	-2.6335	-2.52805	-2.28612	-1.93723	-1.61096	-1.38573	-1.20809	-1.07065	-0.911637	-0.697692
1.171	-2.10127	-2.89359	-2.62486	-2.51802	-2.28219	-1.93409	-1.60763	-1.38406	-1.20691	-1.0697	-0.91316	-0.697493
1.172	-2.10558	-2.88745	-2.61607	-2.50764	-2.27768	-1.93103	-1.60466	-1.38195	-1.20613	-1.06865	-0.914409	-0.697834
1.173	-2.10998	-2.88061	-2.607	-2.49711	-2.27259	-1.92801	-1.602	-1.37938	-1.20578	-1.06751	-0.91516	-0.6987
1.174	-2.11465	-2.87316	-2.59741	-2.48651	-2.26701	-1.92499	-1.59953	-1.37635	-1.20579	-1.06618	-0.915119	-0.700103
1.175	-2.11957	-2.86502	-2.58716	-2.47588	-2.261	-1.92178	-1.59712	-1.3729	-1.20595	-1.06456	-0.914307	-0.701875
1.176	-2.12463	-2.85612	-2.5763	-2.46539	-2.25462	-1.91816	-1.59455	-1.36912	-1.20612	-1.06263	-0.912928	-0.703668
1.177	-2.12969	-2.8464	-2.565	-2.45525	-2.24801	-1.91408	-1.59169	-1.36514	-1.20618	-1.06042	-0.911244	-0.705205
1.178	-2.13453	-2.8359	-2.55339	-2.44562	-2.24118	-1.90967	-1.58853	-1.36116	-1.20587	-1.05808	-0.909415	-0.706439
1.179	-2.13885	-2.82472	-2.54146	-2.43651	-2.23413	-1.90492	-1.58509	-1.35747	-1.20491	-1.05571	-0.907465	-0.707425
1.18	-2.14245	-2.81299	-2.5293	-2.42778	-2.22693	-1.89975	-1.58129	-1.35408	-1.20326	-1.05323	-0.905497	-0.708071
1.181	-2.14535	-2.8007	-2.51698	-2.41919	-2.21962	-1.89412	-1.57712	-1.35073	-1.20106	-1.0504	-0.903662	-0.708258
1.182	-2.14763	-2.78774	-2.50458	-2.41043	-2.21214	-1.88803	-1.57272	-1.34715	-1.19849	-1.04708	-0.901892	-0.70812
1.183	-2.14922	-2.77404	-2.49213	-2.40111	-2.20447	-1.88145	-1.56817	-1.34335	-1.19548	-1.04339	-0.899949	-0.707786
1.184	-2.14996	-2.75973	-2.47971	-2.39097	-2.19673	-1.87447	-1.56339	-1.33945	-1.19188	-1.03962	-0.897736	-0.707121
1.185	-2.14988	-2.74507	-2.46741	-2.38002	-2.18915	-1.86739	-1.5583	-1.33546	-1.18779	-1.03594	-0.895373	-0.70594
1.186	-2.14912	-2.73029	-2.45533	-2.36854	-2.18189	-1.86047	-1.55302	-1.33124	-1.18344	-1.03228	-0.89298	-0.704171
1.187	-2.14774	-2.71549	-2.44345	-2.35694	-2.17495	-1.85369	-1.54777	-1.32662	-1.17892	-1.02854	-0.890529	-0.70177
1.188	-2.14575	-2.70081	-2.43171	-2.34551	-2.16815	-1.84678	-1.54263	-1.32164	-1.17431	-1.02479	-0.887991	-0.698665
1.189	-2.14317	-2.68633	-2.42004	-2.33422	-2.16126	-1.83955	-1.53744	-1.31648	-1.16969	-1.02104	-0.885553	-0.694807
1.19	-2.14004	-2.67197	-2.40828	-2.32287	-2.15414	-1.83208	-1.53215	-1.31117	-1.16505	-1.01728	-0.883422	-0.690236
1.191	-2.13646	-2.65765	-2.39619	-2.31133	-2.14666	-1.82458	-1.52688	-1.30569	-1.16045	-1.0135	-0.881416	-0.685106
1.192	-2.13256	-2.64327	-2.38364	-2.29958	-2.13853	-1.8172	-1.52163	-1.29997	-1.15593	-1.00961	-0.879246	-0.679687
1.193	-2.12839	-2.62868	-2.37073	-2.28755	-2.1294	-1.80994	-1.51619	-1.29401	-1.15145	-1.00536	-0.876988	-0.6743
1.194	-2.12392	-2.61366	-2.35749	-2.27524	-2.11915	-1.80276	-1.51042	-1.28796	-1.14696	-1.00061	-0.874898	-0.669194
1.195	-2.11923	-2.59814	-2.34375	-2.2627	-2.10786	-1.7956	-1.50439	-1.28197	-1.14245	-0.995393	-0.872943	-0.664522
1.196	-2.11444	-2.58218	-2.32938	-2.25003	-2.09585	-1.78843	-1.49836	-1.27614	-1.13774	-0.98988	-0.870733	-0.660349
1.197	-2.1095	-2.56594	-2.31447	-2.23736	-2.08351	-1.78115	-1.49248	-1.27051	-1.13254	-0.984309	-0.867924	-0.656646
1.198	-2.10445	-2.54956	-2.29937	-2.22468	-2.07123	-1.77352	-1.48646	-1.26515	-1.12669	-0.978939	-0.864533	-0.653429
1.199	-2.0994	-2.53318	-2.28444	-2.21198	-2.05933	-1.76537	-1.4799	-1.26005	-1.12036	-0.973924	-0.860713	-0.650799
1.2	-2.09441	-2.5169	-2.2699	-2.19937	-2.04801	-1.75678	-1.4726	-1.25512	-1.11394	-0.969252	-0.8565	-0.648737
1.201	-2.08956	-2.5008	-2.25584	-2.18705	-2.03726	-1.74804	-1.46474	-1.25043	-1.10777	-0.964926	-0.851969	-0.646983
1.202	-2.08494	-2.48498	-2.24227	-2.17509	-2.02692	-1.73927	-1.45663	-1.2462	-1.10198	-0.961048	-0.847383	-0.645197
1.203	-2.08045	-2.46952	-2.22911	-2.1633	-2.01684	-1.73043	-1.44856	-1.24252	-1.0965	-0.95765	-0.842943	-0.643182
1.204	-2.0758	-2.45433	-2.21621	-2.15133	-2.00691	-1.7215	-1.44065	-1.23924	-1.09139	-0.954682	-0.838524	-0.640945
1.205	-2.07067	-2.43917	-2.20346	-2.13905	-1.99717	-1.7126	-1.43298	-1.23604	-1.08687	-0.952169	-0.833967	-0.638555
1.206	-2.06486	-2.42388	-2.19078	-2.12665	-1.98774	-1.704	-1.42564	-1.2327	-1.08306	-0.950162	-0.829393	-0.63601
1.207	-2.05842	-2.40847	-2.17811	-2.11436	-1.9787	-1.69597	-1.41868	-1.22914	-1.07981	-0.948574	-0.824971	-0.633332
1.208	-2.0515	-2.39298	-2.16545	-2.10209	-1.96994	-1.68863	-1.41209	-1.22522	-1.07677	-0.947185	-0.82073	-0.630626
1.209	-2.04431	-2.37747	-2.15281	-2.08962	-1.96139	-1.68184	-1.40575	-1.22067	-1.07357	-0.945677	-0.816659	-0.627944
1.21	-2.03706	-2.362	-2.14018	-2.07703	-1.95299	-1.67541	-1.39946	-1.21535	-1.06998	-0.943704	-0.812811	-0.62516
1.211	-2.03003	-2.34656	-2.12748	-2.06453	-1.9446	-1.66909	-1.39305	-1.20949	-1.066	-0.941071	-0.809368	-0.622091
1.212	-2.02349	-2.33113	-2.11468	-2.05211	-1.93605	-1.6627	-1.38658	-1.20339	-1.06176	-0.93778	-0.806451	-0.618751
1.213	-2.01757	-2.31573	-2.10166	-2.03967	-1.92734	-1.65616	-1.38009	-1.19728	-1.05747	-0.933907	-0.803929	-0.615338
1.214	-2.01223	-2.30039	-2.08818	-2.02711	-1.91855	-1.64954	-1.37353	-1.19124	-1.05333	-0.929583	-0.801583	-0.612065
1.215	-2.00729	-2.2851	-2.07404	-2.01436	-1.90978	-1.64294	-1.36691	-1.18522	-1.04934	-0.925027	-0.799242	-0.609026
1.216	-2.00249	-2.26985	-2.05931	-2.00151	-1.90116	-1.63644	-1.36033	-1.17926	-1.04539	-0.920435	-0.796739	-0.606189
1.217	-1.99756	-2.25465	-2.04426	-1.98868	-1.89276	-1.62997	-1.35395	-1.17339	-1.04129	-0.915775	-0.793973	-0.603557
1.218	-1.99233	-2.23965	-2.02917	-1.97599	-1.8846	-1.62335	-1.34788	-1.16758	-1.03698	-0.910872	-0.79092	-0.601151
1.219	-1.98677	-2.22495	-2.01428	-1.96349	-1.87664	-1.61639	-1.3423	-1.16182	-1.03242	-0.905667	-0.787499	-0.598923
1.22	-1.98079	-2.21066	-1.99982	-1.95128	-1.86874	-1.60906	-1.33724	-1.15614	-1.02775	-0.900268	-0.783619	-0.59684
1.221	-1.9743	-2.19696	-1.98601	-1.93947	-1.86062	-1.60165	-1.33269	-1.15065	-1.02315	-0.894863	-0.779416	-0.594878
1.222	-1.96731	-2.18387	-1.97297	-1.92815	-1.85208	-1.59452	-1.32869	-1.14552	-1.01879	-0.889665	-0.775289	-0.592929
1.223	-1.96006	-2.17125	-1.96057	-1.9173	-1.84318	-1.58781	-1.32526	-1.14077	-1.01476	-0.884818	-0.771567	-0.590878
1.224	-1.95278	-2.15894	-1.94858	-1.90685	-1.83414	-1.58146	-1.32226	-1.13626	-1.01105	-0.880318	-0.768297	-0.588731
1.225	-1.94557	-2.14674	-1.93689	-1.89672	-1.82509	-1.5753	-1.31947	-1.13189	-1.00766	-0.876114	-0.765396	-0.586607
1.226	-1.93837	-2.1345	-1.92556	-1.88676	-1.81604	-1.56913	-1.31657	-1.12764	-1.00439	-0.872185	-0.762825	-0.584632
1.227	-1.93112	-2.12215	-1.9145	-1.87677	-1.80695	-1.56275	-1.31319	-1.12342	-1.00095	-0.868459	-0.760554	-0.58275
1.228	-1.92389	-2.10963	-1.90347	-1.86665	-1.79783	-1.55618	-1.30912	-1.11899	-0.997169	-0.864821	-0.758445	-0.580778
1.229	-1.9168	-2.09697	-1.89223	-1.85644	-1.78854	-1.54939	-1.30438	-1.11421	-0.992906	-0.861229	-0.75628	-0.578706
1.23	-1.91001	-2.0842	-1.88065	-1.84605	-1.77889	-1.54214	-1.29908	-1.10914	-0.987958	-0.857735	-0.753889	-0.576642
1.231	-1.9036	-2.0713	-1.86879	-1.8352	-1.76878	-1.53433	-1.2933	-1.10384	-0.982276	-0.854372	-0.751245	-0.574449
1.232	-1.8975	-2.0581	-1.85682	-1.82373	-1.75828	-1.52605	-1.28713	-1.0982	-0.97611	-0.851045	-0.748477	-0.571764
1.233	-1.89145	-2.0445	-1.84482	-1.81184	-1.74762	-1.51755	-1.28055	-1.09194	-0.969729	-0.84761	-0.745687	-0.568396
1.234	-1.88523	-2.0307	-1.83282	-1.79992	-1.73693	-1.50884	-1.27348	-1.08487	-0.963184	-0.844026	-0.74266	-0.564576
1.235	-1.87864	-2.01701	-1.82081	-1.78822	-1.72615	-1.49968	-1.26592	-1.0771	-0.956505	-0.840279	-0.738998	-0.56077
1.236	-1.87162	-2.00367	-1.80882	-1.77679	-1.71533	-1.48986	-1.25805	-1.06891	-0.949944	-0.836314	-0.734622	-0.557361
1.237	-1.86421	-1.9907	-1.79692	-1.76562	-1.70482	-1.47958	-1.25006	-1.06061	-0.943931	-0.832066	-0.72983	-0.554393
1.238	-1.85656	-1.97791	-1.78513	-1.75471	-1.69482	-1.46914	-1.24215	-1.05249	-0.938744	-0.827501	-0.724846	-0.55155
1.239	-1.84893	-1.9652	-1.77344	-1.74403	-1.68535	-1.4588	-1.23461	-1.04491	-0.934241	-0.822673	-0.719727	-0.548508
1.24	-1.84164	-1.95255	-1.76198	-1.73362	-1.67635	-1.44874	-1.22774	-1.03821	-0.930091	-0.817756	-0.714656	-0.545221
1.241	-1.83495	-1.94005	-1.75082	-1.72353	-1.66777	-1.43921	-1.22159	-1.03258	-0.926187	-0.812956	-0.709951	-0.541861
1.242	-1.82895	-1.9277	-1.73995	-1.7138	-1.65948	-1.43043	-1.21603	-1.02798	-0.922654	-0.808374	-0.705911	-0.538672
1.243	-1.82355	-1.91546	-1.72933	-1.70438	-1.65138	-1.4226	-1.21093	-1.0242	-0.919586	-0.804029	-0.702678	-0.535809
1.244	-1.81866	-1.90331	-1.71905	-1.69509	-1.64341	-1.41575	-1.20613	-1.02096	-0.916913	-0.799924	-0.700164	-0.53333
1.245	-1.81402	-1.8913	-1.70914	-1.68571	-1.63546	-1.40976	-1.20146	-1.01814	-0.914491	-0.796011	-0.698198	-0.53134
1.246	-1.80935	-1.87943	-1.69949	-1.67617	-1.62739	-1.40446	-1.19684	-1.01569	-0.912156	-0.792271	-0.696603	-0.529946
1.247	-1.80449	-1.86766	-1.6899	-1.6665	-1.61906	-1.39961	-1.19234	-1.01361	-0.909669	-0.788805	-0.69509	-0.529007
1.248	-1.79935	-1.85607	-1.68025	-1.6567	-1.61041	-1.39492	-1.18793	-1.01174	-0.906822	-0.785755	-0.693382	-0.527985
1.249	-1.79385	-1.8448	-1.67056	-1.64669	-1.60153	-1.39016	-1.18358	-1.00982	-0.903644	-0.783218	-0.691485	-0.526206
1.25	-1.78794	-1.8339	-1.66079	-1.63636	-1.59256	-1.38535	-1.17926	-1.00752	-0.900322	-0.781159	-0.689551	-0.523272
1.251	-1.78172	-1.82331	-1.65089	-1.62581	-1.58355	-1.38051	-1.17484	-1.00456	-0.896921	-0.779389	-0.687546	-0.519231
1.252	-1.77534	-1.81293	-1.64097	-1.61518	-1.57452	-1.37545	-1.17005	-1.00086	-0.893316	-0.777737	-0.685289	-0.514462
1.253	-1.76874	-1.80261	-1.63114	-1.60444	-1.56559	-1.36991	-1.16479	-0.996468	-0.889449	-0.776121	-0.68258	-0.509423
1.254	-1.76177	-1.79219	-1.6214	-1.5935	-1.55678	-1.36377	-1.15896	-0.991475	-0.885505	-0.774472	-0.679355	-0.504509
1.255	-1.75438	-1.78159	-1.61168	-1.58239	-1.54807	-1.35713	-1.15252	-0.986037	-0.881684	-0.772698	-0.675807	-0.500036
1.256	-1.74684	-1.77087	-1.6019	-1.57136	-1.53949	-1.3502	-1.14567	-0.980365	-0.877964	-0.770663	-0.672103	-0.496078
1.257	-1.73957	-1.76016	-1.59202	-1.56064	-1.53108	-1.34317	-1.13873	-0.974641	-0.874208	-0.768249	-0.668198	-0.492459
1.258	-1.73271	-1.74955	-1.58204	-1.55037	-1.52289	-1.33615	-1.13194	-0.969005	-0.870386	-0.765448	-0.664139	-0.488982
1.259	-1.72616	-1.73908	-1.57197	-1.54063	-1.51495	-1.32919	-1.12539	-0.963534	-0.866553	-0.762306	-0.660277	-0.485577
1.26	-1.71984	-1.72877	-1.56187	-1.53141	-1.50726	-1.32235	-1.11907	-0.958236	-0.862654	-0.75883	-0.656944	-0.482333
1.261	-1.71375	-1.7187	-1.5518	-1.52261	-1.49976	-1.31572	-1.11296	-0.95314	-0.85855	-0.755071	-0.654118	-0.479412
1.262	-1.70787	-1.70901	-1.5418	-1.51413	-1.49225	-1.3094	-1.10703	-0.948287	-0.854257	-0.751209	-0.651608	-0.476901
1.263	-1.70214	-1.69964	-1.53194	-1.50581	-1.48456	-1.30335	-1.10115	-0.943694	-0.849931	-0.74742	-0.649336	-0.474869
1.264	-1.69662	-1.69041	-1.52223	-1.49746	-1.47666	-1.29745	-1.09526	-0.939396	-0.845686	-0.743747	-0.647306	-0.473398
1.265	-1.69151	-1.68115	-1.51264	-1.48899	-1.46861	-1.29167	-1.08957	-0.935381	-0.841544	-0.740163	-0.645479	-0.472455
1.266	-1.68698	-1.67177	-1.50305	-1.48056	-1.46056	-1.28596	-1.08425	-0.931551	-0.837456	-0.736681	-0.643662	-0.47201
1.267	-1.68297	-1.66213	-1.49343	-1.47237	-1.45254	-1.28016	-1.07936	-0.927908	-0.833427	-0.733417	-0.641563	-0.472094
1.268	-1.67924	-1.65212	-1.4839	-1.46451	-1.44445	-1.2741	-1.07482	-0.924639	-0.829652	-0.73058	-0.6391	-0.472596
1.269	-1.67552	-1.64178	-1.47466	-1.45682	-1.43627	-1.26779	-1.07054	-0.921893	-0.826412	-0.728272	-0.636426	-0.473208
1.27	-1.67157	-1.63138	-1.46582	-1.44907	-1.42818	-1.26139	-1.06655	-0.919499	-0.823801	-0.726353	-0.633604	-0.473587
1.271	-1.66725	-1.62118	-1.45731	-1.44111	-1.42038	-1.25509	-1.06289	-0.917028	-0.821552	-0.7246	-0.630515	-0.473419
1.272	-1.66256	-1.61137	-1.44897	-1.43303	-1.41286	-1.24889	-1.05944	-0.914171	-0.819236	-0.722867	-0.627075	-0.472535
1.273	-1.65757	-1.60202	-1.44077	-1.42491	-1.40546	-1.24277	-1.05589	-0.910863	-0.816653	-0.721126	-0.623377	-0.471104
1.274	-1.65234	-1.59312	-1.43271	-1.41673	-1.39812	-1.23691	-1.05205	-0.907079	-0.813898	-0.719389	-0.619669	-0.469423
1.275	-1.64699	-1.58459	-1.42477	-1.40843	-1.39093	-1.23135	-1.04808	-0.90276	-0.811172	-0.717491	-0.616188	-0.467583
1.276	-1.6415	-1.57638	-1.41693	-1.40009	-1.38407	-1.22597	-1.04427	-0.897913	-0.808467	-0.715059	-0.613093	-0.46556
1.277	-1.63571	-1.56844	-1.40919	-1.39193	-1.37764	-1.22064	-1.04078	-0.892707	-0.805525	-0.711861	-0.610564	-0.463388
1.278	-1.6295	-1.56073	-1.40155	-1.38401	-1.37147	-1.21529	-1.03742	-0.88754	-0.802221	-0.708059	-0.608733	-0.46118
1.279	-1.62292	-1.55309	-1.39392	-1.37626	-1.36525	-1.20996	-1.03391	-0.882831	-0.798625	-0.703939	-0.607517	-0.459097
1.28	-1.61599	-1.54532	-1.38615	-1.3686	-1.35888	-1.20477	-1.03016	-0.878664	-0.794733	-0.699496	-0.606622	-0.457303
1.281	-1.60884	-1.5373	-1.37806	-1.36109	-1.35229	-1.19978	-1.02626	-0.874835	-0.790493	-0.694627	-0.605664	-0.455903
1.282	-1.6018	-1.52893	-1.36956	-1.35373	-1.34537	-1.19487	-1.02223	-0.871172	-0.785986	-0.689613	-0.604392	-0.45497
1.283	-1.59516	-1.52014	-1.36074	-1.34632	-1.33807	-1.18979	-1.01788	-0.867582	-0.781466	-0.684855	-0.602733	-0.454453
1.284	-1.589	-1.51086	-1.35174	-1.33857	-1.33054	-1.18436	-1.01309	-0.864035	-0.777211	-0.680508	-0.600564	-0.454023
1.285	-1.58318	-1.50116	-1.34272	-1.33033	-1.32287	-1.17864	-1.00807	-0.860579	-0.773327	-0.67653	-0.597742	-0.453329
1.286	-1.57759	-1.4913	-1.33372	-1.32179	-1.31505	-1.17274	-1.0031	-0.857205	-0.769726	-0.672794	-0.594367	-0.45229
1.287	-1.57209	-1.48151	-1.32473	-1.31322	-1.30701	-1.16661	-0.998296	-0.853876	-0.766192	-0.669332	-0.590735	-0.450969
1.288	-1.56656	-1.47187	-1.31584	-1.30474	-1.29872	-1.16023	-0.993534	-0.850631	-0.762519	-0.666366	-0.58705	-0.449356
1.289	-1.56092	-1.46229	-1.30722	-1.29632	-1.29026	-1.1537	-0.988655	-0.847489	-0.758709	-0.663964	-0.583385	-0.447406
1.29	-1.55509	-1.45282	-1.29899	-1.28791	-1.28197	-1.14725	-0.983723	-0.84442	-0.75499	-0.661946	-0.579792	-0.445147
1.291	-1.54901	-1.44367	-1.29114	-1.27952	-1.27421	-1.14097	-0.978943	-0.841424	-0.751551	-0.66007	-0.576418	-0.442672
1.292	-1.54272	-1.43492	-1.28358	-1.2712	-1.2671	-1.13472	-0.974383	-0.838509	-0.748417	-0.658186	-0.573469	-0.44012
1.293	-1.53638	-1.4265	-1.27628	-1.26296	-1.26046	-1.12834	-0.969933	-0.835622	-0.745557	-0.656208	-0.570896	-0.437618
1.294	-1.53011	-1.41839	-1.26928	-1.2548	-1.25398	-1.12186	-0.965388	-0.832691	-0.742898	-0.653915	-0.568455	-0.435232
1.295	-1.52398	-1.4106	-1.26256	-1.24682	-1.2474	-1.11546	-0.960559	-0.829678	-0.740274	-0.651058	-0.566102	-0.432999
1.296	-1.51798	-1.40303	-1.256	-1.23926	-1.24062	-1.10929	-0.95538	-0.826649	-0.73746	-0.647715	-0.563935	-0.430968
1.297	-1.512	-1.39555	-1.2495	-1.23227	-1.23362	-1.10334	-0.949925	-0.823851	-0.734273	-0.644252	-0.561899	-0.429224
1.298	-1.50601	-1.38802	-1.24297	-1.22568	-1.22644	-1.09753	-0.944271	-0.821454	-0.73072	-0.64095	-0.559811	-0.427823
1.299	-1.50007	-1.38042	-1.2363	-1.21917	-1.21912	-1.09189	-0.938447	-0.819268	-0.727002	-0.637891	-0.557587	-0.426672
1.3	-1.49424	-1.37283	-1.2294	-1.2127	-1.21181	-1.08652	-0.932569	-0.816943	-0.723367	-0.635123	-0.555227	-0.425646
1.301	-1.48858	-1.36537	-1.22213	-1.2065	-1.20465	-1.08141	-0.926883	-0.814347	-0.719961	-0.632819	-0.5527	-0.424776
1.302	-1.48319	-1.3581	-1.21443	-1.20071	-1.19774	-1.07634	-0.921615	-0.811563	-0.716849	-0.631124	-0.550017	-0.424146
1.303	-1.47821	-1.35088	-1.20653	-1.19518	-1.19107	-1.07109	-0.91686	-0.808561	-0.714136	-0.629826	-0.54729	-0.423605
1.304	-1.47378	-1.34359	-1.19884	-1.18965	-1.18474	-1.06573	-0.91267	-0.805075	-0.711874	-0.628515	-0.544724	-0.422785
1.305	-1.46999	-1.33617	-1.19157	-1.184	-1.17887	-1.06051	-0.909115	-0.800938	-0.709882	-0.627035	-0.542499	-0.42148
1.306	-1.46678	-1.32875	-1.18474	-1.1782	-1.17337	-1.05554	-0.906223	-0.796346	-0.707963	-0.625459	-0.540626	-0.419813
1.307	-1.46386	-1.32146	-1.17825	-1.17221	-1.16789	-1.05066	-0.903807	-0.791604	-0.706155	-0.623772	-0.539002	-0.417993
1.308	-1.46093	-1.31428	-1.17199	-1.16599	-1.16224	-1.04578	-0.901541	-0.786833	-0.704522	-0.621828	-0.53757	-0.416079
1.309	-1.45786	-1.30716	-1.1659	-1.15956	-1.15653	-1.04102	-0.899219	-0.782104	-0.70288	-0.619642	-0.536314	-0.414077
1.31	-1.45461	-1.30016	-1.15992	-1.15304	-1.15093	-1.03658	-0.89673	-0.777611	-0.700946	-0.617491	-0.53511	-0.412188
1.311	-1.45118	-1.29332	-1.15396	-1.14655	-1.14549	-1.03256	-0.89396	-0.773492	-0.698635	-0.615583	-0.533814	-0.410618
1.312	-1.44753	-1.28658	-1.14801	-1.14016	-1.1402	-1.02886	-0.890808	-0.769641	-0.696101	-0.613842	-0.532377	-0.409243
1.313	-1.44347	-1.27983	-1.142	-1.13391	-1.13498	-1.02537	-0.887266	-0.76591	-0.693498	-0.612082	-0.5308	-0.407822
1.314	-1.43886	-1.27305	-1.13582	-1.12778	-1.12969	-1.02217	-0.883533	-0.762329	-0.690759	-0.610218	-0.52915	-0.406409
1.315	-1.43369	-1.26633	-1.12946	-1.12157	-1.12412	-1.01926	-0.879849	-0.759007	-0.687803	-0.608306	-0.527469	-0.405257
1.316	-1.42816	-1.25984	-1.1231	-1.11505	-1.11815	-1.01641	-0.876189	-0.755956	-0.684718	-0.606413	-0.525662	-0.404454
1.317	-1.42257	-1.25378	-1.11688	-1.1082	-1.1119	-1.01344	-0.872426	-0.753113	-0.681584	-0.604426	-0.523646	-0.403843
1.318	-1.41712	-1.24819	-1.11089	-1.1012	-1.10566	-1.01032	-0.868662	-0.750385	-0.678441	-0.602182	-0.521466	-0.403161
1.319	-1.41193	-1.2429	-1.10507	-1.09432	-1.09967	-1.00703	-0.865128	-0.747729	-0.67529	-0.599821	-0.519212	-0.402243
1.32	-1.40706	-1.23771	-1.09936	-1.08767	-1.09412	-1.00344	-0.861911	-0.745248	-0.672093	-0.5977	-0.516974	-0.401072
1.321	-1.40241	-1.2325	-1.09383	-1.08117	-1.08914	-0.999416	-0.858902	-0.743022	-0.66893	-0.59596	-0.514823	-0.399601
1.322	-1.39788	-1.2272	-1.08854	-1.07482	-1.08482	-0.995038	-0.855978	-0.740862	-0.666044	-0.594472	-0.512849	-0.397805
1.323	-1.39346	-1.2219	-1.08346	-1.06875	-1.0811	-0.990545	-0.853139	-0.738537	-0.663658	-0.593086	-0.511164	-0.395878
1.324	-1.38922	-1.21674	-1.07842	-1.06303	-1.07762	-0.986043	-0.850435	-0.736065	-0.661807	-0.591706	-0.509741	-0.394046
1.325	-1.38504	-1.21162	-1.07332	-1.05742	-1.07404	-0.981532	-0.847839	-0.73357	-0.660331	-0.590218	-0.508388	-0.392318
1.326	-1.38076	-1.20643	-1.06821	-1.05168	-1.07029	-0.977139	-0.845327	-0.731024	-0.65903	-0.588495	-0.506987	-0.390524
1.327	-1.3763	-1.20111	-1.0631	-1.04579	-1.0665	-0.973094	-0.842981	-0.728286	-0.657725	-0.586422	-0.505616	-0.388537
1.328	-1.3717	-1.19565	-1.05793	-1.04	-1.06261	-0.969485	-0.840765	-0.725364	-0.656284	-0.583902	-0.504384	-0.386398
1.329	-1.36701	-1.19001	-1.05273	-1.03466	-1.0585	-0.966114	-0.838375	-0.722378	-0.654583	-0.580965	-0.503297	-0.384217
1.33	-1.36232	-1.18419	-1.04766	-1.02988	-1.05421	-0.962724	-0.835532	-0.719317	-0.652475	-0.577834	-0.502296	-0.382124
1.331	-1.35767	-1.17826	-1.04281	-1.02551	-1.04997	-0.959234	-0.832205	-0.716138	-0.649922	-0.574728	-0.501279	-0.380259
1.332	-1.35316	-1.17231	-1.0381	-1.02128	-1.04599	-0.955592	-0.828499	-0.712921	-0.646994	-0.571715	-0.500099	-0.378695
1.333	-1.3489	-1.16641	-1.0334	-1.01698	-1.04236	-0.951683	-0.824569	-0.709763	-0.643782	-0.568816	-0.498587	-0.377411
1.334	-1.34479	-1.1606	-1.02862	-1.01251	-1.03895	-0.947473	-0.820695	-0.706701	-0.640376	-0.5661	-0.496693	-0.376345
1.335	-1.34064	-1.1549	-1.02375	-1.00776	-1.03562	-0.943072	-0.817207	-0.703737	-0.636845	-0.563648	-0.494551	-0.375481
1.336	-1.33638	-1.14931	-1.01879	-1.00265	-1.03215	-0.938782	-0.814263	-0.700763	-0.633332	-0.561458	-0.492306	-0.374787
1.337	-1.33199	-1.1438	-1.01367	-0.997206	-1.02829	-0.934889	-0.811805	-0.697447	-0.63009	-0.5594	-0.489977	-0.37415
1.338	-1.32744	-1.1384	-1.00839	-0.991621	-1.02384	-0.931392	-0.809667	-0.693452	-0.627187	-0.557293	-0.487538	-0.373385
1.339	-1.32267	-1.13317	-1.00298	-0.986049	-1.01871	-0.928172	-0.807728	-0.688753	-0.624451	-0.554997	-0.485046	-0.372285
1.34	-1.31762	-1.12807	-0.997467	-0.980548	-1.01297	-0.925188	-0.805997	-0.683589	-0.62192	-0.552497	-0.482666	-0.370741
1.341	-1.3123	-1.12309	-0.991909	-0.975087	-1.00673	-0.922396	-0.804456	-0.678306	-0.619887	-0.549872	-0.480658	-0.368829
1.342	-1.3068	-1.11823	-0.986356	-0.96961	-1.00017	-0.919701	-0.802919	-0.673322	-0.618389	-0.547157	-0.479211	-0.366776
1.343	-1.30117	-1.11339	-0.980746	-0.964088	-0.993494	-0.916972	-0.801148	-0.668962	-0.617107	-0.544319	-0.478208	-0.364804
1.344	-1.29554	-1.10834	-0.975072	-0.958567	-0.986892	-0.91408	-0.798989	-0.6653	-0.615799	-0.541382	-0.477454	-0.362973
1.345	-1.28996	-1.10306	-0.969457	-0.95313	-0.98044	-0.910932	-0.796415	-0.662276	-0.614505	-0.538503	-0.476838	-0.361171
1.346	-1.2845	-1.09763	-0.963978	-0.947836	-0.974063	-0.907462	-0.793505	-0.659843	-0.61329	-0.53591	-0.476148	-0.359293
1.347	-1.27923	-1.09213	-0.958638	-0.94271	-0.967641	-0.903629	-0.790306	-0.657936	-0.611932	-0.533714	-0.475123	-0.357451
1.348	-1.27427	-1.08648	-0.953459	-0.937781	-0.961037	-0.899397	-0.786768	-0.65642	-0.610034	-0.531748	-0.473602	-0.355892
1.349	-1.26958	-1.08072	-0.94847	-0.933117	-0.954202	-0.894713	-0.78282	-0.655194	-0.607453	-0.529716	-0.471619	-0.354757
1.35	-1.26519	-1.07497	-0.943639	-0.928757	-0.947292	-0.889567	-0.778451	-0.654216	-0.604406	-0.52752	-0.469449	-0.353983
1.351	-1.26115	-1.06936	-0.938801	-0.924641	-0.940491	-0.884046	-0.773733	-0.653401	-0.601123	-0.525331	-0.467368	-0.353432
1.352	-1.25738	-1.06389	-0.933732	-0.920602	-0.933908	-0.878258	-0.768787	-0.652634	-0.597723	-0.52334	-0.465379	-0.353001
1.353	-1.25371	-1.05848	-0.928353	-0.916424	-0.92761	-0.872289	-0.763792	-0.651829	-0.594352	-0.521634	-0.463292	-0.352532
1.354	-1.25014	-1.05309	-0.922779	-0.912053	-0.921636	-0.866265	-0.758824	-0.650934	-0.591149	-0.520277	-0.461031	-0.35178
1.355	-1.24676	-1.04787	-0.917177	-0.907691	-0.916114	-0.860366	-0.753733	-0.649946	-0.588179	-0.519295	-0.458722	-0.350589
1.356	-1.24362	-1.0429	-0.911727	-0.903497	-0.911234	-0.854733	-0.748462	-0.648846	-0.585521	-0.518609	-0.456487	-0.348967
1.357	-1.24069	-1.03808	-0.906633	-0.899457	-0.907052	-0.84937	-0.743174	-0.647506	-0.583281	-0.518014	-0.454342	-0.347005
1.358	-1.2379	-1.03334	-0.90203	-0.895584	-0.903441	-0.844177	-0.73805	-0.645784	-0.581546	-0.517216	-0.452409	-0.344786
1.359	-1.23518	-1.02864	-0.897867	-0.891887	-0.900091	-0.839154	-0.733244	-0.643668	-0.580308	-0.516052	-0.450882	-0.342433
1.36	-1.23244	-1.02392	-0.893967	-0.888281	-0.89657	-0.83439	-0.728921	-0.641292	-0.579323	-0.514645	-0.449702	-0.340196
1.361	-1.22959	-1.01909	-0.890139	-0.884651	-0.892575	-0.82982	-0.725208	-0.63881	-0.578288	-0.513136	-0.448622	-0.338365
1.362	-1.22669	-1.01411	-0.886293	-0.880854	-0.88818	-0.825316	-0.722123	-0.63623	-0.577131	-0.511492	-0.447518	-0.337101
1.363	-1.22374	-1.009	-0.882489	-0.876824	-0.88373	-0.820942	-0.719638	-0.633354	-0.575825	-0.509605	-0.446401	-0.336383
1.364	-1.22062	-1.00385	-0.878793	-0.872694	-0.879594	-0.816942	-0.717722	-0.629977	-0.574176	-0.507377	-0.44524	-0.33607
1.365	-1.21727	-0.998875	-0.875192	-0.868625	-0.876011	-0.813523	-0.716193	-0.626123	-0.572026	-0.504829	-0.443837	-0.335993
1.366	-1.21377	-0.9943	-0.871659	-0.864586	-0.872998	-0.810697	-0.714647	-0.622026	-0.569348	-0.502124	-0.441997	-0.336021
1.367	-1.21027	-0.990147	-0.868197	-0.860374	-0.87048	-0.808307	-0.712687	-0.617968	-0.566213	-0.499405	-0.439745	-0.336007
1.368	-1.20691	-0.986256	-0.864758	-0.855864	-0.868405	-0.806181	-0.710213	-0.614164	-0.562883	-0.496745	-0.437255	-0.335769
1.369	-1.2038	-0.98248	-0.861174	-0.851128	-0.866611	-0.80418	-0.707403	-0.610752	-0.559829	-0.494255	-0.434711	-0.335255
1.37	-1.20082	-0.978771	-0.857287	-0.84627	-0.864847	-0.80211	-0.704501	-0.607818	-0.55743	-0.492105	-0.432269	-0.33458
1.371	-1.19778	-0.975082	-0.853108	-0.841228	-0.863012	-0.799691	-0.701628	-0.605364	-0.555684	-0.490349	-0.429987	-0.33377
1.372	-1.19453	-0.971325	-0.848778	-0.835994	-0.861163	-0.796768	-0.698828	-0.603266	-0.554411	-0.488829	-0.427878	-0.332669
1.373	-1.19111	-0.967481	-0.844397	-0.830881	-0.859279	-0.793462	-0.69624	-0.601428	-0.553548	-0.487393	-0.426065	-0.331181
1.374	-1.18765	-0.963643	-0.839988	-0.826245	-0.857111	-0.790049	-0.694006	-0.599911	-0.55305	-0.486078	-0.424759	-0.32939
1.375	-1.18422	-0.959903	-0.835678	-0.822132	-0.854215	-0.786725	-0.692054	-0.598758	-0.55269	-0.484941	-0.42406	-0.327436
1.376	-1.18084	-0.956314	-0.831681	-0.818391	-0.850338	-0.783594	-0.690199	-0.597816	-0.552143	-0.483881	-0.423878	-0.325449
1.377	-1.17761	-0.952874	-0.828074	-0.814916	-0.845721	-0.780788	-0.688407	-0.596811	-0.551256	-0.482669	-0.423981	-0.323517
1.378	-1.17463	-0.949438	-0.824753	-0.811668	-0.840743	-0.778369	-0.68671	-0.595565	-0.550095	-0.481094	-0.424094	-0.321772
1.379	-1.17195	-0.945797	-0.821556	-0.808552	-0.835554	-0.776209	-0.684948	-0.594122	-0.548728	-0.479065	-0.424072	-0.320402
1.38	-1.16953	-0.941859	-0.818383	-0.805362	-0.830225	-0.774101	-0.682749	-0.592641	-0.547056	-0.476601	-0.423907	-0.319388
1.381	-1.16731	-0.937631	-0.815176	-0.80189	-0.824954	-0.771997	-0.67983	-0.591226	-0.544863	-0.473831	-0.423617	-0.318581
1.382	-1.16518	-0.933144	-0.811812	-0.798024	-0.819988	-0.770047	-0.676337	-0.589886	-0.542117	-0.470994	-0.423163	-0.317938
1.383	-1.16302	-0.928511	-0.808164	-0.79383	-0.815413	-0.768351	-0.672672	-0.588607	-0.539077	-0.468368	-0.422464	-0.317449
1.384	-1.16072	-0.923971	-0.804226	-0.789488	-0.811125	-0.7667	-0.669156	-0.587407	-0.536013	-0.466148	-0.421496	-0.317017
1.385	-1.15817	-0.919798	-0.800102	-0.78511	-0.806983	-0.764619	-0.665955	-0.586304	-0.533045	-0.464332	-0.420162	-0.316501
1.386	-1.15532	-0.916067	-0.795923	-0.780734	-0.802979	-0.761726	-0.663088	-0.58528	-0.530218	-0.462773	-0.418249	-0.315868
1.387	-1.15218	-0.912582	-0.791732	-0.776456	-0.799296	-0.757996	-0.660508	-0.58425	-0.527571	-0.461283	-0.415712	-0.315233
1.388	-1.14865	-0.909118	-0.787521	-0.772436	-0.796056	-0.753623	-0.658201	-0.583124	-0.525163	-0.459759	-0.412682	-0.314714
1.389	-1.14461	-0.905631	-0.783403	-0.768733	-0.793165	-0.748837	-0.656153	-0.581966	-0.523104	-0.458289	-0.409337	-0.314319
1.39	-1.14005	-0.902147	-0.779578	-0.765207	-0.790481	-0.743918	-0.654322	-0.580956	-0.521456	-0.456991	-0.405993	-0.313987
1.391	-1.13504	-0.898613	-0.776139	-0.761727	-0.787895	-0.73915	-0.652716	-0.580157	-0.520084	-0.455771	-0.403066	-0.313683
1.392	-1.12956	-0.894972	-0.773003	-0.758347	-0.785323	-0.734751	-0.651407	-0.579366	-0.51889	-0.454433	-0.400846	-0.313362
1.393	-1.12362	-0.891268	-0.769974	-0.755238	-0.782717	-0.730876	-0.650304	-0.578338	-0.51796	-0.452935	-0.399323	-0.312942
1.394	-1.11734	-0.88753	-0.766918	-0.752481	-0.779973	-0.727516	-0.649118	-0.577143	-0.517254	-0.451377	-0.398331	-0.312393
1.395	-1.11096	-0.883677	-0.763877	-0.749915	-0.776891	-0.724444	-0.64758	-0.575967	-0.516517	-0.449855	-0.397826	-0.311758
1.396	-1.10469	-0.879624	-0.760895	-0.747205	-0.773344	-0.721448	-0.645592	-0.574712	-0.515547	-0.448427	-0.397788	-0.31102
1.397	-1.09876	-0.875359	-0.757925	-0.744082	-0.769485	-0.718555	-0.64323	-0.573209	-0.514287	-0.447047	-0.398026	-0.310049
1.398	-1.09331	-0.870973	-0.754913	-0.740512	-0.76559	-0.715917	-0.640598	-0.571585	-0.51277	-0.445644	-0.398351	-0.308734
1.399	-1.08832	-0.866598	-0.751806	-0.736608	-0.76175	-0.713572	-0.637753	-0.570063	-0.511012	-0.444305	-0.398747	-0.3071
1.4	-1.0837	-0.862307	-0.748602	-0.732511	-0.757885	-0.711407	-0.634807	-0.568642	-0.50893	-0.44313	-0.399197	-0.30533
1.401	-1.07942	-0.858151	-0.745365	-0.728396	-0.754029	-0.709271	-0.631976	-0.567183	-0.506509	-0.442126	-0.399483	-0.303648
1.402	-1.07544	-0.854213	-0.742101	-0.724441	-0.75032	-0.707049	-0.629517	-0.565594	-0.503867	-0.44137	-0.399235	-0.302225
1.403	-1.07173	-0.850557	-0.738741	-0.720756	-0.74677	-0.704632	-0.627534	-0.563827	-0.501067	-0.44097	-0.398222	-0.301202
1.404	-1.06827	-0.847195	-0.735182	-0.717313	-0.743337	-0.701938	-0.625903	-0.561706	-0.498157	-0.440858	-0.396652	-0.300558
1.405	-1.06512	-0.844074	-0.731328	-0.713984	-0.740154	-0.699072	-0.624364	-0.558902	-0.495383	-0.440735	-0.394909	-0.299982
1.406	-1.06233	-0.841071	-0.727175	-0.710752	-0.737355	-0.696258	-0.622691	-0.555164	-0.493141	-0.440332	-0.393014	-0.29916
1.407	-1.05984	-0.838053	-0.722819	-0.707756	-0.734771	-0.693636	-0.620871	-0.550599	-0.491644	-0.439653	-0.390769	-0.298064
1.408	-1.05752	-0.83486	-0.718422	-0.705085	-0.731966	-0.691152	-0.619027	-0.545641	-0.49077	-0.438846	-0.38825	-0.296808
1.409	-1.05533	-0.831336	-0.714161	-0.702696	-0.728608	-0.688533	-0.617189	-0.54075	-0.490323	-0.437987	-0.385728	-0.295441
1.41	-1.05316	-0.827504	-0.71019	-0.700492	-0.724786	-0.685558	-0.61527	-0.536281	-0.490248	-0.437074	-0.383304	-0.294003
1.411	-1.0509	-0.823569	-0.706574	-0.698308	-0.720884	-0.682306	-0.613229	-0.532519	-0.490412	-0.436128	-0.380874	-0.292601
1.412	-1.04854	-0.819708	-0.703286	-0.695875	-0.717185	-0.678922	-0.611147	-0.52958	-0.490484	-0.435197	-0.378422	-0.291248
1.413	-1.04624	-0.81597	-0.700294	-0.692961	-0.713728	-0.675442	-0.609114	-0.527267	-0.490237	-0.4342	-0.376159	-0.28974
1.414	-1.04415	-0.812412	-0.697539	-0.689544	-0.71046	-0.671954	-0.607178	-0.525129	-0.489679	-0.432916	-0.374308	-0.287998
1.415	-1.04225	-0.809111	-0.694896	-0.685803	-0.707244	-0.668589	-0.605399	-0.522828	-0.48882	-0.431152	-0.372887	-0.286353
1.416	-1.04045	-0.805988	-0.692264	-0.682014	-0.70376	-0.665377	-0.603754	-0.520339	-0.487486	-0.428862	-0.37171	-0.285238
1.417	-1.03872	-0.802841	-0.689667	-0.678342	-0.699724	-0.66227	-0.602049	-0.517803	-0.485388	-0.426202	-0.370618	-0.284711
1.418	-1.03687	-0.799494	-0.687195	-0.674778	-0.695173	-0.659267	-0.600211	-0.515268	-0.482475	-0.423444	-0.369617	-0.284452
1.419	-1.03468	-0.795921	-0.68479	-0.671384	-0.690488	-0.656372	-0.598505	-0.51257	-0.479101	-0.420805	-0.368692	-0.284231
1.42	-1.03209	-0.792237	-0.682256	-0.668261	-0.6861	-0.653476	-0.597216	-0.509614	-0.475716	-0.418403	-0.367673	-0.284144
1.421	-1.02911	-0.788587	-0.679572	-0.665285	-0.682198	-0.65041	-0.59628	-0.506665	-0.472496	-0.41639	-0.366449	-0.284309
1.422	-1.0258	-0.785119	-0.676955	-0.662205	-0.678811	-0.647177	-0.595351	-0.504161	-0.469351	-0.414981	-0.365208	-0.284522
1.423	-1.02241	-0.781926	-0.674593	-0.658911	-0.676012	-0.643986	-0.594105	-0.502277	-0.46627	-0.414066	-0.3642	-0.28444
1.424	-1.01926	-0.779039	-0.672466	-0.65548	-0.673858	-0.641065	-0.592379	-0.500769	-0.463501	-0.413159	-0.363445	-0.284006
1.425	-1.01641	-0.776483	-0.670445	-0.652071	-0.672213	-0.638491	-0.590062	-0.499348	-0.461294	-0.411978	-0.362895	-0.2835
1.426	-1.01364	-0.774177	-0.668494	-0.648832	-0.670758	-0.636122	-0.587044	-0.49794	-0.459601	-0.410592	-0.362617	-0.283207
1.427	-1.01058	-0.771921	-0.66664	-0.645768	-0.66914	-0.633831	-0.583396	-0.49656	-0.458257	-0.409102	-0.362651	-0.283084
1.428	-1.00692	-0.769597	-0.664806	-0.642732	-0.667116	-0.631736	-0.579527	-0.49511	-0.457262	-0.407413	-0.362841	-0.282873
1.429	-1.00258	-0.76722	-0.662843	-0.639637	-0.664627	-0.629982	-0.575887	-0.493345	-0.456611	-0.405336	-0.362898	-0.282517
1.43	-0.997597	-0.764746	-0.660676	-0.636466	-0.661698	-0.628449	-0.572515	-0.491189	-0.456127	-0.402938	-0.362644	-0.28215
1.431	-0.992023	-0.762028	-0.658312	-0.633145	-0.658332	-0.626856	-0.569041	-0.488911	-0.455518	-0.400582	-0.362162	-0.281775
1.432	-0.985864	-0.759042	-0.65579	-0.629652	-0.654662	-0.625119	-0.565168	-0.486759	-0.454568	-0.398548	-0.361648	-0.281283
1.433	-0.979305	-0.755946	-0.653149	-0.626143	-0.651	-0.623481	-0.56105	-0.484611	-0.453364	-0.396803	-0.361202	-0.280578
1.434	-0.972713	-0.752931	-0.650379	-0.62283	-0.647621	-0.622209	-0.557142	-0.48213	-0.452113	-0.39518	-0.360769	-0.279598
1.435	-0.966134	-0.750059	-0.647403	-0.619838	-0.64465	-0.621279	-0.553837	-0.47932	-0.450835	-0.393748	-0.360241	-0.278397
1.436	-0.95905	-0.747236	-0.644219	-0.617175	-0.642044	-0.620394	-0.55132	-0.47667	-0.449486	-0.392754	-0.35963	-0.277073
1.437	-0.950911	-0.744426	-0.640959	-0.614762	-0.639667	-0.619145	-0.549621	-0.474575	-0.44819	-0.392209	-0.359032	-0.275564
1.438	-0.941711	-0.741775	-0.637715	-0.612541	-0.637467	-0.617274	-0.548688	-0.472976	-0.447202	-0.391857	-0.35844	-0.27371
1.439	-0.931962	-0.739424	-0.634423	-0.61049	-0.63549	-0.614787	-0.548374	-0.471657	-0.446657	-0.391575	-0.357746	-0.271537
1.44	-0.9224	-0.737309	-0.63101	-0.608522	-0.633672	-0.611777	-0.548389	-0.470502	-0.44636	-0.391346	-0.356867	-0.269389
1.441	-0.913755	-0.735246	-0.627537	-0.606502	-0.63182	-0.608335	-0.54835	-0.469352	-0.445928	-0.390954	-0.355861	-0.267675
1.442	-0.906557	-0.733141	-0.624194	-0.604346	-0.629894	-0.604656	-0.548023	-0.467974	-0.445234	-0.390094	-0.354895	-0.266501
1.443	-0.901055	-0.730974	-0.621151	-0.602062	-0.627999	-0.60102	-0.547434	-0.46634	-0.44448	-0.388722	-0.353948	-0.265718
1.444	-0.897269	-0.728706	-0.618373	-0.599722	-0.626063	-0.597662	-0.546627	-0.46474	-0.443727	-0.387101	-0.352774	-0.265213
1.445	-0.895053	-0.726265	-0.615761	-0.597425	-0.62384	-0.594724	-0.545523	-0.463492	-0.442736	-0.385536	-0.35125	-0.264993
1.446	-0.894209	-0.723557	-0.61343	-0.595221	-0.621234	-0.592244	-0.543986	-0.462665	-0.44143	-0.384072	-0.34952	-0.265058
1.447	-0.894609	-0.720541	-0.611579	-0.593132	-0.61838	-0.590238	-0.541952	-0.462193	-0.440065	-0.382552	-0.347785	-0.265332
1.448	-0.896212	-0.717229	-0.610161	-0.591217	-0.615372	-0.588731	-0.539618	-0.462021	-0.438781	-0.380967	-0.346074	-0.265722
1.449	-0.898949	-0.713638	-0.608845	-0.589474	-0.612132	-0.5876	-0.537296	-0.462092	-0.437401	-0.379448	-0.344348	-0.266174
1.45	-0.902569	-0.709828	-0.607361	-0.587787	-0.608596	-0.586496	-0.535012	-0.462249	-0.435781	-0.378008	-0.342737	-0.266613
1.451	-0.906671	-0.705913	-0.605669	-0.586096	-0.604878	-0.585076	-0.532566	-0.462228	-0.43402	-0.376542	-0.341448	-0.266773
1.452	-0.910887	-0.70208	-0.603747	-0.584408	-0.601246	-0.583199	-0.529942	-0.461792	-0.432247	-0.375059	-0.340415	-0.266376
1.453	-0.914957	-0.698557	-0.60148	-0.582693	-0.597894	-0.580858	-0.527359	-0.460921	-0.430467	-0.373691	-0.3393	-0.265439
1.454	-0.918635	-0.695445	-0.598806	-0.580908	-0.594843	-0.57807	-0.524967	-0.459769	-0.42874	-0.372493	-0.337928	-0.264039
1.455	-0.921672	-0.692654	-0.595854	-0.579015	-0.592137	-0.574866	-0.52273	-0.458428	-0.427256	-0.371421	-0.336418	-0.262093
1.456	-0.923938	-0.690067	-0.592855	-0.577022	-0.589858	-0.5714	-0.520654	-0.456915	-0.426147	-0.370393	-0.334904	-0.259565
1.457	-0.925443	-0.687671	-0.589839	-0.575046	-0.588	-0.567932	-0.518938	-0.455332	-0.425326	-0.369238	-0.333425	-0.256703
1.458	-0.926173	-0.685443	-0.586626	-0.573275	-0.586532	-0.564556	-0.517689	-0.45386	-0.424608	-0.36783	-0.332046	-0.253924
1.459	-0.92603	-0.683241	-0.583182	-0.57187	-0.585411	-0.561148	-0.516607	-0.452588	-0.423937	-0.366259	-0.330965	-0.251472
1.46	-0.925053	-0.680883	-0.579734	-0.570923	-0.584535	-0.557652	-0.515312	-0.451433	-0.423383	-0.364773	-0.330354	-0.249388
1.461	-0.923484	-0.678266	-0.576533	-0.570423	-0.583792	-0.554207	-0.513731	-0.450227	-0.422868	-0.363611	-0.330013	-0.24775
1.462	-0.921578	-0.67538	-0.573664	-0.570237	-0.582956	-0.551009	-0.511916	-0.44888	-0.422139	-0.36288	-0.329524	-0.246745
1.463	-0.919571	-0.672217	-0.571058	-0.570172	-0.581738	-0.54817	-0.509885	-0.447431	-0.421029	-0.362485	-0.328808	-0.246499
1.464	-0.917735	-0.668787	-0.568592	-0.570053	-0.580034	-0.545726	-0.50769	-0.445942	-0.419611	-0.362144	-0.328157	-0.246929
1.465	-0.916281	-0.665186	-0.566195	-0.569642	-0.577911	-0.543722	-0.505428	-0.444452	-0.418154	-0.361625	-0.327732	-0.247869
1.466	-0.915257	-0.661525	-0.56386	-0.568698	-0.575435	-0.54218	-0.503219	-0.442967	-0.416784	-0.361024	-0.327359	-0.249317
1.467	-0.914589	-0.657886	-0.561582	-0.56712	-0.572625	-0.540983	-0.501055	-0.441435	-0.415297	-0.360644	-0.326802	-0.251366
1.468	-0.914153	-0.654434	-0.559352	-0.564897	-0.569559	-0.539881	-0.498794	-0.439848	-0.41351	-0.360607	-0.326072	-0.253897
1.469	-0.913718	-0.651466	-0.557212	-0.562103	-0.566507	-0.538657	-0.496436	-0.438201	-0.411538	-0.360718	-0.325336	-0.256617
1.47	-0.913075	-0.649319	-0.555231	-0.55897	-0.563818	-0.537202	-0.494245	-0.436406	-0.409659	-0.360727	-0.324591	-0.259336
1.471	-0.912241	-0.64817	-0.553423	-0.55575	-0.561669	-0.535424	-0.492525	-0.434417	-0.408059	-0.360561	-0.323703	-0.261977
1.472	-0.911328	-0.647867	-0.551801	-0.552522	-0.560041	-0.53325	-0.491299	-0.432357	-0.406736	-0.360276	-0.322738	-0.264412
1.473	-0.910356	-0.648018	-0.550444	-0.549224	-0.558792	-0.530791	-0.490337	-0.430378	-0.405671	-0.35979	-0.321885	-0.266297
1.474	-0.909374	-0.648269	-0.549325	-0.545862	-0.557669	-0.528316	-0.489509	-0.428548	-0.405041	-0.358818	-0.321124	-0.267261
1.475	-0.908469	-0.648416	-0.548244	-0.542605	-0.556454	-0.525982	-0.488941	-0.426939	-0.40505	-0.357187	-0.320221	-0.267317
1.476	-0.90758	-0.648276	-0.547115	-0.53959	-0.55501	-0.523676	-0.488719	-0.425684	-0.405576	-0.355029	-0.319103	-0.26676
1.477	-0.906503	-0.647672	-0.546049	-0.536758	-0.553216	-0.521276	-0.488645	-0.425003	-0.406185	-0.352621	-0.31805	-0.265775
1.478	-0.905105	-0.646542	-0.545077	-0.534038	-0.551124	-0.518986	-0.48851	-0.425026	-0.406536	-0.350216	-0.317421	-0.26437
1.479	-0.903434	-0.644964	-0.544041	-0.531497	-0.54897	-0.517185	-0.488318	-0.425516	-0.406621	-0.348043	-0.317196	-0.262594
1.48	-0.901605	-0.64299	-0.542819	-0.529156	-0.546836	-0.51605	-0.488008	-0.426097	-0.406525	-0.346251	-0.316967	-0.260679
1.481	-0.899647	-0.640644	-0.541543	-0.526798	-0.544584	-0.515468	-0.487277	-0.426551	-0.4062	-0.34482	-0.316483	-0.258948
1.482	-0.897559	-0.638047	-0.540419	-0.524208	-0.542211	-0.515284	-0.485914	-0.426699	-0.405619	-0.343607	-0.31588	-0.257552
1.483	-0.895408	-0.635373	-0.539505	-0.521454	-0.539939	-0.515501	-0.484073	-0.426332	-0.404887	-0.342446	-0.315233	-0.25641
1.484	-0.893248	-0.632725	-0.538684	-0.518682	-0.537899	-0.516092	-0.482038	-0.425445	-0.404077	-0.341278	-0.314331	-0.255446
1.485	-0.891008	-0.630138	-0.537691	-0.515879	-0.535911	-0.516763	-0.479967	-0.424228	-0.403165	-0.340146	-0.312993	-0.254694
1.486	-0.888542	-0.627644	-0.536313	-0.513003	-0.53367	-0.517064	-0.477897	-0.4228	-0.402112	-0.339023	-0.311322	-0.254141
1.487	-0.885718	-0.625275	-0.534552	-0.510205	-0.531084	-0.516648	-0.475871	-0.421113	-0.400968	-0.337768	-0.309609	-0.253576
1.488	-0.8824	-0.623013	-0.532511	-0.507747	-0.528292	-0.515395	-0.474073	-0.41907	-0.399933	-0.336335	-0.30809	-0.25274
1.489	-0.878429	-0.620813	-0.530271	-0.505734	-0.525444	-0.51344	-0.472653	-0.41672	-0.39916	-0.334959	-0.306699	-0.251517
1.49	-0.873646	-0.618667	-0.527898	-0.503997	-0.522553	-0.511015	-0.471371	-0.414276	-0.398532	-0.333912	-0.305213	-0.249923
1.491	-0.867969	-0.616577	-0.525458	-0.50225	-0.519625	-0.508312	-0.469763	-0.41181	-0.397813	-0.333145	-0.303759	-0.247976
1.492	-0.861493	-0.61447	-0.52299	-0.500396	-0.516842	-0.505509	-0.4676	-0.409112	-0.39695	-0.332397	-0.302886	-0.245596
1.493	-0.854547	-0.612178	-0.520522	-0.498625	-0.514465	-0.502818	-0.46494	-0.40598	-0.396075	-0.331526	-0.302956	-0.242774
1.494	-0.847572	-0.609534	-0.518055	-0.497071	-0.512581	-0.500462	-0.461937	-0.402537	-0.395209	-0.330616	-0.303824	-0.239756
1.495	-0.840912	-0.606529	-0.515555	-0.49561	-0.511023	-0.498485	-0.458772	-0.39916	-0.394076	-0.329795	-0.305146	-0.236846
1.496	-0.834716	-0.603309	-0.513021	-0.494086	-0.509551	-0.496738	-0.455631	-0.396161	-0.392372	-0.329058	-0.306683	-0.234199
1.497	-0.829091	-0.600044	-0.510529	-0.492496	-0.5081	-0.495179	-0.452629	-0.393664	-0.390118	-0.328365	-0.308264	-0.231867
1.498	-0.824189	-0.596831	-0.508113	-0.490909	-0.506783	-0.493845	-0.449872	-0.391675	-0.387532	-0.327762	-0.309608	-0.229863
1.499	-0.820087	-0.593756	-0.5057	-0.489379	-0.50569	-0.492542	-0.447543	-0.390066	-0.384684	-0.327313	-0.310334	-0.228289
1.5	-0.816688	-0.59102	-0.503215	-0.487882	-0.504729	-0.490943	-0.445736	-0.388625	-0.381531	-0.326939	-0.310245	-0.227271
1.501	-0.813812	-0.588758	-0.500633	-0.486374	-0.503737	-0.488914	-0.444346	-0.387217	-0.378177	-0.326448	-0.309425	-0.226627
1.502	-0.811304	-0.586849	-0.497955	-0.484876	-0.502595	-0.486565	-0.443301	-0.385878	-0.374827	-0.325809	-0.307956	-0.225942
1.503	-0.809033	-0.585059	-0.495278	-0.483413	-0.501106	-0.484082	-0.442634	-0.384711	-0.371557	-0.325215	-0.305856	-0.22513
1.504	-0.806894	-0.583205	-0.492754	-0.481982	-0.499098	-0.481521	-0.442225	-0.38372	-0.368355	-0.324805	-0.303344	-0.22443
1.505	-0.804857	-0.581151	-0.490515	-0.480663	-0.496711	-0.478864	-0.441787	-0.382746	-0.365387	-0.324475	-0.300821	-0.22386
1.506	-0.802972	-0.57882	-0.48862	-0.479594	-0.494296	-0.476253	-0.441155	-0.381671	-0.363012	-0.324083	-0.29853	-0.22322
1.507	-0.801268	-0.576232	-0.487037	-0.478837	-0.49204	-0.473915	-0.440412	-0.380663	-0.361482	-0.323684	-0.296534	-0.222549
1.508	-0.799741	-0.573488	-0.485732	-0.478407	-0.489823	-0.471923	-0.439616	-0.380019	-0.360639	-0.323384	-0.295087	-0.222078
1.509	-0.798457	-0.570683	-0.484713	-0.478359	-0.487526	-0.470201	-0.438518	-0.379802	-0.360034	-0.323098	-0.294543	-0.221852
1.51	-0.797554	-0.567922	-0.483929	-0.478643	-0.48531	-0.468763	-0.436849	-0.37986	-0.359379	-0.322605	-0.294861	-0.221728
1.511	-0.797139	-0.5654	-0.483217	-0.479004	-0.48336	-0.467716	-0.434708	-0.380078	-0.358694	-0.321845	-0.295626	-0.221622
1.512	-0.797241	-0.563291	-0.482342	-0.479168	-0.481576	-0.467073	-0.43238	-0.380454	-0.35798	-0.321008	-0.296523	-0.221621
1.513	-0.797738	-0.561648	-0.481111	-0.478948	-0.4797	-0.466676	-0.429999	-0.381034	-0.357073	-0.320313	-0.297455	-0.22187
1.514	-0.79841	-0.560391	-0.479519	-0.478177	-0.477584	-0.466236	-0.427552	-0.381682	-0.355842	-0.319797	-0.298412	-0.222324
1.515	-0.799105	-0.559289	-0.477736	-0.476749	-0.475281	-0.465537	-0.425042	-0.382098	-0.35428	-0.319342	-0.299476	-0.222796
1.516	-0.799709	-0.558123	-0.47595	-0.47468	-0.473013	-0.464535	-0.422659	-0.382193	-0.352467	-0.318819	-0.300713	-0.223239
1.517	-0.800022	-0.556825	-0.474341	-0.472129	-0.47102	-0.463241	-0.420727	-0.382144	-0.350566	-0.318177	-0.301948	-0.223666
1.518	-0.799843	-0.555457	-0.473019	-0.469312	-0.469362	-0.46168	-0.419417	-0.382105	-0.348737	-0.317449	-0.302781	-0.223886
1.519	-0.799047	-0.554131	-0.471915	-0.466334	-0.467941	-0.459919	-0.4187	-0.382062	-0.34696	-0.316703	-0.302915	-0.223629
1.52	-0.797513	-0.55292	-0.470886	-0.463204	-0.46671	-0.458047	-0.418531	-0.381956	-0.345167	-0.315933	-0.302318	-0.222809
1.521	-0.795196	-0.551835	-0.469803	-0.460032	-0.465673	-0.456154	-0.418797	-0.381784	-0.343471	-0.315118	-0.301123	-0.221507
1.522	-0.792233	-0.550871	-0.46857	-0.45706	-0.464731	-0.454284	-0.419255	-0.381521	-0.34212	-0.314375	-0.299574	-0.21987
1.523	-0.788842	-0.54997	-0.467201	-0.454438	-0.463757	-0.452399	-0.419699	-0.381101	-0.341298	-0.313806	-0.298024	-0.218021
1.524	-0.78515	-0.549038	-0.465759	-0.452103	-0.462709	-0.450384	-0.420004	-0.380459	-0.340964	-0.313264	-0.296684	-0.216057
1.525	-0.781254	-0.547968	-0.464267	-0.449876	-0.461606	-0.448193	-0.420084	-0.37951	-0.340934	-0.31255	-0.295469	-0.214146
1.526	-0.777417	-0.546706	-0.462786	-0.447634	-0.460514	-0.445941	-0.41993	-0.378256	-0.341147	-0.311606	-0.29425	-0.21247
1.527	-0.773996	-0.545346	-0.461497	-0.445446	-0.459434	-0.443751	-0.419511	-0.37679	-0.341637	-0.310409	-0.29301	-0.211092
1.528	-0.771131	-0.544022	-0.460545	-0.443529	-0.458305	-0.441728	-0.418742	-0.375267	-0.342325	-0.308949	-0.291756	-0.209997
1.529	-0.768664	-0.542751	-0.45985	-0.442047	-0.457146	-0.440086	-0.417657	-0.373896	-0.343009	-0.307269	-0.290437	-0.209216
1.53	-0.766388	-0.541439	-0.459233	-0.441008	-0.455957	-0.438972	-0.41634	-0.372723	-0.343523	-0.305486	-0.28896	-0.208867
1.531	-0.764238	-0.539948	-0.458523	-0.440324	-0.454643	-0.438199	-0.414806	-0.371624	-0.34379	-0.303824	-0.287329	-0.208981
1.532	-0.762244	-0.538232	-0.457559	-0.439833	-0.45312	-0.437409	-0.41305	-0.370455	-0.343652	-0.302481	-0.285625	-0.209398
1.533	-0.76033	-0.536411	-0.456263	-0.439299	-0.451405	-0.436486	-0.41114	-0.368995	-0.342933	-0.301482	-0.283765	-0.209931
1.534	-0.758286	-0.534648	-0.454662	-0.438592	-0.449679	-0.435582	-0.409284	-0.367018	-0.341687	-0.30076	-0.281609	-0.210486
1.535	-0.755973	-0.533026	-0.452774	-0.437686	-0.44814	-0.434794	-0.407658	-0.364607	-0.340163	-0.300335	-0.279199	-0.211009
1.536	-0.753344	-0.531505	-0.45064	-0.436489	-0.446742	-0.434003	-0.406227	-0.362049	-0.338607	-0.300274	-0.276632	-0.211358
1.537	-0.750329	-0.529911	-0.448452	-0.434933	-0.44532	-0.432984	-0.404844	-0.359503	-0.337195	-0.300389	-0.273927	-0.211401
1.538	-0.746904	-0.52806	-0.446409	-0.433177	-0.443981	-0.431614	-0.403436	-0.357103	-0.336037	-0.300349	-0.271055	-0.211222
1.539	-0.743163	-0.52597	-0.444528	-0.431457	-0.442928	-0.429976	-0.402119	-0.3551	-0.335221	-0.300121	-0.267979	-0.211042
1.54	-0.739235	-0.523824	-0.442775	-0.429847	-0.442034	-0.428164	-0.401092	-0.353693	-0.334774	-0.299961	-0.264821	-0.21106
1.541	-0.735205	-0.521737	-0.441196	-0.428357	-0.440974	-0.426165	-0.400419	-0.352969	-0.334538	-0.300037	-0.261839	-0.211329
1.542	-0.731135	-0.519765	-0.439908	-0.42709	-0.439643	-0.424006	-0.400026	-0.352863	-0.334289	-0.30028	-0.259223	-0.211681
1.543	-0.727098	-0.518018	-0.438954	-0.426146	-0.438332	-0.421893	-0.399868	-0.353126	-0.333946	-0.300628	-0.25712	-0.211911
1.544	-0.723191	-0.516566	-0.438154	-0.42552	-0.437476	-0.420139	-0.399931	-0.353482	-0.333589	-0.301207	-0.255661	-0.211986
1.545	-0.719501	-0.515331	-0.437298	-0.425083	-0.437206	-0.418874	-0.400067	-0.353733	-0.333281	-0.302032	-0.254842	-0.212012
1.546	-0.716035	-0.514174	-0.436331	-0.424617	-0.437271	-0.417927	-0.399969	-0.353653	-0.332922	-0.302819	-0.254588	-0.212122
1.547	-0.712789	-0.512998	-0.435273	-0.423989	-0.437318	-0.417121	-0.399338	-0.353021	-0.332367	-0.303311	-0.254827	-0.212357
1.548	-0.709805	-0.511669	-0.434194	-0.423255	-0.437089	-0.416441	-0.39809	-0.351889	-0.331632	-0.303503	-0.255471	-0.21261
1.549	-0.707033	-0.510042	-0.433176	-0.422493	-0.436379	-0.415912	-0.396365	-0.350589	-0.33089	-0.303503	-0.256362	-0.212746
1.55	-0.704371	-0.508119	-0.432257	-0.421663	-0.435032	-0.415488	-0.39434	-0.349402	-0.330245	-0.303316	-0.257256	-0.212779
1.551	-0.701845	-0.506049	-0.431439	-0.420655	-0.433088	-0.415083	-0.392137	-0.348331	-0.329628	-0.302794	-0.257942	-0.212793
1.552	-0.699546	-0.504005	-0.430629	-0.419368	-0.430784	-0.414638	-0.38985	-0.347155	-0.32901	-0.301851	-0.258368	-0.212812
1.553	-0.697593	-0.502091	-0.429658	-0.41772	-0.428432	-0.414096	-0.387548	-0.345631	-0.328499	-0.300577	-0.258541	-0.212852
1.554	-0.696103	-0.500331	-0.428411	-0.415689	-0.426318	-0.413366	-0.385303	-0.343693	-0.328282	-0.299043	-0.25845	-0.212884
1.555	-0.695089	-0.498698	-0.426833	-0.413374	-0.424648	-0.412352	-0.3832	-0.341474	-0.328551	-0.297292	-0.258142	-0.212768
1.556	-0.694491	-0.497177	-0.424954	-0.410945	-0.423585	-0.410952	-0.3813	-0.3392	-0.329325	-0.295493	-0.257779	-0.2123
1.557	-0.694135	-0.495713	-0.422942	-0.408569	-0.423232	-0.40905	-0.379614	-0.33713	-0.330379	-0.293834	-0.257514	-0.211304
1.558	-0.693698	-0.49423	-0.421015	-0.406381	-0.423486	-0.406609	-0.378101	-0.335438	-0.331451	-0.292343	-0.257332	-0.20975
1.559	-0.692972	-0.492801	-0.419308	-0.404418	-0.423968	-0.403797	-0.376678	-0.334087	-0.332438	-0.290897	-0.257086	-0.207847
1.56	-0.692001	-0.49154	-0.417805	-0.402656	-0.424272	-0.401059	-0.375332	-0.332917	-0.333323	-0.289426	-0.25676	-0.205964
1.561	-0.690913	-0.49034	-0.416437	-0.40104	-0.424141	-0.398909	-0.374174	-0.331944	-0.333952	-0.288024	-0.256542	-0.204336
1.562	-0.689867	-0.488953	-0.415209	-0.399424	-0.423348	-0.397498	-0.373278	-0.331298	-0.334002	-0.286785	-0.256609	-0.202933
1.563	-0.689038	-0.487204	-0.414158	-0.397599	-0.421756	-0.396718	-0.372582	-0.330892	-0.33324	-0.285702	-0.257112	-0.201627
1.564	-0.688634	-0.485014	-0.413277	-0.395441	-0.419473	-0.396541	-0.37204	-0.330536	-0.331725	-0.284713	-0.258177	-0.200379
1.565	-0.688828	-0.482435	-0.412486	-0.392916	-0.41676	-0.396954	-0.371633	-0.330134	-0.3297	-0.283779	-0.259721	-0.199236
1.566	-0.68959	-0.479783	-0.411631	-0.390036	-0.413825	-0.397801	-0.371265	-0.329584	-0.327454	-0.282926	-0.261414	-0.198243
1.567	-0.69072	-0.477477	-0.410583	-0.386922	-0.410729	-0.398819	-0.370822	-0.32882	-0.325258	-0.282185	-0.262846	-0.19746
1.568	-0.692024	-0.475734	-0.409315	-0.383791	-0.407536	-0.399771	-0.370278	-0.327894	-0.323169	-0.281576	-0.263734	-0.197076
1.569	-0.69339	-0.474539	-0.407819	-0.380883	-0.40444	-0.40048	-0.369679	-0.326896	-0.321058	-0.281179	-0.263982	-0.197297
1.57	-0.694752	-0.473701	-0.406052	-0.378443	-0.401663	-0.400754	-0.369096	-0.325932	-0.318988	-0.280974	-0.263662	-0.19805
1.571	-0.695973	-0.472974	-0.404069	-0.376649	-0.39928	-0.400396	-0.368565	-0.325116	-0.317188	-0.280794	-0.262984	-0.198886
1.572	-0.696864	-0.472315	-0.402086	-0.375488	-0.397199	-0.399324	-0.368023	-0.324417	-0.315731	-0.280459	-0.26215	-0.199232
1.573	-0.697322	-0.471897	-0.400271	-0.374723	-0.395384	-0.397597	-0.367408	-0.323638	-0.314509	-0.27979	-0.261208	-0.198714
1.574	-0.697319	-0.471816	-0.398595	-0.374155	-0.393988	-0.395389	-0.366752	-0.322597	-0.313408	-0.278709	-0.260101	-0.197248
1.575	-0.696834	-0.472007	-0.396927	-0.37382	-0.3931	-0.392946	-0.36611	-0.321242	-0.312404	-0.277376	-0.258926	-0.19503
1.576	-0.695842	-0.472317	-0.395147	-0.373834	-0.392554	-0.390492	-0.365499	-0.319712	-0.31151	-0.276089	-0.257987	-0.192398
1.577	-0.694212	-0.472464	-0.393206	-0.374181	-0.392051	-0.388236	-0.364883	-0.318241	-0.31067	-0.274964	-0.25744	-0.189645
1.578	-0.691745	-0.47218	-0.391166	-0.374696	-0.391353	-0.386448	-0.364175	-0.316946	-0.309757	-0.273839	-0.257095	-0.187051
1.579	-0.688349	-0.471393	-0.389123	-0.375195	-0.390367	-0.385311	-0.363316	-0.315845	-0.30865	-0.272625	-0.256719	-0.184974
1.58	-0.684128	-0.470102	-0.387099	-0.375561	-0.389008	-0.384736	-0.362312	-0.314986	-0.307324	-0.271533	-0.256279	-0.183675
1.581	-0.679332	-0.468306	-0.385123	-0.375711	-0.387124	-0.38448	-0.361234	-0.314453	-0.305838	-0.270795	-0.255808	-0.1831
1.582	-0.674203	-0.46614	-0.383305	-0.375579	-0.384714	-0.384366	-0.360177	-0.314206	-0.304351	-0.270388	-0.255295	-0.18301
1.583	-0.668956	-0.463833	-0.381718	-0.375107	-0.382112	-0.384356	-0.35921	-0.314061	-0.303095	-0.270149	-0.254753	-0.183275
1.584	-0.663769	-0.461508	-0.380314	-0.374201	-0.37972	-0.384382	-0.358317	-0.313847	-0.302139	-0.270011	-0.254203	-0.183922
1.585	-0.658715	-0.459138	-0.379051	-0.372851	-0.377672	-0.384243	-0.357378	-0.313497	-0.301314	-0.269985	-0.253619	-0.184962
1.586	-0.65385	-0.456691	-0.377989	-0.371217	-0.375887	-0.383662	-0.356247	-0.312965	-0.300437	-0.270041	-0.252985	-0.186335
1.587	-0.649242	-0.454297	-0.37718	-0.369507	-0.374283	-0.38244	-0.354942	-0.312184	-0.299478	-0.270132	-0.252335	-0.187965
1.588	-0.644942	-0.452213	-0.376606	-0.367886	-0.372901	-0.380626	-0.353594	-0.31116	-0.298555	-0.270285	-0.251738	-0.189728
1.589	-0.641116	-0.45058	-0.376132	-0.366412	-0.371854	-0.378415	-0.35223	-0.309961	-0.297772	-0.27051	-0.251337	-0.191453
1.59	-0.637995	-0.449313	-0.375482	-0.365004	-0.371163	-0.375958	-0.350776	-0.308573	-0.297158	-0.270618	-0.251261	-0.192934
1.591	-0.635605	-0.448177	-0.374421	-0.363607	-0.370795	-0.373372	-0.349257	-0.306908	-0.296698	-0.270411	-0.251451	-0.19394
1.592	-0.633708	-0.446925	-0.372936	-0.362255	-0.370755	-0.370747	-0.347858	-0.304997	-0.296278	-0.269846	-0.251672	-0.194344
1.593	-0.632034	-0.445466	-0.371186	-0.360951	-0.371015	-0.368126	-0.346719	-0.303027	-0.295698	-0.268858	-0.251819	-0.194283
1.594	-0.630451	-0.443873	-0.369372	-0.359687	-0.371515	-0.365594	-0.34577	-0.3011	-0.29476	-0.267327	-0.252012	-0.194019
1.595	-0.628881	-0.442227	-0.367656	-0.358494	-0.372152	-0.363357	-0.344901	-0.29913	-0.29337	-0.265349	-0.252253	-0.193637
1.596	-0.627275	-0.440534	-0.366088	-0.357324	-0.372766	-0.361722	-0.344148	-0.297055	-0.291657	-0.263287	-0.252332	-0.193015
1.597	-0.625608	-0.438847	-0.364595	-0.356042	-0.373174	-0.360889	-0.343683	-0.295018	-0.289901	-0.261461	-0.252153	-0.192039
1.598	-0.623831	-0.437258	-0.363069	-0.35461	-0.373165	-0.360734	-0.343596	-0.293291	-0.28828	-0.260021	-0.251801	-0.190762
1.599	-0.621964	-0.4358	-0.361487	-0.353141	-0.372609	-0.360951	-0.343726	-0.292162	-0.286777	-0.259016	-0.251335	-0.189368
1.6	-0.620054	-0.434561	-0.359971	-0.35173	-0.371568	-0.36127	-0.343824	-0.291878	-0.285401	-0.258359	-0.25068	-0.188081
1.601	-0.617974	-0.433676	-0.358673	-0.350419	-0.37012	-0.361448	-0.343783	-0.292528	-0.284298	-0.25795	-0.249712	-0.187086
1.602	-0.615557	-0.433064	-0.35765	-0.349255	-0.368236	-0.361255	-0.343623	-0.29398	-0.283504	-0.25779	-0.248475	-0.186426
1.603	-0.61283	-0.432468	-0.356909	-0.348247	-0.365896	-0.360601	-0.343255	-0.295997	-0.282838	-0.257863	-0.247087	-0.186012
1.604	-0.609977	-0.431702	-0.356445	-0.347377	-0.363202	-0.3596	-0.3425	-0.298381	-0.282231	-0.258041	-0.245522	-0.185673
1.605	-0.607257	-0.430721	-0.356171	-0.346693	-0.360384	-0.358359	-0.341412	-0.300845	-0.281913	-0.258147	-0.243757	-0.185169
1.606	-0.605011	-0.429592	-0.355956	-0.346259	-0.357695	-0.356896	-0.340316	-0.302994	-0.282222	-0.258007	-0.241952	-0.184336
1.607	-0.603614	-0.428372	-0.355656	-0.346044	-0.355299	-0.355251	-0.339437	-0.30462	-0.283269	-0.257529	-0.240237	-0.183245
1.608	-0.603339	-0.427027	-0.35512	-0.345941	-0.353253	-0.3534	-0.338719	-0.305778	-0.284838	-0.256713	-0.238549	-0.182059
1.609	-0.604234	-0.425562	-0.354377	-0.345836	-0.35159	-0.351259	-0.338022	-0.306498	-0.286639	-0.255599	-0.236839	-0.180788
1.61	-0.606187	-0.424053	-0.353591	-0.345672	-0.350411	-0.348973	-0.337319	-0.306703	-0.288551	-0.254269	-0.235156	-0.179417
1.611	-0.609051	-0.422546	-0.352866	-0.345429	-0.349708	-0.346843	-0.336656	-0.306378	-0.29047	-0.252819	-0.23342	-0.17812
1.612	-0.612652	-0.421038	-0.352234	-0.345061	-0.349233	-0.345026	-0.335941	-0.305652	-0.292076	-0.251347	-0.231513	-0.177172
1.613	-0.616814	-0.419513	-0.351696	-0.344474	-0.348746	-0.343541	-0.334959	-0.304831	-0.293009	-0.249984	-0.229688	-0.176727
1.614	-0.621349	-0.418004	-0.351282	-0.343535	-0.348233	-0.342355	-0.333642	-0.304207	-0.293182	-0.248751	-0.228461	-0.176724
1.615	-0.626035	-0.416652	-0.35098	-0.342154	-0.347818	-0.341421	-0.332153	-0.303755	-0.292727	-0.247492	-0.228008	-0.176958
1.616	-0.630665	-0.415609	-0.350614	-0.340356	-0.347638	-0.340758	-0.330711	-0.303217	-0.291788	-0.246088	-0.228038	-0.177234
1.617	-0.635058	-0.414916	-0.350007	-0.338256	-0.347737	-0.340388	-0.32943	-0.302363	-0.290422	-0.244574	-0.228196	-0.177469
1.618	-0.63901	-0.414514	-0.349092	-0.336023	-0.34798	-0.340237	-0.328346	-0.301038	-0.288643	-0.243003	-0.228246	-0.177705
1.619	-0.642372	-0.414322	-0.347879	-0.333864	-0.348155	-0.34018	-0.327488	-0.299143	-0.286511	-0.241402	-0.22799	-0.17799
1.62	-0.645093	-0.414239	-0.346464	-0.331972	-0.348169	-0.340105	-0.326866	-0.296705	-0.284077	-0.239858	-0.227286	-0.178094
1.621	-0.647073	-0.414116	-0.344963	-0.330492	-0.348035	-0.339963	-0.326482	-0.293946	-0.281362	-0.238511	-0.226175	-0.177573
1.622	-0.648073	-0.413798	-0.343443	-0.329448	-0.347695	-0.339826	-0.326352	-0.291121	-0.278504	-0.237384	-0.224822	-0.176284
1.623	-0.647915	-0.413223	-0.341939	-0.328636	-0.347093	-0.339791	-0.326452	-0.288265	-0.275805	-0.236306	-0.223339	-0.174512
1.624	-0.646629	-0.412469	-0.340453	-0.327882	-0.346298	-0.339757	-0.326667	-0.285275	-0.27351	-0.235145	-0.221938	-0.172656
1.625	-0.644319	-0.41163	-0.339018	-0.327349	-0.345357	-0.33952	-0.326906	-0.282312	-0.271642	-0.234052	-0.221149	-0.170994
1.626	-0.641077	-0.410622	-0.337778	-0.327312	-0.3442	-0.339065	-0.327104	-0.279782	-0.270042	-0.233315	-0.221388	-0.16964
1.627	-0.636991	-0.409303	-0.336868	-0.327802	-0.342707	-0.3386	-0.327005	-0.278022	-0.268624	-0.233046	-0.222366	-0.168596
1.628	-0.632182	-0.407682	-0.336302	-0.328666	-0.340843	-0.338319	-0.32621	-0.27718	-0.267495	-0.23316	-0.223438	-0.167784
1.629	-0.626892	-0.405897	-0.335985	-0.329772	-0.338715	-0.338107	-0.324599	-0.277133	-0.266683	-0.233503	-0.224348	-0.167139
1.63	-0.621473	-0.404129	-0.33571	-0.330972	-0.336456	-0.337556	-0.322442	-0.277583	-0.266025	-0.233953	-0.22519	-0.166654
1.631	-0.616263	-0.402475	-0.335277	-0.332027	-0.334181	-0.336467	-0.320119	-0.278279	-0.265499	-0.234491	-0.225893	-0.166302
1.632	-0.611472	-0.400887	-0.334594	-0.332706	-0.332014	-0.335067	-0.31792	-0.279046	-0.265312	-0.235168	-0.226223	-0.16609
1.633	-0.60718	-0.399301	-0.333612	-0.332945	-0.33009	-0.333611	-0.315887	-0.279779	-0.26557	-0.236009	-0.226129	-0.16605
1.634	-0.603401	-0.397763	-0.332293	-0.332796	-0.328455	-0.33209	-0.313887	-0.280414	-0.26612	-0.236989	-0.225712	-0.166056
1.635	-0.600038	-0.396414	-0.330714	-0.332274	-0.326966	-0.330312	-0.311903	-0.280853	-0.266703	-0.238052	-0.22499	-0.165896
1.636	-0.596825	-0.39539	-0.329024	-0.3314	-0.325412	-0.328061	-0.310009	-0.280971	-0.267144	-0.2391	-0.223951	-0.16555
1.637	-0.593498	-0.394667	-0.327245	-0.330263	-0.323703	-0.325262	-0.308251	-0.280649	-0.267341	-0.24003	-0.222736	-0.165243
1.638	-0.58995	-0.394114	-0.325372	-0.328952	-0.32196	-0.322094	-0.306688	-0.279839	-0.267212	-0.240763	-0.221565	-0.16522
1.639	-0.586142	-0.393679	-0.323534	-0.327601	-0.320414	-0.318854	-0.305422	-0.278639	-0.266779	-0.241194	-0.220471	-0.165571
1.64	-0.582098	-0.393305	-0.321952	-0.32632	-0.319169	-0.315808	-0.304524	-0.277241	-0.266013	-0.241186	-0.219338	-0.166218
1.641	-0.577963	-0.392853	-0.320817	-0.32501	-0.318203	-0.313154	-0.303962	-0.275875	-0.26461	-0.240698	-0.218159	-0.166982
1.642	-0.57391	-0.392198	-0.320129	-0.323446	-0.317463	-0.311028	-0.303569	-0.274698	-0.262253	-0.239769	-0.216996	-0.167679
1.643	-0.570015	-0.391192	-0.319759	-0.321526	-0.31686	-0.309515	-0.303163	-0.273632	-0.25901	-0.238392	-0.215899	-0.168188
1.644	-0.56627	-0.389597	-0.319676	-0.319398	-0.316349	-0.308701	-0.302665	-0.272468	-0.255393	-0.236666	-0.214976	-0.168421
1.645	-0.562695	-0.387263	-0.31989	-0.317303	-0.315927	-0.308647	-0.302139	-0.271195	-0.252107	-0.234894	-0.214313	-0.168354
1.646	-0.55944	-0.384289	-0.320327	-0.315207	-0.315482	-0.309192	-0.301675	-0.27008	-0.249653	-0.233343	-0.213765	-0.168089
1.647	-0.556739	-0.380951	-0.320862	-0.312893	-0.314879	-0.309906	-0.301182	-0.269358	-0.248225	-0.232126	-0.21301	-0.16774
1.648	-0.554728	-0.377524	-0.321337	-0.310365	-0.314126	-0.310391	-0.300467	-0.268977	-0.247813	-0.231299	-0.21199	-0.167326
1.649	-0.553365	-0.374243	-0.321576	-0.307769	-0.313281	-0.310527	-0.299531	-0.268776	-0.248258	-0.230893	-0.211094	-0.166879
1.65	-0.552501	-0.37129	-0.321393	-0.305189	-0.31237	-0.310476	-0.298651	-0.268734	-0.249314	-0.230873	-0.210661	-0.16646
1.651	-0.551981	-0.368752	-0.320607	-0.302778	-0.311427	-0.310464	-0.298096	-0.2689	-0.250649	-0.231135	-0.210513	-0.166044
1.652	-0.551693	-0.366693	-0.319218	-0.300759	-0.310507	-0.310471	-0.297902	-0.26923	-0.251939	-0.231565	-0.210312	-0.165621
1.653	-0.551574	-0.365179	-0.317437	-0.299229	-0.30963	-0.310323	-0.298017	-0.269515	-0.253066	-0.23213	-0.210026	-0.165269
1.654	-0.551577	-0.364265	-0.315499	-0.298206	-0.308846	-0.309961	-0.298353	-0.269471	-0.254121	-0.232825	-0.209771	-0.16501
1.655	-0.551671	-0.363969	-0.31353	-0.297787	-0.308296	-0.309481	-0.298718	-0.268931	-0.255155	-0.23352	-0.20951	-0.164735
1.656	-0.551866	-0.364187	-0.311545	-0.298083	-0.308107	-0.30898	-0.298938	-0.267935	-0.256066	-0.233961	-0.209134	-0.164358
1.657	-0.552241	-0.364745	-0.309552	-0.299055	-0.308302	-0.308466	-0.29896	-0.266586	-0.256823	-0.233857	-0.208655	-0.163873
1.658	-0.552906	-0.365444	-0.307609	-0.300484	-0.30879	-0.307964	-0.298793	-0.264956	-0.257584	-0.232997	-0.208235	-0.163222
1.659	-0.553879	-0.36608	-0.305727	-0.302039	-0.30936	-0.307554	-0.298504	-0.26315	-0.25845	-0.2315	-0.208094	-0.16239
1.66	-0.555127	-0.366556	-0.303906	-0.303352	-0.309787	-0.307291	-0.298167	-0.261359	-0.259369	-0.229804	-0.20829	-0.161534
1.661	-0.556712	-0.366836	-0.302217	-0.304023	-0.309935	-0.307128	-0.297716	-0.259875	-0.260356	-0.228216	-0.208709	-0.160686
1.662	-0.558709	-0.366827	-0.300665	-0.303727	-0.309744	-0.307005	-0.29702	-0.258873	-0.261416	-0.226706	-0.209248	-0.159632
1.663	-0.561049	-0.366457	-0.299162	-0.302441	-0.309294	-0.307034	-0.296146	-0.258216	-0.262307	-0.225292	-0.209803	-0.158332
1.664	-0.563526	-0.365767	-0.297703	-0.300343	-0.308763	-0.30738	-0.295281	-0.257777	-0.26271	-0.224219	-0.210201	-0.157057
1.665	-0.565885	-0.364873	-0.296449	-0.297472	-0.308193	-0.307958	-0.294466	-0.257703	-0.262571	-0.223639	-0.210311	-0.156079
1.666	-0.567918	-0.363914	-0.295585	-0.293797	-0.307557	-0.308574	-0.293629	-0.25809	-0.262108	-0.223427	-0.21022	-0.155484
1.667	-0.569513	-0.363037	-0.295113	-0.289584	-0.306862	-0.309254	-0.292808	-0.258782	-0.261516	-0.223321	-0.21016	-0.155197
1.668	-0.570624	-0.362337	-0.294888	-0.285338	-0.306042	-0.310105	-0.292236	-0.259635	-0.26072	-0.223181	-0.210151	-0.155159
1.669	-0.571192	-0.36181	-0.294781	-0.281428	-0.304974	-0.310979	-0.292132	-0.260637	-0.259383	-0.223129	-0.209899	-0.155341
1.67	-0.571146	-0.361401	-0.294698	-0.278039	-0.303597	-0.311508	-0.292399	-0.261704	-0.257278	-0.223317	-0.209122	-0.155607
1.671	-0.570534	-0.361002	-0.29459	-0.275273	-0.301995	-0.311463	-0.292739	-0.262563	-0.254677	-0.223718	-0.207808	-0.155711
1.672	-0.569542	-0.36048	-0.294442	-0.273098	-0.300422	-0.310903	-0.292986	-0.262824	-0.252186	-0.224101	-0.206227	-0.15542
1.673	-0.568283	-0.359861	-0.294215	-0.271332	-0.299143	-0.309938	-0.293202	-0.262131	-0.250184	-0.224103	-0.204705	-0.154662
1.674	-0.566703	-0.359345	-0.293853	-0.269837	-0.298285	-0.308541	-0.293456	-0.260426	-0.248501	-0.223481	-0.2033	-0.15364
1.675	-0.564804	-0.359032	-0.293307	-0.268601	-0.29779	-0.30666	-0.293513	-0.258034	-0.246796	-0.222321	-0.202052	-0.152693
1.676	-0.562741	-0.358823	-0.292628	-0.267485	-0.297471	-0.304447	-0.292965	-0.255453	-0.24508	-0.220887	-0.2013	-0.151891
1.677	-0.560652	-0.3586	-0.291936	-0.266194	-0.297152	-0.30225	-0.291616	-0.253016	-0.243549	-0.219259	-0.201355	-0.151006
1.678	-0.558606	-0.358252	-0.29122	-0.264652	-0.296805	-0.30035	-0.289638	-0.250703	-0.242118	-0.217376	-0.202256	-0.149996
1.679	-0.556667	-0.357613	-0.290315	-0.263141	-0.296432	-0.298701	-0.287412	-0.248376	-0.240425	-0.215352	-0.203887	-0.149084
1.68	-0.554845	-0.356563	-0.289117	-0.261952	-0.295842	-0.297028	-0.285136	-0.246116	-0.238192	-0.213443	-0.20614	-0.148403
1.681	-0.553023	-0.355065	-0.287708	-0.26116	-0.29477	-0.295184	-0.282832	-0.244205	-0.235507	-0.211796	-0.208879	-0.147818
1.682	-0.551041	-0.353082	-0.286256	-0.260723	-0.293195	-0.293261	-0.280649	-0.242843	-0.232755	-0.210406	-0.211812	-0.147074
1.683	-0.548771	-0.350702	-0.284883	-0.260552	-0.291375	-0.291443	-0.278772	-0.242033	-0.230237	-0.209326	-0.214599	-0.146093
1.684	-0.546104	-0.348255	-0.283625	-0.26053	-0.289564	-0.289848	-0.277228	-0.241783	-0.228054	-0.208804	-0.216943	-0.145016
1.685	-0.543014	-0.346071	-0.282429	-0.26053	-0.287816	-0.288475	-0.275925	-0.242142	-0.226384	-0.208967	-0.218467	-0.14398
1.686	-0.539573	-0.344278	-0.28121	-0.26041	-0.286106	-0.287292	-0.274793	-0.242935	-0.225471	-0.209511	-0.218859	-0.142919
1.687	-0.535844	-0.342859	-0.279985	-0.260052	-0.28452	-0.28631	-0.273941	-0.243746	-0.225281	-0.210069	-0.218117	-0.141617
1.688	-0.531851	-0.341704	-0.278891	-0.259475	-0.283218	-0.285487	-0.273568	-0.244284	-0.225516	-0.210616	-0.216394	-0.139999
1.689	-0.527654	-0.340724	-0.278069	-0.258887	-0.282214	-0.284561	-0.273645	-0.24455	-0.225938	-0.211289	-0.213787	-0.13821
1.69	-0.523385	-0.339859	-0.277531	-0.258625	-0.281356	-0.283147	-0.273791	-0.244595	-0.226389	-0.212038	-0.210505	-0.136367
1.691	-0.5192	-0.338987	-0.277198	-0.258996	-0.280555	-0.281147	-0.273668	-0.244321	-0.226713	-0.212721	-0.206952	-0.134466
1.692	-0.515231	-0.338009	-0.277036	-0.260058	-0.279827	-0.278856	-0.273295	-0.243633	-0.22681	-0.213266	-0.203528	-0.132578
1.693	-0.511574	-0.336959	-0.276969	-0.261551	-0.279169	-0.276651	-0.272775	-0.242599	-0.226621	-0.213597	-0.20048	-0.130983
1.694	-0.508289	-0.335927	-0.276812	-0.263078	-0.278543	-0.274756	-0.272045	-0.241371	-0.226133	-0.21362	-0.197894	-0.129959
1.695	-0.505369	-0.33494	-0.276418	-0.264287	-0.27793	-0.273253	-0.271011	-0.240092	-0.225358	-0.213328	-0.195767	-0.129566
1.696	-0.502791	-0.33396	-0.275725	-0.265003	-0.277327	-0.272235	-0.269749	-0.238874	-0.224278	-0.212771	-0.194082	-0.129691
1.697	-0.50059	-0.332941	-0.27474	-0.265346	-0.276717	-0.271766	-0.268459	-0.237732	-0.222903	-0.211982	-0.192789	-0.130141
1.698	-0.498813	-0.331845	-0.273577	-0.265563	-0.276061	-0.271713	-0.267239	-0.236616	-0.221277	-0.211101	-0.191758	-0.130697
1.699	-0.497523	-0.330675	-0.272416	-0.265686	-0.275374	-0.271823	-0.266028	-0.23556	-0.219479	-0.210361	-0.190857	-0.131303
1.7	-0.496782	-0.329502	-0.271373	-0.265494	-0.274789	-0.271966	-0.264832	-0.23455	-0.217632	-0.209811	-0.18999	-0.132032
1.701	-0.496601	-0.328412	-0.270482	-0.2648	-0.2744	-0.272178	-0.263771	-0.233425	-0.215814	-0.209286	-0.188984	-0.132831
1.702	-0.496944	-0.327394	-0.269737	-0.26359	-0.274127	-0.272463	-0.262921	-0.232055	-0.213981	-0.208608	-0.187617	-0.133578
1.703	-0.497727	-0.326333	-0.269127	-0.261914	-0.273822	-0.272641	-0.262329	-0.230446	-0.21213	-0.207693	-0.185841	-0.134263
1.704	-0.49884	-0.325144	-0.268678	-0.259828	-0.273387	-0.27248	-0.262006	-0.228709	-0.210452	-0.206581	-0.183925	-0.134849
1.705	-0.500212	-0.323838	-0.268408	-0.257437	-0.27281	-0.27189	-0.261848	-0.226978	-0.209054	-0.20543	-0.182226	-0.135181
1.706	-0.50181	-0.322484	-0.268282	-0.255001	-0.272138	-0.270962	-0.261726	-0.22535	-0.207775	-0.204352	-0.180785	-0.135186
1.707	-0.503582	-0.321143	-0.268254	-0.252913	-0.271433	-0.269829	-0.261482	-0.223984	-0.206519	-0.203278	-0.179283	-0.13498
1.708	-0.505442	-0.319828	-0.268259	-0.251401	-0.270759	-0.268491	-0.260887	-0.223068	-0.205449	-0.202085	-0.177431	-0.134742
1.709	-0.507257	-0.318577	-0.268203	-0.250452	-0.270135	-0.266935	-0.25975	-0.22262	-0.204838	-0.200891	-0.175243	-0.134556
1.71	-0.508839	-0.317494	-0.268041	-0.250016	-0.269537	-0.265344	-0.258082	-0.222507	-0.204868	-0.199947	-0.172863	-0.134392
1.711	-0.51003	-0.31665	-0.267792	-0.250041	-0.268937	-0.26395	-0.256102	-0.222642	-0.205494	-0.199295	-0.170367	-0.134193
1.712	-0.510821	-0.316034	-0.267487	-0.250429	-0.268267	-0.2629	-0.254101	-0.223033	-0.206462	-0.198861	-0.167821	-0.133914
1.713	-0.511389	-0.315643	-0.267134	-0.251074	-0.267382	-0.262284	-0.252292	-0.223651	-0.207446	-0.198644	-0.165331	-0.133479
1.714	-0.511999	-0.315534	-0.266748	-0.251898	-0.266154	-0.262089	-0.250748	-0.224414	-0.208256	-0.198587	-0.16299	-0.13282
1.715	-0.512809	-0.315729	-0.266361	-0.252823	-0.26462	-0.262197	-0.249491	-0.225266	-0.208879	-0.198639	-0.160825	-0.132
1.716	-0.513772	-0.316167	-0.265998	-0.253706	-0.262972	-0.262531	-0.248542	-0.22607	-0.209379	-0.198802	-0.158827	-0.131091
1.717	-0.514717	-0.316781	-0.265647	-0.254445	-0.26138	-0.263001	-0.24789	-0.226648	-0.209825	-0.198997	-0.157024	-0.130002
1.718	-0.515514	-0.317497	-0.265294	-0.255032	-0.259925	-0.263366	-0.247532	-0.226951	-0.21027	-0.199129	-0.15546	-0.128648
1.719	-0.516178	-0.31822	-0.264957	-0.255437	-0.258608	-0.263284	-0.247493	-0.227024	-0.210781	-0.199248	-0.154196	-0.127178
1.72	-0.516664	-0.318806	-0.264654	-0.255519	-0.257302	-0.262423	-0.247716	-0.226944	-0.211342	-0.19951	-0.153302	-0.12583
1.721	-0.516737	-0.319024	-0.264397	-0.25511	-0.255898	-0.260677	-0.248009	-0.226764	-0.211788	-0.20002	-0.15284	-0.12467
1.722	-0.516146	-0.318719	-0.264192	-0.254188	-0.254551	-0.258293	-0.24825	-0.226448	-0.211947	-0.200736	-0.152804	-0.123643
1.723	-0.514828	-0.317998	-0.263927	-0.252881	-0.253512	-0.255651	-0.24848	-0.225942	-0.211761	-0.201463	-0.152991	-0.122766
1.724	-0.512852	-0.317068	-0.263432	-0.251193	-0.252841	-0.252927	-0.248675	-0.225298	-0.211215	-0.201984	-0.153145	-0.122172
1.725	-0.51027	-0.31606	-0.262614	-0.249016	-0.252442	-0.250153	-0.248664	-0.224619	-0.210309	-0.20219	-0.153219	-0.121988
1.726	-0.507183	-0.315062	-0.261479	-0.246404	-0.252207	-0.24753	-0.248295	-0.22396	-0.209121	-0.20202	-0.153298	-0.12208
1.727	-0.503764	-0.31418	-0.260115	-0.243565	-0.252025	-0.245366	-0.2476	-0.223343	-0.207817	-0.201392	-0.153382	-0.122146
1.728	-0.500052	-0.313533	-0.258681	-0.240663	-0.251806	-0.243827	-0.24673	-0.222793	-0.206604	-0.200279	-0.153289	-0.122137
1.729	-0.495871	-0.31317	-0.257402	-0.237768	-0.251502	-0.242871	-0.245705	-0.222355	-0.205598	-0.198842	-0.152796	-0.122321
1.73	-0.491049	-0.313023	-0.256517	-0.234886	-0.251053	-0.242284	-0.244345	-0.222069	-0.204708	-0.19735	-0.151877	-0.122909
1.731	-0.485635	-0.312975	-0.256175	-0.232104	-0.250455	-0.241867	-0.242575	-0.221852	-0.203717	-0.195988	-0.150812	-0.123783
1.732	-0.479892	-0.312896	-0.256361	-0.229656	-0.249842	-0.241587	-0.240676	-0.221508	-0.202517	-0.194858	-0.150063	-0.12468
1.733	-0.474137	-0.312656	-0.25694	-0.227711	-0.249288	-0.241452	-0.239044	-0.220881	-0.201177	-0.194115	-0.149996	-0.125472
1.734	-0.46861	-0.312166	-0.257707	-0.226236	-0.248714	-0.241354	-0.237811	-0.220021	-0.199741	-0.193907	-0.150563	-0.126204
1.735	-0.463404	-0.311437	-0.258418	-0.225113	-0.247955	-0.241146	-0.236863	-0.219177	-0.198211	-0.194109	-0.151349	-0.126945
1.736	-0.458469	-0.310582	-0.258923	-0.224288	-0.246856	-0.240795	-0.236118	-0.218567	-0.196724	-0.194373	-0.152043	-0.127574
1.737	-0.453642	-0.309747	-0.259225	-0.223824	-0.245459	-0.240275	-0.235605	-0.218208	-0.195495	-0.194521	-0.152677	-0.127764
1.738	-0.448725	-0.309094	-0.259377	-0.223801	-0.243967	-0.239532	-0.235408	-0.217965	-0.194648	-0.194641	-0.153328	-0.127228
1.739	-0.443698	-0.308655	-0.259398	-0.224231	-0.242471	-0.238667	-0.235612	-0.217749	-0.194191	-0.19477	-0.153808	-0.125964
1.74	-0.438763	-0.308233	-0.259242	-0.225059	-0.241006	-0.23788	-0.236102	-0.217529	-0.194057	-0.194704	-0.153837	-0.124251
1.741	-0.4341	-0.307646	-0.258848	-0.226195	-0.239764	-0.23727	-0.23661	-0.217256	-0.194173	-0.19426	-0.153374	-0.122406
1.742	-0.429669	-0.306859	-0.258138	-0.227526	-0.238931	-0.236801	-0.237033	-0.216924	-0.194523	-0.193495	-0.152576	-0.120576
1.743	-0.42542	-0.305842	-0.257004	-0.2288	-0.23846	-0.23641	-0.237441	-0.216579	-0.195115	-0.192557	-0.151658	-0.118781
1.744	-0.421592	-0.304546	-0.255378	-0.229681	-0.238099	-0.236071	-0.237834	-0.216176	-0.195891	-0.19161	-0.150883	-0.117051
1.745	-0.418549	-0.302979	-0.25331	-0.230014	-0.237557	-0.235688	-0.238023	-0.215611	-0.196704	-0.190869	-0.150494	-0.115412
1.746	-0.416388	-0.301174	-0.250971	-0.22984	-0.236637	-0.235183	-0.237792	-0.214948	-0.19736	-0.190523	-0.150679	-0.113895
1.747	-0.414959	-0.299142	-0.248488	-0.229204	-0.23525	-0.234732	-0.237171	-0.214465	-0.197666	-0.1906	-0.151474	-0.112591
1.748	-0.414132	-0.296998	-0.245855	-0.22813	-0.233411	-0.234593	-0.236366	-0.214344	-0.197509	-0.190967	-0.152594	-0.111632
1.749	-0.413929	-0.294954	-0.243107	-0.226718	-0.23136	-0.234685	-0.235456	-0.214513	-0.196969	-0.191566	-0.153626	-0.111162
1.75	-0.41448	-0.293194	-0.240418	-0.225188	-0.229527	-0.234764	-0.234393	-0.214928	-0.196208	-0.192531	-0.154318	-0.111274
1.751	-0.415731	-0.29187	-0.237909	-0.22369	-0.228212	-0.234834	-0.233215	-0.215659	-0.195244	-0.193948	-0.154546	-0.111937
1.752	-0.417202	-0.290967	-0.235558	-0.222228	-0.227383	-0.235003	-0.232062	-0.21655	-0.194014	-0.195615	-0.154196	-0.112991
1.753	-0.41833	-0.290295	-0.233389	-0.221002	-0.226938	-0.235217	-0.231087	-0.217115	-0.192673	-0.197148	-0.15323	-0.11419
1.754	-0.419057	-0.289756	-0.231573	-0.220492	-0.226887	-0.235337	-0.230457	-0.216942	-0.191576	-0.198285	-0.151722	-0.115298
1.755	-0.419758	-0.289413	-0.230222	-0.220965	-0.227175	-0.235269	-0.230301	-0.216077	-0.190912	-0.199034	-0.149849	-0.116229
1.756	-0.420832	-0.289289	-0.229233	-0.222275	-0.227706	-0.235025	-0.230583	-0.214887	-0.190601	-0.199436	-0.147998	-0.117026
1.757	-0.422591	-0.289281	-0.22847	-0.224249	-0.228523	-0.234638	-0.231068	-0.213579	-0.190509	-0.199354	-0.146686	-0.117623
1.758	-0.425218	-0.289249	-0.227958	-0.226835	-0.229751	-0.234123	-0.231544	-0.212092	-0.190564	-0.198624	-0.146218	-0.117834
1.759	-0.428633	-0.289062	-0.227727	-0.229764	-0.231433	-0.233586	-0.232053	-0.210463	-0.190712	-0.197247	-0.146494	-0.117668
1.76	-0.432516	-0.288634	-0.227648	-0.232475	-0.233434	-0.233205	-0.232718	-0.209025	-0.190821	-0.19538	-0.147306	-0.117346
1.761	-0.436474	-0.287907	-0.227539	-0.234527	-0.235461	-0.233069	-0.233445	-0.208152	-0.190705	-0.193206	-0.148718	-0.116962
1.762	-0.440167	-0.286824	-0.227353	-0.235868	-0.237234	-0.233175	-0.234047	-0.207981	-0.190342	-0.190909	-0.150795	-0.116444
1.763	-0.443344	-0.285394	-0.227139	-0.236634	-0.238625	-0.233538	-0.234522	-0.208447	-0.1899	-0.188739	-0.153152	-0.115831
1.764	-0.445891	-0.283787	-0.226884	-0.236922	-0.239574	-0.234168	-0.234946	-0.209491	-0.189481	-0.186949	-0.155316	-0.115367
1.765	-0.447785	-0.282228	-0.226505	-0.236823	-0.239971	-0.234997	-0.235286	-0.211122	-0.189038	-0.185685	-0.157268	-0.115239
1.766	-0.44894	-0.280807	-0.225996	-0.236533	-0.239809	-0.235891	-0.235543	-0.213177	-0.188531	-0.184963	-0.159149	-0.115333
1.767	-0.449313	-0.279606	-0.225469	-0.236248	-0.239256	-0.236732	-0.235847	-0.21526	-0.188033	-0.184684	-0.160741	-0.11537
1.768	-0.449199	-0.278788	-0.225109	-0.235994	-0.238527	-0.237454	-0.236216	-0.21706	-0.18764	-0.184719	-0.161659	-0.11524
1.769	-0.449059	-0.278399	-0.225031	-0.235582	-0.237851	-0.238008	-0.236442	-0.218469	-0.187311	-0.185035	-0.161771	-0.115121
1.77	-0.449143	-0.278382	-0.225246	-0.234718	-0.237422	-0.238377	-0.236301	-0.219433	-0.186886	-0.185613	-0.161146	-0.115227
1.771	-0.449547	-0.278734	-0.225764	-0.233217	-0.237274	-0.238616	-0.235755	-0.219882	-0.186265	-0.186332	-0.159823	-0.115596
1.772	-0.45035	-0.27953	-0.226562	-0.231108	-0.237351	-0.238801	-0.23487	-0.219692	-0.18554	-0.187028	-0.157857	-0.116106
1.773	-0.451543	-0.280826	-0.227494	-0.228531	-0.237594	-0.238955	-0.233694	-0.21873	-0.184901	-0.187579	-0.155591	-0.116585
1.774	-0.453052	-0.282484	-0.228371	-0.225664	-0.237934	-0.239044	-0.232281	-0.217001	-0.184412	-0.187905	-0.153516	-0.116975
1.775	-0.454896	-0.284186	-0.229124	-0.222719	-0.238349	-0.239056	-0.230689	-0.214593	-0.184031	-0.187976	-0.151769	-0.117371
1.776	-0.457132	-0.285676	-0.229767	-0.219857	-0.238892	-0.239026	-0.229015	-0.211666	-0.183809	-0.187766	-0.150138	-0.117867
1.777	-0.459709	-0.286859	-0.230191	-0.217153	-0.239545	-0.238968	-0.227452	-0.208609	-0.183858	-0.187184	-0.148544	-0.118511
1.778	-0.462482	-0.287704	-0.230269	-0.214637	-0.24017	-0.238914	-0.226294	-0.205891	-0.184165	-0.186147	-0.147245	-0.119316
1.779	-0.465269	-0.288189	-0.230001	-0.21235	-0.240644	-0.238863	-0.225744	-0.203698	-0.184525	-0.184707	-0.146485	-0.120278
1.78	-0.467807	-0.288323	-0.229389	-0.21037	-0.240884	-0.238743	-0.225752	-0.201976	-0.184667	-0.183024	-0.146179	-0.121448
1.781	-0.469787	-0.288164	-0.228418	-0.208749	-0.240825	-0.238568	-0.226193	-0.20082	-0.184486	-0.181291	-0.146073	-0.122874
1.782	-0.470999	-0.287817	-0.227188	-0.207387	-0.240476	-0.238477	-0.226992	-0.200493	-0.184115	-0.179688	-0.146025	-0.124486
1.783	-0.471363	-0.28729	-0.225886	-0.206067	-0.239939	-0.238546	-0.227993	-0.201044	-0.183696	-0.178354	-0.145995	-0.126054
1.784	-0.470877	-0.286457	-0.224668	-0.204783	-0.239316	-0.238751	-0.228973	-0.202217	-0.183324	-0.177363	-0.145951	-0.127249
1.785	-0.469589	-0.285286	-0.223601	-0.203771	-0.238687	-0.238988	-0.22979	-0.203723	-0.183122	-0.176794	-0.145868	-0.127828
1.786	-0.467566	-0.283947	-0.222701	-0.203101	-0.238059	-0.239016	-0.23033	-0.205349	-0.183072	-0.176707	-0.14574	-0.127771
1.787	-0.464867	-0.282632	-0.222028	-0.202591	-0.237273	-0.238566	-0.230448	-0.206888	-0.183014	-0.176989	-0.145509	-0.127119
1.788	-0.461531	-0.281423	-0.221677	-0.20216	-0.236146	-0.237591	-0.230163	-0.208058	-0.182952	-0.17749	-0.145028	-0.125824
1.789	-0.457656	-0.28037	-0.221599	-0.201894	-0.234636	-0.236275	-0.229689	-0.208595	-0.18304	-0.178209	-0.144109	-0.123884
1.79	-0.45347	-0.279535	-0.221616	-0.201811	-0.232792	-0.234819	-0.229204	-0.208472	-0.183275	-0.179104	-0.142691	-0.121494
1.791	-0.449137	-0.278935	-0.221634	-0.201813	-0.230661	-0.233214	-0.228591	-0.207826	-0.183462	-0.179859	-0.14096	-0.118876
1.792	-0.444608	-0.278508	-0.221677	-0.201851	-0.228341	-0.231349	-0.227552	-0.206714	-0.183445	-0.179996	-0.139236	-0.116045
1.793	-0.439794	-0.278133	-0.221701	-0.20202	-0.226097	-0.229349	-0.226021	-0.205161	-0.183305	-0.179335	-0.137804	-0.112977
1.794	-0.434729	-0.27764	-0.221478	-0.202399	-0.224163	-0.227555	-0.224229	-0.203375	-0.183283	-0.178219	-0.136806	-0.109918
1.795	-0.429559	-0.276873	-0.220756	-0.202872	-0.222469	-0.226126	-0.222345	-0.201771	-0.183401	-0.17717	-0.136198	-0.107257
1.796	-0.42452	-0.275762	-0.219481	-0.203243	-0.220774	-0.224888	-0.220305	-0.200649	-0.183342	-0.17641	-0.135752	-0.10516
1.797	-0.419975	-0.274319	-0.217782	-0.20349	-0.219034	-0.223605	-0.218095	-0.199965	-0.18286	-0.175855	-0.135263	-0.103534
1.798	-0.416333	-0.272619	-0.215846	-0.203744	-0.217484	-0.222266	-0.215898	-0.199585	-0.182009	-0.175453	-0.13486	-0.102284
1.799	-0.41378	-0.270826	-0.213868	-0.204052	-0.216355	-0.221038	-0.213927	-0.199509	-0.180878	-0.175203	-0.13476	-0.10141
1.8	-0.412249	-0.269068	-0.212073	-0.204294	-0.215593	-0.219987	-0.212322	-0.199716	-0.179367	-0.175032	-0.134797	-0.100905
1.801	-0.411615	-0.267335	-0.21065	-0.204239	-0.215	-0.219018	-0.211134	-0.200034	-0.177446	-0.174879	-0.134667	-0.100773
1.802	-0.411819	-0.265697	-0.209644	-0.203652	-0.214558	-0.21809	-0.210292	-0.200168	-0.175413	-0.174666	-0.134353	-0.101006
1.803	-0.412832	-0.264388	-0.208941	-0.202461	-0.214428	-0.217291	-0.209704	-0.199861	-0.173648	-0.17435	-0.133954	-0.10143
1.804	-0.414602	-0.263533	-0.208395	-0.200777	-0.214679	-0.216674	-0.209432	-0.199084	-0.172265	-0.174038	-0.133464	-0.10182
1.805	-0.417103	-0.263001	-0.207918	-0.198751	-0.215127	-0.216128	-0.209562	-0.197984	-0.171136	-0.173811	-0.132888	-0.102098
1.806	-0.420227	-0.262582	-0.207521	-0.196569	-0.215532	-0.215525	-0.210003	-0.196692	-0.170126	-0.173565	-0.132285	-0.102179
1.807	-0.423709	-0.262136	-0.20732	-0.194551	-0.215806	-0.214958	-0.210556	-0.195276	-0.169258	-0.173147	-0.131648	-0.101916
1.808	-0.427311	-0.261565	-0.20739	-0.193072	-0.215895	-0.214653	-0.211017	-0.193859	-0.168617	-0.172571	-0.130991	-0.101424
1.809	-0.430874	-0.260814	-0.207652	-0.192327	-0.215689	-0.214664	-0.211247	-0.19263	-0.16818	-0.172004	-0.130486	-0.101095
1.81	-0.434203	-0.259873	-0.208045	-0.192315	-0.215179	-0.214825	-0.211175	-0.191713	-0.167886	-0.17151	-0.1303	-0.101145
1.811	-0.437059	-0.258771	-0.208563	-0.192946	-0.214498	-0.215001	-0.210731	-0.191104	-0.167683	-0.171033	-0.130439	-0.101447
1.812	-0.439321	-0.257571	-0.209086	-0.194069	-0.213813	-0.215299	-0.209926	-0.190685	-0.167481	-0.17057	-0.130836	-0.101759
1.813	-0.441044	-0.256363	-0.209471	-0.195454	-0.213257	-0.215894	-0.208951	-0.190268	-0.167189	-0.17011	-0.131422	-0.101941
1.814	-0.442242	-0.255312	-0.209663	-0.196849	-0.212866	-0.216731	-0.208017	-0.189649	-0.166675	-0.169602	-0.132138	-0.102025
1.815	-0.442862	-0.254593	-0.209583	-0.198032	-0.212579	-0.217609	-0.207251	-0.188737	-0.1658	-0.16907	-0.132916	-0.102127
1.816	-0.443002	-0.25416	-0.209177	-0.198884	-0.212306	-0.218421	-0.206724	-0.187673	-0.164565	-0.168634	-0.133661	-0.102306
1.817	-0.442801	-0.253836	-0.208547	-0.199428	-0.211975	-0.219084	-0.206432	-0.186696	-0.163145	-0.168369	-0.134268	-0.102459
1.818	-0.442234	-0.253601	-0.207862	-0.199688	-0.211581	-0.219449	-0.206344	-0.185846	-0.161794	-0.16818	-0.134667	-0.102402
1.819	-0.441281	-0.253541	-0.207231	-0.19963	-0.211241	-0.219403	-0.206435	-0.184858	-0.160735	-0.167934	-0.134874	-0.102001
1.82	-0.440145	-0.253682	-0.206675	-0.199267	-0.21108	-0.218912	-0.206638	-0.18341	-0.160136	-0.167543	-0.134909	-0.10124
1.821	-0.439105	-0.254021	-0.206169	-0.198705	-0.211053	-0.217954	-0.206885	-0.181454	-0.160074	-0.166989	-0.1347	-0.100247
1.822	-0.438272	-0.25457	-0.205747	-0.197992	-0.211076	-0.216558	-0.207159	-0.179195	-0.160496	-0.166417	-0.134146	-0.0991222
1.823	-0.437588	-0.255259	-0.205494	-0.197071	-0.211137	-0.214935	-0.207459	-0.176923	-0.161283	-0.166004	-0.133294	-0.0978146
1.824	-0.436943	-0.255936	-0.205429	-0.196007	-0.211221	-0.213332	-0.207802	-0.174942	-0.162262	-0.16576	-0.132356	-0.0963599
1.825	-0.436235	-0.256497	-0.205516	-0.195095	-0.211352	-0.211806	-0.208127	-0.17347	-0.163248	-0.165558	-0.13147	-0.0950262
1.826	-0.435412	-0.256877	-0.20569	-0.194576	-0.211545	-0.210264	-0.208231	-0.172551	-0.164181	-0.165277	-0.13062	-0.0941037
1.827	-0.434492	-0.256979	-0.205817	-0.194379	-0.21174	-0.208783	-0.207955	-0.172144	-0.16506	-0.164826	-0.129856	-0.0936833
1.828	-0.433592	-0.256726	-0.205838	-0.194375	-0.211866	-0.207745	-0.207299	-0.172281	-0.165743	-0.164212	-0.129342	-0.0936518
1.829	-0.432813	-0.256146	-0.20587	-0.194626	-0.211812	-0.2075	-0.206402	-0.173012	-0.165966	-0.163634	-0.12924	-0.0939124
1.83	-0.432078	-0.255337	-0.206009	-0.195219	-0.211409	-0.208036	-0.205415	-0.174271	-0.165505	-0.163299	-0.129598	-0.0945451
1.831	-0.431195	-0.254365	-0.206198	-0.196076	-0.210534	-0.209038	-0.204414	-0.175911	-0.164309	-0.163214	-0.130322	-0.095598
1.832	-0.43001	-0.253288	-0.206299	-0.197075	-0.209171	-0.210152	-0.203431	-0.177725	-0.162539	-0.163276	-0.131227	-0.0968641
1.833	-0.428413	-0.252169	-0.206206	-0.198161	-0.207467	-0.211116	-0.202477	-0.179534	-0.160413	-0.163479	-0.13205	-0.0980904
1.834	-0.426238	-0.251085	-0.205963	-0.199211	-0.205609	-0.211797	-0.201576	-0.18128	-0.15809	-0.163892	-0.132589	-0.099215
1.835	-0.42326	-0.250132	-0.205683	-0.19999	-0.203635	-0.212152	-0.200775	-0.182874	-0.155774	-0.164412	-0.132891	-0.100237
1.836	-0.419367	-0.249298	-0.20537	-0.200347	-0.201611	-0.212143	-0.200035	-0.184074	-0.153721	-0.164792	-0.133134	-0.101061
1.837	-0.414664	-0.248438	-0.204957	-0.200312	-0.199822	-0.211742	-0.199294	-0.184708	-0.152139	-0.164958	-0.133262	-0.101556
1.838	-0.409452	-0.247565	-0.204381	-0.199978	-0.198537	-0.210937	-0.198636	-0.184885	-0.151199	-0.165033	-0.132916	-0.10167
1.839	-0.404153	-0.246952	-0.203583	-0.199401	-0.197793	-0.20972	-0.198183	-0.184828	-0.151012	-0.165176	-0.131945	-0.101459
1.84	-0.399143	-0.246753	-0.202578	-0.198643	-0.1975	-0.208122	-0.197898	-0.184604	-0.151517	-0.16544	-0.1307	-0.100991
1.841	-0.394616	-0.246798	-0.201504	-0.197789	-0.197566	-0.206302	-0.197653	-0.184139	-0.15248	-0.165731	-0.129615	-0.100265
1.842	-0.390576	-0.24685	-0.200527	-0.196907	-0.197931	-0.204566	-0.197384	-0.183463	-0.153622	-0.165981	-0.128742	-0.0993627
1.843	-0.386927	-0.246754	-0.199702	-0.196056	-0.198542	-0.203173	-0.197129	-0.182844	-0.154856	-0.166178	-0.127859	-0.0985536
1.844	-0.383632	-0.246384	-0.199002	-0.195296	-0.199317	-0.202084	-0.196994	-0.182562	-0.156231	-0.16634	-0.126904	-0.0981105
1.845	-0.380674	-0.245628	-0.198387	-0.194618	-0.200112	-0.201071	-0.197051	-0.182648	-0.157653	-0.166518	-0.126107	-0.0980285
1.846	-0.377988	-0.244431	-0.197831	-0.193912	-0.200706	-0.200077	-0.197287	-0.182928	-0.158927	-0.166641	-0.12566	-0.0981141
1.847	-0.375605	-0.242818	-0.197309	-0.193063	-0.200804	-0.199185	-0.197678	-0.18329	-0.159917	-0.166429	-0.125496	-0.0982916
1.848	-0.373627	-0.240921	-0.196758	-0.192065	-0.200179	-0.198343	-0.198197	-0.183747	-0.160559	-0.165616	-0.125468	-0.0985263
1.849	-0.372067	-0.238915	-0.196122	-0.191001	-0.198902	-0.197447	-0.19873	-0.184226	-0.16081	-0.16429	-0.125593	-0.0986279
1.85	-0.370913	-0.236931	-0.195345	-0.189973	-0.19732	-0.196539	-0.199137	-0.184574	-0.160728	-0.162908	-0.125939	-0.0985069
1.851	-0.370255	-0.235127	-0.194313	-0.189099	-0.195702	-0.195781	-0.199331	-0.184707	-0.160558	-0.161841	-0.12632	-0.0983147
1.852	-0.370248	-0.233617	-0.193019	-0.188549	-0.194129	-0.195183	-0.199198	-0.184556	-0.16052	-0.161139	-0.12639	-0.0981239
1.853	-0.370939	-0.232347	-0.191622	-0.188536	-0.192779	-0.194543	-0.198554	-0.184096	-0.16059	-0.160867	-0.126009	-0.0978331
1.854	-0.372125	-0.231243	-0.190276	-0.189166	-0.191889	-0.193804	-0.197335	-0.18348	-0.16068	-0.161207	-0.12528	-0.0974384
1.855	-0.373496	-0.230269	-0.189018	-0.1903	-0.191522	-0.193198	-0.195782	-0.182998	-0.160857	-0.162179	-0.12439	-0.0971341
1.856	-0.374879	-0.229407	-0.187879	-0.191631	-0.191618	-0.192972	-0.194306	-0.182833	-0.161248	-0.163533	-0.123532	-0.0970778
1.857	-0.376265	-0.228706	-0.18697	-0.192897	-0.19214	-0.193186	-0.193139	-0.18283	-0.161805	-0.164803	-0.122776	-0.097214
1.858	-0.377741	-0.228234	-0.186393	-0.193938	-0.193069	-0.193734	-0.192321	-0.182708	-0.162371	-0.165604	-0.12207	-0.0974288
1.859	-0.379449	-0.228034	-0.186202	-0.194556	-0.194275	-0.194498	-0.191921	-0.182495	-0.163015	-0.165929	-0.121362	-0.0977345
1.86	-0.381563	-0.228117	-0.186329	-0.194536	-0.195518	-0.195343	-0.191915	-0.182435	-0.163991	-0.166034	-0.120663	-0.0982512
1.861	-0.384215	-0.228404	-0.186627	-0.193769	-0.196584	-0.196051	-0.192008	-0.182514	-0.165278	-0.166106	-0.120048	-0.0990137
1.862	-0.387431	-0.228796	-0.187027	-0.192329	-0.197388	-0.196528	-0.191839	-0.182353	-0.166514	-0.16609	-0.119625	-0.0998529
1.863	-0.391155	-0.229266	-0.187455	-0.190382	-0.197868	-0.196894	-0.191215	-0.181561	-0.167372	-0.165764	-0.119426	-0.10059
1.864	-0.395276	-0.229815	-0.187751	-0.188017	-0.197874	-0.197261	-0.190098	-0.18006	-0.167718	-0.164889	-0.119385	-0.101167
1.865	-0.399663	-0.230397	-0.187815	-0.185312	-0.197328	-0.197614	-0.188537	-0.178111	-0.167573	-0.163391	-0.119456	-0.101554
1.866	-0.404115	-0.230909	-0.187694	-0.182501	-0.196373	-0.197933	-0.186634	-0.176085	-0.167028	-0.161446	-0.119639	-0.101726
1.867	-0.408242	-0.231247	-0.187561	-0.179876	-0.195229	-0.198269	-0.184553	-0.174263	-0.16604	-0.15936	-0.119849	-0.101669
1.868	-0.411686	-0.231413	-0.187582	-0.17766	-0.194043	-0.198621	-0.182655	-0.172738	-0.164475	-0.157388	-0.119862	-0.101311
1.869	-0.414357	-0.231502	-0.187755	-0.176003	-0.192892	-0.198872	-0.181394	-0.171389	-0.162382	-0.155671	-0.119481	-0.100582
1.87	-0.416307	-0.231604	-0.188022	-0.174947	-0.191844	-0.198857	-0.180975	-0.170123	-0.16007	-0.154264	-0.118778	-0.0995706
1.871	-0.41754	-0.231799	-0.188401	-0.174395	-0.191008	-0.198447	-0.181308	-0.169018	-0.157859	-0.153102	-0.118043	-0.098389
1.872	-0.417952	-0.232054	-0.188858	-0.174229	-0.190499	-0.197664	-0.182231	-0.168077	-0.15597	-0.152073	-0.117529	-0.0969998
1.873	-0.417445	-0.232173	-0.189176	-0.174449	-0.190319	-0.196651	-0.183635	-0.16717	-0.154583	-0.151133	-0.117376	-0.0954688
1.874	-0.416061	-0.232046	-0.18916	-0.175083	-0.190358	-0.195533	-0.185443	-0.16625	-0.153809	-0.150262	-0.117645	-0.0940964
1.875	-0.413992	-0.231755	-0.18891	-0.176042	-0.190535	-0.194338	-0.187424	-0.165351	-0.153717	-0.149506	-0.118321	-0.0930453
1.876	-0.411477	-0.231426	-0.188685	-0.177102	-0.190837	-0.193091	-0.189171	-0.164534	-0.154266	-0.148893	-0.119333	-0.0921322
1.877	-0.408672	-0.231213	-0.188627	-0.178043	-0.191183	-0.19196	-0.190462	-0.163882	-0.155129	-0.14827	-0.12056	-0.0911032
1.878	-0.405694	-0.231301	-0.188712	-0.178785	-0.191414	-0.191083	-0.191351	-0.1635	-0.155789	-0.147513	-0.121826	-0.0899699
1.879	-0.402714	-0.231764	-0.188867	-0.179261	-0.191383	-0.190363	-0.191841	-0.163574	-0.155804	-0.146678	-0.123007	-0.089004
1.88	-0.399868	-0.232458	-0.189044	-0.179309	-0.190918	-0.189736	-0.19184	-0.164214	-0.154936	-0.145836	-0.124124	-0.0884385
1.881	-0.397197	-0.233116	-0.189151	-0.178814	-0.18989	-0.189376	-0.191416	-0.165217	-0.153198	-0.144927	-0.125225	-0.0883121
1.882	-0.394745	-0.233516	-0.189075	-0.177764	-0.188415	-0.189392	-0.190765	-0.166077	-0.150882	-0.143809	-0.126165	-0.0885598
1.883	-0.39253	-0.233512	-0.188785	-0.17622	-0.186812	-0.18964	-0.189978	-0.166367	-0.148276	-0.142449	-0.126753	-0.0891018
1.884	-0.390407	-0.233085	-0.1884	-0.174323	-0.185308	-0.189862	-0.189017	-0.166062	-0.145508	-0.141003	-0.126987	-0.089884
1.885	-0.388208	-0.232389	-0.188104	-0.17231	-0.183932	-0.189937	-0.187817	-0.165342	-0.142778	-0.139629	-0.126915	-0.0908383
1.886	-0.385922	-0.23162	-0.187965	-0.170452	-0.182694	-0.189883	-0.186454	-0.164326	-0.14041	-0.138405	-0.126585	-0.0918386
1.887	-0.383596	-0.230843	-0.187934	-0.168947	-0.181666	-0.189652	-0.185221	-0.163106	-0.138626	-0.137437	-0.126171	-0.0927555
1.888	-0.381139	-0.230028	-0.18793	-0.167877	-0.180852	-0.189185	-0.184371	-0.161886	-0.137413	-0.136906	-0.125818	-0.0934581
1.889	-0.378399	-0.229187	-0.187812	-0.167256	-0.180215	-0.188562	-0.183933	-0.160912	-0.136731	-0.136937	-0.125486	-0.0938823
1.89	-0.375378	-0.228266	-0.187412	-0.167063	-0.179822	-0.187878	-0.183816	-0.160276	-0.136645	-0.137426	-0.125087	-0.0941248
1.891	-0.372142	-0.227112	-0.186682	-0.16722	-0.179706	-0.187139	-0.183871	-0.159952	-0.137143	-0.138133	-0.124672	-0.0942745
1.892	-0.368688	-0.225697	-0.185789	-0.167626	-0.179748	-0.18634	-0.183851	-0.159877	-0.138072	-0.138952	-0.124404	-0.094277
1.893	-0.365118	-0.224207	-0.185013	-0.168292	-0.179877	-0.185595	-0.183549	-0.15994	-0.13933	-0.139869	-0.12433	-0.094064
1.894	-0.361694	-0.222856	-0.18454	-0.169362	-0.180069	-0.185106	-0.182992	-0.160089	-0.140918	-0.140806	-0.124316	-0.0936812
1.895	-0.358625	-0.221667	-0.18436	-0.170862	-0.180184	-0.184884	-0.18235	-0.160366	-0.142749	-0.14167	-0.124299	-0.0932473
1.896	-0.356002	-0.220514	-0.184323	-0.172573	-0.180061	-0.184749	-0.181698	-0.160758	-0.144549	-0.142358	-0.124362	-0.0928427
1.897	-0.353898	-0.219366	-0.184284	-0.174267	-0.179629	-0.184618	-0.180981	-0.161132	-0.146061	-0.142727	-0.124478	-0.0925374
1.898	-0.352341	-0.218333	-0.184164	-0.175914	-0.178909	-0.184503	-0.180136	-0.16133	-0.147205	-0.142742	-0.124459	-0.0924254
1.899	-0.351331	-0.217471	-0.183926	-0.177592	-0.177951	-0.184413	-0.17915	-0.161356	-0.147982	-0.142551	-0.124085	-0.0925368
1.9	-0.350872	-0.216717	-0.183573	-0.179207	-0.176709	-0.184381	-0.177995	-0.161405	-0.148384	-0.142338	-0.123147	-0.0929141
1.901	-0.350923	-0.21599	-0.183144	-0.180466	-0.175141	-0.184392	-0.176594	-0.161649	-0.148407	-0.142216	-0.12165	-0.0936459
1.902	-0.35143	-0.215311	-0.182654	-0.181188	-0.173471	-0.184421	-0.175039	-0.162026	-0.148142	-0.14227	-0.119858	-0.0946262
1.903	-0.352394	-0.214797	-0.182047	-0.181376	-0.172144	-0.184515	-0.173654	-0.162402	-0.147867	-0.142592	-0.117979	-0.095565
1.904	-0.353869	-0.214466	-0.181281	-0.181021	-0.171445	-0.184575	-0.172681	-0.162865	-0.147907	-0.143257	-0.116099	-0.0962993
1.905	-0.355941	-0.214189	-0.180424	-0.180139	-0.171344	-0.184329	-0.172102	-0.163434	-0.148298	-0.144244	-0.114436	-0.0967565
1.906	-0.358568	-0.213853	-0.17957	-0.178858	-0.171816	-0.183667	-0.171896	-0.163842	-0.14876	-0.14534	-0.113313	-0.0967882
1.907	-0.361487	-0.213501	-0.178765	-0.177281	-0.172964	-0.182716	-0.172146	-0.163883	-0.149026	-0.146222	-0.112744	-0.0963758
1.908	-0.364357	-0.213284	-0.178061	-0.17542	-0.174705	-0.18165	-0.172876	-0.16355	-0.149112	-0.146753	-0.112341	-0.0956968
1.909	-0.366913	-0.213239	-0.177482	-0.173338	-0.176633	-0.180589	-0.173978	-0.162893	-0.149159	-0.146952	-0.111874	-0.094879
1.91	-0.369057	-0.213179	-0.177078	-0.171236	-0.178311	-0.179537	-0.17523	-0.162027	-0.149099	-0.146701	-0.111579	-0.093921
1.911	-0.370849	-0.212858	-0.176915	-0.169302	-0.179509	-0.178438	-0.176444	-0.161153	-0.14872	-0.145842	-0.111727	-0.0927855
1.912	-0.372401	-0.212196	-0.176869	-0.167574	-0.180138	-0.177335	-0.177518	-0.160477	-0.148015	-0.144472	-0.112301	-0.0915068
1.913	-0.373836	-0.211346	-0.176703	-0.166069	-0.180127	-0.176295	-0.17824	-0.160114	-0.14719	-0.142852	-0.113176	-0.0902332
1.914	-0.375257	-0.210548	-0.176372	-0.164856	-0.179478	-0.175343	-0.178331	-0.159997	-0.146351	-0.141198	-0.114241	-0.0890982
1.915	-0.376661	-0.20994	-0.176007	-0.163899	-0.178362	-0.174706	-0.177729	-0.159995	-0.145408	-0.139747	-0.115348	-0.0880441
1.916	-0.377959	-0.209509	-0.175635	-0.163128	-0.17707	-0.174739	-0.176667	-0.160184	-0.144273	-0.138756	-0.116351	-0.0869391
1.917	-0.379092	-0.209188	-0.175143	-0.162595	-0.175899	-0.175467	-0.175408	-0.160745	-0.143061	-0.138286	-0.117255	-0.0858564
1.918	-0.380095	-0.208977	-0.174555	-0.162361	-0.175086	-0.17661	-0.174059	-0.161663	-0.141935	-0.138118	-0.118178	-0.0849861
1.919	-0.381004	-0.208911	-0.174071	-0.162381	-0.174721	-0.177931	-0.172712	-0.162761	-0.140911	-0.137907	-0.119075	-0.0844286
1.92	-0.381727	-0.20899	-0.173856	-0.162523	-0.174729	-0.179263	-0.171595	-0.163825	-0.140023	-0.137428	-0.119653	-0.0842631
1.921	-0.381999	-0.209135	-0.17395	-0.162662	-0.174921	-0.180419	-0.170915	-0.164643	-0.139467	-0.136709	-0.119657	-0.0845385
1.922	-0.381562	-0.209175	-0.17432	-0.162711	-0.175132	-0.181188	-0.170724	-0.165076	-0.139391	-0.135838	-0.119122	-0.0851334
1.923	-0.380339	-0.209104	-0.17492	-0.1626	-0.175422	-0.181409	-0.170928	-0.165092	-0.139743	-0.134856	-0.118256	-0.0857789
1.924	-0.378313	-0.209198	-0.175709	-0.162307	-0.175964	-0.181079	-0.171393	-0.164682	-0.140295	-0.133904	-0.1171	-0.0862141
1.925	-0.375484	-0.209718	-0.17663	-0.16185	-0.176691	-0.180329	-0.172042	-0.163801	-0.14072	-0.133152	-0.115579	-0.0863405
1.926	-0.371954	-0.210657	-0.17763	-0.161235	-0.177318	-0.179223	-0.172741	-0.162468	-0.140785	-0.132585	-0.113877	-0.086222
1.927	-0.367861	-0.211808	-0.178616	-0.160474	-0.177609	-0.177735	-0.173181	-0.160778	-0.140461	-0.132079	-0.112367	-0.085921
1.928	-0.363372	-0.212967	-0.179393	-0.159635	-0.177544	-0.175971	-0.173172	-0.158762	-0.139744	-0.131629	-0.111193	-0.0854136
1.929	-0.358741	-0.213969	-0.179782	-0.158862	-0.177303	-0.174227	-0.172812	-0.156386	-0.138544	-0.131358	-0.110219	-0.0847415
1.93	-0.354231	-0.214662	-0.179779	-0.158219	-0.177083	-0.172781	-0.172216	-0.153772	-0.136754	-0.13135	-0.109415	-0.0841049
1.931	-0.349924	-0.214941	-0.179454	-0.157578	-0.176879	-0.171661	-0.171449	-0.151331	-0.1344	-0.131552	-0.108961	-0.0837164
1.932	-0.345709	-0.214768	-0.178843	-0.156797	-0.176508	-0.170737	-0.170643	-0.149446	-0.131691	-0.131858	-0.108902	-0.0836793
1.933	-0.341517	-0.214242	-0.178028	-0.155875	-0.175901	-0.169953	-0.169864	-0.148172	-0.128863	-0.132214	-0.109045	-0.0839615
1.934	-0.337393	-0.213542	-0.177083	-0.154848	-0.175093	-0.169307	-0.169087	-0.147356	-0.1262	-0.132684	-0.109186	-0.0844264
1.935	-0.333372	-0.21273	-0.17594	-0.153749	-0.17399	-0.168717	-0.168354	-0.146755	-0.124056	-0.133288	-0.109315	-0.0848769
1.936	-0.329448	-0.21178	-0.174529	-0.152738	-0.172473	-0.168087	-0.167686	-0.146016	-0.122614	-0.133858	-0.109563	-0.0851003
1.937	-0.325554	-0.210677	-0.17297	-0.15204	-0.170623	-0.167471	-0.167059	-0.144727	-0.121817	-0.134285	-0.109847	-0.0850382
1.938	-0.321543	-0.209402	-0.171545	-0.151746	-0.168714	-0.167005	-0.166566	-0.142691	-0.121537	-0.134608	-0.109885	-0.0848804
1.939	-0.317307	-0.207968	-0.170471	-0.151809	-0.167033	-0.166735	-0.166293	-0.140164	-0.121705	-0.134822	-0.109627	-0.0848589
1.94	-0.312931	-0.206446	-0.169753	-0.152192	-0.165678	-0.166598	-0.166092	-0.137589	-0.122226	-0.134872	-0.109377	-0.0849723
1.941	-0.308662	-0.204944	-0.16928	-0.152873	-0.164607	-0.166456	-0.165796	-0.135255	-0.122864	-0.134728	-0.109481	-0.0849921
1.942	-0.304756	-0.203627	-0.168964	-0.153823	-0.163825	-0.166242	-0.165438	-0.13328	-0.123437	-0.134382	-0.109996	-0.0847499
1.943	-0.301444	-0.202629	-0.168771	-0.154995	-0.163363	-0.166062	-0.16504	-0.131686	-0.123964	-0.13388	-0.110768	-0.0842636
1.944	-0.298943	-0.201932	-0.168647	-0.156293	-0.163122	-0.165956	-0.164385	-0.130494	-0.124519	-0.133245	-0.111694	-0.0836051
1.945	-0.297332	-0.20141	-0.168524	-0.157612	-0.162974	-0.165775	-0.163182	-0.129764	-0.125084	-0.132449	-0.112681	-0.0828181
1.946	-0.296583	-0.200953	-0.168415	-0.15883	-0.162976	-0.165433	-0.161451	-0.129515	-0.12568	-0.131472	-0.113591	-0.0819578
1.947	-0.296652	-0.200452	-0.168343	-0.159717	-0.163273	-0.16497	-0.159515	-0.129739	-0.126447	-0.130332	-0.114263	-0.0811791
1.948	-0.297412	-0.199785	-0.168219	-0.160061	-0.163893	-0.164449	-0.157613	-0.130381	-0.127453	-0.129166	-0.114516	-0.0807379
1.949	-0.298753	-0.198926	-0.167872	-0.159814	-0.164707	-0.163943	-0.155791	-0.131366	-0.128608	-0.128234	-0.114264	-0.0808347
1.95	-0.300798	-0.197972	-0.16726	-0.159007	-0.165484	-0.163537	-0.154097	-0.132701	-0.129791	-0.127755	-0.113639	-0.0814423
1.951	-0.303761	-0.197022	-0.166541	-0.157699	-0.165973	-0.163225	-0.152679	-0.134361	-0.130877	-0.127731	-0.112889	-0.0822897
1.952	-0.307613	-0.196094	-0.165884	-0.1561	-0.166062	-0.162908	-0.151731	-0.136123	-0.131699	-0.128041	-0.112012	-0.0830554
1.953	-0.312136	-0.195154	-0.165391	-0.15452	-0.165826	-0.162587	-0.151422	-0.137703	-0.132159	-0.128738	-0.110675	-0.0836316
1.954	-0.317178	-0.194187	-0.16513	-0.153158	-0.165363	-0.162347	-0.151733	-0.139036	-0.132305	-0.130025	-0.108682	-0.0841393
1.955	-0.322651	-0.193229	-0.165042	-0.152081	-0.164736	-0.162156	-0.152382	-0.14022	-0.132166	-0.131915	-0.106278	-0.0846034
1.956	-0.32836	-0.192306	-0.164902	-0.151294	-0.164065	-0.161893	-0.153031	-0.141303	-0.131698	-0.134159	-0.10389	-0.0848587
1.957	-0.333977	-0.191439	-0.164581	-0.150789	-0.163492	-0.161544	-0.153599	-0.1423	-0.131047	-0.136415	-0.101793	-0.0847954
1.958	-0.339207	-0.190741	-0.164165	-0.150665	-0.163131	-0.16119	-0.154253	-0.143288	-0.130499	-0.138408	-0.100148	-0.0844252
1.959	-0.343927	-0.190359	-0.163706	-0.151107	-0.162993	-0.16084	-0.15502	-0.144405	-0.130139	-0.139988	-0.0991349	-0.0838744
1.96	-0.348167	-0.190303	-0.16316	-0.152155	-0.162924	-0.160318	-0.155584	-0.145772	-0.129886	-0.141054	-0.0988697	-0.0833101
1.961	-0.352027	-0.190488	-0.162566	-0.153639	-0.162748	-0.159465	-0.155597	-0.147378	-0.129568	-0.141515	-0.0992563	-0.0826885
1.962	-0.355603	-0.190843	-0.162075	-0.155369	-0.162499	-0.15842	-0.154995	-0.149008	-0.128937	-0.141313	-0.0999918	-0.0818534
1.963	-0.358884	-0.191252	-0.161794	-0.157289	-0.162386	-0.157482	-0.15396	-0.150324	-0.127952	-0.140392	-0.100795	-0.080921
1.964	-0.36179	-0.191476	-0.161651	-0.159381	-0.162525	-0.156844	-0.152739	-0.151053	-0.126818	-0.138793	-0.101694	-0.080228
1.965	-0.364244	-0.191336	-0.161464	-0.161372	-0.162847	-0.156486	-0.151465	-0.151094	-0.125742	-0.13674	-0.102902	-0.0799484
1.966	-0.36621	-0.190919	-0.161131	-0.162707	-0.163235	-0.15623	-0.150237	-0.150449	-0.12489	-0.134524	-0.104419	-0.0800333
1.967	-0.367743	-0.190479	-0.1607	-0.163063	-0.163602	-0.156044	-0.149276	-0.149118	-0.12436	-0.132337	-0.105903	-0.0804792
1.968	-0.368936	-0.190284	-0.160247	-0.162596	-0.163929	-0.156083	-0.148765	-0.147155	-0.124098	-0.130171	-0.106993	-0.0813437
1.969	-0.369751	-0.190597	-0.159781	-0.161569	-0.164215	-0.156354	-0.148658	-0.144687	-0.124022	-0.1279	-0.10759	-0.0824848
1.97	-0.369975	-0.191592	-0.159321	-0.160106	-0.164402	-0.156716	-0.148753	-0.141886	-0.124113	-0.125532	-0.107778	-0.083586
1.971	-0.369477	-0.19327	-0.158997	-0.158298	-0.164448	-0.157221	-0.1489	-0.138964	-0.124305	-0.123302	-0.107662	-0.0844181
1.972	-0.368398	-0.195426	-0.158992	-0.156323	-0.164351	-0.15808	-0.149097	-0.136181	-0.124417	-0.12148	-0.107248	-0.084939
1.973	-0.366959	-0.19771	-0.15942	-0.154443	-0.164175	-0.159323	-0.149388	-0.133794	-0.124295	-0.120215	-0.106393	-0.0852336
1.974	-0.365269	-0.199834	-0.160313	-0.152911	-0.16414	-0.160722	-0.149752	-0.132024	-0.123986	-0.11952	-0.105045	-0.0853523
1.975	-0.363376	-0.20161	-0.161578	-0.151892	-0.164462	-0.162023	-0.150089	-0.131001	-0.123676	-0.119345	-0.103467	-0.0852064
1.976	-0.361275	-0.202834	-0.162933	-0.151416	-0.165062	-0.1632	-0.150292	-0.130667	-0.123427	-0.119612	-0.102064	-0.0847321
1.977	-0.358972	-0.203402	-0.164091	-0.151379	-0.16564	-0.164472	-0.150322	-0.130845	-0.123092	-0.12019	-0.101111	-0.0840249
1.978	-0.356571	-0.203398	-0.164941	-0.151538	-0.166008	-0.165981	-0.150241	-0.131465	-0.122587	-0.1209	-0.100628	-0.0832089
1.979	-0.354179	-0.202994	-0.165459	-0.151581	-0.166115	-0.167655	-0.150129	-0.132544	-0.122004	-0.121553	-0.100476	-0.0822733
1.98	-0.351768	-0.20237	-0.16563	-0.151281	-0.165888	-0.169403	-0.150016	-0.134013	-0.121395	-0.121988	-0.100524	-0.0811021
1.981	-0.349227	-0.201636	-0.165457	-0.150586	-0.165153	-0.171131	-0.149907	-0.135714	-0.120758	-0.12213	-0.100682	-0.0796523
1.982	-0.346517	-0.200811	-0.164909	-0.149645	-0.163766	-0.172637	-0.149765	-0.137467	-0.120134	-0.122004	-0.100862	-0.07809
1.983	-0.343657	-0.19994	-0.163997	-0.148755	-0.161804	-0.173743	-0.14953	-0.139136	-0.119533	-0.121667	-0.100979	-0.076784
1.984	-0.340656	-0.199106	-0.162871	-0.148144	-0.159453	-0.174402	-0.149178	-0.140691	-0.118998	-0.121134	-0.101021	-0.0760739
1.985	-0.337578	-0.198371	-0.161702	-0.147764	-0.156835	-0.174549	-0.148686	-0.142093	-0.11872	-0.120378	-0.1011	-0.075918
1.986	-0.334534	-0.19774	-0.160571	-0.147476	-0.154169	-0.174096	-0.148065	-0.143167	-0.118876	-0.11939	-0.10129	-0.0759347
1.987	-0.331536	-0.197144	-0.159526	-0.14728	-0.151832	-0.173042	-0.147438	-0.143774	-0.119403	-0.118193	-0.101474	-0.0759012
1.988	-0.32853	-0.196447	-0.158605	-0.147196	-0.150077	-0.171422	-0.146933	-0.14401	-0.120053	-0.116826	-0.101394	-0.0758836
1.989	-0.325519	-0.195596	-0.157849	-0.147178	-0.148939	-0.169283	-0.146514	-0.144028	-0.120607	-0.115381	-0.100535	-0.0759118
1.99	-0.322512	-0.194728	-0.15731	-0.147219	-0.148375	-0.166705	-0.146035	-0.143814	-0.120923	-0.114035	-0.098228	-0.0758582
1.991	-0.319483	-0.194043	-0.156969	-0.147449	-0.148307	-0.163802	-0.145495	-0.143387	-0.120907	-0.11306	-0.0941732	-0.0756154
1.992	-0.316414	-0.193608	-0.156742	-0.148024	-0.148677	-0.160753	-0.145086	-0.14291	-0.120588	-0.112616	-0.0886777	-0.075283
1.993	-0.313405	-0.193351	-0.156586	-0.148934	-0.149435	-0.157807	-0.144875	-0.142506	-0.120185	-0.112559	-0.0824146	-0.0750779
1.994	-0.310682	-0.193097	-0.156485	-0.150102	-0.150446	-0.155184	-0.144651	-0.142199	-0.11985	-0.112689	-0.0762049	-0.0750437
1.995	-0.308319	-0.192625	-0.156369	-0.151499	-0.151528	-0.153072	-0.144256	-0.141904	-0.119403	-0.113055	-0.070962	-0.0750598
1.996	-0.306192	-0.191837	-0.156127	-0.15303	-0.152491	-0.151676	-0.14381	-0.141503	-0.118617	-0.113725	-0.0675434	-0.0751139
1.997	-0.304306	-0.190781	-0.155728	-0.154468	-0.153141	-0.151082	-0.143437	-0.141043	-0.117569	-0.114544	-0.0664859	-0.0753185
1.998	-0.302801	-0.189539	-0.155243	-0.15561	-0.15343	-0.151196	-0.143102	-0.140665	-0.116477	-0.115319	-0.0678444	-0.0757418
[truncated: 1,001 more rows]

## Sheet: WT_K_S1_N2
	300	100	30	10	3	1	0.3	0.1	0.03	0.01	0.003	0
0	7.76e-05	3.71e-06	-2.21e-05	-1.11e-05	3.32e-05	-3.68e-06	4.43e-05	-3.32e-05	7.4e-06	-1.11e-05	2.59e-05	2.96e-05
0.001	0.000464774	-5.91e-06	-0.000107886	-4.1e-05	0.000186054	-3.45e-05	0.000216043	-0.000193257	8.78e-05	1.07e-05	0.000168523	0.00012929
0.002	0.0013748	-0.000113393	-0.000257624	-3.52e-05	0.000469975	-0.000137526	0.000431188	-0.000523854	0.000375124	0.000168724	0.00054229	0.000224186
0.003	0.00278518	-0.000407093	-0.000407755	0.000122581	0.000778294	-0.000342969	0.000449637	-0.00092899	0.000935738	0.000333507	0.00114233	0.00013248
0.004	0.00455427	-0.000839345	-0.000476601	0.000499743	0.00105857	-0.000644695	0.000276786	-0.00131598	0.00174767	0.000113922	0.00177397	-0.000248485
0.005	0.00663549	-0.00127117	-0.000452215	0.00107161	0.00131339	-0.000989915	0.000203754	-0.00174715	0.00279085	-0.000619094	0.00215596	-0.000847974
0.006	0.00897649	-0.0016482	-0.00038568	0.00188156	0.00147892	-0.00131083	0.000362599	-0.00240583	0.00394754	-0.0015194	0.00208961	-0.00151484
0.007	0.0113826	-0.00196232	-0.00027817	0.00306794	0.00145183	-0.00155613	0.00053758	-0.0034101	0.0050133	-0.00226711	0.00158285	-0.00216997
0.008	0.0136229	-0.00208485	-0.000105097	0.00454121	0.00116683	-0.00161809	0.000445217	-0.00462001	0.00592596	-0.00292045	0.000814426	-0.00283888
0.009	0.0154526	-0.00186694	9.68e-05	0.00581166	0.000600994	-0.00144791	5.41e-05	-0.00571332	0.00674055	-0.00362984	-4.53e-05	-0.00357686
0.01	0.016581	-0.00133572	0.000262654	0.00639141	-0.000251184	-0.00123208	-0.00042228	-0.00650524	0.00736621	-0.00437007	-0.000940043	-0.00432415
0.011	0.0168144	-0.000545396	0.000377209	0.00633311	-0.00134906	-0.00119913	-0.000807112	-0.00710803	0.00758833	-0.00498457	-0.00182896	-0.00483467
0.012	0.016217	0.000625006	0.000565957	0.00620261	-0.00261243	-0.00136925	-0.00119808	-0.00768894	0.00733089	-0.00534473	-0.00260416	-0.00494219
0.013	0.0150483	0.0023904	0.00104741	0.00653156	-0.00388795	-0.00151139	-0.00189939	-0.00823411	0.00670899	-0.00552621	-0.0031797	-0.00478732
0.014	0.0135173	0.00492123	0.0018983	0.00734499	-0.0048819	-0.00132218	-0.0030259	-0.00868407	0.00586956	-0.00577006	-0.00355298	-0.00453921
0.015	0.011705	0.00823124	0.00304561	0.00826928	-0.0053126	-0.000696646	-0.00424145	-0.00911293	0.0048694	-0.00619416	-0.0038003	-0.00415481
0.016	0.00972351	0.0121312	0.00445409	0.00898804	-0.00513303	0.000222219	-0.00506485	-0.0096195	0.00374298	-0.00665727	-0.00441654	-0.00363111
0.017	0.00783772	0.0162176	0.00611097	0.00938459	-0.00455968	0.0011498	-0.0052923	-0.0100569	0.0025961	-0.00696855	-0.00626931	-0.00314512
0.018	0.0063782	0.0199232	0.00793386	0.00949754	-0.00385534	0.0018529	-0.00504548	-0.0100545	0.00154761	-0.0071357	-0.0092746	-0.00276027
0.019	0.00552676	0.0228156	0.00972567	0.00950857	-0.00309782	0.00232849	-0.0046028	-0.0093747	0.000601649	-0.00735931	-0.0120883	-0.00234317
0.02	0.00526251	0.0247628	0.0111522	0.00960906	-0.00225725	0.00267949	-0.00413427	-0.00810896	-0.000408689	-0.00771481	-0.0135643	-0.00196237
0.021	0.0054681	0.0257655	0.0119484	0.00993445	-0.00137427	0.0028918	-0.00356749	-0.0065398	-0.00161765	-0.00796898	-0.0133794	-0.00207921
0.022	0.00601298	0.0258915	0.0121578	0.0106223	-0.000563157	0.00288307	-0.00283862	-0.00493911	-0.00289047	-0.00787256	-0.0116894	-0.00302811
0.023	0.00675455	0.0252993	0.0119962	0.0115186	6.92e-05	0.0026801	-0.00209275	-0.00350032	-0.00400656	-0.00740517	-0.00897059	-0.00439505
0.024	0.00746617	0.0240805	0.0116208	0.0118501	0.000505059	0.0024425	-0.00153004	-0.00231942	-0.00489551	-0.00662053	-0.00591445	-0.00532892
0.025	0.00788925	0.0222267	0.0111309	0.0108085	0.000891463	0.0022469	-0.0012712	-0.00142534	-0.00551138	-0.00554539	-0.00323045	-0.00552067
0.026	0.00788573	0.0198767	0.0106687	0.00828743	0.00138939	0.00186711	-0.00134179	-0.000845051	-0.00575257	-0.00436146	-0.00137091	-0.0053962
0.027	0.00746191	0.0172849	0.0104202	0.00472458	0.00180682	0.000976433	-0.00166139	-0.000549325	-0.00558041	-0.00334414	-0.000357114	-0.00526826
0.028	0.00672085	0.014576	0.0104763	0.00068656	0.00168094	-0.000461455	-0.00213884	-0.000398786	-0.0051411	-0.00254879	4.15e-05	-0.00485622
0.029	0.00581424	0.0118172	0.0108096	-0.00323087	0.000849006	-0.00212986	-0.00280036	-0.00026628	-0.00478385	-0.00183464	5.45e-05	-0.00382972
0.03	0.00485506	0.009093	0.0113198	-0.00651428	-0.000350945	-0.00362438	-0.00372314	-0.000258322	-0.00486151	-0.00123945	-0.000188513	-0.00233006
0.031	0.00396228	0.00643293	0.011811	-0.009018	-0.00150656	-0.00481093	-0.00478086	-0.000706668	-0.00552359	-0.00105061	-0.000722554	-0.000759866
0.032	0.00341403	0.00389098	0.0121366	-0.0109405	-0.00247362	-0.00583154	-0.00558301	-0.00180454	-0.00668532	-0.00131528	-0.00159949	0.000676077
0.033	0.00350917	0.0015758	0.0123333	-0.0124432	-0.00326698	-0.00673835	-0.00577888	-0.00334607	-0.00810766	-0.00165526	-0.00253669	0.00210469
0.034	0.00432516	-0.000479679	0.0125072	-0.0135231	-0.00388112	-0.00742048	-0.00530336	-0.00485293	-0.00951036	-0.00163347	-0.00301056	0.00362783
0.035	0.0057613	-0.00232651	0.0126953	-0.0141773	-0.00419749	-0.0078408	-0.00432671	-0.00594068	-0.010648	-0.00105923	-0.00278658	0.0049858
0.036	0.00762865	-0.00395871	0.012804	-0.014498	-0.00404918	-0.00803463	-0.00318479	-0.00653942	-0.0113587	-0.000125623	-0.00206816	0.00580597
0.037	0.00964771	-0.00524232	0.0126956	-0.0146385	-0.0034541	-0.00794712	-0.00223798	-0.00670829	-0.011579	0.000769297	-0.0011465	0.00592141
0.038	0.0114844	-0.00598671	0.0123657	-0.0147419	-0.00264716	-0.00751148	-0.00158137	-0.00650326	-0.0113324	0.0014499	-0.000162551	0.00527653
0.039	0.0128432	-0.00608309	0.0118899	-0.0148351	-0.00182646	-0.00678984	-0.00110135	-0.00607202	-0.0106742	0.00200568	0.000825477	0.00388166
0.04	0.0135518	-0.00553284	0.011258	-0.014751	-0.00103708	-0.00594437	-0.000761743	-0.00559273	-0.0096676	0.00245127	0.00182962	0.00200126
0.041	0.0135751	-0.00437387	0.0104337	-0.014286	-0.00028014	-0.00518627	-0.000698373	-0.00507808	-0.00842774	0.002655	0.0029342	0.000165712
0.042	0.0130451	-0.00268355	0.00949455	-0.0135121	0.000397341	-0.00464847	-0.00112867	-0.00429305	-0.00703166	0.0026522	0.00405633	-0.00110691
0.043	0.0122188	-0.000606513	0.00860022	-0.0128042	0.0007549	-0.00433279	-0.00200319	-0.00294944	-0.00545934	0.00276651	0.00483185	-0.00156886
0.044	0.011255	0.00163572	0.00787254	-0.0123285	0.000392975	-0.0042102	-0.00289424	-0.00104092	-0.00376775	0.00328829	0.00492957	-0.00125333
0.045	0.0101498	0.00374025	0.00731535	-0.011607	-0.000947038	-0.00415345	-0.00343323	0.00110129	-0.00218646	0.00414255	0.00438422	-0.000245798
0.046	0.00889436	0.00539015	0.00688002	-0.0100251	-0.00325829	-0.00393958	-0.00356977	0.00306845	-0.00092589	0.00491095	0.00354993	0.0013913
0.047	0.00754415	0.00641397	0.0065934	-0.00765592	-0.00629723	-0.00351673	-0.00341672	0.00456196	-4.34e-05	0.00521327	0.00279891	0.00341332
0.048	0.00619875	0.00688084	0.00651179	-0.00519056	-0.00968083	-0.00305771	-0.0031432	0.00541156	0.000331823	0.00499533	0.00235388	0.00539193
0.049	0.00498225	0.00694716	0.00665046	-0.00328093	-0.0130324	-0.002718	-0.00299838	0.00553098	-7.52e-05	0.00438469	0.00231717	0.00687093
0.05	0.00396414	0.00664892	0.00697355	-0.00219897	-0.0160263	-0.0025352	-0.00320051	0.00493306	-0.00130688	0.0034905	0.00267429	0.00743386
0.051	0.00311181	0.00593578	0.00738533	-0.00192906	-0.0183759	-0.0025124	-0.003818	0.00387549	-0.00297293	0.00239284	0.00334137	0.00688095
0.052	0.00246806	0.00486821	0.00779859	-0.00232643	-0.0198946	-0.00264128	-0.0048649	0.00274432	-0.00458016	0.00123522	0.00423133	0.00544267
0.053	0.00235265	0.0036395	0.0081793	-0.00315954	-0.0205746	-0.00287921	-0.00629978	0.00171094	-0.00597714	0.000250734	0.00520652	0.0036971
0.054	0.00318467	0.0024101	0.00849015	-0.00431205	-0.0205977	-0.00319438	-0.00787103	0.000729649	-0.00719369	-0.000433391	0.00608209	0.0022294
0.055	0.00509552	0.0012829	0.00862857	-0.00598458	-0.020241	-0.00356321	-0.00921275	-0.000248765	-0.00798705	-0.000895939	0.00667157	0.00136595
0.056	0.00783245	0.000369303	0.00848619	-0.00828206	-0.0196299	-0.00392414	-0.0101227	-0.00121341	-0.00813378	-0.00121643	0.00683418	0.00120422
0.057	0.0109126	-0.00027532	0.0080834	-0.0107352	-0.0186954	-0.00423711	-0.0106337	-0.00211953	-0.00784242	-0.00135659	0.00652295	0.00174214
0.058	0.0137622	-0.000687134	0.00753457	-0.0126138	-0.017414	-0.00447634	-0.0108791	-0.00290435	-0.00740422	-0.00134665	0.00569536	0.00278692
0.059	0.0159225	-0.000892443	0.00692191	-0.0135119	-0.0159163	-0.00455125	-0.010945	-0.00349198	-0.00689332	-0.00138191	0.00429942	0.00391451
0.06	0.0172109	-0.000869246	0.00634517	-0.0134019	-0.014439	-0.00437501	-0.0108189	-0.0037775	-0.00638558	-0.00154463	0.00247183	0.00469215
0.061	0.0176031	-0.000618712	0.00592875	-0.0123822	-0.0131654	-0.00398364	-0.0104084	-0.00369485	-0.00611363	-0.00166561	0.000529884	0.00485594
0.062	0.0170981	-0.000207456	0.00572316	-0.0106879	-0.0120733	-0.00354147	-0.00966774	-0.00339706	-0.00624224	-0.00160596	-0.0012787	0.0043518
0.063	0.0157211	0.000264651	0.00573535	-0.00868175	-0.0110926	-0.00318995	-0.00881165	-0.00318236	-0.00658055	-0.00143567	-0.0028277	0.0032896
0.064	0.0134909	0.000695782	0.0059615	-0.00669306	-0.0103008	-0.00293382	-0.00815219	-0.00318475	-0.00676569	-0.0012219	-0.00402687	0.0018055
0.065	0.010407	0.000997749	0.00643198	-0.00514397	-0.00974319	-0.00276129	-0.00775556	-0.00342774	-0.0066394	-0.000785991	-0.0048254	3.37e-05
0.066	0.00656705	0.00115619	0.00725571	-0.00452743	-0.0092036	-0.00282127	-0.0075237	-0.00401134	-0.00625469	8.21e-05	-0.00522067	-0.00182288
0.067	0.0022657	0.00120868	0.00846452	-0.00507553	-0.00842207	-0.00339658	-0.00738019	-0.00495881	-0.00578688	0.00125712	-0.00520478	-0.00357591
0.068	-0.00207868	0.00114396	0.00989207	-0.00669038	-0.00747347	-0.00459549	-0.00726473	-0.00612294	-0.00549901	0.00244118	-0.00475178	-0.00511699
0.069	-0.00599665	0.000914266	0.0112728	-0.00912389	-0.00667843	-0.00617915	-0.00707398	-0.00727319	-0.00555037	0.00358382	-0.00396899	-0.00638495
0.07	-0.00893924	0.00051068	0.0123584	-0.0121807	-0.00623854	-0.00778052	-0.00671951	-0.00817717	-0.00581264	0.00471849	-0.0031201	-0.00748759
0.071	-0.0104044	4.25e-05	0.0129614	-0.0157459	-0.00618645	-0.00914264	-0.00627319	-0.00878626	-0.00600214	0.00547223	-0.00235186	-0.00860084
0.072	-0.0102569	-0.000272338	0.0130403	-0.0196773	-0.00654384	-0.0101885	-0.00582552	-0.00927373	-0.00602871	0.00530755	-0.0015499	-0.00955105
0.073	-0.00884871	-0.000264678	0.012786	-0.0238696	-0.0073474	-0.0109436	-0.00532814	-0.00975902	-0.00600972	0.004151	-0.000569448	-0.00990241
0.074	-0.00676167	0.000130234	0.0124209	-0.0281565	-0.0085637	-0.011443	-0.00476616	-0.0101692	-0.00594036	0.00235295	0.00045359	-0.00962854
0.075	-0.00453754	0.000922431	0.011917	-0.0320162	-0.0100579	-0.0116989	-0.00422725	-0.0103811	-0.00568617	0.000198424	0.00121437	-0.00939308
0.076	-0.00260112	0.00201579	0.0111346	-0.0347993	-0.0116972	-0.0116893	-0.00373051	-0.010425	-0.00527288	-0.00226598	0.00160165	-0.00979678
0.077	-0.0012362	0.00320832	0.01007	-0.0362263	-0.0133904	-0.0114605	-0.00321072	-0.0104824	-0.00492241	-0.00489072	0.0017305	-0.0105654
0.078	-0.000585338	0.00431827	0.00880219	-0.0364089	-0.0149574	-0.0112493	-0.00275909	-0.0105953	-0.00485221	-0.00716669	0.00179739	-0.0109726
0.079	-0.000698601	0.00526389	0.00740064	-0.0356512	-0.0160763	-0.0113762	-0.00259897	-0.0106022	-0.00513812	-0.00864741	0.00196534	-0.0107527
0.08	-0.00154131	0.0060019	0.00594168	-0.034444	-0.0164849	-0.0119448	-0.0027804	-0.0103722	-0.00572526	-0.00941186	0.00226297	-0.010175
0.081	-0.00295868	0.00639462	0.00456286	-0.0334508	-0.0162036	-0.0127861	-0.00316159	-0.00989166	-0.00647112	-0.00978767	0.00261836	-0.00952932
0.082	-0.00473219	0.0062733	0.0034361	-0.033222	-0.0154094	-0.0137243	-0.00356488	-0.00920533	-0.00714306	-0.00983037	0.00284059	-0.00886487
0.083	-0.00664906	0.00559811	0.00265238	-0.0338861	-0.0142802	-0.0146976	-0.00386865	-0.00836233	-0.00745659	-0.00932172	0.00265997	-0.00817035
0.084	-0.00851015	0.00444187	0.00219145	-0.0352281	-0.0130707	-0.0156089	-0.00414009	-0.00747376	-0.0071537	-0.00822806	0.00200995	-0.00753742
0.085	-0.0101222	0.00292758	0.00194323	-0.0370259	-0.0120328	-0.0161721	-0.00454963	-0.00670301	-0.0061097	-0.00693472	0.00108116	-0.00703231
0.086	-0.0112382	0.00125206	0.00179302	-0.0392392	-0.0112424	-0.0160549	-0.00501583	-0.00610946	-0.00448572	-0.00590671	7.1e-05	-0.00662568
0.087	-0.0116276	-0.000315996	0.00168113	-0.0419125	-0.0106399	-0.015256	-0.00524802	-0.00567397	-0.002727	-0.00531677	-0.00092893	-0.00630913
0.088	-0.011249	-0.00151208	0.00155477	-0.0449828	-0.0101896	-0.0141399	-0.00520629	-0.0053493	-0.00125862	-0.00509696	-0.00189261	-0.00609555
0.089	-0.0101891	-0.00210338	0.00142396	-0.0481733	-0.0099363	-0.012995	-0.00516577	-0.00498846	-0.000264738	-0.00508881	-0.00282184	-0.00590164
0.09	-0.00858097	-0.00197479	0.00142321	-0.0511731	-0.00998655	-0.0118244	-0.00528099	-0.004412	0.000249268	-0.00501721	-0.00370441	-0.00559631
0.091	-0.00665451	-0.00127582	0.00169517	-0.0541234	-0.0104103	-0.0106085	-0.00543699	-0.00344136	0.000399764	-0.00467213	-0.00460087	-0.00518729
0.092	-0.00464918	-0.000312054	0.00219884	-0.0576838	-0.0110924	-0.00949316	-0.00562256	-0.0018467	0.000331095	-0.00421561	-0.00565	-0.00490523
0.093	-0.00268306	0.000714354	0.00272919	-0.0623028	-0.0118728	-0.00868997	-0.00600436	0.000528244	8.1e-05	-0.00388871	-0.00681059	-0.00495089
0.094	-0.000770666	0.00175959	0.00315754	-0.0677548	-0.012779	-0.00824756	-0.00649546	0.00364331	-0.000399714	-0.00351441	-0.00780463	-0.00513847
0.095	0.00102473	0.00282157	0.00347095	-0.0734339	-0.0139023	-0.00792818	-0.00679089	0.0072682	-0.00116904	-0.00285853	-0.00840239	-0.00509457
0.096	0.00250328	0.00383169	0.00366335	-0.0786782	-0.0151619	-0.00741522	-0.0069805	0.0110649	-0.00223421	-0.00226683	-0.00860979	-0.0047672
0.097	0.00356711	0.00465579	0.00379506	-0.0830355	-0.0163234	-0.00666314	-0.00754288	0.0146979	-0.00343113	-0.00216097	-0.00852578	-0.00449569
0.098	0.00441688	0.00520261	0.00399193	-0.0863872	-0.0172409	-0.00596321	-0.00862878	0.0178455	-0.00443869	-0.00220382	-0.00814088	-0.00460338
0.099	0.00529776	0.0054409	0.00429278	-0.0885692	-0.0179482	-0.00563838	-0.00982391	0.0202698	-0.00504388	-0.00176299	-0.00735183	-0.00505362
0.1	0.00627126	0.0053458	0.00461976	-0.0892211	-0.0183827	-0.0057842	-0.0105626	0.0218782	-0.00527697	-0.000762009	-0.00611737	-0.00555614
0.101	0.00727967	0.00491061	0.00487971	-0.0882683	-0.0182906	-0.00634042	-0.0105773	0.0224946	-0.00522833	0.000552785	-0.00452638	-0.00585288
0.102	0.00818667	0.004136	0.00504825	-0.0861016	-0.0175914	-0.00723626	-0.0100628	0.0217682	-0.00487441	0.00210307	-0.00273695	-0.00570555
0.103	0.00876837	0.00303805	0.00517987	-0.0832018	-0.0165435	-0.008386	-0.00940909	0.0194998	-0.00414124	0.00372411	-0.000956784	-0.00476265
0.104	0.00882892	0.00168697	0.00533135	-0.0798689	-0.0154664	-0.00964253	-0.00875794	0.0158806	-0.00308346	0.00499314	0.000515862	-0.00284811
0.105	0.00835883	0.000207705	0.00544178	-0.0762469	-0.0144814	-0.0108656	-0.00798535	0.011382	-0.00195716	0.00567	0.00146316	-0.000250352
0.106	0.00752406	-0.0012189	0.00537097	-0.0723507	-0.0135084	-0.0119825	-0.00712612	0.00651061	-0.00101519	0.00593474	0.00200265	0.00241467
0.107	0.00655528	-0.00242636	0.0051147	-0.0681863	-0.0124189	-0.0129099	-0.00644079	0.00170301	-0.000304156	0.00596209	0.00243873	0.00443086
0.108	0.00566745	-0.0033867	0.00479766	-0.0641112	-0.0111888	-0.0135187	-0.005994	-0.00258382	0.000228552	0.0056401	0.0029298	0.00533605
0.109	0.00499938	-0.00418838	0.00444267	-0.0606379	-0.00994531	-0.0137064	-0.00556203	-0.00594831	0.00057831	0.00494899	0.00349704	0.00513496
0.11	0.00455171	-0.00489235	0.00402352	-0.0577654	-0.00883099	-0.0135115	-0.00498219	-0.00825265	0.000681671	0.00417661	0.00426121	0.0041168
0.111	0.00422054	-0.0055242	0.00369602	-0.0550911	-0.00800026	-0.0131507	-0.00436373	-0.00959424	0.000520926	0.00361576	0.00536045	0.00266518
0.112	0.00406072	-0.00618122	0.00368599	-0.0523474	-0.00774894	-0.0128736	-0.00401325	-0.0102195	0.000148132	0.00335502	0.00666471	0.00104677
0.113	0.00438847	-0.00695563	0.00402302	-0.0494243	-0.00825813	-0.0127601	-0.00418035	-0.010471	-0.000408709	0.00335543	0.00786228	-0.000687911
0.114	0.00546121	-0.00776672	0.00457966	-0.0462889	-0.00929575	-0.0126376	-0.0048245	-0.0107119	-0.00114128	0.00346875	0.00909517	-0.00245241
0.115	0.00723889	-0.00838904	0.00524557	-0.043117	-0.0103698	-0.0122669	-0.00571197	-0.0112128	-0.0020008	0.00346532	0.011096	-0.00396381
0.116	0.00943476	-0.0086361	0.00598728	-0.0402175	-0.0110483	-0.0116145	-0.00667242	-0.0119858	-0.00291688	0.0032794	0.0138832	-0.00499309
0.117	0.0116782	-0.00848677	0.00675955	-0.0377741	-0.011117	-0.0108339	-0.00764587	-0.0128427	-0.00386382	0.00308581	0.0163248	-0.00565892
0.118	0.0137246	-0.00775779	0.00738336	-0.0357542	-0.0105978	-0.0100789	-0.0086647	-0.0135709	-0.0047723	0.00304958	0.0175096	-0.00620198
0.119	0.0155264	-0.00585961	0.00764718	-0.0339085	-0.00964901	-0.00943071	-0.00981239	-0.0139726	-0.00535694	0.00313473	0.0173861	-0.00658813
0.12	0.0171492	-0.00256203	0.00740701	-0.0318692	-0.00839784	-0.00889632	-0.0109417	-0.0139259	-0.00529662	0.0032189	0.0162505	-0.00674127
0.121	0.0186437	0.00147545	0.00660437	-0.0293845	-0.00695962	-0.00845794	-0.011622	-0.0134715	-0.00457528	0.00336066	0.0143158	-0.00688506
0.122	0.0199202	0.00533568	0.00540593	-0.0263275	-0.00550966	-0.00812922	-0.0116651	-0.0127189	-0.00340465	0.00377954	0.0117297	-0.0072878
0.123	0.020816	0.00843919	0.00415137	-0.0225201	-0.00416533	-0.00793239	-0.0114289	-0.0116657	-0.00196294	0.0044751	0.00864134	-0.00796309
0.124	0.0212346	0.0105852	0.00310607	-0.0177579	-0.00294697	-0.00789562	-0.0113203	-0.0102427	-0.000341095	0.00511308	0.00515093	-0.00872547
0.125	0.0210832	0.0117611	0.00239987	-0.0119277	-0.00195787	-0.00799101	-0.0113639	-0.0085624	0.00140599	0.00543847	0.00144704	-0.00936931
0.126	0.0202416	0.011938	0.00207253	-0.00517449	-0.00137058	-0.00805448	-0.0114701	-0.00695029	0.00311787	0.00556061	-0.00208922	-0.0098084
0.127	0.0186842	0.0110244	0.00204264	0.00181501	-0.00121049	-0.00793507	-0.0116246	-0.00565204	0.00453395	0.00570624	-0.00506644	-0.0101103
0.128	0.0165451	0.00892567	0.00214626	0.00782427	-0.00138926	-0.00762421	-0.0117433	-0.00468646	0.00558905	0.0059267	-0.0072827	-0.0104073
0.129	0.014112	0.00564469	0.00231269	0.0116745	-0.00183221	-0.00719835	-0.0117576	-0.0039968	0.00644253	0.00621934	-0.00873343	-0.0107342
0.13	0.0117412	0.00135944	0.00260643	0.0127631	-0.00247587	-0.0067789	-0.0117334	-0.00362029	0.00712011	0.00667329	-0.00947839	-0.0109573
0.131	0.00967996	-0.00360806	0.00308584	0.011013	-0.00327035	-0.00651689	-0.0116635	-0.00362447	0.00743304	0.00731112	-0.00952383	-0.0109297
0.132	0.00802524	-0.00886087	0.00371259	0.00665501	-0.00413928	-0.00657351	-0.0113156	-0.00387203	0.00729691	0.00806462	-0.00890356	-0.0106518
0.133	0.0068639	-0.0140239	0.00442452	0.000194454	-0.00498598	-0.00707888	-0.0104749	-0.00414059	0.00701851	0.008894	-0.00777661	-0.0102157
0.134	0.00630966	-0.0188452	0.00520855	-0.00769988	-0.00577192	-0.0080854	-0.00928664	-0.00444678	0.00713008	0.00981507	-0.00638848	-0.00974979
0.135	0.00639834	-0.0231437	0.006004	-0.0164103	-0.00648503	-0.00958916	-0.00818685	-0.00487219	0.00772672	0.0109133	-0.00500364	-0.00945177
0.136	0.00707136	-0.0266865	0.00670689	-0.0254697	-0.00712694	-0.011512	-0.00743211	-0.00522383	0.00835893	0.0121738	-0.00376863	-0.00953659
0.137	0.00819949	-0.0291629	0.00725808	-0.0344684	-0.00770801	-0.0136338	-0.00689365	-0.00515345	0.00874961	0.0133269	-0.00242649	-0.010113
0.138	0.00957847	-0.0303534	0.00753409	-0.0429955	-0.00818784	-0.0156247	-0.00634967	-0.00452688	0.00900004	0.0140178	-0.000446674	-0.0110819
0.139	0.0109821	-0.0303352	0.00739284	-0.0507277	-0.00848841	-0.0171921	-0.00578043	-0.00353945	0.00915508	0.0140409	0.00209232	-0.0121487
0.14	0.0122247	-0.0293493	0.00689208	-0.0574318	-0.0085263	-0.0181753	-0.00538035	-0.00249218	0.0092183	0.0133359	0.00429451	-0.013023
0.141	0.0131635	-0.0275852	0.00621493	-0.0630557	-0.0082843	-0.0185336	-0.00531686	-0.00161817	0.00952004	0.0118707	0.00528614	-0.0135928
0.142	0.0136639	-0.0252082	0.00549461	-0.0677898	-0.00784087	-0.0183692	-0.00553916	-0.00107899	0.0104259	0.0098015	0.0047868	-0.0138264
0.143	0.0136578	-0.0224145	0.00480604	-0.0716644	-0.00721613	-0.01787	-0.00597656	-0.000927965	0.0116438	0.00754028	0.00308137	-0.0136433
0.144	0.0132326	-0.0194182	0.00421925	-0.0744521	-0.00636371	-0.0171519	-0.00671474	-0.00115942	0.0123833	0.00532913	0.00066754	-0.01298
0.145	0.0125159	-0.016445	0.00379722	-0.0759994	-0.00534631	-0.0163191	-0.00774165	-0.0018168	0.0121309	0.00313091	-0.00203104	-0.0118828
0.146	0.011506	-0.0136732	0.00352044	-0.0760346	-0.00425051	-0.0155578	-0.00884045	-0.00286533	0.0108377	0.00116711	-0.00465479	-0.0104824
0.147	0.0101801	-0.0111722	0.00328042	-0.0740255	-0.00302542	-0.0149086	-0.00994553	-0.00416147	0.00855943	-0.000131449	-0.00681023	-0.00889574
0.148	0.00872118	-0.00895597	0.002961	-0.0696825	-0.00163443	-0.0140941	-0.0112207	-0.0056688	0.00530088	-0.00085723	-0.00813504	-0.00725817
0.149	0.00743707	-0.00698596	0.00256645	-0.0633848	-0.000153279	-0.0128305	-0.0126343	-0.00732668	0.00120214	-0.00141888	-0.00851396	-0.00580459
0.15	0.00653474	-0.00510273	0.00225126	-0.0561684	0.00147524	-0.0112486	-0.0139184	-0.00887059	-0.00330628	-0.00174757	-0.00810408	-0.00473538
0.151	0.00606793	-0.00313156	0.00214593	-0.0492892	0.0034307	-0.00972669	-0.0149553	-0.0101393	-0.00764357	-0.00150552	-0.00709375	-0.00402673
0.152	0.00597304	-0.00101121	0.00229403	-0.0435146	0.00565277	-0.00840075	-0.0157322	-0.0112284	-0.0113457	-0.000673116	-0.00553985	-0.00349352
0.153	0.0061646	0.00122163	0.0027144	-0.0387543	0.00785207	-0.00717771	-0.0161227	-0.0121579	-0.0141544	0.000583685	-0.00314626	-0.00302965
0.154	0.006591	0.00345467	0.00331153	-0.0343949	0.00976392	-0.00610005	-0.0160103	-0.0126765	-0.0159654	0.00223053	0.000589098	-0.00264284
0.155	0.00720171	0.00549144	0.00387878	-0.0297619	0.0112087	-0.00540991	-0.0154734	-0.012487	-0.0167716	0.00413623	0.00535207	-0.00234316
0.156	0.00798252	0.00709955	0.004334	-0.0242051	0.0121018	-0.00519251	-0.0147713	-0.0115422	-0.0166414	0.00579746	0.00988841	-0.00218657
0.157	0.00893653	0.00815372	0.00471188	-0.0172922	0.0124815	-0.00519451	-0.0141321	-0.0101474	-0.0157369	0.00678947	0.0131239	-0.00230532
0.158	0.00997562	0.00865964	0.00494761	-0.00910672	0.0124838	-0.00515183	-0.0136244	-0.00871691	-0.0142992	0.00718976	0.0146426	-0.00281484
0.159	0.0109804	0.00863823	0.00493549	-0.00015043	0.0122467	-0.00499739	-0.0132345	-0.0073614	-0.0125913	0.0070879	0.0144711	-0.0036419
0.16	0.0118724	0.00818696	0.00465665	0.00876554	0.0118113	-0.00468096	-0.012915	-0.00593956	-0.0108735	0.00626929	0.0128813	-0.00446773
0.161	0.0125638	0.00750731	0.00416194	0.0165763	0.0112068	-0.00407572	-0.0125315	-0.00450673	-0.00945472	0.00478336	0.010279	-0.00497819
0.162	0.013004	0.00669027	0.00360021	0.0225207	0.0106072	-0.00315242	-0.0118603	-0.00337811	-0.00858781	0.00311679	0.00712513	-0.00504791
0.163	0.0132342	0.00571835	0.00319824	0.0265623	0.0102255	-0.00203359	-0.0107406	-0.00272504	-0.00823494	0.00165428	0.00382326	-0.00466425
0.164	0.0133804	0.00465147	0.00311619	0.0287891	0.0100992	-0.000737056	-0.00912525	-0.0024088	-0.00811918	0.000522012	0.000721683	-0.00387945
0.165	0.0136578	0.003548	0.00333527	0.0288353	0.0100911	0.000843534	-0.00701596	-0.00224369	-0.00803065	-0.000175755	-0.00181648	-0.00280093
0.166	0.014242	0.00238457	0.0036706	0.0263783	0.0100424	0.00262706	-0.00468048	-0.00226572	-0.00790778	-0.000392714	-0.00352651	-0.0014877
0.167	0.0151232	0.0011949	0.00392282	0.0215781	0.00988992	0.00436505	-0.00266711	-0.0027083	-0.00762928	-0.000230461	-0.00429892	1.85e-05
0.168	0.0161547	0.000105574	0.00401336	0.0148436	0.00961018	0.00592435	-0.00122289	-0.00363608	-0.00706943	0.000312832	-0.00412117	0.00147933
0.169	0.0171626	-0.000785859	0.00395336	0.00680912	0.00918481	0.00732176	-5.94e-05	-0.00471223	-0.00628978	0.00150648	-0.00318892	0.00252252
0.17	0.0180155	-0.00146304	0.00376671	-0.00168957	0.00868152	0.00850393	0.00113539	-0.00552797	-0.00538187	0.00355934	-0.00191054	0.00296359
0.171	0.0186263	-0.00194891	0.00346908	-0.0101439	0.00815482	0.00923364	0.00232569	-0.00592999	-0.00432198	0.00628254	-0.000727271	0.00281222
0.172	0.0189635	-0.00228495	0.00307589	-0.0186101	0.00755678	0.00934381	0.00333997	-0.00592009	-0.00312777	0.00927069	0.00013364	0.00207943
0.173	0.0190726	-0.00249828	0.00259888	-0.0271197	0.00680046	0.00889664	0.00406501	-0.00553652	-0.00193566	0.0121108	0.000759383	0.000862716
0.174	0.0189984	-0.00255582	0.00204821	-0.0350763	0.00577138	0.00802183	0.00442583	-0.00491057	-0.000797603	0.0143268	0.00115077	-0.000589195
0.175	0.018714	-0.00234151	0.00153319	-0.0415063	0.00438805	0.00691797	0.00447125	-0.0042553	0.000309816	0.0155245	0.00104647	-0.00202692
0.176	0.0181327	-0.0016875	0.00125573	-0.0456752	0.00265369	0.00589121	0.00440163	-0.00368105	0.00115228	0.015493	0.000299101	-0.00319403
0.177	0.0172287	-0.000464473	0.00131245	-0.0472304	0.000642784	0.00519169	0.00440716	-0.00313078	0.00130378	0.0140576	-0.000973414	-0.0037346
0.178	0.0161746	0.00136517	0.00164564	-0.0461196	-0.00143991	0.00484709	0.00446432	-0.00260212	0.000608804	0.011226	-0.00253051	-0.00329118
0.179	0.0152546	0.00368986	0.00217957	-0.0426263	-0.00327611	0.00465874	0.00435663	-0.00228408	-0.000722724	0.00748862	-0.00414758	-0.00166879
0.18	0.0146231	0.00624837	0.00291577	-0.0372777	-0.00458372	0.00440086	0.00397884	-0.00236697	-0.00235535	0.00350735	-0.00569646	0.00105452
0.181	0.014242	0.00873704	0.00386977	-0.0307614	-0.00526098	0.00393176	0.00351582	-0.0027927	-0.00391032	-0.000384571	-0.00702684	0.00453339
0.182	0.0140072	0.01085	0.00497622	-0.0240253	-0.00538207	0.00314522	0.00335029	-0.00324537	-0.00500913	-0.0039316	-0.00781	0.00834987
0.183	0.0138636	0.0123449	0.00612829	-0.0181691	-0.00504018	0.0019904	0.00385639	-0.00343201	-0.00547163	-0.00662973	-0.00779369	0.0120811
0.184	0.0138728	0.013149	0.00714398	-0.0140575	-0.00431828	0.000564634	0.00506447	-0.00333901	-0.00534718	-0.00802268	-0.00713279	0.0151465
0.185	0.01415	0.0132719	0.00774036	-0.0121028	-0.00339127	-0.000896233	0.00650251	-0.00315778	-0.00479941	-0.00800022	-0.00614112	0.016894
0.186	0.014677	0.0127009	0.0078059	-0.0123382	-0.0024678	-0.00220966	0.00757811	-0.00308745	-0.00412916	-0.00676516	-0.00485755	0.0169107
0.187	0.0152839	0.0114584	0.00748421	-0.0145175	-0.00165766	-0.00327901	0.00798154	-0.00319484	-0.003643	-0.00472828	-0.00320573	0.0152651
0.188	0.0158259	0.00969404	0.00696305	-0.0182564	-0.000974793	-0.00391698	0.00775106	-0.00322689	-0.00341665	-0.00242589	-0.00148773	0.0125699
0.189	0.0162479	0.00768365	0.0064182	-0.023164	-0.000421586	-0.00399344	0.0071197	-0.00256732	-0.0033388	-0.000339606	-0.000245323	0.00958759
0.19	0.0164937	0.00569439	0.00592211	-0.0287096	-6.11e-05	-0.00370872	0.00622102	-0.000627513	-0.00318801	0.00123293	0.000323912	0.00668767
0.191	0.0164778	0.00388214	0.00539271	-0.0341376	9.42e-06	-0.00332811	0.00508696	0.00270663	-0.00257179	0.00199998	0.000376998	0.0039051
0.192	0.016157	0.00230369	0.00484742	-0.0387441	-0.000238981	-0.00281143	0.0038701	0.00700164	-0.00100759	0.00160913	6.75e-06	0.00134778
0.193	0.0155384	0.000957412	0.00447273	-0.042162	-0.000680712	-0.00200885	0.0027648	0.0114212	0.0018336	9.34e-05	-0.00083794	-0.000731807
0.194	0.0146359	-9.12e-05	0.00434619	-0.0443732	-0.00109449	-0.000986425	0.00178911	0.0149764	0.00585931	-0.00188506	-0.00208597	-0.00216381
0.195	0.0135051	-0.000708564	0.00441578	-0.0455198	-0.00143058	6.4e-05	0.000869135	0.0168836	0.0103686	-0.00363307	-0.00338359	-0.00294517
0.196	0.0122695	-0.000904461	0.00472175	-0.0458647	-0.00188306	0.0010971	5.69e-05	0.0168556	0.0143017	-0.00503449	-0.00435443	-0.00315124
0.197	0.0110191	-0.000795372	0.0053278	-0.0460244	-0.00256961	0.0022038	-0.000504723	0.0151268	0.0168009	-0.00630759	-0.00493792	-0.00296871
0.198	0.00971456	-0.00045739	0.00615794	-0.0468576	-0.00336139	0.00328979	-0.000727403	0.0121354	0.0174748	-0.00744181	-0.00524759	-0.00265693
0.199	0.00829136	1.18e-05	0.00708166	-0.0488035	-0.00409823	0.00393915	-0.000589807	0.00818438	0.0163715	-0.00813968	-0.00535512	-0.00236005
0.2	0.00678627	0.000491202	0.00797336	-0.0514908	-0.00477014	0.00377499	-0.000128665	0.00356725	0.0138444	-0.00814894	-0.00533079	-0.00216338
0.201	0.00527587	0.00091851	0.00864274	-0.0540909	-0.00551267	0.00283578	0.000560024	-0.00115252	0.0103765	-0.0074169	-0.00521185	-0.0022067
0.202	0.00383295	0.00123565	0.00889596	-0.0558964	-0.00653367	0.00141962	0.00141177	-0.00535986	0.00649469	-0.00596596	-0.00493397	-0.00247938
0.203	0.00260184	0.00133059	0.00865054	-0.0565113	-0.00788251	-0.000214069	0.00243175	-0.00881349	0.00274694	-0.00387212	-0.00442801	-0.00273911
0.204	0.00175899	0.00113823	0.00793183	-0.055705	-0.00927371	-0.00182313	0.00359488	-0.0115875	-0.00037709	-0.00150303	-0.00376241	-0.00283425
0.205	0.0013766	0.000715118	0.00688176	-0.0533989	-0.0103439	-0.00323365	0.00469014	-0.0137633	-0.00265807	0.000587833	-0.00307333	-0.00289609
0.206	0.00145462	0.000165494	0.00576302	-0.0497071	-0.010955	-0.00449116	0.00534165	-0.015348	-0.0041619	0.00218731	-0.00238219	-0.00308613
0.207	0.00194764	-0.000436466	0.00479487	-0.0447487	-0.0110999	-0.00562241	0.0053535	-0.0163292	-0.00493074	0.0034105	-0.00161701	-0.00326927
0.208	0.00271611	-0.00102659	0.00404445	-0.0386214	-0.0107307	-0.00645153	0.00491785	-0.016818	-0.00486892	0.00428934	-0.000800426	-0.00318198
0.209	0.00362347	-0.00154018	0.00352075	-0.0314962	-0.00981142	-0.00693966	0.00434769	-0.0171095	-0.00398723	0.00478192	-0.000125435	-0.00285914
0.21	0.00455359	-0.00194123	0.00319167	-0.0235198	-0.00843292	-0.00731861	0.00374118	-0.0175392	-0.00261806	0.00483644	0.000194264	-0.00258746
0.211	0.00539789	-0.00220906	0.00295878	-0.0148451	-0.00681136	-0.00773612	0.0030034	-0.0182646	-0.00122772	0.00433175	0.000126056	-0.00250413
0.212	0.00615707	-0.00232965	0.00280642	-0.00563053	-0.005121	-0.00814146	0.00202631	-0.0191502	-4.77e-05	0.00330893	-0.000186469	-0.00247776
0.213	0.00686966	-0.00233475	0.00284819	0.00409642	-0.00339229	-0.00845926	0.000744595	-0.0199341	0.000903167	0.00209752	-0.000552887	-0.00229847
0.214	0.00756809	-0.00227884	0.00314691	0.0142702	-0.00172727	-0.00859109	-0.000802044	-0.0204615	0.00151666	0.000989173	-0.00078966	-0.00182767
0.215	0.00835131	-0.00209337	0.00363539	0.0245009	-0.000369027	-0.00842905	-0.0023806	-0.0207019	0.00155599	6.85e-06	-0.000674507	-0.00112672
0.216	0.0092387	-0.00154948	0.0042188	0.0341439	0.000599882	-0.00798125	-0.00369698	-0.0206167	0.000945785	-0.000857285	-2.11e-05	-0.000526644
0.217	0.010014	-0.000497702	0.00483884	0.0426199	0.00131693	-0.00731199	-0.00456996	-0.0201428	-4.56e-05	-0.00140391	0.0010158	-0.000432789
0.218	0.0103302	0.000930483	0.00535656	0.0495036	0.00192426	-0.00646761	-0.00490945	-0.0192396	-0.00105693	-0.0014611	0.00200865	-0.00097631
0.219	0.0100722	0.0024742	0.00555951	0.0542768	0.00258685	-0.00556026	-0.00470198	-0.0178907	-0.00192907	-0.00116079	0.00261684	-0.0019291
0.22	0.00962389	0.00397282	0.00538714	0.0562285	0.00351734	-0.00482684	-0.00398572	-0.0161712	-0.00254627	-0.00067634	0.00266738	-0.00301129
0.221	0.00955043	0.00531958	0.00494675	0.054828	0.00468258	-0.00459369	-0.00284401	-0.0142036	-0.00267871	0.000144576	0.00214958	-0.004061
0.222	0.0102219	0.00635094	0.00440084	0.0502181	0.00567397	-0.00503891	-0.0015453	-0.0120508	-0.00229224	0.00152168	0.00118332	-0.0048798
0.223	0.0119408	0.00692093	0.00392921	0.0432765	0.00605671	-0.00596348	-0.000494169	-0.00976955	-0.00170603	0.00318807	-4.79e-05	-0.00522658
0.224	0.0149454	0.00696395	0.00362846	0.0350747	0.00573909	-0.00697979	9.94e-05	-0.00745651	-0.00121905	0.00456228	-0.00128237	-0.00507665
0.225	0.0191196	0.00644498	0.00347853	0.0263583	0.00483685	-0.0078272	0.000356302	-0.00520259	-0.000914434	0.00557503	-0.00218947	-0.00471619
0.226	0.0240548	0.00536671	0.00346298	0.0177103	0.00339314	-0.00847723	0.0004577	-0.0031115	-0.000855819	0.00666887	-0.00246122	-0.00441175
0.227	0.0292724	0.00382357	0.00361438	0.00972114	0.00154846	-0.00906286	0.000378362	-0.00137944	-0.00105265	0.00783619	-0.00188759	-0.00416807
0.228	0.0342368	0.00202333	0.00394989	0.00265345	-0.000307781	-0.00971642	4.24e-05	-0.000157932	-0.00131589	0.00842308	-0.000436069	-0.0039445
0.229	0.0384675	0.000197246	0.00439805	-0.00360122	-0.00183148	-0.0104101	-0.000337597	0.000627353	-0.0014302	0.00806132	0.0016368	-0.00371819
0.23	0.0416987	-0.0015486	0.00480665	-0.00914275	-0.00294135	-0.01089	-0.000393948	0.00111194	-0.00136491	0.00723032	0.00385964	-0.00325738
0.231	0.0438118	-0.00312439	0.00511271	-0.0140399	-0.00360574	-0.0109645	-0.000132003	0.00132339	-0.00129923	0.00654458	0.00578803	-0.00228168
0.232	0.0447347	-0.00432473	0.00542237	-0.0186422	-0.00365307	-0.0108397	0.000115785	0.00127876	-0.00147781	0.00592493	0.00715466	-0.000914837
0.233	0.0445016	-0.00501513	0.00586566	-0.0234712	-0.00299657	-0.0108726	0.000327452	0.000996805	-0.00197528	0.00502088	0.0078761	0.000331061
0.234	0.0432771	-0.00528382	0.00646502	-0.028721	-0.00181835	-0.0111094	0.000886339	0.000411599	-0.00265499	0.0040043	0.00800035	0.00106757
0.235	0.0412296	-0.00535021	0.00713469	-0.0342313	-0.000335084	-0.0113016	0.00196988	-0.000475963	-0.00337067	0.00336351	0.00768225	0.00132052
0.236	0.0384817	-0.00538999	0.0077745	-0.0398133	0.00136213	-0.0112449	0.00322957	-0.00141577	-0.00410429	0.00324502	0.00711182	0.00127373
0.237	0.0351901	-0.00545131	0.00832771	-0.0451275	0.00312338	-0.0108764	0.00422766	-0.00206867	-0.0047936	0.00344128	0.00636354	0.000948354
0.238	0.0315583	-0.00546687	0.00878884	-0.0495961	0.00463484	-0.0101873	0.0049021	-0.00231839	-0.00517763	0.00379486	0.00537809	0.000326888
0.239	0.027762	-0.00522203	0.009201	-0.0527708	0.005562	-0.00920647	0.00543619	-0.0023362	-0.00508699	0.00431816	0.00413068	-0.000383198
0.24	0.0239752	-0.00446617	0.00958416	-0.0544287	0.00568077	-0.00794835	0.00595982	-0.00230685	-0.00464534	0.00494952	0.00270932	-0.000902804
0.241	0.0204656	-0.00318186	0.0098369	-0.0543996	0.00491905	-0.00640976	0.00646124	-0.00227662	-0.00399079	0.00537216	0.00115075	-0.00121151
0.242	0.0175011	-0.00157899	0.00978039	-0.0526807	0.0034745	-0.00470306	0.00672247	-0.00228571	-0.0031927	0.00531035	-0.000607438	-0.00142681
0.243	0.0152339	0.000113717	0.00937352	-0.0495896	0.00182892	-0.00306105	0.00645818	-0.0023426	-0.00245507	0.0049167	-0.00252341	-0.00148587
0.244	0.0137408	0.00172692	0.00876924	-0.045674	0.0004405	-0.00160001	0.00570797	-0.002385	-0.00196552	0.0045589	-0.00435784	-0.0012236
0.245	0.0129559	0.00316598	0.00812647	-0.0414862	-0.000615573	-0.000228851	0.0047678	-0.00242132	-0.0017132	0.00437326	-0.00581152	-0.00054616
0.246	0.0126191	0.00440018	0.00747233	-0.037358	-0.00168514	0.00105539	0.00375763	-0.0025114	-0.00171789	0.00433958	-0.00668381	0.000465641
0.247	0.0124952	0.00534942	0.00675671	-0.0334352	-0.00306959	0.00205161	0.0026486	-0.00260392	-0.0021769	0.00464155	-0.00690026	0.0014972
0.248	0.0125662	0.00585086	0.00595199	-0.029907	-0.0045446	0.00267961	0.00158255	-0.00253246	-0.00321562	0.00553142	-0.00641232	0.00230286
0.249	0.0129385	0.00577059	0.00510738	-0.0269319	-0.00560841	0.00312748	0.000886479	-0.00212888	-0.00459179	0.00677031	-0.00520814	0.00291874
0.25	0.0136416	0.00506966	0.00438845	-0.0243673	-0.00608758	0.00358304	0.000763414	-0.00124706	-0.00581852	0.0077049	-0.00354984	0.00343077
0.251	0.014516	0.00383832	0.00391629	-0.0218792	-0.00624553	0.00400909	0.00111038	0.000308903	-0.0065952	0.00798477	-0.00189441	0.003824
0.252	0.015341	0.00228001	0.00361853	-0.0193116	-0.0063691	0.00429501	0.00175688	0.00272675	-0.00695593	0.00773416	-0.000486085	0.00403093
0.253	0.0160348	0.000623803	0.00341423	-0.0168509	-0.00641702	0.00446436	0.0026676	0.00590092	-0.00698871	0.00701524	0.000686163	0.00390304
0.254	0.0165517	-0.00087559	0.00330045	-0.0149086	-0.00617702	0.00455253	0.00365993	0.00929322	-0.00656596	0.00563077	0.00165868	0.00328018
0.255	0.016776	-0.00194349	0.00321437	-0.0138117	-0.00561747	0.00446173	0.00415966	0.0121991	-0.00539934	0.00366774	0.00246625	0.0021989
0.256	0.0166285	-0.00241914	0.00313561	-0.0135459	-0.0048108	0.00407385	0.00370562	0.014109	-0.00334828	0.00166148	0.00316782	0.000839363
0.257	0.0161097	-0.00231168	0.0032203	-0.0138206	-0.00366666	0.00343414	0.00253119	0.0147975	-0.000515839	-0.000109912	0.00373002	-0.000655694
0.258	0.0152855	-0.00169965	0.00354967	-0.0143465	-0.00209453	0.00280008	0.0011212	0.0142636	0.00301615	-0.00188043	0.00406328	-0.00217216
0.259	0.0142735	-0.000666443	0.00397865	-0.0149126	-0.000347151	0.00246291	-0.000504718	0.0127432	0.00712765	-0.00367825	0.00415788	-0.00354852
0.26	0.0131924	0.000655452	0.00439928	-0.0151296	0.00107041	0.00246047	-0.00261636	0.0106075	0.0113081	-0.00499302	0.00402382	-0.00456026
0.261	0.0121397	0.00206691	0.00482672	-0.0142194	0.00180872	0.00253522	-0.00519487	0.00813477	0.014792	-0.00546969	0.00365239	-0.00502869
0.262	0.0112469	0.0033618	0.00520283	-0.0112287	0.00180796	0.00247153	-0.00782317	0.00542815	0.0169636	-0.00540154	0.00313861	-0.00495805
0.263	0.0106977	0.00436814	0.00539149	-0.00564527	0.00116551	0.00236311	-0.00998651	0.00261097	0.0175405	-0.00523748	0.00270075	-0.00448765
0.264	0.0106005	0.0049952	0.00530056	0.00208054	3.82e-05	0.00235329	-0.0113016	2.47e-05	0.0166887	-0.00498204	0.00251766	-0.00376379
0.265	0.0109099	0.00523501	0.00490602	0.0106063	-0.00148011	0.0021988	-0.0116522	-0.00203139	0.0148748	-0.0043014	0.00262853	-0.00288203
0.266	0.011492	0.00509672	0.00424888	0.0182844	-0.00329236	0.00147209	-0.0112643	-0.00362878	0.0124044	-0.00299137	0.00297879	-0.00189065
0.267	0.0121032	0.0046726	0.0034422	0.0237981	-0.00508794	0.000146711	-0.0103964	-0.00489296	0.00932377	-0.00122096	0.00350273	-0.000882628
0.268	0.0124187	0.00421519	0.00266621	0.0263039	-0.0064813	-0.00139938	-0.00903434	-0.00556298	0.00586289	0.000550954	0.00419257	-6.23e-05
0.269	0.0123056	0.00398102	0.00210453	0.0252465	-0.00730769	-0.00289209	-0.00712133	-0.00531346	0.00267807	0.00189863	0.00507967	0.000353517
0.27	0.0119013	0.00408191	0.00180574	0.020514	-0.00767699	-0.00445354	-0.00479732	-0.00426716	0.000420965	0.00266948	0.00618156	0.000382847
0.271	0.0113939	0.00458157	0.00168597	0.0126739	-0.0078115	-0.00631001	-0.00232733	-0.00276874	-0.000756239	0.0028385	0.00755274	0.000311984
0.272	0.0108797	0.00557037	0.00166447	0.00283213	-0.0078691	-0.00839202	1.9e-05	-0.000942222	-0.00111607	0.00239944	0.00932397	0.000282548
0.273	0.0103747	0.00698541	0.00171874	-0.00761851	-0.00789114	-0.0104436	0.00201247	0.00116324	-0.000933265	0.00160728	0.0115511	4.38e-05
0.274	0.00996811	0.00845926	0.00184013	-0.0174206	-0.00781528	-0.0122629	0.00341063	0.00324306	-0.000383406	0.000999618	0.014062	-0.000718173
0.275	0.0098032	0.0095291	0.00194938	-0.0259424	-0.00752363	-0.0136875	0.00395139	0.00490951	0.000267104	0.000888657	0.016547	-0.00194546
0.276	0.00975392	0.00991188	0.0019813	-0.0330591	-0.00696716	-0.0145698	0.00356511	0.00602874	0.000766637	0.00112506	0.018691	-0.00314692
0.277	0.00946186	0.00958501	0.00198101	-0.0387916	-0.00627175	-0.0148728	0.00254802	0.00662536	0.00119684	0.00154751	0.0202452	-0.00379686
0.278	0.00879426	0.00879851	0.00200643	-0.0433595	-0.00564631	-0.0146775	0.00132142	0.00663983	0.0017519	0.00222733	0.021091	-0.0037819
0.279	0.00795335	0.00785787	0.00211383	-0.047145	-0.00512583	-0.0139805	7.02e-05	0.00605954	0.00228023	0.00307444	0.0212525	-0.00328308
0.28	0.00723359	0.00682425	0.00237871	-0.0503988	-0.00453118	-0.0126902	-0.00117843	0.00515603	0.00242299	0.00352984	0.0209378	-0.0024329
0.281	0.00687692	0.00555252	0.0028471	-0.053206	-0.00372805	-0.0109233	-0.00225941	0.00425272	0.00204529	0.0030208	0.0204734	-0.00135784
0.282	0.00698988	0.00389785	0.00347933	-0.0556515	-0.00276186	-0.00900934	-0.00295332	0.00335804	0.00135736	0.00174254	0.0200304	-0.00024322
0.283	0.00751151	0.00186943	0.00414373	-0.0578055	-0.00171961	-0.00718434	-0.00319053	0.0023188	0.000702335	0.000486081	0.0194971	0.000818107
0.284	0.00833485	-0.000330721	0.00478004	-0.0596544	-0.000593402	-0.00552658	-0.0029753	0.00116724	0.00024033	-0.000260895	0.0186538	0.00184054
0.285	0.00943919	-0.00241759	0.00542644	-0.0613146	0.000638916	-0.00413424	-0.0023131	5.83e-05	-0.000124925	-0.000471171	0.0173712	0.00286128
0.286	0.0108719	-0.00410302	0.00604629	-0.0631598	0.00192042	-0.00310038	-0.00124185	-0.000949759	-0.000552605	-0.000190352	0.0156509	0.00383237
0.287	0.0126767	-0.00510843	0.00651701	-0.0655354	0.00313647	-0.0023763	3.5e-05	-0.00179053	-0.00109061	0.000480898	0.0135742	0.00453526
0.288	0.0148328	-0.0052321	0.0067087	-0.0684063	0.00412548	-0.00184837	0.00107478	-0.00230607	-0.00161155	0.00122883	0.0112658	0.00484396
0.289	0.0172466	-0.00445316	0.00654482	-0.0711774	0.0047316	-0.0014013	0.00163156	-0.00243319	-0.00200095	0.00171114	0.00888795	0.00497742
0.29	0.0199327	-0.00293713	0.00605482	-0.0729532	0.00483933	-0.000892003	0.00216562	-0.00224674	-0.00243181	0.00191802	0.00651382	0.00522773
0.291	0.0231949	-0.000917686	0.00533554	-0.0729036	0.00442603	-0.000220224	0.00356608	-0.00183316	-0.00310246	0.00200948	0.00405602	0.00560691
0.292	0.0275548	0.00142894	0.00453778	-0.0702839	0.00362595	0.000652052	0.00650384	-0.00116416	-0.00383054	0.00196226	0.00149201	0.00596596
0.293	0.0334913	0.00409137	0.00391853	-0.064758	0.00256642	0.0016978	0.0114519	-9e-05	-0.00426182	0.00180962	-0.000976143	0.006412
0.294	0.0412229	0.0072768	0.00368607	-0.0567039	0.00133044	0.00278487	0.0190774	0.00149273	-0.00425997	0.00187869	-0.00307477	0.00743038
0.295	0.0507104	0.0113905	0.00379	-0.0466213	0.000165976	0.00379739	0.0300247	0.00359674	-0.00395856	0.00245233	-0.00462618	0.00947398
0.296	0.0617681	0.0169924	0.00405976	-0.034578	-0.000644748	0.00472675	0.044356	0.00620194	-0.00354618	0.00338561	-0.00552564	0.0126573
0.297	0.0740949	0.0246114	0.0044203	-0.020467	-0.00103953	0.00555064	0.0615559	0.00919187	-0.00302586	0.00424698	-0.00572535	0.0170167
0.298	0.087262	0.0344603	0.00485908	-0.00435344	-0.00113557	0.00616739	0.0808453	0.0123317	-0.00233352	0.00489254	-0.00530804	0.0227886
0.299	0.100711	0.0463711	0.00532656	0.0135422	-0.00112557	0.00656975	0.101265	0.0153407	-0.00159614	0.00557738	-0.00437736	0.0303944
0.3	0.113914	0.0599254	0.00575952	0.0329349	-0.00115244	0.00699866	0.121791	0.0179398	-0.000948761	0.00631269	-0.00297213	0.0403071
0.301	0.126704	0.0745825	0.00611526	0.0533428	-0.00122017	0.0078014	0.141512	0.0198721	-0.000288887	0.00668178	-0.00125021	0.0528651
0.302	0.13942	0.0899136	0.00632889	0.0740251	-0.00125732	0.00937066	0.15988	0.0209206	0.000546568	0.00651855	0.000566444	0.0681693
0.303	0.152918	0.105898	0.00638748	0.0943848	-0.0011701	0.0123517	0.177167	0.0209907	0.00159395	0.00617937	0.00237129	0.0860284
0.304	0.168485	0.123028	0.00645139	0.114366	-0.000897826	0.0175482	0.194675	0.0201734	0.00283453	0.00605525	0.00408216	0.105811
0.305	0.187522	0.142179	0.00671818	0.134247	-0.00044687	0.0255561	0.214244	0.0187739	0.00424783	0.00625064	0.00566895	0.126445
0.306	0.21131	0.164274	0.00721146	0.154153	0.000229764	0.0365816	0.237461	0.0173055	0.00581491	0.00672547	0.00723956	0.146903
0.307	0.240714	0.189965	0.00782427	0.174066	0.00125497	0.0503713	0.26519	0.0162433	0.00762	0.00756484	0.00897225	0.166856
0.308	0.275724	0.219523	0.00845461	0.194341	0.00271937	0.0662088	0.297581	0.0158581	0.0099109	0.00894481	0.0112211	0.187002
0.309	0.315569	0.252806	0.00913464	0.215877	0.0046888	0.0831029	0.334246	0.0164257	0.0130073	0.0108099	0.0147431	0.208971
0.31	0.359332	0.289168	0.0102319	0.239757	0.00730978	0.100177	0.374302	0.0184424	0.0173383	0.0130736	0.0206663	0.234822
0.311	0.406231	0.327526	0.0124768	0.266732	0.0109695	0.116972	0.416525	0.0225837	0.0236814	0.016359	0.0302265	0.266398
0.312	0.455663	0.366646	0.0167381	0.296737	0.0164023	0.133439	0.459635	0.0295317	0.033051	0.0219469	0.0444696	0.304855
0.313	0.507406	0.405405	0.0237793	0.329059	0.0245791	0.149986	0.502337	0.0398337	0.0462182	0.0307397	0.0638433	0.350474
0.314	0.561766	0.442943	0.0340928	0.362893	0.036251	0.167613	0.54338	0.0537914	0.0634001	0.0429803	0.0879143	0.402631
0.315	0.619411	0.478831	0.0477807	0.39741	0.0513527	0.187702	0.581867	0.0712326	0.0841457	0.0592459	0.115475	0.459977
0.316	0.680974	0.513235	0.0644836	0.431904	0.0690332	0.211507	0.617431	0.0912952	0.107453	0.0806627	0.144828	0.521045
0.317	0.746669	0.546927	0.0834416	0.466044	0.0882597	0.239648	0.649965	0.112635	0.132061	0.107333	0.174282	0.584704
0.318	0.815997	0.581084	0.103684	0.499656	0.108101	0.271864	0.679095	0.133934	0.156563	0.13734	0.202734	0.649875
0.319	0.887546	0.616925	0.124337	0.532556	0.127638	0.307284	0.704243	0.154296	0.179664	0.168176	0.229983	0.715263
0.32	0.9592	0.655348	0.144972	0.5647	0.145969	0.344916	0.725228	0.173454	0.200937	0.198561	0.256772	0.779697
0.321	1.02873	0.696742	0.165673	0.596059	0.162599	0.383748	0.742341	0.191781	0.221357	0.228292	0.284522	0.842447
0.322	1.09416	0.740974	0.186859	0.626291	0.177933	0.422651	0.755992	0.210192	0.242946	0.257335	0.314715	0.903045
0.323	1.15395	0.787449	0.209223	0.654992	0.193181	0.460543	0.766664	0.229995	0.267705	0.286033	0.34833	0.96098
0.324	1.20736	0.835236	0.233583	0.682165	0.209858	0.496618	0.774904	0.252568	0.297031	0.315664	0.385634	1.0156
0.325	1.25468	0.883199	0.260484	0.707932	0.229383	0.530398	0.781169	0.278831	0.331993	0.348076	0.426299	1.06626
0.326	1.29706	0.930114	0.289998	0.731991	0.252763	0.561558	0.785804	0.308845	0.373105	0.384921	0.469659	1.11257
0.327	1.33575	0.974889	0.321793	0.753689	0.28041	0.589755	0.788834	0.342076	0.419681	0.427115	0.514938	1.15433
0.328	1.37061	1.01678	0.355236	0.772403	0.312151	0.614752	0.789348	0.37807	0.470168	0.474486	0.561352	1.19129
0.329	1.39887	1.05546	0.389568	0.787767	0.347259	0.636632	0.784965	0.416486	0.523095	0.525971	0.608192	1.22316
0.33	1.41512	1.09099	0.424126	0.799528	0.384553	0.655762	0.771881	0.456531	0.577284	0.580303	0.654972	1.24978
0.331	1.41273	1.12335	0.45837	0.807186	0.42272	0.67249	0.745514	0.496934	0.631389	0.636511	0.701335	1.2712
0.332	1.38592	1.15155	0.49186	0.809894	0.460672	0.687007	0.701646	0.536517	0.683939	0.693992	0.746792	1.28754
0.333	1.33143	1.17266	0.524454	0.806019	0.497598	0.69945	0.637687	0.574541	0.733884	0.752219	0.790702	1.29885
0.334	1.24883	1.18214	0.556333	0.792092	0.532788	0.709827	0.553495	0.610605	0.78065	0.810396	0.832455	1.30474
0.335	1.14006	1.17514	0.587805	0.763195	0.565588	0.717923	0.451557	0.644379	0.823676	0.867518	0.871547	1.30381
0.336	1.00868	1.14778	0.619208	0.715241	0.595528	0.723443	0.33658	0.675422	0.862241	0.922622	0.907691	1.29311
0.337	0.859456	1.09815	0.650813	0.646853	0.622404	0.726066	0.214551	0.703267	0.895837	0.974896	0.940761	1.26866
0.338	0.698056	1.02659	0.68282	0.559817	0.646208	0.724984	0.091571	0.727672	0.924446	1.02375	0.970509	1.22661
0.339	0.530396	0.935004	0.715408	0.458432	0.667136	0.718108	-0.0271782	0.74869	0.948182	1.06874	0.99652	1.1643
0.34	0.361777	0.826275	0.74859	0.348369	0.685684	0.701709	-0.138005	0.766424	0.966899	1.1094	1.01839	1.08096
0.341	0.196214	0.703901	0.782115	0.235546	0.702448	0.67126	-0.238773	0.780883	0.980564	1.14505	1.0357	0.978309
0.342	0.0363636	0.571711	0.81546	0.125255	0.71772	0.623292	-0.328934	0.792166	0.989587	1.17496	1.04787	0.860301
0.343	-0.116097	0.433412	0.847775	0.0216205	0.731436	0.556809	-0.409293	0.800431	0.994361	1.1986	1.05434	0.732287
0.344	-0.260065	0.292206	0.878071	-0.0727901	0.743504	0.473454	-0.481128	0.805677	0.994798	1.21586	1.0544	0.5999
0.345	-0.39474	0.150574	0.905468	-0.157165	0.753915	0.377076	-0.54536	0.807696	0.99048	1.22666	1.04672	0.468106
0.346	-0.519369	0.0103478	0.929188	-0.232297	0.76238	0.273125	-0.602265	0.805994	0.98081	1.23059	1.0288	0.340645
0.347	-0.633058	-0.126806	0.948268	-0.30017	0.767876	0.167589	-0.651504	0.79942	0.964415	1.22686	0.996891	0.21978
0.348	-0.734704	-0.25913	0.961027	-0.363348	0.768227	0.0658565	-0.692345	0.785573	0.938282	1.21371	0.946741	0.106194
0.349	-0.823084	-0.384902	0.964553	-0.424085	0.759797	-0.0279909	-0.724025	0.760842	0.897773	1.1873	0.875017	-0.000791576
0.35	-0.89706	-0.502431	0.954809	-0.483518	0.738009	-0.111635	-0.746001	0.721765	0.837883	1.14159	0.780544	-0.102346
0.351	-0.955775	-0.610076	0.927702	-0.541429	0.698709	-0.184746	-0.758036	0.666536	0.754965	1.07024	0.664742	-0.199015
0.352	-0.998727	-0.706484	0.880598	-0.596854	0.639606	-0.248754	-0.76039	0.595399	0.648194	0.968931	0.531483	-0.290172
0.353	-1.02572	-0.790713	0.813261	-0.648993	0.561188	-0.306054	-0.753933	0.510166	0.520378	0.836671	0.386493	-0.374301
0.354	-1.03688	-0.862092	0.727817	-0.697136	0.466573	-0.359052	-0.739918	0.41366	0.377291	0.676128	0.236337	-0.449591
0.355	-1.0329	-0.920063	0.62806	-0.740008	0.360581	-0.409631	-0.719758	0.309374	0.225889	0.493606	0.0874302	-0.514257
0.356	-1.0153	-0.964368	0.518609	-0.776126	0.248745	-0.458781	-0.695093	0.200988	0.073142	0.297999	-0.0548403	-0.566608
0.357	-0.98613	-0.995337	0.404212	-0.804726	0.136463	-0.506298	-0.667829	0.091841	-0.074442	0.098988	-0.186932	-0.605136
0.358	-0.947731	-1.01391	0.289103	-0.826005	0.028257	-0.551054	-0.639924	-0.0153876	-0.211682	-0.0944276	-0.307378	-0.628903
0.359	-0.902539	-1.02152	0.176473	-0.84065	-0.0727592	-0.591648	-0.612985	-0.118954	-0.335825	-0.274756	-0.416457	-0.638
0.36	-0.852766	-1.01991	0.068296	-0.849524	-0.165176	-0.626911	-0.588037	-0.21818	-0.446732	-0.436627	-0.515598	-0.63349
0.361	-0.800253	-1.01097	-0.0347333	-0.853761	-0.249177	-0.656023	-0.565708	-0.313066	-0.545918	-0.577648	-0.606408	-0.617163
0.362	-0.746592	-0.996502	-0.13302	-0.854728	-0.32584	-0.678366	-0.546447	-0.403524	-0.635489	-0.698751	-0.689767	-0.591405
0.363	-0.693197	-0.978152	-0.227342	-0.853606	-0.396284	-0.69346	-0.530379	-0.489025	-0.717373	-0.802849	-0.765754	-0.55894
0.364	-0.641246	-0.957239	-0.318231	-0.851183	-0.461273	-0.701209	-0.517207	-0.568836	-0.792605	-0.892663	-0.833866	-0.522515
0.365	-0.591663	-0.934768	-0.405819	-0.848183	-0.521149	-0.702205	-0.506483	-0.641999	-0.861001	-0.969758	-0.892729	-0.484699
0.366	-0.545112	-0.911664	-0.489803	-0.845342	-0.575756	-0.697663	-0.497892	-0.706985	-0.921429	-1.03503	-0.940304	-0.447733
0.367	-0.501967	-0.888902	-0.569522	-0.843281	-0.624498	-0.689066	-0.491312	-0.761815	-0.972269	-1.08904	-0.974773	-0.41339
0.368	-0.462394	-0.86733	-0.644107	-0.842615	-0.666644	-0.677963	-0.486647	-0.804604	-1.01162	-1.13161	-0.994994	-0.382927
0.369	-0.426347	-0.847457	-0.712635	-0.843837	-0.7015	-0.665752	-0.483563	-0.833932	-1.0375	-1.16171	-1.0007	-0.357048
0.37	-0.393538	-0.829419	-0.774266	-0.846977	-0.728497	-0.653453	-0.481546	-0.84905	-1.04858	-1.17832	-0.99256	-0.335944
0.371	-0.363512	-0.81315	-0.828336	-0.851581	-0.747569	-0.641804	-0.480212	-0.850163	-1.04475	-1.18106	-0.972053	-0.319522
0.372	-0.335752	-0.798535	-0.874396	-0.856989	-0.759337	-0.631398	-0.479377	-0.838464	-1.02682	-1.17004	-0.941143	-0.307484
0.373	-0.309847	-0.785342	-0.912249	-0.862544	-0.76486	-0.622668	-0.478821	-0.815821	-0.99607	-1.1458	-0.902049	-0.299304
0.374	-0.28562	-0.773219	-0.942019	-0.867606	-0.765455	-0.615885	-0.478206	-0.784476	-0.954524	-1.10973	-0.85707	-0.294286
0.375	-0.263138	-0.761854	-0.964234	-0.871509	-0.762607	-0.611071	-0.477272	-0.746852	-0.904895	-1.0641	-0.80855	-0.291599
0.376	-0.24263	-0.751084	-0.979762	-0.873658	-0.757679	-0.607961	-0.475995	-0.70536	-0.850029	-1.01136	-0.758818	-0.290328
0.377	-0.224326	-0.740765	-0.989631	-0.873777	-0.75171	-0.606284	-0.474498	-0.662403	-0.79261	-0.953666	-0.71002	-0.289679
0.378	-0.208366	-0.730579	-0.994949	-0.872046	-0.745486	-0.605956	-0.472816	-0.620323	-0.73519	-0.893431	-0.663918	-0.289079
0.379	-0.19478	-0.720146	-0.996874	-0.868856	-0.739582	-0.606822	-0.470763	-0.580982	-0.680051	-0.83337	-0.621695	-0.28816
0.38	-0.183424	-0.709201	-0.996447	-0.864421	-0.734355	-0.608473	-0.468147	-0.54554	-0.62887	-0.7756	-0.583889	-0.286856
0.381	-0.173973	-0.697536	-0.994432	-0.858806	-0.730051	-0.610404	-0.464994	-0.514727	-0.582565	-0.721229	-0.550621	-0.285408
0.382	-0.166015	-0.685032	-0.99134	-0.852256	-0.72689	-0.612154	-0.461322	-0.489023	-0.541512	-0.670948	-0.521824	-0.284059
0.383	-0.159171	-0.671679	-0.987599	-0.845143	-0.724971	-0.613419	-0.456947	-0.468444	-0.505862	-0.625529	-0.497209	-0.282868
0.384	-0.153192	-0.657584	-0.983645	-0.837585	-0.724136	-0.614189	-0.451773	-0.452401	-0.475654	-0.585418	-0.476297	-0.281753
0.385	-0.147935	-0.643102	-0.979761	-0.829605	-0.724056	-0.61458	-0.445983	-0.440098	-0.450767	-0.550255	-0.458598	-0.280519
0.386	-0.143273	-0.628656	-0.975976	-0.821708	-0.72448	-0.614529	-0.43983	-0.430934	-0.430774	-0.51939	-0.443636	-0.278982
0.387	-0.139029	-0.61443	-0.972239	-0.814603	-0.725288	-0.613834	-0.433434	-0.424321	-0.414769	-0.492816	-0.430892	-0.277181
0.388	-0.134999	-0.600406	-0.968579	-0.808216	-0.726322	-0.612394	-0.426879	-0.419378	-0.401623	-0.470965	-0.419872	-0.275271
0.389	-0.131003	-0.586506	-0.965072	-0.801605	-0.727347	-0.610103	-0.42053	-0.415228	-0.390515	-0.453612	-0.410223	-0.273343
0.39	-0.126931	-0.572667	-0.961716	-0.79385	-0.728191	-0.606718	-0.414828	-0.411455	-0.381005	-0.439711	-0.401639	-0.271441
0.391	-0.122734	-0.558901	-0.95834	-0.78439	-0.728781	-0.602092	-0.409735	-0.407934	-0.372761	-0.428309	-0.393745	-0.269499
0.392	-0.118392	-0.54535	-0.954646	-0.772788	-0.729055	-0.596355	-0.404857	-0.40441	-0.365498	-0.418929	-0.386232	-0.267366
0.393	-0.113936	-0.532239	-0.950371	-0.758912	-0.72889	-0.589753	-0.39999	-0.400548	-0.358966	-0.411067	-0.378956	-0.264954
0.394	-0.109442	-0.519722	-0.945334	-0.743201	-0.728133	-0.582477	-0.395146	-0.396218	-0.352899	-0.404004	-0.371871	-0.262196
0.395	-0.104982	-0.507831	-0.939344	-0.726362	-0.726744	-0.574691	-0.390339	-0.391568	-0.347081	-0.397262	-0.364917	-0.259087
0.396	-0.100709	-0.496563	-0.932258	-0.708819	-0.724723	-0.566592	-0.385507	-0.38691	-0.34136	-0.390626	-0.357946	-0.255724
0.397	-0.0968543	-0.485862	-0.924093	-0.690605	-0.721868	-0.558541	-0.380492	-0.382463	-0.33566	-0.383808	-0.350835	-0.252158
0.398	-0.093553	-0.47568	-0.914955	-0.671861	-0.717877	-0.55105	-0.375181	-0.378197	-0.330004	-0.376636	-0.343626	-0.248436
0.399	-0.0907419	-0.466071	-0.904893	-0.653201	-0.712677	-0.544378	-0.369613	-0.373941	-0.32445	-0.369268	-0.336429	-0.244692
0.4	-0.0882534	-0.456989	-0.893908	-0.635273	-0.706438	-0.538359	-0.36381	-0.36954	-0.319	-0.36187	-0.329356	-0.241052
0.401	-0.0860386	-0.448153	-0.882101	-0.618305	-0.699355	-0.532696	-0.35779	-0.365003	-0.313526	-0.354388	-0.32253	-0.237537
0.402	-0.0841708	-0.439265	-0.869738	-0.602305	-0.691559	-0.527201	-0.351684	-0.360484	-0.307803	-0.346612	-0.316045	-0.234154
0.403	-0.0826781	-0.430138	-0.857133	-0.587264	-0.683199	-0.521734	-0.3456	-0.355917	-0.301737	-0.338453	-0.309927	-0.230993
0.404	-0.0816075	-0.420701	-0.844531	-0.573132	-0.674443	-0.516108	-0.339502	-0.350964	-0.295558	-0.330154	-0.304166	-0.228145
0.405	-0.0810037	-0.411023	-0.832066	-0.559939	-0.665521	-0.510263	-0.333354	-0.345522	-0.28966	-0.321953	-0.298885	-0.225642
0.406	-0.0806976	-0.401298	-0.819726	-0.547647	-0.65672	-0.504268	-0.327283	-0.339811	-0.284286	-0.313884	-0.294309	-0.223486
0.407	-0.0804109	-0.391712	-0.807378	-0.535774	-0.648173	-0.497999	-0.321465	-0.333926	-0.279412	-0.306086	-0.290402	-0.221576
0.408	-0.0800183	-0.382322	-0.79488	-0.523809	-0.639803	-0.491113	-0.316021	-0.327809	-0.274823	-0.298793	-0.286827	-0.219722
0.409	-0.0795058	-0.373135	-0.782188	-0.51182	-0.631536	-0.483535	-0.31102	-0.321632	-0.270371	-0.292071	-0.283306	-0.217792
0.41	-0.0788535	-0.364109	-0.769386	-0.500175	-0.62347	-0.475704	-0.306375	-0.315738	-0.266167	-0.285912	-0.279736	-0.215724
0.411	-0.078107	-0.355076	-0.756544	-0.489046	-0.615818	-0.468103	-0.301924	-0.31022	-0.262328	-0.280479	-0.275975	-0.21349
0.412	-0.07735	-0.345981	-0.743537	-0.478432	-0.608573	-0.460726	-0.29768	-0.304893	-0.258723	-0.275886	-0.271826	-0.21106
0.413	-0.0765722	-0.33699	-0.730223	-0.468395	-0.601406	-0.453275	-0.293757	-0.299678	-0.255257	-0.271811	-0.267302	-0.208416
0.414	-0.0757039	-0.328236	-0.716636	-0.459205	-0.594013	-0.445729	-0.290122	-0.294871	-0.252115	-0.267794	-0.26261	-0.205649
0.415	-0.0746926	-0.31978	-0.702841	-0.451346	-0.586282	-0.438454	-0.286506	-0.290761	-0.249404	-0.263818	-0.25783	-0.202949
0.416	-0.0734976	-0.31169	-0.688887	-0.44523	-0.57815	-0.431725	-0.282627	-0.287099	-0.246842	-0.260079	-0.252937	-0.200388
0.417	-0.0721127	-0.303958	-0.674895	-0.440901	-0.569484	-0.425514	-0.278477	-0.283417	-0.24409	-0.256332	-0.247949	-0.197924
0.418	-0.0705739	-0.296518	-0.661054	-0.438263	-0.56022	-0.419762	-0.274231	-0.279667	-0.241137	-0.252111	-0.242888	-0.195555
0.419	-0.0689015	-0.289324	-0.647579	-0.437157	-0.550492	-0.414477	-0.269892	-0.276021	-0.238104	-0.247469	-0.237871	-0.193261
0.42	-0.0671296	-0.282356	-0.634566	-0.436988	-0.540509	-0.409502	-0.265374	-0.272251	-0.234931	-0.242869	-0.233094	-0.190967
0.421	-0.0653386	-0.27565	-0.621943	-0.436849	-0.530474	-0.404567	-0.260757	-0.267894	-0.231387	-0.238479	-0.228649	-0.188637
0.422	-0.0635818	-0.269267	-0.609584	-0.435968	-0.520581	-0.399553	-0.25617	-0.262912	-0.22735	-0.234082	-0.224556	-0.186239
0.423	-0.0618611	-0.263185	-0.597451	-0.433638	-0.510997	-0.394378	-0.251661	-0.257709	-0.222969	-0.22958	-0.220803	-0.183689
0.424	-0.0601682	-0.257239	-0.585638	-0.42919	-0.501872	-0.388857	-0.247242	-0.252577	-0.218375	-0.225049	-0.21728	-0.180988
0.425	-0.0585637	-0.251249	-0.574268	-0.422318	-0.493245	-0.382951	-0.242869	-0.247527	-0.213524	-0.220457	-0.213839	-0.178209
0.426	-0.0571974	-0.245148	-0.563454	-0.413249	-0.485028	-0.376847	-0.238561	-0.242573	-0.208616	-0.215807	-0.210453	-0.175369
0.427	-0.0561856	-0.238866	-0.553266	-0.402674	-0.477241	-0.370705	-0.234505	-0.237774	-0.204201	-0.211415	-0.207228	-0.1725
0.428	-0.0555473	-0.232334	-0.543594	-0.391426	-0.470031	-0.364485	-0.230802	-0.233129	-0.200613	-0.207641	-0.204239	-0.169689
0.429	-0.055235	-0.225564	-0.53421	-0.380138	-0.46344	-0.358047	-0.227269	-0.228609	-0.197721	-0.204456	-0.201432	-0.166934
0.43	-0.0551534	-0.218562	-0.525009	-0.369395	-0.457287	-0.351447	-0.223647	-0.224256	-0.195339	-0.201667	-0.198754	-0.164203
0.431	-0.0552079	-0.211301	-0.516	-0.359862	-0.451219	-0.34499	-0.219801	-0.220079	-0.193396	-0.199305	-0.196246	-0.161578
0.432	-0.0553063	-0.203847	-0.507115	-0.351986	-0.444891	-0.338847	-0.215725	-0.21592	-0.191695	-0.19736	-0.193911	-0.159159
0.433	-0.0553176	-0.196424	-0.498221	-0.345882	-0.438225	-0.332916	-0.211511	-0.21166	-0.189917	-0.195448	-0.191592	-0.156873
0.434	-0.05501	-0.189307	-0.489245	-0.341539	-0.431447	-0.327201	-0.207224	-0.207306	-0.187778	-0.193034	-0.189117	-0.154591
0.435	-0.054026	-0.182725	-0.480227	-0.338746	-0.424821	-0.321878	-0.202842	-0.202667	-0.185167	-0.189873	-0.186422	-0.152289
0.436	-0.0520974	-0.176775	-0.471288	-0.336972	-0.418413	-0.317032	-0.198444	-0.197287	-0.18215	-0.186137	-0.183513	-0.14998
0.437	-0.0491685	-0.171313	-0.462467	-0.335558	-0.4121	-0.312641	-0.194253	-0.190988	-0.178712	-0.182153	-0.180474	-0.147661
0.438	-0.0452391	-0.166053	-0.45371	-0.333872	-0.40577	-0.308601	-0.190483	-0.184168	-0.174763	-0.178101	-0.177438	-0.145397
0.439	-0.0403391	-0.160832	-0.445022	-0.331388	-0.399405	-0.304744	-0.187285	-0.177401	-0.170504	-0.174034	-0.174455	-0.143291
0.44	-0.0346221	-0.155641	-0.436457	-0.327842	-0.39297	-0.300922	-0.184642	-0.171032	-0.166448	-0.170041	-0.171514	-0.141353
0.441	-0.0283752	-0.150478	-0.427953	-0.32325	-0.3864	-0.297002	-0.182279	-0.165112	-0.163002	-0.166229	-0.168665	-0.139483
0.442	-0.0220158	-0.145346	-0.419342	-0.317747	-0.379725	-0.292773	-0.179919	-0.159643	-0.160261	-0.162628	-0.165886	-0.137599
0.443	-0.0161018	-0.140336	-0.410542	-0.311428	-0.373084	-0.288079	-0.177507	-0.154872	-0.15816	-0.159221	-0.163083	-0.135646
0.444	-0.0111588	-0.135689	-0.401581	-0.304291	-0.366559	-0.283114	-0.175105	-0.151081	-0.156579	-0.156027	-0.16038	-0.133464
0.445	-0.00747584	-0.131747	-0.392556	-0.296393	-0.36016	-0.278237	-0.172742	-0.148281	-0.155356	-0.153037	-0.158013	-0.13094
0.446	-0.00524414	-0.128731	-0.383601	-0.288021	-0.353901	-0.2735	-0.170339	-0.146442	-0.154244	-0.15009	-0.15599	-0.128225
0.447	-0.00460987	-0.126637	-0.374812	-0.279554	-0.347706	-0.268621	-0.167719	-0.145735	-0.152906	-0.146996	-0.154152	-0.125539
0.448	-0.00545758	-0.125346	-0.366231	-0.271231	-0.341378	-0.26346	-0.164782	-0.146255	-0.151118	-0.143702	-0.152312	-0.123006
0.449	-0.00738457	-0.124764	-0.357813	-0.262599	-0.334832	-0.258385	-0.161685	-0.147649	-0.148873	-0.140392	-0.150309	-0.120674
0.45	-0.00988672	-0.124779	-0.349554	-0.252016	-0.328294	-0.253961	-0.158683	-0.149306	-0.146168	-0.137404	-0.148067	-0.118501
0.451	-0.0125787	-0.125178	-0.341665	-0.23805	-0.322073	-0.250291	-0.155854	-0.150767	-0.142885	-0.134824	-0.145588	-0.116465
0.452	-0.0152488	-0.125679	-0.334337	-0.221475	-0.316183	-0.247006	-0.153144	-0.15186	-0.139027	-0.132485	-0.142906	-0.114575
0.453	-0.017729	-0.126045	-0.32751	-0.204842	-0.31037	-0.243754	-0.150477	-0.152534	-0.134804	-0.13036	-0.140033	-0.112788
0.454	-0.0198906	-0.126102	-0.321021	-0.190574	-0.304526	-0.240409	-0.147856	-0.152665	-0.130421	-0.128527	-0.136938	-0.111102
0.455	-0.0216914	-0.125647	-0.314758	-0.179732	-0.298886	-0.23692	-0.145589	-0.152152	-0.125968	-0.126889	-0.133644	-0.10961
0.456	-0.023145	-0.124506	-0.30864	-0.171892	-0.293666	-0.233102	-0.14411	-0.151101	-0.121466	-0.125277	-0.1303	-0.108282
0.457	-0.02432	-0.122722	-0.302544	-0.165839	-0.288762	-0.228702	-0.143464	-0.149695	-0.116964	-0.12366	-0.127149	-0.106897
0.458	-0.0252927	-0.120471	-0.296375	-0.16029	-0.284044	-0.223686	-0.143315	-0.147962	-0.112688	-0.122124	-0.124377	-0.105314
0.459	-0.026101	-0.117886	-0.290185	-0.153893	-0.279548	-0.218259	-0.143384	-0.145762	-0.108939	-0.120717	-0.122054	-0.103601
0.46	-0.026787	-0.115079	-0.284045	-0.14527	-0.275303	-0.212661	-0.143537	-0.142997	-0.105818	-0.119408	-0.120216	-0.10186
0.461	-0.02744	-0.11212	-0.27796	-0.133861	-0.271225	-0.20707	-0.143582	-0.139805	-0.103315	-0.118193	-0.118746	-0.100069
0.462	-0.0281376	-0.109017	-0.272013	-0.12041	-0.267189	-0.201711	-0.14327	-0.136448	-0.101577	-0.117094	-0.117317	-0.0981713
0.463	-0.0287769	-0.105844	-0.266346	-0.106465	-0.263028	-0.196978	-0.142428	-0.133016	-0.100796	-0.116185	-0.115623	-0.0962707
0.464	-0.0291155	-0.102781	-0.260952	-0.0938912	-0.2585	-0.193245	-0.14099	-0.129492	-0.100934	-0.115601	-0.113666	-0.0946339
0.465	-0.0290458	-0.100022	-0.255669	-0.0844637	-0.253438	-0.190579	-0.139029	-0.12604	-0.101627	-0.115254	-0.11173	-0.0934419
0.466	-0.0286301	-0.0976674	-0.250378	-0.0792567	-0.247886	-0.188759	-0.136754	-0.122985	-0.102411	-0.114663	-0.110078	-0.0926774
0.467	-0.0279171	-0.0957033	-0.245081	-0.078464	-0.242095	-0.187519	-0.134359	-0.120619	-0.103003	-0.113373	-0.108781	-0.0922435
0.468	-0.026923	-0.0940863	-0.239874	-0.0818299	-0.23634	-0.186716	-0.131908	-0.118893	-0.103308	-0.111404	-0.107754	-0.0921056
0.469	-0.0257062	-0.092806	-0.234889	-0.0888161	-0.230767	-0.18627	-0.129469	-0.117275	-0.103183	-0.109052	-0.106885	-0.0923195
0.47	-0.0243449	-0.0918337	-0.230235	-0.0985414	-0.225587	-0.186086	-0.127255	-0.115319	-0.102436	-0.106468	-0.106092	-0.0929474
0.471	-0.0229244	-0.0910615	-0.226001	-0.110038	-0.221219	-0.186182	-0.125439	-0.113147	-0.100964	-0.103752	-0.105281	-0.0939446
0.472	-0.0215495	-0.0904191	-0.222236	-0.122346	-0.217957	-0.186672	-0.123978	-0.111039	-0.0988123	-0.101193	-0.104423	-0.0951258
0.473	-0.0202759	-0.0899773	-0.218897	-0.134352	-0.215694	-0.18746	-0.1229	-0.108961	-0.0961519	-0.0990642	-0.103582	-0.0962923
0.474	-0.0190455	-0.0897754	-0.215856	-0.144893	-0.214163	-0.188225	-0.122508	-0.106754	-0.0930704	-0.0974289	-0.102777	-0.0973281
0.475	-0.017769	-0.0897034	-0.212909	-0.153083	-0.213205	-0.18879	-0.123032	-0.104511	-0.089584	-0.0962438	-0.101931	-0.0980726
0.476	-0.0164717	-0.0896682	-0.209843	-0.158574	-0.212719	-0.189164	-0.124349	-0.102558	-0.0859069	-0.0954639	-0.100994	-0.0983259
0.477	-0.0152885	-0.0896755	-0.206594	-0.161631	-0.212588	-0.189289	-0.126252	-0.101092	-0.0824745	-0.0950251	-0.100007	-0.0980641
0.478	-0.0143253	-0.0897185	-0.203274	-0.162851	-0.212666	-0.189107	-0.128675	-0.100084	-0.0797127	-0.0947686	-0.0990082	-0.0973832
0.479	-0.0136238	-0.0897806	-0.200092	-0.16272	-0.212706	-0.188715	-0.131506	-0.0995232	-0.0778846	-0.0945104	-0.0979176	-0.0963364
0.48	-0.0132389	-0.0899153	-0.197197	-0.161671	-0.212446	-0.188285	-0.134443	-0.0994092	-0.0770613	-0.094188	-0.0966299	-0.0949997
0.481	-0.0132103	-0.0901676	-0.194551	-0.160432	-0.211761	-0.187991	-0.137154	-0.0995176	-0.0770501	-0.0938141	-0.0951383	-0.0935317
0.482	-0.013438	-0.090503	-0.192144	-0.1598	-0.210666	-0.187966	-0.139477	-0.099512	-0.0775319	-0.0932928	-0.0935197	-0.0921203
0.483	-0.013696	-0.0909247	-0.190154	-0.160136	-0.209268	-0.188267	-0.141374	-0.09924	-0.0784183	-0.0923946	-0.0918587	-0.090942
0.484	-0.0138355	-0.091509	-0.188682	-0.16132	-0.207623	-0.188981	-0.142752	-0.0987107	-0.0797753	-0.0910763	-0.0902259	-0.0900831
0.485	-0.0138491	-0.0922683	-0.187597	-0.163008	-0.205649	-0.190206	-0.143611	-0.0979169	-0.0814324	-0.089742	-0.0887151	-0.0894666
0.486	-0.0137238	-0.0930981	-0.186664	-0.164873	-0.203354	-0.191854	-0.144293	-0.0968607	-0.0830023	-0.0888648	-0.087406	-0.0889853
0.487	-0.0134447	-0.0938511	-0.185682	-0.166684	-0.20098	-0.19368	-0.14515	-0.0956475	-0.084243	-0.0884817	-0.0863368	-0.0885675
0.488	-0.0130828	-0.0944492	-0.184585	-0.168306	-0.198828	-0.195485	-0.146041	-0.0944713	-0.0852297	-0.0884403	-0.0855422	-0.0881247
0.489	-0.0127692	-0.0949244	-0.183474	-0.169631	-0.197126	-0.197186	-0.146606	-0.0934869	-0.0860804	-0.0888949	-0.0850444	-0.0876787
0.49	-0.012652	-0.0952919	-0.182501	-0.170397	-0.196027	-0.19873	-0.146789	-0.0926743	-0.0865314	-0.0900718	-0.0848526	-0.08737
0.491	-0.012838	-0.0954845	-0.18178	-0.170218	-0.195625	-0.200056	-0.146751	-0.0919408	-0.0861683	-0.09176	-0.0849717	-0.0873286
0.492	-0.0133756	-0.0955187	-0.181448	-0.169053	-0.195967	-0.20112	-0.146563	-0.0913025	-0.0850993	-0.0934695	-0.085345	-0.0876475
0.493	-0.0143158	-0.0955828	-0.181624	-0.167369	-0.19699	-0.201889	-0.146212	-0.0908142	-0.0838748	-0.0949711	-0.0858625	-0.0883241
0.494	-0.0156649	-0.0958674	-0.182255	-0.165725	-0.198514	-0.202447	-0.145724	-0.0904668	-0.0828222	-0.0963428	-0.0864672	-0.0892191
0.495	-0.0172808	-0.0963784	-0.18314	-0.164417	-0.200425	-0.20306	-0.145122	-0.0902481	-0.0818917	-0.0975822	-0.087133	-0.0901197
0.496	-0.0189482	-0.0969548	-0.184119	-0.163532	-0.202643	-0.203977	-0.144395	-0.0902131	-0.0809955	-0.0985737	-0.087796	-0.0908799
0.497	-0.0204956	-0.0974298	-0.185126	-0.163144	-0.204876	-0.205242	-0.1436	-0.0904485	-0.0802027	-0.0993845	-0.0884186	-0.0915451
0.498	-0.0218121	-0.097743	-0.186106	-0.163324	-0.206799	-0.206663	-0.142856	-0.0909547	-0.079669	-0.100307	-0.0889274	-0.0922995
0.499	-0.0228506	-0.0979323	-0.187054	-0.164076	-0.208395	-0.207895	-0.142201	-0.0916911	-0.0795248	-0.101534	-0.0891134	-0.0931819
0.5	-0.0235991	-0.0980706	-0.1881	-0.165344	-0.20978	-0.208674	-0.141571	-0.0927358	-0.0797941	-0.102818	-0.0888233	-0.0939204
0.501	-0.0240437	-0.0982191	-0.189436	-0.166993	-0.211008	-0.209019	-0.140991	-0.0941899	-0.0803463	-0.103687	-0.0881462	-0.094262
0.502	-0.0241742	-0.0983536	-0.191242	-0.168943	-0.212184	-0.209164	-0.140611	-0.0959962	-0.080991	-0.104022	-0.0873154	-0.0942912
0.503	-0.0239508	-0.0983199	-0.193576	-0.171266	-0.213459	-0.209165	-0.140392	-0.0980056	-0.0816179	-0.104131	-0.086521	-0.0942529
0.504	-0.0232575	-0.0979004	-0.196283	-0.173935	-0.214952	-0.208766	-0.140064	-0.100149	-0.0822483	-0.104218	-0.0858296	-0.0942952
0.505	-0.0219901	-0.096938	-0.199084	-0.176754	-0.216665	-0.207777	-0.139439	-0.102486	-0.0829119	-0.104111	-0.085323	-0.0944514
0.506	-0.0201593	-0.0954664	-0.201709	-0.179603	-0.218375	-0.206287	-0.138477	-0.105099	-0.0835234	-0.10368	-0.0852422	-0.0946171
0.507	-0.017856	-0.0936804	-0.203963	-0.182295	-0.2198	-0.204485	-0.137118	-0.107946	-0.0840744	-0.103078	-0.0857447	-0.0944806
0.508	-0.0152236	-0.0917525	-0.205785	-0.184319	-0.220866	-0.202567	-0.135348	-0.110844	-0.0846925	-0.10237	-0.0866247	-0.0936909
0.509	-0.0124509	-0.0898015	-0.207214	-0.185011	-0.221733	-0.200792	-0.133288	-0.113626	-0.0854186	-0.101446	-0.0875795	-0.0920347
0.51	-0.00973296	-0.0879463	-0.208307	-0.183951	-0.222654	-0.199305	-0.131077	-0.116191	-0.0861729	-0.100361	-0.0885119	-0.0893987
0.511	-0.0072659	-0.0862397	-0.209155	-0.181268	-0.223684	-0.197927	-0.128814	-0.118395	-0.0868915	-0.0993591	-0.0893294	-0.0858087
0.512	-0.00518861	-0.0846369	-0.20982	-0.177493	-0.224573	-0.196408	-0.126574	-0.120046	-0.0875989	-0.0985948	-0.0898389	-0.0814976
0.513	-0.00352631	-0.0831188	-0.210195	-0.173066	-0.225036	-0.194789	-0.124464	-0.120958	-0.0883374	-0.0980595	-0.0899492	-0.0768899
0.514	-0.00224916	-0.0817288	-0.210144	-0.168326	-0.224966	-0.193316	-0.122661	-0.120947	-0.0891157	-0.0977632	-0.0896959	-0.0725688
0.515	-0.00133375	-0.080475	-0.209675	-0.163607	-0.224387	-0.192166	-0.121223	-0.119882	-0.0898706	-0.097841	-0.0891715	-0.0690168
0.516	-0.000773327	-0.0793581	-0.208878	-0.159039	-0.223385	-0.191341	-0.120013	-0.117869	-0.0904545	-0.0983125	-0.0885256	-0.0663919
0.517	-0.000507276	-0.0784409	-0.207846	-0.154669	-0.222121	-0.190773	-0.118896	-0.115312	-0.0908131	-0.0988398	-0.087858	-0.0647656
0.518	-0.000336921	-0.0777809	-0.206715	-0.150739	-0.22077	-0.190402	-0.117812	-0.112703	-0.0910135	-0.099061	-0.0871775	-0.0643007
0.519	5.18e-05	-0.0773967	-0.205614	-0.147425	-0.219391	-0.190036	-0.116762	-0.110282	-0.0910563	-0.0990079	-0.0865246	-0.0650598
0.52	0.000968382	-0.0773106	-0.204496	-0.144489	-0.217963	-0.189359	-0.115811	-0.107901	-0.0909068	-0.0988797	-0.0860028	-0.066879
0.521	0.00262181	-0.0774185	-0.20323	-0.141405	-0.216465	-0.188252	-0.114967	-0.105321	-0.0906089	-0.0988064	-0.0857386	-0.0694009
0.522	0.00514063	-0.0773967	-0.201809	-0.137839	-0.214898	-0.186815	-0.114168	-0.102535	-0.0902353	-0.0989846	-0.0857454	-0.0721605
0.523	0.00855111	-0.0768876	-0.200317	-0.133941	-0.213316	-0.185018	-0.113405	-0.0997604	-0.0898324	-0.099525	-0.0857089	-0.0747883
0.524	0.0126901	-0.0756863	-0.198835	-0.130092	-0.211759	-0.182682	-0.112704	-0.0973269	-0.0893827	-0.100226	-0.0851181	-0.0771444
0.525	0.0172472	-0.0738012	-0.197355	-0.126397	-0.210205	-0.179708	-0.11209	-0.0954873	-0.0888678	-0.100853	-0.0836417	-0.079092
0.526	0.0218766	-0.0713726	-0.195743	-0.122556	-0.208622	-0.176181	-0.111555	-0.0942165	-0.0883542	-0.101433	-0.0812533	-0.080343
0.527	0.0262552	-0.0684681	-0.193856	-0.118299	-0.206933	-0.172361	-0.110962	-0.0933285	-0.0877854	-0.102043	-0.0781653	-0.0806686
0.528	0.0300547	-0.0650854	-0.191702	-0.1138	-0.205005	-0.168474	-0.110159	-0.0927452	-0.0868936	-0.102517	-0.0747156	-0.0800054
0.529	0.0329428	-0.061355	-0.189399	-0.109479	-0.202797	-0.164533	-0.109048	-0.0924267	-0.0855082	-0.102626	-0.0711425	-0.0784829
0.53	0.0347356	-0.0575094	-0.187	-0.105562	-0.200386	-0.16048	-0.107414	-0.0922315	-0.0836815	-0.102292	-0.0675137	-0.0764651
0.531	0.0354821	-0.053725	-0.184407	-0.102001	-0.197773	-0.156376	-0.10507	-0.0920018	-0.0815135	-0.101349	-0.0639456	-0.0742816
0.532	0.0353617	-0.0501275	-0.181481	-0.0987642	-0.194858	-0.152388	-0.102229	-0.0915825	-0.0790947	-0.0995206	-0.060693	-0.0719997
0.533	0.0345118	-0.0467605	-0.178175	-0.0960873	-0.191619	-0.148671	-0.0994066	-0.0908304	-0.0765741	-0.096847	-0.0580275	-0.0695625
0.534	0.0329575	-0.0435726	-0.174547	-0.0942263	-0.188127	-0.145327	-0.0968411	-0.0896872	-0.0741402	-0.0938028	-0.0562058	-0.0669398
0.535	0.0307471	-0.0405268	-0.170758	-0.0931325	-0.184378	-0.142438	-0.0943585	-0.0881606	-0.0719084	-0.0908018	-0.0553962	-0.0642381
0.536	0.0280977	-0.0375999	-0.167	-0.0926391	-0.180334	-0.139987	-0.0918872	-0.0862567	-0.0699314	-0.0879209	-0.0555594	-0.0617463
0.537	0.0253783	-0.0346834	-0.163453	-0.0925879	-0.176126	-0.137818	-0.0895516	-0.083904	-0.0682931	-0.0852739	-0.0565362	-0.0597361
0.538	0.0229168	-0.0316383	-0.160258	-0.0925852	-0.172066	-0.135854	-0.0873175	-0.0809211	-0.0670341	-0.0830951	-0.0581461	-0.0583191
0.539	0.0208031	-0.0284451	-0.157411	-0.0922379	-0.168389	-0.134159	-0.0850753	-0.0771846	-0.0661097	-0.0814118	-0.060156	-0.057463
0.54	0.0189428	-0.0251988	-0.154775	-0.0916203	-0.16506	-0.13272	-0.0829491	-0.0728429	-0.0654874	-0.0800924	-0.0623818	-0.057014
0.541	0.01721	-0.0220101	-0.152209	-0.0909147	-0.161923	-0.131366	-0.0811937	-0.0681979	-0.0651456	-0.0790745	-0.0647518	-0.0567937
0.542	0.0154867	-0.0189264	-0.149602	-0.0899439	-0.158957	-0.129903	-0.0798874	-0.0633777	-0.0649913	-0.0783816	-0.067102	-0.056656
0.543	0.0137416	-0.0158458	-0.146894	-0.0885647	-0.156179	-0.128226	-0.0788901	-0.0583719	-0.0648093	-0.0780648	-0.069127	-0.056456
0.544	0.0120825	-0.0125968	-0.144064	-0.0870167	-0.153477	-0.126269	-0.0779797	-0.0533824	-0.0644081	-0.0781266	-0.0705358	-0.0560556
0.545	0.0106491	-0.00920453	-0.141124	-0.0855527	-0.150785	-0.123958	-0.0769512	-0.0488037	-0.0638393	-0.0784899	-0.0711536	-0.0553884
0.546	0.00957011	-0.00590227	-0.138124	-0.0840417	-0.148152	-0.121271	-0.075706	-0.0450109	-0.0632434	-0.078976	-0.071039	-0.0545036
0.547	0.00893575	-0.00287113	-0.135117	-0.082101	-0.145538	-0.11824	-0.0742015	-0.0424182	-0.0626131	-0.0792737	-0.0703908	-0.0534808
0.548	0.00868221	-0.000215395	-0.132142	-0.0796594	-0.142829	-0.11495	-0.0723373	-0.0414434	-0.061901	-0.0791289	-0.0692764	-0.0523457
0.549	0.00868952	0.00192096	-0.129247	-0.077176	-0.139958	-0.111601	-0.0699707	-0.0422205	-0.0611204	-0.0785912	-0.0676578	-0.0511092
0.55	0.00889172	0.00343011	-0.126458	-0.0750912	-0.136883	-0.108472	-0.0670783	-0.0444113	-0.0602172	-0.0777635	-0.0655759	-0.0498673
0.551	0.00915631	0.00429686	-0.123805	-0.0733461	-0.13365	-0.10575	-0.0639185	-0.0473695	-0.059008	-0.0764118	-0.0631485	-0.0487893
0.552	0.00931332	0.00457222	-0.121351	-0.0716086	-0.13045	-0.103443	-0.0608746	-0.050461	-0.0573169	-0.0742919	-0.0604562	-0.0479865
0.553	0.00932749	0.00440836	-0.119123	-0.0696451	-0.127447	-0.101489	-0.0581834	-0.0532883	-0.0550769	-0.0716225	-0.0575662	-0.0474925
0.554	0.00932821	0.00400465	-0.117016	-0.0673484	-0.124627	-0.0998897	-0.0559193	-0.0557354	-0.0523302	-0.0688107	-0.0546558	-0.0473022
0.555	0.00947841	0.00350515	-0.114842	-0.0646229	-0.12184	-0.0986706	-0.0541464	-0.0578016	-0.0492277	-0.0659547	-0.0519487	-0.0473321
0.556	0.00981162	0.002963	-0.112462	-0.0612546	-0.118954	-0.097683	-0.0530398	-0.059431	-0.0459768	-0.0629572	-0.0496104	-0.0474484
0.557	0.0101804	0.00232144	-0.109749	-0.0570578	-0.116035	-0.0966548	-0.0527392	-0.060541	-0.042824	-0.0600545	-0.0477593	-0.0475986
0.558	0.0103784	0.00150836	-0.10659	-0.052287	-0.113313	-0.0955146	-0.0530992	-0.0611208	-0.0400821	-0.0577923	-0.0464651	-0.0477728
0.559	0.0103181	0.000586466	-0.103056	-0.0475828	-0.110956	-0.0943991	-0.0537789	-0.061138	-0.0379848	-0.056272	-0.0457347	-0.0478475
0.56	0.0100296	-0.00028624	-0.0993706	-0.0435009	-0.108998	-0.0933479	-0.0545011	-0.0604954	-0.0365406	-0.0549328	-0.0454794	-0.0476802
0.561	0.00963667	-0.00105638	-0.0957425	-0.0403179	-0.107373	-0.09228	-0.0551586	-0.059249	-0.0356515	-0.0533498	-0.0455201	-0.0473164
0.562	0.0093353	-0.00181707	-0.092312	-0.0381302	-0.105927	-0.0911901	-0.0557433	-0.0576017	-0.0352187	-0.0516657	-0.0456505	-0.0469186
0.563	0.00919864	-0.00260148	-0.089151	-0.0369091	-0.104485	-0.0901701	-0.0561214	-0.0557092	-0.0351452	-0.0500091	-0.045742	-0.0464912
0.564	0.00912471	-0.00335419	-0.0863163	-0.0365597	-0.102962	-0.0892574	-0.0559827	-0.053713	-0.0353884	-0.0482136	-0.0457477	-0.0458805
0.565	0.00904883	-0.00408791	-0.0838525	-0.0370291	-0.101285	-0.0883309	-0.0550685	-0.0517707	-0.0358992	-0.0463765	-0.0455324	-0.0450583
0.566	0.00904936	-0.0048245	-0.0817645	-0.0383893	-0.0993282	-0.0872386	-0.0532674	-0.0499744	-0.0365483	-0.0449743	-0.0449665	-0.0441349
0.567	0.00919461	-0.00555072	-0.0800454	-0.0408337	-0.0971097	-0.0859659	-0.0505928	-0.048288	-0.0371298	-0.0442236	-0.0441337	-0.0431632
0.568	0.00941682	-0.00626258	-0.0786632	-0.0443028	-0.0948967	-0.0845514	-0.0473165	-0.0466465	-0.0373489	-0.0438146	-0.0431709	-0.0420861
0.569	0.0096275	-0.00689166	-0.0775653	-0.0479815	-0.0929815	-0.0829532	-0.0441093	-0.0451616	-0.0369447	-0.0433501	-0.0420652	-0.0407793
0.57	0.00988329	-0.00729477	-0.0767403	-0.0508464	-0.0914019	-0.0811589	-0.0416925	-0.0440023	-0.0358572	-0.0427517	-0.0407918	-0.0392382
0.571	0.0103537	-0.00733191	-0.0762091	-0.0529758	-0.089948	-0.0793115	-0.0402477	-0.0431268	-0.0342417	-0.042124	-0.0395299	-0.0376972
0.572	0.0111482	-0.00691798	-0.0759071	-0.0553362	-0.0884694	-0.077533	-0.0394972	-0.0423658	-0.032419	-0.041434	-0.0385024	-0.0364278
0.573	0.0122591	-0.00607442	-0.075577	-0.0582157	-0.0869718	-0.0757988	-0.0391839	-0.0416352	-0.0307293	-0.040659	-0.0376871	-0.0355448
0.574	0.0135699	-0.00494179	-0.0748679	-0.0609183	-0.0854732	-0.0742036	-0.0392521	-0.0408328	-0.0293198	-0.0400306	-0.0369074	-0.0349819
0.575	0.0148538	-0.00368225	-0.0735722	-0.0628391	-0.0840108	-0.0730525	-0.0397006	-0.0397849	-0.0281528	-0.0397406	-0.0361271	-0.0345777
0.576	0.0159384	-0.00236563	-0.0717622	-0.0639608	-0.0827036	-0.0725299	-0.0403635	-0.0385339	-0.0272137	-0.0396787	-0.0354925	-0.0342527
0.577	0.0168112	-0.000930708	-0.0697355	-0.0643301	-0.0816759	-0.0725692	-0.0409644	-0.0372882	-0.0265966	-0.0396497	-0.0351358	-0.0339874
0.578	0.017496	0.000724044	-0.0677598	-0.0636917	-0.0809948	-0.0729585	-0.0413949	-0.036061	-0.0263668	-0.0395905	-0.0350427	-0.0336697
0.579	0.0179668	0.0026031	-0.0658689	-0.0616914	-0.0806982	-0.0734366	-0.0417396	-0.0348043	-0.0264197	-0.0394653	-0.0350283	-0.0331881
0.58	0.018239	0.00461658	-0.0639099	-0.0581931	-0.0806988	-0.0738007	-0.0419399	-0.033773	-0.0265535	-0.0392523	-0.0348473	-0.032557
0.581	0.018426	0.0066297	-0.0617233	-0.0536773	-0.080692	-0.073902	-0.0417655	-0.0332697	-0.0266244	-0.0391043	-0.0343957	-0.0318115
0.582	0.0185584	0.00846504	-0.0592945	-0.049354	-0.0803877	-0.0735911	-0.0411408	-0.0331597	-0.0266552	-0.0391415	-0.0337096	-0.0309513
0.583	0.0185387	0.0099284	-0.05676	-0.0464617	-0.0797933	-0.0728472	-0.0402264	-0.0330697	-0.0267992	-0.0391511	-0.0328778	-0.0299932
0.584	0.0183543	0.0108514	-0.0543099	-0.0454157	-0.079102	-0.071931	-0.0392935	-0.032915	-0.0270531	-0.0387427	-0.0320493	-0.0289705
0.585	0.0180953	0.0111147	-0.052087	-0.0457987	-0.0784644	-0.0711656	-0.0385476	-0.0328918	-0.0270915	-0.0377448	-0.0313367	-0.0279517
0.586	0.0178071	0.0107672	-0.0501069	-0.0470061	-0.0779569	-0.0706246	-0.0380271	-0.0330835	-0.0264557	-0.0363424	-0.0306461	-0.0270629
0.587	0.0174396	0.010047	-0.0482915	-0.0486549	-0.0775185	-0.0702112	-0.0376457	-0.0334014	-0.0249223	-0.0348057	-0.0296707	-0.0264149
0.588	0.0168783	0.00917736	-0.0466227	-0.0505763	-0.0769662	-0.069881	-0.0372404	-0.0337888	-0.0227985	-0.0333177	-0.0281645	-0.0259124
0.589	0.0160016	0.00832849	-0.0451949	-0.0527137	-0.0762381	-0.0695885	-0.0367519	-0.0341712	-0.0206682	-0.032033	-0.026247	-0.0252645
0.59	0.014771	0.0076447	-0.0440699	-0.054866	-0.07546	-0.0691116	-0.0363264	-0.0342866	-0.0188261	-0.0310401	-0.0243401	-0.0243802
0.591	0.0132937	0.007189	-0.0431625	-0.0564683	-0.0747385	-0.0681985	-0.0360685	-0.0338224	-0.0172627	-0.0303881	-0.0228514	-0.0235369
0.592	0.0118013	0.00695629	-0.0423415	-0.0568174	-0.074036	-0.0668391	-0.0358738	-0.0327562	-0.0160126	-0.0301536	-0.0219575	-0.0230697
0.593	0.0105129	0.00687487	-0.0415704	-0.0554859	-0.0731319	-0.0651755	-0.0355124	-0.0313816	-0.0151655	-0.0303413	-0.0215932	-0.0230764
0.594	0.00950679	0.00686964	-0.0408852	-0.0524671	-0.0716655	-0.0632814	-0.03486	-0.0299503	-0.014853	-0.0308629	-0.0216349	-0.023401
0.595	0.00880982	0.00694956	-0.0402798	-0.0480545	-0.0695066	-0.0612415	-0.0340558	-0.0284967	-0.0152793	-0.0315957	-0.0220094	-0.0238179
0.596	0.00841454	0.00712822	-0.0396619	-0.0426357	-0.0669767	-0.0592749	-0.0332392	-0.0270464	-0.0164033	-0.0324182	-0.0225907	-0.0242107
0.597	0.00819314	0.00734741	-0.0390023	-0.0365783	-0.0644884	-0.0575967	-0.0323497	-0.025779	-0.01778	-0.0332675	-0.0231894	-0.0245854
0.598	0.00801503	0.00748436	-0.0383873	-0.0304116	-0.0622321	-0.0563103	-0.0314299	-0.0248982	-0.0189776	-0.034146	-0.0236773	-0.0249613
0.599	0.00781269	0.00740784	-0.0378048	-0.0248814	-0.0602306	-0.0554367	-0.0307567	-0.0244291	-0.0199767	-0.0351969	-0.024071	-0.0252326
0.6	0.00753602	0.00710441	-0.0371283	-0.0205302	-0.0585411	-0.0548924	-0.0304527	-0.0242849	-0.0209406	-0.0365596	-0.0244754	-0.0252068
0.601	0.00723016	0.00668945	-0.0362965	-0.0173857	-0.0574203	-0.0544907	-0.0303185	-0.0243976	-0.0217797	-0.0378246	-0.02495	-0.024907
0.602	0.00704831	0.00630441	-0.0353504	-0.0150072	-0.0571163	-0.0540151	-0.0302137	-0.0246087	-0.0222481	-0.038038	-0.0255026	-0.0245815
0.603	0.00706688	0.00603681	-0.0344081	-0.0127468	-0.0575291	-0.0533383	-0.0302504	-0.0247457	-0.0223056	-0.0365781	-0.026158	-0.0243586
0.604	0.00722522	0.00584607	-0.033602	-0.0099231	-0.0583219	-0.0524426	-0.0305346	-0.0248379	-0.0221327	-0.0338348	-0.0268822	-0.024224
0.605	0.00746856	0.00555328	-0.0329842	-0.00546961	-0.0592422	-0.0512472	-0.03095	-0.024964	-0.0218383	-0.0307397	-0.0275126	-0.0242021
0.606	0.00780973	0.00498409	-0.0325603	0.00171484	-0.060169	-0.0496036	-0.0312263	-0.0250513	-0.0213595	-0.0278042	-0.0279204	-0.0243278
0.607	0.00823814	0.00412204	-0.0323651	0.0111239	-0.0610264	-0.0475645	-0.0312359	-0.0250053	-0.020699	-0.0250664	-0.0280462	-0.0245972
0.608	0.00860464	0.00308799	-0.0324165	0.0203715	-0.0617377	-0.0455096	-0.0311903	-0.0248499	-0.0199789	-0.0225797	-0.02782	-0.0250083
0.609	0.00868572	0.00200817	-0.0326787	0.0270021	-0.0621879	-0.0439123	-0.0314024	-0.0246829	-0.0192007	-0.0204443	-0.0272718	-0.0255609
0.61	0.00839903	0.000955107	-0.0330758	0.0297163	-0.0622592	-0.0429888	-0.0319548	-0.0245506	-0.0182467	-0.0187489	-0.0265401	-0.0262009
0.611	0.007805	2.97e-06	-0.0334479	0.0282028	-0.0619015	-0.0426812	-0.0326777	-0.024332	-0.0171263	-0.0176794	-0.0257368	-0.0268102
0.612	0.00696881	-0.000774471	-0.0336307	0.0228823	-0.0611837	-0.0428238	-0.0333155	-0.0239203	-0.0160181	-0.0173528	-0.0249274	-0.0272457
0.613	0.00603625	-0.00140624	-0.0336357	0.0149034	-0.0602927	-0.0431278	-0.0337731	-0.0234716	-0.0151337	-0.0176833	-0.024159	-0.0273376
0.614	0.00525244	-0.00206415	-0.0335629	0.00576004	-0.0593866	-0.043385	-0.0341873	-0.0232283	-0.0146387	-0.0186805	-0.0234763	-0.026988
0.615	0.00479389	-0.00290947	-0.0334334	-0.00344655	-0.058484	-0.0436953	-0.034649	-0.0233342	-0.0145914	-0.0204505	-0.0229554	-0.0263269
0.616	0.00471395	-0.00393513	-0.0332655	-0.0124107	-0.057582	-0.0441419	-0.0350716	-0.0238643	-0.0149301	-0.0227423	-0.0226641	-0.0256248
0.617	0.00490319	-0.00501174	-0.0331185	-0.0213188	-0.0567073	-0.0446036	-0.03536	-0.0247115	-0.0155845	-0.025007	-0.0225808	-0.0250585
0.618	0.00514458	-0.00595741	-0.0329692	-0.0301523	-0.055828	-0.0449959	-0.035464	-0.0255276	-0.0164815	-0.026889	-0.0226237	-0.0246061
0.619	0.00542447	-0.00660832	-0.0327093	-0.0384186	-0.0549554	-0.0452704	-0.0353387	-0.0260312	-0.0174474	-0.0283511	-0.0226723	-0.0242105
0.62	0.00608575	-0.006961	-0.0322874	-0.0456223	-0.0542035	-0.0452853	-0.0349978	-0.026225	-0.0183177	-0.0294293	-0.0225386	-0.0239905
0.621	0.00759858	-0.00714534	-0.0317151	-0.0516199	-0.0536341	-0.0449702	-0.034537	-0.026181	-0.0190453	-0.0300331	-0.0220876	-0.0241422
0.622	0.0101814	-0.00725255	-0.0309695	-0.0563624	-0.0532577	-0.0444393	-0.0341415	-0.0259002	-0.0196558	-0.0300754	-0.0213523	-0.0247236
0.623	0.0135986	-0.00726522	-0.030064	-0.0596428	-0.0530957	-0.0438573	-0.0340243	-0.0253737	-0.0202269	-0.029618	-0.0204795	-0.0256019
0.624	0.0173043	-0.00701302	-0.0291482	-0.0612395	-0.0531123	-0.0433361	-0.0341978	-0.0245609	-0.0207037	-0.0287311	-0.0196931	-0.0265279
0.625	0.020717	-0.00631025	-0.0284203	-0.0611469	-0.0532085	-0.0429168	-0.0344294	-0.0234718	-0.0208739	-0.0274936	-0.0192112	-0.0273521
0.626	0.0233696	-0.00525697	-0.0280474	-0.0596252	-0.0533409	-0.0426839	-0.0345529	-0.0222885	-0.0207209	-0.0261968	-0.0191163	-0.0280858
0.627	0.0249769	-0.00414057	-0.0281198	-0.0570592	-0.0535745	-0.042777	-0.0346723	-0.0212073	-0.0204457	-0.0252408	-0.0193801	-0.0286266
0.628	0.0254945	-0.00316678	-0.0285906	-0.0537874	-0.0539283	-0.043202	-0.0349589	-0.0201887	-0.0201556	-0.0248071	-0.0198852	-0.0287563
0.629	0.0250965	-0.00248536	-0.0293187	-0.0502052	-0.0542517	-0.0437933	-0.0354562	-0.0190646	-0.0198171	-0.0249024	-0.0205025	-0.0284703
0.63	0.0240561	-0.00220039	-0.0300739	-0.0468547	-0.0543059	-0.0442897	-0.0361807	-0.0178818	-0.0193673	-0.025564	-0.0211969	-0.0279692
0.631	0.0225925	-0.00226501	-0.0305723	-0.0441188	-0.0539767	-0.0444725	-0.0370752	-0.0168665	-0.0187579	-0.0266165	-0.0218086	-0.0273706
0.632	0.0208468	-0.00250969	-0.0307413	-0.0420746	-0.053392	-0.0443778	-0.0378516	-0.0160626	-0.0180245	-0.0275129	-0.0220614	-0.0266425
0.633	0.01898	-0.00274781	-0.0307489	-0.0407655	-0.0526013	-0.0442969	-0.0381403	-0.0153176	-0.0172789	-0.0278776	-0.0219799	-0.0257282
0.634	0.0171485	-0.0028976	-0.0306987	-0.040286	-0.0512894	-0.0444699	-0.0377556	-0.0146296	-0.0166769	-0.027873	-0.0218975	-0.0246402
0.635	0.0154251	-0.0030569	-0.0306289	-0.0405525	-0.0491898	-0.0448533	-0.0368094	-0.0141647	-0.0164144	-0.0277609	-0.0220637	-0.0235815
0.636	0.0137891	-0.00335401	-0.0306527	-0.0412772	-0.0465225	-0.0452796	-0.0355509	-0.0139515	-0.0165705	-0.0275868	-0.0224152	-0.0229391
0.637	0.0121818	-0.0037653	-0.0308135	-0.0422209	-0.0438344	-0.0456477	-0.0341582	-0.0138247	-0.0170684	-0.0273322	-0.02273	-0.022959
0.638	0.0106385	-0.00417939	-0.0310014	-0.0434008	-0.0417366	-0.0459106	-0.0327544	-0.0136249	-0.0178167	-0.0269558	-0.0229173	-0.0235567
0.639	0.00930488	-0.00452338	-0.0311205	-0.0449734	-0.0407003	-0.0461769	-0.0314427	-0.0134406	-0.0186754	-0.0264461	-0.0230634	-0.0244663
0.64	0.00830175	-0.00474516	-0.0311961	-0.0469143	-0.0408167	-0.0466121	-0.0303439	-0.0135721	-0.0194093	-0.0260076	-0.0233087	-0.0254243
0.641	0.00764254	-0.00482836	-0.0313127	-0.0490567	-0.0418323	-0.04705	-0.0296557	-0.0141482	-0.0198824	-0.0260451	-0.02372	-0.0262836
0.642	0.00719624	-0.00481792	-0.0315325	-0.051283	-0.0434082	-0.0471552	-0.0294994	-0.0149983	-0.0201458	-0.0267828	-0.0242342	-0.0270113
0.643	0.00674187	-0.00479493	-0.0318587	-0.0534161	-0.0452596	-0.0469099	-0.0298197	-0.0158565	-0.020264	-0.0278888	-0.0247517	-0.0276128
0.644	0.00617719	-0.00487861	-0.0322711	-0.0551181	-0.0472175	-0.046509	-0.0305855	-0.0165273	-0.020262	-0.0286276	-0.0252031	-0.0280792
0.645	0.00556805	-0.00513084	-0.0327856	-0.0560025	-0.0492505	-0.0459941	-0.0317471	-0.0169903	-0.0202176	-0.0283891	-0.0255205	-0.0284058
0.646	0.00501022	-0.00548213	-0.033363	-0.0559055	-0.0513215	-0.0453407	-0.0330719	-0.0174067	-0.0201565	-0.0271114	-0.0256932	-0.0286494
0.647	0.00456805	-0.00581125	-0.0338386	-0.0550997	-0.0532616	-0.0446066	-0.0344058	-0.0180032	-0.0199782	-0.0251752	-0.0257827	-0.0288459
0.648	0.00427046	-0.00606012	-0.0340944	-0.0540842	-0.0548356	-0.0437989	-0.03576	-0.0188178	-0.0196969	-0.0229608	-0.0258087	-0.0289532
0.649	0.00410177	-0.00626565	-0.0341355	-0.0531102	-0.0558977	-0.0430568	-0.0369958	-0.0195715	-0.0195512	-0.0207705	-0.02569	-0.0289179
0.65	0.00404019	-0.0064855	-0.0339926	-0.0520548	-0.0564519	-0.0428358	-0.0378308	-0.0200327	-0.0197195	-0.0189752	-0.0253096	-0.028691
0.651	0.00413494	-0.0067839	-0.0337507	-0.0508292	-0.0565558	-0.0433871	-0.038216	-0.0203099	-0.0201066	-0.0178418	-0.0246568	-0.0282961
0.652	0.00439264	-0.00725509	-0.0335554	-0.0494929	-0.0562208	-0.0444023	-0.0383504	-0.0205162	-0.0204608	-0.0172427	-0.0238182	-0.0278734
0.653	0.00466335	-0.00795559	-0.0334823	-0.047743	-0.0554313	-0.0454543	-0.0382601	-0.0205098	-0.0206002	-0.0167712	-0.0228477	-0.0275776
0.654	0.00480017	-0.00880186	-0.0335014	-0.0449978	-0.0543214	-0.0464155	-0.0376994	-0.0201998	-0.0205164	-0.0162525	-0.0217993	-0.0275102
0.655	0.00476566	-0.00954035	-0.033536	-0.0411089	-0.0532306	-0.0473594	-0.0364959	-0.0197335	-0.0202407	-0.0159705	-0.0208252	-0.0276887
0.656	0.00463027	-0.00990064	-0.0334537	-0.0364481	-0.05244	-0.0482502	-0.034787	-0.0192803	-0.0197261	-0.0162461	-0.0201187	-0.0280113
0.657	0.00451465	-0.00972609	-0.0331132	-0.0315732	-0.0520178	-0.0488191	-0.032879	-0.0188394	-0.0189842	-0.0171799	-0.0197259	-0.0283747
0.658	0.00444243	-0.00892456	-0.032552	-0.0270596	-0.0519124	-0.0488461	-0.0310243	-0.0183341	-0.0181356	-0.0188517	-0.0195239	-0.0287358
0.659	0.00431491	-0.00753906	-0.0319364	-0.0233393	-0.0520082	-0.0485266	-0.0294376	-0.0178028	-0.0173006	-0.0211764	-0.0194298	-0.0289308
0.66	0.00405677	-0.00590639	-0.0313615	-0.0207103	-0.0521811	-0.0482551	-0.0282483	-0.0173338	-0.016605	-0.0237606	-0.0194757	-0.0287169
0.661	0.00371429	-0.00450213	-0.0308897	-0.0194553	-0.052358	-0.0480565	-0.0273258	-0.0169615	-0.0162499	-0.026355	-0.0197144	-0.0280656
0.662	0.00338677	-0.00355158	-0.0305177	-0.0196168	-0.0524732	-0.0475734	-0.0264459	-0.0167701	-0.0164372	-0.0289761	-0.0200683	-0.0271685
0.663	0.00317696	-0.00295824	-0.0301432	-0.0209155	-0.0523756	-0.0465914	-0.0256809	-0.0168878	-0.0171308	-0.0313431	-0.0203101	-0.0262409
0.664	0.00317281	-0.00261795	-0.0297133	-0.0230749	-0.0518939	-0.0453375	-0.0252674	-0.0173014	-0.0180274	-0.0329536	-0.0202803	-0.025478
0.665	0.00338242	-0.00254134	-0.0291877	-0.0258296	-0.0510036	-0.0441679	-0.0250424	-0.0178549	-0.0188661	-0.0338523	-0.019961	-0.0250201
0.666	0.00375796	-0.00265971	-0.0284888	-0.0287985	-0.0497452	-0.043229	-0.0244966	-0.0184704	-0.0196108	-0.0344778	-0.0194221	-0.0248594
0.667	0.00423554	-0.00279301	-0.0275892	-0.0317732	-0.0481747	-0.0426668	-0.0234405	-0.0192463	-0.0202967	-0.0348494	-0.0188428	-0.0249076
0.668	0.0047194	-0.00281448	-0.0264888	-0.0348318	-0.046478	-0.0427095	-0.0221511	-0.0202102	-0.0208533	-0.0346635	-0.0184184	-0.0251104
0.669	0.00512807	-0.00272297	-0.0252477	-0.0379075	-0.0448546	-0.0432817	-0.0208482	-0.0211221	-0.0212035	-0.034052	-0.018157	-0.0254579
0.67	0.00546686	-0.00261273	-0.0240451	-0.0406403	-0.0434053	-0.0440701	-0.0194664	-0.0217408	-0.0214107	-0.0336256	-0.0178807	-0.0259725
0.671	0.00576969	-0.00255377	-0.0230731	-0.0426404	-0.0421863	-0.0450491	-0.0180471	-0.022022	-0.0215564	-0.0337015	-0.0174775	-0.0266945
0.672	0.00598967	-0.00248179	-0.0224584	-0.0435646	-0.0412581	-0.0463412	-0.0169565	-0.0219774	-0.0216225	-0.0340172	-0.0170472	-0.0276227
0.673	0.0060747	-0.00226632	-0.0222716	-0.0431914	-0.0406203	-0.0476661	-0.0164665	-0.0215955	-0.0216453	-0.0343934	-0.0168152	-0.0286814
0.674	0.00606865	-0.00186228	-0.0225004	-0.0414869	-0.039968	-0.0485407	-0.0164418	-0.0208617	-0.021705	-0.0350797	-0.0169097	-0.0297513
0.675	0.00605158	-0.00130999	-0.0229812	-0.0384783	-0.0388492	-0.0487149	-0.0166965	-0.0198438	-0.0216532	-0.036092	-0.0172308	-0.0306464
0.676	0.00609013	-0.000612026	-0.0234487	-0.0343556	-0.0372049	-0.0481166	-0.0173429	-0.0187948	-0.0212353	-0.0369248	-0.0176431	-0.0311416
0.677	0.00621138	0.000268284	-0.023738	-0.0295764	-0.0353561	-0.0468439	-0.0184578	-0.0180403	-0.0204854	-0.0373174	-0.0181377	-0.0311704
0.678	0.00633452	0.00126484	-0.0238709	-0.0245502	-0.033666	-0.0451284	-0.0196831	-0.0178236	-0.0196649	-0.0374991	-0.0186761	-0.0309001
0.679	0.00627686	0.00223724	-0.0239252	-0.0195119	-0.0324084	-0.0431079	-0.0206113	-0.0182584	-0.0188269	-0.0374795	-0.0190865	-0.0305326
0.68	0.00594105	0.00317272	-0.0238777	-0.014775	-0.0316739	-0.0408994	-0.0212915	-0.0192482	-0.0177371	-0.0369515	-0.0192225	-0.030138
0.681	0.00550148	0.00411054	-0.0236827	-0.0107564	-0.0313872	-0.038723	-0.0218709	-0.0205	-0.0163117	-0.0359507	-0.019114	-0.0296592
0.682	0.00524496	0.00497938	-0.023418	-0.00787746	-0.0314396	-0.0367824	-0.0221104	-0.0217344	-0.0148022	-0.0348893	-0.0188713	-0.0289517
0.683	0.00530908	0.0057083	-0.0231997	-0.00644891	-0.0316712	-0.0352435	-0.0217274	-0.0228577	-0.013444	-0.0338867	-0.0185177	-0.0278826
0.684	0.0056337	0.00629472	-0.0230844	-0.00632238	-0.0317862	-0.0342022	-0.0208822	-0.0238238	-0.0122628	-0.0326709	-0.0180151	-0.0264435
0.685	0.00601496	0.0067466	-0.0230322	-0.00695836	-0.0315407	-0.0335592	-0.0199745	-0.0244075	-0.0112759	-0.0312684	-0.0173711	-0.0247797
0.686	0.00630209	0.00707213	-0.0229036	-0.00793011	-0.0309738	-0.0330717	-0.0191284	-0.0242722	-0.010596	-0.0301537	-0.0166866	-0.0231111
0.687	0.00651319	0.00726668	-0.0226009	-0.00899445	-0.0302991	-0.0324864	-0.0181442	-0.0232578	-0.0103094	-0.0294849	-0.0161177	-0.0215979
0.688	0.00668909	0.00732987	-0.0221542	-0.00997747	-0.0297456	-0.0317026	-0.0169387	-0.0215871	-0.0103934	-0.0288696	-0.0158154	-0.0203393
0.689	0.0068411	0.00730728	-0.0216832	-0.0107231	-0.0294795	-0.030815	-0.0156584	-0.0197017	-0.0107285	-0.0281762	-0.0159307	-0.0193979
0.69	0.0069971	0.00724999	-0.02131	-0.0108861	-0.0295309	-0.0298458	-0.0143618	-0.017909	-0.0111692	-0.0278376	-0.0165183	-0.0187785
0.691	0.00716038	0.0071543	-0.0210766	-0.0101028	-0.0298126	-0.0286152	-0.0130053	-0.0162985	-0.0115985	-0.0281365	-0.0174412	-0.018477
0.692	0.00735745	0.00694438	-0.0209218	-0.00844725	-0.0301781	-0.0270099	-0.0117122	-0.0148787	-0.0119054	-0.0289495	-0.0184937	-0.0184329
0.693	0.00768562	0.00654477	-0.0206842	-0.0062883	-0.0304519	-0.0251128	-0.0107654	-0.0136689	-0.011992	-0.030108	-0.0195059	-0.0184551
0.694	0.00818612	0.00598708	-0.0201949	-0.00386631	-0.0304656	-0.023055	-0.0102795	-0.012642	-0.0118969	-0.0313934	-0.0203361	-0.0183658
0.695	0.00884609	0.0053593	-0.0193981	-0.00132694	-0.0301125	-0.02102	-0.0101058	-0.0117349	-0.011789	-0.032388	-0.0208736	-0.0181208
0.696	0.00969571	0.00476546	-0.0183611	0.00108901	-0.0293678	-0.0192491	-0.0101163	-0.0109742	-0.0117772	-0.0326971	-0.0210164	-0.0177122
0.697	0.0107058	0.00436611	-0.0171946	0.00314388	-0.0282622	-0.01788	-0.010354	-0.0104163	-0.0118736	-0.0322477	-0.0206678	-0.0171009
0.698	0.0117419	0.00425557	-0.0159687	0.00477501	-0.0268202	-0.0169671	-0.010795	-0.0100214	-0.0119791	-0.0311469	-0.0198432	-0.016289
0.699	0.0126496	0.00436273	-0.0147165	0.00612343	-0.0250522	-0.0166062	-0.0111488	-0.00967437	-0.0118824	-0.0293841	-0.0186895	-0.0153531
0.7	0.0132912	0.00454408	-0.0134809	0.00739657	-0.022997	-0.0168154	-0.011183	-0.00924524	-0.0114856	-0.026925	-0.0173487	-0.0144093
0.701	0.0135851	0.00463891	-0.0123073	0.00856726	-0.0207505	-0.0174156	-0.0109457	-0.00860475	-0.0108454	-0.0239279	-0.0159045	-0.0136124
0.702	0.0135573	0.00448625	-0.01125	0.00938619	-0.0185525	-0.0181488	-0.0104823	-0.00769052	-0.00989568	-0.0206673	-0.0144304	-0.013147
0.703	0.0133248	0.00404105	-0.0103982	0.00980452	-0.0166894	-0.0188503	-0.00977329	-0.00655329	-0.00835484	-0.0173153	-0.0129559	-0.0131584
0.704	0.0129385	0.00341771	-0.00980628	0.0100215	-0.0152598	-0.0195497	-0.0088837	-0.00522112	-0.00608136	-0.0139871	-0.0114865	-0.0135821
0.705	0.0123739	0.00278569	-0.00948189	0.0101504	-0.0142062	-0.020339	-0.00791522	-0.00370332	-0.00340986	-0.0109138	-0.0102025	-0.0140929
0.706	0.0117032	0.00226209	-0.00944112	0.0101829	-0.0135122	-0.0211223	-0.00693292	-0.00214629	-0.000929368	-0.00829618	-0.00940392	-0.0143763
0.707	0.0110794	0.0018735	-0.00962575	0.0101306	-0.0133029	-0.0217575	-0.00600342	-0.000746858	0.00091158	-0.00607758	-0.00917043	-0.0143922
0.708	0.0106662	0.00161748	-0.00988888	0.0100122	-0.0137284	-0.0223071	-0.00528	0.00041229	0.00185508	-0.00410013	-0.00937015	-0.0143212
0.709	0.0106349	0.0014882	-0.0100618	0.00984554	-0.0147805	-0.0228215	-0.00489596	0.00132958	0.001815	-0.00251835	-0.00991424	-0.0142949
0.71	0.0110299	0.00146846	-0.00997441	0.00967281	-0.0162646	-0.0231506	-0.0047451	0.00190106	0.000952876	-0.00179657	-0.0107259	-0.0143078
0.711	0.0117083	0.00156066	-0.00953623	0.00940304	-0.0178999	-0.0231617	-0.00466544	0.00190171	-0.000437018	-0.0021528	-0.0115876	-0.0143365
0.712	0.0125551	0.0017193	-0.00878249	0.00875978	-0.0194489	-0.0228859	-0.0047661	0.00126658	-0.00212058	-0.00327995	-0.0121241	-0.0143585
0.713	0.0135773	0.00179677	-0.00785103	0.00756523	-0.0207279	-0.0224623	-0.00524835	0.000139071	-0.00393525	-0.00472579	-0.011957	-0.0143917
0.714	0.0147795	0.00163508	-0.00688287	0.00587108	-0.0215128	-0.0221092	-0.00601267	-0.00135631	-0.00570156	-0.00631354	-0.0109907	-0.0145024
0.715	0.0160897	0.0012009	-0.00588445	0.00382255	-0.0215409	-0.0219967	-0.00670667	-0.0030949	-0.00720834	-0.00802242	-0.00951889	-0.0146206
0.716	0.0174027	0.000678377	-0.00485689	0.00144447	-0.0207073	-0.0219826	-0.00723595	-0.00490036	-0.00835069	-0.0097005	-0.00796979	-0.0146204
0.717	0.0186794	0.000333512	-0.00395776	-0.0014273	-0.0191987	-0.0217712	-0.00791834	-0.00665752	-0.00921725	-0.0110476	-0.00668779	-0.0145651
0.718	0.0199337	0.00022542	-0.00331505	-0.00479496	-0.0173328	-0.0214955	-0.00890125	-0.00823764	-0.00993505	-0.0117364	-0.00588306	-0.0145527
0.719	0.0211245	0.000219537	-0.00287751	-0.00835229	-0.01537	-0.0215993	-0.00981585	-0.00938224	-0.0104569	-0.0115475	-0.00554424	-0.0145853
0.72	0.0221927	0.000226932	-0.00251544	-0.0118246	-0.0134741	-0.0221137	-0.0101179	-0.00988994	-0.0106355	-0.0103389	-0.00558077	-0.0146906
0.721	0.0231647	0.000305399	-0.00213589	-0.0150448	-0.0118486	-0.0226411	-0.00944569	-0.00980152	-0.0105489	-0.00786857	-0.00601488	-0.0148488
0.722	0.0241081	0.000573977	-0.0017375	-0.0177798	-0.0107728	-0.0229336	-0.00780169	-0.00930601	-0.0104538	-0.00387297	-0.00683537	-0.0149945
0.723	0.0249668	0.00106415	-0.00142361	-0.0198522	-0.0103128	-0.0230616	-0.00566276	-0.00851865	-0.0104124	0.00126085	-0.00792084	-0.0151204
0.724	0.0254995	0.00173298	-0.00134478	-0.0213012	-0.0102692	-0.0230263	-0.00373493	-0.00741068	-0.0103926	0.00603547	-0.00919013	-0.0151083
0.725	0.0254432	0.00258817	-0.0015439	-0.0221982	-0.0104842	-0.0225853	-0.00242487	-0.00601722	-0.0105852	0.00890512	-0.0106456	-0.0145667
0.726	0.0246944	0.00369227	-0.00188353	-0.0225533	-0.0109488	-0.0216599	-0.00174099	-0.0045016	-0.0112286	0.0096068	-0.0122369	-0.0130393
0.727	0.0233271	0.00499355	-0.00216775	-0.0224776	-0.0116319	-0.0204978	-0.00164505	-0.00300235	-0.0122409	0.00870853	-0.0137751	-0.0104773
0.728	0.0214995	0.00626005	-0.0022415	-0.0220973	-0.0124423	-0.019253	-0.00207293	-0.00174754	-0.0132618	0.00643518	-0.0150277	-0.00738956
0.729	0.0194039	0.00726245	-0.00197508	-0.0213152	-0.0133214	-0.0178294	-0.00277335	-0.00113899	-0.0140266	0.00268664	-0.0158584	-0.00445883
0.73	0.0173086	0.00785417	-0.00130723	-0.0198825	-0.014164	-0.016233	-0.00341934	-0.00138763	-0.0145294	-0.00217907	-0.0161989	-0.00217644
0.731	0.0155192	0.00792871	-0.000370918	-0.0177506	-0.0148738	-0.014701	-0.00381821	-0.00228502	-0.0148205	-0.00737574	-0.0159124	-0.000732385
0.732	0.0142763	0.00746046	0.000527966	-0.0151631	-0.0155004	-0.0134786	-0.00409826	-0.00348276	-0.0147968	-0.0124935	-0.0149213	-3.01e-05
0.733	0.0137035	0.00656781	0.00111488	-0.0123635	-0.0160192	-0.0126719	-0.00457357	-0.0047826	-0.0143137	-0.0174831	-0.0133945	0.000143047
0.734	0.0137896	0.00549874	0.00128327	-0.00952688	-0.0162496	-0.0122371	-0.0053444	-0.00604255	-0.0134632	-0.0218472	-0.0116254	-0.000106353
0.735	0.0143936	0.00450022	0.00111755	-0.00695374	-0.0161069	-0.0121368	-0.00627343	-0.00697861	-0.012478	-0.0248093	-0.00984764	-0.000821294
0.736	0.0153159	0.00372836	0.000840762	-0.00506446	-0.015692	-0.0124376	-0.00725216	-0.00730656	-0.0113976	-0.0262354	-0.00815768	-0.00198594
0.737	0.016327	0.00327205	0.000600338	-0.00418939	-0.0152045	-0.0131175	-0.00818236	-0.00699014	-0.0101735	-0.0265606	-0.00658253	-0.00337132
0.738	0.0170811	0.00314661	0.000375713	-0.00445802	-0.0148493	-0.0140056	-0.0088749	-0.00627412	-0.00901248	-0.0259984	-0.00517235	-0.00480482
0.739	0.0172747	0.00326313	0.00014056	-0.0058601	-0.0147185	-0.0150068	-0.00925253	-0.00543301	-0.00820903	-0.0244701	-0.00399015	-0.00634685
0.74	0.0169023	0.00349467	-6.06e-05	-0.00821595	-0.0147561	-0.0161426	-0.0094149	-0.00443141	-0.00778322	-0.0221697	-0.00308459	-0.00795703
0.741	0.0161309	0.00378975	-0.000126344	-0.0111508	-0.014898	-0.0173321	-0.00937382	-0.00312552	-0.00759762	-0.0196532	-0.00251327	-0.00937166
0.742	0.0150509	0.00415357	2.1e-05	-0.0143117	-0.0151663	-0.0183201	-0.00896458	-0.00167992	-0.00759535	-0.0173482	-0.00237841	-0.0104329
0.743	0.0136734	0.00456749	0.000331722	-0.0175623	-0.0156161	-0.018857	-0.00808481	-0.00043764	-0.00779163	-0.0153115	-0.00270084	-0.0111906
0.744	0.0121173	0.00498679	0.000690938	-0.0209197	-0.0162787	-0.0189618	-0.00695217	0.000406355	-0.00817062	-0.01354	-0.00332285	-0.0117057
0.745	0.010635	0.00534769	0.000974721	-0.0243414	-0.0171674	-0.0189144	-0.00600864	0.000867358	-0.00859818	-0.0123845	-0.00408724	-0.0120203
0.746	0.00945918	0.00557884	0.00108379	-0.0276393	-0.0182455	-0.0189002	-0.00546734	0.00104244	-0.00885356	-0.0122745	-0.00495471	-0.0122541
0.747	0.00877339	0.00566179	0.000997406	-0.0305649	-0.0193543	-0.0188549	-0.0051932	0.000973436	-0.00888459	-0.0129788	-0.00588509	-0.0125315
0.748	0.00868792	0.00562323	0.000729206	-0.0328354	-0.0202836	-0.0186389	-0.00509211	0.000687554	-0.00894041	-0.01375	-0.00673466	-0.0127848
0.749	0.00912713	0.00547988	0.000398391	-0.0340849	-0.0209611	-0.018191	-0.00518899	0.000272066	-0.00923385	-0.014182	-0.00728153	-0.0127683
0.75	0.00992925	0.00526176	0.000228494	-0.0337511	-0.0214589	-0.0175536	-0.00532419	-0.000199494	-0.00966581	-0.0143896	-0.00740253	-0.0123587
0.751	0.0109887	0.00501476	0.000261622	-0.031169	-0.0217652	-0.0168818	-0.00515339	-0.000691659	-0.0100072	-0.0143893	-0.00727503	-0.0116672
0.752	0.0121605	0.00476553	0.000355437	-0.026174	-0.0217263	-0.0163708	-0.00447581	-0.00113445	-0.0101256	-0.0137749	-0.00721446	-0.0108441
0.753	0.013244	0.00447156	0.000423845	-0.0194298	-0.0213301	-0.0159668	-0.00337205	-0.00140579	-0.00999263	-0.01225	-0.00734043	-0.0100207
0.754	0.0140231	0.00405292	0.000437648	-0.0120325	-0.0208157	-0.0153851	-0.00200125	-0.0013874	-0.00955271	-0.010151	-0.00757774	-0.00938961
0.755	0.0142842	0.00351576	0.000366197	-0.00500947	-0.0203641	-0.0146299	-0.000430932	-0.000981981	-0.00868745	-0.00807458	-0.00783265	-0.0090899
0.756	0.0140066	0.00293608	0.000173102	0.000984083	-0.0200181	-0.0140801	0.00120643	-0.000199325	-0.00749252	-0.00622458	-0.00807284	-0.00914679
0.757	0.0133842	0.00241779	-0.000225043	0.00572479	-0.0198942	-0.0139411	0.00259028	0.000709129	-0.00634941	-0.00458154	-0.0082369	-0.00957233
0.758	0.0125588	0.00207163	-0.0009059	0.00927462	-0.0201009	-0.013967	0.00345615	0.00143497	-0.00546216	-0.00350712	-0.00817311	-0.0102395
0.759	0.0115563	0.0019524	-0.00179043	0.0117558	-0.0205618	-0.0138013	0.00373524	0.00185142	-0.00475189	-0.00342632	-0.0078366	-0.0108112
0.76	0.0104524	0.00209098	-0.00264095	0.0130283	-0.0210658	-0.0134019	0.00345615	0.00195631	-0.00424676	-0.00399014	-0.00739946	-0.0110005
0.761	0.00937839	0.00249907	-0.00322352	0.0126046	-0.0214422	-0.0129499	0.00282659	0.00182126	-0.00407876	-0.00445141	-0.00706924	-0.0107353
0.762	0.00840645	0.00306694	-0.00342892	0.0102605	-0.021694	-0.0124963	0.00230692	0.00159004	-0.00421747	-0.00467785	-0.0069127	-0.0100961
0.763	0.00757643	0.00356491	-0.00332634	0.00651501	-0.0218962	-0.012042	0.0022353	0.00131681	-0.00448032	-0.00491347	-0.00687175	-0.00922813
0.764	0.00698347	0.00382063	-0.00306293	0.00214523	-0.0220132	-0.0117717	0.00251508	0.000916893	-0.00470671	-0.00497494	-0.00689345	-0.00824099
0.765	0.00671169	0.00385037	-0.00267095	-0.0023681	-0.0219722	-0.0118648	0.00293393	0.000367864	-0.00481826	-0.00448034	-0.00690746	-0.00716925
0.766	0.00665809	0.00379592	-0.00207213	-0.0067707	-0.0217898	-0.0122476	0.00340578	-0.000231832	-0.00478615	-0.00355653	-0.00669615	-0.00610078
0.767	0.00654769	0.00377489	-0.00121858	-0.0108734	-0.0214834	-0.0126998	0.00378922	-0.000786931	-0.00464837	-0.00270845	-0.00605714	-0.0052802
0.768	0.00617425	0.0038126	-0.000168508	-0.0145318	-0.0210197	-0.0130698	0.00389019	-0.00124727	-0.00447583	-0.00209238	-0.00503648	-0.00492295
0.769	0.00556447	0.00390265	0.000963069	-0.0177698	-0.0204313	-0.0133605	0.00365965	-0.00158826	-0.00423738	-0.00154925	-0.00380388	-0.00498613
0.77	0.00493361	0.00406204	0.00206665	-0.0209915	-0.0197993	-0.0136772	0.00318059	-0.00176808	-0.0037795	-0.00121133	-0.00247361	-0.0053223
0.771	0.00450967	0.00430522	0.00301784	-0.0246311	-0.0190912	-0.0139986	0.00256393	-0.0016528	-0.00300162	-0.0013064	-0.00122428	-0.00586751
0.772	0.00443282	0.00457866	0.00370096	-0.0285647	-0.0182465	-0.0141464	0.00190525	-0.00111761	-0.00199262	-0.0016551	-0.000338845	-0.00655058
0.773	0.00475481	0.00475482	0.00405259	-0.0322154	-0.0173779	-0.0141419	0.00119507	-0.000264821	-0.000935581	-0.00196095	0.000108671	-0.00729187
0.774	0.0054013	0.00474905	0.00400906	-0.0350191	-0.0166796	-0.0141941	0.000407493	0.000655647	9.65e-05	-0.00217934	0.000334296	-0.00806455
0.775	0.00625557	0.00458156	0.003528	-0.0366511	-0.0162554	-0.0142947	-0.000346602	0.00147665	0.00108482	-0.00234128	0.000507189	-0.00883961
0.776	0.00727785	0.00427033	0.00270131	-0.0370587	-0.0160524	-0.0143012	-0.000939851	0.00211472	0.00186944	-0.00254095	0.000594921	-0.00955007
0.777	0.00838215	0.00375553	0.0017064	-0.0363842	-0.0157143	-0.0143275	-0.00136411	0.00250206	0.00227485	-0.00313627	0.000515837	-0.0101304
0.778	0.00935317	0.00298931	0.000760947	-0.0348205	-0.0147456	-0.0145933	-0.00166121	0.00257573	0.00225305	-0.0043687	0.000243428	-0.010583
0.779	0.0100127	0.00202003	0.00014372	-0.03256	-0.0130121	-0.0150333	-0.00175659	0.00226898	0.00182555	-0.0058646	-0.000207729	-0.0109344
0.78	0.0103	0.00093063	-1.21e-05	-0.0297701	-0.0107849	-0.01542	-0.00160234	0.00153821	0.00106466	-0.00698571	-0.000780554	-0.0111562
0.781	0.0101931	-0.000196983	0.000161689	-0.0266094	-0.00848557	-0.0156714	-0.00144648	0.000412179	7.15e-05	-0.00760899	-0.00135223	-0.011216
0.782	0.00971738	-0.00125471	0.000476457	-0.0233262	-0.00655251	-0.0157858	-0.00147649	-0.000973813	-0.00100899	-0.00818313	-0.00181107	-0.0111134
0.783	0.00898404	-0.00215516	0.000787016	-0.0201712	-0.00526996	-0.0157559	-0.00145255	-0.00242522	-0.00195566	-0.00886263	-0.002213	-0.010817
0.784	0.00815199	-0.00280786	0.000913498	-0.017304	-0.00473487	-0.0157124	-0.00113674	-0.00378128	-0.00258793	-0.00903148	-0.00267474	-0.01031
0.785	0.00737898	-0.00310908	0.000719312	-0.0149037	-0.00491785	-0.0158126	-0.000678036	-0.00496004	-0.00285218	-0.00815729	-0.00313622	-0.00970466
0.786	0.00677736	-0.00308094	0.000268121	-0.0130435	-0.00564317	-0.0159894	-0.000296372	-0.00594029	-0.00273384	-0.0067158	-0.00349208	-0.00916196
0.787	0.00636086	-0.00285411	-0.000239255	-0.0114412	-0.00669417	-0.0161002	2.57e-05	-0.00673325	-0.00223886	-0.00547984	-0.0037513	-0.00874949
0.788	0.0060587	-0.00251909	-0.000691396	-0.00952039	-0.00793899	-0.0161642	0.00028321	-0.00738497	-0.00142894	-0.00437052	-0.00395523	-0.0084657
0.789	0.00584328	-0.00212421	-0.00111459	-0.00667446	-0.00929679	-0.0162665	0.00017355	-0.00793865	-0.000368612	-0.00285608	-0.00419872	-0.00833962
0.79	0.00580768	-0.00174196	-0.00150954	-0.00264198	-0.0106963	-0.01636	-0.000593208	-0.00841766	0.000838366	-0.000687897	-0.00463574	-0.00840526
0.791	0.00605184	-0.00138114	-0.00184911	0.00230024	-0.0121428	-0.0162229	-0.00184344	-0.00880385	0.00208166	0.00230512	-0.00533415	-0.00858323
0.792	0.00656713	-0.000907932	-0.00216644	0.00749077	-0.0136988	-0.015561	-0.00303984	-0.00897297	0.00339806	0.00636575	-0.00621953	-0.00870122
0.793	0.00730782	-0.000262467	-0.00248591	0.0121617	-0.0153211	-0.0142929	-0.00374683	-0.00880672	0.00479632	0.0114257	-0.00712535	-0.00861386
0.794	0.00821312	0.00043815	-0.00282753	0.0157998	-0.0168697	-0.0127705	-0.00387451	-0.00828752	0.00599024	0.0168163	-0.00786908	-0.00828086
0.795	0.00913734	0.00111901	-0.00324276	0.0183493	-0.0181817	-0.0114021	-0.00352404	-0.00736594	0.00659852	0.0215693	-0.00838036	-0.00778071
0.796	0.00996423	0.00181205	-0.00368772	0.0200785	-0.0190166	-0.0101834	-0.00277011	-0.00592883	0.00648678	0.0250453	-0.00871509	-0.00719299
0.797	0.0107219	0.00257194	-0.00398814	0.0213078	-0.0192139	-0.00898339	-0.0017502	-0.00395234	0.00579026	0.02697	-0.00887103	-0.00654854
0.798	0.0114945	0.00340483	-0.0039752	0.0221506	-0.0187918	-0.00792394	-0.000748304	-0.00154969	0.00474234	0.0270075	-0.00874933	-0.00596759
0.799	0.0123292	0.00415931	-0.00359052	0.0224118	-0.0177313	-0.0071567	2.3e-05	0.00114634	0.0035204	0.0248337	-0.00833027	-0.00564456
0.8	0.013201	0.00463343	-0.00289533	0.0217274	-0.0160408	-0.00665954	0.000530376	0.00395934	0.00222631	0.0204991	-0.00775283	-0.00563347
0.801	0.0140384	0.00478715	-0.0020023	0.0198555	-0.0139004	-0.00642533	0.000849918	0.00650403	0.00107583	0.0145591	-0.00724385	-0.00574773
0.802	0.0148106	0.00465726	-0.0010077	0.0169295	-0.0115015	-0.00654213	0.00114717	0.0083384	0.000427389	0.00794379	-0.00690075	-0.00578729
0.803	0.0154773	0.0042418	-6.87e-06	0.013286	-0.00902902	-0.00691075	0.00151739	0.00931744	0.00044121	0.0014959	-0.00659482	-0.00581363
0.804	0.0159347	0.00361001	0.000833093	0.00915953	-0.00676309	-0.00713318	0.00185993	0.00953779	0.000932035	-0.00442709	-0.0062781	-0.00599354
0.805	0.016134	0.00295699	0.00130367	0.00493921	-0.00498447	-0.0069162	0.00208378	0.00906312	0.00162593	-0.0097124	-0.00608529	-0.00636875
0.806	0.0160831	0.00246364	0.00131431	0.00139294	-0.00385504	-0.00648926	0.00220304	0.00794339	0.00241121	-0.0139385	-0.00608685	-0.00693012
0.807	0.0157437	0.00223827	0.000952442	-0.000820862	-0.00339961	-0.00641511	0.00216267	0.00630331	0.00332715	-0.0165014	-0.0062387	-0.00766423
0.808	0.0150608	0.00235562	0.000382261	-0.00158354	-0.0035511	-0.00682179	0.00177865	0.00440234	0.00437058	-0.0174843	-0.00650097	-0.00844978
0.809	0.0140267	0.00278067	-0.000234344	-0.00103203	-0.0042697	-0.00722322	0.00094549	0.00262391	0.00540981	-0.0177716	-0.00691639	-0.00904202
0.81	0.0126717	0.00336965	-0.000720528	0.000714878	-0.00558515	-0.00739278	-9.52e-05	0.00115984	0.0062331	-0.0178952	-0.00751437	-0.00924549
0.811	0.0111199	0.00394381	-0.000925737	0.00344402	-0.00742444	-0.00759903	-0.000989288	-7.72e-05	0.00659011	-0.0175737	-0.00816498	-0.00900761
0.812	0.00964007	0.00434508	-0.00081775	0.00686108	-0.0095395	-0.00786808	-0.00177623	-0.0010801	0.00632469	-0.0166883	-0.00856279	-0.00838383
0.813	0.00851426	0.00454023	-0.000464759	0.0106449	-0.0117121	-0.00796281	-0.00263203	-0.00166891	0.00552504	-0.0157334	-0.00835968	-0.00756247
0.814	0.00794112	0.0046198	2.62e-05	0.0144172	-0.0137865	-0.00795559	-0.00326673	-0.00180105	0.00448001	-0.0150814	-0.00743027	-0.00673738
0.815	0.00803527	0.00471214	0.000531298	0.0178725	-0.0155305	-0.00812036	-0.00324579	-0.00164898	0.00345599	-0.0145576	-0.00597501	-0.00597967
0.816	0.00874712	0.00492598	0.000948846	0.0208734	-0.0167064	-0.00843557	-0.0026336	-0.00136477	0.00254546	-0.0139789	-0.00436024	-0.0053578
0.817	0.00981389	0.00526831	0.00126749	0.0232871	-0.0172151	-0.00871818	-0.0017614	-0.000935575	0.00181454	-0.013531	-0.00296904	-0.00491906
0.818	0.0108829	0.00562529	0.00155728	0.0247963	-0.0170671	-0.00904586	-0.000761018	-0.00034344	0.00139821	-0.0133422	-0.00206275	-0.00460029
0.819	0.0117008	0.00593716	0.00188959	0.0249943	-0.0161346	-0.00955332	0.000316019	0.00036703	0.00130599	-0.0132806	-0.00164377	-0.00432953
0.82	0.0121698	0.00631867	0.00226678	0.0236561	-0.0141081	-0.0101323	0.00132206	0.00122829	0.00139064	-0.0132933	-0.00159093	-0.0040351
0.821	0.0122629	0.00690864	0.00259781	0.0208481	-0.0109173	-0.0106577	0.00213895	0.00225794	0.00152217	-0.01339	-0.00181011	-0.0036187
0.822	0.0119701	0.00773916	0.00278476	0.0168284	-0.00705135	-0.0112132	0.00275099	0.00329322	0.0016442	-0.0133628	-0.002143	-0.00308367
0.823	0.0113484	0.00876821	0.0028054	0.0121164	-0.00333503	-0.0118264	0.00315955	0.00408617	0.00179532	-0.0129782	-0.00244542	-0.00258573
0.824	0.0105572	0.00986378	0.00270307	0.00775227	-0.000468901	-0.0121317	0.00341655	0.00452282	0.00208835	-0.012302	-0.00276328	-0.00234348
0.825	0.00975186	0.0108252	0.00256039	0.00494916	0.0011486	-0.0117218	0.00373762	0.00470598	0.00253891	-0.0114758	-0.00310047	-0.00250348
0.826	0.00900251	0.0114752	0.00244483	0.00417768	0.00144736	-0.0107109	0.00431371	0.00475349	0.00299811	-0.0104592	-0.00316435	-0.00300085
0.827	0.00835996	0.0116316	0.00243932	0.00495594	0.000738125	-0.0094491	0.00502147	0.00468986	0.00332693	-0.00933551	-0.00274596	-0.00355576
0.828	0.00789973	0.0111942	0.00267665	0.00649415	-0.000513759	-0.00797137	0.00552481	0.00468119	0.00349086	-0.00840721	-0.00205988	-0.00382887
0.829	0.00763334	0.010318	0.00320402	0.00820076	-0.00200652	-0.0062158	0.00562385	0.00489728	0.00342723	-0.00766067	-0.00137937	-0.00364171
0.83	0.00743251	0.00929024	0.00396198	0.00979474	-0.00358266	-0.00434205	0.00530878	0.00510146	0.00299082	-0.00669005	-0.000739292	-0.00309497
0.831	0.00713619	0.00831562	0.00481486	0.0111343	-0.00514013	-0.00250551	0.00451563	0.0049284	0.00212044	-0.00538382	-0.000115917	-0.00246579
0.832	0.00667843	0.00749255	0.00554715	0.012007	-0.00665752	-0.000730434	0.00313076	0.00440103	0.00097666	-0.00408676	0.000365657	-0.00201966
0.833	0.00611927	0.00687577	0.00601022	0.0123535	-0.00806409	0.000870945	0.00130156	0.00381675	-0.000132942	-0.00290778	0.000491741	-0.00184657
0.834	0.00564285	0.00649934	0.0061653	0.0124599	-0.00917163	0.00204797	-0.000484781	0.00334395	-0.000905447	-0.00142519	0.000293321	-0.00189516
0.835	0.00542455	0.00635772	0.00604816	0.0125601	-0.00988723	0.00261595	-0.00180788	0.00300539	-0.00110383	0.000639316	0.000123216	-0.00211817
0.836	0.0054689	0.00636052	0.00582062	0.0125443	-0.0103048	0.00260832	-0.00264196	0.00290262	-0.000634136	0.00288291	0.000232048	-0.00248393
0.837	0.00569755	0.00634043	0.00564431	0.0122041	-0.0105306	0.00216494	-0.00312697	0.00317475	0.000360361	0.00470125	0.000521048	-0.00303647
0.838	0.00603129	0.00621566	0.0054695	0.0114063	-0.0105975	0.00121878	-0.00325503	0.00385369	0.0015841	0.0060021	0.000781145	-0.00384985
0.839	0.00633224	0.00606678	0.0051665	0.0101417	-0.010528	-0.000405021	-0.00300802	0.00488217	0.0027061	0.00706767	0.000917423	-0.00476546
0.84	0.00656508	0.0059655	0.00476447	0.00872296	-0.0103358	-0.00243791	-0.00260979	0.00611445	0.0034124	0.00780773	0.000937217	-0.00550882
0.841	0.0069068	0.00583885	0.00437912	0.00770975	-0.0100343	-0.00415104	-0.00226447	0.00732832	0.00360517	0.00775425	0.000885516	-0.00608756
0.842	0.00746958	0.00555097	0.00410824	0.007509	-0.00971878	-0.00503076	-0.00180093	0.00839097	0.00351492	0.0069067	0.00077125	-0.0066659
0.843	0.00805613	0.00505799	0.00403532	0.00813636	-0.00957103	-0.00522433	-0.00101449	0.00927916	0.00337471	0.0058124	0.000602868	-0.00717755
0.844	0.00835265	0.00440885	0.00415027	0.00932262	-0.00975351	-0.00528947	-0.000179237	0.00992808	0.00314131	0.00471781	0.000495753	-0.00741822
0.845	0.0082872	0.00366203	0.00429418	0.0107774	-0.0102633	-0.00560149	0.00019338	0.0102983	0.00268414	0.00330321	0.000557213	-0.00735446
0.846	0.00801209	0.00293817	0.00425712	0.012435	-0.0109432	-0.0060722	6.22e-05	0.0104236	0.00202618	0.00141164	0.000735275	-0.00709591
0.847	0.0076873	0.00242964	0.00395264	0.0144642	-0.0116118	-0.00647469	-2.91e-05	0.0102636	0.00132907	-0.000455987	0.000904906	-0.00667408
0.848	0.0075082	0.00225845	0.00347384	0.0168984	-0.0120552	-0.00673609	0.000323872	0.00977241	0.000744533	-0.00176413	0.000989395	-0.00606739
0.849	0.00773677	0.00243697	0.00296394	0.0194374	-0.012069	-0.00668657	0.00090249	0.00904811	0.000359078	-0.00258678	0.000972216	-0.00536609
0.85	0.00847801	0.00291308	0.00248562	0.0216714	-0.0116204	-0.00605732	0.00136208	0.00823173	0.000267291	-0.00316844	0.000818061	-0.00475798
0.851	0.00957594	0.00360425	0.00206059	0.0233237	-0.0108607	-0.00498264	0.00186429	0.00743336	0.000589113	-0.00323359	0.000474802	-0.00440361
0.852	0.0108076	0.00448059	0.00176216	0.0244014	-0.00996678	-0.00384418	0.0028322	0.00681255	0.00137315	-0.00220899	0.000110605	-0.00432918
0.853	0.0120077	0.00553263	0.00164872	0.0251715	-0.00899791	-0.00264738	0.00425802	0.00653329	0.00253524	6.47e-06	9.94e-05	-0.00446462
0.854	0.0130391	0.00660386	0.00168474	0.0258954	-0.00792206	-0.00116862	0.00569575	0.00662479	0.00395639	0.00305903	0.000522796	-0.00479291
0.855	0.0137535	0.00745807	0.00176016	0.0267018	-0.00672469	0.000465274	0.00688792	0.00701727	0.00557927	0.0067836	0.000960595	-0.00527878
0.856	0.013995	0.00798638	0.00173554	0.0276109	-0.00546064	0.00171449	0.00793928	0.0075981	0.00734546	0.0111923	0.000926149	-0.00577494
0.857	0.0137313	0.00821056	0.00155812	0.0285209	-0.00426754	0.00220764	0.00883743	0.00820201	0.00913779	0.0159975	0.000313575	-0.00626401
0.858	0.0131376	0.00824444	0.00133529	0.0293822	-0.00322565	0.00222157	0.00925066	0.00872398	0.0108156	0.0207263	-0.000641958	-0.00692569
0.859	0.0124504	0.0082953	0.0012241	0.0302365	-0.00207869	0.00229646	0.00900289	0.00907382	0.0122067	0.0253265	-0.00172109	-0.00781703
0.86	0.0118165	0.00856595	0.0013178	0.0310315	-0.000232602	0.00258056	0.00837958	0.00907466	0.0131078	0.0301318	-0.0028762	-0.00869889
0.861	0.011318	0.00909517	0.00161775	0.031729	0.0027501	0.00296287	0.00766044	0.00870893	0.013393	0.0351178	-0.0040006	-0.00918489
0.862	0.0110323	0.00976787	0.00193853	0.0323906	0.00666569	0.00361701	0.00666945	0.00812119	0.0130977	0.0396774	-0.00483839	-0.00906722
0.863	0.0110047	0.01051	0.00196818	0.0329905	0.0107461	0.00480138	0.00513996	0.00734698	0.0124365	0.0431439	-0.00529476	-0.0084671
0.864	0.0112174	0.0113184	0.00157188	0.033395	0.0141042	0.00624069	0.00332245	0.00646307	0.0116732	0.0452149	-0.00552995	-0.00760551
0.865	0.0115795	0.0121415	0.000840498	0.0334724	0.0161063	0.0073663	0.00184836	0.00568219	0.0108615	0.0458399	-0.00562772	-0.00662572
0.866	0.0119291	0.0128977	-0.000119191	0.0330877	0.0165518	0.00798782	0.00101572	0.00509221	0.00993704	0.0449696	-0.0054606	-0.00567213
0.867	0.0121295	0.0135718	-0.0012195	0.0321999	0.0156257	0.0081941	0.000627948	0.00464292	0.00896882	0.0427291	-0.00493759	-0.00489186
0.868	0.0121564	0.0142177	-0.00228437	0.0310489	0.0136918	0.00793962	0.000544236	0.00439136	0.0080292	0.0395806	-0.00414419	-0.00432836
0.869	0.0120678	0.0149675	-0.00305994	0.0300387	0.0111576	0.00713154	0.000905386	0.00448734	0.00704911	0.0358692	-0.00324352	-0.00392954
0.87	0.0118974	0.015989	-0.00338413	0.0293741	0.00837968	0.00590983	0.00181766	0.00489507	0.00597196	0.0315124	-0.00242047	-0.00365472
0.871	0.0115784	0.0173226	-0.00328679	0.0289777	0.00551943	0.00462872	0.0030834	0.00541848	0.00487585	0.0264695	-0.00179682	-0.00353099
0.872	0.0110621	0.018887	-0.00285029	0.0287701	0.00261461	0.00351811	0.00428784	0.00597721	0.00384509	0.0211979	-0.00130309	-0.00357003
0.873	0.0104866	0.0205348	-0.00207828	0.0288623	-0.000171183	0.00252954	0.00514262	0.00664001	0.00291747	0.0163413	-0.000822412	-0.00369614
0.874	0.0100649	0.0220642	-0.000991517	0.0293998	-0.00260266	0.00164739	0.00557332	0.00746946	0.00218715	0.0121217	-0.000386903	-0.00383223
0.875	0.00985882	0.0233521	0.000246399	0.0303285	-0.00458294	0.00102085	0.00552475	0.00841284	0.00175365	0.00838125	-6.57e-05	-0.00394386
0.876	0.00979197	0.0243762	0.00138858	0.031431	-0.00610491	0.00067612	0.00498529	0.00932366	0.00168427	0.00502845	0.000175266	-0.00393218
0.877	0.00976222	0.0251033	0.00230487	0.0324945	-0.00715438	0.000464251	0.00407912	0.0100297	0.00203381	0.00203647	0.000414573	-0.00363225
0.878	0.00968137	0.0254946	0.0030718	0.0333605	-0.00775573	0.000381594	0.00299074	0.0103324	0.00278161	-0.000739612	0.000688796	-0.00297261
0.879	0.00951126	0.0255877	0.00379155	0.0339588	-0.00797952	0.00058055	0.00190873	0.0100295	0.00379768	-0.00341181	0.000998928	-0.00199745
0.88	0.0092217	0.0254925	0.00440107	0.0343664	-0.00781665	0.00102948	0.000976135	0.00912041	0.00483126	-0.00588839	0.00133716	-0.000762218
0.881	0.00876038	0.0253097	0.00476415	0.0346848	-0.00715205	0.00150869	0.000255763	0.00796619	0.00562664	-0.00806362	0.00162125	0.000647293
0.882	0.00813332	0.0251127	0.00487006	0.0349322	-0.00594476	0.00179378	-0.000157022	0.00700327	0.00606141	-0.00995269	0.00169368	0.0020591
0.883	0.00739166	0.0249618	0.00486343	0.0351774	-0.00431105	0.00165938	-6.25e-05	0.00634967	0.00609052	-0.0113775	0.0015012	0.00325265
0.884	0.00655466	0.0248235	0.00491039	0.0355808	-0.00248569	0.000879094	0.000597329	0.00590502	0.00575506	-0.0119148	0.00122547	0.00404959
0.885	0.00565005	0.0245819	0.00506148	0.036186	-0.000779882	-0.000654701	0.00156963	0.0056793	0.00528891	-0.0114833	0.00121708	0.0044306
0.886	0.0047559	0.0241911	0.00525222	0.0368643	0.000602575	-0.00268121	0.00255196	0.00577538	0.00504429	-0.0105718	0.00173748	0.00450649
0.887	0.00391091	0.0237002	0.00541267	0.0375364	0.00165339	-0.00463075	0.00345154	0.00617285	0.00521398	-0.00966295	0.0027723	0.00436082
0.888	0.00310435	0.0231713	0.00553185	0.03816	0.00239958	-0.00613584	0.00435697	0.00676671	0.00573368	-0.00874608	0.00412454	0.00403804
0.889	0.00238462	0.0226327	0.00558453	0.0386125	0.00279065	-0.00718841	0.00530103	0.0075716	0.00652842	-0.00756475	0.0054602	0.00362273
0.89	0.00183786	0.0220872	0.00540999	0.0387968	0.00268348	-0.00779493	0.00605252	0.00864792	0.00758772	-0.00617105	0.00641773	0.00318197
0.891	0.00153617	0.0215095	0.00477277	0.0386416	0.00196817	-0.00789044	0.00626433	0.00986654	0.00883103	-0.00498224	0.00691848	0.00266542
0.892	0.00152881	0.0207819	0.00363949	0.0380954	0.000817731	-0.00756982	0.00586764	0.0110523	0.0101249	-0.00427568	0.00712191	0.00205373
0.893	0.00175448	0.0197903	0.00227383	0.0371704	-0.000416925	-0.00705414	0.00515333	0.0122291	0.0112656	-0.00384015	0.00710395	0.00148543
0.894	0.00203315	0.0186137	0.00101201	0.0358754	-0.00158664	-0.00646974	0.00445739	0.0134577	0.0119874	-0.00329687	0.00679125	0.00108588
0.895	0.00211513	0.017424	7.77e-05	0.0342803	-0.00273031	-0.00585128	0.00388733	0.0146091	0.0121778	-0.00268186	0.00614745	0.000934138
0.896	0.00177403	0.0162903	-0.000458388	0.0325808	-0.00380868	-0.00528782	0.0032714	0.0154398	0.0118845	-0.00241111	0.00530138	0.00107931
0.897	0.00106878	0.0152053	-0.000625761	0.0309495	-0.00469238	-0.00494685	0.0023725	0.0158036	0.0111829	-0.00268063	0.00446447	0.00131951
0.898	0.000314015	0.0141467	-0.00047115	0.0294402	-0.00534415	-0.00490278	0.00123055	0.015714	0.010284	-0.00326455	0.00375261	0.00131851
0.899	-0.000269139	0.0131165	-4.06e-05	0.0279893	-0.00584157	-0.00506762	0.000210333	0.0151973	0.00948432	-0.00389446	0.00317543	0.000992704
0.9	-0.000587413	0.0120912	0.000601715	0.026397	-0.00621302	-0.00540315	-0.000357602	0.0142038	0.00889487	-0.0044363	0.00278865	0.000467088
0.901	-0.000501353	0.0109081	0.00137068	0.0244281	-0.00636751	-0.00596903	-0.000455932	0.0128095	0.00849002	-0.00471466	0.00265692	-0.00016009
0.902	8.43e-05	0.00949971	0.00224525	0.0219542	-0.00620477	-0.00660145	-0.000228768	0.0113218	0.0082886	-0.00453234	0.00269839	-0.000896934
0.903	0.00108016	0.00808514	0.00330896	0.0189735	-0.00578442	-0.00680195	0.0002793	0.0100069	0.00830004	-0.00393936	0.00271598	-0.00181558
0.904	0.00229023	0.00694752	0.00460775	0.0155743	-0.0053082	-0.00618164	0.0011832	0.00895446	0.00843394	-0.00326405	0.00255226	-0.00287169
0.905	0.00350893	0.00623025	0.00601936	0.011913	-0.00499802	-0.00481739	0.00254362	0.00819761	0.00853028	-0.00276694	0.00225876	-0.00390264
0.906	0.0045827	0.00584775	0.00732374	0.0082116	-0.005038	-0.00301864	0.00414469	0.00779438	0.00846983	-0.00245599	0.00206074	-0.00487895
0.907	0.00539125	0.0056333	0.00836215	0.00477163	-0.00548534	-0.00105399	0.005706	0.00789612	0.00828922	-0.00231018	0.00201808	-0.0058878
0.908	0.00582849	0.0055839	0.00905822	0.00195316	-0.00627567	0.000825119	0.00705859	0.00859046	0.0081317	-0.00252466	0.0019027	-0.00685549
0.909	0.00591483	0.0057507	0.00936811	-1.53e-05	-0.00727695	0.00242702	0.00796903	0.00965452	0.0080888	-0.00343035	0.00152819	-0.00753024
0.91	0.00576549	0.00606512	0.00932441	-0.00110684	-0.00823067	0.00369794	0.00829991	0.0107327	0.00816524	-0.00504482	0.000975582	-0.00766163
0.911	0.00549177	0.00643397	0.00906331	-0.00129681	-0.00880635	0.00460598	0.00823687	0.0116164	0.00834936	-0.00690849	0.000402347	-0.00707953
0.912	0.00523508	0.00686929	0.00872955	-0.000630039	-0.00884361	0.00513616	0.0079628	0.0122003	0.00867892	-0.00860031	-0.000110117	-0.00582155
0.913	0.0050891	0.00744706	0.00838812	0.000657411	-0.00838052	0.00539669	0.00745102	0.0124551	0.00915049	-0.0100648	-0.000437272	-0.00423474
0.914	0.00501089	0.00823788	0.0080715	0.00237812	-0.00741213	0.00552347	0.00672757	0.0125331	0.00952907	-0.0113541	-0.00042687	-0.00276948
0.915	0.00493705	0.00925808	0.00783419	0.004419	-0.00591191	0.00563341	0.00606945	0.0125926	0.0094534	-0.0123198	-1.78e-05	-0.00174576
0.916	0.00488299	0.0103658	0.00769998	0.00647431	-0.00404239	0.00582169	0.00588155	0.0125713	0.00884595	-0.012749	0.000759235	-0.00127591
0.917	0.00492563	0.0113189	0.00763753	0.00801426	-0.00209392	0.00603908	0.00637936	0.0123256	0.00803551	-0.0127571	0.00179443	-0.00121193
0.918	0.00516941	0.0119244	0.00761087	0.00849167	-0.000435567	0.00615445	0.00735204	0.0117892	0.00729856	-0.0126539	0.00296318	-0.00134432
0.919	0.00573683	0.012083	0.00759295	0.00758138	0.000526486	0.00617556	0.00836454	0.0110006	0.00655311	-0.0125406	0.00409501	-0.00167606
0.92	0.00673228	0.0118021	0.00752062	0.00537763	0.000691986	0.00628858	0.00923038	0.01011	0.00571856	-0.0123752	0.00489335	-0.00225539
0.921	0.00820806	0.0111661	0.00732868	0.00240709	0.000310499	0.00666619	0.00999402	0.00925774	0.0050603	-0.012209	0.00512713	-0.00293197
0.922	0.010189	0.0103011	0.00707684	-0.000667347	-0.00032138	0.0072303	0.0105091	0.0084628	0.00494365	-0.0120733	0.00481057	-0.00344192
0.923	0.0126372	0.009325	0.00693635	-0.00342244	-0.00087929	0.00769069	0.0104791	0.00773126	0.0053967	-0.0117659	0.00407705	-0.00359272
0.924	0.0153941	0.0083382	0.00703823	-0.00573031	-0.00110276	0.00787779	0.0099094	0.00714122	0.006096	-0.0110175	0.00308552	-0.0034819
0.925	0.0181923	0.00745166	0.00741349	-0.00754446	-0.0010814	0.00788156	0.0091211	0.00669931	0.00670562	-0.00984659	0.00209647	-0.00348721
0.926	0.020738	0.00669823	0.00807738	-0.00882034	-0.00111424	0.00785204	0.00836987	0.00630703	0.00711491	-0.0085058	0.00131172	-0.00373846
0.927	0.0228387	0.00601368	0.00901325	-0.00959936	-0.00132644	0.00783728	0.00771551	0.00592545	0.00738219	-0.00703958	0.000689002	-0.00388914
0.928	0.0244438	0.0053815	0.00998774	-0.0100042	-0.00162262	0.00787231	0.00712182	0.00563726	0.00749237	-0.00529355	0.000209494	-0.00369479
0.929	0.0255967	0.00485221	0.0106237	-0.0100599	-0.00180827	0.00805315	0.00660834	0.005595	0.00734159	-0.00344099	-2.68e-05	-0.00332375
0.93	0.0263805	0.00443261	0.0107069	-0.00958183	-0.001521	0.00831843	0.00633795	0.00585876	0.00694279	-0.00204864	-9.38e-05	-0.00297552
0.931	0.0268673	0.00410651	0.0102699	-0.0084737	-0.000213765	0.00840381	0.00643726	0.00623221	0.00641199	-0.00149906	-0.000166457	-0.00266157
0.932	0.0271022	0.00390824	0.00947677	-0.00699786	0.00262068	0.00822416	0.00679599	0.00645822	0.00591488	-0.00154048	-0.000250475	-0.00230944
0.933	0.0271263	0.00388405	0.00855494	-0.00555125	0.00711726	0.0079439	0.00723093	0.00654016	0.00567951	-0.00160758	-0.000175621	-0.00187911
0.934	0.0270266	0.00405041	0.00775649	-0.00446697	0.0127278	0.00759304	0.00775348	0.0067447	0.00586016	-0.00153113	0.000199391	-0.00142149
0.935	0.0269458	0.0043644	0.00725805	-0.00407578	0.0183191	0.00697998	0.0085193	0.00734016	0.00650082	-0.00164838	0.00076397	-0.000977965
0.936	0.0270218	0.00471691	0.00709147	-0.00472038	0.0227367	0.00608925	0.00958652	0.00828835	0.00754433	-0.00215792	0.00130617	-0.000542017
0.937	0.0273237	0.00504392	0.00714792	-0.0066907	0.0252448	0.00529192	0.0107767	0.00932587	0.00867871	-0.00265399	0.00180337	-0.000178335
0.938	0.0277842	0.00537367	0.00723473	-0.0101344	0.0255884	0.00495748	0.0117846	0.0103467	0.00955543	-0.0026193	0.00228235	-8.64e-06
0.939	0.028199	0.00571318	0.00720268	-0.0146081	0.0239451	0.00507279	0.012364	0.011439	0.0102323	-0.00213528	0.00259736	-9.4e-05
0.94	0.0283488	0.00599053	0.00701496	-0.0187211	0.0207856	0.00545314	0.0123361	0.0126702	0.010962	-0.00173425	0.00262655	-0.000345465
0.941	0.0281011	0.00618418	0.00670689	-0.0211109	0.016649	0.00605905	0.0116843	0.0139847	0.0117254	-0.00166803	0.00251279	-0.000595378
0.942	0.0273672	0.0064593	0.00633905	-0.0214989	0.012057	0.00687677	0.0106987	0.0152335	0.012313	-0.00162087	0.00251645	-0.000804222
0.943	0.026057	0.00700086	0.00597507	-0.0204112	0.00748854	0.00775549	0.00968245	0.0162841	0.012701	-0.00125713	0.00270848	-0.00102184
0.944	0.024238	0.00774066	0.00567515	-0.0186952	0.00337113	0.00846819	0.00869174	0.0170831	0.0131419	-0.000737334	0.00295278	-0.00116883
0.945	0.0221676	0.00848409	0.00548812	-0.0171959	4.08e-05	0.00887411	0.00782398	0.0176691	0.0137639	-0.000371972	0.00323807	-0.00109461
0.946	0.0200129	0.00919848	0.00548446	-0.0164127	-0.00240412	0.00898936	0.00742623	0.0181554	0.014275	-4.44e-05	0.00378989	-0.000787504
0.947	0.0178577	0.00999042	0.00574718	-0.0164812	-0.00408489	0.00874457	0.00773239	0.018586	0.014405	0.000559804	0.00466476	-0.0003389
0.948	0.0159112	0.0108915	0.00628955	-0.0172687	-0.00512259	0.00799089	0.00849541	0.0188119	0.0143462	0.00138298	0.00558154	0.000287565
0.949	0.0144272	0.011761	0.00707202	-0.0184785	-0.00557045	0.00684596	0.00923504	0.0185177	0.0143757	0.00212069	0.00632683	0.00130535
0.95	0.0136012	0.0124493	0.00800829	-0.0198789	-0.00553328	0.00555871	0.00979989	0.0174687	0.014403	0.00264598	0.00693689	0.00276644
0.951	0.0134976	0.0129625	0.00888078	-0.0213475	-0.0051442	0.00415556	0.0105186	0.0158505	0.0142614	0.00297788	0.00745728	0.00442028
0.952	0.0139593	0.0133933	0.00943286	-0.0226874	-0.00454154	0.00256582	0.0116543	0.0141568	0.0140766	0.00312276	0.00780517	0.0060249
0.953	0.0147238	0.0138067	0.00960266	-0.0236397	-0.00391921	0.000917248	0.0128877	0.0127514	0.0140512	0.00310955	0.00784091	0.00742099
0.954	0.0155927	0.0142082	0.00950088	-0.024012	-0.00334948	-0.000502487	0.0136749	0.0117367	0.0141982	0.0029937	0.00747606	0.00840507
0.955	0.016467	0.01453	0.00925121	-0.0236643	-0.00275876	-0.00144964	0.0138717	0.0110974	0.0143944	0.00290617	0.00673712	0.00877237
0.956	0.0173097	0.0146397	0.00890828	-0.0225904	-0.00215765	-0.00186579	0.0136908	0.0108043	0.0144931	0.00307362	0.00567248	0.00838886
0.957	0.0181083	0.0143895	0.00838875	-0.0210131	-0.00163728	-0.00191841	0.013326	0.0108465	0.0144085	0.00358946	0.00422143	0.00729703
0.958	0.0188028	0.0137145	0.00762136	-0.0190668	-0.00132116	-0.00178499	0.0128437	0.0112012	0.0141697	0.00429679	0.00244108	0.00581011
0.959	0.0192594	0.0127121	0.0066711	-0.0165744	-0.00137666	-0.00145891	0.0122693	0.0118137	0.0138737	0.00491486	0.000702252	0.00436711
0.96	0.0194064	0.0115754	0.00563768	-0.0134145	-0.00181191	-0.000918501	0.0116347	0.0126316	0.0136387	0.00517381	-0.000626434	0.00332145
0.961	0.0192551	0.0104885	0.00472009	-0.00974101	-0.00237795	-0.000319177	0.0110054	0.0135655	0.0135651	0.00494663	-0.00145454	0.00287617
0.962	0.0187664	0.00957892	0.00416279	-0.00580128	-0.00283773	0.000116381	0.0105189	0.0144311	0.0135906	0.00426609	-0.00184499	0.00301701
0.963	0.0179101	0.00887474	0.00401591	-0.00183941	-0.00316109	0.000292741	0.0103326	0.0149716	0.0135016	0.00320432	-0.00182583	0.00354704
0.964	0.0167983	0.00835005	0.00424681	0.0018977	-0.00337979	0.000282281	0.0104868	0.0150005	0.0131579	0.00187944	-0.00137163	0.00429672
0.965	0.0156288	0.00801593	0.00487784	0.00518176	-0.00347176	0.00025601	0.0108241	0.0145311	0.0125456	0.000516455	-0.000471589	0.00518054
0.966	0.0145931	0.00787512	0.00583018	0.00794634	-0.00347715	0.00039627	0.0111472	0.0137077	0.0117667	-0.000621098	0.000740014	0.00607015
0.967	0.0138878	0.00788412	0.00687097	0.0103651	-0.00351377	0.000840841	0.0114415	0.0126997	0.0110269	-0.0013527	0.00192964	0.0067872
0.968	0.013593	0.00808432	0.00776271	0.0125542	-0.00358757	0.0015674	0.0118032	0.0116269	0.0104843	-0.00165699	0.00285091	0.00720285
0.969	0.0135441	0.00858545	0.00836	0.0143822	-0.00349929	0.00228029	0.012196	0.0105574	0.0102535	-0.00161745	0.00359798	0.00724628
0.97	0.0135217	0.00937527	0.00859654	0.0156561	-0.00301175	0.00267092	0.012484	0.00964004	0.0104656	-0.00130729	0.00435266	0.006929
0.971	0.0134579	0.010331	0.00845066	0.0162667	-0.00214139	0.00279406	0.0126538	0.00911384	0.0110596	-0.000790685	0.00505653	0.00637217
0.972	0.0133678	0.0113574	0.00791038	0.0162829	-0.00117182	0.00295577	0.0127695	0.00912805	0.0117419	-0.000222809	0.00548445	0.00571499
0.973	0.0132392	0.0124114	0.00698332	0.0160353	-0.000275037	0.00338007	0.0128108	0.00967052	0.0123286	0.000249389	0.0054959	0.00507139
0.974	0.0130554	0.0134231	0.00580625	0.0159846	0.000627398	0.00412618	0.012676	0.0105956	0.0128504	0.000712126	0.00513474	0.00447814
0.975	0.0128154	0.0142566	0.00465323	0.016443	0.00159614	0.00519075	0.0123566	0.0116789	0.0133645	0.00127567	0.00454568	0.00383993
0.976	0.0125062	0.0147739	0.00376003	0.017501	0.0025693	0.00652287	0.012028	0.0127767	0.0138685	0.0017025	0.00390918	0.00306045
0.977	0.0121224	0.0149509	0.0032304	0.0190941	0.00339478	0.00793988	0.0117405	0.0138592	0.0142471	0.00162001	0.00339409	0.00209235
0.978	0.0117281	0.0149198	0.00309389	0.020957	0.00388168	0.00919323	0.0112527	0.0148724	0.014344	0.00101867	0.0030489	0.000854906
0.979	0.0114271	0.0148241	0.00335702	0.0227878	0.00397013	0.0100993	0.0104411	0.0156518	0.0141892	0.000261579	0.00284022	-0.000592894
0.98	0.0112506	0.0146918	0.00396698	0.0244984	0.00378335	0.010627	0.00962008	0.016042	0.0139912	-0.000415821	0.00283641	-0.00185499
0.981	0.0111803	0.0145202	0.00482369	0.0260482	0.00350952	0.0108648	0.00922078	0.016085	0.0139304	-0.00115282	0.00317183	-0.00253182
0.982	0.0112786	0.0143391	0.00586139	0.0272756	0.00332965	0.0108159	0.00928478	0.0159265	0.0140673	-0.00204273	0.00383496	-0.00267334
0.983	0.011661	0.014159	0.00703358	0.0281245	0.00336476	0.0104294	0.00950444	0.0156158	0.0143637	-0.00276903	0.00466778	-0.00262609
0.984	0.0122974	0.0139559	0.00822587	0.0287403	0.00356086	0.00980667	0.00963459	0.0150812	0.0148004	-0.0029433	0.00545176	-0.00261576
0.985	0.0129934	0.0137216	0.00922893	0.0292472	0.00380389	0.00911428	0.00967568	0.0142866	0.0154452	-0.00262123	0.00602579	-0.00269494
0.986	0.013592	0.0135276	0.00985606	0.0296476	0.00411719	0.00845894	0.00974607	0.0133881	0.0162837	-0.00222437	0.0064225	-0.002922
0.987	0.0140238	0.0134922	0.0100478	0.0298667	0.0045666	0.00790764	0.00985516	0.0126291	0.0171005	-0.00199628	0.0066666	-0.00341357
0.988	0.0142198	0.0136578	0.00983035	0.0297695	0.00514732	0.00741723	0.0098636	0.0121417	0.0176723	-0.00173895	0.00659045	-0.00424005
0.989	0.0141189	0.0139793	0.00931488	0.0292997	0.005737	0.00689039	0.00959984	0.0119227	0.0179411	-0.00116495	0.0060427	-0.00540042
0.99	0.0137311	0.0143671	0.00873444	0.0285585	0.00608215	0.00638846	0.00886773	0.0119209	0.0179139	-0.000354552	0.00508558	-0.00692192
0.991	0.013113	0.0147113	0.00832758	0.0276645	0.00595098	0.00613695	0.00751747	0.0121021	0.0175873	0.00034042	0.00393662	-0.00883848
0.992	0.0123178	0.0149588	0.00819247	0.0267629	0.00526898	0.0063461	0.00557661	0.0124191	0.0169741	0.000746985	0.00280838	-0.0110594
0.993	0.0114273	0.0151477	0.00827403	0.026012	0.00410132	0.00699804	0.00316226	0.0128212	0.0161375	0.000965008	0.00185578	-0.0133257
0.994	0.0105075	0.0153904	0.00840106	0.0253747	0.00265643	0.00779434	0.000500828	0.0133122	0.0152125	0.00109383	0.00117813	-0.01526
0.995	0.00954862	0.0157781	0.00839218	0.0246612	0.00128964	0.00848656	-0.00196697	0.0138562	0.0142636	0.00106981	0.000733056	-0.0165323
0.996	0.00855807	0.0162311	0.00822111	0.0237381	0.000266528	0.00921745	-0.00392013	0.0142849	0.0131289	0.00073995	0.000403159	-0.0171078
0.997	0.0075856	0.0165954	0.00800307	0.0225323	-0.000416026	0.0102992	-0.00542981	0.0144627	0.0116627	4.59e-05	0.000136548	-0.0171928
0.998	0.00669623	0.0168185	0.00783289	0.0209382	-0.00082669	0.0118183	-0.00664355	0.014495	0.0101173	-0.000897104	-0.000148426	-0.0168945
0.999	0.00602995	0.0169009	0.00776961	0.0188413	-0.000944208	0.0136008	-0.0075039	0.0145563	0.00893933	-0.00187985	-0.00055258	-0.0162031
1	0.00573525	0.0168675	0.00789817	0.016234	-0.0007756	0.0152671	-0.0078714	0.0146049	0.008322	-0.00267067	-0.00102659	-0.0152932
1.001	0.00582573	0.0167921	0.00829399	0.0132602	-0.000433537	0.0163928	-0.00773343	0.0144715	0.00819243	-0.0030209	-0.00144257	-0.0145113
1.002	0.0062066	0.0167031	0.00897414	0.0100964	-7.2e-05	0.0168136	-0.00721738	0.0141269	0.00837892	-0.0026612	-0.00178973	-0.0141312
1.003	0.00679423	0.0165195	0.0099084	0.0068614	0.000223298	0.0165975	-0.00639859	0.0137471	0.00876166	-0.00149321	-0.00215218	-0.0142718
1.004	0.00756539	0.016138	0.0109915	0.00366262	0.00051611	0.0157903	-0.00523292	0.0135464	0.00928588	0.000107672	-0.0025125	-0.0148452
1.005	0.00852419	0.0155316	0.0119746	0.00060793	0.000907632	0.0143229	-0.00370423	0.013586	0.0097103	0.00152134	-0.00278322	-0.0156742
1.006	0.00966218	0.0147636	0.0126016	-0.00219384	0.0013592	0.0121705	-0.00197691	0.0136844	0.00973662	0.00250629	-0.00302696	-0.0167065
1.007	0.0109022	0.0139627	0.0128028	-0.00449887	0.00174306	0.00961385	-0.000352942	0.0135869	0.00949546	0.00331237	-0.0033415	-0.0178522
1.008	0.0120352	0.0132977	0.0126234	-0.00590661	0.00195454	0.00716694	0.000986967	0.013246	0.0093269	0.00432161	-0.00359957	-0.0187407
1.009	0.0128457	0.0129296	0.0121356	-0.00622212	0.00192676	0.00519697	0.00208312	0.0127766	0.00919186	0.00584157	-0.00360217	-0.0189491
1.01	0.0133065	0.0128977	0.011486	-0.00567359	0.00167916	0.00376254	0.00313793	0.0122201	0.00881707	0.00817548	-0.00342915	-0.0183835
1.011	0.0135505	0.0130971	0.0108487	-0.00455221	0.00134608	0.00279682	0.00440267	0.0114608	0.00813509	0.0116864	-0.00340178	-0.0172331
1.012	0.0136755	0.0134326	0.0103625	-0.00296477	0.00107732	0.00223455	0.00585743	0.0103639	0.00723	0.0165194	-0.00366089	-0.01566
1.013	0.0136102	0.0138752	0.0101217	-0.00103818	0.00107198	0.00201442	0.00707042	0.00898761	0.00613114	0.0222215	-0.00404483	-0.0136922
1.014	0.0132772	0.0143592	0.0101086	0.000929351	0.00173661	0.0021071	0.00760592	0.00756916	0.00484666	0.027981	-0.0044603	-0.011381
1.015	0.0128233	0.0147624	0.0101649	0.00252126	0.0035584	0.00248222	0.0075473	0.00622163	0.00349476	0.0332765	-0.0050653	-0.00897145
1.016	0.0124937	0.0149958	0.0100815	0.00340038	0.00680882	0.00316913	0.00734896	0.00480903	0.00235229	0.0378885	-0.00596343	-0.00681828
1.017	0.0123985	0.0150255	0.00976053	0.00348149	0.0112979	0.00426213	0.0072798	0.00323039	0.00170143	0.0413641	-0.00697591	-0.00516247
1.018	0.0125265	0.0148088	0.0092889	0.00292093	0.0163729	0.00564638	0.00735263	0.0016534	0.00162639	0.0429701	-0.00783213	-0.00415898
1.019	0.0128312	0.0143241	0.00880329	0.00206751	0.0212869	0.00693467	0.00755345	0.000436252	0.00207762	0.0423133	-0.00836347	-0.00395481
1.02	0.0132053	0.0137146	0.00837478	0.00134333	0.0254356	0.00771572	0.00797102	-0.000169531	0.00306182	0.0397004	-0.00851539	-0.00450673
1.021	0.0134887	0.0132237	0.0080545	0.00103509	0.0283495	0.00782838	0.00875032	-0.000264633	0.00455804	0.0356484	-0.00829907	-0.00552931
1.022	0.0135872	0.012984	0.0078551	0.00126121	0.0297559	0.00750697	0.00986102	-0.000124328	0.00633328	0.0303696	-0.00776039	-0.00672448
1.023	0.0134991	0.0129638	0.00772365	0.00210711	0.0296099	0.00708982	0.0110615	0.00018439	0.00802603	0.0240541	-0.00705721	-0.00796387
1.024	0.013188	0.0130469	0.00767018	0.00360368	0.0280489	0.00660969	0.0120577	0.000791702	0.00940474	0.0173036	-0.00634892	-0.00921834
1.025	0.0126015	0.0131446	0.00776829	0.00560804	0.0253467	0.00591533	0.0126866	0.001731	0.0104932	0.0109116	-0.0055787	-0.0103526
1.026	0.0118143	0.0132129	0.00799752	0.00788495	0.021888	0.00504508	0.0131252	0.00285754	0.0114213	0.00540042	-0.00459111	-0.0110743
1.027	0.0110296	0.0132676	0.00830551	0.0102714	0.0181553	0.00423308	0.0137269	0.00392478	0.0122287	0.000850097	-0.00331137	-0.0110265
[truncated: 1,972 more rows]

## Sheet: WT_K_S2_N1
	300	100	30	10	3	1	0.3	0.1	0.03	0.01	0.003	0
[truncated: 3,000 more rows]

## Sheet: WT_K_S2_N2
	300	100	30	10	3	1	0.3	0.1	0.03	0.01	0.003	0
[truncated: 3,000 more rows]

[truncated: 11 more sheets: WT_Rb_S1_N1, WT_Rb_S1_N2, WT_Rb_S2_N1, WT_Rb_S2_N2, WT_NH4_S1_N1, WT_NH4_S1_N2, WT_NH4_S2_N1, WT_NH4_S2_N2, WT_Na_S1_N1, WT_Na_S1_N2, Sheet6]
