# Supplementary material for: Conduction pathway for potassium through the Escherichia coli pump KdpFABC
Source: eLife. 2025 Nov 19;14:RP107397. doi: 10.7554/eLife.107397 (PMC12629597; doi:10.7554/eLife.107397)
Supplement: Figure 2—figure supplement 3—source data 1. — Each tab in the file contains data for one panel with the ion concentration indicated in the first row in mM and the time listed in the first column in seconds. [file elife-107397-fig2-figsupp3-data1.xlsx]

## Sheet: Q116R_K_S1_N1
	300	100	30	10	3	1	0.3	0.1	0.03	0	0
0	-0.000114443	-0.000431971	-0.000708885	-0.000520583	-0.000398741	-0.000225209	-0.000103367	-3.68e-06	2.59e-05	-3.68e-06	1.11e-05
0.001	-0.000762703	-0.00279773	-0.00452958	-0.00329979	-0.00252685	-0.00146873	-0.000610872	2.4e-06	7.99e-05	3.19e-05	7.07e-05
0.002	-0.00246488	-0.00901337	-0.0143777	-0.0104146	-0.00791008	-0.00469532	-0.0018341	-2.03e-05	6.24e-05	0.00021594	0.000246223
0.003	-0.00535676	-0.0199781	-0.03148	-0.0227673	-0.0169813	-0.0101906	-0.00388784	-0.000228281	-0.000143571	0.000607961	0.000601867
0.004	-0.00920936	-0.0352316	-0.055137	-0.0399118	-0.0290935	-0.017511	-0.00667358	-0.000671181	-0.000617962	0.00118045	0.00115033
0.005	-0.0137189	-0.0534938	-0.0835816	-0.0604973	-0.0432486	-0.0260008	-0.00995721	-0.00123756	-0.00132294	0.00187746	0.0018892
0.006	-0.0184605	-0.073229	-0.114624	-0.0827716	-0.0584781	-0.0349901	-0.0134968	-0.00187894	-0.00200264	0.00265473	0.00284824
0.007	-0.0229341	-0.0930154	-0.146088	-0.105169	-0.0739314	-0.0438245	-0.0171023	-0.00258149	-0.00239043	0.00349679	0.00406521
0.008	-0.0268131	-0.111679	-0.175937	-0.126432	-0.0888004	-0.052042	-0.0206282	-0.00329112	-0.00238216	0.00436717	0.00547509
0.009	-0.0299733	-0.128325	-0.202433	-0.145435	-0.102242	-0.0594039	-0.023904	-0.00395062	-0.00197233	0.00513383	0.00681103
0.01	-0.0324496	-0.142373	-0.224487	-0.161365	-0.113543	-0.0657572	-0.0267449	-0.00448404	-0.001229	0.00551229	0.00785097
0.011	-0.0344469	-0.153634	-0.241735	-0.173972	-0.12236	-0.0710316	-0.029134	-0.00484457	-0.00026536	0.00516211	0.00862917
0.012	-0.036203	-0.162255	-0.254281	-0.183387	-0.12865	-0.0752827	-0.0312081	-0.00505913	0.000828485	0.00399373	0.00909247
0.013	-0.0378106	-0.16844	-0.262528	-0.189824	-0.132519	-0.0785796	-0.0330565	-0.00519739	0.00191368	0.00226302	0.00901907
0.014	-0.0392426	-0.172325	-0.267067	-0.193569	-0.134249	-0.0808968	-0.0346036	-0.0053847	0.00275205	0.000258977	0.00843885
0.015	-0.0404197	-0.174175	-0.2685	-0.195013	-0.134271	-0.082251	-0.0356071	-0.00572851	0.00310147	-0.00183302	0.00752701
0.016	-0.0412033	-0.174468	-0.267382	-0.194648	-0.133116	-0.0828381	-0.0358662	-0.00614247	0.002806	-0.0037949	0.00631708
0.017	-0.0415398	-0.173691	-0.264359	-0.193047	-0.131349	-0.0829556	-0.0354792	-0.00637695	0.00190967	-0.00539777	0.00489513
0.018	-0.0416083	-0.172119	-0.260239	-0.190716	-0.129359	-0.0828408	-0.034805	-0.00629576	0.000663226	-0.00647567	0.00346451
0.019	-0.0416641	-0.169985	-0.255845	-0.188037	-0.127381	-0.0825689	-0.0341773	-0.00601484	-0.000561372	-0.00695654	0.00218621
0.02	-0.0418435	-0.167705	-0.251789	-0.185333	-0.125694	-0.0819158	-0.0337674	-0.00571056	-0.00135246	-0.00690092	0.00118822
0.021	-0.0421575	-0.165676	-0.248359	-0.182881	-0.124469	-0.0804707	-0.033617	-0.00537988	-0.00146834	-0.00648844	0.000616306
0.022	-0.0424906	-0.164045	-0.245603	-0.180924	-0.123602	-0.0783804	-0.0336096	-0.00484042	-0.000949948	-0.00596099	0.000562929
0.023	-0.0426566	-0.162827	-0.243504	-0.179543	-0.122889	-0.0763902	-0.0335387	-0.0038918	4.28e-05	-0.00557466	0.000997548
0.024	-0.0425676	-0.162113	-0.242105	-0.178596	-0.122245	-0.0749182	-0.0332972	-0.00251193	0.00141168	-0.00556273	0.00177637
0.025	-0.0423169	-0.162047	-0.241445	-0.177933	-0.121737	-0.0739112	-0.0329417	-0.000956404	0.0029814	-0.0060619	0.00265504
0.026	-0.0421217	-0.162635	-0.24142	-0.177512	-0.121397	-0.0734897	-0.0325922	0.000460891	0.00431462	-0.00702013	0.00329249
0.027	-0.0421651	-0.16368	-0.241843	-0.177322	-0.12111	-0.0741583	-0.0322647	0.00156241	0.00496545	-0.00821856	0.00334408
0.028	-0.04243	-0.164908	-0.242519	-0.177304	-0.120795	-0.0763038	-0.0318134	0.00216362	0.00478093	-0.0094252	0.00261928
0.029	-0.0427124	-0.16608	-0.243239	-0.177394	-0.120487	-0.0797795	-0.0310919	0.0020131	0.00389624	-0.010458	0.00114923
0.03	-0.0427954	-0.167003	-0.243817	-0.17762	-0.120256	-0.0840445	-0.0301051	0.00104865	0.00260526	-0.01119	-0.000866927
0.031	-0.0425625	-0.16751	-0.244174	-0.178124	-0.120118	-0.0884361	-0.0289917	-0.000449834	0.00113799	-0.0115994	-0.0031069
0.032	-0.0419851	-0.167488	-0.244361	-0.179035	-0.120013	-0.0923274	-0.0279274	-0.00207162	-0.000439869	-0.0117936	-0.00511404
0.033	-0.0410412	-0.166945	-0.244533	-0.180336	-0.119949	-0.0952847	-0.027046	-0.00346642	-0.00205295	-0.0119021	-0.00644558
0.034	-0.0397314	-0.166041	-0.244828	-0.181868	-0.120077	-0.0971567	-0.0263997	-0.0043501	-0.00353408	-0.0118441	-0.00692617
0.035	-0.0382242	-0.165016	-0.245216	-0.183448	-0.120566	-0.0979436	-0.0259589	-0.00456821	-0.00471868	-0.0114307	-0.00663988
0.036	-0.0368113	-0.163998	-0.245579	-0.184948	-0.121447	-0.0976444	-0.0257421	-0.00413799	-0.00544678	-0.0106446	-0.0057304
0.037	-0.0356826	-0.162862	-0.245888	-0.186239	-0.122556	-0.0963785	-0.025889	-0.00314752	-0.00559297	-0.00955245	-0.00429804
0.038	-0.0348384	-0.16146	-0.246162	-0.187165	-0.123626	-0.0944727	-0.0264843	-0.00173846	-0.00513976	-0.00823418	-0.00247031
0.039	-0.0342343	-0.15995	-0.246311	-0.187589	-0.124471	-0.0922015	-0.0274213	-0.000178651	-0.00416173	-0.00687825	-0.000551056
0.04	-0.0338909	-0.158681	-0.246231	-0.187431	-0.125073	-0.0896913	-0.0284794	0.00123321	-0.00283262	-0.00573592	0.00108986
0.041	-0.0337812	-0.157868	-0.24596	-0.186741	-0.125525	-0.0870923	-0.0294709	0.00224418	-0.00130084	-0.0050715	0.00225511
0.042	-0.0337509	-0.157487	-0.245605	-0.185758	-0.125891	-0.0845676	-0.0303151	0.00267274	0.000369325	-0.00512059	0.00283987
0.043	-0.0336747	-0.157302	-0.245225	-0.184769	-0.126094	-0.0821788	-0.0309915	0.00257948	0.00203462	-0.00595553	0.00281984
0.044	-0.0336932	-0.157074	-0.244798	-0.183937	-0.126031	-0.0799182	-0.0314961	0.00215038	0.00347378	-0.00748217	0.00239698
0.045	-0.0340492	-0.156785	-0.244292	-0.183328	-0.125726	-0.0778573	-0.0318568	0.00148053	0.00447021	-0.00953651	0.00175026
0.046	-0.0347034	-0.156579	-0.243842	-0.18294	-0.125255	-0.0761623	-0.0320476	0.000749738	0.00488985	-0.0118572	0.000831747
0.047	-0.035395	-0.156568	-0.243721	-0.182719	-0.124671	-0.074941	-0.031922	0.000248676	0.00474415	-0.0140381	-0.000407341
0.048	-0.0359347	-0.156799	-0.24407	-0.182574	-0.124025	-0.0742374	-0.0313219	0.000212342	0.00408925	-0.0156655	-0.00194687
0.049	-0.0362665	-0.157288	-0.244756	-0.182395	-0.12339	-0.074147	-0.0302448	0.000788892	0.00295394	-0.0165338	-0.00365563
0.05	-0.0363553	-0.157941	-0.245507	-0.182118	-0.122945	-0.074736	-0.0289226	0.00185779	0.0013929	-0.0166269	-0.00514292
0.051	-0.0361908	-0.158586	-0.246088	-0.181837	-0.122862	-0.0758275	-0.0277123	0.00297578	-0.00045271	-0.0159611	-0.00605592
0.052	-0.0358683	-0.159145	-0.246364	-0.181815	-0.123038	-0.0770531	-0.0269202	0.00373045	-0.00238234	-0.0145963	-0.00635547
0.053	-0.0355079	-0.159606	-0.246346	-0.182203	-0.123198	-0.0781484	-0.0266675	0.00395972	-0.00418891	-0.0127123	-0.00610015
0.054	-0.0351168	-0.159934	-0.246212	-0.182901	-0.123144	-0.0790312	-0.0268854	0.00369084	-0.00559664	-0.0105556	-0.00530216
0.055	-0.0346383	-0.159994	-0.246141	-0.183675	-0.122812	-0.0796513	-0.027443	0.00301538	-0.00635067	-0.00836972	-0.00396734
0.056	-0.0341202	-0.159628	-0.246217	-0.184291	-0.122132	-0.0799511	-0.0282452	0.00203408	-0.00636021	-0.0063722	-0.00213196
0.057	-0.0337423	-0.158934	-0.246482	-0.184694	-0.121068	-0.0799735	-0.029271	0.000846041	-0.00553677	-0.00471445	6.73e-05
0.058	-0.0336562	-0.158256	-0.246927	-0.184986	-0.119849	-0.0798221	-0.0305032	-0.000518114	-0.00382803	-0.00349182	0.00235053
0.059	-0.0338133	-0.157922	-0.247461	-0.185228	-0.118794	-0.079472	-0.0317842	-0.00206058	-0.00153125	-0.00272474	0.00435324
0.06	-0.0340623	-0.158116	-0.247952	-0.18543	-0.118051	-0.0788675	-0.0328533	-0.00374856	0.000771208	-0.00233615	0.00583591
0.061	-0.0343344	-0.15876	-0.248328	-0.185591	-0.117638	-0.0781489	-0.0335868	-0.00552432	0.00258241	-0.00225413	0.00676959
0.062	-0.0345834	-0.159565	-0.248608	-0.185723	-0.11745	-0.0775338	-0.0340468	-0.00731891	0.00372493	-0.00240466	0.00713955
0.063	-0.03476	-0.160303	-0.248755	-0.185927	-0.117376	-0.0771603	-0.0343073	-0.00913271	0.00431573	-0.00263601	0.00682813
0.064	-0.034814	-0.160928	-0.248641	-0.18635	-0.117468	-0.0770818	-0.0342992	-0.0110321	0.00452568	-0.00279948	0.00578318
0.065	-0.0346639	-0.161433	-0.248228	-0.186961	-0.117818	-0.0772517	-0.0337933	-0.0129265	0.00442572	-0.00283239	0.00421452
0.066	-0.03436	-0.161722	-0.247628	-0.187619	-0.11842	-0.0775748	-0.032669	-0.0145364	0.00403492	-0.00279207	0.00245151
0.067	-0.034112	-0.161755	-0.247053	-0.188309	-0.119196	-0.0779905	-0.0311301	-0.0156217	0.00336738	-0.00281214	0.000699548
0.068	-0.0340408	-0.161671	-0.246704	-0.189071	-0.120064	-0.0785479	-0.0295431	-0.0160743	0.00249446	-0.00295508	-0.000933554
0.069	-0.0341441	-0.16163	-0.246584	-0.189887	-0.121041	-0.0793335	-0.0281865	-0.0159004	0.00152421	-0.00313458	-0.00240552
0.07	-0.0343616	-0.161732	-0.246523	-0.190682	-0.122218	-0.0802852	-0.0272129	-0.0151956	0.000494355	-0.00315163	-0.00376636
0.071	-0.0345006	-0.162024	-0.246361	-0.191306	-0.123584	-0.0812221	-0.0267001	-0.0141022	-0.000495132	-0.00284799	-0.00504088
0.072	-0.0344435	-0.162457	-0.246056	-0.191561	-0.12491	-0.0820061	-0.0266246	-0.01277	-0.00118156	-0.00229312	-0.00619484
0.073	-0.0343994	-0.162927	-0.245674	-0.191283	-0.12588	-0.0825957	-0.0269351	-0.0113493	-0.00137624	-0.00177747	-0.00725119
0.074	-0.0346412	-0.163335	-0.245293	-0.190418	-0.126325	-0.0829961	-0.0276116	-0.0100201	-0.0011144	-0.00166162	-0.00828097
0.075	-0.0352368	-0.163627	-0.244944	-0.189122	-0.126263	-0.0831746	-0.0285156	-0.00893749	-0.000515623	-0.00219332	-0.0092869
0.076	-0.0361644	-0.163801	-0.244629	-0.187692	-0.125847	-0.0830842	-0.0293962	-0.00818676	0.000371014	-0.00339366	-0.0102024
0.077	-0.0373536	-0.163904	-0.244332	-0.186402	-0.125299	-0.0828231	-0.0300955	-0.00776389	0.00143419	-0.00514855	-0.0110123
0.078	-0.0386007	-0.163985	-0.244059	-0.185462	-0.124765	-0.0825872	-0.0305669	-0.00755111	0.00228562	-0.00731876	-0.011852
0.079	-0.0396573	-0.163962	-0.243869	-0.185014	-0.124324	-0.082479	-0.0308278	-0.00747345	0.00251337	-0.00975713	-0.0129545
0.08	-0.0403664	-0.163737	-0.243778	-0.185147	-0.124063	-0.0825679	-0.0309652	-0.00758536	0.00219857	-0.0122779	-0.014416
0.081	-0.0406565	-0.163319	-0.243662	-0.185812	-0.123976	-0.0828548	-0.0309647	-0.00790244	0.00181927	-0.0146537	-0.0160615
0.082	-0.0404693	-0.16275	-0.243424	-0.18669	-0.123904	-0.0831222	-0.0306456	-0.00828353	0.00145533	-0.016713	-0.0175908
0.083	-0.0398311	-0.162136	-0.243139	-0.187391	-0.12369	-0.0832104	-0.0299249	-0.00851421	0.000553772	-0.0183266	-0.018758
0.084	-0.0389461	-0.161591	-0.242963	-0.187782	-0.123345	-0.0832113	-0.0289514	-0.00847317	-0.001389	-0.0192892	-0.0193876
0.085	-0.0380949	-0.16108	-0.242997	-0.187993	-0.122982	-0.0832115	-0.027964	-0.00817405	-0.00431157	-0.019406	-0.0193444
0.086	-0.0374715	-0.160554	-0.243255	-0.188139	-0.122591	-0.0831761	-0.0271591	-0.00765846	-0.00769341	-0.0187214	-0.0185926
0.087	-0.0371148	-0.160145	-0.243652	-0.188126	-0.122046	-0.0831178	-0.0266648	-0.00692319	-0.0109622	-0.0175344	-0.0172115
0.088	-0.0369773	-0.159999	-0.243968	-0.187819	-0.121362	-0.0832029	-0.0265888	-0.00594306	-0.0136679	-0.0162025	-0.0153306
0.089	-0.0370073	-0.159999	-0.243937	-0.187254	-0.120685	-0.0835762	-0.0269746	-0.00474194	-0.0154477	-0.014974	-0.0131334
0.09	-0.0371061	-0.159915	-0.243493	-0.186606	-0.120103	-0.0841675	-0.0277224	-0.00346769	-0.0162142	-0.0139363	-0.0108702
0.091	-0.0371357	-0.159641	-0.242903	-0.186073	-0.119689	-0.0847191	-0.0287019	-0.00238978	-0.0161947	-0.0131305	-0.00882424
0.092	-0.0370867	-0.159198	-0.242459	-0.185744	-0.119508	-0.084913	-0.029823	-0.00184948	-0.0155983	-0.0126585	-0.00711997
0.093	-0.0371062	-0.158763	-0.242201	-0.185552	-0.119539	-0.0845646	-0.0309373	-0.00209767	-0.0144652	-0.012625	-0.00567683
0.094	-0.0373587	-0.158571	-0.24211	-0.185402	-0.119739	-0.0837675	-0.0318377	-0.00303764	-0.012801	-0.0129944	-0.00476401
0.095	-0.0379092	-0.158709	-0.242296	-0.185331	-0.120009	-0.082839	-0.0323922	-0.0043552	-0.0107188	-0.0135445	-0.00510213
0.096	-0.0386657	-0.159116	-0.242846	-0.185408	-0.120257	-0.0820793	-0.0326235	-0.00593466	-0.00848695	-0.0140388	-0.00714918
0.097	-0.0394821	-0.159632	-0.24366	-0.185556	-0.12055	-0.0815729	-0.0326595	-0.00790098	-0.00635322	-0.0143658	-0.0107492
0.098	-0.0402499	-0.160003	-0.24457	-0.185543	-0.120964	-0.0812427	-0.0326232	-0.0103005	-0.00437867	-0.0144445	-0.0153012
0.099	-0.0408191	-0.160066	-0.245428	-0.185099	-0.121407	-0.0810462	-0.0325315	-0.0128628	-0.00257581	-0.0141192	-0.0201039
0.1	-0.0410162	-0.159848	-0.246086	-0.184086	-0.121807	-0.0810583	-0.0322887	-0.0151228	-0.000969949	-0.0132548	-0.0245429
0.101	-0.0408352	-0.159453	-0.2465	-0.182632	-0.12229	-0.081342	-0.03177	-0.0167475	0.000477543	-0.0118682	-0.0280861
0.102	-0.0404499	-0.159033	-0.246695	-0.181096	-0.122899	-0.0818508	-0.030914	-0.0176483	0.00173438	-0.0101561	-0.0304262
0.103	-0.0400076	-0.158725	-0.246621	-0.179789	-0.123358	-0.0824328	-0.029842	-0.017958	0.00267658	-0.00841364	-0.0314523
0.104	-0.0395457	-0.158563	-0.24623	-0.178784	-0.123318	-0.0829211	-0.0289013	-0.0179714	0.00324764	-0.00680549	-0.0311072
0.105	-0.0390641	-0.15853	-0.245601	-0.177991	-0.122673	-0.0832614	-0.0284434	-0.0178368	0.00348014	-0.00533137	-0.0295534
0.106	-0.0386024	-0.158617	-0.244777	-0.177337	-0.121629	-0.0833927	-0.028586	-0.0174088	0.00347598	-0.00412168	-0.0271243
0.107	-0.0382194	-0.158793	-0.243723	-0.176843	-0.120496	-0.0832263	-0.0292447	-0.0165636	0.00333612	-0.00346715	-0.024046
0.108	-0.0379075	-0.158954	-0.242577	-0.176469	-0.119425	-0.0828698	-0.0302234	-0.0154145	0.00309153	-0.00345171	-0.0206457
0.109	-0.0376162	-0.159012	-0.241613	-0.176043	-0.118417	-0.0825398	-0.0312373	-0.0141706	0.0028043	-0.00387917	-0.0175707
0.11	-0.0373041	-0.158971	-0.241025	-0.175471	-0.11741	-0.0823263	-0.0319665	-0.0129737	0.00263435	-0.0046383	-0.0154657
0.111	-0.0369074	-0.158874	-0.240922	-0.174909	-0.116338	-0.0821701	-0.0322031	-0.0118838	0.00265858	-0.00580329	-0.0146918
0.112	-0.0363722	-0.158803	-0.241308	-0.17459	-0.11529	-0.0819917	-0.0319859	-0.0110174	0.00272503	-0.00737251	-0.0152573
0.113	-0.0357527	-0.15888	-0.242057	-0.17456	-0.114465	-0.0818775	-0.0315349	-0.0106888	0.00256839	-0.00913607	-0.0167848
0.114	-0.0351735	-0.159155	-0.242986	-0.174786	-0.113982	-0.0820077	-0.0310606	-0.011229	0.0020258	-0.0107601	-0.0187828
0.115	-0.03472	-0.159626	-0.243952	-0.175327	-0.113946	-0.0823724	-0.0306376	-0.0126182	0.00114539	-0.0119338	-0.0209465
0.116	-0.0344349	-0.160302	-0.244938	-0.176165	-0.114449	-0.0828262	-0.0302899	-0.0144297	4.08e-05	-0.0125251	-0.0230485
0.117	-0.0343396	-0.161112	-0.245951	-0.177128	-0.115428	-0.0833286	-0.0301354	-0.0161455	-0.00118997	-0.0125987	-0.0248538
0.118	-0.0344369	-0.161882	-0.246867	-0.178064	-0.116746	-0.0839393	-0.0302364	-0.017415	-0.0024162	-0.0122499	-0.0262538
0.119	-0.0347407	-0.162431	-0.247529	-0.178932	-0.118273	-0.084691	-0.0304342	-0.0180789	-0.00357733	-0.0115905	-0.0272165
0.12	-0.0352677	-0.162664	-0.247788	-0.179715	-0.119828	-0.0855054	-0.0305161	-0.0181332	-0.00461933	-0.0108334	-0.0276435
0.121	-0.0359921	-0.162566	-0.247476	-0.180278	-0.121212	-0.0861993	-0.030412	-0.0176311	-0.00535026	-0.010233	-0.0274487
0.122	-0.0368454	-0.162139	-0.246636	-0.180387	-0.122303	-0.0865756	-0.0302082	-0.0166172	-0.00563023	-0.00995111	-0.0266488
0.123	-0.0377395	-0.161424	-0.245544	-0.179914	-0.123029	-0.0865818	-0.0297103	-0.0151709	-0.00557571	-0.00991528	-0.0253121
0.124	-0.0385272	-0.160528	-0.244484	-0.179008	-0.123327	-0.0863323	-0.0282199	-0.0134004	-0.00539839	-0.00992183	-0.0236596
0.125	-0.0389899	-0.15956	-0.243613	-0.177923	-0.123193	-0.0859575	-0.0256187	-0.0114627	-0.00514667	-0.00988973	-0.0221113
0.126	-0.0389186	-0.158658	-0.242878	-0.176825	-0.122638	-0.0855747	-0.0229805	-0.00955698	-0.0047883	-0.00988151	-0.0209716
0.127	-0.0382649	-0.158026	-0.242181	-0.175867	-0.121671	-0.0852893	-0.0214782	-0.00783634	-0.00436945	-0.00999756	-0.0203035
0.128	-0.0372847	-0.157792	-0.241537	-0.175173	-0.120442	-0.0851216	-0.0215142	-0.00647845	-0.00395836	-0.0103346	-0.0201001
0.129	-0.0363732	-0.157912	-0.240982	-0.17471	-0.119245	-0.0850038	-0.0228987	-0.00574136	-0.0036737	-0.0109509	-0.0202997
0.13	-0.0357634	-0.158249	-0.240567	-0.174391	-0.118281	-0.0848626	-0.0252541	-0.00571053	-0.00371583	-0.011818	-0.0207623
0.131	-0.0355418	-0.158661	-0.240338	-0.17429	-0.117578	-0.0847392	-0.0281755	-0.00611913	-0.0042165	-0.0128521	-0.0213344
0.132	-0.0357219	-0.159057	-0.240302	-0.174558	-0.117156	-0.0848076	-0.0311447	-0.00657185	-0.00516131	-0.0139734	-0.0218432
0.133	-0.036153	-0.159416	-0.240476	-0.175191	-0.117147	-0.085225	-0.0336003	-0.00687515	-0.0063759	-0.0150755	-0.0220386
0.134	-0.036567	-0.159737	-0.240878	-0.176047	-0.117602	-0.0860185	-0.0352521	-0.0071533	-0.00755899	-0.0160201	-0.0217255
0.135	-0.0368398	-0.159994	-0.241511	-0.177016	-0.118286	-0.0870447	-0.0362078	-0.00764292	-0.00849754	-0.0167142	-0.0210199
0.136	-0.0370289	-0.160187	-0.242342	-0.178044	-0.118871	-0.0880207	-0.0367957	-0.00841525	-0.0091817	-0.0170818	-0.0202484
0.137	-0.0371274	-0.160356	-0.243251	-0.178984	-0.119226	-0.088725	-0.0372006	-0.00934143	-0.00968375	-0.0169482	-0.0196265
0.138	-0.0370567	-0.160539	-0.244115	-0.17958	-0.119383	-0.0891225	-0.0373368	-0.0101852	-0.0100624	-0.0161396	-0.0192038
0.139	-0.0368622	-0.160736	-0.244867	-0.179673	-0.119455	-0.0892232	-0.0371474	-0.0106646	-0.0103273	-0.0146807	-0.0189271
0.14	-0.0366668	-0.16091	-0.245445	-0.179338	-0.119508	-0.0889554	-0.0367316	-0.0104646	-0.0103819	-0.0128057	-0.0186993
0.141	-0.0365478	-0.161046	-0.245759	-0.178783	-0.119427	-0.0882374	-0.0361528	-0.0092701	-0.0100654	-0.0108682	-0.0185413
0.142	-0.036539	-0.161227	-0.245719	-0.178182	-0.119084	-0.0870513	-0.0353842	-0.00691648	-0.00932728	-0.00923508	-0.0185656
0.143	-0.0366067	-0.161505	-0.245278	-0.177661	-0.118474	-0.0854373	-0.0344439	-0.00356013	-0.0083145	-0.00820917	-0.0187588
0.144	-0.0367136	-0.161786	-0.244531	-0.177334	-0.117601	-0.0834976	-0.033401	0.000343976	-0.00721365	-0.00790464	-0.0190055
0.145	-0.0368618	-0.161931	-0.243686	-0.177304	-0.116497	-0.0814267	-0.0322863	0.00421586	-0.00604326	-0.00815913	-0.0192754
0.146	-0.0369621	-0.161837	-0.242876	-0.177645	-0.115373	-0.0795306	-0.0311109	0.00745845	-0.00472787	-0.00873484	-0.0195691
0.147	-0.036938	-0.161482	-0.242175	-0.178372	-0.114513	-0.0781365	-0.0299051	0.009568	-0.00332168	-0.00949291	-0.0197402
0.148	-0.0368916	-0.16093	-0.241612	-0.179349	-0.114027	-0.0774386	-0.0286654	0.0102991	-0.00198329	-0.0103062	-0.0195903
0.149	-0.0369108	-0.160216	-0.24116	-0.180253	-0.113906	-0.0774513	-0.0273531	0.00965672	-0.000870666	-0.0110365	-0.0190609
0.15	-0.0370037	-0.159367	-0.240923	-0.18076	-0.114236	-0.0780494	-0.0260284	0.00776241	-0.00020722	-0.0116267	-0.0181876
0.151	-0.0372288	-0.158462	-0.241039	-0.180784	-0.115061	-0.0789997	-0.0248149	0.00492669	-0.000181118	-0.0120736	-0.0169751
0.152	-0.0376091	-0.157553	-0.241447	-0.18045	-0.116216	-0.0800457	-0.0237728	0.00165144	-0.000766558	-0.012333	-0.0154292
0.153	-0.0380569	-0.156655	-0.241932	-0.179879	-0.117502	-0.081036	-0.0229909	-0.00167959	-0.00184642	-0.012334	-0.0136933
0.154	-0.0384801	-0.155856	-0.242289	-0.179152	-0.118745	-0.0819005	-0.0226027	-0.00481438	-0.00328886	-0.0120811	-0.0120014
0.155	-0.0388308	-0.155277	-0.242434	-0.178444	-0.119768	-0.0825212	-0.0226721	-0.00745816	-0.0048971	-0.0116686	-0.0105559
0.156	-0.0390444	-0.155007	-0.242354	-0.177869	-0.120477	-0.0827726	-0.0231808	-0.00942203	-0.00646249	-0.0111628	-0.00957179
0.157	-0.0391333	-0.155111	-0.242062	-0.177379	-0.120799	-0.0826797	-0.0240114	-0.0106959	-0.00778813	-0.0105718	-0.00926438
0.158	-0.0392554	-0.155483	-0.241666	-0.17696	-0.120593	-0.082386	-0.0250126	-0.0113564	-0.00870805	-0.00995807	-0.00973798
0.159	-0.0394839	-0.155832	-0.241295	-0.176657	-0.119767	-0.0819311	-0.0261244	-0.0115744	-0.00915255	-0.00948311	-0.0108986
0.16	-0.0397161	-0.155961	-0.241036	-0.176496	-0.118416	-0.081269	-0.0272704	-0.011595	-0.00917153	-0.00932847	-0.0124845
0.161	-0.039862	-0.155895	-0.240956	-0.176452	-0.116831	-0.080555	-0.0282939	-0.0116082	-0.00887063	-0.00953638	-0.0143249
0.162	-0.0398819	-0.155738	-0.241053	-0.176396	-0.115338	-0.0801315	-0.0290894	-0.0116527	-0.00840046	-0.00996117	-0.0164109
0.163	-0.0397159	-0.155623	-0.241242	-0.176227	-0.114097	-0.080181	-0.0296539	-0.0117442	-0.00800408	-0.0104826	-0.0186747
0.164	-0.0393389	-0.155719	-0.241462	-0.17608	-0.113214	-0.0806212	-0.0300073	-0.0118971	-0.00787285	-0.0110853	-0.0209557
0.165	-0.0387746	-0.156055	-0.241754	-0.176159	-0.112808	-0.0812679	-0.0301141	-0.0119817	-0.00803896	-0.0116883	-0.0230432
0.166	-0.0380851	-0.156474	-0.242179	-0.17646	-0.112881	-0.081984	-0.0299346	-0.0118811	-0.00858267	-0.0121605	-0.0246993
0.167	-0.0374434	-0.156848	-0.242686	-0.176802	-0.113371	-0.0827406	-0.0294865	-0.0116266	-0.00973057	-0.0124391	-0.0257693
0.168	-0.0370053	-0.15714	-0.243234	-0.17703	-0.114233	-0.0835143	-0.028874	-0.011317	-0.011569	-0.0124694	-0.0262175
0.169	-0.0367036	-0.157288	-0.243836	-0.177211	-0.115428	-0.08418	-0.0283476	-0.0110786	-0.0138347	-0.0121925	-0.0260948
0.17	-0.0363508	-0.157188	-0.244336	-0.177481	-0.116834	-0.0845889	-0.0281446	-0.0109744	-0.0160965	-0.0116432	-0.0254268
0.171	-0.0357956	-0.156733	-0.244522	-0.177755	-0.118176	-0.0846872	-0.0282784	-0.010941	-0.0180693	-0.010945	-0.0241611
0.172	-0.0349683	-0.155851	-0.244383	-0.177821	-0.119117	-0.0845153	-0.0287337	-0.0108291	-0.0196724	-0.0101813	-0.022424
0.173	-0.0339172	-0.1546	-0.244011	-0.177583	-0.119486	-0.0841608	-0.0295959	-0.0105573	-0.0208605	-0.00932336	-0.0206116
0.174	-0.0327446	-0.153239	-0.243383	-0.177064	-0.119369	-0.0836813	-0.0307805	-0.010295	-0.02152	-0.00835898	-0.0190757
0.175	-0.0315485	-0.152139	-0.242488	-0.176236	-0.119016	-0.0830392	-0.0320015	-0.0103364	-0.0214725	-0.00741064	-0.0180348
0.176	-0.030497	-0.15161	-0.241461	-0.175135	-0.118626	-0.0821848	-0.0330109	-0.010811	-0.0205649	-0.00667779	-0.017633
0.177	-0.0297618	-0.151757	-0.240442	-0.173924	-0.118259	-0.0811181	-0.0336892	-0.0116001	-0.0187858	-0.00636159	-0.0178366
0.178	-0.0292832	-0.152441	-0.239499	-0.172639	-0.117907	-0.0799182	-0.0340092	-0.012506	-0.0163214	-0.0065793	-0.0185231
0.179	-0.0288213	-0.153453	-0.238701	-0.171148	-0.117539	-0.0787578	-0.033986	-0.0134643	-0.0135309	-0.00731631	-0.0196386
0.18	-0.0282275	-0.154652	-0.238106	-0.169302	-0.117092	-0.0777395	-0.0337191	-0.0145518	-0.0108287	-0.00850359	-0.0211333
0.181	-0.0275612	-0.155918	-0.237688	-0.167021	-0.116523	-0.076841	-0.0333628	-0.0157814	-0.00850418	-0.0100421	-0.0228546
0.182	-0.0270492	-0.157107	-0.237425	-0.164262	-0.115856	-0.0760329	-0.0330051	-0.0169869	-0.00671094	-0.0117627	-0.0245104
0.183	-0.0268511	-0.158012	-0.237402	-0.160888	-0.115165	-0.0753726	-0.0326015	-0.0179702	-0.00560388	-0.0134448	-0.0257643
0.184	-0.0268961	-0.158469	-0.237703	-0.156817	-0.114531	-0.0750043	-0.0319851	-0.0186034	-0.00527618	-0.0148815	-0.0265179
0.185	-0.027083	-0.158558	-0.23828	-0.152345	-0.114054	-0.0749591	-0.0310546	-0.0188548	-0.00559132	-0.0159702	-0.0270235
0.186	-0.0273495	-0.158538	-0.238965	-0.148057	-0.113826	-0.0751481	-0.0298941	-0.0188639	-0.00622766	-0.0167516	-0.0275367
0.187	-0.0275271	-0.158596	-0.239622	-0.144571	-0.113847	-0.0755473	-0.0287056	-0.0188038	-0.00693015	-0.0173814	-0.0280109
0.188	-0.0274753	-0.158776	-0.24023	-0.142646	-0.114057	-0.0761321	-0.0277501	-0.0186518	-0.00765973	-0.018026	-0.0282271
0.189	-0.0272249	-0.159038	-0.24078	-0.14312	-0.114453	-0.0768029	-0.0271902	-0.018216	-0.00845997	-0.0187311	-0.0279989
0.19	-0.0268437	-0.159265	-0.24124	-0.146121	-0.114999	-0.0774648	-0.0270242	-0.0173911	-0.00930013	-0.0194188	-0.0273071
0.191	-0.0264531	-0.159294	-0.241553	-0.150843	-0.115484	-0.0780383	-0.0272278	-0.016318	-0.0100245	-0.0199862	-0.0264157
0.192	-0.0263902	-0.159006	-0.241562	-0.156323	-0.115648	-0.0783911	-0.0277223	-0.015193	-0.0104199	-0.020389	-0.0256605
0.193	-0.0269504	-0.158379	-0.241112	-0.161908	-0.115427	-0.0784376	-0.0282972	-0.014061	-0.0104191	-0.020646	-0.0250677
0.194	-0.0280167	-0.157451	-0.240224	-0.16714	-0.114932	-0.0783053	-0.0287719	-0.0128996	-0.0101874	-0.020792	-0.0244846
0.195	-0.0292161	-0.156294	-0.239127	-0.171585	-0.114328	-0.0782221	-0.0290824	-0.0117792	-0.00991208	-0.0208643	-0.0240008
0.196	-0.0302527	-0.155079	-0.238088	-0.17492	-0.113793	-0.0783451	-0.0292169	-0.0109129	-0.00959428	-0.0209061	-0.0239351
0.197	-0.0310185	-0.154054	-0.237241	-0.177133	-0.11339	-0.0788124	-0.0292046	-0.010566	-0.00921075	-0.0210096	-0.0244538
0.198	-0.0315968	-0.1534	-0.236695	-0.17842	-0.113163	-0.0797582	-0.029081	-0.0108916	-0.00893303	-0.0213021	-0.0253777
0.199	-0.0321324	-0.153147	-0.236538	-0.178979	-0.113235	-0.081175	-0.0288349	-0.0118323	-0.00902919	-0.0217414	-0.026391
0.2	-0.0327362	-0.153217	-0.236699	-0.179013	-0.113578	-0.0829105	-0.0284125	-0.0131864	-0.00958923	-0.0221014	-0.0272387
0.201	-0.0335105	-0.153527	-0.237028	-0.178811	-0.11401	-0.0848858	-0.027826	-0.014789	-0.0103788	-0.0222312	-0.0277177
0.202	-0.0344762	-0.153977	-0.237423	-0.178611	-0.114429	-0.08725	-0.0272468	-0.0165482	-0.011054	-0.0221152	-0.0276992
0.203	-0.0355445	-0.154393	-0.237836	-0.178439	-0.114814	-0.0902189	-0.0268747	-0.0183161	-0.0114354	-0.0217552	-0.0270715
0.204	-0.0366186	-0.154667	-0.238228	-0.178242	-0.115096	-0.0937388	-0.0267744	-0.0198909	-0.0115469	-0.0211379	-0.0256357
0.205	-0.0376433	-0.154882	-0.238536	-0.177959	-0.115125	-0.0973332	-0.0268945	-0.0210512	-0.0115532	-0.0202279	-0.0233209
0.206	-0.0385353	-0.155138	-0.238708	-0.177461	-0.114807	-0.100279	-0.0271528	-0.0215826	-0.0116002	-0.0189744	-0.0204056
0.207	-0.0391551	-0.155414	-0.238713	-0.176641	-0.114244	-0.101977	-0.0275291	-0.0214029	-0.0116814	-0.0174406	-0.0173527
0.208	-0.0393956	-0.155667	-0.238543	-0.175585	-0.113615	-0.102195	-0.0281541	-0.0205869	-0.0117204	-0.0157815	-0.0146528
0.209	-0.0392267	-0.155838	-0.238175	-0.174526	-0.113037	-0.101008	-0.0292118	-0.0192643	-0.0117294	-0.0140831	-0.0127557
0.21	-0.0386731	-0.155848	-0.237618	-0.17364	-0.112635	-0.0986507	-0.0306803	-0.0175329	-0.011752	-0.0125283	-0.0118325
0.211	-0.0377757	-0.155665	-0.236995	-0.173009	-0.112512	-0.0954539	-0.0322593	-0.0155325	-0.0116981	-0.011471	-0.0117576
0.212	-0.0365792	-0.155273	-0.236446	-0.172656	-0.112729	-0.0918116	-0.0336154	-0.0135975	-0.0114686	-0.0110201	-0.0124362
0.213	-0.0351753	-0.154762	-0.236151	-0.172568	-0.113346	-0.0880592	-0.0345775	-0.0121744	-0.0111544	-0.0108632	-0.0138116
0.214	-0.0337066	-0.154351	-0.236307	-0.172799	-0.114263	-0.0844587	-0.0350961	-0.0115535	-0.0109442	-0.0107167	-0.015591
0.215	-0.0322327	-0.154098	-0.23682	-0.173454	-0.115199	-0.0812124	-0.035204	-0.0117546	-0.0109884	-0.0106275	-0.0173642
0.216	-0.0307463	-0.153884	-0.237342	-0.174481	-0.115977	-0.0784444	-0.0349751	-0.0126067	-0.0113945	-0.010663	-0.0189096
0.217	-0.0293535	-0.15368	-0.23769	-0.175664	-0.116612	-0.0763053	-0.0344957	-0.0138262	-0.0121652	-0.0106419	-0.0201374
0.218	-0.0281674	-0.153587	-0.237918	-0.1768	-0.117096	-0.0749178	-0.0338861	-0.015092	-0.013113	-0.0102876	-0.0209255
0.219	-0.0271777	-0.153645	-0.238128	-0.177705	-0.117297	-0.0741374	-0.0332606	-0.0161572	-0.01393	-0.00946547	-0.021165
0.22	-0.0263789	-0.153768	-0.238374	-0.178237	-0.117081	-0.0736798	-0.0326743	-0.0168854	-0.0143844	-0.0082487	-0.0207964
0.221	-0.0258276	-0.153837	-0.238697	-0.178441	-0.116505	-0.0734603	-0.0321319	-0.0170885	-0.0144946	-0.00674293	-0.019797
0.222	-0.0255884	-0.153812	-0.239174	-0.178442	-0.115809	-0.0734809	-0.0316791	-0.0164814	-0.014477	-0.004949	-0.0180343
0.223	-0.0257075	-0.153697	-0.239775	-0.178258	-0.115195	-0.0736061	-0.0314534	-0.0150357	-0.0144713	-0.00300684	-0.0151199
0.224	-0.0261544	-0.153438	-0.24037	-0.177873	-0.114726	-0.0736918	-0.0315431	-0.0131673	-0.0143365	-0.00130333	-0.010745
0.225	-0.0267884	-0.153038	-0.240927	-0.177349	-0.114379	-0.0736053	-0.031873	-0.011408	-0.0138003	-0.000169761	-0.0050548
0.226	-0.0274503	-0.152673	-0.241452	-0.176848	-0.114064	-0.0732128	-0.0322375	-0.0100891	-0.0128063	0.000220117	0.00144246
0.227	-0.0280916	-0.152532	-0.2418	-0.176517	-0.113649	-0.0725855	-0.0324109	-0.00935822	-0.011583	-0.000267847	0.00809137
0.228	-0.0287633	-0.152699	-0.241809	-0.176397	-0.113001	-0.072022	-0.0322762	-0.00925723	-0.0104587	-0.00165662	0.0142025
0.229	-0.0294541	-0.153219	-0.24148	-0.176539	-0.11206	-0.0718219	-0.0318491	-0.00975549	-0.00973179	-0.00363126	0.0191292
0.23	-0.0300325	-0.154065	-0.240921	-0.177006	-0.110917	-0.0721079	-0.0312058	-0.0108071	-0.00960913	-0.00562993	0.0223331
0.231	-0.0303821	-0.155047	-0.24029	-0.177714	-0.109771	-0.0728175	-0.0304122	-0.0123035	-0.010137	-0.00734838	0.0235784
0.232	-0.0304972	-0.155804	-0.239717	-0.178439	-0.108831	-0.0738073	-0.0295387	-0.0140479	-0.0111551	-0.00887745	0.0231447
0.233	-0.030433	-0.156024	-0.239228	-0.178982	-0.108319	-0.0749178	-0.0287199	-0.0159023	-0.012411	-0.0102998	0.0215759
0.234	-0.0302852	-0.155685	-0.23879	-0.179277	-0.108397	-0.0760149	-0.0281463	-0.0178759	-0.0137239	-0.01146	0.0192917
0.235	-0.0302192	-0.154916	-0.238376	-0.179372	-0.109053	-0.0770184	-0.0280028	-0.0199781	-0.0148968	-0.0120991	0.0165429
0.236	-0.030391	-0.153817	-0.23801	-0.179356	-0.110088	-0.0778454	-0.028407	-0.0220592	-0.0156467	-0.0120868	0.0134344
0.237	-0.030829	-0.152571	-0.237746	-0.17932	-0.111272	-0.0783826	-0.0293235	-0.0238502	-0.0158884	-0.0115931	0.0100021
0.238	-0.0314212	-0.151484	-0.237681	-0.1793	-0.112421	-0.0784965	-0.0305472	-0.0250727	-0.0158648	-0.0110767	0.0063773
0.239	-0.032018	-0.150877	-0.237945	-0.179231	-0.113337	-0.0780747	-0.0318807	-0.025564	-0.0158337	-0.0109405	0.00272143
0.24	-0.0325587	-0.150906	-0.238489	-0.179012	-0.1139	-0.0771539	-0.0333247	-0.0253874	-0.0158566	-0.0112217	-0.000986386
0.241	-0.0330723	-0.151462	-0.239046	-0.178645	-0.114135	-0.0758721	-0.0349713	-0.0248592	-0.0159249	-0.0117848	-0.00485996
0.242	-0.0335624	-0.152326	-0.239385	-0.178261	-0.11408	-0.0742922	-0.0367636	-0.0243955	-0.016093	-0.0125586	-0.00885509
0.243	-0.0339748	-0.153343	-0.239469	-0.177965	-0.113707	-0.0725173	-0.0384513	-0.0241791	-0.0163762	-0.0135067	-0.0127654
0.244	-0.0342887	-0.154385	-0.2393	-0.177696	-0.113059	-0.0708615	-0.0397544	-0.0240724	-0.0166607	-0.0146049	-0.0163612
0.245	-0.0345031	-0.155332	-0.238836	-0.177292	-0.112309	-0.0696658	-0.0405528	-0.023901	-0.0168942	-0.0157614	-0.019472
0.246	-0.0345775	-0.156139	-0.238145	-0.176667	-0.111607	-0.0690514	-0.04081	-0.023644	-0.0171571	-0.0167709	-0.0219485
0.247	-0.034541	-0.15675	-0.237457	-0.175867	-0.111034	-0.0689597	-0.0404815	-0.0233779	-0.0174787	-0.0175131	-0.0236989
0.248	-0.0345135	-0.156966	-0.236919	-0.175101	-0.110661	-0.0693243	-0.0396298	-0.0231915	-0.0177889	-0.0180388	-0.0248792
0.249	-0.0345137	-0.156627	-0.236474	-0.174633	-0.110533	-0.0701913	-0.0383972	-0.0230628	-0.0180079	-0.0183774	-0.0257697
0.25	-0.0344262	-0.155858	-0.236077	-0.174549	-0.110597	-0.0716601	-0.0369355	-0.0228017	-0.0180376	-0.0184732	-0.0264086
0.251	-0.0341922	-0.154924	-0.235793	-0.174748	-0.110719	-0.0736495	-0.0354863	-0.0222092	-0.0177474	-0.0183233	-0.0266139
0.252	-0.0338685	-0.153974	-0.235738	-0.175138	-0.110792	-0.0758454	-0.0343724	-0.0211861	-0.0171656	-0.0179703	-0.0262722
0.253	-0.0335085	-0.153081	-0.236011	-0.175689	-0.1108	-0.0778945	-0.0338497	-0.0197392	-0.0165409	-0.0173764	-0.0254861
0.254	-0.0331169	-0.152341	-0.23659	-0.176218	-0.110787	-0.0795333	-0.0340015	-0.0179555	-0.0160665	-0.0165159	-0.0244031
0.255	-0.0327282	-0.151868	-0.237311	-0.176531	-0.110823	-0.0805318	-0.0347519	-0.0158831	-0.015718	-0.0155345	-0.0229933
0.256	-0.0323987	-0.151786	-0.237946	-0.176686	-0.110963	-0.0807051	-0.0359771	-0.0135237	-0.0153772	-0.0146226	-0.0212547
0.257	-0.0321286	-0.152131	-0.238279	-0.176774	-0.111212	-0.0800623	-0.0375816	-0.0109569	-0.0149994	-0.0138232	-0.0194259
0.258	-0.0319162	-0.152716	-0.238158	-0.176865	-0.111598	-0.0787772	-0.039467	-0.00836785	-0.0145597	-0.0130885	-0.0177735
0.259	-0.0317651	-0.153274	-0.237548	-0.177099	-0.112222	-0.0770736	-0.0414511	-0.00588497	-0.0138973	-0.0124054	-0.0164205
0.26	-0.031621	-0.153632	-0.236576	-0.177503	-0.113109	-0.0752439	-0.0432155	-0.00342037	-0.0128095	-0.0118013	-0.0154235
0.261	-0.031457	-0.153733	-0.235491	-0.177969	-0.114066	-0.073625	-0.0443984	-0.000845399	-0.0112415	-0.0113166	-0.0148577
0.262	-0.0312952	-0.153613	-0.234557	-0.178432	-0.114731	-0.0724644	-0.0446663	0.00175261	-0.0093981	-0.0109898	-0.014829
0.263	-0.0310988	-0.153281	-0.233929	-0.178897	-0.114821	-0.0718219	-0.0438445	0.00406816	-0.00774512	-0.0108907	-0.0153405
0.264	-0.0308393	-0.152735	-0.233602	-0.179379	-0.11434	-0.0716264	-0.0421534	0.00572369	-0.0066944	-0.011087	-0.0162574
0.265	-0.0305416	-0.152159	-0.233592	-0.179863	-0.113448	-0.071814	-0.0399852	0.00654307	-0.00631966	-0.0115482	-0.0174395
0.266	-0.0301943	-0.151777	-0.234014	-0.180195	-0.112274	-0.0723646	-0.0376296	0.00669614	-0.00652969	-0.0122302	-0.0187047
0.267	-0.0298502	-0.15161	-0.23488	-0.180131	-0.111076	-0.0732911	-0.035439	0.00651089	-0.00722548	-0.0131303	-0.0197976
0.268	-0.0296781	-0.151647	-0.23598	-0.179538	-0.110256	-0.0745833	-0.0337511	0.00626713	-0.00818045	-0.0141563	-0.0205503
0.269	-0.0298332	-0.151916	-0.236986	-0.178429	-0.110008	-0.0761271	-0.0326691	0.00610144	-0.00914681	-0.0151222	-0.0209503
0.27	-0.0304024	-0.152309	-0.237615	-0.176901	-0.110155	-0.0776739	-0.0321987	0.00605765	-0.0101128	-0.0159187	-0.0210141
0.271	-0.0312741	-0.152613	-0.237753	-0.175176	-0.110345	-0.0788262	-0.0323709	0.00625073	-0.0111937	-0.0165916	-0.0208129
0.272	-0.0320918	-0.15265	-0.237465	-0.173581	-0.110352	-0.0792477	-0.0332079	0.00683099	-0.01244	-0.017192	-0.0205949
0.273	-0.0325173	-0.152287	-0.236807	-0.172326	-0.110142	-0.0788592	-0.0346307	0.00781277	-0.0138568	-0.0176398	-0.0206618
0.274	-0.032388	-0.151508	-0.235752	-0.171276	-0.109724	-0.0776334	-0.0363562	0.00903819	-0.0152839	-0.0178434	-0.0211934
0.275	-0.0316951	-0.150463	-0.234275	-0.170147	-0.109126	-0.0754902	-0.0380753	0.0102217	-0.0163875	-0.0178486	-0.0222434
0.276	-0.0306367	-0.149303	-0.232389	-0.16873	-0.108401	-0.0724977	-0.0396955	0.0110972	-0.0169785	-0.0178174	-0.0238054
0.277	-0.029488	-0.148096	-0.230088	-0.166888	-0.107582	-0.0689793	-0.0412097	0.011622	-0.0171482	-0.0179559	-0.0258114
0.278	-0.0283494	-0.146964	-0.2273	-0.164639	-0.10668	-0.0654848	-0.0424825	0.0119007	-0.0170829	-0.018392	-0.0281483
0.279	-0.0271368	-0.146072	-0.223999	-0.162174	-0.105709	-0.0626503	-0.0433342	0.0119861	-0.0167933	-0.0190624	-0.0307015
0.28	-0.025707	-0.145432	-0.220205	-0.159638	-0.104588	-0.0609794	-0.0437099	0.011901	-0.0161594	-0.0198566	-0.0332736
0.281	-0.0239096	-0.144855	-0.215806	-0.156938	-0.103108	-0.0607733	-0.04368	0.011745	-0.0152708	-0.0207289	-0.035583
0.282	-0.0215306	-0.144021	-0.210603	-0.153848	-0.101165	-0.0620698	-0.0433375	0.0117174	-0.0144479	-0.02148	-0.0374138
0.283	-0.0183496	-0.142564	-0.204417	-0.150185	-0.0988268	-0.0645417	-0.0427191	0.0120514	-0.0140045	-0.0217999	-0.0386656
0.284	-0.0142947	-0.140236	-0.197147	-0.145731	-0.0961776	-0.0677478	-0.0418295	0.012992	-0.0141367	-0.0215189	-0.0393083
0.285	-0.00935479	-0.13695	-0.188792	-0.140292	-0.0932069	-0.0713168	-0.0406986	0.01478	-0.0148017	-0.0205051	-0.039371
0.286	-0.00343658	-0.132712	-0.179396	-0.133912	-0.0897112	-0.0748308	-0.039442	0.0175577	-0.0157234	-0.0185741	-0.038894
0.287	0.00355431	-0.127562	-0.16916	-0.12673	-0.0855271	-0.0780231	-0.0382593	0.0214172	-0.0166362	-0.0155379	-0.0378129
0.288	0.0116162	-0.121458	-0.158523	-0.118855	-0.08092	-0.0808871	-0.0372707	0.0265156	-0.0173639	-0.0113275	-0.0361002
0.289	0.0207012	-0.114274	-0.147941	-0.110411	-0.0765717	-0.0834342	-0.0364482	0.0330351	-0.017725	-0.00614355	-0.033999
0.29	0.0307786	-0.105961	-0.137752	-0.101476	-0.0733759	-0.0858129	-0.0357439	0.04114	-0.0174608	-0.000233602	-0.0317435
0.291	0.0418081	-0.0965961	-0.128111	-0.0921248	-0.0722291	-0.0885311	-0.0351256	0.0509847	-0.0161992	0.00643828	-0.0293023
0.292	0.0536758	-0.0864073	-0.118888	-0.0820711	-0.0736725	-0.0921935	-0.0344828	0.0626505	-0.0136991	0.0141286	-0.0266704
0.293	0.0662469	-0.0757037	-0.109882	-0.0704758	-0.0778405	-0.0973195	-0.0336345	0.0760409	-0.0101125	0.0230901	-0.0239539
0.294	0.0794583	-0.0646795	-0.101204	-0.0573872	-0.0848463	-0.104634	-0.032447	0.0909164	-0.00570205	0.0336579	-0.0211471
0.295	0.0931977	-0.0534377	-0.0932955	-0.0442847	-0.0948589	-0.115105	-0.0308078	0.106981	-0.000565819	0.0462799	-0.0180915
0.296	0.107226	-0.0421201	-0.0865938	-0.032564	-0.107984	-0.129556	-0.0284866	0.123858	0.00522264	0.0612044	-0.0145044
0.297	0.121351	-0.0308162	-0.0813791	-0.0228833	-0.124334	-0.148509	-0.0251927	0.14116	0.0115793	0.0785459	-0.0101172
0.298	0.135511	-0.0194427	-0.077876	-0.0156085	-0.143965	-0.172237	-0.0207499	0.158571	0.018494	0.0984351	-0.00474516
0.299	0.149663	-0.00790696	-0.0763354	-0.0109009	-0.166843	-0.200821	-0.0151562	0.175705	0.0259694	0.120716	0.00191771
0.3	0.163665	0.00367649	-0.0769977	-0.00860181	-0.192947	-0.23432	-0.0085589	0.19209	0.034083	0.145022	0.0102966
0.301	0.17719	0.0150861	-0.0798448	-0.00848099	-0.222275	-0.27271	-0.00111402	0.207419	0.0431003	0.171047	0.0207274
0.302	0.189698	0.0260885	-0.0843404	-0.0103984	-0.254801	-0.315667	0.00712974	0.221694	0.0532119	0.198381	0.033465
0.303	0.200547	0.0363777	-0.0892229	-0.0141227	-0.290482	-0.362735	0.0160839	0.235034	0.0643663	0.226576	0.048814
0.304	0.209256	0.0456744	-0.0921381	-0.0193413	-0.329399	-0.413994	0.0255015	0.247368	0.0764728	0.255305	0.0669707
0.305	0.215694	0.0538145	-0.0896458	-0.0254952	-0.372227	-0.47133	0.0350884	0.258366	0.0893511	0.284024	0.0877017
0.306	0.219961	0.0605673	-0.0778411	-0.0312503	-0.439115	-0.539811	0.0445612	0.267524	0.102684	0.312009	0.110469
0.307	0.222519	0.0656005	-0.0530513	-0.0343587	-0.573809	-0.629764	0.053609	0.274104	0.116237	0.338899	0.134729
0.308	0.224712	0.0688263	-0.0127418	-0.0318155	-0.782674	-0.759623	0.061951	0.277175	0.129744	0.364598	0.159904
0.309	0.228862	0.0707732	0.0435583	-0.0200957	-1.0148	-0.936593	0.0694872	0.248693	0.142745	0.388877	0.185342
0.31	0.238036	0.0728834	0.114012	0.00393677	-1.22873	-1.12247	0.0763713	0.108916	0.154777	0.411407	0.210509
0.311	0.255876	0.0777399	0.194748	0.0417642	-1.42558	-1.25233	0.0828684	-0.191962	0.165277	0.43178	0.235053
0.312	0.285943	0.0889962	0.280531	0.0926315	-1.63198	-1.28924	0.0891021	-0.58255	0.173421	0.449398	0.2587
0.313	0.330528	0.11081	0.365912	0.153705	-1.8819	-1.23891	0.0949406	-0.938187	0.17828	0.463461	0.281206
0.314	0.389707	0.14687	0.446176	0.220617	-2.202	-1.13301	0.100165	-1.18679	0.178899	0.472885	0.302431
0.315	0.461057	0.199219	0.51764	0.288374	-2.60659	-1.01472	0.104632	-1.29973	0.174386	0.476631	0.322428
0.316	0.540123	0.267296	0.577674	0.352329	-3.10288	-0.92828	0.108064	-1.25341	0.164073	0.474746	0.341204
0.317	0.621403	0.347754	0.624662	0.408736	-3.6924	-0.907991	0.109905	-1.04089	0.147511	0.468933	0.358436
0.318	0.699403	0.43511	0.657866	0.455014	-4.36555	-0.968912	0.109569	-0.68456	0.124583	0.462376	0.373618
0.319	0.769663	0.522936	0.677481	0.489706	-5.09664	-1.10604	0.106691	-0.226907	0.095907	0.45979	0.386197
0.32	0.829346	0.605315	0.684875	0.512088	-5.84291	-1.30279	0.10129	0.282065	0.0631492	0.467016	0.395481
0.321	0.877077	0.677779	0.682899	0.522006	-6.55156	-1.54016	0.0939973	0.794277	0.0287748	0.489615	0.400655
0.322	0.912632	0.737417	0.676074	0.519462	-7.17752	-1.79969	0.0861892	1.26938	-0.00618553	0.531463	0.401231
0.323	0.93681	0.782717	0.66988	0.502514	-7.70064	-2.06157	0.0800373	1.67817	-0.0454739	0.593743	0.397753
0.324	0.951062	0.813392	0.668912	0.466768	-8.12506	-2.30072	0.0785512	2.00363	-0.0960077	0.674755	0.392233
0.325	0.95696	0.830069	0.675398	0.409884	-8.46448	-2.48532	0.085097	2.23951	-0.161195	0.770973	0.388328
0.326	0.956083	0.834091	0.689421	0.335586	-8.73157	-2.58375	0.0739689	2.38806	-0.237479	0.878162	0.391104
0.327	0.950303	0.827714	0.709975	0.252654	-8.93151	-2.57517	-0.0205625	2.45765	-0.316875	0.991849	0.406044
0.328	0.941905	0.81448	0.73581	0.171617	-9.0485	-2.45451	-0.213663	2.46047	-0.390914	1.10814	0.437713
0.329	0.933421	0.799175	0.766262	0.101744	-9.03943	-2.23119	-0.425942	2.411	-0.45683	1.22453	0.488776
0.33	0.927449	0.786849	0.801597	0.0496121	-8.85205	-1.92465	-0.570266	2.32536	-0.522083	1.33964	0.53877
0.331	0.926644	0.781274	0.842238	0.0190989	-8.4518	-1.55984	-0.608532	2.22052	-0.593329	1.4526	0.535022
0.332	0.933518	0.78438	0.887786	0.0117009	-7.83524	-1.16386	-0.540795	2.11309	-0.664085	1.56296	0.456757
0.333	0.95009	0.797007	0.936698	0.0282161	-7.0278	-0.762843	-0.388403	2.01768	-0.721411	1.67031	0.346501
0.334	0.978006	0.819813	0.986379	0.0721975	-6.07463	-0.379328	-0.181677	1.94479	-0.75467	1.774	0.25368
0.335	1.01908	0.853886	1.03369	0.149763	-5.03201	-0.0312054	0.047991	1.89959	-0.754697	1.87384	0.209611
0.336	1.07526	0.900766	1.07579	0.262987	-3.96167	0.269152	0.272793	1.88221	-0.713825	1.97125	0.237398
0.337	1.14733	0.961407	1.11085	0.404029	-2.92525	0.515441	0.470733	1.88875	-0.628402	2.06908	0.346503
0.338	1.23314	1.03494	1.13833	0.555508	-1.97539	0.706746	0.626624	1.91264	-0.499087	2.17031	0.530744
0.339	1.32708	1.11821	1.15871	0.695856	-1.14738	0.846386	0.73282	1.94681	-0.330523	2.27631	0.774097
0.34	1.42148	1.20632	1.17274	0.805982	-0.457789	0.940364	0.789025	1.98615	-0.130869	2.38614	1.05623
0.341	1.50872	1.29385	1.18073	0.873074	0.0911981	0.994907	0.800634	2.02931	0.091722	2.49717	1.3564
0.342	1.58288	1.37607	1.18199	0.891913	0.506946	1.0152	0.776523	2.07927	0.330899	2.60573	1.65533
0.343	1.64026	1.44901	1.17467	0.865144	0.802955	1.00632	0.727345	2.14111	0.57934	2.70785	1.93594
0.344	1.67906	1.50904	1.1559	0.80135	0.995807	0.974067	0.664138	2.21836	0.827427	2.79989	2.18392
0.345	1.69856	1.55279	1.1221	0.711619	1.10254	0.925141	0.596635	2.31103	1.0644	2.87803	2.38847
0.346	1.69796	1.57774	1.06929	0.606855	1.13844	0.865299	0.531951	2.41594	1.2794	2.93813	2.54294
0.347	1.67615	1.58257	0.993323	0.496213	1.11513	0.79333	0.475012	2.52783	1.46289	2.97701	2.64507
0.348	1.63184	1.56706	0.890189	0.385644	1.04196	0.698089	0.429883	2.64054	1.60873	2.99336	2.6965
0.349	1.56369	1.53178	0.756558	0.277241	0.929795	0.56482	0.399731	2.74728	1.71548	2.98781	2.70238
0.35	1.47011	1.47756	0.590691	0.17002	0.790455	0.384271	0.385524	2.84031	1.78639	2.96301	2.67132
0.351	1.34921	1.40494	0.393564	0.0610554	0.632722	0.157345	0.385782	2.91124	1.82761	2.92343	2.61489
0.352	1.19883	1.31395	0.16941	-0.0532125	0.462181	-0.106144	0.397739	2.95171	1.8428	2.87455	2.54609
0.353	1.01679	1.20396	-0.0744626	-0.175594	0.283417	-0.391343	0.418549	2.95332	1.82626	2.82187	2.47724
0.354	0.801711	1.07364	-0.328136	-0.307244	0.100587	-0.680843	0.445841	2.90784	1.76524	2.76994	2.41764
0.355	0.554356	0.921236	-0.58012	-0.446862	-0.0827223	-0.956686	0.477557	2.80783	1.65324	2.72111	2.37231
0.356	0.278961	0.74508	-0.818787	-0.590254	-0.264068	-1.203	0.511598	2.64706	1.49955	2.67513	2.34249
0.357	-0.0162433	0.54461	-1.03358	-0.731264	-0.442794	-1.4086	0.546015	2.42122	1.32641	2.62963	2.32664
0.358	-0.319657	0.321362	-1.21602	-0.863331	-0.620148	-1.56894	0.57936	2.12917	1.16019	2.58004	2.32172
0.359	-0.617856	0.0794577	-1.36054	-0.980383	-0.800653	-1.68477	0.610498	1.77372	1.02387	2.51967	2.32449
0.36	-0.897253	-0.174306	-1.46456	-1.0774	-0.991833	-1.75736	0.638141	1.36244	0.93213	2.44018	2.33187
0.361	-1.14552	-0.430868	-1.52839	-1.15101	-1.19935	-1.78567	0.660662	0.908025	0.888987	2.33205	2.34069
0.362	-1.35274	-0.679928	-1.55458	-1.1995	-1.42337	-1.76828	0.675969	0.427212	0.887972	2.18542	2.34778
0.363	-1.51229	-0.91127	-1.54739	-1.22275	-1.65792	-1.7065	0.681409	-0.0609336	0.914184	1.99148	2.34979
0.364	-1.62114	-1.1159	-1.51218	-1.22222	-1.89	-1.60546	0.674177	-0.536543	0.946915	1.74364	2.34299
0.365	-1.67966	-1.28681	-1.45491	-1.20058	-2.10102	-1.47332	0.651755	-0.980759	0.962915	1.43878	2.32311
0.366	-1.69113	-1.41949	-1.38163	-1.16125	-2.27157	-1.32018	0.611854	-1.3775	0.940195	1.07883	2.28521
0.367	-1.66106	-1.51187	-1.29814	-1.10807	-2.38605	-1.15647	0.552277	-1.71447	0.861389	0.671498	2.22349
0.368	-1.59652	-1.56444	-1.2098	-1.04504	-2.43566	-0.991561	0.471075	-1.98384	0.716395	0.229438	2.13176
0.369	-1.50529	-1.5801	-1.12115	-0.976036	-2.41949	-0.83343	0.367102	-2.18238	0.504116	-0.230957	2.00408
0.37	-1.39534	-1.56346	-1.03549	-0.904765	-2.34337	-0.688236	0.24103	-2.31095	0.232172	-0.691425	1.83496
0.371	-1.27428	-1.51998	-0.955249	-0.834403	-2.21754	-0.559956	0.0963257	-2.37378	-0.0851087	-1.13398	1.62016
0.372	-1.14874	-1.45557	-0.882103	-0.76737	-2.05498	-0.450833	-0.0606956	-2.37791	-0.428949	-1.54246	1.35776
0.373	-1.02419	-1.3761	-0.816879	-0.705459	-1.8696	-0.361785	-0.221687	-2.33222	-0.778674	-1.90363	1.04882
0.374	-0.905077	-1.28704	-0.759708	-0.649823	-1.67425	-0.29227	-0.377588	-2.24641	-1.1144	-2.20786	0.698151
0.375	-0.794735	-1.19343	-0.710346	-0.600935	-1.47978	-0.240795	-0.520075	-2.13053	-1.4188	-2.44925	0.31473
0.376	-0.695297	-1.09972	-0.668298	-0.558783	-1.29497	-0.205537	-0.642336	-1.99423	-1.67811	-2.62569	-0.0888863
0.377	-0.607749	-1.00942	-0.632908	-0.523018	-1.12614	-0.183941	-0.739302	-1.84597	-1.88312	-2.73866	-0.49791
0.378	-0.532121	-0.924936	-0.603433	-0.492941	-0.977279	-0.172798	-0.808034	-1.69295	-2.02956	-2.79247	-0.896865
0.379	-0.467813	-0.847699	-0.579005	-0.467555	-0.850427	-0.169011	-0.847922	-1.54092	-2.11788	-2.79329	-1.27122
0.38	-0.413731	-0.778491	-0.558692	-0.445781	-0.745893	-0.169749	-0.86039	-1.39436	-2.15173	-2.74913	-1.60854
0.381	-0.368407	-0.717596	-0.541583	-0.426745	-0.662456	-0.172645	-0.848561	-1.25678	-2.13642	-2.66941	-1.89899
0.382	-0.330353	-0.664807	-0.526762	-0.409833	-0.597824	-0.176176	-0.816764	-1.13048	-2.07872	-2.56282	-2.13574
0.383	-0.29829	-0.619481	-0.513392	-0.394528	-0.549011	-0.179464	-0.769885	-1.0164	-1.98697	-2.43639	-2.31561
0.384	-0.271166	-0.580742	-0.500878	-0.380395	-0.5128	-0.181991	-0.712954	-0.914852	-1.87027	-2.29645	-2.43927
0.385	-0.247986	-0.547625	-0.488767	-0.36722	-0.486213	-0.183497	-0.650694	-0.825718	-1.73728	-2.14864	-2.50997
0.386	-0.22772	-0.519081	-0.476748	-0.35479	-0.466411	-0.183686	-0.587116	-0.748059	-1.59574	-1.99802	-2.53208
0.387	-0.209554	-0.494034	-0.464951	-0.342693	-0.450661	-0.182287	-0.525403	-0.680549	-1.45237	-1.84902	-2.51067
0.388	-0.192957	-0.471561	-0.453752	-0.33061	-0.436935	-0.179379	-0.467931	-0.621749	-1.31244	-1.70515	-2.45186
0.389	-0.177543	-0.450968	-0.443279	-0.318486	-0.423939	-0.175178	-0.416299	-0.569979	-1.17972	-1.56917	-2.36277
0.39	-0.163052	-0.431725	-0.433424	-0.306346	-0.410749	-0.169915	-0.371436	-0.523748	-1.05673	-1.44316	-2.25083
0.391	-0.149297	-0.413486	-0.423989	-0.294402	-0.396896	-0.164044	-0.333754	-0.482663	-0.94469	-1.32806	-2.12323
0.392	-0.136106	-0.396196	-0.414708	-0.283133	-0.382252	-0.157839	-0.303097	-0.447415	-0.844109	-1.22399	-1.98674
0.393	-0.123395	-0.379966	-0.40536	-0.272851	-0.366777	-0.151214	-0.278843	-0.417768	-0.755332	-1.13076	-1.8473
0.394	-0.111146	-0.364833	-0.395838	-0.263527	-0.350646	-0.14434	-0.26022	-0.391611	-0.678162	-1.04762	-1.7098
0.395	-0.0993146	-0.350788	-0.386168	-0.255053	-0.334261	-0.137731	-0.246235	-0.366564	-0.61176	-0.973301	-1.57821
0.396	-0.0879753	-0.337815	-0.376545	-0.247334	-0.318099	-0.131744	-0.235742	-0.34139	-0.554999	-0.906534	-1.45518
0.397	-0.0774055	-0.325784	-0.367211	-0.240337	-0.302712	-0.126562	-0.2278	-0.316104	-0.506411	-0.846077	-1.34197
0.398	-0.0678278	-0.31455	-0.35833	-0.234277	-0.288504	-0.122263	-0.221493	-0.291136	-0.464426	-0.790738	-1.23897
0.399	-0.0592936	-0.304135	-0.350022	-0.229411	-0.275462	-0.118775	-0.215903	-0.266637	-0.427916	-0.739684	-1.14603
0.4	-0.0517512	-0.294574	-0.342345	-0.225668	-0.2635	-0.116263	-0.210599	-0.242639	-0.395962	-0.692154	-1.06242
0.401	-0.0450885	-0.285653	-0.335282	-0.222734	-0.252721	-0.11505	-0.205511	-0.219167	-0.367558	-0.647261	-0.987164
0.402	-0.0391968	-0.276958	-0.328894	-0.220276	-0.243043	-0.114847	-0.200549	-0.19641	-0.341788	-0.604413	-0.919284
0.403	-0.0339478	-0.268195	-0.323297	-0.218066	-0.234213	-0.114966	-0.195675	-0.174957	-0.317864	-0.563319	-0.857742
0.404	-0.0291862	-0.259306	-0.318442	-0.21606	-0.226224	-0.11505	-0.19086	-0.155323	-0.295201	-0.523901	-0.801642
0.405	-0.0248484	-0.250358	-0.314106	-0.214222	-0.219148	-0.114898	-0.186107	-0.137617	-0.273572	-0.4866	-0.750265
0.406	-0.0210252	-0.241529	-0.310082	-0.212358	-0.212997	-0.114333	-0.181644	-0.121943	-0.252918	-0.452117	-0.702964
0.407	-0.0178838	-0.233079	-0.306275	-0.210295	-0.207826	-0.113384	-0.177677	-0.108374	-0.23322	-0.420769	-0.659211
0.408	-0.015472	-0.22518	-0.302645	-0.207969	-0.203481	-0.112108	-0.174109	-0.0967371	-0.214639	-0.392517	-0.618537
0.409	-0.0136547	-0.217856	-0.299149	-0.205396	-0.199668	-0.110512	-0.17078	-0.0868859	-0.197237	-0.367178	-0.580401
0.41	-0.0122222	-0.211209	-0.295729	-0.202714	-0.196338	-0.108791	-0.167542	-0.0787418	-0.180809	-0.344483	-0.544422
0.411	-0.0109152	-0.205525	-0.292392	-0.200022	-0.193545	-0.107246	-0.164074	-0.0720704	-0.165291	-0.324263	-0.510547
0.412	-0.00953885	-0.200998	-0.28921	-0.197318	-0.191224	-0.106093	-0.160257	-0.0667325	-0.150732	-0.306256	-0.478764
0.413	-0.00806032	-0.197494	-0.286083	-0.194738	-0.189378	-0.105385	-0.156524	-0.0628122	-0.137008	-0.289919	-0.449105
0.414	-0.00649911	-0.1946	-0.282764	-0.192518	-0.187975	-0.104846	-0.153364	-0.0601877	-0.124185	-0.27489	-0.421746
0.415	-0.00489816	-0.19184	-0.279196	-0.190762	-0.18664	-0.104152	-0.150883	-0.0584551	-0.112562	-0.261091	-0.396675
0.416	-0.00333759	-0.188897	-0.27551	-0.189495	-0.184915	-0.103391	-0.148996	-0.0571791	-0.102274	-0.248287	-0.373715
0.417	-0.00189812	-0.185684	-0.271753	-0.188628	-0.18265	-0.102939	-0.148331	-0.0559929	-0.0934354	-0.236268	-0.35276
0.418	-0.000709923	-0.182243	-0.26797	-0.187886	-0.179867	-0.103091	-0.150312	-0.0548051	-0.0861099	-0.225032	-0.333505
0.419	5.3e-06	-0.178578	-0.264294	-0.187082	-0.176684	-0.10379	-0.154772	-0.0537205	-0.0799501	-0.214423	-0.315475
0.42	0.000147233	-0.174611	-0.260768	-0.18621	-0.173589	-0.104517	-0.159302	-0.0526215	-0.0744947	-0.20423	-0.298455
0.421	-0.000123227	-0.170321	-0.257382	-0.18516	-0.171253	-0.104716	-0.161974	-0.052396	-0.0695705	-0.194424	-0.282395
0.422	-0.000713984	-0.165835	-0.254145	-0.18371	-0.170003	-0.104318	-0.162502	-0.0567822	-0.0650871	-0.18497	-0.267139
0.423	-0.00177393	-0.161352	-0.251022	-0.181787	-0.169661	-0.103429	-0.161318	-0.0701878	-0.0609118	-0.175975	-0.252588
0.424	-0.00340523	-0.157071	-0.247992	-0.179537	-0.169705	-0.101943	-0.158962	-0.0937048	-0.0570109	-0.167863	-0.238846
0.425	-0.00548832	-0.153079	-0.245052	-0.177211	-0.16961	-0.0999369	-0.155977	-0.124636	-0.0533202	-0.160875	-0.226162
0.426	-0.00775442	-0.149283	-0.242114	-0.175004	-0.168992	-0.0976967	-0.152789	-0.158239	-0.0497666	-0.155049	-0.214756
0.427	-0.00995743	-0.145599	-0.239073	-0.17291	-0.167547	-0.0952148	-0.14964	-0.189484	-0.0464529	-0.150573	-0.204677
0.428	-0.0119829	-0.142082	-0.235851	-0.170879	-0.165173	-0.0924591	-0.146763	-0.214384	-0.0434043	-0.147365	-0.195829
0.429	-0.0137248	-0.138746	-0.232372	-0.169003	-0.162014	-0.0896941	-0.144399	-0.2302	-0.0405473	-0.144999	-0.188114
0.43	-0.0150322	-0.135535	-0.228707	-0.167244	-0.158246	-0.0871335	-0.142697	-0.235421	-0.0380311	-0.14327	-0.181911
0.431	-0.0158051	-0.132494	-0.225072	-0.165365	-0.154138	-0.0849595	-0.141775	-0.230081	-0.03601	-0.142073	-0.178094
0.432	-0.0159152	-0.129695	-0.221626	-0.163302	-0.150233	-0.0834559	-0.141636	-0.215432	-0.0344355	-0.141149	-0.176465
0.433	-0.0152036	-0.127075	-0.218485	-0.161188	-0.146961	-0.0826958	-0.142107	-0.19349	-0.033417	-0.140299	-0.17527
0.434	-0.0136691	-0.124482	-0.215785	-0.159128	-0.144426	-0.0825507	-0.143037	-0.166851	-0.0332198	-0.139318	-0.172778
0.435	-0.0114497	-0.121841	-0.213572	-0.157144	-0.142766	-0.0828875	-0.144321	-0.138063	-0.0337939	-0.137927	-0.168288
0.436	-0.00868922	-0.11922	-0.211647	-0.155277	-0.141937	-0.0833632	-0.145823	-0.10911	-0.0348219	-0.136117	-0.161872
0.437	-0.00549373	-0.116627	-0.209684	-0.153642	-0.141469	-0.0834996	-0.147534	-0.0815487	-0.0360464	-0.1341	-0.153713
0.438	-0.00191223	-0.11387	-0.207512	-0.152303	-0.140911	-0.0831441	-0.149571	-0.0565081	-0.0372568	-0.132016	-0.144268
0.439	0.00200125	-0.110791	-0.205111	-0.15115	-0.139985	-0.0823416	-0.151846	-0.0346854	-0.0383262	-0.130128	-0.134495
0.44	0.00608985	-0.107503	-0.202516	-0.150013	-0.138597	-0.0811136	-0.154178	-0.0166789	-0.0391442	-0.128798	-0.125059
0.441	0.0101369	-0.104221	-0.199815	-0.148873	-0.136913	-0.0796388	-0.156546	-0.00293536	-0.0393977	-0.128108	-0.116086
0.442	0.0139723	-0.101047	-0.197064	-0.147836	-0.135088	-0.0780315	-0.158826	0.0064972	-0.038942	-0.128088	-0.10765
0.443	0.0175297	-0.0980315	-0.19426	-0.147015	-0.133223	-0.0762195	-0.160929	0.0119223	-0.0381351	-0.128929	-0.0998876
0.444	0.0208436	-0.0952014	-0.191444	-0.146522	-0.131541	-0.0743152	-0.163082	0.0140229	-0.0374735	-0.130438	-0.0931406
0.445	0.0240212	-0.0924497	-0.188721	-0.146425	-0.130198	-0.072446	-0.165233	0.0137428	-0.0373167	-0.132041	-0.087877
0.446	0.0272006	-0.0896026	-0.186184	-0.1467	-0.129147	-0.0705595	-0.166912	0.0116826	-0.0378249	-0.133254	-0.0842456
0.447	0.0304592	-0.086617	-0.183947	-0.147314	-0.128416	-0.0687775	-0.167816	0.00789951	-0.0387936	-0.133494	-0.0821455
0.448	0.0338144	-0.083569	-0.182156	-0.14816	-0.128151	-0.0671549	-0.167837	0.00245581	-0.0398412	-0.132385	-0.0814945
0.449	0.0373252	-0.0805153	-0.180918	-0.148959	-0.128355	-0.0654306	-0.166963	-0.00441658	-0.0408478	-0.130245	-0.0820722
0.45	0.0410129	-0.0775835	-0.180262	-0.14948	-0.128936	-0.0636117	-0.165461	-0.0124085	-0.0418167	-0.127595	-0.0834754
0.451	0.0447275	-0.0750224	-0.180053	-0.149792	-0.129873	-0.062034	-0.163828	-0.0208532	-0.042533	-0.124888	-0.0853124
0.452	0.0482814	-0.0729256	-0.179978	-0.150032	-0.131174	-0.0608873	-0.162483	-0.0290503	-0.0427705	-0.122545	-0.0870708
0.453	0.0515803	-0.0711482	-0.179742	-0.150238	-0.132926	-0.0602745	-0.1616	-0.0367845	-0.0425233	-0.120676	-0.0880931
0.454	0.0545613	-0.0695632	-0.179223	-0.150518	-0.135174	-0.0602111	-0.161093	-0.0438759	-0.0419626	-0.119197	-0.0880721
0.455	0.0571723	-0.0681764	-0.178431	-0.150954	-0.137641	-0.0604443	-0.160809	-0.0498962	-0.041342	-0.118054	-0.0870959
0.456	0.0593416	-0.0670004	-0.177364	-0.151426	-0.139984	-0.0607943	-0.160733	-0.0544599	-0.0407597	-0.117023	-0.0852964
0.457	0.0609775	-0.0659703	-0.17591	-0.151779	-0.142059	-0.0612671	-0.160929	-0.0572125	-0.040232	-0.115826	-0.0830037
0.458	0.0621021	-0.0650116	-0.173957	-0.15197	-0.143748	-0.0616501	-0.161473	-0.057913	-0.0399645	-0.114568	-0.0806532
0.459	0.062807	-0.0640861	-0.171594	-0.152032	-0.144946	-0.0616191	-0.162424	-0.0567859	-0.040045	-0.113589	-0.0783876
0.46	0.0631515	-0.0631611	-0.169115	-0.152022	-0.145643	-0.061099	-0.163623	-0.0542931	-0.0402721	-0.113085	-0.0763275
0.461	0.063219	-0.0621961	-0.166716	-0.151847	-0.145799	-0.0601498	-0.1647	-0.0508007	-0.0405211	-0.11323	-0.0747455
0.462	0.0631263	-0.0611715	-0.16441	-0.151259	-0.145476	-0.058887	-0.165435	-0.0469369	-0.0407464	-0.114058	-0.0737884
0.463	0.0629965	-0.0601235	-0.162275	-0.150191	-0.145049	-0.0576135	-0.165848	-0.0434487	-0.0407665	-0.115045	-0.073428
0.464	0.0628735	-0.0591173	-0.160544	-0.148848	-0.144883	-0.0565804	-0.165917	-0.0406644	-0.0404052	-0.11552	-0.0734368
0.465	0.0627529	-0.0581645	-0.159408	-0.147478	-0.145005	-0.0558244	-0.165496	-0.0387207	-0.0396062	-0.115118	-0.0734703
0.466	0.0627531	-0.0572014	-0.158856	-0.146301	-0.145298	-0.0554299	-0.164437	-0.037552	-0.0384909	-0.113632	-0.0733523
0.467	0.0629651	-0.0561661	-0.158754	-0.145415	-0.145652	-0.0554357	-0.16271	-0.0366955	-0.0374806	-0.111239	-0.0730047
0.468	0.0632673	-0.0550298	-0.158986	-0.144736	-0.146137	-0.0556864	-0.160559	-0.0357642	-0.036982	-0.108392	-0.0722587
0.469	0.0635425	-0.0537619	-0.159525	-0.144255	-0.152574	-0.0560641	-0.15832	-0.0346322	-0.0369696	-0.105176	-0.0710145
0.47	0.0638475	-0.0524005	-0.160367	-0.144078	-0.181248	-0.0564914	-0.15615	-0.0332302	-0.0371652	-0.101426	-0.0692927
0.471	0.0642716	-0.0510986	-0.161378	-0.144143	-0.245143	-0.0568883	-0.154289	-0.0316273	-0.0373402	-0.0970977	-0.0670388
0.472	0.0648401	-0.0500708	-0.162344	-0.144279	-0.33873	-0.0572736	-0.153146	-0.0299355	-0.0372498	-0.0921296	-0.0642073
0.473	0.0655153	-0.0495287	-0.163148	-0.144427	-0.44384	-0.0575687	-0.152876	-0.0280293	-0.0367205	-0.0865841	-0.0609952
0.474	0.0661697	-0.0495504	-0.163806	-0.144539	-0.541602	-0.0575009	-0.153288	-0.025797	-0.0358605	-0.0808782	-0.0577328
0.475	0.0666454	-0.0500274	-0.164362	-0.144526	-0.61782	-0.0569311	-0.154053	-0.0234703	-0.0348068	-0.0754538	-0.0547188
0.476	0.0668679	-0.0507111	-0.164766	-0.144349	-0.664353	-0.0559291	-0.154768	-0.0212468	-0.0336199	-0.0705823	-0.0522298
0.477	0.0668559	-0.0513186	-0.164928	-0.143998	-0.67854	-0.0546244	-0.155176	-0.0190329	-0.0324109	-0.066417	-0.0503297
0.478	0.0666477	-0.0516992	-0.16482	-0.14358	-0.662144	-0.0532865	-0.155319	-0.0168251	-0.0310888	-0.0628083	-0.0488289
0.479	0.0662764	-0.0518609	-0.164508	-0.14337	-0.620077	-0.0521937	-0.15529	-0.014827	-0.029511	-0.0594599	-0.0475928
0.48	0.0658051	-0.0518486	-0.164177	-0.143549	-0.559037	-0.0514643	-0.155132	-0.0133016	-0.0278238	-0.0563379	-0.0465316
0.481	0.06531	-0.0517652	-0.164014	-0.144129	-0.486488	-0.0513028	-0.154859	-0.0124528	-0.0261628	-0.053555	-0.0454989
0.482	0.0647949	-0.0518173	-0.164025	-0.145045	-0.409605	-0.0519333	-0.154276	-0.0121477	-0.0245206	-0.0511785	-0.0444664
0.483	0.0641951	-0.0520621	-0.164131	-0.146082	-0.334317	-0.0532099	-0.153178	-0.0120426	-0.0228992	-0.0492264	-0.0434135
0.484	0.0634646	-0.052336	-0.164388	-0.147006	-0.265192	-0.0547572	-0.151745	-0.0119856	-0.0211611	-0.0474083	-0.042131
0.485	0.0626134	-0.0524493	-0.164845	-0.147815	-0.205523	-0.0562774	-0.150264	-0.0118758	-0.0190194	-0.0455123	-0.040539
0.486	0.0618012	-0.0522353	-0.165361	-0.148589	-0.15707	-0.0575692	-0.148817	-0.0115585	-0.0164516	-0.0441376	-0.0387436
0.487	0.0612924	-0.0516763	-0.165789	-0.149284	-0.12011	-0.0586298	-0.14752	-0.011031	-0.0136844	-0.043727	-0.0366413
0.488	0.0611656	-0.0509518	-0.166093	-0.149819	-0.0939325	-0.0595381	-0.146546	-0.0102844	-0.010778	-0.0436461	-0.0340533
0.489	0.0612736	-0.0502259	-0.16631	-0.150083	-0.0772645	-0.0600735	-0.145943	-0.00922424	-0.00772898	-0.0430717	-0.0309579
0.49	0.0614413	-0.0495806	-0.166541	-0.149945	-0.0686445	-0.0600234	-0.145755	-0.00787816	-0.00457722	-0.0415165	-0.0273399
0.491	0.0615745	-0.0490307	-0.166841	-0.149438	-0.0665942	-0.0595617	-0.146033	-0.00630109	-0.0014125	-0.0386938	-0.0233825
0.492	0.061647	-0.0485098	-0.167176	-0.148728	-0.0694302	-0.0587658	-0.146676	-0.00453456	0.00131739	-0.0347759	-0.0195938
0.493	0.0615441	-0.0480021	-0.167547	-0.147977	-0.0753957	-0.057552	-0.147459	-0.00274472	0.00302983	-0.0303145	-0.0163388
0.494	0.0610906	-0.0475903	-0.167925	-0.147385	-0.0830584	-0.0562004	-0.148109	-0.000998144	0.00354919	-0.0258611	-0.0137821
0.495	0.0602732	-0.0474183	-0.168215	-0.147073	-0.0912869	-0.0550648	-0.148425	0.000867691	0.00304895	-0.0220918	-0.0121388
0.496	0.0591749	-0.0476785	-0.168415	-0.146965	-0.0992453	-0.0540614	-0.148473	0.00292053	0.00177784	-0.0196534	-0.0114605
0.497	0.057848	-0.0484051	-0.168601	-0.146907	-0.106503	-0.0529183	-0.148438	0.00508671	-6.12e-05	-0.0184421	-0.0116271
0.498	0.0564592	-0.0493448	-0.168906	-0.146741	-0.112739	-0.0515213	-0.148313	0.00725043	-0.00233697	-0.0177744	-0.0124459
0.499	0.0552302	-0.0501904	-0.16947	-0.146345	-0.117606	-0.0500722	-0.147973	0.00905289	-0.00476097	-0.0171033	-0.0134525
0.5	0.0541493	-0.0508046	-0.17027	-0.145678	-0.120997	-0.0490695	-0.147344	0.0101808	-0.00674907	-0.0160576	-0.014141
0.501	0.0530713	-0.0511536	-0.17116	-0.144732	-0.123018	-0.0488117	-0.146287	0.0108352	-0.00777788	-0.0144631	-0.0142801
0.502	0.0519362	-0.051177	-0.172074	-0.143517	-0.123783	-0.0491529	-0.144715	0.0112932	-0.00761164	-0.0123969	-0.013714
0.503	0.0507129	-0.0507898	-0.172994	-0.142087	-0.123463	-0.0498677	-0.142878	0.011652	-0.00614583	-0.00988244	-0.0123575
0.504	0.0493807	-0.0499558	-0.17374	-0.140449	-0.122253	-0.0507321	-0.141143	0.0122192	-0.00344171	-0.00674811	-0.0103954
0.505	0.047989	-0.0487982	-0.174001	-0.138474	-0.120323	-0.0513987	-0.139783	0.0133093	0.000231151	-0.00271913	-0.00806429
0.506	0.0466857	-0.0476485	-0.1736	-0.136134	-0.11795	-0.0516715	-0.138977	0.0149939	0.00456156	0.00219206	-0.00554949
0.507	0.0457226	-0.0468897	-0.172562	-0.133668	-0.115434	-0.0515706	-0.13869	0.0173433	0.00920228	0.00735839	-0.00320624
0.508	0.0453064	-0.0466867	-0.170996	-0.131263	-0.112857	-0.0510191	-0.138802	0.0202766	0.0137748	0.0119228	-0.00135443
0.509	0.0454127	-0.0469022	-0.169019	-0.128951	-0.110229	-0.0499388	-0.139294	0.0233862	0.0180733	0.0153714	-0.000107746
0.51	0.0458671	-0.0472352	-0.166725	-0.126816	-0.107703	-0.0483623	-0.140026	0.0262966	0.0220732	0.0175158	0.000297087
0.511	0.0465193	-0.0473805	-0.164288	-0.124892	-0.105482	-0.0463292	-0.140716	0.0287822	0.0257051	0.0181754	-0.000316874
0.512	0.0473177	-0.0471384	-0.161902	-0.123095	-0.103816	-0.0441206	-0.141247	0.0305897	0.0288977	0.0173537	-0.00172976
0.513	0.0483554	-0.0464273	-0.159591	-0.121478	-0.102841	-0.0421787	-0.141618	0.0315672	0.0316829	0.0153048	-0.00372474
0.514	0.0497475	-0.0452613	-0.157278	-0.120213	-0.102339	-0.0406851	-0.141768	0.0316716	0.0339243	0.0122068	-0.00610972
0.515	0.0514456	-0.0437768	-0.154958	-0.11936	-0.102132	-0.0397219	-0.141654	0.0308142	0.0352936	0.00835661	-0.00831282
0.516	0.0532806	-0.0421608	-0.152715	-0.118833	-0.102341	-0.0394347	-0.141268	0.0290383	0.0355505	0.00433195	-0.00971516
0.517	0.0551089	-0.0405495	-0.150707	-0.118335	-0.103037	-0.0397946	-0.140572	0.0265872	0.0345894	0.0006123	-0.0100555
0.518	0.0568125	-0.039015	-0.149168	-0.117513	-0.104144	-0.0406831	-0.139539	0.0237975	0.0325848	-0.0024836	-0.00931909
0.519	0.0582508	-0.0375658	-0.148164	-0.116305	-0.105535	-0.0420267	-0.138136	0.0212021	0.029983	-0.00465815	-0.00774511
0.52	0.0593622	-0.0361802	-0.147512	-0.114875	-0.10685	-0.0435865	-0.136307	0.019414	0.0271029	-0.00580093	-0.00572475
0.521	0.0602616	-0.0347819	-0.147068	-0.113275	-0.107689	-0.0450521	-0.134214	0.0187842	0.0241154	-0.00584763	-0.0034513
0.522	0.0611693	-0.0332756	-0.146784	-0.111407	-0.108038	-0.046322	-0.132181	0.0194836	0.0212171	-0.0046707	-0.0010775
0.523	0.062302	-0.0317229	-0.146481	-0.109266	-0.108138	-0.0473611	-0.130343	0.0216809	0.0185347	-0.0025348	0.00109173
0.524	0.0638034	-0.0303134	-0.145843	-0.107042	-0.108208	-0.0481062	-0.128774	0.0253496	0.0162573	-7.71e-05	0.0029342
0.525	0.0656398	-0.0291575	-0.144641	-0.104993	-0.108363	-0.0485829	-0.127623	0.0302292	0.0147569	0.0021339	0.00443423
0.526	0.0675501	-0.0281922	-0.142875	-0.103233	-0.108466	-0.0487377	-0.126826	0.0358898	0.0141984	0.00355235	0.005425
0.527	0.0692418	-0.0272662	-0.140725	-0.101708	-0.108283	-0.0484231	-0.126127	0.0415452	0.0143746	0.00372922	0.00591513
0.528	0.0706268	-0.0262413	-0.138359	-0.100364	-0.107821	-0.0477199	-0.125313	0.0462623	0.015039	0.00268854	0.00602439
0.529	0.0718041	-0.0250368	-0.135872	-0.0992109	-0.107225	-0.0468393	-0.124207	0.0494476	0.0159459	0.000716247	0.00566226
0.53	0.072938	-0.0236175	-0.133408	-0.0982004	-0.106607	-0.0458458	-0.122807	0.0508366	0.0167706	-0.0019602	0.00486726
0.531	0.074099	-0.0219159	-0.131108	-0.0972038	-0.106246	-0.0447751	-0.12132	0.0504615	0.0173839	-0.00497788	0.00388805
0.532	0.0752055	-0.0198886	-0.128897	-0.09617	-0.106433	-0.043685	-0.119734	0.0486599	0.0177685	-0.00789483	0.00290449
0.533	0.0762806	-0.0176402	-0.126588	-0.095112	-0.10708	-0.0426158	-0.117799	0.0456164	0.0177558	-0.0104403	0.00217596
0.534	0.0774712	-0.0153197	-0.124157	-0.093998	-0.10799	-0.0417696	-0.115596	0.0412908	0.0173288	-0.0123172	0.00203343
0.535	0.0787271	-0.0129255	-0.121735	-0.092863	-0.109112	-0.0414059	-0.113464	0.0360232	0.0167506	-0.0132444	0.00255886
0.536	0.0798583	-0.0104007	-0.119488	-0.0918174	-0.110343	-0.0415067	-0.111603	0.030554	0.016199	-0.0132562	0.00359765
0.537	0.0808206	-0.00782792	-0.117554	-0.0909028	-0.111491	-0.0418236	-0.110211	0.0254864	0.0156078	-0.0125088	0.00496687
0.538	0.0816909	-0.00531723	-0.116039	-0.0901409	-0.112316	-0.0420111	-0.109482	0.0212528	0.014802	-0.011242	0.00639321
0.539	0.0825168	-0.00285894	-0.115041	-0.0895332	-0.112563	-0.0417948	-0.109407	0.0181501	0.0137214	-0.0100038	0.00754279
0.54	0.0833476	-0.000442434	-0.114499	-0.0889851	-0.112197	-0.0413837	-0.109928	0.0162744	0.0126213	-0.00931746	0.00824492
0.541	0.0842817	0.00180263	-0.11407	-0.0884029	-0.111342	-0.0412495	-0.11093	0.0160939	0.0118245	-0.00927749	0.00830514
0.542	0.0853583	0.00371187	-0.113302	-0.087681	-0.110049	-0.0414468	-0.112106	0.0186007	0.0113251	-0.00978142	0.00747986
0.543	0.0864801	0.00528371	-0.111988	-0.0865959	-0.108395	-0.0417114	-0.113323	0.0243085	0.0109919	-0.0101876	0.00586293
0.544	0.0875299	0.00665192	-0.110326	-0.0850175	-0.106562	-0.0419025	-0.114776	0.0328309	0.0108585	-0.00856338	0.00375921
0.545	0.0885084	0.00787599	-0.108663	-0.0831351	-0.104702	-0.0420134	-0.116517	0.0433113	0.0109006	-0.00320597	0.00144164
0.546	0.0895394	0.00889002	-0.107145	-0.0813185	-0.102989	-0.0421705	-0.118341	0.0544844	0.0109032	0.00546169	-0.00071064
0.547	0.0907243	0.00970806	-0.105668	-0.0799159	-0.101748	-0.0425753	-0.119973	0.0648888	0.0106687	0.0155779	-0.00234642
0.548	0.0920172	0.0104742	-0.104046	-0.0790707	-0.101199	-0.0431999	-0.121101	0.0733213	0.0100777	0.0250429	-0.00325145
0.549	0.0933306	0.0112804	-0.102113	-0.0786118	-0.101208	-0.0439336	-0.121496	0.0788945	0.00911719	0.032235	-0.00314189
0.55	0.0946069	0.0121438	-0.0997602	-0.0782369	-0.101459	-0.0448262	-0.121149	0.0812373	0.00788204	0.0364086	-0.00190261
0.551	0.0957429	0.0130681	-0.0970827	-0.0777493	-0.10166	-0.0457881	-0.120201	0.0806147	0.00634798	0.0372926	0.000143535
0.552	0.0966503	0.0140553	-0.0944542	-0.0771112	-0.101681	-0.0466257	-0.118831	0.0774784	0.00448938	0.035055	0.0025615
0.553	0.0973917	0.0151782	-0.0923052	-0.0764155	-0.101583	-0.0472774	-0.117107	0.0723844	0.00268218	0.0305604	0.00494718
0.554	0.0981016	0.0165385	-0.090846	-0.0757242	-0.101453	-0.0475581	-0.114954	0.0662651	0.00142723	0.0247292	0.00683889
0.555	0.0987913	0.0180934	-0.0899858	-0.0749196	-0.101326	-0.0472577	-0.1125	0.060015	0.000890301	0.0181115	0.00791033
0.556	0.0993538	0.0196546	-0.0894415	-0.0739213	-0.101229	-0.0465712	-0.11013	0.0541137	0.00113063	0.0113002	0.00798131
0.557	0.0996552	0.0210405	-0.0889332	-0.0728134	-0.101047	-0.0458144	-0.108053	0.0488769	0.00213585	0.00489449	0.00697102
0.558	0.0996412	0.0222197	-0.0883001	-0.0716405	-0.100484	-0.0450419	-0.106268	0.0443748	0.00366221	-0.000796432	0.00514963
0.559	0.0995216	0.0233166	-0.0875143	-0.0704991	-0.099359	-0.0443028	-0.104838	0.040429	0.00555562	-0.00562779	0.00295643
0.56	0.0997056	0.0244307	-0.0866624	-0.0695772	-0.0977205	-0.0436878	-0.103866	0.0370678	0.00770346	-0.00966671	0.00059693
0.561	0.100543	0.0255723	-0.0858966	-0.0688524	-0.0957172	-0.0431537	-0.103377	0.0344016	0.00972912	-0.0132021	-0.0017055
0.562	0.102171	0.0267461	-0.0853373	-0.0681956	-0.0936566	-0.0427421	-0.103341	0.0322245	0.0112725	-0.0163846	-0.0036091
0.563	0.104427	0.0279378	-0.0849931	-0.067611	-0.0918722	-0.042575	-0.103702	0.0301754	0.0122266	-0.0191685	-0.00508194
0.564	0.106946	0.0290988	-0.0848329	-0.0671339	-0.0903647	-0.042596	-0.104346	0.0279778	0.0125843	-0.0214447	-0.00636355
0.565	0.109375	0.0302579	-0.0848964	-0.0668129	-0.0889437	-0.0427567	-0.105123	0.025563	0.0123441	-0.0229311	-0.00764762
0.566	0.111377	0.0315257	-0.0852582	-0.0667122	-0.0875774	-0.0431786	-0.105881	0.0232456	0.0114284	-0.0232908	-0.00898123
0.567	0.112656	0.0328873	-0.0859683	-0.0667276	-0.0864612	-0.0439034	-0.10647	0.0214254	0.00968349	-0.0225216	-0.0101303
0.568	0.11305	0.0341801	-0.0869863	-0.0666364	-0.0858688	-0.0448182	-0.106841	0.0202204	0.00716837	-0.0207774	-0.0107987
0.569	0.112527	0.0352929	-0.088126	-0.0663327	-0.0858	-0.0457313	-0.107005	0.0197674	0.00425395	-0.0180683	-0.0111034
0.57	0.111229	0.036191	-0.0891492	-0.0657518	-0.0859386	-0.0463829	-0.106907	0.020259	0.00137341	-0.0146664	-0.011322
0.571	0.109409	0.0368492	-0.0897554	-0.064814	-0.0860407	-0.0466773	-0.106505	0.0215517	-0.000992256	-0.0111177	-0.0114354
0.572	0.107267	0.0372971	-0.0895717	-0.0636426	-0.0860013	-0.0466971	-0.105815	0.0233722	-0.00229152	-0.00768543	-0.0113157
0.573	0.105115	0.0375831	-0.0884997	-0.062436	-0.0856	-0.0463862	-0.104904	0.0255872	-0.00229655	-0.00453306	-0.0109437
0.574	0.103322	0.0377187	-0.0867532	-0.0611918	-0.0846187	-0.0456631	-0.10398	0.0279881	-0.001234	-0.00200438	-0.0103224
0.575	0.102043	0.037812	-0.0844262	-0.059932	-0.083131	-0.0445643	-0.103137	0.0303757	0.000529449	-0.000375038	-0.00951243
0.576	0.101345	0.0379831	-0.081457	-0.0587952	-0.081323	-0.0429378	-0.102235	0.0327494	0.00260058	0.000147751	-0.00858291
0.577	0.10128	0.0381301	-0.0779722	-0.0577913	-0.0792978	-0.0405458	-0.101333	0.035	0.00468805	-0.00037969	-0.00742735
0.578	0.101738	0.0381839	-0.0743922	-0.0569383	-0.0771531	-0.037594	-0.100545	0.0368422	0.00666378	-0.00138222	-0.00599465
0.579	0.102466	0.0383258	-0.0711844	-0.0564151	-0.0748849	-0.034668	-0.099608	0.0382101	0.00829965	-0.00232626	-0.00435775
0.58	0.103226	0.0387552	-0.0686364	-0.0563213	-0.0725012	-0.0322729	-0.0982804	0.0392265	0.00941941	-0.00295078	-0.00240309
0.581	0.103867	0.0395369	-0.0668456	-0.0565657	-0.0702914	-0.0306726	-0.0966057	0.0399141	0.0103384	-0.00286492	-4.76e-05
0.582	0.104298	0.0406397	-0.0657588	-0.0569932	-0.068485	-0.0298894	-0.0945967	0.0402949	0.0116584	-0.00186982	0.00250754
0.583	0.104541	0.0419746	-0.0652117	-0.0574903	-0.0670036	-0.0297953	-0.0923222	0.040461	0.0137591	-0.000389296	0.00511361
0.584	0.104698	0.0434135	-0.0649496	-0.0580716	-0.065818	-0.0303237	-0.0900809	0.0405421	0.0166256	0.00109262	0.00774223
0.585	0.104786	0.0448555	-0.0646978	-0.0587535	-0.0649484	-0.0314021	-0.0881051	0.0407347	0.0198257	0.00247952	0.0102368
0.586	0.104778	0.0461504	-0.0643069	-0.0592973	-0.0642463	-0.0327488	-0.0864361	0.041006	0.0227444	0.00389647	0.0125001
0.587	0.104679	0.0471195	-0.063792	-0.0594234	-0.0635676	-0.0340468	-0.0850121	0.0410112	0.0249988	0.00564999	0.0146437
0.588	0.104452	0.0478627	-0.0631599	-0.059088	-0.0627335	-0.035115	-0.0837187	0.0406138	0.0264336	0.00789841	0.0167672
0.589	0.104073	0.048605	-0.0622788	-0.0583415	-0.0614456	-0.0359298	-0.0826	0.0398933	0.0269991	0.0103302	0.0189067
0.59	0.103641	0.0493495	-0.0610218	-0.0572834	-0.0596989	-0.0367152	-0.0818515	0.0388525	0.0268946	0.0126653	0.0209999
0.591	0.103287	0.0500212	-0.0594268	-0.0560849	-0.0578626	-0.0376097	-0.0814858	0.0376489	0.0264336	0.0148944	0.0228055
0.592	0.103097	0.0506112	-0.0576964	-0.0548027	-0.0561804	-0.0383263	-0.0814109	0.0364567	0.0257712	0.0168424	0.0242214
0.593	0.103124	0.0511418	-0.0560484	-0.0534524	-0.0546008	-0.0385759	-0.0816697	0.0351879	0.0250807	0.0181872	0.0254197
0.594	0.103314	0.0516944	-0.0545963	-0.0522748	-0.052883	-0.0383504	-0.082175	0.0338576	0.0245182	0.0187633	0.0264345
0.595	0.103526	0.0523666	-0.0534113	-0.0515167	-0.0506693	-0.0376888	-0.0826397	0.0326459	0.023956	0.0184695	0.0271264
0.596	0.103707	0.0531861	-0.0524639	-0.051152	-0.047784	-0.0367452	-0.0829391	0.0315907	0.0233204	0.017365	0.0274856
0.597	0.103849	0.0541656	-0.0515472	-0.0510376	-0.0444205	-0.0358128	-0.0830958	0.0307632	0.0227559	0.0158117	0.0275213
0.598	0.103877	0.0553304	-0.0504872	-0.0510366	-0.0408905	-0.0349163	-0.082979	0.0303748	0.0222355	0.014158	0.0271925
0.599	0.103785	0.0565608	-0.0493347	-0.0510166	-0.0375011	-0.0338966	-0.0823515	0.0304211	0.0216811	0.0126705	0.026656
0.6	0.103601	0.0575969	-0.048241	-0.050936	-0.0346857	-0.0328309	-0.0811081	0.0307145	0.021205	0.0116435	0.0261796
0.601	0.10327	0.05831	-0.047256	-0.0508788	-0.0328179	-0.0318912	-0.0793784	0.0311632	0.0207936	0.011247	0.02592
0.602	0.102825	0.0587805	-0.0463775	-0.0509653	-0.0320196	-0.0311588	-0.0775066	0.0316834	0.0203225	0.0115215	0.025904
0.603	0.102441	0.0591652	-0.0456583	-0.0512972	-0.0323442	-0.0306513	-0.0757757	0.0322307	0.0198919	0.0123623	0.025914
0.604	0.102187	0.0596277	-0.0451254	-0.0518732	-0.0338202	-0.0302525	-0.0742058	0.0328577	0.0196264	0.0133001	0.0257197
0.605	0.102027	0.0602525	-0.0447362	-0.0525317	-0.0364283	-0.0299099	-0.0728482	0.0334193	0.0195574	0.0137479	0.0254855
0.606	0.102006	0.0609741	-0.044417	-0.0531162	-0.0402591	-0.0297805	-0.0719398	0.0336679	0.0198469	0.0136003	0.0253909
0.607	0.102205	0.0616689	-0.0440711	-0.0535324	-0.0452584	-0.0298815	-0.0715599	0.0335896	0.0205554	0.0132245	0.0253373
0.608	0.10259	0.0622549	-0.0436957	-0.0536582	-0.0509063	-0.0300041	-0.0715514	0.0331303	0.0215387	0.0129846	0.0253828
0.609	0.103017	0.0626713	-0.0433832	-0.0534538	-0.0565451	-0.0300129	-0.0717404	0.0321536	0.0227935	0.0129547	0.0256913
0.61	0.1033	0.0628432	-0.0431667	-0.0530507	-0.0616771	-0.0299176	-0.0719444	0.0308565	0.024252	0.0128288	0.0261819
0.611	0.103299	0.062701	-0.0431372	-0.0526547	-0.0660199	-0.029828	-0.0720186	0.0295278	0.0255956	0.0122977	0.0267906
0.612	0.103019	0.0622716	-0.0435327	-0.0524683	-0.0695841	-0.029948	-0.0719058	0.0281457	0.0267016	0.0115922	0.0275084
0.613	0.102559	0.0617508	-0.0444872	-0.0525682	-0.0723939	-0.0303956	-0.0715699	0.0265424	0.0276074	0.0110636	0.0281001
0.614	0.101972	0.0613413	-0.0459044	-0.052858	-0.0742698	-0.0311052	-0.0710555	0.0245993	0.0281835	0.0106875	0.0283919
0.615	0.101315	0.0610344	-0.0475861	-0.0532654	-0.0751286	-0.0320123	-0.0704222	0.0223297	0.0283739	0.0105575	0.0284986
0.616	0.100705	0.0607413	-0.0493929	-0.0537744	-0.0750394	-0.0328061	-0.0695813	0.0201546	0.0282812	0.0108998	0.0288472
0.617	0.100189	0.0605602	-0.0513394	-0.0542922	-0.0740213	-0.0327714	-0.0685291	0.0188526	0.0279448	0.0114827	0.0303034
0.618	0.0997262	0.0607241	-0.0534546	-0.0547228	-0.0721851	-0.0316736	-0.0675161	0.0188541	0.0274708	0.0119117	0.0334404
0.619	0.099261	0.061318	-0.0555378	-0.0550244	-0.0696948	-0.0300698	-0.0666826	0.019998	0.0270041	0.0121169	0.0377725
0.62	0.0987527	0.062138	-0.0572465	-0.0550742	-0.0666394	-0.0285132	-0.0659175	0.0218888	0.0263955	0.0121419	0.0423591
0.621	0.0981826	0.0628306	-0.0583797	-0.0547439	-0.0633537	-0.0272761	-0.0651517	0.0241237	0.0254658	0.0120964	0.0464777
0.622	0.09754	0.0631201	-0.058915	-0.054131	-0.0603629	-0.0265186	-0.0644402	0.0265748	0.0243692	0.0122413	0.0494715
0.623	0.0968218	0.0630183	-0.0589677	-0.0534579	-0.0579652	-0.0262788	-0.0638547	0.0292467	0.0233795	0.0127714	0.0508001
0.624	0.0960533	0.0627932	-0.0587628	-0.0528925	-0.056446	-0.0265127	-0.0634704	0.0317991	0.0228284	0.0137739	0.0503215
0.625	0.0953758	0.0625761	-0.0584445	-0.052556	-0.0561991	-0.0270279	-0.063276	0.0338161	0.02306	0.0151089	0.0481042
0.626	0.0950009	0.0622192	-0.0580569	-0.0524271	-0.0571944	-0.0273992	-0.0631446	0.0351863	0.0240912	0.0162309	0.0443595
0.627	0.0950127	0.0616306	-0.0577084	-0.0523843	-0.0590516	-0.0273	-0.0630477	0.0358841	0.0257254	0.0166678	0.0395888
0.628	0.0953003	0.060961	-0.0575036	-0.0524191	-0.0615165	-0.0267923	-0.0630009	0.0359332	0.0277795	0.0164205	0.034289
0.629	0.0955614	0.0604244	-0.0574947	-0.0525341	-0.0644069	-0.0261089	-0.062859	0.0355101	0.0299004	0.0155948	0.0288414
0.63	0.0954296	0.0601623	-0.0578087	-0.0527651	-0.0676861	-0.0254205	-0.0624983	0.0346234	0.0316871	0.0142666	0.0238313
0.631	0.0948066	0.0602337	-0.0585402	-0.0533612	-0.0714314	-0.0248197	-0.0618206	0.0331429	0.0329224	0.0127261	0.0198932
0.632	0.0938906	0.060535	-0.0595699	-0.0544106	-0.075261	-0.0243026	-0.0606104	0.0311432	0.0333886	0.0113029	0.0172967
0.633	0.0928219	0.0608438	-0.0606561	-0.0556124	-0.0784287	-0.0239048	-0.0589344	0.0286622	0.0329449	0.0103003	0.0159981
0.634	0.0915876	0.061015	-0.0616003	-0.0567102	-0.0804976	-0.0237971	-0.0572582	0.0257059	0.0318631	0.0101121	0.0158258
0.635	0.0901617	0.0610268	-0.0623717	-0.0576337	-0.0812986	-0.0240153	-0.0559533	0.0226686	0.0305912	0.0108829	0.0166106
0.636	0.0886372	0.0608923	-0.0630555	-0.0583106	-0.0806356	-0.0244556	-0.0551754	0.0200221	0.0293893	0.0124024	0.0183332
0.637	0.0873004	0.0606784	-0.0636299	-0.0586905	-0.0783881	-0.0251334	-0.0549471	0.0180302	0.0284327	0.014463	0.0209426
0.638	0.0863797	0.0605545	-0.0640185	-0.0587186	-0.0745102	-0.0259243	-0.0551119	0.0169791	0.0277447	0.0167966	0.0241687
0.639	0.085851	0.0606123	-0.0642004	-0.0583168	-0.069014	-0.0263777	-0.0555406	0.0169448	0.0271145	0.0189188	0.0277432
0.64	0.0856166	0.0607348	-0.064055	-0.05754	-0.0622589	-0.0261117	-0.0561968	0.0176762	0.0264994	0.0204696	0.03146
0.641	0.0856088	0.0608222	-0.0634366	-0.0565009	-0.0549397	-0.0250445	-0.0569781	0.0189455	0.0260551	0.0212102	0.0350411
0.642	0.0857684	0.0609089	-0.0624084	-0.0551935	-0.047716	-0.0233431	-0.0578025	0.0204372	0.0257335	0.0208543	0.0383073
0.643	0.0860527	0.0610336	-0.0611127	-0.0536845	-0.0411895	-0.0213652	-0.0585941	0.0216641	0.0254188	0.0194389	0.0411299
0.644	0.0864043	0.0612864	-0.0595843	-0.0522712	-0.0358779	-0.0194838	-0.0591508	0.0224038	0.0251701	0.0172813	0.0431283
0.645	0.0867164	0.0618065	-0.0578604	-0.0512423	-0.0319939	-0.017954	-0.05931	0.0227008	0.0250565	0.0146153	0.044006
0.646	0.0868786	0.0626125	-0.0560346	-0.0507271	-0.0295669	-0.0169512	-0.0591053	0.0225284	0.0251618	0.0117216	0.0438763
0.647	0.0868818	0.0635981	-0.0541573	-0.0507298	-0.0284648	-0.0165358	-0.0586047	0.0219913	0.0256095	0.00892851	0.0429751
0.648	0.0868164	0.0646152	-0.0522837	-0.0510756	-0.0282836	-0.0166075	-0.0578145	0.0217235	0.0263791	0.00646192	0.0416822
0.649	0.0867929	0.06555	-0.0504935	-0.0515251	-0.0287657	-0.0170827	-0.0568103	0.0226898	0.0273359	0.0046066	0.0405592
0.65	0.0868872	0.0663496	-0.0488409	-0.0519742	-0.0300503	-0.0178993	-0.0557435	0.0252477	0.0282646	0.00362236	0.0398527
0.651	0.0871179	0.0669414	-0.0474372	-0.0523538	-0.0323576	-0.0188155	-0.0547536	0.0286714	0.0288965	0.00346423	0.0395029
0.652	0.0874675	0.0672197	-0.0464256	-0.0525832	-0.0359716	-0.0196789	-0.0539386	0.0318468	0.0291692	0.00406706	0.0396225
0.653	0.0878287	0.0672271	-0.045864	-0.0527452	-0.0412082	-0.0206319	-0.0532721	0.0340856	0.0292024	0.00546793	0.0404343
0.654	0.0879793	0.0672142	-0.0457208	-0.0529335	-0.0480466	-0.0217531	-0.0527429	0.0352473	0.028988	0.0072733	0.0419781
0.655	0.0877818	0.067314	-0.045926	-0.0530239	-0.0562417	-0.0229948	-0.0526081	0.0353829	0.0285415	0.00890786	0.0439485
0.656	0.0873622	0.0674246	-0.0464351	-0.0528691	-0.0655189	-0.0242646	-0.0531394	0.034588	0.02809	0.0102463	0.0457475
0.657	0.086997	0.067532	-0.0471789	-0.0524236	-0.075508	-0.0252476	-0.0543311	0.0329726	0.0277101	0.0112493	0.0469868
0.658	0.0868381	0.0677449	-0.0480053	-0.051676	-0.085987	-0.0256515	-0.0560044	0.0305107	0.027368	0.0117703	0.0477351
0.659	0.0868279	0.068054	-0.0488178	-0.0507482	-0.0968834	-0.0255042	-0.057835	0.027352	0.0272551	0.0117656	0.0480892
0.66	0.0869048	0.0683604	-0.0495888	-0.0498248	-0.107809	-0.0248502	-0.0594205	0.0240833	0.027471	0.0110282	0.0480235
0.661	0.0871036	0.0686489	-0.0501842	-0.0489252	-0.11813	-0.0237264	-0.0605136	0.0211701	0.0278642	0.00940884	0.0476933
0.662	0.08747	0.0689774	-0.0504318	-0.0480219	-0.127419	-0.0223823	-0.060972	0.0186544	0.0283284	0.00727242	0.0471987
0.663	0.0879785	0.0693194	-0.0503068	-0.0471366	-0.135396	-0.020967	-0.0605992	0.0165449	0.0287204	0.00505791	0.0462943
0.664	0.0884151	0.0695587	-0.0498272	-0.0463246	-0.141831	-0.0195469	-0.0592785	0.0148589	0.0287651	0.00304596	0.0448187
0.665	0.0884362	0.0696898	-0.0489136	-0.0457722	-0.14671	-0.0184938	-0.0570987	0.0135395	0.0282661	0.00167109	0.0428672
0.666	0.0878668	0.0698764	-0.0476516	-0.0455376	-0.150116	-0.0181317	-0.0542809	0.0126558	0.0270891	0.00123971	0.0406371
0.667	0.0868725	0.0702417	-0.0464657	-0.0453636	-0.152137	-0.0184266	-0.0512196	0.0122913	0.0252299	0.00166109	0.0385439
0.668	0.0858066	0.0707228	-0.0456985	-0.0451126	-0.153002	-0.0193829	-0.0485016	0.012462	0.0230794	0.00289144	0.0369461
0.669	0.0849245	0.0711893	-0.0452687	-0.0448719	-0.152827	-0.0210025	-0.0465815	0.0133293	0.0211049	0.00495081	0.0357829
0.67	0.0842913	0.071622	-0.044898	-0.0445479	-0.151277	-0.0229565	-0.0455901	0.0148725	0.0195289	0.0074984	0.0349573
0.671	0.0838564	0.0720976	-0.0444574	-0.0439656	-0.148012	-0.0248427	-0.0455096	0.016614	0.0186115	0.0100249	0.034576
0.672	0.083506	0.0725993	-0.044042	-0.0431652	-0.143062	-0.0263831	-0.0461284	0.0182842	0.0184641	0.0120818	0.0346555
0.673	0.0831469	0.0729777	-0.0438377	-0.0422308	-0.13643	-0.0273631	-0.0469668	0.0200798	0.0187245	0.0132355	0.0351631
0.674	0.0827905	0.0731241	-0.0439419	-0.0411323	-0.128003	-0.0277398	-0.0475987	0.0220801	0.0190797	0.0133652	0.0361298
0.675	0.0824841	0.0730493	-0.0442555	-0.0398423	-0.118019	-0.0275003	-0.0479103	0.0240688	0.0195269	0.0126227	0.0374475
0.676	0.0822421	0.0728051	-0.0446274	-0.03845	-0.107163	-0.0264639	-0.0480542	0.0257607	0.020053	0.0110281	0.0390395
0.677	0.082095	0.072433	-0.0450824	-0.0371891	-0.0963511	-0.0246737	-0.048175	0.0269937	0.0206981	0.0087585	0.0410093
0.678	0.0820755	0.0720178	-0.0457046	-0.0363174	-0.0865426	-0.022576	-0.0480328	0.0278626	0.0215266	0.00618473	0.0431971
0.679	0.0821805	0.0717567	-0.0464461	-0.0358733	-0.0785702	-0.0206721	-0.0472171	0.0284615	0.0223958	0.00331679	0.0452715
0.68	0.0824408	0.0718618	-0.0472076	-0.0357155	-0.0730946	-0.019435	-0.0458594	0.0286008	0.0231932	0.00013321	0.0472339
0.681	0.0829383	0.0723681	-0.0478902	-0.035804	-0.0704717	-0.0191326	-0.0444775	0.0281756	0.023909	-0.00292508	0.0490917
0.682	0.0837097	0.0731179	-0.0484433	-0.036145	-0.0705195	-0.0195376	-0.043397	0.0273859	0.0243774	-0.00533683	0.0505722
0.683	0.0846092	0.0738773	-0.0488816	-0.0366408	-0.0727354	-0.0202543	-0.0428494	0.0263687	0.0244737	-0.00679687	0.0515139
0.684	0.0853106	0.0744252	-0.0491666	-0.0372034	-0.0766969	-0.0210837	-0.0429726	0.0252361	0.024375	-0.00714126	0.0518925
0.685	0.085588	0.0746786	-0.0493656	-0.0377122	-0.0819037	-0.0219889	-0.0436027	0.024245	0.0243076	-0.00639933	0.0516737
0.686	0.0854678	0.0747377	-0.0497283	-0.0380026	-0.0876754	-0.0230336	-0.0444993	0.0234249	0.0243228	-0.00462477	0.0510504
0.687	0.0851239	0.074736	-0.050368	-0.0380685	-0.0936394	-0.0241901	-0.0455039	0.0226474	0.0243624	-0.00168682	0.0503973
0.688	0.0847868	0.0747787	-0.0511784	-0.0379653	-0.0997583	-0.0251729	-0.0463278	0.0220669	0.0242992	0.00221486	0.0500177
0.689	0.0845857	0.0749664	-0.0519542	-0.0376995	-0.105871	-0.0257679	-0.0465497	0.0218889	0.0240288	0.00634753	0.0503036
0.69	0.0843841	0.0752956	-0.0523991	-0.037369	-0.111645	-0.0260475	-0.0457333	0.0221764	0.0235782	0.0100984	0.0515479
0.691	0.0839106	0.0756196	-0.0522237	-0.0370867	-0.116648	-0.0260085	-0.0437095	0.0229969	0.0229704	0.0130984	0.0534089
0.692	0.0830835	0.075846	-0.0513027	-0.0368832	-0.12045	-0.0255197	-0.0411332	0.0242807	0.0222347	0.0150205	0.0552609
0.693	0.0821292	0.0760703	-0.0496911	-0.0368574	-0.122863	-0.0246238	-0.0391333	0.0259576	0.021609	0.015773	0.0566998
0.694	0.0814363	0.0763973	-0.0476263	-0.037142	-0.123866	-0.0233933	-0.0383344	0.0281271	0.0212936	0.0154102	0.057448
0.695	0.0812957	0.0768246	-0.0454802	-0.0377223	-0.123622	-0.0218371	-0.0387336	0.0304968	0.0211796	0.0140571	0.0574112
0.696	0.0816545	0.0773016	-0.0435556	-0.0384632	-0.122717	-0.0202059	-0.0400626	0.0323231	0.0211144	0.0121814	0.0566498
0.697	0.0821689	0.0777578	-0.042021	-0.0392282	-0.121712	-0.0188326	-0.0419375	0.0331123	0.021008	0.0102418	0.0551561
0.698	0.0826119	0.0781403	-0.0410008	-0.0399237	-0.120752	-0.0178396	-0.0440112	0.0326343	0.0207468	0.00828866	0.0530668
0.699	0.0830949	0.078426	-0.0405525	-0.0405006	-0.120095	-0.0173857	-0.0459871	0.0307015	0.0203526	0.00641794	0.0507679
0.7	0.0837674	0.0786237	-0.0406399	-0.0409389	-0.120253	-0.0176556	-0.0474313	0.0275433	0.0198381	0.00487179	0.0486017
0.701	0.084476	0.0787712	-0.0411695	-0.0411775	-0.121545	-0.0186439	-0.0480106	0.0238564	0.0190391	0.00373421	0.0468861
0.702	0.0849072	0.0788698	-0.0419791	-0.0411758	-0.124189	-0.0202721	-0.0477876	0.0203195	0.0180282	0.00317995	0.0459133
0.703	0.084966	0.0789097	-0.0429147	-0.0410147	-0.128252	-0.0222528	-0.0469753	0.0174183	0.0171805	0.00342823	0.0456023
0.704	0.0848094	0.0789887	-0.0438781	-0.0407625	-0.133219	-0.0239739	-0.0458518	0.0154186	0.0167228	0.00435989	0.0456104
0.705	0.0846311	0.0792367	-0.0446392	-0.0404256	-0.138283	-0.0250163	-0.0447992	0.0142797	0.0167779	0.00577199	0.0457192
0.706	0.084582	0.079613	-0.0448788	-0.0400267	-0.14291	-0.025409	-0.0439471	0.0138497	0.0174887	0.0074701	0.0457781
0.707	0.0847369	0.0799629	-0.0445691	-0.0395328	-0.146728	-0.0252938	-0.0431541	0.013962	0.0187413	0.00894426	0.0457307
0.708	0.0850236	0.0802253	-0.0439686	-0.038943	-0.149495	-0.0247988	-0.0424365	0.0143824	0.0203324	0.00965698	0.0456696
0.709	0.0852794	0.0804214	-0.0432828	-0.0384239	-0.151323	-0.0240106	-0.0418982	0.0150455	0.0222413	0.00942687	0.0455106
0.71	0.085427	0.0805264	-0.0426003	-0.0380075	-0.152453	-0.0228964	-0.0414609	0.0159905	0.0243696	0.00824182	0.0451705
0.711	0.0855141	0.080511	-0.0419615	-0.0374889	-0.153161	-0.0215861	-0.0410278	0.0169049	0.0264461	0.00622575	0.0448624
0.712	0.0855463	0.0804389	-0.041397	-0.0368253	-0.153866	-0.0204826	-0.0405642	0.0173581	0.0281188	0.00376951	0.0446363
0.713	0.0853967	0.0804125	-0.0409481	-0.036221	-0.154826	-0.0198385	-0.0400369	0.0173166	0.0289948	0.00120472	0.0443281
0.714	0.0849591	0.080477	-0.0406353	-0.0358609	-0.156056	-0.0196415	-0.0394936	0.0168672	0.0289521	-0.00136208	0.0440683
0.715	0.0842742	0.0806575	-0.0405398	-0.0358149	-0.157603	-0.0198591	-0.0389224	0.0159738	0.0282646	-0.00373686	0.0440513
0.716	0.083446	0.0809216	-0.0408621	-0.0360313	-0.159463	-0.0203832	-0.0382273	0.0147678	0.0281373	-0.00564692	0.0441709
0.717	0.0825683	0.0810723	-0.0417192	-0.0363199	-0.161495	-0.0209961	-0.0375816	0.013537	0.030996	-0.00684367	0.0443717
0.718	0.0817513	0.080987	-0.0429373	-0.0365192	-0.163596	-0.0215776	-0.0372819	0.0125476	0.0377917	-0.00703064	0.0447082
0.719	0.0811161	0.0807782	-0.0441512	-0.0364987	-0.165559	-0.0221398	-0.0373205	0.0120055	0.046282	-0.00618924	0.0451058
0.72	0.0806768	0.0805274	-0.0450394	-0.0360087	-0.166931	-0.0227189	-0.0376395	0.0119725	0.0535415	-0.00474094	0.0456772
0.721	0.08031	0.0801896	-0.0454395	-0.0349837	-0.167426	-0.0232634	-0.0383071	0.0125355	0.057989	-0.00307337	0.0466746
0.722	0.0799712	0.0797236	-0.0453547	-0.0336397	-0.167086	-0.0235901	-0.0391897	0.0138763	0.0591368	-0.00133178	0.0479302
0.723	0.0797404	0.0790948	-0.0448725	-0.032103	-0.165975	-0.0237193	-0.0400414	0.0158411	0.0571361	0.000396814	0.0491134
0.724	0.0796472	0.0782587	-0.0440711	-0.0304582	-0.164259	-0.0240363	-0.0406975	0.0178825	0.0526895	0.0020647	0.0501378
0.725	0.0796762	0.0773165	-0.0429981	-0.0288546	-0.162279	-0.0247355	-0.0409483	0.0196111	0.0466664	0.0039926	0.0509218
0.726	0.0798096	0.0765611	-0.0417037	-0.027348	-0.160243	-0.0255313	-0.0407349	0.0210504	0.0397523	0.0069988	0.051392
0.727	0.0799947	0.0761888	-0.0402262	-0.0260821	-0.158193	-0.0260485	-0.0402559	0.0223592	0.0326922	0.0114624	0.0515259
0.728	0.080148	0.0761355	-0.0384973	-0.0253704	-0.15628	-0.0260242	-0.0395383	0.0235535	0.0262502	0.0166057	0.0510953
0.729	0.0801778	0.0762514	-0.0364772	-0.0252846	-0.155049	-0.0253442	-0.0384608	0.0244046	0.0209139	0.0211175	0.0499616
0.73	0.0800661	0.0764906	-0.0343525	-0.025651	-0.155685	-0.024266	-0.0371429	0.0245588	0.017017	0.0240479	0.0484636
0.731	0.0798987	0.0768763	-0.0323709	-0.026345	-0.159553	-0.0231567	-0.0356781	0.0239035	0.0147036	0.0251179	0.0470501
0.732	0.079718	0.0773297	-0.0306982	-0.0271696	-0.167324	-0.0220458	-0.033941	0.0225806	0.0136247	0.0244384	0.0460256
0.733	0.0794453	0.077671	-0.0294862	-0.02788	-0.178693	-0.0209897	-0.0320561	0.020742	0.0132242	0.0279873	0.0455751
0.734	0.0790429	0.0778042	-0.0288075	-0.0284188	-0.192551	-0.0202793	-0.0303714	0.0187763	0.013187	0.0502854	0.0455492
0.735	0.078606	0.0777847	-0.028519	-0.0288176	-0.207193	-0.0199431	-0.0290507	0.0173629	0.0133193	0.0971665	0.0456568
0.736	0.0782776	0.0777402	-0.028281	-0.0290809	-0.220718	-0.0198173	-0.0281553	0.0168843	0.0134923	0.155807	0.0458885
0.737	0.0781453	0.0778394	-0.0277783	-0.0291935	-0.23156	-0.0198701	-0.0276446	0.0172629	0.0137532	0.209209	0.046317
0.738	0.0781843	0.0782092	-0.0269757	-0.0290544	-0.238711	-0.0200265	-0.0272314	0.0183112	0.0141982	0.246772	0.0468706
0.739	0.0783389	0.0788057	-0.0259686	-0.0285953	-0.241763	-0.0202841	-0.0266193	0.0197887	0.0149427	0.264007	0.0474963
0.74	0.0785715	0.0794688	-0.0247113	-0.0279554	-0.240897	-0.0207771	-0.0258318	0.0214681	0.0161863	0.276048	0.0480899
0.741	0.0788055	0.0799525	-0.0231646	-0.0273183	-0.236701	-0.0213456	-0.0252408	0.023214	0.0180167	0.327957	0.0484795
0.742	0.079024	0.0799246	-0.0214712	-0.0267737	-0.230109	-0.0216373	-0.0254154	0.0249196	0.0202629	0.453386	0.0487029
0.743	0.0793037	0.0792448	-0.0198103	-0.0264102	-0.222273	-0.021536	-0.0267321	0.0266749	0.0225892	0.634282	0.0488602
0.744	0.07956	0.0781081	-0.018186	-0.0262406	-0.214194	-0.0210389	-0.028952	0.0285507	0.0245936	0.821448	0.0488879
0.745	0.079553	0.0767912	-0.0164928	-0.0261201	-0.206583	-0.0200875	-0.0314941	0.0300853	0.0260147	0.968561	0.0488358
0.746	0.0791759	0.0755258	-0.0147046	-0.026027	-0.199851	-0.0187267	-0.0337955	0.0305194	0.0268218	1.04673	0.048768
0.747	0.0784787	0.0745497	-0.0128545	-0.0261403	-0.193951	-0.017089	-0.0353033	0.0293803	0.0269595	1.04654	0.0483789
0.748	0.0775987	0.0739695	-0.0110077	-0.0264618	-0.188599	-0.0153169	-0.03581	0.0265777	0.0263706	0.973345	0.0473738
0.749	0.0767282	0.0736837	-0.00930011	-0.02678	-0.183668	-0.0136226	-0.0356054	0.0223118	0.0251659	0.841757	0.0457685
0.75	0.0760029	0.073635	-0.00788417	-0.0269751	-0.179147	-0.0121111	-0.035029	0.0171923	0.0233456	0.670829	0.0436676
0.751	0.0754849	0.0739428	-0.00684919	-0.0270622	-0.175045	-0.0107637	-0.0343289	0.0120579	0.0207875	0.480457	0.0413823
0.752	0.0751842	0.074682	-0.00613411	-0.0271282	-0.171418	-0.00978628	-0.033777	0.00756454	0.0177034	0.288977	0.039363
0.753	0.0750354	0.0757654	-0.00556545	-0.0272575	-0.168262	-0.00945691	-0.0335402	0.00414167	0.0145774	0.111407	0.0378491
0.754	0.0750239	0.0770272	-0.00509235	-0.0273839	-0.165457	-0.0098032	-0.0337738	0.00198249	0.0118265	-0.0412492	0.03702
0.755	0.075238	0.0782594	-0.00472644	-0.027392	-0.16289	-0.010785	-0.0346836	0.00106948	0.00979651	-0.162158	0.0370161
0.756	0.0756783	0.0792232	-0.00432766	-0.0272733	-0.160407	-0.0122616	-0.0360528	0.00140529	0.00861019	-0.249004	0.0376385
0.757	0.0762601	0.0797206	-0.00380192	-0.0270095	-0.157789	-0.0138207	-0.0373472	0.00280042	0.00804732	-0.303496	0.0385203
0.758	0.0769722	0.0797788	-0.00319492	-0.0265321	-0.154992	-0.0151293	-0.0383701	0.00469462	0.00795664	-0.329773	0.0393219
0.759	0.0778078	0.0796437	-0.00254863	-0.0258625	-0.15222	-0.0160505	-0.0391437	0.00667861	0.00843243	-0.333076	0.0395671
0.76	0.0786165	0.0794679	-0.00199427	-0.0250576	-0.149702	-0.0164169	-0.0396	0.00865372	0.009467	-0.319004	0.0388724
0.761	0.0791629	0.0792165	-0.00173871	-0.0240624	-0.147618	-0.0162647	-0.0396681	0.0104047	0.0108277	-0.292824	0.0373426
0.762	0.0793444	0.0788613	-0.00186509	-0.0228413	-0.146072	-0.015827	-0.0392247	0.0115963	0.0121196	-0.259285	0.0353478
0.763	0.0792511	0.0784316	-0.00235213	-0.0215226	-0.144989	-0.0150363	-0.0381652	0.0119795	0.012894	-0.222722	0.0332602
0.764	0.0789848	0.0779186	-0.00323199	-0.0203252	-0.144346	-0.0137455	-0.0366522	0.0114336	0.0131006	-0.186606	0.0315012
0.765	0.0785813	0.0773003	-0.00454811	-0.0194104	-0.144316	-0.0122653	-0.0348576	0.0101428	0.0131389	-0.153316	0.0303396
0.766	0.078165	0.0766229	-0.00620477	-0.0187512	-0.1449	-0.0110978	-0.0327786	0.00859026	0.0131987	-0.124556	0.0297688
0.767	0.0779832	0.0759753	-0.00802977	-0.0181847	-0.145824	-0.0105949	-0.030578	0.00723363	0.013185	-0.101372	0.0297151
0.768	0.0781366	0.0754307	-0.00981113	-0.0176359	-0.146906	-0.0108951	-0.0285575	0.00643217	0.0131682	-0.0836841	0.0299935
0.769	0.0785117	0.0750747	-0.0112455	-0.017153	-0.147982	-0.0117505	-0.0269296	0.00644263	0.0132861	-0.070435	0.0303211
0.77	0.078958	0.0750463	-0.0120523	-0.0166566	-0.148762	-0.012805	-0.0259511	0.00723286	0.0134841	-0.0602911	0.0306996
0.771	0.079294	0.0754833	-0.0120296	-0.0159334	-0.149127	-0.0138882	-0.0258451	0.00868449	0.0136329	-0.0521823	0.0312766
0.772	0.0793789	0.0763638	-0.0110829	-0.0149873	-0.149094	-0.0148139	-0.0265044	0.0107705	0.0136781	-0.0456929	0.0319207
0.773	0.0791545	0.0774225	-0.00933421	-0.0140865	-0.148676	-0.0155272	-0.0276686	0.0131469	0.0135959	-0.040951	0.0323939
0.774	0.0785852	0.0783848	-0.00703026	-0.0134697	-0.148063	-0.0162655	-0.0291853	0.01523	0.0133968	-0.0380397	0.0324673
0.775	0.0778005	0.0792096	-0.00447125	-0.0131071	-0.147451	-0.017098	-0.0309019	0.0167965	0.0131841	-0.0368125	0.031942
0.776	0.0771009	0.0799558	-0.00216538	-0.0128091	-0.146867	-0.0177118	-0.0326445	0.0178384	0.0131414	-0.0370856	0.0310525
0.777	0.0765958	0.0806183	-0.000686678	-0.0126395	-0.146398	-0.0178818	-0.0342508	0.0182245	0.0135143	-0.0386632	0.030296
0.778	0.0760225	0.0811463	-0.000215372	-0.0128917	-0.146236	-0.0176699	-0.035516	0.0179237	0.0144906	-0.0413357	0.0298259
0.779	0.0751269	0.0814668	-0.000368035	-0.0136483	-0.146562	-0.0171651	-0.036429	0.0170377	0.0160591	-0.0448524	0.0295114
0.78	0.0740043	0.0815577	-0.000476406	-0.0147458	-0.147474	-0.0165363	-0.0372538	0.0156275	0.0181416	-0.0487071	0.0291624
0.781	0.0729541	0.0815064	-8.13e-05	-0.0160627	-0.148789	-0.0160153	-0.0379944	0.0138513	0.0206272	-0.0521672	0.0285388
0.782	0.0722496	0.081461	0.000759336	-0.0174854	-0.150036	-0.0156936	-0.0382854	0.0119611	0.0231492	-0.0545978	0.0275683
0.783	0.0719362	0.0815447	0.00160654	-0.0188101	-0.150824	-0.0156926	-0.0380082	0.0100617	0.025316	-0.0556587	0.0263702
0.784	0.0717928	0.0817707	0.00195516	-0.0198888	-0.15098	-0.0161446	-0.0373417	0.00822458	0.0269984	-0.0554396	0.0250626
0.785	0.071653	0.0820069	0.00139613	-0.0206767	-0.150331	-0.0169672	-0.0363454	0.00661056	0.0281131	-0.0543543	0.0239678
0.786	0.0715268	0.0820988	-0.000285783	-0.0212337	-0.148714	-0.0180105	-0.0350043	0.00522026	0.0285779	-0.0526059	0.0235529
0.787	0.071476	0.0820295	-0.0030406	-0.0216874	-0.146191	-0.0191151	-0.0333619	0.00388996	0.0284037	-0.0500966	0.0239254
0.788	0.0716649	0.0818539	-0.0066997	-0.0220167	-0.143012	-0.0200035	-0.0315904	0.00258482	0.0276387	-0.0469166	0.0250166
0.789	0.0722587	0.08159	-0.01107	-0.022024	-0.139547	-0.0204996	-0.0300686	0.00154949	0.0264241	-0.0434072	0.0268228
0.79	0.0731476	0.0812435	-0.0158885	-0.0215402	-0.136152	-0.0206546	-0.0292473	0.0012119	0.0249867	-0.0399238	0.0289307
0.791	0.0740319	0.0808216	-0.0209317	-0.0205859	-0.132909	-0.0204973	-0.0294829	0.00176891	0.0235917	-0.0368398	0.0308868
0.792	0.074773	0.0803444	-0.0260444	-0.0194794	-0.129689	-0.0200521	-0.0307947	0.00288162	0.022562	-0.034427	0.0329786
0.793	0.0754616	0.0798523	-0.031038	-0.018676	-0.126347	-0.0194732	-0.032656	0.00401794	0.0220365	-0.0326846	0.0354586
0.794	0.0761813	0.0793765	-0.0357975	-0.0183625	-0.122704	-0.0188152	-0.0343331	0.00486522	0.0218009	-0.0315734	0.0379414
0.795	0.0768711	0.0789793	-0.040327	-0.0184394	-0.118675	-0.0180702	-0.0355436	0.0052432	0.0215561	-0.031172	0.040057
0.796	0.0773533	0.0787478	-0.0444437	-0.0188471	-0.114543	-0.0173959	-0.0360981	0.00514369	0.0211018	-0.0314283	0.0415498
0.797	0.0774729	0.0786931	-0.0477042	-0.019548	-0.110826	-0.0169008	-0.0352514	0.00481731	0.020278	-0.0321242	0.0421856
0.798	0.0772081	0.0788242	-0.0497942	-0.0203445	-0.107811	-0.0166004	-0.0327786	0.00430263	0.019039	-0.0329943	0.04204
0.799	0.0766127	0.0792065	-0.0507038	-0.0209745	-0.105485	-0.0166388	-0.029553	0.00334365	0.0174671	-0.0336728	0.0411367
0.8	0.0758661	0.0798247	-0.0505621	-0.0212731	-0.103717	-0.0170645	-0.0263592	0.00195276	0.0156359	-0.0338865	0.0392641
0.801	0.0753006	0.0805728	-0.0495163	-0.0212201	-0.102305	-0.017664	-0.0235998	0.000466993	0.0136397	-0.033548	0.0366131
0.802	0.0750525	0.0813448	-0.0477206	-0.0208678	-0.101075	-0.0182791	-0.0216605	-0.000768929	0.0116602	-0.0325414	0.0336951
0.803	0.0749354	0.0820631	-0.0453519	-0.02023	-0.0999326	-0.0188535	-0.02074	-0.001536	0.00985216	-0.0309148	0.0307864
0.804	0.0748059	0.0827584	-0.0424592	-0.0193266	-0.0989029	-0.0193309	-0.0209867	-0.00183325	0.00832806	-0.0290774	0.0280853
0.805	0.0746513	0.0835409	-0.0388112	-0.018321	-0.0981678	-0.0198126	-0.0225678	-0.00177568	0.00728132	-0.0274063	0.0258095
0.806	0.0744276	0.0843915	-0.0341205	-0.0174	-0.097827	-0.0203814	-0.0252189	-0.0014478	0.00683017	-0.0260449	0.0239706
0.807	0.0741222	0.0851344	-0.0282841	-0.0165547	-0.0976853	-0.020846	-0.0283759	-0.00107892	0.00694555	-0.0251145	0.0225807
0.808	0.0738645	0.0856106	-0.0213781	-0.0156975	-0.0974084	-0.0210156	-0.0316452	-0.0010008	0.00768065	-0.0246062	0.0216991
0.809	0.0738597	0.0857974	-0.013692	-0.0149031	-0.0966513	-0.0208612	-0.0347229	-0.00120121	0.00906287	-0.0243927	0.0210768
0.81	0.0741607	0.0858097	-0.00561524	-0.0143502	-0.0951906	-0.0203706	-0.037313	-0.00132501	0.0109284	-0.024534	0.0204535
0.811	0.0746368	0.0857761	0.00265255	-0.01414	-0.0931693	-0.0196308	-0.0392267	-0.00115744	0.0130043	-0.0250808	0.0198716
0.812	0.0751948	0.0857093	0.0110202	-0.0143001	-0.0908338	-0.0187278	-0.0403995	-0.000727109	0.0148323	-0.0258602	0.0192361
0.813	0.0757796	0.0855297	0.0191912	-0.0147801	-0.0881385	-0.017562	-0.040973	-1.71e-05	0.0159974	-0.0266492	0.0182966
0.814	0.0762561	0.0851886	0.026675	-0.0154512	-0.0848822	-0.0162941	-0.0411933	0.00119701	0.0165884	-0.0271916	0.0170678
0.815	0.0764859	0.0847487	0.0329266	-0.0161702	-0.0810239	-0.0154776	-0.0410422	0.00320061	0.0168416	-0.0273164	0.0157468
0.816	0.0763752	0.0843334	0.0373079	-0.0167861	-0.0769746	-0.0154018	-0.040301	0.0058967	0.0166421	-0.0271594	0.0145074
0.817	0.0759079	0.0839999	0.0392238	-0.0172219	-0.0736376	-0.0158863	-0.0390242	0.00866429	0.0158207	-0.0268457	0.0134486
0.818	0.0752486	0.0837015	0.0384057	-0.0174766	-0.0719327	-0.0166709	-0.0375235	0.0109293	0.0144346	-0.0262264	0.01252
0.819	0.0746259	0.0833306	0.0348765	-0.0175091	-0.0724124	-0.0175511	-0.0360369	0.0124939	0.0126999	-0.0251783	0.0117541
0.82	0.0741007	0.0828152	0.028852	-0.01736	-0.0753051	-0.0183182	-0.0347165	0.0132259	0.0110184	-0.0237142	0.0114337
0.821	0.0736085	0.0822368	0.0207385	-0.017282	-0.0803992	-0.0187665	-0.0336697	0.0130507	0.00984592	-0.0219236	0.0116933
0.822	0.073133	0.0817606	0.0109818	-0.0174901	-0.0869197	-0.018664	-0.03293	0.0121102	0.00933943	-0.0201905	0.0123617
0.823	0.0726521	0.081442	3.06e-05	-0.0179781	-0.0940002	-0.017997	-0.0325759	0.0105717	0.00936405	-0.0190105	0.0132477
0.824	0.0720921	0.0811714	-0.0115464	-0.0187083	-0.10111	-0.017101	-0.032683	0.00864044	0.00972416	-0.0185516	0.0141626
0.825	0.0714782	0.0807902	-0.0229941	-0.0196515	-0.108019	-0.0161544	-0.0331789	0.00664896	0.0101735	-0.0188023	0.0149182
0.826	0.0709373	0.0802528	-0.033349	-0.0206791	-0.114911	-0.0150814	-0.0340052	0.00478414	0.0105549	-0.0196585	0.0155476
0.827	0.0705657	0.0796054	-0.0417655	-0.021728	-0.122418	-0.0139502	-0.0350306	0.00309773	0.010966	-0.0207972	0.0161151
0.828	0.0704004	0.0788764	-0.048041	-0.0228776	-0.131101	-0.0128644	-0.0358464	0.00178	0.0114783	-0.0219415	0.0164285
0.829	0.0704482	0.0780867	-0.0526056	-0.0241596	-0.14103	-0.0118389	-0.0362076	0.000964752	0.011979	-0.023094	0.0162908
0.83	0.0706754	0.0772962	-0.056053	-0.0255211	-0.151867	-0.0110378	-0.0362177	0.000578338	0.0124496	-0.0243685	0.0156353
0.831	0.0710014	0.0766769	-0.0589693	-0.026851	-0.16297	-0.0107028	-0.0359604	0.000551192	0.0129141	-0.0256688	0.0144597
0.832	0.0713626	0.076452	-0.0620393	-0.0279124	-0.173461	-0.0109998	-0.0356107	0.000746812	0.0132534	-0.0266185	0.0130633
0.833	0.0717525	0.0767033	-0.0658753	-0.0285094	-0.182611	-0.0121242	-0.0355004	0.000888163	0.0134242	-0.026832	0.0119556
0.834	0.072188	0.077408	-0.0707918	-0.0287492	-0.190098	-0.0140721	-0.0356617	0.000842956	0.0134333	-0.0261874	0.0113166
0.835	0.0726693	0.0784914	-0.0767666	-0.028853	-0.195921	-0.0163713	-0.0358461	0.000629767	0.0132359	-0.0248022	0.0110575
0.836	0.0731273	0.0797932	-0.0832889	-0.0288992	-0.200199	-0.0184633	-0.0359842	0.000201145	0.0129364	-0.0228559	0.0111889
0.837	0.0734072	0.0811833	-0.0893265	-0.0290101	-0.203032	-0.020067	-0.0361678	-0.000432873	0.0126923	-0.0206277	0.0117311
0.838	0.0733555	0.0824965	-0.0938752	-0.029424	-0.204652	-0.0211209	-0.0363908	-0.00113964	0.0125783	-0.0185183	0.0127007
0.839	0.07294	0.0834515	-0.0965367	-0.0302505	-0.205647	-0.0217634	-0.0365547	-0.00175962	0.0127263	-0.0167959	0.0140967
0.84	0.072313	0.0839801	-0.0975316	-0.0313365	-0.20671	-0.0221903	-0.0364857	-0.00199109	0.0131861	-0.015469	0.0157067
0.841	0.0717391	0.0843458	-0.0974596	-0.0323337	-0.208304	-0.0223807	-0.0360579	-0.00157285	0.0138319	-0.0144274	0.0173296
0.842	0.0713392	0.0847801	-0.0968662	-0.0330271	-0.210741	-0.0221812	-0.0354065	-0.000699487	0.0146786	-0.0134506	0.0188299
0.843	0.0709899	0.085346	-0.095731	-0.0336004	-0.214112	-0.0214528	-0.0347078	0.00014481	0.0157944	-0.0123684	0.0198368
0.844	0.0706196	0.086087	-0.0934629	-0.0342614	-0.218129	-0.0201029	-0.0339526	0.000476293	0.0169947	-0.0114474	0.0201037
0.845	0.0703122	0.0869742	-0.0894469	-0.0348792	-0.222337	-0.0183336	-0.0331871	-0.00012621	0.0180646	-0.0111611	0.0199069
0.846	0.0700483	0.0879372	-0.0836181	-0.0353093	-0.226299	-0.0156303	-0.032573	-0.00171739	0.018864	-0.0116754	0.019597
0.847	0.0696961	0.0889763	-0.0766722	-0.035601	-0.229608	-0.0100208	-0.0322346	-0.00394573	0.0190999	-0.0128256	0.019265
0.848	0.0692459	0.0900166	-0.0699296	-0.0358439	-0.232017	-0.00124357	-0.0323416	-0.00645342	0.0185468	-0.0143157	0.0189403
0.849	0.0688567	0.0909643	-0.0650159	-0.0360942	-0.233551	0.00775481	-0.033003	-0.00885827	0.0172886	-0.0159154	0.0186267
0.85	0.068673	0.0918045	-0.0633462	-0.0362789	-0.234404	0.0141491	-0.0340058	-0.0106898	0.0154279	-0.0175868	0.0182433
0.851	0.0687222	0.092395	-0.0655629	-0.0362825	-0.234761	0.0171925	-0.0349902	-0.0117695	0.013077	-0.019276	0.0178023
0.852	0.0689681	0.0925656	-0.0714328	-0.0361749	-0.234664	0.0175409	-0.0357223	-0.0121414	0.0105529	-0.0207651	0.017428
0.853	0.0693369	0.0923523	-0.0802769	-0.0361365	-0.233898	0.0160425	-0.0360576	-0.0116867	0.00812103	-0.0218791	0.0172525
0.854	0.0697753	0.0918789	-0.0914676	-0.0362842	-0.232136	0.0129521	-0.0360132	-0.0102539	0.00596271	-0.0225606	0.0174786
0.855	0.0702983	0.0912831	-0.104627	-0.0366702	-0.229305	0.00826346	-0.0357867	-0.0078682	0.00438705	-0.0228361	0.0181768
0.856	0.0709272	0.0907129	-0.119405	-0.0372517	-0.225537	0.0023231	-0.0354394	-0.00474905	0.00352757	-0.0228976	0.019113
0.857	0.0716076	0.0902309	-0.13513	-0.0377999	-0.221061	-0.00422672	-0.0350024	-0.00141694	0.00318302	-0.0230407	0.0201086
0.858	0.0722064	0.0898143	-0.150645	-0.0380777	-0.216382	-0.0108989	-0.0346584	0.0015163	0.00319967	-0.023471	0.0211116
0.859	0.0726798	0.0894667	-0.164514	-0.0380409	-0.212112	-0.0172408	-0.0343782	0.00383273	0.00361648	-0.0242125	0.0219074
0.86	0.073106	0.0892366	-0.175748	-0.0377274	-0.208706	-0.022588	-0.0340371	0.00555659	0.0045272	-0.0251042	0.022421
0.861	0.0734422	0.0890545	-0.18423	-0.0372169	-0.206515	-0.0264309	-0.0337844	0.00656345	0.00591247	-0.0259753	0.0228785
0.862	0.073548	0.0887593	-0.19048	-0.0366418	-0.205694	-0.0285861	-0.0337449	0.00671642	0.00748131	-0.0269354	0.023279
0.863	0.0734474	0.0883132	-0.195498	-0.0361315	-0.20611	-0.0290672	-0.033865	0.00593607	0.00882576	-0.0282409	0.0234249
0.864	0.0732683	0.0877895	-0.200514	-0.0358835	-0.207473	-0.0283099	-0.0341326	0.00420958	0.00966877	-0.0298078	0.0232824
0.865	0.0730381	0.0872499	-0.206465	-0.0360546	-0.20939	-0.0271	-0.0345409	0.00185645	0.00983713	-0.0312573	0.0228611
0.866	0.0727245	0.0867862	-0.213735	-0.0364793	-0.211391	-0.0260404	-0.0349951	-0.000577994	0.00929988	-0.0323113	0.0222649
0.867	0.0723659	0.0865805	-0.222176	-0.0369001	-0.213143	-0.025508	-0.0353357	-0.00264388	0.00829208	-0.0327213	0.0217419
0.868	0.0720079	0.0867701	-0.231306	-0.0373295	-0.214495	-0.0256595	-0.0354115	-0.00401133	0.00710316	-0.0322257	0.0214003
0.869	0.0716057	0.087252	-0.240551	-0.0377556	-0.215323	-0.0261575	-0.0353126	-0.00454141	0.00657415	-0.0307708	0.0212811
0.87	0.0711137	0.0877695	-0.249234	-0.0379929	-0.215653	-0.0264984	-0.035301	-0.00443432	0.00853056	-0.0284763	0.0214972
0.871	0.0705496	0.0881656	-0.256509	-0.0380326	-0.215776	-0.0264534	-0.0353163	-0.00404371	0.0135707	-0.0255909	0.0219956
0.872	0.0699974	0.0883049	-0.26163	-0.0379772	-0.216019	-0.025965	-0.0350603	-0.00362349	0.0197931	-0.0225483	0.0226026
0.873	0.0695757	0.088021	-0.2642	-0.0377808	-0.216723	-0.0251141	-0.0345571	-0.00337786	0.0250368	-0.0197192	0.0232596
0.874	0.0692475	0.0874036	-0.264037	-0.0373501	-0.218299	-0.0241049	-0.034112	-0.00340134	0.0283508	-0.0172563	0.0238288
0.875	0.0687998	0.0867592	-0.261048	-0.0366993	-0.220941	-0.0230536	-0.0339561	-0.00353756	0.0295414	-0.0152929	0.0240619
0.876	0.0681864	0.0862544	-0.255317	-0.0360432	-0.224561	-0.0220116	-0.0342586	-0.00353358	0.0288456	-0.0139335	0.0239625
0.877	0.0676371	0.0859081	-0.247211	-0.0357151	-0.2289	-0.021055	-0.0350553	-0.00319258	0.026741	-0.0131987	0.0237055
0.878	0.0672782	0.0857467	-0.237444	-0.0357891	-0.233478	-0.0202498	-0.0361065	-0.00250748	0.0235506	-0.0118765	0.0233961
0.879	0.0670157	0.0856705	-0.22701	-0.0360643	-0.237812	-0.0198064	-0.0371598	-0.00174354	0.0194709	-0.00679945	0.0231638
0.88	0.0667963	0.085484	-0.21682	-0.0365146	-0.241642	-0.0200384	-0.0380228	-0.00114408	0.0149465	0.00346326	0.023039
0.881	0.0666758	0.0852131	-0.207511	-0.0372657	-0.244685	-0.0209239	-0.03844	-0.000767539	0.0106409	0.0161477	0.0228679
0.882	0.0667804	0.0850664	-0.199615	-0.0382343	-0.246598	-0.0221692	-0.0383961	-0.00065321	0.00708826	0.027516	0.0226413
0.883	0.0671779	0.0851601	-0.193596	-0.039169	-0.247318	-0.0236105	-0.0382156	-0.000737627	0.00450196	0.035519	0.0224484
0.884	0.0677004	0.0854586	-0.189709	-0.0398232	-0.247091	-0.0251308	-0.0381049	-0.000744126	0.00279971	0.0395338	0.0221705
0.885	0.068045	0.0858863	-0.188026	-0.0400696	-0.246146	-0.0265809	-0.0380414	-0.000454625	0.00183589	0.039777	0.0217142
0.886	0.068004	0.0864201	-0.188511	-0.0400635	-0.244499	-0.027887	-0.0379897	0.000126458	0.0016478	0.0370289	0.0212566
0.887	0.0675896	0.0869949	-0.191001	-0.0401061	-0.24202	-0.0289289	-0.0379195	0.000955072	0.00224371	0.0321496	0.0210687
0.888	0.0669941	0.0874466	-0.195213	-0.0403245	-0.23864	-0.0295653	-0.037937	0.00194043	0.00360082	0.0257717	0.0214068
0.889	0.0664243	0.0877089	-0.200701	-0.0406687	-0.234517	-0.0298422	-0.0381123	0.0029201	0.00594585	0.0184934	0.0224466
0.89	0.066	0.0878396	-0.206806	-0.0410284	-0.229939	-0.0298743	-0.038066	0.00395187	0.00914173	0.0109412	0.0240892
0.891	0.0658121	0.0878325	-0.212791	-0.0412602	-0.225241	-0.0296437	-0.0374425	0.00524228	0.0124357	0.00365329	0.0260701
0.892	0.0659444	0.0876183	-0.217911	-0.0413297	-0.220853	-0.0291009	-0.0364515	0.00681431	0.0152896	-0.00294325	0.0281941
0.893	0.0663395	0.0871116	-0.221425	-0.0413751	-0.217118	-0.0282628	-0.0354503	0.008591	0.0176023	-0.0085947	0.030167
0.894	0.066775	0.0862333	-0.222775	-0.0415387	-0.214126	-0.0272199	-0.0346539	0.0104922	0.0194204	-0.0132695	0.0315779
0.895	0.0669801	0.0850301	-0.22175	-0.0418655	-0.211814	-0.0261719	-0.0342671	0.0123774	0.0208378	-0.0169815	0.0321847
0.896	0.0667708	0.0837354	-0.218457	-0.0424125	-0.20997	-0.0252684	-0.0342603	0.0141635	0.0218034	-0.0197226	0.0319162
0.897	0.0662204	0.0826411	-0.213246	-0.0433339	-0.208181	-0.024487	-0.0342566	0.015819	0.0220815	-0.0215634	0.0308732
0.898	0.0656078	0.0818897	-0.206689	-0.0447248	-0.206133	-0.0238879	-0.0339703	0.0171622	0.021581	-0.0225388	0.0293711
0.899	0.0651039	0.0814953	-0.199471	-0.046448	-0.203864	-0.0236103	-0.0334379	0.0179598	0.0204845	-0.0226764	0.0276447
0.9	0.0646785	0.0814999	-0.192301	-0.0481722	-0.201561	-0.0235179	-0.0328611	0.0181168	0.0190097	-0.0222042	0.0257711
0.901	0.0643037	0.0819203	-0.185945	-0.0494816	-0.1993	-0.0234121	-0.0325548	0.017562	0.0172727	-0.0213254	0.023899
0.902	0.0640515	0.082644	-0.180983	-0.0500735	-0.196994	-0.0233317	-0.0327053	0.0163294	0.0152706	-0.0199982	0.0222798
0.903	0.0639459	0.0834391	-0.177655	-0.0499473	-0.194437	-0.0232404	-0.0331213	0.0147011	0.0129178	-0.0182213	0.0212982
0.904	0.063901	0.0840952	-0.1761	-0.0493538	-0.191547	-0.0230264	-0.0336335	0.0129994	0.0102042	-0.0161994	0.0212249
0.905	0.0638271	0.0846107	-0.176427	-0.0486067	-0.188505	-0.022807	-0.0343042	0.0116298	0.00717678	-0.0142024	0.0217842
0.906	0.063586	0.0851324	-0.178611	-0.0477963	-0.185457	-0.0227721	-0.0352146	0.0110203	0.0038329	-0.0124759	0.0224947
0.907	0.0630476	0.0858322	-0.182524	-0.0467654	-0.182338	-0.022995	-0.0365906	0.0111737	0.000424142	-0.0110841	0.0231005
0.908	0.0623058	0.0868132	-0.187837	-0.0454657	-0.178992	-0.0234194	-0.0385983	0.0118077	-0.00243276	-0.00996332	0.0233435
0.909	0.0615882	0.087933	-0.193956	-0.0440115	-0.175201	-0.0237421	-0.0409173	0.0127262	-0.00434397	-0.00936085	0.022971
0.91	0.061055	0.0889197	-0.200199	-0.042544	-0.17076	-0.0235791	-0.0431448	0.01375	-0.0053677	-0.00965881	0.0219919
0.911	0.0607643	0.0896238	-0.205969	-0.0412999	-0.165733	-0.0229023	-0.0450751	0.0147056	-0.00564559	-0.0106959	0.0204672
0.912	0.0607358	0.0899911	-0.210852	-0.0405107	-0.160389	-0.0219	-0.0463838	0.0154948	-0.00527693	-0.0118972	0.0183833
0.913	0.0609896	0.0900039	-0.214648	-0.0402345	-0.154987	-0.0206249	-0.0467707	0.0159848	-0.0043512	-0.0128292	0.0160007
0.914	0.061485	0.0897371	-0.21714	-0.0404765	-0.149875	-0.0192083	-0.0462541	0.015964	-0.00297562	-0.0132943	0.0138673
0.915	0.0621528	0.0893816	-0.217933	-0.0411933	-0.145528	-0.0179494	-0.0449997	0.0152709	-0.00144008	-0.0133062	0.0124381
0.916	0.0629209	0.0891588	-0.216767	-0.0421596	-0.142363	-0.0170741	-0.0432389	0.0139263	-5.2e-05	-0.0130252	0.0119785
0.917	0.063561	0.0891553	-0.213736	-0.043096	-0.140633	-0.0167527	-0.0413517	0.0121859	0.00122694	-0.0125012	0.012491
0.918	0.0637694	0.0892806	-0.209184	-0.0437843	-0.140355	-0.0170232	-0.0396084	0.0104049	0.00252397	-0.0117247	0.0136016
0.919	0.0634822	0.0893299	-0.20365	-0.0440376	-0.141293	-0.0175355	-0.0381074	0.00875998	0.00374138	-0.0108755	0.0148867
0.92	0.0628532	0.0890073	-0.197709	-0.0437905	-0.143166	-0.0178447	-0.037014	0.00725421	0.00482815	-0.0102042	0.0161377
0.921	0.0620399	0.0881283	-0.191704	-0.0431628	-0.14577	-0.0178747	-0.0363975	0.0060863	0.00582709	-0.00986529	0.0172082
0.922	0.06114	0.0868081	-0.185755	-0.0422691	-0.148924	-0.0177953	-0.036197	0.00562408	0.00666841	-0.00995214	0.0180678
0.923	0.0601938	0.0852795	-0.179949	-0.0411127	-0.152399	-0.0178021	-0.036395	0.00598998	0.00729827	-0.0104438	0.0188934
0.924	0.0591883	0.0836669	-0.174418	-0.0397427	-0.155953	-0.0180428	-0.0367761	0.00710315	0.00777945	-0.0112375	0.0197129
0.925	0.058096	0.0820411	-0.169291	-0.0383381	-0.159385	-0.0184704	-0.0369191	0.00879406	0.0082207	-0.0122967	0.0203126
0.926	0.0569985	0.0805382	-0.164644	-0.0371423	-0.16252	-0.0189138	-0.0366287	0.0107114	0.0087858	-0.0134791	0.0205056
0.927	0.0560502	0.0793191	-0.160548	-0.0363653	-0.165116	-0.0192475	-0.0358217	0.0125084	0.00954318	-0.0144397	0.0200734
0.928	0.055313	0.0785036	-0.15707	-0.0360769	-0.166832	-0.019349	-0.0343171	0.0138606	0.0102162	-0.0150134	0.0188718
0.929	0.0548011	0.0781313	-0.154197	-0.0361961	-0.167425	-0.0191636	-0.0322027	0.0143656	0.0104062	-0.01541	0.0170556
0.93	0.0545701	0.0781866	-0.151784	-0.0366403	-0.166911	-0.018816	-0.0297932	0.0138562	0.00996154	-0.0158848	0.0147729
0.931	0.0546612	0.0786432	-0.14962	-0.0374039	-0.165378	-0.0184946	-0.0246527	0.0124993	0.0090711	-0.0164636	0.0122184
0.932	0.0550177	0.0793889	-0.147593	-0.0384306	-0.162847	-0.018385	-9.23e-05	0.0105699	0.00822621	-0.0169812	0.00994591
0.933	0.0555837	0.080297	-0.145703	-0.0395423	-0.159436	-0.0186263	0.0725829	0.00850977	0.00789002	-0.0172057	0.00846055
0.934	0.056425	0.0813269	-0.143889	-0.0405114	-0.155511	-0.0191768	0.198384	0.00694055	0.00820761	-0.0169706	0.00799261
0.935	0.0575751	0.0823764	-0.142055	-0.0411394	-0.151576	-0.0198677	0.34398	0.00633677	0.00910896	-0.0161289	0.00869709
0.936	0.058858	0.0832792	-0.140217	-0.0413632	-0.14798	-0.0205188	0.4681	0.00684585	0.0104166	-0.0145341	0.0104415
0.937	0.0599296	0.0839823	-0.138531	-0.0412431	-0.144725	-0.0208767	0.544823	0.00833641	0.011796	-0.0122983	0.0127051
0.938	0.0605363	0.0844981	-0.137134	-0.040775	-0.14169	-0.0207198	0.56467	0.010472	0.0129389	-0.00976335	0.0150849
0.939	0.0606954	0.0848239	-0.135895	-0.0399373	-0.138885	-0.0200843	0.530431	0.0128449	0.0138084	-0.00721773	0.0175537
0.94	0.0604947	0.0849913	-0.13445	-0.0388724	-0.136345	-0.0191317	0.452613	0.015151	0.0143205	-0.00495286	0.0201575
0.941	0.0599234	0.0850679	-0.132573	-0.0377929	-0.134065	-0.0179645	0.345419	0.0172101	0.0141934	-0.0033194	0.0227974
0.942	0.0590242	0.0851405	-0.130318	-0.0368534	-0.132157	-0.0167156	0.223784	0.0188342	0.0133997	-0.00243822	0.0251336
0.943	0.058003	0.0852581	-0.127848	-0.0361613	-0.130746	-0.0155508	0.101597	0.0198076	0.0122323	-0.00214498	0.0266838
0.944	0.0571165	0.0853602	-0.125267	-0.0357788	-0.129877	-0.0145928	-0.00986255	0.0198223	0.0109651	-0.00226132	0.0272283
0.945	0.0565075	0.0853481	-0.122611	-0.035739	-0.129537	-0.0139822	-0.103024	0.0185147	0.00970183	-0.0026566	0.0268469
0.946	0.0561399	0.0851995	-0.119926	-0.036022	-0.129556	-0.0138055	-0.173829	0.0157817	0.00842304	-0.00319975	0.0256309
0.947	0.0559411	0.0849319	-0.117278	-0.0365078	-0.129703	-0.0139657	-0.221209	0.0118609	0.00712426	-0.0037073	0.0237879
0.948	0.0559908	0.0845363	-0.114737	-0.0371088	-0.129902	-0.0143585	-0.24656	0.00732916	0.00589129	-0.00387896	0.0217144
0.949	0.0564077	0.08406	-0.112447	-0.0378228	-0.130178	-0.0149837	-0.252613	0.00308687	0.00478215	-0.0035815	0.0196342
0.95	0.0571033	0.0836241	-0.110521	-0.038543	-0.130496	-0.0157735	-0.242796	-0.000139171	0.00370747	-0.00289906	0.0175381
0.951	0.0578367	0.0832865	-0.108971	-0.039051	-0.130821	-0.016592	-0.221256	-0.00212785	0.00266585	-0.00160446	0.0154093
0.952	0.0584537	0.0830247	-0.107798	-0.0392216	-0.131104	-0.0173295	-0.192252	-0.00295234	0.00196051	0.000583864	0.0132113
0.953	0.0589662	0.0828446	-0.107018	-0.0390814	-0.131208	-0.0178732	-0.159548	-0.00290385	0.00186414	0.00327162	0.0110515
0.954	0.0594268	0.082846	-0.106718	-0.0387266	-0.131054	-0.0181953	-0.126434	-0.00241489	0.00229795	0.00572431	0.00941228
0.955	0.0598083	0.0831571	-0.106975	-0.0382899	-0.13068	-0.0183255	-0.0954604	-0.00172721	0.00293177	0.00745578	0.00873592
0.956	0.0600574	0.0837788	-0.10758	-0.0378482	-0.130102	-0.0182063	-0.0683151	-0.00083126	0.00348178	0.00818692	0.00904767
0.957	0.0601872	0.0846146	-0.108142	-0.0373427	-0.129307	-0.0178474	-0.0462675	0.000358417	0.00403921	0.00787232	0.0100692
0.958	0.0601625	0.085576	-0.108442	-0.0367439	-0.128272	-0.0173941	-0.030046	0.00194934	0.00493775	0.00686868	0.0113188
0.959	0.05989	0.0865103	-0.1085	-0.0361068	-0.126891	-0.0168252	-0.0194628	0.00392253	0.00628073	0.00566288	0.0124658
0.96	0.0594668	0.0872738	-0.108332	-0.035418	-0.12513	-0.0159921	-0.0137779	0.00596383	0.00791025	0.00453962	0.0135282
0.961	0.059137	0.0878767	-0.107839	-0.0346673	-0.123183	-0.0149739	-0.0120469	0.00769082	0.00953298	0.00359148	0.0143805
0.962	0.0590886	0.0883358	-0.10705	-0.0340154	-0.121346	-0.0139093	-0.01316	0.0089208	0.010646	0.00274054	0.0147172
0.963	0.0594289	0.0885949	-0.106159	-0.0336383	-0.119892	-0.0128145	-0.0161323	0.00949168	0.0108474	0.00188552	0.0146071
0.964	0.0600994	0.0886117	-0.105267	-0.0335494	-0.119093	-0.0118493	-0.0202088	0.00924142	0.010311	0.00106675	0.0143492
0.965	0.0608612	0.0882929	-0.104351	-0.0337341	-0.119068	-0.0112293	-0.0246042	0.00826676	0.00961046	0.000305022	0.014047
0.966	0.0615019	0.0875082	-0.103408	-0.0342762	-0.119629	-0.0109593	-0.0285933	0.00673572	0.00919648	-0.000456177	0.0136949
0.967	0.0619062	0.0862768	-0.102506	-0.0352335	-0.120481	-0.0109791	-0.0316934	0.00474113	0.00917639	-0.00121087	0.0131497
0.968	0.0619614	0.0848197	-0.101682	-0.0364072	-0.1214	-0.0112723	-0.0335369	0.00250017	0.0093221	-0.00188387	0.0121893
0.969	0.061598	0.0834365	-0.100875	-0.0374171	-0.122233	-0.0117865	-0.0340955	0.000324355	0.00930928	-0.00229399	0.0109804
0.97	0.0609029	0.0823386	-0.100004	-0.0379602	-0.122954	-0.0123895	-0.0337874	-0.00137585	0.00915688	-0.00210488	0.0100425
0.971	0.0601271	0.0815883	-0.0990759	-0.0378516	-0.12358	-0.0128668	-0.0329373	-0.00202275	0.00917793	-0.00109722	0.0106194
0.972	0.0595291	0.0811192	-0.0982118	-0.0370943	-0.124053	-0.0130399	-0.0317106	-0.00121071	0.00950035	0.00059383	0.0149017
0.973	0.0591735	0.0808396	-0.0976027	-0.0359427	-0.124351	-0.0128731	-0.0304153	0.000975678	0.00994103	0.00263212	0.0233786
0.974	0.058967	0.080781	-0.0974183	-0.0347153	-0.12446	-0.0123749	-0.0292799	0.00410778	0.0102361	0.00459704	0.0333739
0.975	0.0588002	0.0809652	-0.0977035	-0.0336462	-0.124294	-0.011558	-0.0283093	0.00768357	0.0102801	0.00609621	0.041661
0.976	0.0585765	0.0812781	-0.0983677	-0.0330664	-0.123857	-0.0105686	-0.0274472	0.0113117	0.0101936	0.00701902	0.0464321
0.977	0.058287	0.0816382	-0.0992558	-0.0334466	-0.123203	-0.0095935	-0.0265655	0.0148257	0.0101419	0.00741091	0.0471918
0.978	0.058031	0.0820315	-0.100286	-0.0348546	-0.122297	-0.00868628	-0.0255824	0.0181299	0.0101759	0.00835544	0.044307
0.979	0.0579109	0.0824224	-0.101479	-0.0367826	-0.121258	-0.00788363	-0.0246015	0.0406384	0.0103363	0.0128434	0.0385345
0.98	0.0579877	0.0827647	-0.102808	-0.0387125	-0.120382	-0.00729822	-0.0236228	0.136782	0.010613	0.0225454	0.0308334
0.981	0.0582619	0.0830323	-0.104259	-0.0404161	-0.119729	-0.00705551	-0.0224879	0.342741	0.0107754	0.0351628	0.0225033
0.982	0.0586454	0.0831822	-0.105932	-0.0418662	-0.119195	-0.0072223	-0.0211671	0.627102	0.0106496	0.0469596	0.0149456
0.983	0.0589939	0.0831187	-0.107855	-0.0431635	-0.118798	-0.00773815	-0.0196746	0.924217	0.0103216	0.0553307	0.00901761
0.984	0.0592124	0.0828177	-0.109945	-0.0443667	-0.118509	-0.00850818	-0.017987	1.17773	0.00986825	0.0591431	0.00491237
0.985	0.0592555	0.0824196	-0.11206	-0.0453295	-0.118263	-0.00958489	-0.016305	1.35179	0.00935413	0.0585415	0.00244917
0.986	0.0590293	0.0820992	-0.113947	-0.0458474	-0.118005	-0.0110074	-0.0149952	1.43092	0.00898145	0.0543373	0.00118302
0.987	0.0584628	0.0819462	-0.115316	-0.0458524	-0.117487	-0.0125398	-0.0142733	1.41604	0.00885473	0.0473498	0.000671293
0.988	0.0576803	0.0820005	-0.115945	-0.0453881	-0.116428	-0.0139212	-0.0142361	1.31948	0.00887754	0.0383599	0.000754809
0.989	0.0569765	0.0822727	-0.115754	-0.0445113	-0.114788	-0.0150972	-0.0148767	1.16039	0.00892619	0.0282321	0.00139592
0.99	0.0565505	0.0827067	-0.114813	-0.0431916	-0.112732	-0.0159764	-0.0160263	0.960938	0.00892287	0.0176852	0.00255843
0.991	0.0563737	0.0831893	-0.11325	-0.0414254	-0.110518	-0.0164597	-0.0176363	0.742893	0.00895511	0.00737326	0.00421073
0.992	0.0562981	0.0836054	-0.11117	-0.0395299	-0.1084	-0.0166067	-0.0197292	0.525294	0.00930023	-0.00190094	0.00606925
0.993	0.0561481	0.083908	-0.108756	-0.0378866	-0.106449	-0.0163692	-0.0220483	0.323245	0.0101221	-0.00963884	0.00770913
0.994	0.0558658	0.084132	-0.106407	-0.0365475	-0.104568	-0.0156386	-0.0242694	0.147343	0.0113101	-0.0158133	0.00906931
0.995	0.0556185	0.0843162	-0.104513	-0.0356226	-0.102728	-0.0145733	-0.0261557	0.00370198	0.0127026	-0.0204072	0.0102933
0.996	0.0556401	0.0844675	-0.103108	-0.0354537	-0.100914	-0.0134051	-0.0273982	-0.105536	0.0142018	-0.0233705	0.0112923
0.997	0.0561033	0.0846052	-0.101932	-0.0362057	-0.0989889	-0.0122428	-0.0278756	-0.181438	0.0156364	-0.0247389	0.0119194
0.998	0.0570665	0.0847901	-0.100686	-0.037847	-0.0968308	-0.0112149	-0.0277151	-0.227111	0.0167504	-0.0245079	0.0121575
0.999	0.0583605	0.0850253	-0.0992029	-0.0401771	-0.0944256	-0.010447	-0.0268821	-0.246636	0.017314	-0.022778	0.011956
1	0.0596433	0.085123	-0.0975213	-0.0426433	-0.091925	-0.0100663	-0.0253021	-0.244847	0.0171741	-0.0199702	0.0113114
1.001	0.0606161	0.0849331	-0.0957522	-0.0446212	-0.0896692	-0.0103666	-0.0232018	-0.227264	0.0162362	-0.0166371	0.0103443
1.002	0.0611761	0.0846257	-0.0938082	-0.0457876	-0.087873	-0.0115791	-0.0209759	-0.199573	0.0143876	-0.0111349	0.00900399
1.003	0.0613593	0.0844656	-0.0913535	-0.0459456	-0.0862688	-0.0134541	-0.0192832	-0.167091	0.0116157	0.00132957	0.0071971
1.004	0.061139	0.0846035	-0.0881245	-0.0449014	-0.0843044	-0.0153421	-0.0191505	-0.134129	0.00826858	0.0223117	0.00527045
1.005	0.0603907	0.0850945	-0.0841679	-0.0426124	-0.081555	-0.0166008	-0.0210277	-0.103293	0.00488614	0.0465961	0.00388661
1.006	0.0591257	0.0858574	-0.0797608	-0.0391329	-0.0777979	-0.0167336	-0.0241752	-0.0757864	0.00188671	0.0677262	0.00365609
1.007	0.0576592	0.0867835	-0.0752617	-0.0346148	-0.0730084	-0.0152966	-0.0274898	-0.0523443	-0.000323021	0.0820435	0.0051413
1.008	0.056416	0.0877568	-0.071074	-0.0294354	-0.067394	-0.0120435	-0.0299902	-0.0332105	-0.00126436	0.0885493	0.0086933
1.009	0.0556429	0.0886127	-0.0675118	-0.0240932	-0.0612991	-0.00728919	-0.0306222	-0.0180083	-0.00048469	0.087932	0.0139644
1.01	0.055326	0.0893446	-0.0645449	-0.019062	-0.0551241	-0.00189029	-0.0287228	-0.00630432	0.00235752	0.0816172	0.0199726
1.011	0.0552932	0.0901075	-0.0619315	-0.0147463	-0.0492544	0.00341883	-0.0244794	0.00235439	0.00711852	0.0713924	0.0256872
1.012	0.055334	0.090973	-0.0596334	-0.0114349	-0.0440233	0.0083986	-0.0186608	0.00870282	0.0129651	0.059113	0.03043
1.013	0.0552629	0.0917903	-0.0578111	-0.00929691	-0.0398354	0.0128062	-0.012171	0.013636	0.018958	0.046483	0.0341453
1.014	0.0550531	0.0922784	-0.0564909	-0.00843543	-0.0371097	0.0161993	-0.00561379	0.0179575	0.0246232	0.0349817	0.0372918
1.015	0.0547842	0.0922618	-0.055602	-0.00875325	-0.0360424	0.0183379	0.00069825	0.0220477	0.0297471	0.0256917	0.0403238
1.016	0.0544464	0.0917782	-0.0552167	-0.00974802	-0.0365908	0.0192176	0.00632678	0.0257684	0.0340592	0.0192724	0.043576
1.017	0.0540218	0.0910549	-0.0554475	-0.0108351	-0.0384942	0.018952	0.0108488	0.0288619	0.0373292	0.0160619	0.0473759
1.018	0.0535116	0.0903873	-0.056218	-0.0117801	-0.0411989	0.0178729	0.0141833	0.0312704	0.0395028	0.016085	0.0518765
1.019	0.0527846	0.0899073	-0.0573449	-0.0127105	-0.0441325	0.0164466	0.0162664	0.0331103	0.0407814	0.0191805	0.057082
1.02	0.0517137	0.0895346	-0.0586754	-0.0140547	-0.0471758	0.0150416	0.016882	0.0347214	0.0416033	0.0250465	0.0629894
1.021	0.0504058	0.0892018	-0.0599957	-0.0163413	-0.0505751	0.0139466	0.0160836	0.0365879	0.0424214	0.0329315	0.0694616
1.022	0.0490984	0.0889568	-0.0610485	-0.0199228	-0.0545636	0.0134538	0.0142234	0.0389785	0.0434728	0.0416188	0.0762031
1.023	0.047922	0.0887895	-0.0616975	-0.0249801	-0.0593371	0.0136304	0.0114793	0.0419285	0.0446582	0.0500631	0.0828013
1.024	0.0468598	0.0885289	-0.061987	-0.0317104	-0.0651379	0.0142149	0.00778918	0.0455713	0.0457315	0.0579362	0.0887701
1.025	0.0459306	0.0880216	-0.0620046	-0.040476	-0.0722205	0.0149256	0.00328488	0.0501804	0.0467734	0.0654272	0.0937198
1.026	0.0452881	0.0872753	-0.0617776	-0.0517267	-0.0808118	0.0155424	-0.00151657	0.0559079	0.0482722	0.0728466	0.0974545
1.027	0.0450239	0.0863694	-0.0613996	-0.0657928	-0.0910174	0.0156585	-0.00591546	0.0626101	0.0506757	0.0804003	0.099973
1.028	0.045053	0.0854588	-0.0610489	-0.0826318	-0.102764	0.0146347	-0.00933304	0.0697947	0.0540629	0.0878645	0.101336
1.029	0.0453085	0.0848323	-0.0608325	-0.101737	-0.115885	0.0118951	-0.0115107	0.0766396	0.0581762	0.0947079	0.101501
1.03	0.045903	0.0847602	-0.0607794	-0.122919	-0.130061	0.00736128	-0.0125567	0.0821622	0.0625447	0.100536	0.100384
1.031	0.0470584	0.0853536	-0.0609321	-0.147379	-0.144869	0.0012981	-0.0131997	0.0856243	0.0664946	0.105033	0.098136
1.032	0.0488605	0.0865722	-0.061319	-0.177343	-0.160945	-0.00627579	-0.0147677	0.0869191	0.0692589	0.107985	0.0953599
1.033	0.0511376	0.0882263	-0.0619405	-0.21437	-0.181095	-0.0154401	-0.0184634	0.0864772	0.0704333	0.109573	0.0927405
1.034	0.0536997	0.0899927	-0.0629132	-0.258023	-0.211354	-0.0259618	-0.0249421	0.0846723	0.0702995	0.110144	0.0903383
1.035	0.0565401	0.0915545	-0.0643917	-0.306265	-0.264752	-0.0376887	-0.0345327	0.080954	0.0693866	0.109783	0.087747
1.036	0.0596403	0.0927862	-0.066245	-0.359062	-0.363096	-0.0515528	-0.0473778	0.073428	0.0677291	0.108302	0.0847433
1.037	0.062784	0.0937699	-0.0682215	-0.420762	-0.529659	-0.0696262	-0.063197	0.0597876	0.0648899	0.105617	0.081227
1.038	0.0657551	0.0946153	-0.0702871	-0.49403	-0.773282	-0.0932177	-0.080992	0.0388234	0.0606436	0.10203	0.0769553
1.039	0.0684965	0.095317	-0.0724967	-0.573086	-1.07503	-0.121219	-0.0991986	0.0112326	0.0551842	0.0977928	0.071775
1.04	0.0709746	0.0958088	-0.0749272	-0.646125	-1.39211	-0.150636	-0.116256	-0.0204278	0.0486579	0.0926384	0.066002
1.041	0.0731387	0.0960244	-0.0777769	-0.70174	-1.67567	-0.178039	-0.130992	-0.0525913	0.0411271	0.0861747	0.0602361
1.042	0.0750128	0.0958905	-0.0813686	-0.73296	-1.88633	-0.200401	-0.142709	-0.0817936	0.0329206	0.0784009	0.0546558
1.043	0.0766572	0.0954185	-0.0861114	-0.737803	-2.00082	-0.215232	-0.15119	-0.105271	0.0244501	0.0697067	0.0489623
1.044	0.0780377	0.0947335	-0.0923088	-0.717565	-2.01222	-0.22087	-0.156621	-0.121271	0.0160044	0.0604811	0.0430217
1.045	0.0790509	0.0939616	-0.099967	-0.675253	-1.92727	-0.217093	-0.159476	-0.12931	0.00789253	0.0508695	0.036993
1.046	0.0796348	0.0931515	-0.108767	-0.614883	-1.76254	-0.205311	-0.160512	-0.130005	0.000540309	0.0410913	0.0309611
1.047	0.079712	0.0923197	-0.118099	-0.541145	-1.54026	-0.187877	-0.160721	-0.124635	-0.00559895	0.0317856	0.0249121
1.048	0.0791749	0.0916081	-0.127225	-0.459061	-1.28429	-0.167032	-0.161069	-0.114664	-0.0103015	0.0236179	0.0188962
1.049	0.0780431	0.0912696	-0.135578	-0.373448	-1.01694	-0.14424	-0.162012	-0.10136	-0.0137951	0.0165982	0.0129717
1.05	0.0765109	0.0914334	-0.142885	-0.288484	-0.75712	-0.120305	-0.163298	-0.0857285	-0.0166409	0.010378	0.00714342
1.051	0.0748378	0.0919673	-0.148976	-0.207733	-0.519735	-0.0959046	-0.164321	-0.0685278	-0.0191627	0.00509975	0.00145102
1.052	0.0732157	0.0925801	-0.153651	-0.134069	-0.315357	-0.0718116	-0.164365	-0.0502248	-0.0211118	0.00122259	-0.00387096
1.053	0.071726	0.0930734	-0.156822	-0.0693353	-0.149824	-0.0488187	-0.162553	-0.0311241	-0.0220628	-0.00118212	-0.00840276
1.054	0.0704175	0.0934278	-0.158536	-0.0144003	-0.024436	-0.0275625	-0.157942	-0.0113989	-0.0218023	-0.00224494	-0.0117859
1.055	0.0693295	0.0936284	-0.15884	0.0306058	0.0629162	-0.00833029	-0.149816	0.00886323	-0.0203308	-0.00192944	-0.013773
1.056	0.0684747	0.0935875	-0.157789	0.0662777	0.11648	0.00872547	-0.13804	0.0291661	-0.0178236	-0.000387187	-0.0140497
1.057	0.0678593	0.0932514	-0.155566	0.0937138	0.141864	0.0231706	-0.123166	0.0484741	-0.0145459	0.00186375	-0.0124145
1.058	0.0674465	0.0926316	-0.152342	0.114124	0.145386	0.0345694	-0.106214	0.0658486	-0.0106784	0.00437786	-0.00922927
1.059	0.0671399	0.091798	-0.148199	0.128858	0.133336	0.0429436	-0.0884544	0.0807184	-0.00628705	0.00703477	-0.00534591
1.06	0.0667518	0.0909281	-0.143314	0.13949	0.111428	0.048522	-0.0711035	0.0926466	-0.0015055	0.00974129	-0.00150158
1.061	0.065988	0.0902228	-0.137995	0.147385	0.0844779	0.0515112	-0.0549109	0.101333	0.00339476	0.0121864	0.00195686
1.062	0.0647051	0.0897388	-0.132547	0.153416	0.0563714	0.0522863	-0.0400817	0.106752	0.00815073	0.0140428	0.00479085
1.063	0.0631112	0.0893843	-0.127202	0.158119	0.0300169	0.05139	-0.0265562	0.10916	0.0125538	0.0153205	0.00682915
1.064	0.0615359	0.0890014	-0.122108	0.16186	0.00727404	0.0493388	-0.01433	0.109029	0.0164754	0.0164681	0.00827694
1.065	0.0601483	0.0884599	-0.117345	0.165063	-0.0108273	0.0466364	-0.00352368	0.106972	0.0198912	0.0180033	0.00969556
1.066	0.0589564	0.0877538	-0.112916	0.168284	-0.023875	0.0438085	0.00576152	0.103637	0.0226518	0.0201616	0.0117276
1.067	0.0579363	0.0869999	-0.108741	0.171924	-0.0319176	0.0412319	0.0136129	0.0996809	0.0245357	0.0230674	0.0148438
1.068	0.0570463	0.0864688	-0.104666	0.176099	-0.0353548	0.0390666	0.0203577	0.0957396	0.0258025	0.026925	0.0191645
1.069	0.0562412	0.0864712	-0.100576	0.18069	-0.0350177	0.0372854	0.0263104	0.0923036	0.0272274	0.0319135	0.0244731
1.07	0.0555562	0.0870602	-0.0964848	0.185358	-0.0320351	0.0357231	0.0315407	0.0897783	0.0294749	0.0381037	0.0304201
1.071	0.055087	0.0881303	-0.0924566	0.189641	-0.0273669	0.0343243	0.0361172	0.0886216	0.0327468	0.0454714	0.0367986
1.072	0.0549403	0.0896098	-0.0885413	0.193105	-0.0216375	0.0332101	0.0403685	0.0891263	0.0368478	0.0539107	0.0435547
1.073	0.0551438	0.0913009	-0.0847929	0.195399	-0.015496	0.0324142	0.044603	0.091231	0.0413565	0.0631098	0.050478
1.074	0.0556234	0.0928534	-0.0812969	0.196258	-0.00965531	0.0317859	0.0487118	0.0946312	0.0458336	0.0723398	0.0570889
1.075	0.0562766	0.0939896	-0.0781609	0.195558	-0.0045712	0.0311153	0.0522446	0.098856	0.0500457	0.0808175	0.0629103
1.076	0.0569328	0.0946767	-0.0755657	0.193303	-0.000409802	0.0302526	0.0548653	0.103298	0.0540761	0.0883449	0.067656
1.077	0.057349	0.0950858	-0.0737871	0.18959	0.00279055	0.0291422	0.056605	0.107273	0.058155	0.0949917	0.0711386
1.078	0.0573225	0.0953727	-0.0728842	0.184549	0.00486543	0.0277064	0.0575402	0.110207	0.0623443	0.100494	0.0732335
1.079	0.0568058	0.0955379	-0.0725517	0.178206	0.00559095	0.0258001	0.0576174	0.111947	0.0664284	0.104593	0.0739833
1.08	0.0559146	0.0954762	-0.0724285	0.170553	0.00512751	0.0233318	0.0570254	0.112763	0.0700644	0.107465	0.0735525
1.081	0.0548699	0.0951228	-0.0722972	0.161725	0.00391978	0.0202678	0.0562233	0.112862	0.0729535	0.109356	0.0722197
1.082	0.0539268	0.0945058	-0.0720647	0.151993	0.00219605	0.0165937	0.0555024	0.112032	0.0749262	0.110132	0.070537
1.083	0.0532365	0.0936527	-0.0717485	0.141676	2.49e-05	0.0123734	0.0548387	0.109942	0.0757966	0.109436	0.0691019
1.084	0.0528206	0.0925968	-0.0715206	0.131141	-0.00240969	0.00775682	0.0540205	0.106525	0.0753098	0.107253	0.0681733
1.085	0.052623	0.091463	-0.0715839	0.120696	-0.00496579	0.002988	0.0526389	0.101925	0.0734655	0.104039	0.0677019
1.086	0.0525701	0.0904281	-0.071895	0.110487	-0.00763997	-0.00155771	0.0502262	0.0964444	0.0694885	0.10024	0.0674815
1.087	0.0527229	0.089601	-0.0722129	0.100671	-0.0104152	-0.00554619	0.046588	0.0904706	0.0574793	0.0960307	0.0672887
1.088	0.0531934	0.0890156	-0.0723605	0.0914606	-0.0131972	-0.00893738	0.0418523	0.0842753	0.0256209	0.0915763	0.0669944
1.089	0.0539059	0.0886785	-0.0722926	0.0829195	-0.0157742	-0.0118448	0.0363815	0.0780026	-0.033649	0.087134	0.0664765
1.09	0.0546901	0.0885012	-0.072123	0.0750265	-0.0179204	-0.0142416	0.0306537	0.0718225	-0.115338	0.0827645	0.0655867
1.091	0.0554791	0.0883414	-0.0720957	0.0678073	-0.0196714	-0.0159829	0.0250794	0.0660153	-0.206513	0.0783225	0.0642393
1.092	0.0562922	0.0880511	-0.0723667	0.0611894	-0.021299	-0.0169805	0.0200191	0.0609288	-0.293798	0.0737694	0.0624521
1.093	0.0572025	0.0874429	-0.0729316	0.0548043	-0.0229415	-0.0174123	0.0157936	0.0567653	-0.366561	0.0691387	0.0604017
1.094	0.0583549	0.0864555	-0.0738203	0.047919	-0.0246027	-0.0179264	0.0125518	0.0534162	-0.41785	0.0643336	0.0582909
1.095	0.0598412	0.0851046	-0.075269	0.0393332	-0.0267347	-0.0196755	0.0102602	0.0505591	-0.444424	0.059201	0.0560449
1.096	0.0615604	0.0831501	-0.0777185	0.0272635	-0.0306431	-0.0244765	0.00871126	0.0476788	-0.446327	0.0536862	0.0533875
1.097	0.0633064	0.0800261	-0.0818729	0.0095056	-0.0383796	-0.0350363	0.00751282	0.0440026	-0.426164	0.047943	0.0500083
1.098	0.0648294	0.0749859	-0.0888993	-0.0161168	-0.0524637	-0.0543885	0.00626679	0.0385772	-0.388186	0.0421952	0.045268
1.099	0.0656886	0.0671287	-0.100397	-0.0511162	-0.0754795	-0.0847027	0.00460837	0.0301603	-0.337465	0.0363743	0.0379162
1.1	0.065213	0.0552631	-0.117987	-0.0957098	-0.10949	-0.126655	0.00193907	0.0168432	-0.279367	0.0301163	0.0261447
1.101	0.0626496	0.0381383	-0.142914	-0.148831	-0.155412	-0.179529	-0.00272907	-0.00386827	-0.219685	0.0228333	0.00760438
1.102	0.0572591	0.0150351	-0.175891	-0.208848	-0.21274	-0.241402	-0.0108252	-0.0342169	-0.165078	0.0133934	-0.0204075
1.103	0.0483754	-0.0140511	-0.216965	-0.274098	-0.279902	-0.309533	-0.0243394	-0.0754127	-0.122897	-0.000138392	-0.0601054
1.104	0.0356155	-0.0486683	-0.265503	-0.342994	-0.354802	-0.381056	-0.0456202	-0.127289	-0.100108	-0.020426	-0.112321
1.105	0.0190771	-0.0881947	-0.32046	-0.413992	-0.435058	-0.45335	-0.0766402	-0.188188	-0.10201	-0.050382	-0.176326
1.106	-0.000852512	-0.131962	-0.380545	-0.485345	-0.518052	-0.524026	-0.118448	-0.255312	-0.131206	-0.0922868	-0.250257
1.107	-0.0237792	-0.179261	-0.444348	-0.555116	-0.600944	-0.590824	-0.171108	-0.325639	-0.186954	-0.14709	-0.331662
1.108	-0.0493108	-0.229371	-0.510455	-0.621611	-0.680807	-0.651558	-0.233545	-0.396638	-0.265613	-0.214304	-0.417792
1.109	-0.0770599	-0.281565	-0.577378	-0.683641	-0.754904	-0.704292	-0.303591	-0.466201	-0.361927	-0.292188	-0.505519
1.11	-0.10669	-0.335101	-0.643587	-0.740469	-0.82088	-0.747625	-0.378484	-0.532296	-0.470039	-0.377856	-0.591408
1.111	-0.137854	-0.389282	-0.707748	-0.791679	-0.876987	-0.780829	-0.455118	-0.59283	-0.583989	-0.467465	-0.672077
1.112	-0.170243	-0.443438	-0.768816	-0.837099	-0.922484	-0.803831	-0.530202	-0.64587	-0.698014	-0.556624	-0.744441
1.113	-0.20372	-0.49688	-0.826024	-0.87679	-0.957577	-0.817163	-0.600636	-0.69012	-0.806771	-0.640885	-0.805888
1.114	-0.238213	-0.549066	-0.878954	-0.91107	-0.982912	-0.821875	-0.663764	-0.725028	-0.905668	-0.716334	-0.85453
1.115	-0.27365	-0.599708	-0.927543	-0.940482	-0.999539	-0.819372	-0.717439	-0.750634	-0.991126	-0.780025	-0.889292
1.116	-0.309997	-0.648639	-0.97199	-0.965717	-1.0091	-0.811286	-0.760152	-0.767414	-1.06057	-0.830007	-0.909976
1.117	-0.347162	-0.695845	-1.01274	-0.987436	-1.01344	-0.79938	-0.791193	-0.776118	-1.1125	-0.865296	-0.91736
1.118	-0.385014	-0.741609	-1.05055	-1.00625	-1.01401	-0.785336	-0.810751	-0.777702	-1.1467	-0.885873	-0.912948
1.119	-0.42345	-0.786432	-1.0863	-1.02293	-1.01193	-0.770492	-0.819789	-0.77321	-1.1641	-0.892437	-0.898493
1.12	-0.462381	-0.830767	-1.12075	-1.03837	-1.00823	-0.75567	-0.819676	-0.763604	-1.16646	-0.886229	-0.875891
1.121	-0.501781	-0.874872	-1.15434	-1.05328	-1.00391	-0.741321	-0.81196	-0.749805	-1.15614	-0.869077	-0.847174
1.122	-0.541696	-0.918922	-1.18738	-1.06824	-0.999916	-0.72789	-0.798415	-0.73281	-1.13578	-0.843173	-0.814307
1.123	-0.582109	-0.963013	-1.22021	-1.08375	-0.99702	-0.715891	-0.780929	-0.713658	-1.10789	-0.810669	-0.779075
1.124	-0.622863	-1.00714	-1.25307	-1.10021	-0.995674	-0.705626	-0.76116	-0.693294	-1.07471	-0.773579	-0.742965
1.125	-0.663775	-1.0513	-1.28608	-1.11781	-0.996103	-0.697077	-0.740334	-0.672569	-1.03802	-0.73385	-0.707017
1.126	-0.704704	-1.09553	-1.31927	-1.13656	-0.998552	-0.690008	-0.719231	-0.652277	-0.999252	-0.69325	-0.671978
1.127	-0.745515	-1.13989	-1.35261	-1.1564	-1.00324	-0.684181	-0.698328	-0.633004	-0.959807	-0.653252	-0.638528
1.128	-0.786121	-1.18432	-1.38589	-1.17712	-1.01023	-0.679518	-0.678073	-0.615139	-0.921174	-0.615022	-0.607187
1.129	-0.826478	-1.22862	-1.4188	-1.19828	-1.01944	-0.675955	-0.65888	-0.598985	-0.884693	-0.579412	-0.578174
1.13	-0.86656	-1.27263	-1.45106	-1.21925	-1.03067	-0.673291	-0.640914	-0.584639	-0.851241	-0.547024	-0.551423
1.131	-0.906304	-1.31614	-1.48254	-1.23939	-1.04349	-0.671296	-0.624156	-0.571888	-0.821135	-0.517988	-0.52654
1.132	-0.945564	-1.35892	-1.51321	-1.25835	-1.0573	-0.669745	-0.608676	-0.560201	-0.794251	-0.491697	-0.502847
1.133	-0.98416	-1.40084	-1.54324	-1.27607	-1.07155	-0.66835	-0.594636	-0.548865	-0.770142	-0.467139	-0.479662
1.134	-1.02193	-1.44183	-1.57285	-1.29266	-1.08592	-0.666823	-0.582088	-0.53727	-0.748103	-0.443404	-0.456515
1.135	-1.05881	-1.48176	-1.60204	-1.30823	-1.10007	-0.664998	-0.57092	-0.524925	-0.727289	-0.419875	-0.433195
1.136	-1.09489	-1.52049	-1.63062	-1.32284	-1.11346	-0.662761	-0.560806	-0.511356	-0.706902	-0.39629	-0.40955
1.137	-1.1302	-1.55801	-1.65846	-1.33668	-1.12557	-0.660021	-0.551202	-0.496272	-0.686403	-0.37277	-0.385371
1.138	-1.16466	-1.59451	-1.68535	-1.34992	-1.1362	-0.656789	-0.541628	-0.479748	-0.66553	-0.349645	-0.360653
1.139	-1.19826	-1.63015	-1.7111	-1.36257	-1.14548	-0.653153	-0.531889	-0.46202	-0.644162	-0.327305	-0.335698
1.14	-1.23101	-1.66494	-1.73564	-1.37445	-1.15381	-0.649195	-0.522105	-0.443309	-0.622316	-0.306088	-0.310945
1.141	-1.26286	-1.69873	-1.759	-1.38542	-1.16144	-0.644959	-0.512665	-0.424056	-0.600056	-0.286165	-0.286917
1.142	-1.29371	-1.73137	-1.78128	-1.39543	-1.16822	-0.640417	-0.503918	-0.404943	-0.577333	-0.26767	-0.264181
1.143	-1.32352	-1.76278	-1.80266	-1.40458	-1.17369	-0.635496	-0.495819	-0.386569	-0.554096	-0.250733	-0.243092
1.144	-1.35232	-1.79296	-1.82323	-1.41307	-1.17774	-0.630125	-0.487982	-0.36932	-0.530406	-0.235252	-0.223656
1.145	-1.38025	-1.82199	-1.84308	-1.42113	-1.18079	-0.624287	-0.479965	-0.353399	-0.506498	-0.22083	-0.20578
1.146	-1.40742	-1.84992	-1.86231	-1.42902	-1.18337	-0.618143	-0.471467	-0.338904	-0.482778	-0.207014	-0.189447
1.147	-1.43385	-1.87682	-1.88106	-1.43689	-1.18586	-0.612105	-0.462419	-0.325777	-0.459646	-0.193612	-0.174632
1.148	-1.45939	-1.90287	-1.89951	-1.44483	-1.18842	-0.606672	-0.4531	-0.313694	-0.437495	-0.180641	-0.161275
1.149	-1.4838	-1.92836	-1.91783	-1.45276	-1.19112	-0.602162	-0.444071	-0.302326	-0.416839	-0.16804	-0.149266
1.15	-1.50701	-1.95347	-1.93604	-1.46043	-1.19408	-0.598494	-0.435935	-0.291694	-0.398139	-0.155633	-0.138365
1.151	-1.52923	-1.97818	-1.95407	-1.46768	-1.1973	-0.595379	-0.429177	-0.282005	-0.381597	-0.14333	-0.128353
1.152	-1.55075	-2.00242	-1.97188	-1.47458	-1.20063	-0.592718	-0.424052	-0.273269	-0.367088	-0.131297	-0.119127
1.153	-1.57174	-2.02617	-1.98937	-1.48133	-1.20399	-0.59056	-0.420405	-0.265374	-0.354205	-0.11998	-0.110516
1.154	-1.59214	-2.04944	-2.00641	-1.4881	-1.20726	-0.588871	-0.417667	-0.258266	-0.342523	-0.109935	-0.102434
1.155	-1.61193	-2.07217	-2.02301	-1.49498	-1.21021	-0.587455	-0.41521	-0.251804	-0.331822	-0.101562	-0.095153
1.156	-1.63127	-2.09422	-2.03928	-1.50192	-1.21248	-0.585944	-0.41279	-0.245774	-0.322071	-0.0950126	-0.0891038
1.157	-1.65029	-2.11546	-2.05522	-1.50891	-1.21363	-0.58386	-0.410559	-0.240031	-0.31327	-0.0902764	-0.0845936
1.158	-1.66899	-2.13578	-2.07082	-1.51588	-1.21337	-0.580813	-0.408692	-0.234612	-0.305326	-0.0872731	-0.0817604
1.159	-1.68734	-2.15509	-2.08615	-1.52267	-1.21151	-0.576669	-0.407143	-0.229851	-0.298139	-0.0859248	-0.0805984
1.16	-1.70537	-2.17338	-2.10122	-1.52921	-1.20799	-0.571533	-0.405674	-0.226125	-0.29171	-0.0861685	-0.0809986
1.161	-1.7231	-2.19068	-2.11594	-1.53537	-1.20307	-0.565618	-0.404056	-0.223414	-0.286034	-0.0878866	-0.0828049
1.162	-1.74041	-2.207	-2.13017	-1.54086	-1.19743	-0.559253	-0.402273	-0.221348	-0.280981	-0.0908226	-0.0858801
1.163	-1.75709	-2.22235	-2.14371	-1.54542	-1.19204	-0.552893	-0.400413	-0.219599	-0.276333	-0.0945485	-0.0900345
1.164	-1.77284	-2.23671	-2.15641	-1.54907	-1.18788	-0.546914	-0.398325	-0.218134	-0.271964	-0.0986327	-0.0948439
1.165	-1.78745	-2.25013	-2.16813	-1.55202	-1.1858	-0.541458	-0.395432	-0.217062	-0.267935	-0.102788	-0.0997537
1.166	-1.80104	-2.26263	-2.17874	-1.55448	-1.18626	-0.536549	-0.391116	-0.216394	-0.264329	-0.106721	-0.104438
1.167	-1.81393	-2.27412	-2.188	-1.55662	-1.18924	-0.532112	-0.38539	-0.216059	-0.261153	-0.110112	-0.108968
1.168	-1.82627	-2.28454	-2.19581	-1.55829	-1.19427	-0.527991	-0.378922	-0.216001	-0.258446	-0.112808	-0.113603
1.169	-1.83796	-2.29398	-2.20222	-1.55924	-1.2006	-0.524222	-0.372393	-0.216164	-0.256269	-0.114821	-0.118472
1.17	-1.84875	-2.30266	-2.20734	-1.55937	-1.20739	-0.521026	-0.36609	-0.216412	-0.254595	-0.116198	-0.123467
1.171	-1.85866	-2.3107	-2.21121	-1.55875	-1.21359	-0.518301	-0.360084	-0.216751	-0.25328	-0.117053	-0.128297
1.172	-1.86792	-2.31806	-2.2138	-1.55747	-1.2181	-0.515515	-0.354563	-0.217686	-0.252131	-0.117703	-0.132688
1.173	-1.87664	-2.32468	-2.21515	-1.5556	-1.22018	-0.512315	-0.349815	-0.219879	-0.251128	-0.118624	-0.136489
1.174	-1.88475	-2.33053	-2.21526	-1.55333	-1.21956	-0.508803	-0.345991	-0.223358	-0.250412	-0.120179	-0.139623
1.175	-1.89221	-2.33562	-2.21417	-1.55089	-1.21626	-0.505194	-0.342946	-0.227472	-0.249902	-0.122331	-0.14213
1.176	-1.89897	-2.33998	-2.21196	-1.54835	-1.21044	-0.501573	-0.34024	-0.231492	-0.249168	-0.124676	-0.144176
1.177	-1.90502	-2.34375	-2.20875	-1.54539	-1.20244	-0.49799	-0.337357	-0.234955	-0.247697	-0.126852	-0.145915
1.178	-1.91036	-2.34702	-2.2048	-1.5415	-1.19262	-0.494549	-0.334165	-0.237461	-0.245134	-0.128717	-0.147504
1.179	-1.91508	-2.34975	-2.20046	-1.53635	-1.18123	-0.491363	-0.330875	-0.23858	-0.241356	-0.130078	-0.149214
1.18	-1.91931	-2.3517	-2.19594	-1.52984	-1.16842	-0.488339	-0.327548	-0.238156	-0.236418	-0.13066	-0.151368
1.181	-1.92319	-2.35263	-2.19126	-1.52221	-1.15435	-0.485092	-0.32412	-0.23639	-0.230486	-0.130289	-0.153934
1.182	-1.92677	-2.35234	-2.18629	-1.51394	-1.13933	-0.481143	-0.320566	-0.233563	-0.223878	-0.128777	-0.156294
1.183	-1.93002	-2.35082	-2.18083	-1.50558	-1.12385	-0.476292	-0.316767	-0.229801	-0.217014	-0.125767	-0.157651
1.184	-1.93295	-2.34814	-2.17478	-1.49765	-1.10861	-0.470674	-0.312522	-0.225035	-0.210073	-0.120911	-0.157525
1.185	-1.93565	-2.34451	-2.16823	-1.49063	-1.09423	-0.464442	-0.307598	-0.2192	-0.202756	-0.114205	-0.155812
1.186	-1.93818	-2.34027	-2.16142	-1.48484	-1.08124	-0.457658	-0.30173	-0.212388	-0.194658	-0.106093	-0.152599
1.187	-1.94047	-2.33593	-2.15463	-1.48041	-1.07008	-0.450498	-0.294837	-0.204742	-0.185743	-0.0972499	-0.147845
1.188	-1.94242	-2.3319	-2.14811	-1.47722	-1.06123	-0.443339	-0.287059	-0.196414	-0.176305	-0.0883663	-0.141319
1.189	-1.94398	-2.32842	-2.14201	-1.47503	-1.05491	-0.436695	-0.278606	-0.187681	-0.166823	-0.0802117	-0.132952
1.19	-1.94522	-2.32555	-2.1364	-1.4737	-1.051	-0.431156	-0.269755	-0.178984	-0.157962	-0.0736486	-0.123103
1.191	-1.9462	-2.32321	-2.1313	-1.47311	-1.04912	-0.42725	-0.260905	-0.17087	-0.150374	-0.069236	-0.112458
1.192	-1.94695	-2.32116	-2.12671	-1.47298	-1.04876	-0.425277	-0.252518	-0.163834	-0.144538	-0.0670579	-0.101839
1.193	-1.94752	-2.31915	-2.12261	-1.47283	-1.0493	-0.425332	-0.244964	-0.158181	-0.140842	-0.0669378	-0.0920423
1.194	-1.94808	-2.31707	-2.11898	-1.4723	-1.05013	-0.427311	-0.238551	-0.154006	-0.139487	-0.0684887	-0.0838304
1.195	-1.94882	-2.31494	-2.1158	-1.47127	-1.05069	-0.430806	-0.233729	-0.151294	-0.140376	-0.0712398	-0.0779471
1.196	-1.94985	-2.31259	-2.11288	-1.46969	-1.05049	-0.435245	-0.231017	-0.150047	-0.143231	-0.0748665	-0.0749248
1.197	-1.9512	-2.30986	-2.10992	-1.4676	-1.04923	-0.440204	-0.230698	-0.15016	-0.147594	-0.0790898	-0.0748048
1.198	-1.95284	-2.30667	-2.10677	-1.46511	-1.04688	-0.445386	-0.23248	-0.15118	-0.152844	-0.0835019	-0.0771175
1.199	-1.95468	-2.30288	-2.10345	-1.46215	-1.0435	-0.450472	-0.235582	-0.152538	-0.158347	-0.0876176	-0.0812018
1.2	-1.95656	-2.29836	-2.10003	-1.45852	-1.0392	-0.455247	-0.2393	-0.15387	-0.163565	-0.0910052	-0.0864242
1.201	-1.95816	-2.29309	-2.09638	-1.45409	-1.03412	-0.459608	-0.243229	-0.154896	-0.168039	-0.093329	-0.0921584
1.202	-1.95927	-2.28723	-2.09231	-1.44894	-1.02827	-0.463302	-0.24706	-0.155398	-0.171362	-0.0943965	-0.0978175
1.203	-1.95975	-2.28098	-2.08773	-1.44313	-1.02159	-0.465933	-0.250565	-0.155303	-0.173306	-0.0942242	-0.102865
1.204	-1.95954	-2.27441	-2.08256	-1.43677	-1.01412	-0.467258	-0.25371	-0.154499	-0.17384	-0.0929919	-0.106895
1.205	-1.95855	-2.26754	-2.0766	-1.42995	-1.00617	-0.467286	-0.256557	-0.152809	-0.172954	-0.0909998	-0.109818
1.206	-1.95679	-2.26038	-2.0697	-1.42277	-0.998176	-0.466196	-0.259066	-0.150226	-0.170631	-0.0885859	-0.111762
1.207	-1.95444	-2.253	-2.06194	-1.41543	-0.990514	-0.464182	-0.261133	-0.147007	-0.167009	-0.0860245	-0.112899
1.208	-1.9519	-2.24541	-2.05354	-1.40819	-0.983384	-0.461391	-0.262731	-0.143538	-0.162369	-0.0835887	-0.113319
1.209	-1.94947	-2.23764	-2.04463	-1.40116	-0.977049	-0.458014	-0.263845	-0.140103	-0.156983	-0.0814855	-0.112912
1.21	-1.9471	-2.22973	-2.03533	-1.39428	-0.972001	-0.454327	-0.264316	-0.136678	-0.151125	-0.0796887	-0.11158
1.211	-1.94473	-2.22169	-2.02582	-1.38751	-0.968798	-0.45055	-0.263939	-0.133146	-0.145031	-0.0780037	-0.109519
1.212	-1.94245	-2.21353	-2.01632	-1.38089	-0.967819	-0.44682	-0.262688	-0.129619	-0.138854	-0.0761814	-0.107143
1.213	-1.94027	-2.20523	-2.00711	-1.37454	-0.969252	-0.443286	-0.260664	-0.126253	-0.132743	-0.0740094	-0.104849
1.214	-1.93815	-2.19685	-1.99836	-1.36851	-0.973122	-0.440138	-0.257964	-0.123039	-0.1268	-0.0714723	-0.102829
1.215	-1.93616	-2.18849	-1.99024	-1.36286	-0.979115	-0.437549	-0.254689	-0.119916	-0.121072	-0.0687439	-0.101095
1.216	-1.93431	-2.18015	-1.98281	-1.35765	-0.986546	-0.435612	-0.25103	-0.116856	-0.115624	-0.0658948	-0.0995855
1.217	-1.93256	-2.1718	-1.97591	-1.35291	-0.994641	-0.43424	-0.247327	-0.113847	-0.110534	-0.0627975	-0.0980793
1.218	-1.93089	-2.16353	-1.96915	-1.34841	-1.0027	-0.433167	-0.243907	-0.110928	-0.105866	-0.0594083	-0.0961949
1.219	-1.92922	-2.15557	-1.96211	-1.3439	-1.00999	-0.432155	-0.240801	-0.108152	-0.101694	-0.0558183	-0.0936874
1.22	-1.92738	-2.14785	-1.95468	-1.33941	-1.01577	-0.431108	-0.237799	-0.105424	-0.0981695	-0.052101	-0.0906126
1.221	-1.92511	-2.14009	-1.94694	-1.3351	-1.01951	-0.429941	-0.234877	-0.102524	-0.0954733	-0.0484287	-0.0871002
1.222	-1.92227	-2.13204	-1.93905	-1.33102	-1.02102	-0.428518	-0.232243	-0.0992445	-0.0935423	-0.0451235	-0.083282
1.223	-1.91885	-2.12371	-1.93118	-1.32701	-1.02033	-0.426762	-0.23006	-0.0955025	-0.0919412	-0.0424059	-0.0794392
1.224	-1.91505	-2.11538	-1.92348	-1.3228	-1.0176	-0.424805	-0.228465	-0.0914809	-0.0901207	-0.0402886	-0.0758358
1.225	-1.91122	-2.10738	-1.91589	-1.31819	-1.01293	-0.42288	-0.227553	-0.0874778	-0.0877608	-0.0387095	-0.0725049
1.226	-1.90758	-2.09982	-1.90828	-1.3132	-1.00638	-0.421077	-0.227165	-0.0836388	-0.0848888	-0.0375812	-0.0693644
1.227	-1.90415	-2.0925	-1.90062	-1.30795	-0.998203	-0.419254	-0.226947	-0.0800419	-0.0817285	-0.0367415	-0.0664323
1.228	-1.90073	-2.08515	-1.89295	-1.30259	-0.988873	-0.417268	-0.226608	-0.0768531	-0.0784818	-0.035992	-0.0638875
1.229	-1.89709	-2.07763	-1.88526	-1.29717	-0.978823	-0.415276	-0.226025	-0.0742793	-0.0752174	-0.0352328	-0.0618836
1.23	-1.89308	-2.06996	-1.87747	-1.29173	-0.968425	-0.413639	-0.225183	-0.0724999	-0.0719392	-0.0344441	-0.0602949
1.231	-1.88862	-2.0622	-1.86956	-1.28637	-0.958093	-0.412621	-0.224146	-0.0715368	-0.0686865	-0.0335233	-0.0588398
1.232	-1.88371	-2.05431	-1.86159	-1.28126	-0.94833	-0.412234	-0.223058	-0.0711481	-0.0655153	-0.0323183	-0.0574617
1.233	-1.87845	-2.04628	-1.85366	-1.2764	-0.939669	-0.412303	-0.222095	-0.0709963	-0.0625659	-0.0307443	-0.056189
1.234	-1.87308	-2.03814	-1.84595	-1.27168	-0.932456	-0.412657	-0.221468	-0.0708696	-0.0600991	-0.0287576	-0.0547825
1.235	-1.8679	-2.02992	-1.83863	-1.26704	-0.926762	-0.413127	-0.221317	-0.0706771	-0.0582865	-0.0263773	-0.0529958
1.236	-1.8631	-2.02169	-1.83172	-1.26239	-0.922389	-0.413488	-0.221529	-0.0703173	-0.0570957	-0.0237442	-0.0508827
1.237	-1.85863	-2.01355	-1.82508	-1.25766	-0.918965	-0.413593	-0.221834	-0.0696084	-0.0563571	-0.0210283	-0.0485429
1.238	-1.85412	-2.00552	-1.81851	-1.25294	-0.916169	-0.413409	-0.222114	-0.0684136	-0.0558188	-0.018335	-0.0458481
1.239	-1.84933	-1.99748	-1.81188	-1.24842	-0.913749	-0.412938	-0.222517	-0.0668495	-0.055199	-0.0158389	-0.0426559
1.24	-1.84434	-1.98939	-1.8052	-1.24419	-0.911443	-0.41218	-0.223197	-0.0652338	-0.0542256	-0.0138305	-0.039124
1.241	-1.83927	-1.98151	-1.7985	-1.24022	-0.909082	-0.411136	-0.224002	-0.0638246	-0.0527096	-0.0124006	-0.0356336
1.242	-1.83415	-1.97414	-1.79175	-1.23647	-0.906766	-0.40978	-0.224469	-0.062701	-0.0506218	-0.011324	-0.0325443
1.243	-1.82893	-1.96721	-1.78496	-1.23291	-0.90479	-0.407995	-0.224258	-0.0618595	-0.0481053	-0.0104249	-0.030076
1.244	-1.8237	-1.96038	-1.77819	-1.22956	-0.903307	-0.405633	-0.223555	-0.0612096	-0.0454742	-0.00976914	-0.0282564
1.245	-1.81856	-1.9534	-1.77145	-1.22643	-0.902242	-0.402729	-0.222756	-0.0605188	-0.0430166	-0.00942216	-0.026959
1.246	-1.81353	-1.94625	-1.7647	-1.2234	-0.901568	-0.399536	-0.22211	-0.0596481	-0.0408305	-0.00931136	-0.0259988
1.247	-1.8085	-1.93893	-1.75788	-1.22022	-0.901459	-0.396409	-0.22181	-0.058686	-0.0390303	-0.009343	-0.0251432
1.248	-1.80336	-1.93142	-1.75095	-1.21675	-0.902161	-0.39365	-0.221983	-0.0577439	-0.0377958	-0.00948049	-0.0241561
1.249	-1.79812	-1.92378	-1.74402	-1.21308	-0.903893	-0.391476	-0.222557	-0.0568632	-0.0371565	-0.00971645	-0.022912
1.25	-1.79281	-1.91613	-1.7373	-1.20924	-0.906803	-0.390016	-0.223321	-0.0561297	-0.036963	-0.0100024	-0.0214886
1.251	-1.78743	-1.90866	-1.73092	-1.20515	-0.910721	-0.38922	-0.224029	-0.0555975	-0.0369991	-0.0102437	-0.0201139
1.252	-1.78195	-1.9015	-1.7249	-1.20068	-0.915106	-0.388911	-0.224465	-0.0551475	-0.0371105	-0.0103868	-0.0189491
1.253	-1.77649	-1.8946	-1.71913	-1.19576	-0.919429	-0.388824	-0.224604	-0.0546455	-0.0371986	-0.0104057	-0.0179938
1.254	-1.77126	-1.8878	-1.71344	-1.19046	-0.923412	-0.38855	-0.224744	-0.0540242	-0.0371236	-0.0101774	-0.0171384
1.255	-1.76631	-1.88099	-1.70768	-1.18479	-0.926814	-0.3877	-0.225282	-0.0532743	-0.0368126	-0.00959013	-0.0162792
1.256	-1.76157	-1.8741	-1.70179	-1.17877	-0.929419	-0.386125	-0.226385	-0.0525624	-0.0363027	-0.00878297	-0.0154036
1.257	-1.75692	-1.86701	-1.69574	-1.17251	-0.931162	-0.383856	-0.227952	-0.0521029	-0.0356376	-0.00796694	-0.0145126
1.258	-1.75227	-1.85966	-1.68956	-1.16629	-0.931988	-0.381046	-0.229681	-0.0519385	-0.0348805	-0.0071932	-0.0136075
1.259	-1.74765	-1.85223	-1.68328	-1.16028	-0.931826	-0.377899	-0.231148	-0.0519304	-0.0340582	-0.00656767	-0.0127485
1.26	-1.74302	-1.84491	-1.67694	-1.15451	-0.930688	-0.374538	-0.231962	-0.0518437	-0.033124	-0.00637014	-0.0119927
1.261	-1.73818	-1.83778	-1.6706	-1.14897	-0.92857	-0.371082	-0.231929	-0.0514773	-0.0319238	-0.00676653	-0.0113702
1.262	-1.73304	-1.83081	-1.66445	-1.1437	-0.92536	-0.36774	-0.231048	-0.0507408	-0.0299629	-0.00757126	-0.010949
1.263	-1.72773	-1.82391	-1.65864	-1.1388	-0.920956	-0.364742	-0.229416	-0.0497085	-0.0265835	-0.00838665	-0.0107441
1.264	-1.72244	-1.81707	-1.65319	-1.13418	-0.915401	-0.362293	-0.227216	-0.0485724	-0.0215092	-0.00889587	-0.0105952
1.265	-1.71714	-1.8103	-1.648	-1.12968	-0.908915	-0.36058	-0.224654	-0.0473827	-0.0150021	-0.00900408	-0.0102615
1.266	-1.71173	-1.80352	-1.64285	-1.12527	-0.901867	-0.359658	-0.221805	-0.0459424	-0.00767842	-0.0087567	-0.00952556
1.267	-1.70611	-1.79668	-1.63767	-1.12108	-0.894675	-0.359393	-0.218709	-0.0440219	-0.000208711	-0.00812078	-0.00828774
1.268	-1.70032	-1.78988	-1.63249	-1.11719	-0.887714	-0.359581	-0.21559	-0.0415565	0.00687214	-0.00689115	-0.00660608
1.269	-1.6946	-1.78327	-1.62737	-1.11337	-0.881283	-0.360029	-0.21285	-0.0386573	0.0130348	-0.00485303	-0.00455859
1.27	-1.68909	-1.77683	-1.6224	-1.10932	-0.87544	-0.360588	-0.210757	-0.0355571	0.0176427	-0.00201147	-0.00222079
1.271	-1.68372	-1.77042	-1.6175	-1.10494	-0.869943	-0.361126	-0.209284	-0.0325598	0.0202012	0.00129791	0.00029224
1.272	-1.67836	-1.76392	-1.61252	-1.10039	-0.864499	-0.361462	-0.208269	-0.0299383	0.0206936	0.00456105	0.00278941
1.273	-1.67293	-1.75728	-1.60736	-1.09585	-0.858895	-0.361429	-0.20752	-0.0278552	0.0194485	0.00743502	0.00498773
1.274	-1.66747	-1.75061	-1.60195	-1.09152	-0.853018	-0.361009	-0.20688	-0.0264688	0.0168112	0.009893	0.00667796
1.275	-1.66218	-1.74406	-1.59626	-1.08768	-0.846899	-0.360322	-0.206317	-0.0259824	0.0130999	0.0120417	0.00772268
1.276	-1.65727	-1.73771	-1.59034	-1.08454	-0.840644	-0.359482	-0.205895	-0.0264496	0.00858193	0.0138263	0.00798972
1.277	-1.6526	-1.73154	-1.58446	-1.08208	-0.834437	-0.35857	-0.205701	-0.0276302	0.00353159	0.0149558	0.00751846
1.278	-1.64782	-1.72548	-1.57888	-1.08002	-0.828542	-0.35764	-0.205706	-0.0291438	-0.00163868	0.0152564	0.00650308
1.279	-1.64271	-1.71954	-1.5736	-1.07804	-0.823153	-0.356741	-0.205607	-0.0308039	-0.00658448	0.014899	0.00518438
1.28	-1.63729	-1.71368	-1.56838	-1.07592	-0.818324	-0.355935	-0.205112	-0.0326561	-0.0111895	0.01409	0.00385427
1.281	-1.63173	-1.70782	-1.56302	-1.07354	-0.814031	-0.35523	-0.204324	-0.0346485	-0.0153607	0.0128602	0.00270413
1.282	-1.62627	-1.70194	-1.55761	-1.07085	-0.810226	-0.354536	-0.203515	-0.0365075	-0.0189289	0.0112262	0.00176434
1.283	-1.62097	-1.69603	-1.55233	-1.0678	-0.806868	-0.353791	-0.202776	-0.037933	-0.0217916	0.00931498	0.00107406
1.284	-1.6157	-1.69011	-1.54714	-1.06441	-0.804021	-0.353206	-0.202075	-0.0387798	-0.0239933	0.00739779	0.000725089
1.285	-1.61041	-1.68427	-1.54191	-1.06086	-0.801822	-0.353106	-0.201426	-0.0391545	-0.0256953	0.00574902	0.000761599
1.286	-1.60513	-1.67857	-1.53659	-1.05744	-0.800281	-0.353519	-0.200897	-0.0393645	-0.0270852	0.00436538	0.00106936
1.287	-1.59985	-1.67293	-1.5312	-1.0544	-0.799206	-0.35425	-0.200559	-0.0395869	-0.028184	0.00303468	0.00147374
1.288	-1.5946	-1.66729	-1.52582	-1.05177	-0.798279	-0.355123	-0.200567	-0.0396692	-0.0287951	0.00157543	0.0020145
1.289	-1.58944	-1.66168	-1.52061	-1.04935	-0.797254	-0.355953	-0.201169	-0.0394069	-0.0287511	-0.000135302	0.00284802
1.29	-1.5844	-1.65615	-1.51566	-1.04692	-0.796121	-0.356648	-0.202436	-0.0388064	-0.0280447	-0.00208198	0.0039138
1.291	-1.57934	-1.65078	-1.51093	-1.04437	-0.795052	-0.357285	-0.204127	-0.0380527	-0.0267078	-0.00401694	0.00490578
1.292	-1.5742	-1.6456	-1.50634	-1.04173	-0.794178	-0.35787	-0.20584	-0.0374593	-0.0247881	-0.00567652	0.00543393
1.293	-1.56905	-1.64062	-1.50188	-1.03915	-0.793432	-0.358207	-0.207211	-0.0374438	-0.0224935	-0.00711106	0.005197
1.294	-1.56396	-1.63565	-1.49758	-1.03685	-0.792635	-0.358044	-0.208099	-0.038387	-0.0202337	-0.00870256	0.00408056
1.295	-1.55892	-1.6304	-1.4934	-1.03476	-0.791762	-0.357239	-0.208538	-0.0403813	-0.0184222	-0.0108067	0.00207217
1.296	-1.55384	-1.6247	-1.48936	-1.03266	-0.79108	-0.355861	-0.208466	-0.0430808	-0.017257	-0.0133877	-0.00071601
1.297	-1.54863	-1.61868	-1.48541	-1.03039	-0.790888	-0.354199	-0.207787	-0.045882	-0.0167131	-0.0160661	-0.00393268
1.298	-1.54327	-1.61266	-1.48144	-1.02778	-0.791147	-0.352667	-0.206587	-0.0482632	-0.0166913	-0.0184505	-0.00715521
1.299	-1.53772	-1.60682	-1.47747	-1.0246	-0.791489	-0.351623	-0.205103	-0.0499813	-0.017165	-0.0203204	-0.0101312
1.3	-1.53198	-1.60116	-1.47352	-1.02075	-0.791554	-0.351216	-0.203628	-0.0510711	-0.0182193	-0.0216031	-0.0127387
1.301	-1.52622	-1.59561	-1.46944	-1.01633	-0.791273	-0.351296	-0.202416	-0.0517361	-0.0199005	-0.0222872	-0.0148058
1.302	-1.52063	-1.59019	-1.46514	-1.01159	-0.790719	-0.35145	-0.201652	-0.0522334	-0.0220503	-0.0224572	-0.0160853
1.303	-1.51528	-1.585	-1.46071	-1.00677	-0.789799	-0.351332	-0.201471	-0.0527109	-0.0244053	-0.0223527	-0.0163891
1.304	-1.5101	-1.58011	-1.45633	-1.00202	-0.78828	-0.350996	-0.201893	-0.0530728	-0.026706	-0.0221554	-0.0157896
1.305	-1.50492	-1.57529	-1.45205	-0.997284	-0.786009	-0.350746	-0.202765	-0.0530943	-0.0286724	-0.0218868	-0.0146456
1.306	-1.49954	-1.57011	-1.44772	-0.992471	-0.783005	-0.3507	-0.203879	-0.0526458	-0.0301142	-0.0217032	-0.0133662
1.307	-1.4939	-1.56427	-1.4432	-0.987655	-0.779447	-0.350604	-0.205177	-0.0517434	-0.0311118	-0.0219319	-0.0122758
1.308	-1.48813	-1.55771	-1.43853	-0.982974	-0.775515	-0.350072	-0.206733	-0.05047	-0.031951	-0.0227081	-0.0115877
1.309	-1.4825	-1.55037	-1.43368	-0.978479	-0.771267	-0.348972	-0.208474	-0.0489976	-0.0328674	-0.0239087	-0.0113769
1.31	-1.47724	-1.54228	-1.42861	-0.974189	-0.766691	-0.347535	-0.210055	-0.0475597	-0.033936	-0.0253979	-0.0116905
1.311	-1.47241	-1.53373	-1.42349	-0.97014	-0.761788	-0.346078	-0.211046	-0.0462871	-0.0350592	-0.0270742	-0.0126083
1.312	-1.46793	-1.52514	-1.41869	-0.966316	-0.756675	-0.344706	-0.211139	-0.0451902	-0.0360704	-0.028672	-0.0141589
1.313	-1.4637	-1.51679	-1.41431	-0.962571	-0.751656	-0.343259	-0.210235	-0.044232	-0.0369871	-0.0297908	-0.0162915
1.314	-1.45964	-1.50885	-1.41017	-0.958685	-0.747161	-0.341625	-0.208442	-0.0433779	-0.0381203	-0.0302119	-0.0188254
1.315	-1.45561	-1.50146	-1.40613	-0.954644	-0.743528	-0.340001	-0.205978	-0.0426704	-0.0399786	-0.0300176	-0.0213484
1.316	-1.45149	-1.49478	-1.40207	-0.950771	-0.740795	-0.338655	-0.203145	-0.0422473	-0.0428249	-0.0294684	-0.0233259
1.317	-1.44721	-1.48879	-1.39777	-0.947331	-0.738759	-0.337747	-0.200268	-0.0421789	-0.0462232	-0.0287561	-0.024357
1.318	-1.44275	-1.48341	-1.39312	-0.944315	-0.737259	-0.337316	-0.197614	-0.0423125	-0.0491717	-0.0278514	-0.0243874
1.319	-1.43806	-1.47855	-1.38822	-0.941665	-0.736282	-0.337156	-0.19541	-0.0424554	-0.0507863	-0.0266638	-0.0236703
1.32	-1.43311	-1.47409	-1.38329	-0.939334	-0.735716	-0.336899	-0.193776	-0.0425779	-0.0512596	-0.0251812	-0.0224243
1.321	-1.42793	-1.47001	-1.37846	-0.937163	-0.735263	-0.336308	-0.192632	-0.0426309	-0.0520701	-0.0234678	-0.0207332
1.322	-1.42269	-1.46633	-1.37375	-0.934889	-0.734662	-0.335394	-0.191779	-0.0424193	-0.0547894	-0.0216985	-0.0186816
1.323	-1.41754	-1.46304	-1.36915	-0.932236	-0.733755	-0.33428	-0.191047	-0.0418686	-0.0598632	-0.0201776	-0.016311
1.324	-1.41262	-1.45995	-1.36461	-0.929104	-0.732405	-0.333102	-0.190393	-0.0411824	-0.0665953	-0.0192569	-0.0136676
1.325	-1.40789	-1.45681	-1.36008	-0.925691	-0.730533	-0.332027	-0.189783	-0.0406656	-0.073763	-0.0192488	-0.0110033
1.326	-1.40323	-1.45352	-1.35566	-0.922255	-0.728189	-0.331103	-0.189098	-0.0405139	-0.0801695	-0.0203811	-0.0087161
1.327	-1.39851	-1.45011	-1.35157	-0.918878	-0.725538	-0.33017	-0.18833	-0.0407082	-0.0849365	-0.0226322	-0.00709376
1.328	-1.39369	-1.44654	-1.34783	-0.915628	-0.722793	-0.329064	-0.187649	-0.0411355	-0.0875337	-0.025625	-0.00624851
1.329	-1.38889	-1.44283	-1.34431	-0.912744	-0.720206	-0.3278	-0.187156	-0.0417756	-0.0877522	-0.0289046	-0.00623611
1.33	-1.38422	-1.43908	-1.34088	-0.91043	-0.717975	-0.326479	-0.186799	-0.0426738	-0.0855603	-0.0322029	-0.0071515
1.331	-1.37972	-1.43549	-1.33754	-0.90866	-0.716084	-0.325185	-0.186599	-0.0438431	-0.0810325	-0.035276	-0.00904658
1.332	-1.3753	-1.43218	-1.33421	-0.907266	-0.714383	-0.324074	-0.186658	-0.0452894	-0.0745804	-0.0377097	-0.011725
1.333	-1.37071	-1.42914	-1.33084	-0.905986	-0.712745	-0.323396	-0.186902	-0.0471	-0.0670016	-0.039088	-0.0147151
1.334	-1.36573	-1.42632	-1.32744	-0.904566	-0.711035	-0.323249	-0.187079	-0.0492747	-0.0591111	-0.0392003	-0.0174444
1.335	-1.36042	-1.42358	-1.32405	-0.902976	-0.709139	-0.32348	-0.187046	-0.0514886	-0.0514381	-0.0380176	-0.0194949
1.336	-1.35506	-1.42064	-1.32076	-0.901331	-0.707107	-0.323872	-0.18693	-0.0533312	-0.0442577	-0.0356748	-0.0206921
1.337	-1.34983	-1.41733	-1.31773	-0.899628	-0.70507	-0.324278	-0.186921	-0.0546064	-0.0377094	-0.0325097	-0.0209196
1.338	-1.34479	-1.41371	-1.31508	-0.897664	-0.703068	-0.324633	-0.187002	-0.0552345	-0.0319339	-0.0290008	-0.02013
1.339	-1.33997	-1.40994	-1.31277	-0.89521	-0.701124	-0.325024	-0.187014	-0.0551497	-0.0271615	-0.0256005	-0.0184758
1.34	-1.3354	-1.4061	-1.31061	-0.892276	-0.699298	-0.325574	-0.186906	-0.054404	-0.0235897	-0.0226284	-0.016241
1.341	-1.33116	-1.40215	-1.30854	-0.889128	-0.697529	-0.326214	-0.186705	-0.0532091	-0.0211929	-0.0203065	-0.0137658
1.342	-1.32723	-1.39805	-1.30661	-0.885971	-0.695641	-0.32675	-0.186417	-0.0518212	-0.0197293	-0.0188778	-0.0113728
1.343	-1.32328	-1.39381	-1.30487	-0.882745	-0.69362	-0.327015	-0.186137	-0.0504532	-0.0189449	-0.0185874	-0.00932592
1.344	-1.31902	-1.38957	-1.30325	-0.87937	-0.691644	-0.326947	-0.1859	-0.0492549	-0.0187421	-0.0194634	-0.00789571
1.345	-1.31439	-1.38555	-1.30156	-0.876015	-0.689828	-0.326603	-0.185469	-0.0483109	-0.019228	-0.0213578	-0.00732751
1.346	-1.30952	-1.38192	-1.29973	-0.872871	-0.688121	-0.326074	-0.184783	-0.0477091	-0.0206026	-0.0240956	-0.00767837
1.347	-1.30456	-1.37854	-1.29783	-0.869853	-0.686453	-0.325464	-0.184164	-0.0475898	-0.022939	-0.0272923	-0.0087691
1.348	-1.29969	-1.37511	-1.29591	-0.866779	-0.684825	-0.324904	-0.183772	-0.0479874	-0.0260441	-0.0303487	-0.0103129
1.349	-1.29506	-1.37143	-1.29395	-0.863676	-0.683252	-0.324442	-0.183439	-0.0486457	-0.0294737	-0.0328275	-0.012075
1.35	-1.2908	-1.36744	-1.29192	-0.860704	-0.681822	-0.323893	-0.182984	-0.0491379	-0.0327164	-0.0345868	-0.0139083
1.351	-1.28687	-1.36324	-1.28981	-0.857932	-0.680662	-0.322981	-0.18228	-0.0492333	-0.0354357	-0.0355886	-0.0156085
1.352	-1.2831	-1.35907	-1.28761	-0.855318	-0.679771	-0.321743	-0.181282	-0.0490263	-0.0374599	-0.0358436	-0.0168165
1.353	-1.27937	-1.35504	-1.28531	-0.85283	-0.679016	-0.320541	-0.180168	-0.0486609	-0.0387333	-0.0354525	-0.0171618
1.354	-1.27563	-1.35113	-1.28287	-0.850458	-0.678124	-0.319594	-0.179245	-0.0481659	-0.0394605	-0.0345646	-0.016563
1.355	-1.27199	-1.34725	-1.28028	-0.848084	-0.676768	-0.318789	-0.178773	-0.0475524	-0.0399252	-0.033351	-0.0152949
1.356	-1.26862	-1.34336	-1.27758	-0.845552	-0.674832	-0.317858	-0.178966	-0.0468639	-0.0401627	-0.0319413	-0.013679
1.357	-1.26553	-1.33944	-1.27463	-0.842855	-0.672429	-0.316628	-0.179899	-0.0461385	-0.040047	-0.0304083	-0.0119336
1.358	-1.26257	-1.33548	-1.27132	-0.840096	-0.669692	-0.315166	-0.181375	-0.0454183	-0.0394913	-0.0289092	-0.0102476
1.359	-1.25951	-1.3315	-1.26768	-0.83736	-0.66675	-0.313526	-0.182978	-0.044808	-0.0385068	-0.0278092	-0.00873783
1.36	-1.25615	-1.32756	-1.26368	-0.834701	-0.663796	-0.311541	-0.184248	-0.0444073	-0.0371984	-0.0275251	-0.00746297
1.361	-1.25239	-1.32381	-1.25915	-0.832124	-0.661011	-0.309151	-0.184895	-0.0442277	-0.0357146	-0.028061	-0.00646685
1.362	-1.24827	-1.32032	-1.25415	-0.82958	-0.658433	-0.306644	-0.184917	-0.0442242	-0.034233	-0.028875	-0.0057768
1.363	-1.24384	-1.31704	-1.2489	-0.82698	-0.655908	-0.304485	-0.184381	-0.04436	-0.0329522	-0.0293975	-0.00549286
1.364	-1.23916	-1.31385	-1.24366	-0.824327	-0.653197	-0.303012	-0.183366	-0.0446419	-0.0319991	-0.0294521	-0.00574933
1.365	-1.2344	-1.31072	-1.23859	-0.821736	-0.650226	-0.302255	-0.182135	-0.0449251	-0.0314707	-0.029099	-0.00651672
1.366	-1.22984	-1.30768	-1.23379	-0.819302	-0.647191	-0.302105	-0.180993	-0.0448639	-0.0314846	-0.0283596	-0.00762623
1.367	-1.2256	-1.3047	-1.22926	-0.817046	-0.644412	-0.30255	-0.180131	-0.0442852	-0.0319779	-0.0272777	-0.0089125
1.368	-1.22157	-1.30165	-1.22493	-0.814872	-0.642101	-0.303606	-0.179656	-0.0432798	-0.032679	-0.0260215	-0.0102044
1.369	-1.2176	-1.29851	-1.22073	-0.812614	-0.640258	-0.305115	-0.179575	-0.0419325	-0.0333509	-0.0246816	-0.0113173
1.37	-1.21365	-1.29532	-1.21662	-0.810158	-0.638684	-0.306633	-0.179911	-0.0402993	-0.0338781	-0.023101	-0.0120406
1.371	-1.20962	-1.29215	-1.21265	-0.807442	-0.63712	-0.307661	-0.180699	-0.0384384	-0.0341399	-0.0210771	-0.0122057
1.372	-1.20538	-1.289	-1.20891	-0.804464	-0.635373	-0.30806	-0.181617	-0.0363327	-0.0340021	-0.0186493	-0.0118459
1.373	-1.20083	-1.28582	-1.20541	-0.801233	-0.633274	-0.308143	-0.182003	-0.0340662	-0.0334578	-0.0161451	-0.0111209
1.374	-1.19594	-1.28247	-1.20212	-0.797739	-0.630735	-0.308408	-0.181515	-0.0319311	-0.0325634	-0.0140469	-0.0101669
1.375	-1.19081	-1.27889	-1.19897	-0.794143	-0.627848	-0.309163	-0.180469	-0.0301776	-0.0313243	-0.012816	-0.00908351
1.376	-1.18565	-1.27519	-1.19584	-0.790681	-0.624779	-0.310324	-0.179377	-0.0288947	-0.0298373	-0.012709	-0.00794038
1.377	-1.18062	-1.2716	-1.1926	-0.78748	-0.621691	-0.31167	-0.17848	-0.0281442	-0.0283583	-0.0136988	-0.00684244
1.378	-1.1758	-1.26814	-1.18921	-0.784698	-0.618657	-0.313135	-0.177734	-0.0280447	-0.0271673	-0.0155593	-0.00603838
1.379	-1.17133	-1.2647	-1.1857	-0.782451	-0.615546	-0.314679	-0.176955	-0.0287293	-0.0264688	-0.0178955	-0.00583894
1.38	-1.16727	-1.26123	-1.18222	-0.780629	-0.612243	-0.316201	-0.176063	-0.0301874	-0.0262437	-0.0200798	-0.00631412
1.381	-1.1636	-1.25774	-1.17891	-0.77907	-0.608986	-0.317643	-0.175188	-0.0321908	-0.0261464	-0.0213972	-0.00718875
1.382	-1.16023	-1.25428	-1.17581	-0.777687	-0.606221	-0.318975	-0.174446	-0.0344756	-0.0258377	-0.0214394	-0.008054
1.383	-1.1571	-1.25083	-1.1729	-0.776379	-0.604202	-0.320106	-0.17393	-0.0369031	-0.025398	-0.0203481	-0.00858125
1.384	-1.15422	-1.24742	-1.1703	-0.775049	-0.602932	-0.320958	-0.173749	-0.0393497	-0.025101	-0.0185874	-0.00868434
1.385	-1.15161	-1.24417	-1.168	-0.773643	-0.602223	-0.321589	-0.173808	-0.0415869	-0.0249508	-0.0165648	-0.00844978
1.386	-1.14914	-1.24126	-1.16585	-0.772156	-0.601799	-0.32216	-0.173856	-0.0433883	-0.0246933	-0.0144722	-0.007801
1.387	-1.14655	-1.23874	-1.1636	-0.770587	-0.601436	-0.322836	-0.17377	-0.0445987	-0.0241065	-0.0123626	-0.00648015
1.388	-1.14367	-1.23646	-1.1611	-0.768868	-0.600899	-0.323663	-0.17359	-0.0450986	-0.0231932	-0.0104557	-0.00446387
1.389	-1.14053	-1.2343	-1.15832	-0.766924	-0.599961	-0.32455	-0.173418	-0.0449269	-0.0221272	-0.00917334	-0.00211651
1.39	-1.13726	-1.23218	-1.15528	-0.764737	-0.598527	-0.325404	-0.173376	-0.0443282	-0.0210645	-0.00872976	0.000136087
1.391	-1.13394	-1.22996	-1.15197	-0.762269	-0.59663	-0.326128	-0.173617	-0.0435705	-0.0201014	-0.0091768	0.00200574
1.392	-1.1306	-1.2275	-1.14844	-0.759452	-0.594392	-0.326563	-0.174273	-0.0428832	-0.0193017	-0.0107587	0.00329938
1.393	-1.12722	-1.22481	-1.14488	-0.756409	-0.59201	-0.326587	-0.175319	-0.0424247	-0.0186774	-0.013641	0.00395455
1.394	-1.12376	-1.22208	-1.14141	-0.753485	-0.589597	-0.326106	-0.176539	-0.0421886	-0.0182627	-0.0175958	0.00397197
1.395	-1.12024	-1.21934	-1.13809	-0.75098	-0.587096	-0.32507	-0.177729	-0.0421065	-0.0181197	-0.0221031	0.00326035
1.396	-1.11677	-1.21653	-1.13485	-0.748917	-0.584513	-0.323696	-0.178794	-0.0420789	-0.0182078	-0.0264008	0.00183791
1.397	-1.11341	-1.21358	-1.13163	-0.74712	-0.582063	-0.322411	-0.179664	-0.0419353	-0.0184019	-0.029702	0.000108949
1.398	-1.11015	-1.21041	-1.12847	-0.745388	-0.580013	-0.32152	-0.180279	-0.0417185	-0.0185503	-0.0316012	-0.00139
1.399	-1.10698	-1.20689	-1.12547	-0.743587	-0.578577	-0.321114	-0.18059	-0.0417466	-0.0185305	-0.0321646	-0.00243248
1.4	-1.10391	-1.20309	-1.12262	-0.741741	-0.577859	-0.321167	-0.180605	-0.0421996	-0.0184704	-0.0316863	-0.00314213
1.401	-1.10088	-1.19917	-1.11985	-0.739908	-0.577717	-0.321649	-0.180445	-0.0430207	-0.0187035	-0.0305152	-0.0036796
1.402	-1.09779	-1.19538	-1.11711	-0.738063	-0.577783	-0.322565	-0.180324	-0.0441108	-0.0193583	-0.0290497	-0.0040488
1.403	-1.0946	-1.19187	-1.11449	-0.736188	-0.577743	-0.323829	-0.180433	-0.0453115	-0.020232	-0.0275938	-0.00421795
1.404	-1.0913	-1.18872	-1.11203	-0.734276	-0.577452	-0.325284	-0.180795	-0.0463775	-0.021034	-0.0262755	-0.00420426
1.405	-1.08785	-1.18588	-1.10976	-0.732269	-0.576785	-0.326818	-0.181344	-0.0470537	-0.0215748	-0.0251746	-0.00411568
1.406	-1.08424	-1.18327	-1.1077	-0.730138	-0.575588	-0.328301	-0.182071	-0.0470564	-0.0217948	-0.0243522	-0.00417688
1.407	-1.08053	-1.18078	-1.10583	-0.727929	-0.573788	-0.329607	-0.18294	-0.0461854	-0.0217299	-0.0238186	-0.00450425
1.408	-1.07683	-1.17839	-1.10397	-0.725724	-0.57152	-0.330672	-0.183817	-0.0445605	-0.0214724	-0.0234418	-0.00500918
1.409	-1.07324	-1.176	-1.10183	-0.7236	-0.569052	-0.331352	-0.184546	-0.0425325	-0.021166	-0.0230137	-0.00557934
1.41	-1.06979	-1.17353	-1.09935	-0.721603	-0.566542	-0.331402	-0.185127	-0.0405112	-0.020949	-0.0225514	-0.00613663
1.411	-1.06638	-1.17092	-1.09661	-0.719758	-0.564051	-0.330728	-0.185715	-0.0388494	-0.0208842	-0.0222267	-0.00662834
1.412	-1.06286	-1.16817	-1.09371	-0.718079	-0.561671	-0.329594	-0.186319	-0.0375585	-0.0210598	-0.0220721	-0.00707183
1.413	-1.05922	-1.16534	-1.09069	-0.716518	-0.559521	-0.32841	-0.186699	-0.0363994	-0.0215675	-0.0220081	-0.00752427
1.414	-1.05555	-1.16253	-1.08762	-0.714979	-0.557728	-0.327465	-0.186692	-0.035387	-0.0222262	-0.0219705	-0.00798589
1.415	-1.05207	-1.15989	-1.08457	-0.713451	-0.556396	-0.326902	-0.186328	-0.0348539	-0.0226451	-0.0218967	-0.00836368
1.416	-1.04892	-1.15747	-1.08166	-0.711997	-0.55545	-0.326644	-0.185619	-0.0351318	-0.0226614	-0.0217746	-0.00852945
1.417	-1.04594	-1.15515	-1.07899	-0.710564	-0.554688	-0.326472	-0.184643	-0.0363478	-0.0224416	-0.0216775	-0.00835848
1.418	-1.04289	-1.15283	-1.07665	-0.708961	-0.554009	-0.326306	-0.183669	-0.0382894	-0.0221886	-0.0216097	-0.00777103
1.419	-1.03967	-1.15034	-1.07459	-0.707041	-0.553363	-0.326231	-0.183003	-0.0404458	-0.0219766	-0.021409	-0.00678334
1.42	-1.03621	-1.14756	-1.0727	-0.704768	-0.552563	-0.326393	-0.182789	-0.0422597	-0.0217484	-0.0208047	-0.00532952
1.421	-1.03258	-1.14451	-1.07092	-0.702228	-0.551513	-0.327004	-0.182905	-0.0432466	-0.0212411	-0.0195256	-0.00317199
1.422	-1.02899	-1.14132	-1.06904	-0.69954	-0.550389	-0.328188	-0.18303	-0.0430379	-0.0200613	-0.0174039	-0.000273837
1.423	-1.02564	-1.13817	-1.0669	-0.69668	-0.549409	-0.329796	-0.182913	-0.0416257	-0.0179923	-0.0144948	0.00301818
1.424	-1.02257	-1.13516	-1.06443	-0.693644	-0.548648	-0.331518	-0.182558	-0.0394481	-0.0151715	-0.0111008	0.00620183
1.425	-1.01966	-1.13231	-1.06167	-0.690693	-0.548043	-0.332902	-0.182112	-0.0370062	-0.0120233	-0.00770784	0.00875132
1.426	-1.01668	-1.12963	-1.05879	-0.688131	-0.547433	-0.333493	-0.181665	-0.0346185	-0.00907899	-0.004978	0.0102582
1.427	-1.01348	-1.12704	-1.05588	-0.68601	-0.546736	-0.333335	-0.181222	-0.0325393	-0.0067913	-0.00345893	0.010522
1.428	-1.01005	-1.12448	-1.05291	-0.684151	-0.545991	-0.332931	-0.180782	-0.0309622	-0.0053619	-0.0032439	0.0094279
1.429	-1.00637	-1.12201	-1.04986	-0.682453	-0.54519	-0.33261	-0.180391	-0.0300035	-0.00473434	-0.00407145	0.00713778
1.43	-1.00248	-1.11973	-1.0468	-0.681018	-0.544303	-0.332397	-0.180061	-0.0298373	-0.00476287	-0.00544334	0.00430662
1.431	-0.998531	-1.1176	-1.04382	-0.680034	-0.543393	-0.332335	-0.179675	-0.0306418	-0.00525873	-0.00673824	0.00169839
1.432	-0.994657	-1.11551	-1.04109	-0.679608	-0.542507	-0.332587	-0.179071	-0.0323695	-0.00596204	-0.00752467	-0.000172464
1.433	-0.990959	-1.11334	-1.03876	-0.679572	-0.541655	-0.333283	-0.178157	-0.0347127	-0.00659797	-0.0076086	-0.00103654
1.434	-0.987472	-1.11114	-1.03682	-0.679516	-0.540908	-0.334374	-0.176933	-0.0372113	-0.006926	-0.00687245	-0.000940018
1.435	-0.984236	-1.10912	-1.03502	-0.679085	-0.54033	-0.335647	-0.175512	-0.0393906	-0.00680037	-0.0054219	-0.00024226
1.436	-0.98129	-1.10748	-1.03307	-0.678119	-0.539904	-0.3369	-0.174196	-0.0409865	-0.00634421	-0.00359078	0.000735077
1.437	-0.978552	-1.10617	-1.03083	-0.676638	-0.539715	-0.338002	-0.173284	-0.0420259	-0.00592552	-0.00166155	0.00187496
1.438	-0.975902	-1.1049	-1.02835	-0.674759	-0.539987	-0.338729	-0.172793	-0.0426662	-0.00571893	0.000113229	0.00298185
1.439	-0.973218	-1.10339	-1.02586	-0.672665	-0.540774	-0.338892	-0.172651	-0.0430265	-0.00549448	0.00142748	0.00372743
1.44	-0.97028	-1.10156	-1.02352	-0.670617	-0.541795	-0.338625	-0.172984	-0.0431552	-0.00502298	0.00199857	0.00390196
1.441	-0.966921	-1.09949	-1.02122	-0.668802	-0.542552	-0.338112	-0.173935	-0.0431284	-0.00439286	0.00160428	0.00352585
1.442	-0.963221	-1.09728	-1.01889	-0.667274	-0.542574	-0.33727	-0.175401	-0.0431153	-0.00382376	0.000136419	0.00278521
1.443	-0.959354	-1.09485	-1.01656	-0.666046	-0.541733	-0.336021	-0.177063	-0.0432709	-0.00353353	-0.00239459	0.00180844
1.444	-0.955442	-1.09221	-1.01422	-0.665003	-0.540277	-0.334518	-0.178562	-0.0435737	-0.00378074	-0.0058883	0.000518974
1.445	-0.95161	-1.08955	-1.01185	-0.66389	-0.538551	-0.333075	-0.179685	-0.0438487	-0.00468757	-0.0100399	-0.00123281
1.446	-0.94799	-1.08699	-1.00949	-0.662546	-0.536784	-0.331965	-0.180466	-0.0439192	-0.0061574	-0.0143471	-0.00344205
1.447	-0.944638	-1.08445	-1.00711	-0.661029	-0.535087	-0.331243	-0.18096	-0.0437242	-0.00812115	-0.0183001	-0.0058308
1.448	-0.941527	-1.08188	-1.0046	-0.659455	-0.533522	-0.330828	-0.181029	-0.0433456	-0.0105592	-0.0214618	-0.00786147
1.449	-0.938614	-1.07929	-1.00191	-0.657829	-0.532196	-0.330697	-0.180498	-0.0428642	-0.0132963	-0.0234669	-0.00890582
1.45	-0.935918	-1.07677	-0.99919	-0.656092	-0.531291	-0.330846	-0.17936	-0.0422813	-0.0160247	-0.0241122	-0.00856848
1.451	-0.93347	-1.07458	-0.996669	-0.654194	-0.530933	-0.331174	-0.17777	-0.0416879	-0.0184189	-0.0235061	-0.0069033
1.452	-0.931279	-1.07276	-0.994377	-0.652108	-0.531033	-0.331532	-0.175934	-0.0412655	-0.020225	-0.0220069	-0.00431529
1.453	-0.92932	-1.07103	-0.992255	-0.649929	-0.531286	-0.331832	-0.17408	-0.04102	-0.0213861	-0.020005	-0.00130772
1.454	-0.92749	-1.06907	-0.990341	-0.647868	-0.531416	-0.331969	-0.17245	-0.0407775	-0.0219502	-0.0178109	0.0016921
1.455	-0.925661	-1.06675	-0.988603	-0.646039	-0.53148	-0.33174	-0.171248	-0.0404103	-0.0219144	-0.0157148	0.00439201
1.456	-0.923739	-1.0641	-0.986967	-0.644395	-0.531665	-0.330954	-0.170578	-0.0398349	-0.021355	-0.0140948	0.00668084
1.457	-0.9216	-1.06113	-0.985477	-0.642833	-0.531666	-0.329601	-0.170495	-0.0390226	-0.0204443	-0.0132103	0.00864578
1.458	-0.919083	-1.05799	-0.984151	-0.641286	-0.530882	-0.327815	-0.171021	-0.0381048	-0.0192501	-0.0129287	0.0104162
1.459	-0.916173	-1.05492	-0.982863	-0.639819	-0.529142	-0.325691	-0.171936	-0.0372017	-0.0177967	-0.0129755	0.012013
1.46	-0.913002	-1.05217	-0.981497	-0.638482	-0.526669	-0.323265	-0.172749	-0.0363521	-0.0162767	-0.0132184	0.0133818
1.461	-0.909665	-1.04981	-0.980043	-0.637093	-0.523774	-0.320718	-0.173032	-0.0356848	-0.0149436	-0.0135328	0.014408
1.462	-0.906252	-1.04771	-0.978577	-0.635466	-0.520771	-0.318391	-0.172753	-0.0353111	-0.0138643	-0.0137467	0.0149198
1.463	-0.902912	-1.04561	-0.977121	-0.633645	-0.51787	-0.316493	-0.172205	-0.0352077	-0.0129988	-0.0137959	0.0147801
1.464	-0.899754	-1.04341	-0.975532	-0.631753	-0.515137	-0.315029	-0.171676	-0.0353612	-0.0123759	-0.0137076	0.01397
1.465	-0.896845	-1.04115	-0.973634	-0.629833	-0.512641	-0.313963	-0.171121	-0.0356821	-0.0120447	-0.0134692	0.0126181
1.466	-0.894243	-1.03895	-0.971411	-0.627887	-0.510551	-0.313261	-0.170121	-0.035897	-0.0119513	-0.0130404	0.0108936
1.467	-0.891873	-1.03691	-0.969034	-0.625971	-0.508992	-0.31295	-0.168481	-0.0358552	-0.0120117	-0.0124097	0.00895453
1.468	-0.889437	-1.03512	-0.96675	-0.624176	-0.507906	-0.313092	-0.166527	-0.0356816	-0.0122805	-0.0116643	0.00706592
1.469	-0.886599	-1.03354	-0.964724	-0.622514	-0.507079	-0.313646	-0.164646	-0.0355458	-0.012871	-0.0110129	0.00559409
1.47	-0.8833	-1.03206	-0.963005	-0.620973	-0.506269	-0.314472	-0.16308	-0.0354292	-0.0137306	-0.0105428	0.00482635
1.471	-0.879758	-1.03052	-0.961524	-0.619566	-0.505375	-0.315358	-0.161976	-0.0350929	-0.0145208	-0.010132	0.00474247
1.472	-0.876185	-1.02889	-0.960122	-0.618273	-0.504405	-0.316023	-0.16134	-0.0343253	-0.0148343	-0.00974659	0.00504945
1.473	-0.872715	-1.02714	-0.958733	-0.617035	-0.503356	-0.316256	-0.16119	-0.0331602	-0.0145743	-0.0094923	0.00551313
1.474	-0.869438	-1.0253	-0.957391	-0.615855	-0.502337	-0.316103	-0.16161	-0.0317069	-0.0138688	-0.00942827	0.0060435
1.475	-0.866336	-1.02337	-0.956041	-0.614837	-0.501518	-0.315809	-0.162597	-0.0299856	-0.0128694	-0.00961354	0.00651232
1.476	-0.863309	-1.02131	-0.954534	-0.614031	-0.500899	-0.315601	-0.163993	-0.028094	-0.0117234	-0.0100305	0.00673801
1.477	-0.86029	-1.01913	-0.952733	-0.613348	-0.500339	-0.315467	-0.165438	-0.0263097	-0.010452	-0.0104407	0.00658503
1.478	-0.857285	-1.01693	-0.950605	-0.612642	-0.499679	-0.315113	-0.166522	-0.0250142	-0.00908729	-0.0106679	0.00596202
1.479	-0.854337	-1.01474	-0.948266	-0.611849	-0.498808	-0.314289	-0.167106	-0.0245886	-0.00783796	-0.0107855	0.00490555
1.48	-0.851488	-1.01242	-0.945885	-0.611056	-0.497767	-0.313068	-0.167355	-0.0252169	-0.00684707	-0.0109296	0.00367677
1.481	-0.84878	-1.00994	-0.943629	-0.610377	-0.496752	-0.311745	-0.167427	-0.0267335	-0.00607915	-0.0112098	0.00249219
1.482	-0.846242	-1.00743	-0.941674	-0.609828	-0.495969	-0.310636	-0.167244	-0.0287992	-0.00549201	-0.0116671	0.00132606
1.483	-0.843849	-1.00497	-0.940072	-0.609369	-0.495525	-0.309983	-0.166666	-0.0311338	-0.00509674	-0.0122224	0.000255682
1.484	-0.841559	-1.00259	-0.93868	-0.608939	-0.495418	-0.309925	-0.165672	-0.033461	-0.00496379	-0.012752	-0.000414819
1.485	-0.839379	-1.00033	-0.937334	-0.608391	-0.49563	-0.310497	-0.164386	-0.0355327	-0.00522388	-0.013104	-0.000473379
1.486	-0.837268	-0.998165	-0.935935	-0.607538	-0.496195	-0.311622	-0.163066	-0.0371739	-0.00591341	-0.013106	0.000148631
1.487	-0.835135	-0.996084	-0.934422	-0.606291	-0.497139	-0.312983	-0.161928	-0.0381341	-0.00684865	-0.012732	0.00140741
1.488	-0.83301	-0.994071	-0.93282	-0.604609	-0.498375	-0.314056	-0.16101	-0.0382057	-0.0077035	-0.0121715	0.00312772
1.489	-0.830962	-0.992117	-0.931181	-0.602558	-0.499748	-0.314534	-0.1603	-0.0374737	-0.00821793	-0.0116077	0.00511052
1.49	-0.828917	-0.990327	-0.92946	-0.600455	-0.501139	-0.31448	-0.159845	-0.0362159	-0.00839831	-0.0110484	0.00709472
1.491	-0.826749	-0.988752	-0.927604	-0.598675	-0.502516	-0.313972	-0.159744	-0.03468	-0.00843657	-0.0104951	0.00881396
1.492	-0.824384	-0.987326	-0.925705	-0.597353	-0.503917	-0.312973	-0.160142	-0.0330747	-0.00837924	-0.01009	0.0101667
1.493	-0.821705	-0.98602	-0.923898	-0.596401	-0.505302	-0.311464	-0.161138	-0.0316092	-0.00808808	-0.0100459	0.0110837
1.494	-0.818608	-0.984825	-0.92217	-0.59571	-0.506469	-0.309497	-0.162539	-0.0304507	-0.00749089	-0.0105796	0.0114364
1.495	-0.815168	-0.983646	-0.920392	-0.595218	-0.507196	-0.307327	-0.163902	-0.0297583	-0.00667449	-0.0117089	0.0111504
1.496	-0.811596	-0.982327	-0.91843	-0.594849	-0.507441	-0.305479	-0.164776	-0.0296699	-0.00583694	-0.0130747	0.0101718
1.497	-0.80816	-0.980752	-0.916212	-0.594521	-0.507304	-0.304316	-0.164862	-0.0301682	-0.00516865	-0.0142636	0.0083885
1.498	-0.805089	-0.978877	-0.913796	-0.594215	-0.506879	-0.303755	-0.164236	-0.0310648	-0.0048707	-0.0150814	0.00584282
1.499	-0.802477	-0.976795	-0.911404	-0.593959	-0.506273	-0.303585	-0.163292	-0.032078	-0.00530244	-0.0154153	0.00296266
1.5	-0.800356	-0.974667	-0.909343	-0.593773	-0.505659	-0.303677	-0.162363	-0.0329262	-0.00675714	-0.0153144	0.000364485
1.501	-0.798738	-0.972485	-0.907803	-0.593561	-0.505303	-0.303929	-0.161632	-0.0334476	-0.00901617	-0.014995	-0.00150917
1.502	-0.797555	-0.970111	-0.906713	-0.593156	-0.505508	-0.304338	-0.161223	-0.0337024	-0.0114	-0.0144282	-0.00255827
1.503	-0.796643	-0.967537	-0.905873	-0.59246	-0.506437	-0.304955	-0.161131	-0.0339705	-0.0134084	-0.0133127	-0.00290873
1.504	-0.795786	-0.964892	-0.905145	-0.591331	-0.508001	-0.305965	-0.161305	-0.0345184	-0.0150046	-0.0115364	-0.00262868
1.505	-0.794762	-0.962297	-0.904356	-0.589492	-0.509921	-0.307689	-0.161778	-0.0353414	-0.0162724	-0.00942097	-0.00171661
1.506	-0.793404	-0.959911	-0.903338	-0.58683	-0.511845	-0.309848	-0.162492	-0.0362001	-0.0173193	-0.00751294	-0.000281759
1.507	-0.791666	-0.957876	-0.902108	-0.583629	-0.513474	-0.311501	-0.163286	-0.0368166	-0.0183041	-0.00624489	0.00143648
1.508	-0.789563	-0.956213	-0.900728	-0.580386	-0.51461	-0.312005	-0.16406	-0.0370026	-0.0191711	-0.00579751	0.00309239
1.509	-0.787155	-0.954873	-0.899106	-0.577415	-0.515062	-0.311285	-0.164692	-0.0366855	-0.0196873	-0.00616302	0.00432065
1.51	-0.784586	-0.953771	-0.897086	-0.574685	-0.514624	-0.309569	-0.165076	-0.0359427	-0.0197786	-0.00726352	0.00497822
1.511	-0.781969	-0.95272	-0.894664	-0.572121	-0.513202	-0.307218	-0.165243	-0.0350338	-0.0195715	-0.00895513	0.00514295
1.512	-0.779352	-0.95153	-0.892047	-0.569848	-0.510878	-0.304513	-0.165234	-0.0342181	-0.0193041	-0.0110018	0.00483027
1.513	-0.776766	-0.95014	-0.889533	-0.568022	-0.507874	-0.301592	-0.164991	-0.0336139	-0.0192501	-0.013153	0.00404617
1.514	-0.774191	-0.948482	-0.887397	-0.566652	-0.504527	-0.298592	-0.164405	-0.0332254	-0.0195018	-0.0150713	0.00302322
1.515	-0.771632	-0.946391	-0.885781	-0.565644	-0.501167	-0.295762	-0.163403	-0.0329351	-0.0199507	-0.0162834	0.00207032
1.516	-0.769027	-0.943887	-0.88456	-0.564909	-0.498043	-0.293465	-0.161957	-0.0326777	-0.0205313	-0.0164088	0.00131279
1.517	-0.766151	-0.941259	-0.883491	-0.564373	-0.495318	-0.292125	-0.160095	-0.0325233	-0.0212849	-0.0153001	0.000790068
1.518	-0.762909	-0.938761	-0.882471	-0.563929	-0.49301	-0.291948	-0.157975	-0.0323807	-0.0222146	-0.0130267	0.000632842
1.519	-0.759525	-0.936455	-0.881461	-0.563434	-0.491061	-0.292652	-0.155914	-0.0319743	-0.0231404	-0.0098239	0.000938866
1.52	-0.756342	-0.934275	-0.880424	-0.562769	-0.489533	-0.293784	-0.154279	-0.0312061	-0.0237312	-0.00602037	0.00162785
1.521	-0.753627	-0.932172	-0.87936	-0.561843	-0.488598	-0.295101	-0.153222	-0.0302382	-0.0237427	-0.00203758	0.00244547
1.522	-0.751452	-0.930228	-0.878246	-0.560577	-0.488262	-0.296464	-0.152611	-0.0292948	-0.0231634	0.00161016	0.00313152
1.523	-0.749605	-0.928551	-0.877049	-0.55901	-0.488237	-0.297754	-0.152339	-0.0284916	-0.0221318	0.00443995	0.00368596
1.524	-0.747702	-0.927158	-0.875745	-0.557314	-0.488172	-0.298851	-0.1525	-0.0277534	-0.0207845	0.00616195	0.00430938
1.525	-0.745429	-0.925981	-0.87436	-0.555635	-0.487855	-0.299487	-0.153141	-0.0269302	-0.0192383	0.00673136	0.00516225
1.526	-0.742749	-0.924882	-0.872957	-0.554065	-0.487242	-0.299476	-0.154088	-0.0260061	-0.0176033	0.00627756	0.00627189
1.527	-0.739925	-0.923718	-0.871574	-0.55273	-0.486443	-0.298983	-0.154983	-0.0251111	-0.0159104	0.00506954	0.00744481
1.528	-0.737304	-0.922405	-0.870241	-0.551727	-0.485645	-0.298262	-0.155456	-0.0243531	-0.0142158	0.00343548	0.00828387
1.529	-0.73501	-0.920925	-0.868897	-0.550995	-0.484936	-0.297394	-0.155473	-0.0237889	-0.012681	0.00157884	0.0084667
1.53	-0.732858	-0.919335	-0.867339	-0.550392	-0.484218	-0.29639	-0.155329	-0.0235093	-0.0114321	-0.000341221	0.00807216
1.531	-0.730598	-0.917689	-0.865398	-0.549897	-0.483235	-0.295347	-0.155209	-0.0235457	-0.0105597	-0.00208356	0.00753192
1.532	-0.728147	-0.916015	-0.86316	-0.549669	-0.481842	-0.294508	-0.155024	-0.0237826	-0.0101515	-0.00348868	0.00716691
1.533	-0.725498	-0.914425	-0.86093	-0.549837	-0.48024	-0.294102	-0.154602	-0.0240745	-0.0102346	-0.00447351	0.00699981
1.534	-0.722694	-0.913126	-0.858935	-0.55026	-0.478701	-0.294163	-0.153863	-0.0243332	-0.010792	-0.00485412	0.00699035
1.535	-0.719942	-0.912219	-0.857186	-0.550653	-0.477264	-0.294673	-0.152907	-0.0245955	-0.0117414	-0.00444284	0.00709977
1.536	-0.717488	-0.911605	-0.85563	-0.55084	-0.475855	-0.295696	-0.151964	-0.0250552	-0.0129238	-0.00324868	0.00722981
1.537	-0.715441	-0.911131	-0.854258	-0.55073	-0.474482	-0.297082	-0.151182	-0.0257744	-0.0141771	-0.00150198	0.00729653
1.538	-0.713776	-0.910638	-0.853119	-0.550298	-0.47324	-0.298436	-0.150532	-0.0264834	-0.0152916	0.000448968	0.00731028
1.539	-0.712356	-0.909923	-0.852208	-0.549691	-0.472272	-0.299472	-0.149957	-0.0268872	-0.0159861	0.00223532	0.00739414
1.54	-0.710947	-0.908802	-0.851358	-0.549107	-0.471575	-0.300041	-0.149589	-0.0269749	-0.0161589	0.00348653	0.00770928
1.541	-0.7093	-0.907232	-0.850415	-0.548575	-0.470934	-0.299979	-0.1497	-0.0269549	-0.0159921	0.00386023	0.00829558
1.542	-0.707249	-0.905369	-0.849374	-0.547963	-0.470238	-0.299113	-0.150377	-0.026953	-0.0156358	0.00317684	0.00908352
1.543	-0.704794	-0.903344	-0.848233	-0.547102	-0.469643	-0.297385	-0.151394	-0.0268972	-0.0150081	0.00148065	0.0100682
1.544	-0.702067	-0.901176	-0.846908	-0.54592	-0.469311	-0.295005	-0.152475	-0.0268057	-0.0140427	-0.00101044	0.0112788
1.545	-0.699268	-0.898982	-0.845351	-0.544549	-0.469137	-0.292371	-0.153435	-0.0269019	-0.0129272	-0.00391221	0.0126466
1.546	-0.696664	-0.89693	-0.84365	-0.543266	-0.468812	-0.289791	-0.154191	-0.0273546	-0.0119775	-0.00681269	0.0139898
1.547	-0.694463	-0.895036	-0.841921	-0.542257	-0.468048	-0.287474	-0.1548	-0.0282174	-0.0114092	-0.00941449	0.0151211
1.548	-0.692619	-0.893284	-0.840126	-0.541518	-0.466728	-0.285737	-0.155206	-0.029495	-0.0112324	-0.0114323	0.0159689
1.549	-0.690853	-0.891789	-0.838111	-0.541009	-0.464966	-0.28483	-0.155115	-0.0310233	-0.0113264	-0.0126465	0.0164399
1.55	-0.688919	-0.890655	-0.835855	-0.540682	-0.463055	-0.284617	-0.154447	-0.0323761	-0.0116507	-0.0131201	0.0163767
1.551	-0.686823	-0.889744	-0.833561	-0.540337	-0.461319	-0.28482	-0.153613	-0.0330385	-0.0122675	-0.013053	0.0159129
1.552	-0.684769	-0.888781	-0.831517	-0.539635	-0.459915	-0.285383	-0.152994	-0.0327439	-0.0132259	-0.0124526	0.0155204
1.553	-0.682864	-0.887639	-0.829902	-0.538302	-0.458683	-0.286336	-0.152503	-0.031575	-0.01458	-0.0111943	0.015531
1.554	-0.681013	-0.886375	-0.828731	-0.536226	-0.457273	-0.287518	-0.151996	-0.0298019	-0.0162922	-0.0093593	0.0158524
1.555	-0.679118	-0.885023	-0.827964	-0.533437	-0.455486	-0.288665	-0.151565	-0.0277094	-0.0181254	-0.00729941	0.0161132
1.556	-0.677226	-0.883539	-0.827529	-0.530123	-0.453422	-0.289576	-0.151293	-0.0255147	-0.0198355	-0.00545706	0.0159884
1.557	-0.675416	-0.881943	-0.82729	-0.526605	-0.45129	-0.290116	-0.151215	-0.0234056	-0.0213433	-0.00418817	0.0154228
1.558	-0.673687	-0.880357	-0.827114	-0.523119	-0.449249	-0.290186	-0.151375	-0.0215153	-0.0226472	-0.00371173	0.0145224
1.559	-0.671969	-0.878927	-0.826946	-0.519815	-0.447367	-0.28979	-0.151703	-0.019911	-0.0236806	-0.00417774	0.01338
1.56	-0.670242	-0.877756	-0.826744	-0.516899	-0.445712	-0.289077	-0.152097	-0.018708	-0.0242657	-0.00548017	0.012056
1.561	-0.668526	-0.876811	-0.826318	-0.514629	-0.444327	-0.288173	-0.152528	-0.0180044	-0.0242475	-0.0071095	0.0106232
1.562	-0.66681	-0.875884	-0.825506	-0.513156	-0.44312	-0.287057	-0.152953	-0.0177348	-0.0237141	-0.00848758	0.00918646
1.563	-0.665066	-0.874754	-0.824462	-0.512426	-0.44202	-0.285804	-0.153243	-0.0178159	-0.0228567	-0.00929763	0.00787239
1.564	-0.663311	-0.873381	-0.823456	-0.51222	-0.441105	-0.28468	-0.153199	-0.0183205	-0.021682	-0.00942887	0.00688416
1.565	-0.66162	-0.871909	-0.822546	-0.512211	-0.440392	-0.283936	-0.152658	-0.0193254	-0.0201638	-0.00885914	0.00644546
1.566	-0.660025	-0.870516	-0.821625	-0.512059	-0.439708	-0.283809	-0.151587	-0.0207476	-0.0184805	-0.00769172	0.00665939
1.567	-0.658517	-0.869236	-0.820635	-0.511643	-0.438887	-0.284609	-0.15009	-0.0223762	-0.0169064	-0.00610397	0.0074916
1.568	-0.657153	-0.867951	-0.81966	-0.511119	-0.43797	-0.286303	-0.148335	-0.0238783	-0.0155982	-0.00415081	0.00878792
1.569	-0.656026	-0.866498	-0.818771	-0.510688	-0.437051	-0.288319	-0.146421	-0.0248486	-0.0145414	-0.00173447	0.0104143
1.57	-0.655074	-0.864789	-0.817921	-0.510395	-0.436072	-0.290117	-0.144358	-0.0250061	-0.013634	0.00113031	0.0123761
1.571	-0.654075	-0.862844	-0.817012	-0.510143	-0.434884	-0.291492	-0.142171	-0.0243294	-0.0128411	0.00415003	0.0145853
1.572	-0.652886	-0.860656	-0.815934	-0.509753	-0.433399	-0.292314	-0.139999	-0.0229241	-0.0122726	0.00694843	0.0167333
1.573	-0.651542	-0.858171	-0.814533	-0.509032	-0.431666	-0.292448	-0.138097	-0.0209293	-0.0119515	0.00936778	0.0185961
1.574	-0.650095	-0.855434	-0.812737	-0.507957	-0.429847	-0.291926	-0.13668	-0.018589	-0.0116019	0.0115222	0.0201085
1.575	-0.648563	-0.852638	-0.810729	-0.506687	-0.428042	-0.290933	-0.135777	-0.0161928	-0.0108822	0.0135321	0.0211191
1.576	-0.647022	-0.850063	-0.808803	-0.50539	-0.426203	-0.289631	-0.135385	-0.0140725	-0.0097401	0.0152682	0.021403
1.577	-0.645488	-0.847953	-0.807132	-0.504221	-0.424271	-0.288097	-0.135612	-0.0125458	-0.00840459	0.0164184	0.0208286
1.578	-0.643724	-0.846361	-0.805758	-0.503294	-0.422243	-0.286403	-0.136545	-0.0117592	-0.00710629	0.0167803	0.0194402
1.579	-0.641483	-0.845182	-0.804658	-0.502565	-0.420209	-0.284797	-0.138141	-0.0117794	-0.00600407	0.0164549	0.0175028
1.58	-0.638816	-0.84428	-0.803681	-0.501894	-0.418341	-0.283627	-0.1402	-0.0126618	-0.00530342	0.0157143	0.0154427
1.581	-0.635911	-0.843489	-0.802629	-0.501258	-0.416727	-0.28295	-0.14236	-0.0143177	-0.00519763	0.014684	0.0136579
1.582	-0.632953	-0.842609	-0.801419	-0.500786	-0.415403	-0.282512	-0.144208	-0.0164427	-0.00573767	0.0133941	0.0123535
1.583	-0.630214	-0.841582	-0.799995	-0.500646	-0.414418	-0.282153	-0.145403	-0.0185853	-0.00673293	0.0120917	0.011556
1.584	-0.627944	-0.840538	-0.798313	-0.500902	-0.413729	-0.281956	-0.145753	-0.0203681	-0.0078314	0.0110951	0.0111781
1.585	-0.62617	-0.839525	-0.79647	-0.501376	-0.413231	-0.282049	-0.145331	-0.0217527	-0.00881379	0.0106111	0.0110405
1.586	-0.624724	-0.838385	-0.794577	-0.501805	-0.412854	-0.282461	-0.144406	-0.0228988	-0.00961907	0.010821	0.0109707
1.587	-0.623401	-0.836969	-0.792721	-0.50207	-0.412564	-0.283036	-0.143294	-0.0238086	-0.0102421	0.0116342	0.0109173
1.588	-0.622097	-0.835244	-0.791031	-0.502109	-0.412364	-0.283467	-0.14234	-0.0244015	-0.0107494	0.0125959	0.0109703
1.589	-0.62081	-0.833268	-0.789606	-0.501815	-0.412248	-0.283442	-0.141839	-0.0247264	-0.0111838	0.0132336	0.0112504
1.59	-0.619468	-0.831195	-0.78851	-0.501122	-0.412134	-0.282676	-0.141902	-0.0248491	-0.0115272	0.0131363	0.011796
1.591	-0.617904	-0.829078	-0.787766	-0.500069	-0.411918	-0.281086	-0.142442	-0.0247772	-0.0117561	0.0119726	0.0125531
1.592	-0.616004	-0.826851	-0.787212	-0.498748	-0.411508	-0.279021	-0.143237	-0.0245427	-0.0117902	0.0097185	0.0133694
1.593	-0.613815	-0.824607	-0.786572	-0.49727	-0.410772	-0.276948	-0.14392	-0.0241346	-0.0115645	0.00661574	0.0140263
1.594	-0.611532	-0.822555	-0.785663	-0.495781	-0.409599	-0.275053	-0.144129	-0.0234876	-0.0111842	0.00295349	0.014325
1.595	-0.609358	-0.820767	-0.784436	-0.494395	-0.408044	-0.273363	-0.143845	-0.0225883	-0.010809	-0.000913467	0.0141236
1.596	-0.607437	-0.819223	-0.782929	-0.49318	-0.406339	-0.271905	-0.143297	-0.0215103	-0.0104984	-0.00455725	0.0133559
1.597	-0.605835	-0.817952	-0.781273	-0.492174	-0.404755	-0.270657	-0.142662	-0.0205301	-0.0102863	-0.00763304	0.0120919
1.598	-0.60446	-0.816937	-0.779611	-0.491383	-0.403502	-0.269632	-0.141967	-0.0201071	-0.0102749	-0.00981861	0.0105352
1.599	-0.603105	-0.816084	-0.778026	-0.490726	-0.40265	-0.268873	-0.141183	-0.0206015	-0.0106244	-0.0108125	0.00891397
1.6	-0.60161	-0.815296	-0.776574	-0.490122	-0.402102	-0.268321	-0.140434	-0.0220586	-0.0115001	-0.0107025	0.00737746
1.601	-0.599909	-0.814492	-0.775251	-0.48964	-0.401701	-0.267852	-0.139982	-0.0241102	-0.0129503	-0.00989005	0.0059222
1.602	-0.597936	-0.81364	-0.773977	-0.489378	-0.401341	-0.267373	-0.139903	-0.026185	-0.0147827	-0.00866874	0.00448792
1.603	-0.595727	-0.81274	-0.772749	-0.48927	-0.401017	-0.266846	-0.140069	-0.0278765	-0.0166679	-0.00726359	0.00319849
1.604	-0.59355	-0.81177	-0.771726	-0.489088	-0.400814	-0.266321	-0.140421	-0.0289621	-0.0182691	-0.00586273	0.00237019
1.605	-0.591755	-0.810699	-0.771054	-0.488573	-0.400795	-0.265871	-0.140918	-0.0293504	-0.0192717	-0.00455018	0.00225759
1.606	-0.590536	-0.809494	-0.770655	-0.487575	-0.400874	-0.265518	-0.141437	-0.0291517	-0.0195325	-0.00344822	0.00289119
1.607	-0.589759	-0.808139	-0.770376	-0.486088	-0.400789	-0.265303	-0.142032	-0.0286302	-0.0191357	-0.00269294	0.00412025
1.608	-0.589133	-0.80667	-0.770155	-0.484151	-0.400216	-0.265288	-0.142936	-0.0280152	-0.0182681	-0.0024383	0.00567459
1.609	-0.588499	-0.805157	-0.769854	-0.481831	-0.398964	-0.265391	-0.144134	-0.0273376	-0.0171167	-0.00297414	0.00719394
1.61	-0.587748	-0.803682	-0.769227	-0.479357	-0.397161	-0.265406	-0.145276	-0.0264718	-0.0157754	-0.00444281	0.00834535
1.611	-0.586698	-0.802348	-0.768133	-0.477069	-0.395174	-0.265146	-0.145977	-0.025315	-0.014281	-0.00652023	0.00896348
1.612	-0.585296	-0.801231	-0.766663	-0.475165	-0.393304	-0.264532	-0.146074	-0.0239453	-0.0127563	-0.00860102	0.00903268
1.613	-0.583684	-0.800333	-0.765089	-0.473665	-0.391678	-0.263672	-0.145687	-0.0227155	-0.0113762	-0.0101334	0.00865024
1.614	-0.58194	-0.799666	-0.763601	-0.472619	-0.390376	-0.262789	-0.145055	-0.0220336	-0.0103089	-0.0108217	0.00799305
1.615	-0.580012	-0.799243	-0.762214	-0.472103	-0.389433	-0.261954	-0.144211	-0.0219738	-0.00968211	-0.0107428	0.00724444
1.616	-0.577961	-0.79904	-0.760951	-0.47205	-0.388749	-0.261038	-0.142998	-0.0222639	-0.00943754	-0.0100984	0.00666084
1.617	-0.576012	-0.798968	-0.759875	-0.472209	-0.388166	-0.260066	-0.1414	-0.0225097	-0.00940606	-0.00881012	0.00649183
1.618	-0.574298	-0.798852	-0.758986	-0.472311	-0.387565	-0.259334	-0.139625	-0.0224132	-0.0095657	-0.00672384	0.00669271
1.619	-0.572729	-0.798539	-0.758222	-0.47221	-0.386841	-0.259093	-0.137936	-0.0219378	-0.00999344	-0.00403174	0.00704857
1.62	-0.571117	-0.797879	-0.757508	-0.471932	-0.385845	-0.259407	-0.136543	-0.0211559	-0.0105697	-0.00113152	0.0075082
1.621	-0.569388	-0.796762	-0.75673	-0.471576	-0.384444	-0.260255	-0.135507	-0.0200509	-0.0109391	0.00166992	0.00814159
1.622	-0.567628	-0.795276	-0.755819	-0.471123	-0.382675	-0.261486	-0.13478	-0.0186536	-0.0108137	0.00421303	0.0090586
1.623	-0.565877	-0.79361	-0.754837	-0.47051	-0.380735	-0.262776	-0.134323	-0.0170891	-0.0101061	0.00647739	0.0103321
1.624	-0.564017	-0.791878	-0.75389	-0.469809	-0.37877	-0.263809	-0.134134	-0.0154459	-0.00876507	0.00845567	0.0118641
1.625	-0.561975	-0.790095	-0.753111	-0.469172	-0.376859	-0.264519	-0.134214	-0.0137865	-0.0068171	0.0100148	0.0136097
1.626	-0.559814	-0.788223	-0.75257	-0.468643	-0.375117	-0.265094	-0.134538	-0.0121776	-0.00453982	0.0110269	0.0156677
1.627	-0.557641	-0.786292	-0.75211	-0.468091	-0.373691	-0.265676	-0.134986	-0.0107477	-0.00242922	0.0115294	0.0179235
1.628	-0.555533	-0.784329	-0.751449	-0.467438	-0.372722	-0.266226	-0.135352	-0.00976632	-0.000978732	0.0115883	0.0200153
1.629	-0.553486	-0.78229	-0.750423	-0.466722	-0.372239	-0.266611	-0.135469	-0.00951641	-0.000310648	0.011083	0.0216616
1.63	-0.551558	-0.780256	-0.749071	-0.465958	-0.372052	-0.266598	-0.135358	-0.0101258	-0.00021544	0.0098487	0.0227457
1.631	-0.549946	-0.77848	-0.747502	-0.465212	-0.371887	-0.266045	-0.135201	-0.0115364	-0.000573074	0.00802074	0.0232744
1.632	-0.54877	-0.777135	-0.745805	-0.464682	-0.371656	-0.265093	-0.135131	-0.013495	-0.00135004	0.00601497	0.0233953
1.633	-0.548014	-0.776192	-0.744047	-0.464479	-0.371509	-0.264042	-0.135004	-0.0156004	-0.00240227	0.00420806	0.0232944
1.634	-0.547562	-0.775556	-0.742369	-0.464429	-0.371608	-0.263269	-0.13443	-0.0175185	-0.00349563	0.00280445	0.0230512
1.635	-0.547199	-0.775068	-0.741003	-0.464249	-0.371922	-0.262982	-0.133269	-0.0192037	-0.00442663	0.00196864	0.0226185
1.636	-0.546714	-0.774481	-0.740057	-0.463822	-0.372251	-0.262989	-0.131879	-0.0207941	-0.00511685	0.00182329	0.0219291
1.637	-0.545973	-0.773619	-0.739442	-0.463242	-0.372426	-0.26297	-0.130772	-0.0222798	-0.00554839	0.00225536	0.0210606
1.638	-0.544895	-0.772462	-0.739073	-0.462684	-0.372523	-0.262866	-0.130362	-0.0234137	-0.00576244	0.00303561	0.0202389
1.639	-0.543407	-0.771059	-0.738841	-0.462256	-0.372752	-0.262758	-0.130801	-0.023949	-0.00594558	0.00402876	0.0196376
1.64	-0.541468	-0.769502	-0.73851	-0.461892	-0.373144	-0.262587	-0.131827	-0.0237967	-0.00622654	0.00504831	0.0193221
1.641	-0.539155	-0.767868	-0.7379	-0.461488	-0.373575	-0.262199	-0.133034	-0.02305	-0.0064621	0.00573156	0.0193885
1.642	-0.536671	-0.766221	-0.737073	-0.46108	-0.373999	-0.261503	-0.134247	-0.0219998	-0.00645859	0.00570084	0.0199122
1.643	-0.534227	-0.76471	-0.736276	-0.460796	-0.37436	-0.260448	-0.135433	-0.0209106	-0.00623018	0.0047045	0.0206861
1.644	-0.531972	-0.763512	-0.735657	-0.460663	-0.374551	-0.258954	-0.136494	-0.0199315	-0.00589018	0.00261418	0.0212051
1.645	-0.530009	-0.762679	-0.735054	-0.460555	-0.374614	-0.257033	-0.137338	-0.019264	-0.00551071	-0.000424	0.0210306
1.646	-0.528384	-0.762108	-0.734224	-0.460367	-0.37465	-0.254962	-0.137932	-0.0190627	-0.00518489	-0.00393472	0.0201265
1.647	-0.527108	-0.761654	-0.733153	-0.460084	-0.374569	-0.253182	-0.13828	-0.0193334	-0.00510289	-0.00733536	0.0188441
1.648	-0.526136	-0.761275	-0.732033	-0.459833	-0.37421	-0.251978	-0.138377	-0.0200311	-0.00554908	-0.0101412	0.0175985
1.649	-0.525267	-0.761034	-0.731077	-0.45984	-0.373557	-0.251305	-0.138119	-0.0211507	-0.00679259	-0.0121426	0.0165829
1.65	-0.524244	-0.760954	-0.730376	-0.4601	-0.372732	-0.250897	-0.13739	-0.0226952	-0.00890678	-0.0133417	0.0158078
1.651	-0.522937	-0.760916	-0.729866	-0.460281	-0.371995	-0.250443	-0.136278	-0.0244992	-0.01172	-0.0136947	0.0152495
1.652	-0.521426	-0.760757	-0.72948	-0.459995	-0.371573	-0.249679	-0.134964	-0.0262133	-0.0149814	-0.013066	0.0148791
1.653	-0.51992	-0.760318	-0.729143	-0.459002	-0.371405	-0.248552	-0.133556	-0.0274874	-0.0184364	-0.0113681	0.0146718
1.654	-0.51858	-0.75941	-0.728649	-0.457367	-0.371263	-0.247284	-0.13213	-0.0281244	-0.0216438	-0.00870466	0.0146344
1.655	-0.517451	-0.757944	-0.727822	-0.455466	-0.371009	-0.24616	-0.130732	-0.0281385	-0.0240659	-0.00540025	0.0148293
1.656	-0.516519	-0.75608	-0.726632	-0.453582	-0.37059	-0.24532	-0.129423	-0.0276578	-0.0254291	-0.00187552	0.015306
1.657	-0.515729	-0.754172	-0.725091	-0.451644	-0.369981	-0.244773	-0.128494	-0.0268393	-0.0257398	0.00148999	0.0159013
1.658	-0.514947	-0.75246	-0.723253	-0.449464	-0.36914	-0.244469	-0.128336	-0.025846	-0.0251434	0.00434547	0.0162658
1.659	-0.514009	-0.750884	-0.721258	-0.447023	-0.367945	-0.244301	-0.12899	-0.0247447	-0.0238349	0.00632957	0.0161664
1.66	-0.512868	-0.749266	-0.719322	-0.444531	-0.366337	-0.244117	-0.130065	-0.0235518	-0.0220001	0.00721441	0.0155954
1.661	-0.511574	-0.747536	-0.717644	-0.442277	-0.364537	-0.243736	-0.131035	-0.0223975	-0.0198881	0.00702487	0.0146109
1.662	-0.510176	-0.745788	-0.716276	-0.440377	-0.362857	-0.242962	-0.13159	-0.0214684	-0.0177882	0.00593446	0.0132779
1.663	-0.508672	-0.744235	-0.715151	-0.438806	-0.36138	-0.241723	-0.131845	-0.0208219	-0.0159085	0.00417116	0.0118492
1.664	-0.507036	-0.743022	-0.714188	-0.43766	-0.359991	-0.240153	-0.132042	-0.0203879	-0.0143295	0.00201739	0.0107566
1.665	-0.505325	-0.742099	-0.713365	-0.437107	-0.358616	-0.238544	-0.132126	-0.0201659	-0.0130236	-0.0001928	0.0102687
1.666	-0.503694	-0.741335	-0.71272	-0.437134	-0.357335	-0.237267	-0.131884	-0.0201985	-0.0118404	-0.00211942	0.0103845
1.667	-0.502235	-0.740629	-0.712233	-0.437601	-0.356279	-0.236639	-0.131221	-0.020407	-0.0105703	-0.00360836	0.0110083
1.668	-0.500895	-0.739868	-0.711816	-0.438406	-0.355521	-0.236728	-0.130126	-0.0206693	-0.00923172	-0.00474609	0.0120432
1.669	-0.499621	-0.738951	-0.711366	-0.439411	-0.355137	-0.237347	-0.128684	-0.0208664	-0.00807775	-0.00549251	0.0134616
1.67	-0.49847	-0.737874	-0.710686	-0.44029	-0.355213	-0.238237	-0.127088	-0.0209762	-0.00727075	-0.00551836	0.0152602
1.671	-0.497469	-0.73667	-0.709629	-0.440673	-0.355728	-0.23914	-0.125507	-0.021236	-0.00675829	-0.00465635	0.0173036
1.672	-0.496554	-0.735313	-0.708346	-0.440449	-0.356503	-0.23988	-0.124021	-0.0218753	-0.00635913	-0.00319344	0.0193621
1.673	-0.495758	-0.733728	-0.707112	-0.439695	-0.357259	-0.240492	-0.122745	-0.0227211	-0.00595604	-0.001604	0.0212229
1.674	-0.495144	-0.731888	-0.70608	-0.438509	-0.357789	-0.24106	-0.121917	-0.0232315	-0.00557406	-0.0002091	0.0226972
1.675	-0.494572	-0.729977	-0.705375	-0.437048	-0.357984	-0.241532	-0.121772	-0.0230188	-0.00516976	0.00087338	0.0236656
1.676	-0.493874	-0.72823	-0.705049	-0.435514	-0.357643	-0.241731	-0.122336	-0.0222668	-0.00459579	0.0015202	0.0241547
1.677	-0.492981	-0.726647	-0.704959	-0.434048	-0.356579	-0.241437	-0.123296	-0.0214591	-0.00391332	0.00158767	0.024276
1.678	-0.491843	-0.725083	-0.70501	-0.432706	-0.354885	-0.240732	-0.124178	-0.0208753	-0.00342165	0.0012014	0.0240915
1.679	-0.490508	-0.723481	-0.705218	-0.43157	-0.352924	-0.240095	-0.124786	-0.0204779	-0.00323617	0.000797414	0.0235356
1.68	-0.489062	-0.721959	-0.705475	-0.43081	-0.35109	-0.23977	-0.125241	-0.0202161	-0.00319668	0.000696993	0.0225256
1.681	-0.487519	-0.720746	-0.705557	-0.430529	-0.349629	-0.23949	-0.125614	-0.0201948	-0.00318073	0.000858962	0.0211723
1.682	-0.485906	-0.719948	-0.705219	-0.430701	-0.348664	-0.239036	-0.125746	-0.0205116	-0.00312037	0.00114106	0.0197082
1.683	-0.484342	-0.719424	-0.704338	-0.431346	-0.348231	-0.238593	-0.125361	-0.0211804	-0.0028576	0.00151132	0.0182839
1.684	-0.48298	-0.719042	-0.7031	-0.432516	-0.348251	-0.2385	-0.124408	-0.0221345	-0.00226049	0.00200981	0.0170328
1.685	-0.481876	-0.718894	-0.701763	-0.434094	-0.348554	-0.238814	-0.123284	-0.0232113	-0.00142853	0.00259945	0.0161721
1.686	-0.480917	-0.719037	-0.700388	-0.435851	-0.34892	-0.239228	-0.122533	-0.0242091	-0.000690832	0.00310903	0.0159212
1.687	-0.479948	-0.719354	-0.698971	-0.437577	-0.349158	-0.239466	-0.122476	-0.0249748	-0.00039304	0.00343904	0.016409
1.688	-0.478948	-0.719657	-0.697504	-0.439069	-0.349269	-0.239549	-0.123146	-0.0253776	-0.000696216	0.00363064	0.0175601
1.689	-0.477961	-0.719693	-0.695893	-0.440168	-0.349487	-0.239615	-0.12428	-0.0252584	-0.00159063	0.00365715	0.0190336
1.69	-0.476969	-0.719253	-0.694091	-0.440817	-0.349978	-0.239678	-0.1255	-0.0244985	-0.00302607	0.00331928	0.0203194
1.691	-0.47591	-0.718346	-0.692247	-0.441054	-0.350623	-0.239624	-0.126615	-0.0230465	-0.00485112	0.00240546	0.0209865
1.692	-0.474743	-0.717172	-0.690621	-0.440955	-0.351148	-0.239288	-0.12762	-0.0209281	-0.00669473	0.000961034	0.0210324
1.693	-0.47349	-0.715973	-0.689397	-0.440495	-0.351296	-0.238477	-0.128606	-0.0183477	-0.00817021	-0.000703946	0.0208263
1.694	-0.472156	-0.714898	-0.688648	-0.439591	-0.351023	-0.237123	-0.129665	-0.0157317	-0.00913892	-0.00228972	0.0206699
1.695	-0.470715	-0.713927	-0.688401	-0.438338	-0.350477	-0.235508	-0.130645	-0.0135276	-0.00968002	-0.00366977	0.0206173
1.696	-0.469237	-0.712949	-0.688589	-0.436943	-0.349708	-0.234089	-0.131249	-0.0119433	-0.00996195	-0.00486483	0.0205146
1.697	-0.467864	-0.711925	-0.688989	-0.435496	-0.348639	-0.233091	-0.131439	-0.0110424	-0.0101433	-0.00583514	0.0201598
1.698	-0.466678	-0.710868	-0.689353	-0.43397	-0.347248	-0.232434	-0.131406	-0.0109133	-0.0103549	-0.00630892	0.0195912
1.699	-0.465688	-0.709763	-0.689539	-0.432303	-0.34563	-0.231868	-0.131148	-0.0115017	-0.0107642	-0.00603502	0.0190703
1.7	-0.464864	-0.708629	-0.689476	-0.430481	-0.343934	-0.231253	-0.130423	-0.0124915	-0.0114612	-0.00505712	0.0187827
1.701	-0.464175	-0.707566	-0.689072	-0.428673	-0.342293	-0.230767	-0.129174	-0.0134598	-0.0122728	-0.00360831	0.0187284
1.702	-0.463567	-0.706647	-0.688296	-0.427175	-0.340831	-0.230585	-0.127673	-0.0141034	-0.0129136	-0.00198355	0.0188773
1.703	-0.462899	-0.705852	-0.687342	-0.426095	-0.339623	-0.230611	-0.126337	-0.0143928	-0.0132476	-0.000463921	0.0193117
1.704	-0.462027	-0.705106	-0.686523	-0.425257	-0.338602	-0.230659	-0.125549	-0.0144533	-0.0132913	0.000853804	0.0201377
1.705	-0.460908	-0.704337	-0.685957	-0.42446	-0.337616	-0.230581	-0.125448	-0.0142036	-0.0131506	0.00201448	0.0213323
1.706	-0.459586	-0.703474	-0.685407	-0.423565	-0.336565	-0.230395	-0.125875	-0.0133455	-0.0129506	0.00302147	0.0227432
1.707	-0.458193	-0.702428	-0.684585	-0.422467	-0.335483	-0.230332	-0.126531	-0.0118554	-0.0126599	0.00378162	0.0241648
1.708	-0.456891	-0.701193	-0.683485	-0.421212	-0.334487	-0.230482	-0.1271	-0.0101209	-0.0120738	0.00407641	0.0254124
1.709	-0.455711	-0.699919	-0.682249	-0.419969	-0.333648	-0.230638	-0.127383	-0.00852131	-0.0111	0.00371992	0.0264195
1.71	-0.454547	-0.698825	-0.680929	-0.418799	-0.332926	-0.230547	-0.127427	-0.00719604	-0.00990065	0.00287545	0.0272224
1.711	-0.453309	-0.698017	-0.679494	-0.417608	-0.33224	-0.230027	-0.127412	-0.00615024	-0.00873862	0.00204383	0.027746
1.712	-0.451995	-0.697395	-0.677963	-0.416303	-0.33163	-0.229059	-0.127363	-0.0054434	-0.00788632	0.00170477	0.0277949
1.713	-0.45063	-0.696759	-0.676482	-0.41492	-0.331293	-0.227933	-0.127016	-0.00525877	-0.00751103	0.00206978	0.0273242
1.714	-0.449257	-0.695907	-0.675239	-0.413602	-0.331334	-0.227092	-0.126118	-0.00572375	-0.00753911	0.00304461	0.0264724
1.715	-0.447898	-0.694735	-0.674292	-0.41248	-0.331625	-0.226733	-0.124808	-0.00671179	-0.00781355	0.00428234	0.0254395
1.716	-0.446605	-0.693295	-0.673566	-0.41161	-0.331943	-0.226813	-0.12342	-0.00792183	-0.00827774	0.00548624	0.0244911
1.717	-0.445557	-0.691673	-0.672979	-0.410958	-0.332135	-0.227306	-0.122125	-0.00908032	-0.00892425	0.00668922	0.0238605
1.718	-0.444916	-0.68989	-0.672423	-0.410397	-0.332086	-0.228172	-0.121036	-0.00998119	-0.00971698	0.00808041	0.0235842
1.719	-0.444613	-0.68795	-0.67176	-0.409823	-0.331645	-0.229305	-0.120358	-0.0104991	-0.0104842	0.00982465	0.023589
1.72	-0.444363	-0.685878	-0.670959	-0.409257	-0.330761	-0.230591	-0.120113	-0.0105405	-0.0109059	0.0120878	0.0239194
1.721	-0.443861	-0.683801	-0.670057	-0.40874	-0.329579	-0.231791	-0.119886	-0.00996381	-0.0107602	0.0148983	0.024666
1.722	-0.442931	-0.681981	-0.669014	-0.4082	-0.328314	-0.232519	-0.119139	-0.00873134	-0.0100124	0.0180588	0.0257258
1.723	-0.441611	-0.680686	-0.667785	-0.407462	-0.327048	-0.232499	-0.117772	-0.00695475	-0.00870212	0.0213509	0.026778
1.724	-0.440097	-0.680017	-0.666539	-0.406375	-0.325719	-0.231736	-0.116195	-0.00476369	-0.00690847	0.0246642	0.0274438
1.725	-0.438608	-0.67985	-0.665564	-0.404968	-0.324313	-0.230485	-0.114911	-0.00231905	-0.00472498	0.0278714	0.0275585
1.726	-0.43728	-0.679881	-0.664981	-0.403437	-0.322928	-0.229088	-0.114275	0.000154718	-0.00228612	0.0306156	0.0272166
1.727	-0.436136	-0.679752	-0.664716	-0.402048	-0.321738	-0.227864	-0.114441	0.00235505	0.000160671	0.0322849	0.0265491
1.728	-0.435052	-0.679332	-0.664639	-0.401045	-0.320913	-0.227158	-0.115281	0.00386314	0.00236318	0.032468	0.025626
1.729	-0.433873	-0.678821	-0.664678	-0.400587	-0.320552	-0.227228	-0.116375	0.00433724	0.00415061	0.0312748	0.0244849
1.73	-0.432623	-0.67849	-0.664762	-0.400737	-0.320663	-0.227941	-0.11719	0.00374607	0.00535428	0.0289884	0.0231648
1.731	-0.431494	-0.678389	-0.664743	-0.401381	-0.321116	-0.228858	-0.117464	0.00228937	0.00590199	0.0259521	0.0217966
1.732	-0.430645	-0.678261	-0.664511	-0.402247	-0.321668	-0.229564	-0.117281	0.000297681	0.00589751	0.0228192	0.020658
1.733	-0.430088	-0.677752	-0.664102	-0.403062	-0.322155	-0.229776	-0.116782	-0.0018462	0.00540783	0.0202815	0.0199881
1.734	-0.429703	-0.676739	-0.663567	-0.40367	-0.322593	-0.229397	-0.116106	-0.00387577	0.00442718	0.0186524	0.0197705
1.735	-0.429327	-0.675355	-0.662849	-0.404112	-0.323091	-0.228657	-0.115453	-0.00562127	0.00311896	0.0179623	0.0198115
1.736	-0.4289	-0.673801	-0.661888	-0.404555	-0.323709	-0.22794	-0.114871	-0.00691265	0.00180704	0.0182053	0.0199277
1.737	-0.42849	-0.672241	-0.660757	-0.405132	-0.324371	-0.227385	-0.114244	-0.00759842	0.000746368	0.0193135	0.0200272
1.738	-0.428119	-0.67076	-0.659579	-0.405865	-0.324863	-0.226936	-0.113606	-0.00760092	2.27e-05	0.0210418	0.0201867
1.739	-0.427674	-0.669379	-0.658377	-0.406572	-0.324948	-0.226585	-0.113147	-0.0070632	-0.000457772	0.0228926	0.0205348
1.74	-0.426922	-0.668115	-0.657107	-0.406915	-0.324493	-0.226309	-0.113049	-0.00637185	-0.000895792	0.0241355	0.0209699
1.741	-0.425546	-0.667018	-0.655828	-0.406655	-0.323532	-0.226019	-0.113523	-0.00582103	-0.00143807	0.0242097	0.0212793
1.742	-0.423463	-0.666101	-0.654644	-0.405844	-0.322199	-0.225591	-0.114621	-0.00546137	-0.00208802	0.0230836	0.0214043
1.743	-0.420998	-0.665281	-0.653619	-0.404763	-0.320593	-0.22489	-0.116121	-0.00536885	-0.00273667	0.0210315	0.0213648
1.744	-0.418497	-0.664531	-0.65286	-0.403717	-0.318791	-0.223981	-0.117833	-0.00571987	-0.00321517	0.0183939	0.0211687
1.745	-0.416052	-0.663954	-0.652481	-0.402912	-0.316958	-0.223128	-0.119573	-0.00660682	-0.00336428	0.0156251	0.0208313
1.746	-0.413728	-0.66357	-0.652509	-0.402301	-0.315229	-0.222414	-0.120958	-0.00794914	-0.00321038	0.0130854	0.020428
1.747	-0.411703	-0.663234	-0.652849	-0.401607	-0.313608	-0.221683	-0.121629	-0.0095413	-0.00304822	0.0108065	0.0201982
1.748	-0.410057	-0.662825	-0.653238	-0.400691	-0.312167	-0.220805	-0.121557	-0.0112698	-0.00329425	0.00874889	0.0203803
1.749	-0.408676	-0.662328	-0.653373	-0.399699	-0.311106	-0.21981	-0.120903	-0.0133038	-0.00424226	0.00703502	0.020857
1.75	-0.407513	-0.661702	-0.653099	-0.398775	-0.310606	-0.21893	-0.119679	-0.0158702	-0.00586181	0.00583422	0.0212343
1.751	-0.406683	-0.660825	-0.652471	-0.397959	-0.310744	-0.218389	-0.117926	-0.018833	-0.00778708	0.00533187	0.0212705
1.752	-0.406241	-0.659624	-0.65163	-0.397261	-0.311436	-0.218026	-0.11602	-0.0216652	-0.00954562	0.00572503	0.0210334
1.753	-0.40611	-0.658182	-0.650626	-0.396572	-0.312369	-0.217418	-0.114483	-0.0238059	-0.010864	0.00698872	0.0207823
1.754	-0.406116	-0.656681	-0.64944	-0.395593	-0.313128	-0.216321	-0.113666	-0.0249263	-0.011729	0.00874148	0.0208475
1.755	-0.406105	-0.655303	-0.648128	-0.39409	-0.313476	-0.21483	-0.113533	-0.024893	-0.0122484	0.0105187	0.0214789
1.756	-0.406059	-0.65412	-0.646781	-0.392146	-0.313403	-0.213292	-0.113766	-0.023721	-0.0124734	0.012121	0.0226665
1.757	-0.405961	-0.653018	-0.645425	-0.390076	-0.313073	-0.212036	-0.114197	-0.0216618	-0.0122813	0.0135321	0.0240887
1.758	-0.405729	-0.651879	-0.644047	-0.388245	-0.312726	-0.211118	-0.114953	-0.0190645	-0.0114827	0.0146957	0.0252917
1.759	-0.405362	-0.650735	-0.64268	-0.386914	-0.312428	-0.210465	-0.116142	-0.0161295	-0.00998855	0.0155625	0.0259582
1.76	-0.404892	-0.649646	-0.641381	-0.386051	-0.312052	-0.210086	-0.117636	-0.0129108	-0.00790943	0.0161741	0.0260353
1.761	-0.404303	-0.648608	-0.640144	-0.385441	-0.311451	-0.210028	-0.119187	-0.00946141	-0.00549397	0.0166135	0.0256797
1.762	-0.403628	-0.647589	-0.638948	-0.384937	-0.310567	-0.210308	-0.120514	-0.00606092	-0.00299427	0.016864	0.0250634
1.763	-0.402987	-0.646613	-0.637796	-0.384485	-0.309441	-0.210964	-0.121426	-0.0032737	-0.000709769	0.0168404	0.0242499
1.764	-0.402472	-0.645744	-0.636695	-0.384094	-0.308149	-0.212064	-0.121932	-0.00159616	0.00109871	0.0167048	0.023333
1.765	-0.402053	-0.644961	-0.63573	-0.383796	-0.306736	-0.213568	-0.122089	-0.00117065	0.00244384	0.0169086	0.0225753
1.766	-0.401596	-0.644162	-0.634982	-0.383539	-0.305196	-0.215223	-0.121907	-0.00181801	0.00348549	0.0178409	0.0222896
1.767	-0.400996	-0.643314	-0.634408	-0.383251	-0.303603	-0.2167	-0.121327	-0.00313193	0.00425902	0.0196334	0.0226705
1.768	-0.400334	-0.642485	-0.633982	-0.38298	-0.302158	-0.217725	-0.120205	-0.0047205	0.00471283	0.0222353	0.0237817
1.769	-0.399694	-0.641761	-0.633721	-0.382839	-0.301072	-0.218146	-0.118587	-0.00637889	0.00475974	0.0255058	0.0255884
1.77	-0.399024	-0.641242	-0.633603	-0.382926	-0.300466	-0.217989	-0.116843	-0.0079281	0.0042705	0.0291521	0.0279291
1.771	-0.398362	-0.641054	-0.633571	-0.383172	-0.300308	-0.217358	-0.115298	-0.00917415	0.00323044	0.0327062	0.0305213
1.772	-0.397862	-0.641227	-0.633501	-0.383288	-0.300484	-0.216324	-0.114078	-0.00999995	0.00184456	0.0357419	0.0329917
1.773	-0.397499	-0.64156	-0.633227	-0.383053	-0.300807	-0.214983	-0.113149	-0.0103364	0.000481598	0.0380135	0.0349049
1.774	-0.397032	-0.641745	-0.63266	-0.382484	-0.300936	-0.213502	-0.112321	-0.0101754	-0.000534046	0.0393225	0.0359124
1.775	-0.396272	-0.641694	-0.631809	-0.381719	-0.300575	-0.212124	-0.111551	-0.00959437	-0.00107519	0.0394485	0.0359718
1.776	-0.395229	-0.641562	-0.630728	-0.380945	-0.299735	-0.211046	-0.110945	-0.00874167	-0.0011108	0.0383051	0.0353421
1.777	-0.393969	-0.641435	-0.629517	-0.380354	-0.298656	-0.210193	-0.110352	-0.0078707	-0.00065108	0.0361144	0.0343016
1.778	-0.392486	-0.641232	-0.628295	-0.380053	-0.297646	-0.209381	-0.109383	-0.00726818	0.000239583	0.0334262	0.0329637
1.779	-0.39079	-0.640858	-0.627146	-0.380044	-0.296918	-0.208621	-0.10788	-0.00706077	0.00146665	0.0307883	0.0313969
1.78	-0.38904	-0.640228	-0.626185	-0.380286	-0.29647	-0.208192	-0.106135	-0.00719724	0.00285064	0.0283284	0.0297492
1.781	-0.387497	-0.639276	-0.625553	-0.38075	-0.296309	-0.208449	-0.104643	-0.00756392	0.00410251	0.0259409	0.0280967
1.782	-0.386351	-0.638016	-0.625239	-0.381421	-0.296553	-0.20949	-0.103803	-0.00797955	0.0049391	0.0237333	0.0263602
1.783	-0.385607	-0.636565	-0.625136	-0.382233	-0.297189	-0.211083	-0.103881	-0.00824653	0.00521311	0.0219189	0.0246192
1.784	-0.385154	-0.63503	-0.625219	-0.383017	-0.298109	-0.212989	-0.104898	-0.0083622	0.00493778	0.0205672	0.0232782
1.785	-0.384877	-0.633376	-0.625441	-0.383572	-0.299193	-0.215091	-0.106448	-0.00851636	0.00423753	0.0197136	0.0226737
1.786	-0.384647	-0.63156	-0.625623	-0.383813	-0.300237	-0.217174	-0.107981	-0.00890096	0.00321144	0.0193628	0.0226852
1.787	-0.384301	-0.629613	-0.625625	-0.383806	-0.301039	-0.218841	-0.109326	-0.0095892	0.00191718	0.0193874	0.0229327
1.788	-0.383721	-0.627629	-0.625424	-0.383671	-0.301541	-0.219691	-0.1107	-0.0104376	0.000562364	0.0195985	0.0231913
1.789	-0.382944	-0.625787	-0.624981	-0.383466	-0.301769	-0.21957	-0.112269	-0.0111477	-0.00053683	0.0197731	0.0233559
1.79	-0.382135	-0.624259	-0.62425	-0.383122	-0.301698	-0.218608	-0.113956	-0.011537	-0.00116575	0.0197234	0.0233501
1.791	-0.381423	-0.623148	-0.623308	-0.382541	-0.301258	-0.217039	-0.115572	-0.0116644	-0.00121839	0.0193401	0.0232631
1.792	-0.38085	-0.622485	-0.622302	-0.381785	-0.300408	-0.215061	-0.116866	-0.0116712	-0.000688955	0.0184528	0.0232036
1.793	-0.380397	-0.622143	-0.62134	-0.381077	-0.299242	-0.212944	-0.117745	-0.0116191	0.000253676	0.0168453	0.0231384
1.794	-0.379921	-0.621926	-0.620513	-0.380615	-0.298032	-0.211165	-0.118475	-0.0114614	0.00136086	0.0144814	0.0230521
1.795	-0.379207	-0.621761	-0.619948	-0.380379	-0.297059	-0.210228	-0.119297	-0.0111323	0.0025263	0.011687	0.0230152
1.796	-0.378243	-0.621679	-0.619758	-0.380089	-0.296478	-0.210254	-0.120079	-0.0107233	0.00378041	0.00907203	0.0231702
1.797	-0.377212	-0.621719	-0.619892	-0.379471	-0.296332	-0.210874	-0.120637	-0.0104362	0.00502078	0.00720069	0.0236114
1.798	-0.376134	-0.621905	-0.620082	-0.378511	-0.296582	-0.211511	-0.120995	-0.0103504	0.00592606	0.006331	0.0240043
1.799	-0.374841	-0.622236	-0.620003	-0.377387	-0.297077	-0.211745	-0.121181	-0.0104755	0.00618327	0.00639681	0.0237509
1.8	-0.373238	-0.622626	-0.619532	-0.376258	-0.297616	-0.211499	-0.121224	-0.01087	0.00568144	0.00724267	0.0227038
1.801	-0.371436	-0.622874	-0.618804	-0.375139	-0.298146	-0.211062	-0.121296	-0.0115052	0.00455301	0.00885312	0.0212848
1.802	-0.369692	-0.622787	-0.617962	-0.373966	-0.298739	-0.210758	-0.121554	-0.0122629	0.003064	0.011242	0.0201044
1.803	-0.368256	-0.622315	-0.616977	-0.372748	-0.299385	-0.210558	-0.121972	-0.0130463	0.00147968	0.0142415	0.0196891
1.804	-0.367282	-0.621502	-0.615788	-0.371616	-0.299969	-0.210245	-0.122393	-0.013701	5.73e-05	0.0174703	0.0202701
1.805	-0.366809	-0.620379	-0.614465	-0.370713	-0.300353	-0.209694	-0.12269	-0.0140215	-0.000992527	0.0204239	0.0216969
1.806	-0.366688	-0.619018	-0.613086	-0.37002	-0.300368	-0.208849	-0.122757	-0.0139324	-0.00155017	0.0226255	0.0235911
1.807	-0.366645	-0.61759	-0.611663	-0.369386	-0.299826	-0.207692	-0.12256	-0.0134841	-0.00155381	0.0237718	0.02553
1.808	-0.366534	-0.616216	-0.61026	-0.368663	-0.298717	-0.206216	-0.122296	-0.0127178	-0.000982378	0.0237877	0.0272449
1.809	-0.366384	-0.614878	-0.608924	-0.367795	-0.29724	-0.204519	-0.122152	-0.0117901	6.61e-05	0.0227888	0.0287238
1.81	-0.366275	-0.61356	-0.607652	-0.366968	-0.295593	-0.202832	-0.122088	-0.0109677	0.00125157	0.0211149	0.0299651
1.811	-0.366227	-0.612292	-0.606524	-0.366501	-0.293959	-0.201282	-0.121947	-0.0102941	0.00207749	0.0192942	0.0308051
1.812	-0.366139	-0.611001	-0.60564	-0.36646	-0.292574	-0.199794	-0.12149	-0.00963289	0.00226474	0.0178066	0.0310952
1.813	-0.365851	-0.609532	-0.604985	-0.366655	-0.291677	-0.198303	-0.120394	-0.00893628	0.00198653	0.0170519	0.0308165
1.814	-0.365277	-0.60795	-0.604433	-0.366891	-0.291366	-0.196837	-0.118452	-0.00823295	0.00161099	0.0173685	0.0299756
1.815	-0.364432	-0.606548	-0.603913	-0.367091	-0.291556	-0.195571	-0.115839	-0.00754431	0.00134843	0.0187217	0.0285604
1.816	-0.36342	-0.605537	-0.603499	-0.367293	-0.292199	-0.194939	-0.113061	-0.00685881	0.00122405	0.0206378	0.0266822
1.817	-0.362371	-0.604866	-0.603243	-0.367448	-0.293365	-0.195268	-0.11062	-0.00610824	0.00113586	0.0226262	0.0246833
1.818	-0.361337	-0.604328	-0.603065	-0.367371	-0.29502	-0.196418	-0.108775	-0.00519758	0.000879057	0.0244883	0.0229599
1.819	-0.360253	-0.60377	-0.602848	-0.366963	-0.296955	-0.19804	-0.107461	-0.0041374	0.000295816	0.026203	0.0216887
1.82	-0.359051	-0.603158	-0.602538	-0.366237	-0.298914	-0.199818	-0.106531	-0.00311468	-0.00062554	0.02768	0.0208326
1.821	-0.357695	-0.602474	-0.602147	-0.365177	-0.300607	-0.201502	-0.106051	-0.00234357	-0.00175413	0.028692	0.0203171
1.822	-0.356188	-0.6017	-0.601701	-0.363854	-0.301765	-0.203015	-0.106127	-0.00176321	-0.00280747	0.0289946	0.0201131
1.823	-0.354646	-0.600884	-0.601282	-0.36259	-0.302213	-0.204362	-0.106642	-0.00104098	-0.00353972	0.0285503	0.020201
1.824	-0.353299	-0.600039	-0.600988	-0.361703	-0.301803	-0.20548	-0.107462	-0.000102211	-0.00395348	0.0275312	0.0204958
1.825	-0.352329	-0.599146	-0.600735	-0.361216	-0.300513	-0.206282	-0.108564	0.000650484	-0.0041093	0.0261078	0.0208548
1.826	-0.351695	-0.598316	-0.600325	-0.36099	-0.29852	-0.206748	-0.109771	0.000818529	-0.00388595	0.0243662	0.021185
1.827	-0.351191	-0.597697	-0.599755	-0.360861	-0.296042	-0.206945	-0.110793	0.000316452	-0.00308691	0.0222913	0.0215403
1.828	-0.350585	-0.597365	-0.599112	-0.360701	-0.293296	-0.206959	-0.111498	-0.000784485	-0.00174066	0.0198575	0.02203
1.829	-0.349688	-0.597329	-0.598303	-0.360526	-0.290579	-0.206831	-0.111802	-0.00233642	-0.000214729	0.0171927	0.022561
1.83	-0.348454	-0.597462	-0.597244	-0.36046	-0.288238	-0.206686	-0.111703	-0.00416761	0.00100315	0.0145614	0.0229145
1.831	-0.34711	-0.597587	-0.59617	-0.360651	-0.286537	-0.206795	-0.111572	-0.00618779	0.00151537	0.0122494	0.0231006
1.832	-0.345975	-0.597552	-0.595442	-0.361256	-0.285622	-0.207336	-0.111878	-0.00829508	0.00114191	0.0104637	0.0233053
1.833	-0.345143	-0.597198	-0.595168	-0.362311	-0.28548	-0.20823	-0.11271	-0.0103415	-2.22e-05	0.00928109	0.0236092
1.834	-0.344482	-0.596529	-0.595245	-0.363581	-0.285946	-0.209358	-0.113742	-0.0122273	-0.0016525	0.00877358	0.0240055
1.835	-0.343805	-0.595769	-0.595561	-0.364712	-0.286858	-0.210792	-0.114527	-0.013826	-0.00331698	0.00907373	0.0245092
1.836	-0.34296	-0.595146	-0.595995	-0.365524	-0.288072	-0.212611	-0.114805	-0.0149314	-0.0046835	0.0101843	0.0251282
1.837	-0.341937	-0.594764	-0.59645	-0.365992	-0.289301	-0.214565	-0.114601	-0.0153787	-0.0055838	0.0119421	0.0259253
1.838	-0.340934	-0.594584	-0.596881	-0.366146	-0.290148	-0.216098	-0.114123	-0.0150404	-0.00604419	0.0141509	0.0270429
1.839	-0.340233	-0.594503	-0.597198	-0.36606	-0.290401	-0.216723	-0.11357	-0.0138406	-0.0063045	0.0165683	0.0284212
1.84	-0.340002	-0.594444	-0.597365	-0.365822	-0.290172	-0.216386	-0.113082	-0.0119603	-0.00647635	0.0189629	0.0296843
1.841	-0.34024	-0.594354	-0.597481	-0.365614	-0.289735	-0.215392	-0.112801	-0.00982326	-0.00628739	0.0211553	0.0304486
1.842	-0.340775	-0.594217	-0.597543	-0.365629	-0.289281	-0.214027	-0.112835	-0.00788667	-0.00548329	0.0228567	0.0305853
1.843	-0.341277	-0.594082	-0.597415	-0.365838	-0.288896	-0.212414	-0.113227	-0.00649665	-0.00421118	0.0237332	0.0302109
1.844	-0.341458	-0.594006	-0.59695	-0.366038	-0.288706	-0.210564	-0.113974	-0.00572576	-0.0028413	0.0237131	0.0294758
1.845	-0.341217	-0.593989	-0.596063	-0.366032	-0.288793	-0.208461	-0.115001	-0.00542148	-0.00173377	0.0230086	0.0283892
1.846	-0.340608	-0.593982	-0.594843	-0.365696	-0.289032	-0.206195	-0.116073	-0.00551698	-0.00108894	0.0218264	0.0269916
1.847	-0.339734	-0.593869	-0.593456	-0.364989	-0.289227	-0.204001	-0.116787	-0.00607196	-0.000847853	0.0202762	0.0255377
1.848	-0.338651	-0.593475	-0.592024	-0.363951	-0.289323	-0.202027	-0.11677	-0.00710248	-0.000882321	0.0184795	0.0243408
1.849	-0.337433	-0.592743	-0.590711	-0.362689	-0.289366	-0.200278	-0.115859	-0.008518	-0.00123018	0.0166719	0.0236236
1.85	-0.336235	-0.591722	-0.589674	-0.361344	-0.289388	-0.198841	-0.114169	-0.0100527	-0.0019314	0.0153545	0.0234418
1.851	-0.335214	-0.590375	-0.588915	-0.360054	-0.2894	-0.197806	-0.112004	-0.0112772	-0.00280307	0.015076	0.023613
1.852	-0.334447	-0.588651	-0.588395	-0.358926	-0.289395	-0.197057	-0.109748	-0.0118436	-0.00367882	0.0159724	0.0238778
1.853	-0.333877	-0.58665	-0.588066	-0.357974	-0.289385	-0.196415	-0.107798	-0.0117826	-0.00455636	0.0176933	0.024183
1.854	-0.333424	-0.584554	-0.587753	-0.357145	-0.289335	-0.195787	-0.106359	-0.0114402	-0.00538065	0.0195764	0.0246833
1.855	-0.333112	-0.582532	-0.587329	-0.356379	-0.28912	-0.195059	-0.105412	-0.0111129	-0.006092	0.0209342	0.0254231
1.856	-0.333034	-0.580765	-0.586851	-0.355546	-0.288729	-0.194167	-0.104962	-0.0108569	-0.00676079	0.0213921	0.0262068
1.857	-0.333188	-0.579458	-0.586377	-0.354493	-0.288411	-0.193192	-0.105009	-0.0105211	-0.0073962	0.0209319	0.0267881
1.858	-0.333418	-0.578727	-0.585862	-0.353176	-0.288392	-0.192141	-0.105409	-0.00994047	-0.00788214	0.0197409	0.0270571
1.859	-0.333503	-0.578534	-0.585229	-0.351719	-0.288594	-0.190957	-0.105955	-0.00918797	-0.00815095	0.0180301	0.0270798
1.86	-0.333211	-0.578748	-0.584439	-0.3504	-0.28876	-0.189746	-0.106502	-0.00851661	-0.00823767	0.0157816	0.026902
1.861	-0.332379	-0.579211	-0.58357	-0.349416	-0.288587	-0.188667	-0.107033	-0.00804719	-0.00826838	0.0128889	0.0264533
1.862	-0.331079	-0.579767	-0.582825	-0.348686	-0.287802	-0.187841	-0.107564	-0.00775378	-0.00833178	0.00955639	0.0257362
1.863	-0.329568	-0.580234	-0.582361	-0.34808	-0.286405	-0.187374	-0.107933	-0.00776076	-0.00829936	0.00621388	0.0248341
1.864	-0.328073	-0.580389	-0.582149	-0.347616	-0.284662	-0.187288	-0.107809	-0.00829302	-0.0079687	0.0031062	0.0238189
1.865	-0.326739	-0.580108	-0.582064	-0.347381	-0.282801	-0.187603	-0.107018	-0.00925045	-0.00730952	0.000245239	0.0228783
1.866	-0.325631	-0.579456	-0.582006	-0.347499	-0.280948	-0.188322	-0.105662	-0.0101532	-0.00650558	-0.00217453	0.0223198
1.867	-0.32467	-0.578543	-0.581942	-0.347993	-0.279288	-0.189286	-0.103948	-0.0106808	-0.00585156	-0.00376501	0.0222571
1.868	-0.32376	-0.577397	-0.581814	-0.348754	-0.278059	-0.19028	-0.102188	-0.0111034	-0.00553613	-0.00444261	0.0224493
1.869	-0.322935	-0.576023	-0.58149	-0.349705	-0.27738	-0.191165	-0.100726	-0.0118903	-0.00555489	-0.00449911	0.0225999
1.87	-0.322257	-0.574524	-0.580912	-0.350665	-0.27714	-0.191833	-0.0997366	-0.0130062	-0.00580096	-0.00434939	0.0227012
1.871	-0.321638	-0.573068	-0.580103	-0.35129	-0.276988	-0.192183	-0.0992814	-0.0139004	-0.00610356	-0.00428608	0.0229896
1.872	-0.320899	-0.571778	-0.579078	-0.351402	-0.276499	-0.192184	-0.0993955	-0.0139715	-0.00627599	-0.00424796	0.023714
1.873	-0.319937	-0.570696	-0.577896	-0.351053	-0.275401	-0.1919	-0.0999404	-0.0128944	-0.00618812	-0.00394515	0.0249645
1.874	-0.318833	-0.569794	-0.576633	-0.350378	-0.273582	-0.191424	-0.100705	-0.0107942	-0.00586325	-0.00320706	0.0265637
1.875	-0.317773	-0.569008	-0.575348	-0.349495	-0.271038	-0.190885	-0.101641	-0.00820798	-0.00551939	-0.00214055	0.0280746
1.876	-0.316821	-0.568331	-0.574154	-0.348432	-0.267904	-0.190477	-0.102703	-0.00575408	-0.00534214	-0.00101915	0.0290089
1.877	-0.315943	-0.567818	-0.573128	-0.34718	-0.264449	-0.190446	-0.103737	-0.00379672	-0.00526791	-2.92e-05	0.0291187
1.878	-0.315171	-0.567481	-0.572295	-0.345742	-0.260988	-0.19101	-0.104686	-0.00245648	-0.00507719	0.000872628	0.0284839
1.879	-0.314572	-0.567207	-0.571801	-0.344146	-0.257735	-0.192234	-0.105574	-0.00176387	-0.0046142	0.0017631	0.027288
1.88	-0.314175	-0.56683	-0.571793	-0.342533	-0.254767	-0.193961	-0.106347	-0.00170819	-0.00395058	0.00249413	0.0256582
1.881	-0.313939	-0.566248	-0.572173	-0.341232	-0.252167	-0.195907	-0.106977	-0.00227302	-0.00336995	0.00290284	0.0238323
1.882	-0.313764	-0.56547	-0.572685	-0.340624	-0.24999	-0.197725	-0.107443	-0.00333814	-0.00315841	0.00311006	0.0221126
1.883	-0.313539	-0.564592	-0.573142	-0.340813	-0.248194	-0.199039	-0.107535	-0.00469203	-0.00344917	0.00336124	0.0206818
1.884	-0.313171	-0.563738	-0.57347	-0.341529	-0.246886	-0.19965	-0.107112	-0.00622941	-0.0041833	0.00382317	0.0197311
1.885	-0.312631	-0.562989	-0.573664	-0.34246	-0.2463	-0.199605	-0.106377	-0.00774524	-0.00514927	0.00456769	0.0194082
1.886	-0.311974	-0.562325	-0.573694	-0.343525	-0.246441	-0.199058	-0.105637	-0.00882498	-0.00614394	0.005489	0.0196776
1.887	-0.311281	-0.561717	-0.573492	-0.344713	-0.247031	-0.198209	-0.105064	-0.00920425	-0.00701018	0.00640444	0.0204416
1.888	-0.310615	-0.561227	-0.57298	-0.345915	-0.2477	-0.197249	-0.104649	-0.00875789	-0.00756188	0.00729972	0.0216046
1.889	-0.310054	-0.56085	-0.572148	-0.346934	-0.248082	-0.196254	-0.104235	-0.00733786	-0.00772966	0.00817139	0.0230755
1.89	-0.309684	-0.560451	-0.571129	-0.347525	-0.247972	-0.195213	-0.103729	-0.00499632	-0.00761306	0.00886396	0.0248263
1.891	-0.309485	-0.56	-0.570145	-0.347579	-0.247448	-0.194163	-0.103298	-0.00201338	-0.00727654	0.00922523	0.0268781
1.892	-0.309335	-0.559687	-0.569407	-0.347162	-0.246701	-0.193087	-0.103179	0.00128413	-0.00679554	0.00915145	0.0291172
1.893	-0.309142	-0.559761	-0.569034	-0.346305	-0.245891	-0.191774	-0.103483	0.00439303	-0.00631097	0.00860346	0.0311032
1.894	-0.308872	-0.560288	-0.568956	-0.345037	-0.245245	-0.190097	-0.104185	0.00662601	-0.00584309	0.00772564	0.0322648
1.895	-0.30847	-0.56102	-0.569027	-0.343554	-0.244931	-0.188202	-0.105092	0.00749167	-0.00535586	0.00682211	0.0323416
1.896	-0.307837	-0.561594	-0.569152	-0.342098	-0.244855	-0.186374	-0.106005	0.00686694	-0.00495479	0.00619354	0.0314689
1.897	-0.306964	-0.561836	-0.569163	-0.340912	-0.244869	-0.1849	-0.107001	0.00497556	-0.00478232	0.00596634	0.0299554
1.898	-0.305959	-0.561774	-0.568867	-0.34028	-0.244985	-0.183949	-0.108185	0.00227672	-0.00477297	0.00596696	0.0280941
1.899	-0.304912	-0.56147	-0.568219	-0.340251	-0.245256	-0.183485	-0.109334	-0.000876636	-0.0046855	0.00596154	0.0261091
1.9	-0.303862	-0.560913	-0.567221	-0.340481	-0.245758	-0.183365	-0.110107	-0.00427677	-0.00439675	0.00596692	0.0241524
1.901	-0.302963	-0.560036	-0.565914	-0.340662	-0.246623	-0.183526	-0.110371	-0.00764199	-0.00408175	0.00600154	0.0222359
1.902	-0.302507	-0.558901	-0.56449	-0.340781	-0.247821	-0.183949	-0.110237	-0.0107195	-0.00396265	0.00594863	0.0203349
1.903	-0.302704	-0.55775	-0.563149	-0.340917	-0.249089	-0.184552	-0.109904	-0.0134642	-0.00397523	0.00582185	0.018585
1.904	-0.303517	-0.556765	-0.561912	-0.341045	-0.250194	-0.18522	-0.109482	-0.015944	-0.0039602	0.00563399	0.0171748
1.905	-0.304734	-0.555872	-0.560748	-0.340993	-0.251002	-0.185721	-0.108992	-0.0182212	-0.0039181	0.00517551	0.0160881
1.906	-0.306083	-0.554886	-0.559686	-0.340526	-0.251406	-0.185725	-0.108485	-0.0203626	-0.00387602	0.00428236	0.0151021
1.907	-0.30731	-0.553728	-0.558801	-0.339469	-0.251339	-0.185124	-0.108051	-0.0224019	-0.00377178	0.00299823	0.014093
1.908	-0.308248	-0.552415	-0.558217	-0.337804	-0.250763	-0.184076	-0.107805	-0.0243272	-0.00361266	0.00139561	0.013239
1.909	-0.308806	-0.551019	-0.557934	-0.335707	-0.249666	-0.182773	-0.107917	-0.0261362	-0.00355389	-0.00047329	0.0127595
1.91	-0.308922	-0.549656	-0.557757	-0.333475	-0.248082	-0.181371	-0.108346	-0.0277348	-0.00360315	-0.00247563	0.0126064
1.911	-0.308575	-0.548437	-0.557574	-0.331378	-0.246092	-0.180006	-0.108644	-0.0288466	-0.00349777	-0.00430647	0.0126323
1.912	-0.307778	-0.54738	-0.5574	-0.329547	-0.243801	-0.178783	-0.108403	-0.0292128	-0.00303632	-0.00550731	0.0128263
1.913	-0.30656	-0.546396	-0.557238	-0.32807	-0.241326	-0.177695	-0.107699	-0.0288174	-0.00227005	-0.00573253	0.0131557
1.914	-0.304988	-0.545402	-0.557097	-0.327117	-0.23885	-0.176589	-0.106889	-0.0278891	-0.00138474	-0.00497987	0.013433
1.915	-0.303212	-0.54437	-0.556994	-0.326739	-0.236584	-0.175561	-0.106179	-0.0267316	-0.000637662	-0.00342696	0.0135036
1.916	-0.301487	-0.54323	-0.556868	-0.326741	-0.234727	-0.17512	-0.105509	-0.0255127	-0.000349013	-0.00111279	0.0133302
1.917	-0.300062	-0.541935	-0.556588	-0.326883	-0.233558	-0.175651	-0.104718	-0.0242029	-0.000715277	0.00208099	0.0129037
1.918	-0.29898	-0.540582	-0.55613	-0.327011	-0.233243	-0.177092	-0.103813	-0.0227074	-0.00162239	0.00618719	0.0123816
1.919	-0.29814	-0.539324	-0.555579	-0.327127	-0.23354	-0.179144	-0.103076	-0.0211204	-0.00276803	0.0109312	0.0121755
1.92	-0.297515	-0.538283	-0.554968	-0.327365	-0.234102	-0.181403	-0.10276	-0.0197479	-0.0039068	0.0156868	0.0125993
1.921	-0.297165	-0.537581	-0.554341	-0.327775	-0.234855	-0.183471	-0.102845	-0.0187593	-0.00494908	0.0197798	0.0135409
1.922	-0.297071	-0.537296	-0.553801	-0.328299	-0.235907	-0.185121	-0.103192	-0.0179575	-0.00590252	0.0227907	0.0145571
1.923	-0.297127	-0.537373	-0.553307	-0.328881	-0.237271	-0.186232	-0.10365	-0.0169466	-0.00670935	0.0244652	0.015268
1.924	-0.297223	-0.537639	-0.552721	-0.329484	-0.238746	-0.186756	-0.104157	-0.0155235	-0.00711097	0.0246542	0.0156251
1.925	-0.297171	-0.537895	-0.55204	-0.330038	-0.240054	-0.1868	-0.10477	-0.0138383	-0.00673449	0.0234818	0.0157197
1.926	-0.296746	-0.537993	-0.551317	-0.330428	-0.240929	-0.186396	-0.105385	-0.0121673	-0.00545082	0.0213869	0.0155301
1.927	-0.295907	-0.537874	-0.550579	-0.330563	-0.241197	-0.185361	-0.105665	-0.0107458	-0.00355377	0.0189313	0.0150358
1.928	-0.294748	-0.537591	-0.549921	-0.330467	-0.24099	-0.18363	-0.105365	-0.0097725	-0.00149618	0.0165451	0.0143559
1.929	-0.293335	-0.537199	-0.549451	-0.33026	-0.240619	-0.181499	-0.104628	-0.00933713	0.000345218	0.0143887	0.013639
1.93	-0.291779	-0.536628	-0.549236	-0.330082	-0.240233	-0.179426	-0.103861	-0.00946207	0.00169732	0.0125001	0.0130226
1.931	-0.290262	-0.535821	-0.549303	-0.33008	-0.239833	-0.177907	-0.103285	-0.0101842	0.00243099	0.0110586	0.0127246
1.932	-0.288894	-0.534894	-0.549617	-0.330401	-0.239405	-0.17736	-0.10274	-0.0113372	0.00256599	0.0103615	0.0130022
1.933	-0.287719	-0.533962	-0.550141	-0.331089	-0.238865	-0.177847	-0.102009	-0.0125115	0.00220888	0.0105679	0.0140706
1.934	-0.286754	-0.533057	-0.550831	-0.332092	-0.23807	-0.17913	-0.101134	-0.0134186	0.00148359	0.0115841	0.0160201
1.935	-0.286017	-0.532238	-0.551554	-0.333395	-0.236853	-0.180914	-0.1003	-0.0140158	0.000507727	0.0131426	0.0187273
1.936	-0.285596	-0.531557	-0.552155	-0.334969	-0.234971	-0.182898	-0.0995976	-0.0143711	-0.000514802	0.0149107	0.0219322
1.937	-0.285525	-0.531017	-0.552537	-0.336701	-0.232283	-0.184686	-0.0990687	-0.014582	-0.00129044	0.0166088	0.0253366
1.938	-0.285696	-0.530683	-0.552668	-0.338411	-0.228753	-0.185811	-0.0987917	-0.0146301	-0.00165982	0.018014	0.0285873
1.939	-0.286002	-0.530638	-0.55259	-0.339806	-0.224179	-0.186034	-0.0988618	-0.0144304	-0.00173204	0.018911	0.0312867
1.94	-0.286406	-0.530811	-0.552385	-0.340608	-0.218201	-0.185587	-0.0994325	-0.0141159	-0.00169953	0.0191926	0.0331057
1.941	-0.286827	-0.531038	-0.552108	-0.340759	-0.21057	-0.184909	-0.100645	-0.0139538	-0.00160569	0.0187969	0.0339016
1.942	-0.287086	-0.531199	-0.551733	-0.340321	-0.201324	-0.184194	-0.102402	-0.0140769	-0.00141391	0.0175771	0.0337619
1.943	-0.287006	-0.531181	-0.551185	-0.339407	-0.190805	-0.183411	-0.104321	-0.0144738	-0.00116297	0.0155467	0.0329441
1.944	-0.286485	-0.530972	-0.550428	-0.338214	-0.179597	-0.182541	-0.105894	-0.0150259	-0.000902078	0.0130167	0.0316435
1.945	-0.285583	-0.530784	-0.549466	-0.336861	-0.168357	-0.181594	-0.106805	-0.015655	-0.000675869	0.010371	0.0298343
1.946	-0.284542	-0.530846	-0.54837	-0.335348	-0.157586	-0.180545	-0.107146	-0.0165158	-0.000615742	0.00793152	0.027484
1.947	-0.283546	-0.531128	-0.547308	-0.333799	-0.147537	-0.179375	-0.107175	-0.0177172	-0.000833382	0.00592023	0.0248061
1.948	-0.282577	-0.53142	-0.546397	-0.332425	-0.138368	-0.178188	-0.106986	-0.0189626	-0.00129773	0.00438892	0.022157
1.949	-0.281607	-0.531504	-0.545644	-0.331275	-0.130375	-0.177225	-0.106512	-0.0198121	-0.0019187	0.00327683	0.0198245
1.95	-0.280729	-0.531191	-0.544985	-0.330232	-0.123968	-0.176677	-0.105776	-0.0199693	-0.00263132	0.00260953	0.0179179
1.951	-0.280044	-0.530429	-0.54434	-0.32913	-0.119437	-0.176515	-0.104911	-0.0191999	-0.00339797	0.00250752	0.0163896
1.952	-0.279552	-0.529394	-0.54368	-0.327856	-0.116821	-0.176507	-0.104013	-0.0174779	-0.00418467	0.00299799	0.0152839
1.953	-0.279201	-0.528385	-0.543023	-0.326428	-0.116002	-0.176364	-0.103155	-0.0150942	-0.00486377	0.00411496	0.0148623
1.954	-0.278987	-0.527659	-0.542345	-0.324907	-0.116814	-0.175867	-0.102335	-0.0123481	-0.00513352	0.00598401	0.0154033
1.955	-0.278914	-0.527338	-0.541542	-0.323289	-0.118986	-0.174903	-0.10147	-0.00944864	-0.00461274	0.00851986	0.0169568
1.956	-0.278895	-0.527336	-0.540453	-0.321594	-0.122117	-0.173528	-0.100564	-0.00662816	-0.00313603	0.0114251	0.0192
1.957	-0.27884	-0.527426	-0.538972	-0.319955	-0.125772	-0.171948	-0.0997297	-0.00399487	-0.000992635	0.0144353	0.0216127
1.958	-0.278761	-0.527392	-0.537191	-0.318525	-0.129643	-0.170301	-0.0990567	-0.0015351	0.00133939	0.0172891	0.0239282
1.959	-0.278638	-0.527084	-0.535378	-0.317432	-0.133666	-0.168589	-0.0985672	0.000691573	0.00370711	0.0197653	0.0262224
1.96	-0.278446	-0.526484	-0.533819	-0.316774	-0.137896	-0.16676	-0.0981859	0.00259629	0.00623156	0.0217766	0.0284964
1.961	-0.278249	-0.525767	-0.532719	-0.316562	-0.142186	-0.164812	-0.0977526	0.00409411	0.00886798	0.0233037	0.0304239
1.962	-0.277974	-0.525179	-0.532157	-0.316751	-0.146185	-0.162941	-0.0971438	0.00504549	0.0113797	0.0244327	0.0315675
1.963	-0.277445	-0.524791	-0.532077	-0.317358	-0.149689	-0.161484	-0.0962981	0.00526533	0.0135661	0.0253291	0.0316665
1.964	-0.276675	-0.524433	-0.532344	-0.3184	-0.152808	-0.160688	-0.0952346	0.0045308	0.0152214	0.0260768	0.0308167
1.965	-0.275789	-0.523959	-0.532863	-0.319813	-0.155747	-0.1606	-0.0940986	0.00280996	0.0160773	0.0266973	0.0294714
1.966	-0.274862	-0.523377	-0.533608	-0.321412	-0.158584	-0.161019	-0.0930589	0.000509718	0.0160493	0.0272824	0.0281212
1.967	-0.273994	-0.522693	-0.534532	-0.322845	-0.161267	-0.161711	-0.0922498	-0.00181153	0.0153563	0.0280308	0.0270481
1.968	-0.273371	-0.52188	-0.535543	-0.323789	-0.163749	-0.162802	-0.0918225	-0.00387756	0.0141836	0.0291567	0.0263599
1.969	-0.273152	-0.520969	-0.536488	-0.324207	-0.166082	-0.164584	-0.091842	-0.00573835	0.0124373	0.0307929	0.0260266
1.97	-0.273291	-0.519998	-0.537139	-0.324204	-0.168382	-0.167067	-0.0922377	-0.00756378	0.00989355	0.0328849	0.0259773
1.971	-0.273531	-0.518948	-0.537349	-0.323812	-0.170855	-0.169968	-0.0929196	-0.00942884	0.00647793	0.0351057	0.0261665
1.972	-0.273679	-0.517819	-0.537177	-0.323039	-0.173715	-0.172925	-0.0937374	-0.0111587	0.0024952	0.0369426	0.0264155
1.973	-0.273847	-0.516722	-0.536772	-0.321837	-0.177035	-0.17559	-0.0945334	-0.0124391	-0.0014357	0.0379069	0.0264048
1.974	-0.274216	-0.515804	-0.536229	-0.32011	-0.180813	-0.17772	-0.0954147	-0.0131521	-0.00459114	0.0377638	0.0260071
1.975	-0.274708	-0.515127	-0.535502	-0.317967	-0.185122	-0.179171	-0.0965837	-0.0133651	-0.00637748	0.0365924	0.0254155
1.976	-0.275128	-0.514611	-0.534515	-0.315693	-0.189991	-0.179876	-0.0978976	-0.0130768	-0.00670691	0.0344936	0.0248685
1.977	-0.275304	-0.514159	-0.533347	-0.313536	-0.195232	-0.179918	-0.0989683	-0.012261	-0.0059762	0.0314881	0.0244665
1.978	-0.27509	-0.513822	-0.532165	-0.311754	-0.200573	-0.179438	-0.099527	-0.0110086	-0.00459694	0.0278746	0.0241935
1.979	-0.274511	-0.513733	-0.53105	-0.310649	-0.205863	-0.178488	-0.0995348	-0.00952586	-0.00278568	0.0242217	0.0240042
1.98	-0.273724	-0.513928	-0.530045	-0.310372	-0.21113	-0.177121	-0.0991006	-0.00807309	-0.000750464	0.0210288	0.0239451
1.981	-0.272848	-0.514228	-0.529191	-0.310809	-0.216512	-0.175575	-0.0983554	-0.00683675	0.00120246	0.0186623	0.0241541
1.982	-0.271971	-0.514299	-0.528399	-0.311704	-0.222011	-0.174185	-0.0974025	-0.00583806	0.00283167	0.0172903	0.0247335
1.983	-0.271134	-0.513963	-0.527558	-0.312868	-0.227444	-0.173261	-0.0963542	-0.00501296	0.00403672	0.0168555	0.02573
1.984	-0.270281	-0.513317	-0.526771	-0.314275	-0.232761	-0.173067	-0.095433	-0.00432679	0.00480817	0.0173664	0.0271553
1.985	-0.269431	-0.512448	-0.52623	-0.31591	-0.238035	-0.17368	-0.0949388	-0.00373983	0.00521847	0.0189466	0.0288735
1.986	-0.268748	-0.51133	-0.52602	-0.317636	-0.243131	-0.174981	-0.0949554	-0.00319796	0.00540443	0.021481	0.030655
1.987	-0.26824	-0.510008	-0.526095	-0.319288	-0.247748	-0.176705	-0.0953179	-0.00266778	0.00554229	0.0245882	0.0323465
1.988	-0.267671	-0.508628	-0.526267	-0.32075	-0.251611	-0.178343	-0.0958947	-0.00200932	0.00575497	0.0278457	0.0338024
1.989	-0.266887	-0.507329	-0.526348	-0.32186	-0.254588	-0.179296	-0.0966472	-0.00104037	0.00602269	0.0308408	0.0348841
1.99	-0.265914	-0.506197	-0.526279	-0.322456	-0.25682	-0.179255	-0.0976136	0.000153561	0.00625485	0.0331942	0.0356319
1.991	-0.264825	-0.505216	-0.526033	-0.322428	-0.258539	-0.178226	-0.0988034	0.00131389	0.00635097	0.0345144	0.0362093
1.992	-0.263746	-0.504289	-0.525544	-0.321719	-0.259907	-0.176293	-0.0999278	0.00230651	0.00619614	0.0344546	0.0366871
1.993	-0.262832	-0.503409	-0.524736	-0.320464	-0.26105	-0.173566	-0.100605	0.00306704	0.00578142	0.0329436	0.0369686
1.994	-0.262123	-0.502655	-0.523563	-0.318992	-0.261986	-0.170268	-0.100744	0.00351209	0.00527593	0.0301041	0.0368157
1.995	-0.261575	-0.502052	-0.522153	-0.31753	-0.262662	-0.166719	-0.100435	0.00353723	0.00487852	0.0262021	0.0359937
1.996	-0.261198	-0.5016	-0.520765	-0.31605	-0.26321	-0.163455	-0.099845	0.00295458	0.00468594	0.0218564	0.0344725
1.997	-0.261007	-0.501261	-0.519572	-0.314436	-0.263905	-0.161109	-0.0992331	0.00158978	0.00467855	0.0177488	0.0323765
1.998	-0.26094	-0.50094	-0.518718	-0.3127	-0.264812	-0.159887	-0.0987984	-0.000509167	0.00469186	0.0141796	0.0298832
[truncated: 1,001 more rows]

## Sheet: Q116R_K_S1_N2
	300	100	30	10	3	1	0.3	0.1	0.03	0	0
0	-4.43e-05	-0.000276899	-0.000468893	1.11e-05	-0.000118136	-0.000107059	-3.68e-06	-2.58e-05	3.71e-06	-1.48e-05	-0.000110751
0.001	-0.000337704	-0.00170591	-0.00300354	3.01e-05	-0.000778853	-0.000638099	-1.98e-05	-0.000149881	1.25e-05	-7.19e-05	-0.000635788
0.002	-0.00121094	-0.00528051	-0.00952673	5.01e-05	-0.00258471	-0.00189162	-0.000106156	-0.000472043	-3.63e-05	-0.000234421	-0.00186424
0.003	-0.00283015	-0.0114341	-0.0207751	0.00016295	-0.00592589	-0.00396274	-0.000359755	-0.00112204	-0.000322535	-0.000676634	-0.0039817
0.004	-0.00509765	-0.0200289	-0.0361247	0.000479824	-0.0107256	-0.00687308	-0.000833208	-0.00218719	-0.00102113	-0.00161316	-0.00712845
0.005	-0.0078695	-0.030585	-0.0542315	0.000980763	-0.0165096	-0.0104942	-0.00158407	-0.00357788	-0.00209442	-0.00311047	-0.0112339
0.006	-0.0110624	-0.0424524	-0.0735555	0.00148949	-0.0227512	-0.0144154	-0.00260663	-0.00503741	-0.00329187	-0.00503454	-0.0159954
0.007	-0.0145862	-0.0549183	-0.0926766	0.00170368	-0.0290711	-0.018202	-0.00372675	-0.00624577	-0.00439877	-0.00715654	-0.0210716
0.008	-0.0182776	-0.0672411	-0.110408	0.00144921	-0.035173	-0.0216269	-0.00479418	-0.00692776	-0.00539448	-0.00917548	-0.0261504
0.009	-0.0219305	-0.0787709	-0.125869	0.00086496	-0.0407577	-0.0245939	-0.00577043	-0.0069404	-0.00629685	-0.0107247	-0.030892
0.01	-0.0253558	-0.0891048	-0.138524	0.00019729	-0.0454696	-0.0270449	-0.00666526	-0.00629017	-0.00699627	-0.0115665	-0.0348482
0.011	-0.0283193	-0.0979685	-0.148201	-0.00041446	-0.0489727	-0.0289172	-0.0075295	-0.0051514	-0.00733848	-0.0116131	-0.0375363
0.012	-0.0305899	-0.105139	-0.155132	-0.000952271	-0.0511554	-0.0300646	-0.00836318	-0.00388264	-0.00726686	-0.0108391	-0.0387267
0.013	-0.0321596	-0.110643	-0.15978	-0.00151113	-0.0522111	-0.0303214	-0.00903298	-0.00280282	-0.00687887	-0.00939655	-0.038586
0.014	-0.0331928	-0.114734	-0.16256	-0.00229561	-0.0524255	-0.0297396	-0.00934529	-0.00201476	-0.00639986	-0.0076227	-0.0374669
0.015	-0.0337811	-0.117635	-0.163784	-0.00353581	-0.0520074	-0.0286024	-0.00920849	-0.00165917	-0.00611708	-0.00588622	-0.035722
0.016	-0.0339826	-0.119371	-0.163739	-0.00531936	-0.0511333	-0.0271804	-0.00866709	-0.00195287	-0.00628165	-0.00454401	-0.0337305
0.017	-0.0338979	-0.119831	-0.162733	-0.00745275	-0.0499678	-0.0256482	-0.00777495	-0.00281351	-0.00690028	-0.0039301	-0.0318139
0.018	-0.0335102	-0.11896	-0.161156	-0.0095998	-0.0486758	-0.024186	-0.0065696	-0.00384614	-0.00776071	-0.00430813	-0.0301113
0.019	-0.0327793	-0.11682	-0.159461	-0.0115706	-0.0474253	-0.0229954	-0.00515965	-0.00470119	-0.00877867	-0.00587526	-0.0287111
0.02	-0.0318539	-0.113566	-0.157942	-0.0134158	-0.0463735	-0.0222227	-0.00375544	-0.00524845	-0.0100122	-0.00862101	-0.0277184
0.021	-0.0309644	-0.109537	-0.156626	-0.0152729	-0.0456531	-0.0219847	-0.00254132	-0.00554346	-0.0114935	-0.0121548	-0.0271018
0.022	-0.0303377	-0.105312	-0.155456	-0.0171041	-0.0453845	-0.02234	-0.00158094	-0.00567245	-0.0132312	-0.0158333	-0.0266863
0.023	-0.0301695	-0.101527	-0.154469	-0.0186805	-0.0456619	-0.0230837	-0.00096642	-0.005601	-0.0151106	-0.019095	-0.0262286
0.024	-0.030521	-0.0985445	-0.15379	-0.0197562	-0.0464221	-0.023897	-0.000935913	-0.00521396	-0.0168826	-0.0216918	-0.0254604
0.025	-0.0313353	-0.0963873	-0.153427	-0.0201063	-0.0474604	-0.0246594	-0.00176704	-0.00442031	-0.018266	-0.0234952	-0.0242246
0.026	-0.032501	-0.0950475	-0.153208	-0.0196824	-0.0486356	-0.0253072	-0.00350533	-0.00324856	-0.0189913	-0.0242473	-0.0224925
0.027	-0.0338179	-0.0945822	-0.152969	-0.0187944	-0.0498971	-0.0256851	-0.00584628	-0.00182153	-0.0189945	-0.023732	-0.0202674
0.028	-0.0350142	-0.0948849	-0.152595	-0.0179045	-0.0511144	-0.0256825	-0.00835944	-0.000297917	-0.0184752	-0.0219212	-0.0175728
0.029	-0.0359558	-0.0956482	-0.152007	-0.0173423	-0.0520333	-0.0252664	-0.0106974	0.000960584	-0.0175668	-0.0189094	-0.014455
0.03	-0.0367058	-0.0965735	-0.151263	-0.0173332	-0.0524192	-0.0243994	-0.0126889	0.00139517	-0.0162108	-0.0150046	-0.0110935
0.031	-0.0373246	-0.0974399	-0.150574	-0.0181075	-0.0521772	-0.0230946	-0.0142989	0.000602724	-0.0143902	-0.0108065	-0.00783145
0.032	-0.0377776	-0.098081	-0.150116	-0.0197601	-0.0513505	-0.0215221	-0.0153936	-0.00144007	-0.0122413	-0.00698554	-0.0049763
0.033	-0.0380361	-0.0984607	-0.14988	-0.0221035	-0.0500823	-0.0200369	-0.0156725	-0.00438203	-0.0100935	-0.00407631	-0.00273255
0.034	-0.0381899	-0.0986525	-0.149727	-0.0247836	-0.0485452	-0.0190241	-0.0148911	-0.00769551	-0.00845561	-0.00246662	-0.00115279
0.035	-0.0382862	-0.0987277	-0.14955	-0.027449	-0.0468068	-0.0185598	-0.0131431	-0.0109175	-0.00768235	-0.00239112	-0.000138255
0.036	-0.0381638	-0.0987343	-0.149404	-0.029827	-0.0449078	-0.0184146	-0.0108927	-0.01361	-0.0077234	-0.00396897	0.000294406
0.037	-0.0376621	-0.0987587	-0.149431	-0.0317118	-0.0430905	-0.0185006	-0.00868411	-0.0153828	-0.00833792	-0.00716291	-0.000120164
0.038	-0.0368248	-0.0988625	-0.1497	-0.0329651	-0.0417034	-0.0190479	-0.00697805	-0.0161295	-0.0093616	-0.0115652	-0.00177594
0.039	-0.0358913	-0.0989766	-0.150231	-0.0335803	-0.0409835	-0.0202446	-0.00610588	-0.0159701	-0.0106429	-0.0164614	-0.00500178
0.04	-0.0351896	-0.099027	-0.151087	-0.0335742	-0.0410022	-0.0218944	-0.00615171	-0.0150313	-0.0118706	-0.0211397	-0.00988558
0.041	-0.0349126	-0.0990371	-0.152332	-0.0328732	-0.0416348	-0.0235758	-0.00708352	-0.0134963	-0.0127286	-0.0249358	-0.0160857
0.042	-0.0349422	-0.0990837	-0.153841	-0.0315445	-0.042625	-0.0248994	-0.00890937	-0.0116857	-0.0131784	-0.0272464	-0.0225528
0.043	-0.0350112	-0.0991943	-0.155238	-0.0300162	-0.0437655	-0.0254945	-0.0114523	-0.00987869	-0.0134029	-0.0277456	-0.0277487
0.044	-0.0350072	-0.0993205	-0.156121	-0.0289291	-0.0450137	-0.0250971	-0.0142076	-0.00820244	-0.0135024	-0.0265003	-0.0304407
0.045	-0.0349471	-0.0994649	-0.156308	-0.0288558	-0.0464547	-0.0237318	-0.0165781	-0.00684559	-0.0132751	-0.0239096	-0.0302036
0.046	-0.0348301	-0.0996636	-0.155965	-0.0301138	-0.0482296	-0.0216883	-0.0181544	-0.0061701	-0.0124713	-0.0205086	-0.0273742
0.047	-0.0346442	-0.0999498	-0.155457	-0.0325819	-0.0503791	-0.0194108	-0.0188775	-0.00644748	-0.0112905	-0.0166961	-0.0226387
0.048	-0.0344113	-0.100312	-0.154974	-0.0356727	-0.0525695	-0.0173419	-0.0189069	-0.00760976	-0.0103197	-0.0126327	-0.016696
0.049	-0.034273	-0.100591	-0.154417	-0.0386781	-0.0542459	-0.015678	-0.0182576	-0.00935273	-0.0100794	-0.00846889	-0.0103254
0.05	-0.0344094	-0.100691	-0.153697	-0.0411077	-0.0550659	-0.0143523	-0.0167193	-0.0113404	-0.0107832	-0.00458695	-0.00437954
0.051	-0.0348542	-0.10065	-0.15291	-0.042696	-0.0549512	-0.0132407	-0.0141399	-0.0132523	-0.0123386	-0.00148592	0.000503893
0.052	-0.0355142	-0.100445	-0.152203	-0.0433082	-0.053948	-0.0123221	-0.0106755	-0.0148356	-0.0144235	0.000461707	0.0039602
0.053	-0.0362918	-0.100043	-0.151705	-0.0429531	-0.052165	-0.0117724	-0.00671962	-0.0159968	-0.01654	0.000998232	0.00570451
0.054	-0.037142	-0.0995161	-0.15143	-0.0417776	-0.0497658	-0.0118478	-0.00275032	-0.0166753	-0.0181744	-2.03e-05	0.00559466
0.055	-0.0380333	-0.0989682	-0.151223	-0.0400272	-0.0470057	-0.0127018	0.000636823	-0.0166705	-0.0190027	-0.00233759	0.00380378
0.056	-0.0389007	-0.0985031	-0.151015	-0.0381132	-0.0442144	-0.0144132	0.0028553	-0.0157907	-0.0189089	-0.00530784	0.000754889
0.057	-0.0396669	-0.0982681	-0.150925	-0.036498	-0.041662	-0.0171347	0.00355886	-0.0140167	-0.0178763	-0.00835302	-0.00299437
0.058	-0.0402938	-0.0983973	-0.151059	-0.0354174	-0.0394603	-0.0211283	0.00259607	-0.0114262	-0.0159064	-0.0111477	-0.00683674
0.059	-0.0407583	-0.0988618	-0.151406	-0.034924	-0.037702	-0.0265649	5.21e-05	-0.0081863	-0.0130945	-0.0133878	-0.0102404
0.06	-0.0409963	-0.0994353	-0.151879	-0.03503	-0.0365872	-0.0333884	-0.003608	-0.00457083	-0.00973995	-0.0146984	-0.0128509
0.061	-0.0409729	-0.0997442	-0.152449	-0.035662	-0.036276	-0.0412532	-0.00778693	-0.000867227	-0.00621958	-0.0148232	-0.0144558
0.062	-0.0406831	-0.0994261	-0.153169	-0.0366328	-0.0367747	-0.0495162	-0.0120555	0.00253348	-0.00277503	-0.0138236	-0.0148339
0.063	-0.0400488	-0.0984171	-0.154006	-0.0377376	-0.0379843	-0.0574387	-0.0160743	0.00508986	0.000506241	-0.0120398	-0.0137543
0.064	-0.039012	-0.0970323	-0.154765	-0.0388867	-0.039706	-0.0641166	-0.0195625	0.00632837	0.00356054	-0.00974457	-0.0112235
0.065	-0.0376238	-0.0957289	-0.155238	-0.0400365	-0.0416478	-0.0685099	-0.0223726	0.00592444	0.00622885	-0.00692826	-0.00773176
0.066	-0.0359689	-0.0948285	-0.155302	-0.0410485	-0.0435019	-0.0699905	-0.0243525	0.00373676	0.00825426	-0.00350345	-0.00414194
0.067	-0.034196	-0.0944761	-0.15487	-0.041726	-0.0450549	-0.0685419	-0.0252954	-7.41e-05	0.0092924	0.00045559	-0.00126793
0.068	-0.0325967	-0.0947348	-0.153954	-0.0419715	-0.0462644	-0.0644915	-0.0250872	-0.00513394	0.00892937	0.00464213	0.000354091
0.069	-0.0315055	-0.0955167	-0.152734	-0.0419741	-0.0471925	-0.0584174	-0.0237683	-0.0109581	0.00690224	0.0084551	0.000488792
0.07	-0.0311129	-0.0966199	-0.151413	-0.0420625	-0.0478444	-0.0511813	-0.021437	-0.016829	0.0033018	0.0110013	-0.000832307
0.071	-0.0314019	-0.0979972	-0.150161	-0.0423688	-0.0481489	-0.0437136	-0.0181995	-0.0219529	-0.00143208	0.0112821	-0.00347633
0.072	-0.0322501	-0.099732	-0.149156	-0.0428269	-0.0481633	-0.0367729	-0.01428	-0.0260002	-0.0066662	0.00853328	-0.00710712
0.073	-0.0335009	-0.101695	-0.148518	-0.0432155	-0.0481231	-0.0308526	-0.010084	-0.0291274	-0.0118601	0.00248079	-0.0110517
0.074	-0.0349436	-0.10345	-0.148289	-0.0432141	-0.0482171	-0.0261117	-0.00608362	-0.0313991	-0.0166851	-0.00653901	-0.0146631
0.075	-0.0364251	-0.104637	-0.148513	-0.0426902	-0.0485219	-0.0225635	-0.00272572	-0.0325541	-0.0208598	-0.0175017	-0.0175068
0.076	-0.0379647	-0.105255	-0.149172	-0.0417997	-0.0490391	-0.0203139	-0.000475575	-0.0323411	-0.0241072	-0.0290066	-0.0192522
0.077	-0.0396658	-0.10542	-0.149959	-0.0408765	-0.0496809	-0.0193663	0.000305933	-0.0309004	-0.0263334	-0.0398354	-0.0196946
0.078	-0.0415701	-0.105174	-0.150418	-0.0403273	-0.0503874	-0.0194104	-0.000374903	-0.0288305	-0.0275743	-0.0491507	-0.0187095
0.079	-0.0435656	-0.104623	-0.150268	-0.040423	-0.0511016	-0.0200726	-0.00213199	-0.0268524	-0.0277502	-0.0564099	-0.0162835
0.08	-0.0454418	-0.104016	-0.14944	-0.0411485	-0.0516094	-0.0211697	-0.00444118	-0.0253387	-0.0267179	-0.061352	-0.0127521
0.081	-0.0470296	-0.103576	-0.147999	-0.0423238	-0.0516283	-0.0225572	-0.00688452	-0.0242164	-0.0245735	-0.0639729	-0.00887196
0.082	-0.0482561	-0.103337	-0.146029	-0.0438208	-0.050985	-0.0239946	-0.00915754	-0.0233278	-0.0217375	-0.0644711	-0.00549262
0.083	-0.0491321	-0.103256	-0.143471	-0.0456038	-0.0497466	-0.0252216	-0.0109725	-0.0227073	-0.0187328	-0.0633669	-0.00313242
0.084	-0.0497495	-0.103313	-0.14034	-0.0476739	-0.048202	-0.0260036	-0.0121258	-0.0223587	-0.0159893	-0.0614485	-0.00194018
0.085	-0.0501777	-0.103421	-0.137081	-0.0500001	-0.0466224	-0.0261874	-0.0125383	-0.0220895	-0.0137604	-0.0594	-0.0019022
0.086	-0.0503252	-0.103485	-0.134333	-0.0524444	-0.0452083	-0.0258344	-0.012225	-0.021667	-0.0121741	-0.0576728	-0.00294881
0.087	-0.0500042	-0.103662	-0.132445	-0.0548606	-0.0441987	-0.025283	-0.0113654	-0.0208283	-0.0114041	-0.0564999	-0.00496107
0.088	-0.0491151	-0.104247	-0.131394	-0.057178	-0.0438226	-0.0249042	-0.0102373	-0.0192468	-0.0115832	-0.0558067	-0.00769887
0.089	-0.0477614	-0.105275	-0.130982	-0.0592445	-0.0442137	-0.024796	-0.00897681	-0.0167562	-0.0125432	-0.0553532	-0.0107772
0.09	-0.0462029	-0.106495	-0.131118	-0.0607843	-0.0453307	-0.0248472	-0.00753745	-0.0136294	-0.0139155	-0.0549568	-0.0137964
0.091	-0.0447078	-0.107466	-0.13198	-0.0616822	-0.0469651	-0.0249319	-0.0058559	-0.0104134	-0.0153872	-0.0545331	-0.0164301
0.092	-0.0433935	-0.10762	-0.133748	-0.0621382	-0.048843	-0.0249433	-0.0039849	-0.00747476	-0.0166518	-0.0540799	-0.0184179
0.093	-0.042225	-0.106625	-0.136321	-0.0624631	-0.0505761	-0.0247971	-0.00212108	-0.00501354	-0.0173604	-0.0535443	-0.0196292
0.094	-0.0411913	-0.104607	-0.139367	-0.0628579	-0.051771	-0.0244844	-0.000559042	-0.0033614	-0.0172972	-0.0527148	-0.0200857
0.095	-0.0403587	-0.101982	-0.142501	-0.0633372	-0.0523555	-0.0240338	0.000438197	-0.00284192	-0.0165008	-0.0513532	-0.0198606
0.096	-0.039821	-0.0991906	-0.145388	-0.0637942	-0.0525667	-0.0234894	0.000890759	-0.0034091	-0.0151312	-0.049303	-0.018994
0.097	-0.0395753	-0.0965833	-0.147733	-0.0641162	-0.0526574	-0.022985	0.00112335	-0.00465362	-0.0132535	-0.0464811	-0.017599
0.098	-0.0394605	-0.0944532	-0.149323	-0.0642836	-0.0526876	-0.0227605	0.0014253	-0.00619323	-0.0109107	-0.0430349	-0.0160498
0.099	-0.0394168	-0.0930259	-0.150087	-0.0644544	-0.0524937	-0.023044	0.00197851	-0.00783398	-0.0083242	-0.0394911	-0.0147462
0.1	-0.0395735	-0.0923711	-0.150034	-0.0648374	-0.0518276	-0.0237857	0.0029586	-0.00929178	-0.00588904	-0.0364505	-0.0137577
0.101	-0.0399984	-0.0923444	-0.149253	-0.0654803	-0.0505921	-0.0247178	0.00438614	-0.0101553	-0.00402876	-0.0342022	-0.0129947
0.102	-0.0405928	-0.0926595	-0.147961	-0.0662775	-0.0489516	-0.0257243	0.00613066	-0.0102066	-0.00298604	-0.0327789	-0.0124818
0.103	-0.041168	-0.0930479	-0.146518	-0.0670853	-0.0471343	-0.0268394	0.00807649	-0.00950452	-0.00276707	-0.0321199	-0.0123579
0.104	-0.0415906	-0.0934217	-0.145296	-0.0677555	-0.045261	-0.0280001	0.0100935	-0.00820564	-0.00327655	-0.0320755	-0.012758
0.105	-0.0418965	-0.0938382	-0.144458	-0.0681312	-0.0434619	-0.0289775	0.0119639	-0.00645576	-0.00437593	-0.032392	-0.0135929
0.106	-0.0421982	-0.0942682	-0.14403	-0.0681078	-0.0419448	-0.029493	0.0134446	-0.00426031	-0.00586432	-0.0326937	-0.0145157
0.107	-0.0425457	-0.0946658	-0.144022	-0.0676586	-0.0409617	-0.0294413	0.0143102	-0.00147101	-0.00748145	-0.0325949	-0.0152088
0.108	-0.0428661	-0.0951275	-0.144309	-0.0667852	-0.0407118	-0.0290176	0.0143042	0.00191649	-0.00898597	-0.0318912	-0.0156436
0.109	-0.0429879	-0.0957218	-0.144505	-0.0655586	-0.0411453	-0.0285629	0.0132821	0.00550531	-0.0102851	-0.0304943	-0.0161067
0.11	-0.0428142	-0.0964466	-0.144237	-0.0641739	-0.0420449	-0.0283435	0.0114534	0.00858997	-0.0113937	-0.0283019	-0.0169352
0.111	-0.0423815	-0.0973067	-0.14352	-0.0628547	-0.0432594	-0.0284893	0.00930205	0.0104592	-0.0123046	-0.025248	-0.0182291
0.112	-0.041673	-0.0982776	-0.142795	-0.0617861	-0.0446044	-0.0290536	0.00720116	0.0106964	-0.0129015	-0.0213514	-0.0198639
0.113	-0.0406005	-0.0993421	-0.142613	-0.061172	-0.0457595	-0.0300176	0.00515486	0.00939394	-0.0129	-0.0168371	-0.0216932
0.114	-0.039261	-0.100472	-0.143232	-0.0611587	-0.0463722	-0.0312692	0.00310941	0.00693109	-0.0120078	-0.012201	-0.0236885
0.115	-0.038017	-0.101581	-0.144609	-0.0617436	-0.046155	-0.0327435	0.001294	0.00360869	-0.0101586	-0.00796403	-0.0259065
0.116	-0.0372656	-0.102566	-0.146599	-0.0629306	-0.0451568	-0.0344085	-7.71e-05	-0.000393821	-0.00762917	-0.00445489	-0.0283696
0.117	-0.0371359	-0.103282	-0.149051	-0.0647794	-0.0439123	-0.0361163	-0.00109897	-0.00495526	-0.00495714	-0.00177281	-0.0310662
0.118	-0.0374163	-0.103576	-0.151916	-0.0672227	-0.0431409	-0.0376911	-0.00199686	-0.0098079	-0.00259837	0.000137824	-0.0340769
0.119	-0.0378699	-0.103392	-0.155264	-0.0700365	-0.0433717	-0.0389987	-0.00291243	-0.0145431	-0.000782009	0.0013146	-0.0375873
0.12	-0.0385211	-0.102787	-0.159065	-0.0729603	-0.0447788	-0.0399327	-0.0038568	-0.0189933	0.000312388	0.00171992	-0.0417466
0.121	-0.0395297	-0.101948	-0.162997	-0.0757694	-0.0472969	-0.0403989	-0.00469197	-0.0232892	0.000428629	0.00133977	-0.046469
0.122	-0.0408204	-0.101156	-0.166588	-0.0783278	-0.0506943	-0.0402885	-0.00520326	-0.0275763	-0.000724744	0.000336757	-0.0513572
0.123	-0.0420859	-0.100573	-0.169502	-0.0805706	-0.054595	-0.0395795	-0.00531192	-0.0318413	-0.00324154	-0.00103631	-0.0559348
0.124	-0.0431662	-0.100151	-0.171606	-0.082384	-0.0586922	-0.0384241	-0.00523828	-0.0359185	-0.00686677	-0.00273673	-0.0598805
0.125	-0.0440648	-0.099832	-0.172875	-0.0836233	-0.0627531	-0.0370121	-0.00545445	-0.0396284	-0.0111316	-0.00483914	-0.0630834
0.126	-0.0448019	-0.0997026	-0.173345	-0.0842751	-0.06645	-0.0353717	-0.00638907	-0.0429532	-0.0155535	-0.00724342	-0.0656249
0.127	-0.0454815	-0.0998427	-0.173126	-0.0845108	-0.0695091	-0.0334979	-0.00809633	-0.046117	-0.0198406	-0.00972232	-0.0676302
0.128	-0.0462065	-0.100199	-0.172428	-0.0846567	-0.0719623	-0.0315592	-0.0102583	-0.0494937	-0.0238524	-0.0120985	-0.0691731
0.129	-0.0469273	-0.100693	-0.171603	-0.0851427	-0.0739805	-0.0297837	-0.0124798	-0.0534263	-0.0273438	-0.0142621	-0.0703751
0.13	-0.0474797	-0.101283	-0.171023	-0.0863065	-0.0755557	-0.0283674	-0.0144469	-0.0580826	-0.0300628	-0.0161037	-0.0714847
0.131	-0.0476826	-0.101975	-0.170773	-0.0882351	-0.076563	-0.0274543	-0.0159368	-0.063435	-0.0320678	-0.0176396	-0.0728538
0.132	-0.0475118	-0.102748	-0.170668	-0.090927	-0.0769483	-0.027104	-0.0168719	-0.0694022	-0.0336943	-0.0191094	-0.0748576
0.133	-0.0471084	-0.103454	-0.170574	-0.0945187	-0.076758	-0.0273469	-0.0172677	-0.0759562	-0.0351896	-0.0206595	-0.0777813
0.134	-0.0465254	-0.103862	-0.170424	-0.0991624	-0.0761723	-0.0281098	-0.0171	-0.0830058	-0.0366055	-0.0221662	-0.08184
0.135	-0.0457326	-0.103827	-0.170043	-0.104697	-0.0755536	-0.0291258	-0.016299	-0.0902837	-0.037988	-0.0234938	-0.0873254
0.136	-0.0448051	-0.103386	-0.169216	-0.110653	-0.0753091	-0.0300733	-0.0149649	-0.0974957	-0.0394338	-0.0246596	-0.0945163
0.137	-0.0439591	-0.102655	-0.167875	-0.116561	-0.0757731	-0.0307352	-0.0135454	-0.104434	-0.0410962	-0.0257449	-0.103301
0.138	-0.0434732	-0.101704	-0.166096	-0.122058	-0.0773349	-0.0310008	-0.0125521	-0.110847	-0.0431405	-0.0267531	-0.113043
0.139	-0.0434584	-0.100565	-0.164081	-0.126847	-0.0803717	-0.0308176	-0.0122596	-0.116351	-0.0456591	-0.0275621	-0.122945
0.14	-0.0437742	-0.0993411	-0.162121	-0.130772	-0.0849259	-0.0302154	-0.012841	-0.120446	-0.0487524	-0.0279193	-0.132414
0.141	-0.0442604	-0.0982082	-0.160439	-0.133702	-0.090588	-0.0293503	-0.014423	-0.12271	-0.0525498	-0.0274587	-0.141023
0.142	-0.0448532	-0.0972958	-0.159142	-0.135467	-0.0966785	-0.0284237	-0.0169276	-0.123132	-0.0570517	-0.0260104	-0.148381
0.143	-0.0454534	-0.0966458	-0.158222	-0.136116	-0.102615	-0.0275136	-0.0200383	-0.122094	-0.0621661	-0.0239499	-0.154208
0.144	-0.0459159	-0.096238	-0.157559	-0.136095	-0.10807	-0.0265437	-0.0233702	-0.120018	-0.0679676	-0.0219358	-0.158342
0.145	-0.0461786	-0.0960534	-0.157076	-0.135973	-0.112827	-0.0253488	-0.0267223	-0.117102	-0.0746789	-0.0204107	-0.160587
0.146	-0.0462331	-0.0961112	-0.15674	-0.135926	-0.116753	-0.0237957	-0.0301175	-0.113444	-0.0822693	-0.019561	-0.160774
0.147	-0.046087	-0.0964801	-0.156473	-0.13563	-0.119782	-0.021909	-0.0336239	-0.109363	-0.0903504	-0.0195144	-0.158941
0.148	-0.0457562	-0.0972496	-0.156219	-0.134759	-0.121802	-0.0198272	-0.037185	-0.105447	-0.0986246	-0.020394	-0.155375
0.149	-0.0452152	-0.0983621	-0.155956	-0.133366	-0.122736	-0.0177652	-0.0405591	-0.102211	-0.107048	-0.0221901	-0.150486
0.15	-0.0444915	-0.0995488	-0.15564	-0.131683	-0.122669	-0.0159933	-0.0435349	-0.0996722	-0.115529	-0.0247031	-0.144552
0.151	-0.0437186	-0.100504	-0.155249	-0.129757	-0.121803	-0.0147161	-0.0461547	-0.0973305	-0.123934	-0.0277124	-0.13764
0.152	-0.0429773	-0.101091	-0.154564	-0.127472	-0.120327	-0.0140315	-0.04862	-0.0946108	-0.132205	-0.0310302	-0.129895
0.153	-0.0421943	-0.101398	-0.152805	-0.124793	-0.118368	-0.0140235	-0.0511791	-0.0912882	-0.140146	-0.0343719	-0.121672
0.154	-0.0413358	-0.101614	-0.149114	-0.121907	-0.116034	-0.0148673	-0.0540101	-0.0873419	-0.147409	-0.0373169	-0.113329
0.155	-0.0406246	-0.101914	-0.14357	-0.119066	-0.11343	-0.0167653	-0.0571906	-0.0826857	-0.153769	-0.0394052	-0.105003
0.156	-0.0403456	-0.102279	-0.137242	-0.116331	-0.110692	-0.0196911	-0.0609474	-0.0771818	-0.159136	-0.0403076	-0.0965841
0.157	-0.0405209	-0.102486	-0.131442	-0.113537	-0.107925	-0.0232282	-0.0656351	-0.0706887	-0.163441	-0.0398956	-0.0878683
0.158	-0.0409569	-0.102521	-0.127162	-0.110367	-0.105049	-0.026773	-0.0713301	-0.0632339	-0.166653	-0.0382174	-0.0787373
0.159	-0.0414646	-0.102681	-0.124896	-0.106499	-0.101839	-0.0299543	-0.077676	-0.0551755	-0.168765	-0.0354382	-0.0691892
0.16	-0.0418962	-0.103176	-0.12466	-0.101878	-0.0980731	-0.0327528	-0.0840932	-0.047101	-0.169854	-0.0317145	-0.0592313
0.161	-0.04214	-0.103929	-0.126175	-0.0967633	-0.0936702	-0.0351819	-0.0900189	-0.0396198	-0.170024	-0.0272401	-0.0488321
0.162	-0.0421564	-0.104764	-0.129225	-0.0914972	-0.0887272	-0.0370615	-0.09509	-0.033083	-0.169129	-0.0223451	-0.0379986
0.163	-0.0419655	-0.105526	-0.133786	-0.0863301	-0.0833354	-0.0381634	-0.0992658	-0.0274692	-0.166883	-0.0174085	-0.0269595
0.164	-0.0416621	-0.106138	-0.139654	-0.0814427	-0.0774702	-0.0384828	-0.102693	-0.0226027	-0.163232	-0.0127706	-0.0161974
0.165	-0.0413854	-0.106643	-0.14611	-0.0769218	-0.0710749	-0.0383697	-0.10537	-0.0183949	-0.158358	-0.00870538	-0.00621105
0.166	-0.0412158	-0.107055	-0.152228	-0.0728138	-0.0642391	-0.038352	-0.107068	-0.0148776	-0.152476	-0.00535007	0.00259627
0.167	-0.0410898	-0.107275	-0.157401	-0.0692565	-0.0572804	-0.0388161	-0.107578	-0.0120413	-0.145631	-0.0027375	0.00994621
0.168	-0.0408744	-0.107262	-0.161471	-0.066413	-0.0505194	-0.0399586	-0.106876	-0.00971837	-0.137669	-0.000915769	0.0157462
0.169	-0.0405678	-0.107035	-0.164499	-0.0643397	-0.0441833	-0.0418399	-0.105095	-0.00766767	-0.1285	3.57e-05	0.0200326
0.17	-0.0402954	-0.106621	-0.166519	-0.0629221	-0.0385379	-0.0441753	-0.102522	-0.00573112	-0.118305	3.87e-06	0.0229663
0.171	-0.0400998	-0.106139	-0.167584	-0.0619185	-0.0337845	-0.0463474	-0.0994802	-0.00389473	-0.107442	-0.00100474	0.0247988
0.172	-0.039972	-0.105799	-0.167911	-0.061053	-0.0300129	-0.0479253	-0.0962012	-0.00213954	-0.0961983	-0.00265798	0.0257736
0.173	-0.0400635	-0.105685	-0.167815	-0.0600328	-0.0273403	-0.0489191	-0.0928682	-0.000230435	-0.0846678	-0.00444715	0.0261172
0.174	-0.0405488	-0.105701	-0.167506	-0.0586505	-0.0257356	-0.0494636	-0.0896338	0.00219543	-0.072827	-0.00595688	0.0259715
0.175	-0.0414785	-0.105802	-0.166965	-0.0569321	-0.0248467	-0.049516	-0.0866038	0.00523475	-0.0606288	-0.00700942	0.025356
0.176	-0.0428202	-0.106068	-0.165731	-0.0550945	-0.0242587	-0.0488603	-0.083859	0.0086049	-0.0481578	-0.00762126	0.0243623
0.177	-0.0443889	-0.106568	-0.163034	-0.0534118	-0.0237132	-0.0472706	-0.0814046	0.0119478	-0.0356886	-0.00780579	0.0233015
0.178	-0.0459637	-0.10727	-0.158619	-0.0520957	-0.0231458	-0.0446787	-0.0790581	0.0149993	-0.0235272	-0.00758284	0.0225315
0.179	-0.0474674	-0.107989	-0.153135	-0.05124	-0.0226788	-0.0412509	-0.0764449	0.0175242	-0.0119514	-0.00710058	0.0222362
0.18	-0.0488815	-0.108535	-0.147506	-0.0508415	-0.022393	-0.0373233	-0.0731887	0.0193069	-0.0011911	-0.00656522	0.022423
0.181	-0.0501902	-0.108886	-0.142335	-0.0508273	-0.0221843	-0.0331924	-0.0691668	0.020195	0.00863553	-0.00613927	0.0230339
0.182	-0.0513765	-0.109137	-0.13788	-0.0511518	-0.0218885	-0.029021	-0.0644659	0.0200748	0.0174118	-0.00593389	0.024037
0.183	-0.0523834	-0.109305	-0.134275	-0.0518665	-0.0214293	-0.0250018	-0.0592072	0.0189393	0.0248806	-0.00602383	0.025413
0.184	-0.0531332	-0.109287	-0.131728	-0.052989	-0.0209133	-0.0214353	-0.0536191	0.0169519	0.0306464	-0.00649561	0.0270397
0.185	-0.0535615	-0.108947	-0.130519	-0.0543624	-0.0205203	-0.0185843	-0.047997	0.0143418	0.0343948	-0.00746577	0.0286554
0.186	-0.0536192	-0.108243	-0.130722	-0.0558083	-0.0203716	-0.0165511	-0.0425186	0.0113793	0.0361403	-0.00890295	0.0299221
0.187	-0.0532699	-0.107258	-0.13204	-0.0572586	-0.0205762	-0.0153934	-0.0372273	0.00833526	0.036153	-0.0105059	0.0305117
0.188	-0.0526125	-0.106028	-0.134057	-0.058602	-0.0212283	-0.0152979	-0.0321293	0.00541337	0.034836	-0.0118702	0.0302865
0.189	-0.051952	-0.104502	-0.136489	-0.0597075	-0.0223173	-0.0164042	-0.0273051	0.00286922	0.0327721	-0.0126852	0.0293918
0.19	-0.0515109	-0.102742	-0.139112	-0.0605669	-0.0236501	-0.0185545	-0.0229207	0.00112381	0.0306489	-0.0127964	0.0280526
0.191	-0.0512146	-0.100977	-0.141684	-0.0612521	-0.0249015	-0.0212638	-0.0191509	0.00058132	0.0289856	-0.0122362	0.0264318
0.192	-0.0509738	-0.0994275	-0.143961	-0.0618457	-0.0257695	-0.0237961	-0.016049	0.00134415	0.0279574	-0.0112323	0.0247763
0.193	-0.0508794	-0.0982703	-0.145715	-0.0624088	-0.0260918	-0.0255848	-0.0133411	0.00321038	0.0274997	-0.0100479	0.0234565
0.194	-0.0509735	-0.0976399	-0.146839	-0.0629871	-0.0259479	-0.026472	-0.0103962	0.00585103	0.0275414	-0.00883817	0.0227802
0.195	-0.0511435	-0.0975291	-0.147406	-0.0635746	-0.0256455	-0.0263713	-0.00666507	0.0088627	0.0281057	-0.00769844	0.0229435
0.196	-0.0512712	-0.0977819	-0.147564	-0.064098	-0.0255024	-0.0251802	-0.00222143	0.0118407	0.0292063	-0.0066707	0.0240002
0.197	-0.051267	-0.0981864	-0.147492	-0.0645295	-0.0256879	-0.0230299	0.00229394	0.0145718	0.0307083	-0.00570106	0.0257012
0.198	-0.0510308	-0.0985705	-0.147473	-0.0649342	-0.0262989	-0.0202948	0.00612668	0.0169418	0.0323735	-0.00472383	0.0275735
0.199	-0.050535	-0.0988292	-0.147842	-0.0654038	-0.0274815	-0.0174087	0.00881579	0.0187178	0.0340146	-0.00374988	0.0292729
0.2	-0.0498743	-0.0989101	-0.148732	-0.0659637	-0.0293125	-0.0147636	0.0105253	0.0197222	0.0355045	-0.00282189	0.0307002
0.201	-0.0491291	-0.0987557	-0.150022	-0.0665395	-0.031581	-0.0126153	0.0119113	0.0199857	0.0366838	-0.0019816	0.0318243
0.202	-0.0482307	-0.0982636	-0.151569	-0.066995	-0.0339192	-0.011042	0.0136074	0.0196664	0.0373531	-0.00131426	0.0326511
0.203	-0.0471026	-0.0974548	-0.153267	-0.0671525	-0.0361194	-0.0101148	0.0159583	0.0191705	0.0372785	-0.000953385	0.033234
0.204	-0.0458759	-0.096531	-0.154987	-0.0668765	-0.0381349	-0.00998277	0.0190121	0.0191078	0.0360906	-0.000988754	0.0336062
0.205	-0.0448023	-0.0956773	-0.156601	-0.0661264	-0.0399188	-0.0106804	0.0225991	0.0199377	0.0334529	-0.00131423	0.0338898
0.206	-0.0440568	-0.0950281	-0.157976	-0.0648476	-0.0413992	-0.0120241	0.026452	0.0218241	0.0295462	-0.00171959	0.0343622
0.207	-0.0436983	-0.0947496	-0.158965	-0.0629678	-0.0424669	-0.013739	0.0303034	0.0246978	0.0249981	-0.00216885	0.0353264
0.208	-0.0437068	-0.0949938	-0.159403	-0.0605253	-0.0430133	-0.0155335	0.0338147	0.0283293	0.0203305	-0.00272618	0.0369952
0.209	-0.0440296	-0.0958061	-0.159164	-0.0576802	-0.04302	-0.0171595	0.0363863	0.0323773	0.0158865	-0.00325426	0.0392967
0.21	-0.044607	-0.0970893	-0.158264	-0.0546934	-0.0425053	-0.0184924	0.0373712	0.0364842	0.0120027	-0.00336158	0.0418508
0.211	-0.0453412	-0.0987022	-0.156789	-0.051899	-0.0415575	-0.019452	0.0366013	0.0403416	0.00889125	-0.00273528	0.0443693
0.212	-0.0461014	-0.100591	-0.154847	-0.0495028	-0.0404147	-0.0200055	0.0345443	0.0436783	0.00655181	-0.00143678	0.0469038
0.213	-0.0468264	-0.102706	-0.152626	-0.0474793	-0.0392122	-0.0202696	0.0319916	0.0463351	0.00481991	0.000284551	0.0495908
0.214	-0.047549	-0.104829	-0.150206	-0.0457564	-0.0378251	-0.0203872	0.0295973	0.0483167	0.00341124	0.00219541	0.0523459
0.215	-0.0483184	-0.106666	-0.147459	-0.0443061	-0.036126	-0.0204773	0.0276253	0.0497147	0.00210454	0.00408336	0.0549555
0.216	-0.0492141	-0.108033	-0.144322	-0.0431734	-0.0341949	-0.0206897	0.0260721	0.05058	0.000916786	0.00580576	0.0573903
0.217	-0.0502811	-0.108843	-0.140885	-0.0425241	-0.0322649	-0.021127	0.0249411	0.0508399	2.73e-05	0.0072174	0.0598309
0.218	-0.051337	-0.109056	-0.137288	-0.0424077	-0.0305491	-0.0218624	0.0243808	0.0504244	-0.000347865	0.00803973	0.062316
0.219	-0.0520732	-0.108732	-0.133835	-0.0425782	-0.0291604	-0.0229146	0.0246571	0.0494299	-8.04e-05	0.00790799	0.0644592
0.22	-0.0523073	-0.107971	-0.130997	-0.0427366	-0.0281436	-0.0242154	0.0259883	0.0481014	0.000727436	0.00675976	0.065623
0.221	-0.0520305	-0.106817	-0.129076	-0.0428029	-0.0275253	-0.0256905	0.0282507	0.0467777	0.0018892	0.00529775	0.0654403
0.222	-0.0513834	-0.105345	-0.128048	-0.0428452	-0.0273838	-0.027217	0.030935	0.045865	0.00337866	0.00452959	0.0640713
0.223	-0.0505427	-0.103793	-0.127751	-0.0428502	-0.0277477	-0.0286428	0.0335253	0.0456671	0.00519546	0.00459075	0.061878
0.224	-0.0496221	-0.102519	-0.128063	-0.0428417	-0.0284485	-0.0298048	0.0357995	0.0461724	0.00722364	0.00453186	0.058971
0.225	-0.0487586	-0.101842	-0.128866	-0.0431002	-0.0291542	-0.030514	0.0377254	0.0471317	0.00937398	0.00331149	0.0552371
0.226	-0.0480632	-0.101842	-0.130003	-0.043958	-0.0295453	-0.0306848	0.0391921	0.0482885	0.0115475	0.000508686	0.0507363
0.227	-0.0474629	-0.102291	-0.131333	-0.0455137	-0.0295482	-0.0303406	0.0400317	0.0494823	0.0135714	-0.0038407	0.045797
0.228	-0.0468351	-0.102901	-0.13273	-0.047586	-0.0293714	-0.029497	0.0403606	0.050595	0.0153973	-0.00950428	0.0409004
0.229	-0.0462362	-0.1035	-0.134007	-0.0499423	-0.0292984	-0.0281128	0.0405452	0.0513496	0.0171536	-0.0159576	0.0366097
0.23	-0.0457763	-0.103966	-0.134908	-0.052632	-0.0293606	-0.0262046	0.0407259	0.0512566	0.0189179	-0.0223112	0.0332203
0.231	-0.0453988	-0.104188	-0.135255	-0.0558913	-0.0293555	-0.0239846	0.0406522	0.0498949	0.0205787	-0.0275775	0.0305474
0.232	-0.0450085	-0.104156	-0.135078	-0.0598155	-0.0292402	-0.0217035	0.0399795	0.0471989	0.0219709	-0.0311116	0.0281182
0.233	-0.0446063	-0.103949	-0.134549	-0.0643338	-0.0291605	-0.019412	0.0386616	0.0434534	0.0230401	-0.0328105	0.025332
0.234	-0.0442107	-0.103711	-0.133868	-0.0693013	-0.0293094	-0.0170438	0.0371087	0.0390828	0.0238649	-0.0329161	0.0216899
0.235	-0.0438216	-0.103606	-0.133231	-0.0744723	-0.0299436	-0.0146879	0.0359429	0.0344687	0.0245302	-0.0318208	0.0170674
0.236	-0.0434691	-0.103656	-0.132787	-0.0794878	-0.0311969	-0.0125296	0.0354737	0.029884	0.0249102	-0.0299912	0.0116154
0.237	-0.0432795	-0.103739	-0.132638	-0.0840392	-0.0329692	-0.0106503	0.0354467	0.0255245	0.0246721	-0.0277577	0.00548622
0.238	-0.0433692	-0.1037	-0.13291	-0.0879968	-0.0351365	-0.00918788	0.0355311	0.0215428	0.0235765	-0.0252325	-0.00117923
0.239	-0.0436714	-0.103428	-0.133688	-0.0912614	-0.037644	-0.00839275	0.0357591	0.0179621	0.0216442	-0.0224882	-0.0080496
0.24	-0.044008	-0.1029	-0.134939	-0.0937465	-0.0404582	-0.00830453	0.0362116	0.0146978	0.0189443	-0.0197268	-0.0146251
0.241	-0.0443569	-0.10217	-0.1366	-0.0955197	-0.0435174	-0.00857782	0.0368025	0.0117456	0.0153693	-0.0172292	-0.0206303
0.242	-0.0448845	-0.101302	-0.138581	-0.0966903	-0.0466295	-0.00873748	0.0374869	0.00914431	0.0109006	-0.0151635	-0.0261594
0.243	-0.0456323	-0.100401	-0.14063	-0.0973486	-0.0495058	-0.0084943	0.0381494	0.00675394	0.00598488	-0.0135534	-0.0313199
0.244	-0.0464386	-0.0996268	-0.142424	-0.0976997	-0.0519247	-0.00757713	0.0384433	0.00420218	0.00136635	-0.0122915	-0.0358927
0.245	-0.047139	-0.0991146	-0.143761	-0.0980336	-0.053807	-0.00571013	0.0380754	0.00110598	-0.00236276	-0.0111516	-0.0393464
0.246	-0.0476369	-0.09892	-0.144588	-0.0984956	-0.0551652	-0.0033166	0.0369653	-0.00265235	-0.00503153	-0.00997146	-0.041281
0.247	-0.0478522	-0.0990343	-0.145012	-0.0989615	-0.0559601	-0.00151621	0.0350668	-0.00689259	-0.00688852	-0.00876423	-0.0418538
0.248	-0.0477421	-0.0993864	-0.145189	-0.0993057	-0.0561323	-0.00112864	0.0323913	-0.0113593	-0.00836867	-0.00758321	-0.0416475
0.249	-0.0473378	-0.0998023	-0.145023	-0.0997065	-0.0557856	-0.00222029	0.0293033	-0.0159116	-0.00978631	-0.00635878	-0.0413331
0.25	-0.0465903	-0.100031	-0.14421	-0.100507	-0.0551197	-0.00435438	0.0265305	-0.0204499	-0.0112141	-0.0050623	-0.041448
0.251	-0.0453305	-0.0998587	-0.142537	-0.101881	-0.0543436	-0.00710484	0.0246587	-0.0247476	-0.012623	-0.00392875	-0.0421698
0.252	-0.0434965	-0.0992303	-0.140085	-0.103667	-0.053701	-0.0103824	0.0236412	-0.0284804	-0.0139934	-0.00322778	-0.0433136
0.253	-0.0412601	-0.098325	-0.13728	-0.105469	-0.0533923	-0.0141292	0.022793	-0.0314247	-0.0152917	-0.00308296	-0.0445681
0.254	-0.0389667	-0.0974335	-0.134654	-0.106894	-0.0535011	-0.0181162	0.0213069	-0.033529	-0.0164836	-0.00349213	-0.0456095
0.255	-0.0369751	-0.0967214	-0.132582	-0.107656	-0.0539799	-0.0221521	0.0188408	-0.0348526	-0.0175632	-0.00418167	-0.0460965
0.256	-0.0356076	-0.0962215	-0.131318	-0.107561	-0.0547349	-0.0260942	0.0155053	-0.0355755	-0.0186063	-0.00475653	-0.045811
0.257	-0.0351564	-0.0959859	-0.131066	-0.106528	-0.0556801	-0.0296733	0.0114392	-0.0359608	-0.0197593	-0.00501972	-0.0447628
0.258	-0.0356459	-0.0961301	-0.131873	-0.104605	-0.0566114	-0.0324756	0.00655859	-0.0362518	-0.0210107	-0.0049171	-0.043025
0.259	-0.0367253	-0.0967203	-0.13357	-0.101995	-0.0571972	-0.0342102	0.000639081	-0.0366983	-0.0221273	-0.00440141	-0.0405999
0.26	-0.0379153	-0.0976625	-0.13586	-0.0990482	-0.0571503	-0.034944	-0.00629791	-0.0375975	-0.0229443	-0.00331576	-0.0375195
0.261	-0.0388631	-0.0987819	-0.138454	-0.0961493	-0.0563304	-0.034956	-0.0137067	-0.0391808	-0.0234285	-0.0012356	-0.0339642
0.262	-0.0395022	-0.0999468	-0.14117	-0.0936195	-0.0547416	-0.0344807	-0.0208475	-0.0414756	-0.0233782	0.00237742	-0.030206
0.263	-0.0400456	-0.101072	-0.143888	-0.0916716	-0.0524343	-0.0336567	-0.0273006	-0.0443363	-0.0224933	0.00773719	-0.0265853
0.264	-0.0407548	-0.102126	-0.146454	-0.090489	-0.0494714	-0.0325759	-0.0329075	-0.047506	-0.0208322	0.0145129	-0.0234743
0.265	-0.0416892	-0.10312	-0.148659	-0.0903151	-0.046069	-0.0313027	-0.0374426	-0.0506145	-0.0187979	0.0220365	-0.0211371
0.266	-0.0426589	-0.104031	-0.150319	-0.091369	-0.0426022	-0.0299708	-0.0406071	-0.0534344	-0.0167798	0.0297992	-0.019786
0.267	-0.0433877	-0.104826	-0.151354	-0.0936252	-0.0394409	-0.0288899	-0.0422946	-0.0560545	-0.0150448	0.0377501	-0.0195689
0.268	-0.0437554	-0.105531	-0.151841	-0.0967342	-0.0369026	-0.0284409	-0.042682	-0.0585141	-0.0137217	0.0458959	-0.0204353
0.269	-0.0438562	-0.106158	-0.151913	-0.10023	-0.0351975	-0.0288442	-0.0420964	-0.0605217	-0.0127624	0.0536192	-0.022288
0.27	-0.0438147	-0.106634	-0.151656	-0.103696	-0.0343094	-0.0300596	-0.040982	-0.0617521	-0.0120771	0.059642	-0.0251025
0.271	-0.0436913	-0.106838	-0.151124	-0.106744	-0.0340662	-0.0318984	-0.0397645	-0.0622117	-0.0116712	0.0626799	-0.0287559
0.272	-0.0435099	-0.106681	-0.150365	-0.109099	-0.0343394	-0.034141	-0.0385983	-0.0620713	-0.0114933	0.0620271	-0.0328594
0.273	-0.0432659	-0.106206	-0.14941	-0.110692	-0.0351434	-0.036483	-0.037434	-0.0612729	-0.0113086	0.0577576	-0.0367548
0.274	-0.0430446	-0.105607	-0.148194	-0.111548	-0.0365066	-0.0384914	-0.0363498	-0.0594834	-0.0108311	0.0505825	-0.0397161
0.275	-0.0430928	-0.10513	-0.146528	-0.111657	-0.0382631	-0.0398275	-0.0356342	-0.0563238	-0.00987805	0.0413605	-0.0411371
0.276	-0.0436227	-0.104877	-0.144227	-0.111007	-0.0401349	-0.0403925	-0.0355331	-0.0515182	-0.00848639	0.0308241	-0.0405193
0.277	-0.0446108	-0.104789	-0.141197	-0.109604	-0.0419374	-0.040177	-0.0360194	-0.0449245	-0.00691482	0.0199101	-0.0373991
0.278	-0.0458455	-0.104824	-0.13735	-0.107461	-0.0435103	-0.0392047	-0.036726	-0.0365876	-0.00534693	0.00995981	-0.0311828
0.279	-0.0471006	-0.104991	-0.132563	-0.104611	-0.0446373	-0.0375835	-0.0371753	-0.0266609	-0.00372796	0.00228999	-0.0211779
0.28	-0.048187	-0.105257	-0.126808	-0.101138	-0.0451303	-0.0355289	-0.0372148	-0.0153563	-0.00197349	-0.00213332	-0.00710536
0.281	-0.0488541	-0.105485	-0.120135	-0.0970857	-0.0448116	-0.0333318	-0.0370542	-0.00310175	-8.28e-05	-0.00255148	0.0106339
0.282	-0.0487693	-0.105534	-0.112489	-0.0923709	-0.0435524	-0.0312283	-0.0369168	0.00970303	0.00186755	0.00162527	0.031349
0.283	-0.047623	-0.105453	-0.103783	-0.0869457	-0.0414694	-0.029273	-0.0368958	0.0231942	0.00371709	0.0106812	0.0544596
0.284	-0.0450912	-0.105441	-0.0940329	-0.0809545	-0.0389172	-0.0273543	-0.0369369	0.0378882	0.00531053	0.0245167	0.0794217
0.285	-0.0407747	-0.105601	-0.0833743	-0.0745452	-0.0362657	-0.0254558	-0.0368024	0.0540663	0.00656651	0.0426119	0.105568
0.286	-0.0344064	-0.105786	-0.0721199	-0.067647	-0.0337167	-0.0237618	-0.0362156	0.0715876	0.0075172	0.0640843	0.132321
0.287	-0.0259806	-0.105632	-0.0606703	-0.0600641	-0.031238	-0.0224593	-0.0350372	0.090192	0.00837233	0.0879321	0.159321
0.288	-0.015605	-0.104794	-0.0492532	-0.051643	-0.0286798	-0.0216069	-0.0333299	0.109729	0.00954672	0.113248	0.186185
0.289	-0.00350441	-0.10325	-0.0379551	-0.0423885	-0.0258623	-0.0210731	-0.031293	0.130178	0.0116339	0.139144	0.212443
0.29	0.00988422	-0.101231	-0.0269384	-0.0325528	-0.0224986	-0.0205467	-0.0289953	0.151493	0.0152839	0.164857	0.237673
0.291	0.0241139	-0.0988106	-0.0163853	-0.0225393	-0.0182333	-0.0197481	-0.0263032	0.173407	0.0211974	0.190137	0.261565
0.292	0.0389243	-0.0958371	-0.0064605	-0.0126861	-0.0128206	-0.0186018	-0.0231357	0.195503	0.0301688	0.215142	0.283922
0.293	0.0541837	-0.0921951	0.00258086	-0.00316931	-0.00619947	-0.0170381	-0.019469	0.217256	0.0429126	0.23991	0.304546
0.294	0.0698137	-0.0878576	0.0104312	0.00581217	0.00160079	-0.0148057	-0.0151439	0.238012	0.0599427	0.264234	0.32314
0.295	0.0856963	-0.0827315	0.0168095	0.013817	0.0105609	-0.011636	-0.00988786	0.257133	0.0815791	0.28789	0.339475
0.296	0.101699	-0.0766488	0.0215021	0.0203165	0.0206203	-0.00739018	-0.00346738	0.274073	0.107852	0.310631	0.353478
0.297	0.117802	-0.0694543	0.024322	0.0250151	0.0315537	-0.00210499	0.00422768	0.28839	0.138387	0.332054	0.365159
0.298	0.133947	-0.061035	0.0250834	0.0278117	0.04294	0.00397431	0.0132934	0.294212	0.172533	0.351569	0.37461
0.299	0.149878	-0.0513808	0.0237221	0.0286263	0.0542671	0.0104065	0.0240209	0.277647	0.209466	0.368468	0.38206
0.3	0.16525	-0.0405924	0.0204513	0.0276573	0.0650927	0.0166086	0.0369012	0.233798	0.24808	0.382138	0.388193
0.301	0.179646	-0.028857	0.0159026	0.0256054	0.0752124	0.0221283	0.0522377	0.176788	0.287113	0.392404	0.394555
0.302	0.192541	-0.0164707	0.011258	0.0232067	0.0846029	0.0268254	0.0697308	0.125464	0.325546	0.399843	0.374731
0.303	0.203365	-0.00382201	0.00835654	-0.00617115	0.0931031	0.030572	0.0886279	0.0928601	0.362654	0.405943	0.252661
0.304	0.211664	0.00870873	0.00965187	-0.134616	0.100362	0.0330495	0.108116	0.0886707	0.397879	0.41325	-0.0148182
0.305	0.217397	0.0209436	0.0168544	-0.391437	0.106058	0.0338033	0.127517	0.12189	0.431004	0.425263	-0.363201
0.306	0.22121	0.0328913	0.0110181	-0.687163	0.109938	0.0321124	0.146426	0.165868	0.462218	0.416171	-0.676654
0.307	0.224654	0.0445617	-0.0517262	-0.891193	0.111946	0.0268134	0.164546	0.121866	0.491783	0.309122	-0.862647
0.308	0.23031	0.0559595	-0.177534	-0.928327	0.112452	0.0163017	0.181375	-0.0953787	0.519797	0.0609866	-0.87193
0.309	0.241649	0.0669889	-0.306275	-0.78907	0.111913	-0.001025	0.196338	-0.444285	0.546186	-0.264352	-0.69539
0.31	0.262638	0.0772342	-0.371248	-0.505491	0.110489	-0.0260796	0.209186	-0.793349	0.570726	-0.555194	-0.353938
0.311	0.297018	0.0861023	-0.340742	-0.129498	0.108247	-0.0590804	0.220078	-1.02256	0.592984	-0.724572	0.113082
0.312	0.34724	0.0931653	-0.214156	0.283368	0.105494	-0.100253	0.229348	-1.06492	0.612406	-0.7272	0.658377
0.313	0.413298	0.0982603	-0.0109388	0.684273	0.103011	-0.150379	0.237262	-0.903991	0.628916	-0.555655	1.23454
0.314	0.492153	0.101418	0.239676	1.03602	0.102329	-0.234963	0.243956	-0.561066	0.643456	-0.230521	1.79925
0.315	0.578365	0.102785	0.506468	1.31431	0.10576	-0.407825	0.250391	-0.0808431	0.628712	0.210433	2.31881
0.316	0.665405	0.102669	0.761308	1.50675	0.115901	-0.663475	0.258608	0.481333	0.510902	0.721823	2.76999
0.317	0.747032	0.101799	0.982022	1.61097	0.134548	-0.90282	0.26888	1.06931	0.242424	1.25822	3.14019
0.318	0.818605	0.101697	1.15395	1.63295	0.142777	-1.02775	0.278462	1.63319	-0.139714	1.77941	3.42638
0.319	0.877792	0.104877	1.27072	1.5854	0.101315	-1.00224	0.256862	2.13426	-0.539031	2.25361	3.63273
0.32	0.924268	0.114489	1.33406	1.48626	0.0212795	-0.8394	0.128246	2.54769	-0.843601	2.65911	3.76759
0.321	0.95875	0.133617	1.35205	1.35626	-0.0187123	-0.579967	-0.147407	2.86273	-0.99708	2.98433	3.84083
0.322	0.982067	0.164592	1.33576	1.21508	0.0470077	-0.276017	-0.502299	3.08028	-1.03181	3.22663	3.8627
0.323	0.994753	0.208213	1.29627	1.07817	0.230946	0.020926	-0.818193	3.20883	-0.982811	3.39013	3.84326
0.324	0.997541	0.263075	1.24326	0.955808	0.509539	0.267644	-1.00242	3.26081	-0.827511	3.48343	3.7922
0.325	0.992227	0.325711	1.18503	0.854062	0.842253	0.432994	-1.00842	3.25083	-0.53604	3.51748	3.71905
0.326	0.981595	0.391522	1.12867	0.776463	1.18494	0.498956	-0.831741	3.19503	-0.110491	3.50419	3.63338
0.327	0.9684	0.455807	1.08011	0.72538	1.49805	0.460544	-0.49834	3.10997	0.422185	3.4558	3.54451
0.328	0.954925	0.514691	1.04413	0.702282	1.75143	0.323968	-0.051699	3.01117	1.02138	3.38466	3.46106
0.329	0.943655	0.565566	1.02434	0.707011	1.92688	0.103372	0.458158	2.9125	1.64212	3.30302	3.38985
0.33	0.937773	0.606816	1.0227	0.737134	2.01887	-0.183273	0.983042	2.8257	2.242	3.22219	3.33441
0.331	0.940487	0.637285	1.03953	0.787878	2.03327	-0.518427	1.48209	2.7592	2.78596	3.15142	3.29403
0.332	0.953979	0.655919	1.07374	0.852901	1.98391	-0.886859	1.92405	2.7171	3.24887	3.09688	3.26422
0.333	0.979255	0.661866	1.12293	0.925637	1.88777	-1.27559	2.28743	2.69912	3.61629	3.06084	3.23819
0.334	1.01678	0.655081	1.18337	0.999914	1.76107	-1.67481	2.56025	2.7015	3.88385	3.04182	3.20887
0.335	1.0669	0.636895	1.25041	1.07015	1.61788	-2.079	2.73967	2.71845	4.05559	3.03564	3.17051
0.336	1.12968	0.610271	1.31928	1.13194	1.47045	-2.48197	2.83169	2.74333	4.14142	3.03683	3.1192
0.337	1.20449	0.579729	1.38557	1.18236	1.32991	-2.86897	2.85039	2.76939	4.15493	3.03989	3.05281
0.338	1.28978	0.550899	1.4451	1.2195	1.20663	-3.22125	2.81588	2.78996	4.11233	3.03983	2.97055
0.339	1.38319	0.529653	1.49359	1.24193	1.10959	-3.5311	2.75022	2.79802	4.03169	3.0322	2.87221
0.34	1.48149	0.521017	1.52665	1.24821	1.04511	-3.80995	2.67282	2.78593	3.93135	3.01283	2.75744
0.341	1.58069	0.52835	1.53989	1.23666	1.0155	-4.08017	2.59779	2.74574	3.82795	2.97772	2.62493
0.342	1.67624	0.553252	1.52923	1.20539	1.01852	-4.35323	2.53414	2.66957	3.73436	2.92318	2.47197
0.343	1.76263	0.596193	1.49063	1.15244	1.04808	-4.6166	2.48737	2.54946	3.65826	2.84622	2.29443
0.344	1.83307	0.657022	1.41972	1.07584	1.09596	-4.84662	2.46104	2.37762	3.60159	2.74458	2.0871
0.345	1.88023	0.734593	1.31193	0.97385	1.15331	-5.02693	2.45737	2.14734	3.56163	2.61631	1.8441
0.346	1.89727	0.825886	1.16348	0.84507	1.21195	-5.15343	2.47673	1.85439	3.53307	2.45962	1.55992
0.347	1.8786	0.92612	0.972284	0.688807	1.26519	-5.23175	2.51703	1.49898	3.51013	2.27293	1.23119
0.348	1.82008	1.03022	0.739321	0.505754	1.30803	-5.27284	2.57399	1.08723	3.48751	2.05532	0.858549
0.349	1.7188	1.13397	0.470099	0.298938	1.33682	-5.2892	2.64226	0.631017	3.46047	1.80755	0.447472
0.35	1.57274	1.23383	0.174705	0.0743931	1.349	-5.29411	2.71646	0.14693	3.42448	1.53198	0.00794374
0.351	1.38084	1.32617	-0.133453	-0.158974	1.3428	-5.30013	2.79144	-0.345531	3.37471	1.22847	-0.446498
0.352	1.14332	1.40717	-0.439397	-0.390419	1.31681	-5.31344	2.86254	-0.825922	3.30544	0.890477	-0.900119
0.353	0.862566	1.47323	-0.728501	-0.608839	1.2698	-5.32732	2.92593	-1.27466	3.20971	0.508867	-1.33642
0.354	0.544141	1.52126	-0.987993	-0.804127	1.20069	-5.32109	2.97864	-1.67463	3.07926	0.080121	-1.73976
0.355	0.197423	1.54869	-1.20782	-0.968349	1.10859	-5.2703	3.01812	-2.01258	2.90479	-0.389055	-2.0967
0.356	-0.164628	1.55314	-1.38135	-1.09654	0.992153	-5.16024	3.04156	-2.27984	2.67672	-0.882043	-2.39671
0.357	-0.52669	1.53218	-1.50571	-1.18664	0.849123	-4.98922	3.04542	-2.47247	2.38595	-1.37532	-2.63279
0.358	-0.872791	1.48367	-1.5814	-1.23899	0.678615	-4.76389	3.02524	-2.59102	2.02547	-1.84242	-2.80197
0.359	-1.188	1.4058	-1.61158	-1.25614	0.483021	-4.49784	2.97556	-2.63956	1.59324	-2.25784	-2.90496
0.36	-1.45982	1.29687	-1.6015	-1.24252	0.267192	-4.21204	2.88997	-2.62474	1.09449	-2.60047	-2.94547
0.361	-1.6792	1.15543	-1.55789	-1.20388	0.0379622	-3.92835	2.76155	-2.55545	0.541976	-2.85596	-2.92955
0.362	-1.84099	0.980684	-1.48817	-1.14646	-0.195711	-3.66055	2.5834	-2.44191	-0.0452428	-3.01768	-2.86506
0.363	-1.94416	0.773047	-1.3998	-1.0764	-0.423508	-3.41105	2.34909	-2.2949	-0.643878	-3.08646	-2.76093
0.364	-1.99129	0.535011	-1.29976	-0.999378	-0.634994	-3.17345	2.05392	-2.1252	-1.22906	-3.0697	-2.62655
0.365	-1.98778	0.272035	-1.19419	-0.920248	-0.82104	-2.93824	1.69714	-1.943	-1.77682	-2.97966	-2.47108
0.366	-1.94091	-0.00728168	-1.08821	-0.842966	-0.974956	-2.69779	1.28388	-1.75713	-2.26619	-2.83204	-2.30296
0.367	-1.85894	-0.291925	-0.98603	-0.770497	-1.09271	-2.44898	0.825432	-1.57471	-2.68083	-2.64448	-2.12964
0.368	-1.75037	-0.569735	-0.890897	-0.704864	-1.17281	-2.19362	0.337949	-1.40125	-3.00996	-2.43357	-1.95731
0.369	-1.62357	-0.828743	-0.805143	-0.647347	-1.21623	-1.93733	-0.159515	-1.24063	-3.24858	-2.21268	-1.79072
0.37	-1.48652	-1.05833	-0.730206	-0.598438	-1.22602	-1.68761	-0.647026	-1.09504	-3.39709	-1.99256	-1.63327
0.371	-1.34632	-1.25025	-0.666596	-0.557717	-1.20672	-1.45215	-1.10538	-0.965187	-3.46037	-1.78168	-1.48719
0.372	-1.20878	-1.39925	-0.613919	-0.524195	-1.16384	-1.23741	-1.51757	-0.850789	-3.44671	-1.58605	-1.35357
0.373	-1.07819	-1.50316	-0.570988	-0.496776	-1.1035	-1.04751	-1.87014	-0.751034	-3.36693	-1.40942	-1.23265
0.374	-0.957485	-1.56259	-0.53615	-0.474395	-1.03176	-0.884277	-2.15399	-0.664891	-3.23343	-1.25339	-1.12395
0.375	-0.848561	-1.58055	-0.507798	-0.456015	-0.954037	-0.747711	-2.36497	-0.590947	-3.0592	-1.11769	-1.02648
0.376	-0.752372	-1.562	-0.484548	-0.440674	-0.87492	-0.636237	-2.5036	-0.527311	-2.85696	-1.00106	-0.939182
0.377	-0.668903	-1.51327	-0.465146	-0.427562	-0.798033	-0.547253	-2.57345	-0.472039	-2.63835	-0.901819	-0.861113
0.378	-0.59746	-1.44132	-0.448512	-0.416111	-0.725809	-0.47772	-2.58022	-0.42349	-2.41327	-0.817959	-0.79133
0.379	-0.536918	-1.35305	-0.433816	-0.405855	-0.659721	-0.424298	-2.53169	-0.380457	-2.18987	-0.747132	-0.728819
0.38	-0.485951	-1.25496	-0.42044	-0.396306	-0.600638	-0.383468	-2.43748	-0.342215	-1.97467	-0.687013	-0.67257
0.381	-0.443192	-1.15282	-0.407981	-0.387109	-0.54886	-0.35194	-2.30817	-0.308277	-1.77248	-0.635618	-0.621669
0.382	-0.407159	-1.05139	-0.396157	-0.378068	-0.504221	-0.326798	-2.15439	-0.278199	-1.58652	-0.591227	-0.575411
0.383	-0.376343	-0.954379	-0.384559	-0.369099	-0.466262	-0.305568	-1.98591	-0.2516	-1.41861	-0.552304	-0.533255
0.384	-0.349428	-0.864585	-0.372678	-0.360274	-0.434359	-0.286499	-1.81123	-0.228115	-1.26924	-0.517668	-0.494746
0.385	-0.325369	-0.783739	-0.360197	-0.351801	-0.407946	-0.268535	-1.63746	-0.207349	-1.13797	-0.486574	-0.459585
0.386	-0.303416	-0.712619	-0.347141	-0.343934	-0.386438	-0.251073	-1.47012	-0.188855	-1.02358	-0.458659	-0.427631
0.387	-0.283139	-0.651287	-0.3339	-0.336877	-0.368942	-0.233832	-1.31326	-0.172123	-0.924336	-0.433843	-0.39873
0.388	-0.264304	-0.599207	-0.321095	-0.330707	-0.354322	-0.216665	-1.16975	-0.156769	-0.83834	-0.412087	-0.372593
0.389	-0.246698	-0.555496	-0.309378	-0.325302	-0.341645	-0.199372	-1.04125	-0.14273	-0.763665	-0.393187	-0.348886
0.39	-0.230083	-0.519213	-0.299392	-0.320412	-0.330364	-0.18182	-0.928308	-0.130117	-0.698353	-0.376686	-0.327279
0.391	-0.214309	-0.48933	-0.291584	-0.315832	-0.320157	-0.164106	-0.830638	-0.118783	-0.6407	-0.361929	-0.3074
0.392	-0.199377	-0.464577	-0.286035	-0.311413	-0.310867	-0.146479	-0.747219	-0.108278	-0.58931	-0.348314	-0.288893
0.393	-0.18533	-0.443562	-0.28258	-0.307078	-0.30234	-0.129277	-0.676245	-0.0983337	-0.542952	-0.335377	-0.271502
0.394	-0.172192	-0.42512	-0.280838	-0.302865	-0.294239	-0.112801	-0.615517	-0.089092	-0.500644	-0.322678	-0.255006
0.395	-0.160001	-0.408454	-0.280164	-0.298794	-0.286254	-0.097095	-0.563024	-0.0807814	-0.461728	-0.309857	-0.239205
0.396	-0.14877	-0.393001	-0.279733	-0.294873	-0.278172	-0.0821523	-0.517094	-0.0735795	-0.425661	-0.296772	-0.224104
0.397	-0.138487	-0.378298	-0.278724	-0.291179	-0.269799	-0.0682456	-0.476235	-0.0676019	-0.391819	-0.283488	-0.209934
0.398	-0.129132	-0.364057	-0.276607	-0.287712	-0.261091	-0.0557804	-0.439116	-0.0628211	-0.359618	-0.270182	-0.196863
0.399	-0.120691	-0.350231	-0.273297	-0.284389	-0.252196	-0.0450634	-0.40479	-0.0592568	-0.328816	-0.257064	-0.184914
0.4	-0.113169	-0.336916	-0.26891	-0.281198	-0.243371	-0.0362375	-0.372737	-0.0570522	-0.299676	-0.244251	-0.174107
0.401	-0.106541	-0.32422	-0.263591	-0.278129	-0.234974	-0.0292065	-0.342616	-0.0562402	-0.272805	-0.231852	-0.1646
0.402	-0.100689	-0.312122	-0.25758	-0.275048	-0.227315	-0.0236743	-0.314246	-0.0566581	-0.248658	-0.220151	-0.156627
0.403	-0.0954527	-0.300521	-0.251241	-0.271881	-0.220384	-0.0193208	-0.287708	-0.0579331	-0.227298	-0.209442	-0.150288
0.404	-0.0907282	-0.289504	-0.244918	-0.26868	-0.213896	-0.0159659	-0.263155	-0.0594524	-0.208614	-0.199801	-0.145505
0.405	-0.086382	-0.279281	-0.238817	-0.265515	-0.207654	-0.0136008	-0.240707	-0.0606223	-0.192388	-0.191199	-0.142131
0.406	-0.0822452	-0.269919	-0.233093	-0.262477	-0.201738	-0.0121718	-0.22059	-0.0611579	-0.178339	-0.183642	-0.139906
0.407	-0.0782734	-0.26136	-0.227917	-0.259657	-0.196391	-0.0114097	-0.203076	-0.0609254	-0.166349	-0.177149	-0.138415
0.408	-0.0745572	-0.253603	-0.223401	-0.257016	-0.191827	-0.0110399	-0.188178	-0.0596709	-0.156318	-0.171675	-0.137261
0.409	-0.0711743	-0.246688	-0.219513	-0.254402	-0.188018	-0.0109569	-0.175561	-0.0572118	-0.147894	-0.167049	-0.136164
0.41	-0.0681221	-0.240577	-0.216031	-0.25174	-0.18462	-0.0110677	-0.164735	-0.0537591	-0.140574	-0.163065	-0.134939
0.411	-0.0653367	-0.235076	-0.212696	-0.249089	-0.18124	-0.0111984	-0.155189	-0.04982	-0.133888	-0.159717	-0.133411
0.412	-0.0626467	-0.229927	-0.209407	-0.246525	-0.177727	-0.0111952	-0.146435	-0.0459172	-0.127441	-0.157035	-0.131444
0.413	-0.0598109	-0.224995	-0.206102	-0.244023	-0.174139	-0.011024	-0.138073	-0.0424735	-0.120992	-0.154801	-0.129076
0.414	-0.0567717	-0.22025	-0.202686	-0.241509	-0.170562	-0.0107707	-0.129809	-0.0398536	-0.114511	-0.152739	-0.126445
0.415	-0.0537697	-0.215701	-0.199182	-0.238954	-0.166999	-0.0105275	-0.12147	-0.038397	-0.10818	-0.150725	-0.123576
0.416	-0.0511233	-0.211361	-0.195682	-0.236371	-0.163564	-0.0103258	-0.113042	-0.0382536	-0.102325	-0.14874	-0.120411
0.417	-0.0489487	-0.207173	-0.192159	-0.233898	-0.16057	-0.0102697	-0.104599	-0.0392298	-0.0972611	-0.146854	-0.117055
0.418	-0.0471358	-0.203144	-0.188497	-0.231738	-0.158257	-0.0106217	-0.096194	-0.0409235	-0.0931805	-0.145184	-0.113804
0.419	-0.0455344	-0.19944	-0.184692	-0.229878	-0.156638	-0.0115652	-0.087889	-0.0428961	-0.0901095	-0.143875	-0.111031
0.42	-0.044051	-0.19619	-0.180891	-0.228095	-0.155545	-0.0130927	-0.0799337	-0.0447534	-0.088005	-0.143054	-0.109054
0.421	-0.0426324	-0.193345	-0.177295	-0.226178	-0.154761	-0.0152188	-0.0727866	-0.0462508	-0.0867401	-0.142705	-0.107986
0.422	-0.0412298	-0.190819	-0.174086	-0.224	-0.154238	-0.0179062	-0.0669068	-0.0473051	-0.0860233	-0.142672	-0.107693
0.423	-0.0397777	-0.188554	-0.171383	-0.221502	-0.154164	-0.0209345	-0.062545	-0.0478926	-0.08555	-0.142797	-0.107969
0.424	-0.0382631	-0.186463	-0.169134	-0.218712	-0.154724	-0.0240812	-0.0597051	-0.0479798	-0.0851029	-0.142902	-0.108532
0.425	-0.0367446	-0.184459	-0.167007	-0.215676	-0.15576	-0.0270246	-0.058357	-0.0475404	-0.0845512	-0.142833	-0.108893
0.426	-0.0352266	-0.18246	-0.164594	-0.212423	-0.156818	-0.0292536	-0.0585475	-0.046712	-0.083937	-0.142658	-0.108544
0.427	-0.0336652	-0.180339	-0.161731	-0.209001	-0.157416	-0.0304411	-0.0601006	-0.0458901	-0.0833313	-0.142533	-0.10721
0.428	-0.0320902	-0.177972	-0.158574	-0.205402	-0.157237	-0.030622	-0.0624891	-0.045492	-0.0826001	-0.142454	-0.104872
0.429	-0.0305668	-0.17538	-0.155401	-0.201568	-0.156224	-0.0300535	-0.0652384	-0.0457248	-0.0815288	-0.14236	-0.101767
0.43	-0.0291028	-0.172718	-0.152368	-0.197634	-0.154516	-0.0291306	-0.0681019	-0.0465715	-0.0800665	-0.142249	-0.0982987
0.431	-0.0276101	-0.170095	-0.149524	-0.194008	-0.15229	-0.0282063	-0.0708186	-0.0478208	-0.078365	-0.142142	-0.0948566
0.432	-0.0259584	-0.167531	-0.146959	-0.191081	-0.149752	-0.0274534	-0.0732617	-0.0491961	-0.0766654	-0.142065	-0.0917383
0.433	-0.0240791	-0.164961	-0.144691	-0.18905	-0.147155	-0.0270207	-0.0756837	-0.0504752	-0.0751425	-0.142028	-0.0891789
0.434	-0.0219914	-0.162279	-0.142548	-0.187931	-0.14474	-0.0270837	-0.0782138	-0.051457	-0.0738676	-0.142021	-0.0873283
0.435	-0.0197821	-0.159493	-0.140301	-0.187554	-0.142685	-0.0276674	-0.0804669	-0.051963	-0.0728784	-0.142106	-0.0862909
0.436	-0.0175503	-0.156649	-0.13776	-0.187624	-0.141077	-0.0286534	-0.0818949	-0.0519248	-0.0722201	-0.142363	-0.0862031
0.437	-0.0154033	-0.153678	-0.134839	-0.187774	-0.139952	-0.030016	-0.0820958	-0.0512844	-0.0719981	-0.142895	-0.0870703
0.438	-0.0134699	-0.150526	-0.131696	-0.187573	-0.139388	-0.0318364	-0.0809205	-0.0500181	-0.0723329	-0.144323	-0.088636
0.439	-0.011746	-0.147307	-0.128653	-0.186702	-0.139411	-0.034043	-0.0784802	-0.0484489	-0.0732393	-0.147501	-0.0905373
0.44	-0.0100972	-0.144206	-0.125966	-0.185159	-0.139838	-0.0363872	-0.0750355	-0.0468402	-0.0746008	-0.152258	-0.0923992
0.441	-0.00851335	-0.14128	-0.123727	-0.183106	-0.14037	-0.0385937	-0.070966	-0.0448989	-0.076311	-0.157331	-0.093848
0.442	-0.00702432	-0.138349	-0.121837	-0.180626	-0.140777	-0.040454	-0.0667298	-0.0424664	-0.07847	-0.161336	-0.0947142
0.443	-0.00548319	-0.135159	-0.120113	-0.177846	-0.140838	-0.0418975	-0.0627506	-0.039998	-0.0811609	-0.16319	-0.0950436
0.444	-0.00370684	-0.131641	-0.118398	-0.175057	-0.140346	-0.0428947	-0.0593222	-0.0379866	-0.0839985	-0.162221	-0.0948072
0.445	-0.00166703	-0.127911	-0.11656	-0.172486	-0.139296	-0.0434299	-0.0565658	-0.0366129	-0.0862417	-0.158421	-0.0938608
0.446	0.000446603	-0.124149	-0.114634	-0.170141	-0.137834	-0.0436406	-0.0544896	-0.0358561	-0.0872623	-0.152378	-0.0921087
0.447	0.00232652	-0.120546	-0.112822	-0.167997	-0.136074	-0.0437793	-0.0530396	-0.0354883	-0.0866603	-0.144887	-0.0897379
0.448	0.0038487	-0.117254	-0.111202	-0.166173	-0.133955	-0.0441676	-0.0520737	-0.035322	-0.0841825	-0.136708	-0.0872964
0.449	0.00514099	-0.11428	-0.109676	-0.164796	-0.131313	-0.0452589	-0.0514362	-0.0355962	-0.0799119	-0.1285	-0.0852525
0.45	0.0063389	-0.111366	-0.108119	-0.163901	-0.128252	-0.0473996	-0.0511148	-0.0367043	-0.0743776	-0.120851	-0.0836981
0.451	0.00757703	-0.108227	-0.106478	-0.163427	-0.125188	-0.0504057	-0.0511635	-0.0387585	-0.0681559	-0.114357	-0.0825633
0.452	0.00903684	-0.104853	-0.104845	-0.163137	-0.122545	-0.0536312	-0.0515676	-0.0416468	-0.0615025	-0.109397	-0.0817992
0.453	0.0107475	-0.101378	-0.103428	-0.16273	-0.120565	-0.0564433	-0.0523689	-0.0450638	-0.0545368	-0.105911	-0.0813807
0.454	0.0125845	-0.0978696	-0.102407	-0.162051	-0.119263	-0.0585217	-0.0537246	-0.0485378	-0.0476	-0.103737	-0.0812208
0.455	0.0144147	-0.0943706	-0.101874	-0.161073	-0.118609	-0.0598796	-0.0556856	-0.0517553	-0.0412852	-0.102901	-0.0811606
0.456	0.016111	-0.0909139	-0.101906	-0.159843	-0.118713	-0.0607301	-0.0579971	-0.0545466	-0.0362918	-0.103352	-0.0811296
0.457	0.0175991	-0.0874512	-0.102582	-0.158399	-0.119673	-0.061427	-0.0602787	-0.0565998	-0.0332361	-0.104798	-0.0811607
0.458	0.01887	-0.0839786	-0.103921	-0.156642	-0.121338	-0.0624402	-0.0623198	-0.0576495	-0.0322887	-0.10679	-0.0812329
0.459	0.0198856	-0.0806906	-0.105808	-0.154494	-0.123353	-0.0640901	-0.0640153	-0.0578502	-0.0330975	-0.108878	-0.0812281
0.46	0.0206217	-0.0778416	-0.107922	-0.152066	-0.125368	-0.0663494	-0.0652467	-0.0576483	-0.0352158	-0.110761	-0.0809758
0.461	0.0211856	-0.0755	-0.10991	-0.149469	-0.127145	-0.0689175	-0.0658445	-0.0573813	-0.0382875	-0.112308	-0.0802214
0.462	0.0217074	-0.0735626	-0.11158	-0.146705	-0.128516	-0.0713525	-0.0655169	-0.0571474	-0.0418937	-0.113461	-0.078682
0.463	0.0221797	-0.07195	-0.11285	-0.143799	-0.12932	-0.0733216	-0.0640564	-0.0568892	-0.0456523	-0.114186	-0.0763154
0.464	0.0225759	-0.070636	-0.113748	-0.140822	-0.129382	-0.0747498	-0.0616904	-0.0565596	-0.0493408	-0.114472	-0.0734538
0.465	0.0230452	-0.0695338	-0.114381	-0.137859	-0.128602	-0.075674	-0.0589644	-0.0562062	-0.0528092	-0.114387	-0.0706359
0.466	0.0237868	-0.06848	-0.114834	-0.135032	-0.12709	-0.0762156	-0.0562727	-0.0558618	-0.0559785	-0.114147	-0.0683001
0.467	0.0247899	-0.0673648	-0.115253	-0.13244	-0.12509	-0.0766038	-0.0537319	-0.0554734	-0.0588179	-0.114205	-0.0665397
0.468	0.0258646	-0.0662194	-0.115826	-0.130135	-0.122775	-0.0770129	-0.0514274	-0.0548763	-0.0611898	-0.115133	-0.0651976
0.469	0.0268312	-0.0651501	-0.116702	-0.128101	-0.120288	-0.0775602	-0.0495669	-0.05384	-0.0629591	-0.116978	-0.0641281
0.47	0.0275639	-0.0642279	-0.117994	-0.126217	-0.117855	-0.0784761	-0.0483141	-0.0522145	-0.0642342	-0.119098	-0.063238
0.471	0.0279994	-0.063518	-0.119732	-0.124326	-0.11567	-0.0799934	-0.047611	-0.0499634	-0.0651506	-0.120731	-0.0624374
0.472	0.0282077	-0.0631427	-0.121835	-0.122321	-0.113782	-0.08209	-0.0473469	-0.0470484	-0.065608	-0.121204	-0.0616662
0.473	0.0282999	-0.0631601	-0.124244	-0.120166	-0.112149	-0.0845647	-0.0475168	-0.0434589	-0.0654752	-0.119886	-0.0608476
0.474	0.028308	-0.0634962	-0.127037	-0.117881	-0.110768	-0.0872353	-0.0480961	-0.039389	-0.0647612	-0.116381	-0.0598108
0.475	0.0282232	-0.0640202	-0.130263	-0.115479	-0.109726	-0.0899241	-0.0489998	-0.0352304	-0.0635326	-0.110791	-0.0583708
0.476	0.0280517	-0.0646804	-0.133739	-0.113001	-0.109116	-0.0924531	-0.050147	-0.0314956	-0.0618597	-0.103619	-0.056491
0.477	0.0278493	-0.0655781	-0.137194	-0.11062	-0.108946	-0.0947127	-0.0514025	-0.0286787	-0.0597164	-0.09547	-0.0543323
0.478	0.0276325	-0.0668473	-0.140473	-0.108552	-0.109151	-0.0965843	-0.052547	-0.0269288	-0.0568584	-0.0869114	-0.052057
0.479	0.0273468	-0.0685241	-0.143478	-0.106943	-0.109537	-0.101547	-0.0532344	-0.0260264	-0.0530487	-0.0784328	-0.0496833
0.48	0.0270493	-0.0704822	-0.146109	-0.105832	-0.109677	-0.118397	-0.0530088	-0.025787	-0.048282	-0.0704655	-0.0472557
0.481	0.026934	-0.0725378	-0.148228	-0.105198	-0.109124	-0.149906	-0.0516155	-0.0262209	-0.0426325	-0.0633955	-0.0449394
0.482	0.0271006	-0.0745693	-0.149628	-0.104995	-0.1078	-0.186528	-0.049179	-0.0272991	-0.0363267	-0.0574601	-0.0428643
0.483	0.0274827	-0.0764126	-0.150222	-0.105123	-0.105975	-0.216783	-0.0460733	-0.0288499	-0.0298936	-0.052737	-0.0409972
0.484	0.0279519	-0.0779375	-0.150216	-0.105367	-0.103987	-0.234627	-0.0427335	-0.0306233	-0.0237882	-0.0492653	-0.0392026
0.485	0.0283211	-0.0792075	-0.150035	-0.105436	-0.10211	-0.238461	-0.0394041	-0.0322823	-0.018217	-0.0470625	-0.0374257
0.486	0.0284403	-0.0803131	-0.150121	-0.105131	-0.100548	-0.229426	-0.0360583	-0.0333587	-0.0134507	-0.0460586	-0.0357386
0.487	0.0282976	-0.0813027	-0.150743	-0.104487	-0.099351	-0.210292	-0.0327138	-0.033391	-0.00980851	-0.0460818	-0.0342071
0.488	0.0280101	-0.0823055	-0.151946	-0.103627	-0.0984033	-0.184569	-0.029675	-0.0322774	-0.00748209	-0.0468684	-0.032836
0.489	0.0277993	-0.0834391	-0.153616	-0.102577	-0.0975941	-0.155707	-0.0273216	-0.0302585	-0.00656064	-0.048142	-0.0316124
0.49	0.0277665	-0.0847516	-0.155413	-0.101271	-0.0969017	-0.126591	-0.0258657	-0.0275721	-0.00690885	-0.0495906	-0.0304715
0.491	0.0278169	-0.0862103	-0.156564	-0.0995768	-0.0963073	-0.0994741	-0.0253366	-0.0245006	-0.00816475	-0.0507876	-0.0293387
0.492	0.0279023	-0.0875932	-0.156174	-0.0973457	-0.0957499	-0.0760181	-0.0254971	-0.0214946	-0.00996582	-0.0513388	-0.0282585
0.493	0.0280421	-0.0886455	-0.15395	-0.0946153	-0.0951607	-0.0572158	-0.0258325	-0.0189176	-0.0119891	-0.0510607	-0.0273427
0.494	0.0281808	-0.0892742	-0.150409	-0.0916432	-0.0944952	-0.0433158	-0.0258787	-0.0168726	-0.0139639	-0.0500589	-0.0265539
0.495	0.0282007	-0.0894722	-0.146542	-0.088716	-0.093807	-0.0339458	-0.0254935	-0.0153715	-0.0157104	-0.0486763	-0.0255854
0.496	0.0280216	-0.0892893	-0.143355	-0.0860738	-0.0932065	-0.0285105	-0.0246974	-0.0144045	-0.0170606	-0.0472418	-0.0240179
0.497	0.0276945	-0.0889256	-0.141505	-0.0839411	-0.0926253	-0.0264772	-0.0235202	-0.0139203	-0.0178733	-0.0458079	-0.0216124
0.498	0.0273295	-0.088635	-0.141207	-0.082503	-0.0918386	-0.0273391	-0.0221373	-0.0140225	-0.0181234	-0.0442181	-0.0183773
0.499	0.0269655	-0.0884939	-0.142363	-0.0818089	-0.0907466	-0.030557	-0.0207907	-0.0148915	-0.0178564	-0.0423545	-0.0144264
0.5	0.0266685	-0.088445	-0.144725	-0.0816862	-0.0893778	-0.0355364	-0.019543	-0.0164554	-0.0172056	-0.0402236	-0.010012
0.501	0.0265822	-0.0884686	-0.147949	-0.0817845	-0.087735	-0.0415529	-0.018277	-0.0181697	-0.0163864	-0.0380507	-0.00556981
0.502	0.0268193	-0.0885623	-0.151698	-0.081756	-0.0859057	-0.0477496	-0.0169069	-0.0188314	-0.0154885	-0.036263	-0.00147893
0.503	0.0274462	-0.0886469	-0.155748	-0.0814333	-0.0842257	-0.053381	-0.0155692	-0.0170558	-0.0145027	-0.0352507	0.00207782
0.504	0.0284792	-0.0886277	-0.159888	-0.0807525	-0.0830586	-0.0581066	-0.0145075	-0.0122987	-0.0135249	-0.0351885	0.00497426
0.505	0.0298887	-0.0885205	-0.163802	-0.0795884	-0.0824745	-0.0619241	-0.013905	-0.00520341	-0.0126428	-0.0359059	0.0070211
0.506	0.0315313	-0.0883444	-0.167139	-0.077841	-0.0823682	-0.0647922	-0.0138927	0.00295008	-0.0117185	-0.0369951	0.00800747
0.507	0.0330435	-0.0880009	-0.169695	-0.0755247	-0.0826255	-0.0665104	-0.0144866	0.0109608	-0.0105359	-0.0381671	0.00785634
0.508	0.0340443	-0.0873835	-0.171448	-0.0727701	-0.0829976	-0.0669654	-0.0154967	0.0180381	-0.00904965	-0.0392596	0.00676476
0.509	0.0344102	-0.0864902	-0.172376	-0.0698028	-0.0831029	-0.0662087	-0.0166313	0.0236785	-0.00731838	-0.0400163	0.00512259
0.51	0.0342743	-0.085437	-0.172395	-0.0668661	-0.0826315	-0.0644227	-0.0177034	0.0274595	-0.00536895	-0.0402218	0.00324216
0.511	0.0338483	-0.0843501	-0.171494	-0.0642607	-0.0814704	-0.061973	-0.0186265	0.0291897	-0.00314625	-0.0397791	0.00139123
0.512	0.0332681	-0.0831898	-0.169667	-0.0622434	-0.0796276	-0.0592266	-0.0193126	0.0289854	-0.000517314	-0.0385164	-1.62e-05
0.513	0.0326217	-0.0817132	-0.166946	-0.0608114	-0.0771053	-0.0563492	-0.0196646	0.0270372	0.00253563	-0.0363419	-0.000628238
0.514	0.0320649	-0.0796908	-0.163597	-0.0598213	-0.0739071	-0.0533511	-0.0195754	0.0236087	0.00583136	-0.0335572	-0.00029159
0.515	0.0317845	-0.0771726	-0.159878	-0.0591678	-0.07013	-0.0502349	-0.0190235	0.0191339	0.00917168	-0.0306875	0.00104669
0.516	0.0318495	-0.0744212	-0.155831	-0.058831	-0.0661169	-0.0474334	-0.0181208	0.0142104	0.0124083	-0.0281714	0.00320074
0.517	0.0321856	-0.0717011	-0.151551	-0.0588208	-0.0624591	-0.0460377	-0.0168769	0.00954482	0.0153902	-0.0262937	0.00572345
0.518	0.0327052	-0.0692377	-0.147315	-0.0589216	-0.0596599	-0.047276	-0.0151022	0.00568271	0.0179578	-0.0251669	0.00821705
0.519	0.0333951	-0.0671771	-0.14339	-0.0586984	-0.0578584	-0.0521086	-0.0127235	0.00276996	0.0198528	-0.0247944	0.0105009
0.52	0.03425	-0.0655464	-0.139879	-0.057895	-0.0569622	-0.0612768	-0.0100047	0.000676086	0.0206892	-0.0250443	0.0124728
0.521	0.0352287	-0.0642879	-0.136814	-0.0566009	-0.0569242	-0.0751978	-0.007387	-0.000733866	0.0202997	-0.025428	0.0139379
0.522	0.0363067	-0.0632652	-0.134243	-0.0549895	-0.0578151	-0.0937578	-0.0052778	-0.00152474	0.018995	-0.0252416	0.0146793
0.523	0.0374401	-0.0622388	-0.132175	-0.0531189	-0.0596595	-0.116904	-0.00387052	-0.00171122	0.0172639	-0.0239701	0.0146508
0.524	0.0385606	-0.0609875	-0.130509	-0.0509983	-0.0622364	-0.14709	-0.00310638	-0.00120105	0.0154418	-0.0213712	0.013973
0.525	0.0397038	-0.0595193	-0.129098	-0.0485571	-0.0650593	-0.191066	-0.00298115	7.83e-05	0.013699	-0.0174482	0.0128168
0.526	0.0409771	-0.057983	-0.127759	-0.0456689	-0.0675492	-0.257102	-0.00366042	0.00198055	0.0121742	-0.0124352	0.0114681
0.527	0.0424348	-0.0563807	-0.126236	-0.0423975	-0.0692302	-0.350492	-0.00521518	0.00419253	0.011143	-0.00669422	0.0103685
0.528	0.0440769	-0.054586	-0.124363	-0.0390041	-0.0698303	-0.47128	-0.00748114	0.00627746	0.0108681	-0.000704445	0.00984855
0.529	0.0457886	-0.0525477	-0.122135	-0.0357227	-0.0693148	-0.614247	-0.0100896	0.00756555	0.011316	0.0049886	0.00997356
0.53	0.047338	-0.0503295	-0.119584	-0.0326723	-0.0677939	-0.771208	-0.0125863	0.00724631	0.0123799	0.00992142	0.010755
0.531	0.0485728	-0.0480743	-0.116798	-0.0299301	-0.0654161	-0.934035	-0.0145833	0.00474703	0.0141275	0.0137875	0.0122031
0.532	0.049485	-0.0458747	-0.113939	-0.0275776	-0.0624678	-1.09586	-0.0157625	-5.88e-05	0.0165769	0.0163746	0.0141777
0.533	0.0501146	-0.0436354	-0.111131	-0.0257229	-0.059424	-1.25024	-0.0158822	-0.00691937	0.0194679	0.017527	0.0164469
0.534	0.0505471	-0.0412225	-0.108421	-0.0244586	-0.0567463	-1.39006	-0.0149172	-0.0151984	0.0223364	0.017347	0.0187433
0.535	0.0509296	-0.0386846	-0.10586	-0.0237208	-0.054671	-1.50758	-0.013089	-0.0239636	0.0247537	0.0161099	0.0206719
0.536	0.0513601	-0.0361826	-0.103506	-0.0233479	-0.0531429	-1.59577	-0.010652	-0.03231	0.0264706	0.0139449	0.0217765
0.537	0.0518487	-0.0337554	-0.101322	-0.0232391	-0.0519136	-1.64965	-0.00774356	-0.0395819	0.0273981	0.011	0.0218075
0.538	0.0524295	-0.031289	-0.0991807	-0.0233448	-0.0507651	-1.6671	-0.00454933	-0.0453366	0.0276217	0.00752005	0.0208424
0.539	0.0531205	-0.0287114	-0.0970494	-0.0235776	-0.0496822	-1.64893	-0.00136554	-0.0491956	0.0273985	0.00359242	0.0191125
0.54	0.0537936	-0.0261366	-0.0950832	-0.0237576	-0.0487728	-1.59878	0.00156299	-0.0508613	0.026997	-0.000740065	0.0168322
0.541	0.0543007	-0.0237916	-0.0934031	-0.0236261	-0.0480143	-1.52252	0.00402083	-0.0503326	0.0266011	-0.00530698	0.0141099
0.542	0.0546328	-0.0218391	-0.0918632	-0.0229869	-0.0471852	-1.42698	0.00572258	-0.048076	0.0263462	-0.00992447	0.0109486
0.543	0.054827	-0.0203542	-0.0903105	-0.0218892	-0.0461338	-1.31911	0.0064607	-0.0447871	0.0262473	-0.0144178	0.00743073
0.544	0.0549205	-0.0193005	-0.0888121	-0.0205385	-0.0449887	-1.20535	0.0063557	-0.0409225	0.0261457	-0.0186027	0.00385905
0.545	0.0550371	-0.0184327	-0.0874051	-0.019084	-0.0439644	-1.09158	0.00580929	-0.0367185	0.025971	-0.0223406	0.000639719
0.546	0.0553475	-0.0174789	-0.0859378	-0.0176636	-0.0430979	-0.983009	0.00518125	-0.0325476	0.0259246	-0.0255351	-0.00196551
0.547	0.0559461	-0.0163243	-0.0842534	-0.0164974	-0.0422523	-0.883782	0.00462949	-0.0288591	0.0261752	-0.0282188	-0.00391729
0.548	0.0567677	-0.0148695	-0.082355	-0.01578	-0.0412352	-0.79659	0.0042553	-0.0258348	0.0265968	-0.0307001	-0.00525227
0.549	0.0576102	-0.0129917	-0.080325	-0.0156119	-0.039917	-0.722672	0.00423763	-0.0234414	0.0269565	-0.033375	-0.00602
0.55	0.0583181	-0.0107594	-0.078146	-0.0159393	-0.0383404	-0.661807	0.00472742	-0.0216796	0.0271048	-0.036355	-0.0063978
0.551	0.0589063	-0.00847105	-0.0757873	-0.0165116	-0.0366957	-0.61257	0.00561816	-0.020439	0.0269684	-0.0394562	-0.00664937
0.552	0.0594404	-0.00641987	-0.0733558	-0.0170754	-0.0352162	-0.57295	0.00646463	-0.0193388	0.0265465	-0.0424816	-0.00692987
0.553	0.0599174	-0.00473319	-0.0709487	-0.0174912	-0.0341083	-0.540888	0.0067763	-0.0179984	0.0258129	-0.0454287	-0.00732623
0.554	0.060295	-0.00343917	-0.0686036	-0.0177285	-0.0334575	-0.514564	0.00640502	-0.016238	0.0246244	-0.0484528	-0.0079596
0.555	0.0605778	-0.00253726	-0.066409	-0.0178484	-0.0332183	-0.492475	0.00550557	-0.0139634	0.0229235	-0.0515374	-0.00885886
0.556	0.060837	-0.00192877	-0.0644718	-0.0178599	-0.0333203	-0.473531	0.00419325	-0.0111765	0.0209138	-0.0543097	-0.00991625
0.557	0.0610562	-0.00144713	-0.062852	-0.0177302	-0.0337295	-0.457058	0.00246414	-0.00811158	0.0189098	-0.0563462	-0.0109843
0.558	0.0610827	-0.0010384	-0.061517	-0.0174417	-0.0344654	-0.442443	0.000427164	-0.00518273	0.0171911	-0.0574514	-0.0119361
0.559	0.0608166	-0.00074367	-0.0603497	-0.0168952	-0.0355068	-0.428826	-0.00165282	-0.00277065	0.0159412	-0.0575694	-0.0127238
0.56	0.0602908	-0.000495047	-0.0592372	-0.016004	-0.0366257	-0.415119	-0.00348858	-0.00103093	0.0152454	-0.0566532	-0.0132849
0.561	0.0596735	-0.000123039	-0.0580894	-0.0148888	-0.0374246	-0.400289	-0.00488071	0.000151643	0.0152827	-0.0547276	-0.0134081
0.562	0.0592357	0.000422512	-0.0567792	-0.013836	-0.0375982	-0.383682	-0.00587617	0.0010448	0.0163035	-0.052005	-0.0129118
0.563	0.0591779	0.00103626	-0.055258	-0.0130546	-0.0370608	-0.365136	-0.00670018	0.0018536	0.0182957	-0.0487985	-0.0118236
0.564	0.059568	0.00168302	-0.0536338	-0.0125562	-0.0358012	-0.344884	-0.00746549	0.00271302	0.0209281	-0.0453552	-0.0102745
0.565	0.060402	0.00251665	-0.0519787	-0.0122981	-0.0338994	-0.323508	-0.00804506	0.00388964	0.0237811	-0.0419183	-0.00839527
0.566	0.0616247	0.00370369	-0.0503107	-0.0123199	-0.0316541	-0.301902	-0.00816133	0.00560295	0.0264988	-0.0386444	-0.00633246
0.567	0.0631259	0.00522807	-0.0487354	-0.0126781	-0.0293449	-0.28109	-0.00767471	0.00778015	0.0288654	-0.0354454	-0.00422925
0.568	0.0647081	0.00694135	-0.0474066	-0.0133346	-0.02702	-0.262028	-0.0068213	0.0102805	0.0307327	-0.032527	-0.00211266
0.569	0.0661448	0.00872521	-0.046415	-0.0141397	-0.0247577	-0.24559	-0.00602118	0.0130348	0.0318132	-0.0306228	-7.38e-05
0.57	0.0673166	0.0105249	-0.0458085	-0.0148716	-0.0227947	-0.232474	-0.00558676	0.0160262	0.0317175	-0.0302225	0.00146247
0.571	0.0682202	0.012308	-0.0456374	-0.0153279	-0.0213658	-0.222825	-0.0057189	0.0193475	0.0301923	-0.0311571	0.00208055
0.572	0.0688173	0.0140884	-0.0458702	-0.0153496	-0.0206714	-0.216191	-0.00647827	0.023089	0.0272129	-0.0329651	0.00169837
0.573	0.068971	0.0158878	-0.0464191	-0.0147812	-0.0207094	-0.211967	-0.00767314	0.0271813	0.022961	-0.0352081	0.000404853
0.574	0.0685798	0.0176404	-0.0472413	-0.0134665	-0.0211353	-0.209563	-0.00905232	0.0314083	0.0179473	-0.0374314	-0.00161092
0.575	0.0677128	0.019299	-0.0482652	-0.0112024	-0.0214822	-0.208246	-0.0105177	0.0353801	0.013006	-0.0391929	-0.00410057
0.576	0.0666165	0.0209381	-0.0492655	-0.00786549	-0.0214157	-0.207241	-0.0120378	0.0385105	0.00889979	-0.0402049	-0.00684356
0.577	0.0655523	0.0225842	-0.0499211	-0.00377469	-0.0208519	-0.206081	-0.0136125	0.0403805	0.00603932	-0.0402957	-0.00947711
0.578	0.0646574	0.0241274	-0.0500447	0.00037529	-0.0199077	-0.20481	-0.015231	0.0409972	0.00445288	-0.0394077	-0.0114148
0.579	0.0639991	0.0254098	-0.0496311	0.00399247	-0.0187959	-0.203735	-0.0167112	0.0405707	0.00396517	-0.0376921	-0.0121499
0.58	0.0636224	0.0262751	-0.0487819	0.00674244	-0.0176633	-0.203023	-0.0178261	0.0394187	0.00448274	-0.035473	-0.011554
0.581	0.0635109	0.026695	-0.0476736	0.00850778	-0.0164104	-0.202511	-0.018578	0.0379049	0.00591913	-0.0331605	-0.0099811
0.582	0.0636339	0.0268006	-0.0464536	0.00933259	-0.0148189	-0.201825	-0.0190623	0.036218	0.00798626	-0.0311533	-0.0082306
0.583	0.0640106	0.0267311	-0.0452177	0.00921136	-0.0128037	-0.200631	-0.0192219	0.0344471	0.0102317	-0.0296873	-0.00722448
0.584	0.0646528	0.0265968	-0.0440624	0.0081312	-0.0104897	-0.198683	-0.0189592	0.0327325	0.0121579	-0.028794	-0.00754976
0.585	0.065538	0.0264242	-0.0430404	0.00632447	-0.00817022	-0.195729	-0.0182706	0.031074	0.0133911	-0.0284776	-0.00929857
0.586	0.0666344	0.0261218	-0.0421815	0.00418755	-0.00625525	-0.191629	-0.0172202	0.029255	0.0139121	-0.0288068	-0.0124463
0.587	0.0678267	0.0256472	-0.0415994	0.00203648	-0.00516323	-0.186574	-0.0159262	0.0271466	0.0138976	-0.029764	-0.0171981
0.588	0.0688212	0.0250967	-0.0414747	8.75e-05	-0.00506814	-0.181085	-0.0145772	0.0247716	0.0134073	-0.0312772	-0.0236361
0.589	0.0692767	0.0246593	-0.0418705	-0.00149315	-0.00583436	-0.175571	-0.0134673	0.022178	0.0125891	-0.0333312	-0.0313423
0.59	0.0691183	0.0245373	-0.0425418	-0.00263742	-0.00722633	-0.169881	-0.0129569	0.0194808	0.0118911	-0.0357603	-0.0394309
0.591	0.0685917	0.0248874	-0.0431208	-0.00333768	-0.00901687	-0.163466	-0.013335	0.0167955	0.0118031	-0.0381776	-0.046826
0.592	0.0680004	0.025747	-0.0434995	-0.00356334	-0.0109714	-0.155822	-0.0147043	0.0142333	0.0125753	-0.040197	-0.0527072
0.593	0.0674765	0.0269994	-0.0438158	-0.00326458	-0.012905	-0.146699	-0.0169246	0.0119809	0.0142737	-0.0415427	-0.0566432
0.594	0.0669791	0.028482	-0.0441222	-0.00240017	-0.0147218	-0.136083	-0.0196886	0.010174	0.0169612	-0.0421087	-0.0584459
0.595	0.0664573	0.0300025	-0.0442191	-0.00101864	-0.0163072	-0.12409	-0.0226807	0.00875235	0.020708	-0.0419605	-0.0579732
0.596	0.0659696	0.0313293	-0.0438529	0.000719229	-0.0175246	-0.110944	-0.0255664	0.00745059	0.0254549	-0.0411807	-0.0550056
0.597	0.0656387	0.0323495	-0.0428931	0.00263587	-0.018297	-0.0970907	-0.0279637	0.00598285	0.0308554	-0.0398317	-0.0495027
0.598	0.0654797	0.0331573	-0.0411878	0.00456827	-0.0185256	-0.0832299	-0.0296649	0.00419067	0.0362828	-0.0380176	-0.0419791
0.599	0.0653849	0.0338975	-0.0384973	0.00634584	-0.0181042	-0.0700383	-0.0307284	0.00187934	0.0410489	-0.0358324	-0.0333987
0.6	0.0653128	0.0346207	-0.0347341	0.00780209	-0.0171732	-0.0578703	-0.0312538	-0.00116749	0.0446667	-0.0334117	-0.0247601
0.601	0.0653545	0.0353837	-0.0300946	0.00879153	-0.0161708	-0.0468775	-0.0313103	-0.00493206	0.0469922	-0.0310375	-0.0169982
0.602	0.065649	0.0363045	-0.0250788	0.00923242	-0.0155441	-0.0372592	-0.0310445	-0.00918767	0.0481243	-0.0290526	-0.0110306
0.603	0.0662555	0.0374141	-0.0204631	0.00918928	-0.0155243	-0.0293512	-0.0306467	-0.0136377	0.0481728	-0.0278287	-0.00768114
0.604	0.067042	0.0385563	-0.0169612	0.00882178	-0.0160312	-0.0235213	-0.030227	-0.0179545	0.0470938	-0.027674	-0.00740114
0.605	0.0677852	0.0395429	-0.0149501	0.00822281	-0.0166958	-0.019931	-0.0298195	-0.0217595	0.0447417	-0.0285932	-0.00987937
0.606	0.0683696	0.0403903	-0.0145354	0.00740195	-0.0171188	-0.0184217	-0.0294095	-0.0246625	0.0410991	-0.0302976	-0.0142035
0.607	0.0686899	0.0412429	-0.0156083	0.00635788	-0.0170738	-0.0186118	-0.0288885	-0.0264398	0.0362674	-0.0323846	-0.0193432
0.608	0.0685337	0.0421127	-0.0178447	0.00514416	-0.0165411	-0.0200206	-0.0282071	-0.027046	0.0303183	-0.0344736	-0.0243884
0.609	0.0677819	0.0428359	-0.0208489	0.00390309	-0.0157067	-0.0221066	-0.0274836	-0.0264716	0.0234748	-0.0363134	-0.0287248
0.61	0.0665797	0.0432213	-0.0242629	0.0028056	-0.0148366	-0.0243388	-0.0268109	-0.0248138	0.0161942	-0.0377503	-0.0320758
0.611	0.0652811	0.0431779	-0.0277215	0.00193028	-0.0141747	-0.0263115	-0.0261399	-0.022427	0.0088993	-0.0386384	-0.0342424
0.612	0.0642802	0.0427752	-0.0308957	0.0011542	-0.013938	-0.0277278	-0.0253639	-0.0198342	0.00193452	-0.0388688	-0.034892
0.613	0.0637919	0.0422556	-0.0336237	0.000206147	-0.0142195	-0.0284055	-0.0244768	-0.0174828	-0.00439989	-0.0384075	-0.0337862
0.614	0.0637507	0.041883	-0.0358898	-0.00114966	-0.0149221	-0.028435	-0.023592	-0.0156034	-0.00995983	-0.0372334	-0.0310417
0.615	0.0639593	0.0416905	-0.0376438	-0.00294489	-0.0158511	-0.0281392	-0.0228049	-0.0143059	-0.014729	-0.0353368	-0.0269906
0.616	0.0642964	0.0415617	-0.0387803	-0.00502906	-0.0168545	-0.0278737	-0.0221603	-0.0138811	-0.0187391	-0.0328723	-0.0220721
0.617	0.0647754	0.0414879	-0.0393554	-0.00725331	-0.017877	-0.0279072	-0.0216923	-0.0148079	-0.022009	-0.0301814	-0.0168654
0.618	0.0653993	0.0414884	-0.0396276	-0.00951228	-0.0189039	-0.0283527	-0.0215431	-0.0172261	-0.0245578	-0.0276125	-0.0119711
0.619	0.0660397	0.041449	-0.0398167	-0.0116781	-0.0199358	-0.0293411	-0.0219737	-0.0207203	-0.0265519	-0.025516	-0.00793883
0.62	0.0665188	0.041149	-0.0399508	-0.0135343	-0.0209709	-0.0311745	-0.023083	-0.0247031	-0.0282895	-0.0243697	-0.00523787
0.621	0.0666898	0.0403877	-0.0400341	-0.0147687	-0.0219577	-0.0335582	-0.0247474	-0.0285821	-0.029953	-0.0245553	-0.00416344
0.622	0.0664349	0.0392376	-0.0401957	-0.0151522	-0.022812	-0.0352681	-0.0268208	-0.0316114	-0.031559	-0.0260808	-0.00475953
0.623	0.0657101	0.0380343	-0.0404789	-0.0147796	-0.0234426	-0.035874	-0.0293624	-0.0329366	-0.0330428	-0.0286977	-0.006685
0.624	0.0646462	0.0370026	-0.040751	-0.0139743	-0.023861	-0.0364151	-0.0327024	-0.031951	-0.0341672	-0.032055	-0.00930929
0.625	0.0634939	0.0361668	-0.0408994	-0.0129299	-0.024214	-0.0378137	-0.0369017	-0.0287551	-0.0345997	-0.0358471	-0.0121049
0.626	0.062451	0.035529	-0.0408518	-0.0116952	-0.0246171	-0.0400836	-0.0413328	-0.0241248	-0.0341947	-0.039898	-0.0147809
0.627	0.061636	0.0350603	-0.0405454	-0.0103984	-0.0251232	-0.0427669	-0.0450773	-0.0189143	-0.03306	-0.0439224	-0.0170515
0.628	0.0610999	0.0346259	-0.0399926	-0.00924209	-0.0257385	-0.0455204	-0.0474824	-0.0136623	-0.0313146	-0.0474943	-0.0185377
0.629	0.0608264	0.0340971	-0.0392829	-0.00833467	-0.0263819	-0.0482839	-0.0483737	-0.00873142	-0.0288753	-0.0502504	-0.0189654
0.63	0.0608479	0.0334412	-0.0385311	-0.00766215	-0.0268623	-0.0510117	-0.0479192	-0.00452205	-0.0256005	-0.0519664	-0.0183212
0.631	0.0612152	0.0326328	-0.0377769	-0.00723056	-0.0268526	-0.0535619	-0.0463817	-0.00133257	-0.0215368	-0.0525823	-0.016872
0.632	0.0618042	0.03162	-0.0369746	-0.0071019	-0.0260974	-0.0557868	-0.0440054	0.000800888	-0.0169651	-0.0521267	-0.0150939
0.633	0.0623576	0.0304299	-0.0361137	-0.00740788	-0.0247153	-0.0576299	-0.041029	0.00191873	-0.012357	-0.0507253	-0.0134182
0.634	0.062664	0.0292171	-0.0351795	-0.00833384	-0.0231556	-0.0590732	-0.037774	0.00205377	-0.0082449	-0.0486346	-0.0120696
0.635	0.062641	0.0281614	-0.0340224	-0.00987704	-0.0218096	-0.0601057	-0.0346534	0.00143771	-0.00497394	-0.0461988	-0.0111957
0.636	0.0623928	0.0273249	-0.0325716	-0.0117398	-0.0207072	-0.0608303	-0.032056	0.000612141	-0.00260151	-0.0439257	-0.0109088
0.637	0.0621477	0.026653	-0.0310434	-0.0135151	-0.019687	-0.0614263	-0.0301965	0.000455351	-0.00108099	-0.0423341	-0.0112922
0.638	0.0620841	0.0260804	-0.0297651	-0.0149125	-0.0187165	-0.0619741	-0.0290444	0.00182813	-0.000392901	-0.0416154	-0.0123979
0.639	0.0622371	0.0255207	-0.0289953	-0.0158479	-0.017927	-0.0623367	-0.0284593	0.00475479	-0.000508177	-0.0415675	-0.0140605
0.64	0.0625334	0.0248024	-0.0287952	-0.0163651	-0.0175594	-0.0623285	-0.0283702	0.00841344	-0.00131515	-0.0418348	-0.0159788
0.641	0.0629559	0.0238243	-0.0289552	-0.0165206	-0.017871	-0.0619787	-0.0287594	0.0119063	-0.00250585	-0.0421793	-0.0179319
0.642	0.0634982	0.0227344	-0.0291344	-0.0163306	-0.0188998	-0.0613714	-0.0295846	0.0146751	-0.00362662	-0.0424117	-0.0197709
0.643	0.0639326	0.0217956	-0.0290819	-0.0158067	-0.0203387	-0.0604823	-0.0307897	0.0165039	-0.00430138	-0.0422824	-0.0213891
0.644	0.0639428	0.0212121	-0.0287667	-0.0149864	-0.0216514	-0.0593791	-0.0322509	0.0173291	-0.00435603	-0.041507	-0.0226927
0.645	0.0634842	0.0210839	-0.028289	-0.0139339	-0.0224025	-0.0582186	-0.0337233	0.0171295	-0.00374336	-0.0399213	-0.0236216
0.646	0.0628799	0.0213838	-0.0277314	-0.0127204	-0.0225441	-0.057001	-0.0349779	0.0159001	-0.0024353	-0.0379826	-0.0241803
0.647	0.0625128	0.0220066	-0.0271615	-0.0113711	-0.022211	-0.0556254	-0.0359119	0.0136357	-0.000489308	-0.0365659	-0.0244303
0.648	0.0624634	0.0228571	-0.0266116	-0.00994151	-0.0214356	-0.0540804	-0.036529	0.0104552	0.0021877	-0.0361139	-0.0244732
0.649	0.0625409	0.0238414	-0.0259983	-0.00860847	-0.0202797	-0.052426	-0.0369369	0.00663779	0.00628215	-0.0365691	-0.0243791
0.65	0.0625104	0.0247728	-0.0252002	-0.0075874	-0.0187731	-0.0508358	-0.0372082	0.00246934	0.0123828	-0.0376868	-0.0242281
0.651	0.0622143	0.0254599	-0.0241704	-0.00695977	-0.016685	-0.0496187	-0.0372717	-0.00189065	0.0198483	-0.039122	-0.0241181
0.652	0.0616223	0.0258954	-0.0229169	-0.00657906	-0.0140085	-0.0490424	-0.0371678	-0.00631166	0.0271053	-0.0405153	-0.0240726
0.653	0.0608016	0.0261953	-0.0215177	-0.00628007	-0.0114462	-0.0493427	-0.0370943	-0.0105581	0.0325673	-0.0416045	-0.0241701
0.654	0.059797	0.0264104	-0.0201442	-0.0060927	-0.00984424	-0.0507634	-0.0371172	-0.014271	0.0351177	-0.0422216	-0.0246378
0.655	0.0586437	0.0265041	-0.0189712	-0.00606273	-0.00954937	-0.0532356	-0.0371582	-0.0170199	0.0344294	-0.0422046	-0.0256317
0.656	0.0575733	0.0264599	-0.0181363	-0.00604264	-0.010503	-0.0562799	-0.0371393	-0.0185422	0.0309175	-0.0414609	-0.0270374
0.657	0.0569478	0.0263	-0.0177713	-0.0057906	-0.0124354	-0.0594529	-0.0370495	-0.0187657	0.0253681	-0.0400528	-0.0285437
0.658	0.0568849	0.0260847	-0.0179433	-0.00511539	-0.0149157	-0.0624794	-0.0369943	-0.0176297	0.0186324	-0.0380691	-0.029892
0.659	0.0571993	0.0259326	-0.0185744	-0.00391777	-0.0174245	-0.064978	-0.0371077	-0.0152709	0.0114943	-0.0355772	-0.0309939
0.66	0.0576714	0.0259203	-0.0195175	-0.00224316	-0.0194239	-0.0664894	-0.0373802	-0.0121218	0.00464581	-0.0327912	-0.0318396
0.661	0.0581967	0.0260551	-0.0206301	-0.000281586	-0.0205063	-0.0667086	-0.0377385	-0.00859229	-0.00135487	-0.030036	-0.0323612
0.662	0.0587627	0.0263475	-0.0217251	0.00167828	-0.0204903	-0.0655796	-0.0382564	-0.00494471	-0.00609729	-0.0275924	-0.0322921
0.663	0.0593444	0.0267936	-0.0226172	0.00334164	-0.0193688	-0.0632582	-0.0390508	-0.00145248	-0.00937472	-0.0257463	-0.0311951
0.664	0.0598315	0.0274746	-0.0232033	0.00456782	-0.0172393	-0.0600163	-0.0401019	0.00159399	-0.0112909	-0.0247707	-0.0287208
0.665	0.060141	0.0286412	-0.0234451	0.00537523	-0.0142798	-0.0561902	-0.041311	0.00400009	-0.012247	-0.0248012	-0.02486
0.666	0.0603046	0.0303931	-0.0233706	0.00584093	-0.0108466	-0.0522371	-0.042554	0.00558574	-0.0126706	-0.0258216	-0.0200429
0.667	0.0603808	0.0324832	-0.023013	0.00606703	-0.00751663	-0.0486568	-0.0437499	0.00604096	-0.0126815	-0.027692	-0.015016
0.668	0.0603444	0.0345934	-0.0223516	0.00613122	-0.00485941	-0.0457183	-0.0449598	0.00516541	-0.0122436	-0.0302243	-0.0105427
0.669	0.0600576	0.0365695	-0.0213652	0.00605457	-0.00318952	-0.0434839	-0.0462859	0.00323679	-0.0115228	-0.0332961	-0.0071914
0.67	0.059421	0.0384123	-0.0200723	0.0058432	-0.00254306	-0.0421279	-0.0477658	0.000862742	-0.0108987	-0.0367832	-0.00534587
0.671	0.0585509	0.0401456	-0.0185577	0.00552343	-0.00279043	-0.0419036	-0.0493533	-0.00147403	-0.0108293	-0.040335	-0.00527547
0.672	0.0576898	0.0417603	-0.0169536	0.00515344	-0.00372168	-0.0428243	-0.050788	-0.00351185	-0.0115701	-0.0432972	-0.00704459
0.673	0.0570152	0.0432522	-0.0153872	0.00487553	-0.00513716	-0.044677	-0.051686	-0.00505653	-0.0128869	-0.044945	-0.0103616
0.674	0.0565824	0.0445198	-0.0139904	0.00492559	-0.00693227	-0.047191	-0.0518908	-0.00597634	-0.0142222	-0.0448026	-0.0147119
0.675	0.0563392	0.0453808	-0.0128799	0.00547239	-0.00897329	-0.0500378	-0.0515261	-0.00626407	-0.0151313	-0.0427434	-0.0195854
0.676	0.0562713	0.0457545	-0.0120497	0.00647069	-0.0109942	-0.052917	-0.0508389	-0.00603506	-0.015569	-0.0389507	-0.0244604
0.677	0.0564927	0.0456403	-0.0113671	0.00772751	-0.0127354	-0.0556714	-0.0501713	-0.00548838	-0.0158047	-0.0338142	-0.0288836
0.678	0.0570092	0.0451136	-0.010813	0.00905771	-0.014045	-0.058226	-0.0498771	-0.00493316	-0.0159962	-0.0278376	-0.03262
0.679	0.0576354	0.0443931	-0.0105535	0.0103442	-0.0148407	-0.060475	-0.0501047	-0.00471773	-0.0159076	-0.0216592	-0.0355396
0.68	0.0582026	0.043734	-0.0105992	0.011486	-0.0150294	-0.0623107	-0.0507649	-0.00503092	-0.0151579	-0.0159401	-0.0375157
0.681	0.0586233	0.0433014	-0.0106585	0.0123374	-0.0145213	-0.0636964	-0.0516779	-0.00590209	-0.0136583	-0.0111694	-0.0384886
0.682	0.0589386	0.0431328	-0.0104699	0.0126928	-0.0134738	-0.0645414	-0.0525301	-0.0073585	-0.011778	-0.00770817	-0.0384616
0.683	0.0593212	0.0431724	-0.0100427	0.0124162	-0.0124738	-0.0646548	-0.0527739	-0.0094534	-0.0101331	-0.00589236	-0.0375054
0.684	0.0598744	0.0433061	-0.00950514	0.0116305	-0.0121088	-0.0639502	-0.0518916	-0.0121063	-0.00918728	-0.0059794	-0.0358383
0.685	0.0605548	0.0433946	-0.00893069	0.0105986	-0.0123189	-0.0625337	-0.0497762	-0.0150491	-0.00905944	-0.00808407	-0.0336629
0.686	0.0612214	0.0433531	-0.00836563	0.00950998	-0.012473	-0.0606203	-0.0467154	-0.0179985	-0.00965756	-0.0121387	-0.0310028
0.687	0.0616563	0.0431844	-0.00787965	0.00850961	-0.0119918	-0.0585354	-0.0431011	-0.020827	-0.0109465	-0.0179276	-0.0279683
0.688	0.0616947	0.0429592	-0.00754367	0.00771907	-0.0107821	-0.0567487	-0.039245	-0.0235464	-0.0129434	-0.0251083	-0.0250118
0.689	0.0613086	0.0428017	-0.00738299	0.00721525	-0.00916788	-0.0556149	-0.0354534	-0.0260448	-0.0154268	-0.033152	-0.0227166
0.69	0.0605422	0.0428206	-0.00735057	0.00712656	-0.00753163	-0.0550431	-0.0321456	-0.0279463	-0.017964	-0.0414375	-0.0213829
0.691	0.0595099	0.0429644	-0.00734574	0.00759664	-0.00622486	-0.0546269	-0.0295416	-0.028888	-0.0202291	-0.0493615	-0.0207984
0.692	0.0583474	0.0429864	-0.00726706	0.00854186	-0.00561616	-0.0540062	-0.0272659	-0.0287954	-0.0220954	-0.0563795	-0.0203457
0.693	0.05709	0.0427083	-0.00705384	0.00963978	-0.0058549	-0.0529903	-0.0246253	-0.0278701	-0.0234508	-0.0620431	-0.0194341
0.694	0.0557578	0.0422335	-0.00675596	0.0106395	-0.00677895	-0.0515586	-0.0211876	-0.0264195	-0.0241365	-0.0659507	-0.0177733
0.695	0.0544838	0.0417618	-0.00658812	0.0114937	-0.00808855	-0.0498704	-0.0169989	-0.024745	-0.0242235	-0.0678833	-0.0152744
0.696	0.0534379	0.0414431	-0.00676537	0.0121917	-0.00932402	-0.0481323	-0.0124111	-0.0231902	-0.0239464	-0.0680236	-0.012076
0.697	0.0527115	0.0413292	-0.00732566	0.0127216	-0.00991201	-0.0464125	-0.00785649	-0.0221093	-0.0233786	-0.0668729	-0.00871906
0.698	0.0522752	0.0413008	-0.0081618	0.0131134	-0.00956938	-0.0446926	-0.00383989	-0.0217111	-0.0228144	-0.0649691	-0.00597852
0.699	0.0520401	0.0412874	-0.00899034	0.0133813	-0.00856318	-0.04308	-0.000860886	-0.0220201	-0.0229216	-0.0626295	-0.00442059
0.7	0.0519668	0.0413788	-0.00936168	0.013455	-0.00740303	-0.0418359	0.000867038	-0.0229432	-0.0239771	-0.0600546	-0.00426019
0.701	0.0520363	0.0416694	-0.00896777	0.0131995	-0.00633758	-0.0411816	0.00147701	-0.0242492	-0.0256402	-0.0576309	-0.00550825
0.702	0.0522178	0.0422424	-0.00784929	0.0126376	-0.00528586	-0.0412151	0.00114319	-0.0256629	-0.0275092	-0.0558509	-0.00801086
0.703	0.0525788	0.0431016	-0.00630656	0.0119578	-0.00419777	-0.0419798	-0.000146802	-0.0271605	-0.0293696	-0.054946	-0.0115144
0.704	0.0532777	0.0440725	-0.00475849	0.0112217	-0.00325402	-0.0433824	-0.00244012	-0.0289012	-0.0310247	-0.0547686	-0.0158006
0.705	0.0544407	0.0448991	-0.0034904	0.0102985	-0.00275255	-0.0450409	-0.00566574	-0.0308633	-0.0322002	-0.0550763	-0.0206409
0.706	0.0561152	0.0454013	-0.00249811	0.00902857	-0.00298483	-0.0464758	-0.00965189	-0.0327494	-0.0326475	-0.0557265	-0.0256787
0.707	0.0581451	0.0455446	-0.00169875	0.00747339	-0.00406809	-0.0474289	-0.0140901	-0.0342092	-0.0322738	-0.0565564	-0.030459
0.708	0.0601085	0.0454114	-0.00108505	0.00604289	-0.00576615	-0.0478094	-0.018608	-0.0351276	-0.0311457	-0.0573471	-0.0346192
0.709	0.0616005	0.0451448	-0.000690365	0.00515246	-0.007532	-0.0476003	-0.0229586	-0.0357022	-0.0293302	-0.0579472	-0.0380275
0.71	0.0624973	0.0448377	-0.000571132	0.00485652	-0.008851	-0.0469251	-0.0270501	-0.0362628	-0.026817	-0.0582544	-0.0406655
0.711	0.06287	0.0445227	-0.00078948	0.00501844	-0.00956758	-0.045876	-0.0308589	-0.0370109	-0.0236494	-0.0581729	-0.0424332
0.712	0.0627963	0.0442587	-0.00143128	0.00556283	-0.00980754	-0.044422	-0.0342813	-0.0379262	-0.0199161	-0.0576803	-0.0432024
0.713	0.0623351	0.0440799	-0.00255887	0.00638169	-0.00978513	-0.0427308	-0.0370542	-0.0390019	-0.0156648	-0.0568756	-0.0429809
0.714	0.0615918	0.0439824	-0.0041101	0.00724713	-0.00969083	-0.0412507	-0.0389169	-0.0403838	-0.0110005	-0.0560053	-0.0419154
0.715	0.060674	0.043915	-0.00587392	0.00801524	-0.00957879	-0.0403776	-0.0397065	-0.042124	-0.00613193	-0.0552959	-0.0403146
0.716	0.0596173	0.0437701	-0.0075134	0.00865275	-0.00947545	-0.0403047	-0.0392636	-0.0441098	-0.00126614	-0.0547964	-0.0386699
0.717	0.0585134	0.0435083	-0.00880957	0.00905987	-0.00949576	-0.04104	-0.0375173	-0.0461876	0.00346279	-0.0545048	-0.0374345
0.718	0.0576129	0.0431634	-0.00986151	0.00923835	-0.00970222	-0.0424393	-0.0346754	-0.0481261	0.00788128	-0.0544175	-0.0367344
0.719	0.0571349	0.0427838	-0.0108486	0.00934502	-0.0100502	-0.0443743	-0.0311877	-0.0496657	0.0116591	-0.0545328	-0.036396
0.72	0.0570799	0.042394	-0.0118005	0.00946315	-0.0104408	-0.0467999	-0.0275464	-0.050627	0.0143795	-0.0549047	-0.0362863
0.721	0.0572522	0.0419767	-0.0126529	0.00961431	-0.0107661	-0.0496435	-0.0242145	-0.0508595	0.0156525	-0.0555188	-0.0364389
0.722	0.0574134	0.0415399	-0.0133504	0.00981309	-0.0110325	-0.052711	-0.0216288	-0.0501841	0.0152925	-0.0562171	-0.0368402
0.723	0.057486	0.0411043	-0.0139125	0.0100267	-0.0113007	-0.0556207	-0.0200848	-0.0484476	0.0134771	-0.0568364	-0.0373776
0.724	0.0575165	0.0407054	-0.0144399	0.0102344	-0.0115041	-0.0579607	-0.0196532	-0.0456783	0.0106017	-0.0572861	-0.0380228
0.725	0.0575569	0.0403372	-0.0150043	0.0104802	-0.0115303	-0.0596232	-0.0201101	-0.0422752	0.00696833	-0.0574675	-0.038857
0.726	0.0577249	0.0398198	-0.0156259	0.01081	-0.0113831	-0.0607215	-0.0208772	-0.0388663	0.00271348	-0.0572681	-0.0399525
0.727	0.0580915	0.038975	-0.0163854	0.0112403	-0.0111579	-0.0612412	-0.0213142	-0.0358766	-0.0020222	-0.0565951	-0.0412094
0.728	0.0585816	0.0377979	-0.0173157	0.0117858	-0.0109434	-0.0610003	-0.021218	-0.0334747	-0.00700035	-0.0553678	-0.0422211
0.729	0.0591237	0.0364019	-0.0181828	0.0124779	-0.0107755	-0.0598775	-0.0208649	-0.0318082	-0.0118537	-0.0536724	-0.0424963
0.73	0.0596638	0.0350018	-0.0186401	0.0133308	-0.0106007	-0.0579898	-0.020618	-0.0309725	-0.0161694	-0.0517606	-0.0418298
0.731	0.0600871	0.0337927	-0.0185848	0.0142699	-0.0103034	-0.0556609	-0.0207362	-0.0308522	-0.0197924	-0.0497362	-0.0402696
0.732	0.0603125	0.0327738	-0.0181655	0.0150633	-0.00984522	-0.0533132	-0.0213454	-0.0311331	-0.0227824	-0.0476024	-0.0379274
0.733	0.0603959	0.0318539	-0.017509	0.0153749	-0.00934906	-0.0512836	-0.022237	-0.031477	-0.0250914	-0.045554	-0.0350412
0.734	0.0603881	0.0310923	-0.0166044	0.0150428	-0.00896328	-0.0496375	-0.0228497	-0.0316614	-0.0267025	-0.0439008	-0.0320143
0.735	0.0602212	0.0306459	-0.0154634	0.0141898	-0.00868336	-0.0483039	-0.0228308	-0.0315816	-0.0278663	-0.0428848	-0.0293423
0.736	0.0598551	0.0305589	-0.0142317	0.0130932	-0.00848068	-0.0473371	-0.0224805	-0.0312784	-0.0289897	-0.0426795	-0.0274511
0.737	0.059348	0.0308303	-0.0130536	0.0120546	-0.00844504	-0.0469495	-0.0223327	-0.0309362	-0.0304753	-0.0433578	-0.0264279
0.738	0.0587876	0.0315085	-0.0120222	0.0112658	-0.00865054	-0.0472441	-0.0225885	-0.0307031	-0.0325499	-0.0447532	-0.0260267
0.739	0.0582258	0.0325782	-0.0112391	0.0107873	-0.00913256	-0.0479627	-0.023265	-0.0305822	-0.0350887	-0.0464786	-0.0260458
0.74	0.0576556	0.0339906	-0.0107764	0.0105875	-0.00987626	-0.0486837	-0.0245241	-0.0304966	-0.0377192	-0.0481842	-0.0266382
0.741	0.0570247	0.0356629	-0.0107064	0.0105908	-0.0106477	-0.0490809	-0.0264846	-0.0303099	-0.0401107	-0.0497579	-0.0280897
0.742	0.0562027	0.0373223	-0.0111787	0.0107922	-0.0110755	-0.0488931	-0.028933	-0.0297905	-0.0420236	-0.0511952	-0.0303733
0.743	0.0550615	0.0386317	-0.012248	0.011228	-0.0109394	-0.048002	-0.0314191	-0.0287282	-0.0431324	-0.0523753	-0.0330476
0.744	0.053717	0.0394913	-0.0136423	0.011824	-0.0102717	-0.0464969	-0.0335225	-0.0271676	-0.0429519	-0.053197	-0.0353862
0.745	0.0525405	0.0400255	-0.014901	0.0124388	-0.00926134	-0.0444655	-0.0350222	-0.025384	-0.0408773	-0.0537796	-0.0366726
0.746	0.0518523	0.0403134	-0.0156423	0.0129841	-0.00811192	-0.0419691	-0.0359102	-0.0236465	-0.0364474	-0.0542868	-0.0366005
0.747	0.0516954	0.040346	-0.0156715	0.013454	-0.00687369	-0.0392643	-0.0362882	-0.0221438	-0.0299329	-0.0546819	-0.0353728
0.748	0.0518218	0.0401781	-0.0150171	0.0139001	-0.00544796	-0.0367999	-0.0362225	-0.0209904	-0.0224268	-0.0548518	-0.0334256
0.749	0.0518182	0.0399547	-0.0138313	0.0143424	-0.00386268	-0.0349576	-0.0357578	-0.0202749	-0.0151321	-0.0548552	-0.0311626
0.75	0.0514566	0.0398542	-0.0122682	0.0148487	-0.00233498	-0.0338477	-0.0349567	-0.020109	-0.00892187	-0.0547897	-0.0288567
0.751	0.0510046	0.0400126	-0.0105154	0.0156743	-0.000993283	-0.0334189	-0.033791	-0.0204267	-0.00440622	-0.0545669	-0.0266349
0.752	0.0509853	0.0404491	-0.00878327	0.0171293	0.000165574	-0.0336397	-0.0322552	-0.0208913	-0.00197798	-0.0540922	-0.0245863
0.753	0.051575	0.0410154	-0.00723952	0.019408	0.00104137	-0.0344153	-0.0305206	-0.0211675	-0.00186109	-0.0535078	-0.0228492
0.754	0.0524874	0.0414654	-0.00604291	0.0224976	0.00141402	-0.0355656	-0.0287971	-0.0211033	-0.00404307	-0.0530656	-0.0215913
0.755	0.0533725	0.0416882	-0.00531421	0.0261256	0.0011776	-0.0371355	-0.027183	-0.020178	-0.00799069	-0.0529128	-0.0209549
0.756	0.0540236	0.0417461	-0.00502722	0.0299018	0.000488866	-0.0396687	-0.0256833	-0.0171035	-0.0126919	-0.0530848	-0.0209618
0.757	0.0543878	0.0417192	-0.00504126	0.0334443	-0.000325681	-0.0436907	-0.0243901	-0.0112159	-0.0172353	-0.053512	-0.0214292
0.758	0.0545151	0.041758	-0.00525534	0.0363778	-0.000978946	-0.0487809	-0.0235686	-0.00358974	-0.0212105	-0.0540062	-0.0221135
0.759	0.0543874	0.0421101	-0.0057278	0.0383723	-0.00130261	-0.0536596	-0.0235149	0.00392462	-0.0244574	-0.0543248	-0.0230466
0.76	0.0539991	0.0428902	-0.00659896	0.0391926	-0.0011665	-0.0571148	-0.0244873	0.00984372	-0.026781	-0.0542995	-0.0243305
0.761	0.0535315	0.0439393	-0.0078954	0.038823	-0.000429883	-0.0585541	-0.026562	0.0134487	-0.0280852	-0.0539507	-0.0256619
0.762	0.0531323	0.044961	-0.00945157	0.037524	0.00100595	-0.0580225	-0.0294168	0.0146665	-0.0283964	-0.0534221	-0.0264618
0.763	0.05281	0.0457629	-0.0109864	0.0355858	0.00309919	-0.0559735	-0.0325391	0.0137373	-0.0277374	-0.0528745	-0.0262539
0.764	0.0525809	0.0463162	-0.0122772	0.0331462	0.00557602	-0.0528855	-0.0355218	0.0110626	-0.0262698	-0.052372	-0.0249436
0.765	0.0524022	0.0466708	-0.0132451	0.030292	0.00798958	-0.0491066	-0.038061	0.00706869	-0.0243964	-0.051777	-0.022896
0.766	0.0521708	0.0468828	-0.0138804	0.027147	0.00994763	-0.0449918	-0.0399148	0.0021271	-0.0225513	-0.0509722	-0.0207107
0.767	0.0518629	0.0469003	-0.0142045	0.0238525	0.0112169	-0.040911	-0.040893	-0.00332579	-0.0210303	-0.0500827	-0.0189642
0.768	0.0515128	0.0466144	-0.0143037	0.0205356	0.0116442	-0.0371255	-0.0408975	-0.00883294	-0.0200638	-0.0492735	-0.0180333
0.769	0.0512153	0.0460481	-0.014322	0.0173884	0.0111743	-0.0337704	-0.040011	-0.0141564	-0.0198953	-0.0485368	-0.0180114
0.77	0.051161	0.0453383	-0.0144316	0.0149029	0.0100019	-0.0310003	-0.0385178	-0.0192077	-0.0207614	-0.0477873	-0.0188155
0.771	0.0514455	0.0446157	-0.0147646	0.0138038	0.00852955	-0.0290783	-0.0368111	-0.0237741	-0.0227242	-0.0469359	-0.0203191
0.772	0.0519531	0.0440054	-0.0153164	0.0145925	0.00703878	-0.028145	-0.0351979	-0.0275028	-0.025476	-0.045832	-0.0223296
0.773	0.0525361	0.0436947	-0.015976	0.0172666	0.0055613	-0.028012	-0.0338223	-0.0300516	-0.0284574	-0.044315	-0.0245853
0.774	0.0531548	0.0438277	-0.0166212	0.0214422	0.0041169	-0.0283822	-0.032779	-0.0312015	-0.0310901	-0.0422903	-0.0267766
0.775	0.053795	0.0444107	-0.0171259	0.0266233	0.00288547	-0.0291131	-0.0321644	-0.0309687	-0.0329228	-0.0397309	-0.0285416
0.776	0.0543094	0.0454358	-0.0173639	0.0322533	0.00210285	-0.0301559	-0.0319605	-0.0296531	-0.0338105	-0.0366356	-0.0296378
0.777	0.0544918	0.0468041	-0.0173354	0.0377749	0.00183742	-0.0313814	-0.0319112	-0.0277457	-0.033912	-0.033	-0.0300342
0.778	0.0543137	0.0482229	-0.0172025	0.0428557	0.00192907	-0.0326087	-0.0316797	-0.0257612	-0.0334633	-0.0289976	-0.0298179
0.779	0.0539565	0.0494964	-0.0170723	0.0473528	0.00219805	-0.0337756	-0.0311722	-0.0240519	-0.0325603	-0.0250842	-0.0291855
0.78	0.0536562	0.0507396	-0.0169345	0.0665609	0.00268475	-0.0349409	-0.0305538	-0.0228188	-0.0311662	-0.0217178	-0.0283716
0.781	0.0535527	0.0521329	-0.0167397	0.141073	0.00353613	-0.0360574	-0.0300414	-0.0222811	-0.02936	-0.0192091	-0.02757
0.782	0.0536628	0.0536606	-0.0163408	0.291921	0.00467662	-0.0369293	-0.02977	-0.0226365	-0.0274509	-0.0177917	-0.0269158
0.783	0.0539198	0.0552277	-0.0155635	0.486366	0.00591563	-0.0374061	-0.0296894	-0.0239169	-0.0258537	-0.0175013	-0.0264279
0.784	0.0541999	0.05679	-0.0143435	0.672196	0.00727593	-0.0374609	-0.029594	-0.0260183	-0.0248801	-0.0181194	-0.0261165
0.785	0.0544127	0.058255	-0.0127492	0.8123	0.0088288	-0.0372017	-0.0293378	-0.0287073	-0.0246527	-0.0168012	-0.0261144
0.786	0.0545401	0.0595123	-0.0109452	0.888644	0.0103324	-0.0368078	-0.0289189	-0.0315301	-0.0252118	-0.00698192	-0.0266388
0.787	0.054581	0.0605386	-0.00916273	0.898398	0.0113085	-0.0363801	-0.0283236	-0.03394	-0.0265446	0.013864	-0.0278369
0.788	0.054553	0.0613255	-0.00775923	0.849066	0.0114737	-0.035872	-0.027464	-0.0355796	-0.0284983	0.039683	-0.0296496
0.789	0.0544789	0.0618749	-0.0070908	0.754044	0.0109415	-0.0352483	-0.026286	-0.0363245	-0.0307626	0.0625443	-0.0318323
0.79	0.0543163	0.0623253	-0.00721167	0.629126	0.00994121	-0.0346051	-0.0247982	-0.0361011	-0.0329933	0.0776904	-0.0340212
0.791	0.0539916	0.0628679	-0.00782364	0.489907	0.00860744	-0.0339964	-0.0231659	-0.0348138	-0.0348972	0.0833048	-0.0359196
0.792	0.0535063	0.0635423	-0.00850308	0.350016	0.00715779	-0.0333755	-0.02183	-0.018507	-0.036178	0.0796308	-0.0374829
0.793	0.0529161	0.0642476	-0.00890002	0.220326	0.00587541	-0.0327186	-0.0212229	0.0530658	-0.0365624	0.0682976	-0.0387443
0.794	0.0522268	0.0648138	-0.00881654	0.108524	0.00484432	-0.0320703	-0.0213943	0.209651	-0.0359063	0.051796	-0.0395223
0.795	0.0514524	0.0650967	-0.00823246	0.0188761	0.00408079	-0.0314165	-0.0220737	0.430872	-0.0341701	0.0328036	-0.0394576
0.796	0.0507074	0.0650957	-0.00726239	-0.0472786	0.00375234	-0.0305032	-0.0229404	0.666099	-0.0314302	0.0135397	-0.0383816
0.797	0.0500769	0.0648856	-0.00609721	-0.0907682	0.00400045	-0.0289969	-0.023834	0.868992	-0.0279628	-0.00442018	-0.0365874
0.798	0.0496018	0.0645467	-0.00494348	-0.11408	0.00478369	-0.0268792	-0.0247961	1.00961	-0.0241156	-0.020023	-0.0345393
0.799	0.0493346	0.06411	-0.00394739	-0.120684	0.00588637	-0.024475	-0.0258357	1.07479	-0.0201992	-0.0327014	-0.0323998
0.8	0.0492296	0.0635378	-0.00314428	-0.114366	0.00704384	-0.0221769	-0.0267791	1.06485	-0.0161135	-0.0423312	-0.0300294
0.801	0.0491619	0.0628378	-0.00254923	-0.0990142	0.00818816	-0.0203695	-0.0274475	0.989636	-0.0110365	-0.0490709	-0.0272553
0.802	0.0490061	0.0620624	-0.00225941	-0.0783453	0.00949841	-0.0193993	-0.0278004	0.864771	-0.00465683	-0.0532641	-0.0240931
0.803	0.0487185	0.0612676	-0.00235855	-0.0554474	0.0111353	-0.0194269	-0.027873	0.70803	0.00193732	-0.0554983	-0.0207213
0.804	0.0484441	0.0605449	-0.00285864	-0.0326954	0.0130358	-0.0203507	-0.0277568	0.536703	0.00731687	-0.0564608	-0.0173374
0.805	0.0483314	0.0599425	-0.00367825	-0.0118387	0.0150204	-0.0218712	-0.0276358	0.366039	0.0105426	-0.0566149	-0.0142558
0.806	0.0482773	0.0593694	-0.00459752	0.00598968	0.0168293	-0.023621	-0.0277147	0.208238	0.0111974	-0.0562716	-0.0118445
0.807	0.0480915	0.058698	-0.00543151	0.0201596	0.0181137	-0.0252334	-0.0281587	0.0717956	0.00936844	-0.0557307	-0.0102832
0.808	0.0476873	0.0579261	-0.00619211	0.0305114	0.0186516	-0.0264059	-0.0291143	-0.0384377	0.00549425	-0.0551133	-0.00955952
0.809	0.0469871	0.0570987	-0.00690006	0.0373457	0.0185054	-0.0269912	-0.0306345	-0.120663	0.000232636	-0.0543533	-0.00951921
0.81	0.0459394	0.0561851	-0.00747217	0.0411526	0.0180141	-0.0269912	-0.0325295	-0.175496	-0.00560968	-0.0533564	-0.00997416
0.811	0.0445731	0.0551872	-0.00792827	0.0424392	0.01766	-0.0264858	-0.0344707	-0.205491	-0.0112347	-0.0520094	-0.0108836
0.812	0.0429931	0.054218	-0.00829508	0.0417407	0.017811	-0.0256233	-0.0362616	-0.21467	-0.0160427	-0.0501976	-0.0122912
0.813	0.0414866	0.0535	-0.00836881	0.0395554	0.0185286	-0.024643	-0.0377764	-0.20781	-0.0197171	-0.0478611	-0.014161
0.814	0.0404754	0.0532787	-0.00793112	0.0363629	0.0195643	-0.0238363	-0.0386843	-0.18974	-0.0220721	-0.0450302	-0.0164568
0.815	0.0402288	0.0535894	-0.0069634	0.0326242	0.0204862	-0.023361	-0.0383867	-0.164991	-0.022988	-0.0419088	-0.0192186
0.816	0.0406825	0.0543168	-0.00561239	0.0286268	0.0209516	-0.0231271	-0.0362172	-0.137502	-0.0226737	-0.0388128	-0.0223777
0.817	0.0415898	0.0554186	-0.0041167	0.0245443	0.0209689	-0.0229452	-0.0318213	-0.110361	-0.0217125	-0.0359787	-0.0256637
0.818	0.0427893	0.0568334	-0.00269807	0.020623	0.0207248	-0.0226304	-0.0254604	-0.0858329	-0.0206902	-0.0335406	-0.0287951
0.819	0.0442717	0.0583574	-0.00148962	0.0171075	0.0202743	-0.0220947	-0.0179665	-0.0653744	-0.0199802	-0.0317649	-0.0316479
0.82	0.0460484	0.059751	-0.000502777	0.0141549	0.0195853	-0.0214445	-0.0104484	-0.0494712	-0.0197923	-0.0310924	-0.0341719
0.821	0.0479704	0.0608386	0.000355669	0.0120036	0.018593	-0.0208332	-0.00403195	-0.0379113	-0.0202166	-0.0317021	-0.0362227
0.822	0.0497655	0.0615245	0.00112164	0.0110327	0.0171938	-0.0203771	0.000314528	-0.0302941	-0.021286	-0.0332657	-0.0375736
0.823	0.0513082	0.0618255	0.0016945	0.0114621	0.0153349	-0.0202905	0.00203242	-0.0260885	-0.0230061	-0.0351708	-0.0380747
0.824	0.0527186	0.0618249	0.00201867	0.0131254	0.0130268	-0.0208866	0.001139	-0.0246162	-0.0252449	-0.0368277	-0.0377973
0.825	0.0541712	0.0616042	0.00211276	0.0156036	0.0104189	-0.0223632	-0.00191735	-0.0251379	-0.0275702	-0.0378732	-0.0369569
0.826	0.05576	0.0612745	0.00194533	0.0185026	0.0247491	-0.0246318	-0.00645812	-0.0268093	-0.0294319	-0.0381171	-0.0356751
0.827	0.0574503	0.0609581	0.00156833	0.0215961	0.0998762	-0.027353	-0.0117283	-0.0288585	-0.0305786	-0.0374276	-0.0339914
0.828	0.0590823	0.0606959	0.00117194	0.0246434	0.255376	-0.030045	-0.0170725	-0.0309533	-0.0310166	-0.0358504	-0.0319941
0.829	0.0605224	0.0603868	0.000894977	0.0272343	0.451752	-0.0321455	-0.0220855	-0.0331207	-0.0307165	-0.0336954	-0.0298076
0.83	0.0617215	0.0599054	0.000820099	0.0290559	0.632784	-0.0331908	-0.0266242	-0.0354002	-0.0296766	-0.0314177	-0.0277074
0.831	0.062625	0.059308	0.00100639	0.0300622	0.762185	-0.0330926	-0.0305933	-0.0378222	-0.0280829	-0.0295062	-0.0261724
0.832	0.0631046	0.0587575	0.00137562	0.0302564	0.823787	-0.03223	-0.0337164	-0.0403866	-0.0261605	-0.0283376	-0.0256716
0.833	0.0631159	0.0583285	0.00178649	0.0295974	0.81659	-0.0311899	-0.0356223	-0.0429334	-0.0241846	-0.0280469	-0.026456
0.834	0.0628679	0.0579989	0.00223357	0.0281159	0.75028	-0.030362	-0.0362627	-0.0452767	-0.0226685	-0.0285092	-0.0281723
0.835	0.0625754	0.0577069	0.00287599	0.025996	0.640434	-0.0299075	-0.0360853	-0.0472572	-0.0218916	-0.0293835	-0.0296586
0.836	0.0622399	0.0573844	0.00385316	0.0236403	0.504332	-0.0299277	-0.0356385	-0.048605	-0.0214264	-0.030346	-0.0296618
0.837	0.0617132	0.057014	0.00507918	0.021512	0.358158	-0.0303639	-0.0352124	-0.0490681	-0.00213212	-0.0312458	-0.0277223
0.838	0.0608253	0.0566755	0.00632454	0.0197841	0.215572	-0.0309639	-0.034906	-0.0485764	0.0847159	-0.0320121	-0.024246
0.839	0.0595255	0.0564813	0.00742087	0.0184386	0.0869402	-0.0315129	-0.0346926	-0.0471554	0.262456	-0.0325743	-0.0201093
0.84	0.0578947	0.0564726	0.00826217	0.0175564	-0.0208129	-0.0319169	-0.0343549	-0.0449288	0.488336	-0.0328984	-0.0162405
0.841	0.0561024	0.0565984	0.00877739	0.0172122	-0.103808	-0.0320841	-0.0337057	-0.0421374	0.697624	-0.0330312	-0.0131353
0.842	0.0543763	0.0567664	0.00895333	0.0174148	-0.161029	-0.0319606	-0.0328649	-0.0389948	0.846876	-0.03298	0.0106317
0.843	0.052898	0.0569215	0.00878403	0.0181788	-0.194061	-0.03163	-0.0320821	-0.0357569	0.917138	-0.0326711	0.111304
0.844	0.0517502	0.0570214	0.00830937	0.0193928	-0.2061	-0.0311685	-0.0314632	-0.0327588	0.907639	-0.0320187	0.318231
0.845	0.050985	0.0570008	0.00765813	0.0207463	-0.20102	-0.03049	-0.0310277	-0.0301788	0.829562	-0.030972	0.588602
0.846	0.0506662	0.0569155	0.00691928	0.0218909	-0.183101	-0.0294165	-0.0308484	-0.0280785	0.700523	-0.0297069	0.853541
0.847	0.0507862	0.0569572	0.00613217	0.0225619	-0.156843	-0.0278834	-0.0309895	-0.0264856	0.540267	-0.0285569	1.06234
0.848	0.0511682	0.0572247	0.00542741	0.0226515	-0.12653	-0.0261604	-0.0313645	-0.0252617	0.367705	-0.0275959	1.18757
0.849	0.0515596	0.0576711	0.00495727	0.0223009	-0.0957771	-0.0247522	-0.0317322	-0.0243265	0.198994	-0.0265943	1.22125
0.85	0.0518413	0.0582517	0.00469343	0.0217116	-0.067154	-0.0240245	-0.0318313	-0.0238748	0.0464188	-0.0253958	1.16955
0.851	0.0520618	0.058974	0.00453268	0.0209702	-0.0422606	-0.024086	-0.0315676	-0.0239814	-0.0818828	-0.0240308	1.04774
0.852	0.0523864	0.0598136	0.00452438	0.0202232	-0.0221038	-0.0248792	-0.0309978	-0.0244016	-0.181525	-0.0225619	0.875903
0.853	0.053059	0.0606223	0.00477045	0.0197033	-0.00712221	-0.0262456	-0.0301067	-0.0248203	-0.251368	-0.0211483	0.675592
0.854	0.0542574	0.0611999	0.00525558	0.0195305	0.00281598	-0.028073	-0.0288286	-0.0248794	-0.293	-0.0200475	0.467168
0.855	0.056022	0.0613909	0.00593922	0.0197147	0.00816744	-0.0303449	-0.0272174	-0.0242508	-0.309919	-0.0193468	0.267677
0.856	0.0582348	0.0610977	0.00687904	0.0202718	0.00966198	-0.0329586	-0.0254286	-0.0228563	-0.306623	-0.0189219	0.089783
0.857	0.0605072	0.0604105	0.00807154	0.0211025	0.00821747	-0.035542	-0.0236989	-0.0206862	-0.287933	-0.0186426	-0.0583841
0.858	0.0622542	0.0595607	0.00936087	0.0220019	0.00467071	-0.0375055	-0.022393	-0.0176616	-0.258641	-0.0184336	-0.172986
0.859	0.0630767	0.0586984	0.0106728	0.0229122	-0.000104689	-0.038374	-0.0219183	-0.0140289	-0.216754	-0.0182911	-0.253649
0.86	0.0629971	0.0579104	0.0120674	0.0238427	-0.00503525	-0.038085	-0.0224716	-0.0104734	-0.142666	-0.0182921	-0.302409
0.861	0.0622615	0.0572879	0.0135404	0.024752	-0.00922999	-0.0369009	-0.0238734	-0.00768253	-0.0129545	-0.0184251	-0.323054
0.862	0.0611249	0.0569197	0.0149341	0.0256109	-0.0122057	-0.0349726	-0.0257336	-0.0060725	0.168388	-0.0185154	-0.320626
0.863	0.0598697	0.0568272	0.0160433	0.0263168	-0.0137488	-0.0322156	-0.0276216	-0.00572808	0.368987	-0.0184036	-0.300884
0.864	0.0587504	0.056961	0.016753	0.0267051	-0.0139031	-0.0288009	-0.0290095	-0.00648009	0.55264	-0.0180457	-0.269887
0.865	0.0578879	0.0573462	0.0169913	0.026744	-0.0128756	-0.0253419	-0.0294046	-0.00813235	0.693741	-0.0175595	-0.233437
0.866	0.0573541	0.058038	0.0166563	0.0264924	-0.0108965	-0.0224062	-0.0286212	-0.0104171	0.778975	-0.0172614	-0.196252
0.867	0.0571995	0.0589902	0.0157344	0.0260193	-0.00832929	-0.0202454	-0.0268224	-0.0128876	0.805122	-0.0174418	-0.161778
0.868	0.0573666	0.0601467	0.0144074	0.0255165	-0.00567572	-0.018972	-0.0244842	-0.0150908	0.775361	-0.0181789	-0.13243
0.869	0.0577591	0.0614936	0.012924	0.0251832	-0.00332035	-0.0185856	-0.0222524	-0.0166303	0.696452	-0.019452	-0.109257
0.87	0.0582826	0.0630109	0.0114683	0.0251728	-0.0014748	-0.0188793	-0.0206264	-0.0171718	0.578228	-0.0211369	-0.0919135
0.871	0.0588054	0.0646444	0.0102309	0.0257416	-0.000244214	-0.0196148	-0.0197834	-0.0166224	0.433422	-0.0230252	-0.0795614
0.872	0.0592491	0.0661791	0.00934591	0.027064	0.000487996	-0.0206296	-0.0195658	-0.0151294	0.275993	-0.0250123	-0.071443
0.873	0.0595759	0.067286	0.00872829	0.0290118	0.000989126	-0.0206424	-0.0196995	-0.0128518	0.11923	-0.0268096	-0.0668428
0.874	0.0596855	0.0678187	0.00819303	0.0312877	0.00139139	-0.0169352	-0.0200807	-0.00988877	-0.0255358	-0.0277785	-0.0650417
0.875	0.0595289	0.0679339	0.00765035	0.0335885	0.00165838	-0.00884131	-0.0206856	-0.00632485	-0.149875	-0.0274949	-0.0650966
0.876	0.0592193	0.067935	0.00718053	0.0356741	0.00169045	0.00073767	-0.0215167	-0.00222105	-0.24846	-0.0259973	-0.0657704
0.877	0.0589482	0.068017	0.00696765	0.0375191	0.00131412	0.00859499	-0.0226287	0.00236258	-0.318812	-0.0234305	-0.0659996
0.878	0.0588407	0.0681491	0.00709843	0.0392327	0.000430738	0.0130928	-0.0238911	0.00733389	-0.361161	-0.0197726	-0.065114
0.879	0.0588772	0.0681723	0.00747733	0.0407401	-0.000882771	0.013697	-0.0249526	0.0126462	-0.378037	-0.0149188	-0.0627358
0.88	0.059079	0.0680123	0.00800393	0.0418393	-0.0025598	0.0107637	-0.0255618	0.0181941	-0.373509	-0.00896899	-0.0591235
0.881	0.0596369	0.0677687	0.00874034	0.0424894	-0.00438472	0.0052965	-0.0257393	0.0233845	-0.352525	-0.00245397	-0.0552591
0.882	0.0606286	0.0674821	0.00982934	0.0428137	-0.00585934	-0.00158397	-0.0255093	0.0271542	-0.320281	0.00381013	-0.05211
0.883	0.0618626	0.0670127	0.0113664	0.0429806	-0.00666514	-0.00886132	-0.0245979	0.0285982	-0.281531	0.00918166	-0.0501378
0.884	0.0631055	0.066285	0.0133507	0.0431267	-0.00663029	-0.0156618	-0.0226327	0.0275301	-0.240265	0.0133187	-0.0494016
0.885	0.064314	0.0653953	0.0156531	0.0433092	-0.00533072	-0.0215304	-0.0195847	0.02462	-0.199651	0.0159399	-0.0497424
0.886	0.0655928	0.0645407	0.018109	0.0436899	-0.00257156	-0.0264953	-0.0158434	0.0209279	-0.162044	0.0168102	-0.0509265
0.887	0.0669625	0.0639556	0.0206341	0.0445222	0.00120585	-0.0306741	-0.0118848	0.017305	-0.129169	0.0159098	-0.0526218
0.888	0.0683381	0.0637346	0.0231601	0.0457612	0.00533878	-0.0339502	-0.00794665	0.0143157	-0.102219	0.0134099	-0.0543256
0.889	0.0696566	0.0637806	0.0255809	0.0471295	0.00920903	-0.0359675	-0.00398191	0.0123548	-0.0817487	0.00965312	-0.0556227
0.89	0.0708246	0.0639867	0.0277907	0.048449	0.0123558	-0.0363605	0.00012358	0.0115727	-0.0676168	0.00523342	-0.0564794
0.891	0.0715752	0.0643247	0.0296181	0.0496118	0.0146988	-0.0351629	0.00421673	0.0118495	-0.0590996	0.00073614	-0.0570095
0.892	0.0715431	0.0647689	0.030826	0.050577	0.0163821	-0.0329303	0.00779052	0.0129389	-0.0550976	-0.0035307	-0.0572352
0.893	0.070511	0.0651556	0.0313475	0.0514008	0.0174735	-0.0303268	0.0103445	0.014505	-0.0542479	-0.00734271	-0.0572226
0.894	0.0684333	0.0652965	0.0313234	0.0520576	0.017993	-0.0277606	0.0117091	0.0161172	-0.0551062	-0.0103984	-0.0569284
0.895	0.065401	0.0652914	0.0308952	0.052401	0.0179022	-0.0253374	0.0119893	0.0173734	-0.0564213	-0.0124982	-0.0560496
0.896	0.061754	0.0654235	0.030177	0.0523134	0.0170285	-0.0229249	0.0114876	0.0179642	-0.0573358	-0.013738	-0.0543947
0.897	0.0579658	0.0658405	0.0293146	0.0517776	0.0152324	-0.0203635	0.0106998	0.0177788	-0.0575295	-0.0144369	-0.0520567
0.898	0.0543659	0.0665543	0.0284841	0.0509532	0.0125059	-0.0176585	0.0101277	0.0170665	-0.057091	-0.0149359	-0.049176
0.899	0.0510658	0.0675111	0.0278312	0.0500904	0.00907783	-0.0149541	0.0100738	0.0161508	-0.0562441	-0.0155056	-0.0458525
0.9	0.0480686	0.0685018	0.0273728	0.0491664	0.00560569	-0.0124671	0.0105754	0.0149868	-0.0553005	-0.0163596	-0.0421657
0.901	0.0454341	0.0692656	0.0270432	0.04797	0.00282117	-0.010452	0.0114327	0.0133378	-0.0546014	-0.0176345	-0.0381517
0.902	0.0432618	0.0697508	0.0268755	0.0465417	0.000978416	-0.00909373	0.0123609	0.0111777	-0.0543817	-0.019339	-0.0339488
0.903	0.0415484	0.0700887	0.0270056	0.0450673	-1.93e-05	-0.00845215	0.0131257	0.0087962	-0.0547808	-0.0213877	-0.0298011
0.904	0.0402145	0.0703763	0.0274926	0.0436195	-0.000306771	-0.00856597	0.0134369	0.00672428	-0.0557653	-0.0236818	-0.0257614
0.905	0.0392125	0.070606	0.0282676	0.0423297	-5.96e-05	-0.0095138	0.0127767	0.00537254	-0.056998	-0.0261304	-0.0218185
0.906	0.0385842	0.0707505	0.029219	0.0414353	0.000573082	-0.0113101	0.0106763	0.00473866	-0.0579863	-0.028593	-0.0182184
0.907	0.038338	0.0708256	0.0302227	0.0410041	0.00151555	-0.0137513	0.00721756	0.0046618	-0.0582971	-0.03081	-0.0152402
0.908	0.0382963	0.070921	0.0310499	0.0409385	0.0026343	-0.0163785	0.00293268	0.0050717	-0.057644	-0.0325293	-0.0130469
0.909	0.0382454	0.0712016	0.0314133	0.0412313	0.00383815	-0.0186773	-0.00177315	0.00591492	-0.0559088	-0.0337028	-0.0117553
0.91	0.0381036	0.071764	0.0312549	0.0418861	0.00519427	-0.0203906	-0.00677322	0.00708509	-0.0531186	-0.0343552	-0.0112143
0.911	0.0378764	0.0724795	0.0307802	0.0427486	0.00671967	-0.0215611	-0.0118741	0.00841746	-0.0494581	-0.0344807	-0.0111031
0.912	0.0376202	0.0731279	0.0301782	0.0436372	0.0083209	-0.022313	-0.0166342	0.00973471	-0.0452938	-0.0341961	-0.0113585
0.913	0.0373897	0.0736193	0.0294991	0.0444715	0.00998212	-0.0228436	-0.0205215	0.0109362	-0.0410225	-0.0336846	-0.0120684
0.914	0.0371384	0.0739488	0.0288034	0.0452448	0.0118329	-0.0234454	-0.0231365	0.0119412	-0.0368282	-0.033049	-0.0132022
0.915	0.036743	0.0741096	0.0282485	0.0459365	0.0140399	-0.0243094	-0.0243074	0.0124738	-0.0328035	-0.0323055	-0.0146969
0.916	0.0361519	0.0740949	0.0279233	0.046405	0.0165483	-0.0254708	-0.0240364	0.0121541	-0.0292306	-0.0314501	-0.0164836
0.917	0.0355179	0.0739361	0.0276927	0.046454	0.0189199	-0.0268814	-0.022433	0.0109061	-0.0264881	-0.0306633	-0.0184045
0.918	0.0351717	0.0737544	0.0273152	0.0460453	0.0206082	-0.0284086	-0.0197427	0.00897625	-0.024844	-0.0303787	-0.0202907
0.919	0.0354099	0.0735919	0.0266354	0.0453186	0.0213975	-0.0298347	-0.0163862	0.0066471	-0.0243711	-0.0309838	-0.0219689
0.92	0.0363318	0.0733319	0.0256528	0.0445001	0.0215307	-0.030921	-0.012877	0.00418791	-0.0248951	-0.0325508	-0.0233104
0.921	0.0378584	0.0729869	0.024538	0.0438154	0.0214513	-0.0315132	-0.009638	0.00193835	-0.026088	-0.0348266	-0.0242829
0.922	0.0396866	0.0727603	0.0235694	0.0433307	0.021422	-0.0315415	-0.00682969	0.000302411	-0.0276501	-0.0374359	-0.0246492
0.923	0.0413876	0.07279	0.0228793	0.0429695	0.021344	-0.030948	-0.00443738	-0.000376203	-0.0293322	-0.0401326	-0.0240091
0.924	0.0427551	0.0730479	0.0222398	0.042753	0.020981	-0.0297257	-0.00262988	7.18e-05	-0.0308801	-0.0427707	-0.0222007
0.925	0.0437703	0.0734048	0.0212828	0.0428256	0.0203318	-0.0279543	-0.0017924	0.0016406	-0.0321112	-0.0451784	-0.019182
0.926	0.0443768	0.0737184	0.0199255	0.0432937	0.0195157	-0.0257547	-0.00213669	0.0040844	-0.0330682	-0.0471437	-0.0148279
0.927	0.0445748	0.0738896	0.0184048	0.0441903	0.0184641	-0.0232257	-0.00352693	0.00686881	-0.0339618	-0.0484865	-0.00923086
0.928	0.0444663	0.0738956	0.01693	0.0453585	0.0171081	-0.0204272	-0.00561424	0.00945137	-0.0348331	-0.0492452	-0.00284084
0.929	0.0441127	0.0738055	0.015515	0.0464776	0.0156458	-0.0174589	-0.00791186	0.0115735	-0.0355132	-0.049597	0.00387355
0.93	0.0435471	0.0736969	0.014129	0.0474091	0.0144304	-0.0144546	-0.00991305	0.0130811	-0.035948	-0.0495208	0.010519
0.931	0.0428548	0.0735756	0.0128615	0.0481978	0.0138477	-0.011486	-0.0113823	0.0136629	-0.0362389	-0.0487988	0.016686
0.932	0.0421475	0.0734085	0.011899	0.0487501	0.014142	-0.00858893	-0.0123281	0.0130617	-0.036456	-0.0473082	0.0220635
0.933	0.0415584	0.0731658	0.0113516	0.0489098	0.0151483	-0.00583259	-0.0126261	0.0113361	-0.0365605	-0.0451661	0.0264565
0.934	0.0412263	0.0728219	0.011216	0.0486984	0.0165563	-0.00328762	-0.0120287	0.00879752	-0.0364705	-0.0426424	0.0297812
0.935	0.0412202	0.0723918	0.0114307	0.0481638	0.0182579	-0.000907676	-0.0104757	0.00594257	-0.0362041	-0.0400203	0.0321485
0.936	0.0414888	0.071946	0.0118593	0.0473579	0.0202165	0.00145772	-0.00817387	0.00332889	-0.0358378	-0.0375614	0.0338761
0.937	0.0419392	0.0715454	0.0123237	0.0465186	0.0223212	0.00386899	-0.00555731	0.00134775	-0.0353159	-0.0354879	0.0355263
0.938	0.0425243	0.0711814	0.0126953	0.0458704	0.0243044	0.00629989	-0.00313364	0.000138452	-0.0344685	-0.0339215	0.0377471
0.939	0.0431611	0.0707567	0.0128948	0.045485	0.0257172	0.00876235	-0.00114038	-0.0004301	-0.0331838	-0.032884	0.040718
0.94	0.0436916	0.0702304	0.0128577	0.045411	0.0262613	0.0111903	0.000544195	-0.000692847	-0.0314873	-0.0324356	0.0438807
0.941	0.0440411	0.0697838	0.0125792	0.0456525	0.0260821	0.0133677	0.00202803	-0.000911128	-0.0295649	-0.032639	0.0464218
0.942	0.0442784	0.0696902	0.0120953	0.0461746	0.0254766	0.0150744	0.00313597	-0.00111416	-0.0277642	-0.0333317	0.0477379
0.943	0.0444388	0.07002	0.011527	0.0469641	0.0246781	0.0161246	0.0124469	-0.00135546	-0.0263951	-0.0341791	0.0474945
0.944	0.04447	0.070506	0.0110962	0.0479303	0.0240583	0.0163398	0.0656028	-0.00184104	-0.0255	-0.0348074	0.0457667
0.945	0.0443573	0.0708187	0.010894	0.0489231	0.0239972	0.0157362	0.207204	-0.00266587	-0.0249773	-0.0349406	0.0429378
0.946	0.0441666	0.0709575	0.0108798	0.0498621	0.0246564	0.0146868	0.435281	-0.00377871	-0.0248084	-0.0345877	0.039245
0.947	0.0439958	0.0711271	0.0111253	0.0506972	0.0261572	0.0137107	0.694643	-0.00513197	-0.0250249	-0.0338234	0.0347875
0.948	0.0439352	0.0713876	0.0117866	0.0514224	0.0285525	0.0132004	0.923744	-0.0067067	-0.0256897	-0.0325319	0.0298099
0.949	0.0440897	0.0717083	0.0128828	0.0520988	0.0316573	0.0133542	1.08287	-0.00857784	-0.0270264	-0.0305975	0.0246388
0.95	0.0445561	0.0721609	0.0142478	0.0527203	0.0352205	0.0141441	1.15487	-0.0106982	-0.0292245	-0.0273478	0.0196273
0.951	0.0453777	0.0728622	0.0156957	0.0532362	0.0389344	0.0152848	1.14007	-0.0125797	-0.0320146	-0.0212084	0.015128
0.952	0.0465841	0.0738025	0.0170939	0.0536696	0.0423517	0.0163553	1.05049	-0.0137038	-0.0347174	-0.0119694	0.0112642
0.953	0.0481189	0.0748155	0.0183537	0.0540007	0.0450696	0.0170016	0.904627	-0.013996	-0.0366881	-0.00202682	0.00788744
0.954	0.0497724	0.0757277	0.0195574	0.0540995	0.0467427	0.0169779	0.723221	-0.0135371	-0.0374002	0.00584512	0.00476541
0.955	0.0513306	0.0763912	0.0209058	0.0539408	0.0469899	0.0161299	0.526525	-0.0123674	-0.031399	0.010193	0.00171274
0.956	0.0525754	0.0766718	0.022396	0.0536121	0.0456217	0.0145062	0.332348	-0.010668	-0.00667271	0.0107765	-0.00123759
0.957	0.0531934	0.0765947	0.023751	0.0530836	0.0428789	0.0124299	0.154494	-0.00858725	0.0398178	0.00816462	-0.00375127
0.958	0.0529811	0.076312	0.0246923	0.0523084	0.0392824	0.010304	0.00216944	-0.00612268	0.0945275	0.00325862	-0.00561778
0.959	0.0520282	0.075902	0.025172	0.0513718	0.0353856	0.00831396	-0.119472	-0.00349634	0.141209	-0.00309816	-0.00699797
0.96	0.0505524	0.0753628	0.0253376	0.0503037	0.0315655	0.0064053	-0.208603	-0.00118969	0.170334	-0.0101362	-0.00775993
0.961	0.0487632	0.0747602	0.0253431	0.0490332	0.0278169	0.00446054	-0.266134	0.000464251	0.178528	-0.0168956	-0.00714222
0.962	0.0469258	0.0742811	0.0253027	0.0475868	0.0240295	0.00238587	-0.295003	0.00141547	0.166805	-0.0221152	-0.0044674
0.963	0.0452639	0.0740932	0.0253141	0.0461722	0.0204592	0.000101012	-0.299716	0.00187248	0.138856	-0.024712	0.000241355
0.964	0.0438003	0.0742544	0.0254255	0.0450469	0.0176429	-0.00239607	-0.285803	0.00213885	0.0997201	-0.0243883	0.00623025
0.965	0.0424512	0.0747929	0.0256874	0.0442831	0.0160439	-0.00490548	-0.258869	0.00221841	0.0546081	-0.0217746	0.0122846
0.966	0.0412063	0.0756749	0.0261479	0.0437517	0.0158741	-0.00710596	-0.223989	0.00192976	0.00814075	-0.0180668	0.0171549
0.967	0.0401191	0.07672	0.0268103	0.043339	0.0170095	-0.00878028	-0.185516	0.00140255	-0.0359857	-0.0143818	0.0198537
0.968	0.0391963	0.0777044	0.0276668	0.0430041	0.0190674	-0.00985232	-0.146751	0.000993837	-0.0750858	-0.0114777	0.0197903
0.969	0.0384074	0.0785131	0.0286452	0.0427076	0.0216389	-0.0102567	-0.11	0.000916632	-0.107439	-0.00988593	0.0170022
0.97	0.0377328	0.0791672	0.0296234	0.0424526	0.0242743	-0.00993589	-0.0769938	0.00116385	-0.132308	-0.00986012	0.0121737
0.971	0.0371991	0.0797577	0.0305326	0.0423035	0.026476	-0.00899027	-0.0489574	0.00157148	-0.149824	-0.0112287	0.0062185
0.972	0.0368878	0.0803608	0.0313242	0.0423875	0.0279649	-0.00773451	-0.0265121	0.00209874	-0.160557	-0.0136179	-9.84e-05
0.973	0.0368564	0.0809315	0.0319329	0.0428789	0.0287129	-0.00653246	-0.00971458	0.00301677	-0.165201	-0.01678	-0.00625241
0.974	0.0371095	0.0812928	0.0322571	0.0438228	0.0287543	-0.00553929	0.00183964	0.00451776	-0.164596	-0.0205606	-0.0117143
0.975	0.0375944	0.0813003	0.0321996	0.0450458	0.0282129	-0.0046146	0.00873083	0.00648716	-0.159729	-0.0246881	-0.0157667
0.976	0.0382403	0.0808989	0.0318243	0.0463932	0.02736	-0.00359619	0.0114264	0.0087368	-0.151591	-0.0286726	-0.0179506
0.977	0.0391135	0.0800867	0.0313054	0.0478864	0.0263869	-0.00265554	0.0105672	0.0110692	-0.141224	-0.0319291	-0.0183593
0.978	0.0403495	0.0789885	0.0307372	0.0494859	0.0252904	-0.00212414	0.00734789	0.0132366	-0.129747	-0.0340766	-0.017184
0.979	0.0419504	0.0778679	0.0302233	0.0509532	0.0240294	-0.00200259	0.00305529	0.0149277	-0.117966	-0.0350493	-0.0144605
0.98	0.0438235	0.0769308	0.0299375	0.0520493	0.0226888	-0.00200619	-0.00155156	0.0157618	-0.106344	-0.0349588	-0.0103689
0.981	0.0458062	0.0761547	0.0299189	0.0526309	0.0216401	-0.00202927	-0.00607099	0.015474	-0.0953889	-0.0339582	-0.00537313
0.982	0.0475703	0.0754463	0.0301489	0.0526002	0.0214018	-0.00228565	-0.010104	0.0141216	-0.0855263	-0.0322344	-6.09e-05
0.983	0.0488004	0.0748667	0.0307707	0.0519293	0.0222013	-0.00301049	-0.0133032	0.0119507	-0.0769244	-0.0301165	0.00498199
0.984	0.0495054	0.074533	0.0319005	0.0506571	0.0238243	-0.00424157	-0.0155184	0.00919011	-0.0697795	-0.0280701	0.00932279
0.985	0.0498954	0.0744563	0.0334241	0.0488892	0.0257973	-0.00588374	-0.0167915	0.00612723	-0.0643278	-0.0265138	0.0127916
0.986	0.0500458	0.0746208	0.0351222	0.0468966	0.0276428	-0.00770798	-0.0172386	0.00298613	-0.0605378	-0.0256844	0.0153684
0.987	0.0499146	0.0750481	0.0368005	0.0450475	0.0290958	-0.0093299	-0.0170187	-0.00024108	-0.0581274	-0.0257291	0.0171178
0.988	0.0494651	0.0756823	0.0382602	0.0435874	0.0300123	-0.0103943	-0.0164555	-0.00342414	-0.0567424	-0.0267217	0.0181488
0.989	0.0486647	0.0763957	0.0392805	0.0426172	0.0301749	-0.0108588	-0.015954	-0.00617853	-0.0560701	-0.0284583	0.0184963
0.99	0.0475803	0.077056	0.0396539	0.0422061	0.0295582	-0.0109665	-0.0156961	-0.00828618	-0.0558338	-0.0305387	0.0181819
0.991	0.0463848	0.0775296	0.0392452	0.0424579	0.0284972	-0.0108849	-0.0157703	-0.00976907	-0.0557261	-0.032585	0.0173836
0.992	0.0452129	0.0777852	0.0380788	0.0434105	0.0272876	-0.0106199	-0.0164466	-0.0106961	-0.0555611	-0.0342795	0.0164091
0.993	0.0441232	0.0778518	0.0363707	0.0448711	0.0260132	-0.0100911	-0.0178716	-0.0111168	-0.0553143	-0.0354725	0.0155496
0.994	0.0431576	0.0776877	0.0344779	0.0464911	0.0247272	-0.00905222	-0.0197345	-0.0110569	-0.0548195	-0.0362275	0.0150644
0.995	0.0424474	0.0772499	0.0327733	0.0479888	0.023504	-0.00725116	-0.0213616	-0.0106109	-0.0537747	-0.0366901	0.0150889
0.996	0.0422104	0.0765297	0.0314844	0.0492702	0.0225103	-0.00467603	-0.0220377	-0.00998411	-0.0521103	-0.0369036	0.0154969
0.997	0.0425709	0.0755291	0.030636	0.0502956	0.0220225	-0.00146978	-0.0214691	-0.00931326	-0.050011	-0.0367277	0.0159753
0.998	0.0435541	0.0743359	0.0301718	0.0510029	0.0221161	0.0021321	-0.0199314	-0.00861892	-0.047638	-0.0360335	0.016097
0.999	0.0451404	0.0731613	0.0300765	0.0514263	0.0224848	0.00571242	-0.0177929	-0.00803095	-0.0450989	-0.0348792	0.0154881
1	0.0471424	0.0722347	0.0303607	0.0515939	0.02268	0.00878446	-0.0150479	-0.00782819	-0.0426394	-0.0334581	0.0141544
1.001	0.0492877	0.0717068	0.0309576	0.0513556	0.0222013	0.0110533	-0.0114437	-0.00822994	-0.0406098	-0.0319976	0.0124492
1.002	0.0513991	0.0716385	0.0316796	0.0505367	0.0205041	0.0125212	-0.00690491	-0.00928791	-0.0391931	-0.0306208	0.0108016
1.003	0.0532865	0.0719833	0.0323824	0.04923	0.0173251	0.0132852	-0.00184413	-0.0108244	-0.0382783	-0.0290335	0.00982089
1.004	0.0546688	0.0725863	0.0331304	0.0477583	0.0127863	0.0132601	0.00278123	-0.0123196	-0.0374163	-0.0264614	0.0104436
1.005	0.0553847	0.0732094	0.0342113	0.0464419	0.00727835	0.0121974	0.00575233	-0.0130916	-0.0358826	-0.0222382	0.0134618
1.006	0.0555136	0.0736199	0.0359743	0.0456012	0.00154791	0.0100112	0.00600615	-0.0125651	-0.0331004	-0.0162263	0.0188965
1.007	0.0552481	0.0737355	0.038487	0.0456463	-0.00336119	0.0071459	0.00310118	-0.0102486	-0.0289512	-0.00870716	0.0260083
1.008	0.0547829	0.0736637	0.0414562	0.0471033	-0.00641782	0.00448696	-0.00253821	-0.0058763	-0.0236007	-0.00021188	0.0339904
1.009	0.0542447	0.073644	0.0445513	0.0503788	-0.00691991	0.00274616	-0.010006	0.00033673	-0.0172238	0.00873345	0.0426172
1.01	0.0536457	0.0739114	0.0476035	0.0553199	-0.00467891	0.00218926	-0.0184078	0.00788027	-0.00991902	0.0178614	0.0521093
1.011	0.0529258	0.0745795	0.05051	0.0612996	0.000149954	0.00289592	-0.0269176	0.0162541	-0.00172316	0.0271774	0.0626535
1.012	0.0520749	0.0756354	0.0531532	0.0677462	0.00730758	0.00479566	-0.0347363	0.025067	0.00737008	0.0367644	0.074347
1.013	0.0512544	0.0769514	0.0554487	0.0742944	0.0163719	0.00764979	-0.0412361	0.0341388	0.0173018	0.04664	0.0872251
1.014	0.0507053	0.0783604	0.0574449	0.080699	0.0267473	0.0113174	-0.0459145	0.0435679	0.0278339	0.0567047	0.100922
1.015	0.0505577	0.0797323	0.0593941	0.0868995	0.0379468	0.0157172	-0.0480798	0.0535535	0.038607	0.0666687	0.114621
1.016	0.0507529	0.0809488	0.0615911	0.0928436	0.0496286	0.0205719	-0.0468624	0.064024	0.0491845	0.0761828	0.127589
1.017	0.051035	0.081947	0.0641528	0.0982785	0.0611642	0.0255232	-0.0417228	0.0744155	0.0591225	0.0849489	0.139513
1.018	0.0511319	0.0827478	0.0670143	0.102879	0.0715837	0.0303191	-0.0328627	0.0838581	0.068144	0.0925733	0.150356
1.019	0.0510097	0.0834147	0.0698941	0.106438	0.0800327	0.0349347	-0.0211188	0.0916981	0.0760568	0.0985503	0.16004
1.02	0.0508455	0.0840726	0.0723368	0.109039	0.0859636	0.0396284	-0.00750856	0.0979062	0.0825915	0.102561	0.168086
1.021	0.0507687	0.0848811	0.0740396	0.111035	0.0890879	0.0445181	0.00718075	0.102875	0.0876132	0.104731	0.173669
1.022	0.0506979	0.0859191	0.074994	0.112747	0.089421	0.0492534	0.0223026	0.107039	0.0913998	0.105556	0.176316
1.023	0.0504614	0.0870889	0.0752595	0.114249	0.0873215	0.0533301	0.0368937	0.110734	0.0944806	0.105647	0.176403
1.024	0.0499993	0.0881273	0.0747734	0.11547	0.0834931	0.0563708	0.0496061	0.114086	0.0973382	0.105537	0.174713
1.025	0.0494464	0.0887219	0.0735006	0.116332	0.0787835	0.0582917	0.0592196	0.117153	0.100411	0.105786	0.171949
1.026	0.0490214	0.0887228	0.0717093	0.116818	0.073787	0.0594428	0.0652538	0.120203	0.104153	0.107097	0.168884
1.027	0.0487852	0.0883003	0.0699232	0.117214	0.0689408	0.0601463	0.068106	0.123686	0.109039	0.110112	0.166226
1.028	0.0487059	0.0877741	0.0685834	0.118221	0.0648689	0.0603002	0.0686494	0.127969	0.115516	0.115213	0.164198
1.029	0.0488803	0.0873074	0.0678477	0.120406	0.0621664	0.0598359	0.067876	0.132998	0.123693	0.12226	0.16269
1.03	0.0494174	0.0868754	0.0676652	0.123628	0.0611611	0.0590656	0.0668673	0.138139	0.133076	0.130338	0.161723
1.031	0.0502993	0.0864554	0.0678761	0.127084	0.0620471	0.0584732	0.066756	0.142414	0.142786	0.138078	0.16143
1.032	0.0514828	0.0861468	0.0682154	0.129678	0.0647925	0.0585235	0.0685212	0.14481	0.151809	0.144325	0.161673
1.033	0.0529615	0.0861905	0.0683582	0.130563	0.0688888	0.0595091	0.072722	0.144457	0.158966	0.148491	0.161943
1.034	0.0547984	0.0868505	0.0680551	0.129462	0.0734487	0.0613518	0.0791789	0.141038	0.163223	0.150319	0.161769
1.035	0.0571836	0.0882245	0.0671999	0.126498	0.0774885	0.06356	0.0869324	0.134947	0.16414	0.149548	0.160886
1.036	0.0602808	0.090251	0.0657972	0.122046	0.0802618	0.0653804	0.0947373	0.126855	0.161741	0.145978	0.158897
1.037	0.0640132	0.0927846	0.0639815	0.116771	0.0816589	0.0658093	0.10164	0.117206	0.156339	0.139658	0.155545
1.038	0.068116	0.0955766	0.0619334	0.111424	0.0820921	0.0630023	0.107131	0.106302	0.148515	0.131065	0.151048
1.039	0.0723217	0.0983505	0.0597574	0.106437	0.0818414	0.0537951	0.110866	0.0947763	0.138882	0.120896	0.145764
1.04	0.0764321	0.100949	0.0575659	0.101809	0.0809066	0.0349994	0.112509	0.0834614	0.128174	0.109727	0.140033
1.041	0.0802665	0.103293	0.0554346	0.0975003	0.0793496	0.00589391	0.111934	0.0729713	0.117156	0.0982458	0.134338
1.042	0.0835885	0.105261	0.0533196	0.0936795	0.0772718	-0.0308807	0.109118	0.0636871	0.106057	0.0873049	0.129291
1.043	0.0861316	0.106763	0.0512886	0.0904995	0.0746977	-0.0705819	0.103891	0.0558423	0.0948009	0.0774978	0.125509
1.044	0.0878108	0.107763	0.0496166	0.0878702	0.0717006	-0.107721	0.0963271	0.049597	0.083774	0.0690413	0.123534
1.045	0.0888432	0.108172	0.0485177	0.0856344	0.0684643	-0.137304	0.0871731	0.0450539	0.0737645	0.062098	0.123622
1.046	0.0894741	0.107939	0.0480283	0.0838551	0.0652125	-0.156688	0.0775344	0.0420627	0.0652498	0.0569551	0.125744
1.047	0.0897182	0.107085	0.048167	0.0826044	0.0620456	-0.166117	0.0682988	0.0401671	0.0581623	0.0537306	0.130025
1.048	0.0894602	0.10562	0.0489962	0.0816312	0.0588833	-0.1674	0.0599361	0.0389134	0.0522535	0.0520229	0.136838
1.049	0.0886606	0.103613	0.0505438	0.0805433	0.0555711	-0.163323	0.0528721	0.0379808	0.0473544	0.0510509	0.1465
1.05	0.0874452	0.101338	0.0527327	0.079073	0.0520498	-0.158082	0.0476767	0.0372064	0.0432787	0.0502376	0.159208
1.051	0.0859728	0.0992224	0.0553808	0.0771377	0.0483868	-0.156447	0.0444771	0.0367032	0.0396192	0.049384	0.17511
1.052	0.0842488	0.0976243	0.0582939	0.0748859	0.044504	-0.161421	0.0427993	0.0366467	0.0359405	0.0483099	0.194137
1.053	0.0822614	0.0966314	0.0613169	0.0726908	0.0403725	-0.172935	0.0421879	0.0370789	0.0321876	0.0469188	0.215861
1.054	0.0801488	0.0960508	0.0643418	0.0710934	0.0365309	-0.188514	0.0423892	0.0379646	0.0286385	0.0456327	0.239679
1.055	0.078039	0.0955495	0.0672994	0.0706334	0.0336849	-0.204403	0.0430284	0.0391592	0.0255182	0.0450873	0.265008
1.056	0.0759825	0.0948922	0.070042	0.0714921	0.0319867	-0.216328	0.0435997	0.0405532	0.0228391	0.0454927	0.291251
1.057	0.0740871	0.0941634	0.0722864	0.0735241	0.0312395	-0.220295	0.0438962	0.0423246	0.0205219	0.046779	0.317505
1.058	0.0725137	0.0936121	0.0738012	0.0767348	0.0314751	-0.213603	0.0441335	0.044694	0.0185587	0.0489597	0.342749
1.059	0.0713484	0.0932633	0.0746075	0.0811557	0.0329306	-0.195358	0.0444842	0.0475251	0.0171206	0.0520409	0.366558
1.06	0.0704944	0.0928344	0.0748932	0.0862981	0.0356301	-0.166247	0.0448725	0.0503701	0.0163384	0.055807	0.388964
1.061	0.0696825	0.0920516	0.0747996	0.0912499	0.0391861	-0.128202	0.0453624	0.0528232	0.0160788	0.0598713	0.409648
1.062	0.0687088	0.0909203	0.0743999	0.0951706	0.0430913	-0.0842027	0.0463727	0.0547642	0.01621	0.0639566	0.427921
1.063	0.0676161	0.0896012	0.0738166	0.0975873	0.0470377	-0.0377642	0.0482429	0.0562527	0.0166873	0.068161	0.44332
1.064	0.0665277	0.0882394	0.0733085	0.0984765	0.0508458	0.00783333	0.0509946	0.0574616	0.0173778	0.0728147	0.45583
1.065	0.0655599	0.0869276	0.0731476	0.0980514	0.054461	0.0498752	0.0548405	0.0586769	0.0182986	0.0779175	0.465658
1.066	0.0648616	0.0856387	0.0734172	0.096498	0.0578409	0.0861999	0.0602554	0.0600403	0.0196946	0.0829987	0.472955
1.067	0.0644479	0.0842968	0.0740494	0.0940739	0.0605692	0.115254	0.0674797	0.0614908	0.0215997	0.0875933	0.477893
1.068	0.0641946	0.0829364	0.0750146	0.0912374	0.0619097	0.136202	0.0765621	0.0630834	0.0237381	0.0916087	0.48077
1.069	0.0640567	0.0816877	0.0763849	0.0884645	0.0613797	0.149072	0.0875736	0.065249	0.0259043	0.0952722	0.48187
1.07	0.0641088	0.0807334	0.0781899	0.0861712	0.0591377	0.154645	0.100476	0.0687136	0.0282598	0.0989848	0.481272
1.071	0.0644154	0.080323	0.0803041	0.0849182	0.0557654	0.154023	0.114934	0.0740142	0.0313311	0.103284	0.478749
1.072	0.0648845	0.0806437	0.0825701	0.0853689	0.0518948	0.148492	0.13034	0.0810881	0.0358213	0.10891	0.473603
1.073	0.0652718	0.0816742	0.0849089	0.0879795	0.0480303	0.139629	0.14624	0.0895285	0.0423187	0.116524	0.464687
1.074	0.0653868	0.0832506	0.0871402	0.0929439	0.0445734	0.12905	0.16271	0.0989202	0.0510326	0.125985	0.451192
1.075	0.0651472	0.0851789	0.0888949	0.100225	0.0419364	0.118289	0.180114	0.108674	0.0616918	0.136422	0.43276
1.076	0.0644483	0.087205	0.0899076	0.109365	0.0404038	0.108864	0.198789	0.117994	0.0734616	0.14703	0.40831
1.077	0.0632385	0.0890374	0.0902097	0.119508	0.0399692	0.101813	0.218923	0.12612	0.0852243	0.15736	0.375737
1.078	0.0616538	0.0904935	0.0899547	0.12969	0.0404916	0.097255	0.240111	0.132467	0.0961762	0.167328	0.333215
1.079	0.0599536	0.0915449	0.0891983	0.139037	0.0417507	0.0948055	0.261109	0.136668	0.105797	0.176971	0.28027
1.08	0.0584526	0.0923174	0.0878631	0.146911	0.0433055	0.0939654	0.280462	0.138487	0.113532	0.186075	0.217504
1.081	0.057437	0.0930119	0.0858619	0.152987	0.0447235	0.0941316	0.297197	0.137833	0.118909	0.194346	0.146111
1.082	0.0570062	0.0937264	0.0832291	0.157202	0.0458634	0.0947369	0.310841	0.13499	0.121643	0.201686	0.0678827
1.083	0.057111	0.0944011	0.0800738	0.159712	0.0467018	0.0951991	0.32116	0.130514	0.121742	0.208003	-0.0147814
1.084	0.0577022	0.0949128	0.0764868	0.160751	0.0471625	0.0949588	0.328057	0.124887	0.119589	0.213257	-0.0989423
1.085	0.0586781	0.095269	0.0726063	0.16063	0.0470974	0.0938888	0.331617	0.118484	0.115673	0.217721	-0.181397
1.086	0.0598178	0.0956042	0.0686535	0.159805	0.0462714	0.0921945	0.332171	0.111714	0.110392	0.221836	-0.259068
1.087	0.0608556	0.0959447	0.0648108	0.158712	0.0446109	0.0899057	0.330109	0.105087	0.104069	0.226065	-0.329106
1.088	0.0615733	0.0961961	0.0612384	0.157602	0.0423198	0.0869573	0.325652	0.09925	0.0968913	0.230971	-0.388876
1.089	0.0618555	0.0962848	0.0581786	0.156679	0.0395121	0.0835235	0.319101	0.0948991	0.0890463	0.237022	-0.436322
1.09	0.061667	0.0962173	0.0557992	0.156216	0.0361762	0.079868	0.311074	0.0925573	0.0810467	0.244378	-0.470255
1.091	0.0610793	0.0960789	0.0541787	0.15646	0.032558	0.076135	0.302166	0.0924708	0.0736927	0.253157	-0.490451
1.092	0.0603415	0.0959682	0.053416	0.157544	0.0292721	0.0723763	0.29264	0.0947677	0.0676783	0.263492	-0.498118
1.093	0.0597531	0.0958776	0.0534511	0.159388	0.0272269	0.0686178	0.282719	0.0996252	0.0630766	0.275236	-0.496008
1.094	0.059522	0.0956842	0.0539738	0.161681	0.0275282	0.0650748	0.272919	0.107152	0.0585544	0.288005	-0.487842
1.095	0.0597901	0.095315	0.0542907	0.164106	0.0312164	0.0621957	0.263879	0.117261	0.050731	0.301366	-0.477777
1.096	0.060563	0.0948006	0.0530269	0.166431	0.0389418	0.0603181	0.256084	0.129709	0.0346383	0.314745	-0.469918
1.097	0.0616137	0.0942476	0.0484121	0.168422	0.0507147	0.0596445	0.249843	0.144184	0.00515911	0.327547	-0.467664
1.098	0.0625566	0.0938527	0.0389922	0.169895	0.0654525	0.0604021	0.245187	0.160396	-0.0418293	0.339421	-0.473337
1.099	0.0629133	0.0938671	0.0237189	0.170676	0.0805715	0.0623127	0.241617	0.177975	-0.109177	0.350196	-0.48806
1.1	0.0621123	0.0946091	0.00144197	0.170531	0.0924452	0.0638288	0.238051	0.196383	-0.198373	0.359661	-0.511447
1.101	0.0595406	0.0963062	-0.0291903	0.169407	0.0974453	0.0621032	0.233247	0.215051	-0.309225	0.367355	-0.54152
1.102	0.0546312	0.098675	-0.0691654	0.167513	0.0925911	0.0537866	0.225834	0.233476	-0.439509	0.372478	-0.57528
1.103	0.0468984	0.100799	-0.118584	0.164932	0.0755442	0.036166	0.213188	0.251287	-0.584831	0.374056	-0.609426
1.104	0.036016	0.101425	-0.176575	0.161478	0.0444742	0.00771778	0.191052	0.2682	-0.738808	0.370569	-0.640745
1.105	0.021989	0.0992794	-0.241509	0.170765	-0.00165555	-0.0321584	0.154715	0.283863	-0.893679	0.358962	-0.666233
1.106	0.00507788	0.0932147	-0.311421	0.251633	-0.0624568	-0.0833034	0.100115	0.297857	-1.04138	0.334471	-0.683314
1.107	-0.0145104	0.0821445	-0.384315	0.502105	-0.135732	-0.144674	0.0245545	0.309841	-1.17462	0.291663	-0.690268
1.108	-0.0366998	0.0650008	-0.458201	0.996418	-0.217749	-0.214288	-0.072514	0.319448	-1.28747	0.225892	-0.686489
1.109	-0.0613197	0.0409729	-0.531317	1.74208	-0.30397	-0.289207	-0.188949	0.326261	-1.37574	0.134784	-0.672266
1.11	-0.0879677	0.0097633	-0.602369	2.69193	-0.389894	-0.365868	-0.319911	0.330059	-1.43725	0.019324	-0.648353
1.111	-0.116189	-0.0284386	-0.670494	3.7713	-0.471777	-0.440746	-0.458365	0.330766	-1.47169	-0.11592	-0.615845
1.112	-0.145671	-0.0731401	-0.73513	4.89802	-0.546775	-0.51055	-0.59625	0.328438	-1.48027	-0.263472	-0.576262
1.113	-0.17619	-0.123606	-0.795954	5.99588	-0.612776	-0.572216	-0.726036	0.323381	-1.4653	-0.414208	-0.531521
1.114	-0.20752	-0.178751	-0.852774	6.99774	-0.668361	-0.623495	-0.841627	0.31616	-1.42999	-0.558943	-0.48375
1.115	-0.239566	-0.237227	-0.905553	7.83584	-0.712871	-0.663431	-0.9385	0.308062	-1.3783	-0.689821	-0.434998
1.116	-0.272423	-0.297781	-0.954626	8.43693	-0.746491	-0.692087	-1.0138	0.300996	-1.31468	-0.800855	-0.387066
1.117	-0.306199	-0.359382	-1.0007	8.73689	-0.770306	-0.710031	-1.06619	0.295761	-1.24352	-0.887843	-0.341424
1.118	-0.340836	-0.421164	-1.04449	8.70026	-0.786166	-0.717965	-1.0956	0.290572	-1.16867	-0.948439	-0.29907
1.119	-0.376157	-0.482425	-1.08648	8.32813	-0.796173	-0.716737	-1.10321	0.281412	-1.09327	-0.982345	-0.260522
1.12	-0.412095	-0.542666	-1.12719	7.65479	-0.802164	-0.707665	-1.09144	0.263347	-1.01981	-0.991171	-0.226001
1.121	-0.44873	-0.601638	-1.16717	6.73925	-0.805783	-0.692601	-1.06347	0.231778	-0.950147	-0.977782	-0.195451
1.122	-0.486071	-0.659265	-1.2068	5.65646	-0.80864	-0.673449	-1.02283	0.183446	-0.885447	-0.945505	-0.168561
1.123	-0.523936	-0.715586	-1.24613	4.4873	-0.812018	-0.651814	-0.973284	0.117081	-0.826261	-0.89795	-0.145106
1.124	-0.562086	-0.770712	-1.2852	3.30625	-0.81659	-0.629084	-0.918524	0.0335072	-0.772654	-0.839221	-0.12506
1.125	-0.600474	-0.824812	-1.324	2.17292	-0.822492	-0.606453	-0.86183	-0.0645743	-0.724337	-0.773734	-0.108266
1.126	-0.639231	-0.878253	-1.36247	1.13143	-0.829673	-0.584749	-0.805842	-0.172788	-0.680989	-0.705667	-0.0943618
1.127	-0.678373	-0.931524	-1.40045	0.213057	-0.838176	-0.564581	-0.752347	-0.285497	-0.642346	-0.638323	-0.0829298
1.128	-0.717775	-0.985013	-1.43777	-0.562057	-0.848021	-0.546529	-0.702378	-0.396601	-0.607967	-0.573979	-0.0733431
1.129	-0.757352	-1.03891	-1.47422	-1.18449	-0.859058	-0.530866	-0.656509	-0.500404	-0.577195	-0.514234	-0.0647362
1.13	-0.797046	-1.09315	-1.50958	-1.6559	-0.870955	-0.517398	-0.614974	-0.592219	-0.549302	-0.460127	-0.0564388
1.131	-0.836749	-1.14752	-1.5438	-1.98847	-0.883268	-0.505864	-0.577697	-0.668627	-0.523574	-0.412114	-0.0482488
1.132	-0.876297	-1.20171	-1.57706	-2.20207	-0.895734	-0.496198	-0.544435	-0.727567	-0.499392	-0.370273	-0.0402562
1.133	-0.91544	-1.25541	-1.60957	-2.31942	-0.908356	-0.488328	-0.51483	-0.768266	-0.476349	-0.334536	-0.0326122
1.134	-0.953851	-1.30847	-1.64138	-2.36185	-0.920958	-0.482051	-0.488299	-0.791051	-0.454248	-0.304722	-0.0255054
1.135	-0.991278	-1.36077	-1.67242	-2.34823	-0.933059	-0.477109	-0.464128	-0.79717	-0.432907	-0.280286	-0.0192023
1.136	-1.02759	-1.41214	-1.70264	-2.29555	-0.944286	-0.473152	-0.441889	-0.788668	-0.41214	-0.260141	-0.0139304
1.137	-1.06267	-1.4624	-1.73197	-2.21807	-0.954538	-0.469697	-0.4217	-0.768228	-0.391995	-0.243064	-0.00971296
1.138	-1.09642	-1.51135	-1.76026	-2.12681	-0.963845	-0.466221	-0.403819	-0.73894	-0.372816	-0.22814	-0.00642186
1.139	-1.12891	-1.55886	-1.7874	-2.03049	-0.972206	-0.462356	-0.388123	-0.703962	-0.354864	-0.214788	-0.0039921
1.14	-1.16022	-1.60486	-1.81341	-1.93581	-0.979548	-0.458107	-0.37426	-0.666106	-0.337988	-0.20268	-0.00245857
1.141	-1.19047	-1.64933	-1.83833	-1.84737	-0.985866	-0.45371	-0.362059	-0.627567	-0.321847	-0.191597	-0.00176933
1.142	-1.21992	-1.69223	-1.86223	-1.76812	-0.991236	-0.44929	-0.351432	-0.589892	-0.306234	-0.181308	-0.00164754
1.143	-1.24881	-1.73352	-1.88511	-1.70005	-0.995652	-0.444903	-0.342134	-0.554109	-0.291082	-0.171553	-0.00181317
1.144	-1.27726	-1.77324	-1.90693	-1.64419	-0.999019	-0.440804	-0.333945	-0.521042	-0.276409	-0.162044	-0.00242908
1.145	-1.30526	-1.81139	-1.92776	-1.60044	-1.00122	-0.437285	-0.326763	-0.49138	-0.262253	-0.152628	-0.00404232
1.146	-1.33276	-1.84801	-1.9478	-1.56806	-1.00212	-0.434286	-0.320287	-0.465459	-0.248575	-0.14338	-0.00700842
1.147	-1.35977	-1.88322	-1.96724	-1.5461	-1.00154	-0.431465	-0.313989	-0.443206	-0.235388	-0.13461	-0.011066
1.148	-1.38625	-1.9172	-1.98612	-1.53332	-0.999509	-0.428472	-0.307419	-0.424352	-0.223052	-0.126869	-0.015366
1.149	-1.41215	-1.95016	-2.0044	-1.5283	-0.99638	-0.425094	-0.300275	-0.408727	-0.212255	-0.120632	-0.0190214
1.15	-1.43746	-1.98213	-2.02208	-1.52953	-0.992631	-0.421296	-0.29239	-0.396119	-0.203497	-0.115948	-0.0216879
1.151	-1.46215	-2.01303	-2.03911	-1.53536	-0.988708	-0.41705	-0.283858	-0.385946	-0.196661	-0.112586	-0.0235382
1.152	-1.48612	-2.04267	-2.05529	-1.5439	-0.985045	-0.412285	-0.274942	-0.377543	-0.191434	-0.11042	-0.0249085
1.153	-1.50925	-2.07094	-2.07031	-1.55309	-0.981974	-0.407137	-0.26578	-0.370437	-0.187951	-0.109605	-0.026136
1.154	-1.53162	-2.09787	-2.08407	-1.56113	-0.979517	-0.402021	-0.256213	-0.364107	-0.186717	-0.110342	-0.0276569
1.155	-1.55338	-2.12358	-2.09673	-1.56698	-0.977373	-0.397356	-0.24598	-0.357977	-0.188152	-0.112566	-0.0300493
1.156	-1.57458	-2.14826	-2.1086	-1.57043	-0.975166	-0.393249	-0.235134	-0.351669	-0.192317	-0.115884	-0.0336326
1.157	-1.59503	-2.17214	-2.11991	-1.57187	-0.972645	-0.389469	-0.224012	-0.345044	-0.198815	-0.119706	-0.0381557
1.158	-1.61455	-2.19534	-2.13069	-1.57213	-0.96972	-0.385809	-0.212895	-0.338189	-0.206842	-0.123497	-0.0430912
1.159	-1.63317	-2.21786	-2.14093	-1.57222	-0.966441	-0.382415	-0.202043	-0.331293	-0.21547	-0.126928	-0.0479587
1.16	-1.65101	-2.23965	-2.15063	-1.57299	-0.962907	-0.379538	-0.191813	-0.324422	-0.223815	-0.129749	-0.0524435
1.161	-1.66807	-2.2605	-2.15969	-1.57497	-0.959124	-0.37714	-0.18253	-0.317585	-0.230904	-0.13163	-0.0564103
1.162	-1.6842	-2.28025	-2.16786	-1.57843	-0.954939	-0.375036	-0.174533	-0.310914	-0.235791	-0.132374	-0.0598281
1.163	-1.69939	-2.29882	-2.17492	-1.58348	-0.950104	-0.373172	-0.168309	-0.304568	-0.23798	-0.132227	-0.0627894
1.164	-1.71374	-2.316	-2.18079	-1.59	-0.944464	-0.371556	-0.164222	-0.298573	-0.237547	-0.131739	-0.0654435
1.165	-1.72733	-2.33157	-2.18537	-1.59801	-0.93804	-0.370111	-0.162062	-0.292826	-0.234888	-0.131342	-0.0677424
1.166	-1.74016	-2.34555	-2.18852	-1.60813	-0.931084	-0.36876	-0.161097	-0.287238	-0.230473	-0.13122	-0.0693933
1.167	-1.75226	-2.35827	-2.19027	-1.62124	-0.924031	-0.367468	-0.160549	-0.281842	-0.224828	-0.131449	-0.0701416
1.168	-1.76374	-2.37003	-2.19083	-1.63749	-0.917113	-0.366066	-0.159978	-0.276718	-0.218448	-0.131917	-0.0699821
1.169	-1.77464	-2.38095	-2.19047	-1.65599	-0.910343	-0.364222	-0.159514	-0.271796	-0.211474	-0.132341	-0.0690121
1.17	-1.78485	-2.39107	-2.18943	-1.67514	-0.903871	-0.361698	-0.159614	-0.266829	-0.203817	-0.132503	-0.0672011
1.171	-1.79435	-2.40054	-2.1879	-1.69308	-0.89795	-0.358452	-0.160449	-0.261572	-0.19554	-0.132226	-0.0643744
1.172	-1.80317	-2.40954	-2.18604	-1.70814	-0.892707	-0.354547	-0.161708	-0.255832	-0.186751	-0.131246	-0.0603792
1.173	-1.81136	-2.41803	-2.18383	-1.71927	-0.88806	-0.350012	-0.162826	-0.249345	-0.177459	-0.129178	-0.055259
1.174	-1.81899	-2.42579	-2.18112	-1.72626	-0.883733	-0.344844	-0.163328	-0.241796	-0.167649	-0.125649	-0.049285
1.175	-1.8262	-2.43271	-2.17788	-1.72951	-0.879445	-0.339008	-0.163064	-0.233132	-0.157243	-0.120556	-0.042918
1.176	-1.83312	-2.43885	-2.17422	-1.72969	-0.875023	-0.332411	-0.16209	-0.223724	-0.14627	-0.114113	-0.0366664
1.177	-1.83979	-2.4443	-2.17024	-1.72753	-0.870254	-0.325288	-0.160473	-0.2141	-0.135177	-0.106781	-0.0308157
1.178	-1.84623	-2.44899	-2.16596	-1.72378	-0.86487	-0.318246	-0.158079	-0.204752	-0.124637	-0.0991639	-0.0255071
1.179	-1.85255	-2.45278	-2.1613	-1.71918	-0.858617	-0.311584	-0.154542	-0.196158	-0.115053	-0.0918251	-0.0210542
1.18	-1.85884	-2.45567	-2.15629	-1.71433	-0.851239	-0.305108	-0.149665	-0.188655	-0.106546	-0.08513	-0.017785
1.181	-1.86514	-2.45782	-2.15113	-1.70983	-0.842601	-0.298611	-0.143674	-0.182291	-0.0991695	-0.0792936	-0.0158126
1.182	-1.8713	-2.45934	-2.14607	-1.70619	-0.832875	-0.292147	-0.136954	-0.17693	-0.0927978	-0.0746272	-0.0152121
1.183	-1.87717	-2.46021	-2.14118	-1.70376	-0.82259	-0.285816	-0.129775	-0.172593	-0.0871008	-0.0716676	-0.0160666
1.184	-1.88266	-2.46048	-2.13647	-1.70304	-0.812426	-0.279517	-0.122446	-0.169585	-0.0819141	-0.0708751	-0.0183963
1.185	-1.88773	-2.46032	-2.13185	-1.70469	-0.802905	-0.273259	-0.115492	-0.16814	-0.0774935	-0.0722837	-0.0221954
1.186	-1.89231	-2.45988	-2.12717	-1.7091	-0.794245	-0.267583	-0.109359	-0.168062	-0.0741477	-0.0756041	-0.0272782
1.187	-1.89643	-2.45917	-2.12236	-1.71632	-0.786421	-0.263167	-0.104188	-0.168849	-0.0717966	-0.0803774	-0.0331476
1.188	-1.90005	-2.4581	-2.11759	-1.72592	-0.779383	-0.260164	-0.0999033	-0.17	-0.0700484	-0.0860122	-0.0391386
1.189	-1.90305	-2.45657	-2.11308	-1.73723	-0.773297	-0.258206	-0.0964228	-0.171052	-0.0686502	-0.0919582	-0.0445978
1.19	-1.90538	-2.45456	-2.10897	-1.74996	-0.768445	-0.256913	-0.0938373	-0.171446	-0.0677222	-0.0977021	-0.0490564
1.191	-1.90702	-2.45214	-2.10521	-1.76422	-0.764843	-0.256075	-0.0923598	-0.170667	-0.0674674	-0.102662	-0.052396
1.192	-1.90809	-2.44939	-2.1016	-1.77996	-0.7622	-0.25553	-0.0920623	-0.168694	-0.0678131	-0.1064	-0.0547821
1.193	-1.90879	-2.44624	-2.09772	-1.79708	-0.760251	-0.255134	-0.0927386	-0.166062	-0.0684542	-0.108807	-0.0562912
1.194	-1.90934	-2.44269	-2.09324	-1.81606	-0.758902	-0.25481	-0.0939697	-0.163288	-0.0691222	-0.109958	-0.0566814
1.195	-1.90993	-2.43885	-2.08793	-1.83776	-0.758076	-0.254551	-0.0952336	-0.160466	-0.0696514	-0.109985	-0.0557003
1.196	-1.91065	-2.43474	-2.08171	-1.86179	-0.757524	-0.254236	-0.0961153	-0.157462	-0.069912	-0.109038	-0.0534726
1.197	-1.91135	-2.43035	-2.0746	-1.88594	-0.756823	-0.253519	-0.0964734	-0.15422	-0.0698023	-0.107292	-0.0504394
1.198	-1.91182	-2.4257	-2.06681	-1.90762	-0.755641	-0.252208	-0.0963167	-0.150825	-0.069199	-0.105095	-0.0470257
1.199	-1.912	-2.42081	-2.05859	-1.92505	-0.753847	-0.25067	-0.0956642	-0.147352	-0.0679617	-0.102909	-0.0434806
1.2	-1.91187	-2.41575	-2.05013	-1.93695	-0.751402	-0.249539	-0.0945375	-0.143709	-0.065975	-0.100928	-0.0400184
1.201	-1.91152	-2.41054	-2.04154	-1.94199	-0.748291	-0.24919	-0.0929424	-0.139782	-0.0630955	-0.099123	-0.0369364
1.202	-1.91119	-2.40524	-2.03299	-1.93904	-0.744475	-0.249645	-0.0909117	-0.135755	-0.0592088	-0.0976021	-0.0344465
1.203	-1.91095	-2.39986	-2.02466	-1.92749	-0.739862	-0.250689	-0.0886132	-0.132019	-0.0543803	-0.096456	-0.0325173
1.204	-1.91068	-2.39438	-2.01668	-1.90753	-0.734568	-0.252041	-0.086303	-0.128853	-0.0489575	-0.0955762	-0.0309833
1.205	-1.91033	-2.38874	-2.00907	-1.88023	-0.729117	-0.253549	-0.0841688	-0.12629	-0.0434789	-0.0947823	-0.029672
1.206	-1.90985	-2.38285	-2.00177	-1.84739	-0.724053	-0.255099	-0.0823067	-0.124066	-0.0383727	-0.0937858	-0.0284775
1.207	-1.9092	-2.37655	-1.99466	-1.81115	-0.719534	-0.256469	-0.0807374	-0.12177	-0.0337691	-0.0921772	-0.0273775
1.208	-1.90836	-2.3698	-1.98765	-1.77363	-0.715466	-0.257428	-0.0793434	-0.119145	-0.0294993	-0.0897292	-0.0263247
1.209	-1.90741	-2.36259	-1.98066	-1.7366	-0.711681	-0.257771	-0.0779525	-0.116078	-0.0253281	-0.0866089	-0.0252495
1.21	-1.90648	-2.35503	-1.97359	-1.70141	-0.707995	-0.257297	-0.0764904	-0.112473	-0.0212064	-0.0832232	-0.02415
1.211	-1.90564	-2.34737	-1.96639	-1.66914	-0.704234	-0.255878	-0.0748353	-0.10835	-0.0171674	-0.0799436	-0.0229581
1.212	-1.90478	-2.33979	-1.95909	-1.64059	-0.700235	-0.253417	-0.0727654	-0.103897	-0.01316	-0.0769702	-0.0214892
1.213	-1.90382	-2.33236	-1.95176	-1.61605	-0.695871	-0.249864	-0.0702703	-0.0993267	-0.009109	-0.074408	-0.0196317
1.214	-1.90261	-2.32508	-1.94436	-1.5955	-0.691023	-0.245444	-0.0675223	-0.0948281	-0.00510364	-0.0723274	-0.0173404
1.215	-1.90107	-2.318	-1.93684	-1.57873	-0.685602	-0.240604	-0.0646407	-0.090599	-0.00145913	-0.0707128	-0.0147027
1.216	-1.89928	-2.31118	-1.92923	-1.5655	-0.679672	-0.235731	-0.0617924	-0.0868288	0.00145484	-0.0695854	-0.012187
1.217	-1.89733	-2.30449	-1.9215	-1.5555	-0.673428	-0.231175	-0.0591129	-0.0836547	0.00335801	-0.0691463	-0.0104647
1.218	-1.89524	-2.29768	-1.91366	-1.54835	-0.667131	-0.227285	-0.0565401	-0.0811728	0.00414539	-0.0696079	-0.0099218
1.219	-1.89296	-2.29064	-1.90586	-1.54348	-0.661137	-0.224283	-0.0540088	-0.0794462	0.00385266	-0.0709328	-0.010444
1.22	-1.89044	-2.28333	-1.89834	-1.54028	-0.655854	-0.222376	-0.0515668	-0.078469	0.00234473	-0.0728247	-0.0116078
1.221	-1.88777	-2.27577	-1.89126	-1.53797	-0.651642	-0.221907	-0.0493581	-0.0780858	-0.000713052	-0.0749466	-0.0129713
1.222	-1.88514	-2.26801	-1.88455	-1.53582	-0.648673	-0.223059	-0.0476341	-0.0779508	-0.00541829	-0.076991	-0.0142148
1.223	-1.88269	-2.26009	-1.87805	-1.53333	-0.646824	-0.22548	-0.046625	-0.0777277	-0.0114142	-0.0786614	-0.0151851
1.224	-1.88038	-2.252	-1.87164	-1.53041	-0.645868	-0.228501	-0.0463877	-0.0773396	-0.0180947	-0.0798632	-0.0158668
1.225	-1.87807	-2.2438	-1.86523	-1.52712	-0.645731	-0.231579	-0.0468356	-0.0769025	-0.0249342	-0.0807737	-0.0162526
1.226	-1.87566	-2.23561	-1.85878	-1.52354	-0.646385	-0.234503	-0.0478751	-0.0765057	-0.0316542	-0.0815679	-0.0163067
1.227	-1.8732	-2.22769	-1.85221	-1.51984	-0.647603	-0.237278	-0.0493379	-0.0761859	-0.0381255	-0.082207	-0.016061
1.228	-1.87077	-2.22022	-1.8455	-1.51624	-0.648947	-0.239754	-0.0508809	-0.0760482	-0.0441332	-0.0825693	-0.0156007
1.229	-1.86846	-2.21311	-1.83868	-1.51278	-0.649999	-0.241577	-0.0521939	-0.0762637	-0.0492721	-0.0826709	-0.01514
1.23	-1.86617	-2.20612	-1.83175	-1.50941	-0.65054	-0.242547	-0.0530901	-0.0768821	-0.0531622	-0.0826711	-0.0151063
1.231	-1.86358	-2.19908	-1.82475	-1.50599	-0.650585	-0.242845	-0.0534613	-0.0776912	-0.0556755	-0.0827717	-0.0158807
1.232	-1.86045	-2.19194	-1.8178	-1.50235	-0.650255	-0.242843	-0.0534228	-0.0784303	-0.0569121	-0.0831344	-0.0175687
1.233	-1.85688	-2.18464	-1.81102	-1.49842	-0.649539	-0.242831	-0.0531623	-0.0791855	-0.0571128	-0.0838422	-0.0200049
1.234	-1.85316	-2.17715	-1.80439	-1.49454	-0.64836	-0.243028	-0.0526494	-0.0803265	-0.056659	-0.0849869	-0.0228962
1.235	-1.84951	-2.1696	-1.79788	-1.491	-0.646856	-0.243732	-0.051888	-0.0820527	-0.0560368	-0.0868016	-0.0260024
1.236	-1.84593	-2.16214	-1.7915	-1.48758	-0.645314	-0.24522	-0.0511049	-0.0841924	-0.0556086	-0.0895659	-0.029128
1.237	-1.84238	-2.15483	-1.78525	-1.48374	-0.643912	-0.247649	-0.0506708	-0.0863275	-0.055407	-0.093362	-0.0320532
1.238	-1.83881	-2.1477	-1.77906	-1.47902	-0.642663	-0.251052	-0.0511076	-0.0879909	-0.0552608	-0.0979105	-0.0346462
1.239	-1.8352	-2.14079	-1.77285	-1.47323	-0.641429	-0.255211	-0.0528206	-0.0888521	-0.0550493	-0.102568	-0.0369951
1.24	-1.83159	-2.13409	-1.76664	-1.46632	-0.640033	-0.259654	-0.0558982	-0.0888271	-0.0548178	-0.106659	-0.0392505
1.241	-1.82809	-2.12751	-1.76059	-1.45838	-0.638532	-0.263948	-0.0601657	-0.0879615	-0.0546612	-0.109805	-0.0414421
1.242	-1.82479	-2.12096	-1.75479	-1.44954	-0.637141	-0.267788	-0.065134	-0.0863356	-0.054487	-0.111882	-0.0435765
1.243	-1.82167	-2.11431	-1.74918	-1.44005	-0.635941	-0.270955	-0.0701192	-0.0843022	-0.054149	-0.112821	-0.0457151
1.244	-1.81865	-2.10756	-1.74363	-1.43023	-0.634695	-0.273391	-0.0744881	-0.0825903	-0.0537618	-0.112519	-0.0478627
1.245	-1.81556	-2.1007	-1.73802	-1.42038	-0.632897	-0.275202	-0.0778117	-0.0819313	-0.0535533	-0.110901	-0.0498342
1.246	-1.81225	-2.09362	-1.73228	-1.41079	-0.63013	-0.276506	-0.0799108	-0.0827538	-0.0535481	-0.107995	-0.0514021
1.247	-1.80872	-2.08627	-1.72636	-1.40176	-0.626316	-0.277315	-0.0807253	-0.0851926	-0.0536912	-0.104134	-0.0525371
1.248	-1.80498	-2.07867	-1.72022	-1.39345	-0.621694	-0.277602	-0.080156	-0.0891227	-0.0540298	-0.100033	-0.053385
1.249	-1.80099	-2.07085	-1.71386	-1.38601	-0.616715	-0.277421	-0.0780468	-0.0942923	-0.0544811	-0.0963319	-0.0542123
1.25	-1.79672	-2.06277	-1.70724	-1.37948	-0.61186	-0.276914	-0.0742835	-0.100425	-0.0548091	-0.0933088	-0.0552366
1.251	-1.7921	-2.05442	-1.7003	-1.37346	-0.607558	-0.276218	-0.0688274	-0.107097	-0.0549895	-0.0911982	-0.0563941
1.252	-1.78715	-2.04589	-1.69298	-1.36721	-0.604163	-0.275343	-0.0617762	-0.113705	-0.0552615	-0.0902462	-0.0575693
1.253	-1.78198	-2.03731	-1.68534	-1.36019	-0.601848	-0.274217	-0.0535236	-0.119572	-0.0558113	-0.090435	-0.0589627
1.254	-1.77685	-2.02879	-1.67764	-1.35218	-0.600514	-0.272862	-0.0446803	-0.124078	-0.0565952	-0.0914642	-0.060922
1.255	-1.77205	-2.02039	-1.67021	-1.3432	-0.599827	-0.271433	-0.0359261	-0.126838	-0.0574594	-0.092911	-0.0634478
1.256	-1.76771	-2.01217	-1.66324	-1.33343	-0.599474	-0.270159	-0.0280166	-0.1278	-0.0582059	-0.0943721	-0.0661174
1.257	-1.76371	-2.00417	-1.65685	-1.32309	-0.599356	-0.269226	-0.0217706	-0.127179	-0.0584734	-0.0955899	-0.0684402
1.258	-1.75986	-1.99645	-1.65103	-1.31243	-0.599368	-0.268645	-0.0180612	-0.125269	-0.0578621	-0.0964464	-0.070026
1.259	-1.75598	-1.98911	-1.64564	-1.30166	-0.59926	-0.268408	-0.017636	-0.122285	-0.0563546	-0.0969226	-0.0706338
1.26	-1.7519	-1.98213	-1.64053	-1.29101	-0.598844	-0.268524	-0.0207074	-0.118501	-0.0543966	-0.0970818	-0.0702421
1.261	-1.74755	-1.97551	-1.63546	-1.28068	-0.598048	-0.268781	-0.0267167	-0.11434	-0.0524236	-0.0968675	-0.0688652
1.262	-1.74304	-1.96929	-1.63017	-1.27075	-0.596824	-0.268821	-0.0345765	-0.110184	-0.0505453	-0.0961055	-0.0664389
1.263	-1.73845	-1.96334	-1.62447	-1.26121	-0.595115	-0.268434	-0.0432099	-0.106311	-0.0487363	-0.0948427	-0.063042
1.264	-1.73376	-1.95736	-1.61835	-1.25211	-0.592863	-0.267665	-0.051821	-0.102923	-0.0470046	-0.0933928	-0.058974
1.265	-1.72893	-1.95102	-1.6119	-1.24362	-0.590037	-0.266631	-0.0598707	-0.10013	-0.0454508	-0.0920333	-0.0545495
1.266	-1.7239	-1.94404	-1.6051	-1.23596	-0.586644	-0.265299	-0.0669945	-0.0980099	-0.0443361	-0.0908091	-0.0499794
1.267	-1.71867	-1.93647	-1.59791	-1.22931	-0.582808	-0.263571	-0.0728472	-0.0965863	-0.0438399	-0.0896512	-0.0454314
1.268	-1.71331	-1.9287	-1.59044	-1.22376	-0.578834	-0.261421	-0.0771112	-0.0956974	-0.0437273	-0.0885369	-0.0411636
1.269	-1.70792	-1.92104	-1.5829	-1.21928	-0.574989	-0.258913	-0.0797029	-0.0950063	-0.0435918	-0.0874704	-0.0376072
1.27	-1.70257	-1.91351	-1.57542	-1.21566	-0.571449	-0.25628	-0.0808801	-0.0941825	-0.0433303	-0.086583	-0.0351885
1.271	-1.69726	-1.906	-1.5681	-1.21259	-0.568398	-0.253948	-0.0810724	-0.0930024	-0.0431251	-0.0862069	-0.0340484
1.272	-1.69218	-1.89845	-1.56102	-1.20985	-0.566032	-0.252321	-0.0806145	-0.0913375	-0.0431701	-0.0865989	-0.0340455
1.273	-1.68759	-1.8909	-1.55417	-1.20737	-0.564562	-0.25152	-0.0796683	-0.0892713	-0.0435854	-0.087783	-0.0348703
1.274	-1.68353	-1.88351	-1.54753	-1.20527	-0.56402	-0.251385	-0.0783562	-0.0870833	-0.0444566	-0.0896008	-0.0360576
1.275	-1.67977	-1.87646	-1.54117	-1.20367	-0.564112	-0.251673	-0.0769446	-0.08493	-0.0457549	-0.0917556	-0.0371208
1.276	-1.67611	-1.86976	-1.53526	-1.20256	-0.564446	-0.252163	-0.0758284	-0.0827888	-0.0473331	-0.0939313	-0.0377196
1.277	-1.67239	-1.86318	-1.52984	-1.20186	-0.564681	-0.252723	-0.0752996	-0.0807695	-0.049068	-0.0957774	-0.0378542
1.278	-1.66848	-1.85651	-1.52481	-1.20153	-0.564537	-0.253322	-0.0753656	-0.0792598	-0.0507626	-0.0968577	-0.038201
1.279	-1.66437	-1.84967	-1.52007	-1.20144	-0.563828	-0.25399	-0.0757417	-0.0786799	-0.0520198	-0.0969705	-0.0400098
1.28	-1.66017	-1.84268	-1.51546	-1.20152	-0.562371	-0.254791	-0.075997	-0.0792115	-0.052503	-0.096439	-0.0442754
1.281	-1.65586	-1.83566	-1.5108	-1.20185	-0.560026	-0.255719	-0.0757946	-0.0807891	-0.0522112	-0.0958776	-0.0511559
1.282	-1.65137	-1.82874	-1.50597	-1.2026	-0.557001	-0.25664	-0.0749957	-0.0832226	-0.0512919	-0.0957522	-0.0602384
1.283	-1.64674	-1.82205	-1.50097	-1.20386	-0.553787	-0.257325	-0.0736252	-0.0862869	-0.0498521	-0.0960775	-0.070899
1.284	-1.6421	-1.81562	-1.49586	-1.20578	-0.550789	-0.257632	-0.071835	-0.0896988	-0.048067	-0.096557	-0.0824086
1.285	-1.63753	-1.80937	-1.49072	-1.20842	-0.548244	-0.257678	-0.0697817	-0.0930451	-0.0461362	-0.0971225	-0.0939391
1.286	-1.63313	-1.80307	-1.48559	-1.21162	-0.546321	-0.257762	-0.0675948	-0.0958119	-0.0442339	-0.0980382	-0.104591
1.287	-1.62891	-1.79657	-1.48058	-1.21496	-0.545133	-0.258086	-0.0653528	-0.0975405	-0.0426815	-0.0994462	-0.113599
1.288	-1.62479	-1.78989	-1.47583	-1.2179	-0.544713	-0.258628	-0.0629981	-0.0980532	-0.0418751	-0.101187	-0.120443
1.289	-1.62071	-1.78321	-1.47142	-1.21992	-0.544959	-0.259337	-0.0605552	-0.0975075	-0.0419177	-0.103056	-0.124886
1.29	-1.61665	-1.77663	-1.46724	-1.22088	-0.545626	-0.260278	-0.0583714	-0.0960869	-0.0425752	-0.10493	-0.127176
1.291	-1.61258	-1.77003	-1.46318	-1.22083	-0.546358	-0.261443	-0.0569943	-0.0938257	-0.0435178	-0.106697	-0.128015
1.292	-1.60848	-1.76331	-1.45908	-1.21987	-0.546698	-0.262622	-0.0568267	-0.0908343	-0.0444027	-0.108281	-0.128126
1.293	-1.60443	-1.75655	-1.45485	-1.21812	-0.546271	-0.263534	-0.0578832	-0.0875015	-0.0449719	-0.109615	-0.127935
1.294	-1.60042	-1.75004	-1.45041	-1.21572	-0.54504	-0.264005	-0.0599008	-0.0844381	-0.0452063	-0.110677	-0.127603
1.295	-1.59643	-1.74407	-1.44575	-1.21264	-0.543287	-0.264093	-0.0625485	-0.0821737	-0.0453161	-0.111624	-0.12706
1.296	-1.5923	-1.73867	-1.44091	-1.20885	-0.541349	-0.263997	-0.0654707	-0.0808683	-0.0455346	-0.112773	-0.126049
1.297	-1.58771	-1.73371	-1.43591	-1.20429	-0.539337	-0.263835	-0.0683438	-0.0803383	-0.0459441	-0.114395	-0.124377
1.298	-1.58246	-1.72904	-1.43072	-1.19881	-0.537168	-0.263678	-0.0710243	-0.0804159	-0.0465937	-0.116558	-0.122158
1.299	-1.57663	-1.72447	-1.42541	-1.19227	-0.534928	-0.263695	-0.0735768	-0.0811387	-0.0475802	-0.11912	-0.119706
1.3	-1.57042	-1.71985	-1.42017	-1.18463	-0.533024	-0.264063	-0.0760602	-0.0824448	-0.0489645	-0.121807	-0.11724
1.301	-1.56401	-1.71514	-1.41518	-1.17587	-0.531932	-0.264849	-0.0782843	-0.0840709	-0.0507411	-0.124265	-0.114832
1.302	-1.55754	-1.71038	-1.41052	-1.16603	-0.531749	-0.265993	-0.0799647	-0.0858105	-0.0527356	-0.126117	-0.112565
1.303	-1.55112	-1.70563	-1.40606	-1.15522	-0.532149	-0.267465	-0.0810956	-0.0875242	-0.0546615	-0.127172	-0.11062
1.304	-1.54492	-1.70094	-1.4017	-1.14369	-0.532761	-0.269523	-0.0818802	-0.0890424	-0.0563935	-0.127466	-0.109187
1.305	-1.53907	-1.69637	-1.39735	-1.13175	-0.533464	-0.272489	-0.0824738	-0.0903251	-0.0579508	-0.12703	-0.108247
1.306	-1.53365	-1.69194	-1.39291	-1.11974	-0.53432	-0.276187	-0.0829635	-0.0914933	-0.0593124	-0.125914	-0.107527
1.307	-1.5288	-1.6876	-1.38835	-1.10783	-0.535252	-0.280037	-0.0834278	-0.0925443	-0.0604548	-0.124337	-0.106735
1.308	-1.52471	-1.68327	-1.38377	-1.09597	-0.535961	-0.283576	-0.0840083	-0.093232	-0.0614091	-0.122558	-0.105664
1.309	-1.52134	-1.67878	-1.3793	-1.0841	-0.536239	-0.286577	-0.0848398	-0.0932441	-0.0621838	-0.120735	-0.104066
1.31	-1.51842	-1.67399	-1.37489	-1.07232	-0.536042	-0.288821	-0.0859373	-0.0924315	-0.0628194	-0.118949	-0.101674
1.311	-1.51561	-1.66877	-1.37037	-1.06083	-0.535301	-0.290056	-0.0873396	-0.0909113	-0.0634854	-0.117328	-0.0984341
1.312	-1.5126	-1.66309	-1.36572	-1.04987	-0.533965	-0.290127	-0.0892006	-0.0890094	-0.0643374	-0.116077	-0.0946548
1.313	-1.50919	-1.65703	-1.36104	-1.03958	-0.53208	-0.289041	-0.0915083	-0.0870943	-0.0652472	-0.115338	-0.0908269
1.314	-1.50537	-1.6507	-1.35646	-1.02998	-0.529712	-0.286992	-0.0939063	-0.0854158	-0.065826	-0.11506	-0.0873437
1.315	-1.50125	-1.64436	-1.3519	-1.02103	-0.526987	-0.28438	-0.0960006	-0.0841359	-0.0658428	-0.115043	-0.0845262
1.316	-1.49694	-1.63833	-1.3472	-1.01275	-0.524173	-0.281592	-0.0975776	-0.0834017	-0.0654271	-0.115141	-0.0827056
1.317	-1.49252	-1.63272	-1.34218	-1.00529	-0.521581	-0.278639	-0.0984977	-0.0832608	-0.0648231	-0.115248	-0.0820285
1.318	-1.48808	-1.62746	-1.33676	-0.998776	-0.519478	-0.275307	-0.0986469	-0.083647	-0.0641778	-0.115252	-0.0822537
1.319	-1.48374	-1.62249	-1.331	-0.993131	-0.518154	-0.271712	-0.098002	-0.0844155	-0.0636046	-0.11526	-0.0829377
1.32	-1.47957	-1.61774	-1.32514	-0.988155	-0.517722	-0.268366	-0.0967394	-0.0853018	-0.0632859	-0.115516	-0.0838516
1.321	-1.47562	-1.61302	-1.31941	-0.98368	-0.517856	-0.265745	-0.0952351	-0.0860218	-0.0634096	-0.115962	-0.0848881
1.322	-1.47198	-1.60812	-1.31403	-0.979679	-0.518119	-0.264068	-0.0939155	-0.0863891	-0.0640651	-0.116377	-0.0857944
1.323	-1.46877	-1.60305	-1.30916	-0.976204	-0.518323	-0.263355	-0.0930648	-0.0863144	-0.0651835	-0.116716	-0.0864508
1.324	-1.46607	-1.5979	-1.30476	-0.973299	-0.518413	-0.263505	-0.0927908	-0.0858482	-0.0665142	-0.116959	-0.0870192
1.325	-1.46381	-1.59268	-1.3008	-0.970963	-0.518326	-0.264244	-0.0931828	-0.0851659	-0.0677686	-0.117042	-0.087717
1.326	-1.46186	-1.58739	-1.29736	-0.969148	-0.517961	-0.265205	-0.0942043	-0.0844206	-0.0688516	-0.117058	-0.0886893
1.327	-1.46007	-1.58213	-1.29442	-0.967803	-0.517129	-0.266258	-0.0955463	-0.0836973	-0.0698843	-0.117169	-0.089935
1.328	-1.45824	-1.577	-1.29178	-0.966814	-0.515638	-0.267464	-0.0968963	-0.0830883	-0.0710174	-0.117397	-0.0913143
1.329	-1.4562	-1.57194	-1.2893	-0.966021	-0.513378	-0.268724	-0.0980668	-0.0826414	-0.0722542	-0.117704	-0.0926766
1.33	-1.45385	-1.5668	-1.28693	-0.965501	-0.510286	-0.269678	-0.0988885	-0.0824556	-0.0734135	-0.11803	-0.0939202
1.331	-1.45125	-1.56163	-1.28463	-0.965514	-0.506443	-0.269951	-0.0992919	-0.0829697	-0.0743199	-0.11838	-0.0949816
1.332	-1.44849	-1.55658	-1.28226	-0.966173	-0.502171	-0.269518	-0.0993167	-0.0846433	-0.0750111	-0.118974	-0.0958381
1.333	-1.44552	-1.55165	-1.27977	-0.967438	-0.497901	-0.268773	-0.0989237	-0.0873634	-0.0756458	-0.120002	-0.0964781
1.334	-1.44225	-1.54674	-1.27728	-0.96919	-0.494032	-0.268118	-0.0980023	-0.0905667	-0.0763233	-0.12139	-0.0969799
1.335	-1.43875	-1.54179	-1.27497	-0.971218	-0.490966	-0.267649	-0.0966196	-0.0936811	-0.0770567	-0.123028	-0.0976541
1.336	-1.435	-1.5369	-1.27291	-0.973328	-0.489007	-0.267368	-0.0950605	-0.0963198	-0.0778358	-0.124978	-0.0988268
1.337	-1.431	-1.5322	-1.27094	-0.975391	-0.488097	-0.267417	-0.0936104	-0.0983503	-0.078653	-0.127276	-0.10047
[truncated: 1,662 more rows]

## Sheet: Q116R_K_S2_N1
	100	30	10	3	1	0.3	0.1	0.03	0.01	0
[truncated: 3,000 more rows]

## Sheet: Q116R_K_S2_N2
First_Column	Q116R_2281_AHR22_300K-S4-0030.asc	Q116R_2281_AHR22_300K-S4-0032.asc	Q116R_2281_AHR22_300K-S4-0034.asc	Q116R_2281_AHR22_300K-S4-0036.asc	Q116R_2281_AHR22_300K-S4-0038.asc	Q116R_2281_AHR22_300K-S4-0040.asc	Q116R_2281_AHR22_300K-S4-0042.asc	Q116R_2281_AHR22_300K-S4-0044.asc	Q116R_2281_AHR22_300K-S4-0046.asc	Q116R_2281_AHR22_300K-S4-0048.asc
[truncated: 3,000 more rows]

[truncated: 10 more sheets: Q116R_Rb_S1_N1, Q116R_Rb_S1_N2, Q116R_NH4_S1_N1, Q116R_NH4_S1_N2, Q116R_NH4_S2_N1, Q116R_NH4_S2_N2, Q116R_Na_S1_N1, Q116R_Na_S1_N2, Q116R_Na_S2_N1, Q116R_Na_S2_N2]
