# Supplementary material for: Conduction pathway for potassium through the Escherichia coli pump KdpFABC
Source: eLife. 2025 Nov 19;14:RP107397. doi: 10.7554/eLife.107397 (PMC12629597; doi:10.7554/eLife.107397)
Supplement: Figure 2—figure supplement 4—source data 1. — Each tab in the file contains data for one panel with the ion concentration indicated in the first row in mM and the time listed in the first column in seconds. [file elife-107397-fig2-figsupp4-data1.xlsx]

## Sheet: G232D_K_S2_N1
	100	30	10	3	1	0.3	0.1	0.03	0.01	0.003
0	-0.00015875	-0.000121828	-5.17e-05	-7.01e-05	-0.000103367	-5.91e-05	7.76e-05	0.000118164	1.85e-05	7.76e-05
0.001	-0.000982348	-0.000791311	-0.000336774	-0.000483983	-0.000625641	-0.000346921	0.00039093	0.000646115	1.07e-05	0.000520156
0.002	-0.00300423	-0.00253331	-0.00106157	-0.00164127	-0.0019467	-0.00101603	0.000752738	0.00147221	-0.000102474	0.00156905
0.003	-0.00635889	-0.00555659	-0.00232987	-0.00376056	-0.00436296	-0.00207688	0.00039115	0.00178357	5.99e-05	0.00285889
0.004	-0.0108863	-0.00970725	-0.00426778	-0.00671285	-0.00799094	-0.00340228	-0.00137152	0.00116188	0.00122809	0.00361229
0.005	-0.0163342	-0.0146552	-0.0070509	-0.0100642	-0.0125861	-0.00479171	-0.00447412	0.000207777	0.00350256	0.00349631
0.006	-0.0223698	-0.0200248	-0.0106791	-0.0132122	-0.0176042	-0.00609761	-0.00832144	-0.000625757	0.00636196	0.00268998
0.007	-0.0286079	-0.0254533	-0.0147992	-0.0156171	-0.0224642	-0.00721509	-0.012241	-0.00184414	0.00952035	0.00121202
0.008	-0.0346899	-0.0306692	-0.0187994	-0.0170807	-0.0267803	-0.00803613	-0.0157043	-0.00394262	0.0129742	-0.00105759
0.009	-0.0402795	-0.0355799	-0.0222442	-0.0179226	-0.0304533	-0.00852786	-0.018367	-0.00656328	0.0164024	-0.00374646
0.01	-0.0450013	-0.0401666	-0.0251185	-0.0187907	-0.0336094	-0.00867257	-0.0201216	-0.009307	0.0190558	-0.00620897
0.011	-0.0485193	-0.0443606	-0.0274689	-0.0202127	-0.0364597	-0.00838608	-0.0210996	-0.0123243	0.0204423	-0.00845534
0.012	-0.0506652	-0.0480992	-0.0291035	-0.0223103	-0.0390954	-0.0076847	-0.0214089	-0.015496	0.0207081	-0.011092
0.013	-0.0515141	-0.0513608	-0.0297649	-0.024905	-0.0413927	-0.0068265	-0.0210198	-0.0181551	0.0200426	-0.0143169
0.014	-0.0514163	-0.0541522	-0.0293543	-0.0278781	-0.0430932	-0.00622246	-0.0201306	-0.0200239	0.0183812	-0.0177304
0.015	-0.050843	-0.0564939	-0.0279029	-0.031257	-0.0439936	-0.00624451	-0.0192818	-0.0214613	0.0159435	-0.0211852
0.016	-0.0501373	-0.0583924	-0.0254096	-0.0349489	-0.0440579	-0.00703148	-0.0189156	-0.0225204	0.013362	-0.0250157
0.017	-0.0495046	-0.0598592	-0.0218501	-0.0386698	-0.0433742	-0.00851007	-0.019122	-0.0227685	0.011115	-0.0292715
0.018	-0.0491884	-0.0609247	-0.0173937	-0.0422447	-0.0421434	-0.0105027	-0.0197193	-0.0223155	0.009217	-0.0334648
0.019	-0.0493531	-0.0616382	-0.0124728	-0.0457721	-0.0406703	-0.0126627	-0.0203967	-0.0219743	0.00743607	-0.0371438
0.02	-0.0498957	-0.0620753	-0.00750894	-0.0493362	-0.0392026	-0.0146038	-0.0208882	-0.022082	0.00558584	-0.0400966
0.021	-0.0506091	-0.0622257	-0.00268108	-0.0527536	-0.0377908	-0.0161419	-0.0210995	-0.0221271	0.00359722	-0.0420108
0.022	-0.0513105	-0.0618976	0.00195113	-0.0557717	-0.0364686	-0.0172458	-0.0211718	-0.0217674	0.00137266	-0.0425686
0.023	-0.0518473	-0.0609024	0.00634138	-0.0582654	-0.0353536	-0.0180129	-0.0213119	-0.0211864	-0.0011745	-0.0418998
0.024	-0.0521444	-0.05926	0.010514	-0.0600853	-0.03444	-0.0187036	-0.0215102	-0.0203701	-0.00390661	-0.0404613
0.025	-0.0521946	-0.0571359	0.0143371	-0.0609124	-0.0336153	-0.0195283	-0.0215426	-0.0191437	-0.00664368	-0.0385852
0.026	-0.052063	-0.0547065	0.0173221	-0.0604479	-0.032871	-0.0204658	-0.0210936	-0.0179078	-0.00943259	-0.036403
0.027	-0.0519007	-0.0522	0.0189467	-0.058799	-0.0322609	-0.0213608	-0.0199596	-0.0172488	-0.0122968	-0.0340544
0.028	-0.0518696	-0.0499393	0.0188569	-0.0564864	-0.0317134	-0.0221044	-0.0182953	-0.016966	-0.0149876	-0.0318124
0.029	-0.0520943	-0.0481672	0.0168429	-0.0540337	-0.0311321	-0.0227381	-0.0165032	-0.0165464	-0.0173705	-0.0299486
0.03	-0.0526051	-0.0469363	0.0130327	-0.0518468	-0.0306499	-0.0233614	-0.0152367	-0.0162584	-0.0198034	-0.0285959
0.031	-0.0532755	-0.0462193	0.00781362	-0.050345	-0.0304792	-0.0239257	-0.0159133	-0.0166475	-0.0227531	-0.0279058
0.032	-0.0539309	-0.0459895	0.00143331	-0.0499042	-0.0306396	-0.0243114	-0.0206304	-0.0174087	-0.0260828	-0.0280959
0.033	-0.0543877	-0.0461539	-0.00591944	-0.0507985	-0.031086	-0.0245623	-0.0310685	-0.0179428	-0.0290445	-0.029159
0.034	-0.0544389	-0.0465137	-0.0137282	-0.0531353	-0.031904	-0.0248727	-0.0475701	-0.0184587	-0.0310147	-0.0308381
0.035	-0.053965	-0.0469398	-0.0212947	-0.0566716	-0.0332549	-0.0254713	-0.0690435	-0.0192942	-0.0317863	-0.0329411
0.036	-0.052988	-0.0474625	-0.0282597	-0.0608462	-0.0351139	-0.02646	-0.0933559	-0.0198912	-0.0313043	-0.0354407
0.037	-0.0516875	-0.0480545	-0.0347247	-0.0650371	-0.0370719	-0.0276073	-0.117935	-0.0196165	-0.0297196	-0.0382221
0.038	-0.0503509	-0.0485157	-0.0409452	-0.0686886	-0.0385386	-0.0284761	-0.140327	-0.0187257	-0.0275194	-0.0407893
0.039	-0.0492669	-0.0486469	-0.0470902	-0.071375	-0.0391696	-0.02877	-0.158314	-0.0176805	-0.0251853	-0.042571
0.04	-0.0486095	-0.0483984	-0.0530987	-0.0729006	-0.0390381	-0.0283799	-0.169944	-0.0164647	-0.022987	-0.0434422
0.041	-0.0483443	-0.047878	-0.0586254	-0.0732158	-0.0384406	-0.0272344	-0.173943	-0.0150806	-0.0212592	-0.0433613
0.042	-0.0483581	-0.0473139	-0.0632534	-0.0722657	-0.037674	-0.0253021	-0.170119	-0.0139754	-0.0204004	-0.0419898
0.043	-0.0486045	-0.0469275	-0.0667897	-0.0700583	-0.0369592	-0.0227468	-0.1593	-0.0136372	-0.0205696	-0.0394049
0.044	-0.0490218	-0.0468439	-0.0692409	-0.0667745	-0.036438	-0.0199981	-0.14292	-0.0141416	-0.0217607	-0.0364767
0.045	-0.0494041	-0.0471904	-0.0705929	-0.0626947	-0.0362124	-0.0176034	-0.122753	-0.0153889	-0.0239564	-0.0340188
0.046	-0.0495159	-0.0481164	-0.0708185	-0.0581663	-0.0363318	-0.0160094	-0.100763	-0.0173592	-0.0268838	-0.0322137
0.047	-0.0493949	-0.0496425	-0.0698947	-0.053643	-0.0367693	-0.0154641	-0.0787046	-0.0198103	-0.0299577	-0.0310018
0.048	-0.0493243	-0.0515784	-0.0677863	-0.0495664	-0.0374687	-0.0160149	-0.0578026	-0.022296	-0.0327944	-0.0303845
0.049	-0.0495088	-0.0535862	-0.0646387	-0.0461614	-0.0383818	-0.0174638	-0.0388195	-0.0246422	-0.0354328	-0.0302449
0.05	-0.0499595	-0.0553337	-0.060794	-0.043359	-0.0394294	-0.0194144	-0.0223647	-0.0269125	-0.0378849	-0.0304005
0.051	-0.0506285	-0.0566314	-0.0565216	-0.0408625	-0.0404493	-0.0214908	-0.00905424	-0.0288695	-0.0398745	-0.0308033
0.052	-0.0515046	-0.0575015	-0.0518701	-0.0382942	-0.0412652	-0.0234468	0.000755425	-0.0299408	-0.0411709	-0.0313075
0.053	-0.0525447	-0.0580484	-0.0467441	-0.0354783	-0.0418213	-0.0251183	0.0071227	-0.0297131	-0.0419216	-0.0315368
0.054	-0.0536351	-0.0582479	-0.040991	-0.0327078	-0.0422098	-0.0263623	0.010288	-0.0279771	-0.0423315	-0.0313007
0.055	-0.0546873	-0.0580814	-0.0344523	-0.0305881	-0.0424823	-0.0270318	0.0106857	-0.024651	-0.0423982	-0.0308541
0.056	-0.0556678	-0.0576917	-0.0271868	-0.0293252	-0.0424798	-0.0270552	0.00908816	-0.0200158	-0.042468	-0.0305557
0.057	-0.0565424	-0.0572383	-0.0196434	-0.0283924	-0.042033	-0.0265214	0.00628229	-0.0146379	-0.043096	-0.0304692
0.058	-0.0573198	-0.0567698	-0.0125209	-0.027217	-0.041148	-0.0256354	0.00274865	-0.00915051	-0.0440631	-0.0305758
0.059	-0.0579704	-0.0561847	-0.00659092	-0.025713	-0.0398633	-0.0245818	-0.00112134	-0.00416187	-0.0445349	-0.0311584
0.06	-0.058196	-0.0553843	-0.00251425	-0.0240615	-0.0382091	-0.023417	-0.00470375	-0.000180555	-0.0440345	-0.0324041
0.061	-0.0576316	-0.0545004	-0.000675343	-0.0224762	-0.0362233	-0.0220803	-0.00737126	0.00227828	-0.0427536	-0.0339363
0.062	-0.0562618	-0.0538194	-0.00118594	-0.0212573	-0.033906	-0.0204753	-0.00903613	0.00280815	-0.0410363	-0.035292
0.063	-0.0543661	-0.0535339	-0.00392095	-0.0208572	-0.0313113	-0.0184839	-0.0101212	0.0014885	-0.0389648	-0.0364905
0.064	-0.0522009	-0.0535814	-0.0085724	-0.0216298	-0.0285766	-0.0159198	-0.0110594	-0.00121449	-0.0366824	-0.0377127
0.065	-0.0499374	-0.053772	-0.0146066	-0.0235984	-0.0259719	-0.0127025	-0.0120646	-0.00479628	-0.0345829	-0.0387611
0.066	-0.0478063	-0.0540253	-0.0212507	-0.0265796	-0.023931	-0.00915483	-0.0130961	-0.00869828	-0.0327965	-0.0393305
0.067	-0.0460984	-0.0544318	-0.0277762	-0.0302924	-0.0227705	-0.00593356	-0.0136582	-0.0122644	-0.0309561	-0.0395681
0.068	-0.045014	-0.0552015	-0.0336526	-0.0343583	-0.0225375	-0.00364768	-0.0125258	-0.0150012	-0.0288461	-0.0398354
0.069	-0.0446189	-0.0564423	-0.0385195	-0.0383712	-0.0232667	-0.00264045	-0.00795024	-0.0168198	-0.0266992	-0.0402368
0.07	-0.044909	-0.0580269	-0.0422747	-0.0420476	-0.0251033	-0.00310429	0.0014772	-0.0178211	-0.0244983	-0.0408116
0.071	-0.0458233	-0.0597601	-0.0451261	-0.0453003	-0.0280432	-0.00515773	0.0160322	-0.0178171	-0.0217572	-0.0418653
0.072	-0.0472022	-0.0614892	-0.0474615	-0.048046	-0.0318012	-0.00871275	0.034508	-0.0165701	-0.0183351	-0.0437335
0.073	-0.0487589	-0.0630672	-0.0495026	-0.0500309	-0.0359504	-0.0134303	0.0544564	-0.0145084	-0.0148822	-0.0463088
0.074	-0.0502216	-0.0642891	-0.0511494	-0.0510473	-0.0400298	-0.0188601	0.0732084	-0.0125084	-0.0121497	-0.0492609
0.075	-0.0514543	-0.0648772	-0.0522823	-0.0511729	-0.0437312	-0.0247034	0.0887974	-0.0111225	-0.010319	-0.0525532
0.076	-0.0523276	-0.0646152	-0.0529804	-0.050725	-0.0470624	-0.030905	0.100002	-0.0105719	-0.00946662	-0.0562214
0.077	-0.0527198	-0.0635272	-0.0534796	-0.0501336	-0.0501517	-0.0374838	0.106049	-0.0110995	-0.0101894	-0.0599529
0.078	-0.0526368	-0.0618842	-0.0539797	-0.0497013	-0.0529618	-0.0443645	0.10672	-0.0128249	-0.0130928	-0.0632169
0.079	-0.0521659	-0.0599879	-0.0544203	-0.0494001	-0.0553715	-0.0513177	0.102565	-0.0155991	-0.0179197	-0.0656408
0.08	-0.0515019	-0.0580399	-0.0546155	-0.0490794	-0.0574659	-0.0581541	0.094485	-0.0191776	-0.0237488	-0.067183
0.081	-0.0509854	-0.056218	-0.0544952	-0.0488496	-0.0594096	-0.0648255	0.0832378	-0.0232946	-0.0298787	-0.0680043
0.082	-0.0508342	-0.0546864	-0.0540451	-0.0491209	-0.061129	-0.0712222	0.0696183	-0.0277105	-0.0359638	-0.0682275
0.083	-0.0509632	-0.0535326	-0.0532201	-0.0502702	-0.0624532	-0.0771115	0.0546482	-0.0322254	-0.0415708	-0.0679051
0.084	-0.0511868	-0.0527088	-0.0519997	-0.0524122	-0.0634027	-0.0822055	0.0392379	-0.0365485	-0.0463336	-0.0670757
0.085	-0.0513403	-0.0519868	-0.0503767	-0.055406	-0.0642088	-0.0862295	0.0240816	-0.0404359	-0.0503042	-0.0657071
0.086	-0.0512827	-0.051134	-0.0483398	-0.0588004	-0.065165	-0.0890068	0.00996925	-0.0439589	-0.0535843	-0.0637833
0.087	-0.0509617	-0.0501525	-0.046078	-0.0618976	-0.0664406	-0.0904771	-0.00230411	-0.0473188	-0.0558682	-0.0614225
0.088	-0.0503737	-0.0491647	-0.0440407	-0.0641212	-0.0679383	-0.0906506	-0.0122676	-0.0504706	-0.0568829	-0.0587534
0.089	-0.0495111	-0.0482043	-0.042543	-0.0652306	-0.0692984	-0.0895669	-0.019718	-0.0532273	-0.0569331	-0.0557853
0.09	-0.0483937	-0.0472596	-0.0416037	-0.0651928	-0.0700466	-0.0873531	-0.0246317	-0.0556965	-0.0563506	-0.0524625
0.091	-0.0471439	-0.0463702	-0.0412606	-0.0640497	-0.069682	-0.0842988	-0.0273056	-0.058301	-0.0547978	-0.048858
0.092	-0.046003	-0.0457325	-0.0416867	-0.0618624	-0.067805	-0.0808533	-0.0282444	-0.0614308	-0.051852	-0.0452246
0.093	-0.04517	-0.0457497	-0.0429637	-0.0586889	-0.0644205	-0.0774912	-0.0278664	-0.0653641	-0.0480207	-0.0417812
0.094	-0.0447252	-0.0467838	-0.0449429	-0.054737	-0.0599128	-0.0744473	-0.0265689	-0.0702933	-0.0443322	-0.0386763
0.095	-0.0447577	-0.0488664	-0.0473898	-0.0503764	-0.0547679	-0.0716375	-0.0248727	-0.0759871	-0.0411451	-0.0361188
0.096	-0.0454123	-0.0516327	-0.0501522	-0.0458864	-0.0495753	-0.0689105	-0.023277	-0.0816518	-0.0382099	-0.0342679
0.097	-0.0467816	-0.054459	-0.0530905	-0.0414816	-0.0449561	-0.0662343	-0.022252	-0.0866011	-0.0355239	-0.0330565
0.098	-0.0488162	-0.056759	-0.0559759	-0.0375147	-0.0412931	-0.0635767	-0.0222198	-0.0907099	-0.0333099	-0.0322835
0.099	-0.0513678	-0.0581978	-0.058564	-0.0344312	-0.0386609	-0.0607657	-0.0231796	-0.0938225	-0.0313753	-0.0318453
0.1	-0.0543172	-0.0586613	-0.0606643	-0.032565	-0.0370249	-0.057526	-0.0248089	-0.0953646	-0.0293182	-0.0317661
0.101	-0.0576045	-0.058169	-0.0621408	-0.0319578	-0.0364293	-0.0536742	-0.0270554	-0.0949183	-0.0273471	-0.03199
0.102	-0.0611426	-0.0568421	-0.0629489	-0.0323618	-0.0368448	-0.04934	-0.0300256	-0.0925879	-0.0261426	-0.0322789
0.103	-0.064784	-0.05501	-0.0631803	-0.033267	-0.03804	-0.0448686	-0.0334362	-0.0886406	-0.0259173	-0.0324389
0.104	-0.068363	-0.053457	-0.0630857	-0.0338925	-0.0397402	-0.040481	-0.0367875	-0.0834729	-0.026333	-0.0324543
0.105	-0.0716984	-0.053234	-0.0630733	-0.0334878	-0.0417068	-0.0361783	-0.0398954	-0.0779159	-0.0273275	-0.0322695
0.106	-0.0745385	-0.054977	-0.0635416	-0.0316395	-0.0438161	-0.0318465	-0.0427518	-0.0727631	-0.0292172	-0.0316979
0.107	-0.0766137	-0.0584716	-0.0646565	-0.028221	-0.0460892	-0.0272265	-0.0450765	-0.0682395	-0.0319544	-0.0306169
0.108	-0.0778171	-0.0627883	-0.0663785	-0.023345	-0.0484183	-0.021946	-0.0464797	-0.0645403	-0.0350442	-0.0290328
0.109	-0.0782183	-0.0668005	-0.0685538	-0.0173517	-0.0505443	-0.0158598	-0.0469822	-0.0621205	-0.0383589	-0.026991
0.11	-0.0779014	-0.0696797	-0.0709852	-0.010704	-0.0524216	-0.00929159	-0.047052	-0.0608179	-0.0422994	-0.0247314
0.111	-0.0769159	-0.0710821	-0.0735361	-0.00388712	-0.0541232	-0.0027269	-0.0470981	-0.0596468	-0.0467998	-0.0228624
0.112	-0.0753528	-0.0710171	-0.0761138	0.00267119	-0.0554987	0.00353866	-0.0471816	-0.0580811	-0.0510584	-0.0220085
0.113	-0.0734301	-0.0697039	-0.0785984	0.00859281	-0.0563913	0.00933884	-0.0471802	-0.0565801	-0.0547262	-0.0224329
0.114	-0.0714751	-0.0676571	-0.0808439	0.0135771	-0.0568619	0.0145762	-0.0469223	-0.0554771	-0.058454	-0.024208
0.115	-0.0697964	-0.0655665	-0.0828121	0.0174527	-0.0570663	0.0191164	-0.0464014	-0.054445	-0.0627116	-0.0274001
0.116	-0.0685821	-0.0639567	-0.0846995	0.020081	-0.0571738	0.0225371	-0.0461119	-0.05328	-0.0668439	-0.0318976
0.117	-0.0678905	-0.0631976	-0.0867698	0.0213219	-0.0573075	0.0243083	-0.0468834	-0.0521103	-0.0699323	-0.0373278
0.118	-0.0677165	-0.0635366	-0.0890204	0.0211852	-0.0575371	0.0243001	-0.0493875	-0.050818	-0.0718601	-0.0432369
0.119	-0.0680066	-0.064872	-0.0911522	0.0199352	-0.0579405	0.0228825	-0.0538525	-0.0492132	-0.0729648	-0.0491709
0.12	-0.0686777	-0.0667592	-0.0928578	0.0180429	-0.058641	0.0205751	-0.0598881	-0.0476175	-0.0733784	-0.0545664
0.121	-0.0696926	-0.0686771	-0.0939955	0.0160851	-0.0596885	0.0176984	-0.0667244	-0.0464373	-0.0730998	-0.0588052
0.122	-0.0710206	-0.0701968	-0.0945843	0.014589	-0.0608648	0.0142638	-0.073774	-0.0453284	-0.0722205	-0.0615903
0.123	-0.0725467	-0.0709274	-0.0947796	0.0138482	-0.0618246	0.0101478	-0.0805138	-0.043725	-0.0708723	-0.0630388
0.124	-0.0740661	-0.0705215	-0.0948234	0.0138125	-0.062406	0.00536864	-0.0859231	-0.0418916	-0.0692161	-0.0633008
0.125	-0.0753436	-0.068846	-0.095015	0.0141505	-0.0626785	0.00011028	-0.0887412	-0.0403154	-0.067613	-0.0625287
0.126	-0.0761828	-0.0659996	-0.0956558	0.0145464	-0.0627697	-0.00537972	-0.0884002	-0.0388663	-0.0666027	-0.0610235
0.127	-0.0764969	-0.0623177	-0.0968674	0.0148483	-0.0627292	-0.0108075	-0.0851981	-0.0376171	-0.0666264	-0.0589833
0.128	-0.0763291	-0.0584165	-0.0985284	0.01483	-0.0624582	-0.015936	-0.0797235	-0.0371659	-0.0678712	-0.0565478
0.129	-0.0758154	-0.0549178	-0.100493	0.0141485	-0.0617568	-0.0207085	-0.0727747	-0.0374423	-0.0702579	-0.0541634
0.13	-0.0751569	-0.0520793	-0.102665	0.0126493	-0.0605929	-0.0252091	-0.0655905	-0.0376028	-0.0734281	-0.0524002
0.131	-0.0745434	-0.0498193	-0.10481	0.0103912	-0.0591237	-0.0295295	-0.0594047	-0.0374209	-0.0769788	-0.0515187
0.132	-0.0740175	-0.0480837	-0.106522	0.00739425	-0.0573972	-0.0337015	-0.0546612	-0.0374099	-0.0807759	-0.0515038
0.133	-0.0734732	-0.0470014	-0.107404	0.00357214	-0.0554031	-0.0376766	-0.0510356	-0.0374694	-0.0845717	-0.0522271
0.134	-0.0728359	-0.0465855	-0.107209	-0.00112416	-0.0533953	-0.041293	-0.0480669	-0.0368703	-0.0875224	-0.0533344
0.135	-0.0721337	-0.046615	-0.105763	-0.00654942	-0.0518194	-0.0443813	-0.0454755	-0.0354162	-0.0887704	-0.0543456
0.136	-0.0713994	-0.0469486	-0.102847	-0.0123654	-0.0508798	-0.0468619	-0.0432621	-0.0331958	-0.0882188	-0.0550648
0.137	-0.070631	-0.0475952	-0.0982517	-0.0182157	-0.0503592	-0.0486947	-0.0418151	-0.0298349	-0.0863151	-0.0555988
0.138	-0.0697761	-0.0484693	-0.0919449	-0.0238074	-0.0499165	-0.0498589	-0.0416776	-0.0252075	-0.0834352	-0.055851
0.139	-0.0687055	-0.0493524	-0.0842288	-0.0288638	-0.0493923	-0.0504177	-0.0429689	-0.0200156	-0.079922	-0.055392
0.14	-0.0672786	-0.0501068	-0.0756991	-0.0331596	-0.0486508	-0.0505435	-0.0452049	-0.0150175	-0.0764054	-0.0540116
0.141	-0.0654722	-0.0508066	-0.0671389	-0.0366369	-0.0473971	-0.0504093	-0.0477756	-0.0104478	-0.0733838	-0.0519052
0.142	-0.063478	-0.0515415	-0.0593338	-0.0394827	-0.0454613	-0.0501563	-0.0503696	-0.00631361	-0.0707418	-0.0492831
0.143	-0.061639	-0.0522415	-0.0528547	-0.041934	-0.0430561	-0.0499186	-0.0528615	-0.00268527	-0.0683061	-0.0463025
0.144	-0.0602004	-0.0528614	-0.0480248	-0.043995	-0.0406906	-0.0498079	-0.054941	0.00042074	-0.0662865	-0.0433491
0.145	-0.0591832	-0.053455	-0.0449059	-0.0455288	-0.039025	-0.0499464	-0.0561625	0.00311958	-0.0645416	-0.0409291
0.146	-0.0585027	-0.0540589	-0.0432247	-0.0464981	-0.0386056	-0.0503552	-0.0563615	0.00543899	-0.062335	-0.0392297
0.147	-0.0579845	-0.0547217	-0.0424078	-0.0470547	-0.0396021	-0.0509146	-0.0557423	0.00722864	-0.0594032	-0.0381747
0.148	-0.0573709	-0.0554644	-0.0417425	-0.0475067	-0.0418204	-0.0515165	-0.0546307	0.00834985	-0.0563438	-0.0378013
0.149	-0.0565444	-0.0562073	-0.0405455	-0.0481068	-0.0447973	-0.0520284	-0.053355	0.00877448	-0.053515	-0.0380647
0.15	-0.0556086	-0.0568798	-0.0383235	-0.0488335	-0.0479303	-0.0522286	-0.0522115	0.00865282	-0.0504256	-0.0385277
0.151	-0.0547621	-0.0574713	-0.034993	-0.0495307	-0.0506539	-0.0518852	-0.0512375	0.00842193	-0.046766	-0.0387245
0.152	-0.0542621	-0.0578665	-0.030891	-0.0502547	-0.0525557	-0.0508305	-0.0501831	0.00857439	-0.0430869	-0.0385936
0.153	-0.0544023	-0.0577886	-0.0265659	-0.0512659	-0.0535164	-0.0490292	-0.0488582	0.00921003	-0.0398062	-0.0382824
0.154	-0.0553198	-0.0571041	-0.0226686	-0.0526225	-0.0537468	-0.0465752	-0.0472436	0.00995873	-0.0365595	-0.0377606
0.155	-0.0568689	-0.0559618	-0.019859	-0.0540631	-0.0535555	-0.043527	-0.0453317	0.010362	-0.03312	-0.0368383
0.156	-0.058781	-0.0545435	-0.018569	-0.0552931	-0.0531275	-0.0398262	-0.0432289	0.0101984	-0.0299788	-0.035394
0.157	-0.0607757	-0.0529977	-0.0188534	-0.056034	-0.0525144	-0.0355198	-0.0411362	0.00940448	-0.0273892	-0.0333929
0.158	-0.0625762	-0.0514748	-0.0205745	-0.055983	-0.0517569	-0.0308768	-0.0385655	0.00778021	-0.0249066	-0.0308088
0.159	-0.0639863	-0.0500208	-0.0235729	-0.0550614	-0.0510393	-0.0261788	-0.0337969	0.00497746	-0.0224042	-0.0276554
0.16	-0.0648996	-0.0486586	-0.0275591	-0.0536058	-0.0506592	-0.0215921	-0.0245687	0.000876062	-0.0204327	-0.0240826
0.161	-0.0652941	-0.047534	-0.0321389	-0.0522371	-0.0507863	-0.0172781	-0.0094547	-0.00421441	-0.0194511	-0.0205383
0.162	-0.0651967	-0.0467815	-0.0369862	-0.0514201	-0.051314	-0.0135154	0.0109162	-0.00980405	-0.0194714	-0.0176863
0.163	-0.0645906	-0.0464251	-0.0418826	-0.0512359	-0.0519753	-0.0106567	0.0338138	-0.0155276	-0.0202571	-0.0159413
0.164	-0.0635237	-0.0464621	-0.0467579	-0.0515618	-0.05251	-0.00890474	0.055618	-0.0211618	-0.0215132	-0.0152451
0.165	-0.0622596	-0.0469072	-0.0515938	-0.0520458	-0.0527177	-0.00814403	0.0730808	-0.0265616	-0.0229273	-0.0153346
0.166	-0.061109	-0.0478655	-0.0561998	-0.0521613	-0.0525202	-0.00806804	0.0840489	-0.0316263	-0.0242717	-0.0160246
0.167	-0.0602302	-0.0494416	-0.0602917	-0.0515315	-0.0520567	-0.00836405	0.0876985	-0.0361564	-0.0256104	-0.0172304
0.168	-0.0598091	-0.0514275	-0.0637187	-0.0500412	-0.0516251	-0.00873114	0.0842977	-0.0399017	-0.0269433	-0.0188942
0.169	-0.0603064	-0.0533122	-0.0664881	-0.0479053	-0.0514748	-0.00882862	0.0747227	-0.0428444	-0.027801	-0.0209664
0.17	-0.0621788	-0.0546682	-0.0686799	-0.045526	-0.0516557	-0.00836163	0.0601583	-0.0452399	-0.0278965	-0.0234281
0.171	-0.0654334	-0.0554148	-0.0704229	-0.0429948	-0.0520276	-0.00727497	0.0420491	-0.0473274	-0.0275434	-0.0263664
0.172	-0.0696753	-0.0556885	-0.0718241	-0.0400778	-0.0524557	-0.00575505	0.0220174	-0.0490795	-0.0268441	-0.029954
0.173	-0.0742969	-0.055623	-0.0728284	-0.0367406	-0.0529171	-0.00411656	0.00162028	-0.0504347	-0.0254508	-0.0342225
0.174	-0.0785657	-0.0553367	-0.0734	-0.0332909	-0.0533549	-0.00267688	-0.0178284	-0.0516553	-0.0235073	-0.0389429
0.175	-0.0818815	-0.0549067	-0.0738565	-0.0300947	-0.0536803	-0.00160041	-0.0351553	-0.0531035	-0.0218446	-0.0437636
0.176	-0.0839102	-0.0543223	-0.0747409	-0.0273865	-0.0539348	-0.000865688	-0.0493543	-0.0548229	-0.0209866	-0.0483541
0.177	-0.0845525	-0.0535715	-0.0764524	-0.0252514	-0.0541958	-0.000417499	-0.0598977	-0.056557	-0.0207986	-0.052474
0.178	-0.0839976	-0.052721	-0.0791445	-0.0236218	-0.0544496	-0.00031269	-0.066779	-0.0580645	-0.0212375	-0.0561184
0.179	-0.0825501	-0.0518873	-0.0828334	-0.0223615	-0.0547099	-0.000629957	-0.0703396	-0.0593492	-0.022577	-0.0594674
0.18	-0.0804078	-0.0511829	-0.0874114	-0.0214583	-0.0550618	-0.00128046	-0.0711855	-0.0606091	-0.0247475	-0.0625237
0.181	-0.0777599	-0.0507846	-0.0926283	-0.0210487	-0.055582	-0.00182464	-0.0700297	-0.0619236	-0.0273244	-0.065043
0.182	-0.0748814	-0.0510019	-0.0981809	-0.0213438	-0.056317	-0.00149127	-0.0674522	-0.0630275	-0.0303033	-0.0667949
0.183	-0.0720049	-0.0520405	-0.103774	-0.0225684	-0.0573528	0.000358436	-0.0637878	-0.0636092	-0.0340902	-0.0676496
0.184	-0.0692065	-0.0536869	-0.109165	-0.02481	-0.0588882	0.00379123	-0.0592799	-0.0637147	-0.038627	-0.0675356
0.185	-0.0664996	-0.0554121	-0.114114	-0.0280223	-0.0610038	0.00830965	-0.0542837	-0.0634561	-0.0431964	-0.0663784
0.186	-0.0639787	-0.05681	-0.11828	-0.0321821	-0.0633529	0.013121	-0.049214	-0.0624903	-0.0473803	-0.0640693
0.187	-0.061805	-0.0578388	-0.121303	-0.0371562	-0.065355	0.017442	-0.0444746	-0.0604755	-0.0515241	-0.0606967
0.188	-0.0604483	-0.0586276	-0.122949	-0.0424751	-0.0666463	0.0206557	-0.0405005	-0.0579276	-0.0556728	-0.056699
0.189	-0.0609252	-0.0592223	-0.123146	-0.0475826	-0.067232	0.022287	-0.037564	-0.055647	-0.058971	-0.0525232
0.19	-0.0639025	-0.0596228	-0.122019	-0.0521594	-0.0673217	0.0220629	-0.0355314	-0.053637	-0.0608649	-0.0483324
0.191	-0.0687936	-0.0598163	-0.119855	-0.0561079	-0.067177	0.0199494	-0.0340907	-0.0516918	-0.0619253	-0.0442424
0.192	-0.0742798	-0.0596866	-0.116975	-0.0595467	-0.0670086	0.0160071	-0.0330258	-0.050266	-0.0628353	-0.0405327
0.193	-0.079142	-0.0591076	-0.113704	-0.0628084	-0.0668769	0.0103917	-0.0320666	-0.0497126	-0.0635773	-0.037442
0.194	-0.0825441	-0.0579681	-0.110301	-0.0662582	-0.0667455	0.00347915	-0.0309148	-0.0495641	-0.0641621	-0.0349047
0.195	-0.0840226	-0.0560524	-0.106896	-0.0700775	-0.0665871	-0.00422119	-0.0295014	-0.0493953	-0.0650609	-0.0325675
0.196	-0.0834119	-0.0532434	-0.103586	-0.0742021	-0.0664609	-0.0123161	-0.0278797	-0.0494556	-0.0663173	-0.0302583
0.197	-0.0808459	-0.0497678	-0.100497	-0.0783838	-0.0665225	-0.0205512	-0.0261329	-0.0498046	-0.0671904	-0.0282937
0.198	-0.0768257	-0.0461344	-0.0977653	-0.08226	-0.0669203	-0.0286034	-0.0244806	-0.0498475	-0.0673137	-0.0270662
0.199	-0.0720736	-0.0430481	-0.0954549	-0.0854713	-0.0677376	-0.036039	-0.0231612	-0.0493043	-0.0673363	-0.0266993
0.2	-0.0672011	-0.0412509	-0.0935123	-0.0877712	-0.0689362	-0.0424496	-0.0224093	-0.0486272	-0.0678084	-0.0271029
0.201	-0.0626258	-0.0411644	-0.0918013	-0.0890724	-0.0702833	-0.0475591	-0.0226449	-0.0480018	-0.0683608	-0.028116
0.202	-0.0586545	-0.042655	-0.0902353	-0.0894586	-0.0714453	-0.0511855	-0.0242926	-0.0470473	-0.0684556	-0.0296101
0.203	-0.05552	-0.0451534	-0.0888665	-0.0890667	-0.0721724	-0.0531925	-0.0273906	-0.0457823	-0.0679843	-0.0313471
0.204	-0.0534318	-0.0480597	-0.0877943	-0.0878804	-0.0723993	-0.0535945	-0.0315624	-0.0448235	-0.0667883	-0.0330757
0.205	-0.0525008	-0.0510392	-0.0871265	-0.0857524	-0.072231	-0.0525545	-0.0362261	-0.0444283	-0.0645133	-0.0348889
0.206	-0.0525816	-0.0539568	-0.0869626	-0.0827472	-0.0718138	-0.0502412	-0.0403142	-0.0442125	-0.0611617	-0.0369861
0.207	-0.0533811	-0.0567256	-0.0873138	-0.0793865	-0.0712466	-0.0467331	-0.0416686	-0.0440375	-0.0571977	-0.0392569
0.208	-0.0546795	-0.0592479	-0.0881305	-0.0763797	-0.0706116	-0.0421115	-0.0375103	-0.0442492	-0.0530315	-0.041482
0.209	-0.0563808	-0.0614833	-0.0893045	-0.0741968	-0.0699655	-0.0367396	-0.0258229	-0.044812	-0.0486397	-0.043702
0.21	-0.0584396	-0.0635265	-0.0905887	-0.0730014	-0.0693252	-0.0312467	-0.00603292	-0.0451296	-0.0439466	-0.0460947
0.211	-0.061013	-0.0654321	-0.0916738	-0.072764	-0.0687471	-0.0261632	0.0211859	-0.0449069	-0.0394414	-0.0486056
0.212	-0.0647015	-0.0670781	-0.0923047	-0.0733234	-0.0683217	-0.0217415	0.054116	-0.0445374	-0.0357848	-0.0510358
0.213	-0.0699397	-0.0683447	-0.0922594	-0.0744621	-0.0680309	-0.0181256	0.0900701	-0.0443917	-0.0328743	-0.0533926
0.214	-0.0762518	-0.0692563	-0.0913789	-0.0760228	-0.0677909	-0.0154707	0.125735	-0.0441677	-0.030046	-0.0557385
0.215	-0.082547	-0.069971	-0.0895826	-0.0779246	-0.0675597	-0.0137545	0.157857	-0.0433547	-0.0270901	-0.057766
0.216	-0.0877507	-0.0707044	-0.0867858	-0.0800346	-0.0672598	-0.0126383	0.183894	-0.0419641	-0.0242204	-0.058938
0.217	-0.0911697	-0.0715704	-0.0829253	-0.0821495	-0.0667667	-0.0115843	0.202393	-0.0403148	-0.0211848	-0.0590533
0.218	-0.0925893	-0.0724808	-0.0780933	-0.0840451	-0.0660072	-0.0101081	0.213137	-0.0385244	-0.0173364	-0.0582811
0.219	-0.0921095	-0.0731843	-0.0725929	-0.0853994	-0.0650033	-0.00808009	0.216613	-0.0367084	-0.0125925	-0.0566756
0.22	-0.0900396	-0.073437	-0.0667847	-0.0858168	-0.0638266	-0.00578164	0.213096	-0.0352544	-0.00750914	-0.0542082
0.221	-0.0869212	-0.0731013	-0.0609663	-0.0850409	-0.0625548	-0.00354817	0.202516	-0.0342946	-0.00239055	-0.0512367
0.222	-0.0833444	-0.0720987	-0.0555212	-0.083092	-0.061216	-0.00151258	0.185076	-0.0332051	0.00277325	-0.0482912
0.223	-0.0796537	-0.070471	-0.0509359	-0.0802323	-0.0597656	0.000134219	0.161562	-0.031405	0.00752207	-0.0454971
0.224	-0.0759854	-0.0684475	-0.0475522	-0.0768271	-0.0582175	0.000917187	0.133202	-0.0292285	0.011136	-0.0427698
0.225	-0.0724721	-0.0663796	-0.0455274	-0.0731976	-0.05675	0.000408633	0.101577	-0.0272428	0.0135633	-0.0402293
0.226	-0.0691747	-0.0646153	-0.0449307	-0.0696438	-0.0556214	-0.00126329	0.0687449	-0.0254633	0.0151829	-0.0379324
0.227	-0.0660252	-0.0633212	-0.0455873	-0.066571	-0.0549644	-0.00347296	0.0371246	-0.023934	0.0159835	-0.0356051
0.228	-0.0630332	-0.0623423	-0.0469688	-0.0643601	-0.0546794	-0.00569366	0.00910733	-0.0232375	0.0159142	-0.033093
0.229	-0.0603886	-0.0611664	-0.048332	-0.0630933	-0.0545074	-0.00778413	-0.013154	-0.023573	0.0155467	-0.0307775
0.23	-0.058336	-0.0590725	-0.048776	-0.0626354	-0.0542183	-0.009834	-0.0281166	-0.0242311	0.0156256	-0.0290991
0.231	-0.0569993	-0.0554434	-0.0473666	-0.062949	-0.0537931	-0.0120815	-0.0354634	-0.0250269	0.0163702	-0.0279647
0.232	-0.0563568	-0.0501678	-0.043531	-0.0640836	-0.0533387	-0.01487	-0.0361072	-0.0267664	0.0176761	-0.0270967
0.233	-0.0563809	-0.0438741	-0.0372881	-0.0658956	-0.052908	-0.0184256	-0.0315923	-0.0292014	0.0196068	-0.0265939
0.234	-0.0573395	-0.0374457	-0.0290803	-0.0679905	-0.0524878	-0.0226605	-0.0238244	-0.0306208	0.0221558	-0.0264601
0.235	-0.0599433	-0.0314127	-0.0195317	-0.0699056	-0.0519429	-0.0271426	-0.0149865	-0.0302772	0.024808	-0.0260378
0.236	-0.0646611	-0.0261032	-0.00939488	-0.0713117	-0.0510683	-0.0311098	-0.00695835	-0.0289563	0.0269	-0.02469
0.237	-0.071097	-0.0219425	0.000441788	-0.0720736	-0.0498197	-0.0336612	-0.000765415	-0.026947	0.0282463	-0.0224514
0.238	-0.0782829	-0.0194051	0.009115	-0.072118	-0.0482197	-0.0341761	0.0031726	-0.0237594	0.0289797	-0.0194424
0.239	-0.0850741	-0.018838	0.0159993	-0.071369	-0.0461652	-0.0325055	0.00453489	-0.019676	0.0290817	-0.0154059
0.24	-0.0903993	-0.0202733	0.0207326	-0.0698032	-0.0435628	-0.0288038	0.00322269	-0.0154831	0.0285437	-0.0103781
0.241	-0.0935706	-0.0234395	0.0232029	-0.0674403	-0.0404636	-0.0233983	-0.000314846	-0.0111392	0.0276299	-0.00500883
0.242	-0.0943906	-0.0279262	0.0235723	-0.064331	-0.0370153	-0.0167443	-0.00540877	-0.00647329	0.0266081	0.000318653
0.243	-0.0930303	-0.0332403	0.0222092	-0.060605	-0.0334122	-0.0093733	-0.0115931	-0.00234383	0.0253966	0.00576616
0.244	-0.0899133	-0.0388515	0.0195822	-0.0564711	-0.0298328	-0.00197241	-0.018418	0.00042207	0.0237402	0.011137
0.245	-0.0855446	-0.0442667	0.0161792	-0.0521914	-0.0263299	0.00462187	-0.0253038	0.00222026	0.0218449	0.0156955
0.246	-0.0804003	-0.0490878	0.0125208	-0.0480315	-0.0228732	0.00970983	-0.0318405	0.00366763	0.0203247	0.0190169
0.247	-0.0750052	-0.0531227	0.00910672	-0.0442205	-0.0195059	0.0129341	-0.0379381	0.00440833	0.0192623	0.021161
0.248	-0.0698457	-0.0564405	0.00616778	-0.040988	-0.0164203	0.0142329	-0.0434665	0.00389911	0.0179813	0.0220946
0.249	-0.0652315	-0.0591752	0.00363155	-0.0385381	-0.0138962	0.0137107	-0.0481056	0.00268842	0.0158304	0.0216761
0.25	-0.061346	-0.0612915	0.00132737	-0.0369529	-0.0121283	0.0115364	-0.051812	0.0019476	0.0127631	0.0199666
0.251	-0.0582454	-0.0627495	-0.00102015	-0.036137	-0.0111294	0.00795874	-0.0550048	0.00200266	0.00934795	0.0171089
0.252	-0.0558927	-0.0637379	-0.00369298	-0.0358223	-0.0108299	0.0032602	-0.058083	0.00232038	0.00629791	0.0132744
0.253	-0.0542549	-0.0644936	-0.00662085	-0.0356727	-0.0111493	-0.00238145	-0.0609889	0.0028401	0.0036889	0.00893
0.254	-0.0532598	-0.06509	-0.00950167	-0.0354315	-0.0119469	-0.00880199	-0.0633744	0.00400349	0.000809151	0.00470778
0.255	-0.0527687	-0.0654962	-0.012177	-0.0349544	-0.0131497	-0.015627	-0.0650323	0.00541859	-0.00302662	0.000925719
0.256	-0.0527027	-0.0656677	-0.0146206	-0.0340596	-0.0148283	-0.0223152	-0.0659378	0.00607907	-0.00772525	-0.00239952
0.257	-0.0531746	-0.0655642	-0.0168446	-0.0325281	-0.0169135	-0.0284013	-0.066062	0.00599371	-0.0126132	-0.00507742
0.258	-0.0542866	-0.0651816	-0.0189592	-0.0303538	-0.0192211	-0.0335263	-0.0654441	0.00591214	-0.0172522	-0.00661824
0.259	-0.0557888	-0.0645051	-0.0210809	-0.0276444	-0.0217727	-0.0374101	-0.0643412	0.00568078	-0.0216822	-0.00679034
0.26	-0.0572173	-0.063427	-0.0231405	-0.0243855	-0.0246131	-0.0399624	-0.0630694	0.00467117	-0.0258463	-0.00608666
0.261	-0.0582503	-0.061877	-0.0250026	-0.0206453	-0.0275471	-0.0412186	-0.0616981	0.00339721	-0.0293395	-0.00519184
0.262	-0.0587793	-0.0599982	-0.0265749	-0.0167334	-0.0303939	-0.0413025	-0.0601172	0.00294703	-0.0318415	-0.00416591
0.263	-0.058839	-0.0581062	-0.0277518	-0.0131205	-0.0332132	-0.0406133	-0.0583516	0.00319716	-0.0333571	-0.00270936
0.264	-0.0585763	-0.0565623	-0.0285661	-0.0104105	-0.0361047	-0.039753	-0.056532	0.00326542	-0.0340198	-0.000950321
0.265	-0.0582111	-0.055588	-0.029257	-0.00914665	-0.0390407	-0.039159	-0.0546557	0.00325549	-0.0340446	0.000688236
0.266	-0.0579198	-0.0550773	-0.0301112	-0.00955554	-0.0420545	-0.0389862	-0.0525986	0.00387206	-0.0337236	0.00216628
0.267	-0.0577597	-0.0547718	-0.0312986	-0.0115524	-0.0453158	-0.0392683	-0.0504336	0.00493351	-0.0330855	0.00375263
0.268	-0.0577621	-0.0546056	-0.0327559	-0.0148319	-0.0488615	-0.0399181	-0.048585	0.00587461	-0.0318447	0.00543188
0.269	-0.0579881	-0.0546284	-0.0342979	-0.0189344	-0.0524318	-0.0406292	-0.0474712	0.00705734	-0.030026	0.00696344
0.27	-0.0584275	-0.0547006	-0.035864	-0.0233394	-0.0557027	-0.0410438	-0.0470862	0.00908689	-0.0282461	0.00843632
0.271	-0.058951	-0.0545029	-0.0375004	-0.0275677	-0.0587101	-0.0410351	-0.0470311	0.0115296	-0.0269173	0.010167
0.272	-0.0593962	-0.053759	-0.0392101	-0.0312608	-0.061856	-0.0407222	-0.046855	0.0136215	-0.0255569	0.0120755
0.273	-0.0595883	-0.0524421	-0.0409749	-0.0341406	-0.0654067	-0.0402573	-0.0462089	0.0154165	-0.0234641	0.0137408
0.274	-0.0593273	-0.050812	-0.0427809	-0.0359061	-0.0691603	-0.0396862	-0.0448009	0.0170745	-0.0206566	0.0150366
0.275	-0.0585186	-0.0491792	-0.044577	-0.0363663	-0.072607	-0.0389574	-0.0425299	0.0178594	-0.0174717	0.0162254
0.276	-0.0572302	-0.0477692	-0.0462588	-0.0357178	-0.0753188	-0.0379156	-0.0395774	0.0170212	-0.0138295	0.0174561
0.277	-0.0555485	-0.0467195	-0.0476881	-0.0344917	-0.0771558	-0.036334	-0.0361819	0.0149198	-0.00973755	0.0185816
0.278	-0.0535969	-0.0460422	-0.0487037	-0.0332431	-0.0782151	-0.034098	-0.0325793	0.0122756	-0.00583537	0.0195856
0.279	-0.0516222	-0.0457053	-0.0489971	-0.0323435	-0.0786948	-0.0312423	-0.0291061	0.00923739	-0.00259829	0.0208403
0.28	-0.0497196	-0.0457204	-0.0480925	-0.0320385	-0.0787417	-0.0277137	-0.0259011	0.00591543	0.000226463	0.0227834
0.281	-0.0475757	-0.0461048	-0.0456052	-0.0326181	-0.0782917	-0.0233831	-0.0227477	0.0028677	0.00275606	0.0257132
0.282	-0.0445889	-0.0468091	-0.041332	-0.0342886	-0.0770964	-0.0182204	-0.0193864	0.000362026	0.00455032	0.0300453
0.283	-0.0401345	-0.0476884	-0.0350062	-0.0370034	-0.0749893	-0.0120651	-0.0155488	-0.00218667	0.00558392	0.0363574
0.284	-0.0337383	-0.0484962	-0.0261376	-0.0405084	-0.0719393	-0.00443612	-0.0108537	-0.00532016	0.00660872	0.0450754
0.285	-0.0250854	-0.0489372	-0.0141608	-0.0443586	-0.0678949	0.0052743	-0.00496488	-0.00865095	0.0081757	0.0564311
0.286	-0.0140184	-0.0487234	0.00130747	-0.0479968	-0.0628203	0.0176444	0.00244609	-0.0115884	0.0101843	0.0706416
0.287	-0.000503626	-0.0475145	0.0203986	-0.0509231	-0.0567129	0.0332411	0.0119116	-0.014191	0.0125415	0.0879093
0.288	0.0155606	-0.0449924	0.0431046	-0.0528444	-0.0494313	0.0525959	0.0240752	-0.0165224	0.0154097	0.108323
0.289	0.0343876	-0.0410128	0.0692898	-0.0537028	-0.0406143	0.076011	0.039346	-0.0178422	0.0187551	0.131791
0.29	0.0561456	-0.0355256	0.0987069	-0.0535504	-0.0298316	0.103366	0.0577117	-0.0171497	0.0224655	0.158125
0.291	0.0810402	-0.0284248	0.131203	-0.052322	-0.016937	0.134224	0.0790021	-0.014004	0.0268593	0.187159
0.292	0.109499	-0.0194785	0.166784	-0.0496582	-0.00226278	0.168197	0.103405	-0.00822327	0.0324585	0.218709
0.293	0.14203	-0.00832543	0.205408	-0.0452018	0.0137737	0.205184	0.131484	0.000593679	0.0395067	0.252794
0.294	0.178908	0.00543484	0.246818	-0.0390673	0.0311481	0.245359	0.163546	0.0125931	0.0479448	0.289812
0.295	0.220024	0.0221055	0.290506	-0.0316804	0.050169	0.288946	0.199475	0.0271937	0.0576538	0.330114
0.296	0.264444	0.0418518	0.335541	-0.0233158	0.0712348	0.335967	0.23933	0.0437699	0.0688163	0.373494
0.297	0.309812	0.0648899	0.380303	-0.0140062	0.0947645	0.38616	0.283496	0.0625197	0.0818353	0.419362
0.298	0.352983	0.0917228	0.422563	-0.00363212	0.121111	0.438938	0.331947	0.083932	0.0968089	0.467184
0.299	0.391125	0.123073	0.459982	0.00805448	0.150513	0.49326	0.384191	0.107936	0.113677	0.516343
0.3	0.421791	0.159627	0.490766	0.021406	0.18326	0.54747	0.440606	0.134382	0.132806	0.565589
0.301	0.442872	0.201878	0.513997	0.0368736	0.219753	0.599444	0.502724	0.163673	0.154798	0.612882
0.302	0.453056	0.249962	0.529532	0.0549874	0.260158	0.647177	0.571349	0.196427	0.179972	0.655941
0.303	0.452422	0.303321	0.538183	0.076368	0.30396	0.689156	0.644937	0.233108	0.208585	0.692992
0.304	0.44302	0.360299	0.542198	0.101801	0.349902	0.724366	0.720067	0.274176	0.241207	0.722961
0.305	0.429448	0.418008	0.54553	0.132187	0.396147	0.752628	0.792797	0.31993	0.278313	0.745717
0.306	0.419039	0.472569	0.553839	0.168426	0.440279	0.775203	0.859166	0.369781	0.319649	0.762989
0.307	0.421002	0.519624	0.573937	0.211158	0.479409	0.795033	0.915534	0.422171	0.364339	0.778774
0.308	0.444332	0.555065	0.61233	0.260204	0.510555	0.816475	0.960041	0.475407	0.411479	0.79845
0.309	0.495056	0.576172	0.673407	0.314205	0.531074	0.844824	0.994332	0.528122	0.460304	0.827668
0.31	0.573856	0.582923	0.75824	0.370634	0.539165	0.885753	1.02362	0.579113	0.509885	0.871965
0.311	0.675405	0.578719	0.864352	0.42612	0.534561	0.944564	1.05503	0.627107	0.559001	0.936482
0.312	0.790086	0.570339	0.986202	0.477132	0.519367	1.02526	1.09593	0.670785	0.606107	1.025
0.313	0.907165	0.5672	1.11628	0.5206	0.498455	1.1298	1.15308	0.709154	0.649466	1.13887
0.314	1.01702	0.579609	1.24649	0.554438	0.479232	1.25763	1.23176	0.741753	0.687793	1.27676
0.315	1.11196	0.615973	1.36923	0.577814	0.470863	1.40576	1.3348	0.76878	0.720749	1.43482
0.316	1.18725	0.680026	1.47767	0.591063	0.482896	1.56927	1.46198	0.791773	0.748738	1.60678
0.317	1.24077	0.769291	1.56518	0.595906	0.523464	1.74189	1.61059	0.814262	0.773049	1.78386
0.318	1.27071	0.875432	1.62448	0.595979	0.597347	1.91626	1.77585	0.841376	0.796912	1.95567
0.319	1.27543	0.986809	1.64804	0.59716	0.704579	2.0845	1.95057	0.878846	0.825739	2.11223
0.32	1.25636	1.09232	1.63083	0.607098	0.840454	2.2391	2.12522	0.932483	0.865768	2.24605
0.321	1.21874	1.18464	1.57319	0.633658	0.996873	2.37392	2.2895	1.00716	0.922574	2.35274
0.322	1.16819	1.26149	1.48066	0.68286	1.16393	2.48448	2.43413	1.10516	1.00022	2.43021
0.323	1.10754	1.32424	1.36092	0.757053	1.33107	2.56778	2.55173	1.22604	1.10103	2.47728
0.324	1.03738	1.3747	1.22123	0.854244	1.48777	2.62193	2.63707	1.3677	1.22544	2.49293
0.325	0.959106	1.41254	1.06855	0.968927	1.62293	2.64558	2.68694	1.52605	1.3717	2.47639
0.326	0.877298	1.43543	0.911515	1.09344	1.72379	2.63833	2.69988	1.69403	1.53589	2.42875
0.327	0.800552	1.44125	0.762224	1.21922	1.77763	2.60214	2.67644	1.86245	1.71233	2.3548
0.328	0.740177	1.4297	0.635239	1.33788	1.77663	2.54215	2.61995	2.02168	1.89396	2.26326
0.329	0.707094	1.40147	0.543287	1.44198	1.72191	2.46591	2.53722	2.1621	2.07245	2.16484
0.33	0.708434	1.35643	0.492912	1.52494	1.62307	2.3809	2.43758	2.27527	2.23885	2.06901
0.331	0.743458	1.29379	0.482005	1.58009	1.49436	2.2919	2.33026	2.35599	2.38481	1.98146
0.332	0.800011	1.21407	0.498889	1.59993	1.34997	2.19947	2.22152	2.40263	2.50374	1.90283
0.333	0.857517	1.12116	0.524895	1.57853	1.20069	2.10045	2.11312	2.41536	2.59132	1.82911
0.334	0.895809	1.02287	0.541058	1.51527	1.05364	1.99029	2.0025	2.39518	2.6454	1.75376
0.335	0.901701	0.929924	0.534566	1.4162	0.915175	1.86561	1.88453	2.34517	2.66598	1.67083
0.336	0.870371	0.853395	0.500763	1.29208	0.793478	1.72546	1.75433	2.27133	2.65564	1.57664
0.337	0.803433	0.801509	0.441026	1.15515	0.697273	1.57133	1.60954	2.18166	2.61956	1.46949
0.338	0.705619	0.776766	0.359147	1.01588	0.631618	1.40618	1.45076	2.08494	2.56407	1.34895
0.339	0.581777	0.774161	0.258494	0.881629	0.593651	1.23308	1.28046	1.98951	2.49575	1.21545
0.34	0.435327	0.782086	0.140883	0.758064	0.571533	1.05443	1.10145	1.90063	2.42143	1.06972
0.341	0.268035	0.786205	0.00649122	0.651903	0.548612	0.871275	0.916155	1.81799	2.34706	0.911587
0.342	0.0801702	0.774052	-0.146208	0.571438	0.510633	0.682637	0.726261	1.7366	2.27471	0.739209
0.343	-0.129562	0.738399	-0.320585	0.52346	0.450927	0.485269	0.531906	1.65048	2.20075	0.549364
0.344	-0.363898	0.678263	-0.521245	0.508238	0.370592	0.273927	0.330963	1.55558	2.11815	0.338063
0.345	-0.625612	0.596891	-0.752091	0.516044	0.274994	0.0421439	0.119361	1.44999	2.02039	0.101059
0.346	-0.914929	0.49814	-1.01362	0.528786	0.169643	-0.216482	-0.108287	1.33367	1.90341	-0.165166
0.347	-1.22718	0.384205	-1.30058	0.526872	0.0576821	-0.506351	-0.357917	1.20813	1.76528	-0.461427
0.348	-1.55167	0.256262	-1.60105	0.496636	-0.0606937	-0.827685	-0.634003	1.07545	1.60621	-0.783951
0.349	-1.87226	0.122995	-1.89746	0.433569	-0.187955	-1.17506	-0.936904	0.936968	1.42897	-1.12407
0.35	-2.16961	0.00774841	-2.16926	0.340678	-0.328877	-1.53731	-1.26165	0.792501	1.23791	-1.46934
0.351	-2.42428	-0.0720098	-2.39618	0.224646	-0.490061	-1.89894	-1.59852	0.640009	1.03656	-1.8051
0.352	-2.6196	-0.133997	-2.56157	0.0922918	-0.678688	-2.24249	-1.9341	0.475301	0.826239	-2.11608
0.353	-2.74398	-0.226361	-2.65479	-0.0514988	-0.900178	-2.55086	-2.25272	0.29255	0.606731	-2.38826
0.354	-2.79216	-0.399429	-2.67223	-0.204365	-1.15548	-2.80923	-2.53862	0.0856699	0.376736	-2.61034
0.355	-2.76522	-0.683789	-2.61686	-0.366524	-1.4389	-3.00653	-2.77801	-0.150568	0.132864	-2.77449
0.356	-2.66985	-1.07936	-2.49674	-0.540783	-1.73741	-3.13618	-2.96017	-0.419363	-0.130176	-2.87699
0.357	-2.5171	-1.55377	-2.32285	-0.732036	-2.03206	-3.19623	-3.07841	-0.71991	-0.416623	-2.91807
0.358	-2.32086	-2.05265	-2.10764	-0.945546	-2.30097	-3.18913	-3.13087	-1.04574	-0.726761	-2.9012
0.359	-2.09617	-2.51699	-1.8646	-1.18407	-2.52305	-3.1211	-3.11998	-1.38484	-1.05655	-2.83243
0.36	-1.85771	-2.89736	-1.60809	-1.44519	-2.6812	-3.00113	-3.05121	-1.72182	-1.39818	-2.72
0.361	-1.61855	-3.1609	-1.35264	-1.72014	-2.76452	-2.8399	-2.93226	-2.04043	-1.74015	-2.57348
0.362	-1.38947	-3.29274	-1.11179	-1.99431	-2.76942	-2.64878	-2.77294	-2.32517	-2.06804	-2.40275
0.363	-1.17872	-3.29399	-0.89672	-2.24937	-2.69947	-2.43892	-2.58436	-2.56223	-2.36695	-2.21709
0.364	-0.99197	-3.17831	-0.71504	-2.46624	-2.56405	-2.22053	-2.37753	-2.7414	-2.62392	-2.02499
0.365	-0.832454	-2.96788	-0.570334	-2.62841	-2.37637	-2.00228	-2.16234	-2.85751	-2.82843	-1.83397
0.366	-0.701241	-2.68943	-0.462598	-2.72436	-2.15167	-1.79115	-1.94755	-2.90992	-2.97276	-1.65001
0.367	-0.597555	-2.37053	-0.389184	-2.74872	-1.90563	-1.5923	-1.74056	-2.90116	-3.05323	-1.47719
0.368	-0.519167	-2.03666	-0.345693	-2.7024	-1.6531	-1.40921	-1.54665	-2.83681	-3.07081	-1.31814
0.369	-0.462878	-1.70968	-0.326652	-2.59188	-1.40704	-1.24377	-1.36897	-2.72548	-3.03012	-1.1744
0.37	-0.425056	-1.40681	-0.326265	-2.42792	-1.17782	-1.09669	-1.20928	-2.57757	-2.93799	-1.04646
0.371	-0.402122	-1.14024	-0.339053	-2.22382	-0.972686	-0.967744	-1.06814	-2.40354	-2.80325	-0.933903
0.372	-0.390752	-0.917062	-0.360151	-1.99387	-0.795724	-0.856017	-0.944938	-2.2132	-2.63638	-0.835846
0.373	-0.387808	-0.739773	-0.385557	-1.75194	-0.64847	-0.760084	-0.838233	-2.01554	-2.44795	-0.751082
0.374	-0.390348	-0.607118	-0.412243	-1.51044	-0.530509	-0.678291	-0.746254	-1.81835	-2.24714	-0.678051
0.375	-0.395965	-0.515209	-0.437899	-1.27991	-0.439815	-0.608959	-0.667189	-1.62772	-2.04221	-0.614972
0.376	-0.402936	-0.458532	-0.460695	-1.06868	-0.373217	-0.550478	-0.599282	-1.44836	-1.84091	-0.560171
0.377	-0.409997	-0.430685	-0.479367	-0.882519	-0.326985	-0.501265	-0.54084	-1.28385	-1.64952	-0.5122
0.378	-0.416295	-0.424885	-0.493219	-0.724647	-0.297285	-0.459795	-0.489844	-1.13634	-1.47199	-0.469768
0.379	-0.421456	-0.434531	-0.502	-0.595935	-0.280367	-0.424675	-0.443143	-1.00644	-1.31061	-0.431964
0.38	-0.425344	-0.453836	-0.505897	-0.495484	-0.27265	-0.394599	-0.397068	-0.893941	-1.16663	-0.398348
0.381	-0.427919	-0.478071	-0.505569	-0.421109	-0.271067	-0.368344	-0.349182	-0.797856	-1.03996	-0.368518
0.382	-0.429252	-0.5036	-0.502006	-0.369675	-0.273241	-0.344819	-0.298788	-0.716169	-0.929238	-0.341787
0.383	-0.429432	-0.527944	-0.496228	-0.337394	-0.277247	-0.323157	-0.246293	-0.646478	-0.832782	-0.31756
0.384	-0.42861	-0.549523	-0.489083	-0.320265	-0.281558	-0.302751	-0.192813	-0.58685	-0.749147	-0.295586
0.385	-0.427046	-0.567258	-0.48119	-0.314518	-0.285163	-0.283182	-0.14015	-0.53576	-0.676758	-0.275557
0.386	-0.424986	-0.580468	-0.472953	-0.316787	-0.287496	-0.26421	-0.0906022	-0.491495	-0.613848	-0.257034
0.387	-0.422596	-0.588883	-0.464708	-0.324144	-0.288254	-0.245765	-0.0462404	-0.452362	-0.55905	-0.239712
0.388	-0.420015	-0.592653	-0.456939	-0.333993	-0.287269	-0.227832	-0.00830139	-0.417676	-0.511411	-0.223398
0.389	-0.417337	-0.592333	-0.450133	-0.34409	-0.284542	-0.210345	0.0226169	-0.387607	-0.469747	-0.20807
0.39	-0.414631	-0.5887	-0.444388	-0.352748	-0.280269	-0.193298	0.0461083	-0.361818	-0.432748	-0.193994
0.391	-0.412079	-0.58259	-0.439407	-0.358945	-0.274809	-0.176873	0.0618446	-0.339274	-0.399734	-0.181402
0.392	-0.40994	-0.57487	-0.434861	-0.362307	-0.268634	-0.161348	0.0695747	-0.319415	-0.370624	-0.170167
0.393	-0.408303	-0.566314	-0.430591	-0.362898	-0.262232	-0.147023	0.069297	-0.302352	-0.345265	-0.160077
0.394	-0.407044	-0.557539	-0.426608	-0.361019	-0.255875	-0.134256	0.0614836	-0.287807	-0.323296	-0.151198
0.395	-0.405967	-0.54904	-0.423067	-0.357138	-0.249569	-0.12341	0.0469957	-0.274785	-0.304364	-0.143819
0.396	-0.40495	-0.541091	-0.420059	-0.351737	-0.243338	-0.114716	0.027058	-0.262396	-0.287948	-0.13824
0.397	-0.403905	-0.53371	-0.417401	-0.345207	-0.237384	-0.108204	0.0032348	-0.250335	-0.27331	-0.13455
0.398	-0.402705	-0.526896	-0.41488	-0.337976	-0.231991	-0.103793	-0.0231045	-0.238456	-0.259988	-0.132338
0.399	-0.401319	-0.520754	-0.41235	-0.330543	-0.227383	-0.101267	-0.0510125	-0.226524	-0.247915	-0.130807
0.4	-0.399836	-0.515353	-0.409465	-0.32332	-0.223537	-0.100223	-0.0793296	-0.214604	-0.236908	-0.129559
0.401	-0.398305	-0.510675	-0.405806	-0.316556	-0.220181	-0.100168	-0.106295	-0.203096	-0.226359	-0.128887
0.402	-0.396711	-0.506606	-0.401177	-0.31034	-0.217103	-0.100522	-0.130009	-0.192141	-0.215617	-0.128897
0.403	-0.395013	-0.502759	-0.395542	-0.304725	-0.214387	-0.100605	-0.14902	-0.181552	-0.204572	-0.128895
0.404	-0.393239	-0.498241	-0.388972	-0.299868	-0.212281	-0.0998836	-0.16239	-0.171396	-0.193513	-0.128091
0.405	-0.391496	-0.492037	-0.381719	-0.295942	-0.210874	-0.0980331	-0.169662	-0.162089	-0.182655	-0.126328
0.406	-0.389781	-0.483827	-0.374129	-0.29311	-0.210015	-0.0948689	-0.171238	-0.153857	-0.172241	-0.12375
0.407	-0.3879	-0.474097	-0.366415	-0.291428	-0.209422	-0.0904841	-0.168528	-0.146449	-0.162649	-0.120449
0.408	-0.385582	-0.463666	-0.358519	-0.290668	-0.208847	-0.0852943	-0.163263	-0.139427	-0.154091	-0.116815
0.409	-0.38262	-0.453361	-0.3503	-0.290479	-0.208232	-0.0798969	-0.156675	-0.132698	-0.146549	-0.113485
0.41	-0.37901	-0.443902	-0.341837	-0.290651	-0.207614	-0.0748888	-0.149545	-0.12671	-0.140078	-0.110571
0.411	-0.374939	-0.435868	-0.333489	-0.291169	-0.206893	-0.0706804	-0.142717	-0.122028	-0.13504	-0.107701
0.412	-0.370584	-0.429619	-0.325802	-0.292124	-0.205926	-0.0673471	-0.136999	-0.118685	-0.131971	-0.104963
0.413	-0.366087	-0.425258	-0.319219	-0.293576	-0.204792	-0.0645855	-0.132638	-0.116168	-0.131199	-0.102897
0.414	-0.361645	-0.422695	-0.313728	-0.295435	-0.203717	-0.0620552	-0.129384	-0.114184	-0.132525	-0.101469
0.415	-0.357454	-0.421699	-0.309118	-0.297502	-0.202782	-0.0597278	-0.127018	-0.112737	-0.135294	-0.100137
0.416	-0.353646	-0.421957	-0.305403	-0.299596	-0.201893	-0.0576889	-0.125431	-0.111341	-0.138797	-0.0989327
0.417	-0.350219	-0.423067	-0.302661	-0.301488	-0.200906	-0.0559959	-0.124366	-0.109348	-0.14244	-0.098301
0.418	-0.347109	-0.424452	-0.300907	-0.302875	-0.199639	-0.0547719	-0.123556	-0.106946	-0.145556	-0.0980136
0.419	-0.344288	-0.425515	-0.300109	-0.303674	-0.197919	-0.0539698	-0.123007	-0.104706	-0.147528	-0.0972521
0.42	-0.34167	-0.425922	-0.2999	-0.304075	-0.195647	-0.0532126	-0.122874	-0.10242	-0.148193	-0.0957364
0.421	-0.339133	-0.425617	-0.299528	-0.304126	-0.19281	-0.0521412	-0.123172	-0.0993805	-0.1478	-0.0939971
0.422	-0.336635	-0.424592	-0.29833	-0.30355	-0.189427	-0.050739	-0.123659	-0.0956212	-0.146413	-0.0924275
0.423	-0.33413	-0.422817	-0.296055	-0.302004	-0.185577	-0.0492514	-0.12411	-0.0919509	-0.143727	-0.0908887
0.424	-0.331511	-0.420337	-0.29287	-0.299455	-0.18153	-0.0480173	-0.124609	-0.0887507	-0.139727	-0.0893861
0.425	-0.328645	-0.417192	-0.289265	-0.296281	-0.177758	-0.0474	-0.125285	-0.0856697	-0.135022	-0.0883404
0.426	-0.325438	-0.413343	-0.285791	-0.292898	-0.174739	-0.0476789	-0.12602	-0.0826537	-0.130164	-0.0879455
0.427	-0.321892	-0.408868	-0.282837	-0.289346	-0.172738	-0.0490747	-0.126636	-0.080315	-0.125098	-0.0879969
0.428	-0.318091	-0.404063	-0.280643	-0.285332	-0.17164	-0.0518323	-0.127054	-0.0789384	-0.11972	-0.0885867
0.429	-0.314145	-0.399145	-0.279853	-0.28077	-0.171024	-0.055982	-0.127306	-0.0780204	-0.114465	-0.0900285
0.43	-0.310105	-0.394126	-0.282233	-0.27605	-0.170515	-0.0611343	-0.127569	-0.0771452	-0.109812	-0.0920601
0.431	-0.305952	-0.389066	-0.289759	-0.271618	-0.169959	-0.0667571	-0.128138	-0.0764386	-0.105657	-0.0941238
0.432	-0.301629	-0.384122	-0.302602	-0.267817	-0.169333	-0.0725286	-0.129205	-0.0759501	-0.101668	-0.0961291
0.433	-0.296993	-0.379308	-0.318588	-0.265063	-0.168705	-0.0782531	-0.130653	-0.0755217	-0.0977386	-0.0980964
0.434	-0.291845	-0.374495	-0.334233	-0.263572	-0.168144	-0.0835781	-0.132063	-0.0753481	-0.0938134	-0.099527
0.435	-0.286125	-0.369661	-0.346022	-0.2631	-0.167706	-0.0879694	-0.132958	-0.0758165	-0.0899688	-0.0998368
0.436	-0.279984	-0.364901	-0.351203	-0.263275	-0.167433	-0.0909862	-0.133013	-0.0767844	-0.0867074	-0.099058
0.437	-0.273614	-0.360293	-0.34805	-0.263868	-0.167197	-0.0925238	-0.132094	-0.0777133	-0.0845706	-0.0975574
0.438	-0.267202	-0.355856	-0.336001	-0.264723	-0.166699	-0.0927679	-0.130311	-0.0784407	-0.083534	-0.0954331
0.439	-0.260952	-0.351596	-0.315696	-0.265692	-0.165638	-0.0919785	-0.127952	-0.0792892	-0.0831945	-0.0928746
0.44	-0.255023	-0.347459	-0.288864	-0.266549	-0.163863	-0.0903483	-0.125389	-0.0804978	-0.0834102	-0.0906726
0.441	-0.249504	-0.343262	-0.257981	-0.266821	-0.161375	-0.0881678	-0.123073	-0.0818993	-0.0842253	-0.0894319
0.442	-0.244453	-0.338939	-0.225811	-0.265724	-0.158261	-0.0860118	-0.121484	-0.0832576	-0.0854637	-0.0887901
0.443	-0.239827	-0.334643	-0.19526	-0.262361	-0.15474	-0.0844098	-0.120937	-0.0846208	-0.0869462	-0.0882225
0.444	-0.235406	-0.330448	-0.169118	-0.256176	-0.151124	-0.0834512	-0.121388	-0.0861669	-0.0886688	-0.0878484
0.445	-0.230967	-0.326347	-0.149266	-0.2472	-0.147682	-0.0828937	-0.122427	-0.0878782	-0.0904241	-0.0878282
0.446	-0.226372	-0.322452	-0.136086	-0.235929	-0.144651	-0.0824639	-0.123404	-0.0894658	-0.0917724	-0.0877533
0.447	-0.221496	-0.318846	-0.128722	-0.223311	-0.142212	-0.0820386	-0.12382	-0.0907409	-0.0926326	-0.0872455
0.448	-0.216345	-0.315438	-0.125878	-0.210907	-0.140326	-0.0815799	-0.123677	-0.0919073	-0.0934062	-0.08665
0.449	-0.211141	-0.312194	-0.126387	-0.20072	-0.13869	-0.0808651	-0.123231	-0.0931164	-0.0942967	-0.0865343
0.45	-0.206128	-0.30924	-0.129206	-0.194698	-0.136974	-0.0795497	-0.122665	-0.0938169	-0.0949589	-0.0869058
0.451	-0.201495	-0.30662	-0.133345	-0.194292	-0.135006	-0.0775066	-0.122086	-0.0931254	-0.095051	-0.0874871
0.452	-0.197374	-0.30415	-0.137964	-0.200127	-0.132722	-0.0748284	-0.121604	-0.0910264	-0.0946615	-0.0882369
0.453	-0.193713	-0.30156	-0.142358	-0.211915	-0.130153	-0.0716677	-0.121458	-0.088389	-0.0939926	-0.0889564
0.454	-0.190383	-0.298644	-0.145903	-0.228735	-0.127478	-0.0681333	-0.121822	-0.0855877	-0.0930428	-0.0889621
0.455	-0.187288	-0.295292	-0.148178	-0.249017	-0.124868	-0.0642233	-0.122426	-0.0822405	-0.0918193	-0.0878723
0.456	-0.184291	-0.29151	-0.149088	-0.270343	-0.122275	-0.0599601	-0.122686	-0.0784432	-0.0906423	-0.0861735
0.457	-0.181219	-0.287333	-0.148798	-0.289945	-0.119469	-0.0554833	-0.122176	-0.0750635	-0.0900097	-0.0844603
0.458	-0.177869	-0.282833	-0.147641	-0.305468	-0.116288	-0.0509298	-0.120762	-0.0726445	-0.0902274	-0.0827916
0.459	-0.174112	-0.278203	-0.145997	-0.31528	-0.112841	-0.0463849	-0.118345	-0.0708182	-0.0912056	-0.0812019
0.46	-0.169993	-0.27362	-0.144121	-0.318508	-0.109426	-0.0419835	-0.114855	-0.0690892	-0.0925976	-0.0801161
0.461	-0.165658	-0.269104	-0.142166	-0.315014	-0.106281	-0.0379538	-0.110532	-0.0675347	-0.0941053	-0.0797692
0.462	-0.161253	-0.264624	-0.14018	-0.305429	-0.103407	-0.0346158	-0.10581	-0.0661676	-0.0956079	-0.0797
0.463	-0.156863	-0.26032	-0.138081	-0.291113	-0.100679	-0.0323712	-0.100988	-0.0643995	-0.0972435	-0.0793022
0.464	-0.152545	-0.256581	-0.135803	-0.273778	-0.0981926	-0.0315487	-0.096332	-0.0618831	-0.0992401	-0.0786022
0.465	-0.148403	-0.253755	-0.133364	-0.255036	-0.0962078	-0.0322284	-0.0922507	-0.0591872	-0.101498	-0.0779554
0.466	-0.144545	-0.251843	-0.130949	-0.236134	-0.094731	-0.0340979	-0.0890834	-0.0570816	-0.103723	-0.0771856
0.467	-0.141012	-0.250566	-0.128796	-0.217916	-0.0934803	-0.036514	-0.0867946	-0.0557566	-0.10585	-0.0759161
0.468	-0.137801	-0.24955	-0.126893	-0.20088	-0.0921564	-0.0389125	-0.0850819	-0.055121	-0.107916	-0.0744236
0.469	-0.134902	-0.248395	-0.12493	-0.185346	-0.0906149	-0.040892	-0.0837653	-0.0553029	-0.109665	-0.073001
0.47	-0.132277	-0.246758	-0.122544	-0.171591	-0.0888476	-0.0420096	-0.082833	-0.0561967	-0.110623	-0.0711559
0.471	-0.129822	-0.244333	-0.119628	-0.159755	-0.0868071	-0.041887	-0.0821194	-0.0569356	-0.110549	-0.0684418
0.472	-0.127432	-0.240833	-0.116405	-0.149748	-0.0844491	-0.0403825	-0.0812317	-0.0566966	-0.109539	-0.0651296
0.473	-0.125069	-0.236152	-0.113213	-0.141339	-0.0819729	-0.0376934	-0.0798537	-0.0556406	-0.10761	-0.0614619
0.474	-0.122662	-0.23077	-0.110295	-0.134257	-0.0797424	-0.0343166	-0.077963	-0.0543498	-0.104568	-0.0571654
0.475	-0.120096	-0.226075	-0.107773	-0.128157	-0.0779627	-0.0307021	-0.0756387	-0.0527929	-0.100454	-0.0520611
0.476	-0.117274	-0.223624	-0.10578	-0.122611	-0.0765792	-0.0270392	-0.0728319	-0.0504938	-0.0956786	-0.0465137
0.477	-0.114063	-0.223859	-0.104495	-0.117341	-0.0754678	-0.023221	-0.0695953	-0.0474224	-0.0905166	-0.0409832
0.478	-0.110386	-0.225935	-0.103915	-0.112307	-0.0745293	-0.0187572	-0.0662964	-0.0440336	-0.084835	-0.0355631
0.479	-0.106359	-0.228421	-0.103751	-0.107582	-0.0736689	-0.0131087	-0.0633635	-0.0405688	-0.0785287	-0.0301928
0.48	-0.102185	-0.22996	-0.103771	-0.103401	-0.072886	-0.00628282	-0.0610283	-0.0370035	-0.0718273	-0.0249391
0.481	-0.0980695	-0.229625	-0.103942	-0.100157	-0.0722289	0.00121111	-0.0592732	-0.0335425	-0.0649844	-0.0200065
0.482	-0.0942111	-0.226935	-0.10419	-0.0980479	-0.071592	0.00891959	-0.0579038	-0.0305347	-0.0580356	-0.0157299
0.483	-0.0907638	-0.221777	-0.10429	-0.096758	-0.0707505	0.0164897	-0.0568256	-0.0280191	-0.0509611	-0.0124683
0.484	-0.0878152	-0.214401	-0.103986	-0.0955549	-0.0695468	0.023322	-0.0561185	-0.0258241	-0.0438796	-0.0103992
0.485	-0.0854759	-0.205437	-0.103211	-0.0937882	-0.0679148	0.028684	-0.0557025	-0.0240356	-0.0370157	-0.00936782
0.486	-0.0839285	-0.195615	-0.102118	-0.0912693	-0.0658374	0.0321051	-0.0551694	-0.0230112	-0.0306078	-0.00881034
0.487	-0.0832727	-0.185388	-0.100914	-0.0882424	-0.0633175	0.033576	-0.0540535	-0.0227952	-0.0248253	-0.00787361
0.488	-0.0834273	-0.175032	-0.0998029	-0.0851938	-0.0603901	0.0333685	-0.0522112	-0.0228052	-0.0196717	-0.00593657
0.489	-0.0842104	-0.164816	-0.0989918	-0.0826848	-0.0572259	0.0317883	-0.049814	-0.0223425	-0.0149841	-0.00302942
0.49	-0.0854371	-0.155011	-0.0985616	-0.0811584	-0.0540248	0.0292603	-0.0470021	-0.0211209	-0.0105888	0.000592985
0.491	-0.0869023	-0.145878	-0.0983663	-0.0808749	-0.0507324	0.0262892	-0.0437756	-0.0192256	-0.00657397	0.00497278
0.492	-0.0883421	-0.137616	-0.0982125	-0.0819043	-0.0471425	0.0230469	-0.0401509	-0.0169255	-0.0032315	0.0100838
0.493	-0.0895604	-0.130413	-0.09818	-0.0838834	-0.0432355	0.0192382	-0.0363222	-0.0145971	-0.000607511	0.0153628
0.494	-0.0905429	-0.124557	-0.0985835	-0.0860946	-0.0391823	0.0145605	-0.032705	-0.0126461	0.00160115	0.0201841
0.495	-0.0914832	-0.120358	-0.0996553	-0.0879809	-0.0351618	0.00907114	-0.029738	-0.0113899	0.00375992	0.0243826
0.496	-0.0926268	-0.117965	-0.101408	-0.0891761	-0.0314242	0.0030076	-0.0277541	-0.0108921	0.00604577	0.0277055
0.497	-0.093984	-0.117343	-0.103667	-0.0892147	-0.0284504	-0.00334846	-0.027106	-0.0108819	0.00830919	0.0294614
0.498	-0.0954115	-0.118276	-0.106135	-0.0877752	-0.0267503	-0.00955332	-0.0280231	-0.0110241	0.0101923	0.0293642
0.499	-0.0967681	-0.120344	-0.108476	-0.0849263	-0.0265034	-0.015037	-0.0299594	-0.0112494	0.0114199	0.0280047
0.5	-0.0978426	-0.123173	-0.110339	-0.0809388	-0.0275523	-0.0192594	-0.0310614	-0.0115266	0.0119793	0.0261685
0.501	-0.098421	-0.126611	-0.111385	-0.0761839	-0.0296402	-0.0218171	-0.0287239	-0.0113311	0.0119705	0.0242735
0.502	-0.0984173	-0.130492	-0.11141	-0.071073	-0.0325638	-0.0225127	-0.0209083	-0.00993868	0.0112835	0.0225716
0.503	-0.0979084	-0.134491	-0.110557	-0.0659176	-0.0361785	-0.0214024	-0.00688078	-0.00725733	0.00968635	0.0213801
0.504	-0.0970965	-0.138314	-0.10931	-0.0608945	-0.0403005	-0.018752	0.012568	-0.00366971	0.00705304	0.0207455
0.505	-0.0962152	-0.141817	-0.108149	-0.056045	-0.0445906	-0.0149164	0.0348979	0.000622012	0.00325137	0.0202592
0.506	-0.0953854	-0.144868	-0.107338	-0.0513398	-0.0486317	-0.010289	0.0562967	0.00538968	-0.00184244	0.0196878
0.507	-0.0945988	-0.147297	-0.106928	-0.0469011	-0.052149	-0.00531523	0.0733466	0.00997169	-0.00809427	0.0193712
0.508	-0.0938782	-0.148995	-0.106846	-0.0430674	-0.0550484	-0.000438438	0.0843422	0.0137465	-0.0151059	0.0194815
0.509	-0.0932361	-0.14992	-0.106999	-0.040163	-0.0573805	0.00397967	0.0890076	0.0167481	-0.0225148	0.0195003
0.51	-0.0926206	-0.150072	-0.107269	-0.0383172	-0.0593203	0.00770602	0.0878339	0.0193503	-0.0300432	0.0189678
0.511	-0.0920668	-0.149561	-0.107514	-0.0374952	-0.0610095	0.0106899	0.0818856	0.0216275	-0.0372197	0.0180474
0.512	-0.0917082	-0.148706	-0.107561	-0.0376075	-0.0624257	0.0130423	0.0725329	0.0235032	-0.0434566	0.0170693
0.513	-0.0915983	-0.147914	-0.10717	-0.0385113	-0.0634982	0.0148492	0.0608666	0.0252905	-0.0484417	0.0161032
0.514	-0.0916529	-0.147499	-0.106084	-0.0399918	-0.0642921	0.0159996	0.0473517	0.0273963	-0.0521693	0.0151109
0.515	-0.0917747	-0.147604	-0.104052	-0.0419075	-0.064994	0.0163523	0.0323588	0.0295908	-0.0546712	0.0142464
0.516	-0.0918553	-0.148165	-0.100905	-0.0442131	-0.0658214	0.0159464	0.0167537	0.0312456	-0.0560422	0.0137604
0.517	-0.0917672	-0.149013	-0.0966492	-0.0468855	-0.066957	0.0147997	0.00162979	0.0322162	-0.0565308	0.0137282
0.518	-0.0914154	-0.149948	-0.091458	-0.0500114	-0.0684894	0.0127677	-0.0122341	0.0329381	-0.0564766	0.0140705
0.519	-0.0906751	-0.150749	-0.0855961	-0.0536917	-0.0703435	0.00986972	-0.0245524	0.0335124	-0.0563561	0.0146015
0.52	-0.0894422	-0.151291	-0.0793052	-0.057724	-0.0721898	0.00653256	-0.0352512	0.0333938	-0.0566564	0.0149891
0.521	-0.0877454	-0.151526	-0.0728142	-0.0617415	-0.0735825	0.00332299	-0.0441319	0.0324512	-0.0575172	0.0148638
0.522	-0.085698	-0.151401	-0.0663633	-0.0659157	-0.0742946	0.000518548	-0.0509511	0.031379	-0.0586371	0.0140937
0.523	-0.0834366	-0.150862	-0.0602319	-0.0709512	-0.0743987	-0.00196637	-0.0556324	0.0306925	-0.0597022	0.0127909
0.524	-0.0810966	-0.149798	-0.0547563	-0.0770968	-0.0740796	-0.00420337	-0.0582188	0.0302494	-0.0607537	0.0108881
0.525	-0.0788262	-0.148119	-0.0502352	-0.0837314	-0.0734668	-0.00609027	-0.058675	0.0299294	-0.0618204	0.00824932
0.526	-0.0767511	-0.145895	-0.0469736	-0.0898544	-0.0725758	-0.00772752	-0.0570817	0.0300986	-0.0625215	0.00522472
0.527	-0.0748527	-0.143226	-0.0453387	-0.0945981	-0.071377	-0.00941164	-0.0540459	0.0309522	-0.062429	0.00227043
0.528	-0.0729718	-0.140184	-0.0456066	-0.0974145	-0.0698836	-0.0112181	-0.0503032	0.0316954	-0.0615501	-0.000806572
0.529	-0.0709723	-0.136946	-0.0479053	-0.0980808	-0.0681766	-0.0130844	-0.046091	0.0310281	-0.0601586	-0.00437188
0.53	-0.068874	-0.133738	-0.0522083	-0.0967196	-0.0664083	-0.0150515	-0.0415084	0.02832	-0.0583688	-0.00814661
0.531	-0.066834	-0.130645	-0.0582166	-0.0937307	-0.0647422	-0.0171668	-0.0369709	0.0237731	-0.0562003	-0.0117079
0.532	-0.0650199	-0.127646	-0.065365	-0.0895526	-0.0632938	-0.0194863	-0.032725	0.0176561	-0.0537497	-0.0152199
0.533	-0.0634733	-0.124833	-0.0729706	-0.0845023	-0.0621362	-0.0222761	-0.0283812	0.0100999	-0.0509161	-0.0189981
0.534	-0.0621016	-0.122417	-0.0803877	-0.0789167	-0.0613143	-0.0259187	-0.023514	0.00158778	-0.047405	-0.0229354
0.535	-0.0608344	-0.120405	-0.0870931	-0.0734684	-0.0607374	-0.0304516	-0.0185861	-0.00717893	-0.0430736	-0.0269654
0.536	-0.0597823	-0.118485	-0.0927007	-0.0690697	-0.0600826	-0.0354407	-0.0147933	-0.01587	-0.0380273	-0.0316411
0.537	-0.0591436	-0.116119	-0.0970305	-0.0662259	-0.0590673	-0.0403707	-0.0128543	-0.0243548	-0.0326466	-0.0376667
0.538	-0.0590051	-0.112352	-0.100195	-0.0647406	-0.0577093	-0.0449056	-0.0124521	-0.0321732	-0.0273071	-0.0451951
0.539	-0.0592785	-0.105759	-0.102612	-0.0641062	-0.0561842	-0.0489216	-0.0130833	-0.0387749	-0.0220134	-0.053849
0.54	-0.0597	-0.0950929	-0.104916	-0.0639302	-0.0546028	-0.0525069	-0.0147398	-0.0442178	-0.0168215	-0.0630718
0.541	-0.0599961	-0.0801235	-0.107898	-0.0640017	-0.0529687	-0.0558681	-0.0174032	-0.0490352	-0.0123591	-0.0724726
0.542	-0.0600792	-0.0618722	-0.112714	-0.06414	-0.051336	-0.0591818	-0.0205743	-0.0534206	-0.00932324	-0.0819261
0.543	-0.0599628	-0.0423281	-0.121223	-0.064163	-0.0498452	-0.0624974	-0.0236723	-0.0571163	-0.00773418	-0.0911321
0.544	-0.0595398	-0.0240922	-0.135859	-0.0638817	-0.0484756	-0.0656937	-0.0263629	-0.0600845	-0.00723396	-0.0994112
0.545	-0.0586416	-0.00984391	-0.158693	-0.0631066	-0.0470285	-0.0685452	-0.0283132	-0.0627331	-0.00783666	-0.106224
0.546	-0.0573227	-0.00158049	-0.190182	-0.0618619	-0.0454534	-0.0708934	-0.0291827	-0.0652794	-0.00967142	-0.111596
0.547	-0.0558654	-0.000211125	-0.228555	-0.0604557	-0.0439027	-0.0726234	-0.0290229	-0.0673396	-0.0122254	-0.115955
0.548	-0.0545759	-0.00565062	-0.270243	-0.0592393	-0.0425712	-0.0735546	-0.0282806	-0.0686977	-0.0146967	-0.119678
0.549	-0.0536093	-0.0170017	-0.310959	-0.0584428	-0.0416786	-0.0735184	-0.0273075	-0.0701104	-0.0169116	-0.122786
0.55	-0.0529277	-0.0327159	-0.347058	-0.0581652	-0.0413105	-0.0724343	-0.0261232	-0.072472	-0.0191669	-0.125013
0.551	-0.0524327	-0.0509762	-0.376461	-0.0583663	-0.0412842	-0.0704445	-0.0247348	-0.0756584	-0.0214927	-0.126137
0.552	-0.0520399	-0.0701452	-0.398426	-0.0589	-0.0413279	-0.068029	-0.0233534	-0.0791602	-0.0236976	-0.126157
0.553	-0.0516295	-0.0888586	-0.412679	-0.0595686	-0.0412347	-0.0657783	-0.0221115	-0.0830292	-0.0257262	-0.125228
0.554	-0.0510611	-0.1059	-0.418916	-0.060189	-0.0408266	-0.0640955	-0.0209196	-0.087128	-0.0274222	-0.123807
0.555	-0.0503203	-0.120238	-0.417042	-0.0606447	-0.039902	-0.0631281	-0.0197806	-0.0904563	-0.0283685	-0.122558
0.556	-0.0494953	-0.131253	-0.407539	-0.0608559	-0.0383671	-0.0628472	-0.0189775	-0.0922982	-0.0284111	-0.12172
0.557	-0.0485858	-0.138884	-0.391347	-0.060823	-0.0364045	-0.0632365	-0.0187301	-0.0931058	-0.0280466	-0.121144
0.558	-0.0475394	-0.143494	-0.369501	-0.0606499	-0.0343693	-0.0642913	-0.0187908	-0.0935214	-0.0280163	-0.121102
0.559	-0.0463301	-0.145517	-0.342919	-0.0603189	-0.0325779	-0.065725	-0.0186307	-0.0935012	-0.0286222	-0.122054
0.56	-0.0448946	-0.145267	-0.312463	-0.0596242	-0.0312808	-0.0669759	-0.0179536	-0.0929743	-0.0297552	-0.12356
0.561	-0.0431669	-0.143072	-0.279176	-0.0584958	-0.0306784	-0.0676708	-0.0168055	-0.0924008	-0.0314669	-0.124666
0.562	-0.0411691	-0.139439	-0.244368	-0.0570806	-0.0308086	-0.067906	-0.0152605	-0.0920743	-0.0338996	-0.125079
0.563	-0.0390438	-0.135026	-0.209443	-0.055447	-0.0315639	-0.0680183	-0.0133623	-0.0917268	-0.0368462	-0.124906
0.564	-0.0370181	-0.130445	-0.175673	-0.0535696	-0.0327744	-0.0682637	-0.011403	-0.0913004	-0.039948	-0.123861
0.565	-0.0352614	-0.126116	-0.144018	-0.0515591	-0.0341864	-0.0686586	-0.00979107	-0.0912536	-0.0431431	-0.121499
0.566	-0.0337647	-0.122316	-0.115197	-0.0495982	-0.0355052	-0.0688688	-0.00864218	-0.0916253	-0.0465517	-0.117785
0.567	-0.0323605	-0.11919	-0.0898272	-0.0478081	-0.0364933	-0.0683339	-0.00786015	-0.0915552	-0.0500636	-0.113033
0.568	-0.0309318	-0.116636	-0.0683035	-0.0463344	-0.0370793	-0.0666655	-0.00744376	-0.0902812	-0.0533808	-0.10755
0.569	-0.0295634	-0.114371	-0.0506862	-0.0452647	-0.0373542	-0.0637931	-0.00743025	-0.0879182	-0.0563124	-0.101541
0.57	-0.0283611	-0.112121	-0.0368342	-0.0444312	-0.0374356	-0.0598084	-0.007719	-0.0847547	-0.0586931	-0.0952068
0.571	-0.0273091	-0.109636	-0.0265304	-0.0435588	-0.0373471	-0.0550061	-0.00815732	-0.0805238	-0.0601805	-0.0886968
0.572	-0.0263513	-0.106682	-0.0194346	-0.0424599	-0.0369566	-0.0499382	-0.00865581	-0.0751001	-0.060398	-0.0822178
0.573	-0.0254492	-0.103169	-0.0150351	-0.0410022	-0.036022	-0.0450812	-0.00899955	-0.0694086	-0.0592853	-0.0762212
0.574	-0.0245806	-0.0991159	-0.0127983	-0.0391346	-0.0344171	-0.0405881	-0.00826003	-0.064586	-0.0573183	-0.071084
0.575	-0.023768	-0.0944562	-0.0123297	-0.0369951	-0.0323391	-0.0365661	-0.00482517	-0.0607073	-0.0552764	-0.0667296
0.576	-0.0230974	-0.0891042	-0.0133176	-0.0348577	-0.0302152	-0.033305	0.00207794	-0.0575869	-0.0536577	-0.0629278
0.577	-0.0226146	-0.0832467	-0.0153768	-0.0328621	-0.0284168	-0.031039	0.0114133	-0.0559085	-0.0524788	-0.0597842
0.578	-0.022304	-0.0773308	-0.0179737	-0.0309917	-0.0270285	-0.0298186	0.0212363	-0.0561314	-0.0516979	-0.0575088
0.579	-0.0221524	-0.0717691	-0.0205623	-0.0292604	-0.0259579	-0.0296429	0.0297202	-0.0574042	-0.051612	-0.0559905
0.58	-0.02205	-0.0667921	-0.0228156	-0.0276749	-0.0251967	-0.0303267	0.0355003	-0.0588295	-0.0525973	-0.0549812
0.581	-0.021827	-0.0625334	-0.024567	-0.0263222	-0.0248089	-0.0314182	0.037911	-0.0605188	-0.0544949	-0.054256
0.582	-0.0214402	-0.0590989	-0.025685	-0.0254629	-0.0248205	-0.0325193	0.0370224	-0.0624085	-0.0566914	-0.0534188
0.583	-0.0209717	-0.0564694	-0.0261665	-0.0252738	-0.025143	-0.0334355	0.0333075	-0.0637	-0.0588799	-0.0521789
0.584	-0.0205497	-0.0544726	-0.0261027	-0.0256229	-0.0255693	-0.0340043	0.0273818	-0.0643143	-0.0611762	-0.0508708
0.585	-0.0202607	-0.0529594	-0.0254733	-0.0262004	-0.0259211	-0.0340289	0.0198788	-0.0652132	-0.0634632	-0.0500039
0.586	-0.0200769	-0.0518721	-0.0241516	-0.0267975	-0.0260683	-0.0333925	0.0113044	-0.0667053	-0.0653686	-0.0495067
0.587	-0.0199364	-0.0511551	-0.0220906	-0.0273195	-0.0258848	-0.032122	0.00214184	-0.0680685	-0.0670373	-0.0490485
0.588	-0.019815	-0.0507787	-0.0193649	-0.0277218	-0.0254039	-0.0303096	-0.0068977	-0.0691111	-0.0691711	-0.048584
0.589	-0.0196888	-0.0507566	-0.0161558	-0.0280759	-0.0248017	-0.0279793	-0.0149031	-0.0702819	-0.0719944	-0.0479937
0.59	-0.0195968	-0.0510081	-0.0127991	-0.028407	-0.02418	-0.0250941	-0.0210812	-0.0712584	-0.0749806	-0.0467462
0.591	-0.0196974	-0.0513699	-0.00969666	-0.0285468	-0.0235547	-0.0217354	-0.0250355	-0.0712742	-0.0778509	-0.0444585
0.592	-0.0200838	-0.0517948	-0.00717015	-0.0283581	-0.0229345	-0.0181325	-0.0267262	-0.0705678	-0.0809302	-0.0413194
0.593	-0.0205991	-0.0523279	-0.00542335	-0.0278388	-0.0223301	-0.0145645	-0.0262135	-0.0699778	-0.08424	-0.0378051
0.594	-0.0208831	-0.0529144	-0.00452223	-0.0270258	-0.0217483	-0.0113317	-0.0236241	-0.0696753	-0.0871708	-0.0343603
0.595	-0.0205585	-0.0534456	-0.00449372	-0.0260378	-0.0211551	-0.00863852	-0.0194096	-0.069594	-0.0895108	-0.0311739
0.596	-0.0194511	-0.0539544	-0.00545672	-0.0251396	-0.0204293	-0.00644308	-0.0144079	-0.0703758	-0.0918149	-0.0281749
0.597	-0.0176993	-0.0545939	-0.00745512	-0.0246507	-0.0194602	-0.00455552	-0.00957474	-0.072671	-0.0943041	-0.0255287
0.598	-0.0156259	-0.055387	-0.0102673	-0.0247931	-0.0183363	-0.00291401	-0.00575534	-0.0761216	-0.0963818	-0.0239277
0.599	-0.0135127	-0.0561777	-0.0134823	-0.025652	-0.0172551	-0.00161978	-0.00360985	-0.0799652	-0.0976236	-0.0239062
0.6	-0.0115306	-0.0568427	-0.0166455	-0.0272854	-0.0163002	-0.000757884	-0.00329514	-0.083887	-0.098323	-0.0252887
0.601	-0.00979147	-0.0573883	-0.0193823	-0.0297223	-0.0155177	-0.000305739	-0.00412721	-0.0874146	-0.0986416	-0.0279081
0.602	-0.00835514	-0.0578728	-0.0214577	-0.0327542	-0.0150045	-5.52e-05	-0.00522118	-0.0894708	-0.0981665	-0.0320647
0.603	-0.00717936	-0.0582541	-0.0226956	-0.0359276	-0.0147434	0.000376894	-0.00648495	-0.0895073	-0.0968107	-0.0375778
0.604	-0.00613044	-0.058382	-0.0229903	-0.0388348	-0.0145239	0.00131133	-0.00826037	-0.0881058	-0.0952025	-0.0433501
0.605	-0.00514816	-0.0581745	-0.0225057	-0.0413529	-0.014141	0.00280725	-0.0102241	-0.0857947	-0.0937547	-0.0484185
0.606	-0.00435087	-0.0574793	-0.021604	-0.0434621	-0.0135278	0.00475252	-0.0114687	-0.0823667	-0.0923187	-0.0525064
0.607	-0.00389479	-0.0556178	-0.0204811	-0.0448851	-0.0126311	0.00702242	-0.0115498	-0.0777864	-0.0910245	-0.0554745
0.608	-0.00382393	-0.0515431	-0.0191275	-0.0452494	-0.0113819	0.00946158	-0.0107551	-0.0726696	-0.0904023	-0.0570761
0.609	-0.00404127	-0.0448918	-0.0175855	-0.0444541	-0.00985316	0.011812	-0.00934471	-0.0674683	-0.0904774	-0.0574265
0.61	-0.00434054	-0.0366069	-0.0159502	-0.0425983	-0.00820864	0.0136981	-0.00728099	-0.0622116	-0.09092	-0.0572204
0.611	-0.00457184	-0.0283854	-0.0142228	-0.0398134	-0.00643404	0.0146732	-0.0048349	-0.0571847	-0.092034	-0.0569958
0.612	-0.00480691	-0.0218475	-0.0124084	-0.0363224	-0.00438477	0.0143227	-0.00265025	-0.0528464	-0.0942966	-0.0567437
0.613	-0.00527365	-0.018068	-0.0105783	-0.0325123	-0.00218659	0.0124433	-0.00106285	-0.0491607	-0.0974075	-0.0565799
0.614	-0.00615464	-0.0174896	-0.00875964	-0.0288495	-0.000368809	0.00923887	0.000106169	-0.0457218	-0.100899	-0.0568936
0.615	-0.00743016	-0.0200849	-0.00694472	-0.0257508	0.000570832	0.00522246	0.00118433	-0.0424194	-0.104883	-0.0577246
0.616	-0.00883712	-0.0254104	-0.00506759	-0.0234779	0.000530546	0.000873191	0.00246977	-0.0395372	-0.109289	-0.058643
0.617	-0.0100449	-0.0326647	-0.00302695	-0.0220451	-0.000377572	-0.00342304	0.00424428	-0.0372735	-0.113135	-0.0592208
0.618	-0.0109022	-0.0409786	-0.00088255	-0.0212692	-0.00200753	-0.00722077	0.0064289	-0.0355475	-0.115514	-0.0593443
0.619	-0.0114816	-0.0496092	0.00120734	-0.0209156	-0.00422042	-0.0100738	0.00837353	-0.0342582	-0.116626	-0.0591255
0.62	-0.0119157	-0.0579556	0.00316172	-0.0208035	-0.00693427	-0.0117136	0.00943526	-0.0335405	-0.117025	-0.0586976
0.621	-0.0121776	-0.0656018	0.00485135	-0.0207143	-0.0100082	-0.0121081	0.00953621	-0.033801	-0.116592	-0.058162
0.622	-0.012104	-0.0722657	0.00594554	-0.0203352	-0.0131147	-0.0114949	0.00894306	-0.0353581	-0.115172	-0.05767
0.623	-0.0116326	-0.0776385	0.00604631	-0.0195437	-0.0157555	-0.0103683	0.00774993	-0.038137	-0.11341	-0.0574402
0.624	-0.0108468	-0.0813839	0.0049184	-0.0186035	-0.0175785	-0.00920482	0.00591975	-0.0419908	-0.11192	-0.0575851
0.625	-0.00988094	-0.0833262	0.00259519	-0.0179662	-0.0186896	-0.0082456	0.00363496	-0.0468211	-0.110349	-0.0578816
0.626	-0.00890481	-0.0835478	-0.000609359	-0.0178756	-0.0193889	-0.00762476	0.00115116	-0.0522175	-0.108152	-0.0578771
0.627	-0.00802546	-0.0823082	-0.00415048	-0.0182088	-0.0197386	-0.00750427	-0.00145519	-0.0576753	-0.105519	-0.0573459
0.628	-0.00727764	-0.0800046	-0.0073967	-0.0187287	-0.0196078	-0.00809027	-0.00398896	-0.0632157	-0.102759	-0.0564541
0.629	-0.00676805	-0.077067	-0.00985468	-0.0193124	-0.0190207	-0.00949441	-0.00596136	-0.0690465	-0.0996783	-0.0554333
0.63	-0.00658856	-0.0736234	-0.0113149	-0.019972	-0.0181868	-0.0114966	-0.00700934	-0.0745906	-0.0961852	-0.0543665
0.631	-0.00674771	-0.0695167	-0.0118107	-0.0208362	-0.0173332	-0.0137716	-0.00707694	-0.0787902	-0.092648	-0.0532845
0.632	-0.00729301	-0.0648296	-0.0114601	-0.0220072	-0.0166807	-0.0162707	-0.00633516	-0.0812364	-0.0891734	-0.0522825
0.633	-0.00824782	-0.0599888	-0.0104035	-0.023393	-0.0163161	-0.0190279	-0.00526339	-0.0820834	-0.0851813	-0.051527
0.634	-0.00943277	-0.0554611	-0.0088245	-0.0248027	-0.0161374	-0.0218331	-0.00440021	-0.0812361	-0.0803188	-0.0512202
0.635	-0.0105425	-0.0516243	-0.00682422	-0.0260912	-0.0160544	-0.024274	-0.0039059	-0.0785598	-0.0750896	-0.0515343
0.636	-0.0113917	-0.0486568	-0.00444895	-0.027179	-0.0160268	-0.0259985	-0.00367983	-0.0746716	-0.0698843	-0.052422
0.637	-0.011993	-0.0465496	-0.00199507	-0.0280292	-0.0159043	-0.0269348	-0.00371504	-0.0705336	-0.0644746	-0.053524
0.638	-0.0124799	-0.0452458	5.78e-06	-0.0286049	-0.0154528	-0.0272545	-0.00392751	-0.0664073	-0.0589472	-0.0544359
0.639	-0.0129568	-0.0445888	0.00117095	-0.0288882	-0.014525	-0.0271177	-0.00395571	-0.0622929	-0.0540424	-0.0550098
0.64	-0.0133739	-0.0443165	0.00141939	-0.0288874	-0.0131099	-0.0265262	-0.00346533	-0.0588976	-0.0502541	-0.0552545
0.641	-0.0135994	-0.0443361	0.000840559	-0.0285309	-0.0112667	-0.0254601	-0.00236345	-0.0568414	-0.0474538	-0.0550068
0.642	-0.013547	-0.0447909	-0.000418868	-0.0277445	-0.00909426	-0.0239718	-0.000712286	-0.0556642	-0.0456378	-0.054034
0.643	-0.0132021	-0.0457362	-0.00207498	-0.0267421	-0.00670668	-0.0222025	0.00139441	-0.0546718	-0.0451898	-0.0525617
0.644	-0.0125673	-0.0470504	-0.00364485	-0.0259557	-0.00417146	-0.0205243	0.0038519	-0.0539103	-0.0462029	-0.0512948
0.645	-0.0116942	-0.0485481	-0.00474707	-0.0256339	-0.00165121	-0.0193905	0.00643372	-0.0536195	-0.0482401	-0.0507394
0.646	-0.0108177	-0.0500232	-0.00533802	-0.0258241	0.000496992	-0.0190028	0.00884308	-0.0534643	-0.0507582	-0.0508382
0.647	-0.0102016	-0.0513643	-0.005638	-0.026674	0.00203918	-0.0193473	0.0108378	-0.0531814	-0.0532601	-0.0514886
0.648	-0.00991391	-0.0525288	-0.00601067	-0.0284081	0.00304449	-0.0202804	0.0120807	-0.0533968	-0.0553331	-0.0528492
0.649	-0.0099457	-0.0534317	-0.00675658	-0.0309681	0.00365786	-0.0215508	0.0121179	-0.0546039	-0.0568818	-0.0548699
0.65	-0.0103962	-0.0539756	-0.00786837	-0.0338681	0.00394329	-0.0229389	0.0106814	-0.0560544	-0.0580712	-0.057163
0.651	-0.0114247	-0.0541038	-0.00899751	-0.0365997	0.0039503	-0.0242723	0.00779013	-0.0568664	-0.0589693	-0.0593989
0.652	-0.0130366	-0.0538542	-0.00972694	-0.0389552	0.00377213	-0.0253843	0.00365107	-0.0571735	-0.0593833	-0.0614359
0.653	-0.0149709	-0.053392	-0.00976467	-0.040824	0.0034801	-0.0261603	-0.00137636	-0.0571443	-0.0592109	-0.06313
0.654	-0.0168675	-0.0528704	-0.00884093	-0.0421287	0.00309366	-0.026556	-0.00689414	-0.0561432	-0.0587098	-0.0642085
0.655	-0.0184775	-0.0522731	-0.0067749	-0.0429183	0.00267069	-0.02656	-0.0126072	-0.0538421	-0.0581651	-0.0643812
0.656	-0.0196403	-0.0515634	-0.00372393	-0.0432332	0.0023158	-0.0261749	-0.018329	-0.0509927	-0.0577212	-0.0635713
0.657	-0.0203405	-0.0508533	-0.000104493	-0.0430812	0.00206154	-0.0254375	-0.023605	-0.0482348	-0.0575958	-0.0619775
0.658	-0.0208303	-0.0503371	0.0036496	-0.042522	0.00182157	-0.0244504	-0.0271894	-0.0453954	-0.0579716	-0.0599297
0.659	-0.021368	-0.0502184	0.00709525	-0.0416478	0.00147973	-0.0233655	-0.027575	-0.0425813	-0.0587183	-0.0577303
0.66	-0.0218911	-0.0506691	0.0098661	-0.0405482	0.00100697	-0.0222094	-0.0242711	-0.0405312	-0.0597213	-0.0555785
0.661	-0.0220978	-0.0517821	0.0118013	-0.039264	0.000457039	-0.0207487	-0.0181298	-0.0394389	-0.0613381	-0.0535426
0.662	-0.0217657	-0.0534956	0.0127501	-0.0377756	-0.000162611	-0.0187491	-0.0106719	-0.0387018	-0.0638973	-0.0514948
0.663	-0.0209195	-0.0555524	0.0125993	-0.0360718	-0.000953479	-0.0162903	-0.00338947	-0.0380978	-0.0671399	-0.0491318
0.664	-0.0197499	-0.0576628	0.0115142	-0.0342336	-0.00204999	-0.0136847	0.00264936	-0.0380659	-0.0707533	-0.0462308
0.665	-0.0184364	-0.0597087	0.00980408	-0.0324204	-0.00347183	-0.0112748	0.00691856	-0.0387449	-0.0748696	-0.0427798
0.666	-0.0170839	-0.061729	0.00779049	-0.0307407	-0.00501233	-0.00940525	0.00930365	-0.0397795	-0.0795471	-0.0388047
0.667	-0.0158142	-0.0636712	0.00581343	-0.0291957	-0.00636584	-0.00838504	0.00979471	-0.0409827	-0.0842747	-0.0343419
0.668	-0.0147622	-0.065259	0.00416487	-0.0278038	-0.00737831	-0.00832832	0.00833501	-0.042278	-0.0884128	-0.02965
0.669	-0.0140685	-0.0662417	0.00300146	-0.0266786	-0.00810473	-0.00914144	0.00490685	-0.0432133	-0.0916307	-0.0253238
0.67	-0.0139419	-0.0665151	0.00226846	-0.0259151	-0.00868469	-0.010668	-0.000298348	-0.0432498	-0.0935729	-0.0219782
0.671	-0.0144605	-0.0660468	0.00179971	-0.0254995	-0.00916553	-0.0128077	-0.00671513	-0.0423726	-0.0937339	-0.019823
0.672	-0.0154082	-0.0649672	0.00143775	-0.0252247	-0.00945649	-0.0156038	-0.0135976	-0.041031	-0.0920187	-0.0188816
0.673	-0.0164314	-0.0634456	0.00101896	-0.0246653	-0.0094026	-0.0191807	-0.0204116	-0.0395025	-0.0888315	-0.0192237
0.674	-0.0172748	-0.061501	0.000385027	-0.0234283	-0.00881407	-0.0235458	-0.0268051	-0.0376852	-0.0843572	-0.0206616
0.675	-0.0179254	-0.0591347	-0.000596883	-0.0213877	-0.00762025	-0.0284697	-0.0323666	-0.0356834	-0.0785504	-0.0228327
0.676	-0.0184501	-0.0564703	-0.00198316	-0.0186654	-0.00600726	-0.0336038	-0.0368381	-0.034019	-0.0719079	-0.0255393
0.677	-0.0187894	-0.0537751	-0.00364701	-0.0154738	-0.00431943	-0.0387519	-0.0403507	-0.0330736	-0.065282	-0.0285853
0.678	-0.0188365	-0.0513725	-0.00524559	-0.012078	-0.00298116	-0.0439285	-0.0429003	-0.0328202	-0.0590856	-0.0316873
0.679	-0.0185509	-0.0494877	-0.00640577	-0.00883981	-0.00240157	-0.0491909	-0.0440052	-0.0331532	-0.053325	-0.0348661
0.68	-0.0180546	-0.0482107	-0.00697967	-0.00614944	-0.00272428	-0.0544728	-0.043508	-0.0342178	-0.0482261	-0.0384254
0.681	-0.0176113	-0.0475409	-0.00690632	-0.00436559	-0.00381167	-0.0595143	-0.0420769	-0.0361414	-0.0444034	-0.0421677
0.682	-0.0173607	-0.0474559	-0.00599118	-0.00365734	-0.0055287	-0.0639265	-0.0403223	-0.0385138	-0.0421631	-0.04533
0.683	-0.0172389	-0.0479666	-0.00412879	-0.00395655	-0.00782651	-0.0673519	-0.038118	-0.0407946	-0.0410085	-0.0474299
0.684	-0.0171751	-0.0490604	-0.0014893	-0.00517653	-0.0105956	-0.0696098	-0.0352242	-0.0431542	-0.0403895	-0.0482169
0.685	-0.0171475	-0.0505863	0.00160435	-0.00724428	-0.0135464	-0.0706941	-0.0319173	-0.0459575	-0.0404723	-0.0472546
0.686	-0.0171219	-0.0522593	0.00478093	-0.0100474	-0.0162993	-0.0706757	-0.0285501	-0.0486315	-0.0414818	-0.0444989
0.687	-0.0170506	-0.0538027	0.00763624	-0.0133729	-0.0186076	-0.0696048	-0.0249871	-0.0502322	-0.0429311	-0.0405754
0.688	-0.0168905	-0.0550143	0.00979203	-0.0167977	-0.0203169	-0.0675675	-0.0209844	-0.0509152	-0.0441769	-0.0360468
0.689	-0.0166933	-0.0557696	0.0110913	-0.0198376	-0.0211942	-0.0648464	-0.0167711	-0.0515245	-0.0451522	-0.0311849
0.69	-0.0166068	-0.0560539	0.0116431	-0.0221278	-0.0209711	-0.0617913	-0.0128278	-0.0520213	-0.0460346	-0.0265136
0.691	-0.0166377	-0.0558646	0.0115525	-0.0233633	-0.0195143	-0.0585567	-0.00939876	-0.051787	-0.0465598	-0.0227228
0.692	-0.0166032	-0.0551096	0.0108609	-0.0231928	-0.0169712	-0.0551502	-0.00656508	-0.0509432	-0.046365	-0.0200048
0.693	-0.0163676	-0.0537084	0.00972805	-0.021091	-0.0136739	-0.051741	-0.00462118	-0.0499335	-0.0457203	-0.0180776
0.694	-0.015895	-0.0516342	0.00842793	-0.0165189	-0.00989945	-0.0487125	-0.00387777	-0.0484008	-0.0449706	-0.016851
0.695	-0.0151612	-0.0488676	0.00721447	-0.0096102	-0.00596572	-0.0462951	-0.00410083	-0.0457516	-0.0437512	-0.016525
0.696	-0.0141908	-0.0455077	0.00621337	-0.00133223	-0.00242395	-0.0444594	-0.00469809	-0.0424212	-0.0416682	-0.0170772
0.697	-0.0131029	-0.0419202	0.00536056	0.00717286	0.000163255	-0.0431652	-0.0053529	-0.0394379	-0.0391565	-0.0182355
0.698	-0.0121054	-0.0386869	0.00448512	0.014944	0.00150616	-0.0423885	-0.00615445	-0.0371569	-0.0369918	-0.0198571
0.699	-0.0114047	-0.0363178	0.00350102	0.0212778	0.0016278	-0.0419948	-0.00730382	-0.0354266	-0.0353651	-0.0220136
0.7	-0.01105	-0.0350342	0.00248484	0.025869	0.000894235	-0.0417149	-0.00883816	-0.0344754	-0.034059	-0.0247315
0.701	-0.0109699	-0.0347852	0.00167876	0.0287465	-0.000109029	-0.0412896	-0.0107341	-0.0346337	-0.0333434	-0.0277756
0.702	-0.0111246	-0.0352736	0.00139399	0.0301564	-0.000900078	-0.0406364	-0.013071	-0.0354476	-0.0338567	-0.0308915
0.703	-0.0115093	-0.0360977	0.00176569	0.0305091	-0.00125122	-0.0396871	-0.0158183	-0.036155	-0.0355652	-0.0340537
0.704	-0.0121259	-0.0370088	0.00276497	0.0302424	-0.00113678	-0.0382309	-0.0187999	-0.0368984	-0.0378072	-0.0371213
0.705	-0.0129409	-0.0378787	0.00436101	0.0297527	-0.000601104	-0.0361286	-0.0219101	-0.0382965	-0.04038	-0.039514
0.706	-0.0138279	-0.038584	0.0063904	0.0295211	0.000310994	-0.0334531	-0.0250105	-0.0400703	-0.0434	-0.0406117
0.707	-0.014638	-0.0391091	0.00850569	0.0301067	0.00136349	-0.0303566	-0.0277208	-0.0413816	-0.0463337	-0.0403551
0.708	-0.0151984	-0.0395354	0.0103543	0.0318602	0.00210316	-0.0269193	-0.0296214	-0.0424072	-0.0484237	-0.0391415
0.709	-0.0153087	-0.0398469	0.011642	0.0346781	0.00229913	-0.0233207	-0.0306614	-0.0442082	-0.0497346	-0.0374204
0.71	-0.0149757	-0.0399141	0.0121768	0.0380674	0.00208557	-0.020079	-0.031234	-0.047048	-0.050992	-0.035783
0.711	-0.0144404	-0.0396883	0.0119309	0.0414737	0.0016679	-0.0177406	-0.0318457	-0.0503404	-0.0525453	-0.034855
0.712	-0.0139113	-0.039303	0.0110521	0.0445612	0.0011889	-0.0164697	-0.0328018	-0.0540309	-0.0540948	-0.0347104
0.713	-0.0135108	-0.0389516	0.00985751	0.0471634	0.000729153	-0.0160877	-0.0341963	-0.0583246	-0.0556189	-0.0349209
0.714	-0.0132995	-0.0387004	0.00865651	0.0490786	0.000372828	-0.0162744	-0.035947	-0.062529	-0.0576171	-0.0352465
0.715	-0.0132155	-0.0384585	0.00752782	0.0501184	0.000229181	-0.0167006	-0.0377629	-0.0657882	-0.0600567	-0.0358171
0.716	-0.0131624	-0.0381046	0.00643379	0.0502875	0.000275625	-0.017105	-0.0390948	-0.0682485	-0.0621394	-0.0366405
0.717	-0.0131156	-0.0375825	0.00547845	0.0497684	0.000274063	-0.0173196	-0.0392124	-0.0701197	-0.0633593	-0.0372878
0.718	-0.0130955	-0.0369267	0.00484984	0.0487851	-9.51e-05	-0.0171431	-0.0376776	-0.0705931	-0.0637973	-0.0372475
0.719	-0.0131615	-0.0362885	0.00462224	0.0475459	-0.000954744	-0.0162849	-0.0347185	-0.069117	-0.0634033	-0.0363561
0.72	-0.0133578	-0.0358752	0.00469778	0.0463134	-0.00206285	-0.0147061	-0.0308354	-0.0665881	-0.0619693	-0.0346987
0.721	-0.0135716	-0.0357248	0.00489316	0.0453547	-0.0029729	-0.0127189	-0.0262248	-0.0640497	-0.0597499	-0.032407
0.722	-0.0136467	-0.0356371	0.00513816	0.0446386	-0.0033348	-0.010587	-0.0209154	-0.0615153	-0.0574183	-0.0297635
0.723	-0.0136352	-0.0354477	0.00551228	0.0437962	-0.00309051	-0.00831645	-0.015236	-0.0588324	-0.0552838	-0.0273521
0.724	-0.0136838	-0.0351497	0.0060982	0.0424389	-0.00247009	-0.00570502	-0.00979779	-0.0563121	-0.0530205	-0.0257778
0.725	-0.0137655	-0.0347206	0.00691625	0.0403761	-0.00173116	-0.00246722	-0.00497145	-0.0540755	-0.050392	-0.0250903
0.726	-0.0137116	-0.034128	0.00790481	0.037686	-0.000944222	0.00157023	-0.00050744	-0.0518496	-0.0476965	-0.0248544
0.727	-0.013393	-0.0333867	0.00894091	0.0346791	-7.92e-05	0.00629816	0.00406375	-0.0495838	-0.0453452	-0.0248717
0.728	-0.0127397	-0.0324384	0.00995082	0.0317659	0.000771797	0.0112453	0.0088272	-0.0474899	-0.0435427	-0.0254342
0.729	-0.0117267	-0.0311987	0.0110084	0.0292899	0.00128715	0.0158616	0.0136475	-0.0453664	-0.0423511	-0.0269428
0.73	-0.0104349	-0.0297275	0.0123065	0.0274028	0.00114073	0.0199064	0.0184587	-0.0426866	-0.0416341	-0.0294781
0.731	-0.009045	-0.0281886	0.0139038	0.0259836	0.000314388	0.0233309	0.023038	-0.0394183	-0.041102	-0.0326161
0.732	-0.00773545	-0.0267655	0.0155694	0.0247936	-0.000913516	0.0259916	0.0270624	-0.0358063	-0.0406695	-0.0358186
0.733	-0.00658019	-0.0256545	0.0169445	0.0238651	-0.00220519	0.0276908	0.0304637	-0.0314798	-0.0404869	-0.0389856
0.734	-0.00561345	-0.0248847	0.0177826	0.0233418	-0.0033719	0.0284542	0.0332437	-0.0258657	-0.0404277	-0.0421801
0.735	-0.00496489	-0.0239266	0.0181901	0.0231248	-0.00437687	0.0286624	0.0351718	-0.019236	-0.0400327	-0.0449515
0.736	-0.00476798	-0.0215157	0.0185786	0.0230845	-0.00516209	0.0287393	0.0361326	-0.0122699	-0.0391746	-0.0464474
0.737	-0.00498201	-0.0165223	0.0191793	0.0232252	-0.00555676	0.0288266	0.0364718	-0.00502964	-0.0380455	-0.046023
0.738	-0.00538099	-0.00931113	0.0198177	0.0239571	-0.00534363	0.0288671	0.0365342	0.00256432	-0.0364519	-0.0435151
0.739	-0.00571818	-0.00159479	0.0202484	0.0264504	-0.00442384	0.0288985	0.0362438	0.00994655	-0.0340362	-0.0393642
0.74	-0.00594035	0.0049295	0.0203807	0.0318966	-0.0029352	0.0290853	0.0354484	0.0166256	-0.0310553	-0.0343404
0.741	-0.00618828	0.00927206	0.0201853	0.0406746	-0.00116194	0.0293717	0.0342492	0.0227783	-0.0280904	-0.0287219
0.742	-0.0066126	0.0110628	0.0195438	0.0524001	0.000724338	0.0294052	0.0328787	0.0283459	-0.0253549	-0.0222875
0.743	-0.00724873	0.0103519	0.0182836	0.0658486	0.00280963	0.0288467	0.0314044	0.0325379	-0.0229321	-0.0152488
0.744	-0.00796887	0.00746806	0.0164477	0.0791118	0.00520114	0.0275793	0.0296631	0.0348412	-0.0211682	-0.00838041
0.745	-0.00854037	0.00292004	0.0143009	0.090305	0.0077078	0.0257578	0.0276074	0.0356932	-0.0202845	-0.00221583
0.746	-0.00879086	-0.00268795	0.0121497	0.097902	0.00994017	0.0237552	0.025413	0.0356247	-0.0198981	0.00310124
0.747	-0.00870667	-0.00868031	0.0103442	0.10079	0.0116098	0.0219478	0.0231579	0.0345524	-0.0194888	0.00735609
0.748	-0.0083461	-0.0143997	0.00911766	0.0985574	0.0126114	0.0205477	0.0208481	0.0323192	-0.0190323	0.0103535
0.749	-0.00769344	-0.0193675	0.00840799	0.0916566	0.0129853	0.0196564	0.0187803	0.029164	-0.0185549	0.0121412
0.75	-0.00679855	-0.0232854	0.00803662	0.0810847	0.0127921	0.0192948	0.0173641	0.0254928	-0.0176782	0.0129217
0.751	-0.00599611	-0.0260528	0.00793801	0.0679791	0.0120783	0.019363	0.0165556	0.021617	-0.0161422	0.0130644
0.752	-0.00566233	-0.0278217	0.0081314	0.0534833	0.0110516	0.019608	0.0160209	0.0178273	-0.0141508	0.0128853
0.753	-0.00591243	-0.0288256	0.00857213	0.0387366	0.00999533	0.019766	0.0157462	0.0144209	-0.0119053	0.0122642
0.754	-0.00668257	-0.0292277	0.00915226	0.0247985	0.00917013	0.0199483	0.0158467	0.0115281	-0.00934069	0.010901
0.755	-0.007825	-0.0291021	0.00977841	0.0125392	0.00896841	0.0205833	0.0159618	0.0090793	-0.00667625	0.00881559
0.756	-0.00916597	-0.0284291	0.0104134	0.00256825	0.00967839	0.0219525	0.015496	0.00690518	-0.0046503	0.00612735
0.757	-0.0105699	-0.0272064	0.0110511	-0.00480453	0.0111221	0.0240749	0.0142364	0.00487738	-0.00357598	0.00284033
0.758	-0.0119607	-0.0255685	0.011555	-0.00954926	0.0128693	0.0267027	0.0122467	0.0028995	-0.00286303	-0.000554105
0.759	-0.0134038	-0.0237696	0.0116667	-0.0117687	0.0146172	0.0293425	0.00953903	0.000844914	-0.00222058	-0.00322872
0.76	-0.0149564	-0.0220783	0.0113101	-0.0115593	0.0162488	0.031584	0.0062794	-0.00135485	-0.00231523	-0.00508854
0.761	-0.0164579	-0.0207031	0.0107044	-0.00911595	0.0176651	0.0332143	0.00296462	-0.00379856	-0.00353674	-0.0064931
0.762	-0.0176914	-0.0197256	0.0100989	-0.00488569	0.0186323	0.0339765	-4.93e-05	-0.00667446	-0.0053658	-0.00726006
0.763	-0.0185344	-0.0191434	0.00952562	0.000421905	0.0188278	0.0335414	-0.00284638	-0.0100132	-0.00754212	-0.00722763
0.764	-0.0189584	-0.0190671	0.00891466	0.00595053	0.0179875	0.0318057	-0.00555386	-0.0135988	-0.0105721	-0.00704593
0.765	-0.0190504	-0.0196181	0.00828126	0.0109795	0.016045	0.0290556	-0.0082035	-0.0172446	-0.0145176	-0.00725503
0.766	-0.0189139	-0.0207675	0.00771772	0.0150318	0.0131512	0.0257657	-0.0109062	-0.0209613	-0.0185875	-0.00766385
0.767	-0.0186159	-0.0224738	0.00752784	0.017729	0.00962613	0.0224076	-0.0137473	-0.0246923	-0.0224418	-0.00829309
0.768	-0.0182429	-0.0246408	0.00818178	0.0188123	0.00598398	0.0193378	-0.0165841	-0.0281382	-0.0264595	-0.00961899
0.769	-0.0179075	-0.0269907	0.009738	0.0182925	0.0027057	0.0167083	-0.0190209	-0.0309873	-0.0303911	-0.0116854
0.77	-0.0177723	-0.0291635	0.0117487	0.016359	1.14e-05	0.0146235	-0.0208112	-0.0329812	-0.0333597	-0.0140503
0.771	-0.0179957	-0.0308858	0.0137976	0.0131708	-0.0019538	0.0132063	-0.0221687	-0.033959	-0.0353031	-0.0164795
0.772	-0.0185717	-0.0321363	0.0156179	0.00895942	-0.00294012	0.01238	-0.0232338	-0.0342856	-0.0368757	-0.0190567
0.773	-0.0193069	-0.0331045	0.0169344	0.00420193	-0.00270594	0.0119105	-0.0235828	-0.0346893	-0.038155	-0.0219312
0.774	-0.0199714	-0.0339325	0.0175532	-0.000472023	-0.00128154	0.0116247	-0.0227243	-0.0352906	-0.0387971	-0.0252346
0.775	-0.0203593	-0.0345961	0.0174988	-0.00450475	0.0010201	0.0113388	-0.020727	-0.0355812	-0.0391329	-0.0290169
0.776	-0.0203156	-0.0350226	0.0169907	-0.00765152	0.00382762	0.0107584	-0.0180343	-0.0356251	-0.039937	-0.0331561
0.777	-0.0198096	-0.0352915	0.0162739	-0.0100686	0.00676215	0.00962131	-0.0150418	-0.0361973	-0.0412814	-0.037484
0.778	-0.018936	-0.0356114	0.0154905	-0.0120771	0.00951479	0.00790048	-0.0121695	-0.0375261	-0.0425722	-0.0419402
0.779	-0.0178814	-0.0360791	0.0147321	-0.0137493	0.0119446	0.00574074	-0.00983155	-0.0390979	-0.0436185	-0.0463647
0.78	-0.0168234	-0.0366118	0.0140282	-0.014846	0.0138827	0.00313637	-0.00797212	-0.0407439	-0.0448703	-0.0505075
0.781	-0.0158447	-0.0370226	0.0132229	-0.0150926	0.015061	-4.64e-05	-0.00621883	-0.0427138	-0.0464917	-0.054329
0.782	-0.0149679	-0.0371009	0.0121508	-0.0144076	0.0152901	-0.00375285	-0.00466573	-0.0446633	-0.0478881	-0.0578144
0.783	-0.0142377	-0.0368143	0.0109438	-0.0130516	0.0145589	-0.00778256	-0.00381127	-0.0457688	-0.0485013	-0.0607136
0.784	-0.0137709	-0.0363605	0.00992847	-0.0114438	0.0131036	-0.0118993	-0.00381307	-0.0460013	-0.0483914	-0.0628131
0.785	-0.0136936	-0.0358996	0.00926528	-0.00974937	0.0113439	-0.0157446	-0.00444753	-0.0460042	-0.0477788	-0.0640878
0.786	-0.0139963	-0.0354215	0.00886721	-0.00785226	0.009677	-0.018957	-0.00547725	-0.0456079	-0.0467191	-0.0644031
0.787	-0.0145013	-0.0348567	0.00863562	-0.00561444	0.00834061	-0.0213478	-0.00665811	-0.0438363	-0.0453818	-0.0636504
0.788	-0.015016	-0.0341524	0.00854524	-0.00300484	0.00742907	-0.0228939	-0.00770913	-0.0404039	-0.044018	-0.0621587
0.789	-0.01548	-0.0332343	0.00854355	-0.000320663	0.00692693	-0.0236536	-0.00844806	-0.0359348	-0.0424346	-0.0602262
0.79	-0.0159497	-0.0320097	0.00855744	0.00179418	0.0066938	-0.0237501	-0.00885458	-0.0306537	-0.040082	-0.057525
0.791	-0.016458	-0.0305728	0.00853454	0.00313924	0.00672015	-0.0234986	-0.00895694	-0.0242659	-0.0369366	-0.0537772
0.792	-0.0168616	-0.029235	0.00847829	0.00437825	0.00723113	-0.0233927	-0.00873126	-0.0172922	-0.0337308	-0.0494915
0.793	-0.0169301	-0.0281797	0.00841481	0.00630408	0.00819924	-0.0238772	-0.00819214	-0.0110294	-0.0310399	-0.0452357
0.794	-0.016629	-0.0273173	0.00825703	0.00907953	0.00914546	-0.0251904	-0.00743532	-0.00603227	-0.0287792	-0.0408861
0.795	-0.0161073	-0.0265388	0.00790857	0.0120807	0.00961503	-0.0273537	-0.00658448	-0.00192838	-0.0268683	-0.0362319
0.796	-0.0155157	-0.025874	0.0074442	0.0142331	0.00945257	-0.0302507	-0.00587814	0.00135066	-0.025572	-0.0316016
0.797	-0.0149576	-0.0253317	0.0070298	0.0145865	0.00863483	-0.0337163	-0.00551763	0.00338532	-0.0248379	-0.0274513
0.798	-0.0144669	-0.0248349	0.00680451	0.0127478	0.00729364	-0.0375683	-0.00540937	0.00406925	-0.0241363	-0.0240441
0.799	-0.0140232	-0.0243593	0.00686638	0.00909329	0.00574851	-0.0416015	-0.00548684	0.00367822	-0.0233081	-0.021702
0.8	-0.0135976	-0.0239959	0.00728284	0.00469178	0.00420319	-0.0455743	-0.00595735	0.00243909	-0.0227257	-0.0206362
0.801	-0.0132115	-0.0238752	0.00804707	0.000909108	0.00270967	-0.0492554	-0.0069227	0.000467929	-0.0223648	-0.0206309
0.802	-0.0129281	-0.0239406	0.0090724	-0.000940339	0.00132693	-0.0524612	-0.00811534	-0.00201806	-0.0217697	-0.0213509
0.803	-0.0127958	-0.0239362	0.0101983	-4.63e-05	4.81e-05	-0.054958	-0.00916112	-0.00472827	-0.0210501	-0.0225993
0.804	-0.0128527	-0.0236835	0.0111374	0.00320349	-0.0010816	-0.0565227	-0.0099045	-0.00764023	-0.020833	-0.0241712
0.805	-0.0130588	-0.0231785	0.0116588	0.00729789	-0.00184741	-0.0570926	-0.0103933	-0.0109685	-0.0212527	-0.0258739
0.806	-0.0133017	-0.0225093	0.0117873	0.0107921	-0.00210727	-0.0566519	-0.0107868	-0.0146238	-0.0219197	-0.0276142
0.807	-0.0135146	-0.0217639	0.0117042	0.0132458	-0.00189948	-0.0551909	-0.0113542	-0.018068	-0.0228215	-0.0292601
0.808	-0.0136831	-0.0209688	0.0116436	0.014966	-0.00133072	-0.0528538	-0.0122209	-0.0208858	-0.0243014	-0.0305573
0.809	-0.0137945	-0.0201411	0.0117468	0.0164298	-0.00053806	-0.0498895	-0.0129572	-0.023119	-0.0261935	-0.0313281
0.81	-0.0138063	-0.0193762	0.0119648	0.0180761	0.000338549	-0.0464877	-0.0127849	-0.0248538	-0.0279816	-0.0316384
0.811	-0.0136907	-0.0188522	0.0121809	0.0200981	0.00119669	-0.0428134	-0.0113539	-0.0258788	-0.0296403	-0.0316112
0.812	-0.0134786	-0.0187471	0.0122618	0.0223237	0.00195709	-0.0391428	-0.00900532	-0.0260204	-0.0313716	-0.0313876
0.813	-0.0132597	-0.0191494	0.0120975	0.0244012	0.00247341	-0.0358329	-0.00628734	-0.0255605	-0.0328821	-0.0313329
0.814	-0.0131948	-0.0200397	0.0116811	0.0260049	0.00256319	-0.0331462	-0.00350836	-0.0249587	-0.0337817	-0.0318119
0.815	-0.0134167	-0.0212916	0.0110711	0.026925	0.00224015	-0.0311156	-0.0008719	-0.0243302	-0.0343746	-0.0326624
0.816	-0.013871	-0.0227417	0.0103535	0.0271025	0.00169656	-0.0295031	0.00114691	-0.0235255	-0.0352602	-0.033396
0.817	-0.0143762	-0.0242279	0.00963857	0.0265096	0.00116197	-0.027916	0.00190711	-0.0225186	-0.036247	-0.0341615
0.818	-0.0148466	-0.0255471	0.00900112	0.0250201	0.000891553	-0.0261008	0.00108679	-0.0214865	-0.0364875	-0.035555
0.819	-0.0153116	-0.0265795	0.00845207	0.022608	0.00102127	-0.0241397	-0.00110929	-0.0205987	-0.0356445	-0.0372524
0.82	-0.0157399	-0.0273092	0.00798699	0.0196056	0.00154068	-0.0222891	-0.00417336	-0.019858	-0.0340105	-0.0383144
0.821	-0.016014	-0.0276558	0.00761774	0.0166124	0.00244981	-0.0205512	-0.00762503	-0.019252	-0.0316568	-0.0389259
0.822	-0.0161299	-0.0274945	0.00738319	0.0141927	0.00375258	-0.0185533	-0.0110543	-0.0190471	-0.0285143	-0.0401514
0.823	-0.016226	-0.0267387	0.00732824	0.0126179	0.00545275	-0.0159423	-0.0139745	-0.0197011	-0.0251539	-0.0420289
0.824	-0.0163581	-0.0253552	0.00756829	0.0118964	0.00761071	-0.0125294	-0.0159689	-0.0213341	-0.0225626	-0.0436976
0.825	-0.0164333	-0.0234283	0.00826711	0.0119524	0.0101764	-0.00809131	-0.0169644	-0.0235227	-0.0211664	-0.0450249
0.826	-0.0163048	-0.0212092	0.00936364	0.0126177	0.0129053	-0.00258415	-0.0171223	-0.0257534	-0.0206168	-0.0463655
0.827	-0.0158659	-0.0189779	0.010643	0.0136274	0.0156116	0.00350736	-0.0165638	-0.0277842	-0.0205602	-0.0475354
0.828	-0.0151376	-0.0168703	0.0119881	0.0147044	0.0182255	0.00943208	-0.0154445	-0.0294923	-0.0212162	-0.0483662
0.829	-0.0142497	-0.0149872	0.0132747	0.0156451	0.0205875	0.0147567	-0.0141113	-0.0307014	-0.0228635	-0.0493412
0.83	-0.0133284	-0.0135026	0.0143075	0.0163635	0.0224594	0.0194443	-0.0128562	-0.0314495	-0.0251203	-0.0508785
0.831	-0.012411	-0.0125491	0.0148784	0.0167681	0.0237037	0.0234231	-0.0116799	-0.032241	-0.0273649	-0.0528271
0.832	-0.0115087	-0.0121992	0.0148075	0.0167139	0.0243879	0.0264623	-0.0106324	-0.033475	-0.0294854	-0.0549912
0.833	-0.0107498	-0.0124479	0.0140727	0.0160097	0.0247332	0.0283145	-0.0101537	-0.0347513	-0.0315895	-0.0572242
0.834	-0.0103446	-0.0131544	0.012846	0.0143844	0.0249095	0.0286955	-0.0106705	-0.0353456	-0.033407	-0.0589553
0.835	-0.0104187	-0.0141731	0.0114505	0.0117633	0.0248896	0.0274443	-0.0122011	-0.0351424	-0.0344549	-0.0594761
0.836	-0.0109096	-0.0153902	0.0103014	0.00847149	0.0245122	0.0248718	-0.0145977	-0.0345138	-0.0344816	-0.0586864
0.837	-0.0116132	-0.0166461	0.00969438	0.00502967	0.0236745	0.0216323	-0.0177128	-0.0337038	-0.0334461	-0.0569679
0.838	-0.0123537	-0.0177808	0.00963904	0.00191083	0.0224405	0.0182058	-0.0210515	-0.0330592	-0.031287	-0.0545888
0.839	-0.0130414	-0.0186512	0.010001	-0.000589797	0.0209518	0.0147898	-0.023678	-0.0331445	-0.0280771	-0.0517107
0.84	-0.0136011	-0.0191117	0.0106737	-0.0022334	0.0193048	0.0115598	-0.0249818	-0.034171	-0.0241229	-0.0486421
0.841	-0.0139973	-0.0191441	0.0115503	-0.00273033	0.0175363	0.00883261	-0.0251775	-0.03613	-0.0196022	-0.0457326
0.842	-0.0143197	-0.0189103	0.0124855	-0.00193293	0.0157087	0.00695674	-0.024646	-0.0392924	-0.014695	-0.0431183
0.843	-0.0146814	-0.0185377	0.0132358	5.55e-05	0.0139202	0.00598736	-0.0233679	-0.0438291	-0.0102202	-0.0407631
0.844	-0.0149628	-0.0180252	0.0135353	0.00301029	0.012274	0.00551811	-0.0213636	-0.0492044	-0.00721297	-0.038793
0.845	-0.0148829	-0.0174033	0.0132887	0.00696384	0.0109363	0.00495133	-0.0191131	-0.0546115	-0.00591505	-0.0376787
0.846	-0.0143502	-0.0167726	0.0125877	0.0126929	0.0099813	0.00402484	-0.0170792	-0.0596317	-0.00602583	-0.0379098
0.847	-0.0135187	-0.0161692	0.0117393	0.0214904	0.00916798	0.00300509	-0.0152009	-0.0637932	-0.00724459	-0.0396079
0.848	-0.0125408	-0.0156078	0.0111606	0.0341095	0.00816106	0.00229161	-0.0133245	-0.0662849	-0.00896052	-0.0424826
0.849	-0.0114072	-0.0152109	0.0110801	0.0498887	0.00685746	0.00200578	-0.011526	-0.0666023	-0.0105313	-0.0460101
0.85	-0.0100753	-0.0150821	0.0114877	0.066724	0.00535746	0.00205038	-0.00968493	-0.0647295	-0.0120711	-0.0497825
0.851	-0.0086649	-0.0151881	0.0122953	0.08207	0.00376089	0.00235768	-0.00753822	-0.060705	-0.0139559	-0.0535916
0.852	-0.00746029	-0.0154402	0.0133834	0.0942066	0.00209707	0.00291553	-0.00518093	-0.0546226	-0.0158454	-0.0571667
0.853	-0.00680493	-0.0157693	0.0145258	0.10261	0.000418172	0.00365231	-0.00290171	-0.0470096	-0.0171336	-0.0601649
0.854	-0.00695561	-0.0161503	0.015487	0.107402	-0.00114434	0.00444073	-0.000678661	-0.0386956	-0.0179185	-0.0622385
0.855	-0.00792577	-0.01655	0.0161624	0.108654	-0.00234858	0.00516195	0.00177345	-0.0301987	-0.01859	-0.0629688
0.856	-0.00943082	-0.0169098	0.0164599	0.106387	-0.00294592	0.00566386	0.00455189	-0.021673	-0.0189823	-0.0621348
0.857	-0.0110388	-0.0172137	0.0162973	0.100991	-0.00295326	0.00579853	0.00742277	-0.0134352	-0.0188583	-0.0599597
0.858	-0.0124429	-0.0174798	0.015763	0.0931393	-0.00255495	0.00560009	0.0101272	-0.00611244	-0.0185634	-0.0566976
0.859	-0.013497	-0.0177644	0.0150033	0.0834083	-0.00184284	0.00511405	0.012598	-0.000254723	-0.0184476	-0.0521263
0.86	-0.0141201	-0.0180922	0.0140667	0.0723026	-0.000906139	0.00414143	0.0148955	0.00394761	-0.0183731	-0.0460257
0.861	-0.0143535	-0.0182967	0.012958	0.0605557	8.92e-05	0.00244667	0.017007	0.00643036	-0.0182368	-0.0389294
0.862	-0.0143291	-0.0181905	0.0116882	0.0491345	0.00102029	-6.94e-06	0.0188207	0.0070604	-0.0184014	-0.0316341
0.863	-0.0141116	-0.0178363	0.0103288	0.0388815	0.00193424	-0.00307975	0.0204377	0.00611645	-0.0192483	-0.0243976
0.864	-0.0136521	-0.0174348	0.00903552	0.0302291	0.00299608	-0.00657227	0.0219745	0.00446825	-0.0205843	-0.0172404
0.865	-0.0129458	-0.0171082	0.00797128	0.0232374	0.00433025	-0.0103147	0.0230254	0.00277079	-0.0218297	-0.0106016
0.866	-0.0121616	-0.0169266	0.00723502	0.0177508	0.00601657	-0.0142032	0.023039	0.00107149	-0.0226	-0.00515349
0.867	-0.0114586	-0.0169229	0.00675627	0.0136664	0.00807002	-0.018202	0.0220534	-0.000446611	-0.0228478	-0.00127485
0.868	-0.010794	-0.0169395	0.00620069	0.0111047	0.0103535	-0.0221624	0.0205528	-0.00111045	-0.02245	0.000906314
0.869	-0.010048	-0.0167306	0.00518839	0.0100725	0.0126214	-0.0256156	0.0188069	-0.00070228	-0.0211272	0.0014854
0.87	-0.0092222	-0.0162817	0.00389398	0.0100883	0.014604	-0.0280386	0.0168294	0.00023766	-0.0190966	0.00106276
0.871	-0.00849134	-0.0157573	0.0030913	0.0104112	0.0161024	-0.0291545	0.0148638	0.00144659	-0.0169411	0.000553084
0.872	-0.00805587	-0.0151822	0.00341024	0.0106163	0.0170263	-0.0288813	0.0132458	0.00308225	-0.0147904	0.000673382
0.873	-0.00795214	-0.0143832	0.00496092	0.0108136	0.0173247	-0.0273506	0.0118309	0.00488204	-0.0126814	0.00176175
0.874	-0.00807964	-0.0132538	0.00747441	0.0112761	0.0169889	-0.0248705	0.0102006	0.00626211	-0.0111533	0.00384236
0.875	-0.00828431	-0.0119522	0.0105051	0.0119843	0.0160335	-0.0217462	0.00830245	0.00712836	-0.0105277	0.00676084
0.876	-0.00839517	-0.0107969	0.0136205	0.012605	0.0144724	-0.018196	0.00642497	0.00773835	-0.0103553	0.0103062
0.877	-0.00830549	-0.0100568	0.0164516	0.0128182	0.0124456	-0.0144683	0.00478824	0.00790248	-0.0103733	0.0142215
0.878	-0.00804298	-0.00982857	0.0187302	0.01257	0.0103292	-0.0109682	0.0034004	0.00711462	-0.0110433	0.0181482
0.879	-0.00770713	-0.0100853	0.0203723	0.0120399	0.00859139	-0.00802442	0.00216841	0.00532221	-0.0124522	0.0216037
0.88	-0.00732058	-0.0107931	0.0213366	0.0113996	0.00745938	-0.00562785	0.00102448	0.0028921	-0.013986	0.0240819
0.881	-0.00680406	-0.0119231	0.0215373	0.0105634	0.00677715	-0.00365583	-0.000185712	0.000165472	-0.0155092	0.0252622
0.882	-0.00611909	-0.0134286	0.0211192	0.00917709	0.00619903	-0.00216449	-0.00170668	-0.00241419	-0.017599	0.0250553
0.883	-0.00537235	-0.0152212	0.020474	0.0069258	0.00554046	-0.00131225	-0.00344368	-0.00436415	-0.0204265	0.0232619
0.884	-0.00473119	-0.0171627	0.019841	0.00394745	0.00485859	-0.00112068	-0.00497045	-0.00566661	-0.0234156	0.0192748
0.885	-0.00434066	-0.0191255	0.0192497	0.000822155	0.00421754	-0.00139853	-0.00626358	-0.00647994	-0.0260211	0.0125531
0.886	-0.00435659	-0.0209454	0.018687	-0.00179439	0.0035648	-0.00197799	-0.00791395	-0.00644443	-0.0279478	0.00344838
0.887	-0.00484366	-0.022379	0.0180075	-0.0033803	0.00280421	-0.00282276	-0.0103785	-0.00504456	-0.0289158	-0.00699168
0.888	-0.00560272	-0.0232568	0.0169916	-0.0036419	0.00205709	-0.00391725	-0.0135635	-0.00235899	-0.0289417	-0.0180053
0.889	-0.00639601	-0.0235245	0.0156359	-0.00250677	0.0017284	-0.00531598	-0.0172704	0.0010616	-0.0285228	-0.0292717
0.89	-0.00725862	-0.0231592	0.0141376	-0.000102949	0.00203283	-0.00710004	-0.0213258	0.00481231	-0.0283885	-0.0401662
0.891	-0.00837187	-0.0221908	0.0126038	0.00320082	0.00265623	-0.00918236	-0.0251236	0.00875668	-0.0291129	-0.0496481
0.892	-0.00984649	-0.0207242	0.0110433	0.00691076	0.00305278	-0.0114133	-0.027723	0.0125716	-0.0307363	-0.0569902
0.893	-0.011629	-0.0189347	0.00961866	0.0105126	0.00290174	-0.0138632	-0.0286914	0.0156007	-0.0329586	-0.0619423
0.894	-0.0134787	-0.0171227	0.00858995	0.0136859	0.00224269	-0.0167524	-0.0285316	0.0172092	-0.0356321	-0.0643239
0.895	-0.0150719	-0.0156406	0.00801055	0.0166284	0.00129862	-0.0201166	-0.0280803	0.0170953	-0.0386476	-0.0640458
0.896	-0.0160676	-0.014758	0.00771041	0.0197294	0.0002263	-0.0237327	-0.0276884	0.0153776	-0.0416943	-0.0612668
0.897	-0.0161868	-0.0146616	0.00754248	0.0229772	-0.000974221	-0.0273829	-0.0271782	0.0124528	-0.0444915	-0.0562477
0.898	-0.0154372	-0.0154244	0.00749217	0.025953	-0.00238334	-0.0310245	-0.0264645	0.00871816	-0.046925	-0.0493057
0.899	-0.0141122	-0.0169038	0.00760344	0.0281985	-0.0040052	-0.0347546	-0.0258635	0.00437768	-0.048864	-0.0409521
0.9	-0.0125428	-0.0188229	0.00789752	0.0296012	-0.00571665	-0.0386408	-0.0256492	-0.000458655	-0.0501496	-0.0318539
0.901	-0.0109893	-0.0210191	0.00830621	0.0303966	-0.00732287	-0.0425969	-0.0256249	-0.00556445	-0.0507594	-0.0226554
0.902	-0.0096313	-0.0234026	0.00873509	0.0308802	-0.00851992	-0.0466052	-0.0253654	-0.0106571	-0.0507252	-0.0138705
0.903	-0.00858065	-0.0257048	0.00923939	0.0316464	-0.00901103	-0.0506559	-0.0247155	-0.0154184	-0.050074	-0.00583598
0.904	-0.00789823	-0.0274894	0.00995589	0.0341149	-0.00875898	-0.0543341	-0.0238819	-0.0194433	-0.0490032	0.00113977
0.905	-0.00758264	-0.0283789	0.0107903	0.0402054	-0.00790167	-0.0569555	-0.023122	-0.0225334	-0.0476403	0.00662246
0.906	-0.00762423	-0.028258	0.011491	0.0511813	-0.0065475	-0.057972	-0.0224401	-0.0248294	-0.0456625	0.0103998
0.907	-0.00800196	-0.0273147	0.0121512	0.0669421	-0.00479711	-0.0571112	-0.0216556	-0.0264749	-0.0426502	0.0127005
0.908	-0.0086063	-0.0259152	0.0131466	0.0861358	-0.00275745	-0.0544125	-0.0207116	-0.0274185	-0.0386301	0.0137477
0.909	-0.00924946	-0.0243995	0.0145867	0.106674	-0.000649221	-0.0502515	-0.0195439	-0.0276723	-0.0340042	0.0136533
0.91	-0.00970063	-0.0229368	0.0162149	0.126662	0.00111202	-0.0452582	-0.017869	-0.0274961	-0.0293082	0.0128619
0.911	-0.0098155	-0.0215885	0.0177097	0.144611	0.00224464	-0.0401509	-0.0154992	-0.02702	-0.0252113	0.01204
0.912	-0.00968916	-0.0204436	0.0188685	0.15852	0.00280865	-0.0356339	-0.0124687	-0.0259437	-0.0223571	0.0115283
0.913	-0.00952213	-0.0196226	0.0195837	0.165948	0.00297708	-0.0323359	-0.00889201	-0.0239106	-0.0210013	0.0113748
0.914	-0.00938615	-0.0192276	0.0198706	0.165403	0.00277696	-0.030596	-0.00511229	-0.020944	-0.0208991	0.0116121
0.915	-0.00920757	-0.01925	0.0198918	0.157028	0.00223268	-0.0303215	-0.00173351	-0.017214	-0.0215617	0.0121697
0.916	-0.00889066	-0.0194991	0.0198543	0.142009	0.00157869	-0.0312054	0.000647569	-0.0125905	-0.0224774	0.0129023
0.917	-0.00840306	-0.0197486	0.0199468	0.121902	0.000991831	-0.0328488	0.00174103	-0.00675217	-0.0230531	0.0138177
0.918	-0.00781359	-0.0198796	0.0203759	0.0984998	0.000489529	-0.0347363	0.00183252	0.000446246	-0.0225808	0.015066
0.919	-0.00722685	-0.0198344	0.02134	0.0737274	0.000118228	-0.0364323	0.00160939	0.00877972	-0.0205703	0.0167383
0.92	-0.00667852	-0.0195775	0.0228724	0.0493464	-0.000165487	-0.0376987	0.00157357	0.0176014	-0.017155	0.01892
0.921	-0.00628372	-0.0191062	0.0247643	0.0268879	-0.000537629	-0.0383784	0.00186063	0.0259903	-0.0129293	0.02184
0.922	-0.00633217	-0.0184955	0.0266608	0.0076531	-0.00105284	-0.0383294	0.00253684	0.0330545	-0.00840913	0.0255933
0.923	-0.00693191	-0.017922	0.0282215	-0.00760969	-0.00164621	-0.0375198	0.00373177	0.0382159	-0.00395083	0.0299535
0.924	-0.0077679	-0.0175357	0.0292004	-0.0187874	-0.00235488	-0.0360728	0.00545366	0.0414662	-5.32e-05	0.034643
0.925	-0.008481	-0.0173634	0.0294707	-0.0260484	-0.00325528	-0.0340696	0.0074741	0.0432234	0.00279697	0.039483
0.926	-0.00904999	-0.0173795	0.0291576	-0.0297165	-0.00428595	-0.0314537	0.0095291	0.0437483	0.00451526	0.0443564
0.927	-0.00965073	-0.0176519	0.0285982	-0.0304223	-0.00530259	-0.0282309	0.0115366	0.0431308	0.00526191	0.0492498
0.928	-0.010366	-0.0183714	0.0279848	-0.0289691	-0.00619567	-0.0245721	0.0135902	0.0417899	0.00512504	0.0541838
0.929	-0.0111191	-0.0196329	0.0271975	-0.0260243	-0.00681793	-0.0206821	0.0157889	0.040417	0.0041889	0.0590198
0.93	-0.0118467	-0.0213068	0.0260776	-0.0221013	-0.00697281	-0.0166844	0.0180414	0.0394788	0.00263145	0.0634746
0.931	-0.0125572	-0.023182	0.0247038	-0.0177148	-0.00665572	-0.0126372	0.0200954	0.039076	0.000711522	0.0673012
0.932	-0.0131743	-0.0250791	0.0232948	-0.0134651	-0.00605705	-0.0085577	0.0216593	0.0392511	-0.00109608	0.0704344
0.933	-0.013508	-0.0267967	0.0220746	-0.00995496	-0.00525978	-0.00444314	0.0225485	0.0401883	-0.00216491	0.0730964
0.934	-0.0133695	-0.0281455	0.0213238	-0.00757154	-0.00420934	-0.000288826	0.0228904	0.0419684	-0.00228074	0.0756769
0.935	-0.0127328	-0.0291282	0.0212752	-0.00640215	-0.00293883	0.0039796	0.0229847	0.0443207	-0.00181721	0.0785007
0.936	-0.0118133	-0.0298355	0.0218891	-0.0063124	-0.00158041	0.0084129	0.0231032	0.0469103	-0.00101765	0.0818081
0.937	-0.0109146	-0.0302146	0.0228633	-0.00693594	-0.000207098	0.0127875	0.0235101	0.0496517	0.000367692	0.0856889
0.938	-0.0102494	-0.0301251	0.0238185	-0.00780111	0.00120439	0.0166879	0.0242903	0.0524818	0.00248616	0.0898683
0.939	-0.00998119	-0.0294802	0.0245109	-0.00859692	0.00274303	0.0198407	0.0252877	0.0551123	0.00501715	0.0938746
0.94	-0.0102605	-0.0282604	0.0249743	-0.00909342	0.00453627	0.0221427	0.0263076	0.0571599	0.00764624	0.0974576
0.941	-0.0110946	-0.0265356	0.0253279	-0.00907895	0.00666463	0.0235156	0.0272125	0.0584445	0.0104753	0.100465
0.942	-0.0123341	-0.0244878	0.0255348	-0.00853964	0.0091466	0.0239113	0.0280012	0.0590393	0.0136691	0.102585
0.943	-0.0137754	-0.022316	0.0255164	-0.00763996	0.0119422	0.0233973	0.0286852	0.0590439	0.0170445	0.103569
0.944	-0.0152165	-0.0202042	0.0252802	-0.00657748	0.0148085	0.0221182	0.0291103	0.0585871	0.0203087	0.103232
0.945	-0.0165386	-0.0184315	0.0248539	-0.00544483	0.0172783	0.0200843	0.0291897	0.0579691	0.0234745	0.101054
0.946	-0.0177452	-0.017319	0.0242176	-0.00410547	0.0189145	0.01721	0.0288962	0.0574593	0.0267284	0.0963545
0.947	-0.0188588	-0.0170186	0.0233041	-0.00229831	0.0195035	0.0135116	0.0279365	0.0569326	0.0299086	0.088952
0.948	-0.019845	-0.0175198	0.0220549	0.000102933	0.0190555	0.00904317	0.0259453	0.0559123	0.0325407	0.0792649
0.949	-0.0206281	-0.0187417	0.0204763	0.00309245	0.0178406	0.00388579	0.0228692	0.0540097	0.0344365	0.0678967
0.95	-0.0211364	-0.0204823	0.0187079	0.00668101	0.0163852	-0.00167538	0.0189047	0.0512253	0.0356547	0.0554705
0.951	-0.0213164	-0.0223764	0.0170457	0.0106365	0.0152014	-0.00708373	0.0142129	0.0477983	0.0359719	0.0426119
0.952	-0.0211021	-0.0239582	0.0158007	0.0140409	0.0144384	-0.0117094	0.0088094	0.0439001	0.0350809	0.0299696
0.953	-0.0205352	-0.0248007	0.0150813	0.0156144	0.0139001	-0.0151564	0.00280203	0.0397351	0.0331529	0.0182892
0.954	-0.0197832	-0.0247089	0.0147472	0.0147574	0.0133867	-0.0173189	-0.00334667	0.035663	0.0307921	0.00824544
0.955	-0.018926	-0.0238989	0.0146905	0.0119559	0.0128524	-0.0181158	-0.00902588	0.031942	0.0285438	0.000235171
0.956	-0.0179333	-0.0228711	0.0150135	0.00829064	0.0122767	-0.0173263	-0.0138459	0.0286231	0.0266061	-0.00553377
0.957	-0.0167893	-0.0220665	0.0158042	0.00502517	0.011653	-0.0148915	-0.0176256	0.0255531	0.0249321	-0.00895673
0.958	-0.0155143	-0.0217379	0.0170059	0.00345556	0.0111722	-0.0112059	-0.0203729	0.022293	0.0233489	-0.0101337
0.959	-0.0141035	-0.0220152	0.0185015	0.00452595	0.0111531	-0.00687382	-0.0224628	0.0182784	0.0215121	-0.00938956
0.96	-0.0125537	-0.0229087	0.0201322	0.00839861	0.0117808	-0.00238593	-0.024375	0.0131934	0.0189975	-0.0071698
0.961	-0.0109251	-0.0241909	0.0217538	0.0145152	0.013008	0.00180149	-0.026289	0.00721334	0.0155852	-0.00403559
0.962	-0.0093241	-0.0254741	0.0233604	0.0219939	0.0146042	0.00531526	-0.0282299	0.000879062	0.0114691	-0.000717787
0.963	-0.00789607	-0.0264668	0.0249836	0.0299238	0.0163304	0.00822458	-0.0302989	-0.0052458	0.00732668	0.00214171
0.964	-0.0067946	-0.0270298	0.0263864	0.0374387	0.0180425	0.010968	-0.0326176	-0.010766	0.00403877	0.0044885
0.965	-0.00611615	-0.0272228	0.0271258	0.0438231	0.0196225	0.0139517	-0.0351891	-0.0153916	0.0021312	0.00671819
0.966	-0.00580062	-0.0273333	0.0269943	0.0487705	0.0209037	0.0173937	-0.0379177	-0.0188709	0.0017382	0.00886505
0.967	-0.00560827	-0.0276335	0.0261494	0.052426	0.0216789	0.0213201	-0.0408564	-0.0211437	0.00286167	0.0104435
0.968	-0.00535139	-0.0281288	0.0248758	0.0550483	0.0217919	0.0255699	-0.0441804	-0.0223988	0.00522786	0.0112315
0.969	-0.00504078	-0.0285811	0.0234121	0.0567871	0.0212833	0.02986	-0.0478173	-0.0228115	0.00821767	0.0117529
0.97	-0.0047446	-0.0286818	0.021945	0.0578157	0.0204622	0.0339238	-0.0514689	-0.02235	0.0111563	0.0128164
0.971	-0.00447083	-0.0282712	0.020623	0.0584015	0.0198016	0.0375632	-0.054986	-0.020923	0.0135718	0.0148945
0.972	-0.00420487	-0.0275053	0.0195619	0.0587476	0.0197611	0.0404238	-0.0583883	-0.0186599	0.0153347	0.0180465
0.973	-0.00401055	-0.0266248	0.0187724	0.058931	0.0205247	0.0419314	-0.061512	-0.0158759	0.0166188	0.0219089
0.974	-0.00399789	-0.0256869	0.0181457	0.0589846	0.021861	0.0416509	-0.0639212	-0.0127332	0.0175771	0.0257705
0.975	-0.00414955	-0.0247143	0.0175944	0.0589383	0.0233691	0.0394763	-0.0651773	-0.00935072	0.018217	0.0290419
0.976	-0.00433464	-0.0238166	0.0170156	0.0588818	0.0247737	0.0355982	-0.0648665	-0.00611657	0.0186847	0.0313649
0.977	-0.00445995	-0.0230923	0.0162793	0.0589872	0.0259429	0.0304705	-0.0625516	-0.00326645	0.0193474	0.0323019
0.978	-0.00448105	-0.0225874	0.0153694	0.0593552	0.026756	0.0246959	-0.0581759	-0.000670546	0.0205065	0.0313641
0.979	-0.00435829	-0.0222935	0.0143993	0.0599213	0.0270115	0.0189456	-0.0523655	0.00151122	0.0221769	0.0284442
0.98	-0.00401532	-0.0222068	0.013678	0.0605638	0.0264205	0.0138838	-0.0459108	0.00269687	0.0240816	0.0239306
0.981	-0.00335311	-0.022388	0.0136446	0.0610779	0.0247762	0.0100621	-0.0391183	0.00242137	0.0257649	0.01832
0.982	-0.00237	-0.0228511	0.0144704	0.0610833	0.0221153	0.00776553	-0.0319771	0.000456038	0.0267536	0.0120733
0.983	-0.00121237	-0.0235365	0.015853	0.0602725	0.018671	0.00687898	-0.0246649	-0.00336869	0.0266045	0.00558516
0.984	-9.34e-05	-0.0243591	0.0173031	0.0587437	0.0147897	0.00696495	-0.017583	-0.00910277	0.0248362	-0.0011022
0.985	0.000860151	-0.0252141	0.0185691	0.0568622	0.0108635	0.00760586	-0.0110929	-0.0164896	0.0211084	-0.00825337
0.986	0.00162531	-0.0260287	0.0196382	0.0547659	0.00728334	0.00873356	-0.00546134	-0.0250169	0.015465	-0.0159248
0.987	0.00209784	-0.026714	0.0204426	0.052303	0.00441151	0.0104305	-0.0009227	-0.0341974	0.00820039	-0.0237544
0.988	0.00209937	-0.0271354	0.0208783	0.0494548	0.00261135	0.012521	0.00247	-0.0435485	-0.000411416	-0.0312473
0.989	0.00158369	-0.0272363	0.0209407	0.0463849	0.00221714	0.0145628	0.0050265	-0.0522043	-0.0101129	-0.0379117
0.99	0.000648497	-0.0270383	0.0205912	0.0432518	0.00327067	0.0160139	0.00723456	-0.0589843	-0.0203287	-0.0433586
0.991	-0.000601843	-0.0264908	0.0197844	0.0402578	0.00551183	0.0163551	0.0092978	-0.0631602	-0.0301697	-0.0476106
0.992	-0.0020994	-0.0254864	0.0186798	0.037687	0.00861233	0.0152338	0.0108162	-0.0648277	-0.0389777	-0.0510893
0.993	-0.0037806	-0.024012	0.0174465	0.0359512	0.0121729	0.0124273	0.0110393	-0.0643927	-0.0464002	-0.0542937
0.994	-0.00557743	-0.0221954	0.0160358	0.0355115	0.0157773	0.00774356	0.00958948	-0.0622167	-0.0519877	-0.0575812
0.995	-0.00737798	-0.0202813	0.0143528	0.0365147	0.0190261	0.00117275	0.00670948	-0.0587921	-0.0553452	-0.0610693
0.996	-0.00903616	-0.0185017	0.0123859	0.0386591	0.0214136	-0.00705362	0.00283608	-0.0545954	-0.0565668	-0.0647459
0.997	-0.0104365	-0.0168999	0.010139	0.0414216	0.0224729	-0.0166384	-0.00170755	-0.0497121	-0.0560322	-0.0687006
0.998	-0.0114276	-0.0154086	0.0075858	0.0442659	0.0220473	-0.0271992	-0.00667928	-0.0441317	-0.0539784	-0.0730402
0.999	-0.0118798	-0.0140819	0.00477582	0.0467299	0.0203483	-0.038215	-0.0118106	-0.0383447	-0.050592	-0.0775878
1	-0.0118971	-0.0131972	0.00192017	0.0486173	0.0177182	-0.0492545	-0.0168106	-0.0330404	-0.0462894	-0.0820014
1.001	-0.0117812	-0.0131102	-0.000678335	0.0502747	0.0143924	-0.0601095	-0.0215447	-0.0282517	-0.0416852	-0.086107
1.002	-0.0118022	-0.0139087	-0.00270376	0.0522559	0.0106303	-0.0707675	-0.026048	-0.0236614	-0.0373315	-0.0897621
1.003	-0.0120623	-0.0153941	-0.00390015	0.0544557	0.00686352	-0.081315	-0.0303214	-0.019638	-0.0335634	-0.0926711
1.004	-0.0125521	-0.0173634	-0.00415624	0.0559771	0.00356116	-0.0917677	-0.0342863	-0.016915	-0.0306043	-0.0946397
1.005	-0.0132057	-0.0195682	-0.00355949	0.0559079	0.00103844	-0.102122	-0.0377396	-0.0155714	-0.0286438	-0.0956937
1.006	-0.0139028	-0.0217048	-0.00231847	0.0539345	-0.000568772	-0.112442	-0.0402889	-0.0152875	-0.0277338	-0.0958422
1.007	-0.0145353	-0.0235972	-0.000556369	0.0501962	-0.00124846	-0.122589	-0.0415668	-0.0161631	-0.0278371	-0.0950353
1.008	-0.01501	-0.0250667	0.00171261	0.0448331	-0.00111827	-0.132014	-0.0415527	-0.0184107	-0.0290164	-0.0932792
1.009	-0.0152988	-0.0257757	0.00438952	0.0380122	-0.000463753	-0.140048	-0.040639	-0.0215851	-0.0313763	-0.0904581
1.01	-0.0154568	-0.0252721	0.00726405	0.030295	0.000359157	-0.146237	-0.0392545	-0.0250183	-0.0347844	-0.0861655
1.011	-0.0153648	-0.0231179	0.0100904	0.0225202	0.00112668	-0.150319	-0.0374276	-0.0287352	-0.0388873	-0.0800804
1.012	-0.0147958	-0.0192082	0.0126381	0.0154141	0.0017205	-0.152078	-0.0348433	-0.0331155	-0.0434263	-0.0725146
1.013	-0.0137767	-0.0138702	0.0148148	0.0095119	0.00209469	-0.151402	-0.0313521	-0.0381113	-0.0480997	-0.0643485
1.014	-0.0125648	-0.00762349	0.0166557	0.00514659	0.00237866	-0.148376	-0.0273139	-0.043491	-0.0523509	-0.0564096
1.015	-0.0114547	-0.000949262	0.0182191	0.00233777	0.00268746	-0.143314	-0.0234051	-0.0493314	-0.05575	-0.049188
1.016	-0.0106111	0.00589088	0.0194523	0.000748106	0.00296473	-0.136623	-0.0202841	-0.0557342	-0.0581705	-0.043093
1.017	-0.00992472	0.0127909	0.0202028	-9.18e-05	0.00324106	-0.128562	-0.0182783	-0.0623819	-0.0595177	-0.0383464
1.018	-0.00916206	0.019615	0.0205073	-0.000494914	0.00379229	-0.119215	-0.0172957	-0.0687408	-0.0595555	-0.0346735
1.019	-0.00831186	0.0261097	0.020634	-0.00058488	0.0049295	-0.108807	-0.0172682	-0.0744113	-0.057961	-0.0315029
1.02	-0.00765439	0.0319158	0.0208539	-0.000438134	0.00670546	-0.0978539	-0.0183195	-0.0789869	-0.0545832	-0.0281856
1.021	-0.00746095	0.0367929	0.0212859	-0.000318943	0.00891392	-0.08684	-0.0202495	-0.0819717	-0.0495716	-0.0241703
1.022	-0.00767752	0.0408099	0.021929	-0.00066234	0.0114427	-0.0759037	-0.0223863	-0.0830366	-0.0431836	-0.0193139
1.023	-0.00800832	0.0442184	0.022802	-0.0016184	0.0143924	-0.0649851	-0.0241618	-0.082089	-0.0356202	-0.0138216
1.024	-0.00825443	0.0472067	0.0238489	-0.00295917	0.0177838	-0.0541331	-0.0254403	-0.0790963	-0.0270822	-0.00789753
1.025	-0.00835635	0.0497555	0.0248187	-0.00461331	0.021427	-0.0435131	-0.0261978	-0.0740538	-0.017943	-0.00168332
1.026	-0.00818133	0.0516662	0.0254549	-0.00686104	0.0250619	-0.0332988	-0.0261568	-0.0670049	-0.00883071	0.0045181
1.027	-0.00752291	0.052694	0.0256919	-0.00993348	0.0285075	-0.0236243	-0.0248499	-0.0578938	-0.000464543	0.0102854
1.028	-0.0063332	0.0525381	0.0256613	-0.01369	0.0317536	-0.0145687	-0.0220226	-0.046611	0.00672379	0.0153966
1.029	-0.00477452	0.0508913	0.0255511	-0.0176363	0.0348866	-0.0061603	-0.0178394	-0.0332542	0.0127662	0.0198994
1.03	-0.00308559	0.0477592	0.0254857	-0.021016	0.0378988	0.00163331	-0.0126198	-0.0182096	0.0179045	0.0238447
1.031	-0.00140213	0.0435727	0.0256412	-0.0228743	0.0406734	0.00895669	-0.00661715	-0.00207077	0.0223735	0.0271362
1.032	0.000313034	0.0389295	0.0262182	-0.022256	0.0431677	0.0159613	-0.000166698	0.0144945	0.0263512	0.0298193
1.033	0.0020578	0.034339	0.0272054	-0.0184953	0.0455014	0.0224384	0.00625464	0.0308224	0.0300575	0.032263
1.034	0.00376444	0.0300977	0.0284445	-0.0114199	0.0478608	0.0277105	0.0122075	0.0462722	0.0338853	0.0348607
1.035	0.00542896	0.0262743	0.0297629	-0.00131296	0.0504012	0.0309663	0.0174757	0.0603037	0.0381339	0.0377444
1.036	0.00692771	0.0228085	0.0309796	0.0112056	0.0532514	0.0316972	0.0220987	0.0724732	0.0429036	0.0406871
1.037	0.00792771	0.0196007	0.0319467	0.0253605	0.056501	0.0299264	0.0260221	0.0822919	0.0484137	0.0431372
1.038	0.00816664	0.0164823	0.0324786	0.0404562	0.0600393	0.0259375	0.0288658	0.0891865	0.0548009	0.0444084
1.039	0.00763517	0.0131692	0.0323347	0.0556827	0.0634609	0.0198814	0.0302634	0.0927097	0.0615726	0.0439253
1.04	0.00649992	0.00942131	0.0313557	0.069932	0.0662135	0.0117813	0.0300608	0.0926455	0.0677481	0.0414264
1.041	0.00495722	0.00520462	0.0294815	0.0821869	0.0677785	0.00179894	0.0281045	0.0887806	0.0723775	0.0368917
1.042	0.00310995	0.000562359	0.0267113	0.0917544	0.0677488	-0.00959043	0.0240816	0.0810977	0.074569	0.0302766
1.043	0.00101549	-0.00451317	0.0231594	0.0980589	0.0659169	-0.0216396	0.0176766	0.0703578	0.07338	0.021622
1.044	-0.00117684	-0.0100272	0.0191409	0.100626	0.0623839	-0.0334424	0.00897725	0.0578743	0.0681609	0.0113882
1.045	-0.00321646	-0.0158916	0.0151679	0.0993463	0.0574114	-0.044158	-0.00142188	0.0447968	0.058887	0.000333176
1.046	-0.00487322	-0.0218578	0.011739	0.0945528	0.0511599	-0.0532299	-0.012605	0.0318947	0.0460187	-0.0108762
1.047	-0.00608214	-0.0275417	0.00912577	0.0868164	0.043807	-0.0604211	-0.0234209	0.0196243	0.0303364	-0.0218629
1.048	-0.00692961	-0.0324866	0.00738636	0.0768729	0.0358067	-0.0658289	-0.0328156	0.00823927	0.0131055	-0.0324933
1.049	-0.0075202	-0.0362793	0.00640043	0.0657414	0.0277176	-0.0697751	-0.0403498	-0.00209157	-0.00400505	-0.0426195
1.05	-0.0080117	-0.0388153	0.00588495	0.0546631	0.0198998	-0.0724776	-0.0462501	-0.0113101	-0.0195862	-0.0518448
1.051	-0.00863036	-0.0403749	0.00554925	0.0448064	0.0125717	-0.0738432	-0.0509748	-0.0194732	-0.032988	-0.0596959
1.052	-0.00944289	-0.041402	0.00521482	0.0368865	0.00593824	-0.0736572	-0.054902	-0.0266856	-0.0441061	-0.065994
1.053	-0.0103586	-0.0423617	0.0047869	0.0311031	0.000102463	-0.0719227	-0.0583341	-0.0330677	-0.0530458	-0.0707668
1.054	-0.011283	-0.0436471	0.00423019	0.0273531	-0.0050119	-0.068872	-0.0614781	-0.0387211	-0.0600825	-0.0739389
1.055	-0.0120768	-0.045364	0.0035525	0.0252247	-0.00949793	-0.064718	-0.0644177	-0.0436524	-0.0655555	-0.0753691
1.056	-0.0126651	-0.047253	0.00283061	0.0240121	-0.0132898	-0.059638	-0.067153	-0.0477594	-0.069641	-0.0750692
1.057	-0.0131291	-0.0488765	0.00231268	0.0229452	-0.0162438	-0.0539137	-0.0696297	-0.0509741	-0.0723512	-0.0733892
1.058	-0.0134626	-0.0498003	0.00240694	0.0213574	-0.0182612	-0.0476487	-0.0718001	-0.0530957	-0.0738744	-0.0709395
1.059	-0.0133695	-0.0497223	0.00347852	0.0188384	-0.0192585	-0.0403223	-0.0736667	-0.0534655	-0.0747935	-0.0682536
1.06	-0.0124898	-0.0485043	0.00555771	0.015402	-0.0192722	-0.0310882	-0.0752506	-0.0513294	-0.0757705	-0.0656541
1.061	-0.0108653	-0.0460515	0.00828461	0.0113805	-0.0184393	-0.0196644	-0.0764796	-0.0464444	-0.0770239	-0.0632724
1.062	-0.00892221	-0.0423668	0.0112138	0.0071969	-0.0165268	-0.00674886	-0.0769246	-0.0391541	-0.0782194	-0.0611788
1.063	-0.00699012	-0.0376629	0.0140279	0.00345339	-0.0130429	0.00654637	-0.0756701	-0.0301049	-0.0789601	-0.0596306
1.064	-0.00518428	-0.0323176	0.0164862	0.00116622	-0.00808518	0.0194216	-0.0717819	-0.0200434	-0.0792154	-0.0589081
1.065	-0.0036204	-0.0268238	0.018433	0.00149711	-0.00249904	0.0313314	-0.0650345	-0.00967002	-0.0790508	-0.0589107
1.066	-0.00237479	-0.0216315	0.0199348	0.00491773	0.00270808	0.0416437	-0.0562412	0.000566615	-0.0780888	-0.0591957
1.067	-0.00136693	-0.0169567	0.0212074	0.0108288	0.00676804	0.0498435	-0.0468054	0.0105007	-0.0756493	-0.0593311
1.068	-0.000504707	-0.012783	0.0223041	0.0180843	0.00932895	0.0559285	-0.0378124	0.0201202	-0.071375	-0.0588607
1.069	0.000123929	-0.00902023	0.0230669	0.0255847	0.0105456	0.0603147	-0.0297302	0.0293379	-0.0652117	-0.0571209
1.07	0.00031556	-0.00560788	0.023417	0.0324642	0.0109082	0.0634728	-0.0227984	0.0378998	-0.0572919	-0.0536416
1.071	4.6e-05	-0.00243122	0.0234966	0.0381235	0.0109135	0.0657674	-0.0172721	0.0456196	-0.0484425	-0.0484545
1.072	-0.000455835	0.000783695	0.0235118	0.0423362	0.0109254	0.0675039	-0.0131849	0.0524067	-0.040235	-0.0415874
1.073	-0.000969606	0.0042506	0.0236067	0.0452267	0.0112362	0.0689498	-0.0101678	0.0581184	-0.0342888	-0.0327981
1.074	-0.00141637	0.00773259	0.0238892	0.0471423	0.0120277	0.07022	-0.00786119	0.062647	-0.0316457	-0.0223248
1.075	-0.00175276	0.0107254	0.0244032	0.0486133	0.0132175	0.0712257	-0.0061351	0.0659897	-0.0327381	-0.0112698
1.076	-0.00189264	0.0130165	0.0249631	0.050014	0.0145697	0.071777	-0.00470479	0.068231	-0.0376329	-0.000931015
1.077	-0.00177281	0.0147151	0.0251294	0.0512918	0.0160164	0.0717105	-0.00311301	0.0695937	-0.0458539	0.00790587
1.078	-0.00139004	0.0159492	0.0246255	0.0523206	0.0176191	0.0709135	-0.00118253	0.0704197	-0.0562836	0.0151711
1.079	-0.000834924	0.016847	0.0236976	0.0531391	0.0192415	0.0692064	0.000865316	0.0710105	-0.067777	0.0211958
1.08	-0.00035054	0.0175306	0.0227957	0.0536628	0.0205162	0.0663792	0.00277562	0.0714672	-0.0795473	0.0263427
1.081	-5.31e-05	0.0179746	0.0220803	0.0535715	0.0211542	0.0624591	0.00448668	0.0717807	-0.0907441	0.0309511
1.082	0.000205705	0.0181249	0.0214549	0.0527098	0.0211983	0.0577837	0.00592702	0.0721947	-0.100264	0.0352857
1.083	0.000463574	0.018055	0.0209075	0.0513624	0.0209053	0.0528646	0.00688078	0.0731479	-0.107217	0.0394348
1.084	0.000575837	0.0179057	0.0206737	0.0499843	0.0205159	0.0482835	0.00711044	0.0747493	-0.111228	0.0432412
1.085	0.000541643	0.0178472	0.0210305	0.04878	0.0201431	0.0445545	0.00651912	0.0768182	-0.112087	0.0463576
1.086	0.000525069	0.0180478	0.0219856	0.0476447	0.0197687	0.0420335	0.00521658	0.0793171	-0.109394	0.0486902
1.087	0.000618808	0.0185797	0.0233738	0.0465029	0.0194694	0.0409162	0.0033836	0.0823465	-0.102883	0.0507281
1.088	0.000818217	0.0194205	0.025135	0.0455596	0.0194156	0.0411915	0.00125251	0.0859991	-0.0927325	0.0531596
1.089	0.00110565	0.0205193	0.0271458	0.0451295	0.0196773	0.0427074	-0.000797318	0.0903696	-0.0792985	0.0563633
1.09	0.00139781	0.0217447	0.0290427	0.0453538	0.0203244	0.0453098	-0.00235393	0.0955097	-0.0629635	0.0604547
1.091	0.00152849	0.0228481	0.0305666	0.0461962	0.0214712	0.048614	-0.00297008	0.101198	-0.0443612	0.0655354
1.092	0.00145756	0.0236254	0.0317165	0.0476153	0.023136	0.0514133	-0.0021806	0.106535	-0.0243144	0.071401
1.093	0.00146937	0.0240753	0.0320134	0.0496376	0.0251798	0.0513335	0.000135478	0.109715	-0.00353656	0.0768368
1.094	0.00200657	0.0243895	0.0297045	0.0522668	0.0273709	0.045393	0.00355411	0.108279	0.0173817	0.0795336
1.095	0.0033174	0.0248544	0.0222498	0.0553218	0.0294601	0.0312311	0.00707535	0.0998741	0.0378658	0.0770112
1.096	0.00532542	0.0257392	0.00765396	0.0583821	0.0308739	0.00785783	0.00885327	0.0830781	0.0573008	0.0675969
1.097	0.00753559	0.0270914	-0.0146705	0.0606577	0.0300399	-0.0245482	0.00617583	0.0575956	0.0747253	0.0506102
1.098	0.00889712	0.0283472	-0.0439015	0.0604667	0.0244463	-0.0651967	-0.00359821	0.0239971	0.088402	0.0260955
1.099	0.00813622	0.0280608	-0.0784138	0.0551947	0.011885	-0.113024	-0.0216879	-0.0163677	0.0959809	-0.00533343
1.1	0.00436198	0.0243259	-0.116373	0.0423673	-0.00837494	-0.166754	-0.0476703	-0.0615309	0.0955105	-0.0426384
1.101	-0.0026681	0.0158749	-0.156039	0.020747	-0.0354845	-0.224807	-0.0805552	-0.109424	0.0863503	-0.084677
1.102	-0.0127322	0.00272103	-0.195985	-0.00924752	-0.0677613	-0.28533	-0.119474	-0.158349	0.0690782	-0.130299
1.103	-0.0255501	-0.014393	-0.235109	-0.0456725	-0.103456	-0.346504	-0.163415	-0.207146	0.0448825	-0.178047
1.104	-0.0409798	-0.0348206	-0.272411	-0.086074	-0.141036	-0.406728	-0.210984	-0.255072	0.0151773	-0.22606
1.105	-0.0589487	-0.0582428	-0.307051	-0.128752	-0.179171	-0.464556	-0.260595	-0.301651	-0.0186991	-0.272463
1.106	-0.0792573	-0.0844957	-0.338533	-0.172761	-0.216568	-0.51886	-0.310759	-0.346657	-0.0557209	-0.315852
1.107	-0.10139	-0.11338	-0.366546	-0.217091	-0.251893	-0.568981	-0.360042	-0.389921	-0.0950272	-0.35545
1.108	-0.12463	-0.144454	-0.390892	-0.26036	-0.283993	-0.614507	-0.406996	-0.431015	-0.135679	-0.390795
1.109	-0.148316	-0.176815	-0.411637	-0.301032	-0.312177	-0.655029	-0.450506	-0.469225	-0.176659	-0.421482
1.11	-0.171909	-0.209338	-0.429078	-0.337925	-0.336277	-0.690095	-0.489981	-0.503869	-0.216991	-0.447168
1.111	-0.195033	-0.24123	-0.443611	-0.370521	-0.356482	-0.719305	-0.525076	-0.534632	-0.25596	-0.467529
1.112	-0.217538	-0.272185	-0.455846	-0.398517	-0.372956	-0.742547	-0.55547	-0.561502	-0.293154	-0.482278
1.113	-0.23943	-0.302071	-0.466765	-0.421416	-0.385663	-0.760027	-0.580839	-0.584406	-0.32819	-0.491332
1.114	-0.260709	-0.330646	-0.47741	-0.43881	-0.394569	-0.772061	-0.601013	-0.60315	-0.360656	-0.494948
1.115	-0.281381	-0.357558	-0.488556	-0.450518	-0.39995	-0.779042	-0.616151	-0.617684	-0.390189	-0.493761
1.116	-0.301594	-0.382628	-0.501018	-0.456574	-0.402443	-0.781551	-0.626641	-0.628229	-0.416291	-0.488637
1.117	-0.321634	-0.406011	-0.515707	-0.457727	-0.402779	-0.780301	-0.633	-0.635087	-0.438466	-0.480412
1.118	-0.341913	-0.428043	-0.533267	-0.455624	-0.401651	-0.775947	-0.635819	-0.638525	-0.456603	-0.469697
1.119	-0.363029	-0.449153	-0.554015	-0.45216	-0.399729	-0.768893	-0.63558	-0.638896	-0.470931	-0.456913
1.12	-0.385623	-0.469826	-0.577987	-0.448976	-0.397576	-0.759254	-0.632525	-0.636584	-0.481739	-0.442447
1.121	-0.410193	-0.49061	-0.604997	-0.447372	-0.395707	-0.747089	-0.626863	-0.631898	-0.489284	-0.426642
1.122	-0.437171	-0.512178	-0.634796	-0.44825	-0.39468	-0.732606	-0.618921	-0.625148	-0.493881	-0.409802
1.123	-0.466965	-0.535198	-0.667069	-0.452224	-0.394983	-0.716054	-0.609087	-0.616726	-0.495931	-0.39234
1.124	-0.499862	-0.560119	-0.701402	-0.459848	-0.396942	-0.697591	-0.597842	-0.606974	-0.495875	-0.374759
1.125	-0.535951	-0.58724	-0.737274	-0.471506	-0.40073	-0.677351	-0.585735	-0.595881	-0.4941	-0.357405
1.126	-0.575103	-0.616838	-0.77406	-0.487099	-0.406422	-0.655607	-0.57317	-0.583125	-0.490855	-0.340308
1.127	-0.617071	-0.649118	-0.811133	-0.506068	-0.414087	-0.632899	-0.560251	-0.568639	-0.48636	-0.323357
1.128	-0.661552	-0.684117	-0.847893	-0.52772	-0.423725	-0.609891	-0.546832	-0.552974	-0.480855	-0.306591
1.129	-0.708059	-0.721697	-0.883725	-0.551315	-0.435111	-0.587104	-0.5326	-0.536859	-0.474425	-0.290333
1.13	-0.755932	-0.761559	-0.918014	-0.575958	-0.447755	-0.564845	-0.517348	-0.520569	-0.467014	-0.274988
1.131	-0.80462	-0.803193	-0.950244	-0.600746	-0.461049	-0.543285	-0.501355	-0.503973	-0.458596	-0.260807
1.132	-0.853779	-0.845853	-0.980112	-0.625066	-0.474558	-0.52254	-0.485213	-0.486998	-0.44928	-0.247938
1.133	-0.903117	-0.88863	-1.00755	-0.648588	-0.488028	-0.502655	-0.469333	-0.469915	-0.439266	-0.236528
1.134	-0.952323	-0.930594	-1.0326	-0.671054	-0.501073	-0.483655	-0.453837	-0.453268	-0.428664	-0.226692
1.135	-1.00101	-0.970963	-1.05529	-0.69226	-0.513204	-0.465592	-0.438674	-0.437494	-0.417336	-0.218464
1.136	-1.04877	-1.00906	-1.07576	-0.712023	-0.524194	-0.448533	-0.423806	-0.422787	-0.404997	-0.211713
1.137	-1.09531	-1.04424	-1.09432	-0.730107	-0.534169	-0.432576	-0.409469	-0.409225	-0.391557	-0.206139
1.138	-1.14054	-1.07613	-1.11115	-0.746436	-0.543423	-0.417805	-0.396032	-0.396767	-0.377414	-0.201395
1.139	-1.18442	-1.10473	-1.12609	-0.761173	-0.552234	-0.404232	-0.383648	-0.385289	-0.363232	-0.197249
1.14	-1.22688	-1.13019	-1.139	-0.774366	-0.560711	-0.391965	-0.372263	-0.374652	-0.349519	-0.19366
1.141	-1.26773	-1.15285	-1.15009	-0.785822	-0.568798	-0.381243	-0.361735	-0.364782	-0.336671	-0.190692
1.142	-1.30666	-1.17321	-1.15984	-0.795378	-0.576348	-0.372249	-0.351916	-0.35574	-0.32508	-0.188357
1.143	-1.34343	-1.19159	-1.16868	-0.803003	-0.583239	-0.365067	-0.342747	-0.347534	-0.314918	-0.186551
1.144	-1.37782	-1.20822	-1.17672	-0.808749	-0.5895	-0.359776	-0.334263	-0.339863	-0.306042	-0.185218
1.145	-1.40977	-1.22332	-1.18392	-0.812862	-0.595404	-0.356353	-0.32658	-0.332264	-0.298264	-0.184547
1.146	-1.4394	-1.23692	-1.19023	-0.815882	-0.601357	-0.354375	-0.31976	-0.32457	-0.291451	-0.184818
1.147	-1.46691	-1.24892	-1.19552	-0.818517	-0.607518	-0.353078	-0.313809	-0.316922	-0.285363	-0.186043
1.148	-1.49245	-1.25922	-1.1996	-0.821475	-0.613794	-0.35177	-0.308792	-0.309315	-0.279732	-0.188007
1.149	-1.51611	-1.26785	-1.2025	-0.825288	-0.62011	-0.349979	-0.3047	-0.301555	-0.274408	-0.190516
1.15	-1.53795	-1.27498	-1.20448	-0.830116	-0.62632	-0.34739	-0.301311	-0.293509	-0.269201	-0.193376
1.151	-1.55796	-1.28097	-1.2058	-0.835656	-0.632067	-0.343831	-0.298276	-0.285135	-0.263758	-0.196321
1.152	-1.57611	-1.28609	-1.20661	-0.841373	-0.636915	-0.339256	-0.295302	-0.276415	-0.257688	-0.199066
1.153	-1.59247	-1.29043	-1.20706	-0.846858	-0.640504	-0.333744	-0.292243	-0.267304	-0.250772	-0.201327
1.154	-1.60706	-1.29396	-1.20723	-0.851886	-0.642679	-0.327387	-0.289045	-0.257784	-0.243136	-0.202729
1.155	-1.61984	-1.29661	-1.20711	-0.856198	-0.643518	-0.320018	-0.28579	-0.247937	-0.235212	-0.202865
1.156	-1.63079	-1.29839	-1.20654	-0.859568	-0.643189	-0.311139	-0.282605	-0.237848	-0.227387	-0.201603
1.157	-1.64006	-1.2994	-1.20527	-0.862008	-0.641881	-0.300392	-0.279289	-0.227415	-0.219858	-0.199203
1.158	-1.648	-1.29967	-1.20319	-0.863592	-0.639796	-0.288067	-0.275325	-0.216456	-0.212722	-0.195937
1.159	-1.65498	-1.29929	-1.20054	-0.864225	-0.636987	-0.274951	-0.270321	-0.205074	-0.205818	-0.191831
1.16	-1.66111	-1.29842	-1.19768	-0.863721	-0.633276	-0.261812	-0.264099	-0.193619	-0.198798	-0.186922
1.161	-1.66625	-1.29736	-1.19483	-0.861978	-0.628464	-0.249296	-0.256368	-0.182262	-0.191476	-0.181501
1.162	-1.67034	-1.29636	-1.19209	-0.859036	-0.622584	-0.23798	-0.246905	-0.171131	-0.183684	-0.175928
1.163	-1.67356	-1.29554	-1.1896	-0.855061	-0.616087	-0.228173	-0.236162	-0.160636	-0.175123	-0.170621
1.164	-1.67605	-1.2949	-1.18746	-0.850582	-0.609702	-0.219689	-0.225192	-0.15115	-0.165744	-0.166091
1.165	-1.67777	-1.29421	-1.18551	-0.846508	-0.604058	-0.212091	-0.214975	-0.142599	-0.15589	-0.162563
1.166	-1.67854	-1.29317	-1.18342	-0.843554	-0.599649	-0.205096	-0.205937	-0.134663	-0.145917	-0.159805
1.167	-1.67815	-1.29166	-1.181	-0.841992	-0.596877	-0.198556	-0.197984	-0.127076	-0.136062	-0.157419
1.168	-1.67641	-1.28968	-1.17823	-0.841933	-0.595689	-0.192416	-0.190925	-0.11959	-0.126606	-0.155064
1.169	-1.67331	-1.28722	-1.17525	-0.843339	-0.595478	-0.18667	-0.184806	-0.112056	-0.117748	-0.152401
1.17	-1.66901	-1.2842	-1.17219	-0.845815	-0.5956	-0.181068	-0.17966	-0.104608	-0.109539	-0.149087
1.171	-1.66369	-1.28056	-1.16906	-0.848721	-0.595661	-0.175165	-0.175196	-0.0974639	-0.101998	-0.144976
1.172	-1.65765	-1.27641	-1.16587	-0.851391	-0.595387	-0.168663	-0.171112	-0.0906435	-0.095225	-0.140092
1.173	-1.65129	-1.27192	-1.16282	-0.853201	-0.594589	-0.161623	-0.167447	-0.0840459	-0.0893496	-0.134437
1.174	-1.6448	-1.26728	-1.16018	-0.853731	-0.59308	-0.154363	-0.164279	-0.0777813	-0.0843924	-0.127952
1.175	-1.63808	-1.26259	-1.15808	-0.852909	-0.59054	-0.147246	-0.161291	-0.0721821	-0.0802744	-0.120638
1.176	-1.63092	-1.25786	-1.15648	-0.850862	-0.586642	-0.140602	-0.158033	-0.0674358	-0.076973	-0.112734
1.177	-1.62318	-1.25304	-1.15534	-0.847738	-0.581379	-0.134598	-0.15435	-0.0634526	-0.0745275	-0.104539
1.178	-1.61489	-1.24805	-1.15457	-0.843746	-0.575222	-0.129165	-0.150242	-0.0600524	-0.0729038	-0.0961563
1.179	-1.6062	-1.24282	-1.15389	-0.839265	-0.568882	-0.124183	-0.145816	-0.0571729	-0.0719886	-0.0877141
1.18	-1.59735	-1.2374	-1.15306	-0.834757	-0.562904	-0.119715	-0.141355	-0.0547774	-0.0716323	-0.079589
1.181	-1.58875	-1.23203	-1.15199	-0.830706	-0.55765	-0.115887	-0.137041	-0.0527112	-0.0715926	-0.0722077
1.182	-1.58062	-1.2269	-1.15053	-0.827578	-0.553367	-0.112617	-0.132883	-0.0508402	-0.0714622	-0.0657762
1.183	-1.57295	-1.22203	-1.14851	-0.825504	-0.550111	-0.109696	-0.12895	-0.0490251	-0.0706964	-0.0601259
1.184	-1.56567	-1.21741	-1.1459	-0.824215	-0.547785	-0.106979	-0.12543	-0.0470676	-0.0688245	-0.0548642
1.185	-1.55879	-1.213	-1.14285	-0.823393	-0.546325	-0.104254	-0.122359	-0.0448492	-0.0656888	-0.0496857
1.186	-1.55235	-1.20877	-1.13946	-0.822736	-0.545731	-0.101091	-0.119392	-0.0423566	-0.06143	-0.0444372
1.187	-1.54631	-1.20462	-1.13575	-0.821873	-0.545836	-0.0970219	-0.116166	-0.0396553	-0.0563473	-0.0390536
1.188	-1.54059	-1.20055	-1.13178	-0.820532	-0.546234	-0.0918257	-0.112736	-0.0367785	-0.0507845	-0.033529
1.189	-1.53503	-1.19643	-1.12766	-0.818754	-0.546449	-0.0854798	-0.109328	-0.0336978	-0.0450554	-0.027845
1.19	-1.5293	-1.19206	-1.12351	-0.816804	-0.546	-0.0779124	-0.105897	-0.0305338	-0.0394748	-0.021938
1.191	-1.52324	-1.18727	-1.11942	-0.81488	-0.544481	-0.0690784	-0.102245	-0.0275645	-0.0343491	-0.0158123
1.192	-1.51681	-1.18196	-1.11547	-0.81297	-0.541699	-0.0592629	-0.0982883	-0.025106	-0.0299101	-0.00956392
1.193	-1.50998	-1.1762	-1.1118	-0.810918	-0.537562	-0.04914	-0.0938335	-0.0235398	-0.026343	-0.00323932
1.194	-1.50273	-1.17023	-1.1086	-0.808531	-0.531996	-0.0395548	-0.0884212	-0.0232913	-0.023778	0.00312389
1.195	-1.49523	-1.16429	-1.10604	-0.805655	-0.525191	-0.0312582	-0.0818138	-0.0246257	-0.0221978	0.00920896
1.196	-1.48765	-1.15854	-1.10418	-0.802152	-0.517669	-0.0247571	-0.0743321	-0.0273583	-0.0214343	0.0143819
1.197	-1.48012	-1.15305	-1.10301	-0.797894	-0.510006	-0.020311	-0.066597	-0.0309656	-0.021191	0.0181017
1.198	-1.47265	-1.14795	-1.10239	-0.793033	-0.502703	-0.0178545	-0.059226	-0.0350229	-0.0211389	0.0201015
1.199	-1.46521	-1.14341	-1.10208	-0.788201	-0.496244	-0.016898	-0.0527471	-0.0393119	-0.0210745	0.020266
1.2	-1.45782	-1.1395	-1.1015	-0.78417	-0.491049	-0.0167942	-0.0476633	-0.0436671	-0.0208779	0.0187626
1.201	-1.45051	-1.13627	-1.10012	-0.781315	-0.487368	-0.0171267	-0.0443824	-0.0478793	-0.020445	0.0161137
1.202	-1.44333	-1.1337	-1.09777	-0.779585	-0.485224	-0.017685	-0.0428658	-0.0517737	-0.0197475	0.0129386
1.203	-1.43636	-1.13145	-1.09445	-0.778849	-0.484329	-0.01831	-0.0426098	-0.0553058	-0.0188591	0.00971491
1.204	-1.42975	-1.12911	-1.09018	-0.778811	-0.484075	-0.0189417	-0.0431453	-0.0584115	-0.0179687	0.00674501
1.205	-1.4236	-1.12652	-1.08522	-0.77894	-0.483824	-0.019536	-0.0441998	-0.0608538	-0.0173418	0.00424648
1.206	-1.41795	-1.12376	-1.07996	-0.778803	-0.483163	-0.0199688	-0.0454563	-0.0623807	-0.0171391	0.00239228
1.207	-1.41277	-1.12102	-1.0747	-0.77816	-0.481846	-0.020215	-0.0466307	-0.0627689	-0.0173423	0.00122686
1.208	-1.408	-1.11851	-1.0696	-0.776753	-0.479803	-0.0204175	-0.0476552	-0.0615344	-0.0178892	0.000597313
1.209	-1.40351	-1.11626	-1.06474	-0.774329	-0.477137	-0.0206941	-0.0485237	-0.0580507	-0.0187691	0.000327699
1.21	-1.39907	-1.114	-1.06012	-0.770935	-0.473902	-0.0210467	-0.0490121	-0.0519509	-0.0199629	0.000496296
1.211	-1.39428	-1.11154	-1.05581	-0.767027	-0.470089	-0.0215281	-0.0487679	-0.0433089	-0.0213422	0.00124792
1.212	-1.38882	-1.10896	-1.05195	-0.763171	-0.465851	-0.0223225	-0.0476268	-0.0329984	-0.022682	0.00249715
1.213	-1.38251	-1.10638	-1.04861	-0.759739	-0.461483	-0.0236482	-0.0456338	-0.0228606	-0.0238481	0.00427604
1.214	-1.37537	-1.1038	-1.04576	-0.75687	-0.457126	-0.0255854	-0.0430369	-0.0149913	-0.0248429	0.00706127
1.215	-1.36759	-1.10123	-1.04329	-0.754495	-0.452829	-0.0277468	-0.0401833	-0.01077	-0.0255938	0.0114564
1.216	-1.35943	-1.09863	-1.04095	-0.752434	-0.448858	-0.0293067	-0.0371961	-0.0104925	-0.0259486	0.0176963
1.217	-1.35121	-1.09599	-1.03819	-0.750559	-0.44554	-0.0293726	-0.0338626	-0.0135953	-0.0257974	0.0252651
1.218	-1.34319	-1.09334	-1.03441	-0.748854	-0.442779	-0.0272002	-0.029588	-0.0190297	-0.0249949	0.032836
1.219	-1.3356	-1.09073	-1.02905	-0.747194	-0.439985	-0.02255	-0.0235988	-0.0255719	-0.0232119	0.0388626
1.22	-1.32858	-1.08796	-1.02026	-0.745069	-0.436419	-0.016091	-0.0157389	-0.0320262	-0.0199151	0.0423542
1.221	-1.32141	-1.08451	-1.00555	-0.741713	-0.431418	-0.0093368	-0.00698368	-0.0373749	-0.01454	0.0431478
1.222	-1.31224	-1.07855	-0.986694	-0.736343	-0.424463	-0.00401656	0.00105996	-0.0409759	-0.0067444	0.041646
1.223	-1.30005	-1.06693	-0.969804	-0.728332	-0.415791	-0.00141609	0.00700338	-0.0426288	0.00323923	0.0384036
1.224	-1.286	-1.04879	-0.959652	-0.717859	-0.406937	-0.00215689	0.0100869	-0.0424436	0.0142918	0.0338962
1.225	-1.27202	-1.02738	-0.957543	-0.706455	-0.399965	-0.00616853	0.0102534	-0.0407052	0.024668	0.0284563
1.226	-1.25949	-1.00714	-0.962601	-0.696327	-0.396144	-0.0128501	0.00802455	-0.0377114	0.032821	0.0224166
1.227	-1.24909	-0.991384	-0.97277	-0.689079	-0.395644	-0.0214557	0.00399316	-0.0336193	0.0379607	0.0163191
1.228	-1.24105	-0.981856	-0.985599	-0.685222	-0.398092	-0.0312957	-0.00153216	-0.028497	0.0398873	0.0108227
1.229	-1.23531	-0.978886	-0.99882	-0.684569	-0.402839	-0.0416381	-0.00820175	-0.022476	0.0388056	0.00639476
1.23	-1.2316	-0.981868	-1.01059	-0.68659	-0.409001	-0.0515904	-0.0153656	-0.0158055	0.035432	0.00314643
1.231	-1.22971	-0.989665	-1.01951	-0.69044	-0.415659	-0.0602299	-0.0224673	-0.00880147	0.0307383	0.00106062
1.232	-1.22943	-1.00082	-1.02471	-0.695191	-0.42209	-0.0669241	-0.029409	-0.00164363	0.025565	0.000211868
1.233	-1.23036	-1.01373	-1.02591	-0.700259	-0.427944	-0.0714916	-0.036217	0.00569217	0.0206806	0.000507535
1.234	-1.232	-1.02678	-1.02339	-0.705417	-0.433077	-0.0741679	-0.0424222	0.0132056	0.0167899	0.00154891
1.235	-1.23391	-1.03856	-1.01764	-0.710416	-0.437136	-0.0754559	-0.0471659	0.0208129	0.014368	0.00287735
1.236	-1.23585	-1.04798	-1.00908	-0.71461	-0.439508	-0.075858	-0.049949	0.0284538	0.0137291	0.0040981
1.237	-1.23757	-1.05446	-0.998463	-0.717238	-0.439688	-0.075685	-0.0508755	0.0361215	0.0150399	0.00490978
1.238	-1.23865	-1.05781	-0.98694	-0.718031	-0.437657	-0.0749513	-0.0503219	0.0438524	0.018181	0.00507392
1.239	-1.23863	-1.05823	-0.97559	-0.717107	-0.433966	-0.0734581	-0.0487451	0.0516185	0.0227139	0.00433664
1.24	-1.23734	-1.05626	-0.965038	-0.714635	-0.429453	-0.0711036	-0.0466734	0.0591867	0.0279019	0.00261655
1.241	-1.23496	-1.05249	-0.955594	-0.710902	-0.424797	-0.0680599	-0.0444918	0.0660961	0.0327903	0.000157168
1.242	-1.23175	-1.04745	-0.947515	-0.706311	-0.420318	-0.0647406	-0.0421454	0.0718601	0.036451	-0.00273313
1.243	-1.22785	-1.04155	-0.940959	-0.701297	-0.41604	-0.0616646	-0.0393567	0.0762812	0.0383193	-0.00584268
1.244	-1.22327	-1.03513	-0.935828	-0.69618	-0.41182	-0.0593163	-0.0361911	0.0794287	0.0383817	-0.00892768
1.245	-1.21798	-1.02857	-0.931885	-0.690998	-0.40766	-0.0579984	-0.0332026	0.0814532	0.0369986	-0.011757
1.246	-1.21204	-1.02221	-0.928856	-0.685788	-0.403904	-0.0577674	-0.0310156	0.082587	0.0344889	-0.0142798
1.247	-1.2056	-1.01631	-0.92643	-0.680879	-0.400835	-0.0586377	-0.0298939	0.0830586	0.0310146	-0.0165849
1.248	-1.19891	-1.01096	-0.924313	-0.676609	-0.398363	-0.0605627	-0.0297276	0.0829795	0.0268391	-0.0188135
1.249	-1.19214	-1.00614	-0.922216	-0.673059	-0.396364	-0.063283	-0.0303699	0.0824073	0.0224047	-0.0212062
1.25	-1.18534	-1.00182	-0.919947	-0.670118	-0.394906	-0.0665455	-0.0319144	0.0814083	0.0181215	-0.0240609
1.251	-1.17856	-0.998037	-0.917489	-0.667615	-0.394156	-0.0701814	-0.0345266	0.0799062	0.014194	-0.0275845
1.252	-1.17188	-0.994698	-0.914881	-0.665498	-0.394285	-0.073955	-0.0381049	0.0775867	0.0105752	-0.0318154
1.253	-1.16545	-0.99149	-0.912155	-0.663877	-0.3953	-0.077528	-0.0422971	0.0741363	0.00704566	-0.0366762
1.254	-1.15946	-0.988042	-0.909302	-0.662818	-0.397006	-0.080609	-0.046817	0.0694655	0.00332977	-0.042028
1.255	-1.15409	-0.984156	-0.906223	-0.662228	-0.399238	-0.083182	-0.0515629	0.0636851	-0.000951313	-0.0475476
1.256	-1.1494	-0.979834	-0.902857	-0.66202	-0.401876	-0.0853874	-0.0563512	0.0569715	-0.00624829	-0.0527423
1.257	-1.14525	-0.975201	-0.899267	-0.662073	-0.404701	-0.0872617	-0.0608381	0.049578	-0.0128145	-0.0572737
1.258	-1.14139	-0.970367	-0.895442	-0.662126	-0.407354	-0.088755	-0.0647443	0.0418769	-0.020572	-0.0610159
1.259	-1.13765	-0.965417	-0.891127	-0.661902	-0.409428	-0.0898467	-0.0679013	0.0341605	-0.0291539	-0.0637556
1.26	-1.13393	-0.96064	-0.886276	-0.661193	-0.410682	-0.0905693	-0.0702104	0.0265513	-0.0380731	-0.0651555
1.261	-1.13012	-0.956415	-0.881332	-0.659938	-0.411161	-0.0909472	-0.0716909	0.0191693	-0.0470436	-0.0650143
1.262	-1.12612	-0.952848	-0.876732	-0.658266	-0.411015	-0.0909943	-0.0724121	0.0121599	-0.0559345	-0.0633881
1.263	-1.12185	-0.949773	-0.872601	-0.656294	-0.410268	-0.0908388	-0.0722156	0.00555018	-0.0643663	-0.0604706
1.264	-1.11727	-0.947011	-0.868924	-0.653942	-0.408869	-0.0906688	-0.0708392	-0.000723208	-0.0717044	-0.0564996
1.265	-1.11249	-0.944449	-0.865715	-0.651088	-0.406777	-0.0904385	-0.0683823	-0.00669358	-0.0774334	-0.0517878
1.266	-1.1077	-0.942004	-0.862977	-0.647867	-0.404011	-0.0898124	-0.0650522	-0.012366	-0.0813483	-0.0466328
1.267	-1.103	-0.939634	-0.860525	-0.64462	-0.400781	-0.0885024	-0.0607409	-0.0176555	-0.0835086	-0.041129
1.268	-1.09828	-0.937342	-0.858095	-0.641713	-0.39745	-0.0864152	-0.055394	-0.022324	-0.084029	-0.0351833
1.269	-1.09337	-0.935107	-0.855618	-0.639408	-0.394244	-0.0835102	-0.0493163	-0.0262055	-0.0829248	-0.0287555
1.27	-1.08831	-0.932823	-0.853102	-0.637638	-0.391081	-0.0799249	-0.0429723	-0.0294161	-0.080216	-0.0219755
1.271	-1.08334	-0.930212	-0.850385	-0.635962	-0.387732	-0.0760514	-0.036733	-0.0321886	-0.0760078	-0.0150726
1.272	-1.07869	-0.926859	-0.847246	-0.633943	-0.384119	-0.0722897	-0.0307416	-0.0347008	-0.0704898	-0.00830129
1.273	-1.07454	-0.922504	-0.843632	-0.63136	-0.380402	-0.0688656	-0.0251689	-0.0371791	-0.0639121	-0.00186599
1.274	-1.07092	-0.917249	-0.839649	-0.628114	-0.376884	-0.0658225	-0.0203742	-0.0399718	-0.0565814	0.00408706
1.275	-1.06762	-0.911376	-0.835493	-0.624294	-0.373844	-0.0631104	-0.0165069	-0.0433822	-0.0489693	0.00933318
1.276	-1.06435	-0.905083	-0.831453	-0.620269	-0.371425	-0.0605842	-0.0133638	-0.0474056	-0.0416667	0.0134791
1.277	-1.06089	-0.89852	-0.827752	-0.616517	-0.369627	-0.0579455	-0.010849	-0.0517494	-0.0351265	0.0161388
1.278	-1.05709	-0.892101	-0.824399	-0.613379	-0.368332	-0.0548647	-0.00919145	-0.0561691	-0.0295871	0.0170648
1.279	-1.05289	-0.886451	-0.821283	-0.610945	-0.367393	-0.051238	-0.00857257	-0.0605846	-0.0252758	0.0161232
1.28	-1.04838	-0.882009	-0.818273	-0.60925	-0.366708	-0.0472236	-0.00884501	-0.0648918	-0.0225101	0.0134465
1.281	-1.04365	-0.878866	-0.815244	-0.608343	-0.36614	-0.0428624	-0.00970424	-0.0688507	-0.0215252	0.00948217
1.282	-1.03868	-0.876759	-0.812164	-0.60808	-0.36551	-0.0378775	-0.0109335	-0.0721297	-0.0222217	0.00480398
1.283	-1.03356	-0.875272	-0.809036	-0.608163	-0.364717	-0.0319408	-0.012328	-0.0743983	-0.0240935	3.27e-05
1.284	-1.02859	-0.874113	-0.8058	-0.608342	-0.363725	-0.0249296	-0.0135692	-0.0754608	-0.0264847	-0.00431546
1.285	-1.02399	-0.873037	-0.802451	-0.608355	-0.362443	-0.0169567	-0.0144054	-0.0753658	-0.0288877	-0.00806973
1.286	-1.01969	-0.871625	-0.799076	-0.60783	-0.360619	-0.00822685	-0.0148121	-0.07422	-0.030979	-0.0111766
1.287	-1.01557	-0.869477	-0.79577	-0.606436	-0.357889	0.00100541	-0.0148649	-0.0720635	-0.0324616	-0.0133753
1.288	-1.01154	-0.866528	-0.792568	-0.604076	-0.354098	0.0103044	-0.0144774	-0.0691557	-0.0330148	-0.0143736
1.289	-1.0076	-0.862907	-0.789436	-0.600888	-0.349443	0.0190917	-0.0134021	-0.0659732	-0.0324069	-0.0141618
1.29	-1.0038	-0.858671	-0.786455	-0.597089	-0.344319	0.0268623	-0.0116289	-0.0628841	-0.0305744	-0.0130763
1.291	-1.00021	-0.853836	-0.783814	-0.592844	-0.339185	0.0333042	-0.00950159	-0.0602022	-0.0276911	-0.011561
1.292	-0.996846	-0.848468	-0.781477	-0.58831	-0.334395	0.0381999	-0.00734082	-0.0583715	-0.0240801	-0.0100227
1.293	-0.993627	-0.842775	-0.779238	-0.583682	-0.330174	0.0413403	-0.00525735	-0.0578511	-0.0200325	-0.00888998
1.294	-0.990378	-0.837169	-0.777178	-0.579102	-0.326858	0.0426525	-0.00335169	-0.0588945	-0.0158445	-0.00852509
1.295	-0.986977	-0.832147	-0.775678	-0.574543	-0.324866	0.0422877	-0.00184153	-0.0613534	-0.0118049	-0.00911427
1.296	-0.983412	-0.828028	-0.774837	-0.569882	-0.324431	0.0405241	-0.000901935	-0.0646612	-0.00807418	-0.0107436
1.297	-0.979677	-0.824818	-0.774243	-0.565258	-0.325516	0.0377132	-0.000681695	-0.0680816	-0.00483821	-0.0133658
1.298	-0.975801	-0.822378	-0.773388	-0.561115	-0.327892	0.0343962	-0.00158902	-0.0708882	-0.00239984	-0.0164546
1.299	-0.971993	-0.82066	-0.77192	-0.557883	-0.331157	0.031438	-0.00400778	-0.0723359	-0.000957838	-0.0188793
1.3	-0.96854	-0.819689	-0.76961	-0.555864	-0.334782	0.0297806	-0.00758332	-0.071764	-0.000531867	-0.019418
1.301	-0.965497	-0.819367	-0.766402	-0.555113	-0.338142	0.0298955	-0.0112715	-0.0689516	-0.000946236	-0.0173853
1.302	-0.962654	-0.81937	-0.762468	-0.555319	-0.340549	0.0317475	-0.0142094	-0.0642886	-0.00181474	-0.0129175
1.303	-0.959713	-0.819175	-0.758137	-0.555936	-0.341409	0.035159	-0.0161258	-0.0584618	-0.00269547	-0.00695443
1.304	-0.956486	-0.818261	-0.753793	-0.556371	-0.340396	0.0398903	-0.0168147	-0.0519921	-0.00314662	-0.000834573
1.305	-0.953061	-0.816396	-0.7497	-0.556096	-0.337461	0.0455409	-0.0160391	-0.0452271	-0.0027221	0.00427527
1.306	-0.949615	-0.813572	-0.745931	-0.55472	-0.332887	0.0514435	-0.0141688	-0.0386555	-0.000994911	0.00762424
1.307	-0.946131	-0.809847	-0.742553	-0.552204	-0.327347	0.0567508	-0.012053	-0.0329332	0.00227541	0.00868454
1.308	-0.942526	-0.805404	-0.739732	-0.548971	-0.321691	0.0607516	-0.0101889	-0.0286968	0.00699576	0.00705682
1.309	-0.938831	-0.800497	-0.737616	-0.545576	-0.316653	0.0630141	-0.00858062	-0.026364	0.0130738	0.00290281
1.31	-0.935033	-0.795336	-0.736257	-0.542424	-0.31265	0.0632798	-0.00727763	-0.0258917	0.0205132	-0.00291121
1.311	-0.931052	-0.790176	-0.735562	-0.53977	-0.309727	0.0612573	-0.0065352	-0.0267956	0.0288342	-0.00958792
1.312	-0.926908	-0.785432	-0.735311	-0.537842	-0.30776	0.0566813	-0.00650471	-0.0285414	0.0367979	-0.0170412
1.313	-0.922714	-0.781499	-0.735332	-0.536819	-0.306634	0.0497282	-0.00713818	-0.0307795	0.0430659	-0.0255163
1.314	-0.918644	-0.778501	-0.735625	-0.53665	-0.306192	0.0410916	-0.00856805	-0.0331834	0.0471901	-0.0348686
1.315	-0.914971	-0.776412	-0.736092	-0.537225	-0.306324	0.0315567	-0.0112966	-0.0353648	0.0498936	-0.0442504
1.316	-0.911913	-0.775245	-0.736265	-0.538717	-0.307118	0.0216619	-0.0156075	-0.0369081	0.052672	-0.0523134
1.317	-0.909486	-0.774939	-0.735615	-0.54149	-0.308699	0.011665	-0.0211611	-0.0371773	0.0572913	-0.0578032
1.318	-0.907554	-0.775242	-0.733937	-0.54558	-0.31098	0.00169053	-0.027429	-0.035368	0.0653589	-0.060161
1.319	-0.905891	-0.775768	-0.731244	-0.550455	-0.313461	-0.00812233	-0.0338549	-0.0311971	0.078182	-0.0597303
1.32	-0.90425	-0.776118	-0.727526	-0.555368	-0.315228	-0.0176229	-0.0396331	-0.0252689	0.0964149	-0.0573715
1.321	-0.902466	-0.775951	-0.722771	-0.5598	-0.315522	-0.0266378	-0.0442401	-0.0184415	0.1189	-0.0539454
1.322	-0.900467	-0.775013	-0.717176	-0.563392	-0.314246	-0.0348868	-0.0479505	-0.011056	0.142101	-0.0501039
1.323	-0.898228	-0.773152	-0.711162	-0.565713	-0.311739	-0.0422031	-0.0511522	-0.002728	0.161375	-0.0461653
1.324	-0.895708	-0.770338	-0.705164	-0.566398	-0.308423	-0.0488564	-0.0535029	0.00738307	0.172772	-0.0422596
1.325	-0.892791	-0.766675	-0.699539	-0.565355	-0.304761	-0.0553314	-0.0542127	0.0202577	0.173905	-0.0387301
1.326	-0.889346	-0.762409	-0.694562	-0.562681	-0.301108	-0.0618228	-0.0529107	0.0370314	0.164015	-0.0361452
1.327	-0.88531	-0.757812	-0.69042	-0.558507	-0.297589	-0.0680709	-0.0498156	0.0587194	0.143851	-0.0350389
1.328	-0.88073	-0.753016	-0.687223	-0.553071	-0.294485	-0.0734342	-0.0453793	0.0855828	0.115419	-0.0358431
1.329	-0.875718	-0.748105	-0.684921	-0.546776	-0.292377	-0.0770308	-0.0402254	0.116706	0.0814471	-0.0388435
1.33	-0.870476	-0.74326	-0.683225	-0.540173	-0.291736	-0.0782841	-0.0351459	0.149855	0.0446819	-0.0439853
1.331	-0.865392	-0.73874	-0.681723	-0.533845	-0.292578	-0.0774216	-0.0308212	0.182091	0.00755189	-0.0508833
1.332	-0.860855	-0.734758	-0.680158	-0.528186	-0.294583	-0.0750983	-0.0274457	0.210912	-0.027789	-0.0591426
1.333	-0.856866	-0.731329	-0.678456	-0.523411	-0.297416	-0.0718803	-0.0246632	0.234677	-0.0595648	-0.0684475
1.334	-0.853083	-0.728349	-0.676591	-0.519635	-0.300667	-0.0684008	-0.0221509	0.251846	-0.0864819	-0.0784101
1.335	-0.849251	-0.725773	-0.674618	-0.516767	-0.303891	-0.0654631	-0.0201204	0.260466	-0.107724	-0.0884416
1.336	-0.845396	-0.72358	-0.672657	-0.51456	-0.306959	-0.0635785	-0.0189546	0.258832	-0.123163	-0.0977873
1.337	-0.841703	-0.72174	-0.670689	-0.512844	-0.309905	-0.0626808	-0.0188452	0.24617	-0.133494	-0.105826
1.338	-0.838347	-0.720179	-0.668519	-0.511621	-0.312563	-0.0624712	-0.0199758	0.222793	-0.139784	-0.112119
1.339	-0.83537	-0.71868	-0.666034	-0.510956	-0.314686	-0.0629315	-0.0224797	0.190195	-0.142932	-0.116356
1.34	-0.832586	-0.717079	-0.663351	-0.51079	-0.316203	-0.0644904	-0.0260333	0.150964	-0.143683	-0.118547
1.341	-0.829704	-0.715408	-0.660691	-0.511004	-0.317019	-0.0676236	-0.0298418	0.108071	-0.142732	-0.119043
1.342	-0.826613	-0.713608	-0.658226	-0.511471	-0.316852	-0.072473	-0.0332302	0.0641685	-0.140532	-0.118358
1.343	-0.823442	-0.711539	-0.656003	-0.511923	-0.315501	-0.0789806	-0.0360282	0.021549	-0.137251	-0.117024
1.344	-0.820344	-0.709213	-0.654122	-0.512095	-0.313049	-0.0869592	-0.0382926	-0.0177678	-0.132987	-0.115511
1.345	-0.817362	-0.706785	-0.652807	-0.511962	-0.309769	-0.0959553	-0.0399476	-0.0521741	-0.127973	-0.114286
1.346	-0.814457	-0.704514	-0.652142	-0.511714	-0.305951	-0.105349	-0.0409006	-0.080616	-0.122644	-0.11375
1.347	-0.811602	-0.70261	-0.651919	-0.511525	-0.301799	-0.114571	-0.0413447	-0.102666	-0.117531	-0.114005
1.348	-0.808832	-0.701076	-0.651774	-0.511411	-0.29754	-0.123097	-0.0416181	-0.118374	-0.11309	-0.114729
1.349	-0.806265	-0.699807	-0.651368	-0.511414	-0.293285	-0.130323	-0.0418955	-0.128045	-0.109601	-0.115407
1.35	-0.804052	-0.698711	-0.650416	-0.511741	-0.288704	-0.135662	-0.0423217	-0.132237	-0.107135	-0.115848
1.351	-0.802196	-0.697761	-0.648668	-0.512517	-0.283342	-0.138701	-0.0431877	-0.131732	-0.10555	-0.116091
1.352	-0.800486	-0.696921	-0.646067	-0.513602	-0.277293	-0.139282	-0.0446573	-0.127414	-0.104542	-0.115915
1.353	-0.798754	-0.696037	-0.642775	-0.514689	-0.271205	-0.137512	-0.0465623	-0.120206	-0.10369	-0.114982
1.354	-0.796999	-0.694858	-0.639051	-0.51544	-0.265484	-0.133683	-0.0485734	-0.111128	-0.102499	-0.113245
1.355	-0.795152	-0.693133	-0.635204	-0.515548	-0.259999	-0.128127	-0.0503512	-0.101371	-0.100542	-0.11081
1.356	-0.792975	-0.690701	-0.631461	-0.514652	-0.254736	-0.121184	-0.0516205	-0.0920859	-0.0976142	-0.1072
1.357	-0.790291	-0.687514	-0.627869	-0.512328	-0.250192	-0.113395	-0.0521447	-0.0841547	-0.0937496	-0.10098
1.358	-0.78713	-0.683663	-0.624396	-0.508386	-0.247082	-0.10554	-0.0517273	-0.0781809	-0.0890738	-0.0905169
1.359	-0.78364	-0.679428	-0.621067	-0.503042	-0.246015	-0.0982999	-0.0505593	-0.0744232	-0.0837793	-0.0750847
1.36	-0.779973	-0.675135	-0.617985	-0.496752	-0.247232	-0.0919962	-0.0492324	-0.0728334	-0.0783112	-0.0554979
1.361	-0.776277	-0.670964	-0.615153	-0.490028	-0.250499	-0.0868124	-0.0482169	-0.0732044	-0.0733741	-0.0334552
1.362	-0.772641	-0.666953	-0.612437	-0.483334	-0.255427	-0.0831368	-0.047656	-0.0750975	-0.0697255	-0.00981997
1.363	-0.769003	-0.663086	-0.609901	-0.477108	-0.261646	-0.0814418	-0.0475149	-0.0778718	-0.0677901	0.0158803
1.364	-0.765236	-0.65936	-0.607895	-0.471753	-0.268577	-0.0818212	-0.0476479	-0.0809734	-0.0666405	0.0442522
1.365	-0.761403	-0.655866	-0.606503	-0.467506	-0.275426	-0.0838335	-0.0477529	-0.0839916	-0.0633741	0.0746378
1.366	-0.75776	-0.652738	-0.605232	-0.464386	-0.281558	-0.0867924	-0.0475191	-0.0864683	-0.0541751	0.104448
1.367	-0.754483	-0.650043	-0.603492	-0.462274	-0.286703	-0.0900516	-0.0469687	-0.0879574	-0.0359143	0.12999
1.368	-0.751559	-0.647782	-0.601126	-0.461097	-0.290708	-0.0931179	-0.0464497	-0.0882242	-0.00714645	0.148232
1.369	-0.748919	-0.64588	-0.598431	-0.460952	-0.293355	-0.0957023	-0.0462288	-0.0872322	0.0313792	0.157988
1.37	-0.746539	-0.64413	-0.595893	-0.461838	-0.294464	-0.0976487	-0.0462506	-0.085007	0.0769593	0.160307
1.371	-0.74444	-0.642306	-0.593845	-0.463285	-0.294032	-0.0988152	-0.0462601	-0.0816102	0.125701	0.158025
1.372	-0.742609	-0.640255	-0.592346	-0.464521	-0.292098	-0.0990641	-0.0459756	-0.0773408	0.172969	0.154244
1.373	-0.740952	-0.637799	-0.591404	-0.464968	-0.288332	-0.0982959	-0.0450608	-0.0728108	0.213812	0.150878
1.374	-0.739389	-0.634824	-0.590986	-0.464503	-0.282045	-0.0964763	-0.0431881	-0.0686594	0.243797	0.148166
1.375	-0.737875	-0.631447	-0.59085	-0.463314	-0.27253	-0.093634	-0.0404259	-0.0652611	0.259806	0.144864
1.376	-0.736325	-0.627901	-0.590756	-0.461617	-0.259267	-0.0897962	-0.0372124	-0.0626409	0.26053	0.139098
1.377	-0.734665	-0.624425	-0.590536	-0.459588	-0.242315	-0.0849162	-0.0338607	-0.0604984	0.246577	0.129614
1.378	-0.732917	-0.621328	-0.589922	-0.457396	-0.222862	-0.0789016	-0.030608	-0.0582751	0.220058	0.116348
1.379	-0.731106	-0.618853	-0.588559	-0.455262	-0.203422	-0.0717704	-0.0278897	-0.0554041	0.183932	0.100034
1.38	-0.729124	-0.617017	-0.586143	-0.453497	-0.187116	-0.0637299	-0.0259472	-0.0516784	0.141573	0.0816131
1.381	-0.726792	-0.615698	-0.582589	-0.452348	-0.176241	-0.05507	-0.0243359	-0.0473446	0.0965324	0.0619752
1.382	-0.724016	-0.614612	-0.578121	-0.45161	-0.171643	-0.0460597	-0.0223249	-0.0429083	0.0521879	0.0420878
1.383	-0.720784	-0.613384	-0.573149	-0.450647	-0.173249	-0.0364592	-0.0196921	-0.0389399	0.0114528	0.0230452
1.384	-0.717173	-0.611752	-0.568111	-0.449004	-0.18047	-0.0243608	-0.0167964	-0.035912	-0.023447	0.00553228
1.385	-0.713423	-0.609569	-0.563448	-0.446686	-0.192128	-0.00603638	-0.0140682	-0.0340492	-0.051253	-0.0104666
1.386	-0.709846	-0.606808	-0.559639	-0.443913	-0.206632	0.0221653	-0.01174	-0.0332056	-0.0717916	-0.0250733
1.387	-0.706645	-0.603714	-0.556984	-0.44088	-0.222464	0.0619295	-0.0100316	-0.0327723	-0.0856327	-0.0380504
1.388	-0.70386	-0.600682	-0.555346	-0.437735	-0.238453	0.112669	-0.00927841	-0.0318226	-0.0936613	-0.048943
1.389	-0.701428	-0.597885	-0.554366	-0.43472	-0.253716	0.172129	-0.0095584	-0.0296964	-0.0970122	-0.0572753
1.39	-0.699261	-0.595282	-0.553786	-0.432198	-0.267502	0.236777	-0.0104019	-0.0264574	-0.0970894	-0.0626728
1.391	-0.697206	-0.592814	-0.553424	-0.43043	-0.278957	0.301703	-0.0111902	-0.0226338	-0.0953046	-0.0650959
1.392	-0.695014	-0.59042	-0.553115	-0.429291	-0.287257	0.360893	-0.0115316	-0.0189661	-0.0927087	-0.0649719
1.393	-0.692481	-0.588072	-0.552723	-0.428244	-0.292025	0.408099	-0.0111889	-0.0163884	-0.0898827	-0.0629922
1.394	-0.68955	-0.585799	-0.552152	-0.426724	-0.293378	0.437914	-0.0101322	-0.0155027	-0.0870107	-0.0598025
1.395	-0.686338	-0.583692	-0.551373	-0.424532	-0.291829	0.44698	-0.00865836	-0.0161926	-0.0840974	-0.0558282
1.396	-0.683149	-0.581921	-0.550376	-0.421988	-0.288215	0.434729	-0.00734069	-0.0180721	-0.0813734	-0.0513274
1.397	-0.680254	-0.580675	-0.549168	-0.419729	-0.283507	0.40329	-0.00727646	-0.0208573	-0.0793276	-0.0465575
1.398	-0.677685	-0.580068	-0.547831	-0.418303	-0.278731	0.357057	-0.00997859	-0.0243617	-0.0783203	-0.0417949
1.399	-0.675309	-0.580035	-0.546446	-0.418011	-0.274709	0.302195	-0.0157316	-0.0284854	-0.0784522	-0.0373218
1.4	-0.672957	-0.580303	-0.54498	-0.418909	-0.271679	0.245859	-0.0224181	-0.0330808	-0.0795171	-0.0334603
1.401	-0.670456	-0.58041	-0.543325	-0.420753	-0.269437	0.194815	-0.02698	-0.038025	-0.080904	-0.0304219
1.402	-0.667702	-0.579894	-0.541452	-0.423057	-0.267661	0.154124	-0.0275465	-0.0434119	-0.0818836	-0.0280242
1.403	-0.664757	-0.57857	-0.539413	-0.425226	-0.266	0.126368	-0.0240977	-0.0492623	-0.0818822	-0.0257366
1.404	-0.661791	-0.576611	-0.537171	-0.426735	-0.264177	0.1112	-0.0179238	-0.0552523	-0.0804721	-0.02316
1.405	-0.659015	-0.574238	-0.53458	-0.427262	-0.262099	0.105709	-0.0106427	-0.0609596	-0.0775301	-0.0202325
1.406	-0.65668	-0.571352	-0.531509	-0.426689	-0.259856	0.105663	-0.00347743	-0.0661059	-0.0734796	-0.0170364
1.407	-0.65498	-0.567711	-0.528064	-0.425056	-0.257636	0.106826	0.00278904	-0.0704663	-0.0691141	-0.0137883
1.408	-0.653936	-0.563427	-0.524609	-0.422502	-0.255628	0.105944	0.0076016	-0.0737966	-0.0651397	-0.0109409
1.409	-0.653379	-0.558984	-0.521478	-0.419226	-0.253955	0.101139	0.010705	-0.0759251	-0.0620306	-0.00908639
1.41	-0.653027	-0.55481	-0.518727	-0.415537	-0.252683	0.0918282	0.0122362	-0.076674	-0.0601276	-0.00867818
1.411	-0.652589	-0.55108	-0.516231	-0.411915	-0.251932	0.0782719	0.0126071	-0.0756074	-0.059512	-0.00983471
1.412	-0.651876	-0.547916	-0.513923	-0.408791	-0.251923	0.061022	0.0123359	-0.0718695	-0.05992	-0.0124034
1.413	-0.650852	-0.545507	-0.511788	-0.406347	-0.252825	0.0408231	0.0119501	-0.0644954	-0.0610344	-0.0161234
1.414	-0.649457	-0.54394	-0.509847	-0.404685	-0.254561	0.0187307	0.0120094	-0.0534188	-0.0626391	-0.0208359
1.415	-0.647519	-0.543152	-0.508244	-0.403783	-0.256689	-0.00403715	0.0128462	-0.0400726	-0.0643609	-0.0265346
1.416	-0.64494	-0.542918	-0.507077	-0.403346	-0.258691	-0.0262944	0.0141366	-0.0267357	-0.0655724	-0.0330028
1.417	-0.641803	-0.542876	-0.506201	-0.403072	-0.260454	-0.0469335	0.015141	-0.015512	-0.0658145	-0.0397165
1.418	-0.638365	-0.542775	-0.505371	-0.403068	-0.262172	-0.0650306	0.0153554	-0.00785799	-0.0652633	-0.0463557
1.419	-0.63497	-0.542493	-0.504486	-0.403681	-0.263883	-0.0799435	0.0145617	-0.00452196	-0.0646012	-0.052909
1.42	-0.631903	-0.54188	-0.503591	-0.405026	-0.265355	-0.0912479	0.0124694	-0.00561147	-0.0643543	-0.0592375
1.421	-0.629312	-0.540864	-0.502707	-0.407014	-0.266328	-0.0987281	0.00884834	-0.0106505	-0.0646269	-0.0649219
1.422	-0.627161	-0.539514	-0.50175	-0.409501	-0.266681	-0.102456	0.00388843	-0.0181238	-0.065568	-0.0694651
1.423	-0.625308	-0.53794	-0.500524	-0.412208	-0.266321	-0.102743	-0.00189578	-0.0253686	-0.06754	-0.0724407
1.424	-0.62368	-0.536214	-0.498907	-0.41472	-0.265045	-0.100006	-0.00798157	-0.0300888	-0.0706801	-0.0734061
1.425	-0.622334	-0.534307	-0.497042	-0.416641	-0.262389	-0.0948078	-0.0138537	-0.0317404	-0.0746763	-0.0719053
1.426	-0.621344	-0.532117	-0.495213	-0.417662	-0.25759	-0.0880059	-0.0188685	-0.0309815	-0.0788626	-0.0673136
1.427	-0.620608	-0.52956	-0.493636	-0.417477	-0.250119	-0.0807482	-0.0224317	-0.0286858	-0.0823226	-0.0579496
1.428	-0.619873	-0.526567	-0.492374	-0.41589	-0.240397	-0.0742406	-0.0242664	-0.025907	-0.0841729	-0.0410542
1.429	-0.618896	-0.523192	-0.491367	-0.413049	-0.229833	-0.0693998	-0.0243898	-0.0239704	-0.0839405	-0.0150453
1.43	-0.617447	-0.519707	-0.490612	-0.409388	-0.220251	-0.0665495	-0.0230462	-0.0239889	-0.0816226	0.0184451
1.431	-0.615435	-0.516393	-0.490159	-0.405505	-0.21318	-0.0654529	-0.0208752	-0.0263055	-0.0775749	0.0550505
1.432	-0.61303	-0.513371	-0.489935	-0.402147	-0.209363	-0.0656658	-0.0187962	-0.0304547	-0.0724467	0.0895766
1.433	-0.610498	-0.510687	-0.489787	-0.39997	-0.208705	-0.0668704	-0.0173857	-0.0355283	-0.0669401	0.11765
1.434	-0.608078	-0.508493	-0.489623	-0.399137	-0.210601	-0.0689499	-0.0167641	-0.0405237	-0.0615262	0.136399
1.435	-0.606028	-0.507002	-0.489355	-0.399374	-0.214373	-0.0717019	-0.0171211	-0.0445218	-0.0564286	0.144545
1.436	-0.604543	-0.506247	-0.488788	-0.400284	-0.219432	-0.0746687	-0.0187647	-0.0468941	-0.051775	0.142456
1.437	-0.603633	-0.505987	-0.487696	-0.401472	-0.225217	-0.0774867	-0.0216324	-0.0475556	-0.0478256	0.131833
1.438	-0.603219	-0.505862	-0.486036	-0.402691	-0.231214	-0.0801831	-0.0251529	-0.0468679	-0.0450183	0.114876
1.439	-0.603205	-0.505539	-0.484	-0.403823	-0.236832	-0.0830141	-0.0285538	-0.0452069	-0.0436116	0.0936641
1.44	-0.603366	-0.504816	-0.481868	-0.404564	-0.241376	-0.0860953	-0.0311248	-0.0426983	-0.0434502	0.0701753
1.441	-0.603425	-0.503682	-0.479809	-0.404448	-0.244475	-0.0892276	-0.0324297	-0.0393933	-0.0441546	0.0463569
1.442	-0.603233	-0.502264	-0.477846	-0.403177	-0.246389	-0.0921742	-0.032528	-0.0355694	-0.0454044	0.0239192
1.443	-0.602743	-0.500823	-0.475958	-0.400895	-0.247736	-0.0949649	-0.0318888	-0.0316032	-0.0471816	0.00399219
1.444	-0.601918	-0.499734	-0.474185	-0.398269	-0.248933	-0.0977715	-0.0309423	-0.0276325	-0.049678	-0.0128768
1.445	-0.60076	-0.499282	-0.472551	-0.396117	-0.249939	-0.100592	-0.0297925	-0.0235834	-0.0528335	-0.0263584
1.446	-0.599387	-0.499515	-0.470987	-0.39489	-0.250514	-0.103119	-0.0284528	-0.0193032	-0.056144	-0.0363032
1.447	-0.597853	-0.500341	-0.469422	-0.394634	-0.250527	-0.104843	-0.027201	-0.0145715	-0.0586455	-0.0428818
1.448	-0.596009	-0.501682	-0.467839	-0.395269	-0.249932	-0.105198	-0.0264645	-0.0091905	-0.0587721	-0.0464379
1.449	-0.593804	-0.503368	-0.466238	-0.396621	-0.2486	-0.103752	-0.026348	-0.00304941	-0.0548153	-0.0472359
1.45	-0.591438	-0.50496	-0.464568	-0.398346	-0.24638	-0.100421	-0.0264571	0.00389109	-0.0462534	-0.0454668
1.451	-0.589125	-0.505951	-0.462685	-0.400039	-0.243265	-0.0953742	-0.026298	0.0115235	-0.0343777	-0.0415346
1.452	-0.58702	-0.506081	-0.460473	-0.401335	-0.239269	-0.088807	-0.025681	0.0196055	-0.0210513	-0.0361179
1.453	-0.585282	-0.505367	-0.457949	-0.401867	-0.234321	-0.0807773	-0.0246255	0.0278743	-0.0073676	-0.0298705
1.454	-0.583951	-0.503903	-0.455272	-0.401244	-0.228584	-0.0709352	-0.023196	0.0359662	0.00631315	-0.0230795
1.455	-0.582924	-0.5017	-0.452693	-0.39923	-0.222599	-0.0582265	-0.0215692	0.0433869	0.0197706	-0.0153271
1.456	-0.582101	-0.498805	-0.45036	-0.395943	-0.21701	-0.0410364	-0.0199811	0.0497958	0.0323211	-0.00546355
1.457	-0.581438	-0.495402	-0.448191	-0.391763	-0.212296	-0.0182343	-0.0185078	0.0552541	0.0426718	0.00788717
1.458	-0.580853	-0.491741	-0.44609	-0.387169	-0.208695	0.00952197	-0.0171011	0.0600508	0.0496041	0.025837
1.459	-0.58019	-0.488123	-0.444088	-0.382691	-0.206316	0.0397182	-0.0159992	0.0642658	0.0527624	0.0487905
1.46	-0.57931	-0.484804	-0.442157	-0.378853	-0.205346	0.0692234	-0.0158079	0.0678781	0.0526514	0.0761073
1.461	-0.578092	-0.48182	-0.440107	-0.376115	-0.20594	0.0955886	-0.0168385	0.0712727	0.0498684	0.106472
1.462	-0.576466	-0.479037	-0.437861	-0.374772	-0.207995	0.117987	-0.0187688	0.0748415	0.0447719	0.138492
1.463	-0.574553	-0.47636	-0.435689	-0.374724	-0.211029	0.137601	-0.021254	0.07807	0.0379607	0.1705
1.464	-0.572535	-0.473854	-0.433906	-0.37558	-0.214134	0.156715	-0.0243659	0.0796478	0.0303157	0.199883
1.465	-0.570485	-0.471627	-0.432503	-0.377103	-0.21614	0.177129	-0.0282777	0.0784319	0.0223925	0.223181
1.466	-0.568433	-0.469613	-0.431422	-0.379292	-0.216096	0.199366	-0.0329127	0.0740715	0.0144196	0.236997
1.467	-0.566456	-0.467726	-0.430771	-0.38201	-0.213974	0.222862	-0.0380214	0.0670154	0.00686917	0.238951
1.468	-0.564633	-0.466064	-0.430552	-0.384862	-0.210871	0.246369	-0.043477	0.0582807	0.00032827	0.228401
1.469	-0.562991	-0.464684	-0.430511	-0.387547	-0.208262	0.268291	-0.0493563	0.049055	-0.00510775	0.206528
1.47	-0.561526	-0.463462	-0.430336	-0.390058	-0.207121	0.286983	-0.0556435	0.0403501	-0.00983936	0.175834
1.471	-0.560198	-0.462311	-0.429813	-0.392423	-0.207621	0.300739	-0.062	0.0328987	-0.0143048	0.13968
1.472	-0.558984	-0.461248	-0.428876	-0.39445	-0.2094	0.307797	-0.0678712	0.0270944	-0.0187658	0.101679
1.473	-0.557901	-0.460249	-0.427626	-0.395801	-0.211897	0.306792	-0.0725553	0.0229928	-0.023336	0.0649448
1.474	-0.556957	-0.459143	-0.426188	-0.396208	-0.214407	0.297001	-0.0753315	0.020489	-0.0278632	0.0317833
1.475	-0.556121	-0.457649	-0.424563	-0.395461	-0.216293	0.278339	-0.0759316	0.0194659	-0.0319972	0.00382777
1.476	-0.555273	-0.455501	-0.422698	-0.393418	-0.217248	0.251514	-0.0747065	0.0196816	-0.0355938	-0.0179624
1.477	-0.554216	-0.452587	-0.420609	-0.390124	-0.217242	0.218026	-0.0720987	0.0205032	-0.0387351	-0.0335283
1.478	-0.552731	-0.449023	-0.418462	-0.385792	-0.216473	0.179894	-0.0682732	0.0209577	-0.0414166	-0.0436339
1.479	-0.550705	-0.445118	-0.416624	-0.380723	-0.215253	0.139291	-0.0634302	0.0202933	-0.0434214	-0.0494241
1.48	-0.548202	-0.441222	-0.415546	-0.375375	-0.213804	0.098319	-0.0581803	0.0183535	-0.044328	-0.0520733
1.481	-0.545312	-0.437579	-0.415667	-0.370375	-0.212373	0.0589994	-0.0533945	0.015276	-0.0436554	-0.0525944
1.482	-0.542101	-0.434234	-0.417302	-0.366315	-0.211383	0.0231324	-0.0498058	0.011074	-0.0413685	-0.0516682
1.483	-0.538724	-0.431015	-0.420384	-0.363608	-0.211225	-0.00795053	-0.0478703	0.00571598	-0.0382216	-0.0495705
1.484	-0.535459	-0.427838	-0.424308	-0.362387	-0.212045	-0.0335536	-0.0478077	-0.000557221	-0.0353438	-0.0464261
1.485	-0.53254	-0.424971	-0.428168	-0.362488	-0.213842	-0.053592	-0.0495578	-0.00731531	-0.033647	-0.0426258
1.486	-0.529961	-0.422863	-0.431164	-0.363638	-0.216512	-0.0683393	-0.0527481	-0.014159	-0.0336369	-0.0388532
1.487	-0.527631	-0.421727	-0.43284	-0.365601	-0.219675	-0.0781536	-0.0568497	-0.0205948	-0.035503	-0.0356667
1.488	-0.525587	-0.421351	-0.433115	-0.368012	-0.222664	-0.0832862	-0.0613041	-0.0261257	-0.0391203	-0.0333027
1.489	-0.523903	-0.421421	-0.431977	-0.370248	-0.224785	-0.0839399	-0.0654677	-0.0305511	-0.0439804	-0.031879
1.49	-0.522518	-0.421771	-0.429193	-0.371664	-0.22562	-0.0806633	-0.068671	-0.0339547	-0.0494034	-0.0313646
1.491	-0.521213	-0.422273	-0.424748	-0.371897	-0.225093	-0.0744467	-0.0703954	-0.0366354	-0.0548295	-0.0315216
1.492	-0.519702	-0.42273	-0.419231	-0.370894	-0.223155	-0.0663533	-0.0702692	-0.0389169	-0.0598865	-0.0321918
1.493	-0.517843	-0.422988	-0.413383	-0.368674	-0.219625	-0.0572311	-0.0681554	-0.0408357	-0.0641316	-0.0333211
1.494	-0.515766	-0.423061	-0.407667	-0.365094	-0.214605	-0.0476856	-0.0643384	-0.0421904	-0.0667198	-0.0347334
1.495	-0.513775	-0.423015	-0.402353	-0.360133	-0.20869	-0.0382249	-0.0594279	-0.0427819	-0.0666856	-0.0361128
1.496	-0.512124	-0.422837	-0.397626	-0.354277	-0.20253	-0.0293497	-0.0540061	-0.0424235	-0.0636073	-0.0371048
1.497	-0.510839	-0.422519	-0.393551	-0.348296	-0.19638	-0.0215344	-0.0482854	-0.0408236	-0.0576759	-0.0374799
1.498	-0.509711	-0.42215	-0.390148	-0.342751	-0.190129	-0.0152838	-0.0422603	-0.0370642	-0.0491348	-0.0372607
1.499	-0.508392	-0.421785	-0.387502	-0.337858	-0.18346	-0.0111772	-0.0360974	-0.0286758	-0.0380355	-0.0365443
1.5	-0.506722	-0.421288	-0.385615	-0.333657	-0.176116	-0.00970185	-0.0301835	-0.0120098	-0.0245869	-0.0352444
1.501	-0.504914	-0.420428	-0.384339	-0.330107	-0.168549	-0.0109924	-0.0248907	0.0158579	-0.00940287	-0.0331545
1.502	-0.503183	-0.419128	-0.383514	-0.327184	-0.162075	-0.0146621	-0.0203488	0.0556414	0.00657795	-0.0298286
1.503	-0.501533	-0.417573	-0.38301	-0.324883	-0.158074	-0.0199742	-0.0166423	0.105661	0.0223303	-0.0240398
1.504	-0.499902	-0.416029	-0.382776	-0.32317	-0.157219	-0.0263247	-0.0141805	0.162565	0.0369853	-0.0140619
1.505	-0.498269	-0.414604	-0.382834	-0.322213	-0.159339	-0.0333452	-0.0134732	0.222078	0.049778	0.00112092
1.506	-0.496687	-0.413178	-0.383082	-0.322455	-0.163731	-0.0405903	-0.014409	0.279611	0.0599198	0.0215016
1.507	-0.495247	-0.411538	-0.383271	-0.324163	-0.169416	-0.047525	-0.0162276	0.331036	0.0669251	0.0468703
1.508	-0.493917	-0.409728	-0.383112	-0.327063	-0.175424	-0.053779	-0.0183966	0.373217	0.0709139	0.0771658
1.509	-0.49255	-0.408027	-0.382409	-0.330696	-0.181171	-0.0592902	-0.0209302	0.40433	0.0721719	0.111941
1.51	-0.490999	-0.406505	-0.381266	-0.334983	-0.186422	-0.06419	-0.0238056	0.424138	0.0707359	0.1499
1.511	-0.489146	-0.404941	-0.380039	-0.339931	-0.190811	-0.0685098	-0.0265952	0.433476	0.0667377	0.189112
1.512	-0.486987	-0.403123	-0.379008	-0.345019	-0.193716	-0.0720595	-0.0288448	0.432957	0.0610325	0.227633
1.513	-0.484746	-0.401103	-0.378201	-0.349413	-0.194669	-0.0744717	-0.0306584	0.422438	0.0557891	0.26373
1.514	-0.482626	-0.3992	-0.377446	-0.352678	-0.193853	-0.0753417	-0.0325768	0.401697	0.0545394	0.295709
1.515	-0.480677	-0.397672	-0.376578	-0.355113	-0.192101	-0.0744722	-0.0348661	0.371232	0.0613818	0.321616
1.516	-0.479042	-0.396567	-0.375625	-0.357259	-0.190328	-0.0719425	-0.0373249	0.332452	0.0800647	0.338973
1.517	-0.477934	-0.395949	-0.374725	-0.359289	-0.189145	-0.0679999	-0.0397219	0.287192	0.112961	0.345326
1.518	-0.477451	-0.395967	-0.37402	-0.361107	-0.188901	-0.0629507	-0.042049	0.237246	0.159864	0.339247
1.519	-0.477597	-0.396689	-0.373646	-0.362573	-0.189791	-0.0571354	-0.0443758	0.184293	0.217739	0.320729
1.52	-0.478257	-0.397875	-0.373712	-0.363559	-0.191755	-0.0510841	-0.0466631	0.130061	0.281746	0.290955
1.521	-0.479218	-0.398989	-0.374162	-0.364104	-0.194365	-0.045528	-0.0487538	0.0766595	0.34662	0.252009
1.522	-0.480327	-0.399637	-0.374754	-0.364214	-0.19706	-0.0410029	-0.0504315	0.0265951	0.40739	0.206793
1.523	-0.481486	-0.399839	-0.375152	-0.363612	-0.199499	-0.0376161	-0.0515758	-0.0176736	0.459473	0.158703
1.524	-0.482523	-0.399749	-0.375036	-0.362087	-0.201677	-0.035213	-0.0523487	-0.0543534	0.499033	0.111055
1.525	-0.483276	-0.399398	-0.374292	-0.359845	-0.203833	-0.0335237	-0.0530756	-0.0827734	0.523467	0.0666748
1.526	-0.483661	-0.398652	-0.373009	-0.357362	-0.20609	-0.0322221	-0.0539114	-0.103234	0.531334	0.027602
1.527	-0.483487	-0.39734	-0.37128	-0.355019	-0.208169	-0.0310239	-0.0545611	-0.116336	0.522184	-0.00516816
1.528	-0.482449	-0.395457	-0.369182	-0.352891	-0.209603	-0.0297548	-0.0543424	-0.122575	0.496606	-0.0315947
1.529	-0.480382	-0.393172	-0.36687	-0.350828	-0.210005	-0.0282207	-0.0527487	-0.122618	0.456217	-0.0519609
1.53	-0.477322	-0.390659	-0.364487	-0.348682	-0.209169	-0.0262162	-0.0498543	-0.117552	0.403532	-0.066297
1.531	-0.473367	-0.388061	-0.362089	-0.346436	-0.207172	-0.0238562	-0.0461002	-0.108637	0.341633	-0.0745272
1.532	-0.46869	-0.385402	-0.35977	-0.34419	-0.204177	-0.0215335	-0.0417578	-0.0969809	0.273739	-0.0771475
1.533	-0.463614	-0.382503	-0.357666	-0.34195	-0.200112	-0.0194873	-0.0367303	-0.0835175	0.203199	-0.0753719
1.534	-0.458592	-0.379292	-0.355744	-0.339352	-0.194968	-0.0176116	-0.0310463	-0.0692623	0.133721	-0.0705097
1.535	-0.454099	-0.375956	-0.353691	-0.335914	-0.189262	-0.0157522	-0.0251809	-0.055507	0.0690906	-0.0636163
1.536	-0.450469	-0.372672	-0.351184	-0.331516	-0.183843	-0.0141412	-0.0197543	-0.0435077	0.0124181	-0.055724
1.537	-0.447752	-0.369499	-0.348418	-0.326369	-0.179395	-0.0132974	-0.0152297	-0.0340113	-0.03443	-0.0479765
1.538	-0.445831	-0.36649	-0.346064	-0.320664	-0.176186	-0.0137009	-0.0118329	-0.0271393	-0.0708317	-0.0413567
1.539	-0.44462	-0.363832	-0.344608	-0.314508	-0.174104	-0.0155774	-0.00954834	-0.0225106	-0.0969424	-0.0364664
1.54	-0.44408	-0.361857	-0.344047	-0.308222	-0.173027	-0.0187459	-0.00814501	-0.019532	-0.113383	-0.0335321
1.541	-0.444132	-0.360779	-0.344228	-0.302366	-0.173137	-0.0228512	-0.00739171	-0.0178561	-0.121432	-0.0323752
1.542	-0.444574	-0.360554	-0.345087	-0.297413	-0.174664	-0.0276345	-0.00727983	-0.0175566	-0.123128	-0.0324996
1.543	-0.445112	-0.361028	-0.346542	-0.293673	-0.177626	-0.0329698	-0.00782064	-0.0187892	-0.120716	-0.0333699
1.544	-0.445522	-0.362066	-0.348468	-0.291388	-0.181788	-0.0388984	-0.008831	-0.0215238	-0.115981	-0.034643
1.545	-0.445743	-0.363614	-0.350712	-0.290662	-0.186621	-0.0455903	-0.0101563	-0.025578	-0.110167	-0.0361783
1.546	-0.445817	-0.365625	-0.353139	-0.291446	-0.19152	-0.0532142	-0.0118478	-0.0306568	-0.10419	-0.0379001
1.547	-0.445773	-0.367918	-0.355785	-0.293647	-0.196047	-0.061797	-0.013918	-0.0361185	-0.0987214	-0.039788
1.548	-0.445596	-0.370183	-0.358714	-0.29701	-0.199946	-0.0712467	-0.0161308	-0.0404058	-0.0942302	-0.0419311
1.549	-0.445238	-0.372203	-0.361732	-0.301043	-0.203083	-0.0814847	-0.0183118	-0.0407775	-0.0910095	-0.0444368
1.55	-0.444619	-0.37397	-0.364411	-0.305224	-0.205427	-0.0924319	-0.0206138	-0.0340382	-0.0890742	-0.0473659
1.551	-0.443674	-0.3755	-0.366281	-0.30905	-0.207148	-0.103789	-0.023259	-0.0182587	-0.0880823	-0.0507109
1.552	-0.442414	-0.376731	-0.36694	-0.312017	-0.208493	-0.11478	-0.0263058	0.00611027	-0.0875446	-0.0543192
1.553	-0.440921	-0.377641	-0.366186	-0.313723	-0.20959	-0.124242	-0.0296864	0.0369952	-0.0871999	-0.0579462
1.554	-0.439322	-0.378263	-0.364125	-0.313949	-0.21031	-0.131083	-0.0332711	0.0718905	-0.0870465	-0.0613199
1.555	-0.437832	-0.378525	-0.361018	-0.312767	-0.210032	-0.134655	-0.0367581	0.108091	-0.087135	-0.0641
1.556	-0.436687	-0.378198	-0.357133	-0.310526	-0.207728	-0.134754	-0.0396572	0.142271	-0.0875536	-0.0660028
1.557	-0.435923	-0.377103	-0.35278	-0.307511	-0.202739	-0.131394	-0.0415571	0.170587	-0.0883948	-0.0669294
1.558	-0.435382	-0.375268	-0.348257	-0.303741	-0.195586	-0.124692	-0.042241	0.189723	-0.0895428	-0.0667601
1.559	-0.434866	-0.372829	-0.343814	-0.299196	-0.187766	-0.114848	-0.0416825	0.197702	-0.0906721	-0.0652541
1.56	-0.43419	-0.369905	-0.33968	-0.294048	-0.180854	-0.102059	-0.0400701	0.193982	-0.0915344	-0.0623435
1.561	-0.433241	-0.366669	-0.336061	-0.288602	-0.176093	-0.0863994	-0.0377279	0.17944	-0.0920098	-0.0583117
1.562	-0.432084	-0.363448	-0.333088	-0.283173	-0.17433	-0.0674447	-0.0349699	0.156204	-0.0918909	-0.0535133
1.563	-0.430945	-0.360554	-0.330716	-0.278104	-0.175608	-0.0440762	-0.0320094	0.127163	-0.0909474	-0.0479457
1.564	-0.429939	-0.358036	-0.328741	-0.273749	-0.17899	-0.0155433	-0.0290484	0.0954606	-0.0891748	-0.0413047
1.565	-0.428851	-0.355704	-0.32692	-0.270346	-0.18322	0.0167711	-0.0263812	0.0640991	-0.0867421	-0.033443
1.566	-0.427346	-0.353256	-0.325088	-0.267991	-0.187144	0.0489523	-0.0242716	0.0355349	-0.0838108	-0.0245624
1.567	-0.425307	-0.350394	-0.323207	-0.266584	-0.189689	0.0760033	-0.0227007	0.0114008	-0.0805133	-0.0151838
1.568	-0.422915	-0.347	-0.32124	-0.265843	-0.190237	0.0937275	-0.0214416	-0.00748332	-0.0769574	-0.00608672
1.569	-0.4205	-0.343159	-0.319094	-0.265483	-0.188904	0.100236	-0.0203973	-0.0209841	-0.0732068	0.00197494
1.57	-0.418289	-0.339055	-0.316761	-0.26526	-0.186272	0.0964087	-0.0196114	-0.0296169	-0.0693127	0.00857486
1.571	-0.416312	-0.334899	-0.314433	-0.264912	-0.182944	0.0848276	-0.0190941	-0.0343777	-0.0654488	0.013545
1.572	-0.414577	-0.330947	-0.312404	-0.264172	-0.179254	0.0685343	-0.0187084	-0.0363814	-0.0619298	0.0167527
1.573	-0.413174	-0.327472	-0.310934	-0.262841	-0.175454	0.0504592	-0.0181807	-0.0366833	-0.0589286	0.0181502
1.574	-0.412171	-0.324674	-0.310205	-0.260903	-0.172022	0.0328283	-0.0174522	-0.0362885	-0.0564004	0.0179313
1.575	-0.411504	-0.322632	-0.310245	-0.258526	-0.169489	0.0167649	-0.0168899	-0.0360456	-0.054438	0.0164144
1.576	-0.411009	-0.321286	-0.310983	-0.256015	-0.168154	0.00277692	-0.0169125	-0.0364538	-0.0534811	0.0138389
1.577	-0.410613	-0.320463	-0.312338	-0.253903	-0.168161	-0.00864373	-0.0176484	-0.037641	-0.054071	0.0105789
1.578	-0.410388	-0.31997	-0.314124	-0.252794	-0.169489	-0.0171282	-0.0191268	-0.0395612	-0.0565025	0.0074222
1.579	-0.410357	-0.319679	-0.316092	-0.252996	-0.171858	-0.0226683	-0.0215056	-0.0420834	-0.0606981	0.00505026
1.58	-0.41035	-0.31962	-0.31801	-0.254496	-0.174896	-0.0254321	-0.0249878	-0.0448212	-0.0662408	0.00334293
1.581	-0.410142	-0.319926	-0.31968	-0.257137	-0.178315	-0.0254794	-0.029618	-0.0471551	-0.0724879	0.00160291
1.582	-0.409713	-0.320649	-0.321013	-0.26061	-0.181864	-0.0228269	-0.0351911	-0.0486083	-0.0786767	-0.000828358
1.583	-0.409254	-0.321685	-0.321943	-0.264595	-0.185343	-0.0178129	-0.041349	-0.0489491	-0.0839888	-0.0042662
1.584	-0.408981	-0.322891	-0.322287	-0.268881	-0.188675	-0.0112475	-0.0476058	-0.0478975	-0.0877586	-0.0086556
1.585	-0.408969	-0.324146	-0.321952	-0.273179	-0.191808	-0.00405999	-0.0533451	-0.0451877	-0.0896343	-0.0138444
1.586	-0.409144	-0.325291	-0.321103	-0.277158	-0.194556	0.00293478	-0.0581388	-0.0410683	-0.0894891	-0.0197597
1.587	-0.409402	-0.326089	-0.319893	-0.280558	-0.196688	0.00900449	-0.0619673	-0.036374	-0.087332	-0.0262127
1.588	-0.409584	-0.326329	-0.318352	-0.283052	-0.198068	0.0137435	-0.0648911	-0.0319496	-0.0832342	-0.0328292
1.589	-0.409428	-0.32591	-0.316496	-0.284272	-0.198548	0.0171715	-0.0667825	-0.0282258	-0.0773317	-0.0392603
1.59	-0.408769	-0.324774	-0.314306	-0.283932	-0.198003	0.0195035	-0.0675394	-0.0252909	-0.0700586	-0.0452999
1.591	-0.407666	-0.32295	-0.311869	-0.281893	-0.196466	0.0210914	-0.0673429	-0.0230684	-0.062169	-0.0507693
1.592	-0.406169	-0.320559	-0.309417	-0.278245	-0.194086	0.0223779	-0.0665586	-0.0214179	-0.0543782	-0.0554755
1.593	-0.404247	-0.317709	-0.307114	-0.273302	-0.191028	0.0236242	-0.0654161	-0.0201224	-0.0471198	-0.0592285
1.594	-0.402014	-0.314558	-0.305025	-0.267496	-0.187458	0.0247353	-0.0638647	-0.0189048	-0.0405841	-0.0617765
1.595	-0.399711	-0.311372	-0.303175	-0.261291	-0.183499	0.0254611	-0.061747	-0.0175539	-0.0348456	-0.0629007
1.596	-0.397537	-0.308477	-0.301564	-0.255142	-0.179189	0.0256706	-0.0590605	-0.015944	-0.0299397	-0.0624806
1.597	-0.395605	-0.306252	-0.300156	-0.249441	-0.174603	0.025329	-0.0560682	-0.0140436	-0.025791	-0.0604744
1.598	-0.393932	-0.304909	-0.298886	-0.244531	-0.169934	0.024441	-0.0531095	-0.0120223	-0.0220431	-0.0571017
1.599	-0.392464	-0.304242	-0.297762	-0.24082	-0.165241	0.0230999	-0.0502958	-0.0102738	-0.0182109	-0.0529225
1.6	-0.391157	-0.303901	-0.296861	-0.238593	-0.160181	0.0213881	-0.0475699	-0.00924006	-0.0141695	-0.0485329
1.601	-0.390037	-0.303804	-0.296271	-0.237739	-0.154192	0.0193433	-0.0449784	-0.00921312	-0.0101629	-0.0442213
1.602	-0.389173	-0.304034	-0.296011	-0.237945	-0.147219	0.0171553	-0.0427026	-0.0103647	-0.00630917	-0.0399574
1.603	-0.388611	-0.304493	-0.295913	-0.238992	-0.140379	0.0152426	-0.0409009	-0.0126485	-0.00256284	-0.0356404
1.604	-0.388361	-0.304936	-0.295689	-0.240739	-0.135486	0.0140713	-0.0396316	-0.0156167	0.000902431	-0.0312093
1.605	-0.388396	-0.305194	-0.295192	-0.243006	-0.133951	0.013968	-0.0388541	-0.0187072	0.00364902	-0.0265135
1.606	-0.388627	-0.305105	-0.294515	-0.245574	-0.1362	0.0151607	-0.0385278	-0.0215146	0.00526682	-0.0213664
1.607	-0.388921	-0.304612	-0.293856	-0.248258	-0.141505	0.0178489	-0.0387183	-0.0237296	0.00550457	-0.0157307
1.608	-0.389242	-0.303934	-0.293388	-0.25094	-0.148339	0.0221297	-0.0394049	-0.025135	0.00422819	-0.00970564
1.609	-0.389724	-0.303349	-0.293061	-0.253505	-0.155152	0.0280286	-0.0403165	-0.0256586	0.00148556	-0.00348068
1.61	-0.390484	-0.302986	-0.292714	-0.255787	-0.160891	0.0354961	-0.0411207	-0.0254313	-0.00251414	0.00272741
1.611	-0.391422	-0.302853	-0.292385	-0.257547	-0.165138	0.0444205	-0.0416294	-0.0246958	-0.00754512	0.00872808
1.612	-0.392269	-0.302939	-0.292246	-0.258584	-0.167869	0.05514	-0.0416594	-0.0235524	-0.0132759	0.0142793
1.613	-0.392783	-0.303247	-0.29237	-0.258872	-0.169135	0.0687694	-0.0409447	-0.0219586	-0.0191663	0.019136
1.614	-0.392903	-0.303652	-0.29261	-0.25844	-0.169226	0.0864341	-0.0395899	-0.0199305	-0.0246895	0.0231971
1.615	-0.392646	-0.303889	-0.29267	-0.257424	-0.168747	0.107757	-0.0382704	-0.0176191	-0.0296271	0.0263477
1.616	-0.391977	-0.303755	-0.292384	-0.256281	-0.168041	0.129805	-0.0375265	-0.0152038	-0.0339933	0.0282591
1.617	-0.390965	-0.30316	-0.291792	-0.255456	-0.166859	0.147866	-0.0371535	-0.0126546	-0.0376646	0.0285762
1.618	-0.389797	-0.302087	-0.290865	-0.254972	-0.164981	0.157651	-0.0366022	-0.00964112	-0.0404285	0.027266
1.619	-0.388597	-0.300601	-0.2894	-0.254599	-0.162749	0.156881	-0.0357058	-0.00573244	-0.0423227	0.0248265
1.62	-0.387407	-0.298717	-0.287256	-0.25415	-0.160726	0.145917	-0.0346868	-0.000722253	-0.0435439	0.0221118
1.621	-0.386177	-0.296303	-0.284543	-0.253604	-0.159229	0.127801	-0.033611	0.00521611	-0.0441963	0.0198535
1.622	-0.384811	-0.293265	-0.281598	-0.253059	-0.158248	0.106635	-0.0322216	0.0116575	-0.044264	0.0183985
1.623	-0.383325	-0.289756	-0.278851	-0.252521	-0.157497	0.0851959	-0.0303083	0.0181068	-0.0435426	0.0176981
1.624	-0.381769	-0.286139	-0.276631	-0.251813	-0.156622	0.0646137	-0.0278524	0.0240909	-0.0415111	0.0173936
1.625	-0.380074	-0.282782	-0.275042	-0.250791	-0.155576	0.0457272	-0.0248297	0.0290791	-0.0376507	0.0171222
1.626	-0.37819	-0.279928	-0.274068	-0.249533	-0.154613	0.0294834	-0.0213151	0.0325933	-0.0319513	0.0167518
1.627	-0.37625	-0.277676	-0.273708	-0.248334	-0.153894	0.016281	-0.0176399	0.0347032	-0.0249426	0.0162599
1.628	-0.374462	-0.276014	-0.273923	-0.247526	-0.153416	0.00584813	-0.0140542	0.0359074	-0.0173672	0.0156106
1.629	-0.372919	-0.274924	-0.274617	-0.247251	-0.153139	-0.00224283	-0.0104741	0.036366	-0.00991672	0.014762
1.63	-0.371638	-0.274459	-0.275737	-0.247497	-0.152974	-0.00827726	-0.00694098	0.0357519	-0.00325521	0.013683
1.631	-0.370699	-0.274736	-0.277247	-0.248223	-0.152801	-0.012404	-0.00400644	0.0336107	0.00201276	0.0124611
1.632	-0.370195	-0.275782	-0.278951	-0.249325	-0.152578	-0.014753	-0.00225418	0.0295829	0.00558694	0.0117775
1.633	-0.370094	-0.277425	-0.280531	-0.250653	-0.152487	-0.0157225	-0.00178001	0.0236516	0.00754529	0.0137619
1.634	-0.370266	-0.279346	-0.281724	-0.252055	-0.152831	-0.0160276	-0.00236656	0.0162166	0.00819034	0.0219441
1.635	-0.3706	-0.281227	-0.282254	-0.253341	-0.153681	-0.0162346	-0.00389296	0.00786572	0.00787834	0.0397027
1.636	-0.371062	-0.282931	-0.281852	-0.254334	-0.154905	-0.0164834	-0.00637652	-0.000767517	0.00696462	0.0689454
1.637	-0.371582	-0.284462	-0.280525	-0.254999	-0.15651	-0.0166488	-0.00963983	-0.00904503	0.00578484	0.110016
1.638	-0.371964	-0.285779	-0.278638	-0.255451	-0.158556	-0.0164537	-0.0131862	-0.0163763	0.00449221	0.16188
1.639	-0.372042	-0.28678	-0.276558	-0.255804	-0.160743	-0.0154973	-0.0164464	-0.0222791	0.00305836	0.222126
1.64	-0.371794	-0.287393	-0.274386	-0.255965	-0.162516	-0.013359	-0.0189549	-0.0264455	0.00156846	0.287186
1.641	-0.37119	-0.287575	-0.272145	-0.255582	-0.163567	-0.00986116	-0.0203153	-0.0287605	0.000157934	0.352888
1.642	-0.370097	-0.287291	-0.269976	-0.254379	-0.163813	-0.00536218	-0.0202774	-0.029344	-0.00127484	0.415068
1.643	-0.368489	-0.286522	-0.268008	-0.252386	-0.163012	-0.000609433	-0.0188901	-0.0284761	-0.00291756	0.469727
1.644	-0.366502	-0.285324	-0.266205	-0.249748	-0.160829	0.00374424	-0.0162678	-0.0264328	-0.0047077	0.512976
1.645	-0.364303	-0.283867	-0.264539	-0.246433	-0.157179	0.00731171	-0.0124034	-0.0236518	-0.00602266	0.541743
1.646	-0.361974	-0.282249	-0.263072	-0.24231	-0.152287	0.00981427	-0.0075353	-0.0209102	-0.00512106	0.554781
1.647	-0.359428	-0.280412	-0.261921	-0.237409	-0.146252	0.0110451	-0.00232288	-0.0190785	0.00101494	0.552657
1.648	-0.356526	-0.278332	-0.261285	-0.232054	-0.138722	0.010871	0.00258656	-0.0188054	0.0157388	0.536994
1.649	-0.353365	-0.276098	-0.261317	-0.226828	-0.129735	0.00910432	0.00687532	-0.0202693	0.0416103	0.509607
1.65	-0.350289	-0.273814	-0.262002	-0.222229	-0.120391	0.00553895	0.0102995	-0.0224849	0.07965	0.471824
1.651	-0.347659	-0.271577	-0.263218	-0.218422	-0.112046	0.000312883	0.0124379	-0.0226262	0.128676	0.424642
1.652	-0.345794	-0.269481	-0.264716	-0.215527	-0.105382	-0.00580101	0.0130572	-0.0168555	0.185325	0.369446
1.653	-0.344932	-0.26757	-0.266186	-0.213821	-0.100377	-0.0116907	0.0124451	-0.00194985	0.245032	0.308413
1.654	-0.345048	-0.265872	-0.267396	-0.213512	-0.0970663	-0.0164551	0.0109166	0.0237463	0.303076	0.244499
1.655	-0.345851	-0.264461	-0.268191	-0.214586	-0.0962853	-0.0195194	0.00835882	0.0595694	0.355201	0.181004
1.656	-0.34699	-0.263483	-0.268479	-0.216918	-0.099394	-0.0205881	0.00478041	0.102361	0.39819	0.120763
1.657	-0.348142	-0.263108	-0.268274	-0.220249	-0.107269	-0.0198111	0.000864465	0.147761	0.430621	0.0656781
1.658	-0.349016	-0.263344	-0.26781	-0.224151	-0.119617	-0.0176456	-0.00255332	0.191734	0.453103	0.0168806
1.659	-0.349455	-0.263963	-0.267415	-0.228101	-0.134922	-0.0143655	-0.00515649	0.231054	0.467519	-0.0250622
1.66	-0.349595	-0.264729	-0.267124	-0.231561	-0.150925	-0.0100032	-0.00697381	0.26343	0.476287	-0.0599731
1.661	-0.349732	-0.265576	-0.266737	-0.234164	-0.165493	-0.00463833	-0.00808438	0.287886	0.482058	-0.0879187
1.662	-0.349949	-0.266537	-0.266105	-0.235848	-0.177319	0.0016783	-0.00882502	0.304748	0.486976	-0.109162
1.663	-0.350073	-0.267626	-0.265197	-0.236797	-0.185923	0.00909535	-0.00978794	0.315017	0.491266	-0.12413
1.664	-0.349926	-0.268859	-0.264109	-0.237394	-0.191283	0.0177741	-0.011343	0.31978	0.492605	-0.133447
1.665	-0.349444	-0.270226	-0.262914	-0.237907	-0.193705	0.0276062	-0.0134124	0.320004	0.487459	-0.137837
1.666	-0.348694	-0.271588	-0.26158	-0.23827	-0.193741	0.0381469	-0.0158079	0.316713	0.472921	-0.137903
1.667	-0.347816	-0.272765	-0.260051	-0.238319	-0.191877	0.0489047	-0.0185144	0.311145	0.447618	-0.134268
1.668	-0.346951	-0.273601	-0.258272	-0.237867	-0.188581	0.0596974	-0.0213897	0.304214	0.411884	-0.127728
1.669	-0.346261	-0.273872	-0.256191	-0.236704	-0.184549	0.0705609	-0.0239253	0.296011	0.367403	-0.119032
1.67	-0.345812	-0.273386	-0.253825	-0.234798	-0.180418	0.0813709	-0.0256752	0.286462	0.316428	-0.108716
1.671	-0.345464	-0.27212	-0.251274	-0.232304	-0.176475	0.0917108	-0.0265377	0.276177	0.261056	-0.0972382
1.672	-0.345071	-0.270109	-0.248638	-0.229385	-0.172821	0.101138	-0.0263735	0.266206	0.20318	-0.0851292
1.673	-0.344534	-0.267358	-0.246048	-0.226076	-0.169485	0.11015	-0.0249443	0.257357	0.14496	-0.0730626
1.674	-0.34367	-0.263894	-0.24372	-0.222399	-0.166401	0.120997	-0.0222828	0.249714	0.088786	-0.0618038
1.675	-0.342396	-0.259797	-0.241851	-0.218498	-0.163545	0.135939	-0.0186488	0.242343	0.0366951	-0.0519419
1.676	-0.340872	-0.255287	-0.240583	-0.214513	-0.160989	0.154221	-0.0143922	0.233626	-0.00982132	-0.04379
1.677	-0.339253	-0.250683	-0.239975	-0.210458	-0.158804	0.17183	-0.00997052	0.222089	-0.0497905	-0.0375248
1.678	-0.337549	-0.246259	-0.240071	-0.206382	-0.156974	0.183761	-0.00568541	0.206961	-0.0827836	-0.033113
1.679	-0.335749	-0.24231	-0.241035	-0.202479	-0.155303	0.186015	-0.00149774	0.188288	-0.108707	-0.0302636
1.68	-0.333911	-0.239185	-0.242861	-0.199016	-0.153601	0.176628	0.00261796	0.166864	-0.127738	-0.0287364
1.681	-0.332138	-0.237067	-0.245068	-0.19629	-0.151914	0.156051	0.00639386	0.14432	-0.140543	-0.0285008
1.682	-0.330525	-0.235985	-0.247026	-0.194488	-0.150293	0.126585	0.00952014	0.123306	-0.148033	-0.0295417
1.683	-0.329169	-0.235963	-0.248239	-0.193519	-0.148619	0.0915103	0.0119283	0.107052	-0.150858	-0.0316511
1.684	-0.328168	-0.236907	-0.248362	-0.193152	-0.146825	0.0545957	0.0137225	0.0982878	-0.149495	-0.0343409
1.685	-0.327566	-0.238501	-0.247386	-0.193185	-0.14502	0.0194339	0.0148591	0.0985357	-0.144641	-0.0370409
1.686	-0.327334	-0.240357	-0.245668	-0.193444	-0.143442	-0.0110895	0.0150927	0.108151	-0.137218	-0.0393578
1.687	-0.327381	-0.24214	-0.243581	-0.193719	-0.14245	-0.0348397	0.0144757	0.126201	-0.128298	-0.0410251
1.688	-0.327592	-0.243609	-0.241336	-0.193864	-0.142241	-0.0505486	0.0134934	0.149894	-0.119052	-0.0418204
1.689	-0.327847	-0.244659	-0.239049	-0.193937	-0.142542	-0.057984	0.0125685	0.174624	-0.110388	-0.0415659
1.69	-0.327936	-0.245205	-0.236764	-0.194018	-0.142892	-0.0579284	0.0119172	0.19537	-0.102784	-0.0402405
1.691	-0.327643	-0.245094	-0.234552	-0.194072	-0.142914	-0.0519347	0.0117991	0.208137	-0.0964972	-0.0381337
1.692	-0.326922	-0.244207	-0.232647	-0.193954	-0.142251	-0.0417612	0.0124641	0.210373	-0.0916742	-0.0356384
1.693	-0.325813	-0.242608	-0.231226	-0.193399	-0.140654	-0.0288622	0.0138393	0.201166	-0.0883255	-0.03293
1.694	-0.32424	-0.240586	-0.230206	-0.192241	-0.138006	-0.0146002	0.0156399	0.181322	-0.0863466	-0.0300679
1.695	-0.322048	-0.238541	-0.229467	-0.190659	-0.13419	-0.000620838	0.0177079	0.152967	-0.085606	-0.0273147
1.696	-0.319238	-0.236826	-0.229029	-0.189052	-0.129408	0.0114453	0.0198972	0.119203	-0.086102	-0.0250918
1.697	-0.316069	-0.23568	-0.228928	-0.187696	-0.124396	0.0204689	0.0218747	0.0834489	-0.0877549	-0.0236923
1.698	-0.312908	-0.235194	-0.229069	-0.186699	-0.119951	0.0259871	0.0231394	0.0482755	-0.090151	-0.0232487
1.699	-0.31007	-0.235243	-0.229326	-0.186076	-0.116583	0.0281795	0.0231482	0.0151355	-0.0928848	-0.0238351
1.7	-0.307719	-0.23555	-0.229682	-0.185694	-0.114437	0.0276092	0.0216482	-0.0149292	-0.0956909	-0.0254453
1.701	-0.305903	-0.235913	-0.230132	-0.185499	-0.113281	0.0249062	0.0188205	-0.0409267	-0.0982201	-0.0279525
1.702	-0.304686	-0.236261	-0.230606	-0.185673	-0.112664	0.020715	0.0150209	-0.062201	-0.100103	-0.0311471
1.703	-0.304076	-0.236552	-0.231088	-0.186294	-0.111959	0.0156877	0.0106577	-0.0786607	-0.101002	-0.0348024
1.704	-0.304002	-0.236809	-0.231675	-0.187184	-0.110348	0.010474	0.00622135	-0.090617	-0.100583	-0.0387176
1.705	-0.304464	-0.237149	-0.232408	-0.188198	-0.107317	0.00573205	0.00209651	-0.0984987	-0.0986086	-0.042708
1.706	-0.305417	-0.237583	-0.233105	-0.18932	-0.102909	0.00198008	-0.00164673	-0.102686	-0.0950307	-0.0464949
1.707	-0.306634	-0.237931	-0.233563	-0.190481	-0.0971396	-0.000545193	-0.00514251	-0.103566	-0.0900562	-0.0497556
1.708	-0.307868	-0.237923	-0.2337	-0.191561	-0.0899464	-0.00196863	-0.00849204	-0.101686	-0.0841727	-0.0524462
1.709	-0.308974	-0.237343	-0.233487	-0.192434	-0.0819615	-0.00281555	-0.0116617	-0.0978175	-0.0779428	-0.0547981
1.71	-0.30981	-0.23618	-0.233079	-0.192937	-0.0746623	-0.0037743	-0.014444	-0.0929279	-0.0716577	-0.0569624
1.711	-0.31031	-0.234579	-0.23276	-0.193041	-0.0696685	-0.00535474	-0.0165908	-0.0879524	-0.0653154	-0.0589872
1.712	-0.31055	-0.232736	-0.232669	-0.192928	-0.0680642	-0.00780372	-0.0180761	-0.0833644	-0.0589365	-0.0609732
1.713	-0.310612	-0.230873	-0.232803	-0.192772	-0.0702502	-0.0110824	-0.0191031	-0.0790895	-0.0526701	-0.0629741
1.714	-0.310483	-0.229126	-0.233132	-0.192635	-0.0760443	-0.0148309	-0.019892	-0.0749493	-0.0466188	-0.0647482
1.715	-0.310043	-0.227492	-0.233586	-0.192641	-0.084825	-0.018545	-0.0205513	-0.0709454	-0.0408706	-0.0654181
1.716	-0.309171	-0.225952	-0.234024	-0.193104	-0.0957696	-0.0216646	-0.0210969	-0.0670717	-0.0356905	-0.0632657
1.717	-0.307963	-0.224544	-0.234253	-0.194284	-0.107936	-0.0234968	-0.0214991	-0.0632421	-0.0314291	-0.0562157
1.718	-0.306818	-0.223332	-0.234053	-0.196115	-0.12035	-0.0234055	-0.0216451	-0.0594422	-0.0282517	-0.0430276
1.719	-0.306216	-0.222369	-0.233167	-0.198284	-0.132208	-0.021092	-0.0212661	-0.0557555	-0.0260629	-0.0245993
1.72	-0.306393	-0.221681	-0.23137	-0.200394	-0.142907	-0.0165511	-0.0201546	-0.052223	-0.0245782	-0.00419974
1.721	-0.307327	-0.22129	-0.228679	-0.202054	-0.151981	-0.00989767	-0.0184686	-0.0487024	-0.023449	0.014002
1.722	-0.308866	-0.221193	-0.225497	-0.202927	-0.159028	-0.00138443	-0.0165197	-0.0450282	-0.0223241	0.0268716
1.723	-0.310743	-0.22128	-0.222355	-0.202767	-0.163789	0.00857222	-0.014351	-0.0411848	-0.0207838	0.0334131
1.724	-0.312634	-0.2213	-0.219491	-0.201568	-0.166362	0.0194878	-0.011807	-0.037169	-0.0186077	0.0347981
1.725	-0.314232	-0.220953	-0.216946	-0.199522	-0.167166	0.0308919	-0.00900685	-0.0330214	-0.0160623	0.0334801
1.726	-0.31524	-0.220128	-0.214905	-0.196842	-0.166822	0.0423112	-0.00630906	-0.0289515	-0.0136157	0.0318679
1.727	-0.315445	-0.218951	-0.213622	-0.193839	-0.165985	0.0532085	-0.00376852	-0.0251473	-0.0115534	0.0312689
1.728	-0.314852	-0.217499	-0.21318	-0.190857	-0.165001	0.0631378	-0.00119003	-0.0216614	-0.00994174	0.031787
1.729	-0.313682	-0.215705	-0.213376	-0.188084	-0.163889	0.071932	0.00123649	-0.0185672	-0.00882605	0.0330932
1.73	-0.312192	-0.213592	-0.213832	-0.185625	-0.162797	0.0795509	0.00290898	-0.0160592	-0.00826696	0.0349648
1.731	-0.310561	-0.211357	-0.214263	-0.183717	-0.162122	0.0859069	0.00352936	-0.0143678	-0.00822358	0.0370896
1.732	-0.308887	-0.209291	-0.21461	-0.182712	-0.162067	0.0909246	0.00317721	-0.0135558	-0.00852812	0.0389378
1.733	-0.307228	-0.207632	-0.214954	-0.182786	-0.162283	0.0945946	0.00180892	-0.0133797	-0.00883426	0.0400887
1.734	-0.305658	-0.206481	-0.215315	-0.183839	-0.161795	0.0969238	-0.0006257	-0.0134509	-0.00863291	0.0404451
1.735	-0.304199	-0.205893	-0.215564	-0.185656	-0.159059	0.0979168	-0.00384611	-0.0135353	-0.00755642	0.0399985
1.736	-0.302802	-0.205921	-0.215604	-0.188031	-0.152919	0.0977185	-0.0073526	-0.0135229	-0.00569608	0.0386564
1.737	-0.301466	-0.206489	-0.215516	-0.190763	-0.143959	0.0966966	-0.0108038	-0.0132726	-0.00352988	0.0364659
1.738	-0.30029	-0.207299	-0.215389	-0.193494	-0.134268	0.0952518	-0.0140709	-0.0127655	-0.00168051	0.0336653
1.739	-0.299436	-0.207963	-0.215153	-0.195743	-0.125869	0.0936582	-0.0168462	-0.0121821	-0.000730519	0.030547
1.74	-0.298967	-0.208257	-0.214823	-0.197308	-0.119651	0.0921185	-0.0186985	-0.0117234	-0.00091282	0.0275515
1.741	-0.298817	-0.208179	-0.214688	-0.198302	-0.115506	0.0908392	-0.0196236	-0.0115381	-0.00198403	0.0250436
1.742	-0.298968	-0.207868	-0.21498	-0.198854	-0.113252	0.0901096	-0.020048	-0.0116988	-0.00358138	0.0229921
1.743	-0.299398	-0.207572	-0.215589	-0.1992	-0.113045	0.0909454	-0.0203742	-0.0121307	-0.00565866	0.0212223
1.744	-0.299911	-0.20763	-0.216285	-0.199738	-0.114893	0.0956506	-0.0208849	-0.012637	-0.00852149	0.0194562
1.745	-0.300313	-0.208304	-0.216984	-0.200717	-0.118333	0.106999	-0.0218267	-0.0129581	-0.012463	0.0172427
1.746	-0.300613	-0.209581	-0.217696	-0.202155	-0.12275	0.127464	-0.0233802	-0.0128035	-0.0175056	0.0143613
1.747	-0.300899	-0.21123	-0.218374	-0.203971	-0.127706	0.158308	-0.0256372	-0.0119426	-0.0233962	0.010966
1.748	-0.301132	-0.213031	-0.218878	-0.206065	-0.132918	0.196683	-0.0285403	-0.0102568	-0.0297046	0.00754129
1.749	-0.301141	-0.214833	-0.219028	-0.208382	-0.138146	0.23514	-0.0318859	-0.00767839	-0.0360696	0.00493064
1.75	-0.300804	-0.216536	-0.21872	-0.210891	-0.143229	0.266409	-0.03534	-0.00420004	-0.0422437	0.00373664
1.751	-0.300079	-0.218117	-0.217994	-0.213495	-0.148031	0.286962	-0.0384196	-0.000115753	-0.0478888	0.00369205
1.752	-0.298958	-0.219602	-0.216929	-0.215951	-0.152249	0.296551	-0.0406364	0.00379856	-0.0525479	0.00398017
1.753	-0.297507	-0.22096	-0.215672	-0.217849	-0.155546	0.297307	-0.0416994	0.0067041	-0.0557256	0.00382695
1.754	-0.29586	-0.222096	-0.214484	-0.218711	-0.157726	0.292785	-0.0415367	0.008249	-0.057015	0.00278757
1.755	-0.294255	-0.222883	-0.213553	-0.218194	-0.158771	0.286583	-0.0401831	0.00844901	-0.056306	0.000864906
1.756	-0.292936	-0.22313	-0.212912	-0.216315	-0.158942	0.281484	-0.0378711	0.00735626	-0.0538737	-0.00160973
1.757	-0.291975	-0.2227	-0.212487	-0.213446	-0.158603	0.279186	-0.0350919	0.00512052	-0.0502973	-0.00429134
1.758	-0.29131	-0.221685	-0.212059	-0.210015	-0.157993	0.280178	-0.0322231	0.0021234	-0.0462328	-0.00690261
1.759	-0.29082	-0.220323	-0.211412	-0.206297	-0.157185	0.283635	-0.0292414	-0.00116764	-0.0422005	-0.00904554
1.76	-0.290371	-0.21886	-0.210503	-0.202505	-0.156072	0.287886	-0.025979	-0.0044138	-0.0385773	-0.0102264
1.761	-0.289865	-0.217441	-0.209313	-0.198835	-0.15452	0.291286	-0.0225004	-0.00739512	-0.0355926	-0.0100265
1.762	-0.289238	-0.216005	-0.207714	-0.195353	-0.152465	0.292419	-0.0189573	-0.00985778	-0.0332484	-0.00818461
1.763	-0.288393	-0.214353	-0.205591	-0.191947	-0.149875	0.289673	-0.0152443	-0.0116795	-0.031388	-0.00469313
1.764	-0.287121	-0.212244	-0.20297	-0.188459	-0.146769	0.28134	-0.0112223	-0.0130758	-0.0298212	0.000215273
1.765	-0.285277	-0.209483	-0.200084	-0.184842	-0.143259	0.266276	-0.00709987	-0.0141677	-0.0282331	0.00622273
1.766	-0.283017	-0.206035	-0.197267	-0.181105	-0.13945	0.244326	-0.00344052	-0.0146846	-0.0262003	0.0130499
1.767	-0.280643	-0.201987	-0.194763	-0.177302	-0.135457	0.216368	-0.000828606	-0.0143746	-0.0234976	0.0207705
1.768	-0.278362	-0.197498	-0.192664	-0.17379	-0.131619	0.184025	0.00060525	-0.013248	-0.0202063	0.0305124
1.769	-0.276319	-0.192921	-0.191001	-0.1712	-0.12809	0.149209	0.00119402	-0.0113211	-0.0165731	0.0444009
1.77	-0.274658	-0.18865	-0.189822	-0.169948	-0.124184	0.113897	0.00131482	-0.00850773	-0.0128153	0.0636679
1.771	-0.273448	-0.184864	-0.189063	-0.169975	-0.118858	0.0799902	0.00124335	-0.00494296	-0.0089569	0.086826
1.772	-0.272678	-0.181574	-0.188569	-0.170779	-0.111688	0.0490485	0.00129787	-0.00116328	-0.00486248	0.110394
1.773	-0.272306	-0.178787	-0.188327	-0.171575	-0.102763	0.0221901	0.00183624	0.00232219	-0.000435417	0.131129
1.774	-0.272267	-0.176563	-0.188438	-0.171621	-0.0922185	0.00020431	0.00306347	0.00547463	0.00419132	0.147315
1.775	-0.272462	-0.174946	-0.188871	-0.170535	-0.0811038	-0.0164737	0.00488241	0.00844456	0.00863555	0.158911
1.776	-0.272667	-0.173987	-0.189369	-0.16836	-0.0717955	-0.0278081	0.00703451	0.0110574	0.0123497	0.167321
1.777	-0.272547	-0.173692	-0.18959	-0.165309	-0.0662062	-0.0342153	0.00944986	0.012868	0.0147333	0.17489
1.778	-0.271931	-0.173866	-0.189414	-0.161517	-0.0643949	-0.036809	0.0123025	0.0135434	0.0154067	0.183992
1.779	-0.27094	-0.174211	-0.18913	-0.157113	-0.0650061	-0.0372189	0.0157225	0.0128849	0.0144526	0.196038
1.78	-0.269856	-0.174563	-0.189101	-0.152392	-0.0660699	-0.0370035	0.0195789	0.0106791	0.0123191	0.210958
1.781	-0.268914	-0.175	-0.189398	-0.147757	-0.0656179	-0.0375165	0.023447	0.00689131	0.0096193	0.22714
1.782	-0.268168	-0.175745	-0.189923	-0.143643	-0.0624483	-0.0398338	0.0267808	0.00185209	0.00697328	0.241615
1.783	-0.267694	-0.176946	-0.19054	-0.140585	-0.0567418	-0.0441124	0.0291477	-0.00382207	0.00469869	0.250745
1.784	-0.267738	-0.178607	-0.19111	-0.139133	-0.0497446	-0.0491753	0.0302454	-0.00936447	0.00280103	0.251482
1.785	-0.268427	-0.180622	-0.191508	-0.139574	-0.0428287	-0.0531318	0.0298778	-0.0139906	0.00140935	0.242474
1.786	-0.269633	-0.182765	-0.19154	-0.141825	-0.0372133	-0.0544684	0.0281207	-0.0169153	0.000848065	0.224316
1.787	-0.27114	-0.184801	-0.191049	-0.145491	-0.0341444	-0.052488	0.025464	-0.0172177	0.00128316	0.199126
1.788	-0.272686	-0.186634	-0.190022	-0.149962	-0.0346443	-0.0471279	0.0226466	-0.0135175	0.00260319	0.169654
1.789	-0.274046	-0.188115	-0.188451	-0.154585	-0.0391519	-0.0389236	0.0203776	-0.00408096	0.00462479	0.138419
1.79	-0.27507	-0.188953	-0.186285	-0.158796	-0.0474	-0.0289551	0.0191458	0.0117755	0.00730097	0.107549
1.791	-0.275564	-0.188965	-0.183596	-0.162046	-0.0584919	-0.0184951	0.0191038	0.0324148	0.0106669	0.0788038
1.792	-0.275449	-0.188175	-0.180667	-0.163835	-0.0711956	-0.00868428	0.0201992	0.0545242	0.0145185	0.053303
1.793	-0.274928	-0.18673	-0.177855	-0.16397	-0.0842883	-0.000417493	0.0223768	0.074763	0.0183527	0.0313942
1.794	-0.274236	-0.184885	-0.175481	-0.162492	-0.0967044	0.00558357	0.0254109	0.0906416	0.0217189	0.0129537
1.795	-0.27341	-0.182999	-0.173782	-0.159449	-0.107617	0.00885008	0.0286374	0.100487	0.0243921	-0.00203557
1.796	-0.272388	-0.181421	-0.172869	-0.155004	-0.116663	0.00935162	0.0312515	0.103483	0.0262177	-0.0132131
1.797	-0.27122	-0.180363	-0.172725	-0.149687	-0.12398	0.00727433	0.0328543	0.0999135	0.0269414	-0.0202096
1.798	-0.270079	-0.17987	-0.173216	-0.144408	-0.129929	0.00274009	0.0334397	0.0909937	0.0262276	-0.0232411
1.799	-0.269092	-0.179893	-0.174147	-0.140084	-0.134724	-0.00410806	0.0330248	0.0782568	0.0238863	-0.0232228
1.8	-0.268265	-0.180363	-0.175295	-0.13729	-0.138358	-0.0129596	0.0315563	0.0630593	0.0200755	-0.0213003
1.801	-0.267595	-0.181192	-0.176448	-0.136226	-0.140971	-0.0232369	0.0291043	0.0466296	0.0152247	-0.018573
1.802	-0.267142	-0.182231	-0.177519	-0.136819	-0.143012	-0.0340359	0.0259622	0.0302422	0.00977072	-0.0161481
1.803	-0.266966	-0.183244	-0.178516	-0.138884	-0.144864	-0.0443371	0.0224443	0.0150825	0.00406889	-0.0149442
1.804	-0.267049	-0.184029	-0.179344	-0.142159	-0.146696	-0.0533228	0.0186842	0.00198919	-0.00148922	-0.0153427
1.805	-0.26728	-0.184556	-0.17984	-0.146195	-0.148683	-0.0604939	0.0148098	-0.00866598	-0.00653408	-0.0172145
1.806	-0.26758	-0.184805	-0.180028	-0.150438	-0.150762	-0.0656297	0.011146	-0.0168223	-0.0107917	-0.0203299
1.807	-0.267992	-0.184636	-0.180173	-0.154431	-0.152246	-0.0686316	0.00808445	-0.0226541	-0.0139762	-0.0244414
1.808	-0.268601	-0.184105	-0.180517	-0.157864	-0.152249	-0.0695175	0.0058789	-0.0268017	-0.0159321	-0.0290179
1.809	-0.26934	-0.183526	-0.181059	-0.160609	-0.150514	-0.0686944	0.00456312	-0.0302866	-0.016845	-0.0334307
1.81	-0.269975	-0.183085	-0.181703	-0.162782	-0.147649	-0.0670234	0.00406935	-0.0339638	-0.0171765	-0.0373648
1.811	-0.270322	-0.18279	-0.182389	-0.164682	-0.14443	-0.0654665	0.00432865	-0.0381288	-0.0174645	-0.0408326
1.812	-0.270346	-0.182676	-0.183032	-0.166523	-0.141133	-0.0646155	0.00513773	-0.0425921	-0.0179796	-0.0439304
1.813	-0.270033	-0.182798	-0.183528	-0.168207	-0.137846	-0.0646467	0.0060962	-0.0470648	-0.0186277	-0.046654
1.814	-0.269359	-0.183121	-0.183724	-0.169513	-0.134975	-0.0656455	0.00671603	-0.0513399	-0.0192812	-0.0488853
1.815	-0.268364	-0.183524	-0.183434	-0.170448	-0.133076	-0.0676363	0.0066027	-0.0551942	-0.0199525	-0.0504837
1.816	-0.267187	-0.183926	-0.182558	-0.171312	-0.132399	-0.0704339	0.00565881	-0.0583138	-0.0206967	-0.0512601
1.817	-0.266014	-0.184323	-0.181185	-0.172459	-0.132803	-0.0737625	0.00406608	-0.0602519	-0.0214568	-0.0509373
1.818	-0.26498	-0.184728	-0.179562	-0.174033	-0.13411	-0.0774225	0.00208988	-0.0606673	-0.0219762	-0.049372
1.819	-0.26413	-0.185148	-0.177928	-0.176	-0.136236	-0.0811376	1.32e-05	-0.0595631	-0.0220831	-0.0466843
1.82	-0.26345	-0.185444	-0.176347	-0.178289	-0.138998	-0.0844198	-0.00197006	-0.0572376	-0.0219389	-0.043078
1.821	-0.262862	-0.1853	-0.174856	-0.180831	-0.142069	-0.0867888	-0.00384161	-0.0541976	-0.0217181	-0.0387655
1.822	-0.262162	-0.184458	-0.17363	-0.183458	-0.145159	-0.0879388	-0.00555224	-0.0507722	-0.0209789	-0.0340513
1.823	-0.261198	-0.18298	-0.172855	-0.185765	-0.148089	-0.0876049	-0.00693966	-0.0468951	-0.0182959	-0.0293274
1.824	-0.260159	-0.18119	-0.172591	-0.187255	-0.150759	-0.0854146	-0.00788093	-0.0426559	-0.0118429	-0.0249796
1.825	-0.259391	-0.179298	-0.172813	-0.187742	-0.153177	-0.0810866	-0.00835262	-0.0386519	-0.000740923	-0.0212078
1.826	-0.259005	-0.177294	-0.173321	-0.187375	-0.155441	-0.0748229	-0.00830234	-0.0354799	0.0138956	-0.0179106
1.827	-0.258885	-0.17518	-0.173783	-0.186323	-0.157487	-0.0672626	-0.00750052	-0.0332746	0.0293288	-0.0148912
1.828	-0.258834	-0.173013	-0.17405	-0.184686	-0.158816	-0.0590184	-0.00562736	-0.0318811	0.0429574	-0.0121441
1.829	-0.258687	-0.170742	-0.174202	-0.182587	-0.158783	-0.0504631	-0.00261933	-0.0311398	0.0538303	-0.00977069
1.83	-0.258448	-0.168377	-0.17421	-0.180175	-0.157301	-0.0419913	0.000987597	-0.0308764	0.0626428	-0.00779651
1.831	-0.258092	-0.166195	-0.17389	-0.177732	-0.154979	-0.0342232	0.00434881	-0.0308293	0.0703771	-0.00638951
1.832	-0.257458	-0.164532	-0.173217	-0.175735	-0.152405	-0.0276849	0.00711043	-0.0307315	0.0771454	-0.0060272
1.833	-0.256555	-0.163515	-0.172336	-0.174488	-0.149721	-0.0223614	0.0095403	-0.0303171	0.0823972	-0.00706015
1.834	-0.255671	-0.163061	-0.171319	-0.173792	-0.146953	-0.0177578	0.0117582	-0.0292679	0.0854903	-0.00918596
1.835	-0.255095	-0.163134	-0.170087	-0.173153	-0.144243	-0.0134432	0.01334	-0.0273253	0.0858555	-0.0115967
1.836	-0.254886	-0.163845	-0.168565	-0.172307	-0.141735	-0.00939337	0.0139648	-0.0244838	0.0831135	-0.0135392
1.837	-0.254906	-0.165136	-0.166916	-0.171469	-0.139484	-0.00579025	0.0139088	-0.0209054	0.0771795	-0.0144758
1.838	-0.255009	-0.166642	-0.165498	-0.170978	-0.137434	-0.00250661	0.0136263	-0.0165854	0.0684135	-0.013998
1.839	-0.255086	-0.167941	-0.164585	-0.170864	-0.135345	0.00121216	0.0133701	-0.011522	0.0577289	-0.0119203
1.84	-0.254998	-0.168829	-0.164247	-0.170866	-0.132971	0.00609899	0.0132808	-0.00619037	0.0462361	-0.0083451
1.841	-0.25466	-0.169357	-0.164413	-0.170772	-0.130407	0.0120257	0.0133871	-0.00130211	0.0346317	-0.0036485
1.842	-0.254141	-0.169568	-0.164934	-0.170633	-0.128095	0.0182663	0.0135459	0.00283977	0.0230943	0.00149883
1.843	-0.253666	-0.169475	-0.16567	-0.170557	-0.126409	0.0241809	0.0135599	0.0063408	0.0117817	0.00623873
1.844	-0.253501	-0.169254	-0.166502	-0.170404	-0.125312	0.0293691	0.0132508	0.00932876	0.00117587	0.00988241
1.845	-0.253748	-0.169077	-0.167226	-0.169878	-0.124574	0.0333557	0.012471	0.0120414	-0.00812401	0.0120713
1.846	-0.254286	-0.168914	-0.16768	-0.168882	-0.124174	0.0353626	0.0111167	0.0150815	-0.0157448	0.0125531
1.847	-0.254903	-0.168731	-0.16797	-0.167563	-0.124173	0.0347091	0.00921906	0.0191058	-0.021497	0.0111837
1.848	-0.255463	-0.168647	-0.168307	-0.165981	-0.12432	0.0313401	0.00705606	0.0241452	-0.0252174	0.0082157
1.849	-0.255929	-0.168901	-0.168687	-0.164037	-0.124242	0.0256003	0.00484303	0.0294494	-0.0270325	0.00422279
1.85	-0.256231	-0.16964	-0.168905	-0.161821	-0.123984	0.0177233	0.00244982	0.0340506	-0.0275347	-0.000306984
1.851	-0.256202	-0.170708	-0.168783	-0.159733	-0.123918	0.00784276	-0.000201645	0.0373003	-0.0274258	-0.00488119
1.852	-0.255753	-0.171773	-0.168327	-0.158098	-0.12428	-0.00363002	-0.00274278	0.039008	-0.027013	-0.00847227
1.853	-0.255023	-0.17259	-0.167706	-0.156862	-0.125054	-0.015822	-0.00464176	0.039322	-0.0258455	-0.00967075
1.854	-0.254281	-0.17303	-0.167033	-0.155782	-0.12622	-0.0276636	-0.00577627	0.0383725	-0.0228598	-0.00761159
1.855	-0.253787	-0.173015	-0.166246	-0.154813	-0.128018	-0.0379563	-0.00649028	0.0359485	-0.0173205	-0.00258721
1.856	-0.253701	-0.17253	-0.165301	-0.154014	-0.130793	-0.045028	-0.00700325	0.0316426	-0.00941984	0.00419523
1.857	-0.253935	-0.171662	-0.164326	-0.153224	-0.134516	-0.0472403	-0.00709269	0.0253848	0.000533776	0.0112525
1.858	-0.254227	-0.170586	-0.163528	-0.152127	-0.138647	-0.044255	-0.00663617	0.0178413	0.0127512	0.0172549
1.859	-0.254402	-0.169451	-0.163052	-0.150511	-0.142482	-0.0372158	-0.00595179	0.0102171	0.0273876	0.0212692
1.86	-0.254475	-0.168345	-0.16288	-0.148405	-0.145644	-0.0279319	-0.00529969	0.00358442	0.043934	0.0229258
1.861	-0.254531	-0.167373	-0.16284	-0.146074	-0.14809	-0.0184341	-0.00475891	-0.00151384	0.061087	0.022274
1.862	-0.254535	-0.166636	-0.162779	-0.143867	-0.149747	-0.0107569	-0.00456101	-0.00492928	0.076913	0.019408
1.863	-0.254389	-0.166101	-0.162779	-0.14201	-0.150553	-0.00634013	-0.00489835	-0.00676008	0.0894533	0.014381
1.864	-0.254106	-0.165585	-0.162998	-0.140502	-0.150597	-0.00550949	-0.00577116	-0.00730349	0.0977325	0.00749257
1.865	-0.253731	-0.164958	-0.163375	-0.139285	-0.149735	-0.00780054	-0.0073419	-0.00681214	0.102183	-0.000602488
1.866	-0.253175	-0.164268	-0.163713	-0.13857	-0.147429	-0.0125698	-0.00995419	-0.00505811	0.103835	-0.00916101
1.867	-0.252313	-0.16358	-0.163957	-0.13873	-0.14348	-0.0190524	-0.0135936	-0.00143686	0.10351	-0.0175747
1.868	-0.251286	-0.162852	-0.164146	-0.139851	-0.138543	-0.0262682	-0.0176825	0.00401545	0.102066	-0.0253444
1.869	-0.250474	-0.162098	-0.164171	-0.141493	-0.133384	-0.0330971	-0.0216623	0.0102159	0.100354	-0.0319966
1.87	-0.250058	-0.161485	-0.163883	-0.143079	-0.128239	-0.0384864	-0.0254424	0.0160151	0.0981026	-0.0370026
1.871	-0.249884	-0.16108	-0.163297	-0.144474	-0.12338	-0.0417085	-0.0289286	0.0209242	0.0937406	-0.0398289
1.872	-0.249777	-0.160683	-0.162471	-0.14583	-0.119561	-0.0424538	-0.0315867	0.0247447	0.0857694	-0.04032
1.873	-0.249652	-0.160086	-0.161469	-0.147108	-0.117299	-0.0407888	-0.0328536	0.0271483	0.0740224	-0.0388998
1.874	-0.249412	-0.159284	-0.160434	-0.1481	-0.116234	-0.0369833	-0.0325363	0.0278633	0.0598456	-0.0362099
1.875	-0.249007	-0.158384	-0.159512	-0.148595	-0.115791	-0.0313658	-0.0306607	0.0267934	0.0449844	-0.0327328
1.876	-0.248529	-0.15747	-0.158798	-0.148511	-0.116078	-0.0243783	-0.0273095	0.0237949	0.0303059	-0.0287423
1.877	-0.248118	-0.156583	-0.158349	-0.148076	-0.117523	-0.0165953	-0.0226777	0.0187219	0.01569	-0.02442
1.878	-0.247809	-0.155815	-0.158207	-0.147739	-0.119932	-0.00854015	-0.0170163	0.0116614	0.000801218	-0.0199857
1.879	-0.247525	-0.155307	-0.158445	-0.147773	-0.122592	-0.000496727	-0.0105552	0.002929	-0.0141642	-0.0157218
1.88	-0.247187	-0.155142	-0.159233	-0.148115	-0.125149	0.00726536	-0.00369287	-0.00707538	-0.0283826	-0.0119066
1.881	-0.246748	-0.155243	-0.160692	-0.148622	-0.127731	0.0142059	0.00291288	-0.0178463	-0.0408621	-0.00880064
1.882	-0.246168	-0.155454	-0.162687	-0.149254	-0.130189	0.0198801	0.00855718	-0.0285622	-0.0509496	-0.00670389
1.883	-0.24544	-0.155731	-0.164914	-0.149929	-0.131955	0.0243675	0.0127456	-0.0381317	-0.0583605	-0.00593946
1.884	-0.244556	-0.156114	-0.166951	-0.150435	-0.132825	0.0279546	0.0152366	-0.0457034	-0.062859	-0.00660234
1.885	-0.2435	-0.156562	-0.168248	-0.150558	-0.133145	0.0305625	0.015914	-0.0510549	-0.0643458	-0.00841348
1.886	-0.242287	-0.156965	-0.168381	-0.150278	-0.133198	0.0318219	0.0147786	-0.0543499	-0.0632614	-0.0110202
1.887	-0.240957	-0.157225	-0.167332	-0.149789	-0.133072	0.0316151	0.0121125	-0.055725	-0.0605516	-0.0141596
1.888	-0.239546	-0.157243	-0.165372	-0.149286	-0.13296	0.0302001	0.00844852	-0.0552769	-0.057175	-0.0175175
1.889	-0.238117	-0.156974	-0.162849	-0.148838	-0.133077	0.0278508	0.00413817	-0.0533203	-0.0538063	-0.0207199
1.89	-0.236732	-0.15647	-0.160214	-0.148392	-0.133425	0.0245867	-0.000725058	-0.0504192	-0.0509885	-0.0234184
1.891	-0.235419	-0.155755	-0.157869	-0.147933	-0.133881	0.0203736	-0.00583027	-0.0471458	-0.0493043	-0.0252816
1.892	-0.234186	-0.154804	-0.155994	-0.147659	-0.134445	0.0154781	-0.0106359	-0.0440192	-0.0491642	-0.0258667
1.893	-0.232976	-0.153739	-0.154656	-0.147641	-0.135174	0.0102732	-0.0149229	-0.0416046	-0.0507183	-0.0246462
1.894	-0.231707	-0.152881	-0.153906	-0.147573	-0.135926	0.00480226	-0.0188999	-0.040473	-0.0541662	-0.0214156
1.895	-0.230428	-0.1525	-0.153759	-0.147289	-0.136458	-0.00112177	-0.0226421	-0.0410213	-0.0597697	-0.0167293
1.896	-0.229292	-0.152676	-0.154198	-0.147117	-0.136724	-0.00751452	-0.0258686	-0.0433805	-0.067521	-0.0118002
1.897	-0.228457	-0.153414	-0.155114	-0.147411	-0.136773	-0.0141249	-0.0283914	-0.0475317	-0.0769171	-0.00785628
1.898	-0.227965	-0.154653	-0.156293	-0.148164	-0.136552	-0.0206846	-0.0303905	-0.0533267	-0.0870515	-0.00557972
1.899	-0.227828	-0.156207	-0.157473	-0.149152	-0.136172	-0.0270498	-0.0321375	-0.0604672	-0.0970446	-0.00501015
1.9	-0.228154	-0.157913	-0.158447	-0.150212	-0.136023	-0.0330631	-0.0336334	-0.0685952	-0.106352	-0.00584838
1.901	-0.22904	-0.159707	-0.159202	-0.151335	-0.136368	-0.0384343	-0.0347749	-0.0771249	-0.114625	-0.00763373
1.902	-0.230382	-0.161505	-0.159847	-0.152558	-0.137171	-0.0427126	-0.0358123	-0.0852526	-0.121482	-0.00945724
1.903	-0.231849	-0.162901	-0.16041	-0.153853	-0.138448	-0.045385	-0.0371755	-0.0924977	-0.126638	-0.0101122
1.904	-0.233177	-0.156627	-0.160833	-0.155214	-0.140423	-0.0460414	-0.03894	-0.0988176	-0.130055	-0.00882939
1.905	-0.234392	-0.12328	-0.161081	-0.156635	-0.14308	-0.0443841	-0.0408036	-0.104153	-0.131737	-0.00540547
1.906	-0.235674	-0.0484017	-0.1612	-0.15779	-0.145774	-0.0402764	-0.0424161	-0.108297	-0.131499	0.000132308
1.907	-0.237086	0.059452	-0.1613	-0.158073	-0.147793	-0.0339014	-0.0435655	-0.111163	-0.129063	0.00754442
1.908	-0.238483	0.177117	-0.161468	-0.157194	-0.149037	-0.0257839	-0.0441636	-0.11297	-0.124213	0.0163306
1.909	-0.239757	0.281966	-0.16178	-0.155408	-0.149649	-0.0166486	-0.0442202	-0.114027	-0.116947	0.0259096
1.91	-0.240916	0.358025	-0.162274	-0.153155	-0.149445	-0.0072298	-0.0437717	-0.114277	-0.107551	0.0358168
1.911	-0.241913	0.39726	-0.16279	-0.150697	-0.148153	0.00174371	-0.0428347	-0.113256	-0.0964463	0.045612
1.912	-0.242627	0.39868	-0.163056	-0.148049	-0.145904	0.00946301	-0.0414464	-0.110566	-0.0839319	0.0546056
1.913	-0.242948	0.366476	-0.162954	-0.145175	-0.142988	0.0152441	-0.0395905	-0.106101	-0.0702054	0.0618464
1.914	-0.242847	0.307979	-0.162494	-0.142159	-0.139474	0.0188318	-0.0372832	-0.0998342	-0.0555727	0.0666124
1.915	-0.242432	0.231877	-0.161647	-0.13918	-0.135599	0.0203766	-0.0348135	-0.0916591	-0.0404844	0.0689049
1.916	-0.24182	0.146889	-0.160315	-0.136367	-0.131994	0.0202351	-0.0326729	-0.0815229	-0.0254402	0.0691416
1.917	-0.241013	0.060903	-0.158471	-0.133821	-0.129074	0.0187501	-0.0312092	-0.069594	-0.0110303	0.067521
1.918	-0.240014	-0.0196482	-0.156321	-0.131755	-0.126552	0.0161423	-0.0303104	-0.0562219	0.00209025	0.0640709
1.919	-0.238902	-0.0900887	-0.154222	-0.130373	-0.123799	0.0127002	-0.0296068	-0.0418128	0.0133872	0.0591071
1.92	-0.237795	-0.147542	-0.152335	-0.129593	-0.120489	0.00891747	-0.0289764	-0.0267317	0.0225492	0.0533197
1.921	-0.236834	-0.190863	-0.150533	-0.129104	-0.116679	0.00527147	-0.0285882	-0.0113436	0.0294747	0.0474208
1.922	-0.236194	-0.22031	-0.148766	-0.128732	-0.112447	0.00190513	-0.0287188	0.003833	0.0342395	0.0418156
1.923	-0.236047	-0.237145	-0.147307	-0.128608	-0.107784	-0.00126823	-0.0295754	0.0181766	0.0370611	0.0366734
1.924	-0.236398	-0.243389	-0.146437	-0.128826	-0.102837	-0.00408471	-0.031047	0.0311512	0.0382111	0.0321706
1.925	-0.236988	-0.241486	-0.146103	-0.129145	-0.0978874	-0.0061113	-0.0328396	0.0424216	0.0379034	0.0285634
1.926	-0.237483	-0.233826	-0.146053	-0.129245	-0.0931974	-0.0072214	-0.034804	0.0518555	0.0361971	0.0261503
1.927	-0.237639	-0.222492	-0.1462	-0.129155	-0.0891847	-0.00784051	-0.0368662	0.0592746	0.0330119	0.0250441
1.928	-0.237271	-0.209275	-0.146691	-0.129196	-0.0863388	-0.00846101	-0.0387927	0.0642739	0.0283827	0.0249035
1.929	-0.236352	-0.195722	-0.147545	-0.129533	-0.0847181	-0.00921953	-0.0401745	0.0665749	0.0227185	0.0251539
1.93	-0.235094	-0.183104	-0.148464	-0.129958	-0.0838901	-0.010016	-0.0407284	0.0663693	0.0167776	0.0254461
1.931	-0.233731	-0.172353	-0.149096	-0.130129	-0.0834779	-0.0107255	-0.0406017	0.0641498	0.0113523	0.0257329
1.932	-0.232305	-0.163976	-0.149251	-0.129959	-0.0835042	-0.0113804	-0.0401484	0.0603906	0.00692436	0.0259504
1.933	-0.230824	-0.158056	-0.148903	-0.129724	-0.0841279	-0.0122816	-0.0394601	0.0553914	0.00361491	0.0257696
1.934	-0.229482	-0.154361	-0.148139	-0.129755	-0.0852833	-0.0136754	-0.038286	0.0494914	0.0014882	0.0249221
1.935	-0.228538	-0.152556	-0.147001	-0.13024	-0.0867151	-0.0154171	-0.0364414	0.043336	0.000793201	0.0236107
1.936	-0.228103	-0.15237	-0.145455	-0.131169	-0.0882096	-0.0172205	-0.0340942	0.0376525	0.00175136	0.022247
1.937	-0.22804	-0.153421	-0.143596	-0.132418	-0.0896728	-0.0191194	-0.031356	0.0328222	0.00415054	0.0208595
1.938	-0.228102	-0.155117	-0.141759	-0.134014	-0.0910249	-0.0215401	-0.0279854	0.0287127	0.0073289	0.0190853
1.939	-0.228227	-0.156953	-0.140284	-0.136019	-0.092019	-0.0248859	-0.0237439	0.0249526	0.0107667	0.0167249
1.94	-0.228521	-0.158686	-0.139293	-0.138053	-0.0922939	-0.0292391	-0.0187463	0.0213548	0.0144788	0.0138945
1.941	-0.228967	-0.160167	-0.138756	-0.13943	-0.0917518	-0.0345767	-0.0135004	0.017933	0.0185753	0.0107258
1.942	-0.229417	-0.161186	-0.138658	-0.139785	-0.0906774	-0.0408699	-0.008557	0.014632	0.0227871	0.0071975
1.943	-0.229761	-0.161606	-0.139084	-0.139302	-0.0894225	-0.0477697	-0.00416483	0.0111724	0.0265994	0.00314431
1.944	-0.229984	-0.161596	-0.140078	-0.138465	-0.0882089	-0.0546049	-0.000480099	0.00721562	0.0295892	-0.00157491
1.945	-0.23013	-0.161525	-0.141506	-0.137632	-0.0871996	-0.0608907	0.00220248	0.00273646	0.0315213	-0.00697264
1.946	-0.230216	-0.161597	-0.143207	-0.136904	-0.0866322	-0.0665488	0.00360699	-0.00201557	0.0322835	-0.0133078
1.947	-0.230174	-0.161754	-0.145089	-0.136461	-0.0868819	-0.071557	0.00368203	-0.00695275	0.0317641	-0.0212092
1.948	-0.229872	-0.161873	-0.147063	-0.136628	-0.0882026	-0.0756465	0.00265895	-0.0121031	0.0298262	-0.030979
1.949	-0.229223	-0.161895	-0.148922	-0.13751	-0.0903842	-0.0784223	0.000862116	-0.0172079	0.0265595	-0.0421001
1.95	-0.228291	-0.161837	-0.150332	-0.138874	-0.0930267	-0.0796433	-0.00152653	-0.0218585	0.0223032	-0.0534661
1.951	-0.227176	-0.161696	-0.151099	-0.140498	-0.0960448	-0.0793179	-0.00438948	-0.0259607	0.0172486	-0.0640182
1.952	-0.226009	-0.161381	-0.151316	-0.142561	-0.0994203	-0.0773788	-0.00746376	-0.0297569	0.0113825	-0.0731208
1.953	-0.22504	-0.160906	-0.151138	-0.145343	-0.102773	-0.0733657	-0.0103251	-0.0333222	0.00499113	-0.0801691
1.954	-0.224499	-0.160508	-0.150566	-0.148558	-0.105628	-0.0667973	-0.0127764	-0.0363124	-0.00115153	-0.0843492
1.955	-0.224484	-0.16032	-0.149527	-0.151533	-0.107868	-0.0577922	-0.0149922	-0.03849	-0.00631817	-0.0851411
1.956	-0.225003	-0.16017	-0.148063	-0.153963	-0.109658	-0.0471725	-0.0168312	-0.0401126	-0.0102258	-0.0828026
1.957	-0.225984	-0.15992	-0.14644	-0.156071	-0.110922	-0.0359168	-0.0176063	-0.0414835	-0.0126258	-0.0781427
1.958	-0.227252	-0.159746	-0.144995	-0.158	-0.111318	-0.0246785	-0.016841	-0.0426039	-0.012758	-0.0718576
1.959	-0.22856	-0.159927	-0.143862	-0.159407	-0.11085	-0.013949	-0.0148689	-0.0435044	-0.00964939	-0.0643909
1.96	-0.229712	-0.160449	-0.143017	-0.159925	-0.110054	-0.00433967	-0.0125967	-0.0443872	-0.00299558	-0.0562595
1.961	-0.230631	-0.160986	-0.14242	-0.159686	-0.109537	0.00346058	-0.0106145	-0.0454378	0.00662604	-0.0482083
1.962	-0.231316	-0.161276	-0.142035	-0.159128	-0.109546	0.00890087	-0.00875599	-0.0467929	0.0183996	-0.0411642
1.963	-0.231796	-0.161299	-0.141913	-0.158445	-0.110065	0.0117841	-0.00675215	-0.0484453	0.0316271	-0.0358656
1.964	-0.232101	-0.161178	-0.142166	-0.157429	-0.111148	0.012405	-0.00487306	-0.0502944	0.0456411	-0.0325191
1.965	-0.23221	-0.160947	-0.142684	-0.155899	-0.113042	0.0114436	-0.00363622	-0.0522985	0.0596851	-0.0309163
1.966	-0.232055	-0.160425	-0.143233	-0.154112	-0.115979	0.00957112	-0.00324801	-0.0541687	0.0727575	-0.0307262
1.967	-0.231596	-0.159428	-0.14374	-0.15259	-0.119762	0.00724081	-0.003543	-0.0551425	0.0838061	-0.0317086
1.968	-0.230894	-0.158058	-0.144181	-0.151563	-0.123743	0.00486493	-0.00427147	-0.0543181	0.0920625	-0.0335436
1.969	-0.230099	-0.156624	-0.144467	-0.150811	-0.127211	0.00304529	-0.00521785	-0.0510526	0.0971071	-0.0354385
1.97	-0.229344	-0.15534	-0.144508	-0.149925	-0.129555	0.00247913	-0.00617552	-0.0451685	0.0989771	-0.0362511
1.971	-0.22874	-0.154185	-0.144168	-0.14868	-0.130359	0.00339639	-0.00696279	-0.03705	0.0981251	-0.0351944
1.972	-0.228433	-0.153016	-0.143338	-0.147287	-0.129461	0.00536956	-0.00723667	-0.0275753	0.0951858	-0.0322773
1.973	-0.228486	-0.151752	-0.142063	-0.146043	-0.126756	0.00795726	-0.00648612	-0.0178284	0.091009	-0.0279671
1.974	-0.228786	-0.150462	-0.140394	-0.144707	-0.122265	0.010948	-0.00462057	-0.00866344	0.0866795	-0.02273
1.975	-0.229098	-0.149238	-0.138313	-0.142798	-0.11644	0.0138618	-0.0022506	-0.000576749	0.083143	-0.0170493
1.976	-0.229098	-0.14801	-0.135901	-0.140373	-0.110126	0.0158729	-9.72e-05	0.00601844	0.0808299	-0.0116653
1.977	-0.228505	-0.146647	-0.133483	-0.137902	-0.104159	0.0162553	0.0014979	0.0107067	0.079721	-0.0075036
1.978	-0.227185	-0.145199	-0.131592	-0.13564	-0.0990042	0.0147741	0.0023987	0.0133452	0.079596	-0.005184
1.979	-0.225167	-0.143977	-0.130521	-0.133522	-0.0948	0.0118189	0.00239869	0.0142244	0.0801522	-0.00467564
1.98	-0.222662	-0.143292	-0.130037	-0.131429	-0.0917114	0.00800812	0.00125098	0.0138891	0.0810392	-0.005571
1.981	-0.219876	-0.143092	-0.129739	-0.129363	-0.0901978	0.00378968	-0.00109418	0.0128784	0.0817838	-0.00762417
1.982	-0.216914	-0.14302	-0.129456	-0.127522	-0.090751	-0.000305128	-0.00427392	0.0116081	0.0818628	-0.0106336
1.983	-0.213996	-0.142788	-0.129186	-0.126165	-0.0932564	-0.00349808	-0.00760251	0.0105339	0.0810637	-0.0138871
1.984	-0.211512	-0.142457	-0.128874	-0.125254	-0.0969662	-0.0051679	-0.0105735	0.0101773	0.0796798	-0.0163733
1.985	-0.209798	-0.142218	-0.128417	-0.124417	-0.101068	-0.00518014	-0.0130372	0.0107237	0.0782587	-0.0174963
1.986	-0.208895	-0.142049	-0.127881	-0.123398	-0.105015	-0.00372334	-0.0147625	0.0118123	0.0771518	-0.017263
1.987	-0.208657	-0.141814	-0.127396	-0.122284	-0.108442	-0.000837931	-0.0154056	0.0128465	0.0764741	-0.0158838
1.988	-0.208941	-0.141441	-0.12692	-0.121129	-0.11103	0.0037157	-0.0150289	0.0134588	0.0763443	-0.0132029
1.989	-0.209592	-0.140885	-0.12633	-0.119729	-0.112579	0.0100447	-0.0141921	0.0135261	0.0768175	-0.00866234
1.99	-0.210418	-0.140189	-0.125586	-0.11786	-0.113162	0.0177907	-0.0134257	0.0127962	0.0778159	-0.00203335
1.991	-0.211134	-0.139512	-0.124771	-0.115479	-0.113052	0.0261779	-0.0127694	0.0108975	0.0791785	0.00617497
1.992	-0.211409	-0.138983	-0.124087	-0.112711	-0.112322	0.0343431	-0.0119048	0.00774525	0.0807388	0.0152332
1.993	-0.211069	-0.138672	-0.123685	-0.109579	-0.110893	0.0417746	-0.0106886	0.00368408	0.082589	0.0246279
1.994	-0.210177	-0.138596	-0.123595	-0.105899	-0.109033	0.0483556	-0.00934533	-0.00074564	0.0849845	0.033808
1.995	-0.208942	-0.138733	-0.123794	-0.101667	-0.107276	0.0539639	-0.00804638	-0.00498218	0.08788	0.0419753
1.996	-0.207632	-0.139136	-0.124195	-0.0973182	-0.105945	0.0582992	-0.00651945	-0.00844769	0.0909622	0.0483603
1.997	-0.206488	-0.139864	-0.124647	-0.0935228	-0.105079	0.0610108	-0.00437933	-0.0107365	0.0940082	0.0525167
1.998	-0.205621	-0.140788	-0.125014	-0.0908128	-0.104679	0.0617394	-0.00169732	-0.0118416	0.0969333	0.0541711
[truncated: 1,001 more rows]

## Sheet: G232D_K_S2_N2
First_Column	100	30	10	3	1	0.3	0.1	0.03	0.01	0.003
0	-0.000232593	-0.000129212	-8.49e-05	-1.11e-05	-0.000177211	9.6e-05	-0.000225209	-0.000143981	-0.000679347	0.000177239
0.001	-0.00145673	-0.000782997	-0.000485816	-0.000114819	-0.00112217	0.000504909	-0.00144289	-0.000917748	-0.00428961	0.0010522
0.002	-0.00451596	-0.00234795	-0.00144729	-0.000435757	-0.00358856	0.00128309	-0.00450843	-0.00289413	-0.0134477	0.00304968
0.003	-0.00968483	-0.00491865	-0.00316774	-0.000948001	-0.00800679	0.00233369	-0.00953095	-0.00628442	-0.0290697	0.0059987
0.004	-0.0167347	-0.00845731	-0.00579144	-0.00143028	-0.0142588	0.00374345	-0.0158486	-0.0110242	-0.0501841	0.00926829
0.005	-0.0251971	-0.0128605	-0.00928642	-0.00167648	-0.0216976	0.00547743	-0.0225371	-0.0170014	-0.0744903	0.0121932
0.006	-0.0345211	-0.0178289	-0.0134003	-0.0017803	-0.0294694	0.00687194	-0.0287703	-0.0238143	-0.098552	0.014354
0.007	-0.0442252	-0.0229562	-0.0176907	-0.00218494	-0.0368799	0.00700018	-0.0338964	-0.0306461	-0.11855	0.0154324
0.008	-0.0538065	-0.0279156	-0.0216993	-0.00330524	-0.0434219	0.00533371	-0.0374253	-0.0367536	-0.13161	0.014856
0.009	-0.0626516	-0.0324926	-0.0252345	-0.0051767	-0.0487096	0.00180911	-0.0391669	-0.0418302	-0.136473	0.0119103
0.01	-0.070247	-0.0365664	-0.0283273	-0.00752956	-0.052577	-0.00346346	-0.0393501	-0.045642	-0.133394	0.00680223
0.011	-0.0763487	-0.0400904	-0.0309491	-0.0100565	-0.0549303	-0.0102521	-0.0384388	-0.0477477	-0.123911	0.00136998
0.012	-0.0809533	-0.0429844	-0.0329655	-0.0125047	-0.0554815	-0.0180127	-0.0367711	-0.0480197	-0.110174	-0.00225669
0.013	-0.0842314	-0.045131	-0.0342512	-0.0146602	-0.0541525	-0.0259157	-0.0344829	-0.0470522	-0.0941142	-0.00340662
0.014	-0.0864138	-0.0465963	-0.0347787	-0.0163616	-0.051747	-0.0331661	-0.0316946	-0.0457197	-0.0772731	-0.0026945
0.015	-0.0877017	-0.0476544	-0.0346639	-0.0175043	-0.0496618	-0.0393124	-0.0286504	-0.0444535	-0.0610412	-0.00084411
0.016	-0.0883187	-0.0484665	-0.0341132	-0.0181663	-0.0487004	-0.0442202	-0.0258213	-0.043123	-0.0465928	0.00166279
0.017	-0.0885523	-0.0489262	-0.0333596	-0.0186712	-0.0486775	-0.0477496	-0.0238309	-0.0416355	-0.0345033	0.00432726
0.018	-0.0885981	-0.0488806	-0.0325533	-0.0193373	-0.0492395	-0.0496825	-0.0230767	-0.0403038	-0.0246867	0.00654604
0.019	-0.0884439	-0.0483545	-0.0317005	-0.0201232	-0.0503239	-0.0498962	-0.0235696	-0.0394113	-0.0169115	0.00768187
0.02	-0.088055	-0.0474898	-0.0307862	-0.0206218	-0.0518391	-0.0483563	-0.025191	-0.0386677	-0.0110886	0.00731965
0.021	-0.0875123	-0.0464388	-0.0297838	-0.0206325	-0.0533919	-0.0450953	-0.0277438	-0.0374913	-0.00695419	0.00545252
0.022	-0.0868629	-0.0454093	-0.0286517	-0.0204944	-0.0543961	-0.040246	-0.0308273	-0.0356692	-0.00388512	0.00214207
0.023	-0.0861316	-0.044607	-0.0274407	-0.0206032	-0.0543653	-0.0340577	-0.033934	-0.0334832	-0.00122274	-0.00275438
0.024	-0.0855479	-0.0441107	-0.0262207	-0.0211078	-0.0530405	-0.0270428	-0.0364936	-0.0313972	0.00134329	-0.0092439
0.025	-0.0854567	-0.0438662	-0.0250247	-0.0221516	-0.0503082	-0.0200393	-0.037892	-0.0296374	0.00393157	-0.017013
0.026	-0.0860101	-0.0437314	-0.0239504	-0.0238801	-0.0462282	-0.0139865	-0.0377716	-0.0280221	0.00683021	-0.0256162
0.027	-0.0870604	-0.0435821	-0.023158	-0.0262754	-0.0411712	-0.00958075	-0.0363046	-0.0260959	0.0102237	-0.0344934
0.028	-0.0882713	-0.0433207	-0.022676	-0.0291566	-0.0357165	-0.00708764	-0.0340051	-0.0233264	0.0138656	-0.0430153
0.029	-0.0893146	-0.0428501	-0.0223155	-0.0321956	-0.0303337	-0.00638562	-0.0313267	-0.0194717	0.0172778	-0.050749
0.03	-0.0900325	-0.0421725	-0.0219348	-0.035063	-0.0252108	-0.00711843	-0.0285428	-0.0149046	0.0198956	-0.0574613
0.031	-0.090442	-0.0413325	-0.0215806	-0.0375702	-0.0203616	-0.00897102	-0.0258704	-0.0104387	0.021129	-0.0626815
0.032	-0.0905844	-0.0403659	-0.0213011	-0.0394702	-0.0158432	-0.0118108	-0.0234827	-0.00670782	0.0206781	-0.065966
0.033	-0.0904884	-0.0393642	-0.0210702	-0.0404519	-0.0118715	-0.0154532	-0.0214779	-0.0037854	0.0188239	-0.0677142
0.034	-0.090248	-0.0384227	-0.0208765	-0.0405317	-0.00876472	-0.0195225	-0.0200694	-0.00135552	0.0162545	-0.0685227
0.035	-0.0899198	-0.037628	-0.0207505	-0.0401227	-0.006843	-0.0236705	-0.0196255	0.000981521	0.0134771	-0.0680566
0.036	-0.0894979	-0.0370542	-0.0207279	-0.0396674	-0.00631301	-0.0276939	-0.0203371	0.00328225	0.0105663	-0.0656222
0.037	-0.0891197	-0.0366874	-0.0207663	-0.0393001	-0.00711677	-0.0313932	-0.0219562	0.00516279	0.0075657	-0.061331
0.038	-0.0890017	-0.0364786	-0.0207049	-0.03886	-0.00887732	-0.0345536	-0.0239142	0.00628421	0.00482042	-0.0560427
0.039	-0.0891453	-0.0364888	-0.0203953	-0.0382778	-0.0110175	-0.0369865	-0.0257212	0.00648344	0.00283489	-0.0503646
0.04	-0.0893577	-0.0369088	-0.0197884	-0.0376638	-0.013004	-0.0384596	-0.0272357	0.00563465	0.00188762	-0.0445048
0.041	-0.0894925	-0.0379157	-0.0188233	-0.0370618	-0.0143984	-0.0388117	-0.0286484	0.00382812	0.0018205	-0.0392626
0.042	-0.0895273	-0.0394862	-0.0173907	-0.0365594	-0.0148266	-0.0383397	-0.0302083	0.00143057	0.00227724	-0.0358841
0.043	-0.0894848	-0.0413703	-0.0155472	-0.0363748	-0.0142468	-0.0378777	-0.0318403	-0.00123131	0.00302032	-0.03452
0.044	-0.089359	-0.0433007	-0.0136129	-0.0365819	-0.0130667	-0.0381336	-0.0332428	-0.00412636	0.00417396	-0.033659
0.045	-0.0891167	-0.0451399	-0.0119113	-0.0370738	-0.0118736	-0.0392039	-0.0342278	-0.00730926	0.00636831	-0.0314339
0.046	-0.0887614	-0.0467472	-0.0106337	-0.0377807	-0.0111092	-0.0408653	-0.0346549	-0.0106264	0.0102312	-0.0271975
0.047	-0.0884292	-0.0479311	-0.00995029	-0.0386571	-0.0108872	-0.0428364	-0.034356	-0.0137533	0.0154793	-0.0215099
0.048	-0.0883042	-0.048586	-0.00997969	-0.0395506	-0.0110892	-0.0448542	-0.0333428	-0.0162305	0.0209005	-0.015067
0.049	-0.0883413	-0.0486787	-0.0106883	-0.0401505	-0.0115499	-0.0467699	-0.0318703	-0.0175778	0.0256047	-0.00824286
0.05	-0.0882979	-0.0482098	-0.0119834	-0.0400917	-0.0121543	-0.0484663	-0.030237	-0.0175906	0.0298037	-0.00150873
0.051	-0.0879793	-0.0472846	-0.0138728	-0.0391964	-0.0129222	-0.0498383	-0.0285133	-0.0163952	0.0338984	0.00421622
0.052	-0.0872638	-0.046079	-0.0163696	-0.0375368	-0.0140163	-0.0509042	-0.0265453	-0.0142934	0.0374713	0.00801059
0.053	-0.0861491	-0.0447375	-0.0192894	-0.0353405	-0.0155719	-0.0517794	-0.0242336	-0.0115134	0.0395565	0.00946408
0.054	-0.0848024	-0.0433977	-0.0223871	-0.0328929	-0.0175334	-0.0525746	-0.0215108	-0.0080853	0.0395228	0.00857743
0.055	-0.0834157	-0.0421746	-0.0255142	-0.0303809	-0.019708	-0.0533376	-0.0182676	-0.00403295	0.0374168	0.00553937
0.056	-0.0821287	-0.0410976	-0.0284153	-0.0278304	-0.0218883	-0.0540065	-0.0145395	0.000482274	0.0334806	0.000762741
0.057	-0.0810359	-0.0402505	-0.0307037	-0.0252718	-0.0238092	-0.0542208	-0.0104713	0.00505237	0.0278266	-0.00503631
0.058	-0.0802236	-0.0397922	-0.0320777	-0.0228886	-0.0250911	-0.0530769	-0.00618054	0.00902569	0.0207407	-0.0111749
0.059	-0.0798517	-0.0397357	-0.03242	-0.0209541	-0.0254261	-0.0493473	-0.00173746	0.0118592	0.0128281	-0.0175337
0.06	-0.0800209	-0.0399465	-0.0318474	-0.019694	-0.0247443	-0.0421937	0.00268232	0.0132338	0.00498649	-0.0244626
0.061	-0.0805678	-0.0403492	-0.0306474	-0.0192222	-0.0231983	-0.0317605	0.0065537	0.0131592	-0.00170598	-0.0321358
0.062	-0.0812124	-0.0409569	-0.0291184	-0.0195518	-0.0210919	-0.0191223	0.00926392	0.0124062	-0.0067234	-0.0404524
0.063	-0.081848	-0.0417054	-0.0275285	-0.020567	-0.0187441	-0.00574034	0.0105363	0.0120737	-0.0103237	-0.0495741
0.064	-0.0825407	-0.0424356	-0.0261394	-0.0219645	-0.0165006	0.00689113	0.0103511	0.0126048	-0.0129473	-0.0596952
0.065	-0.0833243	-0.0430225	-0.0250955	-0.0233513	-0.0147343	0.017368	0.00879879	0.0137155	-0.015025	-0.0696081
0.066	-0.0840901	-0.0434053	-0.0243477	-0.0243362	-0.0136721	0.0246621	0.00618476	0.0148257	-0.0167929	-0.0764193
0.067	-0.0846432	-0.0435999	-0.0238549	-0.0245838	-0.0134567	0.0283239	0.00304505	0.015339	-0.018071	-0.0779524
0.068	-0.0847851	-0.043702	-0.023731	-0.024105	-0.014199	0.0283859	-0.000110247	0.0149253	-0.018593	-0.0746556
0.069	-0.0843771	-0.0438021	-0.0240525	-0.0232918	-0.0158264	0.0251979	-0.00301938	0.0136692	-0.018274	-0.0684659
0.07	-0.083529	-0.0439059	-0.0246375	-0.0224424	-0.0181394	0.0192328	-0.00562327	0.0118247	-0.0170675	-0.0607998
0.071	-0.0826143	-0.0439394	-0.0251149	-0.0215185	-0.020934	0.0109482	-0.00795987	0.00943133	-0.0149158	-0.0523446
0.072	-0.0819248	-0.0438205	-0.0251616	-0.0203983	-0.0239682	0.000826859	-0.0100644	0.00621117	-0.011906	-0.0441339
0.073	-0.0815348	-0.0435065	-0.0246072	-0.0191988	-0.0269995	-0.010566	-0.0119346	0.00157855	-0.00821854	-0.0376136
0.074	-0.0814156	-0.0429935	-0.0234769	-0.0182419	-0.0299507	-0.0225861	-0.0136458	-0.00532956	-0.00403749	-0.0336719
0.075	-0.0814815	-0.0423441	-0.0220544	-0.0178033	-0.0329079	-0.0345425	-0.0153899	-0.0150519	0.000202154	-0.0322743
0.076	-0.0816601	-0.0416988	-0.0207215	-0.018036	-0.0359287	-0.0457653	-0.0173939	-0.0271596	0.00370124	-0.0329699
0.077	-0.0819417	-0.0412021	-0.0197705	-0.018985	-0.0389097	-0.0556854	-0.0198521	-0.0407595	0.0056471	-0.0354496
0.078	-0.0822971	-0.0409521	-0.0194456	-0.0205997	-0.0416289	-0.0638384	-0.0227941	-0.0553472	0.00556852	-0.0395203
0.079	-0.0826334	-0.0409991	-0.0199992	-0.0228147	-0.0439476	-0.0699007	-0.0259803	-0.0707404	0.00347842	-0.0448702
0.08	-0.0828738	-0.0412995	-0.0216523	-0.0255	-0.0459473	-0.0738674	-0.0291506	-0.0865098	-0.000237667	-0.0511883
0.081	-0.0830365	-0.0416337	-0.0245093	-0.0283276	-0.0478492	-0.0760852	-0.0323315	-0.101722	-0.00532771	-0.0582241
0.082	-0.0832228	-0.0417656	-0.0284638	-0.0309277	-0.0498358	-0.0770076	-0.0356687	-0.115298	-0.0119193	-0.0654996
0.083	-0.0834717	-0.0417487	-0.0331901	-0.0331255	-0.0519727	-0.0770292	-0.0391414	-0.126511	-0.0201128	-0.0722714
0.084	-0.0837049	-0.0418537	-0.0382643	-0.0349235	-0.0541769	-0.0765254	-0.0427023	-0.135207	-0.0296664	-0.0779035
0.085	-0.0838035	-0.0422425	-0.0433073	-0.0364204	-0.0562223	-0.0758778	-0.0464129	-0.141777	-0.0402276	-0.0820398
0.086	-0.0836389	-0.0428948	-0.0480527	-0.0377592	-0.0578666	-0.0754311	-0.0501738	-0.146728	-0.0517635	-0.0844122
0.087	-0.0831931	-0.0438012	-0.052289	-0.0390582	-0.0588749	-0.0755034	-0.0535869	-0.150338	-0.0644448	-0.0847099
0.088	-0.0825269	-0.0450488	-0.0557926	-0.0404035	-0.059133	-0.0763362	-0.0562349	-0.152816	-0.0780874	-0.0828298
0.089	-0.0815737	-0.0466719	-0.0584402	-0.0419806	-0.0589778	-0.0778439	-0.0579225	-0.154353	-0.09207	-0.0792388
0.09	-0.0803257	-0.0485414	-0.0602715	-0.0441307	-0.0590432	-0.0796225	-0.0586658	-0.155118	-0.105673	-0.0749018
0.091	-0.0790838	-0.0504826	-0.061335	-0.0470374	-0.0596757	-0.0813274	-0.0586423	-0.15525	-0.118387	-0.0708064
0.092	-0.0782907	-0.0524881	-0.0616132	-0.0505958	-0.0607951	-0.0828124	-0.0581503	-0.154574	-0.130061	-0.067773
0.093	-0.0782507	-0.054665	-0.0611114	-0.0547939	-0.0621821	-0.083991	-0.0575668	-0.152673	-0.140587	-0.0664572
0.094	-0.0789476	-0.0569153	-0.0599159	-0.0597222	-0.0636593	-0.0847463	-0.057244	-0.149341	-0.149552	-0.0665636
0.095	-0.0801058	-0.0589183	-0.0582641	-0.0651685	-0.0651005	-0.0849375	-0.0574265	-0.144793	-0.156656	-0.066253
0.096	-0.0813974	-0.0604495	-0.0565481	-0.0706019	-0.0664546	-0.084517	-0.0583677	-0.139559	-0.16207	-0.063543
0.097	-0.082504	-0.0614323	-0.0550916	-0.0755051	-0.0677039	-0.0836882	-0.060263	-0.134034	-0.166138	-0.0581308
0.098	-0.0831742	-0.0618032	-0.0539401	-0.0795939	-0.0686768	-0.0827925	-0.0630329	-0.128301	-0.169113	-0.0511497
0.099	-0.0833139	-0.0615508	-0.0529001	-0.0827393	-0.0691045	-0.08196	-0.0663899	-0.122531	-0.171153	-0.0439492
0.1	-0.0829893	-0.0607217	-0.0517819	-0.0847942	-0.0689077	-0.0811119	-0.0700871	-0.117007	-0.172474	-0.0377243
0.101	-0.0823611	-0.0594084	-0.0505358	-0.0855911	-0.0681918	-0.0802208	-0.0741531	-0.11185	-0.17341	-0.0332086
0.102	-0.0815775	-0.0577186	-0.0490818	-0.0850076	-0.0670812	-0.0793796	-0.078725	-0.106998	-0.174208	-0.029932
0.103	-0.0807273	-0.0557223	-0.0472396	-0.0829787	-0.0656952	-0.0787172	-0.0835834	-0.102258	-0.174973	-0.0264937
0.104	-0.0798455	-0.0535369	-0.0449013	-0.0795567	-0.0640999	-0.0782416	-0.0881871	-0.0974294	-0.17582	-0.0221833
0.105	-0.0789755	-0.0513968	-0.0420937	-0.0749994	-0.0622407	-0.077858	-0.0920465	-0.0925956	-0.176903	-0.0179666
0.106	-0.0782884	-0.0496403	-0.0389114	-0.0697547	-0.060086	-0.0775605	-0.0947679	-0.0882316	-0.17828	-0.0154136
0.107	-0.0779437	-0.0484732	-0.0354107	-0.0643302	-0.0577864	-0.0774446	-0.0959405	-0.0848717	-0.179732	-0.0149175
0.108	-0.0778666	-0.0477276	-0.0315466	-0.0591315	-0.0554984	-0.0776279	-0.0952873	-0.082665	-0.180802	-0.0156652
0.109	-0.0778573	-0.0470454	-0.0272672	-0.0543795	-0.0531833	-0.0781322	-0.092863	-0.0813727	-0.181086	-0.0171052
0.11	-0.0777784	-0.0461735	-0.0226376	-0.0501973	-0.0507782	-0.0787626	-0.0889992	-0.0806117	-0.180318	-0.0194415
0.111	-0.077642	-0.0450708	-0.0179281	-0.0467149	-0.048336	-0.0791919	-0.0842445	-0.0800985	-0.178226	-0.022807
0.112	-0.0776056	-0.0438166	-0.0136425	-0.0439992	-0.0459463	-0.0790823	-0.0793278	-0.0799486	-0.174599	-0.0268305
0.113	-0.0777736	-0.0423916	-0.0103348	-0.0418973	-0.0436979	-0.0781592	-0.0748652	-0.0804662	-0.16952	-0.031162
0.114	-0.0780373	-0.040683	-0.00847348	-0.0400763	-0.0415713	-0.0761529	-0.0711233	-0.0816483	-0.163424	-0.03592
0.115	-0.0782533	-0.038727	-0.00847357	-0.0382674	-0.0393677	-0.0727803	-0.0681192	-0.0831694	-0.156796	-0.0415499
0.116	-0.0783911	-0.0367214	-0.0105154	-0.0363642	-0.0368321	-0.0680199	-0.065784	-0.0846537	-0.149963	-0.0484617
0.117	-0.0783974	-0.0347911	-0.0143097	-0.0343298	-0.0338033	-0.0621431	-0.0640785	-0.0859861	-0.143363	-0.0563816
0.118	-0.0782246	-0.0329268	-0.0192565	-0.0321876	-0.0303173	-0.0554999	-0.0630914	-0.0872466	-0.13764	-0.0638881
0.119	-0.0779788	-0.0311612	-0.0247257	-0.0300545	-0.0265248	-0.0486113	-0.063025	-0.0884135	-0.133286	-0.0691282
0.12	-0.0778356	-0.0296281	-0.0300706	-0.0280228	-0.0225614	-0.0422721	-0.0640562	-0.0896422	-0.130376	-0.0711079
0.121	-0.0779514	-0.0284141	-0.0346479	-0.0260272	-0.0187321	-0.0371962	-0.066292	-0.0913474	-0.128787	-0.0702089
0.122	-0.0784608	-0.0275132	-0.0379649	-0.0239673	-0.0155877	-0.0336258	-0.0697892	-0.0935317	-0.128548	-0.0675674
0.123	-0.0793924	-0.0269086	-0.0397306	-0.0219162	-0.0135493	-0.0313849	-0.0744451	-0.0956123	-0.129734	-0.0638809
0.124	-0.0806758	-0.0265984	-0.0399325	-0.0201402	-0.0126728	-0.0301458	-0.0799594	-0.097101	-0.132158	-0.0590936
0.125	-0.0822626	-0.0264717	-0.0389289	-0.0189844	-0.0128332	-0.0296202	-0.085936	-0.0980378	-0.135206	-0.0533057
0.126	-0.0840716	-0.0262778	-0.0372659	-0.0186458	-0.0139387	-0.0295708	-0.0919561	-0.0986409	-0.137957	-0.0472422
0.127	-0.0858696	-0.0258305	-0.0354059	-0.0190013	-0.0159312	-0.0297566	-0.0976106	-0.0989576	-0.139668	-0.0415662
0.128	-0.0873852	-0.025053	-0.0337015	-0.0197028	-0.018773	-0.0296922	-0.102571	-0.0990849	-0.139993	-0.036108
0.129	-0.0884547	-0.0239152	-0.0323626	-0.0204393	-0.0225516	-0.0282203	-0.106677	-0.099278	-0.138836	-0.0300883
0.13	-0.0890523	-0.0224209	-0.031383	-0.0211529	-0.0273322	-0.0236605	-0.109908	-0.0996778	-0.136303	-0.0230453
0.131	-0.089225	-0.0205144	-0.030752	-0.0220207	-0.0328078	-0.0145589	-0.112245	-0.100123	-0.132608	-0.0151787
0.132	-0.0889441	-0.0181365	-0.0306716	-0.0232918	-0.0384207	-0.000289283	-0.113548	-0.100311	-0.12799	-0.0067957
0.133	-0.0881068	-0.0153929	-0.0314908	-0.0251072	-0.0438215	0.0187788	-0.113574	-0.100245	-0.122713	0.00215241
0.134	-0.0867345	-0.0125415	-0.0335172	-0.0274301	-0.0489493	0.0412047	-0.112053	-0.100291	-0.116968	0.0117514
0.135	-0.0850789	-0.00985161	-0.0368856	-0.0301225	-0.0537744	0.0644225	-0.10873	-0.100675	-0.110956	0.021622
0.136	-0.0834505	-0.00750731	-0.0414383	-0.0329727	-0.0581474	0.0853251	-0.1036	-0.101349	-0.105029	0.0311052
0.137	-0.0819819	-0.00559209	-0.0466047	-0.0357403	-0.0618816	0.101164	-0.0970248	-0.102358	-0.0994874	0.0397341
0.138	-0.0806196	-0.00421817	-0.0516498	-0.0382515	-0.0648958	0.110031	-0.0895128	-0.103808	-0.0943626	0.0474451
0.139	-0.0793155	-0.00377337	-0.0560522	-0.0404457	-0.0671408	0.11115	-0.0816174	-0.105468	-0.0895909	0.0543598
0.14	-0.0780775	-0.00474049	-0.0594859	-0.0424044	-0.06852	0.10494	-0.0738454	-0.10676	-0.0852638	0.0596368
0.141	-0.0766859	-0.00721536	-0.0617067	-0.0442863	-0.0689784	0.0926091	-0.0665895	-0.107289	-0.0814855	0.0611177
0.142	-0.0747075	-0.0109367	-0.0625414	-0.0462315	-0.0685039	0.0756881	-0.0601869	-0.107245	-0.0781955	0.0575225
0.143	-0.0720479	-0.0155849	-0.0619178	-0.0483603	-0.0671349	0.0557986	-0.0548355	-0.107078	-0.0753908	0.0502628
0.144	-0.0691352	-0.020809	-0.0599714	-0.0507993	-0.064981	0.0346387	-0.05066	-0.107096	-0.0732982	0.0421147
0.145	-0.0666202	-0.0261497	-0.0571013	-0.053658	-0.062142	0.0138701	-0.0479308	-0.107513	-0.0721459	0.0347162
0.146	-0.0651306	-0.0311418	-0.0538401	-0.0568862	-0.0587	-0.00527188	-0.0469077	-0.108526	-0.0718595	0.0279421
0.147	-0.0650705	-0.0355354	-0.0506178	-0.0602369	-0.0547562	-0.0220975	-0.0475815	-0.110215	-0.0720529	0.0211417
0.148	-0.0665223	-0.0392651	-0.0477403	-0.0634584	-0.0504424	-0.0361951	-0.0498176	-0.112454	-0.0723039	0.0141743
0.149	-0.0692669	-0.0422436	-0.0454902	-0.0663559	-0.0459713	-0.0473753	-0.0535808	-0.115092	-0.0723852	0.00738891
0.15	-0.0728057	-0.0443866	-0.0440444	-0.0687026	-0.0416178	-0.055701	-0.0588475	-0.118097	-0.0721527	0.00107831
0.151	-0.0765181	-0.0456826	-0.0433817	-0.0703089	-0.0376759	-0.0613125	-0.06545	-0.121389	-0.0714555	-0.00478528
0.152	-0.0799387	-0.0461173	-0.0433303	-0.07124	-0.0343899	-0.0643578	-0.0730252	-0.12482	-0.0702552	-0.0101594
0.153	-0.0828018	-0.0456857	-0.0436994	-0.0717698	-0.0318108	-0.0651612	-0.0810139	-0.128207	-0.0686528	-0.014745
0.154	-0.0849198	-0.0445194	-0.0443625	-0.0720268	-0.0298678	-0.0642824	-0.0888298	-0.131405	-0.0670964	-0.01849
0.155	-0.0862771	-0.0428809	-0.0452086	-0.0719071	-0.0285266	-0.0622331	-0.0961135	-0.134469	-0.0665887	-0.0216037
0.156	-0.08704	-0.040993	-0.0461639	-0.0712538	-0.0278112	-0.0593098	-0.102728	-0.137417	-0.068335	-0.0238557
0.157	-0.087352	-0.0389815	-0.0473072	-0.0699968	-0.027737	-0.0557784	-0.108534	-0.139987	-0.0730866	-0.0246227
0.158	-0.0872987	-0.0369324	-0.0487763	-0.0683201	-0.0281055	-0.0520403	-0.113306	-0.141913	-0.080687	-0.023652
0.159	-0.0869245	-0.0349551	-0.0506442	-0.0665867	-0.0284806	-0.0486782	-0.116746	-0.143158	-0.0902641	-0.0211912
0.16	-0.0862346	-0.0332805	-0.0530002	-0.0649528	-0.0283773	-0.0462547	-0.118647	-0.143723	-0.100924	-0.0174715
0.161	-0.0852832	-0.0321883	-0.055886	-0.0633377	-0.0273899	-0.0450284	-0.119089	-0.143248	-0.112205	-0.0123954
0.162	-0.0841969	-0.0318111	-0.0591152	-0.0616853	-0.0254043	-0.0450889	-0.118238	-0.140865	-0.123947	-0.00580174
0.163	-0.0832008	-0.0320579	-0.06239	-0.0599869	-0.022662	-0.0465452	-0.116239	-0.135983	-0.135961	0.00201196
0.164	-0.0803177	-0.032676	-0.0654292	-0.0581877	-0.0196087	-0.0493368	-0.113316	-0.129201	-0.147936	0.0102538
0.165	-0.0683144	-0.0334334	-0.0679042	-0.0561732	-0.0168082	-0.0530539	-0.109609	-0.12163	-0.159506	0.0181464
0.166	-0.0398918	-0.0342552	-0.069585	-0.0538808	-0.0148239	-0.0571162	-0.105231	-0.113818	-0.170336	0.0252439
0.167	0.00360252	-0.0352326	-0.0704947	-0.0513274	-0.0141023	-0.0610815	-0.100536	-0.106006	-0.180244	0.0311849
0.168	0.0530615	-0.0365735	-0.0707103	-0.0485237	-0.0148158	-0.0647243	-0.0960019	-0.098882	-0.189069	0.0354078
0.169	0.09841	-0.0383897	-0.0702281	-0.0455708	-0.0167282	-0.0678799	-0.0919649	-0.0936568	-0.196447	0.0374335
0.17	0.132442	-0.0405459	-0.0691257	-0.0427474	-0.0194155	-0.0702946	-0.0885945	-0.0912939	-0.202	0.0371899
0.171	0.151311	-0.0428743	-0.0676199	-0.0403053	-0.0225333	-0.0716813	-0.0860391	-0.0917792	-0.20554	0.0349243
0.172	0.153875	-0.0453117	-0.0658674	-0.0382656	-0.0259121	-0.0719053	-0.0844821	-0.0944775	-0.206926	0.031134
0.173	0.141121	-0.0478089	-0.0638039	-0.0364774	-0.0295881	-0.0711202	-0.0839965	-0.0989816	-0.205949	0.0264915
0.174	0.115645	-0.0503177	-0.0612746	-0.0348275	-0.033592	-0.0697133	-0.0845286	-0.105174	-0.20247	0.0215549
0.175	0.0808581	-0.0527346	-0.0582926	-0.0334412	-0.0377624	-0.0680811	-0.0859815	-0.112616	-0.196895	0.0166313
0.176	0.040336	-0.0548573	-0.0550911	-0.0326109	-0.0419017	-0.0665247	-0.0881236	-0.120437	-0.190349	0.0119484
0.177	-0.00240644	-0.0564579	-0.0519164	-0.0325435	-0.0459496	-0.0652009	-0.0905342	-0.127853	-0.183923	0.00774432
0.178	-0.0440649	-0.0573118	-0.0488698	-0.0333105	-0.0499549	-0.0640667	-0.0927607	-0.134462	-0.177951	0.00418959
0.179	-0.081932	-0.0572216	-0.0459628	-0.0348789	-0.0539524	-0.0630448	-0.0944764	-0.140095	-0.172297	0.00133296
0.18	-0.11416	-0.0561415	-0.0431318	-0.0370424	-0.0578323	-0.062143	-0.0955475	-0.144535	-0.167101	-0.00084227
0.181	-0.139649	-0.0542977	-0.0403207	-0.0393613	-0.0613473	-0.0613962	-0.0959872	-0.147467	-0.162963	-0.00231624
0.182	-0.157988	-0.0520562	-0.0376547	-0.0412208	-0.0642635	-0.0608674	-0.0957888	-0.148946	-0.160408	-0.00310551
0.183	-0.169425	-0.0497394	-0.0353607	-0.0421683	-0.0665213	-0.0606134	-0.094862	-0.149485	-0.159498	-0.00349965
0.184	-0.174663	-0.04759	-0.0337211	-0.0422045	-0.0682915	-0.0606261	-0.0931936	-0.149421	-0.160026	-0.00410669
0.185	-0.17472	-0.0456278	-0.0331501	-0.041614	-0.0697154	-0.0608169	-0.0909779	-0.148794	-0.161684	-0.00538829
0.186	-0.170796	-0.0436659	-0.0339844	-0.0406946	-0.070749	-0.0609625	-0.0884141	-0.147688	-0.163947	-0.00708176
0.187	-0.164044	-0.0416798	-0.0362203	-0.0396961	-0.0713903	-0.060799	-0.0854632	-0.146257	-0.166251	-0.00826951
0.188	-0.15539	-0.0398865	-0.0396225	-0.038848	-0.0716612	-0.0601764	-0.0820001	-0.144419	-0.168251	-0.00817532
0.189	-0.145555	-0.0384579	-0.0439847	-0.0382498	-0.0714325	-0.0591278	-0.0780926	-0.141715	-0.169803	-0.00677532
0.19	-0.13522	-0.0374693	-0.0490922	-0.0378311	-0.0705827	-0.0580037	-0.0739975	-0.137797	-0.170836	-0.0045016
0.191	-0.125075	-0.0370167	-0.0545269	-0.0375584	-0.06918	-0.0574072	-0.0698942	-0.132796	-0.171196	-0.00178037
0.192	-0.115767	-0.0371781	-0.0598151	-0.0374966	-0.0672902	-0.0578752	-0.0656863	-0.126962	-0.170702	0.00100492
0.193	-0.107822	-0.0379638	-0.0646534	-0.037727	-0.0647772	-0.0597307	-0.061172	-0.120312	-0.16933	0.00354383
0.194	-0.101471	-0.0393064	-0.0687921	-0.0383037	-0.061589	-0.0631448	-0.0563162	-0.112659	-0.167049	0.00567503
0.195	-0.096677	-0.0409681	-0.0719415	-0.0391656	-0.0579699	-0.0680446	-0.0512182	-0.103793	-0.163733	0.00731088
0.196	-0.0932941	-0.0425263	-0.0738786	-0.0401075	-0.0541366	-0.0738929	-0.0459744	-0.093753	-0.15944	0.00838187
0.197	-0.0911627	-0.0436088	-0.0745405	-0.040851	-0.0501264	-0.0796346	-0.0407555	-0.0828957	-0.154533	0.00884326
0.198	-0.0901895	-0.0440675	-0.0740133	-0.0411577	-0.0459873	-0.083696	-0.0358546	-0.071684	-0.149676	0.00853965
0.199	-0.0904274	-0.0438194	-0.07246	-0.0409341	-0.0418178	-0.0839396	-0.031458	-0.0606681	-0.145876	0.00711453
0.2	-0.0919206	-0.0427332	-0.0700603	-0.0402625	-0.0377412	-0.0780239	-0.027562	-0.050514	-0.144088	0.00416735
0.201	-0.0944517	-0.0407185	-0.0669617	-0.039366	-0.0339681	-0.0642783	-0.024184	-0.0419389	-0.144573	-0.000522105
0.202	-0.0975773	-0.0377623	-0.0633345	-0.0384329	-0.0307826	-0.0422801	-0.021493	-0.0354543	-0.146674	-0.00674959
0.203	-0.100757	-0.0339868	-0.059436	-0.0375087	-0.0283638	-0.0127952	-0.019737	-0.0310017	-0.149009	-0.0138184
0.204	-0.10341	-0.0297066	-0.0555004	-0.036601	-0.0266821	0.0221314	-0.0190956	-0.0282463	-0.149769	-0.0209588
0.205	-0.105097	-0.0253339	-0.0517006	-0.0357547	-0.0255691	0.0587753	-0.0196619	-0.0270591	-0.147158	-0.0278295
0.206	-0.105734	-0.0211649	-0.0481763	-0.0351491	-0.0248364	0.0923496	-0.0214424	-0.0273503	-0.139944	-0.0345176
0.207	-0.105526	-0.0172974	-0.0449946	-0.035127	-0.0243901	0.118706	-0.0242357	-0.0288328	-0.127643	-0.0411751
0.208	-0.104783	-0.013847	-0.0422558	-0.0360106	-0.0241075	0.135349	-0.0276594	-0.0312141	-0.110278	-0.0478471
0.209	-0.103805	-0.0110875	-0.0401758	-0.0379762	-0.0236977	0.141375	-0.0313642	-0.0343838	-0.0883329	-0.0544933
0.21	-0.102763	-0.00924219	-0.0389213	-0.0410003	-0.0229177	0.137139	-0.035166	-0.0382512	-0.0628307	-0.0609048
0.211	-0.10166	-0.00821682	-0.0384617	-0.0448428	-0.0217249	0.123977	-0.0389764	-0.0425252	-0.035142	-0.0666872
0.212	-0.100491	-0.0076602	-0.0386621	-0.0492022	-0.0201283	0.103928	-0.0426107	-0.0467123	-0.00673715	-0.0713561
0.213	-0.0993443	-0.00725031	-0.0394423	-0.0537511	-0.0180245	0.0793222	-0.0458255	-0.0502912	0.0209976	-0.0745111
0.214	-0.0982761	-0.00666522	-0.0407775	-0.0581032	-0.0152174	0.0524852	-0.0485985	-0.0528726	0.0468164	-0.0761143
0.215	-0.0972564	-0.00547545	-0.0425452	-0.0620412	-0.0116221	0.0256245	-0.0511754	-0.0543351	0.0695312	-0.0763693
0.216	-0.0963158	-0.00353573	-0.0444628	-0.0655506	-0.00740538	0.000603958	-0.0537164	-0.0549821	0.0881249	-0.0752501
0.217	-0.0956221	-0.00128036	-0.0463042	-0.0685743	-0.00290374	-0.0212825	-0.0560459	-0.0554725	0.101996	-0.0725331
0.218	-0.0953251	0.00054384	-0.0480052	-0.0710551	0.00149811	-0.0393018	-0.0580301	-0.0563806	0.110999	-0.068241
0.219	-0.0954023	0.00125256	-0.0495186	-0.0731002	0.00540349	-0.053223	-0.0599086	-0.0577943	0.115287	-0.0628309
0.22	-0.0956493	0.000530712	-0.050802	-0.0749069	0.0085002	-0.0631305	-0.0619199	-0.0595304	0.115284	-0.0570323
0.221	-0.0957477	-0.00159456	-0.0518711	-0.0766002	0.0106445	-0.0691738	-0.0639637	-0.0614483	0.111821	-0.0515976
0.222	-0.095439	-0.00509926	-0.0527643	-0.0781414	0.0117317	-0.0716065	-0.0657949	-0.0632784	0.105998	-0.047196
0.223	-0.094714	-0.00985114	-0.0534456	-0.0794539	0.0115867	-0.0708646	-0.06728	-0.0646477	0.0987559	-0.0442681
0.224	-0.093792	-0.0153945	-0.053706	-0.0805824	0.0101718	-0.0675956	-0.0683716	-0.0653803	0.0905905	-0.0427775
0.225	-0.0928415	-0.0213401	-0.0532926	-0.0815492	0.00785884	-0.0627377	-0.0690756	-0.0655183	0.0818718	-0.0423608
0.226	-0.0917749	-0.0275991	-0.0520866	-0.0822291	0.00531593	-0.0573717	-0.0694978	-0.0651533	0.0733322	-0.0427821
0.227	-0.0904124	-0.034055	-0.0500487	-0.0824639	0.00311028	-0.05238	-0.0696634	-0.0642629	0.0656975	-0.0440218
0.228	-0.0887742	-0.0403476	-0.0471475	-0.0821979	0.00156414	-0.0481792	-0.0694542	-0.0627604	0.0591137	-0.046071
0.229	-0.0870605	-0.0459917	-0.0433692	-0.0815124	0.000873483	-0.0446976	-0.0688369	-0.0606837	0.0532816	-0.048816
0.23	-0.0854574	-0.0505712	-0.0387939	-0.0805081	0.00110233	-0.0415816	-0.0679293	-0.0580678	0.0479211	-0.0520208
0.231	-0.0840972	-0.0538058	-0.0336409	-0.0792348	0.0022478	-0.0384703	-0.0668768	-0.054906	0.0431208	-0.0552977
0.232	-0.0830381	-0.0554942	-0.0280841	-0.0777293	0.00429487	-0.0352102	-0.0657339	-0.0515593	0.0391633	-0.0580853
0.233	-0.0821915	-0.055536	-0.022218	-0.0758891	0.00685978	-0.0317965	-0.0644466	-0.0489317	0.0359959	-0.0598684
0.234	-0.081339	-0.0540543	-0.016319	-0.07343	0.00905156	-0.0281606	-0.0629838	-0.0480513	0.0332071	-0.0605666
0.235	-0.0802813	-0.0514026	-0.0107895	-0.0702231	0.00994885	-0.0242656	-0.0614344	-0.0493684	0.0304177	-0.0605588
0.236	-0.0789389	-0.0479879	-0.0058078	-0.0664856	0.00910068	-0.020269	-0.0599415	-0.0524376	0.0273948	-0.0602159
0.237	-0.07735	-0.0441942	-0.00129978	-0.0625023	0.00664385	-0.0163866	-0.0586043	-0.0564303	0.0239648	-0.0595815
0.238	-0.0757343	-0.0404386	0.00279231	-0.0584655	0.00298774	-0.012856	-0.0574008	-0.0609654	0.0199924	-0.0585779
0.239	-0.0743974	-0.0371174	0.00642346	-0.0546299	-0.00155478	-0.0100189	-0.0562592	-0.066179	0.0155265	-0.0571295
0.24	-0.0735173	-0.0344634	0.00952184	-0.0512149	-0.00674752	-0.00822503	-0.055196	-0.0718902	0.0109367	-0.0550128
0.241	-0.0732033	-0.03248	0.0120123	-0.0482491	-0.0123085	-0.00766497	-0.0541826	-0.0773126	0.00663891	-0.0519416
0.242	-0.0735365	-0.0310616	0.0138975	-0.0457189	-0.0179311	-0.00836054	-0.0529952	-0.0816527	0.00285916	-0.0478306
0.243	-0.0744431	-0.0301015	0.0153311	-0.0436393	-0.023347	-0.0103263	-0.051337	-0.08453	-0.000197919	-0.0430249
0.244	-0.0757485	-0.0294148	0.0164485	-0.0420425	-0.0283487	-0.0135674	-0.0490595	-0.086094	-0.0022211	-0.0382861
0.245	-0.0773387	-0.0287012	0.017235	-0.0410248	-0.0327067	-0.0179243	-0.0462348	-0.0867976	-0.0030117	-0.0341535
0.246	-0.0791219	-0.0276513	0.0176132	-0.0406604	-0.036196	-0.0230793	-0.0429556	-0.0868227	-0.00288505	-0.0305406
0.247	-0.0808787	-0.0260852	0.0173776	-0.0408539	-0.0387516	-0.0287137	-0.0392719	-0.0860431	-0.00251579	-0.0272709
0.248	-0.0823221	-0.0240095	0.0160678	-0.0413197	-0.0405051	-0.0346216	-0.0353761	-0.08457	-0.00231522	-0.0243983
0.249	-0.0832787	-0.0216033	0.0131598	-0.0417402	-0.0417195	-0.0406965	-0.0315337	-0.0829593	-0.00246565	-0.0220643
0.25	-0.0837108	-0.0191438	0.00839559	-0.0419797	-0.0427197	-0.0468074	-0.0278979	-0.0818987	-0.00324956	-0.0203255
0.251	-0.0836701	-0.0168647	0.00198739	-0.0420402	-0.043854	-0.0526527	-0.0245104	-0.0818263	-0.00481339	-0.0187773
0.252	-0.0832856	-0.0147712	-0.00535644	-0.0419603	-0.0454959	-0.0577954	-0.0213649	-0.0828439	-0.00705305	-0.0167271
0.253	-0.0827071	-0.0125167	-0.0126414	-0.041929	-0.0479408	-0.0618305	-0.0184612	-0.0848903	-0.00992889	-0.0140249
0.254	-0.0820687	-0.00980603	-0.0188672	-0.0422034	-0.0511698	-0.0645355	-0.0157787	-0.0877765	-0.0135332	-0.0112622
0.255	-0.0814978	-0.00697956	-0.0232934	-0.0429024	-0.0548853	-0.0659161	-0.0132575	-0.0911146	-0.0178442	-0.00895136
0.256	-0.0810884	-0.0048828	-0.0257026	-0.0440822	-0.0588215	-0.0661328	-0.0108656	-0.0944788	-0.0226143	-0.00670048
0.257	-0.0809117	-0.00431465	-0.0264761	-0.0459317	-0.0627381	-0.0654045	-0.00853157	-0.0976275	-0.0275061	-0.00369902
0.258	-0.0809928	-0.00571777	-0.0263958	-0.0487836	-0.0662455	-0.0639586	-0.00606077	-0.100576	-0.0320959	-4.09e-05
0.259	-0.0813012	-0.00908481	-0.0262567	-0.0527874	-0.069055	-0.0620907	-0.00331454	-0.103521	-0.0357898	0.00330101
0.26	-0.081901	-0.0140026	-0.0265523	-0.0576009	-0.0712041	-0.0601802	-0.00036792	-0.106576	-0.0380815	0.00574474
0.261	-0.0829134	-0.0198619	-0.0274203	-0.0626072	-0.0727893	-0.05849	0.00262908	-0.109631	-0.0387343	0.00736992
0.262	-0.0842353	-0.0259426	-0.0287447	-0.0672842	-0.0737568	-0.0570771	0.00557944	-0.112443	-0.0376248	0.00810697
0.263	-0.0855695	-0.0314289	-0.0302496	-0.0712385	-0.0739913	-0.0559674	0.00833617	-0.114764	-0.0347441	0.00740121
0.264	-0.0867142	-0.0356548	-0.031596	-0.0742	-0.0734288	-0.0551963	0.0106651	-0.116504	-0.0303336	0.004633
0.265	-0.0875796	-0.0383934	-0.0325124	-0.0761455	-0.0721631	-0.054633	0.0125044	-0.117736	-0.0249856	-0.000351328
0.266	-0.0880911	-0.0399045	-0.0328175	-0.0771877	-0.0704606	-0.0539347	0.0140439	-0.118644	-0.0196125	-0.00689802
0.267	-0.0882153	-0.0407005	-0.0324049	-0.0773293	-0.0686499	-0.0527465	0.0154336	-0.119568	-0.0150308	-0.0137984
0.268	-0.0879396	-0.0411985	-0.031354	-0.0765418	-0.066992	-0.0508624	0.0166822	-0.120815	-0.011645	-0.0203494
0.269	-0.0872731	-0.041468	-0.0300131	-0.0749723	-0.0655698	-0.04824	0.0177365	-0.122414	-0.00959877	-0.0267847
0.27	-0.0862926	-0.041279	-0.0289258	-0.0728888	-0.0643437	-0.0450026	0.0185808	-0.124215	-0.00887589	-0.0332686
0.271	-0.085115	-0.0403499	-0.0287044	-0.0705182	-0.0633093	-0.0413661	0.0193265	-0.12619	-0.00929144	-0.0391851
0.272	-0.0838269	-0.0384013	-0.0297776	-0.0679604	-0.0624477	-0.0374692	0.020014	-0.128467	-0.0105433	-0.0436659
0.273	-0.0825006	-0.0352529	-0.0320187	-0.065224	-0.0615757	-0.0333005	0.0204499	-0.130915	-0.0121813	-0.0462536
0.274	-0.0812365	-0.0310287	-0.0347376	-0.0623714	-0.0603959	-0.0288398	0.0203963	-0.132988	-0.0134106	-0.0468706
0.275	-0.0800238	-0.0260414	-0.037052	-0.0594698	-0.058638	-0.0242965	0.0198088	-0.134185	-0.0128159	-0.0456382
0.276	-0.0787045	-0.0206277	-0.0382198	-0.0564033	-0.0561254	-0.0202197	0.0188821	-0.134248	-0.00853037	-0.0432348
0.277	-0.0771472	-0.0151426	-0.037819	-0.0530378	-0.0527876	-0.017236	0.0178092	-0.1329	0.00105729	-0.041051
0.278	-0.0753281	-0.0098452	-0.0357531	-0.0495345	-0.0486465	-0.0156598	0.0165122	-0.129878	0.0167571	-0.0401579
0.279	-0.0732822	-0.0046755	-0.0321769	-0.0462119	-0.0437961	-0.0154903	0.0148179	-0.125125	0.038403	-0.040167
0.28	-0.070944	0.00076096	-0.0274775	-0.0431777	-0.0384097	-0.0165304	0.0128267	-0.118775	0.0648248	-0.0397605
0.281	-0.0681025	0.00698097	-0.0221584	-0.0403214	-0.0328171	-0.018403	0.0107557	-0.110925	0.0939993	-0.0385501
0.282	-0.0644766	0.014497	-0.0165945	-0.0375488	-0.0275102	-0.0206967	0.0085577	-0.101565	0.123526	-0.0377059
0.283	-0.059726	0.0237978	-0.0110181	-0.0348924	-0.0229791	-0.022968	0.0060541	-0.0907315	0.151255	-0.0379243
0.284	-0.0536029	0.0353627	-0.00557298	-0.0323895	-0.0195921	-0.0245657	0.00319006	-0.0786266	0.175542	-0.0379986
0.285	-0.0459997	0.0496082	-0.000119319	-0.0299275	-0.0175915	-0.0247542	2.55e-05	-0.0655759	0.195203	-0.0363926
0.286	-0.0367365	0.0668102	0.0058066	-0.0272838	-0.017032	-0.023095	-0.00328631	-0.0516737	0.209435	-0.0327739
0.287	-0.0255247	0.0871783	0.0127563	-0.0242672	-0.017732	-0.0195094	-0.00651564	-0.0366022	0.217483	-0.0275316
0.288	-0.0120576	0.1109	0.0211819	-0.0208406	-0.0194531	-0.0138737	-0.00941735	-0.0200642	0.218672	-0.0208881
0.289	0.00394991	0.138014	0.0314465	-0.0170785	-0.0219759	-0.00576849	-0.0117197	-0.00201044	0.213104	-0.0129575
0.29	0.022623	0.168305	0.0438927	-0.0130088	-0.0248842	0.00529496	-0.0131654	0.0174501	0.201674	-0.00420225
0.291	0.0438782	0.201365	0.0588104	-0.00856087	-0.0276672	0.0195418	-0.0136956	0.0380836	0.185235	0.00475092
0.292	0.0676206	0.236568	0.0764576	-0.00352615	-0.0300314	0.0367864	-0.0133606	0.0597607	0.164376	0.0136187
0.293	0.0938811	0.272914	0.097051	0.00239071	-0.0318223	0.0566431	-0.0120716	0.0825813	0.140126	0.0224585
0.294	0.122773	0.30903	0.120707	0.00940462	-0.0328531	0.0789581	-0.00967409	0.106695	0.114239	0.0313326
0.295	0.154306	0.343107	0.14751	0.0176776	-0.0328999	0.103861	-0.00604702	0.132255	0.0884843	0.0402813
0.296	0.188156	0.372889	0.177537	0.0274511	-0.031761	0.131427	-0.00113592	0.159614	0.0640652	0.0495148
0.297	0.223548	0.396139	0.210685	0.0390748	-0.0293713	0.161542	0.00497481	0.189305	0.041816	0.0593614
0.298	0.259174	0.411195	0.246416	0.052954	-0.025754	0.194007	0.0121067	0.221753	0.0224814	0.0702016
0.299	0.293144	0.417604	0.283551	0.0695132	-0.0208238	0.228573	0.0199984	0.257196	0.00676432	0.082569
0.3	0.323043	0.417063	0.320263	0.0891228	-0.0144352	0.264891	0.0284581	0.295665	-0.00480405	0.097141
0.301	0.346189	0.414031	0.354288	0.111882	-0.00657106	0.302558	0.0376353	0.336699	-0.0121138	0.114618
0.302	0.360231	0.415347	0.383362	0.137685	0.00276186	0.341237	0.0479092	0.379353	-0.0153892	0.135568
0.303	0.363921	0.428535	0.405666	0.166634	0.0137807	0.38085	0.0596864	0.422471	-0.0149037	0.160242
0.304	0.358044	0.459461	0.420169	0.199017	0.0269121	0.421774	0.0732502	0.464868	-0.0110698	0.188506
0.305	0.346356	0.510381	0.427035	0.234801	0.04244	0.464647	0.0886354	0.505509	-0.00438879	0.219894
0.306	0.33583	0.578729	0.428208	0.273465	0.0602459	0.509762	0.105934	0.543457	0.00507598	0.253609
0.307	0.335584	0.657282	0.427779	0.314194	0.0801192	0.556597	0.125481	0.577646	0.0175823	0.288745
0.308	0.354467	0.736076	0.431826	0.355789	0.102176	0.603914	0.147574	0.607263	0.033051	0.324634
0.309	0.398241	0.805304	0.447565	0.396473	0.126823	0.650438	0.172386	0.632591	0.0513393	0.360733
0.31	0.467509	0.858101	0.481661	0.433951	0.154514	0.695633	0.200103	0.655475	0.0728778	0.396381
0.311	0.557101	0.892361	0.538353	0.465719	0.185587	0.739982	0.230955	0.679309	0.0982504	0.430908
0.312	0.657136	0.91056	0.618209	0.489505	0.220131	0.785138	0.265185	0.70878	0.127464	0.463635
0.313	0.755599	0.917007	0.717695	0.503589	0.25787	0.834277	0.302768	0.749762	0.160058	0.493799
0.314	0.84176	0.914201	0.829794	0.507178	0.298251	0.891683	0.342961	0.808981	0.195491	0.520651
0.315	0.909259	0.901688	0.945653	0.50094	0.340477	0.961558	0.384365	0.89241	0.233104	0.54357
0.316	0.957048	0.878799	1.05638	0.487414	0.383397	1.04676	0.425393	1.00334	0.271997	0.562346
0.317	0.987052	0.848548	1.15414	0.471358	0.425418	1.14797	0.464538	1.14167	0.311288	0.577443
0.318	1.00042	0.81827	1.23177	0.459868	0.464634	1.26376	0.500423	1.30373	0.350299	0.590233
0.319	0.996399	0.795643	1.28176	0.461572	0.499113	1.39088	0.531903	1.48191	0.38819	0.60345
0.32	0.975242	0.783729	1.29677	0.484757	0.526962	1.52384	0.558545	1.66485	0.423849	0.621356
0.321	0.941856	0.779993	1.27334	0.534994	0.546279	1.6548	0.581505	1.83918	0.456555	0.649112
0.322	0.905886	0.780016	1.21562	0.613281	0.555411	1.77467	0.603936	1.99261	0.48612	0.691535
0.323	0.877663	0.782264	1.13542	0.71547	0.553537	1.87513	0.630536	2.11668	0.512341	0.752107
0.324	0.863693	0.790331	1.04776	0.832986	0.541297	1.95051	0.666832	2.20734	0.535219	0.832514
0.325	0.865114	0.811193	0.964614	0.954616	0.521503	1.99888	0.718477	2.2639	0.555882	0.932361
0.326	0.879156	0.851015	0.891449	1.0689	0.499815	2.02155	0.790352	2.28758	0.576865	1.04902
0.327	0.901984	0.911271	0.829137	1.16553	0.484652	2.02131	0.885461	2.28118	0.601543	1.17748
0.328	0.931356	0.985976	0.778585	1.23486	0.485892	2.00125	1.0041	2.24912	0.633742	1.3103
0.329	0.967408	1.06146	0.743669	1.26714	0.512561	1.96491	1.1438	2.19753	0.677809	1.43843
0.33	1.01123	1.12068	0.730586	1.25446	0.570315	1.91705	1.29958	2.13444	0.738043	1.55318
0.331	1.06287	1.14977	0.745061	1.19518	0.659726	1.86399	1.46423	2.0693	0.817206	1.6482
0.332	1.11894	1.14202	0.789445	1.09748	0.775819	1.81306	1.62873	2.0109	0.915638	1.72099
0.333	1.17029	1.09754	0.859652	0.977906	0.909137	1.77116	1.78336	1.96454	1.03152	1.77316
0.334	1.20345	1.02031	0.942919	0.854912	1.04774	1.74284	1.91945	1.93037	1.16109	1.80847
0.335	1.20617	0.914908	1.02006	0.741962	1.17835	1.72866	2.03086	1.90406	1.29858	1.83008
0.336	1.17228	0.784526	1.07228	0.645423	1.28621	1.72483	2.11465	1.87925	1.43652	1.83954
0.337	1.10264	0.63044	1.08718	0.567838	1.35635	1.72465	2.1706	1.84954	1.56676	1.8378
0.338	1.00282	0.452146	1.06037	0.512487	1.37774	1.72077	2.20004	1.8095	1.68216	1.82674
0.339	0.879551	0.247665	0.993246	0.485288	1.34875	1.70705	2.20507	1.75511	1.77809	1.80996
0.34	0.737939	0.013994	0.889762	0.492875	1.27896	1.67938	2.18902	1.68395	1.853	1.79208
0.341	0.580496	-0.252014	0.753985	0.538717	1.18508	1.63529	2.15739	1.59449	1.90797	1.77672
0.342	0.407327	-0.551599	0.588895	0.619259	1.08334	1.57314	2.11817	1.48512	1.94554	1.76475
0.343	0.216387	-0.881215	0.395814	0.721398	0.98454	1.49138	2.0806	1.3535	1.96845	1.7539
0.344	0.00372208	-1.23057	0.174147	0.824221	0.894474	1.38804	2.05275	1.19638	1.97893	1.74001
0.345	-0.235803	-1.58268	-0.0783959	0.905767	0.817177	1.26041	2.03909	1.00965	1.97878	1.71887
0.346	-0.506713	-1.91611	-0.364675	0.950171	0.757541	1.10454	2.03888	0.788372	1.97032	1.68763
0.347	-0.810135	-2.20868	-0.685582	0.950638	0.721493	0.915339	2.0465	0.527543	1.95717	1.6453
0.348	-1.14108	-2.44111	-1.03676	0.907941	0.713932	0.687438	2.05325	0.224064	1.94367	1.59214
0.349	-1.48729	-2.59949	-1.40647	0.82685	0.735298	0.416647	2.05005	-0.120748	1.93325	1.52867
0.35	-1.83038	-2.67675	-1.77589	0.7129	0.778247	0.102086	2.02932	-0.499756	1.92679	1.45456
0.351	-2.1489	-2.67279	-2.1218	0.570478	0.827348	-0.251933	1.98562	-0.900321	1.92193	1.36812
0.352	-2.42179	-2.59392	-2.42061	0.401992	0.863835	-0.635391	1.91558	-1.30571	1.91369	1.26621
0.353	-2.63137	-2.45147	-2.65227	0.207832	0.872809	-1.03334	1.81725	-1.69722	1.89605	1.14424
0.354	-2.76568	-2.26007	-2.80302	-0.013175	0.847394	-1.42759	1.68925	-2.05669	1.86377	0.99651
0.355	-2.81941	-2.03589	-2.86657	-0.263194	0.787917	-1.79905	1.53004	-2.36824	1.81354	0.816641
0.356	-2.79382	-1.79492	-2.84411	-0.544125	0.698736	-2.12985	1.33755	-2.61933	1.74408	0.598331
0.357	-2.69612	-1.55141	-2.74344	-0.85492	0.585119	-2.40523	1.10917	-2.80168	1.65544	0.337193
0.358	-2.53827	-1.3174	-2.5775	-1.18842	0.451192	-2.61466	0.841767	-2.9116	1.54813	0.0331486
0.359	-2.33494	-1.10238	-2.36248	-1.52999	0.299041	-2.7524	0.532561	-2.95005	1.42256	-0.308279
0.36	-2.10173	-0.912853	-2.11583	-1.85886	0.12834	-2.8177	0.181019	-2.92221	1.27875	-0.676163
0.361	-1.85409	-0.752347	-1.85454	-2.15161	-0.0636957	-2.81441	-0.20902	-2.83645	1.11566	-1.05534
0.362	-1.60607	-0.621872	-1.59378	-2.38633	-0.281685	-2.75002	-0.62837	-2.70321	0.930553	-1.42822
0.363	-1.36934	-0.520476	-1.34609	-2.54651	-0.53042	-2.63448	-1.06305	-2.53393	0.719376	-1.77704
0.364	-1.15272	-0.445755	-1.12086	-2.6237	-0.812072	-2.47917	-1.49578	-2.34013	0.477894	-2.08567
0.365	-0.961929	-0.394343	-0.924347	-2.61802	-1.12312	-2.29588	-1.90779	-2.13251	0.203428	-2.34113
0.366	-0.799858	-0.362394	-0.759845	-2.53693	-1.45256	-2.09596	-2.28083	-1.92062	-0.103434	-2.5347
0.367	-0.667111	-0.345925	-0.627969	-2.39316	-1.78251	-1.8896	-2.59917	-1.7127	-0.437807	-2.66229
0.368	-0.562564	-0.340956	-0.527179	-2.20255	-2.09107	-1.6852	-2.85101	-1.51537	-0.790271	-2.72397
0.369	-0.483819	-0.343798	-0.454444	-1.98203	-2.35621	-1.48924	-3.02906	-1.33315	-1.14749	-2.7233
0.37	-0.427684	-0.351395	-0.405723	-1.74788	-2.55945	-1.30648	-3.13075	-1.16865	-1.49375	-2.66662
0.371	-0.390567	-0.361397	-0.376448	-1.51445	-2.68828	-1.13999	-3.15813	-1.02319	-1.81308	-2.56261
0.372	-0.368737	-0.372037	-0.362046	-1.29323	-2.73744	-0.991434	-3.11721	-0.897247	-2.09112	-2.42155
0.373	-0.358548	-0.382002	-0.358353	-1.09229	-2.70855	-0.861511	-3.0171	-0.790468	-2.31642	-2.25421
0.374	-0.356702	-0.390465	-0.36177	-0.916385	-2.60905	-0.750109	-2.86907	-0.701557	-2.4812	-2.07099
0.375	-0.36038	-0.397058	-0.369204	-0.767571	-2.45084	-0.656199	-2.68524	-0.628517	-2.58191	-1.88126
0.376	-0.367244	-0.401655	-0.377993	-0.645915	-2.24871	-0.578097	-2.47746	-0.568922	-2.61939	-1.69285
0.377	-0.37535	-0.404325	-0.386044	-0.549854	-2.01862	-0.513857	-2.25679	-0.520137	-2.59809	-1.51179
0.378	-0.383135	-0.405271	-0.392171	-0.47666	-1.77586	-0.461453	-2.03305	-0.479849	-2.52496	-1.34249
0.379	-0.389551	-0.40457	-0.396056	-0.423033	-1.53377	-0.418915	-1.81439	-0.446308	-2.40877	-1.18778
0.38	-0.394101	-0.402236	-0.397757	-0.385492	-1.30309	-0.384331	-1.60709	-0.41798	-2.25958	-1.0491
0.381	-0.396616	-0.398465	-0.397434	-0.360726	-1.09181	-0.355796	-1.41562	-0.393442	-2.08787	-0.927042
0.382	-0.397101	-0.393551	-0.395299	-0.34567	-0.905212	-0.331552	-1.24275	-0.371595	-1.90364	-0.821663
0.383	-0.395705	-0.387711	-0.391548	-0.337401	-0.746148	-0.310192	-1.08966	-0.351739	-1.71568	-0.732415
0.384	-0.392665	-0.381064	-0.386281	-0.333253	-0.615303	-0.290711	-0.956465	-0.333428	-1.53095	-0.65806
0.385	-0.388314	-0.373663	-0.379677	-0.330968	-0.511575	-0.27242	-0.842612	-0.316185	-1.35481	-0.59671
0.386	-0.383073	-0.365666	-0.372192	-0.328793	-0.432458	-0.254854	-0.746965	-0.299458	-1.19146	-0.546184
0.387	-0.377316	-0.357464	-0.364271	-0.32567	-0.374475	-0.23774	-0.667772	-0.282884	-1.04365	-0.50453
0.388	-0.371291	-0.349607	-0.356088	-0.321263	-0.333708	-0.220959	-0.602666	-0.26656	-0.912489	-0.470149
0.389	-0.365183	-0.34258	-0.347766	-0.315691	-0.306384	-0.204439	-0.549103	-0.251016	-0.798014	-0.441453
0.39	-0.359201	-0.336686	-0.339564	-0.309267	-0.289168	-0.188164	-0.504824	-0.236748	-0.69958	-0.416755
0.391	-0.353517	-0.332052	-0.331731	-0.302309	-0.279068	-0.172179	-0.467806	-0.223856	-0.615975	-0.394589
0.392	-0.348189	-0.328639	-0.324423	-0.295044	-0.273423	-0.156586	-0.436194	-0.212218	-0.545489	-0.373989
0.393	-0.343239	-0.326221	-0.317754	-0.287613	-0.27006	-0.141655	-0.408509	-0.201723	-0.486129	-0.35446
0.394	-0.338727	-0.324354	-0.311843	-0.280143	-0.267517	-0.127762	-0.383744	-0.192462	-0.436134	-0.335761
0.395	-0.334654	-0.32256	-0.306768	-0.272801	-0.265043	-0.115222	-0.361164	-0.184709	-0.394422	-0.317728
0.396	-0.330944	-0.320653	-0.302486	-0.265686	-0.262207	-0.104303	-0.340191	-0.178441	-0.360276	-0.300268
0.397	-0.32762	-0.318642	-0.298808	-0.258726	-0.258724	-0.0951692	-0.320362	-0.173112	-0.332543	-0.283382
0.398	-0.324804	-0.316428	-0.295489	-0.251828	-0.254555	-0.0878292	-0.301324	-0.168026	-0.309592	-0.267023
0.399	-0.322528	-0.313911	-0.292333	-0.245016	-0.249821	-0.0823019	-0.282928	-0.16278	-0.290174	-0.250926
0.4	-0.320653	-0.311179	-0.289188	-0.238379	-0.24459	-0.0786213	-0.265286	-0.157405	-0.273706	-0.234771
0.401	-0.318914	-0.308413	-0.285831	-0.232013	-0.238795	-0.0765939	-0.248673	-0.152016	-0.259576	-0.218492
0.402	-0.317098	-0.305758	-0.281996	-0.226071	-0.232417	-0.0757083	-0.233284	-0.146391	-0.24679	-0.202294
0.403	-0.315204	-0.303221	-0.277555	-0.220743	-0.225659	-0.075367	-0.219102	-0.140168	-0.234564	-0.186474
0.404	-0.313305	-0.300631	-0.272621	-0.216163	-0.218889	-0.0752051	-0.206072	-0.133338	-0.222762	-0.171345
0.405	-0.31138	-0.29783	-0.267451	-0.212309	-0.212445	-0.0751521	-0.19434	-0.126271	-0.211411	-0.157075
0.406	-0.309379	-0.29461	-0.262231	-0.208972	-0.206421	-0.075227	-0.184162	-0.119233	-0.200181	-0.143708
0.407	-0.30733	-0.290534	-0.257097	-0.205953	-0.200627	-0.0754321	-0.175576	-0.112159	-0.18865	-0.131355
0.408	-0.305437	-0.28527	-0.252257	-0.203287	-0.194861	-0.0757871	-0.168272	-0.104981	-0.176897	-0.120133
0.409	-0.304047	-0.278943	-0.247841	-0.201155	-0.189192	-0.0762996	-0.16165	-0.0978753	-0.165576	-0.110133
0.41	-0.303329	-0.272045	-0.243812	-0.199568	-0.183864	-0.0769592	-0.155116	-0.0910036	-0.155274	-0.101576
0.411	-0.302981	-0.265192	-0.240111	-0.198303	-0.179029	-0.0777029	-0.148442	-0.0842834	-0.146186	-0.0946413
0.412	-0.302395	-0.258894	-0.236704	-0.197047	-0.174618	-0.0783914	-0.141688	-0.0777991	-0.138437	-0.0892521
0.413	-0.301063	-0.25339	-0.23345	-0.195542	-0.170532	-0.07889	-0.134906	-0.0720463	-0.131953	-0.0852769
0.414	-0.298773	-0.248806	-0.22988	-0.193697	-0.166755	-0.0790895	-0.128092	-0.0672461	-0.126371	-0.0827983
0.415	-0.295436	-0.245354	-0.225164	-0.191503	-0.163268	-0.0789012	-0.121202	-0.0629414	-0.121535	-0.0821113
0.416	-0.290957	-0.243103	-0.218542	-0.189083	-0.160034	-0.0782531	-0.114086	-0.0587965	-0.117453	-0.0833241
0.417	-0.285384	-0.24174	-0.209889	-0.186776	-0.156984	-0.0770326	-0.106762	-0.0552317	-0.113927	-0.0859594
0.418	-0.278905	-0.24075	-0.199814	-0.184869	-0.153955	-0.0751043	-0.0996932	-0.0527962	-0.110618	-0.0892332
0.419	-0.27172	-0.239666	-0.189408	-0.183455	-0.150786	-0.072492	-0.0934535	-0.0514539	-0.107247	-0.0925111
0.42	-0.264118	-0.238203	-0.179828	-0.182476	-0.14746	-0.0693796	-0.0883602	-0.0508626	-0.103857	-0.0952424
0.421	-0.256497	-0.236252	-0.171886	-0.181759	-0.14413	-0.0657128	-0.0845785	-0.0508746	-0.100779	-0.0968934
0.422	-0.249185	-0.233786	-0.165946	-0.181127	-0.140939	-0.0609173	-0.0823842	-0.0515437	-0.097866	-0.0972689
0.423	-0.242415	-0.230859	-0.162083	-0.180453	-0.137935	-0.0541754	-0.0819454	-0.0529017	-0.0935775	-0.0966425
0.424	-0.236431	-0.227678	-0.160252	-0.179644	-0.135146	-0.0449318	-0.082841	-0.0547192	-0.0853925	-0.0953537
0.425	-0.231414	-0.224466	-0.160257	-0.178687	-0.132524	-0.0330917	-0.0842179	-0.0565412	-0.0713187	-0.0935101
0.426	-0.227355	-0.221273	-0.161659	-0.177643	-0.129886	-0.0190076	-0.0854073	-0.0580311	-0.0506074	-0.0912572
0.427	-0.224114	-0.217991	-0.163953	-0.176482	-0.12706	-0.00347408	-0.0861025	-0.05909	-0.0235669	-0.0889791
0.428	-0.221506	-0.214476	-0.166735	-0.175106	-0.123936	0.0123461	-0.086121	-0.0597139	0.00851305	-0.0870767
0.429	-0.219274	-0.210632	-0.169709	-0.173486	-0.12038	0.0270188	-0.0853308	-0.0598043	0.0435638	-0.0857419
0.43	-0.217133	-0.206438	-0.172687	-0.171569	-0.116426	0.0390012	-0.0838184	-0.0591349	0.0792827	-0.0849132
0.431	-0.214887	-0.201976	-0.175538	-0.169259	-0.112376	0.0468666	-0.0818437	-0.0575816	0.113412	-0.0844904
0.432	-0.212395	-0.197414	-0.17809	-0.166547	-0.108498	0.0495567	-0.0795311	-0.0552665	0.143744	-0.0845637
0.433	-0.2095	-0.19289	-0.180083	-0.163565	-0.105054	0.0467484	-0.0769537	-0.0524703	0.168342	-0.085223
0.434	-0.206033	-0.188493	-0.181229	-0.160479	-0.102429	0.0389432	-0.0744895	-0.0494828	0.185824	-0.0863592
0.435	-0.201983	-0.184322	-0.181376	-0.15733	-0.100741	0.0271554	-0.0726547	-0.0465424	0.195401	-0.0878645
0.436	-0.197603	-0.180506	-0.180497	-0.154185	-0.0996386	0.0126388	-0.0716486	-0.0438599	0.196939	-0.0897737
0.437	-0.193125	-0.177259	-0.178544	-0.151309	-0.0987104	-0.00330517	-0.0713261	-0.0416264	0.190968	-0.0921251
0.438	-0.188585	-0.174762	-0.175525	-0.148952	-0.097845	-0.0194405	-0.0714961	-0.0400606	0.178244	-0.0948284
0.439	-0.183982	-0.172838	-0.17165	-0.14707	-0.0971502	-0.0346875	-0.0720123	-0.0394097	0.159353	-0.0976849
0.44	-0.179403	-0.171007	-0.167137	-0.1455	-0.0967723	-0.0482859	-0.0726495	-0.0396563	0.134949	-0.100502
0.441	-0.17499	-0.168974	-0.162116	-0.144301	-0.0967775	-0.059834	-0.0730835	-0.0403765	0.10612	-0.103077
0.442	-0.17077	-0.166793	-0.156821	-0.143575	-0.097079	-0.0691639	-0.0729891	-0.0412828	0.0743367	-0.105152
0.443	-0.166687	-0.164594	-0.151512	-0.143193	-0.097521	-0.0762612	-0.0722077	-0.0424824	0.0411049	-0.10657
0.444	-0.162746	-0.162336	-0.146267	-0.142878	-0.097899	-0.0813066	-0.070869	-0.0437731	0.00783398	-0.107284
0.445	-0.158953	-0.159894	-0.141137	-0.142407	-0.0979897	-0.0845815	-0.0692035	-0.0444476	-0.0240713	-0.107283
0.446	-0.155159	-0.15719	-0.136293	-0.141747	-0.097637	-0.0863653	-0.0672504	-0.0441452	-0.0531454	-0.106687
0.447	-0.150918	-0.154163	-0.131889	-0.140881	-0.0966855	-0.0869957	-0.0649153	-0.0432373	-0.0781574	-0.105672
0.448	-0.145826	-0.150814	-0.127936	-0.13963	-0.0950446	-0.0867675	-0.0622608	-0.0421942	-0.0984975	-0.104278
0.449	-0.139892	-0.147199	-0.124354	-0.137777	-0.092856	-0.0858514	-0.0596023	-0.0410203	-0.113999	-0.102369
0.45	-0.133291	-0.143397	-0.121136	-0.13527	-0.0904343	-0.0843894	-0.0572692	-0.03963	-0.124623	-0.0998073
0.451	-0.126262	-0.139562	-0.118392	-0.132297	-0.0880823	-0.0824355	-0.0553476	-0.0383382	-0.130461	-0.0966326
0.452	-0.119291	-0.135896	-0.116215	-0.129189	-0.0859731	-0.0798308	-0.0537798	-0.0374657	-0.131841	-0.0929803
0.453	-0.112993	-0.13257	-0.114572	-0.126188	-0.0841743	-0.0763953	-0.0525645	-0.0368221	-0.129512	-0.0889314
0.454	-0.107754	-0.129742	-0.113322	-0.123314	-0.0827034	-0.0722432	-0.0517741	-0.036028	-0.124625	-0.0846321
0.455	-0.103613	-0.127542	-0.112277	-0.120509	-0.0815337	-0.0676577	-0.0515372	-0.0351526	-0.118262	-0.0804857
0.456	-0.100372	-0.125954	-0.111139	-0.117847	-0.0805709	-0.0628473	-0.0518569	-0.0345412	-0.111034	-0.0769519
0.457	-0.0978089	-0.124804	-0.109535	-0.115479	-0.0796414	-0.0579981	-0.0524826	-0.0341123	-0.10336	-0.0742343
0.458	-0.0958591	-0.123846	-0.107296	-0.11342	-0.0786069	-0.0533344	-0.0531882	-0.0334201	-0.0959499	-0.0722981
0.459	-0.0944872	-0.123017	-0.104456	-0.111485	-0.0774506	-0.0491211	-0.0538559	-0.0322866	-0.0895745	-0.0710311
0.46	-0.093588	-0.122651	-0.101084	-0.109521	-0.076118	-0.0456695	-0.0542057	-0.0307911	-0.0843521	-0.0702944
0.461	-0.09314	-0.123159	-0.0973608	-0.10763	-0.0744428	-0.0432661	-0.0538874	-0.0287642	-0.0797908	-0.0698267
0.462	-0.0931515	-0.124602	-0.0935963	-0.106011	-0.0724327	-0.0420299	-0.052856	-0.0258651	-0.0755202	-0.0693122
0.463	-0.0935463	-0.126615	-0.0900448	-0.104775	-0.0703755	-0.0418583	-0.051363	-0.0221894	-0.0715654	-0.0685531
0.464	-0.0941714	-0.128504	-0.086792	-0.103901	-0.068567	-0.0425278	-0.049565	-0.0184765	-0.0682584	-0.0674245
0.465	-0.0947631	-0.129527	-0.0837856	-0.103171	-0.0671803	-0.0437684	-0.0473809	-0.015569	-0.0660495	-0.0659472
0.466	-0.0950021	-0.129189	-0.0809937	-0.102286	-0.0663457	-0.0452716	-0.0448517	-0.01373	-0.0649376	-0.0643426
0.467	-0.0946609	-0.127248	-0.0785459	-0.10112	-0.0660921	-0.0466554	-0.0423664	-0.0128432	-0.0642312	-0.0628013
0.468	-0.0936343	-0.123611	-0.076599	-0.0996439	-0.0662222	-0.0474789	-0.0403833	-0.0132076	-0.0632511	-0.0613633
0.469	-0.0918644	-0.118413	-0.0751736	-0.097682	-0.0664877	-0.0474089	-0.0391945	-0.0153076	-0.0621016	-0.0600621
0.47	-0.089362	-0.112031	-0.0741657	-0.0950119	-0.0667763	-0.046357	-0.0388945	-0.0188412	-0.0613418	-0.0590452
0.471	-0.0862637	-0.104924	-0.0733727	-0.0916726	-0.0670592	-0.0444625	-0.0393874	-0.0229331	-0.0611345	-0.058369
0.472	-0.0828201	-0.0975037	-0.0725987	-0.0880222	-0.0673741	-0.0419679	-0.0405667	-0.0270585	-0.061183	-0.0577601
0.473	-0.0793872	-0.0898413	-0.0717548	-0.084463	-0.0678073	-0.0390932	-0.0423924	-0.031122	-0.0611312	-0.0567864
0.474	-0.076295	-0.0816016	-0.0707968	-0.0811092	-0.0684376	-0.0360251	-0.0447065	-0.0349613	-0.0608008	-0.0551604
0.475	-0.0736084	-0.0726721	-0.0696909	-0.0778503	-0.0692437	-0.0329234	-0.0471687	-0.0381395	-0.0603119	-0.0527256
0.476	-0.0711444	-0.0635551	-0.0684498	-0.0746088	-0.0700535	-0.0298905	-0.0494434	-0.0403103	-0.0599235	-0.049243
0.477	-0.0687551	-0.0550646	-0.0670904	-0.071387	-0.0706901	-0.0270824	-0.0513985	-0.0414895	-0.0597654	-0.0444567
0.478	-0.0664109	-0.048071	-0.0656544	-0.0682468	-0.0710343	-0.0247647	-0.0530462	-0.04174	-0.0598088	-0.0383583
0.479	-0.0640519	-0.0433302	-0.0642445	-0.0652501	-0.0710138	-0.0230774	-0.0543669	-0.0409009	-0.0599367	-0.0312102
0.48	-0.0616145	-0.04125	-0.0629186	-0.0623873	-0.070636	-0.0218609	-0.0553597	-0.0388239	-0.0600169	-0.0235254
0.481	-0.0590838	-0.0418145	-0.0617234	-0.0596686	-0.069921	-0.0207586	-0.0561637	-0.0358704	-0.0599098	-0.0159937
0.482	-0.0564271	-0.0445791	-0.060823	-0.0570838	-0.0688827	-0.0194028	-0.0568484	-0.0329215	-0.0594139	-0.0091582
0.483	-0.0536946	-0.0488471	-0.0603633	-0.0545182	-0.0676181	-0.0176522	-0.057178	-0.0307389	-0.0582532	-0.00335779
0.484	-0.0511195	-0.0539681	-0.0602403	-0.0519343	-0.0663421	-0.0157211	-0.0569674	-0.0297306	-0.0561241	0.00116952
0.485	-0.048953	-0.0593847	-0.0601975	-0.0493745	-0.0652998	-0.0138594	-0.0564211	-0.0302409	-0.0530303	0.00441172
0.486	-0.047261	-0.0645905	-0.0600478	-0.0468805	-0.0646329	-0.0120562	-0.055824	-0.032495	-0.0495189	0.00645309
0.487	-0.0459579	-0.0690907	-0.0597023	-0.0445938	-0.0643186	-0.0102883	-0.0553003	-0.0364435	-0.0461552	0.0072241
0.488	-0.0449207	-0.0724248	-0.0591369	-0.0426441	-0.0642014	-0.00871235	-0.0549221	-0.04191	-0.0428034	0.00681526
0.489	-0.0439575	-0.074409	-0.0584186	-0.0409895	-0.0641266	-0.00741127	-0.0547833	-0.0486465	-0.03874	0.0057497
0.49	-0.042868	-0.0751774	-0.0577087	-0.0394845	-0.06396	-0.0062968	-0.0548939	-0.0562233	-0.0335966	0.00459623
0.491	-0.0416394	-0.0750104	-0.0571455	-0.0380294	-0.0634248	-0.00537805	-0.0550345	-0.0639971	-0.0278704	0.00357423
0.492	-0.0404266	-0.0742608	-0.0567588	-0.0366831	-0.0621589	-0.00487631	-0.054904	-0.0711716	-0.0223177	0.00267719
0.493	-0.0393567	-0.0732641	-0.0564501	-0.0355157	-0.06002	-0.00498658	-0.0543485	-0.0769237	-0.0173209	0.00208652
0.494	-0.0384767	-0.0723178	-0.0561671	-0.034368	-0.0572104	-0.00563158	-0.0533563	-0.080619	-0.0129988	0.00219973
0.495	-0.0378658	-0.0716656	-0.0561806	-0.0329503	-0.054093	-0.00664253	-0.0519734	-0.0821115	-0.00937952	0.0031899
0.496	-0.037625	-0.0713425	-0.0568566	-0.0311189	-0.0509414	-0.00808947	-0.0502575	-0.0818222	-0.00627896	0.0049009
0.497	-0.0377196	-0.071201	-0.058244	-0.0290503	-0.0477647	-0.0101684	-0.0483606	-0.0803919	-0.00330573	0.00714972
0.498	-0.0380061	-0.0710897	-0.0600676	-0.027092	-0.0444122	-0.0128983	-0.0465357	-0.0784702	-0.000218438	0.00961836
0.499	-0.0383867	-0.0708787	-0.0619798	-0.0254042	-0.0410454	-0.0160421	-0.0449276	-0.0767499	0.00259611	0.0115708
0.5	-0.0387659	-0.0703988	-0.0637914	-0.0239417	-0.0382254	-0.0192158	-0.0436621	-0.0756382	0.00440515	0.0122409
0.501	-0.0390175	-0.0695042	-0.0654396	-0.022662	-0.0363715	-0.0220047	-0.0431401	-0.0749189	0.0051081	0.0113046
0.502	-0.0391008	-0.0682308	-0.0668895	-0.0215177	-0.0355273	-0.023935	-0.0438892	-0.0741122	0.0053196	0.00878697
0.503	-0.0390184	-0.0667522	-0.0681564	-0.0204516	-0.0355294	-0.0245528	-0.0461749	-0.0731261	0.00532832	0.00490655
0.504	-0.0388255	-0.0651708	-0.0692177	-0.0194731	-0.036125	-0.0237309	-0.0498673	-0.0723612	0.00458395	9.01e-05
0.505	-0.0387444	-0.0635218	-0.0700131	-0.0186239	-0.0369971	-0.0217551	-0.0546627	-0.0721811	0.00246201	-0.00520104
0.506	-0.0389134	-0.0619448	-0.0706236	-0.0180282	-0.037794	-0.019086	-0.0604609	-0.0725531	-0.000894899	-0.0107564
0.507	-0.0391691	-0.0607294	-0.0712066	-0.0179384	-0.0383167	-0.0161459	-0.067297	-0.0732402	-0.00482323	-0.016377
0.508	-0.0392741	-0.0601457	-0.0717991	-0.018578	-0.0384766	-0.0132424	-0.0749431	-0.0740912	-0.0088535	-0.0213675
0.509	-0.0390533	-0.0601846	-0.0723614	-0.0199229	-0.0380799	-0.0105939	-0.0828917	-0.0751572	-0.0126546	-0.0248139
0.51	-0.0384036	-0.0604942	-0.0729079	-0.021705	-0.0369931	-0.00844713	-0.0906477	-0.0764524	-0.0157051	-0.0263987
0.511	-0.037369	-0.0606259	-0.0734982	-0.0236998	-0.0353595	-0.00705947	-0.0979379	-0.0776244	-0.0176656	-0.0264219
0.512	-0.0360596	-0.0603101	-0.0741558	-0.0258201	-0.0335072	-0.0065088	-0.104529	-0.0781649	-0.0187563	-0.0251314
0.513	-0.0345573	-0.0595007	-0.0747874	-0.0279754	-0.0317792	-0.00670329	-0.109954	-0.0777174	-0.0195148	-0.0227182
0.514	-0.0329184	-0.0582471	-0.075181	-0.030063	-0.0304994	-0.00748541	-0.113871	-0.0759106	-0.0203059	-0.0197794
0.515	-0.0311776	-0.0565689	-0.0751728	-0.0320812	-0.0300052	-0.00859649	-0.116486	-0.0723109	-0.0210315	-0.0170927
0.516	-0.0293706	-0.0545355	-0.074756	-0.0342539	-0.0305146	-0.009718	-0.118216	-0.0667466	-0.0214249	-0.0150376
0.517	-0.027567	-0.0525337	-0.0739842	-0.0368579	-0.0320332	-0.0105682	-0.119223	-0.0594021	-0.021457	-0.0136677
0.518	-0.0258788	-0.0512361	-0.0729406	-0.0398148	-0.0344521	-0.0109142	-0.119496	-0.0506086	-0.021094	-0.0132648
0.519	-0.0243998	-0.0512789	-0.0717858	-0.0427712	-0.03758	-0.0105113	-0.119211	-0.0407274	-0.0202173	-0.0142971
0.52	-0.0231089	-0.0530925	-0.0707244	-0.0454926	-0.0412137	-0.00911418	-0.118798	-0.0300752	-0.0192739	-0.0168482
0.521	-0.0218957	-0.0566802	-0.0699512	-0.0478157	-0.0451441	-0.00670719	-0.118487	-0.0189464	-0.0192454	-0.0205619
0.522	-0.0207415	-0.0613045	-0.06956	-0.0495719	-0.0490478	-0.00365108	-0.118036	-0.00776809	-0.0206162	-0.0249801
0.523	-0.0198102	-0.0656502	-0.0694069	-0.05077	-0.0526583	-0.000454927	-0.117163	0.00311056	-0.0229954	-0.029599
0.524	-0.0193799	-0.0685666	-0.0691358	-0.0515362	-0.055834	0.0025728	-0.115908	0.0136353	-0.0256775	-0.0338241
0.525	-0.0197698	-0.0696221	-0.0684833	-0.051978	-0.0583294	0.0053497	-0.114398	0.0236143	-0.0280806	-0.0371321
0.526	-0.0211818	-0.0688464	-0.067505	-0.0521785	-0.0598927	0.00772752	-0.112503	0.0324884	-0.0299066	-0.0392801
0.527	-0.0234528	-0.0663652	-0.0663083	-0.0521842	-0.0604646	0.00947096	-0.109912	0.0398961	-0.0311358	-0.040386
0.528	-0.0261322	-0.0624404	-0.0648081	-0.0520458	-0.0601042	0.0106254	-0.106508	0.0460733	-0.0319055	-0.0407305
0.529	-0.0287669	-0.0573863	-0.06302	-0.05185	-0.058918	0.0115521	-0.102452	0.0515817	-0.0325655	-0.040447
0.53	-0.0309537	-0.051429	-0.0612245	-0.0517104	-0.0569539	0.012515	-0.0979845	0.0568192	-0.0334418	-0.0396164
0.531	-0.03234	-0.0447198	-0.0597577	-0.051735	-0.0542031	0.0136644	-0.0933163	0.0618241	-0.034385	-0.0385447
0.532	-0.0327366	-0.0374003	-0.0588728	-0.0518771	-0.0508675	0.0155712	-0.08862	0.0664912	-0.034997	-0.0375589
0.533	-0.032189	-0.0297795	-0.0586356	-0.0519526	-0.0473254	0.0193823	-0.0842298	0.0708499	-0.0350075	-0.0366894
0.534	-0.0308689	-0.0223314	-0.0588591	-0.0518412	-0.0438178	0.0262308	-0.0806571	0.0751847	-0.0342392	-0.035942
0.535	-0.02891	-0.0153763	-0.0593026	-0.0515656	-0.0403908	0.0367122	-0.078191	0.0798488	-0.0327392	-0.0355681
0.536	-0.0264596	-0.0089691	-0.0599236	-0.0513328	-0.0370305	0.0508873	-0.0768122	0.0848703	-0.0309167	-0.0358259
0.537	-0.023745	-0.0032099	-0.0607979	-0.051448	-0.0338426	0.0682754	-0.0764288	0.0899075	-0.0291824	-0.0368797
0.538	-0.0209082	0.00151011	-0.0618779	-0.0520722	-0.0310672	0.0878328	-0.0768706	0.0944862	-0.0275949	-0.0388885
0.539	-0.017985	0.00466639	-0.0628939	-0.0530639	-0.0288553	0.108166	-0.0778368	0.0980696	-0.0259253	-0.0418721
0.54	-0.0151812	0.00587743	-0.0635321	-0.0540427	-0.0271667	0.127595	-0.0790263	0.100106	-0.0239616	-0.0456296
0.541	-0.0128433	0.00502301	-0.0636654	-0.0546892	-0.02586	0.144156	-0.0801954	0.100285	-0.0217754	-0.0498551
0.542	-0.0111471	0.00226354	-0.0632803	-0.054974	-0.024872	0.155836	-0.0810128	0.0986707	-0.019678	-0.0541474
0.543	-0.0101133	-0.00197271	-0.0624075	-0.0550235	-0.0242561	0.16096	-0.0810722	0.0953388	-0.0180632	-0.0581179
0.544	-0.00970578	-0.00706459	-0.0611679	-0.0548651	-0.0240307	0.158669	-0.0801734	0.0902032	-0.0173422	-0.061611
0.545	-0.00972717	-0.012378	-0.0596634	-0.0543791	-0.0241765	0.149121	-0.0784447	0.0833956	-0.0178181	-0.0646158
0.546	-0.00988855	-0.0174079	-0.0578823	-0.0534538	-0.0246264	0.133302	-0.0760805	0.0752474	-0.0195907	-0.0671227
0.547	-0.0100136	-0.0217294	-0.0558303	-0.0521437	-0.0252081	0.11273	-0.073262	0.0659576	-0.0226706	-0.069069
0.548	-0.0100879	-0.02499	-0.0536537	-0.0506227	-0.0258653	0.089205	-0.0704927	0.0558056	-0.0270449	-0.0702894
0.549	-0.0101904	-0.0270253	-0.0515825	-0.0490694	-0.0267714	0.0646174	-0.0684268	0.0453433	-0.0323569	-0.0706512
0.55	-0.0103419	-0.0278214	-0.0497804	-0.0476079	-0.0280639	0.0406234	-0.0673579	0.0350455	-0.0374916	-0.0702019
0.551	-0.0104217	-0.0274271	-0.0482364	-0.0462667	-0.029719	0.0184328	-0.0672849	0.0250158	-0.0406492	-0.0692197
0.552	-0.0102883	-0.0260198	-0.046787	-0.0450759	-0.0316444	-0.00102437	-0.0681999	0.0152214	-0.0399209	-0.0681649
0.553	-0.00987986	-0.0239587	-0.0452407	-0.0441107	-0.033695	-0.0170895	-0.07007	0.00592155	-0.0337092	-0.067387
0.554	-0.00913993	-0.0216486	-0.0435442	-0.0433842	-0.0357144	-0.0295265	-0.072676	-0.00247507	-0.0208474	-0.0670192
0.555	-0.00801531	-0.0193182	-0.0417696	-0.0428663	-0.0375435	-0.0385283	-0.0757011	-0.00994761	-0.000986179	-0.0671302
0.556	-0.00660733	-0.0170387	-0.0399329	-0.0425099	-0.0390219	-0.0445852	-0.0790162	-0.0166947	0.0249885	-0.0676485
0.557	-0.005218	-0.0148645	-0.0379312	-0.0423024	-0.0401068	-0.0481847	-0.0826989	-0.0224459	0.0549685	-0.0683403
0.558	-0.0041706	-0.0128166	-0.0357157	-0.0422659	-0.0408107	-0.0496645	-0.0866516	-0.0266742	0.0855561	-0.068986
0.559	-0.00363749	-0.0109291	-0.0334476	-0.0422537	-0.0411087	-0.0493667	-0.0903734	-0.0295535	0.112325	-0.0693606
0.56	-0.00363497	-0.00934562	-0.0313536	-0.0419481	-0.0410096	-0.0478198	-0.0933505	-0.0318674	0.131192	-0.0691099
0.561	-0.00403747	-0.00821599	-0.0294908	-0.041083	-0.0405445	-0.0456089	-0.095448	-0.0337453	0.139772	-0.0679474
0.562	-0.00466256	-0.00753318	-0.0277133	-0.0396379	-0.039823	-0.0429792	-0.0966787	-0.0344256	0.13758	-0.0658889
0.563	-0.00540561	-0.00705707	-0.0259104	-0.037817	-0.03911	-0.0398206	-0.0968905	-0.0335455	0.12557	-0.0631076
0.564	-0.00621472	-0.00640676	-0.0241608	-0.0357704	-0.0387021	-0.0360601	-0.0959538	-0.0316486	0.105759	-0.0598761
0.565	-0.00701987	-0.00531109	-0.0224436	-0.0335004	-0.0387439	-0.0317978	-0.0939949	-0.0292936	0.0808968	-0.0566521
0.566	-0.00766965	-0.00369643	-0.0204363	-0.0310099	-0.039103	-0.0272201	-0.0912528	-0.0265656	0.053678	-0.0538935
0.567	-0.00795647	-0.00156825	-0.0178644	-0.0282956	-0.0395029	-0.0226007	-0.0879614	-0.0235311	0.0259833	-0.0519113
0.568	-0.0077863	0.00100367	-0.0148175	-0.0253049	-0.0398665	-0.0181833	-0.0844026	-0.0205513	-0.000886718	-0.0508752
0.569	-0.0071599	0.00383693	-0.0116623	-0.0221164	-0.0403339	-0.0140581	-0.0809448	-0.0178617	-0.0255584	-0.0507868
0.57	-0.0060946	0.00666339	-0.00890348	-0.0189352	-0.0409475	-0.0102962	-0.077965	-0.0153597	-0.0466299	-0.0514879
0.571	-0.0046798	0.00912809	-0.00698603	-0.0158213	-0.041622	-0.00703283	-0.0756462	-0.0131453	-0.0633634	-0.0526978
0.572	-0.00296913	0.0108898	-0.0060114	-0.0127112	-0.0423546	-0.00441849	-0.073962	-0.0116535	-0.0761056	-0.054167
0.573	-0.000893469	0.0118393	-0.00572968	-0.00962046	-0.0432078	-0.00260238	-0.0729588	-0.0112413	-0.085749	-0.0558449
0.574	0.00154205	0.012065	-0.00586196	-0.0066411	-0.0441563	-0.00164642	-0.0727035	-0.0120733	-0.0928405	-0.0579109
0.575	0.00412263	0.0116288	-0.00629327	-0.00390208	-0.0450119	-0.00145284	-0.0728748	-0.0142053	-0.0974262	-0.0606371
0.576	0.00658813	0.0106039	-0.00693059	-0.00161387	-0.0454823	-0.00186396	-0.0730001	-0.0176009	-0.0994556	-0.063946
0.577	0.00879912	0.00922454	-0.00758957	3.07e-05	-0.0452943	-0.00283037	-0.0729643	-0.0220104	-0.0989594	-0.0672975
0.578	0.0106644	0.00775067	-0.00813917	0.00101443	-0.0442368	-0.00448699	-0.0728172	-0.0268551	-0.0960031	-0.0702177
0.579	0.0120614	0.00633788	-0.00864827	0.00147215	-0.0422544	-0.00696614	-0.0724746	-0.0314789	-0.0907853	-0.072537
0.58	0.0129149	0.00512672	-0.00922101	0.00154317	-0.0395251	-0.0101071	-0.0718817	-0.0354885	-0.0838191	-0.0741776
0.581	0.0132752	0.00421135	-0.00982818	0.00127091	-0.0363372	-0.013463	-0.0711563	-0.0386424	-0.0758819	-0.0750594
0.582	0.0133012	0.00354937	-0.0103801	0.000734722	-0.0329649	-0.0165821	-0.0704144	-0.0407102	-0.0678719	-0.075288
0.583	0.0131773	0.00293326	-0.0107943	8.02e-05	-0.0296499	-0.0192059	-0.0696781	-0.0417047	-0.0607395	-0.0752865
0.584	0.013006	0.00207242	-0.0110616	-0.000679956	-0.0265936	-0.0211991	-0.0690049	-0.0419759	-0.0550855	-0.0755328
0.585	0.0128414	0.000961162	-0.0112423	-0.00155526	-0.0240277	-0.0224803	-0.0684142	-0.0418752	-0.0508033	-0.0763121
0.586	0.0128369	-0.000122488	-0.0113947	-0.00241519	-0.022139	-0.0230433	-0.0677672	-0.0414166	-0.0476913	-0.0777306
0.587	0.0132113	-0.000961196	-0.0115683	-0.00314291	-0.0208873	-0.0229977	-0.066965	-0.0405668	-0.046118	-0.0797109
0.588	0.0139809	-0.0013569	-0.0117791	-0.00371413	-0.0201793	-0.0226218	-0.0660091	-0.0397683	-0.0464223	-0.0819907
0.589	0.0148653	-0.0011366	-0.0120033	-0.00408685	-0.0199014	-0.0221906	-0.0648434	-0.0397037	-0.0480039	-0.0842483
0.59	0.0156054	-0.000359166	-0.0121735	-0.00417931	-0.0197162	-0.0218458	-0.0634013	-0.0405096	-0.0496107	-0.0861747
0.591	0.0161728	0.000673737	-0.0121535	-0.00401687	-0.01934	-0.0216222	-0.0618027	-0.0416796	-0.0502886	-0.0874985
0.592	0.016677	0.00158445	-0.0118123	-0.00378774	-0.0188078	-0.0213314	-0.0604246	-0.042975	-0.0495397	-0.0881701
0.593	0.0172653	0.00208985	-0.0110943	-0.00373193	-0.0182637	-0.0206159	-0.0595434	-0.0444806	-0.0470761	-0.0883829
0.594	0.0180207	0.00214128	-0.0100153	-0.00396613	-0.0177841	-0.0191967	-0.0589053	-0.0455724	-0.0430072	-0.0883266
0.595	0.0188956	0.00197224	-0.00870897	-0.0043233	-0.0173897	-0.0169573	-0.0580729	-0.0454507	-0.0378163	-0.088036
0.596	0.0197397	0.00186244	-0.007385	-0.00443864	-0.0170671	-0.0139204	-0.057066	-0.0444543	-0.0319323	-0.0875092
0.597	0.0204465	0.00195527	-0.00613629	-0.00402983	-0.0167442	-0.0102984	-0.0561483	-0.0434326	-0.0256806	-0.0868775
0.598	0.0210427	0.00236402	-0.00493142	-0.00307845	-0.0162942	-0.00661434	-0.0553111	-0.042536	-0.0195764	-0.086203
0.599	0.021551	0.00317075	-0.00377936	-0.00183977	-0.0155812	-0.00349888	-0.0544988	-0.0413796	-0.0142333	-0.0853072
0.6	0.021965	0.00433938	-0.00276726	-0.000749634	-0.0145589	-0.00131266	-0.0540004	-0.0398388	-0.0100508	-0.0842124
0.601	0.0223842	0.00577116	-0.00198301	-0.000181827	-0.0133309	-0.000132368	-0.054127	-0.0383336	-0.00715983	-0.0834663
0.602	0.0229507	0.0073264	-0.00146823	-0.000193061	-0.0119718	0.000231235	-0.0547466	-0.0373946	-0.00546393	-0.0835816
0.603	0.0237036	0.0088227	-0.00125021	-0.000557975	-0.0104778	0.000209421	-0.0555568	-0.0372642	-0.00484168	-0.0844465
0.604	0.0245913	0.0100587	-0.00131591	-0.000967606	-0.00898865	0.000143192	-0.0565367	-0.0380873	-0.00543419	-0.0857181
0.605	0.0255405	0.0108082	-0.00147464	-0.00121619	-0.0077379	0.000140279	-0.0577662	-0.0400187	-0.00723133	-0.0874286
0.606	0.0264633	0.0109695	-0.00141301	-0.00131727	-0.00680617	0.000260613	-0.058997	-0.0429575	-0.00935172	-0.0897621
0.607	0.0272323	0.0107007	-0.000962189	-0.00142112	-0.00614476	0.000560985	-0.0597282	-0.0465871	-0.0105247	-0.0926121
0.608	0.0277126	0.0102459	-0.000202337	-0.00165291	-0.0057473	0.00103669	-0.0597551	-0.050632	-0.0103521	-0.0957715
0.609	0.0278305	0.00974135	0.000709245	-0.00208247	-0.00566154	0.00169486	-0.0592217	-0.0547883	-0.00953454	-0.099159
0.61	0.0275856	0.00924084	0.00169896	-0.00269188	-0.00590243	0.00260652	-0.0582112	-0.0586464	-0.00880565	-0.102556
0.611	0.0270249	0.00882104	0.00279756	-0.00324862	-0.00640613	0.00373937	-0.0568595	-0.0620499	-0.00806959	-0.105448
0.612	0.0262104	0.00860282	0.00406616	-0.00342748	-0.00705097	0.00473585	-0.055593	-0.0653336	-0.00699066	-0.107403
0.613	0.0252284	0.00869852	0.00545544	-0.00312066	-0.00774192	0.00505025	-0.0547525	-0.0687744	-0.00598944	-0.108356
0.614	0.0242475	0.009164	0.00685003	-0.00236556	-0.00850956	0.00442883	-0.054223	-0.0719534	-0.00598921	-0.108234
0.615	0.0234909	0.00993143	0.00814446	-0.00111231	-0.00946757	0.00301378	-0.053777	-0.0741036	-0.00751614	-0.106824
0.616	0.0231347	0.0108693	0.0092439	0.000672801	-0.0106286	0.000979897	-0.0535362	-0.0749869	-0.0104022	-0.104184
0.617	0.0232824	0.0118961	0.0101984	0.00293893	-0.0118969	-0.00150091	-0.0536763	-0.0750331	-0.0140161	-0.100761
0.618	0.0240357	0.0128995	0.0111317	0.0056524	-0.013226	-0.0040422	-0.0538963	-0.0746341	-0.017781	-0.0971659
0.619	0.0257929	0.0137147	0.0120392	0.00866472	-0.014659	-0.00620512	-0.0537324	-0.07378	-0.0216332	-0.0939554
0.62	0.0295385	0.0142088	0.0128786	0.011495	-0.0162823	-0.00781612	-0.0531558	-0.0725428	-0.025552	-0.0915669
0.621	0.0361654	0.0143391	0.0136874	0.0135179	-0.0180678	-0.0089971	-0.0523604	-0.0713477	-0.0289837	-0.0904545
0.622	0.0452852	0.0142177	0.0145226	0.0143441	-0.0197228	-0.0099469	-0.0513939	-0.0706016	-0.0313833	-0.0909942
0.623	0.0552799	0.0140885	0.0153841	0.0138794	-0.0208643	-0.0108063	-0.0503937	-0.0704004	-0.032633	-0.0931213
0.624	0.0643223	0.0142442	0.0161488	0.0122621	-0.0212646	-0.0117015	-0.0497449	-0.0706856	-0.0327924	-0.0963756
0.625	0.070964	0.0147985	0.0165987	0.00986551	-0.0208785	-0.0127443	-0.0497308	-0.0715349	-0.0321732	-0.100318
0.626	0.0743046	0.0155053	0.0166462	0.00713401	-0.0197195	-0.0140166	-0.0503173	-0.0729049	-0.0312192	-0.104498
0.627	0.0741848	0.0159899	0.0164234	0.00439767	-0.0178037	-0.015601	-0.0513954	-0.0742091	-0.0298388	-0.108173
0.628	0.0711292	0.0160386	0.0160605	0.00182606	-0.0153195	-0.0175405	-0.0529524	-0.0746784	-0.0274709	-0.110677
0.629	0.0659242	0.0156837	0.0155139	-0.000560255	-0.012627	-0.0196836	-0.0549103	-0.0740126	-0.0241932	-0.111881
0.63	0.0592731	0.0151382	0.0146132	-0.00278643	-0.010008	-0.021703	-0.0570583	-0.0723717	-0.0212464	-0.111914
0.631	0.0517257	0.0145719	0.0132219	-0.00480997	-0.00766362	-0.0232983	-0.0592862	-0.0698924	-0.0200305	-0.110756
0.632	0.043778	0.0140397	0.0113214	-0.00645577	-0.00586192	-0.0242743	-0.0617165	-0.0665888	-0.0210484	-0.108261
0.633	0.0359986	0.0135895	0.00904404	-0.00742185	-0.00477705	-0.0245846	-0.0644159	-0.0626746	-0.0240547	-0.104466
0.634	0.0290103	0.0132646	0.00665624	-0.00752449	-0.00430833	-0.0242757	-0.0670993	-0.0585327	-0.0286218	-0.0997623
0.635	0.0233511	0.0131008	0.00434408	-0.00686853	-0.00434476	-0.0232933	-0.0694148	-0.0544639	-0.0342869	-0.0946538
0.636	0.0193332	0.0131142	0.00221676	-0.00561247	-0.00491343	-0.0215189	-0.0712744	-0.0506868	-0.0405431	-0.0895627
0.637	0.0169799	0.0132447	0.000478647	-0.00384356	-0.00593645	-0.0189304	-0.0726421	-0.04737	-0.0470361	-0.0850327
0.638	0.0161005	0.0134305	-0.000736772	-0.0016667	-0.00714339	-0.015645	-0.0734782	-0.0446471	-0.0536793	-0.0816332
0.639	0.0164042	0.0136453	-0.00150782	0.000760542	-0.00825638	-0.0119729	-0.0739317	-0.0426872	-0.0603706	-0.0794684
0.64	0.0175624	0.0137851	-0.00201788	0.00320153	-0.00922149	-0.00833806	-0.0741196	-0.0417515	-0.0667018	-0.0782557
0.641	0.019284	0.0136981	-0.0024211	0.00550883	-0.0101627	-0.00512301	-0.0738399	-0.04211	-0.0720585	-0.0778702
0.642	0.0213352	0.0133138	-0.00273442	0.00769035	-0.0111273	-0.00265993	-0.0726819	-0.0437902	-0.0756965	-0.0782463
0.643	0.0235624	0.0126549	-0.00289416	0.00968346	-0.0120669	-0.00112933	-0.0703507	-0.0464825	-0.0768242	-0.07892
0.644	0.0258935	0.0118891	-0.0028022	0.011327	-0.0129819	-0.000175208	-0.0669423	-0.0496939	-0.0751777	-0.0792787
0.645	0.0281259	0.0113002	-0.0023021	0.012533	-0.0139503	0.00133726	-0.0628944	-0.0530254	-0.0712022	-0.0790527
0.646	0.0299141	0.011103	-0.00135877	0.0133855	-0.0149693	0.00479135	-0.0586864	-0.056374	-0.0652674	-0.0782084
0.647	0.0310262	0.0112932	-0.000182842	0.0140383	-0.0158409	0.010969	-0.0545743	-0.0597787	-0.0572777	-0.0766019
0.648	0.0314043	0.0116939	0.000874077	0.0146108	-0.0163817	0.0198312	-0.0505775	-0.0632474	-0.0472899	-0.0741342
0.649	0.0311406	0.0122508	0.00154629	0.015334	-0.0166113	0.0308194	-0.0466246	-0.06681	-0.0360568	-0.0713506
0.65	0.0304511	0.0130265	0.00182839	0.0165263	-0.0165618	0.0430952	-0.0425936	-0.0703832	-0.0249462	-0.0691651
0.651	0.0295829	0.0138519	0.00179307	0.0183697	-0.0161193	0.0556619	-0.0384015	-0.073724	-0.0153664	-0.0677757
0.652	0.0287893	0.0143526	0.0014451	0.0209189	-0.015183	0.0676143	-0.0340826	-0.0767419	-0.00806025	-0.0668914
0.653	0.0282245	0.0143728	0.000818742	0.0241451	-0.0137692	0.0784057	-0.0297244	-0.0795692	-0.0030165	-0.0669007
0.654	0.027831	0.014141	5.81e-05	0.0279257	-0.0119244	0.087921	-0.0255278	-0.0823692	8.08e-05	-0.0685503
0.655	0.0274866	0.013944	-0.000517534	0.0320923	-0.00971542	0.0963643	-0.0218191	-0.0851749	0.00159386	-0.0717309
0.656	0.0271535	0.0137863	-0.00063926	0.036366	-0.00725207	0.104007	-0.0187147	-0.0877277	0.00204911	-0.0756464
0.657	0.0268401	0.0134509	-0.000237042	0.0402044	-0.00461043	0.111024	-0.0160233	-0.0897136	0.00221304	-0.0798717
0.658	0.0265369	0.0128099	0.000705491	0.0430041	-0.00177592	0.117459	-0.013698	-0.0911433	0.00261758	-0.0844063
0.659	0.0261743	0.0118622	0.00205806	0.0446078	0.0013041	0.122996	-0.0120246	-0.0920978	0.00310149	-0.0889924
0.66	0.0256948	0.0106005	0.00360194	0.0452443	0.0045162	0.126683	-0.0112208	-0.0923297	0.00334662	-0.0931027
0.661	0.0251539	0.00921051	0.00529578	0.0450436	0.007549	0.127274	-0.0110858	-0.0914672	0.00347232	-0.0965953
0.662	0.0246349	0.00811761	0.00725749	0.0440191	0.0101501	0.1239	-0.0112229	-0.0894023	0.00360698	-0.0998694
0.663	0.0241656	0.00758137	0.00956419	0.0422905	0.012146	0.116322	-0.0114142	-0.0862139	0.00350444	-0.103121
0.664	0.0237538	0.00755177	0.01212	0.0400527	0.0133064	0.104896	-0.0115026	-0.0819623	0.00294622	-0.106034
0.665	0.0233906	0.00786442	0.014711	0.0375115	0.0133912	0.0904086	-0.0111246	-0.076796	0.00217476	-0.108286
0.666	0.0230106	0.00831943	0.0170771	0.0349982	0.0123383	0.0737833	-0.009911	-0.0711112	0.00166104	-0.109596
0.667	0.0226009	0.00870314	0.0189782	0.0328873	0.0103402	0.0559491	-0.00783947	-0.0653164	0.00158114	-0.109609
0.668	0.0222901	0.00885828	0.0202383	0.0312771	0.00762167	0.0379141	-0.00515773	-0.059361	0.00197951	-0.108394
0.669	0.0221664	0.00872471	0.0207031	0.0300676	0.00429236	0.0206227	-0.00207926	-0.0531859	0.00357777	-0.106506
0.67	0.0222025	0.00835672	0.0203534	0.0292278	0.000470545	0.00478226	0.00141594	-0.0476856	0.0082004	-0.104172
0.671	0.0223949	0.00786766	0.0193932	0.028781	-0.00364063	-0.00911462	0.00552623	-0.0441553	0.0180497	-0.100998
0.672	0.0227642	0.00727533	0.0180834	0.0287818	-0.00783197	-0.0209265	0.0104041	-0.0431412	0.0341917	-0.0967454
0.673	0.0232076	0.0064618	0.0166256	0.0292728	-0.0118731	-0.0307774	0.0160398	-0.0446587	0.0554836	-0.0918136
0.674	0.0235063	0.00531699	0.0151217	0.0301733	-0.0154056	-0.0387173	0.0222358	-0.0486313	0.0789001	-0.0867845
0.675	0.0235083	0.00384615	0.0135895	0.0312721	-0.0180777	-0.044843	0.0287159	-0.0544624	0.10105	-0.0820418
0.676	0.0231469	0.00215227	0.0121037	0.0323049	-0.0197451	-0.0494853	0.0352811	-0.0609394	0.119323	-0.0778611
0.677	0.0224182	0.000366884	0.0108428	0.0330199	-0.0204464	-0.0529793	0.0417285	-0.0671463	0.13183	-0.0743769
0.678	0.0215157	-0.00134939	0.0100044	0.0331545	-0.0202975	-0.0555069	0.047676	-0.0730167	0.137272	-0.0715738
0.679	0.0206863	-0.00277352	0.0096596	0.0325221	-0.0194708	-0.057229	0.0525988	-0.0786566	0.135415	-0.069428
0.68	0.0199269	-0.0036566	0.00966956	0.0311267	-0.0182277	-0.0582778	0.0559685	-0.0835542	0.127195	-0.0679063
0.681	0.0191812	-0.0037562	0.00980533	0.029043	-0.0167626	-0.0586609	0.0573544	-0.0868033	0.114111	-0.0670013
0.682	0.0186192	-0.00293214	0.00986589	0.0263409	-0.0151468	-0.0583819	0.0564896	-0.0879208	0.0977442	-0.0668242
0.683	0.0184048	-0.00117964	0.00977518	0.0231816	-0.0135537	-0.0574646	0.0533081	-0.0868188	0.0796713	-0.0675137
0.684	0.018487	0.00156331	0.00966289	0.0198743	-0.0121574	-0.0558001	0.0479354	-0.0830961	0.0613495	-0.069199
0.685	0.0187453	0.00540951	0.00966632	0.0167613	-0.0110045	-0.0531632	0.0406443	-0.0764099	0.0438651	-0.0720082
0.686	0.0191265	0.0101737	0.00973208	0.0140634	-0.0101731	-0.0494123	0.0318302	-0.0675276	0.0277084	-0.0758777
0.687	0.0196247	0.0152019	0.00976275	0.0118974	-0.0097616	-0.0446205	0.0219102	-0.0578689	0.0130367	-0.0805338
0.688	0.02018	0.0197022	0.00976592	0.0104071	-0.0098014	-0.0390005	0.0112563	-0.0481338	0.00022881	-0.085602
0.689	0.0206884	0.0231538	0.00981569	0.00976043	-0.0101846	-0.0328596	0.000246277	-0.0385172	-0.0101541	-0.0905548
0.69	0.0211368	0.0253186	0.0100438	0.00991831	-0.0106841	-0.0267324	-0.0106932	-0.0298136	-0.017859	-0.0947873
0.691	0.0215901	0.0261157	0.0105684	0.0105596	-0.0111813	-0.021306	-0.0210503	-0.0230523	-0.0229484	-0.0977289
0.692	0.0220529	0.025594	0.011382	0.011319	-0.0117129	-0.0170915	-0.0302249	-0.0186465	-0.0254242	-0.0988314
0.693	0.0224309	0.0238736	0.0124041	0.0119795	-0.012248	-0.0143139	-0.037693	-0.0167852	-0.0255234	-0.097715
0.694	0.0226175	0.0211532	0.0135772	0.0124608	-0.0126281	-0.0129304	-0.0431921	-0.0176975	-0.0242142	-0.0942886
0.695	0.0225885	0.017755	0.014871	0.012722	-0.0126776	-0.0126846	-0.0466097	-0.0208186	-0.0225681	-0.0884922
0.696	0.0224198	0.014002	0.0162231	0.0127501	-0.0122763	-0.0133739	-0.0478914	-0.0246507	-0.0209657	-0.0803303
0.697	0.0222521	0.0101604	0.0174837	0.0126392	-0.0113713	-0.0149477	-0.0471301	-0.0281644	-0.0194854	-0.0704464
0.698	0.022212	0.00648748	0.0183937	0.0125198	-0.00990878	-0.0173232	-0.0444429	-0.0315597	-0.018438	-0.0600688
0.699	0.022358	0.0031421	0.018712	0.0123691	-0.00786957	-0.0202155	-0.0398484	-0.0351424	-0.0181062	-0.0502321
0.7	0.0226854	0.000238409	0.0184346	0.012072	-0.00533889	-0.0231407	-0.0335321	-0.0385682	-0.0184815	-0.0414609
0.701	0.0230672	-0.00200366	0.0177604	0.0116826	-0.00250917	-0.0257211	-0.0260779	-0.0417543	-0.0193224	-0.0340645
0.702	0.0233165	-0.00340092	0.0168867	0.0114983	0.00023774	-0.0278383	-0.0182708	-0.0454534	-0.020145	-0.0283785
0.703	0.0234195	-0.00392259	0.0159543	0.0118609	0.0024837	-0.0293836	-0.0108159	-0.0503354	-0.0202025	-0.0246598
0.704	0.0235157	-0.00365456	0.0150494	0.0129033	0.00405858	-0.0302186	-0.00418418	-0.0561336	-0.0188228	-0.0228549
0.705	0.0236926	-0.00281794	0.0141944	0.0144623	0.00496645	-0.0304088	0.00140468	-0.0621341	-0.0159775	-0.0226863
0.706	0.0239449	-0.00174826	0.0134476	0.0161976	0.00522291	-0.0301787	0.00593718	-0.0679533	-0.0122877	-0.0239815
0.707	0.0242685	-0.000772571	0.012887	0.017757	0.00488493	-0.0295693	0.00960955	-0.0732063	-0.00840901	-0.0268091
0.708	0.024622	-7.48e-05	0.0124313	0.0188669	0.004104	-0.028365	0.012701	-0.0770486	-0.00459876	-0.0313137
0.709	0.0246795	0.000320016	0.0119045	0.0193795	0.00314561	-0.0264669	0.015448	-0.0789397	-0.000929039	-0.0374523
0.71	0.0237522	0.000489507	0.0112677	0.0192518	0.00239653	-0.0241482	0.0180217	-0.0793615	0.00224829	-0.0449354
0.711	0.0211111	0.000752378	0.0106225	0.0185205	0.00223265	-0.0218271	0.0204549	-0.0790909	0.00438794	-0.0532911
0.712	0.0165349	0.00181337	0.0101089	0.0173182	0.00286378	-0.0197952	0.022458	-0.0782088	0.00520884	-0.0619238
0.713	0.0105462	0.00427712	0.00988798	0.0158401	0.004361	-0.0182599	0.0233936	-0.0763223	0.00466846	-0.070401
0.714	0.0040917	0.00803082	0.010085	0.0142984	0.00671036	-0.0173335	0.0227458	-0.0732978	0.00262636	-0.0786528
0.715	-0.00175401	0.0123695	0.010724	0.0128577	0.00977941	-0.0169524	0.0205423	-0.0691477	-0.0010341	-0.0866142
0.716	-0.00599664	0.0164471	0.0117029	0.0115996	0.013252	-0.0169738	0.0171252	-0.0637314	-0.00599072	-0.0937025
0.717	-0.00808821	0.0196099	0.0127845	0.0105905	0.0166403	-0.0172079	0.0127457	-0.0573034	-0.01162	-0.0990036
0.718	-0.00804508	0.0215528	0.0137259	0.00985547	0.019481	-0.0173866	0.00766538	-0.0507353	-0.0174428	-0.102138
0.719	-0.00622009	0.0221811	0.0144246	0.00931792	0.0215356	-0.0172378	0.00230955	-0.0446691	-0.0229545	-0.1035
0.72	-0.00305393	0.0215111	0.0149239	0.00890811	0.0228056	-0.016583	-0.00300436	-0.0390137	-0.0272728	-0.103628
0.721	0.00102749	0.0196903	0.0152988	0.00863292	0.0234752	-0.0153331	-0.00814126	-0.0336524	-0.0295496	-0.102847
0.722	0.00557955	0.0169502	0.0154684	0.00855071	0.0237669	-0.013476	-0.0129857	-0.0290545	-0.0296003	-0.101415
0.723	0.0100786	0.0136753	0.0153244	0.00883456	0.023762	-0.011182	-0.0175032	-0.0256432	-0.0278214	-0.0997118
0.724	0.0139382	0.0103953	0.015025	0.00981234	0.02347	-0.00876066	-0.0217843	-0.0231124	-0.0248629	-0.0981263
0.725	0.0167104	0.0075687	0.0149441	0.0117675	0.022912	-0.00645384	-0.0258358	-0.0207703	-0.0215384	-0.0966687
0.726	0.0183239	0.00548059	0.0155007	0.0146258	0.022063	-0.00442821	-0.0292329	-0.0181449	-0.0187136	-0.0949252
0.727	0.0190257	0.00425747	0.0169368	0.0179418	0.0209538	-0.00276308	-0.0311496	-0.0151061	-0.0171463	-0.0925147
0.728	0.0191019	0.00388947	0.019152	0.0212626	0.0197614	-0.00135773	-0.0310284	-0.0117441	-0.0172285	-0.0894465
0.729	0.018765	0.00429782	0.0218035	0.0244133	0.0187111	-8.6e-05	-0.0289646	-0.0083466	-0.0187044	-0.0859851
0.73	0.0181585	0.00534128	0.0244593	0.0273764	0.0179943	0.0010672	-0.0252892	-0.00530905	-0.0208208	-0.0823086
0.731	0.0173685	0.00674258	0.0267721	0.0300364	0.0177216	0.00207322	-0.0202184	-0.00291538	-0.0226502	-0.0785115
0.732	0.0165503	0.00824024	0.0285977	0.0322187	0.0178761	0.00298352	-0.014018	-0.00124848	-0.0230639	-0.0747704
0.733	0.0159569	0.00985788	0.0298643	0.0337298	0.0183506	0.00385051	-0.00735803	-0.000237758	-0.0209264	-0.071218
0.734	0.015736	0.0118091	0.0304393	0.0342526	0.0190194	0.00445519	-0.00121744	0.000156612	-0.0155987	-0.0678746
0.735	0.0157957	0.0141433	0.0302952	0.0336471	0.0198217	0.00444024	0.0039028	-4.04e-05	-0.0072167	-0.0648116
0.736	0.0160143	0.0166074	0.02968	0.0322783	0.0208326	0.00376218	0.0080651	-0.000605706	0.00316084	-0.0623475
0.737	0.0164191	0.0188518	0.0288811	0.0307112	0.0221883	0.00276141	0.0112134	-0.00147967	0.01397	-0.0611893
0.738	0.0171339	0.0206645	0.0278766	0.0292801	0.02385	0.00180393	0.0134039	-0.00294163	0.0240513	-0.0619002
0.739	0.0183103	0.0220003	0.0264736	0.0280963	0.0253666	0.00103436	0.0152282	-0.00496427	0.0327815	-0.0640829
0.74	0.0199136	0.0228798	0.0246923	0.0273278	0.0260911	0.000488956	0.0171893	-0.00707091	0.039565	-0.0667899
0.741	0.0216533	0.0232662	0.022828	0.0272804	0.0257469	0.00025803	0.0192509	-0.00874101	0.0439869	-0.0695199
0.742	0.0232757	0.0230907	0.0212656	0.0281168	0.0245607	0.000441222	0.0213691	-0.00927093	0.0464078	-0.0721543
0.743	0.0247235	0.0224257	0.0201759	0.0296448	0.0229748	0.0010204	0.0238627	-0.00782959	0.0477538	-0.0744486
0.744	0.0259969	0.0215501	0.0194305	0.031434	0.0213338	0.00181204	0.026948	-0.00449545	0.0485353	-0.0760735
0.745	0.0270346	0.0208123	0.0189245	0.0330974	0.0197112	0.00251273	0.0303044	-0.000702334	0.0484985	-0.0768324
0.746	0.0277268	0.0204331	0.0186739	0.0345997	0.0180783	0.00286106	0.0334328	0.00195765	0.0474792	-0.0767679
0.747	0.0280122	0.0204831	0.0186474	0.0361267	0.0165472	0.00276473	0.0360999	0.00276171	0.045882	-0.0760854
0.748	0.0279694	0.0210996	0.0187952	0.0376352	0.0154028	0.00228851	0.0382813	0.00153091	0.0438638	-0.0748343
0.749	0.0278035	0.0224827	0.0191119	0.0389293	0.014852	0.00165462	0.0400122	-0.00192955	0.0408471	-0.0727332
0.75	0.0277326	0.0245927	0.0195533	0.0399629	0.0146684	0.00112804	0.0413507	-0.00781145	0.0362937	-0.0695262
0.751	0.0278137	0.0270583	0.0200098	0.0407742	0.0143132	0.000829031	0.0423934	-0.0159239	0.0304808	-0.0654849
0.752	0.0279883	0.029322	0.0204253	0.041343	0.0135016	0.000801525	0.0430675	-0.0256951	0.0243333	-0.0613517
0.753	0.0283268	0.0309402	0.0208212	0.0415453	0.0124836	0.00106248	0.0430431	-0.0365699	0.0187042	-0.0577956
0.754	0.02901	0.0317559	0.0211839	0.041127	0.0116726	0.00140246	0.0423356	-0.0480552	0.0140823	-0.0551185
0.755	0.0300648	0.0316935	0.0214653	0.0397878	0.0111133	0.00139241	0.0416561	-0.0595215	0.0108579	-0.0534502
0.756	0.0312792	0.0306924	0.021574	0.0374163	0.0105021	0.000714868	0.0417492	-0.0702674	0.00923202	-0.0528696
0.757	0.0323434	0.0288257	0.0213604	0.0341471	0.00957672	-0.000704492	0.0426724	-0.0798634	0.0089788	-0.0534149
0.758	0.032966	0.0261963	0.0208302	0.0301859	0.00832421	-0.0029163	0.0440496	-0.0882536	0.00980629	-0.055156
0.759	0.0329892	0.0228307	0.0201817	0.0257129	0.00692529	-0.00606631	0.0457908	-0.09521	0.0117672	-0.0579729
0.76	0.0324536	0.018924	0.0195292	0.0209264	0.00551718	-0.0101766	0.0482532	-0.100057	0.0151234	-0.0613108
0.761	0.0314205	0.0150241	0.0188385	0.0161148	0.00407759	-0.0149455	0.0518421	-0.102158	0.0199364	-0.0644463
0.762	0.0298843	0.0117225	0.0180571	0.0115354	0.00262856	-0.0197916	0.0566153	-0.101074	0.0257873	-0.0669823
0.763	0.028023	0.00935193	0.0170988	0.00727066	0.00134961	-0.0240836	0.0623038	-0.0964673	0.0316531	-0.0688624
0.764	0.0261993	0.0079636	0.0158272	0.00339517	0.000420521	-0.0275528	0.0685094	-0.0883699	0.0361796	-0.0700351
0.765	0.0246469	0.00737372	0.0141456	6.35e-05	-3.7e-05	-0.0303934	0.0746845	-0.0773617	0.0385815	-0.0704634
0.766	0.0234638	0.00729825	0.012078	-0.00266398	1.48e-05	-0.0328308	0.0801774	-0.0644432	0.039185	-0.070377
0.767	0.0227132	0.00751847	0.00983719	-0.00481401	0.000426294	-0.034802	0.0844987	-0.0508292	0.0387463	-0.0702057
0.768	0.0223506	0.0079912	0.00775545	-0.00646939	0.000993512	-0.0360616	0.0874495	-0.0379817	0.0374901	-0.0700533
0.769	0.0222718	0.00873708	0.00610296	-0.00784278	0.00158482	-0.0364387	0.0890034	-0.0273861	0.0351138	-0.069485
0.77	0.0224105	0.00962804	0.00502236	-0.00912735	0.00202091	-0.035912	0.0892063	-0.0198084	0.0315112	-0.0681724
0.771	0.0227583	0.0104376	0.00462983	-0.0103637	0.00208428	-0.0345192	0.0880642	-0.0150778	0.0270446	-0.0664189
0.772	0.0233147	0.0109894	0.00498107	-0.0115662	0.0016489	-0.0323815	0.0854228	-0.0127075	0.0220859	-0.0648511
0.773	0.0239501	0.0112191	0.00589763	-0.0128335	0.000677034	-0.0298093	0.0811567	-0.0123342	0.0167302	-0.0639102
0.774	0.0244556	0.0111636	0.00707264	-0.0142279	-0.000727009	-0.027193	0.075447	-0.0135224	0.0110765	-0.0637162
0.775	0.0247407	0.0109377	0.00828814	-0.0156189	-0.002284	-0.0248846	0.0686875	-0.0157064	0.00546313	-0.064259
0.776	0.0248207	0.010723	0.00947943	-0.0167609	-0.00379235	-0.0232125	0.0612198	-0.0185258	0.000482904	-0.065584
0.777	0.024704	0.0106086	0.0107539	-0.0174642	-0.00519022	-0.0223414	0.0533244	-0.0216785	-0.00279871	-0.0676971
0.778	0.0244315	0.0105128	0.0123014	-0.0177	-0.00631273	-0.0221715	0.0453729	-0.0244501	-0.00282679	-0.0702543
0.779	0.0241372	0.0104029	0.0141614	-0.0175366	-0.0069614	-0.0223855	0.0379024	-0.0261448	0.00143792	-0.072455
0.78	0.0239097	0.0103251	0.0161035	-0.0168387	-0.00713855	-0.0226029	0.0314846	-0.0267603	0.00938717	-0.0735453
0.781	0.0236851	0.0102313	0.0177717	-0.0151723	-0.00696391	-0.0227153	0.0263417	-0.0266371	0.0191487	-0.0733666
0.782	0.0233716	0.0100927	0.0189528	-0.012077	-0.0064899	-0.0228688	0.0222219	-0.0258521	0.0289788	-0.0721648
0.783	0.0229249	0.0100401	0.0196934	-0.00745753	-0.00570346	-0.0230912	0.0187347	-0.0242656	0.0379378	-0.0702218
0.784	0.0223273	0.010247	0.020127	-0.00175311	-0.00462106	-0.0232425	0.0155091	-0.0218742	0.0454316	-0.0678178
0.785	0.0216668	0.0108694	0.0203374	0.00448348	-0.00334598	-0.023129	0.0121621	-0.0189472	0.050736	-0.0653045
0.786	0.0211354	0.0119788	0.0204241	0.0109153	-0.00197396	-0.0226157	0.00841755	-0.0158822	0.0535049	-0.0630972
0.787	0.0207972	0.0133449	0.0204805	0.0171803	-0.000442042	-0.0217407	0.00411401	-0.0130509	0.0543005	-0.0612867
0.788	0.0205537	0.0145091	0.0205663	0.0229076	0.00134804	-0.0205345	-0.000832866	-0.0107956	0.053843	-0.0594147
0.789	0.0203894	0.0151909	0.0207887	0.0279466	0.00319874	-0.0188495	-0.00628502	-0.00933251	0.0522781	-0.0570087
0.79	0.0203264	0.0154009	0.0212144	0.0322635	0.00458833	-0.0165078	-0.0119006	-0.00846358	0.0496915	-0.0540779
0.791	0.0203235	0.0151776	0.0217529	0.0359481	0.00512885	-0.0135389	-0.017364	-0.00750667	0.0464483	-0.0508619
0.792	0.0204468	0.0144908	0.022262	0.0392511	0.0049521	-0.0102339	-0.0225008	-0.00584487	0.0427073	-0.0472688
0.793	0.0207706	0.0133177	0.0226914	0.0422032	0.00452436	-0.00695818	-0.0272944	-0.00360471	0.0382229	-0.0429298
0.794	0.0211154	0.0116874	0.0231517	0.0444194	0.00428886	-0.00401137	-0.031734	-0.00137846	0.0327438	-0.0378388
0.795	0.0211495	0.0098143	0.0238125	0.0455025	0.00456435	-0.00162119	-0.0356331	0.000583437	0.026438	-0.0325478
0.796	0.0206121	0.00815837	0.024681	0.0454576	0.00546732	3.72e-06	-0.0388453	0.00237419	0.0198224	-0.0277402
0.797	0.0194576	0.00720595	0.0255948	0.0446249	0.00680656	0.000625843	-0.0415397	0.00391049	0.0133008	-0.0238
0.798	0.0179562	0.00713942	0.0263811	0.0434219	0.00822061	8.82e-05	-0.0439762	0.00500268	0.00700111	-0.0206588
0.799	0.0165586	0.00772379	0.0269876	0.0422997	0.00945214	-0.00155357	-0.0462158	0.00577639	0.00122594	-0.0181713
0.8	0.0156337	0.00855181	0.0274667	0.0417204	0.0104009	-0.00399793	-0.0483359	0.00647114	-0.00323573	-0.0165731
0.801	0.0153466	0.00938801	0.0277933	0.0419696	0.0110112	-0.00683103	-0.0506104	0.00702061	-0.00586781	-0.0161431
0.802	0.0156725	0.0102527	0.0278969	0.042975	0.0112295	-0.00975888	-0.0532923	0.00716005	-0.00724593	-0.0168454
0.803	0.0164307	0.0112511	0.027823	0.044388	0.0110603	-0.0126146	-0.0563735	0.00657911	-0.00838571	-0.0186801
0.804	0.0173568	0.0123978	0.0276289	0.0460096	0.0106544	-0.015238	-0.0596429	0.0049537	-0.00960062	-0.0217327
0.805	0.0182807	0.0135877	0.0272697	0.0479115	0.0102997	-0.0174074	-0.0630978	0.00216431	-0.0104654	-0.0256957
0.806	0.0191942	0.0146354	0.0267005	0.0499985	0.0103019	-0.0188828	-0.0669378	-0.00158676	-0.0106072	-0.0299398
0.807	0.0200991	0.0153485	0.0259609	0.0519325	0.01089	-0.0195995	-0.070977	-0.00599004	-0.0101953	-0.0341451
0.808	0.0208878	0.0157566	0.0251751	0.0535387	0.0121782	-0.0197749	-0.0745639	-0.0108607	-0.00963633	-0.0384149
0.809	0.0214266	0.0160475	0.0245257	0.0548015	0.0140883	-0.0197338	-0.0770933	-0.0161201	-0.00917955	-0.0427368
0.81	0.0216914	0.0161712	0.0241141	0.0556481	0.0163506	-0.0196424	-0.0783162	-0.0217922	-0.00900237	-0.0468717
0.811	0.0217336	0.0160176	0.0238276	0.0561208	0.0186889	-0.0198785	-0.0782624	-0.0279129	-0.00926529	-0.0507914
0.812	0.0215944	0.0158865	0.0234262	0.0563994	0.0209504	-0.0215572	-0.0771472	-0.0342843	-0.0100031	-0.0546664
0.813	0.0213644	0.0163176	0.0227665	0.0564482	0.0230158	-0.0255922	-0.0753498	-0.0406637	-0.0111531	-0.0584815
0.814	0.021183	0.0175753	0.0218665	0.0559602	0.0246558	-0.03125	-0.0731837	-0.0468728	-0.0125776	-0.062056
0.815	0.0210852	0.0194527	0.0208408	0.0547785	0.0255539	-0.0363024	-0.0707567	-0.0524373	-0.0141555	-0.0653244
0.816	0.0210326	0.0213473	0.0198353	0.0531324	0.025414	-0.038369	-0.0682434	-0.0565198	-0.0159718	-0.0682764
0.817	0.0210738	0.0226115	0.0189262	0.0513147	0.0240924	-0.0358694	-0.065925	-0.0581303	-0.0181748	-0.0707221
0.818	0.0212467	0.0230452	0.0181879	0.0494063	0.0217174	-0.0281748	-0.0637531	-0.0566536	-0.0207659	-0.072402
0.819	0.0215057	0.0228468	0.0177279	0.0472926	0.0185912	-0.0155596	-0.0614337	-0.0527188	-0.0237112	-0.0732904
0.82	0.021864	0.0222559	0.017536	0.0447012	0.0149747	0.000830036	-0.0590574	-0.0479693	-0.0269834	-0.0736924
0.821	0.0225139	0.0214335	0.0175529	0.0415119	0.0110825	0.0192112	-0.057075	-0.0435289	-0.0304004	-0.0739925
0.822	0.0238467	0.0204748	0.0178182	0.0380187	0.00726718	0.0375418	-0.0557191	-0.0394883	-0.0337183	-0.0743063
0.823	0.0261211	0.0194194	0.0184093	0.0345659	0.0040048	0.053889	-0.0548205	-0.0360684	-0.0370355	-0.0745974
0.824	0.0291363	0.0182189	0.0193431	0.0312346	0.0015498	0.0667469	-0.0540454	-0.0341837	-0.0408335	-0.0751234
0.825	0.0324461	0.0168542	0.020568	0.0280805	-0.000102982	0.0751213	-0.053173	-0.0346411	-0.045437	-0.0763321
0.826	0.0355855	0.0154798	0.0220038	0.0253377	-0.000930102	0.0783651	-0.0522633	-0.0375806	-0.0505746	-0.0782454
0.827	0.0380582	0.0142146	0.0234684	0.0232385	-0.00105182	0.0762152	-0.0516365	-0.0426112	-0.0555341	-0.0804591
0.828	0.0393999	0.0129704	0.024698	0.0218205	-0.000897604	0.0690721	-0.051587	-0.0489859	-0.059543	-0.0828764
0.829	0.0393188	0.0116969	0.0255185	0.0210077	-0.000862271	0.0581353	-0.0520176	-0.0559342	-0.0618967	-0.0858868
0.83	0.0383222	0.0106185	0.025803	0.0207341	-0.00111115	0.0451255	-0.052547	-0.0630328	-0.0620603	-0.0896807
0.831	0.0382923	0.0101855	0.0255315	0.0209349	-0.00171766	0.0315946	-0.053006	-0.0699714	-0.059963	-0.0938076
0.832	0.0411164	0.0108673	0.0248963	0.0215257	-0.00273984	0.0184941	-0.0534694	-0.0761463	-0.0559022	-0.0974665
0.833	0.0468279	0.0128285	0.0240781	0.0223619	-0.0041362	0.0064464	-0.053866	-0.0807496	-0.0499813	-0.100091
0.834	0.0539444	0.0157211	0.0232021	0.0232847	-0.00575757	-0.003991	-0.0539991	-0.0831278	-0.0421818	-0.101466
0.835	0.0608059	0.0189678	0.0225364	0.0242725	-0.00746771	-0.0125927	-0.0538886	-0.0829084	-0.0328616	-0.101126
0.836	0.0661793	0.0221607	0.0223882	0.0253892	-0.009209	-0.0194602	-0.0536766	-0.0796984	-0.0224844	-0.0982358
0.837	0.0693035	0.0250419	0.0228101	0.026607	-0.0109985	-0.0245412	-0.0532726	-0.0730573	-0.0113145	-0.0923476
0.838	0.0698012	0.0274122	0.0235294	0.0277291	-0.0127936	-0.0276244	-0.0524755	-0.0632343	1.97e-05	-0.083753
0.839	0.067637	0.0291317	0.0242223	0.0282942	-0.0142634	-0.0286622	-0.0513124	-0.0514321	0.0102973	-0.0733079
0.84	0.0631936	0.0300632	0.024863	0.0276426	-0.014902	-0.0278036	-0.049937	-0.0388274	0.0186028	-0.062454
0.841	0.0571403	0.030122	0.0256365	0.0254066	-0.0144894	-0.0253662	-0.0483399	-0.0260259	0.0249359	-0.0528375
0.842	0.0501094	0.0293721	0.0266128	0.0218259	-0.0132222	-0.0218771	-0.0464283	-0.0137395	0.0296075	-0.0452241
0.843	0.0426655	0.028022	0.0276907	0.01744	-0.0113904	-0.0180166	-0.0442097	-0.00297983	0.0325922	-0.0393004
0.844	0.0354518	0.0263538	0.0287406	0.0127609	-0.00922231	-0.0144635	-0.041626	0.00550522	0.0337393	-0.0345579
0.845	0.0290835	0.0245992	0.0297026	0.00826453	-0.00690198	-0.0117676	-0.038364	0.0112613	0.0331566	-0.0305735
0.846	0.0238623	0.0228748	0.0305528	0.00443868	-0.00456464	-0.0102163	-0.0341176	0.0140965	0.0311146	-0.026935
0.847	0.0197751	0.021212	0.0312295	0.00170742	-0.00253076	-0.00971139	-0.0289589	0.0144657	0.0279278	-0.0235421
0.848	0.0167678	0.0195839	0.0316376	0.000241711	-0.00124661	-0.00996786	-0.0231725	0.0132595	0.0240875	-0.0204534
0.849	0.0148761	0.0179761	0.0317381	-2.26e-05	-0.000797132	-0.0107993	-0.0168774	0.0111664	0.0202391	-0.0173984
0.85	0.0140715	0.0164782	0.0315683	0.000768961	-0.000852222	-0.0120615	-0.0101374	0.00861728	0.016831	-0.0139746
0.851	0.0140965	0.0152687	0.031092	0.0023043	-0.00103772	-0.0134795	-0.00334304	0.00610614	0.013804	-0.0102482
0.852	0.0146096	0.0144647	0.0301876	0.00414867	-0.00108465	-0.0146651	0.00283405	0.00415929	0.0109055	-0.00666237
0.853	0.0154212	0.0139967	0.0288688	0.00605646	-0.000671824	-0.015334	0.00779184	0.0029963	0.00806552	-0.0033693
0.854	0.0164307	0.0137378	0.027366	0.00804359	0.00043304	-0.0153893	0.0110637	0.00263687	0.00524959	-0.00014722
0.855	0.0174494	0.0136796	0.0259502	0.0102131	0.00202787	-0.0147574	0.0123351	0.00317239	0.00255675	0.00322659
0.856	0.0182452	0.0138657	0.0248492	0.0126558	0.00369167	-0.0134512	0.0116268	0.004548	0.000428882	0.0068827
0.857	0.0186616	0.0143117	0.0243817	0.0153708	0.0051858	-0.0117277	0.00937377	0.00658936	-0.000608158	0.0109192
0.858	0.0186349	0.0149766	0.0249379	0.0181582	0.0064195	-0.00983481	0.00621173	0.00930663	-0.000364352	0.015391
0.859	0.0181841	0.0157127	0.0266965	0.0206675	0.00728085	-0.00780866	0.00276344	0.0129425	0.000843109	0.0201207
0.86	0.0173721	0.016363	0.0294315	0.0225328	0.00763342	-0.00571863	-0.000266471	0.0177797	0.00244757	0.0246148
0.861	0.0163073	0.0169067	0.0326209	0.0234884	0.00746874	-0.00381749	-0.00224554	0.0237465	0.00397559	0.0284274
0.862	0.0152058	0.0174013	0.0357484	0.0235451	0.0070626	-0.00240232	-0.00299577	0.0303957	0.00524983	0.0316055
0.863	0.0142575	0.0178574	0.0384898	0.0230944	0.00691015	-0.00167604	-0.0026261	0.0371807	0.00647965	0.0346028
0.864	0.0135019	0.0182978	0.0406723	0.0227631	0.00741403	-0.00168169	-0.00111771	0.0436274	0.008053	0.0377194
0.865	0.0129663	0.0188295	0.0422286	0.0229724	0.00864401	-0.00232859	0.00153925	0.0494833	0.0100418	0.0410781
0.866	0.0126702	0.0196107	0.0431121	0.0236432	0.0103668	-0.00346707	0.00496005	0.0545098	0.011858	0.0451025
0.867	0.0125137	0.021065	0.0431467	0.024534	0.0121416	-0.00496543	0.00849558	0.058217	0.01259	0.0502415
0.868	0.0123692	0.0239839	0.0420977	0.0255251	0.0134196	-0.00675529	0.0115701	0.0601815	0.0117751	0.0564936
0.869	0.0122557	0.0287115	0.0400031	0.0264719	0.0137138	-0.008749	0.01375	0.0605371	0.00964546	0.0636373
0.87	0.0123588	0.0345055	0.0372868	0.0271412	0.0128795	-0.0106859	0.0147416	0.0598406	0.00655856	0.0713276
0.871	0.0127235	0.0401647	0.0344503	0.0272315	0.0112035	-0.0121501	0.01443	0.0586016	0.00264683	0.0789151
0.872	0.0131124	0.0447375	0.0318351	0.0265254	0.0090052	-0.0127987	0.0130402	0.0571303	-0.00178419	0.0855894
0.873	0.0132796	0.0475735	0.0296131	0.0250603	0.00646899	-0.0125182	0.0109914	0.0554394	-0.00596722	0.0907878
0.874	0.0130244	0.0482735	0.0278889	0.0229595	0.00392652	-0.0113875	0.00848412	0.0533385	-0.00910551	0.0944445
0.875	0.01224	0.0466825	0.0268574	0.0203451	0.00181711	-0.00972224	0.00570077	0.0508009	-0.0111054	0.0968322
0.876	0.0110737	0.0428644	0.0267337	0.01739	0.000394585	-0.00805207	0.00303948	0.0480149	-0.0124006	0.0984147
0.877	0.00974873	0.0371498	0.0275495	0.0141713	-0.000343135	-0.0064767	0.000779515	0.0451603	-0.0129695	0.0999315
0.878	0.0083991	0.0302353	0.0290581	0.0106593	-0.000616363	-0.00435663	-0.00113532	0.0421646	-0.0122723	0.10223
0.879	0.00706795	0.0231056	0.030819	0.00691863	-0.000701977	-0.00117512	-0.00297334	0.0387749	-0.0100756	0.105675
0.88	0.00574754	0.0165342	0.0325377	0.00311952	-0.000737372	0.00287118	-0.00502228	0.0350289	-0.00677806	0.10993
0.881	0.00451092	0.0107624	0.0341599	-0.000543986	-0.00083114	0.00730111	-0.00733715	0.0312994	-0.00319301	0.114438
0.882	0.00353616	0.00587453	0.0355842	-0.00374325	-0.00123778	0.0118002	-0.00957708	0.0277326	-0.000251776	0.11886
0.883	0.00295332	0.00204985	0.0365214	-0.0060149	-0.00226263	0.0160986	-0.0112456	0.0240088	0.00136563	0.123081
0.884	0.00271105	-0.000626525	0.0366177	-0.00698907	-0.00405706	0.0197217	-0.0120617	0.0197815	0.00146789	0.126912
0.885	0.00266053	-0.00221682	0.0357518	-0.00654374	-0.0065415	0.0221581	-0.0121304	0.0151059	0.0001809	0.129829
0.886	0.00281602	-0.00290429	0.0341049	-0.00485624	-0.00941592	0.0230804	-0.012035	0.0102244	-0.00221863	0.131225
0.887	0.00346391	-0.00301404	0.0319613	-0.00239737	-0.0123276	0.0223088	-0.0125424	0.00516349	-0.0050751	0.130766
0.888	0.00492253	-0.00286822	0.0296477	0.000203584	-0.0149869	0.0198315	-0.0138936	-0.000202044	-0.00743927	0.128466
0.889	0.0073031	-0.00260961	0.0274443	0.00248431	-0.0170421	0.0158556	-0.0157063	-0.00597634	-0.00876593	0.124542
0.89	0.0108361	-0.00221723	0.0254108	0.00442542	-0.0181775	0.0107339	-0.0176654	-0.0121772	-0.00922852	0.119284
0.891	0.0165255	-0.00155935	0.0234334	0.00623522	-0.0182304	0.00483124	-0.0199075	-0.018528	-0.00917276	0.11303
0.892	0.0260634	-0.000480329	0.0214491	0.00786365	-0.017078	-0.00150471	-0.0226438	-0.024437	-0.00844025	0.105966
0.893	0.0404556	0.00101349	0.0195822	0.00894586	-0.0146485	-0.00794643	-0.0257202	-0.0293791	-0.00637184	0.0979863
0.894	0.0585956	0.00279126	0.0181108	0.00920336	-0.0110805	-0.0142299	-0.0287417	-0.0332163	-0.00236119	0.0890061
0.895	0.0775514	0.00479986	0.0173485	0.00871868	-0.00686474	-0.0199573	-0.0314615	-0.0361675	0.00382908	0.0793531
0.896	0.0940981	0.00702565	0.0175095	0.00779471	-0.00263216	-0.0245233	-0.0338993	-0.0385665	0.0119212	0.0696121
0.897	0.105885	0.00941371	0.0185539	0.00669539	0.00132153	-0.0274753	-0.0360988	-0.040558	0.0208211	0.0601881
0.898	0.111856	0.0119831	0.0202028	0.00559553	0.00503228	-0.0286481	-0.0378354	-0.0419175	0.0287714	0.0513467
0.899	0.112081	0.0148225	0.0221436	0.00461739	0.00840684	-0.0280185	-0.0386574	-0.0421769	0.0340531	0.0432856
0.9	0.107236	0.0179247	0.0240924	0.00390246	0.0109492	-0.0258502	-0.0382624	-0.04103	0.0354093	0.0357523
0.901	0.0982955	0.0211343	0.0258188	0.00369541	0.0119685	-0.0227518	-0.0368327	-0.0388328	0.031912	0.0281216
0.902	0.0864754	0.0242059	0.0272234	0.00422522	0.011065	-0.0193549	-0.0348519	-0.0365985	0.0228428	0.0199776
0.903	0.0731139	0.0269415	0.028275	0.00559073	0.00843875	-0.0161073	-0.0326201	-0.035237	0.00804226	0.0113202
0.904	0.0594887	0.0293099	0.0289139	0.00779253	0.00469624	-0.0132655	-0.0301056	-0.034932	-0.0116506	0.00237479
0.905	0.0466459	0.0313077	0.0290605	0.0107558	0.000238571	-0.0109845	-0.0271553	-0.0353655	-0.0345553	-0.00652922
0.906	0.035279	0.0327851	0.0287907	0.014369	-0.00494566	-0.00946435	-0.023863	-0.0363546	-0.0586289	-0.0150047
0.907	0.0257919	0.0335618	0.0285361	0.0185048	-0.0108253	-0.00880704	-0.0207037	-0.0378371	-0.0817625	-0.0227697
0.908	0.018514	0.0335925	0.0288438	0.0229735	-0.0170098	-0.00871833	-0.0180408	-0.0393283	-0.102088	-0.0298225
0.909	0.0136428	0.0330416	0.0299073	0.0274554	-0.0229036	-0.00868278	-0.0156344	-0.0401098	-0.118224	-0.0363642
0.91	0.011072	0.0323275	0.031548	0.0316232	-0.0279264	-0.00839027	-0.01292	-0.0397996	-0.129296	-0.0424079
0.911	0.0105312	0.0319073	0.0334885	0.0353774	-0.0314602	-0.00779105	-0.00955041	-0.0382859	-0.134916	-0.0475961
0.912	0.011638	0.0318835	0.0354514	0.0387633	-0.0328962	-0.00697666	-0.00542247	-0.0355181	-0.135137	-0.0514342
0.913	0.013771	0.0319993	0.0371743	0.0417686	-0.0320565	-0.00620244	-0.000402254	-0.0316179	-0.130349	-0.0534939
0.914	0.0162163	0.0320448	0.0384952	0.0443203	-0.0292871	-0.00581618	0.00573618	-0.0269224	-0.121065	-0.0535656
0.915	0.0184508	0.0320793	0.0393623	0.0463264	-0.0250856	-0.00617373	0.0131191	-0.0217939	-0.107866	-0.0517487
0.916	0.0201951	0.0322531	0.0397341	0.0476946	-0.0200696	-0.00761803	0.0216113	-0.0165544	-0.0916708	-0.0481786
0.917	0.0213113	0.0326346	0.0395281	0.0484043	-0.0151006	-0.0102254	0.0307391	-0.0119068	-0.0738795	-0.0428257
0.918	0.0217996	0.0332009	0.0387207	0.0485353	-0.0109081	-0.0135903	0.0398423	-0.00895826	-0.056105	-0.0358981
0.919	0.0217777	0.0337803	0.0374985	0.0481755	-0.00774357	-0.0169071	0.0485393	-0.00824791	-0.0396745	-0.0282453
0.92	0.0213407	0.0340592	0.0362446	0.0474721	-0.00564989	-0.0192851	0.0568935	-0.00941193	-0.0253608	-0.020967
0.921	0.0205091	0.0337904	0.035281	0.0467135	-0.00476075	-0.0201892	0.0650644	-0.0120029	-0.0135074	-0.0148186
0.922	0.019252	0.033	0.0346737	0.0461707	-0.005168	-0.019645	0.0729389	-0.0158294	-0.00422535	-0.0103398
0.923	0.0174843	0.0319345	0.0343574	0.0458568	-0.00669571	-0.0180219	0.0802221	-0.0206156	0.00251695	-0.00815437
0.924	0.0150711	0.0308128	0.0342728	0.0454119	-0.00886076	-0.0157732	0.0867008	-0.0259301	0.00704794	-0.00866815
0.925	0.0119287	0.0297662	0.0343886	0.0444362	-0.0110964	-0.013417	0.0921572	-0.0314079	0.0100935	-0.0115329
0.926	0.00818348	0.028927	0.0347103	0.0429403	-0.0130214	-0.0115084	0.0962579	-0.0367428	0.0123652	-0.0156005
0.927	0.00408942	0.028405	0.0351795	0.0411676	-0.0144411	-0.0105297	0.0986842	-0.0413498	0.0140753	-0.0194791
0.928	-0.000235241	0.0282242	0.0356424	0.0392374	-0.0151948	-0.0107016	0.0992401	-0.0444107	0.0150814	-0.0219467
0.929	-0.00481407	0.0283187	0.0359515	0.0372606	-0.0151292	-0.0119083	0.0978503	-0.0454539	0.0155119	-0.0219357
0.93	-0.00954871	0.0286806	0.0360201	0.0354926	-0.0141747	-0.0139431	0.0947064	-0.0446166	0.0159386	-0.0187364
0.931	-0.0140973	0.0295197	0.0358844	0.0342	-0.0123995	-0.0167364	0.0903193	-0.0422521	0.0167486	-0.0123494
0.932	-0.0179797	0.0310928	0.0357198	0.0335571	-0.0100175	-0.0203206	0.0851602	-0.0384619	0.0177008	-0.00329744
0.933	-0.0207335	0.0334381	0.0357199	0.0335655	-0.00729059	-0.0246082	0.0795038	-0.0332073	0.0185039	0.00781957
0.934	-0.0221529	0.0363397	0.0360798	0.033983	-0.00446039	-0.0293102	0.0736319	-0.0268091	0.0193477	0.020294
0.935	-0.022423	0.0394041	0.0370199	0.0344535	-0.00177568	-0.0340823	0.0678079	-0.0199729	0.0204115	0.0331259
0.936	-0.0219019	0.0422143	0.0385503	0.0346624	0.000525782	-0.03861	0.0620272	-0.0133177	0.0215076	0.0453117
0.937	-0.0208359	0.0444845	0.0403766	0.0344652	0.0023158	-0.042632	0.0560576	-0.00722507	0.0224323	0.056078
0.938	-0.0194063	0.0460678	0.0421675	0.0339589	0.00365327	-0.0459322	0.0497841	-0.00199318	0.0232489	0.0647001
0.939	-0.0179062	0.0469014	0.0436402	0.0332412	0.00466601	-0.0483501	0.0433026	0.00204062	0.0242561	0.0705233
0.94	-0.0166133	0.046982	0.0446045	0.0322613	0.00543491	-0.0496048	0.0368793	0.00454695	0.0257154	0.07315
0.941	-0.0155779	0.0463556	0.045146	0.0310099	0.00602544	-0.0489875	0.0309483	0.00552049	0.0274899	0.0725871
0.942	-0.0146681	0.0451346	0.0454284	0.029614	0.00651972	-0.0459672	0.0259002	0.00528643	0.0291429	0.0693367
0.943	-0.013674	0.0434648	0.0454121	0.0283147	0.00703679	-0.0409541	0.0220298	0.00411218	0.0305195	0.0640852
0.944	-0.0122858	0.0414605	0.0449211	0.0273279	0.00769509	-0.0348615	0.0195612	0.00214258	0.0318751	0.0575448
0.945	-0.0101507	0.0392334	0.0438336	0.0266787	0.0085344	-0.0285618	0.0185929	-0.000277955	0.033254	0.0506712
0.946	-0.00707243	0.0369687	0.0422459	0.0262948	0.00956526	-0.0228188	0.0192227	-0.00243206	0.0341022	0.0443873
0.947	-0.00305636	0.0351034	0.0404205	0.0261516	0.0109393	-0.018215	0.0214387	-0.0036397	0.0337335	0.0390881
0.948	0.00180058	0.0344685	0.0386046	0.0262731	0.012862	-0.0151725	0.0249659	-0.00383432	0.0318706	0.0345604
0.949	0.00732426	0.0358719	0.0369597	0.0266004	0.0152653	-0.0139751	0.0294176	-0.00331932	0.0284813	0.0303705
0.95	0.0132225	0.0393514	0.0355533	0.0269194	0.0178224	-0.0147192	0.0342792	-0.00220124	0.0235742	0.0264388
0.951	0.019138	0.0441344	0.0344035	0.0270578	0.0202538	-0.0172951	0.0388762	-0.000477853	0.0174909	0.0229936
0.952	0.0248037	0.0492538	0.0335415	0.0270377	0.0224117	-0.0214562	0.0425131	0.00180063	0.0110081	0.0201079
0.953	0.0300981	0.0538539	0.0330315	0.026911	0.024223	-0.0268975	0.0446471	0.00465706	0.00479479	0.0176384
0.954	0.0349171	0.0572209	0.0329754	0.026671	0.0256571	-0.033136	0.045109	0.00809608	-0.00101756	0.0153957
0.955	0.0391206	0.0589268	0.033449	0.0263755	0.0265714	-0.039452	0.0440348	0.0120431	-0.00654412	0.0132596
0.956	0.0425201	0.0588284	0.0343619	0.0261029	0.0266101	-0.0451766	0.0415404	0.0165164	-0.0119892	0.0111795
0.957	0.0448858	0.0569511	0.035512	0.0257947	0.025476	-0.049971	0.0376932	0.0215354	-0.0178631	0.00898786
0.958	0.0461359	0.0534699	0.0367589	0.0252767	0.02321	-0.0536986	0.0327302	0.0269282	-0.0246421	0.00635889
0.959	0.0463814	0.048638	0.0380008	0.0244337	0.0200021	-0.0561744	0.0271614	0.0323502	-0.0323116	0.00297321
0.96	0.0457519	0.0427664	0.039063	0.0233564	0.0160108	-0.0572339	0.021694	0.0372594	-0.0406139	-0.00135428
0.961	0.0443605	0.0362966	0.0396712	0.0222271	0.0115517	-0.056945	0.0170168	0.0408689	-0.0493223	-0.00639879
0.962	0.0423652	0.0296942	0.039627	0.0211687	0.00714745	-0.0557095	0.0136717	0.0424376	-0.0580561	-0.011421
0.963	0.0399963	0.0233559	0.0390023	0.0204239	0.00323373	-0.0541336	0.0119485	0.0418028	-0.0662035	-0.015733
0.964	0.0375296	0.0176925	0.0380019	0.0203333	1.52e-05	-0.052663	0.011675	0.0394258	-0.073248	-0.0190682
0.965	0.0352008	0.0130738	0.0367534	0.0210399	-0.00235546	-0.0514143	0.0124413	0.0359677	-0.0790552	-0.0212134
0.966	0.0332111	0.00975522	0.0352466	0.022544	-0.00387492	-0.0503159	0.0140559	0.0322312	-0.0837924	-0.0218039
0.967	0.0317863	0.00795141	0.0333577	0.0248621	-0.00495684	-0.0491576	0.0163981	0.029255	-0.0877715	-0.0205095
0.968	0.031103	0.00767709	0.0310494	0.0279504	-0.00607305	-0.04753	0.0191147	0.0279571	-0.091493	-0.0172943
0.969	0.0311602	0.00857042	0.028438	0.0315399	-0.00708228	-0.044962	0.0217826	0.0288328	-0.0954267	-0.0127091
0.97	0.0317747	0.0101648	0.0256978	0.0351631	-0.00731701	-0.0412267	0.0241173	0.0320576	-0.0995143	-0.00761866
0.971	0.0327082	0.0121764	0.0231907	0.0384313	-0.00642134	-0.0364992	0.0258184	0.0373704	-0.103196	-0.00248072
0.972	0.0337691	0.0144363	0.0214461	0.0411389	-0.00467811	-0.0313004	0.0263323	0.0437403	-0.105788	0.00275274
0.973	0.0348064	0.0167615	0.0208421	0.0430641	-0.00242201	-0.0262024	0.0251066	0.0496934	-0.106726	0.00832013
0.974	0.0356229	0.0189621	0.0213996	0.0439243	0.000357577	-0.0215883	0.0220806	0.0539244	-0.105812	0.0144696
0.975	0.0360026	0.0209142	0.0228162	0.0436412	0.00370113	-0.0179548	0.017775	0.0554778	-0.103372	0.0211417
0.976	0.035925	0.0226765	0.0247306	0.0424665	0.00742126	-0.0160131	0.012872	0.0538745	-0.099995	0.0278174
0.977	0.0355312	0.0244239	0.02695	0.0407704	0.0112443	-0.0161356	0.00774415	0.049138	-0.0961461	0.0339178
0.978	0.0348816	0.0262219	0.0294008	0.038852	0.0149296	-0.0181842	0.00259492	0.0417166	-0.0920857	0.0390633
0.979	0.0339877	0.0281196	0.0319709	0.036967	0.0182748	-0.0217744	-0.00213103	0.0323868	-0.0878979	0.0428771
0.98	0.0329205	0.0302519	0.034403	0.0353719	0.0211367	-0.0263295	-0.00587874	0.0219871	-0.0838264	0.0451017
0.981	0.031821	0.0326797	0.0364264	0.0342972	0.023512	-0.0311739	-0.00837207	0.0114119	-0.0806263	0.0458037
0.982	0.0308829	0.0353097	0.0380604	0.0339087	0.0255717	-0.0356272	-0.00966026	0.00173449	-0.0790103	0.0450892
0.983	0.0302866	0.0378231	0.0395808	0.0342261	0.0275678	-0.0389665	-0.00983936	-0.00599781	-0.0789085	0.0428639
0.984	0.0301773	0.0397898	0.0411108	0.0350871	0.0296299	-0.0406659	-0.00887687	-0.0111703	-0.0796204	0.0389934
0.985	0.0306318	0.0410462	0.0423913	0.0362642	0.0316226	-0.0406639	-0.00691326	-0.0137882	-0.0803073	0.0336216
0.986	0.0316191	0.0417155	0.0429596	0.0374556	0.0333705	-0.0392388	-0.00446957	-0.0142671	-0.0802816	0.0270485
0.987	0.0330356	0.0419015	0.0425453	0.0382645	0.0348909	-0.036789	-0.00215486	-0.013146	-0.0792261	0.0194603
0.988	0.0347167	0.0415536	0.0413202	0.0384275	0.036181	-0.0336404	-0.000455009	-0.010968	-0.077006	0.0112945
0.989	0.0364563	0.040526	0.0397422	0.037803	0.0370818	-0.0299821	0.000237698	-0.00828908	-0.0733224	0.00353104
0.99	0.0380961	0.0387566	0.0382242	0.0362258	0.0375771	-0.0260573	-0.000339297	-0.00558253	-0.0680258	-0.00279142
0.991	0.0394758	0.0363903	0.0369278	0.0337248	0.037886	-0.0221738	-0.00218548	-0.00315197	-0.0615761	-0.00716057
0.992	0.0403582	0.0337245	0.0358435	0.0307344	0.0382836	-0.0186651	-0.00505714	-0.00117067	-0.0547705	-0.00959135
0.993	0.0406045	0.0311194	0.0349736	0.027946	0.03905	-0.0161305	-0.00855704	0.000376069	-0.0481834	-0.0102819
0.994	0.0402503	0.0288003	0.0343144	0.0258975	0.0402408	-0.0153149	-0.0120495	0.00168864	-0.0422845	-0.00940466
0.995	0.0393375	0.0267546	0.0337955	0.024705	0.0415942	-0.0165091	-0.0147324	0.00288218	-0.0377294	-0.0072316
0.996	0.0378959	0.0248755	0.0333207	0.0241837	0.0428179	-0.0194286	-0.0159748	0.00368142	-0.0349317	-0.00431693
0.997	0.0360317	0.023105	0.0327739	0.0241605	0.0436345	-0.0236885	-0.0156284	0.00348712	-0.0337033	-0.0013299
0.998	0.0339271	0.0214904	0.0319679	0.0245692	0.0438219	-0.0290813	-0.0141025	0.00163892	-0.0335948	0.00103965
0.999	0.0318453	0.0200475	0.0307423	0.0251847	0.0434751	-0.0353888	-0.0120158	-0.00242876	-0.0342629	0.00195452
1	0.0300195	0.0188688	0.029082	0.0255353	0.0428318	-0.0422068	-0.00982537	-0.00900735	-0.0354898	0.000575526
1.001	0.0285337	0.0184753	0.0270871	0.0251094	0.0418814	-0.0491009	-0.00787966	-0.0181264	-0.037222	-0.00359773
1.002	0.0274211	0.0193279	0.0250314	0.0235463	0.0405266	-0.0557694	-0.00650176	-0.0299383	-0.0396401	-0.010587
1.003	0.0302601	0.0210745	0.0233123	0.0208067	0.0388274	-0.0620272	-0.005819	-0.0449838	-0.0429799	-0.0201613
1.004	0.0548526	0.0227205	0.0221687	0.0171767	0.0369126	-0.0677195	-0.00571787	-0.0637481	-0.0471577	-0.0320371
1.005	0.13116	0.0232949	0.0216805	0.0130608	0.0348874	-0.0726564	-0.00601391	-0.0858371	-0.0514428	-0.0456884
1.006	0.272085	0.0224084	0.0218981	0.00880179	0.0327254	-0.07651	-0.00653014	-0.10976	-0.0547198	-0.0602242
1.007	0.456096	0.0203337	0.0227408	0.00458202	0.0302486	-0.078823	-0.00706425	-0.133441	-0.056311	-0.0747436
1.008	0.644382	0.0176381	0.0239768	0.000399055	0.0272333	-0.0793435	-0.00746059	-0.15464	-0.0562715	-0.0887209
1.009	0.801937	0.0149138	0.0252572	-0.00381145	0.0234999	-0.0781339	-0.00765312	-0.171099	-0.0548957	-0.101946
1.01	0.905743	0.0128787	0.0261908	-0.00799716	0.0191139	-0.075315	-0.00760383	-0.180969	-0.0523748	-0.114181
1.011	0.945888	0.0124232	0.0266685	-0.0119479	0.0145031	-0.0710268	-0.00746289	-0.183314	-0.0489682	-0.125063
1.012	0.923559	0.0140399	0.0269151	-0.015407	0.010165	-0.065582	-0.00762854	-0.178203	-0.0451857	-0.134398
1.013	0.847817	0.0174638	0.0270535	-0.018176	0.00631021	-0.059503	-0.00831554	-0.166488	-0.0415588	-0.142203
1.014	0.732222	0.022039	0.0269575	-0.0201375	0.00293825	-0.0534125	-0.00934885	-0.149538	-0.0382562	-0.148504
1.015	0.592012	0.026989	0.026638	-0.021285	9.9e-05	-0.0479135	-0.0105315	-0.129108	-0.03519	-0.153421
1.016	0.442034	0.0315654	0.0263415	-0.0217202	-0.00215392	-0.043482	-0.0118071	-0.107192	-0.0325596	-0.157249
1.017	0.295285	0.0353182	0.0261732	-0.0215576	-0.00393303	-0.0403337	-0.0131368	-0.0856744	-0.0310047	-0.160344
1.018	0.161936	0.0381868	0.0260208	-0.0209163	-0.00540956	-0.0383319	-0.0146169	-0.0659176	-0.0310967	-0.163028
1.019	0.0488111	0.0403284	0.0258259	-0.0199318	-0.00662205	-0.0370781	-0.016591	-0.0487714	-0.0328232	-0.165413
1.02	-0.0406355	0.0418823	0.0256674	-0.0186789	-0.00749512	-0.0361813	-0.0193845	-0.0348666	-0.0357213	-0.167299
1.021	-0.105607	0.0429105	0.0257336	-0.0171998	-0.00797724	-0.0353286	-0.0229767	-0.0246014	-0.0394343	-0.168294
1.022	-0.147124	0.0434301	0.0263145	-0.0155226	-0.00807883	-0.0341532	-0.0270734	-0.0179093	-0.0437795	-0.168017
1.023	-0.167738	0.0434293	0.0276255	-0.013584	-0.00772513	-0.0322538	-0.0312813	-0.0142105	-0.0483665	-0.166178
1.024	-0.171183	0.0430162	0.0296599	-0.0113011	-0.00671334	-0.0294035	-0.0350236	-0.0125837	-0.0525571	-0.162415
1.025	-0.161711	0.0424465	0.0322397	-0.00870708	-0.00482249	-0.0257384	-0.0375894	-0.0120124	-0.0556837	-0.156229
1.026	-0.143516	0.0419828	0.0351113	-0.0059143	-0.0018352	-0.0216737	-0.0383891	-0.0117089	-0.0571371	-0.147237
1.027	-0.120375	0.0418463	0.0380077	-0.00298174	0.00241666	-0.0175929	-0.0370925	-0.0111806	-0.0563086	-0.135523
1.028	-0.0955817	0.0420581	0.0406834	0.000182822	0.00787167	-0.0136272	-0.0336628	-0.00995312	-0.0527729	-0.121587
1.029	-0.0717286	0.042493	0.0430159	0.00384133	0.0142712	-0.00970121	-0.028274	-0.00750182	-0.0467987	-0.10593
1.03	-0.0505077	0.0432213	0.0450689	0.00829191	0.0215123	-0.00567222	-0.0211677	-0.00337052	-0.0392102	-0.0889051
1.031	-0.0328824	0.0443641	0.046929	0.0137232	0.029709	-0.00147192	-0.0126435	0.00273414	-0.0305884	-0.0710127
1.032	-0.0192119	0.0458189	0.0486624	0.0203356	0.038895	0.00291897	-0.00312413	0.010797	-0.0209946	-0.0529439
1.033	-0.00902058	0.0473997	0.0504802	0.0283294	0.0489006	0.0077561	0.00694	0.0203961	-0.010335	-0.0351327
1.034	-0.000881307	0.0488285	0.0526039	0.037602	0.0594851	0.0135016	0.017331	0.030951	0.00130809	-0.0176786
1.035	0.0066218	0.04969	0.0550238	0.0477337	0.070352	0.0205225	0.0280947	0.04206	0.01378	-0.00076963
1.036	0.0137994	0.0497051	0.0576352	0.0580617	0.0809907	0.0290187	0.0393987	0.0533654	0.0271735	0.015268
1.037	0.0201848	0.0488725	0.0603919	0.0677165	0.0907697	0.0390112	0.0514811	0.064451	0.041694	0.0302425
1.038	0.0252742	0.0473729	0.0631563	0.0758808	0.0990355	0.050229	0.0644858	0.0751154	0.0571282	0.0440069
1.039	0.0287787	0.0454309	0.065576	0.0819282	0.10502	0.0621175	0.0781227	0.0855077	0.0727563	0.0560978
1.04	0.0306291	0.0431414	0.0672211	0.0854787	0.108075	0.0740045	0.0914039	0.0959275	0.0877328	0.06576
1.041	0.0308318	0.0404296	0.0677371	0.0864882	0.107923	0.0851312	0.102891	0.106588	0.101186	0.0721558
1.042	0.0295081	0.0372833	0.0668581	0.0851232	0.104599	0.0945768	0.111246	0.117589	0.111966	0.074467
1.043	0.027029	0.0339492	0.0644697	0.0816357	0.0984631	0.101323	0.115507	0.128726	0.118818	0.072301
1.044	0.0238607	0.0308015	0.0607185	0.076416	0.090154	0.104483	0.115257	0.13921	0.121109	0.0659772
1.045	0.0203436	0.0280873	0.0560158	0.0700557	0.0801802	0.103658	0.110648	0.147854	0.118964	0.0562175
1.046	0.0166766	0.0259277	0.0509211	0.063363	0.0686067	0.0992027	0.102092	0.153503	0.112529	0.0437262
1.047	0.0130746	0.0244326	0.0458921	0.0572373	0.0554021	0.0920585	0.0900573	0.155409	0.101774	0.0292368
1.048	0.0097746	0.0236278	0.0411027	0.0523298	0.0410202	0.0833348	0.0751109	0.153525	0.0872648	0.0139333
1.049	0.00680925	0.0234673	0.0364732	0.0488885	0.026335	0.0740521	0.0580838	0.148303	0.0704171	-0.000739291
1.05	0.00415686	0.0239137	0.0318623	0.0469499	0.0121152	0.0650551	0.0401413	0.140234	0.0526905	-0.0139487
1.051	0.00213901	0.024866	0.0273289	0.0464126	-0.00114398	0.057011	0.0226016	0.129623	0.0349662	-0.0257303
1.052	0.0012462	0.0262172	0.0231797	0.0469501	-0.0130824	0.0503776	0.00657383	0.116645	0.0177585	-0.0363433
1.053	0.00164909	0.0279137	0.0197407	0.0480543	-0.0235094	0.0452805	-0.00734287	0.101583	0.00152975	-0.0458223
1.054	0.00308093	0.0296973	0.0170436	0.0492383	-0.0324073	0.0415946	-0.0190094	0.0850866	-0.0134769	-0.054215
1.055	0.00498055	0.0311337	0.0148279	0.05012	-0.0397517	0.0391483	-0.0284067	0.0682222	-0.0274658	-0.0617346
1.056	0.00117874	0.0319611	0.0129785	0.0503169	-0.0454802	0.0375849	-0.0354945	0.0519088	-0.0406835	-0.0684234
1.057	-0.0234957	0.0320218	0.011708	0.0495212	-0.0495597	0.0362148	-0.0404575	0.0363341	-0.0529072	-0.0741424
1.058	-0.0768714	0.0313044	0.011288	0.0476736	-0.0520374	0.0342963	-0.0439012	0.0214901	-0.0635626	-0.0789748
1.059	-0.145284	0.0302787	0.0118503	0.044975	-0.053145	0.0313576	-0.0467232	0.0078731	-0.0720463	-0.083142
1.06	-0.204984	0.0298029	0.0134192	0.0417059	-0.0532164	0.027272	-0.0497628	-0.00385521	-0.0779338	-0.086537
1.061	-0.238921	0.0307946	0.0159648	0.0380058	-0.0524011	0.0222104	-0.0535072	-0.0134251	-0.0811094	-0.088689
1.062	-0.241925	0.0339681	0.0192326	0.0340448	-0.0507326	0.016269	-0.0581998	-0.0208322	-0.0818367	-0.0891733
1.063	-0.217376	0.0395611	0.0226778	0.0299149	-0.0483786	0.009194	-0.064003	-0.0259135	-0.0806946	-0.0878669
1.064	-0.172655	0.0471555	0.0258586	0.0252778	-0.0454941	0.00113036	-0.0707968	-0.0285304	-0.0783213	-0.0851569
1.065	-0.116413	0.0558542	0.0286312	0.0201846	-0.042396	-0.00691906	-0.0784622	-0.0290212	-0.0754028	-0.0818815
1.066	-0.0567211	0.0647074	0.0309355	0.0156028	-0.0396747	-0.013911	-0.0873571	-0.0278556	-0.0726522	-0.0783398
1.067	1.31e-05	0.0729799	0.0327863	0.0125054	-0.0373059	-0.0193485	-0.0974922	-0.025032	-0.0702352	-0.0738749
1.068	0.0493314	0.0802668	0.0343499	0.0113149	-0.0345015	-0.0231131	-0.10781	-0.0202143	-0.067675	-0.0678742
1.069	0.0885555	0.0866304	0.03578	0.0120452	-0.0306554	-0.0251584	-0.116682	-0.0129913	-0.0645456	-0.0603282
1.07	0.116619	0.0923244	0.0370621	0.0144132	-0.0256049	-0.0252414	-0.122428	-0.00284952	-0.0606404	-0.0514381
1.071	0.133713	0.0969767	0.0381122	0.0179076	-0.0193434	-0.0228899	-0.123874	0.0105092	-0.0557122	-0.0414249
1.072	0.140883	0.0995803	0.0390438	0.0220013	-0.0119652	-0.0177703	-0.120724	0.0268547	-0.049638	-0.0307417
1.073	0.139896	0.099431	0.0402367	0.0262751	-0.00372408	-0.0100343	-0.113284	0.0456261	-0.042692	-0.0200563
1.074	0.132846	0.0966321	0.0406634	0.0302091	0.00501142	-0.00530866	-0.102356	0.0659512	-0.0354241	-0.00993511
1.075	0.121718	0.0919338	0.0379357	0.0298444	0.0139828	-0.0168248	-0.0892731	0.0864009	-0.0283611	-0.000719958
1.076	0.108472	0.0863624	0.0335533	0.0185082	0.0232669	-0.0502189	-0.0756677	0.105491	-0.026948	0.00106857
1.077	0.0949573	0.0809287	0.0333832	-0.00103724	0.0325954	-0.0948677	-0.0628459	0.122358	-0.0458365	-0.0195515
1.078	0.0824001	0.0762853	0.0411757	-0.0156976	0.0423381	-0.136401	-0.0513545	0.13642	-0.0944477	-0.0661966
1.079	0.0713162	0.0725147	0.0560885	-0.0163948	0.0566118	-0.165687	-0.0415273	0.147082	-0.162304	-0.121665
1.08	0.0618502	0.0693907	0.0748465	-0.00241318	0.080431	-0.178526	-0.0339258	0.154099	-0.228783	-0.166443
1.081	0.0540506	0.0667004	0.0937572	0.0228336	0.113565	-0.174448	-0.0288356	0.157704	-0.277867	-0.190449
1.082	0.0479846	0.0643643	0.10968	0.0540297	0.150778	-0.155503	-0.0259852	0.158447	-0.301598	-0.191001
1.083	0.0436354	0.062483	0.120558	0.0853114	0.185559	-0.125277	-0.0247653	0.157141	-0.298377	-0.170172
1.084	0.0408193	0.061299	0.125793	0.111825	0.2126	-0.0879629	-0.024317	0.154793	-0.270889	-0.132945
1.085	0.0392342	0.0609008	0.126032	0.130695	0.228912	-0.0475926	-0.0236318	0.152347	-0.224459	-0.0855982
1.086	0.0385202	0.0610504	0.122393	0.140928	0.233871	-0.00765642	-0.0218036	0.150351	-0.165633	-0.034244
1.087	0.0383849	0.0615217	0.115892	0.143134	0.228614	0.0291176	-0.0182219	0.14888	-0.10117	0.0160052
1.088	0.0386976	0.0623137	0.107511	0.138978	0.215305	0.0608847	-0.0125638	0.147947	-0.0373479	0.0612027
1.089	0.0394392	0.0635489	0.0984251	0.130288	0.196575	0.0866573	-0.00461801	0.147872	0.020855	0.0986932
1.09	0.0405097	0.0654402	0.0898971	0.118667	0.175068	0.106187	0.00585178	0.149067	0.070416	0.127333
1.091	0.0416429	0.0682274	0.0829059	0.105633	0.15304	0.119792	0.0191342	0.151722	0.110263	0.147379
1.092	0.0426956	0.0721662	0.077632	0.0927286	0.132193	0.128152	0.0354083	0.155837	0.140696	0.159857
1.093	0.0438179	0.0774379	0.0730284	0.0811295	0.11388	0.131776	0.0543913	0.161174	0.162524	0.165944
1.094	0.0452355	0.083623	0.0670369	0.0709892	0.0991331	0.130333	0.0752271	0.167197	0.176424	0.166828
1.095	0.0471284	0.089316	0.0576331	0.0611763	0.0882798	0.122702	0.0967679	0.173044	0.18284	0.163477
1.096	0.0497135	0.0926697	0.0437459	0.0497326	0.0804618	0.107788	0.117735	0.17708	0.182024	0.156161
1.097	0.0532224	0.0924181	0.0252774	0.0349456	0.0734434	0.0851056	0.136411	0.176714	0.174003	0.144361
1.098	0.0576761	0.0882281	0.00272301	0.0161624	0.0644767	0.0548221	0.15034	0.169289	0.158785	0.127364
1.099	0.0626886	0.0802662	-0.0231228	-0.00627103	0.051754	0.0177264	0.156835	0.153338	0.136351	0.105148
1.1	0.0674571	0.0687786	-0.0514295	-0.0315127	0.0348453	-0.0249102	0.154139	0.128951	0.106317	0.0788638
1.101	0.0710264	0.0540361	-0.0814502	-0.0586827	0.0141864	-0.0716394	0.142116	0.0971812	0.0685107	0.0504118
1.102	0.0727232	0.0363357	-0.112466	-0.0871095	-0.00938661	-0.121026	0.121877	0.0593339	0.0240729	0.0215235
1.103	0.0723028	0.0158876	-0.143802	-0.116242	-0.0350028	-0.171613	0.0949154	0.0166509	-0.0247603	-0.00679375
1.104	0.0697899	-0.00720477	-0.174869	-0.145299	-0.0619866	-0.221947	0.0626029	-0.0296878	-0.0756983	-0.0341739
1.105	0.065235	-0.032733	-0.205049	-0.173154	-0.0897592	-0.270907	0.0262267	-0.0785135	-0.126745	-0.0606116
1.106	0.0585549	-0.0601126	-0.233678	-0.198589	-0.117643	-0.317779	-0.0127643	-0.128476	-0.176085	-0.0861828
1.107	0.0496593	-0.0884512	-0.260168	-0.220637	-0.144689	-0.361972	-0.0527122	-0.177969	-0.22204	-0.11091
1.108	0.0386322	-0.116868	-0.284025	-0.238846	-0.169699	-0.403072	-0.0919896	-0.225501	-0.263166	-0.134806
1.109	0.025666	-0.144601	-0.304888	-0.253142	-0.191687	-0.441018	-0.129376	-0.270027	-0.298617	-0.157833
1.11	0.0109306	-0.171038	-0.322705	-0.263689	-0.210293	-0.475824	-0.164296	-0.310916	-0.328403	-0.179799
1.111	-0.00536887	-0.195809	-0.337802	-0.270982	-0.225595	-0.507277	-0.196679	-0.347667	-0.353215	-0.20044
1.112	-0.0229148	-0.21872	-0.350767	-0.275588	-0.237755	-0.535118	-0.226648	-0.379702	-0.373997	-0.21967
1.113	-0.0413288	-0.239762	-0.362298	-0.277926	-0.246953	-0.559326	-0.254427	-0.406478	-0.391525	-0.237615
1.114	-0.0602054	-0.259334	-0.373154	-0.278561	-0.253371	-0.580071	-0.28025	-0.427701	-0.406268	-0.254407
1.115	-0.0791795	-0.278161	-0.384299	-0.278317	-0.25715	-0.597677	-0.304122	-0.443356	-0.418515	-0.270147
1.116	-0.0979988	-0.296941	-0.396866	-0.278116	-0.258432	-0.612547	-0.325843	-0.453713	-0.428551	-0.284847
1.117	-0.116487	-0.316242	-0.411768	-0.278893	-0.257538	-0.624751	-0.345275	-0.459425	-0.436681	-0.298279
1.118	-0.134586	-0.336615	-0.429451	-0.28137	-0.25507	-0.633998	-0.362448	-0.461446	-0.443147	-0.310038
1.119	-0.15249	-0.35859	-0.450001	-0.285894	-0.251788	-0.640169	-0.377571	-0.460718	-0.448163	-0.319743
1.12	-0.170654	-0.382584	-0.473243	-0.292657	-0.248459	-0.643551	-0.390885	-0.457997	-0.451959	-0.327147
1.121	-0.189681	-0.408887	-0.498736	-0.301828	-0.245778	-0.644714	-0.402452	-0.4539	-0.454678	-0.332009
1.122	-0.210169	-0.437626	-0.525871	-0.313464	-0.244275	-0.644247	-0.412253	-0.448956	-0.456417	-0.334045
1.123	-0.232653	-0.468723	-0.554104	-0.327463	-0.244398	-0.642363	-0.420318	-0.44354	-0.457344	-0.333132
1.124	-0.257614	-0.501929	-0.583021	-0.343559	-0.246615	-0.639012	-0.426569	-0.437845	-0.457624	-0.32946
1.125	-0.28538	-0.53688	-0.61225	-0.361425	-0.251266	-0.634281	-0.430804	-0.4319	-0.457255	-0.323385
1.126	-0.316062	-0.573142	-0.641369	-0.380823	-0.258446	-0.628276	-0.43281	-0.425496	-0.455983	-0.315191
1.127	-0.349687	-0.610197	-0.669821	-0.40151	-0.268064	-0.620853	-0.432286	-0.41832	-0.453444	-0.305189
1.128	-0.386301	-0.647502	-0.697088	-0.42301	-0.279941	-0.611703	-0.428897	-0.410219	-0.449375	-0.293954
1.129	-0.425825	-0.684651	-0.722904	-0.444635	-0.293842	-0.600539	-0.422581	-0.401164	-0.443663	-0.282193
1.13	-0.468002	-0.721306	-0.747166	-0.465785	-0.309377	-0.587294	-0.413522	-0.391041	-0.436289	-0.270471
1.131	-0.512525	-0.756979	-0.769811	-0.486161	-0.32592	-0.572175	-0.401889	-0.379719	-0.427227	-0.258985
1.132	-0.558991	-0.791158	-0.790906	-0.505624	-0.342788	-0.555535	-0.387889	-0.36727	-0.416466	-0.247533
1.133	-0.606772	-0.823486	-0.810598	-0.524011	-0.359582	-0.537801	-0.372007	-0.353997	-0.404245	-0.235824
1.134	-0.655103	-0.853672	-0.828944	-0.541214	-0.376165	-0.51944	-0.355055	-0.340163	-0.391018	-0.223703
1.135	-0.70323	-0.881516	-0.845971	-0.557366	-0.392279	-0.500867	-0.337846	-0.325726	-0.377142	-0.211171
1.136	-0.750533	-0.907	-0.861742	-0.572823	-0.407395	-0.482489	-0.320857	-0.310555	-0.362866	-0.198554
1.137	-0.796606	-0.930292	-0.87618	-0.587865	-0.421116	-0.464814	-0.304421	-0.294743	-0.348412	-0.186429
1.138	-0.841266	-0.951763	-0.888966	-0.602461	-0.433457	-0.448234	-0.28895	-0.27864	-0.33403	-0.175232
1.139	-0.884531	-0.971775	-0.899823	-0.616348	-0.444576	-0.432745	-0.274905	-0.262837	-0.320126	-0.165141
1.14	-0.926459	-0.990346	-0.908795	-0.629245	-0.454502	-0.418135	-0.262854	-0.247926	-0.307235	-0.156092
1.141	-0.966942	-1.00725	-0.916181	-0.641054	-0.463167	-0.404404	-0.253212	-0.234137	-0.295714	-0.147711
1.142	-1.00574	-1.02224	-0.922388	-0.651956	-0.470379	-0.391754	-0.245731	-0.22154	-0.285405	-0.139396
1.143	-1.04265	-1.0351	-0.92775	-0.662295	-0.475925	-0.380365	-0.239661	-0.210403	-0.27584	-0.130389
1.144	-1.0776	-1.04573	-0.932406	-0.672305	-0.479877	-0.370411	-0.234521	-0.201119	-0.266919	-0.119917
1.145	-1.11068	-1.05424	-0.936374	-0.682041	-0.482636	-0.361997	-0.230423	-0.194031	-0.258985	-0.107515
1.146	-1.14199	-1.06085	-0.939611	-0.691465	-0.484791	-0.354987	-0.227723	-0.189302	-0.252371	-0.0934236
1.147	-1.17165	-1.06594	-0.942095	-0.700429	-0.486953	-0.349006	-0.226659	-0.186798	-0.247336	-0.0787165
1.148	-1.19968	-1.0699	-0.943962	-0.708668	-0.489408	-0.343498	-0.227142	-0.186089	-0.244156	-0.064799
1.149	-1.22603	-1.073	-0.945375	-0.715875	-0.492003	-0.337898	-0.228663	-0.186598	-0.242877	-0.0528125
1.15	-1.25058	-1.07522	-0.946468	-0.72166	-0.494495	-0.331904	-0.23052	-0.187798	-0.243144	-0.0435145
1.151	-1.27313	-1.0764	-0.947393	-0.725621	-0.496776	-0.325489	-0.232152	-0.18924	-0.244346	-0.0373793
1.152	-1.29345	-1.07655	-0.948224	-0.727551	-0.49872	-0.318599	-0.233116	-0.190626	-0.245895	-0.0346114
1.153	-1.31145	-1.07593	-0.948929	-0.727609	-0.500082	-0.310828	-0.232882	-0.191857	-0.247325	-0.035122
1.154	-1.32722	-1.07485	-0.949438	-0.726183	-0.500593	-0.301609	-0.23096	-0.192948	-0.24822	-0.0385649
1.155	-1.3409	-1.07361	-0.949804	-0.723576	-0.500051	-0.290769	-0.227211	-0.194033	-0.248339	-0.0443402
1.156	-1.35256	-1.07247	-0.950134	-0.720141	-0.498357	-0.27873	-0.221741	-0.195317	-0.247572	-0.0516432
1.157	-1.36226	-1.07159	-0.950152	-0.716437	-0.495512	-0.266352	-0.214573	-0.196967	-0.245708	-0.0595673
1.158	-1.37023	-1.07102	-0.949057	-0.712786	-0.491845	-0.254563	-0.205672	-0.198975	-0.24248	-0.0671559
1.159	-1.37687	-1.07062	-0.946264	-0.708862	-0.488077	-0.243744	-0.195171	-0.20107	-0.237809	-0.0736842
1.16	-1.38253	-1.07034	-0.942148	-0.704123	-0.484731	-0.233519	-0.183574	-0.203066	-0.232033	-0.0789208
1.161	-1.38729	-1.07028	-0.937602	-0.698679	-0.481432	-0.223596	-0.171592	-0.205029	-0.225801	-0.082917
1.162	-1.39112	-1.07041	-0.93317	-0.693107	-0.477266	-0.214406	-0.159415	-0.206533	-0.219363	-0.0855236
1.163	-1.39131	-1.0703	-0.929061	-0.687712	-0.472029	-0.206374	-0.146431	-0.206206	-0.212203	-0.0861677
1.164	-1.37983	-1.06942	-0.925514	-0.682862	-0.466359	-0.19938	-0.132152	-0.2028	-0.203847	-0.0843623
1.165	-1.35007	-1.06756	-0.922775	-0.679277	-0.460825	-0.193328	-0.117041	-0.196357	-0.194672	-0.0801204
1.166	-1.30498	-1.06473	-0.920934	-0.677273	-0.455967	-0.188366	-0.102085	-0.18768	-0.185378	-0.0736064
1.167	-1.2542	-1.06091	-0.919953	-0.676585	-0.452543	-0.18444	-0.0881516	-0.177274	-0.176291	-0.0651212
1.168	-1.20745	-1.05617	-0.919661	-0.676959	-0.450923	-0.181205	-0.0759745	-0.165307	-0.16777	-0.0555569
1.169	-1.17187	-1.05069	-0.919744	-0.678276	-0.4508	-0.178343	-0.0660513	-0.152018	-0.16032	-0.0461395
1.17	-1.15145	-1.04468	-0.919881	-0.680252	-0.451691	-0.175674	-0.058363	-0.13768	-0.153936	-0.0377308
1.171	-1.14701	-1.03843	-0.919741	-0.68249	-0.453305	-0.173119	-0.0525659	-0.122496	-0.148231	-0.0307413
1.172	-1.15674	-1.03228	-0.918969	-0.684704	-0.455365	-0.17067	-0.0484121	-0.106747	-0.143158	-0.0254488
1.173	-1.17737	-1.02645	-0.917447	-0.686677	-0.457504	-0.168279	-0.0457366	-0.0908221	-0.138966	-0.0219541
1.174	-1.20514	-1.02091	-0.915351	-0.688182	-0.45946	-0.165774	-0.0441742	-0.0749658	-0.135593	-0.0198765
1.175	-1.23635	-1.01558	-0.912837	-0.689044	-0.461031	-0.162929	-0.043188	-0.0591906	-0.132626	-0.018549
1.176	-1.26761	-1.01046	-0.909902	-0.689228	-0.461924	-0.159613	-0.0423043	-0.0434669	-0.129917	-0.0174692
1.177	-1.29628	-1.00537	-0.906452	-0.688858	-0.461812	-0.155914	-0.0410786	-0.027778	-0.127641	-0.016077
1.178	-1.3207	-1.00013	-0.902481	-0.688137	-0.460496	-0.152184	-0.0390164	-0.0119871	-0.125594	-0.0133881
1.179	-1.33982	-0.99469	-0.898245	-0.687138	-0.457944	-0.148907	-0.0358013	0.00403846	-0.123096	-0.00837759
1.18	-1.35319	-0.989175	-0.89412	-0.685819	-0.454266	-0.14641	-0.0315131	0.0201356	-0.119576	-0.000423374
1.181	-1.36082	-0.98375	-0.890407	-0.684213	-0.449714	-0.144637	-0.0264532	0.035857	-0.114994	0.0108741
1.182	-1.363	-0.978581	-0.887361	-0.682369	-0.44461	-0.143131	-0.0209	0.0507062	-0.109751	0.0258199
1.183	-1.3604	-0.973912	-0.885149	-0.680278	-0.439378	-0.141308	-0.015193	0.0643916	-0.104139	0.0443396
1.184	-1.3541	-0.970003	-0.883774	-0.677831	-0.434511	-0.138821	-0.00969189	0.0769705	-0.0981896	0.0659885
1.185	-1.34533	-0.96696	-0.883037	-0.674804	-0.430291	-0.135605	-0.00446628	0.0886338	-0.092004	0.0899495
1.186	-1.33525	-0.964612	-0.882553	-0.67112	-0.426789	-0.131653	0.000665551	0.0992916	-0.0856375	0.114448
1.187	-1.3248	-0.962567	-0.881897	-0.666847	-0.424026	-0.126824	0.00576778	0.108489	-0.0788852	0.136906
1.188	-1.31471	-0.960499	-0.880716	-0.661955	-0.421971	-0.120881	0.0106495	0.115717	-0.0715332	0.155131
1.189	-1.30557	-0.958323	-0.878771	-0.656446	-0.42051	-0.113744	0.015133	0.120784	-0.0635487	0.168026
1.19	-1.29756	-0.956057	-0.876011	-0.65043	-0.419376	-0.105418	0.0193061	0.123847	-0.054897	0.175567
1.191	-1.29057	-0.953626	-0.872484	-0.644104	-0.418097	-0.095836	0.0233305	0.124992	-0.0454513	0.178551
1.192	-1.28433	-0.950908	-0.868132	-0.637744	-0.416181	-0.0851308	0.0271192	0.124076	-0.0352153	0.17815
1.193	-1.27857	-0.947846	-0.862939	-0.631492	-0.413296	-0.0738032	0.0304665	0.121154	-0.0244389	0.175541
1.194	-1.27299	-0.944462	-0.857198	-0.625348	-0.409286	-0.0624436	0.0334885	0.116595	-0.013408	0.171883
1.195	-1.26733	-0.94085	-0.851367	-0.619539	-0.404209	-0.0515898	0.0367081	0.11073	-0.0022952	0.168192
1.196	-1.2614	-0.937057	-0.845785	-0.614584	-0.398332	-0.0417924	0.0405866	0.103882	0.00857595	0.165043
1.197	-1.25508	-0.93303	-0.840671	-0.610862	-0.391949	-0.0335179	0.0450947	0.0965576	0.0185332	0.162472
1.198	-1.24838	-0.928721	-0.836243	-0.608352	-0.385454	-0.0270084	0.0498281	0.0892276	0.0268969	0.160016
1.199	-1.24128	-0.92414	-0.832605	-0.606829	-0.379493	-0.0222761	0.0542763	0.0820728	0.0333855	0.15696
1.2	-1.2325	-0.919322	-0.829534	-0.606158	-0.374659	-0.0191942	0.0578926	0.0749591	0.037959	0.152716
1.201	-1.21903	-0.914233	-0.826624	-0.606212	-0.371236	-0.0175662	0.0600897	0.0675979	0.0404969	0.146909
1.202	-1.19936	-0.908737	-0.823645	-0.606686	-0.369243	-0.0170296	0.0603334	0.0598991	0.041029	0.139292
1.203	-1.17579	-0.902804	-0.820576	-0.607148	-0.368386	-0.0170133	0.0583683	0.052113	0.0399103	0.129707
1.204	-1.15239	-0.896756	-0.817471	-0.607401	-0.368101	-0.0170107	0.054232	0.04455	0.0374453	0.118162
1.205	-1.13301	-0.891045	-0.814471	-0.607622	-0.367913	-0.0168981	0.0481594	0.0374949	0.033754	0.105044
1.206	-1.1203	-0.885923	-0.811808	-0.608067	-0.367715	-0.0168228	0.040659	0.0313308	0.0291695	0.0911352
1.207	-1.11493	-0.881526	-0.809632	-0.608943	-0.367609	-0.0168674	0.0323713	0.0262401	0.0244135	0.0772239
1.208	-1.11594	-0.877969	-0.807775	-0.610358	-0.367622	-0.0170659	0.023736	0.0220127	0.020077	0.0638026
1.209	-1.12159	-0.875241	-0.805826	-0.612155	-0.367677	-0.0175514	0.0150386	0.0184444	0.0160866	0.0511269
1.21	-1.13002	-0.873133	-0.803451	-0.613996	-0.367596	-0.0184482	0.00668504	0.0155646	0.0120281	0.039423
1.211	-1.13956	-0.871346	-0.800544	-0.615702	-0.367164	-0.0197314	-0.000839255	0.0135142	0.00782146	0.0289405
1.212	-1.14876	-0.869611	-0.797232	-0.61735	-0.366324	-0.0213724	-0.00721344	0.0125957	0.00367435	0.0198167
1.213	-1.15645	-0.867647	-0.793844	-0.61908	-0.365219	-0.0236019	-0.0122334	0.0132337	-0.00028097	0.0119796
1.214	-1.16189	-0.864454	-0.790774	-0.620977	-0.364129	-0.0268695	-0.0156684	0.015496	-0.00388244	0.00530684
1.215	-1.16459	-0.858122	-0.788257	-0.62303	-0.363383	-0.0314463	-0.0175223	0.0188594	-0.00690097	-0.000206231
1.216	-1.16439	-0.848139	-0.786268	-0.625099	-0.363323	-0.0371087	-0.0182331	0.0225754	-0.00934878	-0.00457574
1.217	-1.16153	-0.836551	-0.78462	-0.626965	-0.36431	-0.0432979	-0.0184815	0.0260122	-0.0116218	-0.00794804
1.218	-1.15661	-0.825829	-0.782959	-0.628467	-0.366545	-0.0492953	-0.0189819	0.0287475	-0.014219	-0.0106197
1.219	-1.15026	-0.817382	-0.778804	-0.629439	-0.369852	-0.0467187	-0.020268	0.0305359	-0.0172355	-0.0130505
1.22	-1.14297	-0.811562	-0.766685	-0.629556	-0.373803	-0.0155132	-0.022573	0.0313183	-0.0203483	-0.0157161
1.221	-1.13511	-0.807827	-0.744605	-0.628616	-0.377902	0.0535662	-0.0258523	0.0313948	-0.0231856	-0.0188793
1.222	-1.12691	-0.80532	-0.718403	-0.626911	-0.381486	0.143734	-0.0296424	0.0353163	-0.0185097	-0.0224842
1.223	-1.11851	-0.803525	-0.695947	-0.625004	-0.383942	0.230108	-0.0291202	0.0534017	0.0117172	-0.0262215
1.224	-1.11022	-0.802439	-0.681655	-0.623302	-0.38517	0.2956	-0.013736	0.0897691	0.0759417	-0.0296557
1.225	-1.10234	-0.80236	-0.676466	-0.62189	-0.3854	0.331769	0.020609	0.13556	0.159044	-0.0324537
1.226	-1.09505	-0.803531	-0.679162	-0.62067	-0.384705	0.337015	0.0648754	0.178714	0.238501	-0.0345774
1.227	-1.08835	-0.805877	-0.687362	-0.619641	-0.382908	0.314739	0.106909	0.21086	0.298744	-0.0361218
1.228	-1.08214	-0.8089	-0.698311	-0.618877	-0.379821	0.271479	0.138392	0.227095	0.331986	-0.0371651
1.229	-1.07625	-0.811876	-0.709756	-0.618342	-0.375546	0.215281	0.154449	0.225776	0.336575	-0.0378771
1.23	-1.07059	-0.814248	-0.720423	-0.617944	-0.370445	0.154157	0.153305	0.208273	0.31534	-0.0384319
1.231	-1.06514	-0.815731	-0.729708	-0.617658	-0.364945	0.0945179	0.136166	0.17798	0.27404	-0.0388526
1.232	-1.06002	-0.816214	-0.737245	-0.617418	-0.359454	0.0405261	0.106485	0.139113	0.219823	-0.0390824
1.233	-1.05534	-0.815739	-0.742888	-0.617057	-0.354479	-0.00537409	0.068774	0.0958535	0.159985	-0.0390489
1.234	-1.05116	-0.814492	-0.746766	-0.616338	-0.350614	-0.0418459	0.0275146	0.0517529	0.101194	-0.0387791
1.235	-1.0475	-0.812715	-0.749034	-0.614862	-0.34818	-0.0685961	-0.0135486	0.00952385	0.0487248	-0.0385361
1.236	-1.04422	-0.810639	-0.749781	-0.612097	-0.34711	-0.0863877	-0.0514935	-0.0289109	0.00566488	-0.0386909
1.237	-1.04115	-0.808426	-0.749242	-0.607764	-0.347159	-0.0966101	-0.0841289	-0.0623149	-0.0271215	-0.0394941
1.238	-1.03828	-0.806216	-0.747735	-0.602145	-0.347929	-0.100819	-0.109971	-0.0900556	-0.0501133	-0.041003
1.239	-1.03564	-0.804297	-0.745502	-0.595837	-0.348879	-0.100578	-0.128166	-0.111965	-0.0643043	-0.0430254
1.24	-1.03317	-0.803005	-0.742701	-0.58931	-0.349506	-0.0973669	-0.13856	-0.128164	-0.0711324	-0.0451657
1.241	-1.03076	-0.802391	-0.739444	-0.582782	-0.349531	-0.0924057	-0.141787	-0.139106	-0.0725549	-0.0471186
1.242	-1.02821	-0.802269	-0.735828	-0.576374	-0.348814	-0.0865087	-0.138992	-0.145633	-0.0707188	-0.0488194
1.243	-1.02531	-0.80236	-0.731963	-0.570191	-0.347159	-0.0803465	-0.131451	-0.148833	-0.0674957	-0.0503504
1.244	-1.022	-0.802268	-0.727953	-0.564275	-0.34429	-0.0746944	-0.12056	-0.149881	-0.0641392	-0.0518239
1.245	-1.01837	-0.801605	-0.723855	-0.558626	-0.34008	-0.0701234	-0.107845	-0.149874	-0.0612315	-0.0532547
1.246	-1.01452	-0.800103	-0.719611	-0.553281	-0.334854	-0.0667164	-0.0946642	-0.149591	-0.0589672	-0.0545052
1.247	-1.01041	-0.797578	-0.715159	-0.548308	-0.329224	-0.0642662	-0.0820065	-0.149441	-0.057401	-0.0553904
1.248	-1.00602	-0.793927	-0.710758	-0.543704	-0.32363	-0.0625942	-0.0706098	-0.149694	-0.0565411	-0.0557852
1.249	-1.00138	-0.789199	-0.706906	-0.539366	-0.318406	-0.0616978	-0.0612117	-0.150533	-0.0564605	-0.0556579
1.25	-0.996624	-0.783573	-0.703939	-0.535173	-0.314033	-0.0617208	-0.0546261	-0.151851	-0.0572612	-0.0551053
1.251	-0.991937	-0.777238	-0.701929	-0.53113	-0.310891	-0.0627704	-0.0514545	-0.153261	-0.0589597	-0.0543122
1.252	-0.987473	-0.770367	-0.700799	-0.527408	-0.309021	-0.0647853	-0.0516709	-0.154397	-0.061515	-0.0535051
1.253	-0.983194	-0.763236	-0.700372	-0.524235	-0.308311	-0.0676444	-0.0546596	-0.155139	-0.06486	-0.0530133
1.254	-0.978962	-0.756224	-0.700358	-0.521787	-0.308617	-0.0713471	-0.0596721	-0.155533	-0.0689485	-0.0532727
1.255	-0.974644	-0.74967	-0.70041	-0.520159	-0.309746	-0.0759298	-0.0660613	-0.155491	-0.0736789	-0.054589
1.256	-0.970185	-0.743816	-0.700275	-0.519414	-0.311548	-0.081209	-0.0732528	-0.154777	-0.0785906	-0.0569184
1.257	-0.965723	-0.738723	-0.699875	-0.519665	-0.313833	-0.0867639	-0.0807951	-0.153353	-0.0830491	-0.0600472
1.258	-0.961478	-0.734295	-0.699156	-0.521008	-0.316249	-0.0921269	-0.0884032	-0.151298	-0.0868148	-0.0638216
1.259	-0.957479	-0.730427	-0.69792	-0.523285	-0.318512	-0.096973	-0.0959247	-0.148307	-0.0899843	-0.0680149
1.26	-0.953539	-0.727035	-0.696003	-0.526064	-0.320573	-0.101175	-0.103149	-0.143693	-0.0925344	-0.0721791
1.261	-0.949488	-0.724016	-0.693394	-0.528894	-0.322422	-0.104722	-0.109608	-0.136874	-0.0942963	-0.0757543
1.262	-0.945326	-0.721212	-0.690079	-0.531363	-0.323917	-0.107579	-0.114861	-0.127571	-0.0953158	-0.0782067
1.263	-0.941191	-0.718414	-0.68613	-0.532992	-0.324937	-0.109535	-0.11879	-0.115863	-0.0959263	-0.0793243
1.264	-0.937262	-0.715488	-0.681866	-0.533337	-0.325516	-0.110242	-0.121503	-0.102184	-0.0963312	-0.0794994
1.265	-0.933651	-0.71253	-0.677708	-0.532269	-0.325643	-0.109391	-0.123207	-0.0871494	-0.0963768	-0.0793587
1.266	-0.930368	-0.70965	-0.67389	-0.530004	-0.32519	-0.106784	-0.124089	-0.0714396	-0.0957847	-0.0791564
1.267	-0.927268	-0.706799	-0.670388	-0.526896	-0.324113	-0.102433	-0.124312	-0.0556581	-0.0944032	-0.0788077
1.268	-0.924159	-0.70394	-0.66708	-0.523255	-0.322423	-0.0965915	-0.124007	-0.0400845	-0.0921719	-0.0783732
1.269	-0.92098	-0.701029	-0.66396	-0.519301	-0.320068	-0.0896229	-0.123208	-0.0248165	-0.088959	-0.0781096
1.27	-0.917732	-0.697986	-0.661162	-0.51518	-0.316982	-0.0819573	-0.121931	-0.0101488	-0.0847168	-0.0782253
1.271	-0.914372	-0.694814	-0.658714	-0.511017	-0.313289	-0.0740765	-0.120192	0.00357661	-0.0796715	-0.0788438
1.272	-0.910863	-0.691527	-0.656342	-0.50692	-0.309287	-0.0663267	-0.117807	0.016315	-0.0741097	-0.0797566
1.273	-0.907201	-0.688141	-0.653732	-0.503009	-0.305019	-0.0588808	-0.11443	0.0281867	-0.068139	-0.0802494
1.274	-0.903306	-0.684736	-0.650874	-0.499568	-0.300247	-0.0519031	-0.109682	0.0393966	-0.061733	-0.0793226
1.275	-0.899034	-0.681436	-0.647951	-0.49698	-0.295042	-0.0456058	-0.103091	0.0501597	-0.0549078	-0.0759409
1.276	-0.894394	-0.67839	-0.645107	-0.495531	-0.29004	-0.040252	-0.0945717	0.0602719	-0.0478386	-0.069804
1.277	-0.889649	-0.675667	-0.642385	-0.495302	-0.285919	-0.036093	-0.0848128	0.0691309	-0.040823	-0.061923
1.278	-0.885183	-0.673144	-0.639682	-0.496131	-0.282964	-0.03315	-0.0747474	0.0760954	-0.0341487	-0.0539183
1.279	-0.88124	-0.670557	-0.636789	-0.497672	-0.281268	-0.031154	-0.0651985	0.0804381	-0.0281736	-0.0471275
1.28	-0.877837	-0.667676	-0.633593	-0.499406	-0.280934	-0.0297955	-0.0568738	0.0814192	-0.0234132	-0.0423191
1.281	-0.874861	-0.664455	-0.630182	-0.500752	-0.281939	-0.0288518	-0.0501965	0.0787173	-0.0203207	-0.0398235
1.282	-0.872078	-0.661095	-0.626704	-0.501318	-0.28395	-0.0281075	-0.0452506	0.0725433	-0.0191431	-0.0397697
1.283	-0.869137	-0.657886	-0.623211	-0.500957	-0.286372	-0.0273941	-0.0418587	0.0633474	-0.0199546	-0.0420643
1.284	-0.865714	-0.654971	-0.619625	-0.499692	-0.288598	-0.0265347	-0.039718	0.0516315	-0.0226441	-0.0463544
1.285	-0.86172	-0.652347	-0.615904	-0.497576	-0.290099	-0.0252273	-0.0385816	0.0380265	-0.0268889	-0.0522427
1.286	-0.857338	-0.649978	-0.612226	-0.494625	-0.290353	-0.0233282	-0.0383089	0.0233461	-0.0321907	-0.059365
1.287	-0.852759	-0.647801	-0.608825	-0.491044	-0.288897	-0.0210692	-0.0386964	0.0085009	-0.0379635	-0.0671186
1.288	-0.84799	-0.645708	-0.60563	-0.487264	-0.285488	-0.0187558	-0.0392537	-0.00560624	-0.0436429	-0.0744454
1.289	-0.84302	-0.643581	-0.602402	-0.48373	-0.280261	-0.0163863	-0.0393294	-0.0183155	-0.0487652	-0.0800682
1.29	-0.838001	-0.641326	-0.599161	-0.480779	-0.27373	-0.0137418	-0.0385147	-0.0295017	-0.0529919	-0.0831889
1.291	-0.833272	-0.638899	-0.596096	-0.478564	-0.266492	-0.010948	-0.0367494	-0.0393471	-0.0561104	-0.0838251
1.292	-0.829153	-0.636379	-0.593278	-0.47715	-0.258954	-0.00855927	-0.0339269	-0.0478493	-0.0579515	-0.082151
1.293	-0.825673	-0.633916	-0.590755	-0.476683	-0.251471	-0.00705594	-0.0296888	-0.0548508	-0.0583667	-0.0780671
1.294	-0.822619	-0.631531	-0.588676	-0.477365	-0.244579	-0.00672354	-0.0239859	-0.0602708	-0.057474	-0.0717956
1.295	-0.819739	-0.629097	-0.587131	-0.479273	-0.23883	-0.00775217	-0.0174208	-0.0641056	-0.055766	-0.0641132
1.296	-0.816882	-0.626379	-0.586161	-0.482197	-0.234584	-0.0101538	-0.010767	-0.0664451	-0.0538314	-0.0558198
1.297	-0.813937	-0.623181	-0.585812	-0.485736	-0.232045	-0.0137827	-0.00464299	-0.0675544	-0.0521328	-0.0475601
1.298	-0.810776	-0.619585	-0.585908	-0.48945	-0.23117	-0.0183634	0.000359518	-0.067759	-0.0509829	-0.0399714
1.299	-0.80746	-0.615841	-0.585954	-0.492809	-0.231601	-0.023441	0.0036951	-0.0672201	-0.0505451	-0.033637
1.3	-0.804228	-0.612124	-0.585433	-0.495217	-0.23282	-0.0284189	0.00502152	-0.0659515	-0.0507614	-0.0289115
1.301	-0.801226	-0.608527	-0.584066	-0.496224	-0.234267	-0.032564	0.00425275	-0.0639629	-0.0513344	-0.0258208
1.302	-0.798482	-0.605112	-0.581777	-0.49565	-0.235496	-0.0351587	0.00161742	-0.0611404	-0.0519149	-0.0240787
1.303	-0.796086	-0.601922	-0.578673	-0.493477	-0.236274	-0.0358263	-0.00239103	-0.0570363	-0.0522218	-0.0232659
1.304	-0.794176	-0.599017	-0.575075	-0.489801	-0.236539	-0.0345958	-0.00718405	-0.0510379	-0.0519541	-0.0230678
1.305	-0.792785	-0.596456	-0.571339	-0.485027	-0.236378	-0.0317669	-0.0120654	-0.042719	-0.0507401	-0.0232128
1.306	-0.791808	-0.594219	-0.567658	-0.479778	-0.235978	-0.0277507	-0.0162295	-0.0320592	-0.0483309	-0.0233036
1.307	-0.791118	-0.592218	-0.564097	-0.474549	-0.235609	-0.0229121	-0.0190927	-0.0196806	-0.0448849	-0.0228204
1.308	-0.790602	-0.59046	-0.560724	-0.469688	-0.235687	-0.0175868	-0.0205495	-0.00673941	-0.0408057	-0.0213166
1.309	-0.7901	-0.589051	-0.557617	-0.465455	-0.236481	-0.012272	-0.0207326	0.00576233	-0.0363771	-0.0186163
1.31	-0.789416	-0.588014	-0.55485	-0.462042	-0.237813	-0.00765289	-0.019681	0.0173008	-0.0318448	-0.0146762
1.311	-0.78837	-0.587267	-0.552485	-0.459674	-0.239347	-0.00427739	-0.0173327	0.0274521	-0.0275506	-0.00950293
1.312	-0.786847	-0.586696	-0.550636	-0.458413	-0.240889	-0.0023365	-0.013755	0.0356435	-0.0237919	-0.00340455
1.313	-0.784785	-0.58615	-0.549529	-0.457989	-0.242361	-0.00194224	-0.00928013	0.0414116	-0.0207052	0.00287875
1.314	-0.782126	-0.585525	-0.549321	-0.458115	-0.243711	-0.00334257	-0.00434298	0.04474	-0.0182994	0.00840592
1.315	-0.778849	-0.584795	-0.549979	-0.458706	-0.244851	-0.00667195	0.000711131	0.0459119	-0.0166175	0.0124876
1.316	-0.775001	-0.583881	-0.551303	-0.459692	-0.245689	-0.0117903	0.00558767	0.0450317	-0.0158007	0.0149199
1.317	-0.770676	-0.582665	-0.55289	-0.460829	-0.246232	-0.0183776	0.00990787	0.0418168	-0.0159891	0.015716
1.318	-0.766009	-0.581154	-0.554252	-0.46174	-0.246463	-0.0259277	0.0132641	0.0357085	-0.0172023	0.014834
1.319	-0.761154	-0.579555	-0.555081	-0.462002	-0.246131	-0.0337963	0.0154583	0.0262138	-0.0192215	0.0122435
1.32	-0.756203	-0.578137	-0.555307	-0.461267	-0.244897	-0.0414521	0.0166055	0.0134037	-0.021668	0.00808186
1.321	-0.751268	-0.576924	-0.555013	-0.459444	-0.242748	-0.0486335	0.0169809	-0.00204343	-0.0241962	0.00277501
1.322	-0.746547	-0.575637	-0.554362	-0.456674	-0.240112	-0.0551799	0.0167193	-0.0192415	-0.026479	-0.00303284
1.323	-0.742272	-0.573946	-0.553401	-0.453163	-0.237598	-0.0607994	0.0156779	-0.0372393	-0.0281451	-0.00883364
1.324	-0.738622	-0.571708	-0.551972	-0.449228	-0.235824	-0.0651688	0.013814	-0.0550313	-0.028879	-0.0144376
1.325	-0.735555	-0.569072	-0.549884	-0.445274	-0.235334	-0.0680986	0.0115949	-0.0717866	-0.0286142	-0.0195778
1.326	-0.73281	-0.566311	-0.546933	-0.44155	-0.23639	-0.0695105	0.00968236	-0.0869619	-0.0276258	-0.0234608
1.327	-0.730159	-0.563585	-0.542914	-0.438138	-0.238808	-0.0695127	0.00841318	-0.100089	-0.0262286	-0.024869
1.328	-0.727598	-0.56082	-0.538018	-0.435113	-0.242072	-0.0685115	0.00783534	-0.110553	-0.0244378	-0.0225213
1.329	-0.725231	-0.557784	-0.532999	-0.432683	-0.245657	-0.0670586	0.00794997	-0.117736	-0.0221823	-0.0156766
1.33	-0.723044	-0.554353	-0.528602	-0.431147	-0.249248	-0.0656273	0.00870967	-0.121475	-0.019543	-0.00498585
1.331	-0.720844	-0.550635	-0.525176	-0.430602	-0.252793	-0.0645438	0.00998098	-0.12224	-0.0166796	0.00750767
1.332	-0.718404	-0.546852	-0.522819	-0.430887	-0.256483	-0.0638935	0.0115206	-0.120748	-0.0139619	0.0198741
1.333	-0.715557	-0.543282	-0.521365	-0.43179	-0.260589	-0.0634202	0.0128503	-0.117584	-0.0120104	0.0318322
1.334	-0.712186	-0.540276	-0.520445	-0.433034	-0.265122	-0.0626902	0.0133844	-0.113028	-0.0112042	0.0444134
1.335	-0.708314	-0.538096	-0.51979	-0.434288	-0.269674	-0.0614321	0.0127697	-0.106995	-0.0114728	0.0586546
1.336	-0.704113	-0.536728	-0.519241	-0.435395	-0.273683	-0.0597347	0.0111202	-0.0992763	-0.0127826	0.0751332
1.337	-0.699777	-0.535963	-0.518724	-0.436441	-0.27685	-0.0579506	0.00892524	-0.0899939	-0.0154213	0.0940562
1.338	-0.695292	-0.535605	-0.518274	-0.437524	-0.27918	-0.0564128	0.00649598	-0.0796716	-0.0196414	0.115153
1.339	-0.69039	-0.535458	-0.517944	-0.438601	-0.280695	-0.0553674	0.00373128	-0.0688644	-0.0252145	0.13721
1.34	-0.685027	-0.535246	-0.517657	-0.439636	-0.281377	-0.0549917	0.000531641	-0.0578659	-0.0313937	0.157803
1.341	-0.679608	-0.534728	-0.517068	-0.440639	-0.281447	-0.0551472	-0.00280157	-0.0467328	-0.0372943	0.174014
1.342	-0.674721	-0.533892	-0.51575	-0.441342	-0.281346	-0.0553564	-0.00551425	-0.0354394	-0.0423355	0.183277
1.343	-0.67089	-0.53292	-0.513633	-0.441209	-0.281173	-0.0552018	-0.00679762	-0.0238123	-0.0464508	0.18354
1.344	-0.668307	-0.531952	-0.510976	-0.439959	-0.280354	-0.0545986	-0.00629934	-0.0114535	-0.0502064	0.17361
1.345	-0.666792	-0.531027	-0.507973	-0.437864	-0.278288	-0.0537278	-0.00431996	0.00199892	-0.0544375	0.154113
1.346	-0.666046	-0.530198	-0.504615	-0.435315	-0.2751	-0.0529116	-0.00161936	0.0166659	-0.0592118	0.128117
1.347	-0.665814	-0.529502	-0.501008	-0.432312	-0.271323	-0.052418	0.00124938	0.0324144	-0.0635732	0.100031
1.348	-0.665884	-0.52881	-0.497588	-0.428719	-0.267305	-0.0522062	0.00443448	0.0488143	-0.0665758	0.0737914
1.349	-0.666021	-0.527842	-0.494834	-0.424565	-0.263256	-0.0521585	0.00831552	0.0650982	-0.0679742	0.0523723
1.35	-0.665956	-0.526301	-0.493013	-0.419822	-0.259433	-0.0523835	0.0127224	0.0802156	-0.0679874	0.0381856
1.351	-0.665453	-0.523995	-0.492138	-0.414312	-0.256229	-0.0529263	0.0168044	0.0930855	-0.0671328	0.0329687
1.352	-0.664404	-0.52093	-0.491963	-0.407885	-0.254035	-0.0535305	0.0192865	0.102827	-0.0661621	0.0369384
1.353	-0.662782	-0.517363	-0.492058	-0.400705	-0.252975	-0.0537934	0.0188435	0.108799	-0.0657052	0.0483699
1.354	-0.660563	-0.5137	-0.491992	-0.393335	-0.252862	-0.0533526	0.0147685	0.110718	-0.0660721	0.0647204
1.355	-0.657849	-0.510252	-0.49161	-0.386384	-0.253191	-0.0520132	0.007266	0.10877	-0.0673302	0.0838569
1.356	-0.654886	-0.507065	-0.490953	-0.380329	-0.25339	-0.0498606	-0.00303752	0.10344	-0.0693772	0.103515
1.357	-0.651856	-0.504097	-0.489895	-0.375718	-0.253263	-0.0472511	-0.0154285	0.0953213	-0.0719789	0.12059
1.358	-0.648825	-0.501398	-0.48818	-0.372982	-0.252904	-0.0446256	-0.0288996	0.0851934	-0.0747023	0.131917
1.359	-0.645801	-0.498885	-0.485781	-0.372043	-0.252274	-0.0424369	-0.042191	0.0739997	-0.0769713	0.135176
1.36	-0.642729	-0.496386	-0.482895	-0.372527	-0.25107	-0.041106	-0.0542525	0.0624345	-0.0783997	0.129255
1.361	-0.639598	-0.493961	-0.479677	-0.374232	-0.249035	-0.0407573	-0.0644447	0.050772	-0.0789248	0.114404
1.362	-0.636458	-0.491792	-0.476227	-0.377098	-0.246344	-0.0412332	-0.0724613	0.039139	-0.0786488	0.09212
1.363	-0.633349	-0.489906	-0.472755	-0.380825	-0.243523	-0.0424566	-0.0783283	0.0276913	-0.0776812	0.0648632
1.364	-0.630379	-0.488117	-0.469566	-0.384773	-0.241116	-0.0445678	-0.0823311	0.0166194	-0.0762145	0.0355059
1.365	-0.627624	-0.486088	-0.466923	-0.388219	-0.239574	-0.0476351	-0.0848614	0.00603494	-0.0747737	0.00680648
1.366	-0.624917	-0.483565	-0.464936	-0.390659	-0.239168	-0.0513878	-0.0863744	-0.00413297	-0.0740297	-0.0189693
1.367	-0.622013	-0.480536	-0.463586	-0.392002	-0.239915	-0.0554138	-0.0874361	-0.0139936	-0.0742667	-0.0405379
1.368	-0.618911	-0.477154	-0.462753	-0.392504	-0.241694	-0.0593491	-0.0886532	-0.0236838	-0.0752949	-0.0576857
1.369	-0.615895	-0.473632	-0.462163	-0.392662	-0.244274	-0.0626696	-0.0904914	-0.0335028	-0.0768018	-0.0707375
1.37	-0.613292	-0.470198	-0.461526	-0.392951	-0.24725	-0.0646227	-0.0932198	-0.0438117	-0.0784772	-0.0800195
1.371	-0.611214	-0.467062	-0.460846	-0.393369	-0.250047	-0.0647806	-0.0969572	-0.054815	-0.0798988	-0.0856549
1.372	-0.609507	-0.464404	-0.46039	-0.393444	-0.252066	-0.0634974	-0.101585	-0.0662729	-0.0806588	-0.0876013
1.373	-0.607874	-0.462364	-0.460273	-0.392681	-0.252999	-0.061577	-0.106583	-0.0776274	-0.0802754	-0.0859707
1.374	-0.606057	-0.461022	-0.460302	-0.390793	-0.252913	-0.0597547	-0.11121	-0.0886351	-0.077954	-0.0814496
1.375	-0.603996	-0.460391	-0.460204	-0.387736	-0.251815	-0.0585209	-0.114875	-0.0995044	-0.07331	-0.0752634
1.376	-0.601799	-0.46033	-0.45972	-0.383689	-0.249077	-0.0582373	-0.117281	-0.110486	-0.0671205	-0.0687974
1.377	-0.599593	-0.460512	-0.4587	-0.378848	-0.24331	-0.0591519	-0.11841	-0.121598	-0.0608304	-0.0632866
1.378	-0.597512	-0.460591	-0.457288	-0.373179	-0.233212	-0.0612361	-0.118455	-0.132649	-0.0556594	-0.0595643
1.379	-0.59573	-0.460368	-0.455795	-0.366535	-0.218769	-0.0642062	-0.117795	-0.14336	-0.0521702	-0.0579928
1.38	-0.594306	-0.459789	-0.454427	-0.359177	-0.201605	-0.0676377	-0.116935	-0.153478	-0.0504611	-0.0585744
1.381	-0.593054	-0.458787	-0.453156	-0.351741	-0.184322	-0.071034	-0.116253	-0.162919	-0.0505759	-0.0609215
1.382	-0.5917	-0.457207	-0.451798	-0.344432	-0.169436	-0.0738241	-0.115728	-0.171723	-0.0526034	-0.0641774
1.383	-0.590102	-0.454983	-0.450179	-0.336586	-0.158669	-0.0753669	-0.115022	-0.179757	-0.0564668	-0.0673449
1.384	-0.5883	-0.452335	-0.448224	-0.32744	-0.152705	-0.0751804	-0.113878	-0.186524	-0.0616037	-0.0697839
1.385	-0.586327	-0.44969	-0.445976	-0.317241	-0.151236	-0.0730903	-0.11219	-0.191398	-0.0669846	-0.071092
1.386	-0.584102	-0.447349	-0.443577	-0.307264	-0.153506	-0.0691357	-0.109739	-0.194019	-0.0715645	-0.0707602
1.387	-0.581618	-0.445329	-0.441257	-0.299077	-0.158712	-0.063658	-0.106349	-0.194483	-0.074671	-0.0685025
1.388	-0.578743	-0.443436	-0.439195	-0.294108	-0.165802	-0.0573744	-0.102271	-0.193258	-0.0760692	-0.0646671
1.389	-0.574856	-0.441461	-0.437445	-0.293427	-0.173532	-0.0510277	-0.0979866	-0.191039	-0.0758356	-0.0599771
1.39	-0.56935	-0.439457	-0.435983	-0.297432	-0.181005	-0.0450916	-0.0938225	-0.188588	-0.074229	-0.0550081
1.391	-0.562298	-0.437646	-0.434598	-0.30571	-0.187985	-0.0399184	-0.0900281	-0.186627	-0.0716389	-0.0499826
1.392	-0.554417	-0.436085	-0.432865	-0.317032	-0.194697	-0.0357611	-0.0869329	-0.185819	-0.0685981	-0.0449551
1.393	-0.546598	-0.434736	-0.430462	-0.329613	-0.201243	-0.0324034	-0.0848711	-0.186482	-0.0657429	-0.0398941
1.394	-0.539558	-0.433652	-0.427473	-0.341813	-0.207154	-0.0293201	-0.0840246	-0.188261	-0.0635934	-0.0346277
1.395	-0.533795	-0.432777	-0.424266	-0.352563	-0.211595	-0.0264802	-0.0842428	-0.190358	-0.0622811	-0.0290445
1.396	-0.52947	-0.431789	-0.421254	-0.361193	-0.213929	-0.0244026	-0.084939	-0.191983	-0.061528	-0.0233348
1.397	-0.526298	-0.430388	-0.418782	-0.367441	-0.214058	-0.0234084	-0.0850112	-0.192703	-0.0608291	-0.0180744
1.398	-0.523768	-0.4286	-0.417029	-0.371553	-0.212437	-0.0234716	-0.0828002	-0.192645	-0.0598027	-0.0139817
1.399	-0.521466	-0.426608	-0.415938	-0.373996	-0.209905	-0.0245784	-0.0764454	-0.1922	-0.0586644	-0.0113173
1.4	-0.519172	-0.424503	-0.415222	-0.37514	-0.207372	-0.0266807	-0.0647251	-0.191746	-0.0580284	-0.00983441
1.401	-0.516759	-0.422291	-0.414505	-0.375035	-0.205649	-0.0294554	-0.0481834	-0.191595	-0.0581831	-0.00935811
1.402	-0.514283	-0.41998	-0.413569	-0.373381	-0.205277	-0.0322914	-0.0293766	-0.191728	-0.0590316	-0.00988108
1.403	-0.511961	-0.417746	-0.412301	-0.369928	-0.206209	-0.0345089	-0.0112295	-0.191651	-0.0603241	-0.0112416
1.404	-0.509883	-0.415946	-0.410612	-0.364863	-0.207869	-0.0355936	0.00451758	-0.190659	-0.0616017	-0.0131721
1.405	-0.508044	-0.414832	-0.408566	-0.358833	-0.209646	-0.0352554	0.0171997	-0.188238	-0.0622973	-0.0156894
1.406	-0.506477	-0.41446	-0.406298	-0.352606	-0.21109	-0.033569	0.0266156	-0.184274	-0.0619866	-0.019156
1.407	-0.505197	-0.414714	-0.403884	-0.346721	-0.211771	-0.0311348	0.0326989	-0.178632	-0.060539	-0.023645
1.408	-0.504262	-0.41524	-0.401424	-0.341282	-0.211541	-0.0289093	0.0355161	-0.170617	-0.0579203	-0.0285067
1.409	-0.503776	-0.415628	-0.399017	-0.33575	-0.210698	-0.0277981	0.0352852	-0.159471	-0.0539653	-0.0330626
1.41	-0.503713	-0.415597	-0.396673	-0.329033	-0.209605	-0.028354	0.0321952	-0.145178	-0.0489171	-0.0372971
1.411	-0.50395	-0.414936	-0.394445	-0.320327	-0.208439	-0.0307261	0.0264529	-0.12839	-0.0438857	-0.0415126
1.412	-0.504397	-0.413597	-0.392365	-0.310135	-0.206994	-0.0346197	0.0185446	-0.110011	-0.0402037	-0.0459519
1.413	-0.504986	-0.411793	-0.390272	-0.300125	-0.204444	-0.0394059	0.00912301	-0.0910344	-0.0386351	-0.050796
1.414	-0.505622	-0.409767	-0.388019	-0.291944	-0.199489	-0.0443928	-0.0013965	-0.0721566	-0.0393527	-0.0559592
1.415	-0.506124	-0.407644	-0.385616	-0.286608	-0.19134	-0.0488631	-0.0127112	-0.0529182	-0.0422047	-0.0609714
1.416	-0.5063	-0.405556	-0.383227	-0.284625	-0.181014	-0.0522127	-0.0241982	-0.0315681	-0.0467603	-0.0653053
1.417	-0.506086	-0.4037	-0.381224	-0.285917	-0.170746	-0.0542749	-0.0349522	-0.00610438	-0.0523664	-0.0687381
1.418	-0.505482	-0.402183	-0.379963	-0.28991	-0.161992	-0.0553672	-0.0439865	0.0244638	-0.0581898	-0.0711708
1.419	-0.504564	-0.400953	-0.379498	-0.296077	-0.155019	-0.0560779	-0.0504514	0.0591083	-0.0630911	-0.0722267
1.42	-0.50351	-0.399935	-0.379734	-0.30413	-0.14982	-0.0568989	-0.0541689	0.0945963	-0.0659431	-0.0715969
1.421	-0.50248	-0.39911	-0.380577	-0.313527	-0.146726	-0.0579584	-0.055823	0.126451	-0.0664817	-0.0696285
1.422	-0.501559	-0.398405	-0.381801	-0.323233	-0.146469	-0.0591312	-0.0564236	0.150517	-0.0653716	-0.0671273
1.423	-0.500773	-0.397682	-0.38296	-0.332258	-0.149605	-0.0602973	-0.0568135	0.164177	-0.0634247	-0.0648917
1.424	-0.50007	-0.396829	-0.383586	-0.339963	-0.155833	-0.0614071	-0.0575563	0.166543	-0.0613234	-0.0635178
1.425	-0.499398	-0.395777	-0.383456	-0.345859	-0.164088	-0.0623462	-0.0589942	0.158087	-0.0596665	-0.0633123
1.426	-0.498814	-0.394542	-0.38258	-0.349705	-0.173133	-0.0628036	-0.061212	0.140399	-0.0587953	-0.0641748
1.427	-0.498414	-0.393201	-0.381061	-0.351625	-0.181937	-0.0623139	-0.0639391	0.116079	-0.0587394	-0.0655482
1.428	-0.49818	-0.39178	-0.379155	-0.351844	-0.189677	-0.0604878	-0.0667265	0.0883776	-0.0592395	-0.0666626
1.429	-0.498028	-0.390271	-0.377262	-0.350646	-0.195824	-0.0572595	-0.0691073	0.0604958	-0.0597871	-0.0668368
1.43	-0.497857	-0.388723	-0.375705	-0.348435	-0.200162	-0.0530017	-0.0706	0.0350547	-0.0598451	-0.0655873
1.431	-0.497505	-0.387308	-0.374528	-0.345591	-0.202749	-0.0484864	-0.0708121	0.0139018	-0.0589965	-0.0627559
1.432	-0.496846	-0.386286	-0.373579	-0.342458	-0.203978	-0.0446032	-0.0695695	-0.0019788	-0.0570139	-0.0586517
1.433	-0.495875	-0.385801	-0.372717	-0.339357	-0.204415	-0.0418895	-0.0670193	-0.0125241	-0.0541336	-0.0538906
1.434	-0.494593	-0.385763	-0.371883	-0.336431	-0.20451	-0.04023	-0.0635821	-0.0184893	-0.0511604	-0.0490288
1.435	-0.492897	-0.385968	-0.371089	-0.333674	-0.204423	-0.0390314	-0.0597733	-0.0210909	-0.0490691	-0.0444478
1.436	-0.490693	-0.386229	-0.370372	-0.331253	-0.20399	-0.0376706	-0.0560092	-0.0214952	-0.0485	-0.0404264
1.437	-0.48804	-0.386481	-0.369773	-0.329479	-0.202948	-0.0358324	-0.0523601	-0.020491	-0.0497052	-0.0370127
1.438	-0.485138	-0.386727	-0.369326	-0.328416	-0.20131	-0.0335632	-0.0481348	-0.0186193	-0.0528617	-0.0338121
1.439	-0.482246	-0.386927	-0.368868	-0.327753	-0.199472	-0.0311351	-0.0418527	-0.016446	-0.0579788	-0.0301359
1.44	-0.479592	-0.387069	-0.368101	-0.327152	-0.197847	-0.0289402	-0.0326467	-0.0145001	-0.0645122	-0.0255604
1.441	-0.477254	-0.387273	-0.366966	-0.326468	-0.196428	-0.0273582	-0.0215677	-0.0129778	-0.0716121	-0.0203199
1.442	-0.475185	-0.387598	-0.365727	-0.325611	-0.194834	-0.0266891	-0.010777	-0.0117771	-0.0788364	-0.01509
1.443	-0.473379	-0.387839	-0.364726	-0.32437	-0.19281	-0.0272803	-0.00201617	-0.0109019	-0.0860316	-0.0105308
1.444	-0.471855	-0.387584	-0.364141	-0.322562	-0.190443	-0.0294432	0.00388066	-0.0106264	-0.0925615	-0.00718615
1.445	-0.470471	-0.386288	-0.363956	-0.320284	-0.187782	-0.0331777	0.00666742	-0.01121	-0.0974095	-0.00562843
1.446	-0.468992	-0.383527	-0.364082	-0.317818	-0.184372	-0.0382255	0.00652344	-0.0125581	-0.0997243	-0.00635618
1.447	-0.4673	-0.379387	-0.364368	-0.315363	-0.179267	-0.0442811	0.00451852	-0.0142573	-0.0990749	-0.00959034
1.448	-0.465404	-0.374397	-0.364625	-0.312982	-0.171531	-0.0510199	0.00287793	-0.0159602	-0.0954582	-0.0153052
1.449	-0.463301	-0.369126	-0.364702	-0.310667	-0.161217	-0.0580762	0.00413332	-0.0175157	-0.0889173	-0.0233007
1.45	-0.460934	-0.364046	-0.364495	-0.308342	-0.150109	-0.0650197	0.00962579	-0.0187425	-0.0795037	-0.0330256
1.451	-0.458361	-0.359607	-0.363937	-0.305837	-0.140812	-0.0712945	0.0184584	-0.0193827	-0.0677324	-0.043455
1.452	-0.455812	-0.356186	-0.363036	-0.302951	-0.135118	-0.0763097	0.0279077	-0.0192672	-0.0546194	-0.0535108
1.453	-0.453423	-0.354	-0.361861	-0.299603	-0.133399	-0.0797747	0.0349484	-0.0183885	-0.0411976	-0.0624294
1.454	-0.451093	-0.35294	-0.360428	-0.295917	-0.134837	-0.0818223	0.037597	-0.0168917	-0.0282586	-0.0696217
1.455	-0.448762	-0.352531	-0.358742	-0.291926	-0.138264	-0.0827148	0.0356241	-0.0151604	-0.0165509	-0.0746113
1.456	-0.446596	-0.352392	-0.356977	-0.287347	-0.143076	-0.082712	0.0302889	-0.0137694	-0.00682917	-0.0772559
1.457	-0.444769	-0.35249	-0.355268	-0.28204	-0.149134	-0.082239	0.0231928	-0.0131549	0.000432797	-0.0778599
1.458	-0.443238	-0.352816	-0.353461	-0.276492	-0.156088	-0.0818916	0.0154384	-0.0134587	0.00520888	-0.0768649
1.459	-0.441863	-0.353229	-0.351283	-0.271677	-0.163279	-0.0822329	0.0075485	-0.0147029	0.0076763	-0.0745562
1.46	-0.440643	-0.353617	-0.348576	-0.268632	-0.170147	-0.083554	-0.0003962	-0.0169319	0.00782152	-0.0710355
1.461	-0.439724	-0.353878	-0.345425	-0.267947	-0.176468	-0.0857879	-0.00841967	-0.0201437	0.00544854	-0.0660371
1.462	-0.439196	-0.35381	-0.342107	-0.269409	-0.182303	-0.0886762	-0.0162679	-0.0242263	0.000607525	-0.0588633
1.463	-0.439017	-0.353193	-0.338819	-0.272257	-0.187754	-0.0918894	-0.0235106	-0.0289081	-0.00627419	-0.0488087
1.464	-0.439099	-0.351902	-0.335572	-0.275802	-0.192639	-0.0950119	-0.0297627	-0.033641	-0.0147635	-0.0357722
1.465	-0.439298	-0.349961	-0.332504	-0.279724	-0.196399	-0.0975667	-0.0347115	-0.0378545	-0.0244713	-0.0204707
1.466	-0.439421	-0.34758	-0.329952	-0.283904	-0.198525	-0.0991587	-0.0382187	-0.0413685	-0.034827	-0.00407884
1.467	-0.439287	-0.345028	-0.328148	-0.288196	-0.198978	-0.0996889	-0.0403419	-0.0442072	-0.0452844	0.0121408
1.468	-0.4387	-0.342409	-0.32724	-0.292417	-0.198006	-0.0993757	-0.041131	-0.0463534	-0.055415	0.027038
1.469	-0.437485	-0.339733	-0.327387	-0.296366	-0.195914	-0.0985745	-0.0406671	-0.0480776	-0.064726	0.0397302
1.47	-0.435421	-0.337199	-0.328418	-0.29976	-0.193157	-0.0975439	-0.039424	-0.0500909	-0.0727872	0.0495071
1.471	-0.432229	-0.335097	-0.329749	-0.302233	-0.190169	-0.0962586	-0.0382122	-0.0530848	-0.0792884	0.0556179
1.472	-0.427883	-0.333578	-0.33079	-0.303451	-0.186944	-0.0943446	-0.0376605	-0.0572995	-0.0839653	0.0574066
1.473	-0.422783	-0.332697	-0.331242	-0.303241	-0.182949	-0.0912002	-0.0379866	-0.0626225	-0.0867815	0.0546996
1.474	-0.417655	-0.332494	-0.331098	-0.301669	-0.177659	-0.0864674	-0.0391139	-0.0688726	-0.0878183	0.048269
1.475	-0.413307	-0.332934	-0.330538	-0.299031	-0.17116	-0.0803754	-0.0406535	-0.0755766	-0.086936	0.0400554
1.476	-0.41034	-0.333784	-0.329759	-0.295708	-0.16412	-0.0735034	-0.0418567	-0.0817822	-0.0839407	0.0322679
1.477	-0.408984	-0.334663	-0.328784	-0.291997	-0.157243	-0.066476	-0.0419881	-0.0866439	-0.0789172	0.0261978
1.478	-0.409084	-0.3353	-0.327599	-0.288086	-0.150818	-0.0599384	-0.0406945	-0.0898174	-0.0723745	0.0221199
1.479	-0.410315	-0.335651	-0.326404	-0.284196	-0.144756	-0.05453	-0.0378439	-0.0910885	-0.0651539	0.0197114
1.48	-0.41233	-0.335798	-0.325504	-0.280622	-0.139032	-0.0506862	-0.0333946	-0.0901164	-0.0580727	0.018439
1.481	-0.414659	-0.335804	-0.325087	-0.277607	-0.133584	-0.0484686	-0.0276026	-0.0867971	-0.0517924	0.0178329
1.482	-0.416786	-0.335595	-0.325156	-0.275238	-0.127965	-0.047735	-0.0211592	-0.081609	-0.0468835	0.017412
1.483	-0.418319	-0.335031	-0.325542	-0.273558	-0.122017	-0.0483632	-0.0150498	-0.0753782	-0.0436965	0.0166432
1.484	-0.418956	-0.334097	-0.32606	-0.272716	-0.116378	-0.0500606	-0.0101908	-0.0688515	-0.0423191	0.0152077
1.485	-0.41847	-0.332856	-0.326522	-0.272682	-0.111537	-0.0522186	-0.00718353	-0.0625138	-0.0427407	0.0130886
1.486	-0.416846	-0.33127	-0.326658	-0.273033	-0.106359	-0.0542311	-0.00631966	-0.0566748	-0.0448476	0.0103999
1.487	-0.414395	-0.329245	-0.326253	-0.273178	-0.0977743	-0.0558523	-0.00750384	-0.0515562	-0.04827	0.00728943
1.488	-0.41161	-0.326788	-0.325288	-0.272421	-0.0832876	-0.0570661	-0.0102231	-0.047157	-0.0525286	0.00389113
1.489	-0.408852	-0.324081	-0.323908	-0.269904	-0.0641168	-0.0577244	-0.0137978	-0.0430502	-0.0573378	0.000323671
1.49	-0.406207	-0.321461	-0.322253	-0.265087	-0.0447916	-0.0576533	-0.0175096	-0.0382775	-0.0624191	-0.00323323
1.491	-0.403663	-0.319261	-0.320244	-0.258373	-0.0301738	-0.0570409	-0.0205429	-0.0313888	-0.0671669	-0.00634812
1.492	-0.401245	-0.31757	-0.317543	-0.251036	-0.0234631	-0.0562812	-0.0221859	-0.0208944	-0.0709209	-0.00833945
1.493	-0.399038	-0.316306	-0.313909	-0.244382	-0.0257763	-0.0554	-0.0221206	-0.0062953	-0.0733875	-0.00889446
1.494	-0.397152	-0.315395	-0.309623	-0.239132	-0.0363161	-0.054178	-0.0202287	0.0111065	-0.0745343	-0.00842625
1.495	-0.395688	-0.314645	-0.305241	-0.235627	-0.0529836	-0.0527946	-0.0162904	0.0284635	-0.0743588	-0.00752123
1.496	-0.394675	-0.313785	-0.301184	-0.234092	-0.0733794	-0.0516905	-0.0102202	0.0425794	-0.0728389	-0.00640882
1.497	-0.394023	-0.312673	-0.297807	-0.234477	-0.0952516	-0.0509924	-0.00224903	0.0512834	-0.0698987	-0.0050507
1.498	-0.393579	-0.311137	-0.295422	-0.236406	-0.116511	-0.0505888	0.00748724	0.054022	-0.0656724	-0.0033877
1.499	-0.393263	-0.308879	-0.294119	-0.239481	-0.135566	-0.0504304	0.0196342	0.0518284	-0.0605879	-0.00129816
1.5	-0.393078	-0.305756	-0.29377	-0.243435	-0.151458	-0.05051	0.0357418	0.0469427	-0.0550028	0.00140195
1.501	-0.392997	-0.301987	-0.294235	-0.247882	-0.163697	-0.0508227	0.0573184	0.0416977	-0.0490904	0.00466193
1.502	-0.392945	-0.297972	-0.295404	-0.252189	-0.17227	-0.051309	0.0843467	0.037678	-0.0428028	0.00807116
1.503	-0.392837	-0.294015	-0.297052	-0.255795	-0.177667	-0.051873	0.114104	0.0356218	-0.0359786	0.0111865
1.504	-0.392536	-0.290282	-0.298816	-0.258521	-0.180607	-0.0524916	0.141667	0.0354018	-0.0287514	0.0139461
1.505	-0.391867	-0.286902	-0.300409	-0.260418	-0.181606	-0.0531348	0.162032	0.0364127	-0.021691	0.0165488
1.506	-0.390723	-0.284008	-0.301795	-0.261446	-0.180997	-0.0538421	0.171923	0.038143	-0.0155447	0.0189833
1.507	-0.389169	-0.281709	-0.303019	-0.261657	-0.179269	-0.0548568	0.170492	0.0402869	-0.010829	0.0211398
1.508	-0.387377	-0.280077	-0.303986	-0.261448	-0.176846	-0.0562989	0.159001	0.0425318	-0.00762452	0.0232796
1.509	-0.385491	-0.279127	-0.304441	-0.261233	-0.173785	-0.0578864	0.139849	0.04438	-0.00578558	0.0259671
1.51	-0.383589	-0.278817	-0.304121	-0.261019	-0.170274	-0.0591211	0.115821	0.0453484	-0.0052336	0.0295916
1.511	-0.38167	-0.279052	-0.303001	-0.260521	-0.166963	-0.0596462	0.0896775	0.0453498	-0.0058547	0.0340723
1.512	-0.379635	-0.279651	-0.301281	-0.259562	-0.164358	-0.0595508	0.0639125	0.0447599	-0.00722745	0.0389476
1.513	-0.377458	-0.280392	-0.299134	-0.258236	-0.162354	-0.0592639	0.0406283	0.0440825	-0.00872494	0.0436322
1.514	-0.375307	-0.281168	-0.296672	-0.256788	-0.160693	-0.0591197	0.0212815	0.0435133	-0.0099547	0.0476614
1.515	-0.373341	-0.282015	-0.294045	-0.255471	-0.159561	-0.0591658	0.00629947	0.0428782	-0.0110773	0.0507647
1.516	-0.371523	-0.282929	-0.291538	-0.25436	-0.159476	-0.0592902	-0.0048596	0.0420086	-0.0125912	0.052692
1.517	-0.369634	-0.283772	-0.289563	-0.253201	-0.160898	-0.059464	-0.0130949	0.0411802	-0.0148325	0.053188
1.518	-0.367535	-0.28443	-0.288384	-0.251718	-0.163982	-0.0598752	-0.0191435	0.0410077	-0.0177194	0.0522464
1.519	-0.365428	-0.284948	-0.287934	-0.250057	-0.168451	-0.0607709	-0.023626	0.0416486	-0.0209065	0.0502604
1.52	-0.36363	-0.285442	-0.287988	-0.248609	-0.173793	-0.062174	-0.0273672	0.0423904	-0.0242324	0.0477813
1.521	-0.362245	-0.286007	-0.288427	-0.247576	-0.179499	-0.0639222	-0.0312883	0.0421475	-0.0278736	0.0451117
1.522	-0.361171	-0.286636	-0.289339	-0.246992	-0.184764	-0.0660155	-0.035971	0.0400744	-0.0319188	0.0422345
1.523	-0.360237	-0.287148	-0.290804	-0.247058	-0.188044	-0.068728	-0.0414655	0.0358611	-0.0360455	0.0390838
1.524	-0.359347	-0.287288	-0.292687	-0.248154	-0.187256	-0.072314	-0.0473845	0.0297471	-0.0398093	0.0357825
1.525	-0.3586	-0.286879	-0.294619	-0.250446	-0.180931	-0.076756	-0.0531613	0.0222321	-0.0430904	0.0327882
1.526	-0.358198	-0.285876	-0.295985	-0.253646	-0.169707	-0.0817967	-0.0582615	0.0138083	-0.0461648	0.0308156
1.527	-0.358303	-0.284333	-0.296161	-0.25712	-0.156507	-0.0869134	-0.062322	0.00504088	-0.0494499	0.0304924
1.528	-0.358936	-0.2823	-0.29489	-0.260144	-0.144719	-0.0913149	-0.0652141	-0.0032838	-0.0532034	0.032226
1.529	-0.359884	-0.279807	-0.292306	-0.262082	-0.136154	-0.0942795	-0.066812	-0.0102483	-0.0573458	0.0361815
1.53	-0.360733	-0.276952	-0.288789	-0.262462	-0.130658	-0.0954482	-0.0667542	-0.0149656	-0.0614464	0.0422068
1.531	-0.361154	-0.273889	-0.284746	-0.261046	-0.127172	-0.0947751	-0.0645376	-0.0166846	-0.0648801	0.0499906
1.532	-0.361057	-0.270767	-0.280391	-0.257715	-0.124916	-0.0923442	-0.0598934	-0.0150634	-0.0671326	0.0591826
1.533	-0.360423	-0.267749	-0.275908	-0.252148	-0.123658	-0.0882613	-0.0531432	-0.0103601	-0.0680336	0.0692263
1.534	-0.359166	-0.264995	-0.271598	-0.243866	-0.123317	-0.0826671	-0.0450902	-0.00300003	-0.06765	0.0793749
1.535	-0.357355	-0.26255	-0.267736	-0.233009	-0.123718	-0.0759332	-0.0365576	0.00679689	-0.0660444	0.0890811
1.536	-0.355345	-0.260419	-0.264455	-0.221081	-0.124611	-0.0687552	-0.0280464	0.0186498	-0.0632675	0.0982392
1.537	-0.353476	-0.2587	-0.261723	-0.210475	-0.125888	-0.0617407	-0.019737	0.0317414	-0.0595832	0.107112
1.538	-0.351809	-0.257516	-0.259506	-0.203121	-0.12766	-0.0551135	-0.0117579	0.0452327	-0.0555466	0.117065
1.539	-0.350182	-0.256936	-0.257885	-0.199808	-0.129974	-0.0491274	-0.00430701	0.0588866	-0.0516973	0.130916
1.54	-0.348393	-0.256977	-0.25698	-0.200504	-0.132612	-0.0443723	0.00246436	0.0733092	-0.0482426	0.150211
1.541	-0.346405	-0.257591	-0.256894	-0.204682	-0.135133	-0.0413943	0.00856529	0.0895296	-0.0451829	0.172979
1.542	-0.344375	-0.258612	-0.257648	-0.211348	-0.137124	-0.0403579	0.0141674	0.107857	-0.0428317	0.195253
1.543	-0.342587	-0.259798	-0.259163	-0.219347	-0.138388	-0.0412272	0.019351	0.126647	-0.0418242	0.213138
1.544	-0.341403	-0.260991	-0.261311	-0.227788	-0.138979	-0.0439388	0.0239695	0.142411	-0.0423591	0.223651
1.545	-0.341052	-0.262149	-0.263848	-0.236103	-0.139248	-0.0482918	0.0279584	0.151434	-0.0440486	0.225024
1.546	-0.341454	-0.263253	-0.266564	-0.2439	-0.139663	-0.0539014	0.0315083	0.15126	-0.0465285	0.21678
1.547	-0.342338	-0.264142	-0.269302	-0.25077	-0.14056	-0.060326	0.0348305	0.141273	-0.0496329	0.19958
1.548	-0.343394	-0.264576	-0.271767	-0.256322	-0.142059	-0.0671866	0.0379724	0.122814	-0.0531581	0.174961
1.549	-0.34429	-0.26455	-0.273741	-0.260466	-0.144064	-0.0742001	0.0410106	0.0987157	-0.0568017	0.145052
1.55	-0.344663	-0.264236	-0.27525	-0.26334	-0.146419	-0.081136	0.0445532	0.0722117	-0.0603395	0.112147
1.551	-0.3442	-0.263685	-0.276369	-0.264998	-0.148996	-0.0877067	0.0499886	0.046204	-0.0637209	0.0783946
1.552	-0.34285	-0.262827	-0.27715	-0.265422	-0.151574	-0.0935858	0.0589072	0.0231793	-0.0668396	0.045631
1.553	-0.340893	-0.261721	-0.277645	-0.264694	-0.153728	-0.0985454	0.0716934	0.00499851	-0.0694691	0.0153269
1.554	-0.338701	-0.260542	-0.277885	-0.262993	-0.154918	-0.102414	0.0862901	-0.00748364	-0.0716048	-0.0113642
1.555	-0.336572	-0.25937	-0.27785	-0.260525	-0.154928	-0.104967	0.0987903	-0.0144683	-0.0735122	-0.033656
1.556	-0.334728	-0.258222	-0.277489	-0.257553	-0.154138	-0.105957	0.105509	-0.0170441	-0.0754226	-0.0512434
1.557	-0.333292	-0.257146	-0.276777	-0.254299	-0.153182	-0.105139	0.104371	-0.0168674	-0.0775066	-0.0642233
1.558	-0.332374	-0.256148	-0.275663	-0.25082	-0.152456	-0.102206	0.0950991	-0.0153943	-0.079931	-0.0729345
1.559	-0.332083	-0.255171	-0.274115	-0.247177	-0.1519	-0.0969221	0.0792297	-0.0133757	-0.0826013	-0.0779047
1.56	-0.332378	-0.254156	-0.272227	-0.243491	-0.151204	-0.0894508	0.0598605	-0.0111505	-0.0851467	-0.079763
1.561	-0.333076	-0.252976	-0.270137	-0.239812	-0.149857	-0.0804611	0.040347	-0.00896744	-0.087328	-0.0791174
1.562	-0.333978	-0.251518	-0.267906	-0.236209	-0.146838	-0.070822	0.0228283	-0.00698537	-0.0891491	-0.0766029
1.563	-0.334895	-0.249782	-0.265564	-0.232818	-0.14077	-0.0611959	0.00808146	-0.00527809	-0.0906777	-0.0728716
1.564	-0.335663	-0.247783	-0.263301	-0.229674	-0.130944	-0.0520388	-0.00368912	-0.0039096	-0.0920571	-0.0684655
1.565	-0.336216	-0.245482	-0.261429	-0.226722	-0.118673	-0.0437717	-0.0124106	-0.00288152	-0.0935177	-0.0639141
1.566	-0.336563	-0.242814	-0.259977	-0.223937	-0.107401	-0.0367273	-0.0182789	-0.00182563	-0.0951634	-0.0597349
1.567	-0.336704	-0.239802	-0.258707	-0.2213	-0.100684	-0.0310334	-0.0217833	4.98e-05	-0.0968753	-0.0563019
1.568	-0.336612	-0.23663	-0.257539	-0.218865	-0.100069	-0.0264971	-0.0234179	0.00328886	-0.0983608	-0.054044
1.569	-0.336213	-0.233571	-0.256552	-0.216766	-0.104823	-0.022596	-0.0236414	0.00783737	-0.0991502	-0.0535375
1.57	-0.335452	-0.230889	-0.255744	-0.214968	-0.112981	-0.0187061	-0.0229639	0.0134657	-0.0987883	-0.0551233
1.571	-0.334415	-0.228748	-0.254994	-0.213226	-0.122451	-0.0143957	-0.0218162	0.0198494	-0.0969492	-0.0586417
1.572	-0.333274	-0.227199	-0.254107	-0.211284	-0.131648	-0.00956233	-0.0205103	0.0263187	-0.0931955	-0.0636471
1.573	-0.332133	-0.226268	-0.25292	-0.209105	-0.139584	-0.00435238	-0.0192819	0.0320419	-0.0871411	-0.0696933
1.574	-0.330958	-0.226006	-0.251477	-0.207124	-0.145485	0.00104006	-0.0181678	0.0364225	-0.0790199	-0.0763137
1.575	-0.329664	-0.226455	-0.250045	-0.205985	-0.148756	0.00642115	-0.0169946	0.0391227	-0.0696042	-0.0829335
1.576	-0.328236	-0.227557	-0.248961	-0.205885	-0.149543	0.0113393	-0.0156648	0.0399458	-0.0596683	-0.0888126
1.577	-0.326719	-0.229154	-0.248443	-0.206451	-0.148648	0.0150005	-0.0142337	0.039025	-0.0499614	-0.0928009
1.578	-0.325145	-0.230976	-0.248404	-0.207032	-0.146804	0.0167493	-0.0126632	0.0369125	-0.0413276	-0.0933486
1.579	-0.323581	-0.23267	-0.248543	-0.20677	-0.144529	0.0165021	-0.0108294	0.0343076	-0.0343711	-0.0891369
1.58	-0.322162	-0.234023	-0.248744	-0.204601	-0.142311	0.0145372	-0.00882201	0.0318198	-0.0292415	-0.0799005
1.581	-0.321026	-0.235033	-0.249243	-0.199677	-0.140398	0.0111765	-0.00702814	0.0298746	-0.0259613	-0.0669658
1.582	-0.320235	-0.235819	-0.250271	-0.19234	-0.138736	0.00685364	-0.00591768	0.0286626	-0.024624	-0.0530257
1.583	-0.319804	-0.236547	-0.251658	-0.184554	-0.137354	0.00208823	-0.0058109	0.0281779	-0.0250668	-0.0410242
1.584	-0.319751	-0.237189	-0.252993	-0.178835	-0.136448	-0.0027838	-0.00684874	0.0282972	-0.0267389	-0.0328177
1.585	-0.31994	-0.237442	-0.253947	-0.176828	-0.136184	-0.00761146	-0.00908294	0.0289482	-0.0291647	-0.028364
1.586	-0.32002	-0.236999	-0.254282	-0.178911	-0.136511	-0.0121974	-0.012387	0.0302531	-0.0322659	-0.0259824
1.587	-0.319761	-0.235706	-0.253853	-0.184464	-0.137074	-0.0161561	-0.0163326	0.032417	-0.0360554	-0.0236725
1.588	-0.319215	-0.233573	-0.252742	-0.192111	-0.137514	-0.0190204	-0.0202811	0.0356008	-0.0403929	-0.0203802
1.589	-0.318555	-0.23086	-0.251255	-0.200275	-0.137683	-0.0206081	-0.0236236	0.039967	-0.0451362	-0.0162448
1.59	-0.31794	-0.227987	-0.249633	-0.207914	-0.137501	-0.0211274	-0.0259223	0.0455849	-0.0501079	-0.0119485
1.591	-0.317426	-0.22534	-0.24784	-0.214584	-0.136883	-0.0209392	-0.0268616	0.0522074	-0.0549161	-0.00779471
1.592	-0.316931	-0.223211	-0.245718	-0.220071	-0.135726	-0.0204607	-0.0262654	0.0593806	-0.0591188	-0.00335371
1.593	-0.316341	-0.221759	-0.243174	-0.224233	-0.133953	-0.0201415	-0.0240502	0.0667629	-0.062502	0.00176426
1.594	-0.315605	-0.221013	-0.240203	-0.227044	-0.131463	-0.0203284	-0.0201532	0.0743239	-0.0650687	0.00718741
1.595	-0.31471	-0.220928	-0.236929	-0.228609	-0.128002	-0.021104	-0.014703	0.0829557	-0.0668895	0.0121966
1.596	-0.313673	-0.221381	-0.233694	-0.229118	-0.123538	-0.0222892	-0.00798563	0.0949521	-0.0680309	0.0162123
1.597	-0.312508	-0.2221	-0.230924	-0.228739	-0.118679	-0.0236841	-0.00011425	0.112223	-0.0686154	0.018834
1.598	-0.311221	-0.222691	-0.228999	-0.227608	-0.114363	-0.0252913	0.0089596	0.133467	-0.0687735	0.0198797
1.599	-0.309907	-0.222848	-0.228231	-0.225995	-0.111326	-0.0273049	0.0190406	0.154009	-0.0683846	0.0194223
1.6	-0.308697	-0.222482	-0.228663	-0.224284	-0.10983	-0.0297711	0.0295077	0.168291	-0.0672423	0.0177102
1.601	-0.307619	-0.221724	-0.229939	-0.222664	-0.109685	-0.0322934	0.039636	0.172287	-0.0655639	0.0149439
1.602	-0.306631	-0.220851	-0.231577	-0.221112	-0.110429	-0.0343253	0.0489465	0.164507	-0.064038	0.0112483
1.603	-0.305611	-0.220019	-0.233237	-0.219576	-0.111387	-0.0356392	0.0571492	0.145843	-0.0633262	0.0069522
1.604	-0.304332	-0.219158	-0.234635	-0.217951	-0.111109	-0.0363505	0.064019	0.118665	-0.0636653	0.00264759
1.605	-0.302669	-0.218136	-0.235508	-0.215978	-0.106922	-0.0366846	0.0693978	0.0861308	-0.0649505	-0.00122752
1.606	-0.300773	-0.21694	-0.235784	-0.213391	-0.0964467	-0.0368861	0.0731113	0.0518793	-0.066843	-0.00467762
[truncated: 1,393 more rows]

## Sheet: G232D_K_S3_N1
First_Column	100	30	10	3	1	0.3	0.1	0.03	0.01	0.003	0	0
[truncated: 3,000 more rows]

## Sheet: G232D_K_S3_N2
	100	30	10	3	1	0.3	0.1	0.03	0.01	0.003	0
[truncated: 3,000 more rows]

[truncated: 12 more sheets: G232D_Rb_S1_N1, G232D_Rb_S1_N2, G232D_Rb_S2_N1, G232D_Rb_S2_N2, G232D_NH4_S1_N1, G232D_NH4_S1_N2, G232D_NH4_S2_N1, G232D_NH4_S2_N2, G232D_Na_S1_N1, G232D_Na_S1_N2, G232D_Na_S2_N1, G232D_Na_S2_N2]
