# Supplementary material for: Conduction pathway for potassium through the Escherichia coli pump KdpFABC
Source: eLife. 2025 Nov 19;14:RP107397. doi: 10.7554/eLife.107397 (PMC12629597; doi:10.7554/eLife.107397)
Supplement: Figure 2—source data 1. [file elife-107397-fig2-data1.xlsx]

## Sheet: Fig2B
WT					KdpA_Q116R					KdpA_G232D
K+ ( mM)	ATPase activity				K+ ( mM)	ATPase activity				K+ ( mM)	ATPase activity
	1	2	3			1	2	3			1	2	3	4
0	2.601	2.3744	2.6489		0	0.306688	0.0847428	0.54074		0	1.41734	1.69107	2.1898	1.50085
0.001	2.7868	2.8349	3.1374		0.3	0.690048	0.294582	0.375289		0.5	1.54724	2.1782	1.81401	1.34543
0.004	3.7406	3.306	3.3004		1	0.722331	1.3236	0.480209		1	1.78746	1.83431	2.09669	1.71952
0.01	4.6365	3.7452	4.1273		4	2.23897	2.38302	1.79447		3	1.65292	2.35756	2.3695	1.65769
0.02	4.9208	4.5054	4.6086		13	4.20141	4.00426	3.38654		10	2.24571	2.47197	3.14111	2.22405
0.05	5.1031	5.2797	4.772		18.4	4.55957	4.56849	3.52452		30	2.69238	3.11034	3.64978	2.98155
0.11	5.7881	5.8125	5.5132		33.8	6.15567	6.024	5.71363		87	3.44395	3.80296	4.55315	3.7064
0.21	6.0717	5.7769	5.7394		77.7	8.32022	7.95129	7.17488		162	3.7299	4.36013	4.0926	4.30096
0.51	6.8286	6.3965	6.0612		188.35	8.57878	7.56471	8.98091		234	3.97653	3.25328	4.05659
1	5.6	6.1637	6.724
4	6.6	7.1118	6.6735
13.3	7.08	8.4163	6.8559
18.75	7.15	8.0256	7.2699
34.2	7.24	7.3859	7.6655

## Sheet: fig2C
WT						KdpA_Q116R						KdpA_G232D
K+ ( mM)	current (nA)					K+ ( mM)	current (nA)					K+ ( mM)	current (nA)
	1	2	3	4			1	2	3	4			1	2	3	4	5	6
300	2.5282	1.8112	1.9858	1.816		300	1.8525	1.8439	1.7174	1.8663		100	1.015	0.915	1.134	0.97	1.097	0.948
100	2.5413	1.8682	2.2693	1.8581		100	2.0013	2.135	1.7871	1.6702		30	0.855	0.78	0.938	0.921	0.844	0.668
30	2.3273	1.8404	2.1685	1.6838		30	1.6398	1.7376	2.1783	1.6942		10	0.853	0.642	0.734	0.691	0.622	0.589
10	2.4929	1.8978	2.1455	1.6536		10	1.1666	1.4311	1.2588	1.1002		3	0.581	0.499	0.584	0.433	0.608	0.443
3	2.3139	1.82	1.9951	1.6029		3	0.8149	0.6345	0.8954	0.5278		1	0.413	0.33	0.34	0.105	0.372	0.344
1	2.3498	1.6765	1.781	1.4019		1	0.3799	0.2857	0.3297	0.2172		0.3	0.239	0.169	0.086	0.073	0.238	0.193
0.3	1.9083	1.4392	1.4664	1.1986		0.3	0.198	0.0592	0.1815	0.1019		0.1	0.149	0.106	0.177	0.072	0.139	0.108
0.1	1.6669	1.2024	1.2227	1.0303		0.1	-0.1887	0.0926	0.0706	0.0603		0.03	0.087	0.106	0.164	0.12	0.068	0.079
0.03	1.4687	1.0701	1.1073	0.909		0.03	0.0926	0.0541	0.07	0.0331		0.01	0.22	0.206	0.087	0.115	0.047	0.054
0.01	1.407	0.8834	1.0483	0.7936		0	0.0122	-0.01	0.04	0.0209		0	0.074	0.033	0.118	0.081	0.04	0.041
0.003	1.1626	0.8104	0.9607	0.6985
0	1.0346	0.6186	0.8371	0.5346

## Sheet: Fig2E
WT					KdpA_Q116R					KdpA_Q116E
K+ ( mM)	ATPase activity				K+ ( mM)	ATPase activity				K+ ( mM)	ATPase activity
	1	2	3			1	2	3			1	2	3	4	5
0	2.601	2.3744	2.6489		0	0.306688	0.0847428	0.54074		0	2.9	1.15	1.93	1.65	2
0.001	2.7868	2.8349	3.1374		0.3	0.690048	0.294582	0.375289		0.001	3.08	2.4	1.93	1.67	2.11
0.004	3.7406	3.306	3.3004		1	0.722331	1.3236	0.480209		0.003	3.38	2.3	2.2	2.14	2.6
0.01	4.6365	3.7452	4.1273		4	2.23897	2.38302	1.79447		0.01	4.3	2.9	2.7	2.54	3.06
0.02	4.9208	4.5054	4.6086		13	4.20141	4.00426	3.38654		0.03	3.6	2.3	3.14	3.46	2.94
0.05	5.1031	5.2797	4.772		18.4	4.55957	4.56849	3.52452		0.1	3.66	3.76	3.83	4.34	3.92
0.11	5.7881	5.8125	5.5132		33.8	6.15567	6.024	5.71363		0.3	4.9	5.78	5	4.83	4.11
0.21	6.0717	5.7769	5.7394		77.7	8.32022	7.95129	7.17488		1	4.3	5.8	4.2	4.3	4.6
0.51	6.8286	6.3965	6.0612		188.35	8.57878	7.56471	8.98091		3	5.3	5.6	5.2	4.4	5.2
1	5.6	6.1637	6.724							10	6.8	5.6	5.6	4.85	5.4
4	6.6	7.1118	6.6735							30	6.9	5.8	5.8	5.17	6.35
13.3	7.08	8.4163	6.8559
18.75	7.15	8.0256	7.2699
34.2	7.24	7.3859	7.6655

## Sheet: Fig2F
KdpA_Q116H pH 6.4							KdpA_Q116H pH 7.3						KdpA_Q116H pH 7.9
K+ ( mM)	ATPase activity						K+ ( mM)	ATPase activity					K+ ( mM)	ATPase activity
	1	2	3	4	5			1	2	3	4			1	2	3
0	0.0654465	0.356839	0.146475	0.169849			0	1.17959	0.955207	1.22946	0.497081		0	1.5302	0.934949	1.75303
0.01	0.0333725	0.0143025	0.276515	0.0905825			0.001	1.22011	0.944299	1.26841	0.891318		0.003	1.82003	1.21699	2.02105
0.03	0.191442	0.435531	0.413196	0.331833			0.003	1.50683	1.17024	1.30581	0.727702		0.01	1.84025	1.70676	2.20258
0.1	0.388078	0.504502	0.603138	0.475396			0.01	1.47634	1.23637	1.3635	0.780281		0.03	2.52225	2.27178	3.04074
0.3	1.12689	0.957012	1.20089	0.795548			0.03	1.45815	1.18375	0.879038	0.496154		0.1	3.51372	3.08199	3.33586
0.5	1.27932	1.22478	1.21699	1.26841	1.06273		0.1	3.15314	2.60012	2.02286	1.84014		0.3	3.70022	3.99456	3.5253
1	1.84281	1.55325	1.75783	1.61148	1.16926		0.3	3.61781	2.74994	3.53203	3.1536		1	4.18291	5.18851	3.75015
3	2.0122	2.03146	2.88351	2.31868	2.18871		1	5.16333	4.10423	2.957	5.03586		3	4.97273	5.29687	4.70155
10	3.04382	2.8098	3.35369	2.22718	2.93407		3	5.7927	5.25354	3.8511	5.67075		10	5.00309	5.81004	5.60346
30	2.44404	2.98173	3.5406	3.19192	2.37398		10	6.28776	5.28714	4.34462	5.97143		30	4.88808	5.37689	5.63595
50	2.73533	2.936	3.90151	3.2074	2.75178		30	6.37731	7.51949	6.84331	6.79117
100	2.72471	3.42958	4.04117	3.01796

## Sheet: Fig2G
WT potassium						WT Rubudium						WT ammonium						WT sodium
K+ ( mM)	current (nA)					Rb+ ( mM)	current (nA)					NH4+ ( mM)	current (nA)					Na+ ( mM)	current (nA)
	1	2	3	4			1	2	3	4			1	2	3	4			1	2
300	2.5282	1.8112	1.9858	1.816		100	0.374	0.239	0.548	0.414		100	0.432	0.329	0.571	0.519		100	0.156	0.096
100	2.5413	1.8682	2.2693	1.8581		30	0.239	0.182	0.316	0.268		30	0.272	0.232	0.421	0.406		30	0.139	0.106
30	2.3273	1.8404	2.1685	1.6838		10	0.156	0.173	0.281	0.219		10	0.212	0.171	0.296	0.283		10	0.138	0.114
10	2.4929	1.8978	2.1455	1.6536		3	0.124	0.079	0.229	0.194		3	0.131	0.116	0.207	0.189		3	0.084	0.09
3	2.3139	1.82	1.9951	1.6029		1	0.12	0.131	0.19	0.151		1	0.099	0.071		0.068		1	0.065	0.079
1	2.3498	1.6765	1.781	1.4019		0.3	0.115	0.065	0.164	0.133		0.3	0.071	0.053	0.047	0.017		0.3	0.077	0.07
0.3	1.9083	1.4392	1.4664	1.1986		0.1	0.112	0.082	0.142	0.098		0.1	0.045	0.046	0.02	0.036		0.1	0.097	0.007
0.1	1.6669	1.2024	1.2227	1.0303		0.03	0.107	0.061	0.143	0.068		0.03	0.051	0.021	0.068	0.023		0.03	0.05	0.041
0.03	1.4687	1.0701	1.1073	0.909		0	0.086	0.066	0.104	0.068		0	0.026	0.023	0.019	0.01		0	0.038	0.037
0.01	1.407	0.8834	1.0483	0.7936
0.003	1.1626	0.8104	0.9607	0.6985
0	1.0346	0.6186	0.8371	0.5346

## Sheet: Fig2H
	Q116R potassium									Q116R rubudium				Q116R ammonium						Q116R sodium
K+ ( mM)	current (nA)									Rb+ ( mM)	current (nA)			NH4+ ( mM)	current (nA)					Na+ ( mM)	current (nA)
	1	2	3	4	5	6	7	8			1	2			1	2	3	4			1	2	3	4
300	0.913	0.8849	1.2145	1.1739	1.2787	1.2225	0.5617	0.677		100	0.121	0.115		100	0.152	0.122	0.105	0.106		300	0.542939	0.341019	0.481315	0.294489
100	1.0373	0.8801	1.1311	1.0379	1.276	1.1365	1.1312	1.0622		30	0.119	0.102		30	0.108	0.098	0.17	0.099		100	0.358663	0.324721	0.365964	0.201794
30	0.7863	0.6515	0.7968	0.6913	0.9395	0.7697	0.604	0.6315		10	0.088	0.091		10	0.091	0.071	0.146	0.103		30	0.248176	0.199809	0.180457	0.14444
10	0.5909	0.4986	0.5068	0.4437	0.7368	0.468	0.481	0.5128		3	0.083	0.084		3	0.096	0.05	0.09	0.067		10	0.221766	0.175554	0.175225	0.118433
3	0.4238	0.1263	0.384	0.3342	0.5715	0.1666	0.3087	0.0003		1	0.071	0.059		1	0.033	0.021	0.091	0.043		3	0.216484	0.140352	0.085932	0.057989
1	0.0963	0.0517	0.1989	0.2083	0.356	0.2362	0	0.0065		0.3	0.037	0.058		0.3	0.01	0.062	0.078	0.038		1	0.150597	0.093737	0.099965	0.073752
0.3	0.0497	0.0366	0.1471	0.1344	0.1636	0	0	0		0.1	0.095	0.083		0.1	0.051	0.076	0.032	0.03		0.3	0.106302	0.072362	0.074572	0.086867
0.1	0.0144	0.0191	0.1221	0.1045	0.0173	0.0513	0	0		0.03	0.056	0.015		0.03	0.024	0.02	0.057	0.026		0.1	0.053853	0.055951	0.035185	0.016038
0.03	0.0061	0	0.1109	0.0744	0	0	0	0		0	0.031	0.036		0	0.032	0.039	0.067	0.047		0.03	0.075205	0.039149	0.035936	0.025673
0	0	0	0.1213	0	0	0	0	0												0	0.024562	0.009931	0.01506	0.052391

## Sheet: Fig2I
G232D potassium								G232D rubudium						G232D ammonium						G232D sodium
K+ ( mM)	current (nA)							Rb+ ( mM)	current (nA)					NH4+ ( mM)	current (nA)					Na+ ( mM)	current (nA)
	1	2	3	4	5	6			1	2	3	4			1	2	3	4			1	2	3	4
100	1.015	0.915	1.134	0.97	1.097	0.948		100	0.639	0.627	0.482	0.624		100	0.716	0.619	0.955	0.882		100	0.196	0.217	0.202	0.164
30	0.855	0.78	0.938	0.921	0.844	0.668		30	0.502	0.529	0.651	0.718		30	0.423	0.398	0.762	0.652		30	0.175	0.147	0.126	0.103
10	0.853	0.642	0.734	0.691	0.622	0.589		10	0.401	0.213	0.544	0.544		10	0.369	0.328	0.558	0.515		10	0.411	0.407	0.085	0.064
3	0.581	0.499	0.584	0.433	0.608	0.443		3	0.188	0.209	0.535	0.371		3	0.246	0.266	0.456	0.427		3	0.104	0.104	0.082	0.096
1	0.413	0.33	0.34	0.105	0.372	0.344		1	0.178	0.181	0.326	0.205		1	0.154	0.177	0.382	0.319		1	0.063	0.064	0.047	0.056
0.3	0.239	0.169	0.086	0.073	0.238	0.193		0.3	0.143	0.076	0.166	0.162		0.3	0.117	0.12	0.223	0.218		0.3	0.068	0.041	0.043	0.062
0.1	0.149	0.106	0.177	0.072	0.139	0.108		0.1	0.08	0.082	0.101	0.086		0.1	0.125	0.105	0.198	0.168		0.1	0.042	0.031	0.042	0.063
0.03	0.087	0.106	0.164	0.12	0.068	0.079		0.03	0.058	0.038	0.076	0.054		0.03	0.042	0.083	0.114	0.097		0.03	0.04	0.02	0.066	0.081
0.01	0.22	0.206	0.087	0.115	0.047	0.054		0.01	0.021	0.019	0.059	0.042		0			0.055	0.078		0	0.035	0.025	0.079	0.082
0	0.074	0.033	0.118	0.081	0.04	0.041
