# Supplementary material for: Conduction pathway for potassium through the Escherichia coli pump KdpFABC
Source: eLife. 2025 Nov 19;14:RP107397. doi: 10.7554/eLife.107397 (PMC12629597; doi:10.7554/eLife.107397)
Supplement: Figure 3—source data 1. [file elife-107397-fig3-data1.xlsx]

## Sheet: Fig3C
WT ATPase potassium titration					E370Q ATPase potassium titration							E370H ATPase potassium titration
K+ (mM)	ATPase activity				K+ (mM)	ATPase activity						K+ (mM)	ATPase activity
0	2.2	2.2	2.4		0	1.32591	1.62568	2.28575	2.42987	1.9658		0	0.902193	0.0864722	0.812839
0.001	2.5	2.75	2.65		0.001	1.38644	1.47003	2.50193	2.29151	2.28287		0.001	0.752308	0.821486	0.956959
0.003	3.4	2.77	2.87		0.003	1.9831	1.78997	2.55381	2.94294	2.25981		0.003	1.0809	0.792662	1.25096
0.01	3.8	3.36	3.57		0.01	1.43463	2.49885	3.55719	2.40478	2.23133		0.01	1.27588	0.928985	1.31704
0.03	4	3.92	4.1		0.03	1.17757	2.95131	2.95131	2.53222	2.65323		0.03	1.18347	1.93901	1.89769
0.1	4.68	4.44	4.6		0.1	2.34235	3.9069	3.22484	3.16501	4.4005		0.1	2.68936	1.87268	2.07012
0.3	6.3	5.4	6.43		0.3	3.34359	2.51922	3.65981	3.8652	3.59757		0.3	4.13284	2.38385	3.38906	2.1	2.88	3.69
1	4.3	6	5.6		1	4.2415	5.82223	3.84558	4.36667	4.56463		1	4.00861	4.35794	2.83834	4.07	3.65	3.69
3	4.2	5.6	5.2		3	4.80903	5.41461	4.55967	4.71106	4.9723		3	5.36414	4.7734	4.05502
10	4.5	6.2	5.4		10	5.3266	7.59876	4.8638	5.37138	5.75057		10	6.35071	5.77147	4.98323
30	5.8	6.5	5.5		30	6.11937	7.30707	5.54964	6.5203	7.5		30	5.77572	6.50221	6.05908
	E370K ATPase potassium titration					E370K_R493 ATPase potassium titration
K+ (mM)	ATPase activity					K+ (mM)	ATPase activity
0	0.171407	0.193186	0.107587	0.215174		0	1.28778	1.21017	0.880006
0.5	0.138684	0.186118	0.163344	0.120152		0.003	0.945776	0.904999	0.594563
1	0.125897	0.204604	0.190329	0.199845		0.01	0.863929	0.698924	0.578188
3	0.206997	0.144721	0.186763	0.113189		0.03	0.874024	0.716457	0.492901
10	0.432525	0.280531	0.303299	0.325254		0.1	0.846296	0.675672	0.820361
30	0.777356	0.543207	0.476023	0.578438		0.3	1.17276	1.17418	1.3261
50	0.666541	0.636826	0.534272	0.974261		1	2.10427	1.56359	1.10395
100	1.01286	0.93951	1.03304	0.969268		3	2.67524	2.25669	2.40027
						10	3.50678	3.02585	3.87053
						30	4.21433	4.02589	3.88835

## Sheet: Fig3D
WT ATPase potassium titration					R493E ATPase potassium titration					R493Q ATPase potassium titration					R493M ATPase potassium titration
K+ (mM)	ATPase activity				K+ (mM)	ATPase activity				K+ (mM)	ATPase activity				K+ (mM)	ATPase activity
0	2.2	2.2	2.4		0	0.925613	1.21566	0.902914		0	0.653296	0.612781	0.640635		0	0.87873	0.395994	0.452565
0.001	2.5	2.75	2.65		0.001	1.38464	1.49561	0.923091		0.001	0.567203	0.574799	0.714068		0.003	0.848559	0.595877	0.580792
0.003	3.4	2.77	2.87		0.003	1.5057	1.68981	1.23079		0.003	1.03818	0.871061	0.901447		0.01	0.896235	1.13472	0.157707
0.01	3.8	3.36	3.57		0.01	1.81865	1.66688	1.01608		0.01	0.890926	1.09752	0.880597		0.03	0.946074	1.68363	0.602398
0.03	4	3.92	4.1		0.03	2.68569	1.63207	2.32416		0.03	1.35844	1.13031	1.83286		0.1	1.83963	1.56173	0.9707
0.1	4.68	4.44	4.6		0.1	3.75097	3.68553	3.55465		0.1	2.70381	1.44781	2.09946		0.3	3.63619	2.3169	2.9969
0.3	6.3	5.4	6.43		0.3	4.60744	4.9097	4.25344		0.3	3.04469	3.17588	2.88891		1	4.82211	2.66626	4.07556	4.92876
1	4.3	6	5.6		1	3.8132	4.01952	5.77202		1	4.9202	4.04561	4.35504		3	5.36001	4.18314	4.08215	4.73856
3	4.2	5.6	5.2		3	5.45468	4.89363	5.73261		3	5.16027	4.29979	5.11855		10	5.3247	5.57472	6.0357	5.45752
10	4.5	6.2	5.4		10	5.96182	5.7711	5.61174		10	5.36057	4.8072	5.24518		30	6.00696	6.02274	6.35011	5.70721
30	5.8	6.5	5.5		30	7.91298	7.76264	6.53349		30	6.71989	5.50459	5.96529		50	6.73709	6.30308	6.04028	7.44982
