# Supplementary material for: Conduction pathway for potassium through the Escherichia coli pump KdpFABC
Source: eLife. 2025 Nov 19;14:RP107397. doi: 10.7554/eLife.107397 (PMC12629597; doi:10.7554/eLife.107397)
Supplement: Figure 4—figure supplement 1—source data 1. [file elife-107397-fig4-figsupp1-data1.xlsx]

## Sheet: panel A
		ATPase data (umoles Pi/mg/min)										transport data (nA)
WT	5.69715	4.52412	5.19614						WT	1.0732	1.0398	1.1585	0.9692	1.0564	1.1142
V496M	3.74489	2.99682	4.33428	4.37281	3.92624	3.62248			V496M	1.1718	0.8829	0.8994	0.6974	0.7327	0.754
V496E	4.33428	4.65164	3.37539	2.8744	3.56354	3.86503			V496E	0.8034	1.143	1.2909	1.266	0.7226	1.3042	1.4299
V496R	0.301495	0.670997	0.272026	0.52365	0.446576	0.351367			V496R	0.0985	0.122	0.0953	0.1406	0.0958	0.1187
V496H	1.05183	2.37116	2.60918	3.13056	2.35756	2.38022			V496H	0.4201	0.5282	0.539
V496W	2.05379	2.36889	1.97445	1.62082	2.69306	1.59135			V496W	0.4628	0.3776	0.3284	0.3959	0.3999	0.3937

## Sheet: WT_surfer_traces
time (s)	current (nA)
0	-0.000487354	-0.000206748	-0.000188287	-0.000457816	-0.000291668	-0.000232593
0.001	-0.00307321	-0.00125506	-0.0012297	-0.00292555	-0.00183697	-0.00145673
0.002	-0.00967498	-0.00384338	-0.0039923	-0.00931495	-0.00574778	-0.00456396
0.003	-0.02108	-0.00825292	-0.00889298	-0.0204944	-0.0123944	-0.00995016
0.004	-0.0367658	-0.0142967	-0.0157849	-0.0360876	-0.0213367	-0.0174345
0.005	-0.0555135	-0.0214446	-0.0242874	-0.0549858	-0.031746	-0.0265456
0.006	-0.0759493	-0.0290225	-0.0338352	-0.0757744	-0.042746	-0.0368939
0.007	-0.0967809	-0.03639	-0.0436141	-0.0970895	-0.0536134	-0.0480795
0.008	-0.116799	-0.0430272	-0.0528368	-0.117714	-0.06384	-0.0592775
0.009	-0.134837	-0.0485906	-0.061001	-0.136516	-0.0730747	-0.0694035
0.01	-0.149873	-0.0529799	-0.0678594	-0.152551	-0.0810579	-0.0777204
0.011	-0.16133	-0.0563053	-0.0733784	-0.165192	-0.0876311	-0.0840492
0.012	-0.169164	-0.0587395	-0.0777296	-0.1742	-0.09277	-0.0885084
0.013	-0.173717	-0.0604089	-0.081127	-0.179788	-0.0965026	-0.091317
0.014	-0.175613	-0.0613082	-0.0836829	-0.182511	-0.0988802	-0.0927488
0.015	-0.175607	-0.0613664	-0.0854702	-0.182999	-0.100084	-0.0930799
0.016	-0.174354	-0.0606391	-0.0865866	-0.181807	-0.100369	-0.0925129
0.017	-0.172349	-0.0593341	-0.0871631	-0.179431	-0.099971	-0.091179
0.018	-0.169999	-0.0577255	-0.0874175	-0.176305	-0.0991126	-0.0892343
0.019	-0.167536	-0.0561038	-0.087614	-0.172841	-0.0979534	-0.0868672
0.02	-0.164993	-0.0547368	-0.0878152	-0.169449	-0.0965906	-0.0842417
0.021	-0.162419	-0.053827	-0.0877721	-0.166349	-0.0951754	-0.0814633
0.022	-0.159979	-0.0535119	-0.0872091	-0.163554	-0.093843	-0.0786731
0.023	-0.157863	-0.0538693	-0.0861364	-0.160999	-0.0926739	-0.0761491
0.024	-0.156174	-0.0547789	-0.0848191	-0.158675	-0.0918085	-0.0740877
0.025	-0.154918	-0.0559002	-0.0834767	-0.156739	-0.0913041	-0.0724532
0.026	-0.154078	-0.0569532	-0.0821681	-0.155316	-0.0910732	-0.0712515
0.027	-0.153666	-0.0578144	-0.0808655	-0.154335	-0.0910155	-0.0705917
0.028	-0.153674	-0.058387	-0.0794986	-0.153661	-0.0909743	-0.070426
0.029	-0.153952	-0.0586044	-0.0780851	-0.153227	-0.0907174	-0.0706037
0.03	-0.154263	-0.0584484	-0.0767363	-0.152978	-0.090123	-0.0710273
0.031	-0.154466	-0.0579409	-0.0755708	-0.152763	-0.0893221	-0.071613
0.032	-0.154502	-0.0571972	-0.0747575	-0.152346	-0.088564	-0.0722624
0.033	-0.15429	-0.0563348	-0.0744314	-0.151584	-0.0880444	-0.0728589
0.034	-0.153796	-0.0553455	-0.074562	-0.1506	-0.0879253	-0.0732929
0.035	-0.153172	-0.0542352	-0.075013	-0.149677	-0.0883153	-0.0734999
0.036	-0.152597	-0.0531304	-0.0756177	-0.148959	-0.0891724	-0.0734969
0.037	-0.152098	-0.052164	-0.0761752	-0.148426	-0.0903655	-0.0734247
0.038	-0.151728	-0.0514508	-0.0764795	-0.148041	-0.0917778	-0.0734469
0.039	-0.151629	-0.0510789	-0.0764741	-0.147784	-0.0932739	-0.0735709
0.04	-0.151872	-0.0510244	-0.0763037	-0.147693	-0.0946248	-0.0736767
0.041	-0.15243	-0.0511593	-0.0761453	-0.147833	-0.0955382	-0.0737044
0.042	-0.153206	-0.0513202	-0.0760952	-0.148202	-0.0958928	-0.073643
0.043	-0.154096	-0.0513836	-0.0761061	-0.148795	-0.0957908	-0.0734483
0.044	-0.155032	-0.0513692	-0.0760265	-0.14964	-0.0952802	-0.0731268
0.045	-0.155896	-0.0514424	-0.0758227	-0.15068	-0.0943354	-0.072747
0.046	-0.156566	-0.0516516	-0.0755983	-0.151763	-0.0930566	-0.0723474
0.047	-0.156985	-0.0518077	-0.0753866	-0.15275	-0.0916232	-0.0718974
0.048	-0.157153	-0.0517174	-0.0751569	-0.153503	-0.0901664	-0.0713576
0.049	-0.157142	-0.051317	-0.0749191	-0.153894	-0.0887671	-0.0707943
0.05	-0.157046	-0.0506309	-0.0746113	-0.15396	-0.0874709	-0.0703734
0.051	-0.156895	-0.0497119	-0.0739991	-0.153904	-0.0862591	-0.0702402
0.052	-0.156685	-0.0486444	-0.0728876	-0.153896	-0.0850462	-0.0705067
0.053	-0.156432	-0.0476325	-0.0714139	-0.153972	-0.083826	-0.071305
0.054	-0.156167	-0.0469597	-0.0699776	-0.154105	-0.0827316	-0.0726414
0.055	-0.155869	-0.0468055	-0.0688823	-0.1543	-0.0817684	-0.0742234
0.056	-0.15554	-0.0471404	-0.0681434	-0.15457	-0.0807555	-0.0756413
0.057	-0.155346	-0.0477565	-0.0676939	-0.154939	-0.0796529	-0.0766808
0.058	-0.155499	-0.0484211	-0.0676026	-0.155483	-0.0786577	-0.0773547
0.059	-0.156028	-0.0490694	-0.0679005	-0.156231	-0.0779831	-0.0777367
0.06	-0.156768	-0.0497393	-0.0684338	-0.156971	-0.0776708	-0.0778741
0.061	-0.15753	-0.0503992	-0.0690214	-0.157298	-0.0776125	-0.0777889
0.062	-0.158259	-0.0510181	-0.0695421	-0.156756	-0.0777068	-0.0774694
0.063	-0.158972	-0.0515563	-0.0698991	-0.154897	-0.0779398	-0.0769259
0.064	-0.159628	-0.0518653	-0.0700692	-0.151411	-0.0783722	-0.0762772
0.065	-0.160204	-0.0518565	-0.0700725	-0.146318	-0.0790733	-0.0756635
0.066	-0.160718	-0.0516295	-0.069883	-0.140057	-0.0800607	-0.0751543
0.067	-0.161122	-0.0512717	-0.0695172	-0.133393	-0.0813303	-0.0747989
0.068	-0.161329	-0.0507301	-0.0690569	-0.127188	-0.0828271	-0.0746406
0.069	-0.161276	-0.0499769	-0.0685577	-0.122172	-0.0843792	-0.0746982
0.07	-0.160961	-0.049154	-0.0680773	-0.1188	-0.0858035	-0.074892
0.071	-0.160479	-0.0484837	-0.0677066	-0.117251	-0.086961	-0.0749795
0.072	-0.159845	-0.0481123	-0.0675285	-0.11749	-0.087665	-0.0747555
0.073	-0.158836	-0.0480601	-0.067565	-0.119276	-0.0877798	-0.0742169
0.074	-0.157348	-0.0482335	-0.0677282	-0.122194	-0.0874133	-0.0734246
0.075	-0.155628	-0.0485075	-0.0678617	-0.125797	-0.0868587	-0.0724817
0.076	-0.15403	-0.0487699	-0.067909	-0.129706	-0.0864026	-0.071659
0.077	-0.152845	-0.0489085	-0.0680058	-0.133563	-0.0862206	-0.0711809
0.078	-0.152213	-0.0489028	-0.0683259	-0.13704	-0.0863587	-0.0709283
0.079	-0.152071	-0.0488171	-0.0688691	-0.139917	-0.0867875	-0.0705623
0.08	-0.152214	-0.0487018	-0.0694707	-0.142103	-0.0874644	-0.0698637
0.081	-0.152426	-0.0485978	-0.069999	-0.143571	-0.0883178	-0.0689169
0.082	-0.152605	-0.04848	-0.0704888	-0.144286	-0.0892326	-0.0679998
0.083	-0.152708	-0.0482213	-0.071089	-0.144279	-0.0901624	-0.0674138
0.084	-0.152738	-0.0477606	-0.071909	-0.14364	-0.0912325	-0.0674398
0.085	-0.15281	-0.0472251	-0.0729327	-0.142442	-0.0926025	-0.068218
0.086	-0.15305	-0.0468233	-0.0740484	-0.140836	-0.0942814	-0.0696887
0.087	-0.153496	-0.0466942	-0.0751218	-0.139128	-0.0961269	-0.0717371
0.088	-0.154145	-0.0468706	-0.0760288	-0.137627	-0.097939	-0.0742283
0.089	-0.155019	-0.0473507	-0.076583	-0.136526	-0.0995702	-0.0768884
0.09	-0.156054	-0.048181	-0.0765131	-0.135954	-0.100895	-0.079402
0.091	-0.157055	-0.0494232	-0.0756904	-0.13596	-0.10171	-0.081659
0.092	-0.157835	-0.0510591	-0.0742889	-0.136436	-0.101776	-0.0836679
0.093	-0.158296	-0.0529916	-0.0725817	-0.137275	-0.100953	-0.0853314
0.094	-0.158391	-0.0550917	-0.070758	-0.13852	-0.0993041	-0.0864877
0.095	-0.158126	-0.0571863	-0.0689507	-0.1402	-0.0969918	-0.0870515
0.096	-0.157504	-0.0591132	-0.0672405	-0.142194	-0.0941839	-0.0870961
0.097	-0.1566	-0.0607567	-0.0657082	-0.144279	-0.0911235	-0.0868253
0.098	-0.155676	-0.0619853	-0.0644968	-0.146204	-0.0881447	-0.086437
0.099	-0.154946	-0.0627119	-0.0637153	-0.147704	-0.085535	-0.0859727
0.1	-0.154384	-0.0630077	-0.063367	-0.148492	-0.083447	-0.0853758
0.101	-0.153933	-0.0630725	-0.0633185	-0.148394	-0.0819658	-0.0847108
0.102	-0.153596	-0.0630827	-0.0633524	-0.147481	-0.0811116	-0.0840843
0.103	-0.153389	-0.0631283	-0.0633707	-0.146061	-0.0807452	-0.0834519
0.104	-0.1534	-0.0632441	-0.0634042	-0.144561	-0.0805693	-0.0826429
0.105	-0.153668	-0.0633883	-0.0634628	-0.143278	-0.0803304	-0.0815018
0.106	-0.153963	-0.0634909	-0.063521	-0.142371	-0.080007	-0.0800764
0.107	-0.153963	-0.0635438	-0.0636084	-0.142043	-0.0797066	-0.0785667
0.108	-0.153579	-0.0635629	-0.0638234	-0.142372	-0.0795454	-0.0770444
0.109	-0.152884	-0.0634906	-0.0642441	-0.143221	-0.079681	-0.0754516
0.11	-0.151993	-0.0632217	-0.0649041	-0.144382	-0.0803093	-0.0738187
0.111	-0.151103	-0.0627734	-0.0658108	-0.14573	-0.0815716	-0.0722791
0.112	-0.150369	-0.0623595	-0.0669579	-0.147258	-0.0834173	-0.0710081
0.113	-0.149782	-0.0622722	-0.0683645	-0.148862	-0.0856168	-0.0702545
0.114	-0.149353	-0.0627392	-0.0700654	-0.150294	-0.0878865	-0.0702537
0.115	-0.1492	-0.0637632	-0.0720517	-0.151386	-0.089995	-0.0710406
0.116	-0.149406	-0.0650583	-0.0742342	-0.152041	-0.0918768	-0.0723762
0.117	-0.149952	-0.0662656	-0.0764771	-0.152125	-0.0935543	-0.0738698
0.118	-0.150755	-0.0672481	-0.0786261	-0.151545	-0.0949763	-0.075228
0.119	-0.151697	-0.0681657	-0.0805138	-0.150238	-0.0960727	-0.0762779
0.12	-0.152617	-0.0692237	-0.082039	-0.148175	-0.0968172	-0.0768263
0.121	-0.153271	-0.0704586	-0.083187	-0.14558	-0.0971967	-0.0767664
0.122	-0.153461	-0.0718445	-0.083908	-0.142859	-0.0972961	-0.0761728
0.123	-0.153183	-0.0733892	-0.0840722	-0.140289	-0.097281	-0.0751338
0.124	-0.152517	-0.0750431	-0.0835746	-0.138018	-0.0971704	-0.073729
0.125	-0.15151	-0.0767157	-0.0823976	-0.136201	-0.09682	-0.0722412
0.126	-0.150271	-0.0784138	-0.0806542	-0.135009	-0.0962008	-0.07114
0.127	-0.149039	-0.0801421	-0.0786209	-0.134597	-0.0955253	-0.0708553
0.128	-0.147993	-0.0817744	-0.0765535	-0.135051	-0.0950479	-0.0715825
0.129	-0.147074	-0.0832222	-0.0745148	-0.136301	-0.0949473	-0.0732207
0.13	-0.146108	-0.0844776	-0.0725264	-0.138068	-0.0952851	-0.0755702
0.131	-0.144939	-0.0854264	-0.0707756	-0.140012	-0.0959162	-0.0784778
0.132	-0.143538	-0.0859088	-0.0695849	-0.141758	-0.0965912	-0.0817857
0.133	-0.142124	-0.0859284	-0.0691481	-0.142748	-0.0971447	-0.0852867
0.134	-0.141031	-0.0856157	-0.0693291	-0.142448	-0.0975513	-0.0887191
0.135	-0.140432	-0.0850698	-0.0698314	-0.140677	-0.0978707	-0.0918512
0.136	-0.140184	-0.08431	-0.0704239	-0.137588	-0.0981758	-0.0945569
0.137	-0.140007	-0.0833083	-0.0709799	-0.133528	-0.0984561	-0.0967198
0.138	-0.139847	-0.0820279	-0.0714719	-0.128972	-0.0985292	-0.09812
0.139	-0.139875	-0.0804132	-0.071864	-0.124508	-0.0981803	-0.0985778
0.14	-0.140157	-0.0783952	-0.0720457	-0.120699	-0.0974045	-0.0981843
0.141	-0.140524	-0.0759719	-0.0719638	-0.117844	-0.0963042	-0.0972077
0.142	-0.140779	-0.0732457	-0.0717158	-0.116048	-0.0948701	-0.0958478
0.143	-0.140879	-0.0703308	-0.0715039	-0.115412	-0.093076	-0.0942644
0.144	-0.140893	-0.0672185	-0.0715426	-0.115964	-0.0909943	-0.092676
0.145	-0.14093	-0.063907	-0.0719078	-0.11756	-0.0887209	-0.0911624
0.146	-0.141125	-0.0606244	-0.0724691	-0.119909	-0.0863524	-0.0895511
0.147	-0.141569	-0.0576715	-0.0730882	-0.122678	-0.0840262	-0.0876827
0.148	-0.142293	-0.0551806	-0.0737691	-0.12558	-0.0818933	-0.0855467
0.149	-0.143165	-0.0531216	-0.0745378	-0.128366	-0.0801385	-0.0831751
0.15	-0.14388	-0.0513793	-0.0752824	-0.130821	-0.0789866	-0.0806642
0.151	-0.144296	-0.0497869	-0.0757522	-0.132779	-0.0785987	-0.0781497
0.152	-0.144525	-0.0482315	-0.0758252	-0.134097	-0.079018	-0.0756519
0.153	-0.14468	-0.0467989	-0.0756433	-0.134654	-0.0801713	-0.0731632
0.154	-0.144788	-0.0456693	-0.0753095	-0.13444	-0.0819567	-0.0708138
0.155	-0.144856	-0.0449055	-0.0747997	-0.133678	-0.0842967	-0.0687897
0.156	-0.144868	-0.0444504	-0.0742808	-0.132788	-0.0869509	-0.0672116
0.157	-0.14478	-0.0442128	-0.0741243	-0.132128	-0.0894735	-0.0660831
0.158	-0.14459	-0.0440947	-0.0744935	-0.131864	-0.0915051	-0.0653386
0.159	-0.144372	-0.044012	-0.0752043	-0.132152	-0.0929661	-0.0649086
0.16	-0.14424	-0.0439689	-0.0759776	-0.133114	-0.093905	-0.0646461
0.161	-0.144302	-0.044122	-0.0766131	-0.134588	-0.094363	-0.0644085
0.162	-0.144575	-0.0446686	-0.0770374	-0.136103	-0.094468	-0.064196
0.163	-0.144969	-0.0456923	-0.0772338	-0.137163	-0.0943479	-0.0640469
0.164	-0.145358	-0.0471422	-0.0771568	-0.137556	-0.0939452	-0.0639879
0.165	-0.145644	-0.0488262	-0.0768208	-0.137254	-0.0931806	-0.0640517
0.166	-0.145795	-0.0504903	-0.0763132	-0.136264	-0.0921414	-0.0642784
0.167	-0.145872	-0.051993	-0.0757191	-0.13477	-0.0908869	-0.0647286
0.168	-0.145934	-0.0533088	-0.075109	-0.133076	-0.0892964	-0.0654123
0.169	-0.1458	-0.0544334	-0.0745184	-0.13137	-0.087281	-0.0662693
0.17	-0.145075	-0.0553274	-0.0739441	-0.129731	-0.0849745	-0.0672166
0.171	-0.143569	-0.055862	-0.0733179	-0.128267	-0.0826151	-0.0681984
0.172	-0.141579	-0.0559493	-0.0724551	-0.127181	-0.0803873	-0.0692164
0.173	-0.139613	-0.0556637	-0.0712135	-0.126657	-0.0784641	-0.0702433
0.174	-0.13807	-0.0551644	-0.0696304	-0.126783	-0.0769631	-0.0711838
0.175	-0.137241	-0.0546908	-0.0677567	-0.127576	-0.0758767	-0.0719036
0.176	-0.137251	-0.0544666	-0.065691	-0.129008	-0.0751998	-0.0721705
0.177	-0.13798	-0.0545231	-0.0636963	-0.130982	-0.0749603	-0.0718273
0.178	-0.13916	-0.0547458	-0.0619638	-0.133281	-0.0751603	-0.0710503
0.179	-0.1405	-0.0549907	-0.0605558	-0.13567	-0.0757775	-0.0701688
0.18	-0.141802	-0.0551317	-0.0595905	-0.138054	-0.0767334	-0.069359
0.181	-0.143047	-0.0550352	-0.0591707	-0.140336	-0.0779588	-0.0686538
0.182	-0.144277	-0.0545424	-0.0592656	-0.142206	-0.0794927	-0.0680655
0.183	-0.145433	-0.0535967	-0.0598385	-0.143392	-0.0813633	-0.0675764
0.184	-0.146429	-0.0522805	-0.0608736	-0.14391	-0.0834381	-0.0671123
0.185	-0.147282	-0.0506628	-0.0622873	-0.143862	-0.0854305	-0.0666485
0.186	-0.14804	-0.0488473	-0.064025	-0.143225	-0.0870753	-0.0662859
0.187	-0.148676	-0.0470725	-0.0659886	-0.142008	-0.0883142	-0.0660914
0.188	-0.149073	-0.0455451	-0.0679021	-0.140433	-0.0891936	-0.0659349
0.189	-0.149139	-0.0443994	-0.0695332	-0.138807	-0.0897517	-0.0656531
0.19	-0.14891	-0.0437817	-0.0708433	-0.137285	-0.0900871	-0.0653085
0.191	-0.148481	-0.0437498	-0.0718618	-0.135897	-0.0903261	-0.0650906
0.192	-0.147949	-0.0441899	-0.0726163	-0.134682	-0.0904955	-0.0650739
0.193	-0.14742	-0.0449416	-0.0731691	-0.133701	-0.0904526	-0.0652525
0.194	-0.146879	-0.0459342	-0.0736232	-0.13303	-0.0900512	-0.0656779
0.195	-0.146197	-0.0470264	-0.0740692	-0.132775	-0.0893673	-0.0664341
0.196	-0.145269	-0.0479567	-0.0745167	-0.132928	-0.0886465	-0.0675514
0.197	-0.144087	-0.0486157	-0.0750045	-0.133289	-0.0881596	-0.0689643
0.198	-0.142756	-0.0490994	-0.0757063	-0.133606	-0.0881593	-0.0704913
0.199	-0.141443	-0.0495378	-0.0766436	-0.133593	-0.0888698	-0.0718521
0.2	-0.140266	-0.0499517	-0.0775343	-0.133072	-0.0903497	-0.0727594
0.201	-0.139208	-0.0502571	-0.0781107	-0.13214	-0.0923446	-0.0730706
0.202	-0.138128	-0.0503839	-0.0782924	-0.130999	-0.0943817	-0.0728311
0.203	-0.136916	-0.0503231	-0.0780637	-0.129764	-0.0960016	-0.0721893
0.204	-0.135561	-0.0501853	-0.0774729	-0.128469	-0.0970007	-0.0713668
0.205	-0.134112	-0.0501574	-0.0767524	-0.127097	-0.0974973	-0.0706249
0.206	-0.13269	-0.050284	-0.0761707	-0.125726	-0.0976696	-0.0701457
0.207	-0.131472	-0.0504469	-0.0757806	-0.124533	-0.0974602	-0.0699465
0.208	-0.130499	-0.0506117	-0.075479	-0.123487	-0.0966364	-0.0699776
0.209	-0.129642	-0.0509107	-0.0751763	-0.122378	-0.0951837	-0.0702471
0.21	-0.128839	-0.0513896	-0.074788	-0.121125	-0.0934159	-0.0707468
0.211	-0.128159	-0.0519191	-0.0741825	-0.119781	-0.0916794	-0.0714077
0.212	-0.127677	-0.0524002	-0.0732518	-0.118402	-0.0901429	-0.0721079
0.213	-0.127421	-0.0527829	-0.0719559	-0.117089	-0.0888051	-0.072654
0.214	-0.12736	-0.0529788	-0.0702827	-0.11598	-0.0876548	-0.0728847
0.215	-0.127493	-0.0529464	-0.0682894	-0.115161	-0.0867538	-0.0727809
0.216	-0.127934	-0.0527582	-0.0661255	-0.114683	-0.0861225	-0.0724465
0.217	-0.128773	-0.0524743	-0.063988	-0.114598	-0.0856169	-0.0719791
0.218	-0.12989	-0.0520649	-0.0621273	-0.11496	-0.0849817	-0.0713377
0.219	-0.131052	-0.0515258	-0.060738	-0.115769	-0.0840321	-0.0704096
0.22	-0.132212	-0.0508849	-0.0597962	-0.116834	-0.0827561	-0.0692503
0.221	-0.133413	-0.0500525	-0.0591252	-0.117847	-0.0812581	-0.068084
0.222	-0.134543	-0.0488637	-0.0585583	-0.118604	-0.0796249	-0.067021
0.223	-0.135485	-0.0473431	-0.0580946	-0.119023	-0.0779146	-0.0660054
0.224	-0.136241	-0.0457796	-0.0579667	-0.119171	-0.0762117	-0.0650281
0.225	-0.136904	-0.0444281	-0.058426	-0.119291	-0.0745923	-0.0641571
0.226	-0.137588	-0.043316	-0.0594979	-0.119651	-0.0731491	-0.0634051
0.227	-0.138291	-0.0424441	-0.0609334	-0.120459	-0.0720519	-0.0627617
0.228	-0.138923	-0.0419337	-0.0623222	-0.121897	-0.0714362	-0.0623139
0.229	-0.139385	-0.0419193	-0.0633165	-0.124002	-0.0712607	-0.0622249
0.23	-0.13959	-0.0424098	-0.0637245	-0.126512	-0.0713561	-0.0625244
0.231	-0.139533	-0.0431939	-0.0635397	-0.128974	-0.0715859	-0.0630836
0.232	-0.139295	-0.0439757	-0.0629903	-0.13098	-0.0719169	-0.0638565
0.233	-0.138916	-0.0445654	-0.0623447	-0.132282	-0.0723102	-0.0648455
0.234	-0.138309	-0.0448446	-0.0617183	-0.132796	-0.0726537	-0.0659556
0.235	-0.137398	-0.0448078	-0.0611805	-0.132558	-0.0728421	-0.0670167
0.236	-0.136282	-0.0446026	-0.0608095	-0.131642	-0.0727991	-0.067839
0.237	-0.135106	-0.0443499	-0.0605667	-0.130071	-0.0725606	-0.0683236
0.238	-0.133913	-0.0440485	-0.0603643	-0.127955	-0.0722772	-0.0685148
0.239	-0.132788	-0.0437005	-0.0602769	-0.125585	-0.0719235	-0.0685232
0.24	-0.131844	-0.0433544	-0.0604006	-0.123237	-0.0713266	-0.0684246
0.241	-0.131031	-0.0429885	-0.0606484	-0.121108	-0.0705036	-0.0682612
0.242	-0.13025	-0.0425322	-0.0609403	-0.119446	-0.0696612	-0.0681272
0.243	-0.129569	-0.0420077	-0.0613208	-0.118567	-0.0689792	-0.0681345
0.244	-0.129098	-0.0415588	-0.0618112	-0.118796	-0.0685329	-0.0683161
0.245	-0.128718	-0.0413547	-0.062356	-0.120242	-0.0682559	-0.0686544
0.246	-0.128192	-0.041457	-0.0628763	-0.122509	-0.0679415	-0.0691334
0.247	-0.127486	-0.0418143	-0.0632106	-0.124983	-0.0674366	-0.0697217
0.248	-0.12673	-0.0424267	-0.0630907	-0.127371	-0.0667858	-0.0703706
0.249	-0.125956	-0.0433638	-0.0624159	-0.129628	-0.0661656	-0.0710495
0.25	-0.125071	-0.0445972	-0.0614299	-0.131596	-0.0657579	-0.071726
0.251	-0.123994	-0.0459915	-0.0604969	-0.133063	-0.0656253	-0.0723194
0.252	-0.122713	-0.0474096	-0.059899	-0.133992	-0.0657489	-0.0727695
0.253	-0.121335	-0.0487904	-0.0598067	-0.134445	-0.0661917	-0.0730384
0.254	-0.120092	-0.0501817	-0.0602079	-0.134292	-0.0670302	-0.0730651
0.255	-0.119198	-0.0517152	-0.0609538	-0.13323	-0.0682138	-0.0728232
0.256	-0.118771	-0.053484	-0.0618755	-0.131182	-0.069623	-0.0722815
0.257	-0.118846	-0.055369	-0.0627311	-0.12844	-0.0710907	-0.0714652
0.258	-0.119405	-0.0571845	-0.0632703	-0.125412	-0.0724454	-0.0706062
0.259	-0.12044	-0.0588914	-0.0634417	-0.122479	-0.0735907	-0.0699716
0.26	-0.121922	-0.0604587	-0.0634221	-0.120042	-0.0744179	-0.0695737
0.261	-0.123684	-0.0617821	-0.0634207	-0.118436	-0.0748155	-0.0692005
0.262	-0.125465	-0.0627384	-0.0634355	-0.117791	-0.0748206	-0.0687224
0.263	-0.127106	-0.0631895	-0.0632302	-0.11806	-0.0746241	-0.0682177
0.264	-0.128538	-0.0630826	-0.0625438	-0.119046	-0.0744847	-0.0678464
0.265	-0.12964	-0.0625413	-0.0613292	-0.12046	-0.0746612	-0.0676883
0.266	-0.130244	-0.0617984	-0.0598121	-0.122009	-0.0753148	-0.0676423
0.267	-0.130209	-0.061059	-0.0583695	-0.123491	-0.0764073	-0.0675818
0.268	-0.129406	-0.0603788	-0.0573065	-0.124816	-0.0777197	-0.0675718
0.269	-0.127778	-0.0596551	-0.0567073	-0.125939	-0.0790014	-0.0677623
0.27	-0.125498	-0.0587522	-0.0565165	-0.126752	-0.0800676	-0.0681941
0.271	-0.1229	-0.0576137	-0.0565762	-0.126972	-0.0807801	-0.0687949
0.272	-0.120201	-0.0562639	-0.0565939	-0.126245	-0.0810117	-0.0694525
0.273	-0.117423	-0.0547018	-0.0561866	-0.124437	-0.08068	-0.0700362
0.274	-0.11459	-0.0528107	-0.0550363	-0.121693	-0.0798325	-0.0703586
0.275	-0.111645	-0.0504062	-0.0531486	-0.118186	-0.0786203	-0.0703476
0.276	-0.108247	-0.0473011	-0.0508726	-0.11404	-0.0772124	-0.0701948
0.277	-0.103881	-0.0434145	-0.0486583	-0.109406	-0.075824	-0.0699988
0.278	-0.0981814	-0.0388397	-0.0468689	-0.104391	-0.0746805	-0.0694975
0.279	-0.0910351	-0.0336148	-0.0457154	-0.0991285	-0.0738695	-0.0683644
0.28	-0.0823297	-0.0275774	-0.0453028	-0.0938795	-0.0733745	-0.0664965
0.281	-0.0718636	-0.0205657	-0.0456814	-0.0889225	-0.0732001	-0.0639518
0.282	-0.0595959	-0.0125291	-0.0467701	-0.0843849	-0.0733354	-0.0607969
0.283	-0.0456962	-0.00338476	-0.0483751	-0.0801434	-0.073689	-0.0570603
0.284	-0.0304905	0.0070373	-0.0503419	-0.0759987	-0.0742153	-0.0527153
0.285	-0.0144556	0.0187829	-0.0525494	-0.0719093	-0.0750171	-0.0476648
0.286	0.00194814	0.031592	-0.054831	-0.0679885	-0.0761744	-0.04177
0.287	0.0183337	0.0451884	-0.0569798	-0.0645421	-0.0775261	-0.0348423
0.288	0.0343872	0.0596168	-0.0588391	-0.0620144	-0.0786443	-0.0267117
0.289	0.0500757	0.0749454	-0.060347	-0.0607356	-0.0790855	-0.0173544
0.29	0.06585	0.09097	-0.0613431	-0.0609233	-0.0786247	-0.0068185
0.291	0.0828058	0.107441	-0.0614922	-0.0628165	-0.0771967	0.00482144
0.292	0.102801	0.124254	-0.0605829	-0.0665673	-0.0747385	0.0173767
0.293	0.128329	0.14127	-0.0586626	-0.0722261	-0.0710985	0.030613
0.294	0.162004	0.158054	-0.0557788	-0.0799146	-0.0661813	0.0444241
0.295	0.205797	0.173834	-0.0519095	-0.0898183	-0.0601262	0.0588175
0.296	0.260511	0.187616	-0.047144	-0.102239	-0.0531647	0.0736653
0.297	0.32548	0.198324	-0.0415763	-0.117831	-0.0453749	0.0885866
0.298	0.398092	0.205163	-0.0352169	-0.137348	-0.036651	0.103078
0.299	0.473686	0.207883	-0.0281518	-0.16105	-0.0268997	0.116512
0.3	0.546335	0.206728	-0.0205014	-0.188605	-0.0161958	0.127999
0.301	0.61004	0.202515	-0.0121979	-0.21919	-0.00470455	0.136493
0.302	0.659938	0.196867	-0.00291028	-0.251479	0.00740517	0.141015
0.303	0.693393	0.192387	0.00778804	-0.28386	0.0198529	0.140602
0.304	0.710764	0.192668	0.0201325	-0.314761	0.032255	0.134343
0.305	0.715385	0.2018	0.0339765	-0.342745	0.0442845	0.121736
0.306	0.712449	0.223463	0.0488778	-0.366398	0.055576	0.1028
0.307	0.707227	0.260263	0.0643604	-0.383993	0.0655252	0.0781631
0.308	0.703252	0.313513	0.0800401	-0.392779	0.0733324	0.0494387
0.309	0.701509	0.383086	0.0956585	-0.388507	0.0781742	0.0194341
0.31	0.701514	0.46706	0.111071	-0.366482	0.0792722	-0.00802322
0.311	0.703588	0.561546	0.125953	-0.324028	0.0758127	-0.0284066
0.312	0.710381	0.661148	0.139562	-0.262003	0.0669163	-0.0369493
0.313	0.726391	0.759988	0.15106	-0.183694	0.0519578	-0.0292747
0.314	0.755992	0.85285	0.159858	-0.0925024	0.0309636	-0.00196253
0.315	0.801717	0.93609	0.165461	0.00917953	0.00459814	0.0470567
0.316	0.86388	1.008	0.167298	0.119113	-0.0258705	0.11841
0.317	0.940945	1.06854	0.165036	0.233845	-0.0582719	0.21167
0.318	1.02961	1.11853	0.159039	0.348801	-0.089472	0.325432
0.319	1.12456	1.15921	0.150558	0.459691	-0.115721	0.456461
0.32	1.2182	1.19238	0.141841	0.563057	-0.132918	0.598845
0.321	1.30066	1.22046	0.136102	0.655285	-0.13693	0.744185
0.322	1.36073	1.24539	0.137194	0.732459	-0.124375	0.882893
0.323	1.38873	1.26706	0.149218	0.792338	-0.0934564	1.0062
0.324	1.38042	1.2824	0.176005	0.836129	-0.0442275	1.10808
0.325	1.33942	1.28564	0.220413	0.868162	0.0218274	1.18621
0.326	1.27551	1.27058	0.283732	0.8944	0.102814	1.24192
0.327	1.19988	1.23411	0.365293	0.9205	0.197641	1.27962
0.328	1.12067	1.17815	0.462297	0.949604	0.306283	1.30533
0.329	1.04154	1.10854	0.570063	0.9815	0.428541	1.32421
0.33	0.962606	1.03213	0.682701	1.01387	0.5622	1.33874
0.331	0.882288	0.95446	0.794044	1.04387	0.702088	1.34932
0.332	0.798561	0.878847	0.898756	1.06874	0.840923	1.35571
0.333	0.709647	0.80659	0.993235	1.08584	0.971106	1.3577
0.334	0.614375	0.737473	1.07577	1.09277	1.08588	1.35568
0.335	0.512037	0.670231	1.14603	1.08721	1.17975	1.35106
0.336	0.401774	0.602899	1.20454	1.06659	1.24979	1.34522
0.337	0.282078	0.533137	1.25252	1.02776	1.29769	1.33816
0.338	0.150525	0.458502	1.29142	0.966816	1.32982	1.3287
0.339	0.00382841	0.376268	1.32175	0.879162	1.35423	1.31566
0.34	-0.161253	0.282927	1.34255	0.759848	1.37664	1.29861
0.341	-0.346284	0.174021	1.35147	0.604187	1.39753	1.27759
0.342	-0.549514	0.0446722	1.34467	0.408706	1.4124	1.25216
0.343	-0.765095	-0.109293	1.31786	0.172717	1.41569	1.22082
0.344	-0.983552	-0.289913	1.26872	-0.0997522	1.40537	1.18088
0.345	-1.19305	-0.495686	1.19908	-0.399018	1.38416	1.12843
0.346	-1.38108	-0.720689	1.11474	-0.710515	1.35684	1.05837
0.347	-1.53621	-0.954835	1.02295	-1.0169	1.32721	0.964798
0.348	-1.64972	-1.18511	0.929885	-1.30068	1.29744	0.841601
0.349	-1.71653	-1.39734	0.839549	-1.54663	1.26882	0.682843
0.35	-1.73556	-1.57815	0.753743	-1.74326	1.24214	0.48342
0.351	-1.70945	-1.71683	0.672628	-1.88346	1.21734	0.240659
0.352	-1.6437	-1.80673	0.595429	-1.96464	1.19312	-0.0435625
0.353	-1.54563	-1.84579	0.520997	-1.98826	1.16684	-0.361492
0.354	-1.42346	-1.83607	0.44794	-1.95916	1.13457	-0.699498
0.355	-1.28567	-1.7828	0.374354	-1.88485	1.09109	-1.03946
0.356	-1.1403	-1.69343	0.297628	-1.77439	1.03009	-1.36146
0.357	-0.994306	-1.57682	0.214483	-1.6374	0.944597	-1.64686
0.358	-0.853271	-1.44226	0.120965	-1.48314	0.827351	-1.88048
0.359	-0.721409	-1.29848	0.0124196	-1.32018	0.671344	-2.05199
0.36	-0.601617	-1.15324	-0.115963	-1.15621	0.47102	-2.1565
0.361	-0.495563	-1.01297	-0.267797	-0.99783	0.224219	-2.19454
0.362	-0.403799	-0.88246	-0.443887	-0.8501	-0.0658925	-2.17128
0.363	-0.325744	-0.764992	-0.641123	-0.716462	-0.389884	-2.09535
0.364	-0.259949	-0.662477	-0.852302	-0.598819	-0.732598	-1.97751
0.365	-0.204807	-0.575442	-1.06682	-0.497919	-1.07498	-1.82945
0.366	-0.15896	-0.503162	-1.27201	-0.413699	-1.39676	-1.6627
0.367	-0.121124	-0.444084	-1.45493	-0.345454	-1.67938	-1.48783
0.368	-0.0899392	-0.396388	-1.60433	-0.291893	-1.90824	-1.31386
0.369	-0.0640048	-0.358303	-1.71197	-0.25105	-2.07381	-1.14793
0.37	-0.0420007	-0.328162	-1.77329	-0.220344	-2.1719	-0.995265
0.371	-0.0229797	-0.304491	-1.78763	-0.196981	-2.20331	-0.859361
0.372	-0.006414	-0.285991	-1.75785	-0.178353	-2.17324	-0.741985
0.373	0.00824177	-0.271444	-1.68959	-0.162255	-2.09035	-0.643392
0.374	0.0216717	-0.259755	-1.59047	-0.147144	-1.96555	-0.562738
0.375	0.0343077	-0.250091	-1.46923	-0.132314	-1.81072	-0.49836
0.376	0.0461789	-0.241945	-1.33442	-0.117771	-1.63749	-0.447945
0.377	0.0571545	-0.23498	-1.19382	-0.103933	-1.45645	-0.408962
0.378	0.0671788	-0.228867	-1.05548	-0.0912948	-1.27663	-0.379096
0.379	0.076336	-0.223306	-0.926849	-0.0803255	-1.10523	-0.356362
0.38	0.0848631	-0.218084	-0.812461	-0.0715366	-0.947485	-0.339044
0.381	0.0931135	-0.213059	-0.713709	-0.065313	-0.806781	-0.325697
0.382	0.101239	-0.208161	-0.62998	-0.0617025	-0.684855	-0.315117
0.383	0.108939	-0.203409	-0.559615	-0.06051	-0.581996	-0.306317
0.384	0.115898	-0.198869	-0.500624	-0.0613406	-0.49739	-0.298625
0.385	0.122427	-0.194574	-0.451111	-0.0634193	-0.429518	-0.291699
0.386	0.129509	-0.190604	-0.409431	-0.065722	-0.37641	-0.285357
0.387	0.138246	-0.187096	-0.374096	-0.0674468	-0.335757	-0.279409
0.388	0.149099	-0.184096	-0.343817	-0.0681938	-0.30516	-0.273696
0.389	0.161667	-0.181589	-0.317653	-0.0678795	-0.28232	-0.268213
0.39	0.175162	-0.179579	-0.294896	-0.0666135	-0.265118	-0.263015
0.391	0.188949	-0.177937	-0.27487	-0.0644494	-0.251812	-0.258091
0.392	0.202667	-0.176388	-0.257036	-0.0612397	-0.241158	-0.253446
0.393	0.215929	-0.174754	-0.241174	-0.0566673	-0.232341	-0.249159
0.394	0.227999	-0.173094	-0.227285	-0.0503103	-0.224908	-0.245336
0.395	0.237942	-0.171607	-0.215346	-0.0418597	-0.218594	-0.242021
0.396	0.245176	-0.170418	-0.205212	-0.0313375	-0.213156	-0.239166
0.397	0.249715	-0.169443	-0.196736	-0.0190976	-0.208305	-0.236583
0.398	0.251974	-0.168503	-0.189874	-0.00575139	-0.20376	-0.234006
0.399	0.252745	-0.167461	-0.184598	0.00796152	-0.199405	-0.231375
0.4	0.253184	-0.166276	-0.180762	0.0213541	-0.195304	-0.22882
0.401	0.254426	-0.165002	-0.17805	0.0339228	-0.191595	-0.226368
0.402	0.257158	-0.163666	-0.176128	0.0454111	-0.188368	-0.223961
0.403	0.261589	-0.162205	-0.174781	0.0558242	-0.185483	-0.22159
0.404	0.26765	-0.16054	-0.173813	0.0654632	-0.182651	-0.219198
0.405	0.275095	-0.158677	-0.172931	0.074805	-0.179703	-0.216613
0.406	0.283479	-0.156647	-0.171893	0.0842147	-0.176581	-0.213785
0.407	0.292125	-0.154334	-0.170718	0.0939694	-0.173324	-0.210875
0.408	0.300153	-0.151584	-0.169599	0.104402	-0.170073	-0.207959
0.409	0.306665	-0.148458	-0.168649	0.115655	-0.16705	-0.2049
0.41	0.311104	-0.145188	-0.167802	0.127517	-0.164486	-0.201544
0.411	0.313417	-0.142017	-0.166882	0.139683	-0.162444	-0.197786
0.412	0.313875	-0.139075	-0.165751	0.151946	-0.160809	-0.193607
0.413	0.312946	-0.136315	-0.164387	0.164125	-0.159458	-0.189212
0.414	0.311107	-0.133598	-0.162821	0.175907	-0.158337	-0.184919
0.415	0.30879	-0.130787	-0.16106	0.186801	-0.157384	-0.180923
0.416	0.306587	-0.127831	-0.159052	0.196232	-0.156463	-0.17725
0.417	0.305238	-0.124825	-0.156703	0.20371	-0.155383	-0.173753
0.418	0.305501	-0.121891	-0.154031	0.208936	-0.154028	-0.170207
0.419	0.308077	-0.119086	-0.151215	0.211939	-0.152431	-0.166574
0.42	0.313432	-0.116441	-0.148488	0.213125	-0.150703	-0.16295
0.421	0.321673	-0.1139	-0.146072	0.213099	-0.148925	-0.159348
0.422	0.332418	-0.111306	-0.144023	0.212571	-0.147117	-0.155728
0.423	0.344707	-0.108598	-0.142175	0.212387	-0.145185	-0.152014
0.424	0.357299	-0.105872	-0.14034	0.213309	-0.142877	-0.148025
0.425	0.369194	-0.103199	-0.138452	0.215801	-0.139926	-0.143572
0.426	0.379975	-0.100567	-0.136548	0.220099	-0.136267	-0.138706
0.427	0.389724	-0.0979919	-0.134585	0.226333	-0.132083	-0.133744
0.428	0.398687	-0.0954678	-0.132303	0.234439	-0.127669	-0.128999
0.429	0.407052	-0.0928734	-0.129503	0.244018	-0.123267	-0.124512
0.43	0.414827	-0.0899997	-0.126261	0.254475	-0.119099	-0.120104
0.431	0.421732	-0.0866736	-0.122771	0.265372	-0.115351	-0.11567
0.432	0.42716	-0.0829411	-0.119194	0.276535	-0.112047	-0.111269
0.433	0.430342	-0.0789864	-0.115683	0.287839	-0.10913	-0.10691
0.434	0.430951	-0.0749074	-0.112364	0.299066	-0.106556	-0.102492
0.435	0.42959	-0.0708084	-0.109337	0.309913	-0.104197	-0.097908
0.436	0.427451	-0.0669312	-0.10668	0.319945	-0.101764	-0.0931527
0.437	0.425621	-0.0634941	-0.10429	0.328633	-0.0989057	-0.0883418
0.438	0.424742	-0.0605448	-0.101914	0.335739	-0.0953832	-0.0835856
0.439	0.425064	-0.0580377	-0.099437	0.342027	-0.0910737	-0.078972
0.44	0.426633	-0.055899	-0.0969361	0.349509	-0.0859149	-0.0746428
0.441	0.429644	-0.0539637	-0.0944724	0.360567	-0.0799564	-0.0706506
0.442	0.434773	-0.0520582	-0.0919238	0.376629	-0.0733819	-0.0668823
0.443	0.442934	-0.0501303	-0.0890007	0.397442	-0.0664692	-0.0632831
0.444	0.454533	-0.048174	-0.0854455	0.42123	-0.0595499	-0.0599473
0.445	0.469012	-0.0461616	-0.0812556	0.445537	-0.0529026	-0.0569079
0.446	0.484964	-0.0441139	-0.0767158	0.468073	-0.0467155	-0.0540393
0.447	0.500616	-0.0421499	-0.0721743	0.487307	-0.0411185	-0.0511965
0.448	0.514734	-0.0403447	-0.0678295	0.502926	-0.0361976	-0.0483351
0.449	0.527787	-0.0386481	-0.0638023	0.515668	-0.0320031	-0.0455115
0.45	0.542015	-0.0369843	-0.0601927	0.526523	-0.0284948	-0.0427939
0.451	0.559667	-0.03531	-0.05676	0.536246	-0.0255217	-0.0402303
0.452	0.580889	-0.0336537	-0.0532069	0.545392	-0.0229267	-0.0378851
0.453	0.60322	-0.0321034	-0.0502453	0.554331	-0.0206537	-0.0357767
0.454	0.62304	-0.0306868	-0.0492029	0.563118	-0.0186675	-0.0337916
0.455	0.637928	-0.0293635	-0.0505369	0.571466	-0.0168126	-0.0316552
0.456	0.648232	-0.0281854	-0.0535965	0.578816	-0.0148507	-0.0290477
0.457	0.65649	-0.0273098	-0.0572114	0.584456	-0.012597	-0.0259263
0.458	0.665483	-0.0268441	-0.0602013	0.587776	-0.00995211	-0.0226502
0.459	0.676772	-0.0268084	-0.0617723	0.58852	-0.00688512	-0.0196622
0.46	0.689979	-0.0271563	-0.0616274	0.586912	-0.00348168	-0.0171398
0.461	0.702735	-0.0278182	-0.0597766	0.583578	9.57744e-05	-0.0150735
0.462	0.712298	-0.028821	-0.0563837	0.579299	0.00370239	-0.0135
0.463	0.718696	-0.0301801	-0.0518445	0.574711	0.00725108	-0.0124052
0.464	0.726244	-0.0316987	-0.0466293	0.570138	0.0107318	-0.011676
0.465	0.740974	-0.0330861	-0.0409975	0.565749	0.0141083	-0.0112384
0.466	0.766339	-0.0342173	-0.0351149	0.561693	0.0172084	-0.0109757
0.467	0.800995	-0.0352447	-0.0292142	0.557939	0.0198543	-0.0106829
0.468	0.839575	-0.0363873	-0.0235657	0.554203	0.0220064	-0.0102507
0.469	0.875251	-0.037616	-0.0184547	0.550094	0.0237197	-0.00973831
0.47	0.902225	-0.0387499	-0.0141785	0.545231	0.02505	-0.00924796
0.471	0.916987	-0.0397863	-0.0110298	0.539368	0.0259999	-0.00882397
0.472	0.918431	-0.0408862	-0.00914063	0.532482	0.0265742	-0.00844281
0.473	0.90718	-0.0421827	-0.00837775	0.524677	0.0268422	-0.00804702
0.474	0.884917	-0.0437453	-0.00847707	0.516107	0.0269092	-0.00767626
0.475	0.854247	-0.045513	-0.00916848	0.507012	0.0269195	-0.00758946
0.476	0.818551	-0.0473147	-0.0102013	0.497723	0.0269794	-0.00800627
0.477	0.781396	-0.0490571	-0.0113427	0.488643	0.0270044	-0.00875926
0.478	0.745623	-0.0507618	-0.0124314	0.480162	0.0267693	-0.00947872
0.479	0.712693	-0.0524794	-0.0134705	0.4726	0.0260875	-0.00991517
0.48	0.682922	-0.0541697	-0.0145697	0.466236	0.024932	-0.0100821
0.481	0.656217	-0.0556796	-0.0157317	0.461284	0.0234605	-0.0102405
0.482	0.632769	-0.0569761	-0.0167823	0.457995	0.0219259	-0.0105491
0.483	0.613541	-0.0581733	-0.0176341	0.456685	0.0205546	-0.0108949
0.484	0.599959	-0.0592953	-0.0183732	0.457391	0.0194993	-0.0111533
0.485	0.592906	-0.0602837	-0.0190289	0.459798	0.0188525	-0.0113226
0.486	0.592022	-0.0611395	-0.019642	0.463463	0.0186455	-0.0114581
0.487	0.595708	-0.0619461	-0.0203369	0.467867	0.0188627	-0.0116683
0.488	0.601676	-0.0627247	-0.0210674	0.472418	0.0194335	-0.0120474
0.489	0.607884	-0.0632694	-0.0216876	0.47662	0.0202005	-0.0125072
0.49	0.613171	-0.0633122	-0.0223458	0.480277	0.021006	-0.0128941
0.491	0.617043	-0.0627401	-0.0235949	0.483497	0.0217866	-0.0132011
0.492	0.619197	-0.0615784	-0.0260158	0.486576	0.0225751	-0.0134171
0.493	0.61942	-0.0600316	-0.0297995	0.489941	0.0234657	-0.0133293
0.494	0.6175	-0.0585068	-0.0349274	0.49414	0.0244848	-0.0126865
0.495	0.613182	-0.0574414	-0.0412595	0.499745	0.0254989	-0.0115113
0.496	0.606382	-0.0570973	-0.0482275	0.507207	0.0263363	-0.0100993
0.497	0.597303	-0.0575172	-0.0550233	0.516714	0.0269508	-0.00876836
0.498	0.586363	-0.0586812	-0.0609719	0.528042	0.0275107	-0.00770398
0.499	0.574062	-0.0605549	-0.0656387	0.540425	0.0282698	-0.00694922
0.5	0.560831	-0.062992	-0.06882	0.552639	0.0292635	-0.00651386
0.501	0.547116	-0.0657488	-0.0704343	0.563353	0.030297	-0.00646242
0.502	0.533499	-0.0684633	-0.0704865	0.571471	0.0311376	-0.00688948
0.503	0.520458	-0.0707305	-0.0691739	0.576188	0.0316239	-0.00787061
0.504	0.508166	-0.0723905	-0.0670113	0.577045	0.0316732	-0.00933753
0.505	0.496682	-0.0735273	-0.0647218	0.57415	0.031229	-0.0110363
0.506	0.486138	-0.074274	-0.0628526	0.568248	0.0303086	-0.0126798
0.507	0.476589	-0.0747514	-0.0615192	0.56051	0.0291027	-0.0140553
0.508	0.467902	-0.0750492	-0.0605643	0.552308	0.0279122	-0.0150684
0.509	0.46002	-0.0752211	-0.0598016	0.545221	0.0269338	-0.0157054
0.51	0.45318	-0.075246	-0.0590093	0.540848	0.0262329	-0.0158768
0.511	0.447724	-0.0750693	-0.0580253	0.5403	0.025838	-0.0154386
0.512	0.443897	-0.0746745	-0.056908	0.543931	0.0256695	-0.0143809
0.513	0.441869	-0.0740361	-0.0558467	0.551353	0.0255548	-0.0128726
0.514	0.441684	-0.0731549	-0.0550775	0.56167	0.0254421	-0.0112583
0.515	0.443094	-0.072129	-0.0548409	0.573709	0.025413	-0.0100092
0.516	0.445674	-0.0710647	-0.0552393	0.586155	0.0254561	-0.00942233
0.517	0.449187	-0.0699746	-0.0561623	0.597727	0.0254807	-0.00939908
0.518	0.453507	-0.0688242	-0.0573628	0.607258	0.0254481	-0.0096159
0.519	0.458255	-0.0675817	-0.0586073	0.613719	0.025416	-0.00974509
0.52	0.46286	-0.066231	-0.0597663	0.616428	0.0255747	-0.00951771
0.521	0.466856	-0.0648167	-0.0607741	0.615173	0.0260736	-0.00878494
0.522	0.470027	-0.0633929	-0.061611	0.610181	0.0269125	-0.00753794
0.523	0.472404	-0.0619265	-0.0623147	0.602064	0.0279746	-0.00584069
0.524	0.47415	-0.0603402	-0.0629584	0.591653	0.0289986	-0.00375714
0.525	0.475501	-0.0586049	-0.0636149	0.579805	0.0297277	-0.00135152
0.526	0.476666	-0.0567695	-0.0642396	0.567329	0.0301436	0.00122063
0.527	0.477763	-0.0549342	-0.0646433	0.554927	0.030443	0.00370217
0.528	0.478945	-0.0531469	-0.0646648	0.543156	0.0307983	0.00581498
0.529	0.480449	-0.0514203	-0.0643356	0.532267	0.0313114	0.00738961
0.53	0.482532	-0.0498998	-0.0638197	0.522102	0.0321028	0.00851965
0.531	0.485406	-0.0487405	-0.0631678	0.512403	0.0332216	0.00948429
0.532	0.489125	-0.0478592	-0.0622924	0.503288	0.034572	0.0104542
0.533	0.493588	-0.0470615	-0.0612197	0.495242	0.036	0.0113492
0.534	0.498623	-0.0462514	-0.0601665	0.488692	0.0374244	0.0120497
0.535	0.503987	-0.0453906	-0.0593066	0.483895	0.0389059	0.0127013
0.536	0.509444	-0.0444748	-0.058568	0.481081	0.0405384	0.0136424
0.537	0.514767	-0.043578	-0.0577245	0.480417	0.0422876	0.0150662
0.538	0.519643	-0.0427027	-0.0566564	0.481801	0.043983	0.0168667
0.539	0.523717	-0.0416792	-0.0554769	0.484698	0.0454169	0.0187581
0.54	0.526718	-0.0403613	-0.0544546	0.488273	0.0464256	0.020588
0.541	0.528629	-0.0387782	-0.0537831	0.491745	0.0469815	0.022466
0.542	0.529754	-0.0370956	-0.0533859	0.49468	0.0472696	0.0244523
0.543	0.530559	-0.0355685	-0.0530137	0.497024	0.0475875	0.0263521
0.544	0.531522	-0.0344614	-0.052406	0.498951	0.0481782	0.0279039
0.545	0.533104	-0.0338584	-0.0514186	0.500611	0.0491206	0.0289424
0.546	0.535624	-0.0335951	-0.0501447	0.501961	0.0503135	0.0294618
0.547	0.539084	-0.0334483	-0.0487832	0.502912	0.0516194	0.0296166
0.548	0.543105	-0.0333203	-0.0474577	0.50353	0.0530195	0.029553
0.549	0.547017	-0.0331779	-0.0462337	0.503998	0.0545582	0.0292506
0.55	0.550148	-0.0329571	-0.0451167	0.504413	0.0561383	0.0286416
0.551	0.55228	-0.0325988	-0.0440028	0.504649	0.0575737	0.0278598
0.552	0.553948	-0.0320505	-0.0427847	0.504426	0.05884	0.0271731
0.553	0.556186	-0.031304	-0.0414659	0.503362	0.0600176	0.0267565
0.554	0.560015	-0.0304692	-0.0400852	0.501024	0.0611262	0.0266801
0.555	0.566	-0.0296655	-0.0386296	0.497126	0.0621935	0.0269039
0.556	0.573897	-0.0288819	-0.0370254	0.49161	0.0633182	0.0272686
0.557	0.582693	-0.028073	-0.0351687	0.484537	0.0645522	0.0276437
0.558	0.590958	-0.0273068	-0.0330186	0.476067	0.0658135	0.0279974
0.559	0.597129	-0.0265982	-0.0306426	0.46653	0.0669959	0.0283816
0.56	0.599764	-0.0257276	-0.0281733	0.4564	0.0680409	0.0288328
0.561	0.597706	-0.0244835	-0.0257438	0.446191	0.068871	0.0292366
0.562	0.590063	-0.0228733	-0.0234683	0.436327	0.0693919	0.0294035
0.563	0.576336	-0.0210465	-0.0214952	0.42716	0.069598	0.0291576
0.564	0.556678	-0.0192281	-0.0200374	0.419063	0.0696086	0.0283963
0.565	0.531736	-0.0176085	-0.0192761	0.412384	0.0695283	0.0272297
0.566	0.502123	-0.0162184	-0.0192166	0.407366	0.0693345	0.0259827
0.567	0.468369	-0.015009	-0.01968	0.404185	0.0689462	0.0250192
0.568	0.431233	-0.0140098	-0.0204417	0.40307	0.0683188	0.0245578
0.569	0.39166	-0.0133088	-0.0213319	0.404315	0.0675676	0.0246281
0.57	0.350641	-0.0129398	-0.022141	0.40799	0.0669984	0.0251393
0.571	0.309294	-0.0128258	-0.0225649	0.413614	0.0668329	0.0259756
0.572	0.268885	-0.012798	-0.0224399	0.420231	0.0670718	0.0270564
0.573	0.230566	-0.012689	-0.0218957	0.426748	0.0676815	0.0282366
0.574	0.195194	-0.0123089	-0.021152	0.432183	0.0685946	0.029328
0.575	0.163497	-0.0114839	-0.0203217	0.435807	0.0696432	0.0302651
0.576	0.136121	-0.0103038	-0.019396	0.437305	0.0706951	0.0309457
0.577	0.11339	-0.00908017	-0.0182718	0.436923	0.0716481	0.0311386
0.578	0.0952466	-0.00809407	-0.0168362	0.435586	0.0723501	0.0307929
0.579	0.0813651	-0.00750071	-0.0150565	0.434713	0.0726937	0.0301286
0.58	0.0711944	-0.00727336	-0.0130544	0.435617	0.0726656	0.0293616
0.581	0.0639629	-0.00722449	-0.0110858	0.439004	0.0723392	0.0285643
0.582	0.0588061	-0.00713909	-0.00934618	0.44488	0.0718491	0.027765
0.583	0.0549859	-0.00689859	-0.00791601	0.452798	0.0713485	0.0270452
0.584	0.0519774	-0.00648484	-0.00680358	0.462234	0.0710316	0.0265504
0.585	0.0494467	-0.00592852	-0.00591139	0.472863	0.0710434	0.0264647
0.586	0.047325	-0.00535192	-0.00511578	0.484708	0.0713389	0.0269436
0.587	0.0458689	-0.00488049	-0.00437115	0.49813	0.0717752	0.028027
0.588	0.0455391	-0.00452238	-0.00369317	0.513314	0.0722694	0.0296442
0.589	0.046732	-0.00431186	-0.00309322	0.529635	0.0727618	0.0316409
0.59	0.0495991	-0.00435923	-0.00257337	0.545762	0.073106	0.0337192
0.591	0.0540877	-0.00472424	-0.00218027	0.560308	0.073118	0.0354512
0.592	0.0598914	-0.00540585	-0.00196032	0.572376	0.0727556	0.0364973
0.593	0.0663803	-0.00632289	-0.00187935	0.581755	0.0721436	0.0367785
0.594	0.0728544	-0.00898896	-0.00182109	0.588787	0.0714296	0.0364157
0.595	0.0787565	-0.0185086	-0.00160382	0.594185	0.0707557	0.0355648
0.596	0.0835566	-0.0395141	-0.0010761	0.599086	0.0701891	0.0343055
0.597	0.086737	-0.070382	-0.000318495	0.605	0.0695983	0.0327574
0.598	0.0879856	-0.104482	0.000392957	0.613306	0.0688268	0.0311952
0.599	0.087261	-0.134737	0.000923263	0.624729	0.0678889	0.0298588
0.6	0.0847499	-0.156054	0.00137518	0.639261	0.0669104	0.0287434
0.601	0.0808693	-0.165862	0.00185146	0.656264	0.0660157	0.0276394
0.602	0.0762299	-0.16385	0.00233338	0.67469	0.0652511	0.0263302
0.603	0.0714073	-0.151508	0.00275843	0.693427	0.0646487	0.0247807
0.604	0.0667556	-0.131499	0.003021	0.711587	0.0643433	0.0231661
0.605	0.0625702	-0.1068	0.00295889	0.728629	0.0644437	0.0217918
0.606	0.0592601	-0.0800387	0.00246452	0.744354	0.0649066	0.0209234
0.607	0.0573269	-0.0533213	0.00162054	0.758952	0.0655791	0.0205765
0.608	0.0573691	-0.0284204	0.000725925	0.772966	0.0661921	0.0205901
0.609	0.060062	-0.0068916	7.80793e-05	0.787106	0.066478	0.0208738
0.61	0.0659432	0.0102116	-0.000208842	0.802237	0.0663356	0.0214217
0.611	0.0751609	0.0225915	-0.000141943	0.81925	0.0657019	0.0221969
0.612	0.0873632	0.030539	0.000270058	0.838727	0.0645025	0.023135
0.613	0.101751	0.0346148	0.00106245	0.860679	0.0629127	0.0240729
0.614	0.11728	0.0354522	0.00218805	0.884249	0.0613772	0.0247029
0.615	0.132778	0.033702	0.00340675	0.907672	0.0602387	0.024829
0.616	0.146933	0.0300074	0.00438384	0.92868	0.059571	0.0244895
0.617	0.158489	0.0250253	0.00486991	0.944944	0.0593101	0.0238309
0.618	0.166671	0.0194016	0.00476872	0.954457	0.059325	0.0230113
0.619	0.171351	0.0136303	0.00410318	0.955846	0.0595051	0.0221226
0.62	0.172784	0.00800633	0.00301021	0.948366	0.0598313	0.021284
0.621	0.171328	0.00271571	0.00173423	0.931828	0.0602478	0.0207121
0.622	0.167466	-0.00203154	0.000566625	0.906642	0.0605886	0.0205436
0.623	0.161763	-0.00596868	-0.000373113	0.873806	0.0607123	0.0206975
0.624	0.154787	-0.00897912	-0.00127401	0.834786	0.0606366	0.0209397
0.625	0.14714	-0.0112036	-0.0023576	0.791315	0.0605103	0.0210763
0.626	0.13934	-0.012801	-0.00362555	0.745201	0.0603889	0.0210707
0.627	0.131753	-0.0138182	-0.00491742	0.698299	0.0601308	0.0210777
0.628	0.124658	-0.0143498	-0.00607036	0.652479	0.0596222	0.0213366
0.629	0.118244	-0.0146099	-0.00703404	0.609532	0.0589699	0.0218832
0.63	0.11274	-0.0148094	-0.00778852	0.571029	0.0583466	0.0225262
0.631	0.108474	-0.0150642	-0.00824528	0.538156	0.0577807	0.0230842
0.632	0.105622	-0.015404	-0.00830187	0.511522	0.0572854	0.0234039
0.633	0.10422	-0.0157811	-0.007901	0.491115	0.0569362	0.0233065
0.634	0.104368	-0.0161193	-0.0071127	0.476443	0.0567209	0.022774
0.635	0.106123	-0.0163865	-0.00615917	0.466841	0.0565685	0.0220264
0.636	0.109368	-0.0165655	-0.00529533	0.46165	0.0564472	0.0212123
0.637	0.113943	-0.0166511	-0.0047903	0.46013	0.0563534	0.0202579
0.638	0.11977	-0.0166953	-0.00493152	0.461405	0.0562174	0.0191204
0.639	0.126697	-0.0166752	-0.00575202	0.464544	0.0559332	0.0178837
0.64	0.134299	-0.0164362	-0.00689662	0.468628	0.0555967	0.0166528
0.641	0.142017	-0.0159089	-0.00796583	0.472831	0.0554434	0.0154928
0.642	0.14951	-0.0152073	-0.00881	0.476486	0.0555187	0.0143895
0.643	0.156672	-0.0145757	-0.00939347	0.47909	0.055644	0.0133862
0.644	0.163373	-0.0142601	-0.0095343	0.480247	0.0555967	0.0126932
0.645	0.169423	-0.0142786	-0.00898162	0.479608	0.0551867	0.0124407
0.646	0.174567	-0.0144292	-0.00768239	0.476966	0.0543158	0.0125376
0.647	0.17848	-0.014524	-0.00580193	0.472338	0.0530584	0.0128711
0.648	0.180978	-0.0145496	-0.00357597	0.465917	0.0516277	0.0134304
0.649	0.182116	-0.0146406	-0.00131675	0.45802	0.0502453	0.0142696
0.65	0.182167	-0.0148945	0.000582905	0.44894	0.0490805	0.0153455
0.651	0.181615	-0.0152837	0.00189624	0.438858	0.0482284	0.016438
0.652	0.180915	-0.0156703	0.00259918	0.427972	0.0476325	0.0173877
0.653	0.180234	-0.0158282	0.00264893	0.416516	0.0471715	0.0182067
0.654	0.179604	-0.01562	0.00193973	0.404576	0.0468328	0.0189147
0.655	0.17912	-0.0151229	0.000375325	0.392136	0.046634	0.0194397
0.656	0.178691	-0.0144578	-0.00194766	0.379406	0.0465483	0.0196745
0.657	0.177965	-0.0136903	-0.00457432	0.366859	0.0465924	0.0196364
0.658	0.176634	-0.0129237	-0.00692818	0.355079	0.0467529	0.0194942
0.659	0.174506	-0.0122676	-0.00874007	0.344705	0.0468925	0.0194103
0.66	0.171452	-0.0118103	-0.0100972	0.336325	0.0469158	0.0194911
0.661	0.167377	-0.0116635	-0.0111386	0.330378	0.0468865	0.0197396
0.662	0.162225	-0.0118744	-0.0118791	0.327134	0.0468799	0.0199555
0.663	0.156152	-0.0122523	-0.012398	0.326711	0.0469032	0.0199319
0.664	0.149541	-0.0124134	-0.0129768	0.32901	0.0470077	0.0196691
0.665	0.142748	-0.012157	-0.0137549	0.333554	0.0471665	0.0192868
0.666	0.135983	-0.0116562	-0.0144847	0.339613	0.0471254	0.0189697
0.667	0.129424	-0.0111918	-0.01488	0.34639	0.0467034	0.0188885
0.668	0.12326	-0.0109078	-0.0149574	0.352975	0.0459979	0.0190486
0.669	0.117596	-0.0108595	-0.0148664	0.358471	0.0452042	0.0193835
0.67	0.112352	-0.0110458	-0.0145933	0.362227	0.0444823	0.0198339
0.671	0.107316	-0.0113376	-0.0140213	0.363847	0.0439131	0.0203496
0.672	0.102387	-0.0116011	-0.0131493	0.363122	0.0434993	0.0209976
0.673	0.0976183	-0.0118514	-0.0120963	0.360003	0.0432714	0.021847
0.674	0.0931201	-0.0121627	-0.010982	0.354655	0.0433479	0.0227735
0.675	0.0890445	-0.0124924	-0.00988917	0.347512	0.0438522	0.023583
0.676	0.0855986	-0.0126418	-0.00885132	0.339176	0.0447771	0.0242171
0.677	0.0829357	-0.0124741	-0.00782893	0.330214	0.0459408	0.0247388
0.678	0.0810196	-0.0120852	-0.00681157	0.321043	0.0471099	0.0252104
0.679	0.0796937	-0.0116461	-0.00590889	0.311953	0.0481029	0.025683
0.68	0.0788331	-0.0112609	-0.00521426	0.303145	0.0488202	0.0261765
0.681	0.0783692	-0.0109537	-0.00465832	0.294771	0.0492811	0.0265652
0.682	0.0782156	-0.0106709	-0.00411346	0.286993	0.0495602	0.0266509
0.683	0.0782916	-0.0103652	-0.00357092	0.279978	0.0496563	0.0263965
0.684	0.0786138	-0.0100254	-0.00311952	0.273885	0.0494767	0.0259817
0.685	0.0791615	-0.00960992	-0.00285271	0.268847	0.0490208	0.025607
0.686	0.0796961	-0.00903151	-0.00283843	0.264815	0.0484541	0.0252941
0.687	0.0799137	-0.00824226	-0.00312344	0.261553	0.0479041	0.0249239
0.688	0.079731	-0.00732985	-0.00376318	0.258806	0.0473935	0.0244348
0.689	0.0793244	-0.0064636	-0.00470607	0.256429	0.0469854	0.0238988
0.69	0.0788714	-0.00576961	-0.00576961	0.254432	0.0467974	0.0234137
0.691	0.0784133	-0.00535956	-0.00684902	0.252812	0.0468485	0.0230173
0.692	0.0780166	-0.0052973	-0.00796107	0.251398	0.0470009	0.0227345
0.693	0.0778098	-0.00545694	-0.00909557	0.249961	0.0471124	0.0226767
0.694	0.0778627	-0.00564188	-0.0100405	0.248388	0.0471619	0.0229814
0.695	0.0781835	-0.00576564	-0.0104875	0.246717	0.0472007	0.0235993
0.696	0.07877	-0.00583562	-0.0103327	0.245019	0.0473012	0.0242851
0.697	0.0795495	-0.00581335	-0.00967577	0.243314	0.0475539	0.024817
0.698	0.0803321	-0.0055621	-0.00863431	0.241552	0.0479435	0.0251405
0.699	0.0809724	-0.00501628	-0.00728399	0.239666	0.04825	0.0253028
0.7	0.081497	-0.00423764	-0.00569005	0.237676	0.04822	0.0253247
0.701	0.0819493	-0.00332327	-0.00398284	0.235723	0.0477648	0.0251397
0.702	0.0823186	-0.00237168	-0.00248596	0.233946	0.0469752	0.0246486
0.703	0.0827345	-0.00151407	-0.00156252	0.232362	0.0460663	0.023892
0.704	0.0834238	-0.000923458	-0.00126863	0.231008	0.0453151	0.023096
0.705	0.0844468	-0.000658532	-0.00142688	0.230004	0.0449355	0.0224898
0.706	0.0857042	-0.00064999	-0.00187455	0.229411	0.0448596	0.0221024
0.707	0.0870417	-0.000837675	-0.0024609	0.229257	0.044798	0.0218033
0.708	0.0883281	-0.00111447	-0.00304022	0.229536	0.0445924	0.0215514
0.709	0.0896221	-0.00136065	-0.0034708	0.230062	0.0442384	0.0214386
0.71	0.0910973	-0.00152938	-0.00360238	0.230587	0.0437135	0.0214903
0.711	0.092769	-0.0015469	-0.00339227	0.23096	0.0430265	0.0216562
0.712	0.0945247	-0.00129793	-0.00287607	0.231078	0.0423342	0.0219528
0.713	0.0963376	-0.000736995	-0.00207056	0.23089	0.0418807	0.0223905
0.714	0.098221	-3.89396e-05	-0.00100913	0.230383	0.0417559	0.0228348
0.715	0.100125	0.000424849	0.000316297	0.229607	0.0419218	0.0230625
0.716	0.10204	0.000411131	0.00198029	0.228811	0.0424517	0.0229826
0.717	0.104035	-1.92981e-05	0.00396784	0.22822	0.043438	0.022782
0.718	0.106161	-0.000671943	0.00614068	0.227672	0.0448193	0.022725
0.719	0.108341	-0.00132439	0.00833878	0.226899	0.0464778	0.0229046
0.72	0.110392	-0.00170289	0.0103488	0.225921	0.0482713	0.023231
0.721	0.112229	-0.00167887	0.0119474	0.224909	0.0499057	0.0234961
0.722	0.113917	-0.00138641	0.0130931	0.223925	0.051086	0.0235247
0.723	0.115496	-0.00103582	0.0138981	0.222978	0.0518111	0.0233362
0.724	0.116977	-0.000791895	0.0144382	0.222114	0.0523169	0.0231036
0.725	0.118425	-0.000711426	0.0147512	0.221383	0.0528871	0.0230228
0.726	0.119936	-0.000675247	0.0149285	0.220819	0.0536691	0.0231756
0.727	0.121578	-0.000478209	0.015055	0.220419	0.0544991	0.0234487
0.728	0.123411	-1.52532e-05	0.015143	0.220078	0.0550426	0.0237223
0.729	0.12553	0.000649095	0.015202	0.219693	0.0550479	0.0240298
0.73	0.128043	0.00137149	0.015262	0.219275	0.0544574	0.0243844
0.731	0.130918	0.00209172	0.0153298	0.218788	0.0534598	0.0246864
0.732	0.133934	0.00288316	0.0154509	0.218026	0.0523849	0.0248533
0.733	0.136909	0.00383444	0.01568	0.216838	0.0514584	0.0249257
0.734	0.139769	0.00500083	0.0159784	0.215298	0.0507206	0.0250285
0.735	0.14238	0.00637783	0.016265	0.213626	0.0501439	0.0251738
0.736	0.144668	0.00788427	0.0164693	0.212079	0.0496648	0.025259
0.737	0.146814	0.00948736	0.0165749	0.210829	0.0491956	0.0253098
0.738	0.149098	0.011149	0.0166506	0.209903	0.048729	0.0254428
0.739	0.1517	0.0127065	0.0167869	0.209119	0.0482934	0.0256174
0.74	0.15468	0.0140143	0.0170019	0.208234	0.0478621	0.025673
0.741	0.158004	0.0149908	0.0171682	0.20724	0.0474043	0.0255463
0.742	0.161621	0.0155225	0.0170543	0.206345	0.046988	0.0253088
0.743	0.165452	0.0155633	0.016559	0.205752	0.0468344	0.0251037
0.744	0.169376	0.015261	0.0158798	0.205493	0.0471401	0.0250595
0.745	0.173365	0.0148692	0.0152508	0.205407	0.0478521	0.02522
0.746	0.177446	0.0146143	0.01469	0.205235	0.04876	0.0255404
0.747	0.181494	0.0146411	0.0141922	0.204843	0.0496862	0.0258238
0.748	0.185261	0.014977	0.013839	0.204293	0.0504789	0.0258237
0.749	0.188609	0.0155759	0.0136921	0.20377	0.050972	0.0254728
0.75	0.191651	0.0164085	0.0138558	0.203479	0.0511097	0.0248905
0.751	0.194565	0.0174413	0.014425	0.203472	0.0509737	0.0242553
0.752	0.197318	0.0185985	0.0152345	0.203589	0.0506843	0.0236912
0.753	0.199677	0.0197627	0.0159977	0.203622	0.0504584	0.0233342
0.754	0.201416	0.0207809	0.0166317	0.203522	0.0505374	0.0233996
0.755	0.202466	0.0215417	0.0172024	0.203401	0.0509255	0.0239914
0.756	0.202863	0.0220549	0.0177547	0.203415	0.0513528	0.0250543
0.757	0.202668	0.0224502	0.0182876	0.203651	0.0515239	0.0265337
0.758	0.201988	0.0228922	0.0187907	0.203997	0.0514044	0.0283359
0.759	0.200965	0.0234076	0.0193211	0.204148	0.0512212	0.0302371
0.76	0.199764	0.0238927	0.0199484	0.203865	0.0512221	0.0319426
0.761	0.198558	0.0242667	0.0206341	0.203186	0.0515659	0.0331422
0.762	0.19742	0.0245003	0.0212935	0.202354	0.0522793	0.0335894
0.763	0.196315	0.02461	0.0219027	0.201588	0.0532029	0.0331997
0.764	0.195185	0.0245816	0.0225232	0.200957	0.0541099	0.032087
0.765	0.193992	0.0242942	0.0233008	0.200427	0.0548203	0.0305201
0.766	0.192685	0.0237099	0.024344	0.199888	0.0552335	0.028769
0.767	0.191189	0.0230101	0.0255991	0.199147	0.055356	0.0269948
0.768	0.189465	0.0224079	0.0269427	0.19814	0.0552756	0.0252759
0.769	0.187526	0.0220285	0.0282182	0.19708	0.0551126	0.0236826
0.77	0.185358	0.0218806	0.0291851	0.196151	0.0549127	0.022361
0.771	0.182937	0.0217894	0.0296758	0.19531	0.0546321	0.0215564
0.772	0.180239	0.0215495	0.0297054	0.194513	0.0542762	0.0214331
0.773	0.177204	0.0211324	0.0293103	0.193809	0.0538845	0.021901
0.774	0.173769	0.0206121	0.0284913	0.193135	0.0534479	0.0227515
0.775	0.169926	0.0200686	0.0273619	0.192332	0.0530181	0.0238134
0.776	0.165715	0.0196745	0.0261945	0.191318	0.0526871	0.0249202
0.777	0.161262	0.0196734	0.0252881	0.190062	0.0524134	0.0259222
0.778	0.156771	0.0202046	0.0247728	0.188615	0.0521328	0.0268045
0.779	0.152454	0.0211989	0.0246032	0.187216	0.0518851	0.0276359
0.78	0.148519	0.0224494	0.0247347	0.186203	0.0516817	0.0283485
0.781	0.145101	0.0238007	0.0251369	0.185862	0.0514978	0.0287911
0.782	0.142208	0.0252767	0.0256627	0.186276	0.0513552	0.0289574
0.783	0.139755	0.026994	0.0261091	0.187173	0.0512373	0.028955
0.784	0.137574	0.0288909	0.0263833	0.188109	0.0510904	0.0288527
0.785	0.135539	0.0306593	0.0264858	0.18885	0.050908	0.0286774
0.786	0.133727	0.0320122	0.0264157	0.189406	0.0507215	0.0285162
0.787	0.132309	0.0328065	0.0261788	0.18984	0.0506078	0.0285021
0.788	0.131373	0.0330341	0.0258099	0.19019	0.0506636	0.028694
0.789	0.130853	0.0328579	0.0253428	0.190473	0.0508939	0.0290762
0.79	0.130582	0.0324008	0.0248047	0.190685	0.0511691	0.0295871
0.791	0.130468	0.0316143	0.0242138	0.190797	0.0513008	0.0301393
0.792	0.130461	0.0305352	0.0236079	0.190751	0.0512161	0.0306528
0.793	0.130476	0.0293656	0.0230306	0.190522	0.0510404	0.0310343
0.794	0.130523	0.0282895	0.0224702	0.190282	0.0509414	0.0312429
0.795	0.130522	0.0273836	0.0219388	0.190388	0.0510079	0.0313308
0.796	0.130199	0.0266206	0.0215544	0.191053	0.0512521	0.0313401
0.797	0.129417	0.0260027	0.0214393	0.192185	0.0516436	0.0312553
0.798	0.128283	0.0256514	0.021536	0.193458	0.0521225	0.0310499
0.799	0.126881	0.0255889	0.021632	0.194562	0.0525748	0.0307637
0.8	0.125178	0.0255863	0.0215529	0.195456	0.0529295	0.030506
0.801	0.123165	0.0253772	0.02132	0.196251	0.0532127	0.0303071
0.802	0.120931	0.0249044	0.0211258	0.197058	0.0534597	0.0300472
0.803	0.118648	0.0243241	0.0210868	0.198074	0.0536888	0.0296249
0.804	0.11646	0.0238544	0.0211748	0.199476	0.0538695	0.0291104
0.805	0.114441	0.0235891	0.0213853	0.201231	0.0539697	0.0286835
0.806	0.1126	0.0234642	0.0217645	0.203164	0.0540841	0.0284675
0.807	0.110887	0.0234112	0.0223276	0.205117	0.0543104	0.0284418
0.808	0.109263	0.0234036	0.0230819	0.206998	0.0545471	0.0286036
0.809	0.107741	0.0234142	0.0240507	0.208813	0.0545525	0.0290295
0.81	0.106403	0.0234218	0.0252172	0.210702	0.0541552	0.029652
0.811	0.105358	0.0233935	0.0265224	0.212818	0.0533866	0.0302797
0.812	0.104585	0.0232986	0.0278676	0.215211	0.0523608	0.0307994
0.813	0.103929	0.0231505	0.0291082	0.217779	0.0511895	0.0312529
0.814	0.1032	0.0230002	0.0301232	0.220242	0.0500861	0.0318123
0.815	0.102257	0.0228934	0.0308697	0.222318	0.0492543	0.0326158
0.816	0.101124	0.0228177	0.0313919	0.223905	0.0487594	0.0336225
0.817	0.099869	0.0227124	0.0317461	0.225061	0.048617	0.0346899
0.818	0.0984816	0.0225184	0.0318993	0.22579	0.0487652	0.0357793
0.819	0.0969766	0.0222504	0.0318093	0.22593	0.049051	0.0369121
0.82	0.0953796	0.0220429	0.0316031	0.225416	0.0493716	0.038001
0.821	0.0936094	0.0220973	0.0315163	0.224374	0.049697	0.0389325
0.822	0.0915509	0.022569	0.0316308	0.222831	0.0500326	0.0395901
0.823	0.0892402	0.0234549	0.0318052	0.22077	0.0504238	0.0398414
0.824	0.0868285	0.0246182	0.0318894	0.21844	0.0508966	0.0396833
0.825	0.0844326	0.0259253	0.0319208	0.21625	0.0514098	0.0392246
0.826	0.0821681	0.027259	0.0320254	0.214443	0.0519573	0.0386189
0.827	0.0801644	0.0284819	0.0322543	0.212972	0.0526735	0.0380922
0.828	0.0784427	0.029563	0.032594	0.211603	0.0536386	0.0377925
0.829	0.0768905	0.030631	0.0329483	0.210193	0.0546808	0.0376528
0.83	0.075369	0.0317464	0.0332039	0.208697	0.0555851	0.0375233
0.831	0.0738279	0.0327722	0.0333635	0.207004	0.0562721	0.0373295
0.832	0.0723453	0.0335946	0.0334339	0.205095	0.0567348	0.0371151
0.833	0.0710522	0.0342646	0.033418	0.203159	0.0570407	0.036937
0.834	0.0700003	0.0348328	0.033481	0.201409	0.0573653	0.0367323
0.835	0.0691354	0.0353231	0.0338277	0.199927	0.0579065	0.0363726
0.836	0.0683901	0.0358321	0.0345244	0.198693	0.0587388	0.0358409
0.837	0.0676633	0.0364155	0.0355545	0.197668	0.0597658	0.0352855
0.838	0.0667937	0.0370128	0.036814	0.196702	0.0607828	0.0347793
0.839	0.0656981	0.0375281	0.0380845	0.195435	0.0616439	0.0341926
0.84	0.0644322	0.0379244	0.0391484	0.193551	0.0623795	0.0334919
0.841	0.0631075	0.0382477	0.0398564	0.191103	0.0630907	0.0329532
0.842	0.0617853	0.0385989	0.0401789	0.188442	0.0637625	0.0329059
0.843	0.0604507	0.0390786	0.040226	0.185862	0.0642366	0.0333753
0.844	0.0590805	0.039642	0.04007	0.183448	0.0644258	0.034095
0.845	0.0576621	0.0401669	0.0396329	0.181244	0.0643657	0.0347729
0.846	0.0561541	0.0406663	0.0388102	0.179389	0.0640366	0.0352955
0.847	0.0544932	0.0411648	0.0376656	0.178065	0.0634606	0.0356738
0.848	0.0526935	0.0415237	0.0364726	0.177382	0.0628291	0.0358652
0.849	0.0509043	0.0415838	0.0354626	0.177281	0.0623067	0.0358089
0.85	0.049293	0.0413361	0.0346764	0.177556	0.0619082	0.0355293
0.851	0.0479771	0.040919	0.0341494	0.178014	0.0616341	0.0351203
0.852	0.0470242	0.0405644	0.0339554	0.178575	0.0615221	0.0346551
0.853	0.0463402	0.0404322	0.0340821	0.179209	0.0615768	0.0341392
0.854	0.0457514	0.0404588	0.0344437	0.179895	0.0617695	0.0335871
0.855	0.0452731	0.0404776	0.0349469	0.180673	0.0620028	0.0330278
0.856	0.0450353	0.0404522	0.0355005	0.18154	0.0622066	0.0325276
0.857	0.0450247	0.0405618	0.0360915	0.182364	0.0625385	0.0322694
0.858	0.0451339	0.0410065	0.0368679	0.18298	0.0632199	0.0324274
0.859	0.045357	0.0417303	0.0379429	0.183243	0.0642097	0.0330416
0.86	0.0457814	0.042457	0.0391751	0.18307	0.0651372	0.0340505
0.861	0.04642	0.0429853	0.0402805	0.182486	0.0655778	0.0353482
0.862	0.0471255	0.0433374	0.0410443	0.181546	0.0654314	0.0368243
0.863	0.0477016	0.0435883	0.0414358	0.180287	0.0649042	0.038299
0.864	0.048085	0.0436605	0.0416127	0.178837	0.0642066	0.0394911
0.865	0.0483219	0.0434095	0.0417724	0.177317	0.0634194	0.0401582
0.866	0.0484067	0.042793	0.0420518	0.175698	0.0625385	0.0402081
0.867	0.0483404	0.0418558	0.0425157	0.173963	0.061591	0.039707
0.868	0.0482412	0.0407016	0.0430599	0.172165	0.0607257	0.0388426
0.869	0.0482046	0.0394561	0.0434022	0.17034	0.0601267	0.0378537
0.87	0.0481854	0.0381869	0.0433342	0.168571	0.059833	0.0370254
0.871	0.0481465	0.0368851	0.042898	0.166964	0.0597462	0.0366141
0.872	0.0482414	0.035477	0.0422089	0.16563	0.059788	0.0366354
0.873	0.0486609	0.0339188	0.0413045	0.164664	0.0598615	0.0368655
0.874	0.0493201	0.032321	0.0402696	0.16395	0.0598095	0.0370707
0.875	0.0499527	0.0308736	0.0393016	0.163203	0.0596514	0.0371508
0.876	0.0504724	0.0297054	0.0386224	0.162259	0.0595779	0.0371341
0.877	0.0510137	0.028919	0.0383896	0.161175	0.0596366	0.0371674
0.878	0.0516917	0.0286058	0.0385954	0.160229	0.0597337	0.0374465
0.879	0.0524966	0.0288575	0.0390609	0.159757	0.0598638	0.0380622
0.88	0.0533948	0.0298405	0.0396749	0.159814	0.0601125	0.0389991
0.881	0.0543498	0.0316805	0.0404876	0.160183	0.0604555	0.0402101
0.882	0.0552755	0.0342458	0.0414583	0.160614	0.0607079	0.0415681
0.883	0.0561048	0.0371132	0.0424216	0.160888	0.0606633	0.0428545
0.884	0.0567811	0.0398323	0.0433162	0.160901	0.0602121	0.0438958
0.885	0.0571979	0.0421647	0.044172	0.160634	0.0594908	0.04469
0.886	0.0572131	0.0440554	0.0449642	0.159998	0.0588685	0.0453393
0.887	0.0567311	0.0455241	0.0456258	0.158898	0.0586057	0.0458917
0.888	0.0558345	0.0465486	0.0461231	0.157352	0.0586472	0.046288
0.889	0.0547216	0.0470095	0.0464823	0.155486	0.0587702	0.0464309
0.89	0.0535749	0.0467089	0.0467016	0.153482	0.0588165	0.0462591
0.891	0.0525264	0.0454814	0.0466757	0.151487	0.0588072	0.0457048
0.892	0.0515725	0.0433998	0.0462567	0.149555	0.0588794	0.0447155
0.893	0.0506246	0.0407917	0.0453438	0.147686	0.0591894	0.0433853
0.894	0.0497047	0.0380182	0.0440299	0.145892	0.0598032	0.0419258
0.895	0.0489899	0.0353582	0.0426302	0.14418	0.0606122	0.0405418
0.896	0.0486223	0.0330949	0.0414596	0.142611	0.0614507	0.0393639
0.897	0.0485026	0.031511	0.0406524	0.141372	0.0621888	0.0383874
0.898	0.0484219	0.0307426	0.0401207	0.140632	0.0627499	0.037513
0.899	0.0483541	0.0307738	0.039693	0.140375	0.0631708	0.0367645
0.9	0.0484147	0.0315467	0.0393073	0.140445	0.0635095	0.0363248
0.901	0.048598	0.0329937	0.0389451	0.140683	0.0637264	0.0362745
0.902	0.0487107	0.0349545	0.0385572	0.140978	0.0637011	0.0365092
0.903	0.0485349	0.0371331	0.0381818	0.141269	0.0633435	0.0369
0.904	0.0480566	0.0392553	0.03792	0.141525	0.0627254	0.0373962
0.905	0.0474754	0.0411334	0.0377424	0.14169	0.0619824	0.0380152
0.906	0.0469285	0.0425462	0.0374529	0.141714	0.0611357	0.0387723
0.907	0.0463863	0.0433064	0.0369133	0.141539	0.0602192	0.0396026
0.908	0.0457598	0.0434178	0.0362329	0.141098	0.0594218	0.0403981
0.909	0.0449983	0.0429747	0.0356561	0.140415	0.0588984	0.0411983
0.91	0.0441917	0.0420126	0.035401	0.139543	0.0585917	0.0422046
0.911	0.0434755	0.0406131	0.0356273	0.138516	0.058265	0.0434506
0.912	0.0428929	0.0390403	0.0364238	0.13745	0.0576583	0.0446717
0.913	0.0424033	0.0376791	0.0378013	0.136465	0.0567517	0.0456208
0.914	0.0419213	0.036826	0.0396888	0.135629	0.0557842	0.0462217
0.915	0.0415001	0.0365346	0.04198	0.135106	0.0549507	0.0464818
0.916	0.0413615	0.0367018	0.0445518	0.135111	0.05426	0.0464852
0.917	0.0416332	0.037218	0.0471965	0.135679	0.0536842	0.0463337
0.918	0.042251	0.0379955	0.0496849	0.136691	0.0532542	0.0461463
0.919	0.0430242	0.0389307	0.0518469	0.137998	0.0529878	0.0460583
0.92	0.0437345	0.0398369	0.0535161	0.139413	0.0528048	0.0460674
0.921	0.0443542	0.0404942	0.0545281	0.140637	0.0525781	0.0460966
0.922	0.0450432	0.0408705	0.0547719	0.141336	0.0523211	0.0461383
0.923	0.0458763	0.0411439	0.0542607	0.141354	0.052151	0.0462153
0.924	0.0467474	0.0414352	0.0531961	0.140715	0.052111	0.0463333
0.925	0.0474418	0.0417221	0.0518366	0.139539	0.0522261	0.0464317
0.926	0.0477866	0.0419717	0.0503797	0.138086	0.0525747	0.0463898
0.927	0.0477916	0.0421622	0.0490145	0.136707	0.0532659	0.0461672
0.928	0.0475595	0.0422669	0.047883	0.135652	0.0543214	0.0458899
0.929	0.047112	0.0423106	0.0470222	0.13503	0.0555722	0.0457128
0.93	0.0463598	0.0423908	0.0464538	0.134897	0.0567806	0.0456717
0.931	0.0452254	0.0425383	0.046248	0.135221	0.0577536	0.0457205
0.932	0.0437416	0.0426052	0.0464497	0.13589	0.0583572	0.0457733
0.933	0.04207	0.0424411	0.0469974	0.136834	0.0585851	0.0457236
0.934	0.040468	0.0420675	0.0477473	0.138005	0.0586089	0.045504
0.935	0.039137	0.041669	0.0485894	0.139268	0.0586758	0.045158
0.936	0.0381454	0.0415451	0.0494996	0.140456	0.0589323	0.0447969
0.937	0.0374956	0.0419388	0.0504532	0.141375	0.0594063	0.0444827
0.938	0.0372024	0.0428787	0.0513612	0.14179	0.0600983	0.0442753
0.939	0.0373283	0.0442289	0.0521319	0.141589	0.0609814	0.0442931
0.94	0.0378655	0.0457717	0.052728	0.140884	0.0620026	0.0446197
0.941	0.0386646	0.0472813	0.0530656	0.139848	0.063084	0.0452138
0.942	0.0395441	0.0485776	0.0530053	0.138512	0.0640401	0.0459628
0.943	0.040369	0.0495523	0.0525501	0.136826	0.0646008	0.0468092
0.944	0.0411736	0.0501909	0.0518982	0.134887	0.0645595	0.0477894
0.945	0.0421969	0.0504864	0.0512596	0.132984	0.0638918	0.0488929
0.946	0.0435678	0.050397	0.0507405	0.131344	0.0627512	0.0499023
0.947	0.0451474	0.0499583	0.0504672	0.130004	0.0612764	0.0505248
0.948	0.04676	0.0493569	0.0505871	0.12894	0.059528	0.0505946
0.949	0.0482812	0.048865	0.0511045	0.1282	0.0576675	0.0500814
0.95	0.0495334	0.0487307	0.0519303	0.127785	0.0560052	0.0491151
0.951	0.0503555	0.0490856	0.0529673	0.127504	0.0548175	0.04797
0.952	0.0506969	0.0498737	0.0540781	0.127168	0.0542117	0.0469129
0.953	0.0505434	0.0508039	0.0550949	0.126735	0.0541285	0.0460726
0.954	0.0499354	0.0514443	0.0558066	0.126173	0.0543904	0.0454081
0.955	0.0490916	0.051523	0.0559705	0.125421	0.0549022	0.0448267
0.956	0.0483166	0.0509912	0.0554205	0.124483	0.0557373	0.0442959
0.957	0.0477364	0.0498954	0.0541107	0.123403	0.0569458	0.0438115
0.958	0.0473023	0.0484284	0.0521273	0.12228	0.0584575	0.043376
0.959	0.0470413	0.0468172	0.0497489	0.121289	0.0601222	0.0429945
0.96	0.0471018	0.0451104	0.0473835	0.12053	0.061775	0.0426786
0.961	0.0475995	0.043305	0.0453716	0.119915	0.0632507	0.0424955
0.962	0.0484919	0.0415763	0.0438599	0.119305	0.064381	0.0425598
0.963	0.0495943	0.0401656	0.0428094	0.118702	0.0650818	0.042942
0.964	0.0507284	0.0391208	0.0421465	0.118289	0.0653613	0.0435982
0.965	0.0518094	0.0383724	0.0418656	0.118233	0.0652298	0.0444345
0.966	0.0528225	0.0379899	0.0419665	0.118473	0.0646808	0.0453314
0.967	0.053797	0.0381543	0.0424213	0.118769	0.0637286	0.0461041
0.968	0.0547938	0.0388773	0.0430977	0.118851	0.0624458	0.0466051
0.969	0.0557418	0.0398992	0.0436621	0.118546	0.0609751	0.0467957
0.97	0.056333	0.0409259	0.043743	0.117815	0.0595145	0.0467406
0.971	0.0563528	0.041813	0.0432397	0.11674	0.0582646	0.046579
0.972	0.0559042	0.0424748	0.0423179	0.115523	0.0573439	0.0464213
0.973	0.0551965	0.0428584	0.0412286	0.114396	0.0567517	0.0463258
0.974	0.0544146	0.0430346	0.0402935	0.113483	0.0564646	0.0462694
0.975	0.0536704	0.0431091	0.0397253	0.112727	0.0565241	0.0461101
0.976	0.0529099	0.0431207	0.0394014	0.111991	0.0568896	0.0457791
0.977	0.0520134	0.0430796	0.0390799	0.111246	0.0573937	0.045396
0.978	0.0509824	0.0430291	0.0386909	0.110527	0.0579354	0.0450625
0.979	0.0499851	0.0430424	0.0383518	0.109909	0.058495	0.0447637
0.98	0.049222	0.043098	0.0381522	0.109556	0.0589618	0.0445602
0.981	0.0488115	0.0431036	0.0379594	0.109535	0.0591161	0.0446129
0.982	0.0488527	0.043098	0.0375881	0.109703	0.0588647	0.044942
0.983	0.049425	0.0431882	0.0370501	0.109871	0.0583294	0.0453953
0.984	0.0505263	0.0434459	0.0365452	0.109969	0.0576773	0.0457537
0.985	0.052118	0.0439839	0.0363201	0.110055	0.0570172	0.0457576
0.986	0.0541242	0.04486	0.0365176	0.110215	0.0564084	0.0453053
0.987	0.0563322	0.0460392	0.0371523	0.1104	0.0559564	0.0445476
0.988	0.0584544	0.0475121	0.0382616	0.110425	0.0557839	0.0436163
0.989	0.0603333	0.0491556	0.0399421	0.110223	0.0558489	0.0426114
0.99	0.0618966	0.0506549	0.0422175	0.109902	0.0560438	0.0417821
0.991	0.0629938	0.0517311	0.0449714	0.109548	0.0563926	0.0412971
0.992	0.0635196	0.0522717	0.0479507	0.109163	0.0569052	0.0411111
0.993	0.0635714	0.0523096	0.0509028	0.108627	0.0574273	0.0411458
0.994	0.0633043	0.0519736	0.0537097	0.107768	0.0577563	0.0412846
0.995	0.062813	0.0514236	0.0562816	0.106581	0.0577328	0.0413779
0.996	0.0622081	0.0507973	0.0584505	0.105179	0.0572645	0.0413873
0.997	0.0615666	0.0501079	0.0600608	0.103599	0.0564102	0.0413585
0.998	0.0609309	0.0492652	0.0610568	0.1019	0.055354	0.0412924
0.999	0.0604113	0.0482279	0.061435	0.100281	0.0542828	0.0411146
1	0.0600482	0.0470209	0.0612426	0.0989682	0.0533706	0.0407273
1.001	0.059721	0.0457192	0.0606633	0.0980976	0.0527284	0.0401044
1.002	0.0593759	0.0443909	0.0599344	0.0976496	0.0522976	0.0393265
1.003	0.0591755	0.0429997	0.0591528	0.0974604	0.0519215	0.0384383
1.004	0.0592727	0.0415815	0.0583214	0.0974086	0.0514405	0.0373809
1.005	0.0595698	0.0403769	0.0574862	0.0975156	0.0507877	0.0360854
1.006	0.0598592	0.0395312	0.0567174	0.0978319	0.0500911	0.0345035
1.007	0.0600802	0.0389122	0.0561055	0.0983116	0.0494707	0.0326551
1.008	0.0603005	0.0383557	0.0557176	0.098842	0.0488761	0.0306851
1.009	0.0605217	0.0378675	0.0555423	0.0994288	0.0482391	0.0287805
1.01	0.0606469	0.037523	0.0556191	0.100168	0.0474961	0.0270763
1.011	0.0605536	0.0373582	0.0560108	0.101004	0.0465743	0.025653
1.012	0.0601711	0.0373867	0.0565812	0.101677	0.0455029	0.0245081
1.013	0.0596094	0.0376	0.0569471	0.101891	0.0443349	0.0235812
1.014	0.059027	0.038023	0.0566988	0.101545	0.043087	0.0229725
1.015	0.0584322	0.0387414	0.0557397	0.100808	0.0418778	0.0229393
1.016	0.0577969	0.0398405	0.0542771	0.09997	0.0409151	0.0235933
1.017	0.0571374	0.0413331	0.0525486	0.0992475	0.0403948	0.0248566
1.018	0.0564772	0.0431236	0.050779	0.0986535	0.0405135	0.0266207
1.019	0.0558073	0.0450832	0.0492008	0.0980918	0.0414348	0.028712
1.02	0.0550512	0.047016	0.0479853	0.0975234	0.0431717	0.0309418
1.021	0.0541714	0.0486179	0.0472142	0.0969455	0.0455289	0.03335
1.022	0.0531519	0.0496864	0.0468668	0.0963859	0.048198	0.0360697
1.023	0.0519823	0.0502239	0.0467832	0.0959513	0.0509073	0.0389524
1.024	0.0509591	0.0503053	0.0467303	0.095758	0.0534623	0.0416123
1.025	0.0505949	0.0499822	0.0465812	0.0957956	0.055784	0.0436906
1.026	0.051119	0.0492517	0.0463955	0.0959306	0.0579334	0.0450158
1.027	0.0523811	0.0480992	0.0462548	0.0961162	0.0599754	0.0456669
1.028	0.0541357	0.0466596	0.0460927	0.0964938	0.061886	0.0458097
1.029	0.0562668	0.0452615	0.045873	0.0972109	0.0634928	0.0456051
1.03	0.058801	0.0441986	0.0457852	0.0982246	0.0644972	0.0452382
1.031	0.0618459	0.04357	0.0460728	0.0994264	0.064828	0.044742
1.032	0.0655263	0.0434433	0.0468454	0.100805	0.0647704	0.0439118
1.033	0.0699037	0.0439893	0.0481627	0.102336	0.064681	0.0425073
1.034	0.0749555	0.0453099	0.0501629	0.104001	0.0648595	0.04047
1.035	0.0805357	0.047339	0.0529476	0.105871	0.0655321	0.0379678
1.036	0.0863364	0.0499434	0.0563336	0.10802	0.0667628	0.0353584
1.037	0.0921108	0.052988	0.0599019	0.110506	0.068445	0.033099
1.038	0.0978741	0.056378	0.0633847	0.113365	0.0704073	0.0315526
1.039	0.103691	0.0599896	0.0667623	0.116577	0.0724348	0.0309186
1.04	0.109441	0.0634661	0.0699233	0.120034	0.07425	0.0313165
1.041	0.114865	0.0660088	0.0725243	0.123519	0.0756255	0.0327835
1.042	0.119652	0.0637521	0.0742057	0.126804	0.0763902	0.0352499
1.043	0.123494	0.0497153	0.0748391	0.129703	0.0763661	0.038542
1.044	0.126181	0.0232864	0.074538	0.13197	0.0754475	0.0423134
1.045	0.12772	-0.00626667	0.0734884	0.133323	0.0736606	0.0460357
1.046	0.12836	-0.0290737	0.0719146	0.133619	0.0711486	0.0491672
1.047	0.128453	-0.0402156	0.07008	0.132936	0.0680992	0.0514007
1.048	0.128185	-0.0386883	0.0681911	0.131449	0.0647222	0.0527493
1.049	0.127555	-0.0259479	0.0663908	0.129403	0.0612554	0.0533595
1.05	0.126618	-0.00482349	0.0648032	0.127158	0.0578698	0.0533504
1.051	0.125458	0.0211757	0.0635394	0.125021	0.0546612	0.0528137
1.052	0.12409	0.0484465	0.0627328	0.123246	0.0517053	0.0511654
1.053	0.122526	0.0739872	0.0625369	0.122072	0.049084	0.0439483
1.054	0.120737	0.0957495	0.0630001	0.12154	0.0469049	0.0235317
1.055	0.11849	0.112497	0.0639746	0.121462	0.0452492	-0.0107289
1.056	0.115006	0.123641	0.0651757	0.118347	0.0441943	-0.0489727
1.057	0.108919	0.129204	0.0663346	0.103944	0.0438137	-0.079977
1.058	0.098057	0.129769	0.067276	0.0750226	0.04402	-0.0972669
1.059	0.0799842	0.126381	0.0678661	0.0390909	0.0444059	-0.0989042
1.06	0.0554808	0.120349	0.0679934	0.00614318	0.041742	-0.0861988
1.061	0.0295948	0.112929	0.0675807	-0.0174621	0.0293479	-0.0622975
1.062	0.00778861	0.105204	0.0664661	-0.0288656	0.00527914	-0.030993
1.063	-0.00648861	0.0982459	0.0642519	-0.0280109	-0.0234706	0.0038104
1.064	-0.0118197	0.0929546	0.05884	-0.0167138	-0.0480429	0.0384207
1.065	-0.0085402	0.0896747	0.0465581	0.00233448	-0.0629497	0.0699273
1.066	0.00184594	0.0882094	0.0278629	0.0261715	-0.0660509	0.0963881
1.067	0.0172697	0.0881439	0.00904734	0.0519636	-0.0576832	0.1167
1.068	0.035442	0.088941	-0.00379507	0.0773194	-0.0397174	0.130604
1.069	0.0541244	0.0900472	-0.008151	0.10046	-0.0149111	0.138533
1.07	0.0715462	0.0911044	-0.0043021	0.120274	0.0135572	0.141304
1.071	0.0866014	0.091882	0.0059266	0.136144	0.0426541	0.139983
1.072	0.0987419	0.0922326	0.0201678	0.147771	0.06987	0.135844
1.073	0.107879	0.092275	0.036051	0.155266	0.0933182	0.130195
1.074	0.114212	0.0923898	0.0516771	0.159164	0.111819	0.124151
1.075	0.117965	0.0928779	0.0658375	0.160135	0.124924	0.11851
1.076	0.119275	0.0937195	0.077784	0.158853	0.132809	0.113718
1.077	0.11832	0.0946857	0.0870034	0.15602	0.136043	0.109713
1.078	0.115442	0.0955379	0.0932657	0.152249	0.135386	0.105942
1.079	0.111088	0.0961225	0.0967648	0.148122	0.131769	0.101878
1.08	0.105739	0.096314	0.098028	0.144288	0.126265	0.0974014
1.081	0.0999139	0.0959685	0.0976302	0.141366	0.119964	0.0926268
1.082	0.0941834	0.0950161	0.0961214	0.13969	0.11374	0.0877148
1.083	0.0890563	0.0935124	0.0940455	0.138987	0.108141	0.0829901
1.084	0.0847782	0.091644	0.0916688	0.138536	0.103507	0.078876
1.085	0.0814017	0.0897247	0.0888483	0.137718	0.100073	0.0756218
1.086	0.0789188	0.0880651	0.0853452	0.136303	0.098047	0.0732902
1.087	0.0771888	0.0868117	0.0811871	0.134385	0.0975642	0.0718664
1.088	0.0759828	0.0859614	0.0767064	0.132134	0.098412	0.0712643
1.089	0.0751588	0.0855075	0.0722643	0.12964	0.0999276	0.0713744
1.09	0.0746272	0.0854626	0.0680546	0.127047	0.101327	0.0720954
1.091	0.0742098	0.0857867	0.0641508	0.124559	0.102053	0.0731893
1.092	0.0735883	0.0864049	0.0606636	0.122219	0.101856	0.0742952
1.093	0.0722623	0.0871569	0.0578424	0.119838	0.100737	0.0751863
1.094	0.0695486	0.0876157	0.0559546	0.116866	0.0988446	0.0758906
1.095	0.0647391	0.0870695	0.0551379	0.112027	0.0964278	0.0766348
1.096	0.0572973	0.0847266	0.0554544	0.103503	0.0939857	0.077639
1.097	0.0469482	0.0799084	0.0568696	0.0898376	0.0922316	0.0789211
1.098	0.0337158	0.0721197	0.059125	0.0705555	0.0917368	0.0801762
1.099	0.0177175	0.0610575	0.0617847	0.0459733	0.0925876	0.0805002
1.1	-0.00118191	0.0465901	0.0642457	0.0166984	0.0941713	0.0784152
1.101	-0.0232626	0.0286112	0.0656365	-0.0167166	0.0951844	0.0725256
1.102	-0.0485933	0.00690582	0.0649332	-0.0537304	0.0940268	0.062022
1.103	-0.0769419	-0.01875	0.0612768	-0.0935423	0.0893101	0.0465861
1.104	-0.107948	-0.048367	0.0542131	-0.135205	0.0801498	0.0261297
1.105	-0.141328	-0.0816644	0.0436657	-0.177908	0.0662073	0.000619744
1.106	-0.176787	-0.118262	0.0296065	-0.22082	0.0475209	-0.0299958
1.107	-0.213837	-0.157802	0.0118156	-0.262908	0.0242975	-0.0656166
1.108	-0.251957	-0.199858	-0.0100123	-0.303141	-0.00321084	-0.105697
1.109	-0.290716	-0.243934	-0.0360751	-0.34079	-0.0347215	-0.149228
1.11	-0.32961	-0.289488	-0.0663219	-0.37559	-0.0699329	-0.195018
1.111	-0.368041	-0.335997	-0.100439	-0.407595	-0.108466	-0.241953
1.112	-0.405469	-0.383045	-0.13795	-0.436947	-0.149597	-0.289114
1.113	-0.441514	-0.430172	-0.178284	-0.463873	-0.192229	-0.335829
1.114	-0.47605	-0.476766	-0.220854	-0.488745	-0.235247	-0.381619
1.115	-0.509121	-0.522323	-0.265108	-0.51209	-0.277814	-0.426103
1.116	-0.540787	-0.5667	-0.310541	-0.53452	-0.319411	-0.469073
1.117	-0.571151	-0.609936	-0.356838	-0.556561	-0.359668	-0.510517
1.118	-0.60036	-0.652057	-0.40389	-0.578621	-0.398216	-0.550495
1.119	-0.628499	-0.693118	-0.451528	-0.601001	-0.434848	-0.589189
1.12	-0.655626	-0.732914	-0.499347	-0.62388	-0.469651	-0.627018
1.121	-0.681868	-0.770667	-0.546812	-0.64739	-0.502891	-0.664479
1.122	-0.707511	-0.805885	-0.593467	-0.671687	-0.534976	-0.701914
1.123	-0.732908	-0.83924	-0.638911	-0.696845	-0.566484	-0.739532
1.124	-0.758184	-0.8719	-0.68271	-0.722797	-0.59794	-0.777601
1.125	-0.783287	-0.90466	-0.724591	-0.749475	-0.629687	-0.816471
1.126	-0.808232	-0.937964	-0.764683	-0.776875	-0.661996	-0.856468
1.127	-0.833004	-0.972116	-0.803363	-0.804961	-0.695122	-0.897783
1.128	-0.857559	-1.00715	-0.840908	-0.833604	-0.729265	-0.940396
1.129	-0.881983	-1.04275	-0.877507	-0.862601	-0.764521	-0.984147
1.13	-0.906347	-1.07841	-0.913465	-0.891787	-0.800882	-1.02877
1.131	-0.930502	-1.11379	-0.949056	-0.921025	-0.838275	-1.07394
1.132	-0.954231	-1.1487	-0.984332	-0.950118	-0.87656	-1.11935
1.133	-0.977521	-1.18285	-1.01915	-0.978835	-0.915506	-1.16472
1.134	-1.00049	-1.21593	-1.05331	-1.00691	-0.954783	-1.20955
1.135	-1.02315	-1.24767	-1.08674	-1.03415	-0.994022	-1.25328
1.136	-1.0454	-1.27793	-1.1195	-1.06045	-1.03284	-1.29537
1.137	-1.06723	-1.30657	-1.15163	-1.08584	-1.07078	-1.33544
1.138	-1.08875	-1.33342	-1.18297	-1.11036	-1.10747	-1.37343
1.139	-1.11	-1.35848	-1.21302	-1.1341	-1.14282	-1.40948
1.14	-1.1309	-1.38205	-1.24134	-1.1572	-1.1769	-1.44369
1.141	-1.1513	-1.40446	-1.26805	-1.17993	-1.20981	-1.47615
1.142	-1.17112	-1.42578	-1.29383	-1.2025	-1.24159	-1.50692
1.143	-1.19023	-1.44585	-1.31943	-1.2249	-1.27216	-1.53597
1.144	-1.20837	-1.46442	-1.34522	-1.24698	-1.30146	-1.56327
1.145	-1.22525	-1.48128	-1.37117	-1.26855	-1.3296	-1.58892
1.146	-1.24065	-1.49626	-1.39707	-1.28949	-1.35661	-1.61291
1.147	-1.25447	-1.50933	-1.42258	-1.30966	-1.38242	-1.63517
1.148	-1.26667	-1.52056	-1.44718	-1.32891	-1.40695	-1.65568
1.149	-1.27742	-1.53011	-1.4705	-1.34709	-1.4301	-1.67464
1.15	-1.28692	-1.53823	-1.49229	-1.36404	-1.45174	-1.69242
1.151	-1.29523	-1.54522	-1.5123	-1.37969	-1.4718	-1.70936
1.152	-1.30229	-1.5514	-1.53019	-1.39427	-1.49019	-1.72549
1.153	-1.30822	-1.5572	-1.5457	-1.40816	-1.50684	-1.74067
1.154	-1.31335	-1.56319	-1.5587	-1.42165	-1.52183	-1.75471
1.155	-1.3181	-1.56955	-1.56925	-1.43469	-1.53532	-1.76747
1.156	-1.32287	-1.5757	-1.57764	-1.4468	-1.54736	-1.77882
1.157	-1.32793	-1.58088	-1.58433	-1.45749	-1.55796	-1.7887
1.158	-1.33317	-1.5845	-1.58965	-1.46661	-1.56713	-1.79745
1.159	-1.33823	-1.58623	-1.59383	-1.47441	-1.57506	-1.8055
1.16	-1.34275	-1.58594	-1.59695	-1.48131	-1.58206	-1.81302
1.161	-1.34657	-1.58377	-1.59884	-1.48747	-1.58836	-1.81989
1.162	-1.34963	-1.58005	-1.59941	-1.49284	-1.5941	-1.8259
1.163	-1.35177	-1.57519	-1.5991	-1.49738	-1.59932	-1.831
1.164	-1.35275	-1.56947	-1.59858	-1.50102	-1.60398	-1.83527
1.165	-1.35246	-1.56317	-1.5984	-1.50365	-1.60811	-1.83869
1.166	-1.35103	-1.55663	-1.59886	-1.50527	-1.61178	-1.84106
1.167	-1.34858	-1.55015	-1.59996	-1.50599	-1.61488	-1.8398
1.168	-1.34514	-1.54387	-1.60144	-1.50595	-1.61711	-1.82877
1.169	-1.34068	-1.53782	-1.6029	-1.5051	-1.61822	-1.80523
1.17	-1.33537	-1.53191	-1.6039	-1.50329	-1.61808	-1.77473
1.171	-1.32956	-1.52601	-1.60412	-1.50048	-1.61674	-1.74548
1.172	-1.32355	-1.52011	-1.60338	-1.49664	-1.61416	-1.72301
1.173	-1.31766	-1.51433	-1.6016	-1.49158	-1.61023	-1.70968
1.174	-1.31202	-1.50869	-1.59862	-1.48435	-1.60487	-1.70546
1.175	-1.30638	-1.50313	-1.59436	-1.47304	-1.5981	-1.70878
1.176	-1.30028	-1.49748	-1.58898	-1.45715	-1.59005	-1.71714
1.177	-1.29361	-1.49164	-1.58268	-1.43894	-1.58011	-1.72787
1.178	-1.2867	-1.48562	-1.57551	-1.42122	-1.56634	-1.73868
1.179	-1.28	-1.47942	-1.56746	-1.406	-1.54762	-1.74786
1.18	-1.27399	-1.473	-1.55849	-1.39449	-1.52588	-1.75419
1.181	-1.269	-1.46631	-1.54848	-1.38725	-1.5045	-1.75696
1.182	-1.265	-1.45932	-1.53731	-1.38399	-1.4861	-1.75599
1.183	-1.26171	-1.45214	-1.52544	-1.38374	-1.47195	-1.75148
1.184	-1.2588	-1.44487	-1.51375	-1.38539	-1.46226	-1.74384
1.185	-1.25601	-1.43749	-1.50288	-1.38797	-1.45651	-1.73362
1.186	-1.25303	-1.42981	-1.49303	-1.39057	-1.45378	-1.72142
1.187	-1.24957	-1.42168	-1.4842	-1.39229	-1.45296	-1.7078
1.188	-1.24538	-1.41304	-1.47622	-1.39238	-1.45299	-1.69327
1.189	-1.24043	-1.40394	-1.46883	-1.39059	-1.45295	-1.67832
1.19	-1.23497	-1.3946	-1.46158	-1.38718	-1.45214	-1.66335
1.191	-1.22921	-1.3853	-1.45388	-1.38254	-1.45003	-1.64853
1.192	-1.22347	-1.3762	-1.44541	-1.37689	-1.4464	-1.63419
1.193	-1.21808	-1.3674	-1.43637	-1.37037	-1.44132	-1.62079
1.194	-1.21321	-1.35901	-1.42724	-1.36322	-1.43489	-1.60859
1.195	-1.20873	-1.3511	-1.41838	-1.35576	-1.42716	-1.59759
1.196	-1.20432	-1.34367	-1.41009	-1.34826	-1.41832	-1.58764
1.197	-1.19973	-1.33671	-1.40254	-1.3409	-1.40878	-1.5786
1.198	-1.19486	-1.33015	-1.39578	-1.33377	-1.39904	-1.57026
1.199	-1.18969	-1.32384	-1.38964	-1.32683	-1.38942	-1.56227
1.2	-1.18426	-1.31761	-1.38407	-1.32	-1.38012	-1.55421
1.201	-1.17848	-1.31144	-1.37891	-1.3133	-1.37115	-1.54585
1.202	-1.17237	-1.30536	-1.37389	-1.30681	-1.36252	-1.53724
1.203	-1.16595	-1.29928	-1.36878	-1.3004	-1.3541	-1.52839
1.204	-1.15911	-1.29311	-1.36349	-1.29396	-1.34571	-1.51911
1.205	-1.15164	-1.28674	-1.35788	-1.28705	-1.33723	-1.50925
1.206	-1.14347	-1.28014	-1.35183	-1.27877	-1.32861	-1.49882
1.207	-1.13476	-1.27336	-1.34531	-1.26864	-1.31977	-1.48806
1.208	-1.12597	-1.26652	-1.33841	-1.25725	-1.31028	-1.47721
1.209	-1.11771	-1.25976	-1.33124	-1.24565	-1.2991	-1.46642
1.21	-1.11035	-1.25322	-1.32368	-1.23461	-1.28562	-1.45556
1.211	-1.10387	-1.24692	-1.31557	-1.22459	-1.27067	-1.4443
1.212	-1.09799	-1.24072	-1.30707	-1.21574	-1.25573	-1.43236
1.213	-1.09244	-1.23453	-1.29851	-1.20795	-1.24199	-1.41986
1.214	-1.08711	-1.22846	-1.29019	-1.20088	-1.23022	-1.40726
1.215	-1.08214	-1.22259	-1.28229	-1.1941	-1.22071	-1.39512
1.216	-1.0777	-1.21687	-1.2747	-1.18749	-1.21336	-1.38383
1.217	-1.07375	-1.21107	-1.2672	-1.18111	-1.20786	-1.37361
1.218	-1.07025	-1.20501	-1.25976	-1.17499	-1.20371	-1.36453
1.219	-1.06716	-1.19854	-1.25253	-1.16916	-1.20011	-1.35654
1.22	-1.06435	-1.19154	-1.24565	-1.16361	-1.19618	-1.34936
1.221	-1.06161	-1.18405	-1.23913	-1.15831	-1.19124	-1.34246
1.222	-1.05877	-1.17624	-1.23289	-1.15326	-1.18504	-1.33539
1.223	-1.05573	-1.16839	-1.22676	-1.14841	-1.17784	-1.32795
1.224	-1.05239	-1.16071	-1.22057	-1.14355	-1.1702	-1.3202
1.225	-1.04869	-1.15333	-1.2143	-1.13846	-1.16261	-1.31231
1.226	-1.04467	-1.1463	-1.20807	-1.13302	-1.15527	-1.30438
1.227	-1.04039	-1.13963	-1.20205	-1.12707	-1.14816	-1.29647
1.228	-1.03572	-1.13338	-1.19624	-1.12054	-1.14113	-1.28866
1.229	-1.03056	-1.12755	-1.19054	-1.11354	-1.13401	-1.28106
1.23	-1.02497	-1.12205	-1.18475	-1.10633	-1.12665	-1.27366
1.231	-1.01909	-1.11678	-1.17863	-1.09921	-1.11892	-1.2662
1.232	-1.01299	-1.11159	-1.17214	-1.09247	-1.11082	-1.2585
1.233	-1.00674	-1.10625	-1.16551	-1.08614	-1.10258	-1.25062
1.234	-1.00045	-1.10058	-1.15894	-1.08004	-1.09448	-1.24268
1.235	-0.994212	-1.09452	-1.15243	-1.07386	-1.08673	-1.23464
1.236	-0.988014	-1.08815	-1.14589	-1.06734	-1.07946	-1.22649
1.237	-0.981754	-1.08165	-1.1393	-1.06043	-1.07268	-1.21832
1.238	-0.975296	-1.07519	-1.13266	-1.05324	-1.06625	-1.21015
1.239	-0.96856	-1.06888	-1.12599	-1.0459	-1.05992	-1.20197
1.24	-0.961587	-1.06283	-1.11933	-1.03848	-1.05353	-1.1938
1.241	-0.95451	-1.05712	-1.11272	-1.03105	-1.04704	-1.18565
1.242	-0.947446	-1.05164	-1.10615	-1.02373	-1.04042	-1.17758
1.243	-0.940514	-1.04622	-1.09964	-1.01658	-1.03364	-1.16961
1.244	-0.933949	-1.04077	-1.09315	-1.00966	-1.02673	-1.16174
1.245	-0.928017	-1.03526	-1.08654	-1.00304	-1.01975	-1.15398
1.246	-0.92292	-1.02974	-1.07971	-0.996751	-1.01271	-1.14641
1.247	-0.918724	-1.02429	-1.07277	-0.990808	-1.00573	-1.13909
1.248	-0.915238	-1.01906	-1.06591	-0.985153	-0.998981	-1.13198
1.249	-0.91212	-1.01409	-1.05925	-0.979662	-0.992565	-1.12495
1.25	-0.90913	-1.00935	-1.05295	-0.974234	-0.986465	-1.11782
1.251	-0.906158	-1.0047	-1.04715	-0.968837	-0.980637	-1.11049
1.252	-0.903099	-0.999877	-1.04185	-0.963479	-0.97503	-1.10307
1.253	-0.89986	-0.99467	-1.03704	-0.958184	-0.969628	-1.0955
1.254	-0.896389	-0.989132	-1.03266	-0.953037	-0.964385	-1.08761
1.255	-0.892747	-0.983463	-1.0285	-0.94818	-0.959161	-1.07931
1.256	-0.889078	-0.977853	-1.02425	-0.943714	-0.95378	-1.07059
1.257	-0.885514	-0.972441	-1.01965	-0.93964	-0.9481	-1.06159
1.258	-0.882168	-0.967275	-1.01469	-0.935845	-0.942121	-1.05267
1.259	-0.879133	-0.96239	-1.00954	-0.932212	-0.935915	-1.04432
1.26	-0.87644	-0.957837	-1.00433	-0.928853	-0.929649	-1.03692
1.261	-0.874165	-0.9536	-0.999052	-0.92603	-0.923654	-1.03063
1.262	-0.872423	-0.949569	-0.9938	-0.923805	-0.918182	-1.02541
1.263	-0.871073	-0.945555	-0.988653	-0.921962	-0.913301	-1.02104
1.264	-0.869667	-0.941362	-0.983541	-0.920132	-0.909015	-1.01721
1.265	-0.86785	-0.936855	-0.978383	-0.917924	-0.905199	-1.01363
1.266	-0.865467	-0.931889	-0.973209	-0.915084	-0.901598	-1.01
1.267	-0.862328	-0.926394	-0.967984	-0.911566	-0.898022	-1.00599
1.268	-0.858287	-0.920532	-0.9626	-0.907484	-0.894258	-1.00146
1.269	-0.853503	-0.914576	-0.957074	-0.903029	-0.889891	-0.996403
1.27	-0.848353	-0.9087	-0.951468	-0.898328	-0.884598	-0.990869
1.271	-0.843099	-0.902993	-0.945697	-0.893386	-0.87847	-0.984956
1.272	-0.837861	-0.897582	-0.939686	-0.888159	-0.871876	-0.978781
1.273	-0.832801	-0.892613	-0.933528	-0.88263	-0.865244	-0.972397
1.274	-0.828083	-0.888127	-0.927286	-0.876978	-0.858918	-0.965793
1.275	-0.823758	-0.88407	-0.920937	-0.871546	-0.853059	-0.959051
1.276	-0.819761	-0.880346	-0.914498	-0.866472	-0.847649	-0.952341
1.277	-0.815955	-0.876821	-0.908026	-0.861604	-0.842563	-0.945695
1.278	-0.812253	-0.873399	-0.901638	-0.856753	-0.837686	-0.938972
1.279	-0.808622	-0.86996	-0.895567	-0.851841	-0.832933	-0.932067
1.28	-0.80499	-0.866277	-0.890024	-0.846879	-0.828206	-0.925103
1.281	-0.801257	-0.862326	-0.885064	-0.841882	-0.823433	-0.918392
1.282	-0.797399	-0.85838	-0.880531	-0.836896	-0.81861	-0.912212
1.283	-0.793534	-0.854673	-0.876172	-0.832042	-0.813789	-0.906675
1.284	-0.789777	-0.851196	-0.871779	-0.82749	-0.809055	-0.901667
1.285	-0.786013	-0.847764	-0.867257	-0.82337	-0.804447	-0.896949
1.286	-0.781966	-0.844129	-0.86264	-0.819653	-0.799746	-0.892381
1.287	-0.777445	-0.840083	-0.858027	-0.816242	-0.794534	-0.887926
1.288	-0.77248	-0.835564	-0.853479	-0.813125	-0.788653	-0.883541
1.289	-0.767275	-0.83066	-0.849101	-0.810241	-0.782352	-0.879189
1.29	-0.762083	-0.825543	-0.845044	-0.807368	-0.775999	-0.874816
1.291	-0.75713	-0.820438	-0.841335	-0.804196	-0.769866	-0.870286
1.292	-0.752615	-0.815487	-0.837832	-0.800478	-0.764123	-0.865495
1.293	-0.748687	-0.810617	-0.834412	-0.796192	-0.758819	-0.860492
1.294	-0.745288	-0.805663	-0.831095	-0.79151	-0.753904	-0.855298
1.295	-0.742108	-0.800585	-0.827871	-0.786604	-0.749283	-0.849817
1.296	-0.738888	-0.795385	-0.824606	-0.781603	-0.744749	-0.844114
1.297	-0.735646	-0.789977	-0.821298	-0.776638	-0.740131	-0.838532
1.298	-0.732499	-0.78432	-0.818046	-0.771845	-0.735509	-0.83335
1.299	-0.729498	-0.778569	-0.814807	-0.767301	-0.73109	-0.828658
1.3	-0.726642	-0.773036	-0.811503	-0.762977	-0.727044	-0.824462
1.301	-0.723892	-0.768016	-0.808175	-0.758791	-0.723481	-0.820673
1.302	-0.721203	-0.763715	-0.804916	-0.754678	-0.720347	-0.817173
1.303	-0.718584	-0.760216	-0.801762	-0.750595	-0.717427	-0.81385
1.304	-0.716066	-0.757399	-0.798606	-0.74647	-0.714522	-0.810513
1.305	-0.713669	-0.755076	-0.795295	-0.742213	-0.711478	-0.806995
1.306	-0.71137	-0.753157	-0.791779	-0.737893	-0.70818	-0.803295
1.307	-0.709047	-0.751544	-0.788087	-0.733683	-0.704607	-0.799445
1.308	-0.706595	-0.750053	-0.784272	-0.72964	-0.700858	-0.795446
1.309	-0.704046	-0.748549	-0.780385	-0.725733	-0.697106	-0.791375
1.31	-0.701522	-0.747001	-0.776466	-0.721936	-0.693421	-0.787299
1.311	-0.699165	-0.745302	-0.772554	-0.71818	-0.689763	-0.783205
1.312	-0.697022	-0.743372	-0.76866	-0.714372	-0.686177	-0.77912
1.313	-0.694993	-0.741448	-0.764702	-0.710444	-0.682746	-0.77505
1.314	-0.692928	-0.739673	-0.760531	-0.706416	-0.679452	-0.770864
1.315	-0.690669	-0.737692	-0.756019	-0.702415	-0.676204	-0.76649
1.316	-0.688136	-0.735043	-0.751204	-0.6986	-0.672959	-0.761997
1.317	-0.68535	-0.731548	-0.746245	-0.695124	-0.669717	-0.757432
1.318	-0.682407	-0.727354	-0.741219	-0.692053	-0.66645	-0.752844
1.319	-0.679492	-0.722794	-0.736147	-0.689324	-0.66313	-0.748358
1.32	-0.676745	-0.71817	-0.731143	-0.686869	-0.659771	-0.744094
1.321	-0.674163	-0.71366	-0.726432	-0.684686	-0.656429	-0.740033
1.322	-0.671694	-0.709295	-0.722188	-0.68277	-0.653144	-0.736043
1.323	-0.669263	-0.70498	-0.718398	-0.680991	-0.649898	-0.732031
1.324	-0.666782	-0.70064	-0.714976	-0.679108	-0.646741	-0.727997
1.325	-0.664239	-0.696342	-0.711901	-0.67695	-0.643837	-0.724006
1.326	-0.661758	-0.692247	-0.709088	-0.674493	-0.6413	-0.720076
1.327	-0.659557	-0.688565	-0.706324	-0.67177	-0.639079	-0.716121
1.328	-0.657754	-0.685458	-0.70343	-0.668743	-0.637021	-0.712059
1.329	-0.65619	-0.682934	-0.700328	-0.6653	-0.634961	-0.707916
1.33	-0.654608	-0.680896	-0.697009	-0.661471	-0.632719	-0.703829
1.331	-0.652938	-0.679263	-0.693449	-0.657597	-0.630175	-0.699948
1.332	-0.651272	-0.677915	-0.689627	-0.654152	-0.627372	-0.696401
1.333	-0.649645	-0.676605	-0.685661	-0.651426	-0.624372	-0.693267
1.334	-0.647965	-0.675161	-0.681802	-0.649407	-0.621125	-0.690406
1.335	-0.646191	-0.673603	-0.678265	-0.64794	-0.617677	-0.6876
1.336	-0.644392	-0.671915	-0.675116	-0.646821	-0.614284	-0.684849
1.337	-0.642537	-0.67004	-0.672378	-0.645776	-0.611185	-0.682323
1.338	-0.640492	-0.668069	-0.670094	-0.644567	-0.608426	-0.680137
1.339	-0.638237	-0.666156	-0.668197	-0.643122	-0.605964	-0.678311
1.34	-0.635842	-0.664387	-0.66658	-0.641469	-0.603801	-0.676806
1.341	-0.633279	-0.662696	-0.665261	-0.639601	-0.601958	-0.675479
1.342	-0.630394	-0.660856	-0.664179	-0.637386	-0.600363	-0.67419
1.343	-0.62708	-0.658627	-0.663042	-0.634635	-0.5989	-0.672926
1.344	-0.623443	-0.655911	-0.661579	-0.631322	-0.597451	-0.67164
1.345	-0.61977	-0.652787	-0.659739	-0.627655	-0.595865	-0.670196
1.346	-0.616351	-0.649477	-0.657611	-0.623873	-0.594074	-0.668512
1.347	-0.613298	-0.646273	-0.655279	-0.620126	-0.592103	-0.666677
1.348	-0.610558	-0.643353	-0.652712	-0.616537	-0.589935	-0.664985
1.349	-0.608088	-0.640685	-0.649822	-0.613243	-0.587624	-0.663656
1.35	-0.605881	-0.638093	-0.646599	-0.610363	-0.585326	-0.662506
1.351	-0.603907	-0.635425	-0.643116	-0.607895	-0.583062	-0.66111
1.352	-0.602154	-0.63267	-0.639475	-0.605676	-0.580651	-0.659237
1.353	-0.600592	-0.629815	-0.635964	-0.603468	-0.577865	-0.65698
1.354	-0.59909	-0.626822	-0.633059	-0.601124	-0.574617	-0.654444
1.355	-0.597533	-0.623771	-0.631064	-0.598546	-0.570983	-0.651611
1.356	-0.595934	-0.620838	-0.629906	-0.595595	-0.567082	-0.648523
1.357	-0.59435	-0.618169	-0.629288	-0.592233	-0.563025	-0.645237
1.358	-0.592754	-0.61576	-0.628928	-0.588667	-0.558898	-0.641746
1.359	-0.591081	-0.61352	-0.628656	-0.585255	-0.554685	-0.638041
1.36	-0.589357	-0.611417	-0.62835	-0.582278	-0.550289	-0.634098
1.361	-0.58769	-0.6095	-0.627872	-0.579751	-0.545746	-0.629922
1.362	-0.586049	-0.607813	-0.627072	-0.577539	-0.541331	-0.625588
1.363	-0.584186	-0.606265	-0.625862	-0.575569	-0.537372	-0.621187
1.364	-0.581994	-0.604619	-0.624279	-0.573832	-0.534068	-0.616879
1.365	-0.579584	-0.602668	-0.622485	-0.57232	-0.531415	-0.612895
1.366	-0.577058	-0.600375	-0.620702	-0.571034	-0.529258	-0.609353
1.367	-0.574554	-0.597829	-0.619062	-0.570039	-0.527474	-0.606221
1.368	-0.572326	-0.595103	-0.617533	-0.56943	-0.526083	-0.603524
1.369	-0.570581	-0.592257	-0.615978	-0.569187	-0.525207	-0.601403
1.37	-0.569225	-0.589405	-0.614249	-0.569122	-0.524864	-0.599888
1.371	-0.567924	-0.58662	-0.612316	-0.569027	-0.524854	-0.59871
1.372	-0.566468	-0.58387	-0.610265	-0.568745	-0.524901	-0.597513
1.373	-0.564816	-0.581148	-0.608201	-0.568128	-0.524809	-0.596042
1.374	-0.563001	-0.578528	-0.60623	-0.567116	-0.524572	-0.594093
1.375	-0.561217	-0.576051	-0.604405	-0.565773	-0.524303	-0.591587
1.376	-0.5597	-0.573704	-0.602658	-0.564156	-0.524023	-0.588621
1.377	-0.558505	-0.571461	-0.600843	-0.562223	-0.523639	-0.585348
1.378	-0.557527	-0.569239	-0.598866	-0.559957	-0.523029	-0.581909
1.379	-0.556673	-0.566852	-0.596762	-0.557437	-0.522128	-0.578487
1.38	-0.555914	-0.564191	-0.594582	-0.554821	-0.521003	-0.575374
1.381	-0.555215	-0.561311	-0.592278	-0.552306	-0.5197	-0.573314
1.382	-0.554492	-0.558264	-0.589814	-0.550032	-0.518136	-0.573526
1.383	-0.553566	-0.554952	-0.587283	-0.548008	-0.516258	-0.576268
1.384	-0.552231	-0.55129	-0.584775	-0.546185	-0.514142	-0.580132
1.385	-0.550395	-0.547491	-0.582268	-0.544505	-0.511893	-0.58344
1.386	-0.548271	-0.543911	-0.579645	-0.542879	-0.509557	-0.585209
1.387	-0.546484	-0.54069	-0.576807	-0.541212	-0.507136	-0.584995
1.388	-0.545414	-0.537858	-0.573867	-0.539713	-0.504669	-0.582693
1.389	-0.544651	-0.535482	-0.571128	-0.539014	-0.502302	-0.578544
1.39	-0.543549	-0.53356	-0.568736	-0.539315	-0.50024	-0.573075
1.391	-0.541792	-0.531926	-0.566558	-0.539913	-0.499082	-0.566844
1.392	-0.539403	-0.530314	-0.564622	-0.539985	-0.499976	-0.560417
1.393	-0.536507	-0.528534	-0.563207	-0.539232	-0.503114	-0.554457
1.394	-0.533144	-0.526647	-0.562152	-0.53772	-0.506957	-0.549412
1.395	-0.529344	-0.524864	-0.560742	-0.535404	-0.509713	-0.545275
1.396	-0.525192	-0.523314	-0.558441	-0.532092	-0.510408	-0.541824
1.397	-0.520773	-0.521985	-0.555282	-0.527832	-0.508786	-0.538847
1.398	-0.516087	-0.520802	-0.551584	-0.523044	-0.504995	-0.536143
1.399	-0.511	-0.519707	-0.547555	-0.518287	-0.499385	-0.533493
1.4	-0.505531	-0.518707	-0.54312	-0.513897	-0.492503	-0.530637
1.401	-0.499983	-0.517852	-0.537975	-0.509914	-0.48504	-0.527361
1.402	-0.494629	-0.517096	-0.531816	-0.506295	-0.477627	-0.523544
1.403	-0.489572	-0.516244	-0.524427	-0.503025	-0.470619	-0.519117
1.404	-0.484839	-0.515127	-0.515684	-0.50003	-0.464112	-0.514153
1.405	-0.480402	-0.513761	-0.50594	-0.497199	-0.45816	-0.508884
1.406	-0.476248	-0.512233	-0.496186	-0.494528	-0.452866	-0.503566
1.407	-0.472478	-0.510585	-0.487457	-0.492061	-0.448366	-0.498446
1.408	-0.469297	-0.508873	-0.48038	-0.489725	-0.444809	-0.493856
1.409	-0.466996	-0.50723	-0.475307	-0.487491	-0.442331	-0.49024
1.41	-0.465858	-0.505803	-0.472458	-0.485479	-0.441006	-0.487907
1.411	-0.466023	-0.504573	-0.471829	-0.483784	-0.440768	-0.486953
1.412	-0.467411	-0.503333	-0.473158	-0.482393	-0.441405	-0.487418
1.413	-0.469756	-0.501869	-0.475938	-0.481229	-0.442582	-0.489179
1.414	-0.472693	-0.500115	-0.479524	-0.480229	-0.443902	-0.491816
1.415	-0.475855	-0.498175	-0.483386	-0.479306	-0.445054	-0.494781
1.416	-0.478909	-0.496127	-0.487167	-0.47827	-0.445848	-0.497556
1.417	-0.481514	-0.493963	-0.490558	-0.476946	-0.446138	-0.499759
1.418	-0.483445	-0.491771	-0.4933	-0.475296	-0.445809	-0.501249
1.419	-0.484721	-0.489704	-0.495154	-0.47342	-0.444854	-0.502056
1.42	-0.485347	-0.487852	-0.495946	-0.471528	-0.443399	-0.50217
1.421	-0.485175	-0.486303	-0.49579	-0.469765	-0.441638	-0.501537
1.422	-0.484173	-0.485139	-0.494991	-0.468049	-0.439798	-0.500242
1.423	-0.482517	-0.484357	-0.49376	-0.466176	-0.438054	-0.498573
1.424	-0.480418	-0.483875	-0.49226	-0.46403	-0.436412	-0.496775
1.425	-0.478126	-0.483533	-0.490637	-0.461704	-0.43483	-0.494813
1.426	-0.47601	-0.483122	-0.488946	-0.459406	-0.433347	-0.492569
1.427	-0.474401	-0.482479	-0.487142	-0.457314	-0.431997	-0.490107
1.428	-0.473392	-0.481561	-0.485077	-0.455523	-0.430767	-0.487586
1.429	-0.472811	-0.480445	-0.482698	-0.453998	-0.429682	-0.485181
1.43	-0.472283	-0.479242	-0.480224	-0.452595	-0.428757	-0.483101
1.431	-0.471524	-0.477998	-0.477894	-0.45121	-0.427921	-0.481407
1.432	-0.470511	-0.476782	-0.475758	-0.449874	-0.427112	-0.480052
1.433	-0.469239	-0.475653	-0.473828	-0.448642	-0.426274	-0.479106
1.434	-0.467618	-0.474527	-0.472176	-0.447419	-0.425313	-0.478579
1.435	-0.465617	-0.473333	-0.470887	-0.446082	-0.424184	-0.478238
1.436	-0.463316	-0.4721	-0.469895	-0.444684	-0.422911	-0.477813
1.437	-0.460867	-0.470785	-0.469018	-0.443354	-0.421573	-0.47714
1.438	-0.458393	-0.469255	-0.468227	-0.442133	-0.420201	-0.476062
1.439	-0.455978	-0.467537	-0.467539	-0.44094	-0.41865	-0.474385
1.44	-0.45372	-0.465862	-0.466851	-0.439669	-0.416796	-0.47201
1.441	-0.451638	-0.464371	-0.466109	-0.438305	-0.414774	-0.469043
1.442	-0.449763	-0.463068	-0.465295	-0.436953	-0.41283	-0.465728
1.443	-0.448232	-0.461937	-0.464257	-0.435786	-0.411125	-0.462311
1.444	-0.447076	-0.460896	-0.462798	-0.434946	-0.409785	-0.458967
1.445	-0.446137	-0.459858	-0.460965	-0.434448	-0.408907	-0.455798
1.446	-0.445212	-0.45881	-0.459092	-0.434216	-0.408442	-0.452886
1.447	-0.444192	-0.457735	-0.457398	-0.434173	-0.40822	-0.450279
1.448	-0.443095	-0.456594	-0.455739	-0.434205	-0.408095	-0.44796
1.449	-0.442017	-0.455418	-0.453913	-0.434133	-0.407959	-0.445943
1.45	-0.441103	-0.454288	-0.451936	-0.433853	-0.407644	-0.444255
1.451	-0.440441	-0.453179	-0.449975	-0.433379	-0.407015	-0.442809
1.452	-0.439962	-0.451962	-0.448203	-0.432721	-0.406122	-0.441415
1.453	-0.43952	-0.450582	-0.446736	-0.431901	-0.405093	-0.439974
1.454	-0.438983	-0.449173	-0.445607	-0.431067	-0.403925	-0.438562
1.455	-0.438292	-0.447904	-0.444701	-0.430382	-0.402495	-0.437294
1.456	-0.437519	-0.446832	-0.443854	-0.429827	-0.40071	-0.436165
1.457	-0.43683	-0.445967	-0.44305	-0.429255	-0.398562	-0.435092
1.458	-0.436371	-0.445281	-0.442356	-0.428613	-0.396134	-0.434054
1.459	-0.436157	-0.444697	-0.441824	-0.427896	-0.39358	-0.433119
1.46	-0.436022	-0.444034	-0.441402	-0.42697	-0.390983	-0.432358
1.461	-0.435689	-0.443081	-0.440968	-0.425732	-0.388354	-0.431758
1.462	-0.434962	-0.441827	-0.440408	-0.424308	-0.385809	-0.431192
1.463	-0.433901	-0.44041	-0.439654	-0.42292	-0.383516	-0.430491
1.464	-0.432765	-0.438921	-0.438696	-0.421746	-0.381557	-0.429624
1.465	-0.431736	-0.437402	-0.437564	-0.420843	-0.380003	-0.428671
1.466	-0.430792	-0.435907	-0.436352	-0.42014	-0.378929	-0.427708
1.467	-0.42989	-0.434583	-0.435164	-0.419607	-0.378329	-0.426771
1.468	-0.429093	-0.433599	-0.433907	-0.419336	-0.378127	-0.425838
1.469	-0.42842	-0.432852	-0.432347	-0.419466	-0.378183	-0.424891
1.47	-0.427769	-0.432024	-0.430493	-0.420034	-0.378285	-0.423924
1.471	-0.427096	-0.430951	-0.42865	-0.4209	-0.378204	-0.42288
1.472	-0.426438	-0.429695	-0.427066	-0.421837	-0.377792	-0.421683
1.473	-0.425715	-0.428382	-0.425748	-0.422656	-0.377	-0.4203
1.474	-0.424706	-0.427055	-0.424589	-0.423283	-0.375853	-0.418685
1.475	-0.423242	-0.425686	-0.423548	-0.423727	-0.374426	-0.416706
1.476	-0.421397	-0.424269	-0.422688	-0.423965	-0.37289	-0.414358
1.477	-0.419495	-0.422813	-0.422066	-0.423935	-0.371564	-0.411941
1.478	-0.417817	-0.42134	-0.421659	-0.4236	-0.37069	-0.409767
1.479	-0.41643	-0.419953	-0.421364	-0.422878	-0.370203	-0.40788
1.48	-0.41524	-0.418766	-0.420927	-0.421627	-0.369861	-0.406156
1.481	-0.414078	-0.417701	-0.41993	-0.41983	-0.369399	-0.404405
1.482	-0.412823	-0.416539	-0.418038	-0.417529	-0.368667	-0.402494
1.483	-0.411495	-0.415198	-0.415326	-0.41473	-0.367709	-0.400462
1.484	-0.410241	-0.413805	-0.412218	-0.411637	-0.366578	-0.398466
1.485	-0.409212	-0.412503	-0.409084	-0.408659	-0.365216	-0.39661
1.486	-0.408461	-0.411317	-0.406	-0.406048	-0.363584	-0.394862
1.487	-0.40796	-0.410135	-0.402932	-0.403763	-0.3618	-0.393128
1.488	-0.407592	-0.408839	-0.4	-0.401655	-0.360041	-0.391345
1.489	-0.407252	-0.407467	-0.397478	-0.399521	-0.358349	-0.389611
1.49	-0.406947	-0.406156	-0.395532	-0.397182	-0.356657	-0.388161
1.491	-0.406646	-0.404989	-0.394092	-0.394657	-0.354943	-0.387155
1.492	-0.406182	-0.403959	-0.392995	-0.392117	-0.35322	-0.386572
1.493	-0.405439	-0.40302	-0.392062	-0.389763	-0.351491	-0.386231
1.494	-0.404424	-0.402168	-0.391177	-0.387848	-0.349873	-0.385901
1.495	-0.403147	-0.401391	-0.390334	-0.386582	-0.348613	-0.385398
1.496	-0.401597	-0.400512	-0.38949	-0.385941	-0.347819	-0.384668
1.497	-0.39986	-0.39929	-0.388564	-0.385693	-0.347329	-0.383783
1.498	-0.398225	-0.397703	-0.387557	-0.385607	-0.346913	-0.382755
1.499	-0.396995	-0.395978	-0.386521	-0.385636	-0.346526	-0.381539
1.5	-0.396141	-0.394307	-0.385535	-0.385808	-0.346216	-0.380199
1.501	-0.395343	-0.392678	-0.384609	-0.385974	-0.345919	-0.378794
1.502	-0.394344	-0.391056	-0.383568	-0.38585	-0.345508	-0.377376
1.503	-0.393104	-0.389443	-0.382099	-0.385285	-0.344909	-0.376072
1.504	-0.391636	-0.38774	-0.379845	-0.384387	-0.344133	-0.374958
1.505	-0.389852	-0.385709	-0.376567	-0.383396	-0.34324	-0.374037
1.506	-0.387704	-0.38312	-0.372438	-0.382546	-0.342135	-0.373308
1.507	-0.385427	-0.37983	-0.368119	-0.381943	-0.340639	-0.372706
1.508	-0.383388	-0.37579	-0.364351	-0.38156	-0.338834	-0.372128
1.509	-0.381707	-0.37132	-0.361547	-0.381362	-0.336943	-0.371499
1.51	-0.3803	-0.367129	-0.359751	-0.381357	-0.335046	-0.37077
1.511	-0.379134	-0.363783	-0.35882	-0.381585	-0.333081	-0.369848
1.512	-0.378281	-0.361556	-0.358657	-0.382072	-0.330955	-0.368643
1.513	-0.377789	-0.360663	-0.359195	-0.382692	-0.328673	-0.367166
1.514	-0.377571	-0.361125	-0.360127	-0.383177	-0.326289	-0.365442
1.515	-0.377467	-0.362634	-0.360991	-0.383236	-0.323786	-0.363468
1.516	-0.377332	-0.364755	-0.361565	-0.382682	-0.321081	-0.361382
1.517	-0.377038	-0.367005	-0.361836	-0.381528	-0.31799	-0.359408
1.518	-0.376511	-0.368837	-0.361782	-0.379956	-0.314397	-0.35764
1.519	-0.375758	-0.369838	-0.361401	-0.378227	-0.310507	-0.355971
1.52	-0.374838	-0.369923	-0.360766	-0.376483	-0.306725	-0.354229
1.521	-0.373829	-0.369252	-0.360047	-0.37466	-0.303441	-0.352374
1.522	-0.372756	-0.368036	-0.359449	-0.372679	-0.301005	-0.35051
1.523	-0.371656	-0.366509	-0.359059	-0.370562	-0.299707	-0.348745
1.524	-0.370666	-0.364899	-0.358785	-0.368408	-0.299624	-0.347156
1.525	-0.369916	-0.363386	-0.358483	-0.366267	-0.30057	-0.345826
1.526	-0.369395	-0.362129	-0.358074	-0.364053	-0.302233	-0.344756
1.527	-0.36898	-0.361187	-0.357495	-0.361706	-0.304223	-0.343706
1.528	-0.368542	-0.360489	-0.356667	-0.35933	-0.306122	-0.342364
1.529	-0.367967	-0.359979	-0.355568	-0.357061	-0.307673	-0.340674
1.53	-0.367126	-0.359642	-0.354226	-0.35497	-0.308761	-0.338813
1.531	-0.365917	-0.359437	-0.352705	-0.353188	-0.309244	-0.336949
1.532	-0.364339	-0.359323	-0.351165	-0.351856	-0.309032	-0.335188
1.533	-0.362571	-0.359222	-0.349844	-0.350925	-0.30829	-0.333586
1.534	-0.36086	-0.358995	-0.348862	-0.350235	-0.307359	-0.332172
1.535	-0.359346	-0.358546	-0.348131	-0.349592	-0.30642	-0.330981
1.536	-0.358062	-0.357926	-0.347557	-0.348737	-0.305532	-0.330038
1.537	-0.356986	-0.357222	-0.347154	-0.347431	-0.304773	-0.329357
1.538	-0.356067	-0.356413	-0.346925	-0.345463	-0.304098	-0.32896
1.539	-0.355248	-0.355467	-0.34677	-0.342636	-0.303392	-0.328807
1.54	-0.354546	-0.354454	-0.346509	-0.338954	-0.302688	-0.328763
1.541	-0.354043	-0.353498	-0.346022	-0.334707	-0.302084	-0.328704
1.542	-0.353764	-0.352624	-0.345298	-0.330319	-0.301606	-0.328567
1.543	-0.353707	-0.351714	-0.344376	-0.326223	-0.301158	-0.328313
1.544	-0.353841	-0.350743	-0.343296	-0.32286	-0.300555	-0.327844
1.545	-0.354029	-0.349805	-0.342075	-0.32064	-0.299751	-0.32707
1.546	-0.35409	-0.348884	-0.340734	-0.319773	-0.298921	-0.326098
1.547	-0.353831	-0.347918	-0.339369	-0.320263	-0.298207	-0.325175
1.548	-0.353099	-0.346938	-0.338076	-0.322006	-0.297552	-0.324501
1.549	-0.35194	-0.34594	-0.336814	-0.324705	-0.296905	-0.324148
1.55	-0.350581	-0.344876	-0.335444	-0.327892	-0.296295	-0.324
1.551	-0.349211	-0.343701	-0.333847	-0.331097	-0.295689	-0.323875
1.552	-0.347888	-0.342302	-0.332056	-0.333942	-0.29499	-0.323699
1.553	-0.346687	-0.340602	-0.330273	-0.336178	-0.294134	-0.323425
1.554	-0.345773	-0.33873	-0.328675	-0.337703	-0.293137	-0.322964
1.555	-0.345251	-0.33695	-0.327243	-0.338513	-0.2921	-0.321987
1.556	-0.345071	-0.335465	-0.325871	-0.338657	-0.291143	-0.319777
1.557	-0.345111	-0.334417	-0.324619	-0.338284	-0.290298	-0.316035
1.558	-0.345304	-0.333826	-0.32373	-0.3376	-0.289508	-0.311433
1.559	-0.345646	-0.33354	-0.323265	-0.336743	-0.288736	-0.307073
1.56	-0.346074	-0.333404	-0.322757	-0.335782	-0.288054	-0.303885
1.561	-0.346398	-0.333286	-0.321419	-0.33476	-0.287616	-0.302281
1.562	-0.346474	-0.332994	-0.318769	-0.33365	-0.287481	-0.302106
1.563	-0.346349	-0.332494	-0.31495	-0.332417	-0.287498	-0.302985
1.564	-0.346112	-0.332006	-0.310562	-0.331179	-0.287481	-0.304631
1.565	-0.345709	-0.33169	-0.306314	-0.330111	-0.287392	-0.306694
1.566	-0.345077	-0.331427	-0.302704	-0.329262	-0.287193	-0.308614
1.567	-0.34423	-0.331068	-0.299961	-0.328575	-0.286735	-0.30987
1.568	-0.343105	-0.33067	-0.298256	-0.327951	-0.28594	-0.310241
1.569	-0.341615	-0.330291	-0.297789	-0.327281	-0.284894	-0.309711
1.57	-0.33982	-0.329811	-0.298578	-0.326509	-0.283751	-0.308352
1.571	-0.337873	-0.329005	-0.300413	-0.325653	-0.28266	-0.306427
1.572	-0.335924	-0.32772	-0.303027	-0.324713	-0.281713	-0.304338
1.573	-0.334083	-0.325982	-0.306188	-0.323732	-0.280949	-0.302476
1.574	-0.332411	-0.323873	-0.309606	-0.322839	-0.280335	-0.301194
1.575	-0.330954	-0.321521	-0.312843	-0.322099	-0.279806	-0.300684
1.576	-0.329698	-0.319105	-0.315527	-0.321458	-0.279314	-0.300878
1.577	-0.328493	-0.316685	-0.317556	-0.320881	-0.278728	-0.301595
1.578	-0.327163	-0.314251	-0.318912	-0.320471	-0.277867	-0.302673
1.579	-0.325694	-0.311844	-0.319495	-0.32035	-0.276735	-0.303893
1.58	-0.32414	-0.309462	-0.319274	-0.320435	-0.275492	-0.304972
1.581	-0.322525	-0.30709	-0.318418	-0.320479	-0.274226	-0.305671
1.582	-0.32093	-0.304844	-0.317226	-0.320314	-0.272972	-0.305854
1.583	-0.319497	-0.302955	-0.315939	-0.319876	-0.27183	-0.305436
1.584	-0.318301	-0.301648	-0.31462	-0.319132	-0.27093	-0.304378
1.585	-0.317334	-0.30093	-0.313255	-0.318107	-0.270412	-0.302795
1.586	-0.316569	-0.300527	-0.311876	-0.316865	-0.270318	-0.300931
1.587	-0.315995	-0.300106	-0.310515	-0.315496	-0.270387	-0.298932
1.588	-0.31567	-0.299451	-0.309181	-0.314138	-0.270282	-0.296814
1.589	-0.315712	-0.29845	-0.307828	-0.312846	-0.26995	-0.294622
1.59	-0.316125	-0.297073	-0.306371	-0.311572	-0.269481	-0.292505
1.591	-0.316732	-0.295392	-0.304829	-0.31034	-0.268915	-0.290614
1.592	-0.317315	-0.293495	-0.303313	-0.309187	-0.26831	-0.288969
1.593	-0.317731	-0.291473	-0.301905	-0.308059	-0.267733	-0.287479
1.594	-0.317931	-0.289511	-0.300686	-0.306873	-0.267178	-0.286075
1.595	-0.317928	-0.28785	-0.299742	-0.305665	-0.266651	-0.284775
1.596	-0.317701	-0.286581	-0.299052	-0.304675	-0.266264	-0.283645
1.597	-0.317204	-0.285601	-0.298475	-0.304078	-0.266128	-0.28274
1.598	-0.316495	-0.284831	-0.297836	-0.303744	-0.266166	-0.282058
1.599	-0.315688	-0.284348	-0.296899	-0.303462	-0.266204	-0.281546
1.6	-0.314874	-0.284172	-0.295465	-0.303175	-0.26618	-0.281153
1.601	-0.314164	-0.284138	-0.293663	-0.302879	-0.26606	-0.280859
1.602	-0.313644	-0.284046	-0.29189	-0.302489	-0.265723	-0.280644
1.603	-0.31335	-0.283752	-0.290416	-0.301875	-0.265054	-0.280483
1.604	-0.313422	-0.283179	-0.289292	-0.300974	-0.26412	-0.280342
1.605	-0.313953	-0.282343	-0.288497	-0.299824	-0.263127	-0.28017
1.606	-0.314775	-0.281321	-0.2879	-0.298505	-0.262214	-0.279933
1.607	-0.315637	-0.280179	-0.287308	-0.297047	-0.261376	-0.279579
1.608	-0.316337	-0.27889	-0.286676	-0.295455	-0.26057	-0.27902
1.609	-0.316634	-0.27743	-0.286059	-0.293758	-0.259775	-0.278205
1.61	-0.316339	-0.275971	-0.285384	-0.291943	-0.258959	-0.277057
1.611	-0.315434	-0.274794	-0.284518	-0.290021	-0.258041	-0.275477
1.612	-0.314121	-0.274038	-0.28345	-0.28817	-0.256988	-0.27357
1.613	-0.312742	-0.273674	-0.28223	-0.286738	-0.255929	-0.2716
1.614	-0.311453	-0.273703	-0.280904	-0.286022	-0.254945	-0.269707
1.615	-0.310013	-0.274156	-0.27956	-0.28607	-0.253994	-0.267931
1.616	-0.308118	-0.274918	-0.27832	-0.286758	-0.253096	-0.266388
1.617	-0.305861	-0.275818	-0.277284	-0.287859	-0.25225	-0.265226
1.618	-0.30362	-0.276781	-0.276532	-0.289042	-0.25135	-0.264472
1.619	-0.301695	-0.277747	-0.276156	-0.289985	-0.250367	-0.263972
1.62	-0.300247	-0.278605	-0.2762	-0.290549	-0.249406	-0.263527
1.621	-0.299364	-0.279226	-0.276579	-0.290751	-0.248562	-0.263095
1.622	-0.298976	-0.279432	-0.27711	-0.290619	-0.247851	-0.262716
1.623	-0.298819	-0.279128	-0.277646	-0.290207	-0.24726	-0.26241
1.624	-0.298717	-0.278476	-0.278149	-0.289643	-0.246807	-0.262147
1.625	-0.298669	-0.277691	-0.278632	-0.28906	-0.246488	-0.261784
1.626	-0.298661	-0.276871	-0.27909	-0.288608	-0.246247	-0.26112
1.627	-0.298667	-0.276071	-0.279444	-0.288384	-0.245994	-0.260062
1.628	-0.298699	-0.275313	-0.279592	-0.288283	-0.24564	-0.25873
1.629	-0.298742	-0.274617	-0.279479	-0.288141	-0.245204	-0.257414
1.63	-0.298711	-0.273998	-0.279127	-0.287896	-0.244784	-0.256349
1.631	-0.298534	-0.273386	-0.278656	-0.287454	-0.244388	-0.255623
1.632	-0.298265	-0.27271	-0.278203	-0.286677	-0.243919	-0.255224
1.633	-0.298048	-0.27203	-0.277848	-0.28548	-0.24329	-0.255012
1.634	-0.297983	-0.271428	-0.277629	-0.283884	-0.242514	-0.254817
1.635	-0.298076	-0.270861	-0.277573	-0.28205	-0.241669	-0.254563
1.636	-0.298289	-0.270242	-0.277646	-0.280253	-0.240858	-0.254274
1.637	-0.298526	-0.269578	-0.277722	-0.278746	-0.240209	-0.253994
1.638	-0.298645	-0.268934	-0.277606	-0.27764	-0.239762	-0.253701
1.639	-0.298525	-0.268357	-0.27694	-0.276883	-0.239492	-0.253301
1.64	-0.298121	-0.267918	-0.275215	-0.276408	-0.239466	-0.252706
1.641	-0.297533	-0.267678	-0.272105	-0.276232	-0.239693	-0.251855
1.642	-0.297004	-0.267704	-0.267789	-0.276432	-0.239975	-0.250778
1.643	-0.296727	-0.268028	-0.262867	-0.277072	-0.240123	-0.249619
1.644	-0.29667	-0.26845	-0.258092	-0.278133	-0.240131	-0.248501
1.645	-0.296739	-0.268629	-0.254125	-0.279431	-0.240143	-0.247464
1.646	-0.296892	-0.268333	-0.251407	-0.280682	-0.240239	-0.24647
1.647	-0.297084	-0.267555	-0.250167	-0.281673	-0.240309	-0.245479
1.648	-0.29722	-0.266473	-0.250329	-0.282276	-0.240256	-0.244624
1.649	-0.297195	-0.265363	-0.25149	-0.282411	-0.240135	-0.244149
1.65	-0.296966	-0.264463	-0.253248	-0.282037	-0.23993	-0.244112
1.651	-0.29657	-0.26382	-0.255366	-0.281198	-0.239423	-0.244351
1.652	-0.296082	-0.263279	-0.257686	-0.280134	-0.238406	-0.244625
1.653	-0.295558	-0.262628	-0.26011	-0.279048	-0.236909	-0.244658
1.654	-0.295071	-0.261739	-0.262568	-0.277911	-0.235122	-0.244155
1.655	-0.294728	-0.260638	-0.264954	-0.276719	-0.233236	-0.242846
1.656	-0.294567	-0.259452	-0.267164	-0.275666	-0.231441	-0.240702
1.657	-0.294523	-0.25829	-0.269146	-0.27501	-0.229939	-0.238035
1.658	-0.294482	-0.257188	-0.270821	-0.274852	-0.228707	-0.235265
1.659	-0.294354	-0.256147	-0.272041	-0.275066	-0.227511	-0.23279
1.66	-0.294163	-0.255178	-0.27268	-0.275467	-0.226315	-0.230902
1.661	-0.294018	-0.254264	-0.272641	-0.27596	-0.22535	-0.229662
1.662	-0.293946	-0.25338	-0.271881	-0.276519	-0.224744	-0.229055
1.663	-0.293833	-0.252551	-0.270477	-0.277038	-0.224387	-0.229102
1.664	-0.293478	-0.251827	-0.26853	-0.277309	-0.224141	-0.229694
1.665	-0.292627	-0.251204	-0.266138	-0.277222	-0.223918	-0.230554
1.666	-0.291212	-0.250638	-0.263457	-0.276826	-0.223619	-0.23143
1.667	-0.289456	-0.250084	-0.260643	-0.276175	-0.223208	-0.232225
1.668	-0.287638	-0.249505	-0.257847	-0.275311	-0.222724	-0.232942
1.669	-0.285942	-0.248904	-0.255226	-0.274301	-0.222127	-0.233703
1.67	-0.284508	-0.248293	-0.252904	-0.273176	-0.221388	-0.234648
1.671	-0.283401	-0.247626	-0.250973	-0.272011	-0.22061	-0.23564
1.672	-0.282481	-0.246861	-0.249495	-0.270871	-0.219803	-0.23632
1.673	-0.281486	-0.246038	-0.248484	-0.269679	-0.21879	-0.236432
1.674	-0.280281	-0.245203	-0.247731	-0.268353	-0.217398	-0.235948
1.675	-0.278977	-0.244423	-0.24677	-0.266901	-0.215588	-0.234995
1.676	-0.277801	-0.243807	-0.245151	-0.265459	-0.213476	-0.233711
1.677	-0.276787	-0.243414	-0.242608	-0.264302	-0.211242	-0.232094
1.678	-0.275767	-0.243226	-0.239176	-0.263657	-0.209061	-0.230057
1.679	-0.274678	-0.243175	-0.235275	-0.263522	-0.207213	-0.227678
1.68	-0.273622	-0.243167	-0.23159	-0.263687	-0.205973	-0.225187
1.681	-0.272633	-0.243002	-0.228733	-0.263925	-0.205361	-0.222806
1.682	-0.271647	-0.242365	-0.22693	-0.264129	-0.205312	-0.220718
1.683	-0.270677	-0.24115	-0.22611	-0.264177	-0.205825	-0.21905
1.684	-0.26977	-0.239675	-0.226232	-0.263867	-0.206815	-0.217816
1.685	-0.268874	-0.238475	-0.227352	-0.263115	-0.208039	-0.216969
1.686	-0.267945	-0.237875	-0.229514	-0.262038	-0.20923	-0.216522
1.687	-0.266999	-0.237795	-0.232636	-0.260675	-0.210212	-0.216559
1.688	-0.26605	-0.23795	-0.236491	-0.258954	-0.210922	-0.217093
1.689	-0.26513	-0.238089	-0.240766	-0.256918	-0.211329	-0.217991
1.69	-0.264353	-0.238075	-0.24508	-0.254736	-0.21137	-0.219084
1.691	-0.263881	-0.237838	-0.249046	-0.252633	-0.210883	-0.220257
1.692	-0.26378	-0.23729	-0.252331	-0.250874	-0.209685	-0.221335
1.693	-0.263983	-0.236366	-0.254619	-0.249624	-0.207833	-0.222011
1.694	-0.264392	-0.235091	-0.255745	-0.24888	-0.205714	-0.222137
1.695	-0.264851	-0.233598	-0.255808	-0.248632	-0.2038	-0.221892
1.696	-0.265067	-0.232058	-0.255063	-0.248831	-0.202385	-0.221454
1.697	-0.264856	-0.230621	-0.253775	-0.24931	-0.201624	-0.220841
1.698	-0.264343	-0.22938	-0.252119	-0.249947	-0.201644	-0.220078
1.699	-0.263686	-0.228258	-0.250172	-0.250718	-0.202423	-0.21926
1.7	-0.262939	-0.227075	-0.248044	-0.251528	-0.203685	-0.21845
1.701	-0.262143	-0.225743	-0.245879	-0.252226	-0.205152	-0.217665
1.702	-0.261325	-0.224291	-0.243764	-0.252777	-0.206702	-0.217033
1.703	-0.260572	-0.222851	-0.241726	-0.253282	-0.208187	-0.216719
1.704	-0.260057	-0.221587	-0.239738	-0.253847	-0.209341	-0.216632
1.705	-0.259842	-0.22056	-0.237817	-0.254515	-0.209853	-0.21651
1.706	-0.259856	-0.219708	-0.236063	-0.25524	-0.209464	-0.216264
1.707	-0.260028	-0.218896	-0.234512	-0.255912	-0.208179	-0.216024
1.708	-0.260324	-0.21799	-0.233142	-0.256325	-0.206334	-0.215908
1.709	-0.260713	-0.217009	-0.231986	-0.256221	-0.204363	-0.215896
1.71	-0.261092	-0.216137	-0.231072	-0.255641	-0.202611	-0.215925
1.711	-0.2614	-0.215571	-0.230349	-0.254974	-0.201281	-0.215963
1.712	-0.261775	-0.215415	-0.229724	-0.254497	-0.200377	-0.215997
1.713	-0.262376	-0.215633	-0.229108	-0.254149	-0.199754	-0.216086
1.714	-0.263124	-0.216063	-0.2284	-0.253805	-0.199263	-0.21631
1.715	-0.26373	-0.216517	-0.227471	-0.253487	-0.198819	-0.216637
1.716	-0.264001	-0.216786	-0.226249	-0.253158	-0.198383	-0.217032
1.717	-0.264043	-0.216686	-0.224722	-0.252653	-0.19792	-0.217554
1.718	-0.264097	-0.216176	-0.2229	-0.251821	-0.197404	-0.218214
1.719	-0.264304	-0.215278	-0.220915	-0.250561	-0.196921	-0.218945
1.72	-0.26465	-0.213974	-0.218992	-0.24899	-0.196625	-0.219645
1.721	-0.264987	-0.212302	-0.217245	-0.247493	-0.19652	-0.220097
1.722	-0.265144	-0.210467	-0.215769	-0.246394	-0.196417	-0.220011
1.723	-0.265103	-0.208786	-0.214793	-0.245777	-0.196143	-0.21918
1.724	-0.264925	-0.20752	-0.214512	-0.245623	-0.195652	-0.217546
1.725	-0.26459	-0.206731	-0.214834	-0.245849	-0.195077	-0.215236
1.726	-0.264044	-0.206296	-0.21545	-0.246192	-0.194705	-0.212576
1.727	-0.263215	-0.20614	-0.21596	-0.246281	-0.194709	-0.209929
1.728	-0.26196	-0.206344	-0.215797	-0.245881	-0.19497	-0.207509
1.729	-0.26026	-0.206904	-0.214331	-0.245005	-0.195186	-0.205417
1.73	-0.258344	-0.207603	-0.211161	-0.243874	-0.195015	-0.20373
1.731	-0.256429	-0.208254	-0.206227	-0.242802	-0.194215	-0.202503
1.732	-0.254551	-0.208821	-0.199786	-0.241944	-0.192883	-0.201776
1.733	-0.252785	-0.209284	-0.192471	-0.241247	-0.191369	-0.201542
1.734	-0.251404	-0.209585	-0.185232	-0.240668	-0.189957	-0.201617
1.735	-0.25068	-0.209658	-0.179093	-0.240187	-0.188822	-0.201688
1.736	-0.250657	-0.209458	-0.174948	-0.239738	-0.188106	-0.201572
1.737	-0.251114	-0.209027	-0.173351	-0.239179	-0.187776	-0.201254
1.738	-0.251698	-0.208529	-0.174377	-0.238279	-0.187558	-0.200713
1.739	-0.252144	-0.208117	-0.17777	-0.236827	-0.187238	-0.1998
1.74	-0.252391	-0.207783	-0.183066	-0.234755	-0.186785	-0.198297
1.741	-0.252551	-0.207407	-0.189675	-0.232171	-0.186164	-0.196216
1.742	-0.252744	-0.206918	-0.197043	-0.229382	-0.185364	-0.193918
1.743	-0.2529	-0.206404	-0.204651	-0.226813	-0.184542	-0.191835
1.744	-0.252829	-0.205977	-0.211915	-0.224848	-0.18398	-0.190226
1.745	-0.252517	-0.20558	-0.218294	-0.22377	-0.183873	-0.189204
1.746	-0.252171	-0.205133	-0.223465	-0.223739	-0.184164	-0.188818
1.747	-0.251956	-0.204672	-0.227354	-0.224673	-0.184601	-0.189026
1.748	-0.251927	-0.204205	-0.230104	-0.226266	-0.184918	-0.189683
1.749	-0.252064	-0.203745	-0.231981	-0.228209	-0.184921	-0.19061
1.75	-0.252245	-0.203352	-0.233149	-0.230331	-0.184435	-0.191632
1.751	-0.252384	-0.203041	-0.23364	-0.232515	-0.183306	-0.19258
1.752	-0.252552	-0.202815	-0.233565	-0.234636	-0.181548	-0.193323
1.753	-0.252829	-0.20274	-0.233074	-0.236596	-0.179414	-0.193731
1.754	-0.25317	-0.202898	-0.232263	-0.238328	-0.177318	-0.19363
1.755	-0.253524	-0.203348	-0.23123	-0.239758	-0.17567	-0.192929
1.756	-0.253853	-0.20408	-0.229989	-0.240833	-0.174748	-0.191702
1.757	-0.254119	-0.204965	-0.228475	-0.241491	-0.174616	-0.190125
1.758	-0.254296	-0.205804	-0.226767	-0.241648	-0.175082	-0.188382
1.759	-0.254284	-0.206448	-0.225073	-0.241361	-0.175801	-0.186576
1.76	-0.253876	-0.206853	-0.223559	-0.240852	-0.176493	-0.184755
1.761	-0.252966	-0.20702	-0.222257	-0.240368	-0.177137	-0.183094
1.762	-0.251734	-0.206968	-0.22107	-0.240099	-0.177964	-0.181853
1.763	-0.250504	-0.206745	-0.219919	-0.240128	-0.179118	-0.18104
1.764	-0.249429	-0.206455	-0.218817	-0.24039	-0.180482	-0.180357
1.765	-0.2484	-0.206283	-0.217733	-0.240657	-0.181884	-0.179609
1.766	-0.24732	-0.206338	-0.216587	-0.240709	-0.183231	-0.17889
1.767	-0.246254	-0.206588	-0.215376	-0.240475	-0.184449	-0.178389
1.768	-0.245261	-0.206938	-0.214179	-0.239957	-0.185401	-0.178219
1.769	-0.244266	-0.207247	-0.21305	-0.239225	-0.185871	-0.178335
1.77	-0.243143	-0.207432	-0.21194	-0.238459	-0.185728	-0.178474
1.771	-0.241881	-0.20749	-0.210705	-0.237773	-0.185093	-0.178289
1.772	-0.240591	-0.207451	-0.209276	-0.237088	-0.184185	-0.177638
1.773	-0.239363	-0.207414	-0.207749	-0.23633	-0.183118	-0.176613
1.774	-0.23822	-0.207352	-0.206252	-0.235562	-0.18197	-0.175414
1.775	-0.237165	-0.207019	-0.204873	-0.234842	-0.180843	-0.174306
1.776	-0.236253	-0.206261	-0.203729	-0.234177	-0.179843	-0.173516
1.777	-0.235568	-0.205069	-0.202896	-0.233549	-0.179055	-0.173103
1.778	-0.235143	-0.203441	-0.202396	-0.2329	-0.178437	-0.173101
1.779	-0.234874	-0.201459	-0.202265	-0.232157	-0.177883	-0.173606
1.78	-0.234544	-0.199308	-0.202415	-0.231322	-0.177427	-0.174662
1.781	-0.233986	-0.197225	-0.202528	-0.230503	-0.177157	-0.176243
1.782	-0.233199	-0.19541	-0.202332	-0.229897	-0.17705	-0.178194
1.783	-0.232289	-0.193874	-0.201783	-0.229591	-0.176998	-0.180214
1.784	-0.231259	-0.192511	-0.200901	-0.229494	-0.176886	-0.182053
1.785	-0.229934	-0.191206	-0.199781	-0.229502	-0.176649	-0.183638
1.786	-0.228122	-0.189792	-0.198606	-0.229442	-0.176301	-0.185029
1.787	-0.22576	-0.188152	-0.197486	-0.229052	-0.175975	-0.186288
1.788	-0.222991	-0.186327	-0.196468	-0.228176	-0.175751	-0.18737
1.789	-0.220095	-0.184438	-0.195663	-0.226805	-0.175466	-0.188114
1.79	-0.217305	-0.182648	-0.195208	-0.225044	-0.174884	-0.188448
1.791	-0.214804	-0.181125	-0.1951	-0.223091	-0.173952	-0.188546
1.792	-0.21282	-0.180004	-0.195199	-0.221151	-0.172718	-0.18859
1.793	-0.211562	-0.179317	-0.195379	-0.219422	-0.171166	-0.188485
1.794	-0.211119	-0.178948	-0.19562	-0.218141	-0.169275	-0.187945
1.795	-0.211403	-0.178734	-0.195958	-0.217512	-0.167184	-0.186789
1.796	-0.2122	-0.178577	-0.196423	-0.217522	-0.165251	-0.185147
1.797	-0.21329	-0.178438	-0.196882	-0.217966	-0.163837	-0.183417
1.798	-0.21449	-0.178187	-0.196925	-0.218601	-0.162964	-0.181937
1.799	-0.215621	-0.17762	-0.196048	-0.219131	-0.162392	-0.180761
1.8	-0.216543	-0.176674	-0.193976	-0.219274	-0.162002	-0.179784
1.801	-0.21725	-0.17548	-0.190708	-0.218961	-0.161824	-0.178922
1.802	-0.217789	-0.174156	-0.186363	-0.218357	-0.161833	-0.178076
1.803	-0.218124	-0.172753	-0.1812	-0.217709	-0.161928	-0.177068
1.804	-0.218096	-0.171374	-0.175729	-0.217165	-0.161979	-0.17577
1.805	-0.217561	-0.170166	-0.17053	-0.216736	-0.161792	-0.174235
1.806	-0.216589	-0.169231	-0.165926	-0.2164	-0.161161	-0.172666
1.807	-0.2154	-0.168533	-0.161949	-0.216273	-0.160012	-0.171207
1.808	-0.21415	-0.167953	-0.15858	-0.216606	-0.158404	-0.169756
1.809	-0.212941	-0.16749	-0.155993	-0.217545	-0.15644	-0.168158
1.81	-0.211978	-0.167269	-0.154526	-0.219018	-0.154303	-0.166545
1.811	-0.211497	-0.167443	-0.154375	-0.220879	-0.152281	-0.165201
1.812	-0.211489	-0.16806	-0.155517	-0.222956	-0.150665	-0.164247
1.813	-0.211732	-0.168971	-0.157906	-0.22495	-0.149641	-0.163756
1.814	-0.21214	-0.169946	-0.16149	-0.226477	-0.149234	-0.163861
1.815	-0.212769	-0.170841	-0.166136	-0.227254	-0.149375	-0.164508
1.816	-0.213597	-0.171687	-0.171675	-0.227223	-0.149977	-0.165401
1.817	-0.214461	-0.172637	-0.177843	-0.226582	-0.150847	-0.166202
1.818	-0.215078	-0.173749	-0.184154	-0.225579	-0.151713	-0.166659
1.819	-0.215197	-0.174876	-0.190044	-0.224301	-0.152367	-0.166718
1.82	-0.214823	-0.175798	-0.19512	-0.222823	-0.152718	-0.166549
1.821	-0.214193	-0.176406	-0.199133	-0.221347	-0.152724	-0.16639
1.822	-0.21346	-0.176754	-0.201879	-0.220049	-0.152401	-0.166402
1.823	-0.212547	-0.177029	-0.203264	-0.218996	-0.151931	-0.166592
1.824	-0.211482	-0.177331	-0.20335	-0.218284	-0.151613	-0.166846
1.825	-0.210582	-0.177557	-0.202425	-0.218031	-0.151598	-0.167024
1.826	-0.210108	-0.177587	-0.200913	-0.218204	-0.151748	-0.167001
1.827	-0.209997	-0.177478	-0.199088	-0.218579	-0.151894	-0.166713
1.828	-0.210061	-0.177455	-0.197071	-0.218838	-0.152111	-0.166102
1.829	-0.210188	-0.177738	-0.195033	-0.218683	-0.152566	-0.165178
1.83	-0.210297	-0.178397	-0.193261	-0.218006	-0.153306	-0.164216
1.831	-0.210337	-0.179306	-0.191958	-0.216999	-0.15424	-0.163547
1.832	-0.210311	-0.180162	-0.191112	-0.215937	-0.155211	-0.163227
1.833	-0.210312	-0.180667	-0.190615	-0.21499	-0.156058	-0.163088
1.834	-0.210508	-0.180778	-0.190364	-0.214316	-0.156585	-0.162956
1.835	-0.210977	-0.180649	-0.190272	-0.21406	-0.156654	-0.162796
1.836	-0.211529	-0.180335	-0.190222	-0.214181	-0.156338	-0.16272
1.837	-0.211865	-0.179803	-0.190058	-0.214465	-0.155781	-0.162835
1.838	-0.211869	-0.179101	-0.189715	-0.214742	-0.15505	-0.163153
1.839	-0.211583	-0.178283	-0.189198	-0.214991	-0.154268	-0.163582
1.84	-0.211002	-0.177375	-0.188419	-0.215169	-0.153572	-0.163922
1.841	-0.210079	-0.176485	-0.187264	-0.215193	-0.152933	-0.164005
1.842	-0.208873	-0.175858	-0.18584	-0.215133	-0.152268	-0.163804
1.843	-0.207511	-0.175686	-0.184454	-0.215133	-0.151653	-0.163333
1.844	-0.206067	-0.175874	-0.18338	-0.215198	-0.151242	-0.162605
1.845	-0.204568	-0.176146	-0.182729	-0.215302	-0.151063	-0.161679
1.846	-0.203054	-0.176252	-0.18246	-0.215516	-0.151024	-0.160658
1.847	-0.201648	-0.17603	-0.182413	-0.215936	-0.151108	-0.159686
1.848	-0.200571	-0.175518	-0.182398	-0.216648	-0.151358	-0.158891
1.849	-0.200006	-0.174928	-0.182281	-0.217622	-0.151719	-0.158254
1.85	-0.199881	-0.174373	-0.18197	-0.218626	-0.152084	-0.157669
1.851	-0.199892	-0.173801	-0.181422	-0.21949	-0.152405	-0.157087
1.852	-0.199692	-0.173067	-0.180676	-0.220231	-0.152723	-0.156513
1.853	-0.199064	-0.171995	-0.179843	-0.220903	-0.153117	-0.156014
1.854	-0.198004	-0.170574	-0.178959	-0.221532	-0.153589	-0.155656
1.855	-0.196696	-0.168966	-0.177951	-0.222149	-0.154044	-0.155345
1.856	-0.195392	-0.167368	-0.17674	-0.222794	-0.154373	-0.154912
1.857	-0.194306	-0.165931	-0.175357	-0.223444	-0.154444	-0.154343
1.858	-0.193582	-0.164718	-0.173934	-0.223997	-0.154187	-0.153778
1.859	-0.193245	-0.163813	-0.172512	-0.224393	-0.15371	-0.153347
1.86	-0.193194	-0.16333	-0.171048	-0.224651	-0.153133	-0.15316
1.861	-0.193261	-0.163243	-0.169662	-0.224827	-0.152472	-0.153288
1.862	-0.193301	-0.163439	-0.168558	-0.224959	-0.15175	-0.153649
1.863	-0.193301	-0.163914	-0.167862	-0.224977	-0.151052	-0.154104
1.864	-0.193353	-0.164641	-0.167602	-0.224682	-0.150478	-0.154625
1.865	-0.193513	-0.165431	-0.16764	-0.223927	-0.15008	-0.155187
1.866	-0.19372	-0.166064	-0.167696	-0.222759	-0.149824	-0.155669
1.867	-0.193778	-0.16642	-0.167525	-0.22129	-0.149664	-0.155975
1.868	-0.193487	-0.166493	-0.167175	-0.219645	-0.149577	-0.156012
1.869	-0.192876	-0.166367	-0.166965	-0.217999	-0.149484	-0.155669
1.87	-0.192173	-0.166188	-0.167089	-0.216425	-0.149264	-0.154951
1.871	-0.1916	-0.166119	-0.167499	-0.21484	-0.148818	-0.153984
1.872	-0.191241	-0.16622	-0.168113	-0.213178	-0.14812	-0.152865
1.873	-0.191043	-0.166346	-0.168853	-0.211485	-0.147257	-0.151584
1.874	-0.190981	-0.166301	-0.169516	-0.209876	-0.14629	-0.150159
1.875	-0.191032	-0.166047	-0.169783	-0.208505	-0.14524	-0.148729
1.876	-0.191074	-0.165643	-0.16949	-0.207563	-0.144244	-0.147463
1.877	-0.191004	-0.165159	-0.168722	-0.207151	-0.143451	-0.146503
1.878	-0.19084	-0.164622	-0.167671	-0.207111	-0.142833	-0.145979
1.879	-0.190725	-0.163986	-0.166551	-0.207168	-0.142237	-0.145939
1.88	-0.190859	-0.163203	-0.165487	-0.207218	-0.14157	-0.14626
1.881	-0.191305	-0.162248	-0.164481	-0.20729	-0.140887	-0.146751
1.882	-0.191836	-0.161151	-0.163598	-0.207368	-0.140301	-0.147286
1.883	-0.192166	-0.16004	-0.162927	-0.207368	-0.139838	-0.147871
1.884	-0.192253	-0.159064	-0.162418	-0.207218	-0.13945	-0.148614
1.885	-0.192249	-0.15823	-0.16195	-0.20693	-0.13914	-0.149512
1.886	-0.192237	-0.1574	-0.161433	-0.206529	-0.138933	-0.150361
1.887	-0.192154	-0.156508	-0.160773	-0.205944	-0.138786	-0.150902
1.888	-0.191962	-0.155602	-0.159817	-0.205095	-0.138701	-0.150995
1.889	-0.191721	-0.154643	-0.158394	-0.204007	-0.138773	-0.150683
1.89	-0.191575	-0.153478	-0.156403	-0.20283	-0.139024	-0.150164
1.891	-0.191699	-0.152048	-0.153934	-0.201744	-0.139324	-0.149613
1.892	-0.192141	-0.150555	-0.151319	-0.20076	-0.139467	-0.149087
1.893	-0.192773	-0.149373	-0.148986	-0.199717	-0.139323	-0.148636
1.894	-0.193445	-0.148785	-0.147307	-0.198498	-0.138905	-0.148386
1.895	-0.194065	-0.148815	-0.146523	-0.197178	-0.138275	-0.148404
1.896	-0.194481	-0.149343	-0.146656	-0.195897	-0.137476	-0.14855
1.897	-0.194538	-0.150227	-0.147574	-0.194664	-0.136604	-0.148584
1.898	-0.194258	-0.151165	-0.14917	-0.193433	-0.135824	-0.148433
1.899	-0.193766	-0.151786	-0.15136	-0.192299	-0.135229	-0.148189
1.9	-0.193151	-0.152052	-0.153997	-0.19145	-0.134821	-0.147866
1.901	-0.192384	-0.152173	-0.156873	-0.190965	-0.134591	-0.14738
1.902	-0.191417	-0.152259	-0.159671	-0.19079	-0.13454	-0.146786
1.903	-0.190371	-0.152291	-0.162061	-0.190847	-0.134681	-0.146205
1.904	-0.18948	-0.152145	-0.163939	-0.191133	-0.135083	-0.145638
1.905	-0.188915	-0.151646	-0.165375	-0.19176	-0.135809	-0.145061
1.906	-0.188724	-0.150825	-0.166457	-0.192822	-0.136798	-0.144441
1.907	-0.188863	-0.149939	-0.167245	-0.194136	-0.137959	-0.143694
1.908	-0.189245	-0.149218	-0.167691	-0.195287	-0.139176	-0.142772
1.909	-0.189798	-0.148699	-0.167611	-0.195953	-0.140215	-0.141672
1.91	-0.190428	-0.14824	-0.166865	-0.196042	-0.14092	-0.140342
1.911	-0.190985	-0.147692	-0.165606	-0.195632	-0.141353	-0.138755
1.912	-0.191385	-0.147078	-0.164179	-0.194799	-0.141589	-0.137099
1.913	-0.191635	-0.146526	-0.16275	-0.193608	-0.141575	-0.135696
1.914	-0.191798	-0.146072	-0.161273	-0.192267	-0.141327	-0.134705
1.915	-0.191969	-0.145698	-0.159694	-0.191083	-0.140987	-0.134127
1.916	-0.192142	-0.145409	-0.157986	-0.190295	-0.140604	-0.134003
1.917	-0.192183	-0.145171	-0.156117	-0.190015	-0.140136	-0.134442
1.918	-0.191979	-0.144864	-0.154144	-0.190235	-0.139587	-0.135468
1.919	-0.191574	-0.144385	-0.15216	-0.190791	-0.138984	-0.136924
1.92	-0.191101	-0.143781	-0.150151	-0.191474	-0.138321	-0.138556
1.921	-0.190615	-0.143181	-0.148175	-0.192174	-0.137624	-0.14018
1.922	-0.19007	-0.142663	-0.146481	-0.192835	-0.137038	-0.141754
1.923	-0.18941	-0.142256	-0.145321	-0.193359	-0.136678	-0.143294
1.924	-0.188642	-0.14195	-0.144827	-0.193636	-0.136466	-0.144727
1.925	-0.187892	-0.141748	-0.144935	-0.193586	-0.136322	-0.145845
1.926	-0.187283	-0.141703	-0.145398	-0.193247	-0.136306	-0.146482
1.927	-0.186728	-0.141865	-0.146007	-0.192817	-0.136416	-0.146634
1.928	-0.186088	-0.142187	-0.146656	-0.192419	-0.136469	-0.146345
1.929	-0.185429	-0.142506	-0.147245	-0.191965	-0.136273	-0.14561
1.93	-0.184906	-0.142762	-0.147626	-0.191389	-0.135737	-0.144468
1.931	-0.184536	-0.143159	-0.147689	-0.190771	-0.134861	-0.143131
1.932	-0.184183	-0.143965	-0.147494	-0.190191	-0.133778	-0.14176
1.933	-0.183741	-0.145164	-0.147178	-0.189654	-0.132732	-0.1403
1.934	-0.183212	-0.146449	-0.146826	-0.189138	-0.131958	-0.13873
1.935	-0.182665	-0.147482	-0.146515	-0.1886	-0.131538	-0.137203
1.936	-0.182201	-0.148101	-0.146267	-0.188025	-0.131388	-0.13586
1.937	-0.181879	-0.148364	-0.146043	-0.187565	-0.131469	-0.134771
1.938	-0.181661	-0.148396	-0.145854	-0.187428	-0.131763	-0.133985
1.939	-0.181392	-0.148276	-0.145765	-0.187684	-0.132117	-0.133467
1.94	-0.180925	-0.147982	-0.145803	-0.188256	-0.13238	-0.133088
1.941	-0.180304	-0.147381	-0.145929	-0.188993	-0.132538	-0.13272
1.942	-0.179676	-0.146399	-0.146126	-0.18977	-0.132634	-0.132273
1.943	-0.179143	-0.14518	-0.14643	-0.19045	-0.132595	-0.131745
1.944	-0.178795	-0.143974	-0.146812	-0.190861	-0.132284	-0.131267
1.945	-0.178738	-0.142926	-0.147109	-0.190965	-0.131679	-0.130956
1.946	-0.179014	-0.142076	-0.147201	-0.190842	-0.130889	-0.130804
1.947	-0.179493	-0.141533	-0.147131	-0.190577	-0.130099	-0.130774
1.948	-0.179929	-0.141475	-0.147012	-0.190199	-0.129476	-0.130856
1.949	-0.18024	-0.141972	-0.146875	-0.189662	-0.129094	-0.130976
1.95	-0.180576	-0.142833	-0.146615	-0.188925	-0.128982	-0.130992
1.951	-0.181043	-0.14365	-0.146057	-0.187968	-0.129155	-0.1308
1.952	-0.181553	-0.144125	-0.145193	-0.186761	-0.129644	-0.130441
1.953	-0.181954	-0.144237	-0.144332	-0.185295	-0.130386	-0.13004
1.954	-0.182131	-0.144056	-0.143856	-0.183661	-0.131111	-0.129636
1.955	-0.182057	-0.143656	-0.143899	-0.182047	-0.131522	-0.129218
1.956	-0.181801	-0.143141	-0.144291	-0.180667	-0.131467	-0.128825
1.957	-0.181442	-0.142632	-0.144712	-0.179696	-0.130951	-0.128427
1.958	-0.181028	-0.142202	-0.144949	-0.17917	-0.130162	-0.127858
1.959	-0.180523	-0.141758	-0.144933	-0.178978	-0.129392	-0.12699
1.96	-0.179857	-0.141085	-0.14447	-0.179049	-0.128793	-0.125901
1.961	-0.179143	-0.140086	-0.143299	-0.179481	-0.128314	-0.124809
1.962	-0.178609	-0.138915	-0.141478	-0.18035	-0.127865	-0.123997
1.963	-0.178297	-0.137825	-0.139499	-0.181571	-0.127364	-0.123655
1.964	-0.178069	-0.136882	-0.13798	-0.183018	-0.126666	-0.123673
1.965	-0.177775	-0.13595	-0.137233	-0.184529	-0.125635	-0.123867
1.966	-0.177251	-0.1349	-0.137242	-0.185786	-0.124293	-0.124191
1.967	-0.176328	-0.133772	-0.13793	-0.186444	-0.122783	-0.124598
1.968	-0.17488	-0.13273	-0.139191	-0.18636	-0.121235	-0.125065
1.969	-0.172875	-0.131863	-0.140758	-0.185595	-0.11968	-0.125695
1.97	-0.170476	-0.131141	-0.142298	-0.18443	-0.118054	-0.126574
1.971	-0.168019	-0.130509	-0.143651	-0.183281	-0.116391	-0.127629
1.972	-0.165821	-0.129997	-0.144762	-0.182411	-0.114892	-0.12866
1.973	-0.16403	-0.129706	-0.145495	-0.181793	-0.113795	-0.129421
1.974	-0.162667	-0.129702	-0.14566	-0.18135	-0.113235	-0.12976
1.975	-0.161788	-0.129949	-0.145142	-0.181156	-0.113157	-0.129718
1.976	-0.161476	-0.130341	-0.14399	-0.181285	-0.113414	-0.129443
1.977	-0.161711	-0.130839	-0.142423	-0.181655	-0.113961	-0.129052
1.978	-0.162311	-0.131458	-0.140759	-0.18213	-0.114901	-0.128659
1.979	-0.162997	-0.132133	-0.139305	-0.182654	-0.116316	-0.128465
1.98	-0.163568	-0.132789	-0.138256	-0.183254	-0.118046	-0.128643
1.981	-0.163978	-0.133393	-0.137684	-0.18393	-0.119764	-0.129208
1.982	-0.16431	-0.133884	-0.137548	-0.184565	-0.121267	-0.129984
1.983	-0.164694	-0.134178	-0.137638	-0.185034	-0.122483	-0.130624
1.984	-0.165104	-0.134262	-0.137664	-0.1853	-0.123368	-0.130849
1.985	-0.165414	-0.13415	-0.137481	-0.18535	-0.123936	-0.130662
1.986	-0.165642	-0.133872	-0.137192	-0.185141	-0.124257	-0.130186
1.987	-0.165927	-0.133509	-0.137005	-0.184709	-0.124388	-0.129515
1.988	-0.166333	-0.133098	-0.136978	-0.184255	-0.124323	-0.128723
1.989	-0.166706	-0.132675	-0.137067	-0.183985	-0.124029	-0.127798
1.99	-0.166802	-0.132367	-0.137319	-0.18399	-0.123525	-0.126655
1.991	-0.166598	-0.132302	-0.137777	-0.184301	-0.122878	-0.125354
1.992	-0.16634	-0.132398	-0.138374	-0.184886	-0.122203	-0.124084
1.993	-0.166251	-0.132365	-0.138991	-0.185575	-0.121595	-0.122949
1.994	-0.166353	-0.131998	-0.139517	-0.186129	-0.121047	-0.122042
1.995	-0.166584	-0.131414	-0.139872	-0.186423	-0.120501	-0.12151
1.996	-0.167012	-0.130873	-0.14005	-0.186495	-0.119946	-0.121379
1.997	-0.167793	-0.13043	-0.1401	-0.186454	-0.119448	-0.121525
1.998	-0.168958	-0.129968	-0.140006	-0.186363	-0.119111	-0.12181
[truncated: 1,001 more rows]

## Sheet: WT_SEC_profile
volume (mL)	absorbance (mAU)
0	2.43698
0.000499	17.7974
0.000998	17.8429
0.001497	17.8932
0.001996	17.9363
0.002496	17.9802
0.002995	18.027
0.003494	18.0721
0.003993	18.1199
0.004492	18.1688
0.004991	18.2184
0.00549	18.278
0.005989	18.3392
0.006489	18.4186
0.006988	18.5042
0.007487	18.611
0.007986	18.7374
0.008485	18.879
0.008984	19.0423
0.009483	19.2394
0.009982	19.4743
0.010482	19.6954
0.010981	19.9621
0.01148	20.2261
0.011979	20.496
0.012478	20.7714
0.012977	21.0653
0.013476	21.3459
0.013975	21.6256
0.014474	21.9019
0.014974	22.1832
0.015473	22.4394
0.015972	22.6674
0.016471	22.9098
0.01697	23.141
0.017469	23.3588
0.017968	23.555
0.018467	23.7426
0.018967	23.9265
0.019466	24.0918
0.019965	24.2459
0.020464	24.3689
0.020963	24.4627
0.021462	24.5439
0.021961	24.6123
0.02246	24.681
0.02296	24.748
0.023459	24.8202
0.023958	24.8931
0.024457	25.0233
0.024956	25.2997
0.025455	25.6559
0.025954	25.8381
0.026453	25.9808
0.026953	26.1301
0.027452	26.2752
0.027951	26.4213
0.02845	26.5675
0.028949	26.6978
0.029448	26.8267
0.029947	26.9413
0.030446	27.0379
0.030945	27.1192
0.031445	27.1825
0.031944	27.2259
0.032443	27.2537
0.032942	27.2656
0.033441	27.2675
0.03394	27.2665
0.034439	27.2663
0.034938	27.2679
0.035438	27.2717
0.035937	27.2792
0.036436	27.2944
0.036935	27.3181
0.037434	27.3515
0.037933	27.3951
0.038432	27.4506
0.038931	27.5194
0.039431	27.6006
0.03993	27.6954
0.040429	27.8002
0.040928	27.9198
0.041427	28.0508
0.041926	28.186
0.042425	28.3307
0.042924	28.4842
0.043423	28.6404
0.043923	28.8015
0.044422	28.9678
0.044921	29.1383
0.04542	29.3137
0.045919	29.4855
0.046418	29.6593
0.046917	29.8197
0.047416	29.9792
0.047916	30.1359
0.048415	30.2828
0.048914	30.4252
0.049413	30.5542
0.049912	30.6772
0.050411	30.7885
0.05091	30.8924
0.051409	30.9888
0.051909	31.0792
0.052408	31.1619
0.052907	31.2353
0.053406	31.3006
0.053905	31.3588
0.054404	29.3555
0.054903	23.4698
0.055402	19.8748
0.055901	19.8439
0.056401	19.8115
0.0569	19.7801
0.057399	19.7484
0.057898	19.7171
0.058397	19.6872
0.058896	19.6548
0.059395	19.6218
0.059894	19.5901
0.060394	19.5555
0.060893	19.5232
0.061392	19.488
0.061891	19.4546
0.06239	19.4191
0.062889	19.3829
0.063388	19.346
0.063887	19.3078
0.064387	19.2686
0.064886	19.2284
0.065385	19.186
0.065884	19.1416
0.066383	19.0947
0.066882	19.0462
0.067381	18.9963
0.06788	18.9431
0.068379	18.8866
0.068879	18.8288
0.069378	18.77
0.069877	18.707
0.070376	18.64
0.070875	18.5719
0.071374	18.5016
0.071873	18.4289
0.072372	18.353
0.072872	18.2736
0.073371	18.1927
0.07387	18.1066
0.074369	18.0195
0.074868	17.9301
0.075367	17.8395
0.075866	17.7455
0.076365	17.6486
0.076865	17.5489
0.077364	17.4497
0.077863	17.3486
0.078362	17.2434
0.078861	17.1384
0.07936	17.031
0.079859	16.9238
0.080358	16.8144
0.080858	16.7039
0.081357	16.5914
0.081856	16.4806
0.082355	16.3642
0.082854	16.2505
0.083353	16.1358
0.083852	16.0186
0.084351	15.899
0.08485	15.7828
0.08535	15.6674
0.085849	15.553
0.086348	15.4391
0.086847	15.3268
0.087346	15.2158
0.087845	15.1031
0.088344	14.9949
0.088843	14.8905
0.089343	14.7877
0.089842	14.6862
0.090341	14.5872
0.09084	14.492
0.091339	14.4009
0.091838	14.3134
0.092337	14.2313
0.092836	14.1508
0.093336	14.0748
0.093835	14.002
0.094334	13.9322
0.094833	13.8665
0.095332	13.8085
0.095831	13.7525
0.09633	13.6995
0.096829	13.6514
0.097328	13.6069
0.097828	13.5671
0.098327	13.5296
0.098826	13.4954
0.099325	13.4646
0.099824	13.4362
0.100323	13.4115
0.100822	13.3896
0.101321	13.3693
0.101821	13.3508
0.10232	13.3351
0.102819	13.3195
0.103318	13.3052
0.103817	13.2927
0.104316	13.2819
0.104815	13.2716
0.105314	13.2616
0.105814	13.2523
0.106313	13.2436
0.106812	13.2352
0.107311	13.2271
0.10781	13.2197
0.108309	13.2111
0.108808	13.2044
0.109307	13.1963
0.109806	13.1873
0.110306	13.1777
0.110805	13.1659
0.111304	13.1532
0.111803	13.1391
0.112302	13.1232
0.112801	13.1054
0.1133	13.084
0.113799	13.061
0.114299	13.0374
0.114798	13.0111
0.115297	12.9828
0.115796	12.952
0.116295	12.9197
0.116794	12.8845
0.117293	12.8468
0.117792	12.8082
0.118292	12.7647
0.118791	12.7203
0.11929	12.6748
0.119789	12.6256
0.120288	12.5748
0.120787	12.5214
0.121286	12.4682
0.121785	12.4113
0.122284	12.3533
0.122784	12.2959
0.123283	12.2347
0.123782	12.1718
0.124281	12.1078
0.12478	12.0436
0.125279	11.979
0.125778	11.9131
0.126277	11.8433
0.126777	11.776
0.127276	11.7095
0.127775	11.6402
0.128274	11.5721
0.128773	11.5022
0.129272	11.4355
0.129771	11.3666
0.13027	11.3002
0.13077	11.232
0.131269	11.1623
0.131768	11.0933
0.132267	11.0262
0.132766	10.959
0.133265	10.8958
0.133764	10.8294
0.134263	10.7599
0.134763	10.6934
0.135262	10.6289
0.135761	10.5654
0.13626	10.5031
0.136759	10.4406
0.137258	10.3754
0.137757	10.3138
0.138256	10.2537
0.138755	10.1918
0.139255	10.1331
0.139754	10.0724
0.140253	10.0133
0.140752	9.95327
0.141251	9.89381
0.14175	9.83734
0.142249	9.77921
0.142748	9.72017
0.143248	9.66238
0.143747	9.60807
0.144246	9.55275
0.144745	9.49685
0.145244	9.44208
0.145743	9.38694
0.146242	9.33258
0.146741	9.27923
0.147241	9.22609
0.14774	9.17317
0.148239	9.12147
0.148738	9.07045
0.149237	9.01707
0.149736	8.96654
0.150235	8.91732
0.150734	8.86893
0.151233	8.81829
0.151733	8.77045
0.152232	8.72356
0.152731	8.67474
0.15323	8.62995
0.153729	8.58555
0.154228	8.53896
0.154727	8.49406
0.155226	8.44807
0.155726	8.40515
0.156225	8.36172
0.156724	8.31953
0.157223	8.27508
0.157722	8.23123
0.158221	8.19083
0.15872	8.14938
0.159219	8.10838
0.159719	8.06994
0.160218	8.02782
0.160717	7.98631
0.161216	7.94389
0.161715	7.90631
0.162214	7.86605
0.162713	7.82531
0.163212	7.78562
0.163711	7.74582
0.164211	7.70528
0.16471	7.66427
0.165209	7.62601
0.165708	7.58703
0.166207	7.54875
0.166706	7.51086
0.167205	7.47294
0.167704	7.43671
0.168204	7.40032
0.168703	7.36519
0.169202	7.32957
0.169701	7.29497
0.1702	7.25985
0.170699	7.22526
0.171198	7.19208
0.171697	7.15598
0.172197	7.1226
0.172696	7.08908
0.173195	7.05639
0.173694	7.0243
0.174193	6.99073
0.174692	6.96004
0.175191	6.92859
0.17569	6.89722
0.176189	6.86468
0.176689	6.83444
0.177188	6.80412
0.177687	6.77168
0.178186	6.74123
0.178685	6.71094
0.179184	6.6785
0.179683	6.64904
0.180182	6.61719
0.180682	6.58688
0.181181	6.55412
0.18168	6.52532
0.182179	6.4955
0.182678	6.46389
0.183177	6.43559
0.183676	6.40425
0.184175	6.37429
0.184675	6.3438
0.185174	6.31611
0.185673	6.28662
0.186172	6.26079
0.186671	6.23168
0.18717	6.20419
0.187669	6.17882
0.188168	6.15185
0.188668	6.12658
0.189167	6.10123
0.189666	6.07909
0.190165	6.05437
0.190664	6.03023
0.191163	6.00662
0.191662	5.98186
0.192161	5.95859
0.19266	5.93558
0.19316	5.91119
0.193659	5.88875
0.194158	5.86402
0.194657	5.8397
0.195156	5.81801
0.195655	5.79377
0.196154	5.76972
0.196653	5.74668
0.197153	5.72425
0.197652	5.70218
0.198151	5.6798
0.19865	5.65763
0.199149	5.6341
0.199648	5.61029
0.200147	5.58793
0.200646	5.56728
0.201146	5.54567
0.201645	5.52461
0.202144	5.50533
0.202643	5.48547
0.203142	5.46491
0.203641	5.44495
0.20414	5.42633
0.204639	5.40762
0.205138	5.38839
0.205638	5.36991
0.206137	5.35322
0.206636	5.33485
0.207135	5.31644
0.207634	5.29885
0.208133	5.28117
0.208632	5.26517
0.209131	5.24862
0.209631	5.2318
0.21013	5.21538
0.210629	5.19859
0.211128	5.18163
0.211627	5.1662
0.212126	5.14889
0.212625	5.13135
0.213124	5.11423
0.213624	5.09669
0.214123	5.07836
0.214622	5.06053
0.215121	5.04339
0.21562	5.02441
0.216119	5.00679
0.216618	4.98994
0.217117	4.9734
0.217616	4.95589
0.218116	4.93852
0.218615	4.92056
0.219114	4.90388
0.219613	4.88813
0.220112	4.87119
0.220611	4.85706
0.22111	4.8405
0.221609	4.82458
0.222109	4.80839
0.222608	4.79158
0.223107	4.77597
0.223606	4.75936
0.224105	4.74397
0.224604	4.72945
0.225103	4.71513
0.225602	4.69848
0.226102	4.68245
0.226601	4.66816
0.2271	4.65261
0.227599	4.63629
0.228098	4.6209
0.228597	4.60624
0.229096	4.59302
0.229595	4.57719
0.230094	4.56239
0.230594	4.5468
0.231093	4.53069
0.231592	4.51477
0.232091	4.50035
0.23259	4.48619
0.233089	4.47025
0.233588	4.4544
0.234087	4.44015
0.234587	4.42579
0.235086	4.412
0.235585	4.39912
0.236084	4.38542
0.236583	4.37314
0.237082	4.36019
0.237581	4.34789
0.23808	4.33545
0.23858	4.32338
0.239079	4.31138
0.239578	4.29849
0.240077	4.28611
0.240576	4.2744
0.241075	4.26261
0.241574	4.25063
0.242073	4.23824
0.242573	4.22704
0.243072	4.21563
0.243571	4.20378
0.24407	4.19211
0.244569	4.17995
0.245068	4.16871
0.245567	4.15746
0.246066	4.14534
0.246565	4.13502
0.247065	4.12526
0.247564	4.11388
0.248063	4.10381
0.248562	4.09394
0.249061	4.08243
0.24956	4.07094
0.250059	4.05968
0.250558	4.04957
0.251058	4.03966
0.251557	4.02821
0.252056	4.01747
0.252555	4.0073
0.253054	3.9969
0.253553	3.98635
0.254052	3.97481
0.254551	3.9645
0.255051	3.95428
0.25555	3.94404
0.256049	3.93437
0.256548	3.92476
0.257047	3.916
0.257546	3.9072
0.258045	3.89837
0.258544	3.8899
0.259043	3.88107
0.259543	3.87221
0.260042	3.86213
0.260541	3.85232
0.26104	3.84306
0.261539	3.83309
0.262038	3.82333
0.262537	3.8143
0.263036	3.80548
0.263536	3.79645
0.264035	3.78762
0.264534	3.7793
0.265033	3.7707
0.265532	3.76372
0.266031	3.7563
0.26653	3.74841
0.267029	3.74033
0.267529	3.73212
0.268028	3.72383
0.268527	3.71599
0.269026	3.70886
0.269525	3.70172
0.270024	3.69408
0.270523	3.68674
0.271022	3.67924
0.271521	3.67102
0.272021	3.66295
0.27252	3.65522
0.273019	3.6471
0.273518	3.63925
0.274017	3.63151
0.274516	3.62393
0.275015	3.61693
0.275514	3.60918
0.276014	3.60117
0.276513	3.59324
0.277012	3.58515
0.277511	3.57773
0.27801	3.57063
0.278509	3.56386
0.279008	3.55649
0.279507	3.54883
0.280007	3.54153
0.280506	3.53508
0.281005	3.5279
0.281504	3.51978
0.282003	3.51188
0.282502	3.50453
0.283001	3.49733
0.2835	3.48977
0.284	3.48201
0.284499	3.47493
0.284998	3.46832
0.285497	3.46085
0.285996	3.45372
0.286495	3.44688
0.286994	3.43958
0.287493	3.43254
0.287992	3.42575
0.288492	3.41884
0.288991	3.41195
0.28949	3.40533
0.289989	3.39796
0.290488	3.39025
0.290987	3.38274
0.291486	3.3757
0.291985	3.36921
0.292485	3.3634
0.292984	3.35762
0.293483	3.35178
0.293982	3.34519
0.294481	3.33918
0.29498	3.3327
0.295479	3.32669
0.295978	3.3204
0.296477	3.31496
0.296977	3.30926
0.297476	3.30384
0.297975	3.29806
0.298474	3.29224
0.298973	3.2879
0.299472	3.28309
0.299971	3.27674
0.30047	3.27219
0.30097	3.26804
0.301469	3.26394
0.301968	3.25927
0.302467	3.25411
0.302966	3.24868
0.303465	3.245
0.303964	3.24063
0.304463	3.23646
0.304963	3.23245
0.305462	3.22848
0.305961	3.22549
0.30646	3.22173
0.306959	3.21738
0.307458	3.21278
0.307957	3.20789
0.308456	3.2042
0.308956	3.20056
0.309455	3.19604
0.309954	3.19256
0.310453	3.18972
0.310952	3.18589
0.311451	3.18295
0.31195	3.17972
0.312449	3.17653
0.312948	3.17248
0.313448	3.1696
0.313947	3.16615
0.314446	3.16156
0.314945	3.15835
0.315444	3.15374
0.315943	3.15105
0.316442	3.14833
0.316941	3.14505
0.317441	3.14051
0.31794	3.13663
0.318439	3.13292
0.318938	3.13008
0.319437	3.12704
0.319936	3.12446
0.320435	3.1219
0.320934	3.12047
0.321434	3.11756
0.321933	3.11408
0.322432	3.10982
0.322931	3.10742
0.32343	3.10604
0.323929	3.10325
0.324428	3.10034
0.324927	3.09793
0.325426	3.09526
0.325926	3.09259
0.326425	3.0905
0.326924	3.08791
0.327423	3.08616
0.327922	3.08326
0.328421	3.08101
0.32892	3.07934
0.329419	3.07632
0.329919	3.07379
0.330418	3.07092
0.330917	3.06764
0.331416	3.06453
0.331915	3.062
0.332414	3.05983
0.332913	3.05723
0.333412	3.05469
0.333912	3.05194
0.334411	3.0494
0.33491	3.04698
0.335409	3.04417
0.335908	3.04182
0.336407	3.03985
0.336906	3.03717
0.337405	3.03448
0.337905	3.03189
0.338404	3.03004
0.338903	3.02674
0.339402	3.02429
0.339901	3.02287
0.3404	3.02098
0.340899	3.02024
0.341398	3.01736
0.341897	3.01448
0.342397	3.01169
0.342896	3.01076
0.343395	3.00873
0.343894	3.00697
0.344393	3.00439
0.344892	3.00224
0.345391	3.00069
0.34589	2.9985
0.34639	2.99566
0.346889	2.99299
0.347388	2.99113
0.347887	2.98997
0.348386	2.98846
0.348885	2.98612
0.349384	2.98373
0.349883	2.9823
0.350383	2.98002
0.350882	2.97863
0.351381	2.97547
0.35188	2.97352
0.352379	2.97209
0.352878	2.97017
0.353377	2.96853
0.353876	2.9681
0.354375	2.96657
0.354875	2.96373
0.355374	2.96224
0.355873	2.96039
0.356372	2.95819
0.356871	2.95678
0.35737	2.95459
0.357869	2.95257
0.358368	2.95114
0.358868	2.9497
0.359367	2.94832
0.359866	2.9466
0.360365	2.94491
0.360864	2.9435
0.361363	2.94244
0.361862	2.94069
0.362361	2.93916
0.362861	2.93746
0.36336	2.93582
0.363859	2.9339
0.364358	2.93261
0.364857	2.93124
0.365356	2.92979
0.365855	2.92804
0.366354	2.92592
0.366853	2.92481
0.367353	2.92374
0.367852	2.92238
0.368351	2.92119
0.36885	2.92073
0.369349	2.92041
0.369848	2.91945
0.370347	2.91855
0.370846	2.91696
0.371346	2.91601
0.371845	2.91588
0.372344	2.91479
0.372843	2.91362
0.373342	2.91284
0.373841	2.913
0.37434	2.91273
0.374839	2.91074
0.375339	2.90915
0.375838	2.90876
0.376337	2.90824
0.376836	2.90816
0.377335	2.90752
0.377834	2.90692
0.378333	2.90622
0.378832	2.90457
0.379331	2.90311
0.379831	2.90249
0.38033	2.90197
0.380829	2.90117
0.381328	2.90059
0.381827	2.89983
0.382326	2.89934
0.382825	2.89932
0.383324	2.89864
0.383824	2.89733
0.384323	2.89631
0.384822	2.89522
0.385321	2.89457
0.38582	2.89404
0.386319	2.89249
0.386818	2.89127
0.387317	2.89038
0.387817	2.88915
0.388316	2.88885
0.388815	2.88768
0.389314	2.88597
0.389813	2.88519
0.390312	2.8851
0.390811	2.88359
0.39131	2.8828
0.391809	2.88116
0.392309	2.88006
0.392808	2.87919
0.393307	2.87783
0.393806	2.87716
0.394305	2.87664
0.394804	2.87582
0.395303	2.87525
0.395802	2.87385
0.396302	2.87266
0.396801	2.87126
0.3973	2.87095
0.397799	2.87108
0.398298	2.87056
0.398797	2.86908
0.399296	2.86841
0.399795	2.86885
0.400295	2.86856
0.400794	2.86757
0.401293	2.8665
0.401792	2.86531
0.402291	2.86364
0.40279	2.86281
0.403289	2.86227
0.403788	2.8623
0.404288	2.86153
0.404787	2.85985
0.405286	2.85923
0.405785	2.85911
0.406284	2.85873
0.406783	2.85833
0.407282	2.85726
0.407781	2.85648
0.40828	2.85554
0.40878	2.85495
0.409279	2.85403
0.409778	2.8527
0.410277	2.85152
0.410776	2.85038
0.411275	2.84933
0.411774	2.84781
0.412273	2.8461
0.412773	2.84429
0.413272	2.84224
0.413771	2.84084
0.41427	2.84014
0.414769	2.83849
0.415268	2.83716
0.415767	2.83717
0.416266	2.83671
0.416766	2.83636
0.417265	2.83594
0.417764	2.83553
0.418263	2.83516
0.418762	2.83391
0.419261	2.83149
0.41976	2.83057
0.420259	2.82954
0.420758	2.82883
0.421258	2.82805
0.421757	2.82502
0.422256	2.82041
0.422755	2.81534
0.423254	2.81401
0.423753	2.81286
0.424252	2.81131
0.424751	2.80975
0.425251	2.80771
0.42575	2.80634
0.426249	2.80509
0.426748	2.80397
0.427247	2.80301
0.427746	2.80169
0.428245	2.80057
0.428744	2.79911
0.429244	2.79784
0.429743	2.79763
0.430242	2.79719
0.430741	2.79651
0.43124	2.7956
0.431739	2.79507
0.432238	2.79497
0.432737	2.79501
0.433237	2.79494
0.433736	2.79397
0.434235	2.79303
0.434734	2.7939
0.435233	2.7948
0.435732	2.79499
0.436231	2.79548
0.43673	2.79542
0.437229	2.79513
0.437729	2.79406
0.438228	2.79283
0.438727	2.7924
0.439226	2.79174
0.439725	2.79035
0.440224	2.78881
0.440723	2.78717
0.441222	2.7859
0.441722	2.78518
0.442221	2.78383
0.44272	2.78249
0.443219	2.78152
0.443718	2.78103
0.444217	2.78067
0.444716	2.78011
0.445215	2.77911
0.445715	2.77795
0.446214	2.77706
0.446713	2.77656
0.447212	2.77617
0.447711	2.77512
0.44821	2.77409
0.448709	2.7736
0.449208	2.77396
0.449707	2.77427
0.450207	2.77351
0.450706	2.77208
0.451205	2.77141
0.451704	2.77122
0.452203	2.7709
0.452702	2.77023
0.453201	2.76948
0.4537	2.76943
0.4542	2.76958
0.454699	2.76891
0.455198	2.76817
0.455697	2.76821
0.456196	2.76779
0.456695	2.76718
0.457194	2.76777
0.457693	2.76751
0.458193	2.7664
0.458692	2.76636
0.459191	2.76629
0.45969	2.76508
0.460189	2.76503
0.460688	2.76543
0.461187	2.76491
0.461686	2.76452
0.462185	2.76465
0.462685	2.7656
0.463184	2.76538
0.463683	2.76452
0.464182	2.76473
0.464681	2.7654
0.46518	2.76581
0.465679	2.76587
0.466178	2.76591
0.466678	2.76496
0.467177	2.76421
0.467676	2.76446
0.468175	2.76434
0.468674	2.76389
0.469173	2.7637
0.469672	2.7633
0.470171	2.76262
0.470671	2.76216
0.47117	2.76242
0.471669	2.76204
0.472168	2.76201
0.472667	2.76235
0.473166	2.76269
0.473665	2.76286
0.474164	2.76202
0.474663	2.76122
0.475163	2.76148
0.475662	2.76138
0.476161	2.76046
0.47666	2.75953
0.477159	2.75983
0.477658	2.76006
0.478157	2.75942
0.478656	2.75879
0.479156	2.75737
0.479655	2.7563
0.480154	2.75505
0.480653	2.75386
0.481152	2.75309
0.481651	2.75244
0.48215	2.75107
0.482649	2.75034
0.483149	2.75028
0.483648	2.75003
0.484147	2.74997
0.484646	2.75011
0.485145	2.74876
0.485644	2.74714
0.486143	2.746
0.486642	2.74552
0.487141	2.74472
0.487641	2.74357
0.48814	2.74303
0.488639	2.74274
0.489138	2.74067
0.489637	2.73898
0.490136	2.73787
0.490635	2.73766
0.491134	2.73775
0.491634	2.73803
0.492133	2.73873
0.492632	2.73827
0.493131	2.73765
0.49363	2.73728
0.494129	2.73716
0.494628	2.73642
0.495127	2.73575
0.495627	2.73606
0.496126	2.73569
0.496625	2.73569
0.497124	2.73465
0.497623	2.73478
0.498122	2.73433
0.498621	2.73353
0.49912	2.73321
0.49962	2.7333
0.500119	2.73251
0.500618	2.73295
0.501117	2.73304
0.501616	2.73296
0.502115	2.73223
0.502614	2.73157
0.503113	2.73141
0.503612	2.73119
0.504112	2.73136
0.504611	2.7312
0.50511	2.73187
0.505609	2.7313
0.506108	2.73135
0.506607	2.73041
0.507106	2.73033
0.507605	2.73
0.508105	2.72962
0.508604	2.72915
0.509103	2.72786
0.509602	2.72639
0.510101	2.72627
0.5106	2.72653
0.511099	2.72766
0.511598	2.72835
0.512098	2.72932
0.512597	2.72947
0.513096	2.72947
0.513595	2.72933
0.514094	2.73137
0.514593	2.73265
0.515092	2.73277
0.515591	2.73248
0.516091	2.73294
0.51659	2.73401
0.517089	2.73464
0.517588	2.73564
0.518087	2.73691
0.518586	2.73782
0.519085	2.73946
0.519584	2.74185
0.520083	2.74413
0.520583	2.74427
0.521082	2.74572
0.521581	2.74636
0.52208	2.74714
0.522579	2.74662
0.523078	2.74771
0.523577	2.74933
0.524076	2.74956
0.524576	2.74993
0.525075	2.75041
0.525574	2.75004
0.526073	2.74952
0.526572	2.74938
0.527071	2.74888
0.52757	2.74879
0.528069	2.749
0.528569	2.74968
0.529068	2.75121
0.529567	2.75072
0.530066	2.75065
0.530565	2.75129
0.531064	2.75197
0.531563	2.75322
0.532062	2.75255
0.532561	2.75237
0.533061	2.75295
0.53356	2.75399
0.534059	2.75494
0.534558	2.75594
0.535057	2.7557
0.535556	2.7555
0.536055	2.75493
0.536554	2.75399
0.537054	2.75337
0.537553	2.75388
0.538052	2.75412
0.538551	2.7543
0.53905	2.75373
0.539549	2.75254
0.540048	2.75252
0.540547	2.75186
0.541047	2.7506
0.541546	2.74955
0.542045	2.74826
0.542544	2.74745
0.543043	2.74689
0.543542	2.74574
0.544041	2.7441
0.54454	2.74294
0.545039	2.74195
0.545539	2.74109
0.546038	2.74046
0.546537	2.74023
0.547036	2.74017
0.547535	2.73964
0.548034	2.73837
0.548533	2.73695
0.549032	2.73664
0.549532	2.736
0.550031	2.73578
0.55053	2.73612
0.551029	2.73618
0.551528	2.73687
0.552027	2.73727
0.552526	2.73686
0.553025	2.73631
0.553524	2.73542
0.554024	2.73474
0.554523	2.7357
0.555022	2.73621
0.555521	2.73638
0.55602	2.73608
0.556519	2.73555
0.557018	2.73604
0.557517	2.73658
0.558017	2.73619
0.558516	2.73592
0.559015	2.73515
0.559514	2.73477
0.560013	2.73529
0.560512	2.73522
0.561011	2.73506
0.56151	2.73492
0.56201	2.73416
0.562509	2.73373
0.563008	2.73363
0.563507	2.73318
0.564006	2.73304
0.564505	2.73216
0.565004	2.732
0.565503	2.73245
0.566003	2.73185
0.566502	2.73136
0.567001	2.73113
0.5675	2.73074
0.567999	2.73063
0.568498	2.73109
0.568997	2.73097
0.569496	2.73098
0.569995	2.73136
0.570495	2.7311
0.570994	2.7301
0.571493	2.72914
0.571992	2.72988
0.572491	2.73031
0.57299	2.73078
0.573489	2.73104
0.573988	2.73181
0.574488	2.73377
0.574987	2.73467
0.575486	2.73581
0.575985	2.73607
0.576484	2.7362
0.576983	2.73655
0.577482	2.73744
0.577981	2.73794
0.578481	2.73929
0.57898	2.73979
0.579479	2.73969
0.579978	2.73926
0.580477	2.73945
0.580976	2.73996
0.581475	2.74042
0.581974	2.73962
0.582474	2.7393
0.582973	2.73932
0.583472	2.73948
0.583971	2.74092
0.58447	2.74092
0.584969	2.74105
0.585468	2.74189
0.585967	2.74229
0.586466	2.74291
0.586966	2.74308
0.587465	2.74306
0.587964	2.74266
0.588463	2.74198
0.588962	2.74226
0.589461	2.74443
0.58996	2.74316
0.590459	2.74281
0.590959	2.74394
0.591458	2.74456
0.591957	2.74336
0.592456	2.74308
0.592955	2.74147
0.593454	2.74004
0.593953	2.74001
0.594452	2.73933
0.594952	2.73888
0.595451	2.73944
0.59595	2.74073
0.596449	2.74036
0.596948	2.73903
0.597447	2.73806
0.597946	2.73833
0.598445	2.7374
0.598944	2.73542
0.599444	2.73403
0.599943	2.73321
0.600442	2.73191
0.600941	2.73167
0.60144	2.73139
0.601939	2.73046
0.602438	2.72951
0.602937	2.72913
0.603437	2.72784
0.603936	2.72672
0.604435	2.72611
0.604934	2.72645
0.605433	2.72578
0.605932	2.72622
0.606431	2.72666
0.60693	2.72643
0.60743	2.72487
0.607929	2.72356
0.608428	2.7232
0.608927	2.72326
0.609426	2.7231
0.609925	2.72204
0.610424	2.72133
0.610923	2.72164
0.611422	2.72139
0.611922	2.72148
0.612421	2.72168
0.61292	2.72181
0.613419	2.72187
0.613918	2.72148
0.614417	2.72126
0.614916	2.72092
0.615415	2.72147
0.615915	2.72201
0.616414	2.72134
0.616913	2.72277
0.617412	2.72355
0.617911	2.7241
0.61841	2.72419
0.618909	2.72384
0.619408	2.72357
0.619907	2.72377
0.620407	2.72386
0.620906	2.72348
0.621405	2.72344
0.621904	2.72298
0.622403	2.72348
0.622902	2.72416
0.623401	2.72469
0.6239	2.72549
0.6244	2.72651
0.624899	2.7262
0.625398	2.72659
0.625897	2.72777
0.626396	2.72778
0.626895	2.7281
0.627394	2.72869
0.627893	2.73041
0.628393	2.731
0.628892	2.73097
0.629391	2.73148
0.62989	2.73169
0.630389	2.73159
0.630888	2.73161
0.631387	2.73119
0.631886	2.73041
0.632386	2.72966
0.632885	2.72956
0.633384	2.73053
0.633883	2.73101
0.634382	2.73087
0.634881	2.73023
0.63538	2.72978
0.635879	2.72966
0.636378	2.72959
0.636878	2.72858
0.637377	2.72826
0.637876	2.72824
0.638375	2.72706
0.638874	2.72746
0.639373	2.7288
0.639872	2.7296
0.640371	2.72927
0.640871	2.72979
0.64137	2.72949
0.641869	2.72892
0.642368	2.72875
0.642867	2.72712
0.643366	2.72634
0.643865	2.72498
0.644364	2.72511
0.644864	2.72529
0.645363	2.72484
0.645862	2.72389
0.646361	2.72318
0.64686	2.72154
0.647359	2.72156
0.647858	2.72209
0.648357	2.72208
0.648857	2.72139
0.649356	2.72039
0.649855	2.71977
0.650354	2.71972
0.650853	2.71882
0.651352	2.71766
0.651851	2.717
0.65235	2.71617
0.652849	2.71569
0.653349	2.71486
0.653848	2.71351
0.654347	2.71308
0.654846	2.71278
0.655345	2.71242
0.655844	2.71217
0.656343	2.71159
0.656842	2.71124
0.657342	2.71071
0.657841	2.71076
0.65834	2.71117
0.658839	2.71122
0.659338	2.71084
0.659837	2.71048
0.660336	2.71115
0.660835	2.71156
0.661335	2.71176
0.661834	2.71248
0.662333	2.71298
0.662832	2.71205
0.663331	2.71158
0.66383	2.71084
0.664329	2.70931
0.664828	2.70844
0.665327	2.70826
0.665827	2.70849
0.666326	2.7088
0.666825	2.70822
0.667324	2.70767
0.667823	2.70782
0.668322	2.7084
0.668821	2.7091
0.66932	2.70939
0.66982	2.70893
0.670319	2.70849
0.670818	2.70857
0.671317	2.7089
0.671816	2.70992
0.672315	2.71037
0.672814	2.70996
0.673313	2.70985
0.673813	2.71001
0.674312	2.71048
0.674811	2.71044
0.67531	2.70949
0.675809	2.7093
0.676308	2.7099
0.676807	2.71029
0.677306	2.7103
0.677805	2.7102
0.678305	2.70994
0.678804	2.70996
0.679303	2.71036
0.679802	2.7102
0.680301	2.70962
0.6808	2.70876
0.681299	2.70799
0.681798	2.70761
0.682298	2.70686
0.682797	2.70614
0.683296	2.70531
0.683795	2.70468
0.684294	2.70423
0.684793	2.70382
0.685292	2.70302
0.685791	2.70282
0.686291	2.70318
0.68679	2.70328
0.687289	2.70316
0.687788	2.70303
0.688287	2.70288
0.688786	2.70351
0.689285	2.70478
0.689784	2.70472
0.690283	2.70427
0.690783	2.70445
0.691282	2.70492
0.691781	2.70591
0.69228	2.70664
0.692779	2.70671
0.693278	2.7067
0.693777	2.70748
0.694276	2.70864
0.694776	2.70906
0.695275	2.70928
0.695774	2.70954
0.696273	2.70986
0.696772	2.70941
0.697271	2.70897
0.69777	2.70833
0.698269	2.70766
0.698769	2.7071
0.699268	2.7068
0.699767	2.7072
0.700266	2.70729
0.700765	2.70635
0.701264	2.70494
0.701763	2.70379
0.702262	2.70283
0.702762	2.7022
0.703261	2.70247
0.70376	2.70242
0.704259	2.70168
0.704758	2.70128
0.705257	2.70166
0.705756	2.70201
0.706255	2.70266
0.706754	2.70352
0.707254	2.70424
0.707753	2.70485
0.708252	2.70572
0.708751	2.70683
0.70925	2.70785
0.709749	2.70802
0.710248	2.70826
0.710747	2.70841
0.711247	2.70802
0.711746	2.70728
0.712245	2.70714
0.712744	2.70743
0.713243	2.70811
0.713742	2.70817
0.714241	2.70747
0.71474	2.70727
0.71524	2.70688
0.715739	2.70608
0.716238	2.70594
0.716737	2.70552
0.717236	2.70499
0.717735	2.70526
0.718234	2.70479
0.718733	2.70375
0.719232	2.70323
0.719732	2.70332
0.720231	2.70413
0.72073	2.70386
0.721229	2.703
0.721728	2.7032
0.722227	2.70406
0.722726	2.70494
0.723225	2.70554
0.723725	2.70582
0.724224	2.70552
0.724723	2.70544
0.725222	2.7054
0.725721	2.7056
0.72622	2.70577
0.726719	2.70619
0.727218	2.7075
0.727718	2.70805
0.728217	2.70785
0.728716	2.70797
0.729215	2.70814
0.729714	2.70845
0.730213	2.70843
0.730712	2.7088
0.731211	2.70886
0.73171	2.70843
0.73221	2.70857
0.732709	2.70863
0.733208	2.70862
0.733707	2.70844
0.734206	2.70921
0.734705	2.70949
0.735204	2.70858
0.735703	2.70822
0.736203	2.7088
0.736702	2.70854
0.737201	2.70819
0.7377	2.70767
0.738199	2.70704
0.738698	2.70702
0.739197	2.70716
0.739696	2.70788
0.740196	2.70841
0.740695	2.70943
0.741194	2.70944
0.741693	2.70924
0.742192	2.71006
0.742691	2.7104
0.74319	2.71061
0.743689	2.71064
0.744188	2.71088
0.744688	2.71042
0.745187	2.7096
0.745686	2.70986
0.746185	2.71046
0.746684	2.71022
0.747183	2.70922
0.747682	2.70802
0.748181	2.70727
0.748681	2.70736
0.74918	2.70765
0.749679	2.70806
0.750178	2.70922
0.750677	2.7102
0.751176	2.71128
0.751675	2.71162
0.752174	2.71153
0.752674	2.71171
0.753173	2.71197
0.753672	2.71206
0.754171	2.71235
0.75467	2.7121
0.755169	2.71233
0.755668	2.71154
0.756167	2.71138
0.756666	2.71081
0.757166	2.71126
0.757665	2.71191
0.758164	2.7119
0.758663	2.71107
0.759162	2.71031
0.759661	2.71001
0.76016	2.71047
0.760659	2.71
0.761159	2.70996
0.761658	2.71043
0.762157	2.71204
0.762656	2.71355
0.763155	2.71453
0.763654	2.71461
0.764153	2.71412
0.764652	2.71292
0.765152	2.71287
0.765651	2.71243
0.76615	2.71236
0.766649	2.71241
0.767148	2.71189
0.767647	2.71182
0.768146	2.71219
0.768645	2.71275
0.769145	2.71317
0.769644	2.71396
0.770143	2.71492
0.770642	2.71554
0.771141	2.71593
0.77164	2.71613
0.772139	2.71654
0.772638	2.71848
0.773138	2.71934
0.773637	2.71992
0.774136	2.72133
0.774635	2.72108
0.775134	2.72056
0.775633	2.72117
0.776132	2.72036
0.776631	2.72007
0.77713	2.7215
0.77763	2.72201
0.778129	2.72227
0.778628	2.72231
0.779127	2.72351
0.779626	2.72493
0.780125	2.72557
0.780624	2.72657
0.781123	2.72727
0.781623	2.72845
0.782122	2.72818
0.782621	2.72861
0.78312	2.72979
0.783619	2.73084
0.784118	2.73056
0.784617	2.73103
0.785116	2.73177
0.785616	2.7331
0.786115	2.73276
0.786614	2.73313
0.787113	2.73249
0.787612	2.73277
0.788111	2.73169
0.78861	2.7322
0.789109	2.73415
0.789608	2.7354
0.790108	2.73563
0.790607	2.73524
0.791106	2.73496
0.791605	2.73476
0.792104	2.73429
0.792603	2.73416
0.793102	2.73496
0.793601	2.73434
0.794101	2.73333
0.7946	2.73318
0.795099	2.73334
0.795598	2.73296
0.796097	2.7331
0.796596	2.73348
0.797095	2.73322
0.797594	2.73287
0.798093	2.73314
0.798593	2.73238
0.799092	2.73169
0.799591	2.73219
0.80009	2.7318
0.800589	2.73137
0.801088	2.73187
0.801587	2.73092
0.802086	2.72986
0.802586	2.7297
0.803085	2.72896
0.803584	2.72812
0.804083	2.72711
0.804582	2.72606
0.805081	2.7254
0.80558	2.7247
0.806079	2.72434
0.806579	2.72415
0.807078	2.72375
0.807577	2.7229
0.808076	2.72177
0.808575	2.72168
0.809074	2.72211
0.809573	2.72172
0.810072	2.72086
0.810571	2.72068
0.811071	2.72009
0.81157	2.71975
0.812069	2.71914
0.812568	2.71957
0.813067	2.7194
0.813566	2.71852
0.814065	2.71776
0.814564	2.7174
0.815064	2.71651
0.815563	2.71589
0.816062	2.71622
0.816561	2.71664
0.81706	2.717
0.817559	2.71625
0.818058	2.71675
0.818557	2.71726
0.819057	2.71656
0.819556	2.71514
0.820055	2.71496
0.820554	2.71471
0.821053	2.71419
0.821552	2.71355
0.822051	2.71331
0.82255	2.71233
0.82305	2.71154
0.823549	2.71135
0.824048	2.71052
0.824547	2.7105
0.825046	2.71207
0.825545	2.71203
0.826044	2.71128
0.826543	2.71159
0.827042	2.71166
0.827542	2.71176
0.828041	2.71257
0.82854	2.71314
0.829039	2.71392
0.829538	2.71326
0.830037	2.7139
0.830536	2.7147
0.831035	2.71423
0.831535	2.71446
0.832034	2.71263
0.832533	2.71306
0.833032	2.71399
0.833531	2.71424
0.83403	2.71476
0.834529	2.7166
0.835028	2.71574
0.835528	2.71575
0.836027	2.71688
0.836526	2.71766
0.837025	2.71806
0.837524	2.71732
0.838023	2.71972
0.838522	2.71877
0.839021	2.7188
0.839521	2.71906
0.84002	2.71995
0.840519	2.7208
0.841018	2.72067
0.841517	2.72026
0.842016	2.72104
0.842515	2.71962
0.843014	2.71841
0.843513	2.71933
0.844013	2.71986
0.844512	2.72039
0.845011	2.71975
0.84551	2.71917
0.846009	2.71819
0.846508	2.71852
0.847007	2.7185
0.847506	2.71926
0.848006	2.71935
0.848505	2.71898
0.849004	2.7185
0.849503	2.71744
0.850002	2.71586
0.850501	2.71616
0.851	2.71629
0.851499	2.71528
0.851999	2.71388
0.852498	2.714
0.852997	2.71371
0.853496	2.71257
0.853995	2.71222
0.854494	2.71219
0.854993	2.71105
0.855492	2.70973
0.855991	2.70931
0.856491	2.70874
0.85699	2.70931
0.857489	2.70815
0.857988	2.70789
0.858487	2.70672
0.858986	2.70581
0.859485	2.70534
0.859984	2.70621
0.860484	2.70592
0.860983	2.70504
0.861482	2.7038
0.861981	2.70417
0.86248	2.70404
0.862979	2.70259
0.863478	2.70265
0.863977	2.70187
0.864477	2.7014
0.864976	2.70141
0.865475	2.70137
0.865974	2.70173
0.866473	2.70178
0.866972	2.70175
0.867471	2.70301
0.86797	2.70242
0.868469	2.70118
0.868969	2.70091
0.869468	2.70133
0.869967	2.70203
0.870466	2.7031
0.870965	2.70443
0.871464	2.70523
0.871963	2.70545
0.872462	2.70543
0.872962	2.70548
0.873461	2.70575
0.87396	2.70583
0.874459	2.70529
0.874958	2.70464
0.875457	2.70498
0.875956	2.70541
0.876455	2.70619
0.876954	2.70671
0.877454	2.70704
0.877953	2.70794
0.878452	2.7082
0.878951	2.70903
0.87945	2.71059
0.879949	2.71215
0.880448	2.71312
0.880947	2.7141
0.881447	2.71547
0.881946	2.71726
0.882445	2.71826
0.882944	2.71879
0.883443	2.71872
0.883942	2.71844
0.884441	2.71785
0.88494	2.71726
0.88544	2.71663
0.885939	2.71676
0.886438	2.71678
0.886937	2.7164
0.887436	2.71666
0.887935	2.7172
0.888434	2.71809
0.888933	2.7189
0.889433	2.71939
0.889932	2.71965
0.890431	2.71933
0.89093	2.71914
0.891429	2.71982
0.891928	2.7188
0.892427	2.7183
0.892926	2.71981
0.893426	2.7209
0.893925	2.72062
0.894424	2.72066
0.894923	2.72027
0.895422	2.72037
0.895921	2.72032
0.89642	2.72065
0.896919	2.72055
0.897418	2.72043
0.897918	2.72024
0.898417	2.72037
0.898916	2.72132
0.899415	2.72292
0.899914	2.72396
0.900413	2.72437
0.900912	2.72519
0.901411	2.7256
0.901911	2.72481
0.90241	2.72488
0.902909	2.72404
0.903408	2.72364
0.903907	2.72371
0.904406	2.72318
0.904905	2.72244
0.905404	2.72174
0.905904	2.72152
0.906403	2.7209
0.906902	2.7194
0.907401	2.7184
0.9079	2.71702
0.908399	2.71631
0.908898	2.71593
0.909397	2.71576
0.909896	2.71595
0.910396	2.71681
0.910895	2.71743
0.911394	2.71765
0.911893	2.718
0.912392	2.71753
0.912891	2.71762
0.91339	2.71769
0.913889	2.71756
0.914389	2.71764
0.914888	2.71793
0.915387	2.71778
0.915886	2.71727
0.916385	2.71799
0.916884	2.71686
0.917383	2.71615
0.917882	2.71686
0.918382	2.71787
0.918881	2.71724
0.91938	2.71783
0.919879	2.71861
0.920378	2.71938
0.920877	2.71962
0.921376	2.71937
0.921875	2.71945
0.922374	2.71927
0.922874	2.71917
0.923373	2.71974
0.923872	2.72034
0.924371	2.72112
0.92487	2.72189
0.925369	2.72204
0.925868	2.72234
0.926367	2.7223
0.926867	2.72214
0.927366	2.72309
0.927865	2.72387
0.928364	2.7239
0.928863	2.72407
0.929362	2.72471
0.929861	2.72502
0.93036	2.72512
0.93086	2.72573
0.931359	2.72604
0.931858	2.72573
0.932357	2.72553
0.932856	2.7261
0.933355	2.72617
0.933854	2.728
0.934353	2.72855
0.934852	2.72979
0.935352	2.73041
0.935851	2.73058
0.93635	2.72989
0.936849	2.73131
0.937348	2.73008
0.937847	2.73069
0.938346	2.73102
0.938845	2.73125
0.939345	2.73201
0.939844	2.73151
0.940343	2.73027
0.940842	2.73022
0.941341	2.73132
0.94184	2.73118
0.942339	2.73197
0.942838	2.73144
0.943338	2.73064
0.943837	2.73095
0.944336	2.73181
0.944835	2.73093
0.945334	2.73005
0.945833	2.7287
0.946332	2.72824
0.946831	2.72913
0.94733	2.72845
0.94783	2.72823
0.948329	2.72735
0.948828	2.72627
0.949327	2.72478
0.949826	2.72345
0.950325	2.72175
0.950824	2.72165
0.951323	2.72112
0.951823	2.72075
0.952322	2.7195
0.952821	2.71887
0.95332	2.71907
0.953819	2.72001
0.954318	2.72025
0.954817	2.7196
0.955316	2.71923
0.955816	2.7194
0.956315	2.71934
0.956814	2.72026
0.957313	2.72046
0.957812	2.72083
0.958311	2.72207
0.95881	2.72124
0.959309	2.72261
0.959809	2.72363
0.960308	2.724
0.960807	2.72502
0.961306	2.72642
0.961805	2.72754
0.962304	2.73047
0.962803	2.73159
0.963302	2.73258
0.963801	2.73391
0.964301	2.73325
0.9648	2.73406
0.965299	2.73473
0.965798	2.7351
0.966297	2.73433
0.966796	2.73422
0.967295	2.73437
0.967794	2.73584
0.968294	2.73674
0.968793	2.73652
0.969292	2.73584
0.969791	2.73648
0.97029	2.73742
0.970789	2.73804
0.971288	2.73903
0.971787	2.73837
0.972287	2.73863
0.972786	2.73874
0.973285	2.74
0.973784	2.74159
0.974283	2.74399
0.974782	2.74537
0.975281	2.74669
0.97578	2.74774
0.976279	2.74866
0.976779	2.74954
0.977278	2.75075
0.977777	2.75182
0.978276	2.75196
0.978775	2.75187
0.979274	2.75194
0.979773	2.75317
0.980272	2.75346
0.980772	2.75356
0.981271	2.75396
0.98177	2.75508
0.982269	2.75695
0.982768	2.7559
0.983267	2.75581
0.983766	2.75523
0.984265	2.755
0.984765	2.75433
0.985264	2.75479
0.985763	2.75497
0.986262	2.75359
0.986761	2.75209
0.98726	2.75151
0.987759	2.75126
0.988258	2.75056
0.988757	2.74956
0.989257	2.75018
0.989756	2.75054
0.990255	2.75034
0.990754	2.7497
0.991253	2.75074
0.991752	2.75106
0.992251	2.75112
0.99275	2.75144
0.99325	2.75272
0.993749	2.75302
0.994248	2.75384
0.994747	2.75408
0.995246	2.75437
0.995745	2.7547
0.996244	2.75324
0.996743	2.75317
0.997243	2.75353
[truncated: 27,629 more rows]

## Sheet: V496M_surfer_traces
time (s)	current (nA)
0	-6.27529e-05	-1.47545e-05	1.10907e-05	-0.000195671	2.58595e-05	7.01656e-05
0.001	-0.000411069	-0.000101431	3.37716e-05	-0.0012583	0.000220213	0.000380783
0.002	-0.00124612	-0.000323006	3.49575e-06	-0.00405336	0.000801619	0.000997656
0.003	-0.00248657	-0.000671193	-0.00014684	-0.00905682	0.00184288	0.00176361
0.004	-0.00403158	-0.00110536	-0.00036312	-0.0162042	0.00330399	0.00246118
0.005	-0.00606447	-0.00160071	-0.000462343	-0.0250399	0.00513595	0.00298246
0.006	-0.0088431	-0.00205414	-0.00029785	-0.0348039	0.00709471	0.00337032
0.007	-0.012384	-0.00225827	5.45736e-05	-0.0444487	0.00880698	0.0037378
0.008	-0.0163155	-0.00206514	0.000443565	-0.0528994	0.0101046	0.00413927
0.009	-0.0200892	-0.00151685	0.000896481	-0.0594824	0.0110236	0.00451224
0.01	-0.0233435	-0.000755431	0.00151953	-0.0640346	0.0115869	0.00475956
0.011	-0.0259468	0.000126679	0.00228383	-0.066726	0.0117089	0.00483337
0.012	-0.0279749	0.00104728	0.00309297	-0.0679055	0.0112566	0.00476312
0.013	-0.0295982	0.00186224	0.00392991	-0.067987	0.0102065	0.00471474
0.014	-0.0307654	0.00249024	0.00475135	-0.0673074	0.00872482	0.00491869
0.015	-0.0312772	0.00299464	0.00542869	-0.0661049	0.00707388	0.00549208
0.016	-0.0312144	0.00344365	0.00589722	-0.0646456	0.00549858	0.00641198
0.017	-0.0309503	0.00380416	0.00613611	-0.0632575	0.00419618	0.00758707
0.018	-0.0307128	0.00398828	0.00606737	-0.0622004	0.00325767	0.0088665
0.019	-0.0303854	0.00392446	0.00567413	-0.0615815	0.00262294	0.0100192
0.02	-0.0298222	0.00357628	0.00510731	-0.0614352	0.00215993	0.010765
0.021	-0.029116	0.00295232	0.00453917	-0.0617638	0.00176382	0.0108371
0.022	-0.0283741	0.00217894	0.00403039	-0.0624747	0.00140852	0.0100868
0.023	-0.0275278	0.00149804	0.00365027	-0.0634212	0.00116045	0.00858545
0.024	-0.0265853	0.00113027	0.00349734	-0.0645564	0.00113114	0.0064922
0.025	-0.0257741	0.00120366	0.00358214	-0.0658958	0.00134007	0.00391301
0.026	-0.0252202	0.00171409	0.00388368	-0.0673117	0.00161294	0.00105171
0.027	-0.0247913	0.00255538	0.0043841	-0.0685525	0.00170547	-0.00174597
0.028	-0.0243181	0.00365864	0.00497643	-0.0694646	0.00150984	-0.00415855
0.029	-0.023753	0.00491154	0.00545578	-0.0700669	0.00112283	-0.00596295
0.03	-0.0231777	0.00607586	0.0056951	-0.07046	0.000774688	-0.00696985
0.031	-0.0226612	0.00690274	0.00576804	-0.0708678	0.000664615	-0.00702238
0.032	-0.0222186	0.00721961	0.00582316	-0.0715718	0.000802593	-0.00620511
0.033	-0.0220649	0.00707728	0.00593691	-0.0725286	0.00108346	-0.00489861
0.034	-0.0226003	0.00671567	0.00609884	-0.0734264	0.00144394	-0.00351974
0.035	-0.0239547	0.00632991	0.00625619	-0.0741529	0.00184606	-0.00231729
0.036	-0.0258966	0.00596957	0.00634096	-0.0748244	0.00230267	-0.00139448
0.037	-0.0281528	0.00552935	0.00629893	-0.0755538	0.00290236	-0.000793632
0.038	-0.0304536	0.00487449	0.0061267	-0.0763688	0.00367385	-0.000518875
0.039	-0.0324671	0.0039811	0.00584402	-0.0772282	0.00453969	-0.000564358
0.04	-0.0339421	0.00296689	0.00541266	-0.0780544	0.00538525	-0.000945511
0.041	-0.0348057	0.00207087	0.00474266	-0.0786992	0.00611422	-0.00171246
0.042	-0.0350591	0.00151739	0.00384492	-0.0789715	0.00667416	-0.00290331
0.043	-0.0347167	0.00137769	0.00284691	-0.07878	0.00699159	-0.00442037
0.044	-0.033952	0.00162608	0.00190479	-0.0781841	0.00700845	-0.00597005
0.045	-0.0331127	0.00221665	0.00125627	-0.0773203	0.00685209	-0.00704567
0.046	-0.0323987	0.0029987	0.00107344	-0.0763692	0.00677604	-0.0070843
0.047	-0.0316465	0.00373734	0.00118626	-0.0755789	0.00682121	-0.00589577
0.048	-0.0306032	0.00426309	0.00124395	-0.0751777	0.00674089	-0.00381186
0.049	-0.0293272	0.00449489	0.00108442	-0.0752034	0.00644845	-0.00139965
0.05	-0.0280543	0.00446448	0.000757797	-0.0755217	0.00617686	0.00085036
0.051	-0.026784	0.00431709	0.000383599	-0.0760036	0.00607571	0.00269486
0.052	-0.0253791	0.0041455	0.000169745	-0.0765618	0.00609688	0.00406798
0.053	-0.0239501	0.00395093	0.000365278	-0.0770897	0.00622365	0.00485562
0.054	-0.0227917	0.00374902	0.00106145	-0.0774819	0.00650379	0.00484357
0.055	-0.0220067	0.00356483	0.00211981	-0.0776435	0.00693184	0.00392255
0.056	-0.0214219	0.00339144	0.00325672	-0.07747	0.00742337	0.00223737
0.057	-0.0208026	0.00321296	0.00418462	-0.0768814	0.00790979	7.36229e-05
0.058	-0.0198805	0.00303683	0.00476826	-0.0758601	0.0083551	-0.00225777
0.059	-0.01825	0.00288185	0.00504976	-0.0744826	0.00869844	-0.00439655
0.06	-0.0156145	0.00272923	0.00507466	-0.0728512	0.00890213	-0.00598712
0.061	-0.0121126	0.00257958	0.00480521	-0.0709667	0.00897131	-0.00680345
0.062	-0.00810065	0.00259507	0.0042377	-0.0687966	0.00891047	-0.0067627
0.063	-0.00369765	0.00295749	0.00346043	-0.06649	0.0087557	-0.00587083
0.064	0.00104453	0.00356442	0.00268112	-0.0644638	0.00860891	-0.00418516
0.065	0.00562137	0.00408911	0.00216894	-0.0631929	0.00851189	-0.0018343
0.066	0.00925232	0.0043234	0.0020393	-0.0628686	0.0083458	0.000921163
0.067	0.0114583	0.0042973	0.00217211	-0.063373	0.00799412	0.003754
0.068	0.0121586	0.00411789	0.00230627	-0.0645272	0.00749077	0.00640661
0.069	0.0113455	0.00387064	0.00227739	-0.0662251	0.00696717	0.00864932
0.07	0.00890935	0.0035753	0.00212405	-0.0684085	0.00649701	0.0101971
0.071	0.00494134	0.00318926	0.00183541	-0.0709302	0.0059829	0.0109005
0.072	-1.94382e-05	0.00278484	0.00128663	-0.0734934	0.00535396	0.0109698
0.073	-0.0053561	0.00257116	0.00048493	-0.0757681	0.00480559	0.0108184
0.074	-0.0107321	0.00271257	-0.000395019	-0.0775058	0.00453223	0.0106737
0.075	-0.0159346	0.00327861	-0.0011998	-0.0786507	0.00443677	0.0104302
0.076	-0.0207012	0.00421743	-0.0018577	-0.0793519	0.00434976	0.00987358
0.077	-0.0247632	0.00532239	-0.00225021	-0.0797434	0.00420039	0.00894859
0.078	-0.0279228	0.00635428	-0.00219324	-0.0798333	0.00391856	0.00778552
0.079	-0.0300791	0.00716805	-0.00169137	-0.0796532	0.0034618	0.00653123
0.08	-0.0312376	0.00768599	-0.00104018	-0.0792976	0.00290076	0.00533846
0.081	-0.0316161	0.007854	-0.000498625	-0.0786787	0.00237765	0.00444445
0.082	-0.0316261	0.00763489	-0.000150565	-0.0773086	0.00202683	0.00404821
0.083	-0.0315287	0.0069775	-5.95389e-05	-0.0745512	0.00190839	0.0042014
0.084	-0.0311545	0.0059031	-0.000212047	-0.0701013	0.00197773	0.00481326
0.085	-0.0302122	0.00462597	-0.000494391	-0.064109	0.00215836	0.0056303
0.086	-0.0288481	0.00341674	-0.000759261	-0.0570236	0.00241253	0.00635655
0.087	-0.0274945	0.00235339	-0.00088757	-0.0494102	0.0027339	0.00691856
0.088	-0.0263043	0.00133468	-0.000897845	-0.0417989	0.0031912	0.00744143
0.089	-0.025176	0.000261614	-0.000808233	-0.0346257	0.00386591	0.00801441
0.09	-0.0240772	-0.00090845	-0.00048886	-0.0282447	0.00463459	0.00862433
0.091	-0.0231155	-0.00210999	0.000186999	-0.0229481	0.00519801	0.00920815
0.092	-0.0223521	-0.00313205	0.00114551	-0.0189826	0.00531557	0.00965215
0.093	-0.0216589	-0.00377797	0.00212461	-0.0165101	0.00492399	0.0097973
0.094	-0.0209156	-0.00396774	0.00292616	-0.0155245	0.0041301	0.00961806
0.095	-0.0201261	-0.00373805	0.00354608	-0.0158707	0.00307443	0.00926688
0.096	-0.0192953	-0.0032515	0.00403291	-0.0173564	0.00180293	0.00878233
0.097	-0.0184243	-0.0027439	0.00437483	-0.0197944	0.000354294	0.00802587
0.098	-0.0175915	-0.00242548	0.00455502	-0.0230001	-0.00114542	0.00698164
0.099	-0.0169409	-0.00229767	0.00463382	-0.0268117	-0.00255793	0.00582238
0.1	-0.0166176	-0.00218342	0.00471425	-0.0310545	-0.0037887	0.00474513
0.101	-0.0166508	-0.00201153	0.00485276	-0.0354383	-0.00475751	0.00391297
0.102	-0.0169187	-0.00184444	0.0049834	-0.0395994	-0.0053607	0.00338046
0.103	-0.0173335	-0.00172972	0.00497312	-0.0433371	-0.00542703	0.00305629
0.104	-0.0178891	-0.00166979	0.00477036	-0.0466662	-0.00481068	0.00281961
0.105	-0.0185321	-0.00165257	0.00435988	-0.0495985	-0.00363638	0.00257028
0.106	-0.0192071	-0.00162567	0.003664	-0.0520591	-0.00230922	0.00219973
0.107	-0.0199794	-0.00144127	0.00267386	-0.0539779	-0.00122534	0.00160499
0.108	-0.0209855	-0.000939187	0.00154335	-0.0552907	-0.000587871	0.00076049
0.109	-0.0222653	-0.000147707	0.000440094	-0.0559298	-0.000404098	-0.000187041
0.11	-0.0237294	0.000676142	-0.00049526	-0.0559128	-0.000510245	-0.000994453
0.111	-0.0252379	0.0012946	-0.00113714	-0.0553418	-0.000711169	-0.00148085
0.112	-0.0266719	0.00170528	-0.00150249	-0.0543736	-0.000977912	-0.0015672
0.113	-0.0278933	0.00205093	-0.00161805	-0.0532675	-0.00139816	-0.00128553
0.114	-0.0286367	0.00239348	-0.00139611	-0.0522611	-0.00193643	-0.000720108
0.115	-0.0287935	0.00265498	-0.000896033	-0.0514018	-0.00241256	4.39668e-05
0.116	-0.0287285	0.00274712	-0.000327716	-0.050623	-0.00270954	0.000883682
0.117	-0.0288774	0.002603	0.000244937	-0.0499257	-0.00280824	0.00169654
0.118	-0.0292481	0.00220744	0.000866367	-0.0494156	-0.00266752	0.00248662
0.119	-0.0295807	0.00168404	0.00148386	-0.0491536	-0.00222351	0.0035436
0.12	-0.0297531	0.0011907	0.00193372	-0.0491267	-0.00141953	0.00544481
0.121	-0.0298359	0.000826203	0.00207828	-0.0493261	-0.000285239	0.00836539
0.122	-0.0298437	0.00059727	0.0019116	-0.0496385	0.000926642	0.0117282
0.123	-0.0296833	0.00045021	0.00145788	-0.04987	0.001888	0.0147415
0.124	-0.0293576	0.000459591	0.000746005	-0.0499379	0.00248744	0.016821
0.125	-0.0289715	0.00080624	-3.55436e-05	-0.0498373	0.00277072	0.0177039
0.126	-0.0285797	0.0015218	-0.000629724	-0.0495978	0.00273915	0.0173949
0.127	-0.0281657	0.0024497	-0.00095556	-0.0492557	0.00242924	0.0160311
0.128	-0.0277	0.00340114	-0.0010835	-0.0488154	0.00198263	0.0139147
0.129	-0.0271625	0.00414333	-0.00107106	-0.0483431	0.00152194	0.0114565
0.13	-0.0265538	0.00443051	-0.000953257	-0.0479485	0.00113238	0.00904113
0.131	-0.025942	0.00420504	-0.000721375	-0.0476921	0.000888262	0.00701567
0.132	-0.0254852	0.0035512	-0.000325061	-0.0476454	0.000826257	0.00557398
0.133	-0.0252643	0.00257934	0.000157278	-0.0479335	0.001024	0.0046521
0.134	-0.0251151	0.00142837	0.000546689	-0.0486119	0.00160873	0.00408978
0.135	-0.0248848	0.000204541	0.000773604	-0.0496158	0.00258981	0.00376632
0.136	-0.0246929	-0.00097525	0.000917339	-0.0508881	0.00382221	0.00358911
0.137	-0.0246356	-0.0019277	0.00104644	-0.052373	0.00511832	0.00350065
0.138	-0.0245885	-0.00253061	0.0011262	-0.0539929	0.00626951	0.00344197
0.139	-0.0245036	-0.00281487	0.0011725	-0.0557428	0.00706163	0.00333844
0.14	-0.0245469	-0.00291819	0.00128582	-0.0575325	0.00742554	0.00314771
0.141	-0.0248476	-0.00302077	0.0015043	-0.0591046	0.00744389	0.00282281
0.142	-0.0252778	-0.00324203	0.00178836	-0.060293	0.00714404	0.00236436
0.143	-0.0255906	-0.00348411	0.00206828	-0.0610741	0.00651654	0.00191211
0.144	-0.0257405	-0.00347605	0.00228997	-0.0614461	0.0057037	0.00158696
0.145	-0.0257775	-0.00308175	0.00244949	-0.0614437	0.00488784	0.00142151
0.146	-0.0255504	-0.00243398	0.00254207	-0.0611432	0.00408558	0.00145233
0.147	-0.0249642	-0.00170796	0.00249819	-0.0606027	0.00328194	0.00162371
0.148	-0.0242409	-0.000979996	0.0022375	-0.0598834	0.00253206	0.00180925
0.149	-0.023615	-0.000300444	0.00173775	-0.0590955	0.00186435	0.002013
0.15	-0.0231278	0.000331596	0.00106046	-0.0583768	0.00134633	0.00230012
0.151	-0.0227792	0.000948968	0.000366598	-0.0578745	0.00104637	0.00265413
0.152	-0.0225878	0.00142758	-0.000276781	-0.0576972	0.000856562	0.00300474
0.153	-0.0225692	0.00153918	-0.00100311	-0.0578559	0.000646285	0.00327734
0.154	-0.0227124	0.00119812	-0.00187753	-0.0582888	0.000493974	0.00339951
0.155	-0.0230306	0.000494215	-0.00276153	-0.058916	0.000536766	0.00325416
0.156	-0.0236922	-0.000370902	-0.00346733	-0.0596434	0.000757574	0.00279996
0.157	-0.0247432	-0.00121493	-0.00384729	-0.0603054	0.00111081	0.00218523
0.158	-0.0257993	-0.00204229	-0.00380996	-0.0606931	0.00164216	0.00157278
0.159	-0.0264053	-0.00294918	-0.0034118	-0.0606899	0.00236177	0.00110375
0.16	-0.0265173	-0.00395871	-0.00282934	-0.0603051	0.00320343	0.00092599
0.161	-0.0263714	-0.00496102	-0.00218007	-0.0596336	0.00411073	0.00103504
0.162	-0.0260577	-0.00579048	-0.00147304	-0.0588686	0.00502006	0.00135781
0.163	-0.0255172	-0.00647009	-0.000692937	-0.058243	0.0058467	0.00194463
0.164	-0.024784	-0.00715315	0.000136766	-0.0579059	0.00658184	0.00284325
0.165	-0.0238895	-0.0078163	0.00104042	-0.0579094	0.00731578	0.00393867
0.166	-0.0225349	-0.00829414	0.00212559	-0.0582868	0.00814986	0.00495533
0.167	-0.0201856	-0.00849408	0.00333712	-0.0590926	0.00907563	0.00553795
0.168	-0.0165537	-0.00840707	0.00436424	-0.0602464	0.009944	0.00542805
0.169	-0.0117285	-0.00802838	0.00493556	-0.0614321	0.0106596	0.00458769
0.17	-0.00602279	-0.00734452	0.0049955	-0.0623464	0.0112309	0.00318476
0.171	-5.25421e-06	-0.0063536	0.00457833	-0.0629099	0.0116246	0.00153513
0.172	0.00548542	-0.00508207	0.00379473	-0.0631699	0.011819	-5.15e-05
0.173	0.00970304	-0.00357808	0.0028856	-0.0631162	0.0118695	-0.00145959
0.174	0.0123355	-0.00194821	0.00203928	-0.0626984	0.0118495	-0.0027446
0.175	0.0133471	-0.000370402	0.00123422	-0.0620038	0.011808	-0.00393393
0.176	0.0127221	0.00100527	0.000339139	-0.0611655	0.0117271	-0.00492409
0.177	0.0105209	0.0021386	-0.000753088	-0.06009	0.0115119	-0.00563068
0.178	0.00707603	0.00306998	-0.00205494	-0.0586073	0.0110355	-0.00609339
0.179	0.00297454	0.00377483	-0.003426	-0.0568011	0.0102028	-0.00628905
0.18	-0.00132832	0.00413611	-0.00465075	-0.0549455	0.00901937	-0.00605215
0.181	-0.00573293	0.00414057	-0.00555416	-0.0533282	0.00755921	-0.00525138
0.182	-0.0101701	0.00390669	-0.00598055	-0.0521483	0.0059181	-0.00400374
0.183	-0.0144072	0.00350182	-0.00583872	-0.0514285	0.0042796	-0.00270063
0.184	-0.0183267	0.00294254	-0.00521542	-0.0511577	0.00288608	-0.00172462
0.185	-0.0219952	0.00228623	-0.00426938	-0.0513569	0.00197655	-0.00127256
0.186	-0.0253452	0.00162125	-0.00311359	-0.0518992	0.0017448	-0.00137798
0.187	-0.0281178	0.00102967	-0.00188538	-0.0525586	0.00220057	-0.00194051
0.188	-0.0301408	0.000573727	-0.000780972	-0.0532169	0.00314979	-0.00283947
0.189	-0.0314726	0.000348997	1.24522e-05	-0.053896	0.00436747	-0.00394815
0.19	-0.0323175	0.000443136	0.000444673	-0.0546995	0.00571008	-0.00508978
0.191	-0.0328006	0.000861311	0.000579328	-0.0556989	0.00705328	-0.006084
0.192	-0.0328599	0.00150859	0.000461418	-0.0567832	0.00827015	-0.00676521
0.193	-0.0324627	0.00215197	0.000159052	-0.0577198	0.00929307	-0.00708647
0.194	-0.0317475	0.00262722	-0.000185815	-0.0583316	0.010022	-0.00711925
0.195	-0.0308693	0.00299524	-0.000428544	-0.0585652	0.0102382	-0.00681417
0.196	-0.0299088	0.00332756	-0.000500316	-0.0585519	0.0098117	-0.00601667
0.197	-0.0289534	0.00361504	-0.000400662	-0.0585394	0.00886605	-0.00468504
0.198	-0.0281594	0.00388176	-0.000143676	-0.0586226	0.00757724	-0.00291845
0.199	-0.0277178	0.00411496	0.000239672	-0.0587117	0.00601538	-0.000880325
0.2	-0.0277295	0.00413346	0.000677442	-0.0588188	0.00428343	0.00123269
0.201	-0.0280947	0.00376596	0.00112126	-0.0590378	0.00260631	0.00319778
0.202	-0.028575	0.0030705	0.00159704	-0.0592876	0.00119426	0.00478219
0.203	-0.0289356	0.00221213	0.00210693	-0.0594968	0.000115551	0.00581386
0.204	-0.0290039	0.00126146	0.0025692	-0.0597719	-0.000606034	0.00628137
0.205	-0.0287149	0.000264688	0.00288805	-0.060195	-0.000863717	0.00626233
0.206	-0.0281183	-0.000631965	0.00306138	-0.0607763	-0.00057601	0.00586034
0.207	-0.0273256	-0.00126957	0.00321074	-0.0614199	0.000183335	0.00534286
0.208	-0.0264702	-0.00160215	0.0034781	-0.0619077	0.00122374	0.00509392
0.209	-0.0256479	-0.00172357	0.00392799	-0.0621219	0.00232643	0.00531324
0.21	-0.0248983	-0.00179805	0.00455599	-0.062032	0.00334839	0.00590231
0.211	-0.0241947	-0.00191016	0.00534706	-0.0615319	0.00424136	0.00663442
0.212	-0.0233964	-0.00200862	0.00620853	-0.0605323	0.00500587	0.00733424
0.213	-0.0223786	-0.00202511	0.00692874	-0.0591352	0.00572301	0.00792615
0.214	-0.0212056	-0.00197452	0.00739371	-0.0576065	0.00647001	0.00832273
0.215	-0.0200668	-0.00191194	0.00769564	-0.056163	0.00722598	0.00835799
0.216	-0.0191365	-0.00181805	0.00798349	-0.0549383	0.00795001	0.00796566
0.217	-0.0185525	-0.00162251	0.00839452	-0.0540688	0.00854508	0.00726213
0.218	-0.0184141	-0.00132828	0.00903837	-0.0536032	0.00883762	0.00638973
0.219	-0.0187469	-0.000990282	0.00982002	-0.0534202	0.00876188	0.00550781
0.22	-0.0195486	-0.000658874	0.010475	-0.0533218	0.00839337	0.00483364
0.221	-0.0207325	-0.000334408	0.0108792	-0.0531863	0.00777225	0.00441139
0.222	-0.0220331	8.34135e-05	0.0109762	-0.0529937	0.0068613	0.00415177
0.223	-0.0232265	0.000647838	0.0106646	-0.0527679	0.00567871	0.00420921
0.224	-0.0242394	0.00131743	0.0100411	-0.052631	0.00434624	0.0047695
0.225	-0.0250113	0.00211059	0.00936517	-0.052735	0.0029908	0.00562181
0.226	-0.0255396	0.00297991	0.00878282	-0.0530929	0.00166278	0.00641759
0.227	-0.0258249	0.00373682	0.00830245	-0.053595	0.000305319	0.00701229
0.228	-0.0257424	0.00434137	0.00792594	-0.0540339	-0.00123887	0.00738657
0.229	-0.0252844	0.00491173	0.00768224	-0.0541978	-0.00301094	0.00756967
0.23	-0.0247113	0.00546893	0.00755236	-0.0540516	-0.00473578	0.00764296
0.231	-0.0242862	0.00600195	0.00744738	-0.0537252	-0.00605246	0.00770716
0.232	-0.024084	0.00658074	0.00729326	-0.0533565	-0.00682297	0.00783404
0.233	-0.0240486	0.00726354	0.00709769	-0.053059	-0.007085	0.00802087
0.234	-0.0240919	0.00807365	0.00691182	-0.0530195	-0.00684726	0.00820579
0.235	-0.0241589	0.00897274	0.00677325	-0.0534181	-0.00611707	0.00830384
0.236	-0.0242933	0.00980052	0.00669144	-0.0542344	-0.00504074	0.00820174
0.237	-0.0246353	0.010392	0.00658443	-0.0552603	-0.00385634	0.00778731
0.238	-0.0253047	0.0107143	0.00632221	-0.0562371	-0.00282855	0.00712644
0.239	-0.0262614	0.0108824	0.00595119	-0.0569373	-0.00216739	0.0065427
0.24	-0.027353	0.0110737	0.00564488	-0.057224	-0.00186929	0.00636277
0.241	-0.0285066	0.0113717	0.00539429	-0.057066	-0.0017094	0.0066327
0.242	-0.0297184	0.0117808	0.0050194	-0.0565252	-0.00140917	0.00717346
0.243	-0.0308694	0.0123085	0.00445727	-0.0557465	-0.000831499	0.00789982
0.244	-0.0317224	0.0128531	0.00382343	-0.0548646	-2.80692e-05	0.00889812
0.245	-0.0321793	0.0132348	0.00328495	-0.0539745	0.000931941	0.0101656
0.246	-0.0323634	0.0134152	0.00301527	-0.0531927	0.00206436	0.0115464
0.247	-0.032395	0.0134451	0.00309886	-0.0526143	0.00329857	0.012855
0.248	-0.0322657	0.0133006	0.00340556	-0.0523461	0.00438113	0.0139057
0.249	-0.0318886	0.0129704	0.00367386	-0.0525568	0.00510608	0.0145435
0.25	-0.0312559	0.0124513	0.00374142	-0.0533261	0.00546906	0.0147268
0.251	-0.0305862	0.0115799	0.00365812	-0.0545588	0.00554137	0.014594
0.252	-0.0301306	0.0101671	0.00356139	-0.0560504	0.00543536	0.0143566
0.253	-0.0298606	0.00828071	0.00346562	-0.0575858	0.005337	0.0141025
0.254	-0.0295649	0.00624906	0.00322919	-0.0590052	0.00536864	0.013761
0.255	-0.0291268	0.00444642	0.00280857	-0.0601844	0.00547006	0.0132072
0.256	-0.0285207	0.00306809	0.00234072	-0.0610288	0.00548667	0.0123126
0.257	-0.0276961	0.00207461	0.00187141	-0.0614622	0.0053879	0.0110019
0.258	-0.0266339	0.00136444	0.00135855	-0.0614228	0.00530824	0.00935077
0.259	-0.0255025	0.000928294	0.000860251	-0.0610237	0.00539605	0.00758349
0.26	-0.0246228	0.000815632	0.000457658	-0.0605599	0.00576105	0.00600152
0.261	-0.0242257	0.00101547	0.000227292	-0.0601636	0.00643425	0.00484713
0.262	-0.0243083	0.0014346	0.000262147	-0.0597133	0.00725314	0.00424048
0.263	-0.0246324	0.00203583	0.000545606	-0.0591251	0.0079339	0.00419684
0.264	-0.0248799	0.00281997	0.00101767	-0.0584862	0.00837262	0.00458297
0.265	-0.0249083	0.00363016	0.00171343	-0.0579423	0.00875802	0.00519466
0.266	-0.0247446	0.00421294	0.00265326	-0.0575596	0.00928845	0.00581958
0.267	-0.0244031	0.00448014	0.00374163	-0.0573346	0.00988621	0.00617341
0.268	-0.023868	0.00447657	0.00478277	-0.0572937	0.0102877	0.00605936
0.269	-0.023188	0.00416297	0.00551811	-0.0574752	0.0103733	0.00557876
0.27	-0.0224795	0.0034752	0.00574197	-0.0578356	0.0102606	0.00497896
0.271	-0.0218101	0.00243444	0.00539387	-0.0582307	0.0100745	0.00444004
0.272	-0.0211889	0.00119014	0.0045305	-0.058522	0.0097923	0.00413223
0.273	-0.0207469	1.8399e-05	0.00325674	-0.0586947	0.00926273	0.00418857
0.274	-0.0206766	-0.000912801	0.00173537	-0.0588083	0.00832535	0.00452236
0.275	-0.0209062	-0.00166152	0.000258302	-0.0589182	0.00701212	0.00493528
0.276	-0.021112	-0.00228804	-0.000931829	-0.0590778	0.00561315	0.00537539
0.277	-0.0208985	-0.00270454	-0.00188683	-0.0593161	0.00444125	0.00591936
0.278	-0.019814	-0.00290142	-0.00274352	-0.0596914	0.0035745	0.00660719
0.279	-0.0175282	-0.00309796	-0.00336499	-0.0603221	0.00294849	0.00745069
0.28	-0.0140986	-0.00343958	-0.00347051	-0.061189	0.00256271	0.00846359
0.281	-0.00991889	-0.00381371	-0.00304423	-0.0620599	0.0024562	0.00959212
0.282	-0.00542593	-0.00406986	-0.00237714	-0.0627095	0.00259611	0.0107622
0.283	-0.000972816	-0.00417854	-0.001768	-0.0630363	0.00290266	0.0119497
0.284	0.00305135	-0.00417095	-0.00137469	-0.0630221	0.00335551	0.0130972
0.285	0.00619361	-0.00408693	-0.0012797	-0.0627554	0.00390624	0.0140974
0.286	0.00810388	-0.00398208	-0.00146676	-0.0624194	0.00439975	0.0148567
0.287	0.00865492	-0.0038986	-0.00176672	-0.0621805	0.00474607	0.0152369
0.288	0.0079273	-0.00383955	-0.00194554	-0.0621786	0.00492024	0.0150811
0.289	0.00608298	-0.0037677	-0.00187982	-0.0625154	0.00485061	0.0143411
0.29	0.00333126	-0.00360757	-0.00161961	-0.0630661	0.00454459	0.0131573
0.291	5.4549e-05	-0.00329767	-0.00124963	-0.0634529	0.00419279	0.0118283
0.292	-0.00321604	-0.00287698	-0.000801418	-0.0632594	0.00406971	0.0105892
0.293	-0.00578692	-0.00248692	-0.000290534	-0.0620103	0.00441897	0.00952256
0.294	-0.00641178	-0.00226673	0.000210141	-0.0588712	0.00546087	0.00870347
0.295	-0.00306923	-0.00229854	0.00058514	-0.0526582	0.00744988	0.00822756
0.296	0.00645777	-0.00259134	0.000829268	-0.0423845	0.010691	0.00813635
0.297	0.023642	-0.00302674	0.00109205	-0.0277972	0.0155567	0.00850928
0.298	0.0486819	-0.00339794	0.00152565	-0.00948572	0.0224967	0.0095943
0.299	0.0804647	-0.0035396	0.00219643	0.011354	0.031823	0.0117973
0.3	0.116778	-0.00336924	0.00332478	0.0332654	0.0434334	0.0156013
0.301	0.15466	-0.0028299	0.00552348	0.0547028	0.0568401	0.0213987
0.302	0.191032	-0.0018243	0.00975776	0.0740378	0.0712752	0.0293497
0.303	0.223405	-0.000298225	0.0172984	0.0897036	0.0858604	0.0393343
0.304	0.249991	0.00158671	0.0294639	0.1005	0.10008	0.0509899
0.305	0.269603	0.0036672	0.0470249	0.105935	0.114221	0.0638089
0.306	0.282058	0.00623221	0.0698367	0.10641	0.129294	0.0771633
0.307	0.288579	0.0101267	0.0969956	0.103071	0.146629	0.0903739
0.308	0.291521	0.0165423	0.127274	0.0974717	0.167667	0.102948
0.309	0.293792	0.0267028	0.159575	0.0913361	0.193668	0.114945
0.31	0.29848	0.0415415	0.193402	0.0864121	0.2253	0.1272
0.311	0.308583	0.0614444	0.229136	0.0841494	0.262544	0.141132
0.312	0.326768	0.0860451	0.267869	0.0853857	0.304895	0.158357
0.313	0.355216	0.114226	0.310977	0.0904544	0.351526	0.180302
0.314	0.395467	0.144513	0.359631	0.0994598	0.401332	0.207898
0.315	0.448121	0.175734	0.414428	0.112298	0.453003	0.241536
0.316	0.512336	0.207515	0.475272	0.128575	0.505179	0.281097
0.317	0.5856	0.240495	0.541429	0.147746	0.556599	0.325911
0.318	0.66422	0.276297	0.611678	0.169253	0.60621	0.374829
0.319	0.743929	0.317086	0.684527	0.192405	0.65324	0.426478
0.32	0.820185	0.364666	0.758469	0.21626	0.697273	0.479604
0.321	0.888524	0.419833	0.83217	0.239748	0.738134	0.533204
0.322	0.945128	0.48239	0.904366	0.261804	0.775546	0.58648
0.323	0.987012	0.551435	0.973648	0.281343	0.808915	0.638831
0.324	1.01142	0.625588	1.03831	0.297017	0.837431	0.689819
0.325	1.01462	0.703328	1.09643	0.306418	0.860164	0.738988
0.326	0.990878	0.783276	1.14612	0.305131	0.875986	0.785448
0.327	0.932778	0.864017	1.18566	0.287007	0.883082	0.827721
0.328	0.833775	0.943801	1.21338	0.246191	0.878175	0.864329
0.329	0.691592	1.02073	1.22758	0.179371	0.856556	0.894105
0.33	0.510502	1.09298	1.22674	0.0864761	0.813232	0.915705
0.331	0.301246	1.15855	1.20978	-0.0294848	0.744309	0.926996
0.332	0.0787954	1.21507	1.17562	-0.162608	0.648165	0.924637
0.333	-0.140488	1.25999	1.12191	-0.305165	0.526103	0.904245
0.334	-0.341342	1.29079	1.04431	-0.449363	0.382247	0.86131
0.335	-0.511869	1.30516	0.937277	-0.588641	0.223046	0.792434
0.336	-0.645213	1.30111	0.796302	-0.718262	0.0564838	0.696417
0.337	-0.739995	1.27712	0.62026	-0.835432	-0.109084	0.574898
0.338	-0.799552	1.23168	0.412925	-0.938981	-0.26616	0.432345
0.339	-0.830479	1.1622	0.183126	-1.02872	-0.409058	0.275332
0.34	-0.840784	1.06441	-0.0566516	-1.10488	-0.534328	0.111556
0.341	-0.838012	0.933114	-0.292749	-1.16767	-0.640685	-0.0510941
0.342	-0.827842	0.764691	-0.512822	-1.2172	-0.728678	-0.20555
0.343	-0.813465	0.559682	-0.707522	-1.25365	-0.800058	-0.346442
0.344	-0.795552	0.324189	-0.871242	-1.27724	-0.856989	-0.470591
0.345	-0.772565	0.0692922	-1.00231	-1.28788	-0.901421	-0.576949
0.346	-0.741582	-0.190909	-1.10263	-1.28466	-0.934644	-0.666006
0.347	-0.699604	-0.441883	-1.17659	-1.26593	-0.957081	-0.739109
0.348	-0.644469	-0.67101	-1.2293	-1.23038	-0.968556	-0.797894
0.349	-0.575194	-0.869162	-1.26509	-1.17807	-0.968856	-0.843825
0.35	-0.492387	-1.03166	-1.28658	-1.11045	-0.95804	-0.877964
0.351	-0.398566	-1.15833	-1.29469	-1.03021	-0.936561	-0.900814
0.352	-0.297772	-1.25241	-1.28906	-0.941442	-0.905398	-0.912346
0.353	-0.194667	-1.31903	-1.26875	-0.849535	-0.866026	-0.912309
0.354	-0.0937714	-1.36355	-1.2331	-0.759441	-0.820193	-0.900667
0.355	0.000761881	-1.39019	-1.18222	-0.67365	-0.769809	-0.877953
0.356	0.0852678	-1.40146	-1.11714	-0.592027	-0.71699	-0.845377
0.357	0.157015	-1.39829	-1.03993	-0.513117	-0.663865	-0.804707
0.358	0.214455	-1.38035	-0.953604	-0.435416	-0.612263	-0.758125
0.359	0.257025	-1.34668	-0.862021	-0.358361	-0.563561	-0.707991
0.36	0.285021	-1.2966	-0.769439	-0.2828	-0.518629	-0.656434
0.361	0.299626	-1.23036	-0.679885	-0.210444	-0.478013	-0.605264
0.362	0.302684	-1.14941	-0.596742	-0.142994	-0.442044	-0.556114
0.363	0.296236	-1.05631	-0.522493	-0.0818901	-0.410714	-0.510358
0.364	0.282154	-0.954557	-0.458632	-0.028421	-0.383725	-0.469006
0.365	0.262069	-0.84825	-0.4058	0.016287	-0.360662	-0.432723
0.366	0.237567	-0.741689	-0.363897	0.0514655	-0.341092	-0.401768
0.367	0.210274	-0.638939	-0.332168	0.0768607	-0.324608	-0.375977
0.368	0.181791	-0.543518	-0.309439	0.0926502	-0.310753	-0.354901
0.369	0.153614	-0.458132	-0.294362	0.0994955	-0.298955	-0.337794
0.37	0.126886	-0.384548	-0.285535	0.0990723	-0.288626	-0.323731
0.371	0.102131	-0.323647	-0.281541	0.0942586	-0.279273	-0.311946
0.372	0.0794	-0.275543	-0.281066	0.0884154	-0.270553	-0.301925
0.373	0.0586508	-0.239704	-0.283026	0.0842145	-0.262351	-0.29327
0.374	0.0397879	-0.21501	-0.286518	0.0827908	-0.25471	-0.285642
0.375	0.0224781	-0.199822	-0.29069	0.0840748	-0.24767	-0.278766
0.376	0.00629686	-0.192271	-0.294781	0.087834	-0.241346	-0.272432
0.377	-0.00900246	-0.190549	-0.29831	0.0939781	-0.235912	-0.266514
0.378	-0.0235146	-0.192964	-0.30102	0.102146	-0.231376	-0.260948
0.379	-0.037318	-0.198045	-0.302676	0.111641	-0.227483	-0.255616
0.38	-0.0504625	-0.20464	-0.30305	0.121753	-0.223838	-0.250339
0.381	-0.0628622	-0.211775	-0.30202	0.132036	-0.220138	-0.24495
0.382	-0.0742693	-0.218657	-0.299711	0.142305	-0.216345	-0.239263
0.383	-0.0844806	-0.224842	-0.296478	0.152333	-0.212569	-0.233193
0.384	-0.0935042	-0.230184	-0.292678	0.161719	-0.208775	-0.22689
0.385	-0.101384	-0.234644	-0.288526	0.170037	-0.204775	-0.220624
0.386	-0.107985	-0.238131	-0.284153	0.176768	-0.200484	-0.214632
0.387	-0.113094	-0.240507	-0.279701	0.181206	-0.196022	-0.209041
0.388	-0.116645	-0.241757	-0.275309	0.182626	-0.19162	-0.203842
0.389	-0.118817	-0.242034	-0.271104	0.180455	-0.187481	-0.199017
0.39	-0.119964	-0.241521	-0.267208	0.174328	-0.183706	-0.19465
0.391	-0.120482	-0.240326	-0.263651	0.164339	-0.180343	-0.190871
0.392	-0.120632	-0.238559	-0.260341	0.151271	-0.177403	-0.187664
0.393	-0.120477	-0.236407	-0.25716	0.136485	-0.174837	-0.184827
0.394	-0.119977	-0.234044	-0.25404	0.121691	-0.172514	-0.182178
0.395	-0.119106	-0.231537	-0.250992	0.108673	-0.170254	-0.17964
0.396	-0.117852	-0.228878	-0.247971	0.0988741	-0.167945	-0.177155
0.397	-0.116201	-0.225989	-0.244829	0.0930357	-0.165576	-0.174685
0.398	-0.114138	-0.222835	-0.241483	0.0910989	-0.163161	-0.172271
0.399	-0.111732	-0.219577	-0.237957	0.092518	-0.160651	-0.170032
0.4	-0.109147	-0.216502	-0.234318	0.0966466	-0.157938	-0.167934
0.401	-0.106483	-0.213854	-0.230776	0.102709	-0.155011	-0.165719
0.402	-0.103722	-0.211648	-0.227647	0.10959	-0.152015	-0.163221
0.403	-0.100934	-0.209743	-0.225029	0.11597	-0.149075	-0.160529
0.404	-0.098364	-0.20794	-0.222669	0.120725	-0.146153	-0.15783
0.405	-0.0961205	-0.205955	-0.220244	0.123249	-0.143201	-0.155207
0.406	-0.0940261	-0.203652	-0.217607	0.12369	-0.140292	-0.152635
0.407	-0.091985	-0.20117	-0.214795	0.122739	-0.137563	-0.150225
0.408	-0.0900493	-0.19867	-0.211936	0.121047	-0.135099	-0.148191
0.409	-0.0881112	-0.196172	-0.209177	0.118985	-0.132884	-0.146496
0.41	-0.0860442	-0.193579	-0.206551	0.116908	-0.130903	-0.144834
0.411	-0.0839052	-0.190862	-0.203886	0.115283	-0.129221	-0.142986
0.412	-0.0816843	-0.188155	-0.200918	0.114469	-0.127879	-0.140998
0.413	-0.0792946	-0.185599	-0.197552	0.114736	-0.126813	-0.138968
0.414	-0.0768051	-0.183214	-0.193931	0.116342	-0.125827	-0.136866
0.415	-0.0743309	-0.180926	-0.190323	0.119261	-0.124652	-0.134609
0.416	-0.0719296	-0.178598	-0.18699	0.123117	-0.123146	-0.132103
0.417	-0.069637	-0.176166	-0.184015	0.127384	-0.121251	-0.129264
0.418	-0.0674332	-0.173736	-0.181172	0.131586	-0.118935	-0.126135
0.419	-0.0653466	-0.171391	-0.178151	0.13543	-0.116282	-0.122832
0.42	-0.0634952	-0.169062	-0.174895	0.138711	-0.113389	-0.119471
0.421	-0.0618976	-0.166717	-0.171481	0.141177	-0.110316	-0.116213
0.422	-0.0604556	-0.16447	-0.167939	0.142586	-0.107247	-0.113207
0.423	-0.0590004	-0.162434	-0.164387	0.142947	-0.104457	-0.110493
0.424	-0.0572228	-0.16056	-0.161048	0.142729	-0.102131	-0.108031
0.425	-0.0548067	-0.15868	-0.158039	0.142829	-0.100325	-0.105723
0.426	-0.0517113	-0.156675	-0.155302	0.144222	-0.0990153	-0.103516
0.427	-0.0481445	-0.15452	-0.152662	0.147531	-0.0981699	-0.101521
0.428	-0.0442489	-0.152235	-0.149957	0.152845	-0.0976908	-0.0998459
0.429	-0.040054	-0.149801	-0.147163	0.159702	-0.0973624	-0.0984265
0.43	-0.0356318	-0.147118	-0.144335	0.167096	-0.0969832	-0.0971346
0.431	-0.0310433	-0.144145	-0.141618	0.173704	-0.0964581	-0.0958965
0.432	-0.026346	-0.140973	-0.139144	0.178279	-0.0957314	-0.0947016
0.433	-0.0217091	-0.137687	-0.136801	0.179996	-0.094751	-0.0935331
0.434	-0.0172739	-0.134338	-0.134379	0.178789	-0.0934944	-0.0922578
0.435	-0.0130509	-0.131053	-0.131838	0.175355	-0.0919681	-0.0906937
0.436	-0.00902279	-0.127962	-0.129256	0.170612	-0.090188	-0.0887491
0.437	-0.00516248	-0.125047	-0.126698	0.165249	-0.0883196	-0.0865047
0.438	-0.00144493	-0.122191	-0.124286	0.159786	-0.0867864	-0.0842216
0.439	0.00209838	-0.119376	-0.122166	0.154772	-0.0859743	-0.0821151
0.44	0.00543636	-0.116765	-0.12033	0.150828	-0.085855	-0.0801846
0.441	0.00866149	-0.114484	-0.118582	0.148619	-0.0860237	-0.0783549
0.442	0.0119813	-0.112464	-0.116697	0.148636	-0.0860526	-0.0766184
0.443	0.0155456	-0.110571	-0.114558	0.1508	-0.0857469	-0.0750099
0.444	0.0193777	-0.10874	-0.112209	0.15438	-0.0851106	-0.073531
0.445	0.023472	-0.106924	-0.109804	0.158203	-0.0841978	-0.0721293
0.446	0.0278173	-0.105093	-0.107485	0.161019	-0.0830586	-0.0707065
0.447	0.0323762	-0.103279	-0.105258	0.162044	-0.0817583	-0.069154
0.448	0.0371015	-0.101485	-0.102985	0.161237	-0.0803466	-0.0674085
0.449	0.041921	-0.0996526	-0.100537	0.159005	-0.0788496	-0.0654545
0.45	0.0467605	-0.097768	-0.0979706	0.155808	-0.0773532	-0.0633834
0.451	0.0515468	-0.0958915	-0.0954531	0.151995	-0.0759933	-0.0613774
0.452	0.0561555	-0.0940576	-0.093078	0.147758	-0.0747887	-0.0595678
0.453	0.0604968	-0.0922103	-0.0908789	0.143084	-0.0736162	-0.0580176
0.454	0.0646354	-0.0903166	-0.0889086	0.137787	-0.0724108	-0.0567614
0.455	0.0687587	-0.0885052	-0.0871582	0.131683	-0.0712111	-0.0558698
0.456	0.0730684	-0.0869528	-0.0854677	0.124828	-0.0700314	-0.0554516
0.457	0.0776133	-0.0855996	-0.0837204	0.11774	-0.068878	-0.0555143
0.458	0.0822492	-0.0841451	-0.0820094	0.111348	-0.0678441	-0.0559402
0.459	0.0868459	-0.0823252	-0.0804524	0.106658	-0.0670165	-0.056571
0.46	0.0913621	-0.0801538	-0.0790939	0.104522	-0.0663	-0.0572357
0.461	0.0957781	-0.0779428	-0.0779994	0.105484	-0.06552	-0.0577756
0.462	0.100264	-0.0760142	-0.0771824	0.109576	-0.0646582	-0.0580661
0.463	0.105229	-0.0744244	-0.0764544	0.116258	-0.0638614	-0.0580051
0.464	0.110957	-0.0730911	-0.0755724	0.124688	-0.0632766	-0.0575427
0.465	0.117403	-0.0719669	-0.0744888	0.134019	-0.0628893	-0.0567061
0.466	0.124329	-0.0709468	-0.0732712	0.143578	-0.062523	-0.0555391
0.467	0.131407	-0.0699183	-0.0719686	0.15305	-0.0619747	-0.0540737
0.468	0.138233	-0.0689349	-0.0706711	0.162409	-0.0610963	-0.0524344
0.469	0.144458	-0.068138	-0.0694816	0.17158	-0.0598222	-0.0508634
0.47	0.149923	-0.0676218	-0.0683573	0.180311	-0.0581669	-0.0495573
0.471	0.154574	-0.0674071	-0.0671265	0.188247	-0.056195	-0.0485416
0.472	0.158372	-0.0673546	-0.0657074	0.19494	-0.0539735	-0.0477107
0.473	0.161322	-0.0672073	-0.0641666	0.199937	-0.0515386	-0.0469881
0.474	0.163459	-0.0668002	-0.0625141	0.202994	-0.0490279	-0.0463685
0.475	0.1648	-0.0661011	-0.0605907	0.204279	-0.0467971	-0.0458126
0.476	0.165457	-0.0651337	-0.0583375	0.204312	-0.0452637	-0.0452337
0.477	0.165734	-0.0639211	-0.0560671	0.203631	-0.0446653	-0.0445171
0.478	0.165936	-0.0624372	-0.0542262	0.20264	-0.0449458	-0.0435264
0.479	0.166289	-0.0606688	-0.0530186	0.201739	-0.045825	-0.0422045
0.48	0.167005	-0.0587179	-0.0523552	0.201302	-0.0469456	-0.0406333
0.481	0.168137	-0.0567158	-0.0519976	0.201514	-0.0479298	-0.0389707
0.482	0.169579	-0.0547306	-0.0517345	0.202301	-0.0484576	-0.0373885
0.483	0.171279	-0.0528641	-0.0514098	0.203385	-0.0484118	-0.0359743
0.484	0.173288	-0.0512756	-0.0508935	0.20447	-0.0478748	-0.0347002
0.485	0.175722	-0.0500415	-0.0501985	0.205394	-0.0469654	-0.0335729
0.486	0.17871	-0.0490876	-0.0494569	0.206076	-0.0457481	-0.0326835
0.487	0.182212	-0.0482626	-0.0487993	0.206352	-0.0443379	-0.0321135
0.488	0.185996	-0.0474323	-0.0483213	0.205977	-0.0429284	-0.0319612
0.489	0.189903	-0.0465492	-0.0479942	0.204825	-0.0416223	-0.0323554
0.49	0.193938	-0.0456413	-0.0477086	0.202993	-0.0404054	-0.0332672
0.491	0.198029	-0.0447294	-0.0474371	0.200685	-0.0393122	-0.0344386
0.492	0.202	-0.0438315	-0.0471952	0.198076	-0.0384622	-0.0355561
0.493	0.205812	-0.0429578	-0.04693	0.195317	-0.0379537	-0.0363896
0.494	0.209586	-0.0421009	-0.0465303	0.192614	-0.0378345	-0.0368618
0.495	0.213385	-0.0412748	-0.0458316	0.190175	-0.0380691	-0.0370207
0.496	0.217161	-0.0404721	-0.0446587	0.188061	-0.0384378	-0.0369122
0.497	0.22083	-0.0396529	-0.0430022	0.186337	-0.0386199	-0.03654
0.498	0.224297	-0.038817	-0.0410382	0.185316	-0.038414	-0.0359392
0.499	0.227486	-0.0380709	-0.0390028	0.185225	-0.0377885	-0.0352177
0.5	0.230412	-0.0375576	-0.0370894	0.185832	-0.0368161	-0.0345248
0.501	0.233205	-0.0372712	-0.0353625	0.186748	-0.0356785	-0.033978
0.502	0.23596	-0.0369998	-0.0338528	0.187695	-0.0346099	-0.0335923
0.503	0.238589	-0.0364946	-0.0326599	0.188447	-0.0336947	-0.0333518
0.504	0.240953	-0.0356776	-0.0318919	0.188848	-0.0328309	-0.0332635
0.505	0.243109	-0.0346311	-0.0315926	0.188833	-0.0319218	-0.0332241
0.506	0.24523	-0.0334835	-0.0316961	0.188436	-0.0309322	-0.0330179
0.507	0.247388	-0.0323803	-0.0320365	0.187836	-0.0298105	-0.03255
0.508	0.24954	-0.0314592	-0.0324121	0.187286	-0.0285032	-0.0319231
0.509	0.251704	-0.0307754	-0.0326871	0.186928	-0.0269703	-0.0312536
0.51	0.253922	-0.0302389	-0.0328669	0.186714	-0.0252052	-0.0305806
0.511	0.256098	-0.0296761	-0.0330144	0.18654	-0.0232505	-0.0298779
0.512	0.25802	-0.0290223	-0.0331089	0.186463	-0.0212035	-0.0290339
0.513	0.25961	-0.0283889	-0.0330813	0.18676	-0.0192608	-0.0278913
0.514	0.260985	-0.0278652	-0.0329381	0.187839	-0.0176097	-0.0263258
0.515	0.262216	-0.0273745	-0.0327235	0.190016	-0.0162824	-0.024328
0.516	0.263276	-0.0267278	-0.0323983	0.193304	-0.0152203	-0.022034
0.517	0.264161	-0.0257681	-0.0318052	0.197404	-0.0143959	-0.0196356
0.518	0.264767	-0.0245393	-0.0308033	0.201821	-0.0138187	-0.0172599
0.519	0.264823	-0.0232586	-0.0294626	0.205954	-0.0134255	-0.0149972
0.52	0.264151	-0.0221373	-0.0280039	0.209253	-0.0131157	-0.0129954
0.521	0.262948	-0.0212445	-0.0266278	0.211344	-0.0128535	-0.0113852
0.522	0.261644	-0.0204738	-0.0254766	0.212087	-0.012546	-0.01018
0.523	0.260497	-0.0197221	-0.0245817	0.211589	-0.0120385	-0.00927163
0.524	0.259558	-0.0190379	-0.0238574	0.210158	-0.0112841	-0.00846182
0.525	0.25895	-0.0184761	-0.0231929	0.208078	-0.0103526	-0.007621
0.526	0.258854	-0.0179958	-0.0225439	0.205459	-0.00937479	-0.00677404
0.527	0.259311	-0.0175681	-0.0219551	0.202347	-0.00843436	-0.00597311
0.528	0.260133	-0.0172248	-0.0214523	0.198807	-0.00747445	-0.00518819
0.529	0.261028	-0.0170125	-0.02092	0.194943	-0.00645277	-0.00430857
0.53	0.261798	-0.0169249	-0.0201912	0.190976	-0.00541206	-0.00324574
0.531	0.262304	-0.0169032	-0.0192573	0.187347	-0.00423192	-0.00202779
0.532	0.262269	-0.0169004	-0.0182112	0.184716	-0.00265445	-0.000788972
0.533	0.261268	-0.0168558	-0.0170934	0.183722	-0.000639935	0.000260683
0.534	0.259059	-0.0166993	-0.0159393	0.184744	0.00158681	0.000936734
0.535	0.255752	-0.0164347	-0.0148285	0.187777	0.00375212	0.00120896
0.536	0.251621	-0.0160956	-0.0138678	0.19231	0.00566842	0.00114633
0.537	0.24702	-0.0156811	-0.0131494	0.197408	0.00724355	0.000732438
0.538	0.242412	-0.0152213	-0.0127134	0.202257	0.00840097	-0.000220804
0.539	0.238255	-0.0148192	-0.0125499	0.206504	0.00902978	-0.00186266
0.54	0.234953	-0.0145794	-0.0125834	0.210023	0.00906855	-0.00404567
0.541	0.232811	-0.0144596	-0.0126469	0.212657	0.00858538	-0.00642012
0.542	0.231997	-0.014236	-0.0125242	0.214258	0.00772392	-0.00863416
0.543	0.232639	-0.0137419	-0.0120765	0.214745	0.00663156	-0.0103786
0.544	0.234751	-0.0129959	-0.0113209	0.214095	0.00542471	-0.0114784
0.545	0.238022	-0.011985	-0.0103627	0.212465	0.00419397	-0.0119685
0.546	0.241884	-0.0106287	-0.00929616	0.210248	0.00301928	-0.0119198
0.547	0.245827	-0.0089917	-0.00819983	0.20781	0.00201087	-0.0113254
0.548	0.249534	-0.00729124	-0.00715595	0.205339	0.00130957	-0.0102324
0.549	0.252728	-0.00568352	-0.00621435	0.202943	0.000943041	-0.00875444
0.55	0.255136	-0.00417674	-0.00539481	0.200727	0.000830284	-0.00703089
0.551	0.256657	-0.00283721	-0.0047178	0.198978	0.000940921	-0.00529756
0.552	0.257354	-0.00186009	-0.00411315	0.198206	0.00124088	-0.00379526
0.553	0.257328	-0.00133781	-0.00340011	0.198834	0.00162417	-0.00260413
0.554	0.256709	-0.00113373	-0.00248411	0.20097	0.00204012	-0.0016897
0.555	0.255748	-0.000970837	-0.0014742	0.204311	0.00252528	-0.00105816
0.556	0.254794	-0.000633506	-0.000567834	0.208005	0.00308956	-0.000722537
0.557	0.254086	-0.000119574	0.000115458	0.210898	0.00360744	-0.000532128
0.558	0.253603	0.000451472	0.000574316	0.212348	0.00386976	-0.000240204
0.559	0.253247	0.00103204	0.000853473	0.212695	0.00383053	0.000227138
0.56	0.252988	0.00173713	0.000998173	0.212759	0.00368773	0.000719668
0.561	0.252683	0.00273879	0.00106941	0.213192	0.00365999	0.00113156
0.562	0.252049	0.00409123	0.00113374	0.214274	0.00374907	0.00155551
0.563	0.250913	0.00572985	0.00124446	0.215951	0.00374242	0.00217339
0.564	0.249365	0.00745882	0.00144328	0.217967	0.00344031	0.00309688
0.565	0.2476	0.00895182	0.00172852	0.220107	0.00281653	0.00425264
0.566	0.245737	0.00992534	0.00204409	0.222399	0.00198141	0.00549185
0.567	0.243866	0.0102834	0.00241151	0.224942	0.00111905	0.00673966
0.568	0.242138	0.0101677	0.00299288	0.227599	0.000450755	0.00792985
0.569	0.24082	0.00985677	0.00387275	0.230038	0.000164841	0.00899257
0.57	0.240267	0.00955826	0.00493945	0.231931	0.000375667	0.00990537
0.571	0.240731	0.00934722	0.00601351	0.233126	0.00115346	0.010611
0.572	0.242248	0.00924194	0.00696617	0.233736	0.00251128	0.0110058
0.573	0.244736	0.00925879	0.00776379	0.234054	0.00430581	0.0110929
0.574	0.248104	0.00943026	0.0083872	0.234374	0.00623845	0.0110171
0.575	0.252166	0.00978202	0.0087466	0.23483	0.00803523	0.0109123
0.576	0.25656	0.0103027	0.00876241	0.235376	0.00957871	0.0108265
0.577	0.260827	0.0109255	0.00847883	0.235921	0.0108306	0.0107366
0.578	0.264559	0.0115682	0.00809554	0.236414	0.0117402	0.0106073
0.579	0.267502	0.0122398	0.00791096	0.236788	0.0122835	0.0105314
0.58	0.269437	0.0129918	0.00809091	0.236919	0.0125286	0.0106894
0.581	0.270088	0.0137792	0.00850413	0.236664	0.0126093	0.0111939
0.582	0.269325	0.0145034	0.0089401	0.235876	0.012591	0.0120243
0.583	0.267318	0.0151662	0.00934746	0.234415	0.0124707	0.0129808
0.584	0.26437	0.0158688	0.00979299	0.232276	0.0123039	0.013822
0.585	0.260725	0.0166654	0.0103226	0.229627	0.0121599	0.0144339
0.586	0.256582	0.0175241	0.0108965	0.226717	0.0120498	0.0147912
0.587	0.252226	0.0183924	0.0114557	0.223821	0.0119777	0.0148878
0.588	0.248001	0.0192209	0.0120059	0.221155	0.0119496	0.0146758
0.589	0.244142	0.0199658	0.0125128	0.218854	0.0119671	0.014099
0.59	0.240767	0.0206124	0.0128265	0.217107	0.0119951	0.013197
0.591	0.237969	0.021192	0.0128937	0.216197	0.0119646	0.0120708
0.592	0.23578	0.021772	0.0127913	0.216376	0.0118736	0.0108449
0.593	0.234219	0.0224488	0.0125818	0.217728	0.0118012	0.0096941
0.594	0.233384	0.0232818	0.0123658	0.220034	0.0118517	0.00881646
0.595	0.233493	0.0241846	0.0122064	0.222845	0.0120626	0.00837107
0.596	0.234861	0.0249518	0.0120299	0.225781	0.0123721	0.00839465
0.597	0.237759	0.0253342	0.011844	0.228613	0.0127379	0.00880235
0.598	0.242347	0.0251389	0.0118135	0.231083	0.0131695	0.00945088
0.599	0.248664	0.0243863	0.0120501	0.232962	0.0136234	0.0101353
0.6	0.256577	0.0233053	0.0125645	0.23421	0.0140038	0.0106187
0.601	0.265766	0.0222236	0.0132944	0.234925	0.014239	0.0106913
0.602	0.275733	0.0214367	0.0141054	0.235231	0.0143378	0.0102065
0.603	0.285795	0.021051	0.0149441	0.235266	0.0143987	0.00916541
0.604	0.295161	0.0209782	0.0158515	0.235276	0.0144853	0.00778576
0.605	0.303126	0.0211048	0.0167524	0.235566	0.0145851	0.00641246
0.606	0.309229	0.0214405	0.0174834	0.236281	0.0147355	0.00539662
0.607	0.313254	0.0220541	0.0179379	0.237361	0.0150458	0.0050075
0.608	0.315168	0.0229268	0.0180228	0.238701	0.0155749	0.00525382
0.609	0.315074	0.0239936	0.0177257	0.240228	0.0162533	0.0058975
0.61	0.313168	0.0252426	0.0172532	0.241832	0.0169086	0.00669536
0.611	0.309782	0.0266474	0.0169235	0.243387	0.0173444	0.00750458
0.612	0.305343	0.0280811	0.0169126	0.244794	0.0174834	0.00822149
0.613	0.300328	0.029347	0.0171793	0.245925	0.0173911	0.00874983
0.614	0.29524	0.0301932	0.0176617	0.246603	0.0171655	0.0090737
0.615	0.290526	0.0304193	0.0183346	0.246807	0.016974	0.00929331
0.616	0.286589	0.0300709	0.019062	0.246939	0.0170829	0.00954479
0.617	0.283709	0.0293648	0.019681	0.247677	0.0176868	0.00984243
0.618	0.281866	0.0284958	0.0201532	0.249445	0.0187384	0.0100293
0.619	0.280837	0.0275873	0.0204262	0.252179	0.0199838	0.00987757
0.62	0.280353	0.0267242	0.0203488	0.255628	0.0211959	0.00915253
0.621	0.280064	0.0259765	0.0198453	0.259734	0.0223264	0.00772382
0.622	0.279637	0.0253205	0.0189814	0.264593	0.0234191	0.00565741
0.623	0.279066	0.0246948	0.0178569	0.270078	0.0243371	0.00316287
0.624	0.278546	0.0241397	0.0165382	0.275714	0.024703	0.00054111
0.625	0.278011	0.0237321	0.0151173	0.280939	0.0242972	-0.00186275
0.626	0.277216	0.0235537	0.0138266	0.285277	0.023264	-0.00368735
0.627	0.276085	0.023688	0.0129498	0.288395	0.0219105	-0.00455465
0.628	0.274762	0.0240898	0.0125912	0.290274	0.0205226	-0.00415092
0.629	0.273495	0.0245603	0.012634	0.291248	0.0193225	-0.00235329
0.63	0.272524	0.0248703	0.0128873	0.291739	0.0185233	0.000685092
0.631	0.272132	0.0248644	0.0132372	0.291947	0.0183542	0.004538
0.632	0.272621	0.0244839	0.0136648	0.291817	0.0189079	0.00861337
0.633	0.274078	0.0237534	0.014173	0.291283	0.0199682	0.012324
0.634	0.27622	0.0228054	0.0147185	0.290344	0.0212019	0.01528
0.635	0.27852	0.0218319	0.0152161	0.288926	0.0224239	0.0173772
0.636	0.280531	0.0209906	0.0156341	0.286939	0.0235127	0.0186569
0.637	0.282027	0.0204409	0.0159786	0.284326	0.024352	0.019133
0.638	0.282881	0.0203297	0.0162255	0.281077	0.0248904	0.01884
0.639	0.282926	0.020697	0.0163543	0.277377	0.0250881	0.0179104
0.64	0.28203	0.0214433	0.0163895	0.273531	0.0248766	0.0165258
0.641	0.280308	0.022314	0.0163963	0.269548	0.024165	0.0149168
0.642	0.278052	0.022982	0.0164243	0.264936	0.0229299	0.0133364
0.643	0.275458	0.0232921	0.0164557	0.258929	0.0213244	0.0119264
0.644	0.27254	0.0234025	0.0163987	0.250816	0.0196575	0.010731
0.645	0.269295	0.0235543	0.0161879	0.240212	0.0183065	0.00983923
0.646	0.265834	0.0237969	0.0159364	0.227197	0.0174649	0.00932979
0.647	0.262235	0.0240387	0.0158223	0.212243	0.0169795	0.00909777
0.648	0.258484	0.0242552	0.0158621	0.196085	0.0166729	0.00890027
0.649	0.254766	0.0245093	0.0159577	0.179528	0.0166038	0.0086006
0.65	0.251516	0.0247975	0.0161101	0.163221	0.0168652	0.00831657
0.651	0.248988	0.0250699	0.0164305	0.147499	0.0174486	0.00831843
0.652	0.247103	0.0253215	0.0169442	0.132486	0.0182998	0.00882953
0.653	0.245788	0.0255615	0.017575	0.118482	0.0192679	0.00994361
0.654	0.245089	0.0257759	0.0182484	0.106309	0.020142	0.0115923
0.655	0.244857	0.0258709	0.018859	0.0975715	0.0208133	0.013522
0.656	0.244713	0.0257217	0.0192526	0.0945993	0.0212948	0.0153858
0.657	0.244431	0.025354	0.0192753	0.0996108	0.021667	0.0168652
0.658	0.244024	0.0250184	0.0188647	0.113595	0.0219565	0.0177453
0.659	0.243509	0.0250072	0.0181151	0.135731	0.0220787	0.0179465
0.66	0.242828	0.0253656	0.0172242	0.163684	0.022023	0.0175538
0.661	0.241844	0.0259416	0.0163889	0.194355	0.0218791	0.0168457
0.662	0.240321	0.0265858	0.0157738	0.224439	0.0216658	0.0161103
0.663	0.238035	0.0271834	0.0155395	0.250831	0.0213371	0.0154517
0.664	0.234978	0.0276695	0.0158069	0.27107	0.0209435	0.0149633
0.665	0.231465	0.0280059	0.0165776	0.283739	0.020681	0.014879
0.666	0.227924	0.0281773	0.0176633	0.288537	0.0207311	0.0153481
0.667	0.224483	0.0282086	0.0188003	0.285967	0.0211285	0.0162576
0.668	0.220972	0.0281608	0.0197815	0.2771	0.0218024	0.0173635
0.669	0.217353	0.0281075	0.0204473	0.263353	0.0226659	0.0184618
0.67	0.213846	0.0280641	0.0207693	0.246123	0.0236457	0.0194157
0.671	0.210571	0.0280311	0.0208818	0.226661	0.0247051	0.0201499
0.672	0.207357	0.0280487	0.0209524	0.206187	0.0258075	0.0206736
0.673	0.204017	0.0281681	0.0210481	0.185867	0.0267842	0.0210747
0.674	0.20061	0.0284404	0.0211032	0.166691	0.0273659	0.0215067
0.675	0.197343	0.0288846	0.0210241	0.149406	0.0274051	0.0220666
0.676	0.194306	0.0295141	0.0208547	0.134546	0.0269803	0.0225987
0.677	0.191431	0.0303778	0.0207674	0.122461	0.0263126	0.0228675
0.678	0.18866	0.0313872	0.0208376	0.113305	0.0256123	0.0229578
0.679	0.186093	0.032253	0.0209347	0.106973	0.0249419	0.0232396
0.68	0.183973	0.0327354	0.0208802	0.103032	0.0242684	0.0238957
0.681	0.182485	0.0327475	0.0207113	0.100868	0.0236052	0.0247105
0.682	0.181675	0.0323246	0.0206889	0.0999326	0.0229918	0.0253738
0.683	0.181501	0.0316645	0.0209767	0.0997456	0.0224678	0.0257442
0.684	0.181857	0.0309828	0.0215322	0.0999106	0.0220508	0.0257698
0.685	0.182598	0.0303536	0.0222581	0.100191	0.0216419	0.0253249
0.686	0.183545	0.0298202	0.0230699	0.100444	0.021075	0.0243316
0.687	0.184473	0.0294237	0.0239331	0.1006	0.0202926	0.0230077
0.688	0.185225	0.0290916	0.0248577	0.100688	0.0194256	0.0216994
0.689	0.185795	0.0287698	0.0257972	0.100736	0.0187046	0.020527
0.69	0.186188	0.028594	0.0265701	0.100797	0.0183155	0.0193786
0.691	0.186304	0.0287245	0.0269662	0.101083	0.0182848	0.0181738
0.692	0.186068	0.0291505	0.0269855	0.101853	0.0184867	0.017005
0.693	0.185548	0.0297242	0.0268665	0.1032	0.0188107	0.0160435
0.694	0.18469	0.0302783	0.0268758	0.105033	0.0191814	0.0154298
0.695	0.183296	0.0307729	0.0271488	0.107227	0.0194739	0.015188
0.696	0.181422	0.0312457	0.0276343	0.109627	0.0196068	0.0152011
0.697	0.179396	0.0316686	0.0281693	0.111921	0.0195738	0.015365
0.698	0.177482	0.0320157	0.0286517	0.113718	0.0193871	0.015685
0.699	0.175723	0.0323016	0.0290784	0.114717	0.0191451	0.0161762
0.7	0.174063	0.0325319	0.0294601	0.114707	0.0189718	0.0167566
0.701	0.172642	0.03273	0.029796	0.113605	0.0188803	0.0173204
0.702	0.171736	0.032949	0.0301138	0.111488	0.0188574	0.0178446
0.703	0.171331	0.0332128	0.03046	0.108503	0.0189244	0.0183582
0.704	0.17109	0.0335109	0.0308476	0.104875	0.0190605	0.0188846
0.705	0.170815	0.0338889	0.0312025	0.100963	0.0191792	0.0193337
0.706	0.170623	0.0344661	0.0313927	0.0971172	0.0191531	0.0194915
0.707	0.17053	0.0353137	0.0313328	0.0936041	0.0189123	0.0191947
0.708	0.170299	0.0363875	0.0309715	0.0906834	0.0185684	0.0183915
0.709	0.169821	0.0376162	0.0302681	0.0885697	0.0183027	0.0171964
0.71	0.169239	0.0389641	0.0292926	0.0874282	0.0181479	0.0159577
0.711	0.168683	0.0403722	0.0282525	0.0873861	0.0180843	0.0150321
0.712	0.168198	0.0416945	0.0273389	0.0884527	0.0181534	0.014485
0.713	0.167877	0.0427421	0.0265839	0.0905398	0.0183688	0.0141321
0.714	0.167886	0.0434233	0.0259341	0.0934921	0.0187537	0.0138832
0.715	0.168375	0.0437932	0.025436	0.0970383	0.0193219	0.0138629
0.716	0.169366	0.0439367	0.0252344	0.100849	0.0200169	0.0141552
0.717	0.170625	0.0438632	0.0254526	0.104675	0.0208421	0.0147336
0.718	0.171822	0.0435313	0.0261239	0.10836	0.0218658	0.0155877
0.719	0.172822	0.0429393	0.0271192	0.111745	0.0230629	0.0166769
0.72	0.173555	0.0421276	0.028233	0.114612	0.0242655	0.0178784
0.721	0.173867	0.0411663	0.0293289	0.116748	0.0252781	0.0190174
0.722	0.173692	0.0402162	0.0302818	0.118073	0.0260025	0.0199276
0.723	0.173061	0.0394759	0.0309964	0.118779	0.0264306	0.0205154
0.724	0.172049	0.0390286	0.0314599	0.119302	0.0266474	0.0207425
0.725	0.170839	0.0387827	0.0316145	0.120047	0.0268209	0.0206501
0.726	0.16964	0.038568	0.0313753	0.121113	0.0270279	0.0203905
0.727	0.168545	0.0383023	0.0307817	0.12229	0.027189	0.0201322
0.728	0.167515	0.038036	0.0299677	0.123282	0.0272016	0.0200151
0.729	0.166522	0.0379131	0.0290903	0.123832	0.0270088	0.0201563
0.73	0.16565	0.0380823	0.0282912	0.123645	0.0266494	0.0205542
0.731	0.164957	0.0385571	0.0276283	0.122432	0.0262928	0.0210385
0.732	0.164389	0.0392373	0.0270662	0.120133	0.0261037	0.0213925
0.733	0.163908	0.0400039	0.0265748	0.116962	0.0261293	0.0214991
0.734	0.163567	0.0407235	0.0262284	0.113182	0.0263911	0.0214007
0.735	0.163435	0.0412411	0.02614	0.108919	0.0269732	0.0212089
0.736	0.163453	0.041408	0.0263517	0.104265	0.0278934	0.0209409
0.737	0.163476	0.0411591	0.0267409	0.0994005	0.0289502	0.020545
0.738	0.163516	0.0405695	0.0270137	0.0945841	0.029831	0.0200716
0.739	0.163715	0.0398533	0.026964	0.090177	0.0303691	0.0196873
0.74	0.164086	0.039254	0.0266265	0.0865623	0.0306093	0.0195292
0.741	0.164523	0.0388698	0.0261475	0.0839948	0.0306061	0.0196434
0.742	0.164947	0.0386774	0.0256166	0.0826244	0.0303737	0.0199708
0.743	0.165352	0.0386654	0.0250083	0.0825378	0.0299778	0.0203182
0.744	0.165835	0.0387886	0.0243301	0.0837652	0.0294515	0.020487
0.745	0.166478	0.0389024	0.0237255	0.0862464	0.0287831	0.0204065
0.746	0.167236	0.0388546	0.0233118	0.0896858	0.0280526	0.0200524
0.747	0.168064	0.0385723	0.0230948	0.0935659	0.0274684	0.0194532
0.748	0.169025	0.038066	0.0231114	0.097377	0.027279	0.0188223
0.749	0.170186	0.0374312	0.0234527	0.100684	0.0275938	0.0184953
0.75	0.171441	0.036795	0.0241636	0.103077	0.0283218	0.0187687
0.751	0.172557	0.0362326	0.0251942	0.104302	0.0293346	0.0197315
0.752	0.173313	0.0357356	0.0264178	0.104367	0.0304873	0.0211717
0.753	0.173639	0.0352133	0.0277163	0.103436	0.0316092	0.022746
0.754	0.173641	0.0346037	0.0289608	0.101678	0.0326578	0.0241691
0.755	0.173375	0.0339734	0.0299392	0.0992388	0.0336255	0.0252543
0.756	0.17274	0.033475	0.0304855	0.0962778	0.0343455	0.0259561
0.757	0.171685	0.0332757	0.0305975	0.0930376	0.0346459	0.0263668
0.758	0.170272	0.0334584	0.0303116	0.0898337	0.0345292	0.0266243
0.759	0.16856	0.0340373	0.0296076	0.0868961	0.0340483	0.0268315
0.76	0.166532	0.0351045	0.0285365	0.0843977	0.0332141	0.0270228
0.761	0.164243	0.036707	0.0273584	0.082518	0.0320733	0.0271923
0.762	0.162002	0.0386719	0.0264307	0.0812646	0.0307668	0.027284
0.763	0.160175	0.0407206	0.0259462	0.0804496	0.0294958	0.0271805
0.764	0.158821	0.0425684	0.025907	0.0799254	0.0284587	0.0268592
0.765	0.157775	0.0439817	0.0262481	0.0796455	0.0278495	0.026474
0.766	0.15689	0.0448435	0.02682	0.0795108	0.0278201	0.0261872
0.767	0.156078	0.0451163	0.0274473	0.0794704	0.0283444	0.0260563
0.768	0.15521	0.0447979	0.0280184	0.0796519	0.0291777	0.0261346
0.769	0.15419	0.0439373	0.0284532	0.0801035	0.0300513	0.0265312
0.77	0.153046	0.0426647	0.0287104	0.0806934	0.030826	0.0272335
0.771	0.151768	0.0411897	0.0287967	0.0813561	0.0314454	0.0280556
0.772	0.150262	0.0397593	0.0287665	0.0821496	0.0319156	0.0288411
0.773	0.148522	0.0385541	0.0286945	0.0831057	0.0322415	0.0294825
0.774	0.146698	0.0376309	0.0285947	0.0841862	0.0323232	0.0298386
0.775	0.144938	0.0369664	0.0284066	0.0853289	0.0320871	0.0297388
0.776	0.143271	0.0364105	0.0280996	0.08644	0.0316122	0.0290786
0.777	0.141695	0.0357378	0.0277433	0.0873743	0.0310171	0.0279524
0.778	0.140167	0.0349445	0.0274044	0.0880049	0.0303949	0.0266137
0.779	0.138581	0.0342071	0.0271239	0.088239	0.0298317	0.0254048
0.78	0.136927	0.0335998	0.0270626	0.0879903	0.0293636	0.0246182
0.781	0.135294	0.0331547	0.0273924	0.0873206	0.028982	0.0243373
0.782	0.133772	0.0329181	0.0280409	0.0864792	0.0287017	0.0244971
0.783	0.132529	0.0328292	0.0287713	0.0857335	0.0285124	0.0249739
0.784	0.131804	0.0327602	0.0294446	0.0852931	0.0282861	0.0257183
0.785	0.131705	0.0326495	0.0300377	0.0852053	0.027906	0.0267467
0.786	0.132082	0.0325648	0.030495	0.0852983	0.0274096	0.0279282
0.787	0.132611	0.0326033	0.0307835	0.0854506	0.0269548	0.0290343
0.788	0.133029	0.0327143	0.0310086	0.0857485	0.0267229	0.0298762
0.789	0.133276	0.0327921	0.031289	0.0862887	0.0267672	0.0303475
0.79	0.13345	0.0329159	0.0315925	0.0870667	0.0269966	0.0304895
0.791	0.13365	0.0332962	0.0317849	0.0880556	0.0272843	0.0303804
0.792	0.133892	0.0339682	0.0317979	0.0892675	0.0274746	0.0299537
0.793	0.134231	0.0347444	0.031641	0.090728	0.0274119	0.0290832
0.794	0.134776	0.0355337	0.0313239	0.0923612	0.0271009	0.0277999
0.795	0.13553	0.0364409	0.030936	0.0938997	0.0266991	0.026287
0.796	0.136452	0.0374961	0.0306245	0.0949934	0.026264	0.0247634
0.797	0.137575	0.0385822	0.0303689	0.0954464	0.0257445	0.0234785
0.798	0.138903	0.039615	0.0300567	0.0952821	0.0251335	0.0226102
0.799	0.140366	0.0405365	0.0297909	0.0946331	0.0244534	0.0221549
0.8	0.141927	0.0412653	0.0297884	0.0936984	0.0237709	0.0220688
0.801	0.14354	0.0417708	0.0300888	0.0927474	0.0231672	0.0223069
0.802	0.145028	0.0420809	0.0305765	0.0920918	0.0226962	0.0226704
0.803	0.146188	0.0421928	0.0310946	0.0919907	0.022435	0.0229471
0.804	0.147002	0.0420625	0.0314733	0.092521	0.0224283	0.0231142
0.805	0.147562	0.0417468	0.0315841	0.093578	0.0226434	0.0231779
0.806	0.147825	0.0414298	0.0313702	0.0950326	0.0230283	0.0230468
0.807	0.147653	0.0412541	0.0308501	0.0968692	0.0235307	0.0226943
0.808	0.147036	0.0412694	0.0301497	0.0990925	0.0241175	0.0222069
0.809	0.146146	0.041598	0.0294133	0.101516	0.0247978	0.0216971
0.81	0.145214	0.04234	0.0286993	0.103755	0.0255812	0.0213394
0.811	0.144311	0.0433132	0.0281038	0.1055	0.026393	0.021336
0.812	0.143338	0.0442785	0.0278234	0.106756	0.0271114	0.0217951
0.813	0.142315	0.0451942	0.0280192	0.107666	0.027749	0.0227085
0.814	0.141456	0.045972	0.0287266	0.108295	0.0284193	0.02396
0.815	0.140917	0.0463366	0.0298605	0.108682	0.0291147	0.0253502
0.816	0.140718	0.0460964	0.0312846	0.108839	0.0296862	0.0266928
0.817	0.140875	0.0452919	0.032869	0.108728	0.0300062	0.0279006
0.818	0.141346	0.0440986	0.0344861	0.10834	0.0300887	0.0289805
0.819	0.141834	0.0427524	0.0359487	0.107704	0.0300747	0.0300093
0.82	0.141945	0.0415049	0.0369927	0.106825	0.0300857	0.0310959
0.821	0.141547	0.0405163	0.037436	0.105673	0.0301494	0.0322764
0.822	0.140749	0.0397936	0.0372671	0.104261	0.0303424	0.0334228
0.823	0.139591	0.0393178	0.0365441	0.102661	0.0308051	0.0343048
0.824	0.138026	0.039108	0.0353637	0.100945	0.0315321	0.0348225
0.825	0.136198	0.0391472	0.0339032	0.0991162	0.032383	0.0350297
0.826	0.134465	0.0393551	0.0324024	0.0971576	0.0332946	0.0349519
0.827	0.133137	0.0396463	0.0310955	0.0951576	0.0343039	0.0346277
0.828	0.132428	0.0400279	0.0301447	0.0933072	0.0354196	0.0341556
0.829	0.132581	0.0404861	0.0295918	0.091801	0.0365768	0.0335744
0.83	0.133739	0.0408413	0.0293553	0.0906572	0.037664	0.0329256
0.831	0.135767	0.0408929	0.0293549	0.0896673	0.0385546	0.0323958
0.832	0.13832	0.0405478	0.0295861	0.0886379	0.0391944	0.032217
0.833	0.140978	0.0398109	0.0300543	0.0874951	0.0396179	0.0324696
0.834	0.143377	0.0387951	0.0307452	0.0861345	0.03987	0.0330474
0.835	0.145219	0.0377397	0.0315317	0.0844282	0.0400364	0.0337813
0.836	0.146231	0.0369387	0.032119	0.0824057	0.0401813	0.0346023
0.837	0.146314	0.03654	0.0322602	0.0802903	0.0402056	0.0355316
0.838	0.145649	0.0364924	0.0319659	0.078325	0.0399577	0.0364667
0.839	0.144529	0.0367299	0.0314879	0.0766202	0.0394068	0.0371645
0.84	0.143123	0.0371956	0.0311107	0.0751616	0.0386049	0.0374636
0.841	0.141443	0.0376772	0.0309142	0.073931	0.0376358	0.0373652
0.842	0.13951	0.0379416	0.030792	0.073057	0.0366776	0.0369668
0.843	0.137452	0.038028	0.0306471	0.0727019	0.0358793	0.0364066
0.844	0.135346	0.0381604	0.0304969	0.0728166	0.0351617	0.0357968
0.845	0.133177	0.0384595	0.0304769	0.0731796	0.0343595	0.0351771
0.846	0.131104	0.038894	0.0307196	0.0735835	0.0334294	0.0345625
0.847	0.129493	0.0393927	0.0311731	0.0739433	0.0324426	0.0339668
0.848	0.128526	0.0399015	0.0316455	0.0742928	0.0315338	0.0333645
0.849	0.127979	0.0403451	0.0319878	0.0747467	0.0308593	0.0327237
0.85	0.127525	0.0405379	0.0321305	0.0754372	0.03056	0.032099
0.851	0.127027	0.0402519	0.0320453	0.0763908	0.0307522	0.0316649
0.852	0.126422	0.0394219	0.0317794	0.0775045	0.0314345	0.0315611
0.853	0.125666	0.0382279	0.031466	0.0786322	0.0323507	0.0316871
0.854	0.124941	0.0369604	0.0311934	0.079631	0.0330939	0.0317857
0.855	0.124581	0.0357912	0.0309502	0.0803562	0.0334757	0.031725
0.856	0.124679	0.0347849	0.0306878	0.0806552	0.0336465	0.0316056
0.857	0.12499	0.0340364	0.0302782	0.0803974	0.0338285	0.0315949
0.858	0.125191	0.0336303	0.0296494	0.0795242	0.0341457	0.031775
0.859	0.125193	0.0336416	0.0290066	0.078141	0.0346125	0.0321154
0.86	0.125176	0.0341421	0.0286198	0.076626	0.0351943	0.0324707
0.861	0.125259	0.0350519	0.0285998	0.0753997	0.0359289	0.0327164
0.862	0.1253	0.0361747	0.0289526	0.0745238	0.0368615	0.0328764
0.863	0.125243	0.0373993	0.0295495	0.0738086	0.0379159	0.0330416
0.864	0.125278	0.0386281	0.0302049	0.073137	0.0389779	0.0332521
0.865	0.125439	0.0396583	0.0308338	0.0725192	0.0399606	0.0334738
0.866	0.125466	0.0403663	0.0313397	0.0720636	0.0407987	0.0337117
0.867	0.12513	0.0407727	0.0316314	0.0719311	0.0414609	0.0341008
0.868	0.124451	0.0408529	0.0317824	0.0721964	0.0419355	0.0347833
0.869	0.123633	0.0405881	0.0318842	0.0727729	0.0422561	0.0357686
0.87	0.122845	0.0400837	0.0319306	0.0735002	0.0424504	0.0369645
0.871	0.122067	0.0394287	0.0319247	0.0742041	0.0424902	0.0382255
0.872	0.121221	0.0386358	0.0318901	0.0746901	0.0423547	0.0393141
0.873	0.120311	0.0377782	0.0317998	0.0747916	0.0419966	0.0400245
0.874	0.119314	0.0370564	0.0315899	0.0744953	0.0413332	0.0403962
0.875	0.11821	0.0367269	0.0312178	0.0739542	0.0403475	0.0405684
0.876	0.117173	0.0369548	0.030673	0.0733028	0.039093	0.0404905
0.877	0.11648	0.0376626	0.0300153	0.0726167	0.0376708	0.0400195
0.878	0.116205	0.0385839	0.0294177	0.0720083	0.0362717	0.0391213
0.879	0.116213	0.0394568	0.0291293	0.0715338	0.0351003	0.0377453
0.88	0.116397	0.0401133	0.0293735	0.0711385	0.0342729	0.0357873
0.881	0.11678	0.0405335	0.0301582	0.0708176	0.0338871	0.0332899
0.882	0.117381	0.0408285	0.0312341	0.0705992	0.0339958	0.0304065
0.883	0.118148	0.0410971	0.0323086	0.070423	0.0344179	0.0273042
0.884	0.119046	0.0413189	0.0331862	0.0701815	0.0348091	0.0242177
0.885	0.120062	0.04144	0.0338247	0.0697249	0.0349814	0.0214263
0.886	0.121136	0.0415089	0.0343298	0.0689095	0.0349931	0.0192031
0.887	0.12222	0.0415754	0.0347749	0.0677005	0.0349263	0.0177129
0.888	0.123279	0.0415576	0.0351491	0.0661123	0.0347112	0.0169346
0.889	0.124222	0.0413425	0.0354325	0.0642259	0.0342027	0.016768
0.89	0.124929	0.0409311	0.0356018	0.0622788	0.0333934	0.0171257
0.891	0.125427	0.040456	0.0356672	0.060488	0.0324494	0.0178784
0.892	0.125893	0.0400774	0.0356723	0.0589116	0.0314623	0.0188053
0.893	0.126377	0.0398948	0.0356596	0.0575476	0.0303914	0.0197625
0.894	0.126728	0.0399574	0.0356541	0.0563869	0.0292879	0.0207986
0.895	0.126808	0.0402754	0.0356169	0.0554057	0.0282683	0.021949
0.896	0.12668	0.0407976	0.0354732	0.0545383	0.0273736	0.0230945
0.897	0.12652	0.0414424	0.0351861	0.0537653	0.0266516	0.0241088
0.898	0.126339	0.042146	0.0347472	0.0532296	0.0261916	0.0249892
0.899	0.126094	0.0428353	0.0342049	0.0530169	0.0260124	0.0257575
0.9	0.125952	0.0434243	0.033711	0.052972	0.0260131	0.0263636
0.901	0.126139	0.0438116	0.0334437	0.0529352	0.0260455	0.0267261
0.902	0.126682	0.0439062	0.0334844	0.0529358	0.0259628	0.0268147
0.903	0.127384	0.0436968	0.0337786	0.0531284	0.0256713	0.0267185
0.904	0.127921	0.0432122	0.0342268	0.0536275	0.0252372	0.0265711
0.905	0.128024	0.0425014	0.0347485	0.0543416	0.0248358	0.026465
0.906	0.127624	0.0416741	0.0352532	0.0550397	0.0246057	0.0264499
0.907	0.126824	0.040894	0.0356684	0.0555704	0.0246106	0.0264667
0.908	0.125803	0.040293	0.0359138	0.0559886	0.0248524	0.0264162
0.909	0.124802	0.039931	0.0358603	0.0564954	0.0252945	0.0263114
0.91	0.124063	0.0398421	0.0354847	0.0571813	0.0258952	0.0261986
0.911	0.123659	0.039991	0.0349557	0.0579547	0.0266005	0.0260985
0.912	0.123514	0.0403052	0.0345255	0.0587521	0.0273069	0.0260636
0.913	0.123559	0.0407274	0.0343617	0.059529	0.0279097	0.0261396
0.914	0.123713	0.0410848	0.0344069	0.0601429	0.0284454	0.0263635
0.915	0.123846	0.0411713	0.0344649	0.0605038	0.0290186	0.0267744
0.916	0.123815	0.0410042	0.0343727	0.0606633	0.0295671	0.027336
0.917	0.12361	0.0407044	0.0340143	0.0607092	0.0299781	0.0279737
0.918	0.123384	0.0403133	0.033387	0.0607432	0.0303632	0.0286485
0.919	0.12316	0.0398927	0.032684	0.0608532	0.0309533	0.0293078
0.92	0.122799	0.0395186	0.0321049	0.0609738	0.0318303	0.0298295
0.921	0.122358	0.0391601	0.031616	0.0608923	0.0328861	0.0300847
0.922	0.122062	0.0387111	0.0309917	0.0605246	0.0339263	0.0300201
0.923	0.121882	0.0381301	0.0300709	0.0600761	0.0347736	0.029652
0.924	0.121527	0.0374857	0.0289732	0.0598401	0.0353733	0.0291011
0.925	0.120899	0.0368744	0.0280367	0.0599787	0.0357673	0.0285949
0.926	0.120231	0.0363982	0.0275633	0.0604582	0.0359783	0.0283633
0.927	0.119742	0.0361484	0.0276951	0.0610817	0.0360011	0.0285745
0.928	0.119368	0.0361895	0.0283828	0.0616551	0.0358466	0.0293015
0.929	0.118914	0.0365561	0.0294093	0.0621129	0.035574	0.0304783
0.93	0.118391	0.0371591	0.0305493	0.0624771	0.0352667	0.0318821
0.931	0.118027	0.0378017	0.0316298	0.0628114	0.0349955	0.0332095
0.932	0.117913	0.0383332	0.0325383	0.063205	0.0348105	0.0342452
0.933	0.117951	0.0387202	0.0332723	0.0636109	0.0347091	0.0349492
0.934	0.118072	0.0390111	0.0338777	0.0637603	0.0347252	0.0354244
0.935	0.118201	0.0392745	0.0344005	0.0634231	0.0349269	0.0358341
0.936	0.118191	0.0396223	0.0349566	0.0626463	0.0352325	0.036272
0.937	0.118012	0.0401645	0.0356827	0.0616541	0.035507	0.0366962
0.938	0.117778	0.0408877	0.0365635	0.0606141	0.0357392	0.0369401
0.939	0.117529	0.0417364	0.0374502	0.0595241	0.0360048	0.0368117
0.94	0.117183	0.0426812	0.0381904	0.0583301	0.0363296	0.0362546
0.941	0.116642	0.0436605	0.0386282	0.0571263	0.0365532	0.0353539
0.942	0.115924	0.0446143	0.0386261	0.0561435	0.0364509	0.0342737
0.943	0.11522	0.045455	0.0381336	0.05556	0.0360011	0.0332539
0.944	0.114687	0.0460653	0.0371939	0.0554271	0.0354344	0.0325116
0.945	0.114341	0.0464182	0.0359711	0.0557325	0.0349723	0.0321089
0.946	0.114272	0.046559	0.0347446	0.0563779	0.034626	0.0319831
0.947	0.114673	0.0465409	0.0337842	0.0572131	0.0343681	0.0320667
0.948	0.11556	0.0463659	0.0332015	0.0581541	0.0342296	0.0323378
0.949	0.116634	0.0459867	0.032952	0.0590903	0.0341885	0.0327274
0.95	0.117488	0.045451	0.0329803	0.0598386	0.0342133	0.0330407
0.951	0.117912	0.0448697	0.0332593	0.0602874	0.0342963	0.0331108
0.952	0.11797	0.0443029	0.0336939	0.0604293	0.0344127	0.0329798
0.953	0.11772	0.0437456	0.0341432	0.0602653	0.0345383	0.0328255
0.954	0.117083	0.0431184	0.0344941	0.0598152	0.0346302	0.0327642
0.955	0.116054	0.0424251	0.0346657	0.0592455	0.0346939	0.0328133
0.956	0.114744	0.0417885	0.0346313	0.0588255	0.0347937	0.0329257
0.957	0.113249	0.041274	0.0343649	0.0586992	0.0348938	0.0329651
0.958	0.111636	0.0409079	0.0338013	0.0587367	0.0348991	0.0327797
0.959	0.110029	0.0406818	0.0329701	0.0586353	0.0347604	0.0323267
0.96	0.10862	0.0404667	0.0320569	0.0582111	0.0344559	0.0317446
0.961	0.107562	0.0401459	0.0312442	0.0575373	0.0341139	0.0312965
0.962	0.106879	0.0397711	0.0306013	0.056876	0.0340374	0.0311593
0.963	0.106551	0.0394451	0.030146	0.0565167	0.0343941	0.0313181
0.964	0.106532	0.0391865	0.0298915	0.0565442	0.0350443	0.0316808
0.965	0.106652	0.0389689	0.0298421	0.0567848	0.0357036	0.0321994
0.966	0.10669	0.0387704	0.0300289	0.0569823	0.0361603	0.0329113
0.967	0.10655	0.0385814	0.0304731	0.0569465	0.0364067	0.0339379
0.968	0.106278	0.0383592	0.0310817	0.0566268	0.0366536	0.0353329
0.969	0.105888	0.0380797	0.0317358	0.0561601	0.037118	0.03691
0.97	0.105217	0.0378329	0.032373	0.055746	0.0377756	0.0383687
0.971	0.10413	0.0377308	0.0328811	0.0554745	0.0383876	0.039472
0.972	0.102682	0.0378231	0.0331396	0.0553735	0.0388005	0.0400609
0.973	0.10103	0.0381006	0.0331564	0.0554517	0.0391454	0.0401064
0.974	0.0993725	0.0385271	0.0330748	0.0556546	0.0396448	0.039717
0.975	0.0979101	0.0390605	0.0330639	0.0559134	0.0403365	0.0390255
0.976	0.0968342	0.0396113	0.0331526	0.0562257	0.0409145	0.0381149
0.977	0.0963006	0.0401203	0.0332744	0.0566128	0.0407749	0.0370506
0.978	0.0963798	0.0406495	0.0334679	0.057008	0.0395151	0.0359127
0.979	0.0970025	0.0412429	0.0337947	0.0573396	0.0373452	0.0347986
0.98	0.0979408	0.0417978	0.0341145	0.0576072	0.0348451	0.0338676
0.981	0.0989464	0.0421711	0.0342133	0.0577689	0.0325329	0.0332459
0.982	0.0998769	0.042339	0.0340709	0.0577315	0.0306942	0.0329066
0.983	0.100708	0.0424051	0.033842	0.0573773	0.0294412	0.0328092
0.984	0.101528	0.0424368	0.033681	0.056591	0.0287875	0.0329938
0.985	0.102428	0.0424294	0.0336683	0.0553842	0.0286192	0.0334766
0.986	0.103316	0.042493	0.033842	0.053892	0.0285374	0.0341113
0.987	0.103968	0.0427637	0.0341375	0.0523036	0.0277809	0.0345856
0.988	0.104289	0.0431285	0.0343682	0.0508323	0.0257985	0.0346811
0.989	0.104357	0.0433729	0.0343753	0.0495878	0.0228847	0.0344745
0.99	0.104304	0.0435487	0.0340933	0.0485676	0.0198434	0.0341591
0.991	0.104266	0.0439138	0.0336066	0.0477637	0.0173156	0.033775
0.992	0.104339	0.0445344	0.0331468	0.0471321	0.0156097	0.0332507
0.993	0.104486	0.0451459	0.0329289	0.0466109	0.0147076	0.0326163
0.994	0.104542	0.0454247	0.0330878	0.0462052	0.0142761	0.0319431
0.995	0.104326	0.0453219	0.0336114	0.0459743	0.0139441	0.0311608
0.996	0.10382	0.045039	0.034299	0.0459352	0.0135047	0.0301429
0.997	0.103195	0.0447249	0.0349206	0.0459538	0.0128394	0.028881
0.998	0.10264	0.044452	0.0353302	0.0458325	0.0119493	0.027518
0.999	0.102242	0.0443444	0.0354579	0.0454914	0.0110338	0.0262525
1	0.101993	0.0444227	0.035309	0.0449885	0.0104376	0.025199
1.001	0.101806	0.0445747	0.0349271	0.0444654	0.0104922	0.0243183
1.002	0.101578	0.044757	0.0343718	0.044053	0.0112925	0.023428
1.003	0.101344	0.0449493	0.0337334	0.0437825	0.0127402	0.022342
1.004	0.101325	0.0450978	0.0330858	0.0436169	0.014736	0.0210648
1.005	0.101652	0.0452136	0.0324885	0.0435372	0.0170443	0.0197647
1.006	0.102187	0.0452672	0.0320057	0.0435755	0.0192706	0.0185461
1.007	0.102743	0.0451503	0.031664	0.0438279	0.0212084	0.017397
1.008	0.10324	0.0448645	0.0314146	0.0444954	0.0228972	0.0163725
1.009	0.103584	0.044495	0.0311621	0.0457651	0.0243893	0.0156159
1.01	0.103608	0.0440779	0.0309469	0.0476885	0.0256193	0.0152035
1.011	0.103134	0.0436001	0.0309825	0.0502305	0.0264413	0.0151315
1.012	0.102037	0.0430335	0.0313959	0.0532523	0.0268431	0.0154461
1.013	0.100291	0.0423513	0.0320945	0.0565896	0.027039	0.0162712
1.014	0.0980417	0.0415041	0.0328524	0.060179	0.0273693	0.0176844
1.015	0.0955074	0.0404965	0.0334095	0.0639177	0.0281629	0.0196187
1.016	0.0928062	0.0395237	0.0336267	0.067537	0.0295509	0.0219049
1.017	0.0899529	0.0387847	0.033578	0.0707265	0.0314832	0.0244006
1.018	0.0869755	0.0382052	0.0333912	0.0732422	0.0338742	0.0270472
1.019	0.0839895	0.037608	0.0331058	0.0748797	0.0365167	0.0297651
1.02	0.081149	0.0369818	0.0326851	0.0755406	0.0390281	0.0323691
1.021	0.0785673	0.0363537	0.0320783	0.0752887	0.0410719	0.034701
1.022	0.0763925	0.0356458	0.0312868	0.0741577	0.0424701	0.0366812
1.023	0.0748762	0.0347774	0.0304023	0.0720555	0.0430938	0.0382174
1.024	0.0741947	0.0338028	0.0296138	0.0689577	0.0429201	0.0392513
1.025	0.0742416	0.032939	0.0290827	0.0649908	0.042089	0.0397366
1.026	0.0747688	0.0323695	0.0288095	0.0603057	0.0406942	0.0395378
1.027	0.0756522	0.0321396	0.028722	0.0550258	0.0387389	0.0385209
1.028	0.0769419	0.0322844	0.0287955	0.0493491	0.0362791	0.0366414
1.029	0.0787941	0.0328024	0.0290968	0.0435734	0.0334032	0.0339284
1.03	0.0813539	0.033678	0.0298123	0.0379454	0.0302515	0.0304691
1.031	0.084758	0.0349787	0.0311384	0.0325334	0.0270422	0.0263654
1.032	0.0891634	0.0367526	0.0330776	0.0273187	0.0239107	0.0217685
1.033	0.0945567	0.0389831	0.0354225	0.0223857	0.0208509	0.0169245
1.034	0.100735	0.0415776	0.0379722	0.0179037	0.0178026	0.0120731
1.035	0.107549	0.0444146	0.0406215	0.014017	0.0147256	0.00739618
1.036	0.114963	0.0475045	0.043273	0.0108048	0.011618	0.0030644
1.037	0.122897	0.0509317	0.0458647	0.00823005	0.00844448	-0.000747992
1.038	0.131121	0.0546568	0.0483743	0.00614716	0.00510242	-0.00387822
1.039	0.139272	0.0584954	0.0506986	0.00442372	0.00151193	-0.00613351
1.04	0.146966	0.0621934	0.052632	0.00306939	-0.00228968	-0.00727019
1.041	0.153965	0.0655008	0.0539325	0.00219649	-0.00613643	-0.00721656
1.042	0.160203	0.0682753	0.054497	0.00181274	-0.00981888	-0.00621063
1.043	0.165777	0.0705004	0.054571	0.00175445	-0.0131328	-0.00460826
1.044	0.170881	0.0722711	0.0546338	0.00188832	-0.0158317	-0.0027348
1.045	0.175611	0.0737613	0.0550105	0.00226578	-0.0176422	-0.000799044
1.046	0.179923	0.0751113	0.0556607	0.0030277	-0.0183009	0.00117125
1.047	0.183742	0.0763575	0.056367	0.00429029	-0.017649	0.00321067
1.048	0.18694	0.0774303	0.0569786	0.00613679	-0.0157825	0.00529578
1.049	0.189347	0.078262	0.0574397	0.00857119	-0.0129856	0.00740761
1.05	0.190829	0.0788589	0.0577821	0.0115485	-0.00952577	0.00961271
1.051	0.191243	0.0791613	0.0580415	0.0150393	-0.00553026	0.0119345
1.052	0.190459	0.0790481	0.0581058	0.0190105	-0.00105448	0.0142753
1.053	0.188448	0.0784766	0.0577517	0.023502	0.00375901	0.016589
1.054	0.185261	0.0774437	0.0568474	0.0285749	0.00871042	0.0189487
1.055	0.180935	0.0759971	0.0554107	0.0341209	0.013693	0.0214619
1.056	0.175525	0.0742219	0.0534969	0.0399419	0.0187296	0.0242172
1.057	0.169226	0.0721047	0.0512036	0.0459377	0.0238191	0.0272837
1.058	0.16243	0.0695749	0.048698	0.0520953	0.0288025	0.0306994
1.059	0.155531	0.0666502	0.0461375	0.0583837	0.0334903	0.0344174
1.06	0.148716	0.0634536	0.0436135	0.0647189	0.0377793	0.0383117
1.061	0.142108	0.0601206	0.0411542	0.0709842	0.041543	0.0422527
1.062	0.1359	0.056701	0.0387604	0.0770629	0.0446534	0.0461625
1.063	0.130136	0.0531497	0.0364273	0.0828436	0.0471764	0.0499724
1.064	0.124602	0.0494616	0.0341836	0.0881253	0.0492269	0.0536261
1.065	0.11907	0.0457268	0.0321251	0.092657	0.0507161	0.0571853
1.066	0.113492	0.041968	0.0303773	0.0963382	0.0516414	0.0607052
1.067	0.108001	0.0381216	0.0290314	0.0992519	0.0523403	0.0640688
1.068	0.102815	0.0342583	0.0280797	0.101548	0.0531029	0.067083
1.069	0.0980791	0.030648	0.0274613	0.103385	0.0538576	0.0695226
1.07	0.0938074	0.0276019	0.0272017	0.10495	0.0544689	0.0711965
1.071	0.0899635	0.0253506	0.0272943	0.106312	0.0551319	0.0721336
1.072	0.0865296	0.0239689	0.0275384	0.107357	0.0562566	0.0725268
1.073	0.0835282	0.0233525	0.027764	0.108026	0.0580432	0.0725429
1.074	0.0809454	0.0233461	0.0279594	0.108311	0.060327	0.0722471
1.075	0.0787036	0.0238511	0.0281028	0.108128	0.0627566	0.0716236
1.076	0.076786	0.0248456	0.0281608	0.107403	0.0650136	0.070737
1.077	0.0752839	0.0263392	0.0282364	0.106186	0.0668663	0.0698701
1.078	0.0742286	0.0282245	0.0286054	0.104667	0.0681734	0.0693603
1.079	0.0735048	0.0302662	0.0294774	0.103068	0.0689916	0.0693326
1.08	0.0729866	0.0323005	0.0306985	0.101438	0.0695641	0.0699109
1.081	0.0726354	0.0342789	0.0319085	0.0996801	0.0701104	0.0715607
1.082	0.0724902	0.0361151	0.0328892	0.0977769	0.0706789	0.0745244
1.083	0.0725363	0.0376585	0.0335473	0.0957541	0.0711834	0.0782199
1.084	0.0726393	0.0387922	0.0337804	0.0935737	0.0714714	0.0817025
1.085	0.0727841	0.039564	0.0335597	0.0912396	0.0714217	0.0842849
1.086	0.0731346	0.0401705	0.03311	0.0888357	0.0710642	0.0855888
1.087	0.0736757	0.0406879	0.0328432	0.0864646	0.0704833	0.0854148
1.088	0.0741617	0.0410604	0.0330411	0.08425	0.0696529	0.0837935
1.089	0.0744913	0.0413543	0.0337755	0.0823247	0.0684828	0.0810147
1.09	0.0748308	0.0417563	0.0350321	0.0807761	0.0669131	0.077486
1.091	0.0754072	0.0423715	0.0367481	0.0796212	0.0649799	0.0735188
1.092	0.0763661	0.0431166	0.0388289	0.0787467	0.0628627	0.069223
1.093	0.0778219	0.0438611	0.0411822	0.0777904	0.0607531	0.0646864
1.094	0.0798751	0.0446694	0.0437821	0.0762236	0.0587419	0.0601859
1.095	0.0825913	0.0458072	0.0466615	0.0735884	0.0569328	0.0561417
1.096	0.0860599	0.0475295	0.0498	0.0695802	0.0554069	0.0528946
1.097	0.0903459	0.0499346	0.0531086	0.0640013	0.0540309	0.0505642
1.098	0.0954554	0.052938	0.0565141	0.0566517	0.052502	0.0490633
1.099	0.101332	0.0562817	0.0598966	0.0473063	0.0504345	0.0481765
1.1	0.107573	0.0595868	0.0629435	0.0357882	0.047404	0.0475198
1.101	0.113323	0.0624292	0.0651234	0.0219391	0.043082	0.0464044
1.102	0.117648	0.0643245	0.0657324	0.00561985	0.0371582	0.0439867
1.103	0.119693	0.0646855	0.0640768	-0.0132635	0.0291968	0.0395655
1.104	0.118606	0.0628849	0.0596327	-0.0347674	0.0187864	0.0326198
1.105	0.113614	0.0583276	0.052002	-0.0587977	0.00564817	0.0227167
1.106	0.10418	0.0504579	0.0408448	-0.0849823	-0.010399	0.00955963
1.107	0.0901136	0.0387193	0.0258095	-0.112806	-0.0294	-0.00694831
1.108	0.0714393	0.022583	0.00660581	-0.141899	-0.0513117	-0.0267997
1.109	0.048132	0.00175967	-0.0167518	-0.172069	-0.0761079	-0.0498477
1.11	0.0201984	-0.0236021	-0.0439887	-0.203153	-0.103693	-0.0735977
1.111	-0.0120574	-0.0529732	-0.0748416	-0.235004	-0.133814	-0.0915212
1.112	-0.0481367	-0.085818	-0.109013	-0.267557	-0.166159	-0.0989929
1.113	-0.0876367	-0.121821	-0.146031	-0.300798	-0.200399	-0.0993881
1.114	-0.130155	-0.160726	-0.185451	-0.334692	-0.236121	-0.100469
1.115	-0.17509	-0.202221	-0.227012	-0.369128	-0.272884	-0.108495
1.116	-0.221826	-0.245876	-0.270479	-0.403903	-0.310278	-0.126859
1.117	-0.269916	-0.291178	-0.315505	-0.438815	-0.347965	-0.156878
1.118	-0.318949	-0.337741	-0.361619	-0.473791	-0.385783	-0.198369
1.119	-0.36846	-0.385311	-0.408325	-0.508842	-0.423687	-0.24991
1.12	-0.418067	-0.433576	-0.455282	-0.543909	-0.461606	-0.309128
1.121	-0.467608	-0.482151	-0.502324	-0.578839	-0.499547	-0.373113
1.122	-0.516981	-0.530725	-0.549292	-0.613455	-0.537644	-0.438955
1.123	-0.565902	-0.579113	-0.596045	-0.647612	-0.575956	-0.504093
1.124	-0.61402	-0.627165	-0.642594	-0.681193	-0.614425	-0.566535
1.125	-0.661077	-0.674685	-0.689014	-0.714103	-0.652955	-0.625065
1.126	-0.706947	-0.721458	-0.735216	-0.746215	-0.691423	-0.679116
1.127	-0.751647	-0.76729	-0.780904	-0.777379	-0.729667	-0.728521
1.128	-0.795222	-0.812095	-0.825751	-0.807576	-0.767478	-0.773436
1.129	-0.837639	-0.855979	-0.869641	-0.836916	-0.804575	-0.814284
1.13	-0.878806	-0.899143	-0.912608	-0.865532	-0.840705	-0.851676
1.131	-0.918682	-0.941683	-0.954617	-0.893463	-0.875788	-0.886323
1.132	-0.957388	-0.983497	-0.99563	-0.920501	-0.90984	-0.918894
1.133	-0.99516	-1.02435	-1.03572	-0.946278	-0.942819	-0.949902
1.134	-1.03222	-1.06397	-1.07495	-0.970546	-0.974643	-0.979648
1.135	-1.06874	-1.10214	-1.11332	-0.993228	-1.00521	-1.00831
1.136	-1.10478	-1.13864	-1.15069	-1.01431	-1.03447	-1.03612
1.137	-1.14026	-1.17328	-1.1869	-1.03377	-1.06239	-1.06327
1.138	-1.17491	-1.20596	-1.22171	-1.0516	-1.08896	-1.08984
1.139	-1.20857	-1.2368	-1.25489	-1.06777	-1.11403	-1.1157
1.14	-1.24116	-1.26606	-1.28626	-1.08224	-1.13749	-1.14073
1.141	-1.27253	-1.29387	-1.31582	-1.09506	-1.15936	-1.16473
1.142	-1.30245	-1.32021	-1.34357	-1.10631	-1.17961	-1.18733
1.143	-1.33086	-1.34502	-1.36944	-1.11602	-1.19805	-1.20818
1.144	-1.35778	-1.36823	-1.39333	-1.12425	-1.21463	-1.22708
1.145	-1.38325	-1.38975	-1.41523	-1.13113	-1.22945	-1.24404
1.146	-1.40717	-1.40946	-1.43519	-1.13691	-1.24276	-1.25913
1.147	-1.42943	-1.42725	-1.45332	-1.14189	-1.25466	-1.27244
1.148	-1.45011	-1.44309	-1.46977	-1.14632	-1.26509	-1.28402
1.149	-1.46931	-1.45707	-1.48456	-1.15037	-1.27397	-1.29393
1.15	-1.48715	-1.4692	-1.49762	-1.15402	-1.2813	-1.30229
1.151	-1.50373	-1.47954	-1.509	-1.1572	-1.28716	-1.30925
1.152	-1.51913	-1.48834	-1.51888	-1.15981	-1.29163	-1.31487
1.153	-1.53349	-1.49598	-1.52736	-1.16171	-1.29479	-1.31922
1.154	-1.54684	-1.50266	-1.53438	-1.16285	-1.29679	-1.32243
1.155	-1.55914	-1.50824	-1.53985	-1.16326	-1.29776	-1.32449
1.156	-1.57038	-1.51256	-1.5438	-1.16302	-1.29784	-1.32536
1.157	-1.58049	-1.51562	-1.54639	-1.16216	-1.29726	-1.32501
1.158	-1.58944	-1.51757	-1.54784	-1.16068	-1.29632	-1.32346
1.159	-1.59737	-1.51862	-1.54838	-1.15871	-1.29516	-1.32086
1.16	-1.6044	-1.51899	-1.54819	-1.1564	-1.29367	-1.31752
1.161	-1.61058	-1.51887	-1.54737	-1.15373	-1.29169	-1.31364
1.162	-1.61602	-1.51838	-1.54606	-1.15067	-1.28919	-1.30924
1.163	-1.62099	-1.51746	-1.54439	-1.14721	-1.28618	-1.30439
1.164	-1.62571	-1.51602	-1.54244	-1.14338	-1.28265	-1.29924
1.165	-1.63025	-1.51398	-1.54013	-1.13918	-1.27853	-1.29385
1.166	-1.63444	-1.51125	-1.53732	-1.13454	-1.27372	-1.28831
1.167	-1.63801	-1.50775	-1.53397	-1.12937	-1.26814	-1.28278
1.168	-1.6408	-1.50343	-1.53012	-1.12372	-1.26188	-1.27752
1.169	-1.64276	-1.49832	-1.52566	-1.11763	-1.25511	-1.27266
1.17	-1.64392	-1.49245	-1.52042	-1.11115	-1.24798	-1.26819
1.171	-1.64432	-1.4859	-1.51428	-1.10446	-1.24051	-1.26404
1.172	-1.64393	-1.47877	-1.50716	-1.09781	-1.23267	-1.26004
1.173	-1.64274	-1.47117	-1.49916	-1.09143	-1.22447	-1.25604
1.174	-1.64073	-1.46313	-1.49051	-1.08535	-1.21606	-1.25186
1.175	-1.63797	-1.45461	-1.48147	-1.07953	-1.20762	-1.24718
1.176	-1.6345	-1.44552	-1.47217	-1.07379	-1.19934	-1.24167
1.177	-1.63031	-1.43577	-1.46257	-1.06792	-1.19143	-1.23518
1.178	-1.62535	-1.42552	-1.45257	-1.06178	-1.18404	-1.2278
1.179	-1.61958	-1.41509	-1.44208	-1.0554	-1.17719	-1.21979
1.18	-1.61294	-1.40475	-1.43122	-1.04892	-1.17072	-1.21144
1.181	-1.60535	-1.39451	-1.42016	-1.04253	-1.16449	-1.20297
1.182	-1.59689	-1.38427	-1.40907	-1.03635	-1.15829	-1.19447
1.183	-1.58776	-1.37398	-1.39802	-1.03041	-1.15187	-1.18596
1.184	-1.57816	-1.36361	-1.38689	-1.02463	-1.14521	-1.17734
1.185	-1.56817	-1.35312	-1.37565	-1.01887	-1.13845	-1.16846
1.186	-1.55788	-1.34251	-1.36444	-1.01299	-1.13174	-1.15922
1.187	-1.54749	-1.33181	-1.35344	-1.00696	-1.12528	-1.14961
1.188	-1.53709	-1.32097	-1.34286	-1.00091	-1.11946	-1.1395
1.189	-1.52672	-1.30979	-1.33279	-0.994977	-1.1146	-1.12857
1.19	-1.51646	-1.29819	-1.32304	-0.989094	-1.1105	-1.11682
1.191	-1.50636	-1.28632	-1.31334	-0.982993	-1.1066	-1.10487
1.192	-1.49642	-1.27441	-1.30356	-0.976446	-1.10242	-1.09351
1.193	-1.48666	-1.26258	-1.29371	-0.96945	-1.09751	-1.08327
1.194	-1.4772	-1.25088	-1.28382	-0.962113	-1.0914	-1.0743
1.195	-1.46811	-1.23941	-1.27387	-0.954529	-1.08387	-1.06644
1.196	-1.4594	-1.22832	-1.26387	-0.946816	-1.07498	-1.05948
1.197	-1.45094	-1.21784	-1.25387	-0.939163	-1.06495	-1.05324
1.198	-1.44264	-1.20802	-1.244	-0.931752	-1.05401	-1.04749
1.199	-1.4345	-1.19879	-1.2344	-0.924678	-1.04239	-1.04199
1.2	-1.42671	-1.19007	-1.22504	-0.917952	-1.03027	-1.03668
1.201	-1.4194	-1.18182	-1.2158	-0.911525	-1.01787	-1.03143
1.202	-1.41255	-1.17398	-1.20667	-0.905357	-1.0055	-1.02604
1.203	-1.40607	-1.16648	-1.19777	-0.899354	-0.993595	-1.02039
1.204	-1.39989	-1.15925	-1.18912	-0.893275	-0.982457	-1.01448
1.205	-1.39401	-1.15229	-1.18063	-0.886892	-0.972312	-1.00836
1.206	-1.38847	-1.14559	-1.17226	-0.880176	-0.963325	-1.002
1.207	-1.38324	-1.13904	-1.16395	-0.873245	-0.955483	-0.995251
1.208	-1.37814	-1.13235	-1.15566	-0.86622	-0.94857	-0.988083
1.209	-1.37295	-1.12523	-1.14735	-0.859159	-0.942328	-0.980607
1.21	-1.36756	-1.11759	-1.13903	-0.852074	-0.93646	-0.972975
1.211	-1.36201	-1.10962	-1.13076	-0.844965	-0.930615	-0.965487
1.212	-1.35623	-1.10155	-1.12261	-0.837892	-0.924548	-0.958525
1.213	-1.3502	-1.09351	-1.11462	-0.830962	-0.918202	-0.952188
1.214	-1.344	-1.08562	-1.10687	-0.824223	-0.911648	-0.946278
1.215	-1.33774	-1.07784	-1.09936	-0.817681	-0.90507	-0.940473
1.216	-1.33133	-1.07008	-1.09196	-0.811374	-0.898695	-0.934374
1.217	-1.32455	-1.06233	-1.08465	-0.805303	-0.892729	-0.927665
1.218	-1.31733	-1.05472	-1.07741	-0.799463	-0.887455	-0.920253
1.219	-1.30975	-1.0474	-1.07011	-0.793945	-0.883005	-0.912192
1.22	-1.302	-1.04028	-1.06262	-0.788782	-0.879034	-0.903381
1.221	-1.2942	-1.03321	-1.05494	-0.783812	-0.874925	-0.893261
1.222	-1.28633	-1.02603	-1.04716	-0.77885	-0.870147	-0.881373
1.223	-1.2782	-1.01861	-1.03943	-0.773853	-0.864465	-0.868123
1.224	-1.26987	-1.0108	-1.03188	-0.76887	-0.857968	-0.854542
1.225	-1.26164	-1.00253	-1.02461	-0.763966	-0.850888	-0.841619
1.226	-1.25371	-0.993969	-1.01756	-0.759152	-0.843436	-0.829971
1.227	-1.24598	-0.98531	-1.01055	-0.754328	-0.835828	-0.819849
1.228	-1.23825	-0.976702	-1.00342	-0.749385	-0.828304	-0.811244
1.229	-1.23039	-0.968351	-0.99619	-0.744318	-0.82098	-0.804128
1.23	-1.2223	-0.960427	-0.988928	-0.739259	-0.813837	-0.798625
1.231	-1.21394	-0.952935	-0.981683	-0.734419	-0.806841	-0.79484
1.232	-1.20537	-0.945854	-0.974496	-0.730049	-0.800037	-0.792581
1.233	-1.19676	-0.939154	-0.967364	-0.726385	-0.793552	-0.791413
1.234	-1.18831	-0.932691	-0.960246	-0.723406	-0.787466	-0.790901
1.235	-1.18004	-0.926346	-0.953175	-0.720767	-0.781823	-0.790684
1.236	-1.17195	-0.920113	-0.946331	-0.718032	-0.776727	-0.79026
1.237	-1.16406	-0.91406	-0.93987	-0.714895	-0.772281	-0.788859
1.238	-1.15637	-0.90824	-0.933771	-0.711249	-0.768499	-0.785931
1.239	-1.14881	-0.902518	-0.927923	-0.70711	-0.765213	-0.781564
1.24	-1.14137	-0.896683	-0.922289	-0.702471	-0.762076	-0.776158
1.241	-1.13406	-0.890722	-0.916845	-0.69733	-0.758785	-0.770099
1.242	-1.12681	-0.884765	-0.911434	-0.69182	-0.755244	-0.763856
1.243	-1.11948	-0.878834	-0.905877	-0.686166	-0.751483	-0.758067
1.244	-1.11203	-0.872831	-0.900145	-0.680555	-0.747491	-0.75319
1.245	-1.10457	-0.866794	-0.894311	-0.675118	-0.743158	-0.749132
1.246	-1.09728	-0.860894	-0.888444	-0.669948	-0.738463	-0.745476
1.247	-1.09026	-0.855194	-0.882512	-0.665111	-0.73368	-0.741843
1.248	-1.08343	-0.849643	-0.876441	-0.660627	-0.729302	-0.737948
1.249	-1.07665	-0.84414	-0.870267	-0.65644	-0.725594	-0.73362
1.25	-1.06979	-0.838525	-0.864138	-0.652379	-0.722252	-0.728851
1.251	-1.06287	-0.832693	-0.858204	-0.64825	-0.718701	-0.72377
1.252	-1.05603	-0.826678	-0.852483	-0.644012	-0.714557	-0.718518
1.253	-1.04942	-0.820638	-0.846903	-0.639706	-0.70974	-0.713173
1.254	-1.04317	-0.81477	-0.841473	-0.635343	-0.704338	-0.707771
1.255	-1.03738	-0.80918	-0.836308	-0.630983	-0.698483	-0.702388
1.256	-1.03211	-0.803833	-0.831486	-0.626707	-0.69227	-0.69717
1.257	-1.02726	-0.798625	-0.826909	-0.622513	-0.685799	-0.692203
1.258	-1.02265	-0.793464	-0.822362	-0.618397	-0.679277	-0.687509
1.259	-1.01819	-0.78835	-0.817718	-0.614366	-0.673004	-0.683082
1.26	-1.01375	-0.783394	-0.812942	-0.610414	-0.667349	-0.678908
1.261	-1.00929	-0.778668	-0.808023	-0.606523	-0.662613	-0.675106
1.262	-1.00482	-0.774078	-0.803012	-0.602724	-0.658746	-0.671871
1.263	-1.00033	-0.769548	-0.798071	-0.599166	-0.655395	-0.66919
1.264	-0.995691	-0.765205	-0.793373	-0.595962	-0.652147	-0.666823
1.265	-0.990873	-0.761253	-0.788905	-0.593011	-0.648663	-0.664587
1.266	-0.986073	-0.757809	-0.784538	-0.590131	-0.644677	-0.662425
1.267	-0.981436	-0.754812	-0.780294	-0.587283	-0.640025	-0.660259
1.268	-0.976846	-0.752039	-0.77633	-0.584482	-0.6348	-0.657957
1.269	-0.972098	-0.749292	-0.772697	-0.581668	-0.629289	-0.655842
1.27	-0.967148	-0.746478	-0.769268	-0.578781	-0.623714	-0.65545
1.271	-0.962046	-0.743469	-0.765864	-0.575788	-0.618166	-0.658646
1.272	-0.956809	-0.740066	-0.762355	-0.572652	-0.612717	-0.665405
1.273	-0.951439	-0.736124	-0.758633	-0.569364	-0.607453	-0.673543
1.274	-0.945922	-0.731637	-0.754652	-0.565963	-0.602509	-0.68041
1.275	-0.940292	-0.726737	-0.750425	-0.562497	-0.598033	-0.684133
1.276	-0.934697	-0.72161	-0.745921	-0.559047	-0.594124	-0.683867
1.277	-0.929311	-0.716413	-0.741066	-0.555752	-0.590822	-0.679543
1.278	-0.924283	-0.711278	-0.735891	-0.552695	-0.588051	-0.671476
1.279	-0.919668	-0.706293	-0.730574	-0.549867	-0.58559	-0.660207
1.28	-0.915378	-0.701543	-0.725353	-0.547259	-0.583215	-0.646593
1.281	-0.911266	-0.697183	-0.720317	-0.544988	-0.580805	-0.631772
1.282	-0.90721	-0.693245	-0.715379	-0.543185	-0.578317	-0.617044
1.283	-0.903114	-0.689548	-0.710511	-0.541742	-0.575713	-0.603966
1.284	-0.898906	-0.685938	-0.705794	-0.540375	-0.572996	-0.59389
1.285	-0.894548	-0.68236	-0.701287	-0.538929	-0.570266	-0.587201
1.286	-0.890025	-0.678825	-0.697046	-0.537501	-0.567573	-0.583383
1.287	-0.885322	-0.675386	-0.693151	-0.536277	-0.564828	-0.581632
1.288	-0.880431	-0.672	-0.689671	-0.535285	-0.561999	-0.581215
1.289	-0.875406	-0.668512	-0.686612	-0.534322	-0.559188	-0.581597
1.29	-0.870348	-0.664827	-0.683869	-0.533072	-0.556541	-0.58242
1.291	-0.865294	-0.661002	-0.681275	-0.531251	-0.554181	-0.583297
1.292	-0.860268	-0.657231	-0.678731	-0.528804	-0.552169	-0.583694
1.293	-0.855405	-0.653683	-0.676277	-0.525908	-0.550464	-0.583086
1.294	-0.850876	-0.650351	-0.673906	-0.52278	-0.548877	-0.581131
1.295	-0.846743	-0.647137	-0.671397	-0.519616	-0.547145	-0.577738
1.296	-0.842923	-0.643962	-0.668547	-0.516519	-0.545154	-0.573114
1.297	-0.839255	-0.640785	-0.665415	-0.513474	-0.542944	-0.567633
1.298	-0.835655	-0.637578	-0.662157	-0.510478	-0.540545	-0.561718
1.299	-0.832099	-0.634246	-0.658862	-0.507555	-0.537938	-0.555816
1.3	-0.828527	-0.630661	-0.655591	-0.504687	-0.5351	-0.550234
1.301	-0.824937	-0.626855	-0.652397	-0.501776	-0.532014	-0.545042
1.302	-0.821437	-0.62303	-0.649328	-0.498714	-0.528721	-0.54022
1.303	-0.818141	-0.619339	-0.646445	-0.495509	-0.525363	-0.535848
1.304	-0.815104	-0.615865	-0.643739	-0.492263	-0.522061	-0.532031
1.305	-0.812409	-0.612745	-0.641101	-0.489087	-0.518822	-0.528667
1.306	-0.810142	-0.610071	-0.638483	-0.486063	-0.515628	-0.525399
1.307	-0.808177	-0.607733	-0.635972	-0.483252	-0.512472	-0.52192
1.308	-0.806233	-0.6055	-0.633625	-0.480728	-0.509374	-0.518227
1.309	-0.804074	-0.603238	-0.631293	-0.478461	-0.506384	-0.514481
1.31	-0.801515	-0.600955	-0.628752	-0.476254	-0.50355	-0.510811
1.311	-0.798422	-0.5987	-0.625953	-0.473886	-0.500891	-0.5073
1.312	-0.794787	-0.596422	-0.623007	-0.471244	-0.498325	-0.504056
1.313	-0.790697	-0.593972	-0.619921	-0.468359	-0.495669	-0.501228
1.314	-0.786268	-0.591325	-0.616608	-0.465391	-0.492793	-0.498945
1.315	-0.781626	-0.588652	-0.613178	-0.462492	-0.489679	-0.497351
1.316	-0.776902	-0.586146	-0.609939	-0.459694	-0.486456	-0.496556
1.317	-0.772243	-0.583854	-0.607108	-0.457011	-0.483374	-0.49644
1.318	-0.767773	-0.581694	-0.60466	-0.454571	-0.48054	-0.496692
1.319	-0.763517	-0.579546	-0.602461	-0.452493	-0.477849	-0.496912
1.32	-0.759418	-0.577331	-0.600457	-0.450777	-0.47524	-0.496669
1.321	-0.75538	-0.575081	-0.598578	-0.449348	-0.472759	-0.495668
1.322	-0.751359	-0.572812	-0.596568	-0.448128	-0.470474	-0.493806
1.323	-0.74739	-0.570462	-0.594168	-0.447037	-0.468411	-0.491069
1.324	-0.74352	-0.568019	-0.591318	-0.445976	-0.4665	-0.487501
1.325	-0.739815	-0.56552	-0.588157	-0.444856	-0.46467	-0.483229
1.326	-0.736276	-0.56295	-0.58492	-0.443649	-0.462938	-0.478524
1.327	-0.732807	-0.560289	-0.581783	-0.442405	-0.461348	-0.473755
1.328	-0.729377	-0.55758	-0.578802	-0.441192	-0.459932	-0.46918
1.329	-0.726039	-0.55482	-0.575921	-0.440015	-0.458721	-0.464923
1.33	-0.72281	-0.551983	-0.573031	-0.438884	-0.457696	-0.461106
1.331	-0.719709	-0.549164	-0.570067	-0.43785	-0.456703	-0.457841
1.332	-0.716712	-0.546479	-0.567079	-0.436963	-0.455541	-0.455183
1.333	-0.713677	-0.543889	-0.564301	-0.436268	-0.454129	-0.453142
1.334	-0.710475	-0.541303	-0.561976	-0.435919	-0.452479	-0.451607
1.335	-0.707074	-0.538774	-0.560088	-0.436021	-0.450655	-0.450426
1.336	-0.703463	-0.536439	-0.558398	-0.436393	-0.448821	-0.449609
1.337	-0.699673	-0.534382	-0.556715	-0.43672	-0.447187	-0.449423
1.338	-0.695825	-0.532511	-0.555032	-0.436775	-0.445871	-0.450276
1.339	-0.692047	-0.530504	-0.553484	-0.436434	-0.444795	-0.452362
1.34	-0.688325	-0.528133	-0.552142	-0.435635	-0.443833	-0.455286
1.341	-0.68449	-0.525534	-0.550861	-0.434353	-0.442989	-0.45797
1.342	-0.680398	-0.522947	-0.549434	-0.432694	-0.44225	-0.45933
1.343	-0.67612	-0.520448	-0.547825	-0.43085	-0.441514	-0.459095
1.344	-0.671884	-0.518045	-0.546029	-0.428895	-0.440687	-0.457593
1.345	-0.667851	-0.515757	-0.54387	-0.426805	-0.439713	-0.45513
1.346	-0.664051	-0.5136	-0.54118	-0.424598	-0.43858	-0.451904
1.347	-0.660508	-0.511533	-0.537978	-0.4223	-0.437256	-0.448142
1.348	-0.657262	-0.509451	-0.53435	-0.41991	-0.43568	-0.444037
1.349	-0.654296	-0.507243	-0.530374	-0.417464	-0.433848	-0.439763
1.35	-0.651496	-0.504832	-0.526218	-0.415032	-0.431785	-0.435602
1.351	-0.648733	-0.502209	-0.52224	-0.412646	-0.429517	-0.431825
1.352	-0.645927	-0.499433	-0.518822	-0.410266	-0.427098	-0.428556
1.353	-0.643054	-0.496546	-0.516036	-0.407843	-0.424602	-0.425804
1.354	-0.640208	-0.493549	-0.513753	-0.405383	-0.422081	-0.423519
1.355	-0.637581	-0.490612	-0.511957	-0.402926	-0.419606	-0.421639
1.356	-0.635282	-0.488078	-0.510617	-0.400524	-0.417372	-0.420053
1.357	-0.633214	-0.486059	-0.509525	-0.398235	-0.415552	-0.418571
1.358	-0.631251	-0.484337	-0.508489	-0.396097	-0.414092	-0.417025
1.359	-0.629391	-0.48269	-0.507429	-0.394071	-0.412765	-0.4153
1.36	-0.627651	-0.48105	-0.506254	-0.392088	-0.411332	-0.413369
1.361	-0.625985	-0.479384	-0.504888	-0.39011	-0.409645	-0.411342
1.362	-0.624336	-0.477628	-0.503365	-0.388088	-0.40775	-0.409344
1.363	-0.622617	-0.475761	-0.501799	-0.38606	-0.405841	-0.407434
1.364	-0.620743	-0.47384	-0.500339	-0.384205	-0.404023	-0.405703
1.365	-0.618779	-0.471996	-0.499103	-0.382646	-0.402301	-0.404259
1.366	-0.61686	-0.470408	-0.498099	-0.381339	-0.400768	-0.403111
1.367	-0.615037	-0.469178	-0.497249	-0.380205	-0.399527	-0.402207
1.368	-0.613328	-0.46824	-0.496348	-0.379256	-0.398507	-0.401453
1.369	-0.611695	-0.467435	-0.495122	-0.378537	-0.397524	-0.400759
1.37	-0.610011	-0.466623	-0.493444	-0.377969	-0.396447	-0.400138
1.371	-0.608218	-0.46575	-0.491383	-0.377449	-0.395257	-0.399654
1.372	-0.606459	-0.464704	-0.489092	-0.376947	-0.393997	-0.399363
1.373	-0.604917	-0.46326	-0.486715	-0.376395	-0.39274	-0.399363
1.374	-0.603545	-0.461422	-0.484295	-0.375746	-0.391508	-0.399702
1.375	-0.60216	-0.459475	-0.481814	-0.375055	-0.390255	-0.400324
1.376	-0.600654	-0.457592	-0.479368	-0.374347	-0.388913	-0.401208
1.377	-0.598943	-0.455717	-0.477144	-0.373518	-0.387437	-0.402495
1.378	-0.596941	-0.453742	-0.475232	-0.372447	-0.385894	-0.404349
1.379	-0.59467	-0.451639	-0.473544	-0.371215	-0.384471	-0.406575
1.38	-0.592244	-0.449504	-0.471946	-0.370118	-0.383375	-0.408311
1.381	-0.589726	-0.447499	-0.470379	-0.369391	-0.382713	-0.408399
1.382	-0.587179	-0.445779	-0.46883	-0.369112	-0.382431	-0.406316
1.383	-0.584716	-0.444433	-0.46727	-0.369275	-0.382381	-0.402503
1.384	-0.582372	-0.443427	-0.465695	-0.369758	-0.382466	-0.397824
1.385	-0.5801	-0.442558	-0.46415	-0.370311	-0.382752	-0.392918
1.386	-0.577841	-0.441547	-0.462608	-0.37062	-0.383351	-0.387976
1.387	-0.575562	-0.440165	-0.461003	-0.370399	-0.384127	-0.383022
1.388	-0.573309	-0.43831	-0.459315	-0.36952	-0.384774	-0.378337
1.389	-0.571129	-0.436057	-0.457487	-0.368063	-0.385124	-0.374416
1.39	-0.568948	-0.433584	-0.455477	-0.366177	-0.385174	-0.371603
1.391	-0.566654	-0.431063	-0.453382	-0.364009	-0.384919	-0.369993
1.392	-0.564262	-0.428675	-0.451362	-0.361798	-0.384317	-0.369634
1.393	-0.561834	-0.426591	-0.449526	-0.359826	-0.383489	-0.370629
1.394	-0.559346	-0.424851	-0.447918	-0.358252	-0.382739	-0.373019
1.395	-0.556698	-0.423374	-0.446498	-0.357036	-0.38223	-0.376628
1.396	-0.553801	-0.422074	-0.445181	-0.355917	-0.381836	-0.38103
1.397	-0.550661	-0.420861	-0.44395	-0.354637	-0.381316	-0.385527
1.398	-0.547372	-0.419552	-0.442832	-0.353237	-0.38051	-0.389126
1.399	-0.54404	-0.418022	-0.44184	-0.351866	-0.379389	-0.390821
1.4	-0.540808	-0.416411	-0.440939	-0.350441	-0.377902	-0.390225
1.401	-0.537864	-0.414926	-0.439962	-0.348768	-0.375893	-0.38778
1.402	-0.535303	-0.413622	-0.438703	-0.346803	-0.373251	-0.384293
1.403	-0.533096	-0.41245	-0.437076	-0.344605	-0.370041	-0.380561
1.404	-0.531262	-0.411364	-0.435146	-0.342203	-0.366402	-0.377306
1.405	-0.529873	-0.41035	-0.433101	-0.339606	-0.362331	-0.375027
1.406	-0.528947	-0.409345	-0.431065	-0.336851	-0.357707	-0.373828
1.407	-0.528398	-0.408169	-0.429003	-0.333954	-0.352513	-0.373416
1.408	-0.527996	-0.406634	-0.426953	-0.330872	-0.346894	-0.373308
1.409	-0.527536	-0.404708	-0.425126	-0.327644	-0.341037	-0.373095
1.41	-0.527006	-0.402529	-0.423662	-0.324475	-0.335135	-0.372394
1.411	-0.526418	-0.400269	-0.422468	-0.321607	-0.32943	-0.370753
1.412	-0.525685	-0.398055	-0.421369	-0.319115	-0.324172	-0.367969
1.413	-0.524652	-0.395991	-0.420313	-0.316903	-0.3195	-0.364241
1.414	-0.523141	-0.394136	-0.419335	-0.314888	-0.315502	-0.359909
1.415	-0.521092	-0.392452	-0.418324	-0.313133	-0.31233	-0.355327
1.416	-0.518648	-0.390905	-0.416998	-0.311836	-0.310051	-0.35074
1.417	-0.51605	-0.389598	-0.415184	-0.311093	-0.308512	-0.346151
1.418	-0.513482	-0.388686	-0.413002	-0.310788	-0.307463	-0.341519
1.419	-0.511055	-0.388134	-0.410777	-0.310743	-0.306717	-0.337013
1.42	-0.508861	-0.387728	-0.408756	-0.31083	-0.306206	-0.332926
1.421	-0.506926	-0.387303	-0.406985	-0.311035	-0.305905	-0.329467
1.422	-0.505184	-0.386829	-0.405437	-0.311389	-0.305785	-0.326678
1.423	-0.503506	-0.386356	-0.404129	-0.311739	-0.305859	-0.324499
1.424	-0.501778	-0.385887	-0.40307	-0.311839	-0.306148	-0.322931
1.425	-0.499954	-0.385264	-0.402252	-0.311672	-0.306658	-0.32211
1.426	-0.498019	-0.384358	-0.401628	-0.311367	-0.307374	-0.32212
1.427	-0.495975	-0.383196	-0.401066	-0.310903	-0.308164	-0.322837
1.428	-0.493803	-0.381824	-0.400459	-0.310224	-0.308865	-0.323995
1.429	-0.491453	-0.380319	-0.3998	-0.309447	-0.309488	-0.325251
1.43	-0.488908	-0.378772	-0.399015	-0.30874	-0.310131	-0.326285
1.431	-0.486194	-0.377202	-0.397894	-0.30813	-0.310789	-0.326969
1.432	-0.483343	-0.375622	-0.396313	-0.307569	-0.311293	-0.327311
1.433	-0.480407	-0.374036	-0.394404	-0.30706	-0.311349	-0.327217
1.434	-0.477457	-0.372474	-0.392416	-0.306624	-0.310759	-0.326534
1.435	-0.474494	-0.371078	-0.390537	-0.306228	-0.309553	-0.325289
1.436	-0.471462	-0.369941	-0.388848	-0.305829	-0.307868	-0.323703
1.437	-0.468383	-0.368964	-0.387372	-0.30547	-0.305929	-0.322069
1.438	-0.465372	-0.368067	-0.386207	-0.305227	-0.304101	-0.320587
1.439	-0.462498	-0.367275	-0.385445	-0.305124	-0.302723	-0.319256
1.44	-0.459748	-0.36655	-0.384972	-0.305087	-0.301911	-0.31796
1.441	-0.457128	-0.365782	-0.384574	-0.304964	-0.30165	-0.316615
1.442	-0.454657	-0.364863	-0.384152	-0.304684	-0.301927	-0.315217
1.443	-0.452337	-0.363672	-0.383647	-0.304308	-0.302619	-0.313763
1.444	-0.450183	-0.362133	-0.382885	-0.303957	-0.303447	-0.312206
1.445	-0.448174	-0.360345	-0.381647	-0.303709	-0.304214	-0.310542
1.446	-0.446239	-0.358553	-0.379838	-0.30347	-0.304878	-0.308824
1.447	-0.444315	-0.356949	-0.377535	-0.30303	-0.305316	-0.3071
1.448	-0.442353	-0.35555	-0.375	-0.302295	-0.305296	-0.305446
1.449	-0.440274	-0.354219	-0.372554	-0.301379	-0.304758	-0.303925
1.45	-0.438074	-0.352852	-0.370366	-0.300447	-0.303844	-0.30252
1.451	-0.435992	-0.351495	-0.36851	-0.299526	-0.302679	-0.301156
1.452	-0.434335	-0.350274	-0.367063	-0.298522	-0.301262	-0.299782
1.453	-0.433177	-0.349222	-0.365954	-0.297392	-0.299584	-0.29841
1.454	-0.432381	-0.34823	-0.36503	-0.296164	-0.297694	-0.297087
1.455	-0.431769	-0.347251	-0.364228	-0.294822	-0.29569	-0.295878
1.456	-0.431211	-0.346437	-0.363503	-0.293299	-0.293803	-0.294792
1.457	-0.430684	-0.346004	-0.362769	-0.291557	-0.292262	-0.293777
1.458	-0.430231	-0.345939	-0.362034	-0.289605	-0.291089	-0.292853
1.459	-0.429886	-0.345896	-0.361413	-0.287525	-0.290205	-0.292071
1.46	-0.429762	-0.345484	-0.360917	-0.285494	-0.289547	-0.291478
1.461	-0.430013	-0.344606	-0.360364	-0.283647	-0.289001	-0.290897
1.462	-0.430631	-0.343456	-0.359615	-0.281959	-0.288394	-0.289416
1.463	-0.431424	-0.342256	-0.358751	-0.280281	-0.287617	-0.28603
1.464	-0.432094	-0.341137	-0.357987	-0.278495	-0.286648	-0.280985
1.465	-0.432374	-0.340202	-0.357456	-0.276649	-0.2855	-0.275622
1.466	-0.432199	-0.339593	-0.357082	-0.274952	-0.284257	-0.269668
1.467	-0.431616	-0.339412	-0.356733	-0.273632	-0.283001	-0.259009
1.468	-0.430653	-0.339599	-0.356407	-0.272784	-0.281671	-0.239654
1.469	-0.429387	-0.339981	-0.35617	-0.272309	-0.280135	-0.213197
1.47	-0.427934	-0.340388	-0.355976	-0.272008	-0.278337	-0.184634
1.471	-0.426402	-0.340646	-0.355608	-0.271828	-0.276347	-0.156339
1.472	-0.424959	-0.340574	-0.354924	-0.271908	-0.274374	-0.127362
1.473	-0.423773	-0.340072	-0.35405	-0.272293	-0.272676	-0.0972457
1.474	-0.422872	-0.339152	-0.353191	-0.272833	-0.271429	-0.0674497
1.475	-0.42214	-0.337854	-0.35242	-0.273394	-0.2707	-0.0402912
1.476	-0.421385	-0.336157	-0.351732	-0.27393	-0.270448	-0.0186546
1.477	-0.420376	-0.334083	-0.351127	-0.274399	-0.270593	-0.005785
1.478	-0.418955	-0.331807	-0.350492	-0.274813	-0.271118	-0.00425001
1.479	-0.417149	-0.329621	-0.34961	-0.275242	-0.272026	-0.0149499
1.48	-0.415106	-0.327737	-0.348347	-0.275701	-0.273214	-0.0370277
1.481	-0.412943	-0.326186	-0.346749	-0.276165	-0.274411	-0.0683769
1.482	-0.410646	-0.324946	-0.344985	-0.276575	-0.27531	-0.106114
1.483	-0.408219	-0.323955	-0.343196	-0.276876	-0.275811	-0.14694
1.484	-0.405819	-0.323097	-0.341372	-0.277116	-0.276107	-0.187599
1.485	-0.403556	-0.32231	-0.33947	-0.277339	-0.276417	-0.225368
1.486	-0.401386	-0.321542	-0.337581	-0.27741	-0.276689	-0.258292
1.487	-0.399256	-0.320709	-0.335868	-0.277138	-0.27677	-0.285196
1.488	-0.397228	-0.31981	-0.334409	-0.276492	-0.276642	-0.305607
1.489	-0.395466	-0.318889	-0.333179	-0.275509	-0.276375	-0.319579
1.49	-0.394075	-0.317905	-0.332095	-0.274189	-0.276045	-0.327603
1.491	-0.393021	-0.316716	-0.331034	-0.272565	-0.275681	-0.330563
1.492	-0.392285	-0.315194	-0.329892	-0.270755	-0.275272	-0.329578
1.493	-0.39189	-0.313364	-0.328734	-0.26892	-0.274823	-0.325742
1.494	-0.391736	-0.311395	-0.327799	-0.267205	-0.27431	-0.319918
1.495	-0.391544	-0.309464	-0.327177	-0.265645	-0.273653	-0.312773
1.496	-0.391059	-0.30768	-0.326671	-0.264159	-0.272699	-0.304964
1.497	-0.390244	-0.306144	-0.326145	-0.262733	-0.271312	-0.297212
1.498	-0.389203	-0.304918	-0.325627	-0.26145	-0.269516	-0.290161
1.499	-0.388059	-0.303932	-0.325067	-0.260338	-0.267456	-0.284167
1.5	-0.386901	-0.303057	-0.324284	-0.259432	-0.265253	-0.279253
1.501	-0.385764	-0.302246	-0.323162	-0.258834	-0.262981	-0.27533
1.502	-0.384678	-0.301558	-0.321862	-0.258505	-0.260733	-0.272435
1.503	-0.383712	-0.301054	-0.320697	-0.258236	-0.258582	-0.270712
1.504	-0.382908	-0.300714	-0.319802	-0.257889	-0.256444	-0.270264
1.505	-0.382227	-0.300414	-0.319063	-0.257436	-0.25413	-0.27107
1.506	-0.381653	-0.300014	-0.31832	-0.256821	-0.251582	-0.273013
1.507	-0.381231	-0.299515	-0.317634	-0.255957	-0.248973	-0.275878
1.508	-0.380926	-0.299036	-0.317239	-0.254873	-0.246532	-0.279303
1.509	-0.380656	-0.298665	-0.317165	-0.253719	-0.244381	-0.282786
1.51	-0.380386	-0.298433	-0.317181	-0.252558	-0.242542	-0.285809
1.511	-0.3801	-0.29832	-0.317085	-0.25132	-0.241043	-0.28811
1.512	-0.37975	-0.298193	-0.316808	-0.249993	-0.239991	-0.289879
1.513	-0.379264	-0.297862	-0.316356	-0.248676	-0.23944	-0.291564
1.514	-0.378588	-0.297315	-0.315763	-0.247411	-0.239227	-0.293475
1.515	-0.377781	-0.29674	-0.315027	-0.246138	-0.239133	-0.295501
1.516	-0.376961	-0.296305	-0.314143	-0.244852	-0.239124	-0.297165
1.517	-0.376188	-0.295996	-0.313183	-0.243643	-0.239259	-0.297986
1.518	-0.375533	-0.295685	-0.312279	-0.242629	-0.239413	-0.297687
1.519	-0.375123	-0.29531	-0.311534	-0.241943	-0.239307	-0.296265
1.52	-0.37497	-0.294971	-0.310941	-0.241695	-0.23878	-0.294125
1.521	-0.374884	-0.294773	-0.310368	-0.241922	-0.237861	-0.291922
1.522	-0.37464	-0.294581	-0.309673	-0.242562	-0.236707	-0.290158
1.523	-0.374101	-0.294152	-0.308883	-0.243467	-0.235541	-0.288921
1.524	-0.373227	-0.293444	-0.308179	-0.244425	-0.234563	-0.287886
1.525	-0.372122	-0.292591	-0.307699	-0.245261	-0.233897	-0.286662
1.526	-0.370954	-0.29172	-0.307447	-0.245921	-0.233588	-0.285215
1.527	-0.369831	-0.290886	-0.307307	-0.246453	-0.233577	-0.283873
1.528	-0.368774	-0.290082	-0.307125	-0.246928	-0.233735	-0.283009
1.529	-0.367759	-0.289293	-0.306878	-0.247395	-0.233976	-0.282789
1.53	-0.366747	-0.28862	-0.306713	-0.247914	-0.234383	-0.283015
1.531	-0.365721	-0.288245	-0.306689	-0.248583	-0.23509	-0.283162
1.532	-0.364694	-0.288245	-0.306652	-0.249527	-0.236045	-0.282598
1.533	-0.36368	-0.288525	-0.306338	-0.250766	-0.237086	-0.280662
1.534	-0.362713	-0.288917	-0.305535	-0.252118	-0.238108	-0.27705
1.535	-0.361873	-0.289259	-0.304268	-0.253362	-0.238991	-0.272497
1.536	-0.361175	-0.289387	-0.302796	-0.254343	-0.239679	-0.268476
1.537	-0.360478	-0.289183	-0.301368	-0.254938	-0.240299	-0.266126
1.538	-0.359575	-0.2886	-0.300062	-0.255106	-0.240955	-0.265778
1.539	-0.358365	-0.287614	-0.298799	-0.254881	-0.241577	-0.267204
1.54	-0.356853	-0.286249	-0.297488	-0.254323	-0.242082	-0.269886
1.541	-0.355115	-0.284584	-0.296236	-0.253578	-0.242431	-0.273084
1.542	-0.353288	-0.28274	-0.295234	-0.252799	-0.24253	-0.275867
1.543	-0.351514	-0.280855	-0.294497	-0.251988	-0.242312	-0.277335
1.544	-0.349876	-0.279008	-0.293981	-0.251041	-0.241857	-0.277115
1.545	-0.348354	-0.277257	-0.293728	-0.249927	-0.24129	-0.275703
1.546	-0.346872	-0.275684	-0.293651	-0.248761	-0.240705	-0.274031
1.547	-0.345491	-0.274366	-0.29345	-0.247717	-0.240166	-0.272665
1.548	-0.344436	-0.273355	-0.292885	-0.246821	-0.23966	-0.271534
1.549	-0.343853	-0.272651	-0.291984	-0.245958	-0.239136	-0.270173
1.55	-0.343713	-0.272146	-0.290946	-0.245036	-0.238583	-0.268037
1.551	-0.343958	-0.271712	-0.289875	-0.243967	-0.237995	-0.264769
1.552	-0.344498	-0.271325	-0.288719	-0.24266	-0.237285	-0.260323
1.553	-0.345075	-0.270942	-0.287459	-0.241117	-0.236336	-0.254862
1.554	-0.345374	-0.270467	-0.286199	-0.239448	-0.235139	-0.248661
1.555	-0.345234	-0.269909	-0.285097	-0.237794	-0.2338	-0.242129
1.556	-0.344723	-0.269327	-0.284244	-0.236197	-0.232455	-0.235756
1.557	-0.344038	-0.268714	-0.28362	-0.234593	-0.231126	-0.229989
1.558	-0.343291	-0.268039	-0.283177	-0.232924	-0.229683	-0.225129
1.559	-0.342461	-0.26729	-0.282825	-0.231195	-0.22806	-0.221319
1.56	-0.341543	-0.266436	-0.282355	-0.229521	-0.226349	-0.218545
1.561	-0.340612	-0.265469	-0.281631	-0.228126	-0.224683	-0.216594
1.562	-0.339728	-0.264508	-0.280737	-0.227165	-0.223144	-0.215226
1.563	-0.33887	-0.263739	-0.279752	-0.226573	-0.221783	-0.214406
1.564	-0.338007	-0.263271	-0.278682	-0.226225	-0.220686	-0.214112
1.565	-0.337129	-0.263092	-0.2776	-0.226067	-0.219856	-0.214072
1.566	-0.336279	-0.263079	-0.27662	-0.22602	-0.21909	-0.213947
1.567	-0.335502	-0.263185	-0.27576	-0.225939	-0.21818	-0.213551
1.568	-0.33475	-0.263456	-0.274902	-0.225695	-0.217187	-0.21282
1.569	-0.333968	-0.263821	-0.273995	-0.225271	-0.216399	-0.211739
1.57	-0.333216	-0.264132	-0.273189	-0.224662	-0.215966	-0.210397
1.571	-0.332576	-0.264296	-0.27262	-0.223838	-0.215724	-0.209062
1.572	-0.332013	-0.264265	-0.272207	-0.222897	-0.215519	-0.208019
1.573	-0.331475	-0.264033	-0.271875	-0.222019	-0.215366	-0.207378
1.574	-0.33098	-0.263673	-0.271744	-0.221317	-0.215249	-0.207128
1.575	-0.330458	-0.263265	-0.271918	-0.220878	-0.215079	-0.207261
1.576	-0.329697	-0.262789	-0.272382	-0.220737	-0.21482	-0.207763
1.577	-0.328544	-0.262159	-0.273085	-0.220788	-0.214568	-0.208505
1.578	-0.327049	-0.261266	-0.273861	-0.220856	-0.21448	-0.209296
1.579	-0.3254	-0.260092	-0.274506	-0.220856	-0.21461	-0.21002
1.58	-0.323762	-0.258907	-0.275001	-0.220843	-0.214855	-0.210607
1.581	-0.32211	-0.258068	-0.27541	-0.220944	-0.215049	-0.210962
1.582	-0.320234	-0.25758	-0.275631	-0.22127	-0.21513	-0.211018
1.583	-0.317993	-0.257188	-0.275468	-0.221752	-0.215153	-0.210767
1.584	-0.315551	-0.256787	-0.274864	-0.22218	-0.215169	-0.210247
1.585	-0.313248	-0.256402	-0.273949	-0.22245	-0.215204	-0.209649
1.586	-0.311302	-0.255931	-0.272842	-0.222541	-0.215309	-0.20928
1.587	-0.30974	-0.25522	-0.271574	-0.222463	-0.215525	-0.209345
1.588	-0.308532	-0.254223	-0.270231	-0.222292	-0.215803	-0.209865
1.589	-0.307692	-0.252989	-0.268989	-0.222064	-0.215991	-0.210675
1.59	-0.30715	-0.251592	-0.267959	-0.221761	-0.215971	-0.211502
1.591	-0.306711	-0.25008	-0.267135	-0.221346	-0.215794	-0.212163
1.592	-0.306248	-0.248492	-0.266477	-0.220732	-0.215565	-0.212633
1.593	-0.305761	-0.246985	-0.265929	-0.219828	-0.215251	-0.212905
1.594	-0.305235	-0.245737	-0.265405	-0.218639	-0.214743	-0.212909
1.595	-0.304585	-0.24468	-0.264864	-0.217248	-0.213985	-0.21257
1.596	-0.303781	-0.243646	-0.264244	-0.215733	-0.212986	-0.211796
1.597	-0.302898	-0.242661	-0.263418	-0.214132	-0.211788	-0.210544
1.598	-0.302039	-0.241832	-0.262337	-0.212499	-0.210432	-0.208906
1.599	-0.301266	-0.241147	-0.261099	-0.210898	-0.209014	-0.20699
1.6	-0.300599	-0.24053	-0.259828	-0.209328	-0.207708	-0.204825
1.601	-0.300098	-0.239986	-0.258634	-0.207756	-0.206622	-0.202454
1.602	-0.299835	-0.239595	-0.257648	-0.206156	-0.205749	-0.200011
1.603	-0.299735	-0.239383	-0.256988	-0.204622	-0.20504	-0.197722
1.604	-0.299595	-0.239332	-0.256709	-0.203384	-0.204397	-0.195824
1.605	-0.299328	-0.239399	-0.256784	-0.20249	-0.203682	-0.1944
1.606	-0.298994	-0.239518	-0.257088	-0.201715	-0.202841	-0.193342
1.607	-0.298671	-0.239594	-0.257452	-0.200898	-0.201976	-0.19251
1.608	-0.298469	-0.239379	-0.257763	-0.200035	-0.201243	-0.191782
1.609	-0.298424	-0.238627	-0.25799	-0.199126	-0.200684	-0.191011
1.61	-0.298416	-0.237405	-0.258075	-0.198151	-0.20017	-0.190074
1.611	-0.298294	-0.235995	-0.257842	-0.197097	-0.199549	-0.189012
1.612	-0.297919	-0.234605	-0.257157	-0.195974	-0.198823	-0.187977
1.613	-0.297224	-0.233312	-0.256039	-0.194898	-0.198073	-0.187044
1.614	-0.296285	-0.232178	-0.254621	-0.194076	-0.197364	-0.186111
1.615	-0.295215	-0.231299	-0.253142	-0.193701	-0.19673	-0.185005
1.616	-0.294076	-0.230729	-0.251772	-0.193853	-0.196084	-0.183722
1.617	-0.292922	-0.230378	-0.250479	-0.194358	-0.195336	-0.182432
1.618	-0.291799	-0.230047	-0.249227	-0.194876	-0.194595	-0.181322
1.619	-0.290746	-0.229567	-0.248118	-0.195209	-0.193991	-0.180595
1.62	-0.289782	-0.228896	-0.247289	-0.19541	-0.193522	-0.180391
1.621	-0.288877	-0.228135	-0.246714	-0.195639	-0.193183	-0.180664
1.622	-0.288036	-0.227441	-0.246117	-0.195979	-0.193066	-0.181309
1.623	-0.287289	-0.226816	-0.245245	-0.196389	-0.193284	-0.182264
1.624	-0.28661	-0.226078	-0.244125	-0.196857	-0.193862	-0.183425
1.625	-0.285898	-0.225174	-0.242972	-0.197462	-0.194715	-0.184611
1.626	-0.285019	-0.224292	-0.241999	-0.19824	-0.195737	-0.185686
1.627	-0.283966	-0.223579	-0.241264	-0.199111	-0.196931	-0.186663
1.628	-0.282838	-0.222957	-0.240689	-0.199973	-0.198349	-0.18756
1.629	-0.281716	-0.222281	-0.240238	-0.200821	-0.19997	-0.188264
1.63	-0.280724	-0.221488	-0.239885	-0.201707	-0.20178	-0.18861
1.631	-0.280012	-0.220591	-0.23953	-0.202608	-0.203786	-0.188515
1.632	-0.279639	-0.219716	-0.239093	-0.203461	-0.205885	-0.187996
1.633	-0.279498	-0.21904	-0.238551	-0.204198	-0.207862	-0.18713
1.634	-0.279394	-0.218693	-0.237878	-0.204753	-0.20954	-0.186067
1.635	-0.279208	-0.218718	-0.237043	-0.205122	-0.21088	-0.185
1.636	-0.278891	-0.218987	-0.236087	-0.205284	-0.211971	-0.184101
1.637	-0.278376	-0.219164	-0.235117	-0.205132	-0.212895	-0.183502
1.638	-0.277651	-0.218987	-0.234205	-0.204615	-0.213562	-0.183266
1.639	-0.276847	-0.218516	-0.233389	-0.203822	-0.213817	-0.183411
1.64	-0.276112	-0.217983	-0.232739	-0.202927	-0.213657	-0.183944
1.641	-0.275493	-0.217572	-0.232344	-0.202071	-0.213193	-0.184831
1.642	-0.274946	-0.21739	-0.232212	-0.201244	-0.212603	-0.186004
1.643	-0.274343	-0.217505	-0.232236	-0.200323	-0.21204	-0.187324
1.644	-0.273545	-0.217871	-0.232269	-0.199196	-0.211481	-0.188551
1.645	-0.27247	-0.218294	-0.232222	-0.197798	-0.210874	-0.18942
1.646	-0.271127	-0.218581	-0.232072	-0.196159	-0.210207	-0.189767
1.647	-0.269658	-0.218617	-0.231782	-0.194385	-0.209403	-0.189692
1.648	-0.268245	-0.218297	-0.231374	-0.192546	-0.208438	-0.189502
1.649	-0.266898	-0.217578	-0.23095	-0.190721	-0.207418	-0.189379
1.65	-0.265499	-0.216563	-0.230515	-0.189003	-0.206398	-0.189296
1.651	-0.26407	-0.215422	-0.229913	-0.187366	-0.205307	-0.189169
1.652	-0.2628	-0.214291	-0.229008	-0.185726	-0.204111	-0.1889
1.653	-0.261776	-0.213307	-0.22788	-0.184141	-0.202858	-0.188394
1.654	-0.260952	-0.212547	-0.226791	-0.182772	-0.201531	-0.187572
1.655	-0.260327	-0.21188	-0.225995	-0.181622	-0.200071	-0.186338
1.656	-0.25992	-0.211107	-0.225599	-0.180509	-0.198573	-0.184645
1.657	-0.25969	-0.210206	-0.225609	-0.17932	-0.197231	-0.182643
1.658	-0.259644	-0.209313	-0.226006	-0.178106	-0.196099	-0.180719
1.659	-0.259849	-0.20854	-0.22663	-0.176923	-0.195034	-0.179245
1.66	-0.260261	-0.207889	-0.227185	-0.175805	-0.193873	-0.178236
1.661	-0.260617	-0.207325	-0.227481	-0.174824	-0.192537	-0.177451
1.662	-0.2606	-0.206854	-0.227571	-0.173986	-0.190994	-0.176734
1.663	-0.260084	-0.206537	-0.227591	-0.173209	-0.189254	-0.176089
1.664	-0.259191	-0.206437	-0.227549	-0.172452	-0.187426	-0.175572
1.665	-0.258097	-0.206561	-0.227338	-0.171761	-0.185582	-0.175151
1.666	-0.256886	-0.206871	-0.226906	-0.171268	-0.183526	-0.174649
1.667	-0.255624	-0.2073	-0.226284	-0.171171	-0.180906	-0.173952
1.668	-0.254492	-0.207763	-0.225524	-0.171531	-0.177578	-0.173129
1.669	-0.253696	-0.208174	-0.224641	-0.172192	-0.173712	-0.17233
1.67	-0.253245	-0.208434	-0.223612	-0.172981	-0.169627	-0.171652
1.671	-0.253022	-0.208466	-0.222456	-0.173857	-0.165599	-0.171073
1.672	-0.252911	-0.208304	-0.221311	-0.174802	-0.16186	-0.170529
1.673	-0.252666	-0.208087	-0.220363	-0.175617	-0.1587	-0.17005
1.674	-0.252111	-0.207944	-0.219741	-0.176009	-0.156356	-0.169798
1.675	-0.25141	-0.207865	-0.219487	-0.175928	-0.15484	-0.169864
1.676	-0.250685	-0.207736	-0.219433	-0.175624	-0.154017	-0.170093
1.677	-0.249768	-0.207545	-0.219215	-0.175439	-0.153811	-0.17021
1.678	-0.248568	-0.207286	-0.218594	-0.175657	-0.154192	-0.170097
1.679	-0.247217	-0.206849	-0.217574	-0.176399	-0.154969	-0.16984
1.68	-0.245747	-0.206233	-0.216341	-0.177547	-0.155833	-0.169542
1.681	-0.244054	-0.205527	-0.215214	-0.178947	-0.156598	-0.169179
1.682	-0.242225	-0.20474	-0.21443	-0.180579	-0.157273	-0.16871
1.683	-0.240502	-0.203936	-0.213999	-0.182379	-0.157903	-0.168258
1.684	-0.239023	-0.203288	-0.213792	-0.184166	-0.158491	-0.168002
1.685	-0.237821	-0.202885	-0.213679	-0.185717	-0.15908	-0.167956
1.686	-0.236887	-0.202663	-0.213612	-0.186786	-0.159742	-0.168035
1.687	-0.236189	-0.20248	-0.213607	-0.187187	-0.160438	-0.168244
1.688	-0.235681	-0.202204	-0.213638	-0.186979	-0.161	-0.168576
1.689	-0.235334	-0.201768	-0.213601	-0.186344	-0.161338	-0.168916
1.69	-0.235199	-0.201152	-0.213413	-0.185331	-0.161485	-0.169174
1.691	-0.235271	-0.200358	-0.213117	-0.183965	-0.161384	-0.169364
1.692	-0.235413	-0.199433	-0.212843	-0.182404	-0.160949	-0.169541
1.693	-0.235469	-0.198461	-0.212742	-0.180802	-0.160234	-0.169763
1.694	-0.235369	-0.197598	-0.212889	-0.179294	-0.15928	-0.170056
1.695	-0.235191	-0.197017	-0.213098	-0.177933	-0.158117	-0.170458
1.696	-0.235093	-0.19677	-0.212957	-0.176588	-0.156929	-0.171014
1.697	-0.235134	-0.196751	-0.2122	-0.175141	-0.155901	-0.171588
1.698	-0.235334	-0.196753	-0.210953	-0.173632	-0.155026	-0.171863
1.699	-0.235761	-0.196565	-0.2096	-0.172179	-0.154212	-0.171639
1.7	-0.236361	-0.196093	-0.208475	-0.170883	-0.15345	-0.170921
1.701	-0.236911	-0.195444	-0.207675	-0.169753	-0.15278	-0.169715
1.702	-0.237233	-0.194775	-0.207132	-0.168738	-0.152113	-0.167962
1.703	-0.23731	-0.194137	-0.206793	-0.167771	-0.151269	-0.165663
1.704	-0.237259	-0.193524	-0.206624	-0.166703	-0.150144	-0.162915
1.705	-0.237237	-0.192898	-0.206585	-0.16543	-0.14876	-0.159854
1.706	-0.237344	-0.19222	-0.206675	-0.16398	-0.147203	-0.156612
1.707	-0.237563	-0.191531	-0.20688	-0.162393	-0.145589	-0.153265
1.708	-0.237749	-0.190911	-0.207171	-0.160758	-0.144045	-0.149906
1.709	-0.237761	-0.190401	-0.207537	-0.159281	-0.14265	-0.14673
1.71	-0.237555	-0.190079	-0.207902	-0.158165	-0.141364	-0.143922
1.711	-0.237185	-0.19003	-0.208136	-0.15754	-0.140066	-0.141531
1.712	-0.23675	-0.190176	-0.208155	-0.157466	-0.138691	-0.139552
1.713	-0.236333	-0.190384	-0.207871	-0.157913	-0.137386	-0.138027
1.714	-0.235951	-0.190608	-0.207197	-0.158777	-0.136518	-0.137003
1.715	-0.235533	-0.190775	-0.20617	-0.159928	-0.136366	-0.136503
1.716	-0.234968	-0.190737	-0.205032	-0.161204	-0.13683	-0.136534
1.717	-0.234247	-0.190396	-0.204041	-0.16244	-0.137549	-0.136978
1.718	-0.233511	-0.18982	-0.203246	-0.163484	-0.138228	-0.137603
1.719	-0.232853	-0.189225	-0.202569	-0.164279	-0.138722	-0.138302
1.72	-0.232237	-0.188789	-0.20192	-0.164869	-0.138993	-0.139134
1.721	-0.231631	-0.188523	-0.201248	-0.165276	-0.139105	-0.140079
1.722	-0.231063	-0.188354	-0.200644	-0.165569	-0.139215	-0.140978
1.723	-0.230536	-0.188231	-0.200302	-0.165899	-0.139492	-0.141648
1.724	-0.230003	-0.188152	-0.200355	-0.166352	-0.140007	-0.142019
1.725	-0.229452	-0.188132	-0.200753	-0.16694	-0.140632	-0.142141
1.726	-0.228897	-0.188088	-0.201243	-0.167649	-0.141172	-0.142026
1.727	-0.228265	-0.187804	-0.201566	-0.168446	-0.141604	-0.141662
1.728	-0.227413	-0.187138	-0.201636	-0.169337	-0.142026	-0.141156
1.729	-0.226237	-0.186218	-0.20155	-0.170257	-0.142441	-0.140704
1.73	-0.224791	-0.185339	-0.201441	-0.170997	-0.142817	-0.140457
1.731	-0.223297	-0.184706	-0.201306	-0.171498	-0.143189	-0.140423
1.732	-0.221966	-0.184347	-0.20103	-0.17196	-0.14361	-0.140486
1.733	-0.220818	-0.184244	-0.200585	-0.172568	-0.14415	-0.140571
1.734	-0.219798	-0.18426	-0.20009	-0.173346	-0.144871	-0.140736
1.735	-0.219007	-0.184124	-0.199659	-0.174237	-0.145765	-0.141077
1.736	-0.218606	-0.183769	-0.199269	-0.17516	-0.146701	-0.141635
1.737	-0.218642	-0.183425	-0.198782	-0.176004	-0.147527	-0.142391
1.738	-0.219034	-0.183217	-0.198072	-0.176608	-0.148233	-0.143283
1.739	-0.219524	-0.183051	-0.197136	-0.176802	-0.148888	-0.144175
1.74	-0.219813	-0.182917	-0.196118	-0.176556	-0.149535	-0.144879
1.741	-0.219826	-0.18287	-0.195246	-0.175987	-0.150153	-0.145352
1.742	-0.219652	-0.182835	-0.194717	-0.175223	-0.15195	-0.14575
1.743	-0.219344	-0.182691	-0.194595	-0.174277	-0.159488	-0.146186
1.744	-0.218921	-0.182472	-0.194804	-0.173052	-0.17798	-0.146591
1.745	-0.218424	-0.182308	-0.195109	-0.17151	-0.207015	-0.146827
1.746	-0.217923	-0.182211	-0.195142	-0.169777	-0.240158	-0.146867
1.747	-0.217551	-0.182085	-0.194725	-0.168091	-0.26994	-0.14677
1.748	-0.217461	-0.181929	-0.194052	-0.166648	-0.291116	-0.146534
1.749	-0.217674	-0.181831	-0.193468	-0.165452	-0.301204	-0.146114
1.75	-0.218057	-0.181771	-0.193253	-0.164336	-0.300064	-0.145529
1.751	-0.218473	-0.181582	-0.193484	-0.163094	-0.28916	-0.144854
1.752	-0.2189	-0.18112	-0.194012	-0.161635	-0.270812	-0.144124
1.753	-0.219328	-0.180374	-0.194645	-0.16005	-0.247619	-0.143311
1.754	-0.21973	-0.179483	-0.195251	-0.158471	-0.222187	-0.142409
1.755	-0.220146	-0.178656	-0.195738	-0.156989	-0.196959	-0.141477
1.756	-0.220593	-0.178023	-0.196017	-0.1557	-0.173857	-0.14056
1.757	-0.220963	-0.17762	-0.19605	-0.154619	-0.154059	-0.139595
1.758	-0.22122	-0.177487	-0.195886	-0.15366	-0.138155	-0.13854
1.759	-0.221578	-0.177655	-0.195644	-0.15276	-0.126423	-0.137472
1.76	-0.222183	-0.178075	-0.19545	-0.151948	-0.118917	-0.13646
1.761	-0.222841	-0.178654	-0.195294	-0.151299	-0.115334	-0.135557
1.762	-0.22323	-0.179264	-0.195005	-0.15078	-0.115025	-0.134798
1.763	-0.223169	-0.179741	-0.194509	-0.150267	-0.117166	-0.134074
1.764	-0.222714	-0.179924	-0.19393	-0.149735	-0.120811	-0.133234
1.765	-0.222088	-0.179749	-0.193341	-0.149294	-0.124973	-0.132322
1.766	-0.221418	-0.179379	-0.192664	-0.14908	-0.12886	-0.131597
1.767	-0.220638	-0.179167	-0.19181	-0.149215	-0.132065	-0.131257
1.768	-0.219768	-0.179315	-0.190783	-0.149734	-0.134493	-0.131277
1.769	-0.218994	-0.179667	-0.189725	-0.15045	-0.136126	-0.133086
1.77	-0.218484	-0.17991	-0.188842	-0.151105	-0.136964	-0.140845
1.771	-0.218252	-0.179889	-0.188257	-0.151657	-0.137094	-0.157137
1.772	-0.21819	-0.179717	-0.187939	-0.152157	-0.136703	-0.179172
1.773	-0.218126	-0.179566	-0.187793	-0.152607	-0.136009	-0.20168
1.774	-0.217883	-0.179416	-0.187835	-0.153084	-0.135158	-0.220387
1.775	-0.217339	-0.179091	-0.188169	-0.153649	-0.134287	-0.232749
1.776	-0.216496	-0.178472	-0.188839	-0.154274	-0.133622	-0.23787
1.777	-0.21549	-0.177525	-0.189776	-0.155011	-0.133432	-0.236137
1.778	-0.214455	-0.176292	-0.190777	-0.155967	-0.133887	-0.228717
1.779	-0.213382	-0.17491	-0.191574	-0.157113	-0.135078	-0.217235
1.78	-0.212221	-0.173545	-0.192044	-0.158329	-0.137075	-0.203497
1.781	-0.211043	-0.17236	-0.192203	-0.159623	-0.139776	-0.189081
1.782	-0.210041	-0.17145	-0.191994	-0.161105	-0.142904	-0.175171
1.783	-0.209282	-0.170781	-0.191375	-0.162732	-0.146103	-0.162657
1.784	-0.208643	-0.170295	-0.190396	-0.164256	-0.148992	-0.152237
1.785	-0.208068	-0.169968	-0.189094	-0.165443	-0.151334	-0.144385
1.786	-0.207635	-0.169837	-0.187568	-0.166185	-0.153058	-0.13919
1.787	-0.207363	-0.170022	-0.18603	-0.166383	-0.154102	-0.136339
1.788	-0.207187	-0.170533	-0.184687	-0.165877	-0.154418	-0.135303
1.789	-0.207029	-0.171188	-0.183649	-0.164641	-0.1541	-0.135642
1.79	-0.206769	-0.171766	-0.18282	-0.162877	-0.153328	-0.137072
1.791	-0.206275	-0.172071	-0.181992	-0.160828	-0.152203	-0.13928
1.792	-0.205469	-0.17191	-0.181036	-0.158629	-0.15076	-0.141905
1.793	-0.204369	-0.171167	-0.179913	-0.156373	-0.149127	-0.144576
1.794	-0.203134	-0.169942	-0.178646	-0.154199	-0.147507	-0.146944
1.795	-0.202002	-0.168461	-0.177315	-0.152265	-0.146104	-0.148758
1.796	-0.201087	-0.166812	-0.17605	-0.150577	-0.14504	-0.149864
1.797	-0.200356	-0.164969	-0.174971	-0.149007	-0.144316	-0.150194
1.798	-0.199831	-0.16305	-0.174154	-0.14746	-0.143884	-0.149798
1.799	-0.19958	-0.161375	-0.173688	-0.14592	-0.143704	-0.148808
1.8	-0.199533	-0.160239	-0.173595	-0.144468	-0.143755	-0.147408
1.801	-0.19952	-0.159622	-0.173757	-0.143294	-0.143985	-0.14571
1.802	-0.199475	-0.159298	-0.173976	-0.142535	-0.144212	-0.143636
1.803	-0.199505	-0.15919	-0.174153	-0.142032	-0.144232	-0.141149
1.804	-0.199712	-0.159341	-0.174353	-0.14137	-0.14405	-0.138453
1.805	-0.200025	-0.159679	-0.174582	-0.140257	-0.143854	-0.135737
1.806	-0.200293	-0.160078	-0.174753	-0.138752	-0.143779	-0.133079
1.807	-0.20052	-0.16047	-0.174807	-0.137133	-0.143822	-0.130613
1.808	-0.200838	-0.160773	-0.174663	-0.13567	-0.143963	-0.128473
1.809	-0.201253	-0.160885	-0.174296	-0.134529	-0.14427	-0.1267
1.81	-0.201657	-0.160763	-0.173829	-0.133746	-0.144808	-0.125292
1.811	-0.202006	-0.160459	-0.173403	-0.133194	-0.14552	-0.124213
1.812	-0.202329	-0.160097	-0.173086	-0.132718	-0.146304	-0.12337
1.813	-0.202574	-0.159759	-0.172847	-0.13238	-0.147054	-0.122638
1.814	-0.202522	-0.15949	-0.172603	-0.132343	-0.14768	-0.121937
1.815	-0.201996	-0.159383	-0.17233	-0.132671	-0.148195	-0.12126
1.816	-0.201101	-0.159448	-0.172101	-0.133288	-0.148626	-0.120566
1.817	-0.200117	-0.159525	-0.172029	-0.133998	-0.148891	-0.119825
1.818	-0.199255	-0.15952	-0.172154	-0.134638	-0.148855	-0.119166
1.819	-0.198571	-0.159496	-0.172384	-0.135256	-0.148412	-0.118746
1.82	-0.197969	-0.159481	-0.172626	-0.136024	-0.147489	-0.118508
1.821	-0.197326	-0.159426	-0.172864	-0.13705	-0.146045	-0.118345
1.822	-0.196574	-0.159354	-0.17308	-0.138307	-0.144179	-0.118337
1.823	-0.195704	-0.159361	-0.173212	-0.139656	-0.142132	-0.118573
1.824	-0.194759	-0.159512	-0.173226	-0.140925	-0.140122	-0.119016
1.825	-0.193814	-0.159811	-0.173133	-0.141983	-0.138306	-0.119645
1.826	-0.192907	-0.160134	-0.172901	-0.142784	-0.136878	-0.120534
1.827	-0.191963	-0.160302	-0.172499	-0.143427	-0.135975	-0.121722
1.828	-0.190852	-0.160212	-0.172	-0.144095	-0.135485	-0.1231
1.829	-0.189527	-0.159848	-0.171509	-0.144924	-0.135107	-0.124499
1.83	-0.188092	-0.159336	-0.171007	-0.145958	-0.13461	-0.125819
1.831	-0.186722	-0.158879	-0.17042	-0.147164	-0.133935	-0.127043
1.832	-0.185509	-0.15847	-0.16974	-0.148463	-0.133125	-0.128244
1.833	-0.184477	-0.157889	-0.168995	-0.14981	-0.132154	-0.129516
1.834	-0.183661	-0.157109	-0.168205	-0.151197	-0.130837	-0.130939
1.835	-0.183075	-0.156351	-0.16743	-0.15259	-0.129039	-0.132613
1.836	-0.182662	-0.155727	-0.166809	-0.153919	-0.126878	-0.134604
1.837	-0.182309	-0.15514	-0.166457	-0.155085	-0.124617	-0.136862
1.838	-0.181976	-0.154503	-0.166363	-0.155915	-0.122444	-0.139281
1.839	-0.181773	-0.153887	-0.166472	-0.15625	-0.120417	-0.141738
1.84	-0.181787	-0.153457	-0.166717	-0.156055	-0.11848	-0.144116
1.841	-0.181982	-0.153259	-0.167035	-0.155368	-0.116467	-0.146342
1.842	-0.182337	-0.153164	-0.16746	-0.154247	-0.114221	-0.148391
1.843	-0.182833	-0.153035	-0.168037	-0.152788	-0.111708	-0.150249
1.844	-0.183309	-0.152783	-0.168694	-0.151121	-0.109026	-0.151876
1.845	-0.183582	-0.152375	-0.169319	-0.149296	-0.106403	-0.153177
1.846	-0.183614	-0.151856	-0.169781	-0.147275	-0.104062	-0.154043
1.847	-0.183432	-0.151286	-0.169925	-0.145078	-0.102062	-0.154476
1.848	-0.18304	-0.15068	-0.169706	-0.142824	-0.100399	-0.154542
1.849	-0.182501	-0.150048	-0.169224	-0.140606	-0.0990854	-0.154202
1.85	-0.181976	-0.149489	-0.168592	-0.138523	-0.098057	-0.153366
1.851	-0.18161	-0.149068	-0.167921	-0.136695	-0.0972235	-0.152035
1.852	-0.181448	-0.148735	-0.167348	-0.13507	-0.0965929	-0.150304
1.853	-0.18145	-0.148517	-0.166952	-0.133512	-0.09619	-0.148286
1.854	-0.18159	-0.148439	-0.166776	-0.132066	-0.0959734	-0.1461
1.855	-0.18189	-0.148381	-0.166877	-0.130809	-0.0958972	-0.143917
1.856	-0.182311	-0.14834	-0.167284	-0.129608	-0.095931	-0.141939
1.857	-0.182704	-0.148514	-0.167946	-0.128343	-0.0960282	-0.140254
1.858	-0.183016	-0.148968	-0.168737	-0.127123	-0.0961496	-0.138817
1.859	-0.183371	-0.149483	-0.169538	-0.126082	-0.096246	-0.137609
1.86	-0.183888	-0.149777	-0.170209	-0.125204	-0.0962628	-0.136668
1.861	-0.184558	-0.149764	-0.170595	-0.12439	-0.0962221	-0.135942
1.862	-0.185246	-0.149533	-0.170666	-0.123578	-0.0961995	-0.135279
1.863	-0.185749	-0.149178	-0.170479	-0.122759	-0.096226	-0.134467
1.864	-0.185922	-0.148797	-0.170056	-0.12194	-0.0962334	-0.133296
1.865	-0.185754	-0.148517	-0.169406	-0.121151	-0.0961472	-0.131715
1.866	-0.185259	-0.14847	-0.168572	-0.120492	-0.0960419	-0.129855
1.867	-0.184427	-0.148729	-0.167584	-0.120158	-0.0960694	-0.127893
1.868	-0.183341	-0.149183	-0.166465	-0.120358	-0.0962144	-0.125955
1.869	-0.182145	-0.149533	-0.165319	-0.121107	-0.0963093	-0.124011
1.87	-0.181022	-0.149602	-0.164316	-0.122227	-0.0963468	-0.121969
1.871	-0.180189	-0.14951	-0.163561	-0.123586	-0.0965591	-0.119954
1.872	-0.179647	-0.149373	-0.163051	-0.125125	-0.0971261	-0.118242
1.873	-0.179281	-0.149136	-0.162715	-0.126735	-0.0979568	-0.117039
1.874	-0.17915	-0.148807	-0.162472	-0.128294	-0.098819	-0.116487
1.875	-0.179299	-0.148485	-0.162311	-0.129747	-0.0996129	-0.116629
1.876	-0.179669	-0.148165	-0.162262	-0.131085	-0.100424	-0.11724
1.877	-0.180298	-0.147677	-0.162301	-0.132299	-0.101335	-0.117909
1.878	-0.181167	-0.146906	-0.16233	-0.133376	-0.102323	-0.118343
1.879	-0.182025	-0.146026	-0.162215	-0.134278	-0.103316	-0.118394
1.88	-0.182626	-0.145322	-0.161822	-0.134904	-0.104238	-0.118008
1.881	-0.182894	-0.144819	-0.161093	-0.135188	-0.105003	-0.117274
1.882	-0.182789	-0.144385	-0.160097	-0.1352	-0.10558	-0.116349
1.883	-0.182223	-0.144056	-0.158929	-0.135092	-0.106056	-0.115371
1.884	-0.181172	-0.144045	-0.157658	-0.134925	-0.106481	-0.114516
1.885	-0.179726	-0.144465	-0.156358	-0.134671	-0.106701	-0.114008
1.886	-0.178041	-0.145139	-0.155141	-0.134373	-0.106597	-0.113986
1.887	-0.17634	-0.145807	-0.154234	-0.134158	-0.106366	-0.114451
1.888	-0.174856	-0.146287	-0.153924	-0.134097	-0.106313	-0.115321
1.889	-0.17365	-0.146341	-0.154309	-0.134098	-0.106571	-0.116431
1.89	-0.172638	-0.145737	-0.155242	-0.133948	-0.107135	-0.117571
1.891	-0.171728	-0.144498	-0.156473	-0.133445	-0.107971	-0.118598
1.892	-0.17081	-0.142873	-0.157799	-0.132564	-0.109094	-0.11952
1.893	-0.169838	-0.141112	-0.159058	-0.131455	-0.110539	-0.120428
1.894	-0.168912	-0.139412	-0.160121	-0.130246	-0.112148	-0.121284
1.895	-0.168147	-0.137944	-0.160942	-0.128911	-0.113575	-0.121913
1.896	-0.167574	-0.136817	-0.161564	-0.127384	-0.114598	-0.122205
1.897	-0.167113	-0.136048	-0.162073	-0.125755	-0.115239	-0.122092
1.898	-0.166618	-0.135533	-0.162464	-0.124202	-0.11561	-0.121628
1.899	-0.166025	-0.135095	-0.162632	-0.122793	-0.115754	-0.12109
1.9	-0.165455	-0.134631	-0.162425	-0.121502	-0.11557	-0.1207
1.901	-0.16508	-0.134173	-0.161637	-0.120356	-0.114891	-0.120449
1.902	-0.164936	-0.133877	-0.160209	-0.119394	-0.113711	-0.120191
1.903	-0.16494	-0.133927	-0.158335	-0.118549	-0.112223	-0.119831
1.904	-0.165074	-0.134415	-0.156264	-0.117735	-0.110611	-0.119434
1.905	-0.16542	-0.135333	-0.154192	-0.116979	-0.109006	-0.119078
1.906	-0.166031	-0.136574	-0.152281	-0.116384	-0.107471	-0.118766
1.907	-0.166774	-0.137925	-0.150703	-0.116028	-0.106014	-0.11854
1.908	-0.167491	-0.139099	-0.149589	-0.115923	-0.104688	-0.118488
1.909	-0.168197	-0.139894	-0.148932	-0.116043	-0.103588	-0.118697
1.91	-0.168982	-0.140292	-0.148666	-0.116371	-0.102736	-0.119244
1.911	-0.169821	-0.140375	-0.148689	-0.116906	-0.102033	-0.120153
1.912	-0.170593	-0.140269	-0.148804	-0.117649	-0.101336	-0.121396
1.913	-0.171241	-0.140137	-0.148841	-0.118569	-0.100583	-0.122947
1.914	-0.171755	-0.14007	-0.148806	-0.119631	-0.0997522	-0.124762
1.915	-0.172051	-0.140083	-0.148751	-0.120819	-0.0987312	-0.126693
1.916	-0.172068	-0.140189	-0.148666	-0.122086	-0.0973998	-0.128567
1.917	-0.171795	-0.140421	-0.148527	-0.123365	-0.0957995	-0.130356
1.918	-0.171199	-0.140829	-0.148238	-0.124634	-0.0940999	-0.1321
1.919	-0.170293	-0.14146	-0.147735	-0.125853	-0.0924548	-0.133771
1.92	-0.169173	-0.142253	-0.147161	-0.126922	-0.0910692	-0.135282
1.921	-0.167963	-0.142978	-0.146711	-0.127758	-0.0902342	-0.136512
1.922	-0.166862	-0.143316	-0.146413	-0.128441	-0.0900901	-0.137356
1.923	-0.166082	-0.143018	-0.146215	-0.129186	-0.090548	-0.137801
1.924	-0.165693	-0.14206	-0.146104	-0.130109	-0.091469	-0.137888
1.925	-0.165628	-0.140665	-0.146022	-0.131168	-0.0927802	-0.137573
1.926	-0.165826	-0.139165	-0.145912	-0.13224	-0.0944853	-0.136729
1.927	-0.166235	-0.137771	-0.145771	-0.133149	-0.0965972	-0.135239
1.928	-0.166691	-0.136507	-0.145635	-0.133794	-0.0990705	-0.133058
1.929	-0.167037	-0.135373	-0.145565	-0.134181	-0.101775	-0.130299
1.93	-0.167218	-0.134488	-0.145507	-0.134354	-0.104525	-0.127253
1.931	-0.167089	-0.134025	-0.145293	-0.134461	-0.10719	-0.124258
1.932	-0.166533	-0.134047	-0.144866	-0.134723	-0.109657	-0.121596
1.933	-0.165704	-0.134457	-0.14442	-0.135225	-0.111719	-0.119464
1.934	-0.164851	-0.135079	-0.144246	-0.135849	-0.113128	-0.117879
1.935	-0.164106	-0.135723	-0.144377	-0.136457	-0.113784	-0.116746
1.936	-0.163454	-0.13626	-0.144677	-0.137067	-0.11383	-0.116075
1.937	-0.162831	-0.136603	-0.145116	-0.137725	-0.113476	-0.115896
1.938	-0.162239	-0.136657	-0.145676	-0.138296	-0.112925	-0.116122
1.939	-0.161707	-0.136349	-0.146266	-0.138512	-0.112395	-0.11658
1.94	-0.161154	-0.135628	-0.146817	-0.138201	-0.112018	-0.116966
1.941	-0.160433	-0.134503	-0.14732	-0.137401	-0.111819	-0.11698
1.942	-0.159533	-0.133089	-0.147781	-0.136208	-0.111734	-0.116558
1.943	-0.158559	-0.13152	-0.148121	-0.134612	-0.111667	-0.115811
1.944	-0.15758	-0.129891	-0.148217	-0.132536	-0.111573	-0.11486
1.945	-0.15666	-0.128341	-0.148031	-0.129943	-0.111427	-0.113781
1.946	-0.155942	-0.127057	-0.147591	-0.126952	-0.111196	-0.112567
1.947	-0.15557	-0.126136	-0.146978	-0.123838	-0.110836	-0.111171
1.948	-0.155532	-0.125616	-0.14638	-0.12085	-0.110275	-0.109604
1.949	-0.155631	-0.125546	-0.14594	-0.118082	-0.109454	-0.107968
1.95	-0.155718	-0.125898	-0.145579	-0.115535	-0.108336	-0.106368
1.951	-0.155875	-0.126524	-0.14519	-0.113253	-0.106888	-0.104859
1.952	-0.156259	-0.127272	-0.144802	-0.111321	-0.1051	-0.103515
1.953	-0.156882	-0.128097	-0.144488	-0.109788	-0.102992	-0.102384
1.954	-0.157676	-0.128999	-0.144269	-0.108588	-0.10067	-0.101393
1.955	-0.158579	-0.129923	-0.144131	-0.107604	-0.0983065	-0.100461
1.956	-0.159474	-0.130745	-0.144123	-0.106815	-0.0960498	-0.0996004
1.957	-0.160279	-0.131299	-0.144359	-0.106213	-0.0940095	-0.0988555
1.958	-0.160978	-0.131419	-0.144854	-0.105648	-0.0922398	-0.0982473
1.959	-0.161504	-0.131019	-0.14548	-0.104849	-0.0907519	-0.0977349
1.96	-0.16179	-0.130211	-0.146115	-0.103614	-0.0896001	-0.0971771
1.961	-0.161786	-0.12927	-0.146707	-0.101979	-0.0889312	-0.0964479
1.962	-0.161463	-0.128376	-0.147138	-0.100187	-0.0888255	-0.095535
1.963	-0.16087	-0.127544	-0.147187	-0.0985419	-0.0890786	-0.094485
1.964	-0.160032	-0.126877	-0.146701	-0.0972487	-0.0893651	-0.0933436
1.965	-0.158906	-0.126506	-0.145666	-0.0963291	-0.0894972	-0.092122
1.966	-0.157529	-0.126312	-0.144221	-0.0957695	-0.0894183	-0.0907879
1.967	-0.156062	-0.126108	-0.142632	-0.0956931	-0.0891878	-0.0893296
1.968	-0.154712	-0.125878	-0.141196	-0.096224	-0.0888704	-0.0877913
1.969	-0.153607	-0.125649	-0.140118	-0.0973119	-0.0883868	-0.0862689
1.97	-0.152754	-0.12541	-0.139394	-0.0987816	-0.0876543	-0.0849167
1.971	-0.15209	-0.125185	-0.138888	-0.100444	-0.0867315	-0.0838401
1.972	-0.151586	-0.125053	-0.13847	-0.102154	-0.0857775	-0.083057
1.973	-0.151309	-0.125024	-0.138042	-0.103776	-0.0850365	-0.0826146
1.974	-0.15137	-0.124979	-0.137619	-0.105153	-0.0847632	-0.0825541
1.975	-0.151804	-0.124858	-0.137343	-0.106218	-0.08507	-0.0828178
1.976	-0.152499	-0.12471	-0.137299	-0.107079	-0.0858905	-0.0833178
1.977	-0.153295	-0.124543	-0.137395	-0.107933	-0.0870864	-0.0840487
1.978	-0.154043	-0.124353	-0.137486	-0.10894	-0.0885538	-0.0851185
1.979	-0.154515	-0.124131	-0.137517	-0.110146	-0.0901964	-0.0866323
1.98	-0.154466	-0.12388	-0.137495	-0.111526	-0.091868	-0.0885472
1.981	-0.153828	-0.123725	-0.137416	-0.11301	-0.0934554	-0.0907273
1.982	-0.152804	-0.123793	-0.137199	-0.11451	-0.0949507	-0.0930472
1.983	-0.151722	-0.124006	-0.136704	-0.115989	-0.0963567	-0.0953675
1.984	-0.150766	-0.124214	-0.135915	-0.11747	-0.0976287	-0.0975234
1.985	-0.149878	-0.124379	-0.135023	-0.118927	-0.0986981	-0.0994139
1.986	-0.148928	-0.124488	-0.134214	-0.120234	-0.0994351	-0.101073
1.987	-0.147923	-0.124468	-0.133534	-0.121283	-0.09968	-0.102572
1.988	-0.147051	-0.124332	-0.132986	-0.122001	-0.099368	-0.103889
1.989	-0.146506	-0.124231	-0.132618	-0.122265	-0.0986244	-0.104983
1.99	-0.146308	-0.124239	-0.132504	-0.122024	-0.0977982	-0.105886
1.991	-0.146337	-0.124229	-0.132702	-0.121439	-0.0973044	-0.106637
1.992	-0.146423	-0.124037	-0.133234	-0.120728	-0.097342	-0.1072
1.993	-0.146435	-0.123583	-0.134039	-0.119976	-0.0977815	-0.107559
1.994	-0.146343	-0.12285	-0.134955	-0.119121	-0.0983682	-0.107717
1.995	-0.146147	-0.121966	-0.135825	-0.11803	-0.0989548	-0.107522
1.996	-0.145818	-0.121174	-0.136592	-0.116624	-0.0994905	-0.106803
1.997	-0.145365	-0.12058	-0.137299	-0.11494	-0.099957	-0.105653
1.998	-0.144845	-0.120084	-0.137995	-0.113036	-0.100343	-0.104422
[truncated: 1,001 more rows]

## Sheet: V496M_SEC_profile
volume (mL)	absorbance (mAU)
0	12.3141
0.000499	18.4578
0.000998	18.5895
0.001497	18.7506
0.001996	18.9493
0.002495	19.1643
0.002994	19.3717
0.003493	19.5713
0.003992	19.7593
0.004491	19.9337
0.00499	20.0948
0.00549	20.2383
0.005989	20.3723
0.006488	20.4971
0.006987	20.6142
0.007486	20.7285
0.007985	20.8363
0.008484	20.937
0.008983	21.0326
0.009482	21.1242
0.009981	21.214
0.01048	21.3011
0.010979	21.3833
0.011478	21.4632
0.011977	21.5408
0.012476	21.618
0.012975	21.6919
0.013474	21.7653
0.013973	21.8359
0.014472	21.9046
0.014971	21.9719
0.015471	22.0373
0.01597	22.0986
0.016469	22.1527
0.016968	22.2001
0.017467	22.2402
0.017966	22.2737
0.018465	22.303
0.018964	22.3289
0.019463	22.3546
0.019962	22.381
0.020461	22.4107
0.02096	22.4445
0.021459	22.4672
0.021958	22.4686
0.022457	22.4571
0.022956	22.4322
0.023455	22.406
0.023954	22.3966
0.024453	22.3968
0.024952	22.4024
0.025452	22.3727
0.025951	22.1385
0.02645	21.8556
0.026949	21.7473
0.027448	21.6524
0.027947	21.5737
0.028446	21.5093
0.028945	21.4567
0.029444	21.4166
0.029943	21.3891
0.030442	21.3711
0.030941	21.3632
0.03144	21.3642
0.031939	21.3728
0.032438	21.3887
0.032937	21.4085
0.033436	21.4304
0.033935	21.4544
0.034434	21.4813
0.034933	21.5114
0.035432	21.5451
0.035932	21.5832
0.036431	21.6252
0.03693	21.6696
0.037429	21.717
0.037928	21.768
0.038427	21.8225
0.038926	21.8812
0.039425	21.9463
0.039924	22.0214
0.040423	22.1047
0.040922	22.1941
0.041421	22.2908
0.04192	22.3925
0.042419	22.4929
0.042918	22.5949
0.043417	22.6999
0.043916	22.8009
0.044415	22.9007
0.044914	23.0003
0.045413	23.0992
0.045913	23.1984
0.046412	23.2904
0.046911	23.3765
0.04741	23.4577
0.047909	23.5322
0.048408	23.6011
0.048907	23.6626
0.049406	23.7255
0.049905	23.7798
0.050404	23.8289
0.050903	23.8773
0.051402	23.9206
0.051901	23.9609
0.0524	23.9988
0.052899	24.0305
0.053398	24.0614
0.053897	24.0905
0.054396	24.1145
0.054895	24.1364
0.055394	24.1558
0.055894	24.1721
0.056393	24.1832
0.056892	24.19
0.057391	24.1941
0.05789	24.1948
0.058389	24.1972
0.058888	24.1971
0.059387	24.1986
0.059886	24.1994
0.060385	24.1975
0.060884	24.1924
0.061383	24.1827
0.061882	24.1703
0.062381	24.1538
0.06288	24.1355
0.063379	24.1147
0.063878	24.093
0.064377	24.0682
0.064876	24.0391
0.065375	24.0082
0.065874	23.9764
0.066374	23.9435
0.066873	23.9075
0.067372	23.8721
0.067871	23.8355
0.06837	23.799
0.068869	23.7609
0.069368	23.7215
0.069867	23.6796
0.070366	23.6391
0.070865	23.5974
0.071364	23.5576
0.071863	23.5158
0.072362	23.4736
0.072861	23.4288
0.07336	23.3846
0.073859	23.3399
0.074358	23.2941
0.074857	23.2482
0.075356	23.199
0.075855	23.1554
0.076355	23.1041
0.076854	23.0595
0.077353	23.0088
0.077852	22.9632
0.078351	22.9151
0.07885	22.867
0.079349	22.8176
0.079848	22.7722
0.080347	22.7234
0.080846	22.6728
0.081345	22.619
0.081844	22.5701
0.082343	22.5181
0.082842	22.4675
0.083341	22.4135
0.08384	22.3576
0.084339	22.2984
0.084838	22.2394
0.085337	22.1757
0.085836	22.1137
0.086336	22.0437
0.086835	21.9766
0.087334	21.9041
0.087833	21.8334
0.088332	21.7519
0.088831	21.6742
0.08933	21.5885
0.089829	21.497
0.090328	21.4097
0.090827	21.3157
0.091326	21.2256
0.091825	21.1306
0.092324	21.0368
0.092823	20.9446
0.093322	20.8482
0.093821	20.7507
0.09432	20.6548
0.094819	20.5612
0.095318	20.4706
0.095817	20.3753
0.096316	20.2801
0.096816	20.183
0.097315	20.0955
0.097814	20.0054
0.098313	19.9134
0.098812	19.8292
0.099311	19.7484
0.09981	19.6674
0.100309	19.5935
0.100808	19.5204
0.101307	19.4466
0.101806	19.3778
0.102305	19.3189
0.102804	19.2586
0.103303	19.2059
0.103802	19.1603
0.104301	19.1237
0.1048	19.0905
0.105299	19.0641
0.105798	19.0393
0.106297	19.0185
0.106797	18.9986
0.107296	18.984
0.107795	18.9752
0.108294	18.9719
0.108793	18.9727
0.109292	18.9783
0.109791	18.988
0.11029	19.0032
0.110789	19.0203
0.111288	19.0403
0.111787	19.0628
0.112286	19.0907
0.112785	19.122
0.113284	19.155
0.113783	19.1933
0.114282	19.2372
0.114781	19.285
0.11528	19.3308
0.115779	19.3819
0.116278	19.4309
0.116778	19.4827
0.117277	19.5319
0.117776	19.5835
0.118275	19.633
0.118774	19.6863
0.119273	19.7381
0.119772	19.7863
0.120271	19.8341
0.12077	19.8854
0.121269	19.9313
0.121768	19.9771
0.122267	20.0203
0.122766	20.0632
0.123265	20.1033
0.123764	20.1402
0.124263	20.1747
0.124762	20.2063
0.125261	20.2382
0.12576	20.2675
0.126259	20.2943
0.126758	20.3187
0.127258	20.3391
0.127757	20.3538
0.128256	20.3622
0.128755	20.3654
0.129254	20.3632
0.129753	20.3554
0.130252	20.3442
0.130751	20.3281
0.13125	20.3079
0.131749	20.2859
0.132248	20.259
0.132747	20.2276
0.133246	20.1915
0.133745	20.151
0.134244	20.108
0.134743	20.0665
0.135242	20.0228
0.135741	19.979
0.13624	19.939
0.136739	19.8955
0.137239	19.8518
0.137738	19.8061
0.138237	19.7625
0.138736	19.7173
0.139235	19.6688
0.139734	19.6168
0.140233	19.5675
0.140732	19.5195
0.141231	19.4661
0.14173	19.4142
0.142229	19.3615
0.142728	19.3077
0.143227	19.2553
0.143726	19.2022
0.144225	19.1459
0.144724	19.091
0.145223	19.0385
0.145722	18.9854
0.146221	18.9343
0.14672	18.882
0.147219	18.8322
0.147719	18.7813
0.148218	18.7322
0.148717	18.6843
0.149216	18.6346
0.149715	18.5851
0.150214	18.5335
0.150713	18.4807
0.151212	18.429
0.151711	18.3739
0.15221	18.3171
0.152709	18.2574
0.153208	18.1996
0.153707	18.1379
0.154206	18.0783
0.154705	18.0222
0.155204	17.9657
0.155703	17.9077
0.156202	17.8516
0.156701	17.7978
0.1572	17.7427
0.1577	17.6913
0.158199	17.6419
0.158698	17.5937
0.159197	17.5482
0.159696	17.4977
0.160195	17.4466
0.160694	17.3962
0.161193	17.3457
0.161692	17.2931
0.162191	17.242
0.16269	17.1919
0.163189	17.1417
0.163688	17.0931
0.164187	17.0485
0.164686	17.0043
0.165185	16.9586
0.165684	16.9167
0.166183	16.8743
0.166682	16.8347
0.167181	16.7945
0.167681	16.7546
0.16818	16.7169
0.168679	16.6779
0.169178	16.6393
0.169677	16.6026
0.170176	16.5661
0.170675	16.5289
0.171174	16.4925
0.171673	16.4543
0.172172	16.4151
0.172671	16.3785
0.17317	16.3452
0.173669	16.31
0.174168	16.2677
0.174667	16.2314
0.175166	16.1969
0.175665	16.1623
0.176164	16.1271
0.176663	16.0945
0.177162	16.0633
0.177661	16.0316
0.178161	16.0019
0.17866	15.9724
0.179159	15.9415
0.179658	15.9097
0.180157	15.8793
0.180656	15.8479
0.181155	15.8181
0.181654	15.7875
0.182153	15.7578
0.182652	15.7261
0.183151	15.6899
0.18365	15.6552
0.184149	15.6224
0.184648	15.5897
0.185147	15.5558
0.185646	15.5225
0.186145	15.4894
0.186644	15.4583
0.187143	15.4265
0.187642	15.3961
0.188142	15.366
0.188641	15.3354
0.18914	15.3062
0.189639	15.2791
0.190138	15.2508
0.190637	15.222
0.191136	15.1974
0.191635	15.1703
0.192134	15.1414
0.192633	15.1157
0.193132	15.0899
0.193631	15.0639
0.19413	15.0378
0.194629	15.0141
0.195128	14.9909
0.195627	14.9674
0.196126	14.9417
0.196625	14.9165
0.197124	14.894
0.197623	14.8701
0.198123	14.8455
0.198622	14.8226
0.199121	14.7983
0.19962	14.7765
0.200119	14.7548
0.200618	14.733
0.201117	14.7117
0.201616	14.6889
0.202115	14.6673
0.202614	14.6456
0.203113	14.6258
0.203612	14.6058
0.204111	14.5842
0.20461	14.5635
0.205109	14.5429
0.205608	14.5228
0.206107	14.5022
0.206606	14.4821
0.207105	14.4632
0.207604	14.4437
0.208103	14.4261
0.208603	14.4095
0.209102	14.392
0.209601	14.3739
0.2101	14.3574
0.210599	14.3432
0.211098	14.3265
0.211597	14.3112
0.212096	14.2955
0.212595	14.28
0.213094	14.2651
0.213593	14.2498
0.214092	14.2334
0.214591	14.2182
0.21509	14.202
0.215589	14.1881
0.216088	14.172
0.216587	14.1574
0.217086	14.1425
0.217585	14.1272
0.218084	14.1118
0.218584	14.0955
0.219083	14.0824
0.219582	14.0677
0.220081	14.0537
0.22058	14.0386
0.221079	14.0249
0.221578	14.0115
0.222077	13.9972
0.222576	13.9855
0.223075	13.9729
0.223574	13.9603
0.224073	13.949
0.224572	13.9384
0.225071	13.9256
0.22557	13.9147
0.226069	13.9036
0.226568	13.892
0.227067	13.8813
0.227566	13.8703
0.228065	13.8584
0.228565	13.8467
0.229064	13.8361
0.229563	13.8253
0.230062	13.8146
0.230561	13.8048
0.23106	13.7946
0.231559	13.7844
0.232058	13.7748
0.232557	13.7653
0.233056	13.754
0.233555	13.7443
0.234054	13.7344
0.234553	13.7246
0.235052	13.7152
0.235551	13.7028
0.23605	13.6918
0.236549	13.6805
0.237048	13.6701
0.237547	13.6609
0.238046	13.6514
0.238545	13.6425
0.239045	13.6324
0.239544	13.622
0.240043	13.6111
0.240542	13.6001
0.241041	13.5901
0.24154	13.5808
0.242039	13.5709
0.242538	13.562
0.243037	13.5515
0.243536	13.5423
0.244035	13.5324
0.244534	13.5226
0.245033	13.5129
0.245532	13.5044
0.246031	13.4946
0.24653	13.4843
0.247029	13.4745
0.247528	13.4642
0.248027	13.4539
0.248526	13.4436
0.249026	13.4332
0.249525	13.4211
0.250024	13.4107
0.250523	13.3991
0.251022	13.3887
0.251521	13.3781
0.25202	13.3664
0.252519	13.355
0.253018	13.3441
0.253517	13.3338
0.254016	13.3234
0.254515	13.313
0.255014	13.3021
0.255513	13.2919
0.256012	13.2821
0.256511	13.2714
0.25701	13.2615
0.257509	13.2521
0.258008	13.2418
0.258507	13.2313
0.259007	13.2206
0.259506	13.21
0.260005	13.2004
0.260504	13.1911
0.261003	13.181
0.261502	13.1714
0.262001	13.1619
0.2625	13.1518
0.262999	13.1415
0.263498	13.1311
0.263997	13.1224
0.264496	13.1144
0.264995	13.1065
0.265494	13.0984
0.265993	13.0904
0.266492	13.0829
0.266991	13.0755
0.26749	13.0691
0.267989	13.0634
0.268488	13.0567
0.268987	13.05
0.269487	13.0429
0.269986	13.0363
0.270485	13.0298
0.270984	13.0233
0.271483	13.0159
0.271982	13.0085
0.272481	13.0007
0.27298	12.9934
0.273479	12.9855
0.273978	12.9773
0.274477	12.9693
0.274976	12.9612
0.275475	12.9519
0.275974	12.9424
0.276473	12.9332
0.276972	12.9262
0.277471	12.9182
0.27797	12.9092
0.278469	12.9004
0.278968	12.8922
0.279468	12.8834
0.279967	12.8737
0.280466	12.8652
0.280965	12.8562
0.281464	12.8478
0.281963	12.8395
0.282462	12.8313
0.282961	12.823
0.28346	12.8137
0.283959	12.8064
0.284458	12.7981
0.284957	12.7894
0.285456	12.7812
0.285955	12.7735
0.286454	12.7645
0.286953	12.7564
0.287452	12.748
0.287951	12.7405
0.28845	12.733
0.288949	12.7247
0.289448	12.7165
0.289948	12.7077
0.290447	12.6987
0.290946	12.6897
0.291445	12.6806
0.291944	12.6712
0.292443	12.6619
0.292942	12.6524
0.293441	12.6425
0.29394	12.6325
0.294439	12.6223
0.294938	12.6125
0.295437	12.6019
0.295936	12.5913
0.296435	12.5809
0.296934	12.5719
0.297433	12.5622
0.297932	12.5527
0.298431	12.5439
0.29893	12.5352
0.299429	12.5276
0.299929	12.5195
0.300428	12.5114
0.300927	12.5043
0.301426	12.4972
0.301925	12.4906
0.302424	12.4831
0.302923	12.4746
0.303422	12.4677
0.303921	12.4616
0.30442	12.4545
0.304919	12.448
0.305418	12.4427
0.305917	12.4366
0.306416	12.43
0.306915	12.4229
0.307414	12.4154
0.307913	12.4079
0.308412	12.4007
0.308911	12.3941
0.30941	12.387
0.30991	12.3795
0.310409	12.3719
0.310908	12.3645
0.311407	12.3578
0.311906	12.351
0.312405	12.343
0.312904	12.3363
0.313403	12.3288
0.313902	12.3208
0.314401	12.3133
0.3149	12.3061
0.315399	12.299
0.315898	12.2922
0.316397	12.2855
0.316896	12.2789
0.317395	12.2723
0.317894	12.266
0.318393	12.2591
0.318892	12.2524
0.319391	12.2463
0.31989	12.2397
0.32039	12.2334
0.320889	12.2271
0.321388	12.2205
0.321887	12.2144
0.322386	12.2078
0.322885	12.2013
0.323384	12.1953
0.323883	12.1887
0.324382	12.182
0.324881	12.1764
0.32538	12.1701
0.325879	12.1636
0.326378	12.1575
0.326877	12.1514
0.327376	12.1444
0.327875	12.1368
0.328374	12.1304
0.328873	12.125
0.329372	12.119
0.329871	12.1122
0.330371	12.1066
0.33087	12.1
0.331369	12.0937
0.331868	12.0877
0.332367	12.0824
0.332866	12.0765
0.333365	12.0719
0.333864	12.0663
0.334363	12.0607
0.334862	12.0554
0.335361	12.0498
0.33586	12.045
0.336359	12.0412
0.336858	12.0366
0.337357	12.031
0.337856	12.0275
0.338355	12.0229
0.338854	12.0185
0.339353	12.014
0.339852	12.0102
0.340352	12.0056
0.340851	12.0019
0.34135	11.9961
0.341849	11.992
0.342348	11.9869
0.342847	11.983
0.343346	11.9778
0.343845	11.9724
0.344344	11.9674
0.344843	11.9628
0.345342	11.9579
0.345841	11.9531
0.34634	11.9483
0.346839	11.9432
0.347338	11.9377
0.347837	11.9323
0.348336	11.9274
0.348835	11.9229
0.349334	11.919
0.349833	11.914
0.350332	11.9088
0.350832	11.9042
0.351331	11.8988
0.35183	11.8943
0.352329	11.8907
0.352828	11.8876
0.353327	11.8834
0.353826	11.8802
0.354325	11.8759
0.354824	11.8727
0.355323	11.8685
0.355822	11.8641
0.356321	11.8598
0.35682	11.8555
0.357319	11.8525
0.357818	11.85
0.358317	11.8466
0.358816	11.8443
0.359315	11.8428
0.359814	11.84
0.360313	11.8377
0.360813	11.8375
0.361312	11.8346
0.361811	11.8325
0.36231	11.8311
0.362809	11.8305
0.363308	11.8276
0.363807	11.827
0.364306	11.8269
0.364805	11.8253
0.365304	11.8244
0.365803	11.8227
0.366302	11.8222
0.366801	11.8208
0.3673	11.8189
0.367799	11.817
0.368298	11.8151
0.368797	11.8139
0.369296	11.8111
0.369795	11.8088
0.370294	11.807
0.370794	11.8047
0.371293	11.8021
0.371792	11.7993
0.372291	11.7979
0.37279	11.7951
0.373289	11.7931
0.373788	11.7912
0.374287	11.7895
0.374786	11.7867
0.375285	11.784
0.375784	11.7811
0.376283	11.7796
0.376782	11.7756
0.377281	11.7734
0.37778	11.7705
0.378279	11.7677
0.378778	11.7637
0.379277	11.7611
0.379776	11.7575
0.380275	11.7538
0.380774	11.7513
0.381274	11.748
0.381773	11.7451
0.382272	11.7411
0.382771	11.7368
0.38327	11.7328
0.383769	11.7287
0.384268	11.7225
0.384767	11.7173
0.385266	11.7122
0.385765	11.7064
0.386264	11.701
0.386763	11.6954
0.387262	11.6893
0.387761	11.6829
0.38826	11.6773
0.388759	11.6703
0.389258	11.6645
0.389757	11.6587
0.390256	11.6521
0.390755	11.6455
0.391255	11.6404
0.391754	11.6345
0.392253	11.6301
0.392752	11.6248
0.393251	11.6201
0.39375	11.6156
0.394249	11.612
0.394748	11.6069
0.395247	11.6017
0.395746	11.5986
0.396245	11.5949
0.396744	11.5916
0.397243	11.5885
0.397742	11.5853
0.398241	11.5812
0.39874	11.5774
0.399239	11.5732
0.399738	11.5698
0.400237	11.5667
0.400736	11.5638
0.401236	11.5597
0.401735	11.5575
0.402234	11.5526
0.402733	11.5495
0.403232	11.5472
0.403731	11.5453
0.40423	11.5412
0.404729	11.5386
0.405228	11.5351
0.405727	11.531
0.406226	11.5279
0.406725	11.5249
0.407224	11.5215
0.407723	11.519
0.408222	11.5156
0.408721	11.5121
0.40922	11.51
0.409719	11.5075
0.410218	11.505
0.410717	11.5022
0.411216	11.5001
0.411716	11.4972
0.412215	11.4942
0.412714	11.4915
0.413213	11.4889
0.413712	11.4865
0.414211	11.4832
0.41471	11.4806
0.415209	11.4786
0.415708	11.4766
0.416207	11.4736
0.416706	11.4706
0.417205	11.4672
0.417704	11.4586
0.418203	11.4505
0.418702	11.4442
0.419201	11.4396
0.4197	11.434
0.420199	11.4316
0.420698	11.43
0.421197	11.4283
0.421697	11.4267
0.422196	11.425
0.422695	11.4237
0.423194	11.4209
0.423693	11.4179
0.424192	11.4156
0.424691	11.4138
0.42519	11.4118
0.425689	11.4104
0.426188	11.4091
0.426687	11.408
0.427186	11.4063
0.427685	11.4041
0.428184	11.4022
0.428683	11.4012
0.429182	11.4005
0.429681	11.3994
0.43018	11.3984
0.430679	11.3965
0.431178	11.3945
0.431678	11.3929
0.432177	11.3918
0.432676	11.3912
0.433175	11.3904
0.433674	11.3899
0.434173	11.389
0.434672	11.3878
0.435171	11.3868
0.43567	11.3856
0.436169	11.3845
0.436668	11.384
0.437167	11.3836
0.437666	11.3826
0.438165	11.3817
0.438664	11.381
0.439163	11.3798
0.439662	11.3787
0.440161	11.3777
0.44066	11.3767
0.441159	11.3749
0.441658	11.3722
0.442158	11.3703
0.442657	11.3682
0.443156	11.3657
0.443655	11.3644
0.444154	11.3631
0.444653	11.3617
0.445152	11.3606
0.445651	11.3592
0.44615	11.358
0.446649	11.3574
0.447148	11.3562
0.447647	11.355
0.448146	11.3542
0.448645	11.3542
0.449144	11.3547
0.449643	11.3559
0.450142	11.3578
0.450641	11.3606
0.45114	11.3636
0.451639	11.3656
0.452139	11.3685
0.452638	11.3714
0.453137	11.3737
0.453636	11.3745
0.454135	11.3746
0.454634	11.3736
0.455133	11.3721
0.455632	11.3713
0.456131	11.3696
0.45663	11.3676
0.457129	11.3656
0.457628	11.3636
0.458127	11.3616
0.458626	11.3592
0.459125	11.3567
0.459624	11.3541
0.460123	11.3515
0.460622	11.3493
0.461121	11.347
0.46162	11.3442
0.46212	11.341
0.462619	11.3382
0.463118	11.3349
0.463617	11.3323
0.464116	11.33
0.464615	11.3274
0.465114	11.3247
0.465613	11.3221
0.466112	11.3205
0.466611	11.3183
0.46711	11.3159
0.467609	11.3144
0.468108	11.3125
0.468607	11.3101
0.469106	11.3075
0.469605	11.3056
0.470104	11.3033
0.470603	11.3001
0.471102	11.297
0.471601	11.2936
0.4721	11.2903
0.4726	11.2872
0.473099	11.2842
0.473598	11.2801
0.474097	11.2751
0.474596	11.2694
0.475095	11.263
0.475594	11.2564
0.476093	11.2488
0.476592	11.2414
0.477091	11.2337
0.47759	11.2259
0.478089	11.2188
0.478588	11.2129
0.479087	11.2079
0.479586	11.203
0.480085	11.1988
0.480584	11.1945
0.481083	11.191
0.481582	11.1885
0.482081	11.1856
0.482581	11.1821
0.48308	11.1789
0.483579	11.1762
0.484078	11.1739
0.484577	11.1712
0.485076	11.1682
0.485575	11.1655
0.486074	11.1622
0.486573	11.1592
0.487072	11.157
0.487571	11.1551
0.48807	11.1532
0.488569	11.1511
0.489068	11.149
0.489567	11.1468
0.490066	11.1443
0.490565	11.1415
0.491064	11.138
0.491563	11.1351
0.492062	11.1323
0.492562	11.1294
0.493061	11.1263
0.49356	11.124
0.494059	11.1218
0.494558	11.1195
0.495057	11.1166
0.495556	11.1139
0.496055	11.1116
0.496554	11.1092
0.497053	11.1067
0.497552	11.1044
0.498051	11.102
0.49855	11.0999
0.499049	11.0975
0.499548	11.095
0.500047	11.0928
0.500546	11.0892
0.501045	11.086
0.501544	11.0841
0.502043	11.0828
0.502542	11.0807
0.503042	11.078
0.503541	11.0758
0.50404	11.0738
0.504539	11.0722
0.505038	11.0712
0.505537	11.0703
0.506036	11.069
0.506535	11.0669
0.507034	11.0654
0.507533	11.0642
0.508032	11.0627
0.508531	11.0611
0.50903	11.0596
0.509529	11.0586
0.510028	11.0568
0.510527	11.0554
0.511026	11.055
0.511525	11.0542
0.512024	11.0525
0.512523	11.0512
0.513023	11.0503
0.513522	11.0486
0.514021	11.047
0.51452	11.046
0.515019	11.0453
0.515518	11.0451
0.516017	11.0439
0.516516	11.0425
0.517015	11.0412
0.517514	11.0405
0.518013	11.0384
0.518512	11.0357
0.519011	11.0345
0.51951	11.0329
0.520009	11.0322
0.520508	11.0307
0.521007	11.0293
0.521506	11.0274
0.522005	11.0261
0.522504	11.0249
0.523004	11.0237
0.523503	11.0216
0.524002	11.0207
0.524501	11.0205
0.525	11.0192
0.525499	11.0186
0.525998	11.0177
0.526497	11.0147
0.526996	11.0129
0.527495	11.0121
0.527994	11.0111
0.528493	11.0103
0.528992	11.0092
0.529491	11.009
0.52999	11.0071
0.530489	11.0062
0.530988	11.0036
0.531487	11.0025
0.531986	11.0002
0.532485	10.9985
0.532984	10.9952
0.533484	10.9916
0.533983	10.9828
0.534482	10.975
0.534981	10.9716
0.53548	10.9694
0.535979	10.9673
0.536478	10.966
0.536977	10.9634
0.537476	10.9607
0.537975	10.9583
0.538474	10.9566
0.538973	10.9549
0.539472	10.953
0.539971	10.9515
0.54047	10.951
0.540969	10.95
0.541468	10.9479
0.541967	10.9453
0.542466	10.9446
0.542965	10.9437
0.543465	10.9425
0.543964	10.9416
0.544463	10.9404
0.544962	10.9387
0.545461	10.9378
0.54596	10.9372
0.546459	10.9354
0.546958	10.9331
0.547457	10.9317
0.547956	10.931
0.548455	10.9299
0.548954	10.9288
0.549453	10.9267
0.549952	10.9256
0.550451	10.924
0.55095	10.9215
0.551449	10.9192
0.551948	10.9169
0.552447	10.9154
0.552946	10.9141
0.553446	10.913
0.553945	10.9117
0.554444	10.911
0.554943	10.9109
0.555442	10.9111
0.555941	10.9106
0.55644	10.9108
0.556939	10.9117
0.557438	10.9126
0.557937	10.9131
0.558436	10.9133
0.558935	10.9144
0.559434	10.9157
0.559933	10.9162
0.560432	10.9165
0.560931	10.9164
0.56143	10.9167
0.561929	10.9175
0.562428	10.9184
0.562927	10.9186
0.563426	10.9181
0.563926	10.9177
0.564425	10.9177
0.564924	10.9175
0.565423	10.9167
0.565922	10.9167
0.566421	10.9177
0.56692	10.9187
0.567419	10.919
0.567918	10.9185
0.568417	10.9185
0.568916	10.9184
0.569415	10.9185
0.569914	10.9188
0.570413	10.918
0.570912	10.9181
0.571411	10.9184
0.57191	10.9185
0.572409	10.9189
0.572908	10.9195
0.573407	10.9204
0.573907	10.922
0.574406	10.922
0.574905	10.9217
0.575404	10.9218
0.575903	10.9222
0.576402	10.9227
0.576901	10.9232
0.5774	10.9238
0.577899	10.9242
0.578398	10.9247
0.578897	10.9256
0.579396	10.9254
0.579895	10.9239
0.580394	10.9241
0.580893	10.924
0.581392	10.9228
0.581891	10.9215
0.58239	10.9214
0.582889	10.9207
0.583388	10.9207
0.583888	10.9205
0.584387	10.9195
0.584886	10.9185
0.585385	10.9179
0.585884	10.9174
0.586383	10.9175
0.586882	10.917
0.587381	10.9153
0.58788	10.9133
0.588379	10.912
0.588878	10.9121
0.589377	10.9127
0.589876	10.9118
0.590375	10.9108
0.590874	10.9101
0.591373	10.9094
0.591872	10.9076
0.592371	10.9062
0.59287	10.9045
0.593369	10.9028
0.593868	10.9023
0.594368	10.9005
0.594867	10.8997
0.595366	10.8981
0.595865	10.8968
0.596364	10.8968
0.596863	10.8963
0.597362	10.895
0.597861	10.8938
0.59836	10.8926
0.598859	10.8915
0.599358	10.8905
0.599857	10.8893
0.600356	10.8883
0.600855	10.8875
0.601354	10.8865
0.601853	10.8854
0.602352	10.8844
0.602851	10.8832
0.60335	10.8815
0.603849	10.88
0.604349	10.8785
0.604848	10.8772
0.605347	10.8765
0.605846	10.8765
0.606345	10.8749
0.606844	10.8734
0.607343	10.8733
0.607842	10.8726
0.608341	10.8713
0.60884	10.8699
0.609339	10.8683
0.609838	10.8672
0.610337	10.8659
0.610836	10.864
0.611335	10.8612
0.611834	10.8589
0.612333	10.8561
0.612832	10.8544
0.613331	10.8539
0.61383	10.8527
0.61433	10.8506
0.614829	10.8483
0.615328	10.8472
0.615827	10.8461
0.616326	10.8444
0.616825	10.8434
0.617324	10.8421
0.617823	10.8409
0.618322	10.8387
0.618821	10.8369
0.61932	10.8355
0.619819	10.8351
0.620318	10.8338
0.620817	10.8319
0.621316	10.8293
0.621815	10.8268
0.622314	10.8244
0.622813	10.823
0.623312	10.8213
0.623811	10.8192
0.62431	10.8172
0.62481	10.8147
0.625309	10.8127
0.625808	10.812
0.626307	10.8098
0.626806	10.8092
0.627305	10.809
0.627804	10.807
0.628303	10.8057
0.628802	10.8044
0.629301	10.8037
0.6298	10.8025
0.630299	10.8015
0.630798	10.7997
0.631297	10.7981
0.631796	10.7972
0.632295	10.7956
0.632794	10.7939
0.633293	10.7914
0.633792	10.7902
0.634291	10.7893
0.634791	10.7868
0.63529	10.784
0.635789	10.7822
0.636288	10.7821
0.636787	10.7815
0.637286	10.7797
0.637785	10.7792
0.638284	10.7787
0.638783	10.7778
0.639282	10.7766
0.639781	10.7756
0.64028	10.7736
0.640779	10.7715
0.641278	10.7706
0.641777	10.7691
0.642276	10.7672
0.642775	10.766
0.643274	10.765
0.643773	10.7637
0.644272	10.762
0.644772	10.7603
0.645271	10.7584
0.64577	10.757
0.646269	10.7563
0.646768	10.7541
0.647267	10.7526
0.647766	10.7504
0.648265	10.749
0.648764	10.7474
0.649263	10.7454
0.649762	10.7434
0.650261	10.7421
0.65076	10.7402
0.651259	10.7388
0.651758	10.736
0.652257	10.7326
0.652756	10.7302
0.653255	10.7275
0.653754	10.7253
0.654253	10.723
0.654752	10.7201
0.655252	10.7174
0.655751	10.7155
0.65625	10.714
0.656749	10.7117
0.657248	10.7092
0.657747	10.7073
0.658246	10.7062
0.658745	10.7046
0.659244	10.7019
0.659743	10.7009
0.660242	10.7004
0.660741	10.6989
0.66124	10.6975
0.661739	10.6959
0.662238	10.6953
0.662737	10.6931
0.663236	10.6907
0.663735	10.6887
0.664234	10.688
0.664733	10.6863
0.665232	10.685
0.665732	10.6839
0.666231	10.6816
0.66673	10.6796
0.667229	10.6779
0.667728	10.6757
0.668227	10.674
0.668726	10.6724
0.669225	10.6708
0.669724	10.6692
0.670223	10.6674
0.670722	10.6659
0.671221	10.6646
0.67172	10.6634
0.672219	10.6613
0.672718	10.66
0.673217	10.6583
0.673716	10.6573
0.674215	10.6561
0.674714	10.655
0.675214	10.6533
0.675713	10.6511
0.676212	10.6489
0.676711	10.6471
0.67721	10.6462
0.677709	10.6444
0.678208	10.6434
0.678707	10.6414
0.679206	10.6397
0.679705	10.6382
0.680204	10.6372
0.680703	10.6354
0.681202	10.6334
0.681701	10.6326
0.6822	10.6312
0.682699	10.63
0.683198	10.6278
0.683697	10.6258
0.684196	10.6245
0.684695	10.6215
0.685194	10.6195
0.685694	10.6175
0.686193	10.6154
0.686692	10.613
0.687191	10.6109
0.68769	10.6088
0.688189	10.6064
0.688688	10.6044
0.689187	10.6018
0.689686	10.5994
0.690185	10.5977
0.690684	10.5956
0.691183	10.5954
0.691682	10.5946
0.692181	10.5938
0.69268	10.5928
0.693179	10.5908
0.693678	10.5886
0.694177	10.5874
0.694676	10.5851
0.695175	10.584
0.695674	10.584
0.696174	10.5834
0.696673	10.5831
0.697172	10.5824
0.697671	10.5812
0.69817	10.5803
0.698669	10.5788
0.699168	10.5764
0.699667	10.5741
0.700166	10.5727
0.700665	10.5714
0.701164	10.571
0.701663	10.5701
0.702162	10.5684
0.702661	10.5681
0.70316	10.5678
0.703659	10.5673
0.704158	10.565
0.704657	10.5639
0.705156	10.5626
0.705656	10.5614
0.706155	10.5609
0.706654	10.5595
0.707153	10.5595
0.707652	10.5583
0.708151	10.5584
0.70865	10.557
0.709149	10.5566
0.709648	10.556
0.710147	10.5545
0.710646	10.5545
0.711145	10.5542
0.711644	10.5546
0.712143	10.5543
0.712642	10.5538
0.713141	10.5533
0.71364	10.5529
0.714139	10.5524
0.714638	10.5517
0.715137	10.5516
0.715636	10.5515
0.716136	10.5493
0.716635	10.5485
0.717134	10.5478
0.717633	10.5464
0.718132	10.546
0.718631	10.5464
0.71913	10.5459
0.719629	10.5457
0.720128	10.5453
0.720627	10.5441
0.721126	10.5427
0.721625	10.5421
0.722124	10.5408
0.722623	10.5397
0.723122	10.5383
0.723621	10.5379
0.72412	10.5383
0.724619	10.5383
0.725118	10.5368
0.725617	10.5358
0.726116	10.5344
0.726616	10.5328
0.727115	10.532
0.727614	10.5306
0.728113	10.529
0.728612	10.5279
0.729111	10.5279
0.72961	10.527
0.730109	10.5259
0.730608	10.5251
0.731107	10.5236
0.731606	10.5228
0.732105	10.5205
0.732604	10.518
0.733103	10.5162
0.733602	10.515
0.734101	10.5129
0.7346	10.5125
0.735099	10.5119
0.735598	10.5105
0.736098	10.5082
0.736597	10.5063
0.737096	10.5045
0.737595	10.5029
0.738094	10.5009
0.738593	10.4996
0.739092	10.4975
0.739591	10.4955
0.74009	10.4928
0.740589	10.4905
0.741088	10.4886
0.741587	10.4864
0.742086	10.4839
0.742585	10.4818
0.743084	10.4794
0.743583	10.4761
0.744082	10.4727
0.744581	10.4707
0.74508	10.4683
0.745579	10.4662
0.746078	10.4633
0.746578	10.4603
0.747077	10.4591
0.747576	10.4575
0.748075	10.4545
0.748574	10.4519
0.749073	10.4498
0.749572	10.4473
0.750071	10.4454
0.75057	10.4431
0.751069	10.4414
0.751568	10.4398
0.752067	10.4376
0.752566	10.436
0.753065	10.434
0.753564	10.4323
0.754063	10.4307
0.754562	10.4285
0.755061	10.4257
0.75556	10.4232
0.756059	10.4212
0.756558	10.4196
0.757058	10.4182
0.757557	10.4171
0.758056	10.4163
0.758555	10.4152
0.759054	10.4139
0.759553	10.4121
0.760052	10.4104
0.760551	10.4092
0.76105	10.408
0.761549	10.4066
0.762048	10.4045
0.762547	10.4023
0.763046	10.4002
0.763545	10.3986
0.764044	10.3972
0.764543	10.3956
0.765042	10.3945
0.765541	10.3927
0.76604	10.3913
0.766539	10.3904
0.767039	10.3899
0.767538	10.3889
0.768037	10.3879
0.768536	10.3875
0.769035	10.3874
0.769534	10.3863
0.770033	10.3846
0.770532	10.3833
0.771031	10.3822
0.77153	10.3803
0.772029	10.378
0.772528	10.3774
0.773027	10.3772
0.773526	10.3758
0.774025	10.3742
0.774524	10.3733
0.775023	10.3734
0.775522	10.3736
0.776021	10.3733
0.77652	10.3729
0.77702	10.372
0.777519	10.3711
0.778018	10.3708
0.778517	10.3701
0.779016	10.3685
0.779515	10.3683
0.780014	10.3682
0.780513	10.3675
0.781012	10.3668
0.781511	10.3661
0.78201	10.366
0.782509	10.3654
0.783008	10.3642
0.783507	10.3631
0.784006	10.3613
0.784505	10.3595
0.785004	10.3579
0.785503	10.3567
0.786002	10.3551
0.786501	10.354
0.787	10.353
0.7875	10.3526
0.787999	10.3523
0.788498	10.3508
0.788997	10.3503
0.789496	10.3498
0.789995	10.3493
0.790494	10.3488
0.790993	10.3476
0.791492	10.346
0.791991	10.3447
0.79249	10.3435
0.792989	10.3423
0.793488	10.3413
0.793987	10.3396
0.794486	10.3385
0.794985	10.3369
0.795484	10.3363
0.795983	10.3359
0.796482	10.3362
0.796981	10.3359
0.797481	10.335
0.79798	10.3339
0.798479	10.3332
0.798978	10.3323
0.799477	10.3321
0.799976	10.3305
0.800475	10.3295
0.800974	10.3276
0.801473	10.3269
0.801972	10.3262
0.802471	10.3255
0.80297	10.325
0.803469	10.3246
0.803968	10.3248
0.804467	10.324
0.804966	10.3229
0.805465	10.3219
0.805964	10.3214
0.806463	10.3203
0.806962	10.3188
0.807462	10.3177
0.807961	10.3163
0.80846	10.3152
0.808959	10.3143
0.809458	10.3146
0.809957	10.3131
0.810456	10.3123
0.810955	10.3121
0.811454	10.3113
0.811953	10.3105
0.812452	10.3096
0.812951	10.3088
0.81345	10.3087
0.813949	10.3078
0.814448	10.3065
0.814947	10.3044
0.815446	10.3038
0.815945	10.3031
0.816444	10.3031
0.816943	10.303
0.817442	10.3028
0.817942	10.3022
0.818441	10.302
0.81894	10.3011
0.819439	10.2998
0.819938	10.3001
0.820437	10.2982
0.820936	10.2971
0.821435	10.2959
0.821934	10.2946
0.822433	10.2936
0.822932	10.2934
0.823431	10.2928
0.82393	10.2925
0.824429	10.2901
0.824928	10.2894
0.825427	10.2867
0.825926	10.2855
0.826425	10.2839
0.826924	10.2834
0.827423	10.281
0.827923	10.2784
0.828422	10.2767
0.828921	10.2752
0.82942	10.2737
0.829919	10.2725
0.830418	10.2712
0.830917	10.269
0.831416	10.2677
0.831915	10.2672
0.832414	10.2677
0.832913	10.2682
0.833412	10.2689
0.833911	10.2689
0.83441	10.2685
0.834909	10.2684
0.835408	10.2679
0.835907	10.2668
0.836406	10.2666
0.836905	10.2675
0.837404	10.2672
0.837903	10.2672
0.838403	10.2673
0.838902	10.267
0.839401	10.2675
0.8399	10.2678
0.840399	10.2667
0.840898	10.2663
0.841397	10.2656
0.841896	10.2639
0.842395	10.2629
0.842894	10.2628
0.843393	10.263
0.843892	10.2635
0.844391	10.2633
0.84489	10.2638
0.845389	10.2651
0.845888	10.2655
0.846387	10.2657
0.846886	10.2662
0.847385	10.2658
0.847884	10.2652
0.848384	10.2653
0.848883	10.2661
0.849382	10.2663
0.849881	10.2665
0.85038	10.2677
0.850879	10.2684
0.851378	10.2684
0.851877	10.2688
0.852376	10.2699
0.852875	10.2716
0.853374	10.2723
0.853873	10.2718
0.854372	10.2725
0.854871	10.2739
0.85537	10.2749
0.855869	10.2753
0.856368	10.275
0.856867	10.2736
0.857366	10.2725
0.857865	10.2708
0.858365	10.2702
0.858864	10.2698
0.859363	10.2693
0.859862	10.2688
0.860361	10.268
0.86086	10.2678
0.861359	10.2674
0.861858	10.2668
0.862357	10.2668
0.862856	10.2667
0.863355	10.2665
0.863854	10.2667
0.864353	10.2655
0.864852	10.2651
0.865351	10.2654
0.86585	10.2661
0.866349	10.2668
0.866848	10.2674
0.867347	10.2683
0.867846	10.2682
0.868345	10.2671
0.868845	10.2658
0.869344	10.2648
0.869843	10.2633
0.870342	10.2616
0.870841	10.2601
0.87134	10.2595
0.871839	10.2594
0.872338	10.2584
0.872837	10.2572
0.873336	10.2563
0.873835	10.2551
0.874334	10.2538
0.874833	10.2528
0.875332	10.2529
0.875831	10.2529
0.87633	10.2516
0.876829	10.2516
0.877328	10.2503
0.877827	10.2508
0.878326	10.2496
0.878826	10.2479
0.879325	10.2476
0.879824	10.2482
0.880323	10.2473
0.880822	10.2452
0.881321	10.2439
0.88182	10.244
0.882319	10.2449
0.882818	10.2454
0.883317	10.2458
0.883816	10.2466
0.884315	10.2466
0.884814	10.2459
0.885313	10.2452
0.885812	10.2446
0.886311	10.2448
0.88681	10.2446
0.887309	10.244
0.887808	10.2435
0.888307	10.2432
0.888807	10.2425
0.889306	10.2418
0.889805	10.2415
0.890304	10.242
0.890803	10.2418
0.891302	10.2411
0.891801	10.2404
0.8923	10.238
0.892799	10.2376
0.893298	10.2373
0.893797	10.2363
0.894296	10.2371
0.894795	10.2375
0.895294	10.2377
0.895793	10.2383
0.896292	10.2385
0.896791	10.2383
0.89729	10.2377
0.897789	10.2366
0.898288	10.2369
0.898787	10.2376
0.899287	10.238
0.899786	10.2379
0.900285	10.2373
0.900784	10.2369
0.901283	10.2361
0.901782	10.2355
0.902281	10.2344
0.90278	10.2341
0.903279	10.2336
0.903778	10.2338
0.904277	10.2329
0.904776	10.2314
0.905275	10.2309
0.905774	10.2303
0.906273	10.2304
0.906772	10.2301
0.907271	10.2292
0.90777	10.2281
0.908269	10.2272
0.908768	10.2257
0.909268	10.2245
0.909767	10.2237
0.910266	10.2231
0.910765	10.2234
0.911264	10.2217
0.911763	10.2213
0.912262	10.2209
0.912761	10.2203
0.91326	10.2193
0.913759	10.2186
0.914258	10.2181
0.914757	10.2172
0.915256	10.2161
0.915755	10.2149
0.916254	10.2145
0.916753	10.2134
0.917252	10.2122
0.917751	10.2117
0.91825	10.2109
0.918749	10.2107
0.919249	10.211
0.919748	10.2102
0.920247	10.2095
0.920746	10.2085
0.921245	10.2073
0.921744	10.206
0.922243	10.2055
0.922742	10.2053
0.923241	10.2041
0.92374	10.2031
0.924239	10.2027
0.924738	10.2018
0.925237	10.2013
0.925736	10.2006
0.926235	10.1999
0.926734	10.1997
0.927233	10.1992
0.927732	10.1982
0.928231	10.1969
0.92873	10.1948
0.929229	10.194
0.929729	10.1937
0.930228	10.1928
0.930727	10.1918
0.931226	10.1907
0.931725	10.19
0.932224	10.1892
0.932723	10.1885
0.933222	10.1878
0.933721	10.1872
0.93422	10.1872
0.934719	10.1877
0.935218	10.1878
0.935717	10.1871
0.936216	10.1886
0.936715	10.1883
0.937214	10.1881
0.937713	10.1886
0.938212	10.1884
0.938711	10.1883
0.93921	10.1877
0.93971	10.1873
0.940209	10.1865
0.940708	10.1862
0.941207	10.1854
0.941706	10.1848
0.942205	10.1854
0.942704	10.1847
0.943203	10.1837
0.943702	10.1829
0.944201	10.1817
0.9447	10.1816
0.945199	10.1825
0.945698	10.1831
0.946197	10.183
0.946696	10.183
0.947195	10.1827
0.947694	10.1821
0.948193	10.1819
0.948692	10.1809
0.949191	10.18
0.949691	10.1793
0.95019	10.1796
0.950689	10.1793
0.951188	10.178
0.951687	10.1766
0.952186	10.1762
0.952685	10.1763
0.953184	10.1763
0.953683	10.176
0.954182	10.1764
0.954681	10.1766
0.95518	10.1757
0.955679	10.1753
0.956178	10.1749
0.956677	10.1747
0.957176	10.1741
0.957675	10.1725
0.958174	10.1718
0.958673	10.1699
0.959172	10.1682
0.959671	10.1662
0.960171	10.1643
0.96067	10.1623
0.961169	10.16
0.961668	10.1585
0.962167	10.1564
0.962666	10.1539
0.963165	10.1529
0.963664	10.1523
0.964163	10.1514
0.964662	10.1497
0.965161	10.1485
0.96566	10.1475
0.966159	10.1467
0.966658	10.1453
0.967157	10.1444
0.967656	10.1435
0.968155	10.1426
0.968654	10.1413
0.969153	10.1395
0.969652	10.137
0.970152	10.1346
0.970651	10.1334
0.97115	10.1322
0.971649	10.1305
0.972148	10.1296
0.972647	10.1282
0.973146	10.1277
0.973645	10.1279
0.974144	10.1265
0.974643	10.127
0.975142	10.126
0.975641	10.1261
0.97614	10.1267
0.976639	10.1265
0.977138	10.1257
0.977637	10.1243
0.978136	10.1236
0.978635	10.1232
0.979134	10.1222
0.979633	10.1212
0.980133	10.1212
0.980632	10.1213
0.981131	10.1211
0.98163	10.1199
0.982129	10.1191
0.982628	10.1198
0.983127	10.1193
0.983626	10.1197
0.984125	10.1193
0.984624	10.1202
0.985123	10.1205
0.985622	10.1212
0.986121	10.1214
0.98662	10.1212
0.987119	10.1215
0.987618	10.122
0.988117	10.1212
0.988616	10.1203
0.989115	10.1197
0.989614	10.1197
0.990113	10.1201
0.990613	10.12
0.991112	10.12
0.991611	10.1201
0.99211	10.1196
0.992609	10.1211
0.993108	10.1217
0.993607	10.1219
0.994106	10.1227
0.994605	10.1243
0.995104	10.1242
0.995603	10.1235
0.996102	10.1241
0.996601	10.1242
0.9971	10.123
[truncated: 29,673 more rows]

## Sheet: V496E_surfer_traces
time (s)	current (nA)
0	-0.000494738	-8.85982e-05	-4.4292e-05	-0.000129212	-0.000199364	8.49344e-05	6.64735e-05
0.001	-0.00314612	-0.000549964	-0.000267553	-0.000819918	-0.00128184	0.000548764	0.000442169
0.002	-0.00992245	-0.00171061	-0.000797017	-0.00256852	-0.00409842	0.00176303	0.00144958
0.003	-0.0215788	-0.00372277	-0.00162836	-0.00555568	-0.00903542	0.00384781	0.00324411
0.004	-0.0375851	-0.00654294	-0.00266608	-0.00965978	-0.0159203	0.00659794	0.00577181
0.005	-0.0567277	-0.0099958	-0.00380748	-0.0146331	-0.0242833	0.00976188	0.0088724
0.006	-0.0773947	-0.0138744	-0.00489842	-0.020178	-0.0335367	0.0131837	0.0123447
0.007	-0.0978774	-0.0179104	-0.00571654	-0.0259081	-0.0430666	0.0166775	0.015988
0.008	-0.11678	-0.021761	-0.00615394	-0.0314195	-0.0523175	0.0200167	0.0195805
0.009	-0.133204	-0.0251909	-0.0062904	-0.036425	-0.0608207	0.0229945	0.0228799
0.01	-0.14663	-0.0280482	-0.00627223	-0.0406608	-0.0681788	0.0254586	0.0257092
0.011	-0.156809	-0.0301782	-0.00623175	-0.0438706	-0.0741235	0.0273473	0.0279976
0.012	-0.163809	-0.0315804	-0.00620642	-0.0460038	-0.0786089	0.0286911	0.029735
0.013	-0.167979	-0.0324162	-0.00615192	-0.0472327	-0.0817773	0.0296225	0.0309535
0.014	-0.169635	-0.0328246	-0.00605727	-0.0477311	-0.0838085	0.0302642	0.0317672
0.015	-0.168707	-0.0328652	-0.00596484	-0.0475642	-0.0848302	0.030621	0.0323319
0.016	-0.164887	-0.0325553	-0.00592117	-0.0467861	-0.0848386	0.0307292	0.0327025
0.017	-0.158111	-0.0319476	-0.00596392	-0.0455189	-0.0836686	0.0307239	0.0328266
0.018	-0.148812	-0.0311539	-0.00609681	-0.0438895	-0.0812634	0.0306482	0.0327358
0.019	-0.137878	-0.0302587	-0.0062438	-0.0420261	-0.0779813	0.0304182	0.0325335
0.02	-0.126588	-0.0293192	-0.00638868	-0.0401531	-0.074484	0.0299895	0.0321654
0.021	-0.116566	-0.0284343	-0.00662312	-0.038464	-0.0713482	0.0294895	0.0315445
0.022	-0.109413	-0.0276733	-0.00689346	-0.0370097	-0.0688825	0.0292179	0.0308395
0.023	-0.106158	-0.0270632	-0.00702715	-0.0358784	-0.0671479	0.0294018	0.0302637
0.024	-0.107023	-0.0267116	-0.00699936	-0.0352143	-0.0659782	0.0299635	0.029775
0.025	-0.111536	-0.0267009	-0.00690423	-0.0350686	-0.0652248	0.0306057	0.0292437
0.026	-0.118743	-0.0269036	-0.00682527	-0.0353762	-0.0649804	0.0310412	0.0286669
0.027	-0.127509	-0.0270819	-0.00683613	-0.0359899	-0.0653829	0.0311274	0.028114
0.028	-0.136773	-0.0270973	-0.00699314	-0.036787	-0.0663463	0.0308964	0.0276059
0.029	-0.145667	-0.026942	-0.00732141	-0.0376849	-0.0675423	0.0305093	0.0271114
0.03	-0.15352	-0.0266311	-0.00783315	-0.0385166	-0.0686264	0.0301336	0.0266531
0.031	-0.159824	-0.026234	-0.00844655	-0.0391237	-0.0694384	0.0298361	0.0263446
0.032	-0.164362	-0.0258639	-0.00891295	-0.0395491	-0.069959	0.0295968	0.026252
0.033	-0.167211	-0.0254936	-0.00903519	-0.0399519	-0.0702161	0.0294474	0.0263022
0.034	-0.168506	-0.0250509	-0.00884423	-0.040381	-0.0702764	0.0294843	0.0264137
0.035	-0.168376	-0.024628	-0.00845488	-0.0407198	-0.0702188	0.0297037	0.0265839
0.036	-0.166995	-0.0243699	-0.00793815	-0.0408254	-0.0701139	0.0300368	0.026833
0.037	-0.16463	-0.0242561	-0.0073056	-0.0406695	-0.0700113	0.030505	0.0271848
0.038	-0.161717	-0.0241777	-0.00655672	-0.0403089	-0.069903	0.0311426	0.0276409
0.039	-0.158682	-0.0241589	-0.00573537	-0.0398174	-0.0697804	0.0318341	0.0281333
0.04	-0.155675	-0.0242786	-0.00486416	-0.0392889	-0.0696842	0.0323507	0.0286096
0.041	-0.152736	-0.0245575	-0.00391928	-0.0387834	-0.0696018	0.0325418	0.0291142
0.042	-0.150099	-0.0249748	-0.00290511	-0.0383265	-0.0694008	0.0324145	0.0297031
0.043	-0.148083	-0.0253842	-0.00187532	-0.0379656	-0.0689871	0.0320445	0.0303629
0.044	-0.146828	-0.0255776	-0.000936126	-0.0377435	-0.0684561	0.0315133	0.0310243
0.045	-0.146306	-0.0255057	-0.00019422	-0.0376802	-0.0679493	0.0309721	0.0315688
0.046	-0.146467	-0.0253016	0.000303018	-0.0377779	-0.0674989	0.0306112	0.0318809
0.047	-0.147213	-0.0250882	0.000489064	-0.0380171	-0.0670989	0.0304645	0.0320007
0.048	-0.148398	-0.0247932	0.000310772	-0.0383261	-0.0667783	0.0304245	0.0320283
0.049	-0.149989	-0.0242444	-0.000144123	-0.0385911	-0.0665971	0.0304466	0.0319363
0.05	-0.152018	-0.0234379	-0.000733109	-0.0387144	-0.0666465	0.0305167	0.0317135
0.051	-0.154369	-0.0226206	-0.00138924	-0.0386233	-0.0670168	0.0305416	0.0314102
0.052	-0.156725	-0.0221696	-0.00209326	-0.0383249	-0.0676966	0.0304771	0.030986
0.053	-0.15875	-0.022387	-0.00281212	-0.0379501	-0.068497	0.0304131	0.0303716
0.054	-0.160382	-0.0233234	-0.00349851	-0.0377021	-0.0691976	0.0304801	0.0296109
0.055	-0.161768	-0.0247322	-0.00413048	-0.0377368	-0.069745	0.0307982	0.0288086
0.056	-0.162938	-0.0261754	-0.00469274	-0.0380131	-0.0701997	0.0313904	0.0280116
0.057	-0.163741	-0.027282	-0.00513288	-0.0383669	-0.070585	0.0320815	0.0272515
0.058	-0.164074	-0.027989	-0.00543298	-0.0387292	-0.0708361	0.0326308	0.0266463
0.059	-0.163973	-0.0284701	-0.00563603	-0.0391128	-0.0709049	0.0329313	0.026337
0.06	-0.163487	-0.0288037	-0.00579912	-0.0394462	-0.0708702	0.0330118	0.0263473
0.061	-0.162619	-0.028848	-0.0059727	-0.0395723	-0.0707957	0.0328896	0.0265874
0.062	-0.161435	-0.028466	-0.00614863	-0.0394215	-0.0705677	0.0325375	0.0269732
0.063	-0.160081	-0.0276694	-0.0063145	-0.0391711	-0.0700629	0.0320319	0.027457
0.064	-0.15874	-0.0265794	-0.00651659	-0.0391007	-0.0693127	0.0315604	0.0279595
0.065	-0.157587	-0.0253993	-0.00672566	-0.0392148	-0.0684212	0.0312291	0.0284207
0.066	-0.156688	-0.0243099	-0.00683912	-0.0392924	-0.0675758	0.0309613	0.0288589
0.067	-0.15606	-0.023354	-0.00687912	-0.039245	-0.0670004	0.0306402	0.0292546
0.068	-0.155715	-0.0224846	-0.00694026	-0.0391431	-0.0667321	0.0302993	0.0295755
0.069	-0.155547	-0.0216817	-0.00704275	-0.0390339	-0.0666555	0.0301038	0.0298626
0.07	-0.155437	-0.0209478	-0.00714509	-0.0388723	-0.066715	0.0301817	0.0300985
0.071	-0.155427	-0.0202736	-0.00717486	-0.0386044	-0.0669534	0.0305553	0.0301942
0.072	-0.155623	-0.0197282	-0.00717276	-0.03827	-0.0673785	0.0312025	0.0301006
0.073	-0.155813	-0.0194433	-0.00731248	-0.0379883	-0.0678933	0.0320266	0.0298561
0.074	-0.155163	-0.0194789	-0.00763823	-0.0378665	-0.0684034	0.0327817	0.0296033
0.075	-0.152584	-0.0198155	-0.00807077	-0.0379023	-0.0688475	0.0332254	0.0294729
0.076	-0.147408	-0.0203391	-0.00862471	-0.0380021	-0.0691067	0.0333121	0.0294952
0.077	-0.139789	-0.020863	-0.00933404	-0.0381644	-0.0690774	0.033108	0.0296504
0.078	-0.130738	-0.0213236	-0.0101277	-0.0384684	-0.0688256	0.0326885	0.0298807
0.079	-0.12185	-0.0217958	-0.0109198	-0.0388711	-0.0684846	0.032188	0.0300733
0.08	-0.114762	-0.0223105	-0.0116278	-0.0392642	-0.0680754	0.0317372	0.030084
0.081	-0.110575	-0.0228408	-0.0120736	-0.039608	-0.0675614	0.03131	0.0297494
0.082	-0.109631	-0.0233763	-0.0120066	-0.0398987	-0.0669748	0.0307549	0.0289448
0.083	-0.111716	-0.0239132	-0.0113049	-0.0401234	-0.066408	0.0300144	0.0277447
0.084	-0.116278	-0.0244443	-0.0101016	-0.0402644	-0.0659575	0.0291958	0.0263956
0.085	-0.122454	-0.0249318	-0.00866638	-0.040368	-0.0657616	0.0284597	0.0250578
0.086	-0.129229	-0.0252877	-0.00728842	-0.0405098	-0.0659678	0.0279305	0.0237352
0.087	-0.135813	-0.0254561	-0.0062345	-0.0406585	-0.0665694	0.027611	0.0224551
0.088	-0.141726	-0.025447	-0.005679	-0.040738	-0.0673666	0.0273932	0.0214106
0.089	-0.146592	-0.0253011	-0.00566409	-0.0407519	-0.0681379	0.0272403	0.0208672
0.09	-0.150214	-0.0250913	-0.00611014	-0.0406924	-0.0688399	0.027257	0.0209885
0.091	-0.152713	-0.024892	-0.00685801	-0.0405223	-0.0695458	0.0275495	0.0217692
0.092	-0.154312	-0.0247387	-0.00772437	-0.040318	-0.0702112	0.0281451	0.0230293
0.093	-0.155127	-0.024618	-0.00853502	-0.0401667	-0.0706511	0.0290184	0.0245091
0.094	-0.155281	-0.0245139	-0.00924135	-0.0401147	-0.0707358	0.0300466	0.0259695
0.095	-0.154997	-0.0244734	-0.010033	-0.0402334	-0.0704898	0.0309904	0.0272374
0.096	-0.154457	-0.024499	-0.011103	-0.0404467	-0.0700322	0.031638	0.0282577
0.097	-0.153695	-0.0244831	-0.0123143	-0.0405929	-0.0694173	0.0319351	0.0290589
0.098	-0.152706	-0.0243667	-0.0133069	-0.0406765	-0.0685174	0.031963	0.0296819
0.099	-0.151598	-0.0241681	-0.0138664	-0.0407544	-0.067217	0.0317824	0.0301616
0.1	-0.150497	-0.0239127	-0.014005	-0.0408152	-0.0656087	0.0313138	0.0304844
0.101	-0.149405	-0.0236756	-0.013783	-0.0408428	-0.0639092	0.030535	0.0305604
0.102	-0.148301	-0.0235255	-0.0132566	-0.0407658	-0.062378	0.0296898	0.0303441
0.103	-0.147261	-0.0234354	-0.0124942	-0.0405033	-0.0612433	0.0290878	0.0299292
0.104	-0.146392	-0.0233887	-0.0115631	-0.0401021	-0.0606253	0.0288196	0.0294059
0.105	-0.145823	-0.0234235	-0.010599	-0.0396743	-0.0605438	0.028769	0.0288045
0.106	-0.145675	-0.0235592	-0.00970818	-0.0393449	-0.0609499	0.0288129	0.0282062
0.107	-0.145938	-0.0238263	-0.00887305	-0.0392152	-0.0617498	0.0288756	0.0276345
0.108	-0.146531	-0.0242137	-0.0081589	-0.0392598	-0.0627407	0.0288761	0.0269787
0.109	-0.147454	-0.0245867	-0.00764502	-0.0394334	-0.0636444	0.0288053	0.0262284
0.11	-0.148713	-0.0248927	-0.00725514	-0.0397495	-0.0642885	0.0287547	0.0255634
0.111	-0.150178	-0.0252941	-0.00699268	-0.0401592	-0.0646202	0.0287824	0.025124
0.112	-0.151579	-0.0258477	-0.00695545	-0.0405774	-0.0646085	0.028838	0.0248942
0.113	-0.152622	-0.0263437	-0.00709584	-0.0409703	-0.0641989	0.0288233	0.0247838
0.114	-0.153144	-0.0265816	-0.00729488	-0.0412918	-0.0633958	0.0287067	0.0246868
0.115	-0.153168	-0.0265396	-0.00750257	-0.0414644	-0.0623914	0.028584	0.0245545
0.116	-0.152876	-0.026337	-0.00772326	-0.0414738	-0.0614012	0.0285504	0.0244135
0.117	-0.152488	-0.0261412	-0.00797454	-0.041412	-0.0604648	0.0285568	0.024282
0.118	-0.152063	-0.0260891	-0.00819306	-0.0414236	-0.0595218	0.0284938	0.0241384
0.119	-0.151528	-0.0262245	-0.00827062	-0.0415459	-0.0585333	0.028292	0.0239282
0.12	-0.15083	-0.0263759	-0.00821484	-0.041652	-0.0576147	0.0279194	0.0235882
0.121	-0.14997	-0.0262878	-0.00813028	-0.0416885	-0.0570239	0.0274091	0.0231249
0.122	-0.149058	-0.0260062	-0.00805626	-0.0417836	-0.056923	0.0268607	0.0226762
0.123	-0.148324	-0.0258244	-0.00788845	-0.0420061	-0.0572903	0.0264079	0.0224016
0.124	-0.147924	-0.0258858	-0.00756573	-0.0422377	-0.0579871	0.0261563	0.0223612
0.125	-0.147879	-0.0261177	-0.00722794	-0.0423347	-0.0588016	0.0260819	0.0225492
0.126	-0.148089	-0.0264238	-0.00705165	-0.0422738	-0.0595865	0.026083	0.0229457
0.127	-0.148344	-0.0267688	-0.00714266	-0.0421204	-0.0603929	0.0260993	0.0235434
0.128	-0.148523	-0.0271097	-0.00760035	-0.0419697	-0.0612635	0.026074	0.0242755
0.129	-0.148683	-0.0273645	-0.00842864	-0.041942	-0.0620224	0.0259571	0.0250305
0.13	-0.148846	-0.0274621	-0.00938324	-0.0421223	-0.0625142	0.0257816	0.0258172
0.131	-0.148916	-0.0273689	-0.0101067	-0.0425198	-0.0627623	0.0256249	0.0267101
0.132	-0.148774	-0.027139	-0.0103641	-0.04309	-0.0627875	0.0255588	0.0276953
0.133	-0.148354	-0.0269064	-0.0100874	-0.0437246	-0.0625345	0.025692	0.0287043
0.134	-0.14771	-0.0267554	-0.0093704	-0.0443462	-0.0619619	0.0261744	0.0296778
0.135	-0.146925	-0.0266901	-0.00842393	-0.0450526	-0.0611039	0.027116	0.0305442
0.136	-0.145803	-0.0266954	-0.00750168	-0.045997	-0.0600224	0.028451	0.031282
0.137	-0.143804	-0.0267424	-0.00687857	-0.0471628	-0.0587427	0.0298463	0.0319501
0.138	-0.140276	-0.0267907	-0.00678947	-0.0484472	-0.0573458	0.0309697	0.032511
0.139	-0.134678	-0.0267139	-0.00730419	-0.0498016	-0.0561038	0.0317989	0.03278
0.14	-0.126958	-0.0262237	-0.00827057	-0.0511481	-0.0553909	0.0324609	0.0326144
0.141	-0.117868	-0.0249862	-0.00945419	-0.0523635	-0.0553517	0.0329823	0.0320339
0.142	-0.108808	-0.0228277	-0.0107142	-0.0533754	-0.0557919	0.0332955	0.0312146
0.143	-0.101438	-0.0199222	-0.0120654	-0.0542119	-0.0564856	0.0333669	0.0304155
0.144	-0.0971056	-0.0167631	-0.0136161	-0.0549294	-0.057277	0.0332317	0.0298125
0.145	-0.0963361	-0.0138347	-0.0153794	-0.0554536	-0.0579298	0.0329248	0.0293945
0.146	-0.098866	-0.0114167	-0.0171488	-0.0555708	-0.058274	0.0325174	0.029037
0.147	-0.103941	-0.00971177	-0.0186397	-0.0551418	-0.058367	0.0321328	0.0286035
0.148	-0.110628	-0.00889653	-0.0197369	-0.0542611	-0.0582934	0.0318391	0.0279866
0.149	-0.118059	-0.00896772	-0.0205136	-0.0531857	-0.0579855	0.0316298	0.027179
0.15	-0.125499	-0.00975076	-0.0210823	-0.0521886	-0.0573577	0.0314806	0.0262915
0.151	-0.132447	-0.0110682	-0.0214952	-0.0513906	-0.0564847	0.0313329	0.0253812
0.152	-0.138647	-0.0127858	-0.0217806	-0.0506741	-0.0555519	0.0311146	0.024403
0.153	-0.143863	-0.0147494	-0.0220158	-0.0498714	-0.0547762	0.0308463	0.0233572
0.154	-0.147798	-0.0167577	-0.0222543	-0.0490307	-0.0543475	0.030622	0.0223107
0.155	-0.150274	-0.0186585	-0.0224633	-0.048346	-0.0543113	0.0305352	0.0213455
0.156	-0.151323	-0.0203485	-0.0225541	-0.0478491	-0.0546326	0.0305972	0.0205056
0.157	-0.151182	-0.0216992	-0.0223829	-0.0473659	-0.0552407	0.0306261	0.0197433
0.158	-0.150186	-0.0226345	-0.0218604	-0.0467134	-0.0559972	0.0304479	0.0190549
0.159	-0.14864	-0.0231114	-0.0211134	-0.0458432	-0.0568206	0.0301053	0.0185851
0.16	-0.146837	-0.0230874	-0.0203822	-0.0448419	-0.0576651	0.0296956	0.0184326
0.161	-0.144986	-0.0226414	-0.0198132	-0.0438223	-0.0584065	0.0293073	0.0185333
0.162	-0.143158	-0.0219822	-0.0195016	-0.0428668	-0.0589348	0.0290973	0.0187909
0.163	-0.141499	-0.0213314	-0.019585	-0.0420069	-0.059193	0.0291371	0.0192191
0.164	-0.140185	-0.0207987	-0.0200925	-0.0412444	-0.0591076	0.0293083	0.0199105
0.165	-0.139164	-0.0203613	-0.0208118	-0.0406437	-0.0586544	0.0294932	0.020815
0.166	-0.138241	-0.0199602	-0.0214445	-0.0402793	-0.057914	0.0296708	0.0217564
0.167	-0.137328	-0.0195682	-0.0218621	-0.0401009	-0.0570292	0.0297641	0.0226695
0.168	-0.13652	-0.019179	-0.0221299	-0.0400165	-0.0561642	0.0296158	0.0235468
0.169	-0.135957	-0.0187459	-0.0223373	-0.0400293	-0.0554015	0.0291746	0.0243094
0.17	-0.135696	-0.018227	-0.0224798	-0.0401719	-0.0547077	0.0285256	0.0249725
0.171	-0.135738	-0.0176788	-0.0224275	-0.0404074	-0.0540754	0.0278015	0.0256822
0.172	-0.136104	-0.017211	-0.0220724	-0.0406209	-0.0535848	0.0271883	0.0264052
0.173	-0.136834	-0.0169113	-0.0215278	-0.0407159	-0.053315	0.0268213	0.0269573
0.174	-0.137905	-0.0168551	-0.0209624	-0.0408137	-0.0533103	0.026696	0.0272766
0.175	-0.13925	-0.0171728	-0.0204042	-0.0412124	-0.0535885	0.0267251	0.0273728
0.176	-0.140728	-0.0179572	-0.019884	-0.0420947	-0.0541032	0.0267372	0.0273008
0.177	-0.14207	-0.0190622	-0.0194729	-0.0434833	-0.0547342	0.0265766	0.0271808
0.178	-0.143088	-0.0201751	-0.0191816	-0.0453561	-0.0553541	0.0261949	0.027086
0.179	-0.143721	-0.0210065	-0.0189618	-0.0475818	-0.0558932	0.0256013	0.0270466
0.18	-0.143818	-0.021388	-0.0187208	-0.0498878	-0.0563462	0.024928	0.0271202
0.181	-0.14328	-0.0213667	-0.0183105	-0.0519579	-0.056774	0.0244599	0.0273576
0.182	-0.142308	-0.0211775	-0.0176069	-0.0535299	-0.0572985	0.0245127	0.0277358
0.183	-0.141274	-0.0210167	-0.0166738	-0.0545321	-0.0579927	0.025279	0.0281854
0.184	-0.14046	-0.0209074	-0.015701	-0.0550647	-0.0587751	0.0267178	0.0286902
0.185	-0.139939	-0.0208095	-0.0147657	-0.0552061	-0.0594395	0.0286463	0.0292591
0.186	-0.139682	-0.0207135	-0.0138777	-0.0549701	-0.0597438	0.0308824	0.0298198
0.187	-0.139655	-0.0206311	-0.0131745	-0.0543649	-0.0595524	0.0332063	0.0302886
0.188	-0.139816	-0.0206128	-0.0128166	-0.0534365	-0.0589423	0.035332	0.0306484
0.189	-0.140115	-0.0207808	-0.0127849	-0.0523224	-0.0581393	0.0370036	0.0308706
0.19	-0.14047	-0.0212374	-0.0129298	-0.0512022	-0.0573673	0.0380777	0.0309053
0.191	-0.140835	-0.0219139	-0.0131262	-0.0501538	-0.056641	0.0385301	0.0307837
0.192	-0.141192	-0.0226396	-0.0133254	-0.0491447	-0.0557647	0.0383916	0.0306239
0.193	-0.141464	-0.023304	-0.0135189	-0.0481313	-0.0546639	0.0376913	0.0305307
0.194	-0.141606	-0.0238227	-0.0136688	-0.0470741	-0.0534948	0.0364813	0.0305347
0.195	-0.141628	-0.0241067	-0.0137277	-0.0459491	-0.052425	0.0348861	0.0305576
0.196	-0.141483	-0.0241116	-0.0136814	-0.0447197	-0.0514738	0.0330793	0.0304663
0.197	-0.141092	-0.0238107	-0.0134453	-0.0432723	-0.0505874	0.0312606	0.0302847
0.198	-0.140495	-0.0232562	-0.0129057	-0.041558	-0.0498598	0.0296833	0.0302231
0.199	-0.139767	-0.0226156	-0.0120556	-0.0396853	-0.0495025	0.0285492	0.0304412
0.2	-0.138884	-0.0219967	-0.0109379	-0.03781	-0.0496013	0.0278582	0.0308928
0.201	-0.137827	-0.0213985	-0.00962288	-0.0360736	-0.0500199	0.0274816	0.0313451
0.202	-0.136674	-0.0207944	-0.00823807	-0.0345583	-0.0504816	0.0272953	0.0315566
0.203	-0.135494	-0.0201518	-0.00697415	-0.0332908	-0.0507856	0.0272007	0.0314079
0.204	-0.134157	-0.0195068	-0.00604524	-0.0323589	-0.0508727	0.0271574	0.0309097
0.205	-0.132169	-0.0189973	-0.00560444	-0.0319593	-0.0507496	0.0272229	0.0301926
0.206	-0.128855	-0.018738	-0.00571824	-0.0322522	-0.0505544	0.027515	0.0293947
0.207	-0.123701	-0.018755	-0.00631877	-0.0332412	-0.0505115	0.0280516	0.0286074
0.208	-0.116546	-0.0190319	-0.00725717	-0.0348153	-0.0508094	0.0286603	0.0279113
0.209	-0.107767	-0.019526	-0.00841645	-0.0367813	-0.0514843	0.0291665	0.0273419
0.21	-0.0983439	-0.0201293	-0.00962974	-0.0389346	-0.0522825	0.0295162	0.0269067
0.211	-0.0897504	-0.0206894	-0.0106953	-0.0410874	-0.0528564	0.0297195	0.0266684
0.212	-0.0835776	-0.0210847	-0.0115342	-0.0430233	-0.0530308	0.0298227	0.0267203
0.213	-0.0808952	-0.0212488	-0.0121636	-0.0445969	-0.0527843	0.0298062	0.027061
0.214	-0.0819046	-0.0212033	-0.0125729	-0.0458097	-0.0521828	0.0295725	0.0276314
0.215	-0.0861254	-0.0210259	-0.0127252	-0.0466865	-0.0513563	0.0291269	0.0284301
0.216	-0.0928416	-0.0207466	-0.0126207	-0.0471401	-0.0505012	0.0286068	0.0294401
0.217	-0.10135	-0.0203683	-0.0122855	-0.0469934	-0.0498083	0.0281371	0.0305193
0.218	-0.110811	-0.0199296	-0.0117613	-0.0461625	-0.0493474	0.0277329	0.0313989
0.219	-0.120262	-0.0195504	-0.011156	-0.0447846	-0.0491057	0.027377	0.0318428
0.22	-0.128904	-0.0193469	-0.0105777	-0.0431526	-0.0490782	0.0271654	0.0318365
0.221	-0.136176	-0.0192293	-0.0100198	-0.0415944	-0.0492636	0.0272268	0.0315809
0.222	-0.141718	-0.0190042	-0.00948922	-0.0403215	-0.0496243	0.027562	0.0312961
0.223	-0.145449	-0.0186401	-0.00913461	-0.0393342	-0.0501086	0.0281047	0.0310545
0.224	-0.147532	-0.0182434	-0.00908616	-0.0384915	-0.0506905	0.0287825	0.0308649
0.225	-0.148281	-0.0178917	-0.00931018	-0.0376779	-0.051311	0.029442	0.030792
0.226	-0.148053	-0.0176248	-0.00969146	-0.0369058	-0.0518565	0.0299037	0.0308895
0.227	-0.147137	-0.0174769	-0.0101719	-0.0362348	-0.0522196	0.0301028	0.0311238
0.228	-0.14575	-0.01745	-0.0107994	-0.0357355	-0.0523371	0.0300541	0.0314458
0.229	-0.144043	-0.0175664	-0.0116132	-0.0355003	-0.0522835	0.0298037	0.0318913
0.23	-0.142106	-0.0178603	-0.0125051	-0.0355261	-0.052178	0.0294682	0.0324966
0.231	-0.140034	-0.0182821	-0.0132942	-0.0357497	-0.0519163	0.0291695	0.0331421
0.232	-0.137982	-0.0187748	-0.0138206	-0.0361718	-0.0513443	0.0289633	0.0336036
0.233	-0.136101	-0.0193462	-0.0139302	-0.0367861	-0.0506126	0.0288754	0.0337795
0.234	-0.134478	-0.0199617	-0.0135171	-0.0374899	-0.0499911	0.028898	0.0338051
0.235	-0.133223	-0.0204978	-0.0125791	-0.0381152	-0.0495416	0.0289785	0.0338831
0.236	-0.132479	-0.0207986	-0.0112482	-0.0386167	-0.0492142	0.0290975	0.0340643
0.237	-0.132314	-0.0207724	-0.00981131	-0.0391231	-0.0489993	0.0293146	0.0342136
0.238	-0.132741	-0.0205113	-0.00861644	-0.0396572	-0.0488669	0.0297352	0.0341382
0.239	-0.133738	-0.0202275	-0.00787334	-0.0401118	-0.0487818	0.030467	0.0337676
0.24	-0.135196	-0.0200619	-0.00762043	-0.040474	-0.048769	0.0315009	0.0331605
0.241	-0.136895	-0.0200406	-0.00793606	-0.0407967	-0.0488432	0.0326716	0.0323831
0.242	-0.13846	-0.02014	-0.00888875	-0.0411094	-0.04894	0.0337824	0.0314895
0.243	-0.139535	-0.0202773	-0.010263	-0.0414294	-0.0489569	0.0346708	0.0305855
0.244	-0.140089	-0.0203042	-0.0117152	-0.0417758	-0.0488534	0.0352077	0.029805
0.245	-0.140321	-0.0200562	-0.0130441	-0.0421769	-0.048634	0.0353114	0.0292466
0.246	-0.140339	-0.0193891	-0.0141543	-0.0425608	-0.0482259	0.0350019	0.0289864
0.247	-0.140122	-0.0182462	-0.015021	-0.0427683	-0.0475403	0.0343933	0.0290308
0.248	-0.139638	-0.0167252	-0.0156695	-0.0427778	-0.0466016	0.0335859	0.0292598
0.249	-0.138935	-0.0151006	-0.0161425	-0.0426636	-0.0455009	0.032675	0.0294944
0.25	-0.138142	-0.0137144	-0.0165048	-0.0424105	-0.0443415	0.0318054	0.0295631
0.251	-0.137331	-0.0127704	-0.0167348	-0.0419354	-0.0432574	0.0310428	0.0293806
0.252	-0.136424	-0.0122842	-0.0166635	-0.0411648	-0.0424197	0.0303074	0.0289951
0.253	-0.135315	-0.0122431	-0.0161179	-0.0401396	-0.0419869	0.0295959	0.0284425
0.254	-0.134057	-0.012692	-0.0150528	-0.0390466	-0.0419805	0.0290676	0.0276851
0.255	-0.132827	-0.0135415	-0.0135611	-0.0380936	-0.0423065	0.0288427	0.0267627
0.256	-0.13173	-0.0144562	-0.0118509	-0.037457	-0.0429031	0.0289015	0.025825
0.257	-0.130765	-0.0150947	-0.0102016	-0.0372029	-0.0436835	0.0291053	0.0250457
0.258	-0.129974	-0.0154528	-0.00879184	-0.0372101	-0.0445142	0.0292379	0.0245693
0.259	-0.129425	-0.0157793	-0.0076138	-0.0373564	-0.0453611	0.0291244	0.0244096
0.26	-0.129088	-0.0161739	-0.00661134	-0.0376101	-0.0462653	0.0287111	0.0244132
0.261	-0.128907	-0.0165824	-0.00575788	-0.0379045	-0.0472311	0.0280933	0.0244504
0.262	-0.128956	-0.0170276	-0.00508696	-0.0381437	-0.0482116	0.0274893	0.0245245
0.263	-0.129307	-0.0176209	-0.00466278	-0.038249	-0.0490761	0.0270825	0.0245788
0.264	-0.129774	-0.0184356	-0.00448867	-0.0381426	-0.0495768	0.0268944	0.0244775
0.265	-0.130045	-0.0193846	-0.0046032	-0.037755	-0.0495641	0.0268117	0.024238
0.266	-0.129976	-0.0202226	-0.0051441	-0.0370073	-0.0491793	0.026795	0.0239604
0.267	-0.129629	-0.0207372	-0.00615524	-0.0359052	-0.0486451	0.0270473	0.0236097
0.268	-0.129157	-0.0209281	-0.0074476	-0.0346319	-0.0480832	0.0277972	0.0230819
0.269	-0.128735	-0.0209121	-0.0087346	-0.0333746	-0.0475602	0.0289783	0.02238
0.27	-0.128475	-0.0207462	-0.0097977	-0.0322598	-0.0471185	0.030252	0.0216745
0.271	-0.128374	-0.0204257	-0.0104782	-0.0314389	-0.046754	0.0312632	0.0212169
0.272	-0.128167	-0.0199581	-0.0106276	-0.0309794	-0.0463777	0.0318903	0.0211737
0.273	-0.127154	-0.0194406	-0.0101393	-0.0307536	-0.0459267	0.0322793	0.0215344
0.274	-0.124433	-0.0190398	-0.00909425	-0.0305564	-0.0455063	0.0325828	0.0221823
0.275	-0.119361	-0.0188748	-0.00783424	-0.0303313	-0.0453146	0.0328124	0.023013
0.276	-0.111798	-0.0189698	-0.00667318	-0.0301825	-0.0455157	0.0329496	0.0239268
0.277	-0.102204	-0.0192009	-0.00561074	-0.0302695	-0.046165	0.033001	0.0248495
0.278	-0.0916112	-0.0193344	-0.00454732	-0.0307948	-0.0471464	0.0329955	0.0258371
0.279	-0.0814863	-0.0192265	-0.00361349	-0.0318538	-0.0482089	0.0330337	0.0270096
0.28	-0.0734891	-0.0189244	-0.00307119	-0.033305	-0.0490983	0.0332656	0.0284378
0.281	-0.0690256	-0.0186265	-0.00304176	-0.0349199	-0.04966	0.0336918	0.0302321
0.282	-0.0688106	-0.0185077	-0.0034733	-0.0365618	-0.0498612	0.0341175	0.0325635
0.283	-0.072705	-0.0185768	-0.00422175	-0.0381939	-0.0497619	0.0343888	0.0354332
0.284	-0.0798795	-0.0187821	-0.00510609	-0.0398227	-0.0494697	0.0344493	0.0385478
0.285	-0.0891738	-0.0190358	-0.00600224	-0.0413997	-0.0490601	0.0342261	0.0414983
0.286	-0.0994804	-0.0191203	-0.0069326	-0.0427292	-0.0485506	0.0336977	0.0440282
0.287	-0.109964	-0.0188778	-0.00804904	-0.0436172	-0.0480015	0.0329726	0.0460691
0.288	-0.119945	-0.0183848	-0.0094774	-0.0440548	-0.0475221	0.0321962	0.0475369
0.289	-0.128775	-0.0178564	-0.0111725	-0.0441766	-0.047128	0.0314856	0.0483486
0.29	-0.135955	-0.0175201	-0.0129835	-0.0441603	-0.046718	0.0309401	0.0485742
0.291	-0.141267	-0.0174899	-0.0147724	-0.0441895	-0.0461651	0.0305882	0.0483653
0.292	-0.14477	-0.0177343	-0.0164088	-0.044407	-0.0453561	0.0303276	0.0479729
0.293	-0.146652	-0.0180977	-0.0177875	-0.0448028	-0.0442472	0.0300457	0.047871
0.294	-0.14709	-0.0183474	-0.0188997	-0.0452166	-0.0428185	0.0297734	0.0486958
0.295	-0.146285	-0.0183544	-0.0198173	-0.0454587	-0.0408293	0.0295873	0.0510479
0.296	-0.144492	-0.018197	-0.0205426	-0.0453683	-0.03766	0.0294363	0.05533
0.297	-0.141992	-0.0180424	-0.0210089	-0.0448771	-0.0323645	0.0291882	0.0616995
0.298	-0.139105	-0.0180012	-0.0212376	-0.0440437	-0.0238962	0.0288287	0.0700327
0.299	-0.136117	-0.018081	-0.0212596	-0.0429722	-0.0115763	0.0285101	0.0799758
0.3	-0.133236	-0.0181717	-0.021008	-0.041786	0.00445414	0.0283632	0.0911291
0.301	-0.130565	-0.0181299	-0.0203753	-0.0406491	0.0232631	0.0283604	0.103165
0.302	-0.128126	-0.0179166	-0.0192449	-0.0397127	0.043474	0.028416	0.115913
0.303	-0.12597	-0.0175761	-0.0175447	-0.0390704	0.0634824	0.0285638	0.12949
0.304	-0.124208	-0.0171421	-0.0152529	-0.0387585	0.0816771	0.0289647	0.14425
0.305	-0.122948	-0.0166369	-0.0121546	-0.0387772	0.0968644	0.0297864	0.160576
0.306	-0.122187	-0.0161083	-0.00752977	-0.0390597	0.108644	0.0312714	0.178848
0.307	-0.121694	-0.0155935	-0.000152577	-0.0394212	0.117497	0.0338678	0.199543
0.308	-0.120943	-0.0150449	0.011313	-0.0396741	0.124709	0.0381062	0.22307
0.309	-0.119051	-0.0143584	0.0277503	-0.0397792	0.132079	0.0444256	0.24944
0.31	-0.114682	-0.0134503	0.0492354	-0.039744	0.141349	0.0530683	0.278282
0.311	-0.106141	-0.0121646	0.0749845	-0.0393045	0.15379	0.0639819	0.309137
0.312	-0.0918811	-0.0101371	0.103509	-0.0377311	0.170207	0.0768378	0.34151
0.313	-0.0711252	-0.00682645	0.133036	-0.0339686	0.191002	0.0910896	0.374826
0.314	-0.0442841	-0.00157012	0.162017	-0.0270144	0.216207	0.106113	0.408699
0.315	-0.0130527	0.00621674	0.189594	-0.0163431	0.245617	0.121495	0.443248
0.316	0.0200267	0.0165895	0.216047	-0.00206921	0.278884	0.13713	0.478989
0.317	0.0522307	0.0289443	0.24293	0.0151993	0.315629	0.153069	0.516413
0.318	0.0811714	0.042384	0.272623	0.0344715	0.355534	0.169458	0.555508
0.319	0.105233	0.0561323	0.307518	0.0545033	0.398101	0.186483	0.595257
0.32	0.123806	0.0699768	0.349427	0.0741581	0.442317	0.204299	0.633434
0.321	0.137364	0.0845415	0.39931	0.0928768	0.48658	0.223095	0.667113
0.322	0.147535	0.101115	0.457205	0.111047	0.528917	0.243159	0.693682
0.323	0.156832	0.121398	0.522423	0.130009	0.567508	0.264803	0.711538
0.324	0.16804	0.147203	0.593724	0.151749	0.601309	0.288304	0.720039
0.325	0.183772	0.179936	0.669393	0.178524	0.630316	0.31391	0.718804
0.326	0.206192	0.220063	0.747361	0.212392	0.655122	0.342002	0.706797
0.327	0.236715	0.266871	0.825257	0.254678	0.67574	0.373236	0.681909
0.328	0.275718	0.318693	0.900564	0.305574	0.690413	0.408431	0.641511
0.329	0.322382	0.373464	0.970939	0.36405	0.6955	0.448271	0.583573
0.33	0.374746	0.429253	1.03421	0.428132	0.686674	0.492911	0.507562
0.331	0.430033	0.484469	1.08821	0.49537	0.660432	0.541682	0.414896
0.332	0.485107	0.537784	1.13085	0.563197	0.615075	0.592978	0.309044
0.333	0.536984	0.588056	1.16013	0.6292	0.551184	0.644107	0.195145
0.334	0.583274	0.634197	1.17414	0.691386	0.471712	0.691383	0.0791793
0.335	0.622326	0.675127	1.17166	0.748178	0.381589	0.730773	-0.032944
0.336	0.653188	0.709955	1.15297	0.798229	0.286858	0.758687	-0.136258
0.337	0.675739	0.738063	1.11952	0.840428	0.193601	0.772702	-0.227487
0.338	0.691111	0.758955	1.07241	0.873816	0.106957	0.771924	-0.305288
0.339	0.701681	0.772081	1.01029	0.897298	0.0304733	0.756355	-0.370018
0.34	0.710038	0.776837	0.928342	0.909757	-0.0341474	0.725812	-0.423229
0.341	0.71716	0.773135	0.819657	0.910743	-0.0869854	0.679556	-0.467061
0.342	0.720569	0.762233	0.678703	0.901157	-0.12951	0.616874	-0.503731
0.343	0.71375	0.746853	0.50454	0.882944	-0.163838	0.53793	-0.535069
0.344	0.687971	0.730101	0.302171	0.857444	-0.191984	0.444342	-0.562233
0.345	0.635776	0.713352	0.081997	0.823231	-0.215333	0.339415	-0.585738
0.346	0.553817	0.694319	-0.142115	0.775195	-0.234419	0.227887	-0.605493
0.347	0.443791	0.6671	-0.355611	0.706101	-0.24905	0.115143	-0.620921
0.348	0.311812	0.6242	-0.545872	0.609784	-0.25852	0.00642653	-0.631261
0.349	0.166816	0.559171	-0.703899	0.48396	-0.261724	-0.0936945	-0.635857
0.35	0.0185289	0.468957	-0.824967	0.331435	-0.257538	-0.18194	-0.634481
0.351	-0.124283	0.355129	-0.908503	0.159671	-0.245298	-0.256781	-0.627482
0.352	-0.254899	0.223437	-0.957437	-0.0207152	-0.224861	-0.318376	-0.615517
0.353	-0.369295	0.0820397	-0.977345	-0.198044	-0.196436	-0.368293	-0.599291
0.354	-0.466354	-0.0604564	-0.975843	-0.361696	-0.160731	-0.409053	-0.579712
0.355	-0.547641	-0.196419	-0.96174	-0.503708	-0.119178	-0.443372	-0.558029
0.356	-0.61658	-0.320223	-0.943479	-0.619682	-0.0736727	-0.473489	-0.535501
0.357	-0.676978	-0.42885	-0.927731	-0.708785	-0.0261896	-0.500808	-0.513047
0.358	-0.731745	-0.521829	-0.918659	-0.77318	0.0213786	-0.525775	-0.491367
0.359	-0.782229	-0.600729	-0.917694	-0.817215	0.0673312	-0.548018	-0.471154
0.36	-0.827997	-0.668297	-0.92383	-0.846053	0.110196	-0.566678	-0.453004
0.361	-0.867111	-0.727365	-0.934261	-0.864363	0.14879	-0.580673	-0.43728
0.362	-0.896824	-0.779852	-0.945176	-0.875691	0.182329	-0.589028	-0.424106
0.363	-0.914304	-0.826223	-0.95268	-0.882027	0.21048	-0.591171	-0.413333
0.364	-0.917261	-0.865517	-0.953596	-0.883828	0.233313	-0.586966	-0.404641
0.365	-0.904526	-0.895818	-0.945898	-0.880667	0.251187	-0.57674	-0.397781
0.366	-0.876301	-0.914974	-0.928718	-0.871955	0.264692	-0.561435	-0.392481
0.367	-0.833916	-0.921295	-0.902158	-0.85738	0.274583	-0.542407	-0.388317
0.368	-0.779482	-0.913897	-0.867084	-0.837088	0.281686	-0.520901	-0.384962
0.369	-0.715661	-0.892849	-0.824996	-0.811553	0.28681	-0.497992	-0.382271
0.37	-0.64548	-0.859227	-0.777975	-0.781479	0.290596	-0.474801	-0.380064
0.371	-0.572206	-0.814975	-0.728383	-0.747857	0.293501	-0.45244	-0.378085
0.372	-0.499145	-0.76274	-0.678399	-0.711843	0.295851	-0.431828	-0.376076
0.373	-0.429152	-0.705616	-0.629826	-0.674585	0.297856	-0.413574	-0.373832
0.374	-0.36427	-0.646668	-0.584091	-0.637259	0.299679	-0.397879	-0.371291
0.375	-0.305783	-0.588551	-0.542265	-0.600919	0.301473	-0.384641	-0.36847
0.376	-0.254485	-0.533458	-0.505054	-0.566308	0.30338	-0.37371	-0.365298
0.377	-0.210915	-0.483149	-0.47281	-0.53397	0.305561	-0.364908	-0.361673
0.378	-0.175194	-0.438875	-0.445634	-0.504312	0.308175	-0.357977	-0.357604
0.379	-0.146827	-0.401246	-0.423343	-0.47752	0.311157	-0.352654	-0.353198
0.38	-0.124913	-0.370266	-0.405388	-0.453579	0.314103	-0.348615	-0.348591
0.381	-0.10839	-0.345547	-0.391028	-0.432369	0.316577	-0.345455	-0.343874
0.382	-0.0961343	-0.326533	-0.379495	-0.413743	0.318369	-0.342873	-0.339045
0.383	-0.0870815	-0.312553	-0.370094	-0.397599	0.319379	-0.340663	-0.334022
0.384	-0.0804074	-0.302802	-0.362374	-0.383848	0.319488	-0.338548	-0.328731
0.385	-0.075511	-0.296406	-0.356073	-0.372317	0.318577	-0.336334	-0.323264
0.386	-0.0717878	-0.292535	-0.350853	-0.362644	0.316632	-0.334103	-0.317902
0.387	-0.0685968	-0.290417	-0.346327	-0.354353	0.313837	-0.332033	-0.312896
0.388	-0.0654664	-0.289401	-0.342238	-0.347161	0.310508	-0.330122	-0.30823
0.389	-0.06221	-0.288963	-0.338382	-0.340995	0.307017	-0.328143	-0.303663
0.39	-0.058843	-0.288642	-0.334543	-0.335755	0.303704	-0.325841	-0.29897
0.391	-0.0554665	-0.288106	-0.330562	-0.331198	0.30072	-0.323106	-0.294119
0.392	-0.052214	-0.287247	-0.326382	-0.326963	0.298051	-0.319902	-0.289156
0.393	-0.0491597	-0.286111	-0.321997	-0.322697	0.295656	-0.316236	-0.28406
0.394	-0.0461805	-0.284738	-0.317395	-0.318231	0.293523	-0.312246	-0.278822
0.395	-0.0429966	-0.283114	-0.31263	-0.313647	0.291711	-0.308082	-0.27348
0.396	-0.0394646	-0.281246	-0.307832	-0.309135	0.290336	-0.30374	-0.268023
0.397	-0.0357033	-0.279128	-0.303083	-0.304803	0.289544	-0.299181	-0.262439
0.398	-0.0319053	-0.27663	-0.298387	-0.300679	0.289486	-0.294479	-0.256789
0.399	-0.0281848	-0.273635	-0.293772	-0.296777	0.290252	-0.289758	-0.251226
0.4	-0.0245971	-0.270214	-0.289286	-0.293036	0.291849	-0.285071	-0.24591
0.401	-0.0212222	-0.266499	-0.284904	-0.289254	0.294224	-0.280419	-0.240898
0.402	-0.0182223	-0.262535	-0.280589	-0.285257	0.297285	-0.275805	-0.236178
0.403	-0.0158209	-0.258307	-0.276307	-0.281098	0.300976	-0.271201	-0.231747
0.404	-0.0139902	-0.253795	-0.271955	-0.276938	0.305264	-0.266603	-0.2276
0.405	-0.0120493	-0.249065	-0.267452	-0.272843	0.310019	-0.262014	-0.223661
0.406	-0.00889484	-0.244266	-0.262912	-0.268863	0.315092	-0.257378	-0.219766
0.407	-0.00361875	-0.239516	-0.258495	-0.265133	0.320398	-0.252615	-0.215792
0.408	0.00416017	-0.23486	-0.254178	-0.261736	0.325832	-0.247693	-0.211695
0.409	0.0141824	-0.230291	-0.249848	-0.258588	0.331392	-0.242713	-0.207441
0.41	0.0254466	-0.225807	-0.245463	-0.255488	0.337203	-0.237812	-0.203042
0.411	0.0363414	-0.221483	-0.241041	-0.252257	0.343268	-0.233011	-0.198543
0.412	0.0452456	-0.217457	-0.236613	-0.248819	0.349302	-0.22828	-0.193947
0.413	0.0511073	-0.213835	-0.232266	-0.245116	0.354799	-0.223589	-0.189315
0.414	0.053556	-0.210596	-0.228155	-0.24108	0.359418	-0.218844	-0.184752
0.415	0.0528129	-0.207571	-0.22438	-0.236721	0.363345	-0.213998	-0.180269
0.416	0.0495979	-0.204526	-0.220898	-0.232128	0.367167	-0.20913	-0.175774
0.417	0.0449273	-0.201355	-0.217553	-0.22739	0.371493	-0.204346	-0.171227
0.418	0.039816	-0.198064	-0.214204	-0.222485	0.376808	-0.199644	-0.166739
0.419	0.0350743	-0.194543	-0.210745	-0.217333	0.383472	-0.194945	-0.162478
0.42	0.0312709	-0.190638	-0.207095	-0.211969	0.39168	-0.190238	-0.158497
0.421	0.0287588	-0.1864	-0.203271	-0.206561	0.401517	-0.185593	-0.154661
0.422	0.0276507	-0.182071	-0.199356	-0.201297	0.41302	-0.181023	-0.15071
0.423	0.0278945	-0.177858	-0.195452	-0.196251	0.426001	-0.176511	-0.146479
0.424	0.0294408	-0.173862	-0.191704	-0.191319	0.439826	-0.172098	-0.142068
0.425	0.0321739	-0.170132	-0.188207	-0.186362	0.453479	-0.167757	-0.137712
0.426	0.0357792	-0.166651	-0.184926	-0.181316	0.465926	-0.16338	-0.133597
0.427	0.0398475	-0.163359	-0.181759	-0.176215	0.47646	-0.15901	-0.129835
0.428	0.0440635	-0.160269	-0.17852	-0.171193	0.4849	-0.154842	-0.126396
0.429	0.0482636	-0.157343	-0.175	-0.166351	0.491542	-0.150933	-0.123093
0.43	0.0523579	-0.154359	-0.171218	-0.16165	0.496866	-0.147127	-0.11977
0.431	0.0562842	-0.151074	-0.167351	-0.157069	0.50119	-0.143296	-0.116435
0.432	0.0600482	-0.147377	-0.163389	-0.1527	0.504577	-0.139417	-0.113242
0.433	0.063713	-0.14332	-0.159259	-0.14859	0.506895	-0.135473	-0.110301
0.434	0.0672887	-0.13906	-0.155114	-0.144639	0.507811	-0.131448	-0.107598
0.435	0.0706985	-0.134678	-0.151115	-0.14074	0.506795	-0.127284	-0.105029
0.436	0.0738783	-0.130133	-0.14728	-0.136925	0.503358	-0.122836	-0.102472
0.437	0.0768693	-0.125525	-0.14368	-0.133301	0.497464	-0.118103	-0.0998546
0.438	0.0798156	-0.121194	-0.140438	-0.129975	0.489663	-0.11337	-0.0971628
0.439	0.0827834	-0.117413	-0.137577	-0.126999	0.480916	-0.108892	-0.0943689
0.44	0.0856033	-0.114171	-0.135078	-0.124319	0.472606	-0.10467	-0.0913964
0.441	0.08804	-0.111305	-0.132884	-0.121843	0.466483	-0.100657	-0.0882276
0.442	0.0900076	-0.108639	-0.130846	-0.119444	0.464258	-0.096886	-0.0849604
0.443	0.0915263	-0.10602	-0.128812	-0.116966	0.467125	-0.093374	-0.0816951
0.444	0.0926542	-0.103384	-0.126631	-0.114342	0.475461	-0.0901136	-0.0785422
0.445	0.0935335	-0.100711	-0.124188	-0.111584	0.488741	-0.0870908	-0.075685
0.446	0.0944119	-0.0979619	-0.121511	-0.108755	0.505755	-0.0842441	-0.0731918
0.447	0.095508	-0.0951184	-0.118675	-0.105907	0.524944	-0.0814611	-0.0709638
0.448	0.0968317	-0.0921855	-0.115659	-0.103012	0.544704	-0.078616	-0.0689534
0.449	0.0982788	-0.0891614	-0.112403	-0.099992	0.56366	-0.0756536	-0.0672483
0.45	0.0998286	-0.0860498	-0.10893	-0.096714	0.580797	-0.0726105	-0.0659712
0.451	0.101469	-0.0828814	-0.105356	-0.0931006	0.595499	-0.0694546	-0.0651483
0.452	0.103134	-0.0796982	-0.101834	-0.0893282	0.607607	-0.0660543	-0.0646664
0.453	0.104804	-0.076591	-0.0984997	-0.0856992	0.617407	-0.0623847	-0.064364
0.454	0.106484	-0.0736698	-0.095457	-0.0824097	0.625477	-0.0586095	-0.064138
0.455	0.10818	-0.07101	-0.0928416	-0.0795762	0.632485	-0.0549396	-0.0639765
0.456	0.109947	-0.0686598	-0.0907061	-0.0772832	0.638981	-0.0515472	-0.0639605
0.457	0.111855	-0.0665614	-0.0889159	-0.0755045	0.645224	-0.0485981	-0.0641655
0.458	0.113893	-0.0645919	-0.0873831	-0.0740428	0.651154	-0.0461709	-0.0645161
0.459	0.116003	-0.0627066	-0.0861431	-0.072681	0.656493	-0.0441789	-0.0648667
0.46	0.118196	-0.06087	-0.085119	-0.0713586	0.66086	-0.0425044	-0.0651502
0.461	0.120496	-0.0589993	-0.0841575	-0.0701279	0.663925	-0.0411212	-0.0653887
0.462	0.122884	-0.0570802	-0.083213	-0.0690882	0.665544	-0.0399975	-0.0655836
0.463	0.125393	-0.0551891	-0.0822699	-0.0683387	0.665702	-0.0390147	-0.0655337
0.464	0.128069	-0.0533847	-0.0812454	-0.0679252	0.664465	-0.0381065	-0.0650186
0.465	0.130891	-0.0516657	-0.0801155	-0.0678143	0.661982	-0.0372889	-0.0640953
0.466	0.133798	-0.0499599	-0.0789596	-0.0678649	0.658348	-0.0364556	-0.0629851
0.467	0.136723	-0.0481411	-0.0778353	-0.0679202	0.653613	-0.0354051	-0.0619044
0.468	0.139604	-0.0461702	-0.0767878	-0.0679094	0.648034	-0.0341099	-0.0610193
0.469	0.142441	-0.0441073	-0.0758846	-0.0677966	0.642126	-0.0327289	-0.0604528
0.47	0.145284	-0.042037	-0.0751557	-0.067594	0.636487	-0.0315049	-0.0602515
0.471	0.148167	-0.0401128	-0.0745809	-0.0673949	0.631605	-0.0306332	-0.060359
0.472	0.151068	-0.0384409	-0.0741274	-0.0672457	0.627649	-0.0300244	-0.0607636
0.473	0.153874	-0.0369204	-0.0738344	-0.0671015	0.62453	-0.0294545	-0.061517
0.474	0.156405	-0.0354236	-0.0738189	-0.0669372	0.622255	-0.0289084	-0.0625784
0.475	0.158644	-0.0340361	-0.074132	-0.0667941	0.621051	-0.0284796	-0.0637713
0.476	0.161026	-0.0329611	-0.0746863	-0.0667315	0.621097	-0.0281973	-0.0648864
0.477	0.16429	-0.0323006	-0.0753422	-0.0668122	0.622392	-0.0280788	-0.0658227
0.478	0.168998	-0.0320425	-0.0759742	-0.0670779	0.624839	-0.0280915	-0.0666102
0.479	0.175338	-0.0320951	-0.0765005	-0.0674939	0.628288	-0.0281892	-0.0673625
0.48	0.183116	-0.032278	-0.0769423	-0.0679602	0.632545	-0.0284665	-0.0681643
0.481	0.19168	-0.0324512	-0.0773454	-0.0683098	0.637374	-0.0290316	-0.068947
0.482	0.199939	-0.0326261	-0.0776745	-0.0683694	0.642526	-0.0298312	-0.0696065
0.483	0.20673	-0.0328414	-0.0778726	-0.0681139	0.647756	-0.0307204	-0.070137
0.484	0.211222	-0.0329929	-0.0778818	-0.0676412	0.652769	-0.0315596	-0.0705773
0.485	0.213023	-0.0328972	-0.0776081	-0.0670509	0.657279	-0.0322658	-0.0709759
0.486	0.212106	-0.0324923	-0.0770199	-0.066444	0.661012	-0.0328036	-0.0713623
0.487	0.2088	-0.0319034	-0.0762635	-0.0659055	0.663688	-0.0331054	-0.0717375
0.488	0.203719	-0.0313499	-0.0755199	-0.065443	0.665268	-0.0331489	-0.072106
0.489	0.197557	-0.0310122	-0.0748233	-0.0650391	0.666213	-0.0330706	-0.0724404
0.49	0.190989	-0.0309463	-0.0742016	-0.0647561	0.667207	-0.0330203	-0.0726748
0.491	0.18467	-0.0311139	-0.0737885	-0.0646875	0.668678	-0.0330789	-0.0727676
0.492	0.179198	-0.0314738	-0.0736441	-0.0648299	0.67079	-0.0333287	-0.0727024
0.493	0.174979	-0.0319811	-0.0737083	-0.0650981	0.673642	-0.033808	-0.072486
0.494	0.172166	-0.0325137	-0.0739601	-0.06542	0.677262	-0.0344984	-0.0721843
0.495	0.170724	-0.0329245	-0.0743942	-0.0657829	0.681535	-0.0353682	-0.0718434
0.496	0.170475	-0.0332343	-0.0749325	-0.066181	0.686156	-0.0363265	-0.0714089
0.497	0.17114	-0.0336232	-0.0754885	-0.0665088	0.69079	-0.0372944	-0.0707783
0.498	0.172394	-0.0341783	-0.0760119	-0.0666342	0.695291	-0.0382506	-0.0699014
0.499	0.173888	-0.0348295	-0.0764683	-0.0665594	0.699678	-0.0390672	-0.0688713
0.5	0.17534	-0.0354782	-0.0767934	-0.0663477	0.703958	-0.0395614	-0.0678303
0.501	0.176627	-0.0360832	-0.0769226	-0.06603	0.708022	-0.0397124	-0.066813
0.502	0.177644	-0.0366437	-0.0768672	-0.065748	0.711694	-0.0396811	-0.0658104
0.503	0.17822	-0.0371157	-0.0766998	-0.0657818	0.714719	-0.0396891	-0.0648648
0.504	0.178287	-0.0373953	-0.076504	-0.0662593	0.716694	-0.0398564	-0.0640571
0.505	0.177959	-0.0374135	-0.0762956	-0.0670483	0.717213	-0.0401178	-0.063427
0.506	0.177392	-0.0371869	-0.0760491	-0.0680183	0.71621	-0.0403389	-0.0629086
0.507	0.176675	-0.0368032	-0.0758022	-0.0691526	0.713957	-0.0404964	-0.0624269
0.508	0.175792	-0.0364166	-0.0756511	-0.0704273	0.710774	-0.0406271	-0.0620148
0.509	0.174775	-0.0361481	-0.0756706	-0.0717624	0.706888	-0.0406959	-0.0616972
0.51	0.17374	-0.0360044	-0.0758513	-0.0730211	0.702484	-0.0406833	-0.0613602
0.511	0.172709	-0.0359017	-0.0761734	-0.074012	0.69775	-0.0405608	-0.0608762
0.512	0.171678	-0.0356851	-0.0766292	-0.0746205	0.692997	-0.04015	-0.0602081
0.513	0.170778	-0.0352596	-0.0771051	-0.0748784	0.688728	-0.0393414	-0.0593176
0.514	0.170178	-0.0347416	-0.0774269	-0.0748403	0.685373	-0.0383487	-0.0580945
0.515	0.169868	-0.0343174	-0.0774748	-0.0745317	0.682994	-0.0375216	-0.0564243
0.516	0.169682	-0.0340315	-0.0771949	-0.0739433	0.681349	-0.0369988	-0.0543228
0.517	0.169514	-0.0338402	-0.076602	-0.0730624	0.680084	-0.0366627	-0.0519864
0.518	0.169366	-0.0337379	-0.0757338	-0.0720235	0.67888	-0.0363743	-0.0496759
0.519	0.169288	-0.0337673	-0.0746752	-0.0710578	0.677597	-0.036034	-0.0475834
0.52	0.169315	-0.0339289	-0.0736286	-0.0702603	0.676263	-0.0355225	-0.0458085
0.521	0.169362	-0.034161	-0.0727501	-0.0695887	0.674885	-0.0348187	-0.0443875
0.522	0.16927	-0.0343528	-0.0720025	-0.0690377	0.673407	-0.0340163	-0.043303
0.523	0.168973	-0.0343507	-0.0712953	-0.068612	0.67175	-0.0331713	-0.0424736
0.524	0.168507	-0.0341137	-0.0706469	-0.0682775	0.669767	-0.0322537	-0.0417894
0.525	0.167962	-0.0337052	-0.0700704	-0.068078	0.667313	-0.0312124	-0.0411511
0.526	0.167424	-0.0331545	-0.0694214	-0.0681155	0.664372	-0.0300498	-0.0404259
0.527	0.166931	-0.0325167	-0.0685592	-0.0684633	0.660997	-0.0288216	-0.0394647
0.528	0.166505	-0.0318328	-0.0674615	-0.0690697	0.657145	-0.0275837	-0.0382791
0.529	0.16617	-0.0309879	-0.0661255	-0.069659	0.652663	-0.0263515	-0.0370733
0.53	0.16595	-0.0298218	-0.064587	-0.0699107	0.647517	-0.0250761	-0.0360014
0.531	0.165824	-0.0283603	-0.0628986	-0.0696644	0.641999	-0.0236893	-0.0349788
0.532	0.165686	-0.0267683	-0.0610588	-0.0689075	0.636585	-0.0221762	-0.0338592
0.533	0.165485	-0.0251401	-0.0591412	-0.0677568	0.631623	-0.0206326	-0.0326741
0.534	0.165373	-0.0235094	-0.0572987	-0.0663687	0.627214	-0.019168	-0.0315244
0.535	0.165547	-0.0219323	-0.0556344	-0.0648022	0.623348	-0.0176865	-0.0304748
0.536	0.166087	-0.0204864	-0.0541992	-0.0630382	0.619973	-0.0160151	-0.0295704
0.537	0.167112	-0.0192585	-0.0530041	-0.0610714	0.616996	-0.014222	-0.028796
0.538	0.168769	-0.018253	-0.0520872	-0.0589791	0.614376	-0.0125346	-0.0280998
0.539	0.17103	-0.0173883	-0.0515301	-0.0569382	0.612154	-0.0110431	-0.0274116
0.54	0.173721	-0.0166847	-0.0513	-0.0551164	0.610374	-0.00967823	-0.0266685
0.541	0.176641	-0.0162989	-0.0512299	-0.0535491	0.609035	-0.00839199	-0.025869
0.542	0.179606	-0.0163102	-0.0512222	-0.0521834	0.608174	-0.00727023	-0.0250125
0.543	0.182369	-0.0165479	-0.0512979	-0.050955	0.607803	-0.00644006	-0.0240562
0.544	0.18463	-0.0166601	-0.0514293	-0.0497917	0.607726	-0.00586411	-0.0230165
0.545	0.186276	-0.0163668	-0.0515209	-0.0486326	0.607667	-0.0053613	-0.0220374
0.546	0.187382	-0.0156321	-0.0515179	-0.0474162	0.607608	-0.00478907	-0.0212615
0.547	0.187961	-0.0145985	-0.0514002	-0.046109	0.607787	-0.00403143	-0.0206557
0.548	0.188035	-0.0134022	-0.0511051	-0.0447465	0.608369	-0.00299907	-0.0200568
0.549	0.187822	-0.0121396	-0.0505046	-0.0433942	0.609267	-0.00177559	-0.0193579
0.55	0.187685	-0.0109261	-0.04953	-0.0421169	0.610334	-0.000537128	-0.0185537
0.551	0.188112	-0.00980379	-0.0483141	-0.040939	0.611518	0.000625077	-0.0176781
0.552	0.189662	-0.00869457	-0.0470546	-0.0398579	0.612771	0.00171228	-0.0167753
0.553	0.192804	-0.00752902	-0.0458253	-0.038851	0.613958	0.00281344	-0.0158786
0.554	0.197679	-0.00633071	-0.0446197	-0.0378199	0.614864	0.0040223	-0.0149335
0.555	0.203925	-0.00512591	-0.0434223	-0.0366768	0.615254	0.0053093	-0.0137917
0.556	0.210746	-0.00391679	-0.0422145	-0.0354901	0.614964	0.00660354	-0.0123792
0.557	0.217119	-0.00276634	-0.0409715	-0.0344185	0.613968	0.0078991	-0.0108072
0.558	0.222017	-0.00174902	-0.0396879	-0.033552	0.612328	0.009122	-0.00923705
0.559	0.22463	-0.000884228	-0.038396	-0.0329271	0.610102	0.0101183	-0.00772437
0.56	0.224548	-0.000107931	-0.0371662	-0.0325122	0.607496	0.0109132	-0.00629647
0.561	0.221842	0.000659557	-0.0360894	-0.0321718	0.604888	0.011673	-0.00500068
0.562	0.217038	0.00137018	-0.0351702	-0.0318613	0.602474	0.0124583	-0.00383748
0.563	0.210987	0.00194527	-0.0343373	-0.0316895	0.600132	0.013228	-0.00284577
0.564	0.204644	0.00241064	-0.0335569	-0.0316957	0.597737	0.0139411	-0.00208672
0.565	0.198792	0.00279513	-0.0328145	-0.0317439	0.595302	0.0145407	-0.00148683
0.566	0.193924	0.00305699	-0.0320701	-0.0316551	0.592877	0.0149464	-0.000925596
0.567	0.190338	0.00315123	-0.0312833	-0.0313659	0.590486	0.0151727	-0.000379932
0.568	0.18813	0.00304108	-0.0304747	-0.0309203	0.588128	0.0153165	0.000162969
0.569	0.187166	0.00269281	-0.0297251	-0.0303143	0.58588	0.0154259	0.000782627
0.57	0.187214	0.00212861	-0.0290796	-0.0295149	0.583901	0.0155842	0.00154094
0.571	0.188099	0.00143941	-0.0284855	-0.0286008	0.582311	0.0159618	0.00241243
0.572	0.189666	0.000791339	-0.0278072	-0.0276579	0.581161	0.0166039	0.00331114
0.573	0.191722	0.000374581	-0.0269516	-0.0267097	0.58047	0.0173547	0.00417054
0.574	0.194042	0.000283574	-0.0260236	-0.0257656	0.580241	0.0180365	0.0049332
0.575	0.19642	0.000585844	-0.0251768	-0.0247706	0.580489	0.0185739	0.00550855
0.576	0.19871	0.00141237	-0.0243799	-0.0236885	0.581226	0.0189711	0.00586769
0.577	0.200763	0.00282055	-0.0235872	-0.0225812	0.58238	0.0192987	0.00605667
0.578	0.202448	0.00468557	-0.0229252	-0.0214774	0.583802	0.0196812	0.00614441
0.579	0.203717	0.00676234	-0.0225106	-0.0203918	0.585364	0.0201537	0.00626039
0.58	0.204496	0.0088253	-0.0222674	-0.0193547	0.586967	0.0206306	0.00651873
0.581	0.204709	0.010738	-0.0219935	-0.0182744	0.58855	0.0210289	0.0069291
0.582	0.204451	0.0124297	-0.0215514	-0.0170554	0.590108	0.0213427	0.00742973
0.583	0.203955	0.0139195	-0.0210042	-0.0157566	0.591667	0.0216394	0.00794183
0.584	0.203449	0.0152881	-0.0205121	-0.0144279	0.593261	0.0219945	0.00845435
0.585	0.203173	0.0165592	-0.0200977	-0.0129538	0.594983	0.0225062	0.00900856
0.586	0.20336	0.0176478	-0.019643	-0.0111897	0.596894	0.023319	0.00955994
0.587	0.204019	0.0184011	-0.0191197	-0.00919416	0.59885	0.0245059	0.00996165
0.588	0.204951	0.0187691	-0.0186707	-0.00717921	0.600506	0.0259724	0.0101095
0.589	0.20591	0.0188794	-0.0184131	-0.00534388	0.601502	0.0275375	0.0100305
0.59	0.206622	0.0188654	-0.0183154	-0.00384195	0.601727	0.0290588	0.00981205
0.591	0.206837	0.0187559	-0.0182825	-0.00275622	0.60137	0.0304092	0.00952457
0.592	0.206425	0.0185301	-0.0182523	-0.00209242	0.600643	0.0314463	0.00922145
0.593	0.205356	0.0182568	-0.0181698	-0.00181212	0.59951	0.0321643	0.00893286
0.594	0.203701	0.0180594	-0.0179556	-0.00185705	0.59773	0.0327044	0.00869806
0.595	0.201586	0.01792	-0.0176272	-0.00215134	0.595189	0.0330758	0.00860256
0.596	0.199114	0.0178065	-0.0172686	-0.00256619	0.592059	0.0331646	0.00868272
0.597	0.196381	0.0178224	-0.0168481	-0.00292964	0.58857	0.0330275	0.00886955
0.598	0.193552	0.01809	-0.0163118	-0.00317087	0.584899	0.032839	0.00904488
0.599	0.190809	0.0186787	-0.0157438	-0.00337385	0.581182	0.0327069	0.00910639
0.6	0.188225	0.0195387	-0.0152506	-0.00355414	0.577409	0.0326988	0.00906526
0.601	0.185853	0.0205282	-0.0148312	-0.00363771	0.573509	0.032801	0.00907143
0.602	0.183851	0.0215606	-0.0144886	-0.00369223	0.569571	0.032845	0.00923511
0.603	0.182309	0.0225678	-0.0143437	-0.00383023	0.565764	0.032685	0.00947543
0.604	0.181148	0.0234674	-0.0145226	-0.00403066	0.562154	0.032393	0.00968917
0.605	0.180313	0.0242354	-0.015037	-0.00425079	0.558725	0.0321388	0.00990864
0.606	0.179872	0.0248329	-0.015803	-0.0044749	0.555465	0.0320542	0.0101784
0.607	0.179819	0.0251635	-0.0166355	-0.00462983	0.552338	0.0322365	0.0104611
0.608	0.179975	0.0251672	-0.0173487	-0.0045716	0.549341	0.0326824	0.0106253
0.609	0.180129	0.0248747	-0.017943	-0.00417985	0.546555	0.0332963	0.0105134
0.61	0.180205	0.0244042	-0.0184763	-0.00351105	0.544066	0.0339425	0.0101405
0.611	0.180268	0.0239017	-0.0189087	-0.00273669	0.542008	0.0344556	0.0097172
0.612	0.18039	0.0234828	-0.0192189	-0.0019396	0.540681	0.0347573	0.00945712
0.613	0.180593	0.0232446	-0.0194233	-0.00110786	0.540426	0.0349308	0.00943946
0.614	0.18093	0.0232234	-0.0195549	-0.00018522	0.541361	0.0350854	0.00963718
0.615	0.181541	0.0233804	-0.0196529	0.000879963	0.543262	0.035256	0.0100097
0.616	0.182572	0.023704	-0.0196406	0.00200481	0.545814	0.0354625	0.0104625
0.617	0.184067	0.0241399	-0.0194111	0.0030114	0.548855	0.0356615	0.0107764
0.618	0.185922	0.0244307	-0.019005	0.00380138	0.552283	0.0357561	0.0107133
0.619	0.187908	0.0243525	-0.0185361	0.00432221	0.555893	0.0357622	0.0101765
0.62	0.18983	0.0240262	-0.018077	0.00448152	0.559362	0.0357405	0.00929073
0.621	0.19155	0.0237159	-0.0176718	0.00426414	0.562345	0.0356758	0.00835226
0.622	0.192906	0.0235485	-0.0173758	0.0038138	0.56463	0.0355565	0.00762887
0.623	0.193855	0.0235579	-0.0172105	0.0032636	0.566089	0.0353936	0.00721018
0.624	0.194612	0.0237195	-0.0171292	0.00257025	0.566595	0.0351438	0.00703869
0.625	0.195687	0.0239738	-0.017094	0.00167226	0.566222	0.0347386	0.00699536
0.626	0.197698	0.0242893	-0.0171089	0.000644401	0.565261	0.0341979	0.00693783
0.627	0.200998	0.0245855	-0.0171577	-0.000395301	0.563959	0.033648	0.00671238
0.628	0.205565	0.0247491	-0.0171708	-0.00134357	0.562475	0.0332475	0.00625399
0.629	0.211084	0.0247189	-0.0171268	-0.00218379	0.56101	0.0331143	0.00569563
0.63	0.216962	0.0244228	-0.0170931	-0.00306097	0.559823	0.0332561	0.00526001
0.631	0.222385	0.0238578	-0.0170644	-0.0040934	0.559048	0.0336218	0.0050481
0.632	0.226501	0.0232118	-0.0169787	-0.00517363	0.558622	0.0342046	0.00497763
0.633	0.228664	0.0226699	-0.0168276	-0.00605792	0.558416	0.0349583	0.00491723
0.634	0.228552	0.0222848	-0.0165929	-0.0065745	0.558269	0.0357437	0.00479335
0.635	0.226139	0.0220722	-0.0163114	-0.00674708	0.558025	0.036409	0.00456353
0.636	0.221701	0.0220149	-0.0161224	-0.0067119	0.557674	0.0368631	0.00428016
0.637	0.215813	0.0220509	-0.0161068	-0.00655549	0.557273	0.0371124	0.00406244
0.638	0.209229	0.0221152	-0.0162477	-0.00637339	0.556887	0.0371821	0.00393677
0.639	0.202672	0.0221385	-0.0165338	-0.00635334	0.556604	0.0370751	0.00392984
0.64	0.196664	0.0220483	-0.0169995	-0.00660341	0.556385	0.0367636	0.00411756
0.641	0.19147	0.0218455	-0.0176428	-0.00704658	0.556011	0.0361719	0.00449495
0.642	0.187164	0.0216096	-0.0183757	-0.00754279	0.555301	0.0353294	0.00500658
0.643	0.183843	0.0213558	-0.0191372	-0.00796934	0.554205	0.034405	0.00564101
0.644	0.181652	0.021001	-0.0198918	-0.00821243	0.552714	0.0335135	0.00643842
0.645	0.180551	0.0204967	-0.0205152	-0.00822324	0.550809	0.0327065	0.00735757
0.646	0.180277	0.0199526	-0.0208895	-0.00807328	0.548417	0.0320075	0.00822067
0.647	0.180537	0.0195482	-0.0209838	-0.00791809	0.545439	0.0313497	0.0089391
0.648	0.181157	0.0193476	-0.020777	-0.00787055	0.541896	0.0307033	0.00954979
0.649	0.18209	0.0192659	-0.0202699	-0.00785548	0.537833	0.0301509	0.0100728
0.65	0.183329	0.019148	-0.0195408	-0.00768116	0.533109	0.0297552	0.0106107
0.651	0.184849	0.018904	-0.0187228	-0.00717141	0.527509	0.0295227	0.0112147
0.652	0.186553	0.0185236	-0.0179397	-0.00624151	0.520847	0.0294549	0.0116861
0.653	0.188288	0.0180138	-0.017267	-0.00501689	0.512902	0.0295508	0.0119335
0.654	0.189964	0.017426	-0.0167163	-0.00374686	0.503479	0.0297408	0.0121026
0.655	0.191538	0.0168154	-0.0161976	-0.00258857	0.492542	0.0298826	0.0122922
0.656	0.192961	0.016199	-0.0155932	-0.00157835	0.480222	0.0298332	0.0125183
0.657	0.194164	0.0156047	-0.0149068	-0.000724221	0.466783	0.0295585	0.012805
0.658	0.195058	0.0151061	-0.0143001	-2.92237e-05	0.45262	0.0292024	0.0132279
0.659	0.195539	0.0148333	-0.0139659	0.000499291	0.438153	0.0289531	0.0138176
0.66	0.195517	0.0148979	-0.0139262	0.000826983	0.423789	0.0289316	0.0144396
0.661	0.194991	0.0152459	-0.0140429	0.000995667	0.41005	0.0292164	0.0149334
0.662	0.19406	0.0156914	-0.0141452	0.0011485	0.397457	0.0298273	0.0152751
0.663	0.192841	0.0160937	-0.014042	0.00133807	0.386231	0.0306539	0.0155455
0.664	0.191453	0.0164075	-0.0136099	0.00147967	0.376343	0.0314452	0.0158242
0.665	0.190035	0.0166357	-0.012941	0.00153138	0.367749	0.0320355	0.0160797
0.666	0.188676	0.0168155	-0.0122723	0.00150766	0.360381	0.0325128	0.0161962
0.667	0.187349	0.0169986	-0.0117302	0.00141956	0.354167	0.033009	0.0161874
0.668	0.186028	0.0172262	-0.0112818	0.00139442	0.349114	0.0335729	0.0162067
0.669	0.184801	0.0175202	-0.0108703	0.00162502	0.345228	0.0342639	0.0163318
0.67	0.183753	0.0178617	-0.01047	0.00216673	0.342425	0.0351392	0.0165533
0.671	0.182889	0.0183036	-0.0100566	0.00289852	0.340539	0.0361991	0.0168963
0.672	0.18223	0.0189983	-0.00957321	0.00358787	0.339355	0.0373424	0.0173645
0.673	0.181813	0.0199248	-0.00904327	0.00403065	0.338584	0.0384002	0.0179285
0.674	0.181626	0.0208088	-0.00861976	0.00422612	0.33791	0.0392621	0.0186573
0.675	0.181596	0.0213678	-0.008398	0.00435779	0.337113	0.0399238	0.0196226
0.676	0.181634	0.0215043	-0.00830324	0.00455467	0.336048	0.0404206	0.020723
0.677	0.181708	0.0213091	-0.00818852	0.00477607	0.334551	0.0407486	0.0217542
0.678	0.181858	0.0209571	-0.00799944	0.00488481	0.332437	0.0408914	0.0225297
0.679	0.18212	0.0206371	-0.00782114	0.00474674	0.329659	0.0408472	0.0229339
0.68	0.182478	0.0204897	-0.00771639	0.00431217	0.326413	0.0406413	0.0229789
0.681	0.182936	0.0205328	-0.00765202	0.00361947	0.322997	0.0403579	0.0228369
0.682	0.18354	0.0207236	-0.00761012	0.00282854	0.319603	0.0400626	0.0227497
0.683	0.184299	0.021085	-0.00751634	0.00222217	0.316236	0.0397915	0.0228518
0.684	0.185146	0.021727	-0.00722582	0.00198432	0.312927	0.0396182	0.0231092
0.685	0.185954	0.0227552	-0.00675014	0.00208009	0.309833	0.0396321	0.0234032
0.686	0.186593	0.024124	-0.00626067	0.00245112	0.307007	0.0399325	0.0235775
0.687	0.187019	0.0256097	-0.00587655	0.00312033	0.304364	0.0405527	0.023517
0.688	0.187237	0.0269434	-0.00553036	0.00407744	0.301898	0.0414343	0.0232375
0.689	0.187275	0.0279086	-0.00509315	0.0052412	0.299707	0.0425276	0.0227873
0.69	0.187219	0.0284103	-0.00464054	0.00649879	0.297855	0.0437263	0.0221885
0.691	0.18713	0.0285262	-0.00433242	0.00772622	0.296301	0.0448471	0.0215423
0.692	0.186994	0.0283913	-0.00412337	0.00882572	0.294959	0.0457731	0.0210309
0.693	0.186792	0.0280479	-0.00390319	0.00970013	0.293792	0.0465098	0.0207745
0.694	0.186578	0.0275139	-0.0037417	0.0102635	0.292878	0.0470906	0.0207384
0.695	0.186606	0.0269071	-0.00376048	0.0105802	0.292382	0.0474744	0.0208311
0.696	0.187339	0.0263621	-0.00390348	0.0108174	0.29255	0.0475722	0.0210397
0.697	0.189234	0.0259474	-0.0040027	0.011062	0.29374	0.0473579	0.0213849
0.698	0.192505	0.0256988	-0.00398709	0.0113423	0.296315	0.0469424	0.0218476
0.699	0.197062	0.0255893	-0.00386055	0.0117509	0.300511	0.0465174	0.0224353
0.7	0.202488	0.0255329	-0.00356919	0.0124357	0.306277	0.0462366	0.0231882
0.701	0.208009	0.02543	-0.00310223	0.0134186	0.313255	0.0461579	0.0240581
0.702	0.212698	0.0252105	-0.0025992	0.014519	0.320939	0.0462385	0.0248767
0.703	0.215868	0.0249573	-0.00224318	0.0155442	0.328718	0.0463734	0.0254682
0.704	0.217261	0.024862	-0.00215692	0.0164039	0.335926	0.0464887	0.02576
0.705	0.216929	0.0250217	-0.00236401	0.0170485	0.341997	0.0465822	0.0258353
0.706	0.215007	0.0253877	-0.00276618	0.0173477	0.34647	0.0466644	0.0259065
0.707	0.211733	0.0258089	-0.00320907	0.0170872	0.348937	0.0467554	0.026089
0.708	0.207617	0.0261472	-0.00361695	0.016227	0.349198	0.04694	0.0262774
0.709	0.203333	0.0263767	-0.00400754	0.0149537	0.347413	0.0473314	0.0263733
0.71	0.199368	0.0265263	-0.00438357	0.0135146	0.343973	0.0479419	0.0263792
0.711	0.195911	0.0266517	-0.00472124	0.0122002	0.339348	0.0486308	0.0262787
0.712	0.193064	0.0268569	-0.00500895	0.0112861	0.334136	0.049223	0.0261056
0.713	0.190921	0.0272186	-0.00521843	0.0109523	0.328985	0.0496283	0.0259656
0.714	0.1894	0.0277002	-0.00534032	0.0112577	0.324429	0.049796	0.0259358
0.715	0.188242	0.0281587	-0.00538601	0.0120957	0.320839	0.0496681	0.0260653
0.716	0.187136	0.0284628	-0.00528585	0.0132263	0.318355	0.0492827	0.0263594
0.717	0.185772	0.0286152	-0.00496569	0.0144451	0.316916	0.0487882	0.0267844
0.718	0.183835	0.0287562	-0.00450807	0.0157138	0.316422	0.0483234	0.0273284
0.719	0.180956	0.0290363	-0.00408944	0.0170387	0.316797	0.0480056	0.027993
0.72	0.176774	0.0294992	-0.00377489	0.0183258	0.317948	0.0478847	0.0287994
0.721	0.171129	0.0301438	-0.00349264	0.0194192	0.31979	0.0478419	0.0297946
0.722	0.164061	0.0309339	-0.00322514	0.0202107	0.32229	0.0477453	0.0309184
0.723	0.155667	0.0317089	-0.00303373	0.0206799	0.325391	0.0476263	0.0319402
0.724	0.146069	0.0323304	-0.00292677	0.0208449	0.328954	0.0476111	0.0326239
0.725	0.135539	0.0328307	-0.00285549	0.0207303	0.332833	0.0477456	0.0328554
0.726	0.124537	0.0332874	-0.00276494	0.0203599	0.336912	0.0479166	0.0326552
0.727	0.113493	0.0337182	-0.00257891	0.0197712	0.341058	0.0480068	0.0321561
0.728	0.10276	0.0341337	-0.00226661	0.0190195	0.345095	0.0480146	0.0314992
0.729	0.0928267	0.0345135	-0.00194303	0.018115	0.348881	0.0480013	0.0307444
0.73	0.0842594	0.0347687	-0.00167836	0.0170637	0.352423	0.0480918	0.0299394
0.731	0.0774331	0.0348926	-0.0013826	0.0160017	0.355814	0.0484025	0.0291757
0.732	0.0724783	0.0350626	-0.000982003	0.0150681	0.359118	0.0489107	0.0284918
0.733	0.0694047	0.0354329	-0.000464437	0.0142601	0.362324	0.04954	0.0278619
0.734	0.0681346	0.0358472	0.000115557	0.0136074	0.365349	0.0502409	0.0273089
0.735	0.0684834	0.0359517	0.000633253	0.0132751	0.368041	0.0509171	0.0269361
0.736	0.0701819	0.0356274	0.00102237	0.0133896	0.370252	0.051464	0.0268346
0.737	0.072965	0.0350753	0.00131873	0.0138885	0.371906	0.0518533	0.026989
0.738	0.0765958	0.034531	0.00158393	0.0145684	0.372972	0.0520929	0.0272866
0.739	0.0807236	0.0341646	0.00185989	0.0151996	0.373445	0.0521981	0.0276044
0.74	0.084822	0.0340659	0.00220905	0.0156776	0.373331	0.0522259	0.027863
0.741	0.0883464	0.034116	0.00269098	0.0161041	0.372636	0.0522385	0.0280334
0.742	0.0909176	0.0341196	0.00323816	0.0166448	0.371365	0.052186	0.0281671
0.743	0.0923697	0.0340897	0.00375256	0.0173635	0.369503	0.0519372	0.0283671
0.744	0.0927388	0.0341972	0.00424836	0.0181871	0.367059	0.0514916	0.0287192
0.745	0.0922037	0.0345048	0.0046872	0.019025	0.36418	0.0510223	0.0292659
0.746	0.0910051	0.0349636	0.00495386	0.0198704	0.361086	0.050665	0.0299542
0.747	0.089377	0.0355719	0.00502991	0.0207027	0.357997	0.0504409	0.0306802
0.748	0.0874695	0.0363094	0.00493316	0.0214345	0.355172	0.0503595	0.0314405
0.749	0.0853667	0.037057	0.00470233	0.0219677	0.352794	0.0503901	0.0323145
0.75	0.0831665	0.0377066	0.00447742	0.0222314	0.350879	0.0504451	0.0333272
0.751	0.0809997	0.0381843	0.00438536	0.0222401	0.349376	0.0505473	0.0344055
0.752	0.0789485	0.0383777	0.00444466	0.0221393	0.348173	0.0508218	0.0354435
0.753	0.0770405	0.0382463	0.00462865	0.0221119	0.347051	0.0512576	0.0363476
0.754	0.0754005	0.0378743	0.00492788	0.0221722	0.34577	0.0517544	0.0370356
0.755	0.0742257	0.037355	0.00536657	0.0222002	0.344271	0.0522905	0.0374918
0.756	0.0736374	0.0367921	0.00601723	0.0221541	0.342662	0.0527741	0.0377469
0.757	0.0736274	0.0363151	0.00696341	0.0220597	0.340991	0.0530303	0.0377609
0.758	0.0740176	0.0360328	0.00816562	0.0219505	0.339209	0.0530313	0.0374708
0.759	0.0745172	0.0360244	0.00936325	0.0218673	0.33733	0.0528854	0.0369316
0.76	0.0748936	0.036306	0.0102206	0.0218635	0.335442	0.0526992	0.0363143
0.761	0.0750788	0.0368076	0.0105409	0.0220343	0.333576	0.0525687	0.0358274
0.762	0.0751394	0.0374357	0.0103322	0.022392	0.331724	0.0525626	0.035579
0.763	0.0751669	0.0381644	0.00974519	0.0228172	0.329911	0.0526567	0.0355154
0.764	0.0752469	0.039016	0.00887665	0.0232385	0.328131	0.0527927	0.0355808
0.765	0.0755231	0.0399105	0.00774017	0.0236678	0.326327	0.0529641	0.0358376
0.766	0.0761094	0.0406424	0.00647187	0.024141	0.324438	0.0531513	0.0363719
0.767	0.0769592	0.0410295	0.00537969	0.0246824	0.3224	0.0533448	0.037106
0.768	0.0780146	0.041009	0.00472504	0.0252426	0.320181	0.0536228	0.0378033
0.769	0.0793257	0.0406507	0.00456629	0.0257208	0.317806	0.0540424	0.0382748
0.77	0.080939	0.040101	0.00485656	0.0260079	0.315244	0.0545827	0.0384877
0.771	0.0828862	0.0394947	0.0054852	0.026028	0.312391	0.0551932	0.0385134
0.772	0.0851825	0.038907	0.00624454	0.0257909	0.309203	0.0557638	0.0384329
0.773	0.0877026	0.0383481	0.00697777	0.025346	0.305778	0.0561584	0.0383057
0.774	0.090291	0.0378144	0.00765813	0.0246838	0.302262	0.0563594	0.0381356
0.775	0.0929474	0.0372905	0.00826274	0.0237885	0.298777	0.0564604	0.0378791
0.776	0.0956634	0.0367311	0.008735	0.0228111	0.29546	0.0564778	0.0375822
0.777	0.0983158	0.0361706	0.00903692	0.0220243	0.292483	0.0563279	0.0373446
0.778	0.100841	0.0357142	0.00919378	0.0215806	0.29	0.0559996	0.0371761
0.779	0.103261	0.0353702	0.00929402	0.0214181	0.288063	0.0556109	0.037073
0.78	0.105558	0.0351171	0.00934571	0.0214106	0.286497	0.0553194	0.0370674
0.781	0.107718	0.0350372	0.00925879	0.0214961	0.285048	0.0552541	0.0370969
0.782	0.109881	0.0351487	0.00905036	0.0216086	0.283675	0.0554327	0.0370418
0.783	0.112408	0.0352966	0.00887255	0.0216884	0.282438	0.0557462	0.0369432
0.784	0.115679	0.0353529	0.00882847	0.0217247	0.281294	0.0561003	0.0369567
0.785	0.119844	0.0353088	0.00890797	0.0216649	0.28023	0.0564419	0.0371092
0.786	0.12487	0.0352478	0.00909824	0.0214476	0.279299	0.0567295	0.0373076
0.787	0.130634	0.0353621	0.00943218	0.0211033	0.278493	0.0569856	0.0374991
0.788	0.136723	0.0357868	0.00990019	0.0207654	0.277771	0.0572208	0.0376411
0.789	0.142275	0.0364608	0.0104387	0.0205639	0.277091	0.0573934	0.0376365
0.79	0.14631	0.0372101	0.0110067	0.0204394	0.276462	0.0574824	0.0374354
0.791	0.148243	0.0378444	0.0115356	0.0202424	0.275988	0.0574227	0.0370421
0.792	0.14788	0.0382486	0.0118528	0.0199776	0.275721	0.0571164	0.0364608
0.793	0.145196	0.0384419	0.011799	0.0197552	0.275571	0.0565627	0.0358175
0.794	0.140349	0.0385179	0.0113775	0.0196	0.275433	0.0558591	0.0353649
0.795	0.133816	0.0386214	0.0107013	0.0194127	0.275214	0.0551531	0.0352666
0.796	0.12632	0.0389157	0.00994674	0.0191565	0.274821	0.0545841	0.0355236
0.797	0.118589	0.0393814	0.00935039	0.0190042	0.274239	0.0541915	0.0360382
0.798	0.111143	0.0398265	0.00905634	0.0191777	0.27359	0.0539706	0.036649
0.799	0.104261	0.0401709	0.00907783	0.0197471	0.273067	0.0539746	0.0372245
0.8	0.098139	0.0404514	0.00934564	0.0206794	0.272778	0.0542051	0.0377528
0.801	0.0930206	0.0406489	0.0097429	0.0218975	0.272634	0.054568	0.0383211
0.802	0.0891442	0.040738	0.0102066	0.0232532	0.272432	0.054976	0.0390201
0.803	0.0866255	0.0407434	0.010702	0.0246138	0.272117	0.0553338	0.0398164
0.804	0.085468	0.0406968	0.0111469	0.0258876	0.271788	0.0556445	0.0405754
0.805	0.0855428	0.0406194	0.0114127	0.0269823	0.271471	0.0561195	0.0412206
0.806	0.0865358	0.040488	0.0113937	0.0278509	0.271135	0.0569044	0.0417744
0.807	0.0881442	0.0402634	0.0111315	0.0284643	0.270824	0.0578838	0.042296
0.808	0.0902271	0.0400203	0.010868	0.0287938	0.270599	0.0588479	0.0427724
0.809	0.0926524	0.0399025	0.0108231	0.028888	0.270461	0.0596387	0.043103
0.81	0.0951997	0.039902	0.0109083	0.0288909	0.270437	0.0601698	0.0432871
0.811	0.0976575	0.0398846	0.0108611	0.0289726	0.270647	0.0604513	0.0434281
0.812	0.0999535	0.0397999	0.010572	0.0291816	0.271202	0.060571	0.043569
0.813	0.102151	0.0396726	0.010166	0.0294293	0.272102	0.0605687	0.0436888
0.814	0.104326	0.0395063	0.00983447	0.0295949	0.273268	0.0603825	0.0437431
0.815	0.106532	0.0393636	0.00975068	0.0295771	0.274571	0.0599974	0.0436679
0.816	0.108742	0.0393924	0.0101564	0.029406	0.275795	0.0595817	0.0434335
0.817	0.110859	0.039655	0.0112487	0.029237	0.276788	0.0593528	0.0430954
0.818	0.112874	0.04011	0.0130332	0.0292115	0.27756	0.0594253	0.0427048
0.819	0.114826	0.0407174	0.0154372	0.029353	0.27814	0.0598139	0.0422388
0.82	0.116721	0.0413844	0.0183677	0.0295078	0.278493	0.0603569	0.0417172
0.821	0.118519	0.0420121	0.0215551	0.0294484	0.278628	0.0608055	0.0412771
0.822	0.120103	0.0425721	0.0245295	0.029025	0.278673	0.0610702	0.0410498
0.823	0.121367	0.0429714	0.0268641	0.0282426	0.278805	0.0611776	0.0410117
0.824	0.122249	0.0430992	0.0283234	0.0272331	0.279144	0.0611567	0.0410368
0.825	0.122662	0.0429559	0.0287921	0.0261172	0.279728	0.0611109	0.041038
0.826	0.122585	0.0426038	0.0282543	0.024988	0.280521	0.0611994	0.0409501
0.827	0.122155	0.0421197	0.02682	0.0240487	0.281497	0.0614498	0.0407412
0.828	0.121554	0.0415773	0.0247055	0.0235549	0.282695	0.0617531	0.0404931
0.829	0.120957	0.0410546	0.0222405	0.0236089	0.2841	0.0620039	0.0403157
0.83	0.120482	0.040573	0.0198045	0.0241345	0.285624	0.0621549	0.0403028
0.831	0.120047	0.0401201	0.0176445	0.0249342	0.287157	0.0622535	0.0405635
0.832	0.119539	0.0398139	0.0158016	0.0257811	0.288504	0.0623446	0.0410834
0.833	0.119114	0.0397933	0.0142681	0.0265874	0.289518	0.062377	0.0416677
0.834	0.119184	0.0400055	0.013148	0.0274003	0.290276	0.0623566	0.0421756
0.835	0.120143	0.040279	0.0126148	0.028251	0.291014	0.0623495	0.0426305
0.836	0.122016	0.0405007	0.0127493	0.0291313	0.291947	0.0623558	0.0430413
0.837	0.124333	0.04066	0.0133981	0.0300456	0.293153	0.0623666	0.043365
0.838	0.126482	0.0407932	0.0142659	0.0310038	0.294544	0.0623759	0.0435829
0.839	0.128103	0.040953	0.015146	0.0319609	0.295963	0.0623993	0.043661
0.84	0.129066	0.0412084	0.0159396	0.0327821	0.29724	0.0625494	0.0435688
0.841	0.129298	0.0415956	0.0165983	0.0333545	0.298242	0.0629065	0.0433224
0.842	0.128801	0.0420998	0.0170995	0.0336346	0.299015	0.063392	0.0430345
0.843	0.127774	0.0426745	0.0174037	0.0335509	0.299644	0.0638839	0.0428992
0.844	0.12649	0.0432316	0.0174578	0.0330831	0.300039	0.0643235	0.0429691
0.845	0.125083	0.0436658	0.0172548	0.0324381	0.300149	0.0646579	0.0431247
0.846	0.123593	0.0438608	0.0169449	0.031979	0.300042	0.0648543	0.0432614
0.847	0.122047	0.0437347	0.0167588	0.0319584	0.299729	0.0650202	0.0433267
0.848	0.120513	0.0433713	0.016781	0.0324114	0.299231	0.0652757	0.0433118
0.849	0.119079	0.0429737	0.0169467	0.0332677	0.298631	0.0655706	0.0432896
0.85	0.117763	0.042697	0.0172093	0.0344045	0.298042	0.0658036	0.0433596
0.851	0.116559	0.0426177	0.0175803	0.0355816	0.297632	0.0659161	0.0435569
0.852	0.115549	0.0427331	0.0180055	0.0365349	0.297498	0.0658462	0.0438747
0.853	0.114849	0.0429796	0.0183689	0.0371286	0.297565	0.0656429	0.0442932
0.854	0.114456	0.043315	0.0186086	0.0373248	0.297747	0.0655022	0.0447454
[truncated: 2,145 more rows]

## Sheet: V496E_SEC_profile
volume (mL)	absorbance (mAU)
0	0
[truncated: 40,244 more rows]

## Sheet: V496R_surfer_traces
time (s)	current (nA)
[truncated: 3,000 more rows]

[truncated: 5 more sheets: V496R_SEC_profile, V496H_surfer_traces, V496H_SEC_profile, V496W_surfer_traces, V496W_SEC_profile]
