# Supplementary material for: Conduction pathway for potassium through the Escherichia coli pump KdpFABC
Source: eLife. 2025 Nov 19;14:RP107397. doi: 10.7554/eLife.107397 (PMC12629597; doi:10.7554/eLife.107397)
Supplement: Figure 4—source data 1. [file elife-107397-fig4-data1.xlsx]

## Sheet: Fig4B
position of individual water molecules within the tunnel		histogram position of individual water molecules within the tunnel
x
46.287		Bin Center	# values
66.402		5	1
42.834		10	4
37.449		15	1
53.692		20	0
39.445		25	1
48.788		30	1
64.438		35	4
68.24		40	2
61.524		45	5
47.787		50	3
46.287		55	1
50.74		60	1
35.956		65	2
25.301		70	3
71.647
42.834
69.701
38.945
45.806
34.515
33.016
9.826
8.846
5.397
11.308
15.143
11.796
29.282

## Sheet: Fig4C
	mutants
	E1P	V496W	water threshold	V496M	V496E	V496H	V496R
Length [Å]	Radius [Å]
0	1.263	1.094	1.4	1.211	1.244	1.239	1.224
0.5	1.183	1.099	1.4	1.122	1.034	1.101	1.111
1	1.192	1.178	1.4	0.949	0.854	1.043	0.975
1.478	1.256	1.254	1.4	0.917	0.768	1.072	0.918
1.941	1.11	1.161	1.4	0.917	0.773	1.146	0.954
2.441	0.984	1.044	1.4	1.011	0.812	1.022	1.055
2.941	0.947	0.837	1.4	1.004	0.752	0.849	0.972
3.409	0.898	0.732	1.4	0.893	0.8	0.692	0.903
3.909	0.929	0.684	1.4	0.884	0.951	0.788	0.929
4.292	0.932	0.742	1.4	0.971	1.182	0.902	1.047
4.785	0.823	0.903	1.4	1.121	1.245	0.809	1.073
5.206	0.782	1.109	1.4	1.215	1.147	0.767	1.058
5.678	0.783	1.295	1.4	1.194	1.142	0.761	1.139
6.178	0.802	1.222	1.4	1.171	1.056	0.853	1.124
6.678	0.926	1.207	1.4	1.104	0.961	1.026	1.122
7.173	1.124	1.096	1.4	0.984	0.966	1.139	1.212
7.673	1.078	1.073	1.4	0.96	1.069	1.049	1.387
8.173	1.127	1.129	1.4	1.036	1.26	1.051	1.528
8.673	1.266	1.24	1.4	1.204	1.464	1.086	1.354
9.173	1.483	1.383	1.4	1.393	1.656	1.126	1.228
9.673	1.762	1.683	1.4	1.573	1.715	1.039	1.297
10.119	1.787	1.945	1.4	1.806	1.682	0.982	1.311
10.619	1.823	2.045	1.4	1.907	1.547	1.017	1.411
11.118	1.882	1.892	1.4	1.733	1.44	1.147	1.59
11.617	2.006	1.751	1.4	1.538	1.416	1.329	1.608
12.092	2.156	1.678	1.4	1.417	1.344	1.471	1.685
12.529	2.121	1.665	1.4	1.378	1.34	1.515	1.808
12.998	2.145	1.5	1.4	1.324	1.31	1.538	1.791
13.498	1.922	1.401	1.4	1.298	1.377	1.502	1.586
13.983	1.724	1.395	1.4	1.36	1.452	1.548	1.451
14.483	1.577	1.469	1.4	1.499	1.53	1.553	1.397
14.983	1.505	1.59	1.4	1.622	1.587	1.493	1.356
15.458	1.477	1.579	1.4	1.71	1.668	1.381	1.313
15.958	1.404	1.597	1.4	1.787	1.755	1.271	1.355
16.458	1.414	1.523	1.4	1.78	1.726	1.249	1.482
16.958	1.507	1.472	1.4	1.631	1.695	1.315	1.641
17.458	1.677	1.492	1.4	1.498	1.739	1.354	1.739
17.893	1.736	1.513	1.4	1.439	1.709	1.378	1.808
18.314	1.837	1.394	1.4	1.439	1.481	1.427	1.764
18.785	1.804	1.265	1.4	1.493	1.287	1.472	1.65
19.229	1.735	1.252	1.4	1.508	1.169	1.565	1.501
19.678	1.6	1.257	1.4	1.478	1.112	1.672	1.415
20.178	1.506	1.305	1.4	1.528	1.145	1.642	1.4
20.678	1.493	1.425	1.4	1.555	1.254	1.606	1.44
21.166	1.479	1.517	1.4	1.51	1.409	1.638	1.508
21.666	1.497	1.623	1.4	1.66	1.631	1.64	1.468
22.164	1.566	1.588	1.4	1.848	1.821	1.578	1.507
22.664	1.688	1.507	1.4	1.93	2.016	1.413	1.579
23.16	1.78	1.497	1.4	2.012	2.22	1.296	1.608
23.65	1.901	1.565	1.4	2.075	2.253	1.264	1.709
24.05	1.978	1.712	1.4	1.969	2.279	1.322	1.86
24.533	1.965	1.684	1.4	1.891	2.196	1.45	1.945
25.009	1.85	1.579	1.4	1.885	2.03	1.473	1.982
25.492	1.936	1.497	1.4	1.779	1.927	1.567	2.088
25.992	2.016	1.493	1.4	1.719	1.896	1.686	2.008
26.412	1.933	1.572	1.4	1.634	1.937	1.722	1.895
26.912	1.75	1.72	1.4	1.548	2.028	1.673	1.853
27.412	1.634	1.591	1.4	1.541	2.105	1.694	1.868
27.912	1.579	1.482	1.4	1.616	2.287	1.769	1.734
28.412	1.604	1.453	1.4	1.766	2.523	1.67	1.674
28.912	1.708	1.515	1.4	1.925	2.675	1.925	1.59
29.412	1.882	1.643	1.4	1.806	2.622	1.956	1.574
29.912	2.113	1.826	1.4	1.738	2.433	1.936	1.629
30.279	2.209	1.865	1.4	1.747	2.147	1.913	1.749
30.779	2.042	1.671	1.4	1.823	1.906	1.879	1.924
31.279	1.941	1.646	1.4	1.965	1.719	1.838	1.849
31.779	1.91	1.817	1.4	2.02	1.602	1.872	1.767
32.279	1.948	2.029	1.4	1.968	1.562	1.977	1.747
32.757	1.989	2.178	1.4	1.987	1.596	2.147	1.8
33.257	1.936	2.239	1.4	2.075	1.701	2.368	1.925
33.757	1.954	2.209	1.4	2.179	1.516	2.218	2.076
34.257	2.043	2.097	1.4	2.107	1.38	1.962	1.998
34.757	2.197	2.058	1.4	2.057	1.323	1.757	1.989
35.244	2.386	2.095	1.4	2.078	1.348	1.617	2.052
35.739	2.331	2.045	1.4	2.151	1.451	1.553	2.176
36.199	2.3	1.89	1.4	2.218	1.625	1.568	2.17
36.699	2.172	1.642	1.4	2.295	1.865	1.657	2.094
37.199	2.108	1.446	1.4	2.281	2.111	1.545	2.088
37.699	2.113	1.267	1.4	2.054	2.186	1.395	2.151
38.194	2.163	1.147	1.4	1.887	2.302	1.317	2.219
38.694	2.222	1.131	1.4	1.78	2.208	1.323	2.296
39.152	2.301	1.213	1.4	1.744	2.15	1.415	2.409
39.652	2.282	1.352	1.4	1.751	2.161	1.581	2.433
40.152	2.328	1.493	1.4	1.757	2.234	1.808	2.304
40.652	2.432	1.615	1.4	1.774	2.243	2.054	2.214
41.042	2.432	1.762	1.4	1.858	2.111	2.119	2.043
41.542	2.495	1.998	1.4	2.012	2.043	2.211	1.718
42.012	2.523	2.273	1.4	2.227	2.044	2.02	1.443
42.506	2.4	2.254	1.4	2.493	2.096	2.025	1.231
43.006	2.277	2.365	1.4	2.586	2.17	1.869	1.098
43.506	2.218	2.498	1.4	2.639	2.003	2.061	1.057
44.006	2.221	2.639	1.4	2.447	1.896	2.121	1.112
44.506	2.285	2.685	1.4	2.2	1.861	2.213	1.254
45.006	2.413	2.496	1.4	2.008	1.9	2.062	1.236
45.506	2.597	2.253	1.4	1.867	1.985	1.946	1.26
45.968	2.719	2.068	1.4	1.747	2.116	1.898	1.371
46.378	2.823	1.952	1.4	1.662	2.255	1.924	1.56
46.822	2.703	1.889	1.4	1.586	2.313	1.957	1.668
47.322	2.44	1.843	1.4	1.522	2.414	1.917	1.617
47.822	2.224	1.748	1.4	1.519	2.5	1.761	1.62
48.322	2.066	1.513	1.4	1.595	2.577	1.676	1.593
48.822	1.974	1.316	1.4	1.686	2.557	1.669	1.646
49.322	1.951	1.302	1.4	1.74	2.48	1.678	1.56
49.763	1.879	1.295	1.4	1.547	2.249	1.757	1.469
50.201	1.786	1.373	1.4	1.384	2.074	1.908	1.433
50.701	1.74	1.521	1.4	1.302	1.962	2.096	1.482
51.201	1.767	1.512	1.4	1.186	1.914	2.178	1.552
51.697	1.73	1.305	1.4	1	1.807	2.326	1.508
52.197	1.759	1.126	1.4	0.899	1.737	2.512	1.542
52.656	1.712	1.043	1.4	0.741	1.663	2.633	1.636
53.155	1.502	1.036	1.4	0.688	1.66	2.719	1.661
53.655	1.317	1.064	1.4	0.747	1.735	2.487	1.762
54.155	1.212	0.891	1.4	0.91	1.808	2.25	1.645
54.655	1.196	0.723	1.4	1.155	1.635	2.092	1.453
55.104	1.032	0.652	1.4	1.116	1.446	1.958	1.337
55.604	0.831	0.703	1.4	0.921	1.283	1.885	1.103
56.104	0.725	0.877	1.4	0.726	1.205	1.809	0.909
56.604	0.728	1.123	1.4	0.631	1.069	1.752	0.799
57.104	0.839	1.272	1.4	0.65	0.831	1.664	0.704
57.604	1.045	1.149	1.4	0.76	0.682	1.653	0.719
58.083	1.141	0.923	1.4	0.949	0.642	1.562	0.842
58.504	0.952	0.783	1.4	1.217	0.715	1.529	1.059
59.004	0.745	0.712	1.4	1.522	0.893	1.578	1.177
59.503	0.619	0.738	1.4	1.551	1.108	1.447	1.057
60.003	0.596	0.887	1.4	1.537	1.242	1.316	0.826
60.503	0.689	0.949	1.4	1.449	1.082	1.27	0.686
61.003	0.885	1.029	1.4	1.427	0.857	1.312	0.655
61.503	1.161	1.167	1.4	1.489	0.723	1.44	0.711
62.003	1.495	1.142	1.4	1.629	0.692	1.397	0.856
62.456	1.689	1.202	1.4	1.666	0.718	1.361	1.091
62.949	1.617	1.247	1.4	1.664	0.85	1.41	1.393
63.449	1.534	1.27	1.4	1.646	1.074	1.455	1.584
63.949	1.531	1.348	1.4	1.707	1.368	1.535	1.557
64.449	1.61	1.448	1.4	1.841	1.542	1.511	1.49
64.949	1.724	1.617	1.4	2.04	1.506	1.469	1.434
65.433	1.835	1.777	1.4	2.236	1.501	1.364	1.462
65.933	1.851	1.905	1.4	2.328	1.477	1.207	1.572
66.433	1.941	1.962	1.4	2.329	1.462	1.009	1.59
66.933	2.097	2.094	1.4	2.392	1.529	0.9	1.678
67.433	2.314	2.195	1.4	2.515	1.675	0.793	1.678
67.933	2.58	2.328	1.4	2.496	1.755	0.784	1.731
68.428	2.874	2.269	1.4	2.433	1.881	0.847	1.778
68.928	2.991	2.266	1.4	2.295	2.072	0.826	1.899
69.355	2.976	2.282	1.4	2.162	2.172	0.924	2.086
69.83	2.874	2.33	1.4	2.094	2.302	1.081	2.314
70.312	2.676	2.446	1.4	2.094	2.49	1.285	2.367
70.812	2.473	2.602	1.4	2.163	2.729	1.294	2.383
71.312	2.325	2.533	1.4	2.297	2.928	1.143	2.461
71.775	2.196	2.526	1.4	2.485	2.986	1.036	2.561
72.275	2.03	2.586	1.4		2.872	1.011	2.527
72.775	1.926	2.709	1.4		2.768	1.024	2.404
73.275	1.891	2.89	1.4		2.625	1.1	2.242
73.775	1.929	3.121	1.4		2.539	1.16	2.142
74.272	2.011	3.273	1.4		2.444	0.999	2.109
74.762	1.935		1.4		2.366	0.848	2.144
75.263	1.904		1.4		2.344	0.769	2.246
75.763	1.945		1.4		2.386	0.592	2.41
76.192	1.94		1.4		2.49	0.752
76.627	1.86		1.4		2.617	0.882
77.12	1.777		1.4			1.08
77.62	1.732		1.4			1.049
78.059	1.806		1.4			1.016
78.516	1.898					1.029
79.016	1.925					1.019
79.516	2.026					1.062
80.016	2.196					1.235
80.516	2.423					1.196
81.016	2.697					1.223
81.464	2.566					1.066
81.956	2.245					0.973
82.456	1.933					0.918
82.956	1.67					0.962
83.455	1.458					1.103
83.952	1.296					1.247
84.452	1.167					1.323
84.947	1.118					1.348
85.447	0.958					1.366
85.947	0.893					1.297
86.391	0.887					1.229
86.823	0.883					1.239
87.256	0.977					1.328
87.696	1.029					1.162
88.196	1.008					0.954
88.689	0.983					0.811
89.189	1.014					0.769
89.689	1.141					0.721
90.189	1.35					0.727
90.665	1.296					0.689
91.165	1.299					0.646
91.665	1.388					0.677
92.136	1.364					0.815
92.614	1.22					0.925
93.114	1.101					0.845
93.614	1.063					0.766
94.114	1.121					0.773
94.614	1.269					0.632
94.983	1.247					0.602
95.468	1.123					0.564
95.968	1.142					0.601
96.375	1.039					0.648
96.846	0.922					0.712
97.346	0.782					0.899
97.832	0.721					1.08
98.33	0.664					1.086
98.83	0.714					0.933
99.33	0.87					0.737
99.83	1.113					0.64
100.33	1.418					0.659
100.822	1.685					0.77
101.273	1.867					0.978
101.773	1.806
102.272	1.829
102.772	1.927
103.267	2.076
103.767	2.094
104.238	2.018
104.661	1.761
105.161	1.422
105.661	1.135
106.161	0.917
106.661	0.788
107.161	0.763
107.655	0.811
108.145	0.837
108.645	0.722
109.145	0.7
109.642	0.679
110.131	0.729
110.631	0.873
111.097	1.035
111.516	1.108
112.016	0.903
112.516	0.79
112.97	0.826

## Sheet: Fig4D
	ATPase activity values
	1	2	3	4	5	6
WT	13.2249	11.1872	14.8269	11.7234	12.015	10.9962
V496M	11.4423	13.4601	11.5381	12.3137	14.1553	11.0993
V496H	9.07001	7.89651	7.91877	9.35941	7.87107	9.39758
V496R	0.641733	0.274722	0.570906	0.974403	0.714705	0.639586
V496E	11.4423	13.4601	11.5381	12.3137	14.1553	11.0993
V496W	6.4	5.4	5.7
