# Supplementary material for: Conduction pathway for potassium through the Escherichia coli pump KdpFABC
Source: eLife. 2025 Nov 19;14:RP107397. doi: 10.7554/eLife.107397 (PMC12629597; doi:10.7554/eLife.107397)
Supplement: Figure 5—figure supplement 2—source data 1. [file elife-107397-fig5-figsupp2-data1.xlsx]

## Sheet: panel B map densities
map density	number of voxels
-1.44907	2
-1.40763	1
-1.36618	2
-1.32474	1
-1.28329	1
-1.24185	7
-1.2004	7
-1.15896	6
-1.11751	14
-1.07607	28
-1.03463	25
-0.99318	38
-0.95174	71
-0.91029	95
-0.86885	123
-0.8274	186
-0.78596	258
-0.74451	352
-0.70307	389
-0.66162	560
-0.62018	801
-0.57873	970
-0.53729	1167
-0.49584	1497
-0.4544	1922
-0.41295	2364
-0.37151	2885
-0.33006	3429
-0.28862	4199
-0.24717	5324
-0.20573	6541
-0.16428	8806
-0.12284	11260
-0.08139	14152
-0.03995	17118
0.0015	16777216
0.04294	18387
0.08438	16226
0.12583	13535
0.16727	10398
0.20872	7753
0.25016	6112
0.29161	4687
0.33305	3506
0.3745	2908
0.41594	2407
0.45739	2020
0.49883	1763
0.54028	1518
0.58172	1307
0.62317	1197
0.66461	1021
0.70606	940
0.7475	846
0.78895	808
0.83039	745
0.87184	716
0.91328	637
0.95473	574
0.99617	513
1.03762	477
1.07906	481
1.1205	413
1.16195	372
1.20339	347
1.24484	378
1.28628	250
1.32773	277
1.36917	248
1.41062	205
1.45206	182
1.49351	171
1.53495	141
1.5764	123
1.61784	90
1.65929	94
1.70073	80
1.74218	59
1.78362	63
1.82507	42
1.86651	32
1.90796	28
1.9494	13
1.99085	28
2.03229	13
2.07374	11
2.11518	4
2.15663	2
2.19807	7
2.23951	1
2.28096	2
2.3224	2
2.36385	1
2.40529	0
2.44674	0
2.48818	0
2.52963	0
2.57107	1
2.61252	0
2.65396	0
2.69541	1

## Sheet: K titration D583A
[K] uM	ATPase (umoles Pi/mg/min)
0	2.2505	2.5056
3	2.2669	2.172	2.9117
10	2.1944	2.23	2.1713
30	2.1068	1.803	2.0391
100	1.9821	1.5328	2.0075
300	1.4357	1.5059	1.5815
1000	0.8858	0.9403	0.8615
2000	0.1588	0.456	0.4224
