# Supplementary material for: Conduction pathway for potassium through the Escherichia coli pump KdpFABC
Source: eLife. 2025 Nov 19;14:RP107397. doi: 10.7554/eLife.107397 (PMC12629597; doi:10.7554/eLife.107397)
Supplement: Figure 5—figure supplement 3—source data 1. [file elife-107397-fig5-figsupp3-data1.xlsx]

## Sheet: WT_surfer_traces
time (s)	current (nA)
0	-1.84467e-05	-7.75216e-05	-2.95232e-05	-1.10623e-05	4.06282e-05	4.06282e-05
0.001	-0.000110197	-0.0004609	-0.000177108	-7.05124e-05	0.000236815	0.000225738
0.002	-0.000299771	-0.00138762	-0.000573864	-0.000223496	0.00064639	0.000627478
0.003	-0.000497702	-0.00294467	-0.00133167	-0.000503712	0.00117327	0.00120143
0.004	-0.00060267	-0.0050979	-0.00244013	-0.000979284	0.00172352	0.00182097
0.005	-0.000615171	-0.00777638	-0.00376537	-0.0017451	0.00230142	0.00238716
0.006	-0.000514412	-0.0108353	-0.00512818	-0.0027283	0.00294011	0.00290786
0.007	-0.000196168	-0.014009	-0.00637813	-0.00363497	0.00363792	0.00341824
0.008	0.000406321	-0.0170781	-0.00743614	-0.00429061	0.00431442	0.00383796
0.009	0.00123937	-0.0199389	-0.00823197	-0.00477978	0.00488078	0.00410461
0.01	0.00210218	-0.0224612	-0.00873034	-0.0051069	0.00537267	0.00437666
0.011	0.00273836	-0.0244963	-0.00898535	-0.00513717	0.00594064	0.00479046
0.012	0.00304944	-0.0259763	-0.00908589	-0.00494158	0.00663028	0.00526063
0.013	0.0031378	-0.0268869	-0.00907929	-0.00476271	0.00724884	0.00571587
0.014	0.00312278	-0.0271546	-0.00890933	-0.00469462	0.00767795	0.0061983
0.015	0.00305265	-0.026669	-0.0085093	-0.00472968	0.00808803	0.00674872
0.016	0.00295844	-0.0254698	-0.00789136	-0.00496726	0.00861451	0.00735214
0.017	0.00288056	-0.0237719	-0.00707247	-0.00560098	0.00920927	0.00790191
0.018	0.00282904	-0.0217337	-0.0061114	-0.00669898	0.00982737	0.00826192
0.019	0.00275885	-0.0193958	-0.00519904	-0.00800272	0.0103536	0.008377
0.02	0.00268342	-0.0169633	-0.00452537	-0.00914683	0.0105275	0.00828874
0.021	0.00268248	-0.0147102	-0.00409739	-0.0100279	0.010239	0.00810412
0.022	0.00274784	-0.0126555	-0.00373317	-0.0106687	0.00974993	0.00792316
0.023	0.00280192	-0.0108152	-0.00328408	-0.0109549	0.00940016	0.00773264
0.024	0.00278523	-0.00938156	-0.00286641	-0.0108225	0.00920492	0.00745739
0.025	0.00269083	-0.00838365	-0.00272472	-0.0104261	0.00901936	0.00712321
0.026	0.00260153	-0.00759819	-0.00287029	-0.00995201	0.00885434	0.00678536
0.027	0.00264769	-0.00685167	-0.00303811	-0.00947631	0.00873515	0.00647789
0.028	0.00293474	-0.00616722	-0.00303968	-0.00905453	0.0085943	0.00628102
0.029	0.0034907	-0.00568647	-0.00291521	-0.00884423	0.00846114	0.0062197
0.03	0.00420013	-0.00553495	-0.00269861	-0.00910499	0.0084641	0.00630883
0.031	0.0048131	-0.00569796	-0.00229242	-0.0100494	0.00870479	0.00667428
0.032	0.00503663	-0.00606981	-0.00166131	-0.0116654	0.00924764	0.00735946
0.033	0.00464402	-0.00647626	-0.000975424	-0.0137337	0.00995918	0.00819926
0.034	0.00360679	-0.00668131	-0.000422425	-0.0160103	0.0104522	0.00899906
0.035	0.00214258	-0.00662606	3.21573e-05	-0.0182991	0.010476	0.00962737
0.036	0.000635897	-0.00640787	0.000557076	-0.0204117	0.0101407	0.00999695
0.037	-0.000546148	-0.0060797	0.00118355	-0.0222372	0.00971262	0.0101135
0.038	-0.00127259	-0.00574016	0.00181135	-0.0238129	0.00941108	0.0100595
0.039	-0.00159953	-0.00553607	0.00239459	-0.0252221	0.00930222	0.00987726
0.04	-0.00155142	-0.00546923	0.00294932	-0.0264434	0.00932021	0.00954054
0.041	-0.00111908	-0.00537227	0.00349351	-0.0273999	0.0094199	0.00903825
0.042	-0.000337289	-0.00513292	0.00397387	-0.0280788	0.00956393	0.0084132
0.043	0.000706517	-0.00481217	0.00426717	-0.0283917	0.0096345	0.0077709
0.044	0.00188784	-0.00443135	0.00438905	-0.02816	0.00952921	0.00721794
0.045	0.00307236	-0.00384889	0.00448625	-0.0273896	0.0092714	0.00677488
0.046	0.00403517	-0.00296001	0.00461947	-0.0263294	0.00904033	0.00642597
0.047	0.00447957	-0.00188163	0.00476135	-0.025308	0.0090882	0.00622099
0.048	0.00428511	-0.000892644	0.00485967	-0.02439	0.0095105	0.00629364
0.049	0.003578	-0.000204033	0.00484592	-0.0229926	0.0101648	0.00671654
0.05	0.00259215	0.000148168	0.00462892	-0.0202163	0.0108515	0.00741964
0.051	0.00156041	0.000226271	0.00410397	-0.0156703	0.0115141	0.00828573
0.052	0.000592502	0.000117027	0.00322844	-0.00981529	0.0122175	0.00916612
0.053	-0.000339057	-6.86972e-05	0.00210258	-0.00369988	0.0129708	0.00988548
0.054	-0.00121742	-0.000128071	0.00102049	0.00157938	0.0137251	0.0103482
0.055	-0.00186905	0.000175168	0.000368295	0.00539239	0.0144331	0.0105789
0.056	-0.00214322	0.000944049	0.000286477	0.00760914	0.0149966	0.0106942
0.057	-0.00211133	0.00203834	0.000505256	0.00827622	0.0152996	0.0108761
0.058	-0.00195306	0.00316651	0.000588122	0.00754538	0.0152865	0.0112304
0.059	-0.00182162	0.00416116	0.000208455	0.00579505	0.0149815	0.0116527
0.06	-0.00181645	0.00501311	-0.000673616	0.00355596	0.0144809	0.0119725
0.061	-0.00194769	0.00569478	-0.00183975	0.00126522	0.0139183	0.0121608
0.062	-0.00218454	0.00608788	-0.00313061	-0.000862047	0.0133933	0.0122932
0.063	-0.00252044	0.00601896	-0.0045845	-0.00279856	0.0128667	0.0124401
0.064	-0.00303043	0.00534884	-0.00621781	-0.00461031	0.0122374	0.0126338
0.065	-0.00386684	0.00403727	-0.00787752	-0.00641429	0.0115541	0.0128028
0.066	-0.00511009	0.00221663	-0.00934418	-0.00837595	0.0110025	0.0127833
0.067	-0.00665286	0.000252805	-0.0104118	-0.0105203	0.0107167	0.01244
0.068	-0.00827696	-0.00144701	-0.0109519	-0.012598	0.0106544	0.0117303
0.069	-0.00983247	-0.00270665	-0.0110726	-0.0142969	0.0106865	0.010764
0.07	-0.0112903	-0.00352156	-0.0110406	-0.0155031	0.0107606	0.00984094
0.071	-0.012596	-0.00390455	-0.0110447	-0.0163017	0.0108672	0.0092693
0.072	-0.0135334	-0.00390807	-0.0111657	-0.0168075	0.0109243	0.00912349
0.073	-0.0138863	-0.00360003	-0.0114392	-0.0170908	0.0108048	0.00927831
0.074	-0.0136472	-0.00313214	-0.0119641	-0.0173197	0.0104902	0.0095603
0.075	-0.0129122	-0.00286123	-0.0128802	-0.0178625	0.0100776	0.00979807
0.076	-0.0118347	-0.00304548	-0.0141322	-0.0190005	0.00960496	0.00992673
0.077	-0.0107264	-0.0035425	-0.0154467	-0.0206771	0.00905218	0.0100601
0.078	-0.0098493	-0.00407884	-0.0165434	-0.0227212	0.00850244	0.0102882
0.079	-0.00916589	-0.00460944	-0.0172843	-0.0250039	0.00807878	0.0104638
0.08	-0.00857212	-0.0052686	-0.0176712	-0.0273125	0.00780257	0.0103378
0.081	-0.00815458	-0.00615058	-0.0177104	-0.0294176	0.00761631	0.00981397
0.082	-0.00803759	-0.00721443	-0.0174035	-0.0312793	0.00742994	0.00902508
0.083	-0.00824951	-0.0083264	-0.0168713	-0.0329988	0.00718508	0.00821755
0.084	-0.00874138	-0.00935722	-0.0162911	-0.0345872	0.00693071	0.00756962
0.085	-0.00938266	-0.0102473	-0.0157661	-0.035854	0.00673328	0.00714008
0.086	-0.0100024	-0.0109633	-0.0152929	-0.0366342	0.00654384	0.00687059
0.087	-0.0104207	-0.0113982	-0.0147929	-0.0370648	0.00626211	0.00661139
0.088	-0.0104557	-0.0114308	-0.0142575	-0.0373519	0.00582048	0.00624313
0.089	-0.0100582	-0.0110573	-0.0138326	-0.0374774	0.00517416	0.00573291
0.09	-0.00936513	-0.0104388	-0.0136237	-0.0373731	0.00430497	0.00509052
0.091	-0.00853871	-0.00985612	-0.0135854	-0.0371026	0.00324605	0.00435387
0.092	-0.00772817	-0.00954112	-0.0136638	-0.0367837	0.00210577	0.00355444
0.093	-0.00711819	-0.00955892	-0.0137907	-0.0364561	0.00101242	0.00271754
0.094	-0.00679414	-0.00989147	-0.0138834	-0.0360685	3.85216e-05	0.00193646
0.095	-0.00668549	-0.0105492	-0.0139483	-0.0355774	-0.000730241	0.00129728
0.096	-0.00676142	-0.0115598	-0.0139836	-0.0350183	-0.00113996	0.000834091
0.097	-0.00709706	-0.0129741	-0.0139437	-0.0344728	-0.00108119	0.000622216
0.098	-0.00768958	-0.0148353	-0.01383	-0.0340172	-0.000560193	0.000765068
0.099	-0.00838204	-0.0170224	-0.0136632	-0.0337682	0.000341605	0.00134777
0.1	-0.00895803	-0.0192433	-0.0134508	-0.0339024	0.00150496	0.0023502
0.101	-0.00924936	-0.0211798	-0.0132519	-0.0345623	0.00280418	0.00354522
0.102	-0.00927202	-0.0225782	-0.0132264	-0.0358041	0.00419412	0.00465124
0.103	-0.00927324	-0.0233585	-0.0135215	-0.0375984	0.00573183	0.00556385
0.104	-0.00947978	-0.0236393	-0.0141322	-0.0397361	0.0074807	0.00630257
0.105	-0.0097841	-0.0235483	-0.0149845	-0.0418179	0.00948669	0.00685825
0.106	-0.00986139	-0.0231244	-0.016053	-0.0434837	0.0117226	0.00720457
0.107	-0.00957871	-0.0224282	-0.0172703	-0.0445555	0.0139841	0.00737727
0.108	-0.00902009	-0.0215855	-0.0184526	-0.0450493	0.0159625	0.00745907
0.109	-0.00823977	-0.0207467	-0.0193835	-0.0451066	0.017438	0.0074711
0.11	-0.00730352	-0.0200773	-0.0199304	-0.0447972	0.0183344	0.00736358
0.111	-0.00633705	-0.0196322	-0.0201249	-0.0441265	0.0186317	0.00712863
0.112	-0.00544111	-0.0192434	-0.0200819	-0.0431577	0.0183672	0.00686962
0.113	-0.00478028	-0.0187233	-0.0198403	-0.0420094	0.0176462	0.00666923
0.114	-0.00460665	-0.0180609	-0.0194088	-0.0408582	0.0165995	0.0064796
0.115	-0.00505179	-0.0173033	-0.018957	-0.0398621	0.0153758	0.00625606
0.116	-0.00602553	-0.0163917	-0.0187765	-0.0390741	0.0141213	0.00597721
0.117	-0.00733436	-0.0152109	-0.0190197	-0.0384794	0.0129136	0.00559389
0.118	-0.00876658	-0.0137265	-0.0196126	-0.0380247	0.01172	0.00514354
0.119	-0.0100526	-0.0119881	-0.0203441	-0.0376584	0.0105191	0.00478368
0.12	-0.0109208	-0.0100783	-0.0209962	-0.0373645	0.00939481	0.00463121
0.121	-0.011248	-0.00811193	-0.0215076	-0.0371167	0.00841504	0.00463531
0.122	-0.0110562	-0.00625513	-0.022004	-0.03686	0.00761536	0.00465171
0.123	-0.0104758	-0.0047316	-0.0227201	-0.0365612	0.0070533	0.00459055
0.124	-0.00977861	-0.00375418	-0.0238638	-0.0362263	0.00667031	0.00447498
0.125	-0.00925935	-0.0033556	-0.0253952	-0.0357787	0.00627231	0.00443438
0.126	-0.0090407	-0.00331835	-0.0270316	-0.0349524	0.00573773	0.00464659
0.127	-0.00907129	-0.00339395	-0.0284857	-0.0334543	0.00511023	0.005182
0.128	-0.00924514	-0.00356613	-0.0295067	-0.0312501	0.0045915	0.00597039
0.129	-0.00947147	-0.00399752	-0.0298115	-0.0286268	0.00444129	0.00694787
0.13	-0.00977088	-0.00475188	-0.0292243	-0.0259649	0.00469623	0.00805075
0.131	-0.0102963	-0.00572457	-0.0278594	-0.0235708	0.00516021	0.00913252
0.132	-0.0111197	-0.00680791	-0.0259914	-0.0216898	0.00576381	0.0100376
0.133	-0.0121092	-0.00786399	-0.0237449	-0.0202237	0.00665878	0.010675
0.134	-0.0130758	-0.00861398	-0.0211341	-0.0183747	0.00788064	0.0110249
0.135	-0.0138734	-0.00881897	-0.0183462	-0.0150337	0.00919126	0.0111407
0.136	-0.0143401	-0.00843529	-0.0156914	-0.00955684	0.010333	0.0111315
0.137	-0.0143165	-0.00756119	-0.0133783	-0.0021088	0.0112093	0.0111312
0.138	-0.013825	-0.00645717	-0.0115401	0.00653708	0.0118324	0.0112432
0.139	-0.013107	-0.00545871	-0.0103261	0.0154819	0.0122099	0.0115013
0.14	-0.0124084	-0.00468679	-0.00983722	0.0240032	0.0122779	0.0118827
0.141	-0.0118587	-0.00402699	-0.0100482	0.0315321	0.0119466	0.01235
0.142	-0.011527	-0.00342229	-0.0107872	0.0375587	0.0111743	0.0128609
0.143	-0.0114357	-0.00299665	-0.011845	0.0416494	0.0100309	0.0133641
0.144	-0.0114704	-0.00293098	-0.0131166	0.0435844	0.00876322	0.0138141
0.145	-0.0114306	-0.00330038	-0.0145507	0.0434372	0.0076925	0.0141467
0.146	-0.0112982	-0.00392253	-0.016061	0.0415346	0.006977	0.0143395
0.147	-0.0112304	-0.00448209	-0.0175194	0.0383534	0.00659205	0.0144799
0.148	-0.0113555	-0.00489165	-0.0187941	0.0343381	0.00649259	0.0145996
0.149	-0.0117756	-0.0052262	-0.0198618	0.0297312	0.00662586	0.0145681
0.15	-0.0125176	-0.00545045	-0.0208499	0.0246564	0.00692564	0.0142629
0.151	-0.0134688	-0.00562175	-0.0218324	0.0193232	0.00738635	0.0137479
0.152	-0.0144451	-0.0060101	-0.0226717	0.0139649	0.00796899	0.0131748
0.153	-0.015223	-0.0067541	-0.0231798	0.00870375	0.00854899	0.0125679
0.154	-0.0156367	-0.00777371	-0.0232933	0.00364366	0.00903592	0.0118554
0.155	-0.0157041	-0.00899509	-0.0230919	-0.000984956	0.0093423	0.0110446
0.156	-0.0155536	-0.0103604	-0.0227794	-0.0048479	0.00940189	0.0102785
0.157	-0.0152789	-0.0118098	-0.0225679	-0.00765916	0.00932211	0.00973358
0.158	-0.014909	-0.0133775	-0.0225502	-0.00932835	0.00921765	0.00949019
0.159	-0.0144249	-0.0150846	-0.0227391	-0.00999278	0.00897071	0.0095229
0.16	-0.0138176	-0.016825	-0.0231534	-0.00992679	0.00844381	0.00973956
0.161	-0.0131756	-0.0185233	-0.0237742	-0.00940953	0.00778362	0.0100096
0.162	-0.0126211	-0.020194	-0.0244791	-0.00858853	0.00723069	0.0102281
0.163	-0.0121498	-0.0217585	-0.0251199	-0.00748781	0.00678212	0.0103667
0.164	-0.0117113	-0.0230309	-0.025593	-0.00614645	0.00630348	0.0104366
0.165	-0.0114285	-0.0239112	-0.0258882	-0.00476692	0.00580487	0.010381
0.166	-0.0115036	-0.0244082	-0.0261021	-0.00368977	0.00541666	0.0101327
0.167	-0.0119575	-0.0244854	-0.0262221	-0.00309889	0.00518759	0.00976875
0.168	-0.0126215	-0.024108	-0.0260738	-0.00287411	0.00508312	0.00940967
0.169	-0.0132734	-0.02342	-0.025586	-0.00281874	0.0050816	0.00910137
0.17	-0.0137668	-0.0227034	-0.0248993	-0.0029432	0.00507643	0.00887226
0.171	-0.0140781	-0.0222358	-0.0243272	-0.00339574	0.00489705	0.0087358
0.172	-0.0141455	-0.0221532	-0.0241524	-0.00417837	0.00453572	0.00866397
0.173	-0.0138827	-0.0223858	-0.0243392	-0.00505969	0.00413569	0.0086496
0.174	-0.0133827	-0.0227709	-0.0245534	-0.00573144	0.00377661	0.00872576
0.175	-0.0127536	-0.0231594	-0.0244276	-0.00604229	0.00342611	0.00887761
0.176	-0.0119629	-0.0234808	-0.0238002	-0.00597532	0.00308133	0.00907247
0.177	-0.0111257	-0.0237731	-0.0227451	-0.00547062	0.00285134	0.00929369
0.178	-0.0105544	-0.0240869	-0.0214722	-0.00450055	0.00286898	0.0094573
0.179	-0.0103479	-0.0244352	-0.0202333	-0.00322795	0.00323757	0.00949303
0.18	-0.0103303	-0.0248677	-0.0192272	-0.00189835	0.00407441	0.00942052
0.181	-0.0104158	-0.0254779	-0.0185811	-0.000629206	0.0053889	0.00923696
0.182	-0.0106649	-0.0262886	-0.0183883	0.000484625	0.00691398	0.00893424
0.183	-0.0110671	-0.0272145	-0.0187007	0.0012401	0.00828504	0.00865664
0.184	-0.0115205	-0.0280919	-0.0194892	0.00153782	0.00933396	0.00859476
0.185	-0.0118648	-0.0286907	-0.0205931	0.00146461	0.0100938	0.00872268
0.186	-0.0118848	-0.0288715	-0.0217109	0.00107777	0.0106588	0.00886144
0.187	-0.0114945	-0.0287415	-0.0225734	0.000388852	0.0111072	0.00890007
0.188	-0.0108306	-0.0285098	-0.023192	-0.00043959	0.0114895	0.00882167
0.189	-0.0100514	-0.0282845	-0.0238645	-0.00112799	0.0119027	0.00868652
0.19	-0.00919357	-0.0280758	-0.0248372	-0.00146037	0.0124182	0.00865194
0.191	-0.00825894	-0.0278364	-0.0259788	-0.00138054	0.0128559	0.00883688
0.192	-0.00735447	-0.0275212	-0.0269156	-0.000997255	0.0129544	0.00920429
0.193	-0.0066647	-0.0271866	-0.0274507	-0.000418175	0.0126622	0.00970504
0.194	-0.00628597	-0.0269209	-0.0277206	0.000388829	0.0120891	0.0103646
0.195	-0.00614407	-0.0267015	-0.0279271	0.0014948	0.0114182	0.0111488
0.196	-0.00605644	-0.0264857	-0.0280631	0.00284206	0.0107981	0.0119307
0.197	-0.00589111	-0.0262849	-0.0279984	0.00422169	0.0102894	0.0125619
0.198	-0.00563648	-0.0260227	-0.0276774	0.0054345	0.00996921	0.0129473
0.199	-0.00530801	-0.0255807	-0.0271383	0.00640949	0.0098826	0.0131378
0.2	-0.00497212	-0.0249451	-0.0264656	0.00714785	0.00992819	0.0131824
0.201	-0.00479476	-0.0242379	-0.0257194	0.00760964	0.00995557	0.0129671
0.202	-0.00482483	-0.0236388	-0.0248296	0.00767092	0.00987917	0.0124786
0.203	-0.00485663	-0.0232021	-0.0236807	0.00728511	0.00961383	0.0119389
0.204	-0.00469111	-0.0229153	-0.0222913	0.00656308	0.00912739	0.011493
0.205	-0.00436357	-0.0228173	-0.0207951	0.00560374	0.00857675	0.011138
0.206	-0.00397391	-0.0229279	-0.0193233	0.00449917	0.00819234	0.0109313
0.207	-0.00352256	-0.023271	-0.017984	0.00338048	0.00811282	0.0109398
0.208	-0.00302851	-0.0238462	-0.0168884	0.00234157	0.00833947	0.0111369
0.209	-0.00253385	-0.0245013	-0.0160847	0.00144574	0.00874892	0.0114633
0.21	-0.00196177	-0.0250668	-0.015478	0.000672777	0.00921185	0.0118887
0.211	-0.00124339	-0.0255214	-0.014854	-1.25667e-05	0.00972274	0.0124621
0.212	-0.000500289	-0.0258658	-0.0139788	-0.000484661	0.0103674	0.0132207
0.213	9.73535e-05	-0.0260776	-0.0127047	-0.000583694	0.0111733	0.01402
0.214	0.000472134	-0.026228	-0.0110548	-0.000335393	0.012063	0.014626
0.215	0.000530372	-0.0263264	-0.00924102	7.2137e-05	0.012978	0.0149486
0.216	0.000171238	-0.0261094	-0.00749573	0.000419284	0.0139587	0.0150257
0.217	-0.000583257	-0.0253514	-0.00598853	0.000500676	0.0150133	0.0148794
0.218	-0.00158046	-0.0242075	-0.00490112	0.000226207	0.0160307	0.0145623
0.219	-0.00257994	-0.0229126	-0.00433205	-0.000264815	0.016922	0.0141513
0.22	-0.00339335	-0.0214944	-0.00421062	-0.000746929	0.0176732	0.0136391
0.221	-0.00398209	-0.0200024	-0.00436045	-0.00116035	0.0182414	0.0130329
0.222	-0.00437919	-0.0186698	-0.00458858	-0.00156154	0.0185747	0.0125107
0.223	-0.00455975	-0.0177262	-0.00480235	-0.00182891	0.0186841	0.0123343
0.224	-0.00443954	-0.0172411	-0.00508973	-0.0016733	0.0185883	0.0126336
0.225	-0.00400969	-0.0171196	-0.0056065	-0.00101255	0.0182904	0.0133402
0.226	-0.0033098	-0.017169	-0.00632984	-0.000144812	0.0178408	0.0142431
0.227	-0.00245049	-0.0172885	-0.00698149	0.000531262	0.0173119	0.015094
0.228	-0.00172771	-0.0175266	-0.00723441	0.000876488	0.0167396	0.0157185
0.229	-0.00139697	-0.0178731	-0.006992	0.00102693	0.0161655	0.0160546
0.23	-0.00146783	-0.0181851	-0.00641925	0.0011073	0.0156846	0.0161485
0.231	-0.00185266	-0.018362	-0.00575408	0.0010143	0.0153681	0.0161069
0.232	-0.00248683	-0.0184494	-0.00520631	0.00054496	0.0151614	0.016002
0.233	-0.0033098	-0.0185369	-0.00494355	-0.000332324	0.0148854	0.0158722
0.234	-0.00424112	-0.0185925	-0.00504112	-0.00146674	0.0143902	0.0157738
0.235	-0.00513163	-0.0184252	-0.00548825	-0.00268386	0.0137183	0.015746
0.236	-0.00583516	-0.0178267	-0.00620696	-0.00384781	0.0130204	0.0158227
0.237	-0.00635664	-0.0167399	-0.0070028	-0.00485908	0.012389	0.0160248
0.238	-0.00677761	-0.0152586	-0.00763639	-0.00567295	0.0118383	0.0163158
0.239	-0.00712311	-0.0135572	-0.007958	-0.00630289	0.011363	0.0166317
0.24	-0.00740859	-0.0118862	-0.00792994	-0.0067515	0.0109428	0.0168836
0.241	-0.00764747	-0.0104615	-0.00763533	-0.00694557	0.010484	0.0170528
0.242	-0.00776637	-0.00934243	-0.00724976	-0.0067689	0.00992336	0.0172361
0.243	-0.00764001	-0.00850844	-0.00695064	-0.00618051	0.00930548	0.017468
0.244	-0.00724508	-0.00797744	-0.0067944	-0.00532371	0.0086171	0.0176698
0.245	-0.00672162	-0.007856	-0.00666621	-0.00443051	0.00782494	0.0177216
0.246	-0.00619944	-0.0082518	-0.00650048	-0.00362411	0.00699902	0.0174716
0.247	-0.00564878	-0.00916908	-0.00643734	-0.00292906	0.00617814	0.0168484
0.248	-0.00499289	-0.0105259	-0.00657224	-0.00239647	0.00539025	0.0160156
0.249	-0.00425723	-0.0121659	-0.0067489	-0.00213996	0.00474892	0.0152553
0.25	-0.00352009	-0.0138889	-0.00675999	-0.00222934	0.00428758	0.0146997
0.251	-0.0028404	-0.0154673	-0.00656526	-0.00255705	0.00389226	0.0143121
0.252	-0.00229447	-0.0166741	-0.00626047	-0.00293016	0.00346571	0.0140224
0.253	-0.00201352	-0.0174107	-0.00598123	-0.00327923	0.00301086	0.0137462
0.254	-0.00214523	-0.0176711	-0.00578059	-0.00369908	0.00255473	0.013447
0.255	-0.00271321	-0.0174176	-0.00558852	-0.00433163	0.00203382	0.0132112
0.256	-0.00355095	-0.016606	-0.00540428	-0.00517586	0.00132809	0.0131224
0.257	-0.00438486	-0.0152031	-0.00530824	-0.00601324	0.000462929	0.0131999
0.258	-0.00494347	-0.0132336	-0.0051895	-0.00665735	-0.000333056	0.0134299
0.259	-0.00508434	-0.0108435	-0.0048361	-0.00715301	-0.000814651	0.0137126
0.26	-0.00490658	-0.00820804	-0.00425632	-0.00755107	-0.000853054	0.0139701
0.261	-0.00460966	-0.00550713	-0.00354283	-0.00775326	-0.000405354	0.0142803
0.262	-0.00427468	-0.00306307	-0.00261703	-0.00772534	0.00049753	0.0147332
0.263	-0.00395768	-0.00122812	-0.00142075	-0.00757673	0.00169778	0.0152064
0.264	-0.00372665	-0.000116935	-0.000145978	-0.00740385	0.00299552	0.0154848
0.265	-0.00351181	0.00037358	0.000898839	-0.00727265	0.00432977	0.0155842
0.266	-0.00316441	0.000429648	0.00150836	-0.00729318	0.00568763	0.0156606
0.267	-0.00267182	0.000167	0.00158834	-0.00755107	0.00690941	0.0157649
0.268	-0.00217278	-0.000421884	0.0011323	-0.00805391	0.00783369	0.0158517
0.269	-0.00174246	-0.00126123	0.000297169	-0.0087389	0.0084745	0.0158159
0.27	-0.00131451	-0.0021541	-0.000681872	-0.00943989	0.00888479	0.0155562
0.271	-0.000785687	-0.00287551	-0.00161544	-0.0100464	0.0090774	0.0150733
0.272	-9.369e-05	-0.00321243	-0.00236139	-0.0106164	0.00915786	0.0145012
0.273	0.000771361	-0.00313247	-0.00286689	-0.0111467	0.00927311	0.0140621
0.274	0.00174919	-0.00279456	-0.00319463	-0.0114476	0.00936844	0.0139401
0.275	0.002696	-0.00236283	-0.00339436	-0.0113426	0.00921584	0.0141566
0.276	0.00350274	-0.00198785	-0.0033427	-0.0108944	0.00873464	0.0145761
0.277	0.00412635	-0.00176925	-0.00290571	-0.0103003	0.00808875	0.0150305
0.278	0.00450981	-0.00165172	-0.0022219	-0.00965436	0.00745054	0.0153486
0.279	0.0046869	-0.0015248	-0.00161713	-0.00903958	0.00692551	0.0153802
0.28	0.00482852	-0.00132282	-0.00131987	-0.00863947	0.00665162	0.0151348
0.281	0.00510094	-0.00101828	-0.00123619	-0.008628	0.00668584	0.0147382
0.282	0.00555024	-0.000606338	-0.00104929	-0.009101	0.00691648	0.014309
0.283	0.00608911	-8.63066e-05	-0.000560825	-0.0100147	0.00724122	0.0139764
0.284	0.0066724	0.000430639	0.000197813	-0.011173	0.00765184	0.0138369
0.285	0.00736732	0.000726088	0.00107101	-0.0123562	0.00813765	0.0138675
0.286	0.00816742	0.000721602	0.00201412	-0.0133429	0.00866788	0.0139732
0.287	0.00900698	0.000559978	0.00314193	-0.0139045	0.00917833	0.0140909
0.288	0.00992594	0.000452887	0.0045051	-0.0139671	0.00954445	0.0141716
0.289	0.0110797	0.000471164	0.0060857	-0.0136091	0.00971461	0.0141075
0.29	0.0126513	0.000505951	0.00785994	-0.0129372	0.00975399	0.0137808
0.291	0.0148004	0.00045568	0.00981436	-0.0121287	0.00971765	0.0132015
0.292	0.017765	0.000341708	0.0121454	-0.0113853	0.00968657	0.0125738
0.293	0.0220616	0.000219857	0.0154252	-0.0108118	0.00986998	0.0121714
0.294	0.0287048	6.46403e-05	0.0207509	-0.0104542	0.0106341	0.0121372
0.295	0.0392596	-0.000122021	0.0299391	-0.0103237	0.0125761	0.0124026
0.296	0.0555183	-0.000134855	0.0453273	-0.0103026	0.0165004	0.0127996
0.297	0.0789907	0.000318991	0.0690083	-0.0101995	0.0231231	0.0133114
0.298	0.1104	0.00135144	0.102009	-0.00991135	0.032725	0.014142
0.299	0.149396	0.00291273	0.143999	-0.00934843	0.0450344	0.0155995
0.3	0.194704	0.00503506	0.193408	-0.0082731	0.0593155	0.0181803
0.301	0.244486	0.00795777	0.247756	-0.00633171	0.0745429	0.0227051
0.302	0.296875	0.0122307	0.304392	-0.00321723	0.0895428	0.0301149
0.303	0.350778	0.0188881	0.361445	0.00125812	0.103156	0.0411364
0.304	0.406624	0.0294887	0.418447	0.00724304	0.114569	0.0559636
0.305	0.466686	0.0459528	0.47649	0.0147846	0.123668	0.07398
0.306	0.534757	0.0700759	0.53814	0.0234972	0.131166	0.0939433
0.307	0.615186	0.102839	0.607078	0.0324577	0.138444	0.11446
0.308	0.711721	0.144068	0.68731	0.0406016	0.147187	0.13419
0.309	0.826793	0.192443	0.782299	0.0470288	0.159101	0.152017
0.31	0.961198	0.245789	0.894349	0.0509959	0.175652	0.167468
0.311	1.11392	0.301845	1.02422	0.0520661	0.197793	0.180929
0.312	1.28216	0.359079	1.17101	0.0503951	0.225905	0.193509
0.313	1.46169	0.417162	1.33226	0.0468062	0.259857	0.206845
0.314	1.64733	0.477289	1.50413	0.0426735	0.298997	0.222703
0.315	1.83342	0.542219	1.68151	0.0396137	0.342243	0.242576
0.316	2.01424	0.61576	1.8583	0.0390852	0.388184	0.267619
0.317	2.18435	0.701854	2.028	0.0422994	0.435123	0.298646
0.318	2.33907	0.803728	2.18444	0.0502484	0.481231	0.336001
0.319	2.47481	0.923216	2.32252	0.0635313	0.524866	0.379402
0.32	2.58925	1.06044	2.43887	0.0822298	0.564935	0.427799
0.321	2.68112	1.21386	2.53215	0.105962	0.601039	0.479536
0.322	2.75	1.38037	2.60262	0.134058	0.633436	0.532648
0.323	2.79598	1.55548	2.65146	0.165754	0.663003	0.585041
0.324	2.8195	1.73346	2.68022	0.200285	0.691168	0.634675
0.325	2.82107	1.90766	2.6901	0.236874	0.7197	0.679871
0.326	2.8008	2.07144	2.68105	0.274578	0.750114	0.719716
0.327	2.75755	2.21928	2.65077	0.312091	0.783015	0.754186
0.328	2.68793	2.34728	2.5936	0.347828	0.817552	0.783855
0.329	2.58586	2.45334	2.50016	0.380239	0.850576	0.809686
0.33	2.44321	2.53715	2.35931	0.408152	0.87623	0.832784
0.331	2.25178	2.59963	2.16171	0.431053	0.887333	0.853966
0.332	2.00623	2.64234	1.90357	0.449063	0.87788	0.873453
0.333	1.7068	2.66699	1.58911	0.462455	0.844875	0.890221
0.334	1.36077	2.67486	1.23064	0.470629	0.788936	0.90094
0.335	0.981592	2.666	0.846425	0.470928	0.713842	0.899779
0.336	0.586494	2.638	0.457157	0.458645	0.62517	0.879888
0.337	0.193566	2.58469	0.0821284	0.428806	0.528699	0.835846
0.338	-0.180833	2.49604	-0.26361	0.378551	0.429356	0.765698
0.339	-0.524198	2.36019	-0.57093	0.308612	0.330588	0.67172
0.34	-0.82935	2.16738	-0.8374	0.223305	0.233887	0.559735
0.341	-1.09488	1.9137	-1.06676	0.129379	0.138779	0.437479
0.342	-1.32414	1.60341	-1.2669	0.0343648	0.0434109	0.312808
0.343	-1.52303	1.24882	-1.44706	-0.0549987	-0.0545215	0.192256
0.344	-1.69769	0.868258	-1.61495	-0.133935	-0.156655	0.08019
0.345	-1.85241	0.482447	-1.77469	-0.200308	-0.262956	-0.0214398
0.346	-1.98844	0.110557	-1.92602	-0.254639	-0.371219	-0.112994
0.347	-2.10389	-0.232597	-2.06483	-0.299581	-0.477257	-0.196712
0.348	-2.19475	-0.538003	-2.18448	-0.339203	-0.575692	-0.275816
0.349	-2.25631	-0.803042	-2.27737	-0.377789	-0.660963	-0.353277
0.35	-2.28434	-1.03103	-2.33656	-0.418305	-0.728221	-0.430656
0.351	-2.27609	-1.22948	-2.35701	-0.461505	-0.774059	-0.507458
0.352	-2.23109	-1.40745	-2.33662	-0.505867	-0.796909	-0.581271
0.353	-2.15151	-1.57273	-2.27637	-0.547944	-0.797011	-0.648379
0.354	-2.04179	-1.72963	-2.17978	-0.583215	-0.776215	-0.704541
0.355	-1.90792	-1.87822	-2.0524	-0.607255	-0.737638	-0.745912
0.356	-1.7568	-2.01476	-1.90138	-0.61652	-0.685216	-0.76984
0.357	-1.59571	-2.13286	-1.73466	-0.608724	-0.623348	-0.775184
0.358	-1.43168	-2.22517	-1.56018	-0.583336	-0.556421	-0.762244
0.359	-1.27097	-2.28502	-1.38529	-0.541775	-0.488366	-0.732655
0.36	-1.11867	-2.30756	-1.21635	-0.486927	-0.422537	-0.689225
0.361	-0.978613	-2.29062	-1.05848	-0.422549	-0.361596	-0.635556
0.362	-0.853435	-2.23483	-0.915377	-0.352723	-0.307307	-0.575564
0.363	-0.74451	-2.1433	-0.789134	-0.28141	-0.260604	-0.513017
0.364	-0.651974	-2.02136	-0.680526	-0.212228	-0.221849	-0.451173
0.365	-0.575144	-1.87597	-0.589447	-0.148206	-0.190874	-0.392656
0.366	-0.512919	-1.71488	-0.515013	-0.0915307	-0.16702	-0.339482
0.367	-0.463828	-1.54579	-0.455553	-0.0435642	-0.149482	-0.293058
0.368	-0.426081	-1.37588	-0.408964	-0.00508902	-0.13749	-0.254123
0.369	-0.397794	-1.2114	-0.373077	0.0235042	-0.130119	-0.222738
0.37	-0.377068	-1.0574	-0.34574	0.0422078	-0.126296	-0.198427
0.371	-0.362029	-0.91759	-0.324908	0.051666	-0.125038	-0.180416
0.372	-0.350965	-0.794334	-0.308783	0.0534073	-0.125531	-0.167729
0.373	-0.342328	-0.688585	-0.295873	0.0495477	-0.127073	-0.159264
0.374	-0.334771	-0.600151	-0.285048	0.0422457	-0.129146	-0.153989
0.375	-0.327267	-0.527948	-0.27544	0.0334455	-0.131411	-0.151057
0.376	-0.319126	-0.470268	-0.266306	0.0247391	-0.133482	-0.149808
0.377	-0.309918	-0.425133	-0.257119	0.0172439	-0.134956	-0.14972
0.378	-0.299346	-0.390417	-0.247691	0.0116942	-0.135617	-0.150235
0.379	-0.287166	-0.363866	-0.23808	0.00850223	-0.135402	-0.150804
0.38	-0.273257	-0.343387	-0.228352	0.00766563	-0.134318	-0.151111
0.381	-0.257622	-0.327226	-0.218518	0.00891463	-0.13242	-0.151023
0.382	-0.240459	-0.313869	-0.208641	0.0119137	-0.12983	-0.150418
0.383	-0.222405	-0.302139	-0.198828	0.0161938	-0.126736	-0.149269
0.384	-0.20452	-0.291318	-0.189129	0.0211778	-0.123297	-0.147716
0.385	-0.187935	-0.281062	-0.179566	0.0263743	-0.119674	-0.145863
0.386	-0.173531	-0.271225	-0.170258	0.0315313	-0.116094	-0.143664
0.387	-0.161893	-0.26163	-0.161471	0.0366443	-0.112705	-0.141082
0.388	-0.153291	-0.251998	-0.153483	0.041827	-0.109557	-0.138342
0.389	-0.147548	-0.242148	-0.146372	0.0471398	-0.106678	-0.135821
0.39	-0.144137	-0.23209	-0.140021	0.0524961	-0.104071	-0.133628
0.391	-0.142344	-0.221989	-0.134376	0.0577973	-0.101745	-0.13159
0.392	-0.141388	-0.212073	-0.12955	0.0630344	-0.0997456	-0.129595
0.393	-0.140619	-0.202454	-0.125584	0.0681893	-0.0981099	-0.12767
0.394	-0.139677	-0.193141	-0.122296	0.0731774	-0.0968067	-0.12584
0.395	-0.138462	-0.184216	-0.119429	0.0779156	-0.0957604	-0.124069
0.396	-0.137024	-0.175863	-0.116826	0.0824388	-0.0948648	-0.122314
0.397	-0.135485	-0.168237	-0.114456	0.086937	-0.0939939	-0.120556
0.398	-0.133891	-0.161427	-0.112327	0.0915285	-0.0930273	-0.118808
0.399	-0.132177	-0.155448	-0.110432	0.0960244	-0.0918881	-0.1171
0.4	-0.1304	-0.150175	-0.108715	0.100089	-0.0906223	-0.115474
0.401	-0.128727	-0.145326	-0.10706	0.103536	-0.089271	-0.113888
0.402	-0.127196	-0.14065	-0.105411	0.106452	-0.0877365	-0.112152
0.403	-0.125719	-0.136029	-0.10383	0.109086	-0.0859459	-0.110126
0.404	-0.124221	-0.131489	-0.102373	0.111665	-0.0839439	-0.107922
0.405	-0.12274	-0.127213	-0.101082	0.114383	-0.0818549	-0.105776
0.406	-0.121435	-0.123395	-0.100031	0.117492	-0.0798792	-0.103836
0.407	-0.120349	-0.120119	-0.0992803	0.121268	-0.0781871	-0.102097
0.408	-0.119298	-0.117323	-0.0987875	0.125764	-0.0768038	-0.100476
0.409	-0.1182	-0.114774	-0.098405	0.130673	-0.0756556	-0.0989489
0.41	-0.117165	-0.112242	-0.0979444	0.135596	-0.0746797	-0.0975912
0.411	-0.116204	-0.109692	-0.0972494	0.140304	-0.0738532	-0.0964516
0.412	-0.115161	-0.107233	-0.0963027	0.144743	-0.0731593	-0.0954055
0.413	-0.113839	-0.104993	-0.0952288	0.14885	-0.0725466	-0.094247
0.414	-0.111989	-0.103086	-0.0941136	0.152451	-0.0718692	-0.0929193
0.415	-0.109261	-0.101604	-0.0929385	0.155498	-0.070904	-0.0915163
0.416	-0.105347	-0.100604	-0.0917397	0.1582	-0.0695345	-0.0901267
0.417	-0.100235	-0.100094	-0.090682	0.160766	-0.0678402	-0.0887655
0.418	-0.0942793	-0.0999386	-0.0898883	0.163304	-0.065906	-0.0873981
0.419	-0.0879868	-0.0998313	-0.0893365	0.165867	-0.0637471	-0.0860202
0.42	-0.0817632	-0.0994283	-0.0888953	0.16842	-0.0614926	-0.0846704
0.421	-0.075948	-0.0984703	-0.0883721	0.170855	-0.059339	-0.0833117
0.422	-0.0708832	-0.0968981	-0.0876471	0.173109	-0.057335	-0.081791
0.423	-0.0668777	-0.0948546	-0.0867925	0.175255	-0.0554405	-0.0799732
0.424	-0.0642673	-0.0925489	-0.0859731	0.177396	-0.0536411	-0.0778869
0.425	-0.0633286	-0.0901554	-0.0852277	0.179603	-0.0519691	-0.0757651
0.426	-0.064042	-0.0878045	-0.0844219	0.181937	-0.0505447	-0.0738705
0.427	-0.0660692	-0.0856033	-0.0833745	0.184362	-0.0494312	-0.072297
0.428	-0.0689989	-0.0836804	-0.0819757	0.186734	-0.0484767	-0.0710511
0.429	-0.0724962	-0.0821886	-0.0802875	0.188871	-0.047453	-0.0701983
0.43	-0.0761629	-0.0812191	-0.0785318	0.190639	-0.0462389	-0.0697883
0.431	-0.0795424	-0.0807614	-0.07681	0.192035	-0.0448161	-0.0696645
0.432	-0.0823375	-0.0807219	-0.0749604	0.193096	-0.0432323	-0.0694715
0.433	-0.0844667	-0.0808846	-0.072898	0.19378	-0.0415788	-0.0689233
0.434	-0.0859529	-0.0809523	-0.0708238	0.194063	-0.0399371	-0.0679836
0.435	-0.0867683	-0.0807742	-0.0689093	0.194119	-0.0383427	-0.0667521
0.436	-0.086796	-0.080433	-0.0671024	0.194228	-0.0367454	-0.0653201
0.437	-0.0860017	-0.0800875	-0.0653401	0.194554	-0.035082	-0.0637705
0.438	-0.0846443	-0.0798641	-0.0636938	0.195145	-0.0333887	-0.0621734
0.439	-0.0831348	-0.0798296	-0.0622905	0.196107	-0.0317279	-0.0605395
0.44	-0.0815852	-0.0799471	-0.0612456	0.197554	-0.0301189	-0.0588101
0.441	-0.0797602	-0.0800703	-0.060659	0.199444	-0.0285876	-0.0569074
0.442	-0.077496	-0.0800328	-0.060488	0.201659	-0.0272209	-0.0548425
0.443	-0.0748837	-0.0797354	-0.0604914	0.20417	-0.0261518	-0.0527613
0.444	-0.0721566	-0.0791488	-0.0604398	0.206949	-0.0254102	-0.0508289
0.445	-0.0695878	-0.078284	-0.0602347	0.209844	-0.024767	-0.0491652
0.446	-0.0674051	-0.0771493	-0.0598488	0.21262	-0.0239138	-0.0478806
0.447	-0.065817	-0.0757377	-0.0592717	0.215064	-0.0228193	-0.0469609
0.448	-0.0649758	-0.0740602	-0.0584851	0.217093	-0.0217097	-0.0461344
0.449	-0.0648078	-0.0721607	-0.0574927	0.218785	-0.0207476	-0.0450378
0.45	-0.0650426	-0.0701324	-0.0563285	0.220244	-0.0198669	-0.043514
0.451	-0.0653994	-0.0680676	-0.0550056	0.221489	-0.0189165	-0.0416644
0.452	-0.0657113	-0.0659866	-0.0535017	0.222524	-0.0178436	-0.0396483
0.453	-0.0658365	-0.0639286	-0.0518199	0.223353	-0.0166504	-0.0375901
0.454	-0.0655522	-0.061974	-0.0500986	0.223997	-0.0153563	-0.0356907
0.455	-0.0646576	-0.0600823	-0.0485676	0.224538	-0.0140445	-0.0341829
0.456	-0.0630785	-0.0580754	-0.0473553	0.225032	-0.0128255	-0.0331765
0.457	-0.0609785	-0.0557914	-0.0464669	0.225505	-0.0117369	-0.0326746
0.458	-0.0588365	-0.0531827	-0.0459047	0.226061	-0.0107139	-0.0325891
0.459	-0.0572211	-0.0503505	-0.045705	0.226788	-0.00973346	-0.032701
0.46	-0.0564754	-0.0475957	-0.0458949	0.227647	-0.00886656	-0.032787
0.461	-0.0566226	-0.0453276	-0.0464761	0.228577	-0.00817064	-0.0327852
0.462	-0.0574297	-0.0437805	-0.0473352	0.229607	-0.00769147	-0.032704
0.463	-0.0586058	-0.0428848	-0.0482697	0.230758	-0.00746485	-0.0324533
0.464	-0.0600153	-0.0424108	-0.0492027	0.231915	-0.00741087	-0.031955
0.465	-0.0616251	-0.0422239	-0.0501014	0.232987	-0.00736532	-0.0313415
0.466	-0.0633275	-0.0423471	-0.0508362	0.233988	-0.00726289	-0.030857
0.467	-0.0650132	-0.0427444	-0.0512509	0.23483	-0.00710473	-0.0305848
0.468	-0.0666686	-0.0432582	-0.0512404	0.235409	-0.00684722	-0.0303253
0.469	-0.068252	-0.0437659	-0.0508434	0.235798	-0.00650501	-0.0298067
0.47	-0.0696441	-0.0441951	-0.0502193	0.236094	-0.00620861	-0.0290606
0.471	-0.0706715	-0.044445	-0.04952	0.236265	-0.00611307	-0.0283734
0.472	-0.0710939	-0.0444694	-0.0488308	0.236286	-0.00629451	-0.027898
0.473	-0.0707258	-0.0443879	-0.0481598	0.236324	-0.00670018	-0.0275654
0.474	-0.0696021	-0.0443652	-0.0475024	0.23668	-0.00720332	-0.0272496
0.475	-0.0679654	-0.0444375	-0.0469248	0.237518	-0.0077486	-0.0269073
0.476	-0.0661588	-0.0445464	-0.0465941	0.238738	-0.00835471	-0.0266229
0.477	-0.064485	-0.0446537	-0.0467288	0.240078	-0.00892442	-0.026514
0.478	-0.0630523	-0.0447587	-0.0473534	0.24129	-0.00927956	-0.0266033
0.479	-0.0618229	-0.0448629	-0.0482157	0.242213	-0.00939769	-0.0268118
0.48	-0.0608147	-0.0450014	-0.0491223	0.24273	-0.00939578	-0.0270761
0.481	-0.0600826	-0.0452665	-0.0500797	0.24287	-0.00938183	-0.0274266
0.482	-0.0595912	-0.045695	-0.0510624	0.242801	-0.00941155	-0.0278856
0.483	-0.0592784	-0.0462303	-0.0519569	0.242638	-0.00948586	-0.0283694
0.484	-0.0591682	-0.0467602	-0.0526974	0.242437	-0.00957905	-0.0287636
0.485	-0.0593336	-0.0471061	-0.0532823	0.242313	-0.00964321	-0.0290103
0.486	-0.0597798	-0.047179	-0.0537217	0.242387	-0.00967002	-0.0291149
0.487	-0.060491	-0.0470919	-0.0540009	0.242693	-0.00979979	-0.0291414
0.488	-0.0614359	-0.0469951	-0.0541197	0.243156	-0.0101567	-0.0291523
0.489	-0.062456	-0.0469648	-0.0541561	0.24361	-0.0106795	-0.0291087
0.49	-0.0633519	-0.0470111	-0.0542246	0.243877	-0.0112971	-0.0289429
0.491	-0.0639987	-0.0470355	-0.0543395	0.243904	-0.0120261	-0.0287131
0.492	-0.0643523	-0.0469144	-0.0543482	0.243805	-0.0128543	-0.0285566
0.493	-0.0644241	-0.0466855	-0.0541689	0.24373	-0.0136985	-0.0285511
0.494	-0.0642825	-0.0464773	-0.0539387	0.24376	-0.0144888	-0.028692
0.495	-0.0640881	-0.0463751	-0.0538575	0.243951	-0.0152252	-0.0289685
0.496	-0.0640008	-0.0464345	-0.0540576	0.244349	-0.0158903	-0.0293836
0.497	-0.0640711	-0.046636	-0.0544414	0.244877	-0.01641	-0.0298882
0.498	-0.0642587	-0.0469306	-0.0547386	0.24526	-0.0167414	-0.030403
0.499	-0.0645073	-0.0474207	-0.0547955	0.24524	-0.0169532	-0.0308615
0.5	-0.0648134	-0.048278	-0.0545428	0.244816	-0.0171929	-0.0312583
0.501	-0.0651199	-0.0494987	-0.0538916	0.244149	-0.0175258	-0.0317153
0.502	-0.0652746	-0.0509001	-0.0528044	0.243364	-0.017889	-0.0322971
0.503	-0.0652689	-0.0522062	-0.051323	0.242577	-0.0182513	-0.0329081
0.504	-0.0652011	-0.0531015	-0.0495903	0.24202	-0.0187021	-0.0334866
0.505	-0.0649785	-0.0533567	-0.0478082	0.241964	-0.0193701	-0.0340426
0.506	-0.0644005	-0.0529448	-0.0461247	0.24246	-0.0202754	-0.0345567
0.507	-0.0634216	-0.0520693	-0.0446515	0.243327	-0.0212242	-0.0349347
0.508	-0.062065	-0.0510354	-0.0435464	0.24431	-0.0219304	-0.0350624
0.509	-0.060296	-0.0500511	-0.0429578	0.245118	-0.0222436	-0.0349391
0.51	-0.0581855	-0.0491767	-0.0428164	0.245514	-0.0221956	-0.034679
0.511	-0.0559103	-0.0484052	-0.0428254	0.245431	-0.0219125	-0.0344002
0.512	-0.0535805	-0.0477372	-0.0427434	0.244897	-0.0215142	-0.0342116
0.513	-0.051316	-0.047204	-0.0424748	0.243993	-0.0210598	-0.0342225
0.514	-0.0493462	-0.0468384	-0.0419778	0.242891	-0.0205879	-0.0344787
0.515	-0.0478914	-0.0466514	-0.0412209	0.241779	-0.0201727	-0.034921
0.516	-0.0470699	-0.0466143	-0.0400885	0.240853	-0.0198078	-0.0354275
0.517	-0.0469192	-0.0466369	-0.0384556	0.240395	-0.0193808	-0.0358758
0.518	-0.0473056	-0.0466037	-0.0364608	0.240745	-0.0188943	-0.0361503
0.519	-0.0479033	-0.0463914	-0.0345276	0.24232	-0.0184429	-0.0361587
0.52	-0.048382	-0.0458343	-0.0330396	0.245661	-0.0180014	-0.0358872
0.521	-0.0485082	-0.0448369	-0.0320095	0.251118	-0.0174288	-0.0354209
0.522	-0.0481948	-0.0435531	-0.03114	0.258653	-0.0166514	-0.0348972
0.523	-0.0475211	-0.042214	-0.0302312	0.267986	-0.0157568	-0.0343945
0.524	-0.046612	-0.0408114	-0.0293616	0.278554	-0.014928	-0.0338562
0.525	-0.0455904	-0.0391864	-0.0287062	0.289647	-0.0143316	-0.0331366
0.526	-0.0445383	-0.037322	-0.0283442	0.300691	-0.0140019	-0.0321033
0.527	-0.0433988	-0.0353955	-0.0281539	0.310969	-0.0138625	-0.0307298
0.528	-0.0421132	-0.0336686	-0.0279077	0.319403	-0.0138169	-0.0291279
0.529	-0.0407478	-0.0323418	-0.0276121	0.325067	-0.0137395	-0.0275025
0.53	-0.0393767	-0.0313952	-0.0275169	0.327507	-0.0134736	-0.0260808
0.531	-0.0380496	-0.0306338	-0.0277117	0.326508	-0.0129488	-0.0250117
0.532	-0.0368733	-0.0298949	-0.0280158	0.322185	-0.0122635	-0.0242406
0.533	-0.0359852	-0.029154	-0.0282338	0.315235	-0.0115887	-0.0235577
0.534	-0.0354367	-0.0285041	-0.0283016	0.306659	-0.0110186	-0.0228144
0.535	-0.0351334	-0.0280344	-0.0281816	0.297345	-0.0104878	-0.0220273
0.536	-0.0349399	-0.0276683	-0.0277526	0.28803	-0.00986534	-0.0213254
0.537	-0.0348441	-0.0271675	-0.0269204	0.279353	-0.00909347	-0.0208375
0.538	-0.0348801	-0.0263426	-0.0257051	0.271776	-0.00814995	-0.0205814
0.539	-0.0349112	-0.0252001	-0.0241785	0.265596	-0.00704952	-0.0204377
0.54	-0.0347165	-0.0238495	-0.022471	0.261067	-0.00592422	-0.0202021
0.541	-0.0342396	-0.0223865	-0.0207382	0.258309	-0.00488481	-0.0197245
0.542	-0.0335843	-0.0209367	-0.0190879	0.257202	-0.00389939	-0.0190499
0.543	-0.0328858	-0.0196506	-0.0176305	0.257661	-0.00298869	-0.0183296
0.544	-0.0322749	-0.0186196	-0.016499	0.259995	-0.00230771	-0.0176187
0.545	-0.0318531	-0.0178599	-0.0157833	0.264731	-0.00192004	-0.0168769
0.546	-0.0316366	-0.0173352	-0.0154919	0.272168	-0.00175884	-0.0160821
0.547	-0.0315633	-0.0169992	-0.0155198	0.282171	-0.00180604	-0.0152628
0.548	-0.031542	-0.0167987	-0.0156824	0.294066	-0.002093	-0.0144858
0.549	-0.0314622	-0.0166621	-0.015904	0.306669	-0.00254944	-0.0138141
0.55	-0.0311826	-0.0165165	-0.0162826	0.318547	-0.00296791	-0.0132712
0.551	-0.030643	-0.0163459	-0.0168956	0.328361	-0.00319286	-0.0128687
0.552	-0.0299807	-0.0161826	-0.017698	0.335179	-0.0032399	-0.0126511
0.553	-0.0293745	-0.0159837	-0.0185626	0.338577	-0.00313657	-0.012626
0.554	-0.0288669	-0.0156657	-0.0192934	0.338518	-0.00282046	-0.0126168
0.555	-0.0283906	-0.0152222	-0.0197358	0.335207	-0.00225749	-0.0123543
0.556	-0.027861	-0.0147658	-0.0198581	0.329041	-0.00157551	-0.0117353
0.557	-0.0272489	-0.01452	-0.0196137	0.320704	-0.00104796	-0.0108782
0.558	-0.0265937	-0.0146808	-0.0189258	0.311273	-0.000907726	-0.00994595
0.559	-0.0259669	-0.0152791	-0.0179215	0.301879	-0.0011707	-0.00901999
0.56	-0.0253986	-0.0162068	-0.0169302	0.29323	-0.00161134	-0.00814219
0.561	-0.0248883	-0.0172852	-0.016152	0.285632	-0.00190197	-0.00730805
0.562	-0.0244689	-0.0183221	-0.0155165	0.279265	-0.00185954	-0.00644003
0.563	-0.0241408	-0.0191895	-0.0148452	0.274315	-0.00151748	-0.00550678
0.564	-0.0237999	-0.0198108	-0.0140081	0.2709	-0.000934497	-0.00458853
0.565	-0.0233524	-0.0201199	-0.0129777	0.26896	-0.000106594	-0.00378784
0.566	-0.0228615	-0.0201053	-0.0117859	0.268337	0.00094199	-0.00313245
0.567	-0.0224228	-0.0199416	-0.0104655	0.268804	0.00210738	-0.00259213
0.568	-0.0219754	-0.0199375	-0.00907474	0.270129	0.00320661	-0.00217366
0.569	-0.0214471	-0.0201952	-0.00770469	0.272166	0.00410363	-0.00184068
0.57	-0.0209369	-0.0205692	-0.0064402	0.274698	0.00485433	-0.00142606
0.571	-0.0205919	-0.0208911	-0.00533781	0.277245	0.00554247	-0.000857791
0.572	-0.020476	-0.0210746	-0.00449408	0.279357	0.00608693	-0.000312366
0.573	-0.0205766	-0.0211842	-0.00406324	0.281081	0.00638854	3.36056e-06
0.574	-0.0208407	-0.0213466	-0.00409644	0.282839	0.00646827	5.83503e-05
0.575	-0.0212119	-0.0215518	-0.00447266	0.284979	0.00640226	-4.51197e-05
0.576	-0.0215782	-0.0216733	-0.00498395	0.287568	0.00630388	-0.000136567
0.577	-0.0218018	-0.0216077	-0.00544897	0.290349	0.0063361	-9.15535e-05
0.578	-0.0218495	-0.0213492	-0.00575562	0.292913	0.00664481	5.17739e-05
0.579	-0.0217963	-0.0210003	-0.00584742	0.295096	0.00727061	0.000263927
0.58	-0.0216895	-0.0206102	-0.00573222	0.297073	0.0080966	0.000629477
0.581	-0.0214607	-0.0201012	-0.00539308	0.298882	0.00892584	0.00118273
0.582	-0.0211211	-0.0194971	-0.00475197	0.300152	0.00964866	0.00184474
0.583	-0.0208728	-0.0189847	-0.00381186	0.300452	0.0102744	0.0024881
0.584	-0.0208429	-0.0186632	-0.00270658	0.299613	0.0108178	0.0029957
0.585	-0.0209667	-0.0184156	-0.00160691	0.297674	0.0112481	0.00333762
0.586	-0.0211826	-0.0180868	-0.000606335	0.294723	0.0115507	0.00357508
0.587	-0.0214699	-0.0176757	0.000283592	0.290835	0.0117426	0.0038268
0.588	-0.0216794	-0.0172502	0.00102884	0.286115	0.0118177	0.00426262
0.589	-0.0215566	-0.0167623	0.00160614	0.280718	0.0117902	0.00496385
0.59	-0.0209878	-0.0161878	0.00199759	0.274892	0.0117525	0.00586632
0.591	-0.0201887	-0.0157271	0.00208413	0.269057	0.0117596	0.00686201
0.592	-0.0195528	-0.0155743	0.00173071	0.263729	0.0117274	0.00781347
0.593	-0.0192046	-0.0156694	0.000910831	0.25937	0.0115214	0.00861302
0.594	-0.0189397	-0.0158598	-0.000233871	0.256267	0.0110981	0.00922745
0.595	-0.0186145	-0.0160656	-0.0014728	0.254396	0.0105547	0.00964611
0.596	-0.018283	-0.0162115	-0.00267136	0.253432	0.0100825	0.00989848
0.597	-0.0180192	-0.0162511	-0.00373191	0.252946	0.00980315	0.00997617
0.598	-0.0177857	-0.0162876	-0.00447835	0.252616	0.00965835	0.00981158
0.599	-0.0174716	-0.0165121	-0.00474603	0.25229	0.00956178	0.00949011
0.6	-0.0170693	-0.0169587	-0.00451304	0.251969	0.00954445	0.00921134
0.601	-0.016703	-0.0174208	-0.00403263	0.251752	0.00962735	0.00910062
0.602	-0.0164573	-0.017709	-0.00372031	0.251716	0.00972499	0.00916766
0.603	-0.0163812	-0.0178134	-0.00370792	0.251864	0.0098024	0.00933672
0.604	-0.0165464	-0.0177472	-0.003815	0.252216	0.00990098	0.00959781
0.605	-0.0169397	-0.0174719	-0.00395281	0.252867	0.0100192	0.00996779
0.606	-0.0174922	-0.0170273	-0.00417016	0.253893	0.0101027	0.0102773
0.607	-0.0181588	-0.0165639	-0.00452526	0.255181	0.0100923	0.0103227
0.608	-0.0188662	-0.0162376	-0.00509983	0.256456	0.0100173	0.0101226
0.609	-0.0196014	-0.0161243	-0.00593873	0.257521	0.00996272	0.00981686
0.61	-0.0204734	-0.0161644	-0.00702185	0.258286	0.00995401	0.00952705
0.611	-0.0214978	-0.0162307	-0.00824351	0.258671	0.00999124	0.00931877
0.612	-0.02248	-0.0162505	-0.00937128	0.258722	0.0100933	0.00917278
0.613	-0.0231883	-0.0162205	-0.0101904	0.258735	0.0102	0.0090221
0.614	-0.0235719	-0.0162089	-0.0105983	0.259113	0.0101618	0.00877987
0.615	-0.0237492	-0.0163203	-0.010612	0.260001	0.00995646	0.00844365
0.616	-0.0237997	-0.0165355	-0.01036	0.261115	0.0097582	0.00814339
0.617	-0.0236854	-0.0167073	-0.0099707	0.262064	0.00972614	0.00795773
0.618	-0.0233484	-0.0168182	-0.00955478	0.26261	0.00983834	0.0078509
0.619	-0.0228067	-0.0170161	-0.00921387	0.26262	0.00994295	0.00781049
0.62	-0.0221174	-0.0173706	-0.00897768	0.261986	0.00992823	0.00786251
0.621	-0.0212618	-0.0177971	-0.00879432	0.260639	0.0098213	0.00794803
0.622	-0.0202207	-0.0181203	-0.00862592	0.25862	0.00970688	0.00796646
0.623	-0.0191103	-0.01815	-0.0085539	0.256053	0.00965217	0.00796149
0.624	-0.0181496	-0.0177868	-0.00866566	0.253088	0.00973047	0.00809625
0.625	-0.0175124	-0.0171243	-0.00892124	0.249847	0.00996101	0.00846511
0.626	-0.0172256	-0.0164082	-0.00923347	0.246343	0.0101879	0.00897111
0.627	-0.0172443	-0.0158005	-0.00955217	0.242567	0.0101719	0.00934414
0.628	-0.0174589	-0.0153647	-0.0099236	0.238795	0.0099003	0.0093796
0.629	-0.0177167	-0.0152285	-0.010401	0.235684	0.00956196	0.00913146
0.63	-0.0180318	-0.0154412	-0.0108801	0.234031	0.00925213	0.00877211
0.631	-0.0185002	-0.015822	-0.0112316	0.2344	0.00893991	0.0083612
0.632	-0.0190748	-0.0161065	-0.0114657	0.236782	0.00859056	0.00785096
0.633	-0.0196107	-0.0160904	-0.01165	0.240604	0.00822086	0.00726335
0.634	-0.0199756	-0.0156873	-0.0117158	0.245062	0.00785475	0.00673379
0.635	-0.0201691	-0.0149349	-0.0114969	0.249421	0.00749082	0.00641632
0.636	-0.0203571	-0.0139548	-0.0109929	0.253182	0.00713276	0.00641229
0.637	-0.0206947	-0.0129463	-0.0103715	0.256134	0.00681589	0.00674824
0.638	-0.0211993	-0.0120832	-0.00979681	0.258245	0.00661251	0.00734036
0.639	-0.0218017	-0.0113736	-0.0093814	0.259477	0.00657633	0.0079592
0.64	-0.0224047	-0.0107215	-0.00913649	0.259687	0.00670315	0.00839088
0.641	-0.0229056	-0.0101311	-0.0089806	0.258653	0.00699907	0.0085811
0.642	-0.0232076	-0.00976157	-0.0088509	0.256221	0.00751521	0.00861037
0.643	-0.0232311	-0.00976118	-0.00866174	0.252462	0.00822973	0.00870868
0.644	-0.0229558	-0.0101296	-0.00830982	0.247637	0.00901754	0.00906433
0.645	-0.022484	-0.010764	-0.00785148	0.242032	0.00978397	0.009598
0.646	-0.0220001	-0.0115741	-0.00748198	0.235974	0.0104637	0.0101019
0.647	-0.021626	-0.0125429	-0.00730181	0.229902	0.0109331	0.0104466
0.648	-0.0213982	-0.0137322	-0.00717695	0.224199	0.0110477	0.010636
0.649	-0.021344	-0.0151509	-0.00687274	0.219055	0.0107353	0.0107217
0.65	-0.0214224	-0.0166103	-0.00633251	0.214505	0.0100518	0.0107101
0.651	-0.0214739	-0.0178161	-0.00574765	0.210541	0.00917773	0.0105736
0.652	-0.0214713	-0.018551	-0.00533188	0.207201	0.00831415	0.0103176
0.653	-0.0216069	-0.018713	-0.00517838	0.204463	0.0075719	0.0100222
0.654	-0.0219318	-0.0183654	-0.00533816	0.202158	0.00702927	0.0097609
0.655	-0.0222221	-0.0177773	-0.00577027	0.200165	0.00681696	0.00955931
0.656	-0.0222572	-0.0172194	-0.00630284	0.198551	0.00700555	0.00948315
0.657	-0.0219937	-0.0167779	-0.00682588	0.197479	0.00749661	0.00958914
0.658	-0.0214291	-0.0164085	-0.00732174	0.197072	0.00813764	0.00979923
0.659	-0.0205271	-0.0161196	-0.00772519	0.197434	0.00883456	0.00998284
0.66	-0.0193791	-0.0160297	-0.00793447	0.198637	0.00949885	0.0101289
0.661	-0.0181895	-0.016177	-0.00793154	0.200615	0.0100687	0.0103069
0.662	-0.0170597	-0.0164469	-0.00782406	0.203183	0.0105847	0.0105272
0.663	-0.0159989	-0.0167224	-0.00770439	0.206055	0.0111115	0.0107768
0.664	-0.015105	-0.0169229	-0.00756699	0.208834	0.0116812	0.0110541
0.665	-0.0145351	-0.0169372	-0.0074145	0.211159	0.0122621	0.0113109
0.666	-0.0143242	-0.0166866	-0.00729082	0.21287	0.012708	0.0114817
0.667	-0.0143586	-0.0162225	-0.0072072	0.214047	0.0128678	0.0114689
0.668	-0.0145551	-0.0156228	-0.00707019	0.214858	0.0127106	0.0111719
0.669	-0.0149094	-0.0148503	-0.0067555	0.215423	0.0123071	0.0106193
0.67	-0.0153714	-0.0137751	-0.00629102	0.215901	0.0118111	0.00991044
0.671	-0.0159334	-0.0122462	-0.00583702	0.21649	0.0113582	0.00912093
0.672	-0.0166091	-0.0102096	-0.0055654	0.217238	0.0108996	0.00833865
0.673	-0.0172457	-0.00782609	-0.00561212	0.217991	0.0103098	0.00767182
0.674	-0.0177227	-0.00544572	-0.00600184	0.218562	0.00960539	0.00720376
0.675	-0.0180826	-0.00341658	-0.0066444	0.218827	0.00898549	0.00694071
0.676	-0.0183627	-0.00188666	-0.00738747	0.218727	0.00868467	0.00682755
0.677	-0.0185835	-0.000869654	-0.00803799	0.218253	0.00881384	0.00682473
0.678	-0.0187514	-0.000327286	-0.0084168	0.217369	0.00935997	0.00695918
0.679	-0.0187917	-5.85618e-05	-0.0083641	0.216082	0.0101956	0.00729745
0.68	-0.0186405	0.000258727	-0.00780625	0.214553	0.0111391	0.00783594
0.681	-0.0183631	0.000833808	-0.00690695	0.212848	0.0120574	0.00850741
0.682	-0.0180805	0.001645	-0.00600477	0.210828	0.0128471	0.00925737
0.683	-0.0178238	0.00253045	-0.0053824	0.208394	0.0133967	0.00995501
0.684	-0.0175307	0.00335134	-0.00512266	0.205621	0.0136039	0.0104182
0.685	-0.0171576	0.00410472	-0.00512705	0.202589	0.0134666	0.0105599
0.686	-0.0167192	0.00489509	-0.00518195	0.199233	0.0131181	0.0104033
0.687	-0.0162608	0.00575106	-0.00503268	0.19546	0.0126772	0.0100895
0.688	-0.0158419	0.00651517	-0.00460794	0.191361	0.0121817	0.00982179
0.689	-0.0154691	0.00698753	-0.00407924	0.18722	0.0117036	0.00974891
0.69	-0.0150597	0.00711972	-0.0035678	0.183264	0.0113272	0.00995866
0.691	-0.0145841	0.00696196	-0.00308487	0.179501	0.0110921	0.0104806
0.692	-0.0141609	0.00649882	-0.00268442	0.175894	0.0111167	0.0112099
0.693	-0.013904	0.00574444	-0.00243393	0.17251	0.0114652	0.0119389
0.694	-0.0138429	0.0048591	-0.0023586	0.169402	0.0118987	0.01254
0.695	-0.0139903	0.00390717	-0.00245736	0.166534	0.0121465	0.01303
0.696	-0.0143363	0.00267336	-0.00272604	0.163843	0.0122169	0.0134437
0.697	-0.014874	0.00091402	-0.00310374	0.161244	0.0122326	0.0137669
0.698	-0.0155799	-0.00130024	-0.00346076	0.158672	0.0122364	0.0139932
0.699	-0.016373	-0.00361612	-0.00376323	0.156169	0.0122007	0.0141232
0.7	-0.0172575	-0.0057524	-0.00410052	0.153867	0.0121171	0.0141525
0.701	-0.0182583	-0.0076412	-0.00450769	0.151883	0.012034	0.0140695
0.702	-0.0191945	-0.00921383	-0.00495129	0.150214	0.0119971	0.0138148
0.703	-0.0198352	-0.0103291	-0.0054574	0.14877	0.0120367	0.0133492
0.704	-0.0201488	-0.0109588	-0.00608251	0.147497	0.0121983	0.0127535
0.705	-0.0202664	-0.0112052	-0.00678553	0.146337	0.0125153	0.0122352
0.706	-0.0203106	-0.0111945	-0.00745872	0.145213	0.0129662	0.0120539
0.707	-0.020256	-0.011062	-0.00801839	0.144161	0.013463	0.0123472
0.708	-0.0199596	-0.0108882	-0.00842603	0.143203	0.013897	0.012977
0.709	-0.0193739	-0.010681	-0.00867959	0.142209	0.0142307	0.0136624
0.71	-0.0185961	-0.0104504	-0.00874486	0.141124	0.0144834	0.0142859
0.711	-0.0176998	-0.0102397	-0.00859427	0.140091	0.0146702	0.0148674
0.712	-0.0167647	-0.0101517	-0.0083159	0.139215	0.0148482	0.015347
0.713	-0.015967	-0.0103115	-0.00800613	0.138348	0.0150743	0.0156215
0.714	-0.0154338	-0.0107264	-0.00766121	0.137305	0.0152968	0.0156499
0.715	-0.0151724	-0.0112529	-0.00729187	0.136104	0.0154504	0.015443
0.716	-0.0151637	-0.0117726	-0.00693413	0.134762	0.0155503	0.0150319
0.717	-0.0153745	-0.012252	-0.00658437	0.133222	0.0155728	0.0144887
0.718	-0.0157159	-0.0126825	-0.00625875	0.131597	0.0154004	0.0138932
0.719	-0.0160817	-0.0131297	-0.00590002	0.130078	0.0150196	0.013246
0.72	-0.0164002	-0.0136715	-0.00536498	0.128696	0.0146188	0.0125546
0.721	-0.0165729	-0.0142759	-0.00468004	0.12735	0.0143139	0.0118892
0.722	-0.0164745	-0.0148297	-0.00407998	0.12593	0.0139872	0.0112734
0.723	-0.0160699	-0.0152001	-0.00377339	0.124349	0.0135423	0.0107125
0.724	-0.0154241	-0.0153104	-0.00383512	0.122589	0.0130982	0.0102924
0.725	-0.0147005	-0.0151819	-0.00429086	0.120765	0.0128427	0.0100977
0.726	-0.01415	-0.0148944	-0.00501673	0.119038	0.0128046	0.0101178
0.727	-0.0139323	-0.0146031	-0.00567945	0.11743	0.0128971	0.0102883
0.728	-0.0140078	-0.0144905	-0.00606529	0.115836	0.0131353	0.0105359
0.729	-0.0142328	-0.0145877	-0.00619966	0.114259	0.0135502	0.0108276
0.73	-0.014487	-0.0148032	-0.00613796	0.112921	0.0140399	0.0111662
0.731	-0.0147557	-0.01506	-0.00588213	0.112103	0.0145103	0.0115135
0.732	-0.0150931	-0.0152762	-0.00536562	0.112021	0.0149029	0.0117954
0.733	-0.0154813	-0.01539	-0.00458536	0.112727	0.015166	0.0119858
0.734	-0.0158617	-0.0154278	-0.00377058	0.114141	0.0153867	0.0121455
0.735	-0.0162472	-0.0154833	-0.00320341	0.116223	0.0157006	0.0123253
0.736	-0.0166792	-0.015702	-0.00304328	0.118934	0.016064	0.0124387
0.737	-0.017156	-0.0162012	-0.00334601	0.12208	0.0163611	0.0123164
0.738	-0.0175084	-0.0169381	-0.00402758	0.125368	0.016569	0.0119587
0.739	-0.0174002	-0.017793	-0.00486197	0.128571	0.0166646	0.0116011
0.74	-0.0166984	-0.0187256	-0.00556343	0.131587	0.0165781	0.0114512
0.741	-0.0156319	-0.0196897	-0.00590774	0.134444	0.0163471	0.011547
0.742	-0.0145033	-0.0205381	-0.0058896	0.137206	0.0161381	0.0117809
0.743	-0.0135229	-0.0211884	-0.00569207	0.139821	0.0159938	0.0119647
0.744	-0.0127833	-0.0216933	-0.00545239	0.142171	0.015828	0.0120192
0.745	-0.0122813	-0.022026	-0.00521791	0.144171	0.0157382	0.0119626
0.746	-0.0119989	-0.0220622	-0.00513301	0.145747	0.0159306	0.0117803
0.747	-0.0119215	-0.0217675	-0.00542984	0.146848	0.0163838	0.0115302
0.748	-0.0121561	-0.021223	-0.00614406	0.147462	0.0169078	0.011387
0.749	-0.0128782	-0.0206105	-0.0070409	0.147617	0.017391	0.0114474
0.75	-0.013962	-0.0200944	-0.00787619	0.147332	0.0177978	0.0116124
0.751	-0.0149752	-0.0196319	-0.00852741	0.146604	0.0181063	0.0117298
0.752	-0.0156256	-0.0190634	-0.008928	0.145504	0.0183591	0.0117153
0.753	-0.0159209	-0.0182354	-0.0090855	0.144215	0.0186063	0.0115861
0.754	-0.0159358	-0.0170394	-0.00907735	0.142883	0.0187958	0.0115067
0.755	-0.0157216	-0.0155465	-0.00898204	0.14154	0.0188404	0.0116077
0.756	-0.0153524	-0.0139726	-0.00886636	0.140218	0.0186494	0.0118543
0.757	-0.0148308	-0.0124947	-0.00877128	0.138943	0.0181039	0.0121546
0.758	-0.014043	-0.0112579	-0.0087365	0.137716	0.017186	0.0124199
0.759	-0.0129126	-0.010439	-0.00879795	0.136622	0.016028	0.0126161
0.76	-0.0115524	-0.0101426	-0.00890868	0.135757	0.0148111	0.0127337
0.761	-0.0102549	-0.010276	-0.00898649	0.135077	0.013727	0.0127236
0.762	-0.00929321	-0.0105775	-0.00901244	0.134442	0.0129661	0.0125588
0.763	-0.00877878	-0.0107967	-0.00897914	0.133717	0.0126113	0.0122497
0.764	-0.00870029	-0.0109065	-0.0088545	0.132785	0.0125677	0.0118135
0.765	-0.00892832	-0.0110926	-0.00863664	0.131606	0.0126886	0.0112904
0.766	-0.00925882	-0.0115132	-0.00838281	0.130332	0.0129152	0.0107477
0.767	-0.00954327	-0.012141	-0.00816741	0.129203	0.0132671	0.0102772
0.768	-0.00970226	-0.0127492	-0.0079154	0.128339	0.013781	0.0100505
0.769	-0.0097363	-0.0130725	-0.00739085	0.127752	0.0144319	0.0102498
0.77	-0.00974294	-0.0130563	-0.00644331	0.127438	0.0150435	0.0108617
0.771	-0.00970747	-0.0128246	-0.00513447	0.127293	0.0154247	0.0116875
0.772	-0.00947351	-0.0125	-0.00367218	0.127104	0.0155956	0.0125072
0.773	-0.00904908	-0.0121124	-0.00226965	0.126847	0.0157205	0.0131595
0.774	-0.00856629	-0.0116325	-0.00112015	0.126742	0.0159234	0.0135883
0.775	-0.00806278	-0.0110533	-0.000518439	0.126879	0.0162625	0.0138134
0.776	-0.00759892	-0.0103833	-0.000782997	0.127121	0.0167461	0.0138381
0.777	-0.00724914	-0.00966589	-0.00200837	0.127356	0.0172742	0.0137053
0.778	-0.00689439	-0.00896919	-0.00402418	0.127563	0.0176792	0.013525
0.779	-0.00637687	-0.00830599	-0.00653849	0.127746	0.0178572	0.0133255
0.78	-0.00575729	-0.00766807	-0.00916709	0.127917	0.0177792	0.0130629
0.781	-0.00517733	-0.00711785	-0.011452	0.128054	0.0174625	0.0127577
0.782	-0.00472046	-0.00673007	-0.01308	0.128098	0.0169742	0.0124708
0.783	-0.00456541	-0.00642822	-0.0139835	0.128035	0.0164215	0.0122274
0.784	-0.00493264	-0.00604517	-0.0141697	0.127963	0.0159123	0.0120595
0.785	-0.00576084	-0.00558934	-0.0136427	0.128112	0.0155138	0.012044
0.786	-0.00675146	-0.00526651	-0.0124983	0.128741	0.0152413	0.0122498
0.787	-0.00769707	-0.0052939	-0.0109598	0.129982	0.0150847	0.0126384
0.788	-0.00853423	-0.00571706	-0.00930143	0.131713	0.0150601	0.0130299
0.789	-0.00922808	-0.00627925	-0.00773104	0.133541	0.0152104	0.0132676
0.79	-0.00974484	-0.00664962	-0.00633947	0.135109	0.015572	0.0133498
0.791	-0.0100009	-0.00672111	-0.00514628	0.136394	0.0161274	0.0133315
0.792	-0.0097705	-0.00645321	-0.00412222	0.137577	0.0167841	0.013256
0.793	-0.00888261	-0.00575081	-0.00327109	0.138824	0.0174453	0.0131742
0.794	-0.0075659	-0.00468984	-0.00267999	0.140141	0.0180696	0.0130642
0.795	-0.00633311	-0.00343901	-0.00240712	0.141425	0.0186661	0.0128396
0.796	-0.0055445	-0.00198394	-0.00250965	0.14268	0.019222	0.0125046
0.797	-0.00528	-0.000326522	-0.00303887	0.14398	0.0196936	0.0121542
0.798	-0.00548809	0.00130036	-0.00392643	0.145287	0.0200509	0.0119081
0.799	-0.00604699	0.00263582	-0.00507079	0.146535	0.0202256	0.0118625
0.8	-0.00682427	0.00354567	-0.00638998	0.147701	0.0201839	0.0120276
0.801	-0.00777216	0.00402063	-0.00773826	0.148608	0.0200298	0.0123804
0.802	-0.00890888	0.0041403	-0.00888843	0.148997	0.0199264	0.0129307
0.803	-0.0102255	0.0039663	-0.00960887	0.148849	0.0199742	0.0136183
0.804	-0.0115925	0.00358243	-0.00976959	0.148321	0.0201832	0.0142401
0.805	-0.0128211	0.00320705	-0.00948388	0.147562	0.020521	0.0146013
0.806	-0.01386	0.00308947	-0.00914098	0.146757	0.0209267	0.0146436
0.807	-0.014776	0.00331923	-0.00904858	0.146108	0.0212903	0.0144295
0.808	-0.0155591	0.00376259	-0.00914308	0.145643	0.0214692	0.0140836
0.809	-0.0160636	0.00423548	-0.00921186	0.145152	0.0213641	0.0137274
0.81	-0.0160974	0.00469149	-0.00914369	0.144442	0.020937	0.0134205
0.811	-0.0156025	0.00511975	-0.00899172	0.143489	0.0201692	0.0131766
0.812	-0.0147417	0.00544925	-0.00887658	0.142273	0.0191553	0.0130296
0.813	-0.0137667	0.00566631	-0.00875309	0.140807	0.0181682	0.0130177
0.814	-0.0129492	0.00582917	-0.00849413	0.139231	0.0174463	0.0131541
0.815	-0.012546	0.00598343	-0.00813386	0.137623	0.0170238	0.0134005
0.816	-0.012625	0.00624693	-0.00775307	0.135934	0.0168364	0.0136461
0.817	-0.0130743	0.00678336	-0.00723283	0.134113	0.0168374	0.0137891
0.818	-0.0137962	0.00757154	-0.00633025	0.13212	0.0169876	0.0137898
0.819	-0.0147111	0.00842983	-0.00502548	0.129962	0.0172721	0.0136683
0.82	-0.0156333	0.00921007	-0.00361026	0.127748	0.0177284	0.0135543
0.821	-0.0163495	0.0098591	-0.00238723	0.125573	0.0183613	0.0135737
0.822	-0.0167793	0.0104067	-0.0014866	0.123489	0.0191272	0.0136534
0.823	-0.0169125	0.0109397	-0.000951416	0.121563	0.0199676	0.013678
0.824	-0.0167399	0.0114756	-0.000808328	0.119828	0.0207329	0.0136962
0.825	-0.0162905	0.0118115	-0.00104045	0.1183	0.0212142	0.0138048
0.826	-0.0156463	0.0116887	-0.00157544	0.117031	0.0212831	0.0139923
0.827	-0.0149988	0.0110859	-0.00229206	0.116075	0.0209107	0.0141491
0.828	-0.0146356	0.0101666	-0.00295546	0.115447	0.0201826	0.0141954
0.829	-0.0147644	0.00907789	-0.00329218	0.115102	0.0193056	0.0141207
0.83	-0.015375	0.00786871	-0.00320772	0.114954	0.0184297	0.0139045
0.831	-0.0162755	0.006565	-0.00272899	0.114872	0.0176036	0.0135229
0.832	-0.0171859	0.00536755	-0.001857	0.114729	0.0168986	0.0129833
0.833	-0.017776	0.00454063	-0.000654457	0.114526	0.0163675	0.0123198
0.834	-0.017822	0.00412761	0.000717457	0.114374	0.0159609	0.0116417
0.835	-0.0173953	0.00408321	0.00207035	0.114375	0.0156487	0.011069
0.836	-0.0167218	0.00446758	0.00321978	0.114568	0.0155055	0.0106205
0.837	-0.0159635	0.00524234	0.00402411	0.115002	0.0155847	0.010285
0.838	-0.0152132	0.00607649	0.00442474	0.115767	0.015894	0.0101193
0.839	-0.014496	0.00657456	0.00449471	0.116826	0.0163994	0.0102563
0.84	-0.0138228	0.00667805	0.00440444	0.118001	0.0169264	0.010793
0.841	-0.0132976	0.00665769	0.00423137	0.119101	0.0172304	0.0116703
0.842	-0.0130676	0.00666729	0.00384359	0.119966	0.0171969	0.0127131
0.843	-0.0131509	0.006622	0.00306854	0.120484	0.0169516	0.0137299
0.844	-0.0133578	0.00649248	0.00193995	0.120624	0.0167396	0.0145471
0.845	-0.0134295	0.00635503	0.000652983	0.120413	0.0166732	0.0150287
0.846	-0.0131745	0.00623235	-0.000626265	0.119951	0.0167204	0.0151547
0.847	-0.0125409	0.0060672	-0.00174756	0.119446	0.0168327	0.0150039
0.848	-0.011637	0.00579809	-0.0025192	0.119057	0.0169585	0.0146183
0.849	-0.0106333	0.00542362	-0.00284626	0.118783	0.0170764	0.0139909
0.85	-0.0097456	0.00502869	-0.00284134	0.11859	0.0171846	0.0131981
0.851	-0.00918988	0.00473317	-0.0026277	0.118422	0.0172476	0.0124359
0.852	-0.0090122	0.00457581	-0.00212675	0.118203	0.0172586	0.0118847
0.853	-0.00912376	0.00449951	-0.00126951	0.117967	0.0172834	0.0116176
0.854	-0.00943944	0.00444625	-0.000257015	0.117858	0.0174101	0.0116339
0.855	-0.00986066	0.00442761	0.000655997	0.117931	0.0176098	0.0118984
0.856	-0.0102519	0.00457473	0.00139268	0.118038	0.017727	0.0123343
0.857	-0.0104769	0.00503503	0.00191883	0.117962	0.0176838	0.012838
0.858	-0.0104657	0.00579342	0.00212536	0.117597	0.0175019	0.0133151
0.859	-0.0102795	0.0067509	0.00188545	0.11699	0.0172011	0.0137523
0.86	-0.0100453	0.00782791	0.00116781	0.116303	0.0168037	0.0142224
0.861	-0.00986847	0.0088561	7.3777e-05	0.115692	0.0163661	0.0147675
0.862	-0.0098013	0.0095182	-0.00113005	0.115165	0.0160187	0.015391
0.863	-0.00979943	0.00955384	-0.00196371	0.114656	0.0159081	0.0160177
0.864	-0.00973076	0.00899304	-0.0020141	0.114156	0.0160866	0.0164601
0.865	-0.00946916	0.00807809	-0.00122123	0.113622	0.016524	0.0165957
0.866	-0.00907188	0.0070733	0.000200331	0.112951	0.0172075	0.0164052
0.867	-0.00874458	0.00619534	0.00187102	0.112161	0.0181179	0.015934
0.868	-0.00854684	0.00554059	0.00335779	0.111412	0.0191122	0.0153399
0.869	-0.00841256	0.00510852	0.00436518	0.11088	0.0200652	0.0147483
0.87	-0.00831959	0.0049859	0.00483262	0.110634	0.0209934	0.0141877
0.871	-0.0082232	0.00532404	0.00488951	0.110638	0.0218246	0.0137742
0.872	-0.00803213	0.00610027	0.00471411	0.110914	0.0223333	0.0136703
0.873	-0.00769655	0.0070667	0.00437018	0.111493	0.0223833	0.0138861
0.874	-0.00725414	0.00794003	0.00382635	0.112183	0.0220364	0.014342
0.875	-0.00682712	0.00857657	0.00316456	0.112706	0.021439	0.0149859
0.876	-0.00655484	0.00894289	0.00259255	0.112981	0.0206943	0.0157092
0.877	-0.00647472	0.00897158	0.00225897	0.113097	0.0198722	0.0163085
0.878	-0.00654571	0.00858672	0.00218893	0.113111	0.0190837	0.0166305
0.879	-0.00677933	0.00786794	0.00227331	0.113029	0.0184865	0.0166603
0.88	-0.00722085	0.00703376	0.00229096	0.112862	0.0181711	0.0164435
0.881	-0.0078007	0.00626858	0.00202205	0.11266	0.0181401	0.0160205
0.882	-0.00833531	0.00559401	0.00139444	0.112419	0.0184202	0.0154431
0.883	-0.00876872	0.00486993	0.000536067	0.112062	0.0189808	0.014806
0.884	-0.00923719	0.00403415	-0.00043401	0.111637	0.0196402	0.0142603
0.885	-0.00981981	0.0032468	-0.00148873	0.111318	0.0201884	0.0139235
0.886	-0.0103931	0.00270448	-0.00255199	0.111113	0.020527	0.0137675
0.887	-0.0107096	0.00248026	-0.00356488	0.11088	0.0206829	0.0136939
0.888	-0.0105762	0.00242399	-0.00456057	0.110558	0.0207065	0.013678
0.889	-0.0100351	0.00225718	-0.00559136	0.110165	0.020579	0.0137545
0.89	-0.00929818	0.00191691	-0.00667118	0.109718	0.0202029	0.0139425
0.891	-0.00851055	0.00158187	-0.00779058	0.109207	0.0195206	0.014251
0.892	-0.00769698	0.00139484	-0.00899079	0.108591	0.0186102	0.0146691
0.893	-0.00686714	0.00132014	-0.0102735	0.107915	0.0176133	0.0151035
0.894	-0.00611411	0.00121464	-0.0114694	0.10732	0.016684	0.0154518
0.895	-0.00550925	0.00100139	-0.0123618	0.106887	0.0159798	0.0157554
0.896	-0.00501446	0.00074014	-0.0128002	0.106535	0.0156219	0.0161275
0.897	-0.00470946	0.000464135	-0.012652	0.106143	0.0156293	0.0165072
0.898	-0.00472894	8.4993e-05	-0.0118149	0.105731	0.0159071	0.0167266
0.899	-0.00497852	-0.000414234	-0.0103799	0.105363	0.0163805	0.0168053
0.9	-0.00530473	-0.000937265	-0.00866428	0.105018	0.0170535	0.0168299
0.901	-0.00564863	-0.00138061	-0.0069515	0.104708	0.0178637	0.0167609
0.902	-0.0058762	-0.00161584	-0.00534304	0.104497	0.0186149	0.01661
0.903	-0.00582683	-0.00161197	-0.00385336	0.104319	0.0192007	0.0164828
0.904	-0.0055348	-0.00156945	-0.00249023	0.104008	0.0197062	0.0164021
0.905	-0.00513902	-0.00169712	-0.00125017	0.103484	0.0202422	0.016287
0.906	-0.00469966	-0.00197313	-0.000180426	0.102748	0.0208215	0.0160685
0.907	-0.00432019	-0.00227824	0.000581269	0.101846	0.0212989	0.0157916
0.908	-0.00418189	-0.00253061	0.00101502	0.100912	0.0215257	0.0156018
0.909	-0.00431133	-0.00267319	0.00124778	0.100101	0.0215438	0.015569
0.91	-0.00460601	-0.00273881	0.0012691	0.0994645	0.0214623	0.0156325
0.911	-0.00500443	-0.00284978	0.000946345	0.0989649	0.0212917	0.0157271
0.912	-0.00547282	-0.0031142	0.000270211	0.0985926	0.0209428	0.0158044
0.913	-0.00602089	-0.00359598	-0.000627113	0.098408	0.0203523	0.0158538
0.914	-0.00670054	-0.00433666	-0.00157667	0.0983447	0.0196362	0.015939
0.915	-0.00747264	-0.00528044	-0.00245212	0.0981347	0.0190041	0.0160461
0.916	-0.00817525	-0.00620806	-0.00316485	0.0975824	0.0185487	0.0160371
0.917	-0.00868944	-0.00683583	-0.00354761	0.0967277	0.0182213	0.015821
0.918	-0.00908723	-0.00691684	-0.00335868	0.0957261	0.0178828	0.0154081
0.919	-0.00948728	-0.006266	-0.00248075	0.0947885	0.0173911	0.0148661
0.92	-0.00980281	-0.0048358	-0.00101264	0.0940844	0.0167764	0.014353
0.921	-0.00981084	-0.00282779	0.000801952	0.0935965	0.0162296	0.0140829
0.922	-0.00938597	-0.000639788	0.00264859	0.0932757	0.0158447	0.0141394
0.923	-0.00855923	0.00138614	0.00426483	0.0931656	0.0155224	0.0143999
0.924	-0.00744261	0.00309458	0.005464	0.0931899	0.0151533	0.0147066
0.925	-0.00614591	0.00436538	0.00611982	0.093134	0.0147827	0.0150247
0.926	-0.00471172	0.00504232	0.00632651	0.0928998	0.0145211	0.0153493
0.927	-0.00315912	0.00510294	0.00628594	0.0925233	0.0143485	0.0155842
0.928	-0.00163882	0.0047314	0.0059958	0.0920224	0.0141761	0.0156665
0.929	-0.000394834	0.00420334	0.00536601	0.091431	0.0140049	0.0156589
0.93	0.000484645	0.00373568	0.00447179	0.0909003	0.0139021	0.0156441
0.931	0.00109589	0.00340961	0.00354614	0.0905923	0.0139519	0.0156708
0.932	0.00153426	0.00323465	0.00281627	0.0904929	0.014218	0.0157812
0.933	0.00183409	0.00325494	0.00237516	0.0904469	0.0147249	0.0160022
0.934	0.00197739	0.00354472	0.00226203	0.0903655	0.0154561	0.0163281
0.935	0.00186528	0.00411151	0.00251893	0.0902452	0.0163113	0.0167231
0.936	0.00139726	0.00490515	0.00306442	0.0900587	0.0171786	0.0171312
0.937	0.000652511	0.00591642	0.00371128	0.0897533	0.017984	0.0175225
0.938	-0.000146711	0.00715779	0.00434973	0.0892797	0.0186186	0.0179222
0.939	-0.000885826	0.00855394	0.00495197	0.0886266	0.019022	0.0183223
0.94	-0.00157606	0.00994511	0.00544245	0.0878388	0.01925	0.0186022
0.941	-0.00217336	0.0112036	0.00574035	0.086991	0.0193287	0.0186704
0.942	-0.00256065	0.0122244	0.00587342	0.0861545	0.0191979	0.0186233
0.943	-0.00266175	0.0128418	0.00595308	0.0853631	0.0188643	0.0186176
0.944	-0.00243543	0.012908	0.00611782	0.0846431	0.0185178	0.01872
0.945	-0.00183529	0.0124688	0.00638173	0.0840121	0.0184207	0.0188937
0.946	-0.000948942	0.0117673	0.00647806	0.0834598	0.018718	0.0190354
0.947	-5.56749e-05	0.0110138	0.00608955	0.0830383	0.0194086	0.0190616
0.948	0.000552433	0.0102673	0.00518451	0.0828193	0.0203782	0.018939
0.949	0.000722156	0.00955709	0.0039881	0.0827669	0.0213954	0.0186988
0.95	0.000464046	0.00891763	0.00273879	0.0827669	0.0221962	0.0183975
0.951	-7.87854e-05	0.0083726	0.00160327	0.0827109	0.0226139	0.0180507
0.952	-0.000697998	0.00800834	0.000766151	0.0825613	0.022646	0.0176957
0.953	-0.00123224	0.00785486	0.000374978	0.0823545	0.0224421	0.0174097
0.954	-0.00159843	0.00783314	0.000394457	0.0821411	0.0221515	0.0172238
0.955	-0.00171481	0.00802048	0.000594932	0.0819499	0.0218427	0.0171082
0.956	-0.0015135	0.00861378	0.000673782	0.0818201	0.0215948	0.0170627
0.957	-0.000994778	0.00954965	0.000466096	0.0818558	0.0215177	0.0171156
0.958	-0.000213608	0.0105271	3.09487e-05	0.0821482	0.0216228	0.0172304
0.959	0.000706661	0.0113245	-0.000496711	0.0826677	0.0217524	0.0173769
0.96	0.00152739	0.0118223	-0.00106099	0.083293	0.0217759	0.0176272
0.961	0.00200524	0.011875	-0.00165105	0.0838385	0.0217482	0.0180258
0.962	0.00210493	0.0113568	-0.00216274	0.0841004	0.0217688	0.0184822
0.963	0.0019856	0.0103859	-0.00238797	0.0839614	0.0218099	0.0188746
0.964	0.00186388	0.00934112	-0.00219033	0.083461	0.0217606	0.0191116
0.965	0.00193204	0.00850637	-0.00163267	0.0827543	0.0215679	0.0191344
0.966	0.00223566	0.00790922	-0.000920655	0.082027	0.0212827	0.0189511
0.967	0.00264207	0.0074871	-0.000234256	0.081512	0.0210178	0.0186681
0.968	0.00293186	0.00718552	0.000488145	0.0813684	0.0208364	0.0183991
0.969	0.00291237	0.00698101	0.00148665	0.0814235	0.0207061	0.0180574
0.97	0.00256754	0.00686011	0.00281756	0.0813727	0.0205874	0.0175003
0.971	0.0020182	0.00674075	0.00431333	0.0811361	0.0205121	0.016797
0.972	0.00132467	0.00651904	0.00582053	0.080731	0.0205262	0.016098
0.973	0.000473285	0.00617342	0.00724318	0.080173	0.0205643	0.0154917
0.974	-0.000454172	0.00567282	0.00843478	0.0795999	0.0204952	0.0150708
0.975	-0.00120891	0.00487444	0.00917692	0.0791963	0.0202763	0.0149212
0.976	-0.00159788	0.00367234	0.00932291	0.0790396	0.0199801	0.0150038
0.977	-0.00159556	0.00213307	0.00887536	0.0791414	0.0197698	0.0151834
0.978	-0.00115257	0.000410075	0.0079519	0.0795406	0.0198657	0.0153375
0.979	-0.000197844	-0.00135765	0.00675975	0.0802236	0.0203526	0.0153676
0.98	0.00118947	-0.00308238	0.00554686	0.0810587	0.0210345	0.0152669
0.981	0.00279187	-0.00475708	0.00458686	0.0818807	0.0216283	0.0151661
0.982	0.00439055	-0.00641238	0.00415379	0.0825327	0.0219889	0.0151889
0.983	0.00583991	-0.00800666	0.00438049	0.0828762	0.0220916	0.0153505
0.984	0.00706748	-0.00940782	0.00517699	0.0829339	0.0219411	0.0156073
0.985	0.00802503	-0.0105096	0.00633368	0.0829103	0.0215848	0.0159244
0.986	0.00861989	-0.0112222	0.0076415	0.0828922	0.0212167	0.0163344
0.987	0.00874922	-0.0113713	0.00889793	0.0827742	0.0210759	0.0168916
0.988	0.00838115	-0.0108409	0.00989915	0.0825314	0.0212067	0.0176143
0.989	0.00760752	-0.00974667	0.0105442	0.0822724	0.0215045	0.0184437
0.99	0.00667534	-0.00834775	0.0108383	0.0821223	0.0218805	0.0191561
0.991	0.00582179	-0.00689238	0.0107988	0.0821515	0.0222757	0.0195393
0.992	0.00507148	-0.0055983	0.010492	0.0822651	0.0226504	0.0196416
0.993	0.00433394	-0.00466716	0.0100294	0.0822697	0.0229667	0.0196423
0.994	0.00356161	-0.00428602	0.00947635	0.0821065	0.0231827	0.0196061
0.995	0.00275919	-0.00457399	0.00878917	0.0818922	0.0233031	0.0195326
0.996	0.00194076	-0.005361	0.00782729	0.081786	0.0233775	0.0194692
0.997	0.0011054	-0.00627534	0.00648293	0.0818086	0.0234773	0.0194482
0.998	0.0002595	-0.00719903	0.00478146	0.0818203	0.0236126	0.0194892
0.999	-0.000594646	-0.00819429	0.00278706	0.0817294	0.0236737	0.0195565
1	-0.00144968	-0.00912122	0.000501445	0.0815401	0.0235668	0.0194854
1.001	-0.00223005	-0.00976017	-0.00200437	0.0812796	0.0233369	0.0191644
1.002	-0.00282107	-0.01007	-0.00449776	0.0810186	0.0231224	0.0186714
1.003	-0.00320308	-0.0101102	-0.00672496	0.0808526	0.0229924	0.0181082
1.004	-0.00349568	-0.00987412	-0.00851303	0.0808271	0.0228534	0.0174888
1.005	-0.0037272	-0.00930857	-0.00979879	0.0808889	0.022553	0.0168645
1.006	-0.00367554	-0.00835048	-0.0106382	0.0809153	0.0220315	0.0163667
1.007	-0.00308471	-0.00692695	-0.011146	0.0808119	0.0213397	0.0160965
1.008	-0.00191963	-0.00512448	-0.0114458	0.0805741	0.0205952	0.0160501
1.009	-0.000439586	-0.00324074	-0.011628	0.0802418	0.0198961	0.016141
1.01	0.00100777	-0.00151457	-0.0117599	0.079838	0.0192012	0.016321
1.011	0.00231537	0.000125998	-0.0119326	0.0793719	0.018412	0.0166443
1.012	0.00362156	0.00196228	-0.0121519	0.0788565	0.0175475	0.0171831
1.013	0.00507689	0.00407501	-0.0122506	0.0782951	0.0167589	0.0179047
1.014	0.00665596	0.00624736	-0.0120653	0.0776718	0.016227	0.0186543
1.015	0.00811472	0.00829449	-0.0115405	0.0769972	0.0160478	0.0192214
1.016	0.0091765	0.0101613	-0.0106491	0.0762996	0.0161627	0.019402
1.017	0.00971189	0.0118475	-0.0094248	0.0755689	0.0164094	0.0190948
1.018	0.00971059	0.0134194	-0.0080177	0.0747917	0.016656	0.0184187
1.019	0.00929856	0.0149171	-0.00661671	0.0740442	0.0168636	0.0176792
1.02	0.00875912	0.0162375	-0.00533552	0.0734946	0.0170968	0.0170945
1.021	0.00833917	0.0171825	-0.00420018	0.0731928	0.0174844	0.0166476
1.022	0.00813045	0.0176346	-0.00320536	0.0730134	0.0180949	0.0163065
1.023	0.00813971	0.0176022	-0.00237452	0.0729325	0.0188723	0.0161623
1.024	0.00837046	0.0171521	-0.00180221	0.0730334	0.0197095	0.0162625
1.025	0.00886321	0.0164049	-0.00160946	0.073289	0.0205332	0.0165194
1.026	0.00959648	0.0154528	-0.00186198	0.0736692	0.0213238	0.01683
1.027	0.010406	0.0143169	-0.0025104	0.0742396	0.0221421	0.0172096
1.028	0.0110942	0.0130779	-0.00341204	0.0750072	0.0230753	0.0178185
1.029	0.0115229	0.0118696	-0.00433626	0.0759019	0.0241067	0.018763
1.03	0.0116033	0.0107094	-0.00496235	0.0769222	0.0251571	0.0199369
1.031	0.011333	0.00952729	-0.00509364	0.0781414	0.0262092	0.0212105
1.032	0.0108049	0.00832007	-0.00476298	0.0796133	0.0273361	0.0225606
1.033	0.0100639	0.00715804	-0.00405409	0.0814242	0.0286256	0.0239259
1.034	0.0090615	0.00615114	-0.00294603	0.0837092	0.0300613	0.0251808
1.035	0.00784142	0.00546001	-0.00132621	0.086479	0.0315484	0.0263256
1.036	0.00668767	0.00523954	0.000847309	0.0896022	0.0330208	0.0275224
1.037	0.00594271	0.00556555	0.00350138	0.0929442	0.0344667	0.0288631
1.038	0.00579891	0.0064525	0.00651507	0.0964002	0.0359384	0.0303204
1.039	0.00636584	0.0078267	0.00968353	0.0998671	0.0375442	0.0319115
1.04	0.00761133	0.00951818	0.0127259	0.103145	0.0393161	0.0336717
1.041	0.00922806	0.0114283	0.0153617	0.105953	0.041141	0.0355712
1.042	0.0108358	0.0135602	0.017343	0.108141	0.0429428	0.0375311
1.043	0.0122662	0.0158138	0.0185322	0.109811	0.0447195	0.0394302
1.044	0.0135351	0.0179235	0.0189612	0.111142	0.0463477	0.0411901
1.045	0.0146468	0.0196223	0.0187357	0.112146	0.0476403	0.0428395
1.046	0.0155695	0.0208063	0.0179797	0.112799	0.0485649	0.0444145
1.047	0.0162756	0.0215508	0.0168665	0.113266	0.0491914	0.0459081
1.048	0.0166931	0.0219267	0.015566	0.113746	0.0495015	0.0472926
1.049	0.0167169	0.0219353	0.0141613	0.11426	0.049399	0.0484547
1.05	0.0162883	0.0216893	0.0126473	0.114673	0.0488797	0.0491749
1.051	0.0154284	0.0214067	0.010997	0.1148	0.0480502	0.049224
1.052	0.0142339	0.0213039	0.00921236	0.114476	0.0469581	0.0484144
1.053	0.0128845	0.0215181	0.00742759	0.113588	0.045538	0.046681
1.054	0.0116424	0.0219716	0.00598076	0.112065	0.0437437	0.0441614
1.055	0.0107796	0.0224397	0.00519113	0.109989	0.0416316	0.0411596
1.056	0.0103912	0.0227607	0.00508073	0.107575	0.0392902	0.038068
1.057	0.0103438	0.0228608	0.00538032	0.104935	0.0367448	0.0351753
1.058	0.0104843	0.0226618	0.00577734	0.102074	0.0340363	0.0325464
1.059	0.0107031	0.0221079	0.00616807	0.0990523	0.0313302	0.0301893
1.06	0.0108778	0.0211858	0.0065925	0.0960057	0.0287845	0.0281855
1.061	0.0109049	0.0198339	0.00700583	0.0930172	0.0264505	0.026592
1.062	0.0107078	0.0180017	0.00733921	0.0900525	0.024381	0.0253504
1.063	0.0102696	0.0157474	0.00761814	0.0870847	0.0227051	0.0243152
1.064	0.00961268	0.0131703	0.00791612	0.0841947	0.0215437	0.0233164
1.065	0.0088677	0.0104821	0.00832187	0.0814489	0.0208855	0.0222376
1.066	0.00837323	0.00809058	0.00892141	0.0788751	0.0206831	0.0211265
1.067	0.0083942	0.00632774	0.00980913	0.0765541	0.0209613	0.0202232
1.068	0.00885392	0.00532275	0.011057	0.0744675	0.0216994	0.0197184
1.069	0.00949041	0.00517252	0.0126481	0.072467	0.0227036	0.0195166
1.07	0.010122	0.00588336	0.0145159	0.0705309	0.0236345	0.0193869
1.071	0.0107266	0.00727807	0.0166591	0.0687834	0.0242185	0.019196
1.072	0.0113376	0.00907877	0.0191046	0.0673647	0.0243545	0.0189408
1.073	0.0119576	0.0109673	0.0217247	0.0663972	0.0240569	0.0187048
1.074	0.0125872	0.0127741	0.024279	0.0658927	0.02348	0.0185681
1.075	0.013233	0.014596	0.0265593	0.065759	0.022838	0.018534
1.076	0.013885	0.0165139	0.0284058	0.0660217	0.0222982	0.0185946
1.077	0.0145368	0.0184251	0.0297123	0.0668456	0.0219743	0.0187906
1.078	0.0151994	0.0201538	0.0304758	0.0682198	0.0219307	0.0191027
1.079	0.0159024	0.0215098	0.0308536	0.0698111	0.022254	0.0194124
1.08	0.0167136	0.0224328	0.0310907	0.0712023	0.0229365	0.019617
1.081	0.0176839	0.0230608	0.0313125	0.0721662	0.023781	0.019682
1.082	0.018774	0.023507	0.0314497	0.0726912	0.0246485	0.019636
1.083	0.0199107	0.0237905	0.0314184	0.072803	0.0255339	0.0195436
1.084	0.0210224	0.0239478	0.0312305	0.0724801	0.026445	0.0194733
1.085	0.0220079	0.0240192	0.0309658	0.0717881	0.027354	0.0194897
1.086	0.0228112	0.023988	0.0307904	0.0709642	0.028166	0.0196226
1.087	0.0235082	0.023738	0.0308585	0.0703008	0.0288398	0.0198616
1.088	0.0242002	0.023191	0.0312546	0.069951	0.029467	0.0201149
1.089	0.0249515	0.0224394	0.0320775	0.0698439	0.030188	0.0202483
1.09	0.0258671	0.0214776	0.033362	0.0698339	0.0310886	0.0203143
1.091	0.0269629	0.0201465	0.0350349	0.0698935	0.0320956	0.0204923
1.092	0.0280465	0.0184938	0.0370508	0.0700971	0.0331285	0.020829
1.093	0.0288627	0.0168259	0.039433	0.0705265	0.0343352	0.0212905
1.094	0.0291933	0.0155459	0.0422369	0.0711997	0.0359864	0.0218831
1.095	0.028869	0.0150489	0.0455585	0.0719779	0.0382978	0.0226929
1.096	0.0278182	0.0156244	0.0495087	0.0726298	0.0413709	0.0239579
1.097	0.0260917	0.0174866	0.0541329	0.0729861	0.0451706	0.026013
1.098	0.0238699	0.0207911	0.0592753	0.0729697	0.0495477	0.0291296
1.099	0.021415	0.0255492	0.0644908	0.0725869	0.0542619	0.0333255
1.1	0.0188294	0.0315011	0.0691604	0.0718915	0.059001	0.0383156
1.101	0.0158167	0.0380437	0.0727244	0.0709005	0.0634414	0.0437144
1.102	0.0118594	0.04444	0.0748114	0.069501	0.0672596	0.0491439
1.103	0.00657631	0.0501361	0.0750639	0.0673957	0.0699983	0.0541732
1.104	-0.000355215	0.0547148	0.0728652	0.0641531	0.0710345	0.0583702
1.105	-0.00950658	0.0576071	0.0674857	0.0592882	0.0697439	0.061339
1.106	-0.0216193	0.0580428	0.0584148	0.0523246	0.0656504	0.0626146
1.107	-0.0372498	0.0552723	0.0453876	0.0428622	0.0585009	0.0616759
1.108	-0.0565738	0.0488135	0.0283412	0.0306168	0.048203	0.058097
1.109	-0.0794514	0.0384918	0.00742248	0.0154869	0.0346951	0.0516507
1.11	-0.105655	0.0242656	-0.017129	-0.0024251	0.017996	0.0422794
1.111	-0.135043	0.00607891	-0.0450832	-0.0230093	-0.00169437	0.0299771
1.112	-0.167468	-0.0161356	-0.0761634	-0.0462411	-0.0241264	0.0147045
1.113	-0.202719	-0.0423084	-0.110022	-0.0719945	-0.0490935	-0.0035726
1.114	-0.240659	-0.0720375	-0.146311	-0.0999672	-0.0763368	-0.0247786
1.115	-0.281225	-0.104646	-0.184596	-0.129818	-0.105482	-0.0488063
1.116	-0.32414	-0.139536	-0.224317	-0.161319	-0.136091	-0.0756102
1.117	-0.36878	-0.176376	-0.265008	-0.194353	-0.167877	-0.104972
1.118	-0.414495	-0.214938	-0.306365	-0.228823	-0.200797	-0.136424
1.119	-0.460849	-0.254941	-0.34818	-0.26463	-0.234805	-0.169551
1.12	-0.50749	-0.296057	-0.390376	-0.301629	-0.269719	-0.204099
1.121	-0.554044	-0.337971	-0.432822	-0.33951	-0.305435	-0.239902
1.122	-0.600159	-0.380367	-0.475155	-0.377919	-0.341996	-0.276825
1.123	-0.645525	-0.422925	-0.517028	-0.416662	-0.379377	-0.314726
1.124	-0.689935	-0.465375	-0.55837	-0.455651	-0.41743	-0.353465
1.125	-0.733427	-0.507417	-0.599239	-0.494774	-0.45598	-0.39289
1.126	-0.776196	-0.548682	-0.63969	-0.534004	-0.494879	-0.432814
1.127	-0.818309	-0.588955	-0.67976	-0.573463	-0.534042	-0.473109
1.128	-0.859683	-0.628342	-0.719381	-0.613196	-0.573352	-0.513793
1.129	-0.900315	-0.667159	-0.758402	-0.653058	-0.612582	-0.554958
1.13	-0.940325	-0.705608	-0.796642	-0.692941	-0.6515	-0.596679
1.131	-0.979726	-0.743581	-0.833972	-0.732903	-0.690031	-0.639009
1.132	-1.0183	-0.78087	-0.870409	-0.773053	-0.728267	-0.68188
1.133	-1.05586	-0.817392	-0.906053	-0.813406	-0.766246	-0.724991
1.134	-1.09245	-0.853189	-0.940967	-0.853858	-0.80384	-0.767987
1.135	-1.12812	-0.888348	-0.975082	-0.894313	-0.840899	-0.810662
1.136	-1.16286	-0.922833	-1.00823	-0.934699	-0.877357	-0.852886
1.137	-1.19674	-0.956479	-1.04031	-0.974823	-0.913217	-0.894534
1.138	-1.22974	-0.989254	-1.07137	-1.0144	-0.948438	-0.93552
1.139	-1.26179	-1.02125	-1.10149	-1.05319	-0.982884	-0.975793
1.14	-1.29282	-1.05249	-1.13073	-1.09102	-1.01646	-1.01531
1.141	-1.32281	-1.08301	-1.15906	-1.12776	-1.04919	-1.05403
1.142	-1.35173	-1.11288	-1.18652	-1.16326	-1.0811	-1.0919
1.143	-1.37964	-1.1422	-1.2132	-1.19756	-1.11222	-1.12886
1.144	-1.40671	-1.17093	-1.2391	-1.23082	-1.14254	-1.16483
1.145	-1.43308	-1.199	-1.26412	-1.26314	-1.17195	-1.19968
1.146	-1.45874	-1.22638	-1.2882	-1.29452	-1.20042	-1.23331
1.147	-1.48363	-1.25304	-1.31129	-1.32499	-1.2278	-1.26572
1.148	-1.50773	-1.27888	-1.33325	-1.35467	-1.25389	-1.29688
1.149	-1.53103	-1.30368	-1.35394	-1.38362	-1.27863	-1.3268
1.15	-1.55356	-1.3272	-1.37328	-1.41174	-1.30207	-1.35554
1.151	-1.57542	-1.3493	-1.39137	-1.43899	-1.32419	-1.38321
1.152	-1.59661	-1.37002	-1.40827	-1.46533	-1.34498	-1.40983
1.153	-1.61696	-1.38949	-1.4239	-1.49075	-1.36445	-1.43539
1.154	-1.63621	-1.4078	-1.43817	-1.51517	-1.38271	-1.45986
1.155	-1.6542	-1.42493	-1.45109	-1.53844	-1.40011	-1.48328
1.156	-1.67086	-1.44086	-1.46274	-1.56042	-1.41678	-1.50567
1.157	-1.68633	-1.45557	-1.47328	-1.58109	-1.43265	-1.52696
1.158	-1.70084	-1.46905	-1.48292	-1.60058	-1.44762	-1.54698
1.159	-1.71449	-1.4813	-1.49169	-1.61905	-1.46166	-1.56562
1.16	-1.72721	-1.49242	-1.49953	-1.63668	-1.47482	-1.5829
1.161	-1.73899	-1.50256	-1.50641	-1.65365	-1.48708	-1.59888
1.162	-1.74993	-1.51192	-1.51245	-1.67008	-1.49832	-1.61367
1.163	-1.76012	-1.52078	-1.5178	-1.68596	-1.50841	-1.62738
1.164	-1.76954	-1.52927	-1.52253	-1.70112	-1.51743	-1.64015
1.165	-1.77814	-1.53718	-1.52683	-1.71541	-1.52558	-1.65199
1.166	-1.78593	-1.54424	-1.53102	-1.72878	-1.53295	-1.66289
1.167	-1.79293	-1.55031	-1.53528	-1.74124	-1.53948	-1.67298
1.168	-1.79919	-1.55541	-1.53959	-1.75269	-1.54513	-1.68242
1.169	-1.80459	-1.55961	-1.54372	-1.76301	-1.54999	-1.6912
1.17	-1.80906	-1.56293	-1.54746	-1.77223	-1.55409	-1.69922
1.171	-1.81266	-1.56536	-1.55061	-1.78046	-1.55742	-1.70645
1.172	-1.81547	-1.56696	-1.55299	-1.78775	-1.56009	-1.71289
1.173	-1.81743	-1.56777	-1.5544	-1.7941	-1.56222	-1.71851
1.174	-1.81853	-1.56778	-1.55488	-1.79951	-1.56392	-1.72327
1.175	-1.81885	-1.56703	-1.5547	-1.80404	-1.56526	-1.72715
1.176	-1.81844	-1.56565	-1.5541	-1.80771	-1.56621	-1.73018
1.177	-1.81729	-1.56385	-1.55317	-1.8106	-1.56672	-1.73242
1.178	-1.81533	-1.56183	-1.55198	-1.81285	-1.56673	-1.73393
1.179	-1.81248	-1.55968	-1.55055	-1.81467	-1.56631	-1.73478
1.18	-1.80883	-1.55736	-1.54883	-1.81618	-1.56554	-1.73499
1.181	-1.80455	-1.55485	-1.54668	-1.8174	-1.56445	-1.73465
1.182	-1.79989	-1.55218	-1.54397	-1.8183	-1.56299	-1.73397
1.183	-1.79517	-1.54936	-1.5406	-1.81895	-1.56121	-1.73301
1.184	-1.79058	-1.5463	-1.53666	-1.8194	-1.55929	-1.73169
1.185	-1.78623	-1.543	-1.53229	-1.81959	-1.55735	-1.72998
1.186	-1.78215	-1.53951	-1.52761	-1.81942	-1.55533	-1.72798
1.187	-1.7783	-1.53589	-1.52273	-1.81886	-1.55316	-1.72577
1.188	-1.77457	-1.53209	-1.51786	-1.81788	-1.55086	-1.72334
1.189	-1.77079	-1.52808	-1.51323	-1.81652	-1.54842	-1.72068
1.19	-1.76683	-1.5239	-1.50906	-1.81484	-1.54572	-1.7178
1.191	-1.76256	-1.51954	-1.50535	-1.81289	-1.54265	-1.71462
1.192	-1.7578	-1.51506	-1.5018	-1.81055	-1.53913	-1.71103
1.193	-1.75251	-1.51054	-1.49798	-1.80781	-1.53524	-1.70696
1.194	-1.74693	-1.50606	-1.49362	-1.8049	-1.53117	-1.70246
1.195	-1.74126	-1.50148	-1.48861	-1.80208	-1.52706	-1.69751
1.196	-1.73564	-1.49659	-1.483	-1.79935	-1.52289	-1.69214
1.197	-1.73004	-1.49135	-1.47708	-1.79655	-1.51856	-1.68654
1.198	-1.72433	-1.48586	-1.47118	-1.79358	-1.51403	-1.68096
1.199	-1.71838	-1.48019	-1.46538	-1.79048	-1.50931	-1.67552
1.2	-1.71216	-1.47458	-1.45954	-1.78733	-1.50439	-1.67014
1.201	-1.70585	-1.46929	-1.45345	-1.78422	-1.49923	-1.66466
1.202	-1.69967	-1.4645	-1.44708	-1.78129	-1.49379	-1.65907
1.203	-1.6937	-1.46023	-1.44056	-1.77857	-1.48814	-1.65352
1.204	-1.68793	-1.45636	-1.4341	-1.77594	-1.48236	-1.6481
1.205	-1.68226	-1.45264	-1.42786	-1.77323	-1.47656	-1.64268
1.206	-1.67668	-1.44895	-1.42193	-1.77026	-1.47084	-1.63717
1.207	-1.6712	-1.4452	-1.41618	-1.76692	-1.46537	-1.63152
1.208	-1.66572	-1.44121	-1.41047	-1.76319	-1.46026	-1.62566
1.209	-1.66011	-1.43683	-1.40481	-1.75915	-1.45542	-1.61964
1.21	-1.65432	-1.43213	-1.3993	-1.75491	-1.45062	-1.61363
1.211	-1.64837	-1.4273	-1.39412	-1.7506	-1.4457	-1.60771
1.212	-1.64226	-1.42242	-1.3894	-1.74625	-1.44062	-1.60184
1.213	-1.63599	-1.41748	-1.385	-1.74176	-1.43541	-1.59606
1.214	-1.62975	-1.41239	-1.38056	-1.73696	-1.43012	-1.59042
1.215	-1.62374	-1.407	-1.37581	-1.73177	-1.42476	-1.58489
1.216	-1.61791	-1.40122	-1.3706	-1.72624	-1.41941	-1.57936
1.217	-1.61224	-1.39508	-1.36483	-1.72042	-1.41412	-1.57383
1.218	-1.60681	-1.3888	-1.35859	-1.7144	-1.40884	-1.56831
1.219	-1.60158	-1.38268	-1.35209	-1.70826	-1.40338	-1.56281
1.22	-1.5964	-1.37682	-1.34556	-1.70201	-1.39761	-1.55728
1.221	-1.59112	-1.37113	-1.33915	-1.69563	-1.39155	-1.55155
1.222	-1.58568	-1.36538	-1.33303	-1.6891	-1.38532	-1.54545
1.223	-1.58013	-1.3595	-1.32729	-1.68249	-1.37911	-1.53897
1.224	-1.5745	-1.35356	-1.32181	-1.67596	-1.37308	-1.53223
1.225	-1.56876	-1.34763	-1.31649	-1.66962	-1.36727	-1.52543
1.226	-1.5628	-1.3417	-1.31137	-1.66348	-1.36166	-1.51872
1.227	-1.55659	-1.33575	-1.30646	-1.65748	-1.35616	-1.51211
1.228	-1.5502	-1.32983	-1.3016	-1.65157	-1.3507	-1.50552
1.229	-1.54388	-1.324	-1.29673	-1.6458	-1.34525	-1.49889
1.23	-1.53785	-1.31838	-1.29184	-1.64018	-1.33978	-1.49217
1.231	-1.53204	-1.3131	-1.28691	-1.63461	-1.33427	-1.48542
1.232	-1.52626	-1.3081	-1.28189	-1.62903	-1.32874	-1.47877
1.233	-1.52036	-1.3032	-1.27676	-1.62343	-1.32338	-1.4724
1.234	-1.5142	-1.29831	-1.27143	-1.61787	-1.31824	-1.46639
1.235	-1.50777	-1.29331	-1.26588	-1.61246	-1.31323	-1.46067
1.236	-1.50128	-1.28823	-1.26028	-1.60718	-1.30827	-1.45512
1.237	-1.49487	-1.28322	-1.25484	-1.60176	-1.30341	-1.4497
1.238	-1.48855	-1.27835	-1.24958	-1.596	-1.29871	-1.44437
1.239	-1.48229	-1.2736	-1.24451	-1.58996	-1.29405	-1.43906
1.24	-1.47611	-1.26894	-1.23975	-1.58386	-1.2893	-1.43355
1.241	-1.46995	-1.26444	-1.23535	-1.57775	-1.28442	-1.42761
1.242	-1.46382	-1.26008	-1.23124	-1.57159	-1.27951	-1.42121
1.243	-1.45774	-1.2558	-1.22731	-1.56524	-1.2746	-1.41452
1.244	-1.45173	-1.25158	-1.22344	-1.55856	-1.26972	-1.4077
1.245	-1.44574	-1.24746	-1.21956	-1.55165	-1.26483	-1.40082
1.246	-1.43967	-1.24326	-1.2156	-1.54475	-1.25985	-1.39396
1.247	-1.43344	-1.23877	-1.21158	-1.53805	-1.25477	-1.38726
1.248	-1.42723	-1.23392	-1.20748	-1.53162	-1.24962	-1.38084
1.249	-1.4214	-1.22879	-1.20316	-1.5254	-1.24437	-1.37474
1.25	-1.4161	-1.22353	-1.19846	-1.51927	-1.23899	-1.369
1.251	-1.41114	-1.2183	-1.1933	-1.5132	-1.2336	-1.36359
1.252	-1.40608	-1.21326	-1.18787	-1.50722	-1.22838	-1.35839
1.253	-1.40062	-1.20842	-1.18248	-1.5013	-1.22333	-1.35327
1.254	-1.39476	-1.20368	-1.17725	-1.49531	-1.21835	-1.34818
1.255	-1.38866	-1.19887	-1.17215	-1.4892	-1.2134	-1.34306
1.256	-1.38239	-1.19388	-1.1672	-1.48303	-1.20858	-1.33787
1.257	-1.37604	-1.18877	-1.16241	-1.47683	-1.20392	-1.33265
1.258	-1.3697	-1.18377	-1.15773	-1.47058	-1.19935	-1.32741
1.259	-1.36342	-1.17909	-1.15314	-1.46438	-1.19482	-1.32206
1.26	-1.35729	-1.17485	-1.14881	-1.45829	-1.19037	-1.31643
1.261	-1.35134	-1.17093	-1.14484	-1.45232	-1.18608	-1.31057
1.262	-1.34551	-1.16716	-1.14103	-1.44657	-1.18203	-1.30472
1.263	-1.33963	-1.16342	-1.13709	-1.44109	-1.17818	-1.29905
1.264	-1.33368	-1.15956	-1.13283	-1.43582	-1.17435	-1.29358
1.265	-1.32773	-1.15543	-1.12825	-1.43066	-1.17023	-1.28823
1.266	-1.32186	-1.15101	-1.12326	-1.42561	-1.16556	-1.28297
1.267	-1.31604	-1.14631	-1.11772	-1.42068	-1.16034	-1.27782
1.268	-1.31027	-1.14129	-1.11163	-1.41583	-1.15487	-1.27274
1.269	-1.30451	-1.13585	-1.10535	-1.41102	-1.14934	-1.26762
1.27	-1.29882	-1.12995	-1.09926	-1.40621	-1.14375	-1.26231
1.271	-1.29321	-1.12377	-1.09374	-1.40124	-1.13806	-1.25673
1.272	-1.28777	-1.11759	-1.08895	-1.39602	-1.13232	-1.25084
1.273	-1.28249	-1.11154	-1.08474	-1.39056	-1.12658	-1.24477
1.274	-1.27725	-1.10566	-1.08091	-1.38488	-1.12092	-1.23868
1.275	-1.272	-1.09996	-1.07736	-1.37905	-1.11556	-1.23275
1.276	-1.26684	-1.09445	-1.0741	-1.3732	-1.11068	-1.2271
1.277	-1.26176	-1.08926	-1.07106	-1.36735	-1.10621	-1.22178
1.278	-1.25669	-1.0845	-1.0681	-1.3614	-1.10206	-1.21673
1.279	-1.25162	-1.08013	-1.06506	-1.35532	-1.09813	-1.2119
1.28	-1.24667	-1.07604	-1.06186	-1.34931	-1.09428	-1.20736
1.281	-1.24196	-1.07206	-1.05848	-1.34359	-1.09043	-1.20294
1.282	-1.23761	-1.06795	-1.05488	-1.33823	-1.08648	-1.19835
1.283	-1.23367	-1.06359	-1.05111	-1.33322	-1.08241	-1.19344
1.284	-1.22989	-1.05908	-1.0472	-1.32835	-1.07828	-1.18827
1.285	-1.22581	-1.0546	-1.04307	-1.32339	-1.0742	-1.18305
1.286	-1.22112	-1.05017	-1.03861	-1.31836	-1.07015	-1.17792
1.287	-1.21582	-1.04583	-1.03398	-1.31343	-1.066	-1.17295
1.288	-1.21012	-1.04162	-1.02947	-1.30871	-1.06168	-1.16804
1.289	-1.20425	-1.03743	-1.02517	-1.30408	-1.05729	-1.16304
1.29	-1.19834	-1.03309	-1.02094	-1.2993	-1.05293	-1.15784
1.291	-1.19253	-1.02865	-1.01676	-1.29426	-1.04867	-1.15236
1.292	-1.18684	-1.02429	-1.01262	-1.28903	-1.04455	-1.14659
1.293	-1.18126	-1.02011	-1.00855	-1.28376	-1.04054	-1.14066
1.294	-1.17579	-1.01611	-1.00468	-1.27847	-1.03676	-1.13471
1.295	-1.17057	-1.0123	-1.00104	-1.27313	-1.03334	-1.12891
1.296	-1.16575	-1.00862	-0.99744	-1.26778	-1.03026	-1.1234
1.297	-1.1613	-1.00502	-0.99373	-1.26249	-1.02732	-1.11824
1.298	-1.15707	-1.00161	-0.989963	-1.25725	-1.02435	-1.11341
1.299	-1.1529	-0.998451	-0.986339	-1.25204	-1.02121	-1.10889
1.3	-1.14862	-0.995466	-0.982989	-1.2469	-1.01788	-1.10463
1.301	-1.14412	-0.992541	-0.979859	-1.24186	-1.01438	-1.10054
1.302	-1.13924	-0.989542	-0.976737	-1.23689	-1.01071	-1.09657
1.303	-1.1339	-0.98633	-0.973432	-1.23201	-1.00687	-1.09268
1.304	-1.12812	-0.982829	-0.969944	-1.22728	-1.00297	-1.08875
1.305	-1.12212	-0.979033	-0.966415	-1.22275	-0.999151	-1.08474
1.306	-1.11614	-0.974994	-0.962935	-1.21838	-0.9954	-1.08063
1.307	-1.11032	-0.970785	-0.959493	-1.21411	-0.991712	-1.07638
1.308	-1.10478	-0.966442	-0.956058	-1.20985	-0.988158	-1.07214
1.309	-1.09956	-0.96206	-0.952613	-1.20555	-0.984721	-1.06804
1.31	-1.09472	-0.957855	-0.949167	-1.20112	-0.981238	-1.0642
1.311	-1.09033	-0.953893	-0.945698	-1.19654	-0.97757	-1.06063
1.312	-1.08641	-0.949975	-0.942174	-1.19193	-0.973726	-1.05733
1.313	-1.0828	-0.946	-0.938572	-1.18736	-0.969846	-1.05421
1.314	-1.07926	-0.942163	-0.934842	-1.18276	-0.966099	-1.05105
1.315	-1.07564	-0.938708	-0.930933	-1.17809	-0.962557	-1.04769
1.316	-1.07195	-0.935684	-0.926849	-1.17344	-0.959144	-1.04414
1.317	-1.06822	-0.932901	-0.922668	-1.16884	-0.955758	-1.04057
1.318	-1.06441	-0.930079	-0.918464	-1.1643	-0.952364	-1.03719
1.319	-1.06048	-0.927011	-0.914213	-1.15992	-0.948936	-1.03404
1.32	-1.05651	-0.923583	-0.909894	-1.15573	-0.945422	-1.03095
1.321	-1.05256	-0.919714	-0.905623	-1.15169	-0.941788	-1.02772
1.322	-1.04859	-0.915439	-0.901559	-1.14767	-0.938108	-1.02416
1.323	-1.04455	-0.910979	-0.897692	-1.14355	-0.934578	-1.02012
1.324	-1.04043	-0.90657	-0.893786	-1.13922	-0.931376	-1.01559
1.325	-1.03628	-0.902301	-0.889631	-1.13464	-0.928466	-1.01071
1.326	-1.03212	-0.898162	-0.885276	-1.12991	-0.925638	-1.00575
1.327	-1.02786	-0.894062	-0.880948	-1.12518	-0.922704	-1.00093
1.328	-1.02342	-0.889946	-0.876862	-1.12063	-0.919557	-0.996273
1.329	-1.01892	-0.885892	-0.873074	-1.11629	-0.916177	-0.991815
1.33	-1.01452	-0.881892	-0.869562	-1.11202	-0.912677	-0.987635
1.331	-1.01024	-0.877832	-0.866365	-1.10774	-0.909156	-0.983739
1.332	-1.00606	-0.873696	-0.863436	-1.10353	-0.905554	-0.980066
1.333	-1.00191	-0.869501	-0.860631	-1.09944	-0.901776	-0.97657
1.334	-0.997709	-0.865187	-0.857899	-1.09539	-0.897831	-0.973227
1.335	-0.99348	-0.860719	-0.855295	-1.09136	-0.893849	-0.970026
1.336	-0.989367	-0.856199	-0.852876	-1.08724	-0.889977	-0.9669
1.337	-0.98542	-0.851711	-0.850592	-1.08296	-0.886302	-0.963758
1.338	-0.981538	-0.847172	-0.848237	-1.07858	-0.882857	-0.960518
1.339	-0.977659	-0.842479	-0.845483	-1.0743	-0.879635	-0.957074
1.34	-0.973948	-0.837707	-0.842097	-1.07019	-0.876661	-0.953415
1.341	-0.970693	-0.833081	-0.838133	-1.06612	-0.873909	-0.949622
1.342	-0.967933	-0.828747	-0.833837	-1.06196	-0.871204	-0.94571
1.343	-0.965468	-0.824662	-0.82943	-1.0577	-0.868382	-0.941669
1.344	-0.963171	-0.820795	-0.825035	-1.0533	-0.865421	-0.937545
1.345	-0.960898	-0.817299	-0.820747	-1.04871	-0.862388	-0.933406
1.346	-0.958365	-0.8144	-0.816667	-1.04401	-0.859413	-0.929273
1.347	-0.955374	-0.812239	-0.812792	-1.03943	-0.856623	-0.925156
1.348	-0.951934	-0.810821	-0.808975	-1.03516	-0.854004	-0.921149
1.349	-0.948085	-0.81004	-0.80505	-1.03116	-0.85139	-0.917344
1.35	-0.943815	-0.809629	-0.800945	-1.02735	-0.848675	-0.913717
1.351	-0.939243	-0.809234	-0.796726	-1.0237	-0.84592	-0.910225
1.352	-0.934558	-0.808595	-0.792506	-1.02026	-0.843216	-0.906946
1.353	-0.929788	-0.807615	-0.788352	-1.01704	-0.840619	-0.903989
1.354	-0.924938	-0.80632	-0.784485	-1.01396	-0.838137	-0.90123
1.355	-0.920102	-0.804766	-0.781269	-1.01092	-0.835678	-0.898389
1.356	-0.915326	-0.802941	-0.778851	-1.00784	-0.833128	-0.895328
1.357	-0.910603	-0.80081	-0.777165	-1.00461	-0.830519	-0.892066
1.358	-0.906033	-0.798381	-0.776101	-1.00127	-0.828011	-0.888658
1.359	-0.901791	-0.795638	-0.775507	-0.997859	-0.82566	-0.885182
1.36	-0.897957	-0.792587	-0.775212	-0.994335	-0.823348	-0.881757
1.361	-0.894465	-0.789391	-0.77498	-0.990621	-0.820991	-0.878479
1.362	-0.891243	-0.786216	-0.774552	-0.986687	-0.818615	-0.875392
1.363	-0.888233	-0.783111	-0.773819	-0.982583	-0.816204	-0.872518
1.364	-0.885315	-0.780166	-0.772778	-0.978467	-0.813691	-0.869868
1.365	-0.882376	-0.777497	-0.771311	-0.974529	-0.811138	-0.867383
1.366	-0.87946	-0.77513	-0.769072	-0.970908	-0.808655	-0.864936
1.367	-0.876732	-0.773055	-0.765842	-0.967655	-0.806182	-0.862414
1.368	-0.87433	-0.771233	-0.76194	-0.964673	-0.803565	-0.859738
1.369	-0.872197	-0.769606	-0.757927	-0.961758	-0.800741	-0.856861
1.37	-0.870108	-0.768188	-0.754128	-0.958774	-0.79779	-0.853757
1.371	-0.867924	-0.76694	-0.750635	-0.955762	-0.794815	-0.850418
1.372	-0.865688	-0.765636	-0.747485	-0.95282	-0.791793	-0.84691
1.373	-0.863482	-0.76409	-0.744665	-0.949938	-0.788705	-0.843391
1.374	-0.861339	-0.762328	-0.742123	-0.947035	-0.785726	-0.84005
1.375	-0.859195	-0.760429	-0.739882	-0.944092	-0.783033	-0.837032
1.376	-0.856908	-0.75841	-0.738029	-0.941119	-0.780577	-0.83433
1.377	-0.854452	-0.756276	-0.736563	-0.938107	-0.778198	-0.831778
1.378	-0.851901	-0.754031	-0.735352	-0.935089	-0.775751	-0.829159
1.379	-0.84928	-0.751657	-0.734248	-0.932094	-0.773115	-0.826306
1.38	-0.846594	-0.749213	-0.733215	-0.929033	-0.77025	-0.823246
1.381	-0.843949	-0.746832	-0.732202	-0.92576	-0.767211	-0.820212
1.382	-0.841541	-0.744541	-0.731022	-0.922249	-0.764094	-0.81738
1.383	-0.839402	-0.74225	-0.729596	-0.918605	-0.760975	-0.81471
1.384	-0.837293	-0.739865	-0.728012	-0.914853	-0.757866	-0.812093
1.385	-0.834968	-0.737319	-0.726248	-0.910984	-0.754731	-0.809453
1.386	-0.832385	-0.734573	-0.724207	-0.907162	-0.751597	-0.806709
1.387	-0.829547	-0.731551	-0.721936	-0.903564	-0.748587	-0.803823
1.388	-0.826347	-0.728159	-0.719718	-0.900186	-0.745736	-0.800848
1.389	-0.822734	-0.724446	-0.717905	-0.896926	-0.742944	-0.797861
1.39	-0.818855	-0.720566	-0.716582	-0.893669	-0.740188	-0.794853
1.391	-0.814904	-0.716593	-0.715554	-0.890273	-0.73758	-0.791764
1.392	-0.810986	-0.712611	-0.714638	-0.88669	-0.735136	-0.78865
1.393	-0.807144	-0.708862	-0.713731	-0.883057	-0.732709	-0.785674
1.394	-0.803373	-0.705612	-0.712713	-0.879522	-0.730167	-0.782898
1.395	-0.799673	-0.702995	-0.71148	-0.876119	-0.727477	-0.78022
1.396	-0.796078	-0.700985	-0.709977	-0.872904	-0.724657	-0.777551
1.397	-0.792673	-0.699376	-0.708208	-0.869942	-0.721717	-0.774848
1.398	-0.789648	-0.697858	-0.706224	-0.867182	-0.718717	-0.772043
1.399	-0.787193	-0.696246	-0.704146	-0.864527	-0.715841	-0.769117
1.4	-0.785297	-0.694596	-0.702118	-0.861872	-0.713271	-0.766175
1.401	-0.783787	-0.693046	-0.70019	-0.859038	-0.711095	-0.763343
1.402	-0.782472	-0.691633	-0.698332	-0.855888	-0.70932	-0.760691
1.403	-0.781173	-0.690234	-0.696498	-0.852449	-0.707834	-0.758211
1.404	-0.779664	-0.688631	-0.694678	-0.84888	-0.7065	-0.755784
1.405	-0.777745	-0.686665	-0.69285	-0.845377	-0.705243	-0.753272
1.406	-0.775461	-0.684303	-0.69086	-0.842094	-0.703902	-0.750668
1.407	-0.773017	-0.681611	-0.688514	-0.839079	-0.702265	-0.748024
1.408	-0.770471	-0.678684	-0.685827	-0.836266	-0.700332	-0.745351
1.409	-0.767761	-0.675647	-0.683064	-0.833593	-0.698263	-0.742681
1.41	-0.764949	-0.672722	-0.680521	-0.831081	-0.696135	-0.740105
1.411	-0.762218	-0.670068	-0.678309	-0.828719	-0.693958	-0.737745
1.412	-0.759783	-0.667739	-0.676327	-0.826393	-0.691787	-0.735654
1.413	-0.75777	-0.665826	-0.674342	-0.824022	-0.689667	-0.733708
1.414	-0.756114	-0.664329	-0.672189	-0.821619	-0.687591	-0.731797
1.415	-0.754656	-0.663097	-0.669897	-0.819156	-0.685593	-0.73002
1.416	-0.753232	-0.661925	-0.667585	-0.816627	-0.683721	-0.72848
1.417	-0.751647	-0.660522	-0.665371	-0.814171	-0.681893	-0.727012
1.418	-0.749784	-0.658663	-0.663377	-0.81189	-0.679939	-0.725288
1.419	-0.747657	-0.656386	-0.661651	-0.809735	-0.677787	-0.72313
1.42	-0.745308	-0.653972	-0.660069	-0.807624	-0.675498	-0.720636
1.421	-0.742741	-0.651727	-0.658447	-0.805475	-0.673127	-0.718001
1.422	-0.739984	-0.64965	-0.656779	-0.803171	-0.670696	-0.715253
1.423	-0.737173	-0.647513	-0.655219	-0.800602	-0.668215	-0.712269
1.424	-0.734478	-0.645246	-0.653835	-0.797737	-0.665634	-0.709051
1.425	-0.731886	-0.642962	-0.652577	-0.794685	-0.66291	-0.705853
1.426	-0.729237	-0.64076	-0.651416	-0.791612	-0.660096	-0.702881
1.427	-0.726396	-0.638634	-0.65036	-0.788577	-0.657321	-0.700071
1.428	-0.723343	-0.636471	-0.649387	-0.78553	-0.654706	-0.697313
1.429	-0.720314	-0.634149	-0.648403	-0.782472	-0.65228	-0.694669
1.43	-0.717687	-0.631585	-0.647261	-0.779482	-0.649967	-0.692268
1.431	-0.715683	-0.628765	-0.645788	-0.776558	-0.647736	-0.690139
1.432	-0.714325	-0.625766	-0.643853	-0.773599	-0.645743	-0.688261
1.433	-0.713427	-0.622713	-0.641537	-0.770561	-0.64418	-0.686602
1.434	-0.712674	-0.619718	-0.63904	-0.767472	-0.642928	-0.685046
1.435	-0.711832	-0.616788	-0.636488	-0.764358	-0.641586	-0.683478
1.436	-0.710772	-0.61375	-0.633919	-0.761262	-0.639874	-0.681819
1.437	-0.70936	-0.610474	-0.631241	-0.75826	-0.6378	-0.67989
1.438	-0.707503	-0.607033	-0.628374	-0.755374	-0.635514	-0.677544
1.439	-0.705198	-0.603589	-0.625444	-0.752637	-0.633198	-0.674872
1.44	-0.702476	-0.600303	-0.622669	-0.750086	-0.630993	-0.672084
1.441	-0.69943	-0.597301	-0.620169	-0.747585	-0.628961	-0.669299
1.442	-0.696211	-0.594661	-0.617918	-0.744984	-0.627105	-0.666547
1.443	-0.692972	-0.592452	-0.615884	-0.74238	-0.625408	-0.663901
1.444	-0.689898	-0.590711	-0.614083	-0.739941	-0.623846	-0.661467
1.445	-0.6871	-0.589396	-0.612496	-0.737652	-0.622353	-0.659265
1.446	-0.68451	-0.588407	-0.610958	-0.735365	-0.62084	-0.657222
1.447	-0.682052	-0.587609	-0.609143	-0.732971	-0.619206	-0.655286
1.448	-0.679744	-0.586889	-0.606822	-0.730471	-0.617407	-0.653436
1.449	-0.677623	-0.586127	-0.604069	-0.727974	-0.615502	-0.651644
1.45	-0.675741	-0.585171	-0.601162	-0.725625	-0.613544	-0.649912
1.451	-0.674129	-0.583942	-0.598378	-0.723437	-0.611525	-0.648246
1.452	-0.672683	-0.582519	-0.595864	-0.7213	-0.609502	-0.646575
1.453	-0.671192	-0.581044	-0.593667	-0.719211	-0.607549	-0.644756
1.454	-0.669476	-0.579539	-0.591834	-0.717258	-0.60564	-0.642657
1.455	-0.667513	-0.577876	-0.590366	-0.71544	-0.603727	-0.640276
1.456	-0.665337	-0.576024	-0.589153	-0.713653	-0.601837	-0.637772
1.457	-0.662915	-0.57414	-0.588019	-0.711817	-0.60006	-0.635333
1.458	-0.660266	-0.572318	-0.586793	-0.709898	-0.598517	-0.633055
1.459	-0.65753	-0.570553	-0.585366	-0.707764	-0.597233	-0.630925
1.46	-0.654862	-0.568934	-0.583674	-0.705303	-0.59606	-0.628865
1.461	-0.652344	-0.567628	-0.581692	-0.702569	-0.594845	-0.626781
1.462	-0.650049	-0.566706	-0.579498	-0.699665	-0.593581	-0.624636
1.463	-0.648107	-0.56601	-0.577202	-0.696736	-0.592294	-0.622513
1.464	-0.646685	-0.565251	-0.574865	-0.694025	-0.590923	-0.620521
1.465	-0.64585	-0.564229	-0.572546	-0.691746	-0.589313	-0.61871
1.466	-0.645466	-0.562857	-0.570331	-0.689923	-0.587372	-0.617068
1.467	-0.645329	-0.561161	-0.568291	-0.688384	-0.585249	-0.615557
1.468	-0.645285	-0.559299	-0.566454	-0.686886	-0.583175	-0.614173
1.469	-0.645199	-0.557427	-0.564768	-0.685278	-0.58125	-0.612896
1.47	-0.644989	-0.555596	-0.563053	-0.683562	-0.579435	-0.61158
1.471	-0.644571	-0.553812	-0.561095	-0.681781	-0.577619	-0.610045
1.472	-0.643771	-0.55211	-0.558869	-0.67993	-0.575738	-0.608228
1.473	-0.642489	-0.550585	-0.556554	-0.678031	-0.573821	-0.606176
1.474	-0.640736	-0.549369	-0.554378	-0.676116	-0.571934	-0.604026
1.475	-0.63847	-0.548544	-0.552458	-0.674126	-0.570127	-0.601928
1.476	-0.635672	-0.547989	-0.550791	-0.671979	-0.568362	-0.599916
1.477	-0.632579	-0.547432	-0.549414	-0.669703	-0.566602	-0.597973
1.478	-0.629588	-0.546789	-0.548392	-0.667394	-0.564893	-0.596143
1.479	-0.626949	-0.54621	-0.547601	-0.665079	-0.563271	-0.594466
1.48	-0.624717	-0.54575	-0.546822	-0.662705	-0.561783	-0.592905
1.481	-0.622843	-0.54526	-0.54603	-0.660261	-0.560517	-0.591345
1.482	-0.621149	-0.54461	-0.545298	-0.657833	-0.559432	-0.589703
1.483	-0.619475	-0.543766	-0.544598	-0.655543	-0.558354	-0.588028
1.484	-0.617777	-0.542757	-0.543797	-0.653493	-0.557158	-0.586355
1.485	-0.616065	-0.541599	-0.542681	-0.651732	-0.555858	-0.584624
1.486	-0.614397	-0.540159	-0.541164	-0.650213	-0.554483	-0.582773
1.487	-0.612769	-0.538298	-0.539361	-0.648835	-0.552985	-0.580748
1.488	-0.61108	-0.536102	-0.537352	-0.647501	-0.551381	-0.578549
1.489	-0.609311	-0.533754	-0.535171	-0.646109	-0.549746	-0.57628
1.49	-0.607588	-0.531385	-0.532921	-0.644513	-0.548075	-0.574055
1.491	-0.606019	-0.529161	-0.530679	-0.642588	-0.546396	-0.571898
1.492	-0.604603	-0.527289	-0.528396	-0.640376	-0.544803	-0.569795
1.493	-0.603346	-0.52586	-0.525944	-0.638036	-0.543288	-0.567785
1.494	-0.602244	-0.524838	-0.523209	-0.635652	-0.541746	-0.565887
1.495	-0.601252	-0.524158	-0.520184	-0.633302	-0.540085	-0.56404
1.496	-0.600375	-0.523757	-0.517022	-0.631139	-0.538264	-0.562215
1.497	-0.599593	-0.523609	-0.513901	-0.629196	-0.536286	-0.560423
1.498	-0.598744	-0.523738	-0.510916	-0.62728	-0.53417	-0.558679
1.499	-0.597638	-0.524133	-0.508156	-0.625242	-0.531981	-0.557036
1.5	-0.596175	-0.524623	-0.505715	-0.623165	-0.529842	-0.555502
1.501	-0.594384	-0.524877	-0.503632	-0.621235	-0.527862	-0.553973
1.502	-0.592374	-0.524662	-0.501964	-0.619577	-0.526091	-0.552398
1.503	-0.590201	-0.523983	-0.500825	-0.618177	-0.524574	-0.550853
1.504	-0.587838	-0.522948	-0.500224	-0.616878	-0.523393	-0.549384
1.505	-0.585255	-0.521601	-0.499998	-0.615458	-0.522558	-0.547999
1.506	-0.582497	-0.519913	-0.499994	-0.613762	-0.521881	-0.546729
1.507	-0.57971	-0.517947	-0.500106	-0.611805	-0.521076	-0.545569
1.508	-0.577095	-0.515885	-0.500252	-0.609703	-0.519996	-0.54449
1.509	-0.574761	-0.513823	-0.500416	-0.607568	-0.518716	-0.543445
1.51	-0.572657	-0.511723	-0.500508	-0.605506	-0.517377	-0.542338
1.511	-0.570682	-0.509547	-0.500412	-0.603612	-0.516026	-0.541119
1.512	-0.568748	-0.507297	-0.500157	-0.601954	-0.514605	-0.53978
1.513	-0.566791	-0.505042	-0.499741	-0.600567	-0.513111	-0.538311
1.514	-0.564867	-0.502954	-0.499111	-0.59941	-0.51166	-0.536711
1.515	-0.563042	-0.501105	-0.498274	-0.598376	-0.510292	-0.534946
1.516	-0.561277	-0.499354	-0.497147	-0.597382	-0.508898	-0.533034
1.517	-0.559605	-0.497576	-0.495546	-0.596417	-0.507408	-0.53109
1.518	-0.558212	-0.495794	-0.493403	-0.59544	-0.505773	-0.529132
1.519	-0.557264	-0.494003	-0.490871	-0.594293	-0.503949	-0.527107
1.52	-0.556767	-0.492184	-0.488239	-0.592816	-0.502028	-0.525108
1.521	-0.556555	-0.490439	-0.48572	-0.591008	-0.500179	-0.523291
1.522	-0.556349	-0.488835	-0.48335	-0.588982	-0.498534	-0.521664
1.523	-0.555894	-0.487218	-0.481103	-0.586824	-0.497197	-0.520192
1.524	-0.555122	-0.485365	-0.478999	-0.584619	-0.496155	-0.518902
1.525	-0.55407	-0.483193	-0.477119	-0.582539	-0.495239	-0.517759
1.526	-0.552645	-0.480895	-0.475551	-0.580723	-0.494274	-0.516718
1.527	-0.550661	-0.478729	-0.474322	-0.579205	-0.493109	-0.515775
1.528	-0.548072	-0.476752	-0.47339	-0.577946	-0.491632	-0.514862
1.529	-0.54506	-0.474972	-0.472642	-0.576772	-0.489869	-0.513935
1.53	-0.541957	-0.473453	-0.471871	-0.575462	-0.487907	-0.51301
1.531	-0.539052	-0.472067	-0.47077	-0.573998	-0.485756	-0.512046
1.532	-0.536452	-0.470508	-0.469136	-0.572549	-0.48342	-0.510994
1.533	-0.53413	-0.468633	-0.467001	-0.571223	-0.480984	-0.509804
1.534	-0.53206	-0.466474	-0.464499	-0.569957	-0.478623	-0.508428
1.535	-0.530268	-0.464074	-0.461765	-0.568615	-0.476565	-0.506872
1.536	-0.528768	-0.461557	-0.458924	-0.567121	-0.474918	-0.505105
1.537	-0.52751	-0.459043	-0.45609	-0.56546	-0.47354	-0.503
1.538	-0.526385	-0.456483	-0.45341	-0.563647	-0.472242	-0.500505
1.539	-0.525223	-0.453942	-0.450973	-0.561638	-0.471026	-0.497783
1.54	-0.52382	-0.451693	-0.448716	-0.559367	-0.469992	-0.495125
1.541	-0.522129	-0.449918	-0.446561	-0.556936	-0.469104	-0.492768
1.542	-0.520329	-0.448667	-0.444555	-0.55452	-0.468248	-0.49084
1.543	-0.518575	-0.447899	-0.442751	-0.552146	-0.467415	-0.489322
1.544	-0.516789	-0.447496	-0.441141	-0.549787	-0.466726	-0.488112
1.545	-0.514878	-0.447381	-0.439774	-0.547433	-0.466297	-0.487192
1.546	-0.512998	-0.44756	-0.438792	-0.545014	-0.466072	-0.486541
1.547	-0.51145	-0.447979	-0.438333	-0.542613	-0.465761	-0.485965
1.548	-0.510468	-0.448443	-0.43843	-0.540465	-0.464997	-0.485223
1.549	-0.510055	-0.448717	-0.438953	-0.538645	-0.463614	-0.484289
1.55	-0.509974	-0.448602	-0.43963	-0.5371	-0.461784	-0.483302
1.551	-0.509909	-0.448023	-0.440159	-0.535869	-0.459764	-0.482307
1.552	-0.509544	-0.447055	-0.440297	-0.534982	-0.457668	-0.481271
1.553	-0.508666	-0.445791	-0.439962	-0.534303	-0.455614	-0.48017
1.554	-0.507279	-0.444287	-0.43928	-0.533637	-0.453755	-0.47899
1.555	-0.50558	-0.442575	-0.438445	-0.532865	-0.45212	-0.477765
1.556	-0.503849	-0.440708	-0.43765	-0.531962	-0.450706	-0.476525
1.557	-0.502227	-0.43882	-0.437083	-0.530965	-0.449572	-0.4752
1.558	-0.500653	-0.437078	-0.436796	-0.52997	-0.448807	-0.473718
1.559	-0.499077	-0.435622	-0.436707	-0.529044	-0.448498	-0.472092
1.56	-0.497524	-0.434499	-0.436694	-0.528079	-0.448591	-0.470344
1.561	-0.496004	-0.433627	-0.43671	-0.52689	-0.448854	-0.468532
1.562	-0.494521	-0.432956	-0.43678	-0.525415	-0.449045	-0.466804
1.563	-0.493036	-0.432553	-0.436754	-0.523741	-0.448936	-0.465322
1.564	-0.491472	-0.432459	-0.436394	-0.522021	-0.448349	-0.4641
1.565	-0.489928	-0.432599	-0.435689	-0.520405	-0.447305	-0.462963
1.566	-0.488582	-0.432854	-0.434774	-0.518958	-0.445966	-0.461808
1.567	-0.48736	-0.433106	-0.433711	-0.517646	-0.444397	-0.460733
1.568	-0.48602	-0.433185	-0.432481	-0.516494	-0.442554	-0.459778
1.569	-0.48448	-0.432874	-0.431026	-0.515637	-0.440455	-0.458827
1.57	-0.482877	-0.432059	-0.429375	-0.515093	-0.438236	-0.457746
1.571	-0.481367	-0.43079	-0.42769	-0.514698	-0.436098	-0.456452
1.572	-0.479941	-0.429217	-0.426111	-0.514235	-0.434193	-0.45487
1.573	-0.478442	-0.427631	-0.424747	-0.513514	-0.432545	-0.452982
1.574	-0.476753	-0.426312	-0.423702	-0.512387	-0.431126	-0.450916
1.575	-0.474882	-0.425305	-0.422965	-0.510785	-0.429933	-0.44886
1.576	-0.472863	-0.424524	-0.422394	-0.508808	-0.428933	-0.446949
1.577	-0.470791	-0.42392	-0.421774	-0.506709	-0.428062	-0.44529
1.578	-0.468867	-0.423551	-0.420876	-0.504672	-0.427281	-0.443951
1.579	-0.467193	-0.423608	-0.419685	-0.502681	-0.426485	-0.442925
1.58	-0.465706	-0.424217	-0.418471	-0.500673	-0.425511	-0.442081
1.581	-0.464336	-0.425206	-0.417528	-0.498713	-0.424334	-0.441248
1.582	-0.463076	-0.426216	-0.416926	-0.496914	-0.423046	-0.44036
1.583	-0.461946	-0.426878	-0.416545	-0.495308	-0.421685	-0.439435
1.584	-0.460981	-0.426879	-0.416279	-0.493866	-0.420241	-0.438536
1.585	-0.460221	-0.426067	-0.41612	-0.492588	-0.418728	-0.437729
1.586	-0.459668	-0.424536	-0.416132	-0.491452	-0.417201	-0.436979
1.587	-0.459257	-0.422514	-0.416339	-0.490289	-0.415713	-0.436173
1.588	-0.458867	-0.420222	-0.416595	-0.488917	-0.414241	-0.435227
1.589	-0.458368	-0.417849	-0.416679	-0.487327	-0.412695	-0.434106
1.59	-0.457655	-0.415571	-0.416474	-0.485598	-0.411075	-0.432849
1.591	-0.456704	-0.413546	-0.41589	-0.483761	-0.409497	-0.431583
1.592	-0.455587	-0.411905	-0.414804	-0.481859	-0.408081	-0.430308
1.593	-0.454394	-0.410718	-0.413258	-0.480021	-0.406917	-0.428926
1.594	-0.453182	-0.40995	-0.411517	-0.478345	-0.406029	-0.427494
1.595	-0.452035	-0.409518	-0.409773	-0.476842	-0.405346	-0.426105
1.596	-0.451016	-0.409272	-0.407992	-0.47552	-0.404773	-0.424768
1.597	-0.450102	-0.409015	-0.406084	-0.474336	-0.404278	-0.423548
1.598	-0.449258	-0.408662	-0.404044	-0.473154	-0.403851	-0.42252
1.599	-0.448454	-0.408239	-0.401942	-0.471939	-0.403418	-0.421716
1.6	-0.447675	-0.407729	-0.399805	-0.470761	-0.402843	-0.421138
1.601	-0.446936	-0.407112	-0.397574	-0.469594	-0.402079	-0.420698
1.602	-0.446234	-0.406448	-0.395259	-0.468388	-0.401266	-0.420368
1.603	-0.445584	-0.405781	-0.392956	-0.467248	-0.400581	-0.420232
1.604	-0.444962	-0.405032	-0.390705	-0.466319	-0.400085	-0.420209
1.605	-0.444244	-0.404087	-0.388514	-0.465563	-0.399717	-0.420047
1.606	-0.443302	-0.402886	-0.386441	-0.464826	-0.399338	-0.419576
1.607	-0.442118	-0.40142	-0.384614	-0.463976	-0.398809	-0.418838
1.608	-0.440771	-0.399737	-0.38322	-0.462975	-0.398096	-0.417987
1.609	-0.439328	-0.397863	-0.382408	-0.461914	-0.397224	-0.417062
1.61	-0.437788	-0.395716	-0.38215	-0.460876	-0.396212	-0.415978
1.611	-0.436208	-0.393286	-0.382204	-0.459812	-0.395126	-0.414697
1.612	-0.434742	-0.390749	-0.38229	-0.45867	-0.39402	-0.413279
1.613	-0.433477	-0.38835	-0.382292	-0.457538	-0.392914	-0.411839
1.614	-0.432365	-0.386283	-0.382226	-0.456506	-0.391861	-0.410418
1.615	-0.43138	-0.384613	-0.382052	-0.455544	-0.390963	-0.408972
1.616	-0.430599	-0.383304	-0.381599	-0.454658	-0.390321	-0.407537
1.617	-0.430084	-0.382357	-0.380785	-0.453877	-0.389841	-0.406241
1.618	-0.429817	-0.381788	-0.37975	-0.453093	-0.389261	-0.405201
1.619	-0.429684	-0.381491	-0.378716	-0.452176	-0.388479	-0.404432
1.62	-0.42954	-0.381259	-0.377833	-0.451218	-0.38766	-0.403779
1.621	-0.42932	-0.380897	-0.377113	-0.450472	-0.386974	-0.403063
1.622	-0.42907	-0.380258	-0.376521	-0.450032	-0.386371	-0.402272
1.623	-0.428869	-0.37935	-0.376104	-0.449715	-0.385721	-0.401438
1.624	-0.428622	-0.378386	-0.375886	-0.449276	-0.385	-0.400508
1.625	-0.428096	-0.377621	-0.37575	-0.448628	-0.384152	-0.399494
1.626	-0.427142	-0.377138	-0.375558	-0.44777	-0.383113	-0.398402
1.627	-0.425706	-0.376725	-0.375292	-0.446636	-0.381969	-0.397111
1.628	-0.423837	-0.376018	-0.37493	-0.445158	-0.38085	-0.395583
1.629	-0.421696	-0.374902	-0.374347	-0.443392	-0.379783	-0.394007
1.63	-0.419566	-0.373559	-0.373474	-0.441455	-0.378673	-0.392667
1.631	-0.417773	-0.372225	-0.372364	-0.439395	-0.377391	-0.391695
1.632	-0.416448	-0.371122	-0.371107	-0.437255	-0.375892	-0.390978
1.633	-0.415498	-0.370311	-0.369777	-0.43518	-0.374285	-0.390315
1.634	-0.414746	-0.369622	-0.368405	-0.433306	-0.372744	-0.389595
1.635	-0.413966	-0.368891	-0.367048	-0.431625	-0.371302	-0.388813
1.636	-0.413041	-0.368054	-0.365744	-0.430032	-0.369844	-0.387959
1.637	-0.412043	-0.367139	-0.36442	-0.428451	-0.368308	-0.386996
1.638	-0.410955	-0.36633	-0.362978	-0.426914	-0.366777	-0.385906
1.639	-0.4096	-0.365814	-0.361397	-0.425446	-0.365284	-0.384605
1.64	-0.407905	-0.36557	-0.359753	-0.423936	-0.363758	-0.382968
1.641	-0.405939	-0.36548	-0.358238	-0.42229	-0.362241	-0.381003
1.642	-0.403808	-0.365483	-0.357071	-0.420553	-0.360939	-0.378802
1.643	-0.401637	-0.365501	-0.356356	-0.418825	-0.360013	-0.376452
1.644	-0.399631	-0.365433	-0.35602	-0.417176	-0.359438	-0.374095
1.645	-0.398031	-0.365231	-0.35579	-0.415611	-0.359031	-0.371875
1.646	-0.396888	-0.364881	-0.355331	-0.414114	-0.358574	-0.369903
1.647	-0.396059	-0.364405	-0.354473	-0.412686	-0.357961	-0.368297
1.648	-0.395516	-0.363848	-0.35329	-0.411309	-0.357245	-0.36711
1.649	-0.39541	-0.363241	-0.351996	-0.409953	-0.356524	-0.366323
1.65	-0.395772	-0.362624	-0.350763	-0.40867	-0.355836	-0.365868
1.651	-0.396395	-0.361928	-0.349657	-0.407589	-0.35516	-0.36562
1.652	-0.397088	-0.360983	-0.348723	-0.406738	-0.354469	-0.365467
1.653	-0.397773	-0.35977	-0.348034	-0.406055	-0.353765	-0.365408
1.654	-0.398334	-0.358555	-0.347658	-0.405424	-0.35312	-0.36547
1.655	-0.398595	-0.357623	-0.347616	-0.404648	-0.35264	-0.365563
1.656	-0.398459	-0.357052	-0.347844	-0.403643	-0.352314	-0.365535
1.657	-0.397918	-0.356839	-0.34823	-0.402554	-0.352035	-0.365305
1.658	-0.397003	-0.356926	-0.348661	-0.401549	-0.351672	-0.36485
1.659	-0.395765	-0.357127	-0.349	-0.400714	-0.351054	-0.364182
1.66	-0.394318	-0.35727	-0.349169	-0.40011	-0.350048	-0.363386
1.661	-0.392824	-0.357361	-0.349188	-0.399739	-0.348732	-0.362553
1.662	-0.39136	-0.357448	-0.349085	-0.399488	-0.347368	-0.361673
1.663	-0.389852	-0.357427	-0.348839	-0.399222	-0.346103	-0.360731
1.664	-0.388265	-0.357065	-0.348447	-0.398865	-0.344867	-0.359767
1.665	-0.38679	-0.356208	-0.348019	-0.398373	-0.343674	-0.358887
1.666	-0.385643	-0.354966	-0.347665	-0.39767	-0.342709	-0.358224
1.667	-0.384817	-0.353517	-0.34733	-0.396708	-0.34209	-0.357793
1.668	-0.384173	-0.351836	-0.346888	-0.395468	-0.34175	-0.357558
1.669	-0.383609	-0.349894	-0.346277	-0.393935	-0.341577	-0.357573
1.67	-0.383071	-0.34782	-0.345494	-0.392239	-0.341571	-0.357806
1.671	-0.382528	-0.345726	-0.344598	-0.390626	-0.34176	-0.357979
1.672	-0.381952	-0.343636	-0.34371	-0.389234	-0.341988	-0.357758
1.673	-0.381312	-0.341602	-0.342938	-0.388002	-0.341943	-0.357029
1.674	-0.380579	-0.339721	-0.342289	-0.386816	-0.34145	-0.355929
1.675	-0.379751	-0.338083	-0.341694	-0.385677	-0.340608	-0.354647
1.676	-0.378841	-0.336789	-0.341085	-0.384588	-0.339613	-0.35334
1.677	-0.377829	-0.335867	-0.340428	-0.383432	-0.338593	-0.352145
1.678	-0.376716	-0.335193	-0.33978	-0.382164	-0.337576	-0.351121
1.679	-0.375568	-0.334601	-0.33921	-0.380912	-0.336535	-0.350224
1.68	-0.374458	-0.334011	-0.338651	-0.379789	-0.335406	-0.349332
1.681	-0.373416	-0.333406	-0.338052	-0.378809	-0.334123	-0.34838
1.682	-0.372418	-0.332763	-0.337543	-0.377941	-0.332727	-0.347444
1.683	-0.371451	-0.332002	-0.337207	-0.377112	-0.331295	-0.346588
1.684	-0.370586	-0.331019	-0.336966	-0.376227	-0.329836	-0.345737
1.685	-0.369934	-0.32973	-0.336697	-0.375204	-0.328371	-0.344814
1.686	-0.369544	-0.328074	-0.336244	-0.374027	-0.326961	-0.343818
1.687	-0.369363	-0.326039	-0.335476	-0.372868	-0.325665	-0.342743
1.688	-0.369186	-0.323764	-0.334424	-0.371962	-0.324521	-0.341592
1.689	-0.368768	-0.321539	-0.333258	-0.371283	-0.32358	-0.340349
1.69	-0.36801	-0.319683	-0.332157	-0.370594	-0.32294	-0.338991
1.691	-0.366899	-0.318458	-0.331184	-0.369729	-0.322683	-0.337604
1.692	-0.365378	-0.317954	-0.330277	-0.368692	-0.322697	-0.336282
1.693	-0.363453	-0.318111	-0.329444	-0.367639	-0.32277	-0.335007
1.694	-0.361355	-0.318795	-0.328792	-0.366751	-0.322769	-0.333741
1.695	-0.359402	-0.319749	-0.328366	-0.366007	-0.32257	-0.332452
1.696	-0.357807	-0.320718	-0.328118	-0.365232	-0.322128	-0.331109
1.697	-0.356656	-0.32163	-0.327873	-0.364339	-0.321532	-0.329831
1.698	-0.355864	-0.322502	-0.327358	-0.363408	-0.320815	-0.328877
1.699	-0.355275	-0.323311	-0.32644	-0.362564	-0.31994	-0.328346
1.7	-0.354876	-0.323932	-0.325251	-0.361881	-0.318984	-0.328129
1.701	-0.354683	-0.324217	-0.324029	-0.361376	-0.31811	-0.328137
1.702	-0.354568	-0.324111	-0.322917	-0.360982	-0.317328	-0.328294
1.703	-0.354405	-0.323567	-0.321888	-0.360601	-0.316491	-0.328474
1.704	-0.354155	-0.322587	-0.320835	-0.360225	-0.31554	-0.328595
1.705	-0.353785	-0.32133	-0.319753	-0.359901	-0.314648	-0.328599
1.706	-0.353255	-0.319963	-0.31879	-0.359671	-0.314058	-0.328396
1.707	-0.352544	-0.318569	-0.31808	-0.359531	-0.313834	-0.327946
1.708	-0.351592	-0.317207	-0.317628	-0.359413	-0.313865	-0.327242
1.709	-0.350291	-0.315867	-0.317383	-0.35928	-0.314013	-0.326274
1.71	-0.348596	-0.314509	-0.317288	-0.359077	-0.314152	-0.325115
1.711	-0.346576	-0.313204	-0.317277	-0.358637	-0.314171	-0.323893
1.712	-0.344367	-0.312072	-0.31731	-0.357863	-0.314011	-0.322741
1.713	-0.342182	-0.311067	-0.317375	-0.356878	-0.313659	-0.321796
1.714	-0.340257	-0.31006	-0.317389	-0.355888	-0.313091	-0.321127
1.715	-0.338684	-0.309029	-0.317151	-0.355055	-0.312273	-0.320681
1.716	-0.337407	-0.30803	-0.316522	-0.354418	-0.31126	-0.320397
1.717	-0.336334	-0.30707	-0.315557	-0.353889	-0.310188	-0.320263
1.718	-0.335419	-0.306071	-0.314388	-0.35342	-0.309171	-0.320207
1.719	-0.334702	-0.304968	-0.313099	-0.353079	-0.308225	-0.320106
1.72	-0.334181	-0.303754	-0.311774	-0.352905	-0.307318	-0.319849
1.721	-0.33375	-0.302444	-0.310632	-0.352874	-0.306432	-0.319317
1.722	-0.333345	-0.301122	-0.3099	-0.352915	-0.305528	-0.318458
1.723	-0.333	-0.299854	-0.309597	-0.352937	-0.304556	-0.317306
1.724	-0.332785	-0.298623	-0.309557	-0.352907	-0.30356	-0.315843
1.725	-0.332686	-0.297535	-0.309601	-0.352813	-0.302698	-0.314094
1.726	-0.332655	-0.296777	-0.309653	-0.352558	-0.302076	-0.312228
1.727	-0.332657	-0.296385	-0.309748	-0.352072	-0.30157	-0.310448
1.728	-0.332602	-0.296333	-0.309857	-0.351424	-0.300981	-0.308908
1.729	-0.332444	-0.296602	-0.309818	-0.350731	-0.300204	-0.307655
1.73	-0.332262	-0.29708	-0.309527	-0.350087	-0.299222	-0.306592
1.731	-0.332027	-0.29763	-0.309046	-0.349554	-0.298089	-0.30555
1.732	-0.331499	-0.298184	-0.308555	-0.349059	-0.296899	-0.304509
1.733	-0.330582	-0.298681	-0.308275	-0.348434	-0.295764	-0.303626
1.734	-0.329448	-0.29901	-0.308318	-0.34756	-0.294774	-0.302989
1.735	-0.328271	-0.298984	-0.308575	-0.346427	-0.293915	-0.302576
1.736	-0.327114	-0.298478	-0.308793	-0.345119	-0.293092	-0.302416
1.737	-0.326004	-0.297585	-0.308799	-0.343737	-0.292213	-0.302519
1.738	-0.32502	-0.296479	-0.308598	-0.342294	-0.291252	-0.302722
1.739	-0.324262	-0.295267	-0.308204	-0.340748	-0.290292	-0.30276
1.74	-0.323751	-0.294049	-0.307566	-0.339173	-0.289455	-0.302471
1.741	-0.323429	-0.292922	-0.306709	-0.337754	-0.28879	-0.301861
1.742	-0.32321	-0.291946	-0.305719	-0.336591	-0.288323	-0.301012
1.743	-0.32308	-0.291137	-0.304647	-0.335629	-0.288018	-0.300083
1.744	-0.323115	-0.290498	-0.303455	-0.334743	-0.287708	-0.299228
1.745	-0.323293	-0.290076	-0.302061	-0.33381	-0.287277	-0.298438
1.746	-0.323458	-0.289879	-0.300517	-0.332825	-0.286691	-0.29765
1.747	-0.323521	-0.289812	-0.298962	-0.331934	-0.285927	-0.296856
1.748	-0.32348	-0.289765	-0.297452	-0.331289	-0.285084	-0.29604
1.749	-0.323323	-0.28957	-0.295893	-0.330905	-0.284367	-0.295205
1.75	-0.323009	-0.289022	-0.29404	-0.330663	-0.283889	-0.29442
1.751	-0.322541	-0.288108	-0.291689	-0.330414	-0.283567	-0.293732
1.752	-0.322009	-0.287012	-0.289014	-0.330039	-0.283275	-0.293112
1.753	-0.321525	-0.285984	-0.286512	-0.329461	-0.283029	-0.292495
1.754	-0.321094	-0.285293	-0.284557	-0.328662	-0.282846	-0.291868
1.755	-0.320593	-0.285138	-0.283191	-0.32769	-0.282628	-0.291312
1.756	-0.31986	-0.285623	-0.282227	-0.326629	-0.282289	-0.290898
1.757	-0.318826	-0.286681	-0.281408	-0.3256	-0.281877	-0.29062
1.758	-0.31763	-0.287976	-0.280564	-0.324732	-0.281466	-0.290396
1.759	-0.316501	-0.289108	-0.279704	-0.324084	-0.28105	-0.290011
1.76	-0.315545	-0.289828	-0.27896	-0.323655	-0.280684	-0.28924
1.761	-0.314794	-0.290099	-0.278468	-0.323358	-0.28044	-0.288072
1.762	-0.314254	-0.29011	-0.278269	-0.323035	-0.280231	-0.286676
1.763	-0.313849	-0.290093	-0.278315	-0.322649	-0.279928	-0.28525
1.764	-0.31356	-0.290127	-0.278429	-0.322239	-0.279463	-0.283948
1.765	-0.313475	-0.290221	-0.27832	-0.321715	-0.278726	-0.282882
1.766	-0.313585	-0.29031	-0.27773	-0.320945	-0.27761	-0.282107
1.767	-0.313799	-0.290207	-0.276577	-0.319936	-0.276184	-0.281585
1.768	-0.314062	-0.289778	-0.275021	-0.318791	-0.274647	-0.28122
1.769	-0.314274	-0.288971	-0.273445	-0.31757	-0.273188	-0.280901
1.77	-0.314293	-0.287746	-0.27219	-0.316298	-0.272	-0.280544
1.771	-0.314041	-0.286197	-0.271302	-0.315092	-0.271189	-0.280082
1.772	-0.31339	-0.284551	-0.270693	-0.314097	-0.270688	-0.27951
1.773	-0.312165	-0.282913	-0.270368	-0.313334	-0.270387	-0.278914
1.774	-0.310417	-0.281239	-0.270289	-0.312752	-0.270232	-0.278347
1.775	-0.30842	-0.279602	-0.270288	-0.312366	-0.270152	-0.277768
1.776	-0.30643	-0.278261	-0.270305	-0.312223	-0.269989	-0.277183
1.777	-0.304648	-0.277456	-0.270457	-0.312263	-0.269609	-0.276642
1.778	-0.303258	-0.277261	-0.270814	-0.312384	-0.269019	-0.276074
1.779	-0.302369	-0.277631	-0.271355	-0.312548	-0.268332	-0.275344
1.78	-0.302011	-0.278497	-0.272013	-0.312758	-0.267621	-0.274497
1.781	-0.302163	-0.279703	-0.272644	-0.312979	-0.266938	-0.273717
1.782	-0.302667	-0.280925	-0.273131	-0.313086	-0.266358	-0.273116
1.783	-0.303252	-0.281892	-0.273464	-0.312928	-0.265808	-0.27269
1.784	-0.303714	-0.282591	-0.273587	-0.312441	-0.265067	-0.272359
1.785	-0.304011	-0.283121	-0.273309	-0.311652	-0.264042	-0.272028
1.786	-0.304164	-0.283539	-0.272518	-0.31059	-0.262867	-0.271693
1.787	-0.304162	-0.283823	-0.271308	-0.309285	-0.261693	-0.271408
1.788	-0.303973	-0.283827	-0.269796	-0.307826	-0.260578	-0.271121
1.789	-0.303541	-0.283403	-0.268023	-0.30626	-0.259521	-0.270647
1.79	-0.302772	-0.282492	-0.266058	-0.304548	-0.25845	-0.269892
1.791	-0.301682	-0.281113	-0.264083	-0.3027	-0.257309	-0.26896
1.792	-0.300451	-0.279492	-0.262312	-0.300829	-0.256163	-0.268012
1.793	-0.29921	-0.277945	-0.260854	-0.299121	-0.255101	-0.267135
1.794	-0.297961	-0.276608	-0.259723	-0.297668	-0.254164	-0.266341
1.795	-0.296738	-0.275482	-0.25892	-0.296392	-0.253396	-0.265605
1.796	-0.29563	-0.274516	-0.258479	-0.295214	-0.252877	-0.264914
1.797	-0.294698	-0.273685	-0.258367	-0.294188	-0.252668	-0.264286
1.798	-0.293989	-0.273076	-0.258395	-0.293455	-0.252737	-0.2637
1.799	-0.293506	-0.272708	-0.258339	-0.293109	-0.252993	-0.263083
1.8	-0.29313	-0.272409	-0.258095	-0.293176	-0.253329	-0.262395
1.801	-0.292762	-0.272048	-0.257699	-0.293656	-0.253604	-0.261652
1.802	-0.292517	-0.271646	-0.257292	-0.294502	-0.25369	-0.260892
1.803	-0.292548	-0.27118	-0.257018	-0.295586	-0.253555	-0.260204
1.804	-0.292769	-0.27049	-0.256917	-0.296716	-0.253254	-0.259689
1.805	-0.293	-0.269415	-0.256902	-0.297716	-0.252871	-0.259291
1.806	-0.293139	-0.267961	-0.256841	-0.298449	-0.252477	-0.258835
1.807	-0.293064	-0.266213	-0.256713	-0.298762	-0.252165	-0.258304
1.808	-0.292613	-0.264295	-0.256552	-0.298588	-0.252045	-0.257942
1.809	-0.291671	-0.262461	-0.256302	-0.297996	-0.252073	-0.257951
1.81	-0.290268	-0.26097	-0.255903	-0.297059	-0.252058	-0.258342
1.811	-0.288605	-0.259955	-0.255368	-0.295828	-0.251863	-0.259029
1.812	-0.286909	-0.259451	-0.254768	-0.294407	-0.251513	-0.259802
1.813	-0.285311	-0.259333	-0.254288	-0.292894	-0.251154	-0.260447
1.814	-0.283867	-0.259364	-0.254144	-0.291396	-0.250935	-0.260903
1.815	-0.282668	-0.259358	-0.254376	-0.290023	-0.250843	-0.261121
1.816	-0.281893	-0.25924	-0.254834	-0.288868	-0.250677	-0.261113
1.817	-0.281651	-0.259028	-0.255268	-0.288042	-0.250222	-0.261003
1.818	-0.281822	-0.258766	-0.255461	-0.287638	-0.249392	-0.260834
1.819	-0.282146	-0.258524	-0.255407	-0.287577	-0.248245	-0.260609
1.82	-0.282391	-0.258357	-0.25528	-0.28767	-0.246962	-0.260363
1.821	-0.282478	-0.258187	-0.255268	-0.287828	-0.24584	-0.260066
1.822	-0.28251	-0.257817	-0.255419	-0.288023	-0.245114	-0.259656
1.823	-0.28256	-0.257116	-0.255599	-0.288182	-0.244743	-0.259113
1.824	-0.282501	-0.256158	-0.25571	-0.288243	-0.244545	-0.258406
1.825	-0.282111	-0.255153	-0.255845	-0.288115	-0.24446	-0.257508
1.826	-0.281229	-0.254287	-0.256101	-0.287728	-0.244483	-0.256493
1.827	-0.279909	-0.253613	-0.256445	-0.287193	-0.244522	-0.255439
1.828	-0.278395	-0.253099	-0.256803	-0.286635	-0.244481	-0.2543
1.829	-0.276903	-0.252709	-0.257073	-0.286052	-0.244276	-0.253091
1.83	-0.275599	-0.252426	-0.257097	-0.28547	-0.243835	-0.251944
1.831	-0.274641	-0.252161	-0.256736	-0.285001	-0.243212	-0.250848
1.832	-0.274101	-0.251706	-0.255979	-0.284734	-0.242502	-0.249763
1.833	-0.273908	-0.251009	-0.254953	-0.28464	-0.241652	-0.248803
1.834	-0.273935	-0.250244	-0.253748	-0.284527	-0.240572	-0.248044
1.835	-0.274146	-0.249548	-0.252364	-0.284114	-0.239328	-0.247459
1.836	-0.274585	-0.248911	-0.250897	-0.28323	-0.238108	-0.246972
1.837	-0.275235	-0.248284	-0.249554	-0.281932	-0.237069	-0.246433
1.838	-0.275891	-0.247706	-0.248605	-0.280462	-0.236241	-0.245711
1.839	-0.276329	-0.247282	-0.2483	-0.279105	-0.235551	-0.244876
1.84	-0.276508	-0.247086	-0.248695	-0.277988	-0.234962	-0.244112
1.841	-0.276484	-0.247097	-0.24964	-0.277084	-0.234547	-0.243433
1.842	-0.27628	-0.247197	-0.250854	-0.27636	-0.234338	-0.242726
1.843	-0.275994	-0.247288	-0.251998	-0.275772	-0.234296	-0.242055
1.844	-0.275764	-0.247349	-0.252868	-0.275219	-0.234379	-0.241603
1.845	-0.275607	-0.247302	-0.253475	-0.274602	-0.234482	-0.241346
1.846	-0.275474	-0.246979	-0.253862	-0.273863	-0.234428	-0.241075
1.847	-0.275303	-0.246239	-0.253934	-0.272938	-0.234161	-0.240726
1.848	-0.274975	-0.245055	-0.25352	-0.271851	-0.233818	-0.240398
1.849	-0.274447	-0.243477	-0.252575	-0.270819	-0.233583	-0.240123
1.85	-0.273823	-0.241595	-0.251197	-0.270098	-0.233487	-0.239929
1.851	-0.273189	-0.239536	-0.249492	-0.269749	-0.233401	-0.239916
1.852	-0.272549	-0.237437	-0.247608	-0.269682	-0.233209	-0.240072
1.853	-0.271985	-0.235382	-0.245776	-0.26981	-0.232881	-0.240265
1.854	-0.271572	-0.233328	-0.244172	-0.270026	-0.232446	-0.24038
1.855	-0.271179	-0.231255	-0.242842	-0.270199	-0.231921	-0.240327
1.856	-0.270657	-0.229358	-0.241767	-0.270211	-0.231332	-0.240126
1.857	-0.269969	-0.227831	-0.240894	-0.269937	-0.230779	-0.239896
1.858	-0.269058	-0.226642	-0.240166	-0.269331	-0.230371	-0.239645
1.859	-0.267862	-0.225703	-0.239572	-0.268557	-0.230169	-0.239252
1.86	-0.266486	-0.22499	-0.239094	-0.267844	-0.230206	-0.238624
1.861	-0.265213	-0.224481	-0.238675	-0.267213	-0.230434	-0.237824
1.862	-0.264287	-0.224167	-0.238347	-0.266503	-0.23072	-0.237062
1.863	-0.263793	-0.224035	-0.238261	-0.265638	-0.230945	-0.236493
1.864	-0.2637	-0.224105	-0.238436	-0.264762	-0.230994	-0.236107
1.865	-0.263967	-0.224388	-0.23874	-0.264037	-0.230749	-0.235798
1.866	-0.264568	-0.224799	-0.239104	-0.263426	-0.2302	-0.235491
1.867	-0.265396	-0.22522	-0.239505	-0.262859	-0.229531	-0.235205
1.868	-0.266291	-0.225569	-0.239867	-0.262373	-0.228928	-0.235005
1.869	-0.267096	-0.225795	-0.240154	-0.261979	-0.228335	-0.234917
1.87	-0.267551	-0.225857	-0.240471	-0.261613	-0.227607	-0.234831
1.871	-0.267375	-0.225662	-0.240881	-0.261241	-0.226766	-0.234569
1.872	-0.266561	-0.225104	-0.241283	-0.260852	-0.22595	-0.234118
1.873	-0.265341	-0.224292	-0.241597	-0.260446	-0.225228	-0.233663
1.874	-0.263916	-0.223576	-0.241821	-0.260114	-0.224581	-0.233312
1.875	-0.262423	-0.223198	-0.241916	-0.259905	-0.223953	-0.232972
1.876	-0.260983	-0.223072	-0.241823	-0.259648	-0.223316	-0.232479
1.877	-0.259736	-0.222979	-0.241492	-0.259163	-0.222713	-0.231749
1.878	-0.258783	-0.222863	-0.240918	-0.258457	-0.222193	-0.230879
1.879	-0.258062	-0.222874	-0.240208	-0.257566	-0.221709	-0.230072
1.88	-0.257438	-0.223216	-0.239501	-0.256507	-0.221149	-0.229469
1.881	-0.256877	-0.223953	-0.238862	-0.255384	-0.22047	-0.229087
1.882	-0.256454	-0.224981	-0.238263	-0.254302	-0.219662	-0.22886
1.883	-0.256252	-0.226115	-0.237644	-0.253306	-0.218657	-0.228712
1.884	-0.256309	-0.227134	-0.236985	-0.25241	-0.217461	-0.228573
1.885	-0.256642	-0.227938	-0.236235	-0.251551	-0.216206	-0.22835
1.886	-0.25724	-0.228552	-0.235318	-0.250685	-0.215026	-0.227938
1.887	-0.257989	-0.228902	-0.234266	-0.249898	-0.214016	-0.227336
1.888	-0.258762	-0.228932	-0.233132	-0.249269	-0.213281	-0.226671
1.889	-0.259543	-0.228709	-0.231891	-0.24877	-0.212887	-0.226042
1.89	-0.260242	-0.228327	-0.23054	-0.248326	-0.212745	-0.225416
1.891	-0.260618	-0.227919	-0.229137	-0.247844	-0.212639	-0.224707
1.892	-0.260462	-0.227651	-0.227685	-0.247261	-0.212436	-0.223805
1.893	-0.259651	-0.22758	-0.226189	-0.246582	-0.212146	-0.222578
1.894	-0.258214	-0.227683	-0.224797	-0.245828	-0.211792	-0.221034
1.895	-0.256389	-0.228	-0.223718	-0.245065	-0.211433	-0.219392
1.896	-0.254466	-0.228568	-0.223044	-0.244446	-0.211173	-0.217917
1.897	-0.25267	-0.229257	-0.222656	-0.244045	-0.211048	-0.216776
1.898	-0.251055	-0.229919	-0.222346	-0.243794	-0.211018	-0.216102
1.899	-0.249519	-0.230533	-0.222047	-0.24362	-0.211016	-0.216036
1.9	-0.248044	-0.231067	-0.221798	-0.243518	-0.211032	-0.216566
1.901	-0.246783	-0.231415	-0.22156	-0.243526	-0.2111	-0.217446
1.902	-0.245889	-0.231564	-0.221246	-0.243676	-0.211175	-0.218347
1.903	-0.24535	-0.231599	-0.220765	-0.243902	-0.211193	-0.219036
1.904	-0.244978	-0.231507	-0.220049	-0.244058	-0.211095	-0.219446
1.905	-0.244544	-0.231206	-0.219171	-0.24404	-0.210781	-0.21965
1.906	-0.244004	-0.230665	-0.21837	-0.243814	-0.210262	-0.219757
1.907	-0.243442	-0.229823	-0.217833	-0.243376	-0.20978	-0.219787
1.908	-0.242768	-0.22866	-0.21764	-0.242756	-0.209551	-0.219731
1.909	-0.24182	-0.227377	-0.217818	-0.242078	-0.209559	-0.219588
1.91	-0.240698	-0.226241	-0.218296	-0.241544	-0.209702	-0.219316
1.911	-0.239679	-0.225376	-0.218937	-0.241337	-0.209935	-0.21887
1.912	-0.238938	-0.224868	-0.219637	-0.24144	-0.210246	-0.218279
1.913	-0.238476	-0.224858	-0.220292	-0.241661	-0.210637	-0.21764
1.914	-0.238237	-0.22542	-0.220774	-0.241882	-0.211078	-0.217082
1.915	-0.23819	-0.226449	-0.221038	-0.242075	-0.21148	-0.216725
1.916	-0.238259	-0.227683	-0.221129	-0.242162	-0.21177	-0.216609
1.917	-0.238313	-0.228868	-0.221046	-0.242132	-0.2119	-0.216679
1.918	-0.238335	-0.229856	-0.220767	-0.242073	-0.21179	-0.216837
1.919	-0.238376	-0.230489	-0.220383	-0.242026	-0.211422	-0.216918
1.92	-0.23834	-0.230628	-0.220073	-0.241981	-0.21088	-0.216803
1.921	-0.238073	-0.230309	-0.219969	-0.241962	-0.210197	-0.216537
1.922	-0.237575	-0.229676	-0.220102	-0.241937	-0.209302	-0.216177
1.923	-0.23694	-0.228875	-0.22045	-0.24174	-0.208196	-0.215661
1.924	-0.236208	-0.228052	-0.220963	-0.241194	-0.206995	-0.214954
1.925	-0.235474	-0.22736	-0.221526	-0.24022	-0.205862	-0.21406
1.926	-0.234945	-0.226903	-0.222051	-0.238889	-0.204908	-0.212939
1.927	-0.234684	-0.226662	-0.222608	-0.237439	-0.204108	-0.211595
1.928	-0.234561	-0.226559	-0.223285	-0.236067	-0.203377	-0.210113
1.929	-0.234554	-0.226534	-0.224029	-0.234756	-0.202722	-0.208604
1.93	-0.234809	-0.226508	-0.224802	-0.233488	-0.202224	-0.207165
1.931	-0.235378	-0.226349	-0.225587	-0.232364	-0.201845	-0.205844
1.932	-0.236114	-0.225974	-0.22623	-0.231446	-0.201441	-0.204672
1.933	-0.236792	-0.225449	-0.226545	-0.230675	-0.200964	-0.203685
1.934	-0.237227	-0.224938	-0.226434	-0.22998	-0.200372	-0.202929
1.935	-0.237357	-0.224513	-0.225861	-0.22933	-0.199576	-0.202419
1.936	-0.237194	-0.224013	-0.224822	-0.228658	-0.198622	-0.2021
1.937	-0.236751	-0.223284	-0.223355	-0.227885	-0.197664	-0.201914
1.938	-0.23609	-0.22246	-0.221649	-0.227061	-0.196773	-0.201788
1.939	-0.235305	-0.221819	-0.220016	-0.226367	-0.195939	-0.201598
1.94	-0.234461	-0.221517	-0.218721	-0.225892	-0.195232	-0.201272
1.941	-0.233598	-0.221475	-0.217949	-0.22557	-0.194753	-0.200839
1.942	-0.232698	-0.221454	-0.217752	-0.225308	-0.194505	-0.200326
1.943	-0.231717	-0.221262	-0.218008	-0.225048	-0.194518	-0.199721
1.944	-0.230773	-0.220905	-0.218529	-0.224737	-0.194848	-0.199085
1.945	-0.230124	-0.220466	-0.219135	-0.224274	-0.195351	-0.198529
1.946	-0.229917	-0.219933	-0.219677	-0.223596	-0.195761	-0.198162
1.947	-0.230159	-0.21929	-0.220093	-0.222838	-0.195929	-0.198083
1.948	-0.230787	-0.218581	-0.220385	-0.22218	-0.195833	-0.198264
1.949	-0.23163	-0.217802	-0.220531	-0.221622	-0.195484	-0.198567
1.95	-0.232424	-0.216903	-0.220509	-0.221101	-0.194936	-0.198894
1.951	-0.232965	-0.21592	-0.220422	-0.220609	-0.194298	-0.199193
1.952	-0.233206	-0.214989	-0.220402	-0.220146	-0.193707	-0.199459
1.953	-0.233179	-0.214192	-0.22045	-0.219744	-0.193284	-0.199752
1.954	-0.232928	-0.213515	-0.220486	-0.219418	-0.19312	-0.200106
1.955	-0.232469	-0.212949	-0.220497	-0.21904	-0.193223	-0.20052
1.956	-0.231805	-0.212472	-0.220547	-0.218528	-0.193487	-0.20098
1.957	-0.230973	-0.212019	-0.220691	-0.218028	-0.193796	-0.201405
1.958	-0.230016	-0.211541	-0.220919	-0.217704	-0.194132	-0.2017
1.959	-0.228979	-0.211068	-0.221148	-0.217566	-0.194452	-0.201873
1.96	-0.227935	-0.210745	-0.221325	-0.217547	-0.194594	-0.201988
1.961	-0.226892	-0.210762	-0.221459	-0.217597	-0.194352	-0.202014
1.962	-0.225808	-0.211188	-0.221513	-0.21768	-0.19365	-0.201862
1.963	-0.224768	-0.211939	-0.22139	-0.217805	-0.1927	-0.201529
1.964	-0.223893	-0.212885	-0.220979	-0.218026	-0.191853	-0.201099
1.965	-0.223151	-0.213888	-0.220165	-0.218319	-0.191258	-0.200665
1.966	-0.222503	-0.2148	-0.218966	-0.2186	-0.190821	-0.200309
1.967	-0.22197	-0.215453	-0.217588	-0.218837	-0.190418	-0.200094
1.968	-0.221493	-0.215659	-0.21628	-0.219037	-0.19006	-0.199977
1.969	-0.22107	-0.215309	-0.215182	-0.219229	-0.189856	-0.199793
1.97	-0.220812	-0.214501	-0.214227	-0.219473	-0.189858	-0.199418
1.971	-0.220752	-0.213458	-0.21334	-0.219703	-0.190029	-0.198836
1.972	-0.220776	-0.212355	-0.212683	-0.219704	-0.190319	-0.198075
1.973	-0.220746	-0.2113	-0.212427	-0.219352	-0.190654	-0.197201
1.974	-0.220666	-0.210369	-0.212523	-0.218688	-0.190945	-0.196276
1.975	-0.220633	-0.209629	-0.212904	-0.217779	-0.191069	-0.195369
1.976	-0.220576	-0.209122	-0.213482	-0.21667	-0.190923	-0.19456
1.977	-0.22024	-0.208799	-0.214015	-0.21543	-0.190593	-0.193878
1.978	-0.21955	-0.208588	-0.214312	-0.214178	-0.190343	-0.19334
1.979	-0.21874	-0.208464	-0.214333	-0.213048	-0.190286	-0.192953
1.98	-0.218094	-0.208419	-0.214112	-0.21215	-0.190167	-0.192628
1.981	-0.217694	-0.208399	-0.213753	-0.211514	-0.189635	-0.192227
1.982	-0.217479	-0.208331	-0.213357	-0.211102	-0.188644	-0.191613
1.983	-0.21743	-0.208208	-0.212906	-0.210878	-0.187413	-0.190761
1.984	-0.217529	-0.208111	-0.212295	-0.210808	-0.186189	-0.189819
1.985	-0.217804	-0.208093	-0.211423	-0.210882	-0.18517	-0.18898
1.986	-0.218395	-0.208076	-0.210278	-0.211133	-0.184381	-0.188315
1.987	-0.219324	-0.207953	-0.208998	-0.211499	-0.183694	-0.187814
1.988	-0.220362	-0.207734	-0.207712	-0.211737	-0.183083	-0.187449
1.989	-0.221211	-0.207537	-0.206448	-0.211609	-0.182654	-0.187155
1.99	-0.221734	-0.207527	-0.205309	-0.211117	-0.182516	-0.186841
1.991	-0.221986	-0.207818	-0.204522	-0.21045	-0.1827	-0.186457
1.992	-0.222085	-0.208362	-0.204237	-0.209796	-0.183123	-0.186015
1.993	-0.222132	-0.209043	-0.204466	-0.209276	-0.183689	-0.185586
1.994	-0.222188	-0.209706	-0.205178	-0.208923	-0.184325	-0.185194
1.995	-0.222271	-0.210119	-0.206278	-0.208672	-0.184888	-0.184731
1.996	-0.222384	-0.210176	-0.207604	-0.208461	-0.185145	-0.184049
1.997	-0.222546	-0.209954	-0.209021	-0.208302	-0.184944	-0.183095
1.998	-0.222778	-0.209498	-0.210341	-0.208259	-0.184343	-0.182056
[truncated: 1,001 more rows]

## Sheet: D583K_surfer_traces
time (s)	current (nA)
0	0.000919367	-3.67798e-06	1.41993e-08	-0.000428279	-4.05998e-05	3.6936e-05	3.70638e-06	-1.47545e-05	-0.000147673
0.001	0.00575306	-1.97516e-05	2.59358e-05	-0.00264128	-0.000214481	0.000183743	6.05466e-05	-8.29702e-05	-0.00093759
0.002	0.017925	-3.60045e-05	0.000131797	-0.00812846	-0.000567378	0.000464749	0.000276995	-0.000194258	-0.00289719
0.003	0.0384694	-2.33683e-05	0.000307288	-0.0174756	-0.00110607	0.000868308	0.000627802	-0.000227618	-0.00603015
0.004	0.0647882	2.57442e-05	0.000407931	-0.0306007	-0.001852	0.00135865	0.000881295	-2.13236e-05	-0.00983809
0.005	0.0906139	0.000138852	0.000250154	-0.0471154	-0.00277506	0.00183831	0.000866065	0.00056589	-0.0136624
0.006	0.108768	0.000352578	-0.000140306	-0.0662024	-0.00378809	0.00230849	0.000557021	0.0015553	-0.0168736
0.007	0.115231	0.000601432	-0.000450885	-0.0867038	-0.00475373	0.00297068	-1.33886e-06	0.00268909	-0.0190302
0.008	0.109966	0.000721911	-0.000411769	-0.107349	-0.00553119	0.00399423	-0.000616945	0.00356279	-0.0200009
0.009	0.0952416	0.000549228	-2.34373e-05	-0.126793	-0.00606029	0.00531187	-0.00100685	0.00396123	-0.019875
0.01	0.074152	3.92238e-05	0.000631934	-0.143837	-0.00634499	0.00670319	-0.00102342	0.00395398	-0.018766
0.011	0.049618	-0.000667231	0.00146312	-0.157911	-0.00642481	0.00793115	-0.000660207	0.00373259	-0.0168261
0.012	0.0247767	-0.00134525	0.00227155	-0.169184	-0.00632809	0.00875983	0.000115229	0.00348466	-0.014319
0.013	0.00442175	-0.00184483	0.0029211	-0.178026	-0.00609964	0.00899859	0.00128721	0.00337843	-0.0114791
0.014	-0.00556596	-0.00217246	0.00347495	-0.184533	-0.00583066	0.00863847	0.00266709	0.00350892	-0.00848623
0.015	-0.000690311	-0.00238411	0.00402584	-0.188667	-0.00557398	0.00785975	0.00398739	0.00385852	-0.00559276
0.016	0.0201736	-0.00243167	0.00455904	-0.190602	-0.00538418	0.00683285	0.00503892	0.0043433	-0.00308625
0.017	0.0540365	-0.00221087	0.00501245	-0.190781	-0.00530781	0.00565769	0.00575544	0.00483377	-0.00116258
0.018	0.0941382	-0.00174074	0.00537909	-0.189595	-0.00520108	0.00450115	0.00618934	0.0051898	0.000181807
0.019	0.131891	-0.00120886	0.00564001	-0.187239	-0.00482787	0.00352062	0.00642974	0.00539101	0.00116189
0.02	0.159642	-0.000757817	0.00570469	-0.18401	-0.00412929	0.00268809	0.00655935	0.00552031	0.00203288
0.021	0.173662	-0.000348597	0.00554255	-0.180328	-0.00320052	0.00191047	0.0065898	0.00556572	0.00289924
0.022	0.175951	5.78641e-05	0.00520487	-0.17634	-0.00213738	0.00121532	0.00641441	0.00541298	0.003738
0.023	0.170129	0.000351458	0.00474306	-0.171849	-0.00100777	0.000747843	0.00595283	0.00495771	0.00457663
0.024	0.157146	0.000419238	0.00421558	-0.16647	4.3197e-05	0.000672512	0.00524114	0.00418093	0.00545827
0.025	0.137893	0.000300127	0.0036968	-0.15954	0.000732536	0.0010885	0.00428967	0.00321882	0.00629845
0.026	0.116032	9.44775e-05	0.00327774	-0.150256	0.000805837	0.00203177	0.00311769	0.00223541	0.00699769
0.027	0.0974122	-0.00016111	0.00301787	-0.138489	0.000179537	0.00343591	0.00188095	0.00128829	0.00751325
0.028	0.0887685	-0.000467734	0.00291496	-0.125802	-0.00107462	0.00509335	0.000799426	0.000421466	0.00776133
0.029	0.0963662	-0.00085999	0.00299333	-0.115196	-0.00274567	0.0068174	2.38479e-05	-0.000203145	0.00773505
0.03	0.128429	-0.00139841	0.00329876	-0.109241	-0.0045526	0.00854838	-0.000444226	-0.000303411	0.00764925
0.031	0.196462	-0.00197965	0.00376624	-0.108506	-0.00623026	0.0101987	-0.000660408	0.000287349	0.00771317
0.032	0.303741	-0.00238915	0.00417708	-0.111472	-0.00753491	0.0115836	-0.000616771	0.00138114	0.00785402
0.033	0.436354	-0.0026298	0.00436508	-0.11569	-0.00830518	0.012601	-0.000337746	0.00260753	0.00784222
0.034	0.571757	-0.00284584	0.00438191	-0.11934	-0.00852415	0.0132965	9.22377e-05	0.00373053	0.00759492
0.035	0.690515	-0.00305327	0.00432575	-0.121801	-0.00822991	0.0136921	0.000653325	0.00464566	0.00717568
0.036	0.781511	-0.00317201	0.00422676	-0.1232	-0.00739687	0.0136643	0.00132273	0.00528571	0.0066438
0.037	0.840797	-0.00316498	0.00416075	-0.124064	-0.00592985	0.012984	0.00202867	0.00571467	0.00611007
0.038	0.866738	-0.00307017	0.00422419	-0.125069	-0.0038238	0.0115294	0.00277811	0.00613648	0.00574205
0.039	0.858634	-0.00295137	0.00438675	-0.126403	-0.00131072	0.00949202	0.003618	0.00661762	0.00563724
0.04	0.818935	-0.00290019	0.00459669	-0.127486	0.00121038	0.00722503	0.00448624	0.00700075	0.00580338
0.041	0.754777	-0.00301652	0.00490384	-0.127553	0.00330889	0.00501468	0.00518925	0.00720651	0.00613778
0.042	0.676519	-0.00329502	0.00533665	-0.125951	0.00462	0.00311593	0.00556353	0.00735948	0.00650366
0.043	0.592049	-0.00366021	0.0058611	-0.121842	0.00496997	0.00175511	0.00561681	0.00761814	0.00688198
0.044	0.504246	-0.00407762	0.00640139	-0.114471	0.00449487	0.00100057	0.00540998	0.00799486	0.00727801
0.045	0.416278	-0.00455281	0.00683604	-0.103897	0.00351118	0.00081339	0.00497102	0.00836453	0.00759805
0.046	0.336126	-0.00510317	0.00708612	-0.0910841	0.00222325	0.00115242	0.00437841	0.00863078	0.00771755
0.047	0.274084	-0.00567075	0.00715825	-0.0773161	0.000729469	0.00192803	0.00372684	0.00874643	0.00757971
0.048	0.237177	-0.00611692	0.0070672	-0.0637934	-0.000759433	0.00300096	0.00307496	0.00868921	0.00718853
0.049	0.226977	-0.00637764	0.00678585	-0.0515865	-0.00187963	0.00423951	0.00251345	0.00848667	0.00657087
0.05	0.241158	-0.00647471	0.0063098	-0.0414927	-0.00237267	0.00560382	0.00214679	0.00814824	0.00581173
0.051	0.275309	-0.00640632	0.00571829	-0.0342952	-0.00232181	0.00714962	0.00197216	0.00767552	0.00502993
0.052	0.323514	-0.0061326	0.00513814	-0.0315495	-0.00200461	0.00883517	0.00189611	0.00714647	0.00426555
0.053	0.376823	-0.00562577	0.004634	-0.0355223	-0.00159357	0.0104659	0.00189059	0.00668885	0.00352946
0.054	0.42101	-0.0049216	0.0040903	-0.0479762	-0.00108077	0.011823	0.00194978	0.00636426	0.00293301
0.055	0.438626	-0.0041079	0.00330105	-0.0689488	-0.00042488	0.0126956	0.00194972	0.00610645	0.00262273
0.056	0.417276	-0.00326869	0.00228558	-0.0964711	0.000369013	0.0129023	0.00176966	0.00581437	0.00263415
0.057	0.356855	-0.0024273	0.0013519	-0.127638	0.00122057	0.0123651	0.00143288	0.00541981	0.00283547
0.058	0.267367	-0.001531	0.000748353	-0.159906	0.0019229	0.0111957	0.00105084	0.00487252	0.00303768
0.059	0.161291	-0.000609467	0.000528574	-0.191258	0.00223687	0.00970989	0.00074951	0.00419748	0.00321294
0.06	0.0498112	0.00010845	0.00072985	-0.219903	0.00202858	0.00820458	0.000651082	0.00349996	0.00352692
0.061	-0.05693	0.000419475	0.00130321	-0.244394	0.00131313	0.00677552	0.000817663	0.00287361	0.00415257
0.062	-0.149079	0.000307395	0.00201516	-0.264183	0.000194549	0.00542637	0.00122056	0.0024212	0.00512537
0.063	-0.216507	-0.000228476	0.00262136	-0.279881	-0.0011546	0.00419436	0.00186239	0.0022472	0.00629519
0.064	-0.250695	-0.0011928	0.00300306	-0.292299	-0.0024546	0.00313791	0.0028156	0.00231097	0.00732907
0.065	-0.248576	-0.0024341	0.00321449	-0.30102	-0.00344082	0.00226311	0.0040879	0.00246502	0.00788914
0.066	-0.213287	-0.00367274	0.00343919	-0.304333	-0.00397341	0.00154682	0.00554072	0.00263361	0.00790928
0.067	-0.152127	-0.00462451	0.00377516	-0.300663	-0.00403044	0.0010089	0.00689464	0.00285549	0.00758906
0.068	-0.0758587	-0.00505509	0.00412626	-0.289603	-0.00374428	0.00061512	0.00784262	0.00315372	0.00711753
0.069	0.00294284	-0.00483732	0.0043536	-0.271813	-0.00334162	0.000329581	0.00825402	0.00339045	0.00651583
0.07	0.0747577	-0.00404767	0.00439838	-0.248934	-0.00296072	0.000324587	0.00823658	0.0034065	0.00577132
0.071	0.133144	-0.00296251	0.00425291	-0.223544	-0.00259615	0.000823961	0.00795016	0.00322411	0.00503933
0.072	0.169643	-0.00190468	0.00398269	-0.198467	-0.00224017	0.00187461	0.00743039	0.00294885	0.00460239
0.073	0.174601	-0.00107785	0.00370476	-0.175863	-0.00198069	0.00335113	0.00662529	0.00262625	0.00464766
0.074	0.142404	-0.000489812	0.00341133	-0.156936	-0.0019498	0.00501025	0.00554216	0.00221686	0.00512004
0.075	0.0747191	-6.33986e-05	0.00295946	-0.142538	-0.00229844	0.00662251	0.00436195	0.00163596	0.00576295
0.076	-0.0186136	0.000184203	0.00229754	-0.133453	-0.00317692	0.00800524	0.00336538	0.00095261	0.00628381
0.077	-0.122723	0.000203133	0.00158946	-0.129575	-0.00465465	0.0090121	0.00271123	0.000410413	0.00651286
0.078	-0.223551	1.94025e-05	0.00105953	-0.129331	-0.00667567	0.00963319	0.00235702	0.000173155	0.00643073
0.079	-0.309984	-0.000347419	0.000800596	-0.130385	-0.00907166	0.00996358	0.00217775	0.000307144	0.00611157
0.08	-0.372516	-0.000927577	0.000794604	-0.130525	-0.0116322	0.0101039	0.00205059	0.000838818	0.0056748
0.081	-0.404696	-0.00170234	0.00100539	-0.128191	-0.0142671	0.0101299	0.0018987	0.00164616	0.00516194
0.082	-0.40606	-0.00253632	0.0013722	-0.12283	-0.0170273	0.0100896	0.00175823	0.00247176	0.00450647
0.083	-0.382379	-0.00325262	0.00174828	-0.11461	-0.0199695	0.00997008	0.00170918	0.00308321	0.00373326
0.084	-0.343433	-0.00372685	0.00193848	-0.103927	-0.023334	0.00962678	0.00177926	0.00343062	0.00294841
0.085	-0.298372	-0.00390706	0.00181901	-0.0914413	-0.0278006	0.00883991	0.00192121	0.00364789	0.00212476
0.086	-0.250907	-0.00380475	0.00139436	-0.0782563	-0.0339846	0.00757054	0.00202307	0.00384092	0.00116143
0.087	-0.198664	-0.00345544	0.000832346	-0.0658843	-0.0415319	0.00605492	0.00200615	0.00399103	5.6967e-05
0.088	-0.142423	-0.00291941	0.00041628	-0.055691	-0.0490871	0.00452398	0.00183761	0.00408686	-0.00108937
0.089	-0.100603	-0.00229217	0.000331175	-0.0483124	-0.0550695	0.00304587	0.00146154	0.00415703	-0.00215194
0.09	-0.102428	-0.00162185	0.000507302	-0.043827	-0.0583716	0.00170245	0.000884906	0.00420011	-0.00300625
0.091	-0.161423	-0.000925853	0.00071319	-0.0421271	-0.0586227	0.000649954	0.000255182	0.00415525	-0.00356107
0.092	-0.267541	-0.000258904	0.000746743	-0.0426643	-0.0560491	-3.96015e-05	-0.000220326	0.00391433	-0.0037917
0.093	-0.400877	0.000397421	0.000537652	-0.0442237	-0.0512341	-0.000434681	-0.000356161	0.00349617	-0.00365318
0.094	-0.542154	0.00109082	0.000185751	-0.0454751	-0.0448277	-0.0006244	-5.19755e-05	0.00316218	-0.00307119
0.095	-0.67473	0.001689	-8.44366e-05	-0.0454763	-0.0373877	-0.000616689	0.00064972	0.00320663	-0.00211637
0.096	-0.783653	0.00198392	-9.54308e-05	-0.043691	-0.0295114	-0.000331794	0.00161584	0.00368606	-0.000972552
0.097	-0.856011	0.00184354	0.00013129	-0.0401052	-0.0218283	0.000243521	0.00269538	0.00439832	0.000291694
0.098	-0.885254	0.00117462	0.000439926	-0.0350779	-0.0148587	0.000919815	0.00364583	0.00509198	0.00154264
0.099	-0.875615	1.79893e-05	0.000718305	-0.0288819	-0.00899649	0.00146731	0.00415261	0.00559752	0.00228317
0.1	-0.838543	-0.00136068	0.000941288	-0.0217349	-0.00449697	0.00177581	0.004041	0.00585686	0.00203826
0.101	-0.783772	-0.00262892	0.00112364	-0.013991	-0.00146462	0.00184495	0.00345168	0.00598438	0.000878291
0.102	-0.715942	-0.00358791	0.00123755	-0.00626114	0.000128091	0.00170892	0.00279969	0.00607056	-0.000721062
0.103	-0.636858	-0.00419934	0.00109758	3.65503e-05	0.000438205	0.00132439	0.00240329	0.00598249	-0.00233655
0.104	-0.548181	-0.00450871	0.000476374	0.00244453	-0.000288729	0.000629512	0.00222562	0.00564176	-0.00369228
0.105	-0.4545	-0.00458854	-0.000652993	-0.00151197	-0.00179495	-0.000313774	0.00208141	0.00516674	-0.00451209
0.106	-0.363296	-0.00447328	-0.00212155	-0.0129422	-0.00381443	-0.00132484	0.00184137	0.00466431	-0.00463584
0.107	-0.280057	-0.00414378	-0.00367102	-0.0311344	-0.00607852	-0.00219378	0.00137767	0.00418452	-0.00411357
0.108	-0.207086	-0.00363005	-0.00501006	-0.0539779	-0.00843636	-0.00273038	0.000641036	0.00372886	-0.00301941
0.109	-0.147124	-0.00305126	-0.00588129	-0.0784692	-0.0108991	-0.0027624	-0.000178435	0.00323158	-0.00139188
0.11	-0.102122	-0.00250778	-0.00613524	-0.101168	-0.0133979	-0.00218425	-0.000772195	0.00267113	0.000642593
0.111	-0.0692063	-0.00203133	-0.00578816	-0.118996	-0.0155155	-0.00106863	-0.000926276	0.0021425	0.00287409
0.112	-0.0416586	-0.00171461	-0.00496361	-0.129945	-0.016667	0.000299781	-0.000656368	0.00175587	0.00508679
0.113	-0.0130388	-0.00178109	-0.00376649	-0.133202	-0.0165115	0.00157818	-0.00017084	0.00157816	0.00704324
0.114	0.0196628	-0.00243677	-0.00225307	-0.129099	-0.0150329	0.00258511	0.000386503	0.00169477	0.00849552
0.115	0.0559936	-0.00367078	-0.000464557	-0.119088	-0.0124239	0.00331851	0.00104946	0.00217893	0.0092906
0.116	0.093805	-0.00515663	0.00147643	-0.105491	-0.00905922	0.00370483	0.00183964	0.00300881	0.00941724
0.117	0.130191	-0.0064676	0.00332833	-0.0909332	-0.00539918	0.00349541	0.00262969	0.0040442	0.00895291
0.118	0.162762	-0.00736613	0.0049243	-0.0779156	-0.00183192	0.00255816	0.00332247	0.00506648	0.00795912
0.119	0.191736	-0.00775318	0.00623581	-0.068608	0.00134741	0.00108665	0.00394826	0.0058931	0.00646699
0.12	0.219991	-0.00761389	0.00717442	-0.0644163	0.0039308	-0.000543866	0.00447339	0.00642305	0.00460596
0.121	0.248737	-0.00704775	0.00757755	-0.0654222	0.00590923	-0.00200062	0.00478165	0.00663397	0.00257097
0.122	0.273985	-0.00620421	0.00736616	-0.0703545	0.0074428	-0.00309253	0.00483329	0.00658164	0.00052162
0.123	0.289525	-0.0052862	0.00657856	-0.0768778	0.00864111	-0.00363469	0.00467379	0.00631764	-0.00134864
0.124	0.291284	-0.00451055	0.00532365	-0.082088	0.00949496	-0.00334291	0.00434473	0.00588193	-0.00276259
0.125	0.277845	-0.00396557	0.00376625	-0.0838461	0.00994856	-0.00205958	0.0038618	0.00538441	-0.00343531
0.126	0.249437	-0.0036355	0.00221124	-0.0818891	0.00995657	7.29553e-05	0.00329114	0.00497355	-0.00324782
0.127	0.207122	-0.00353493	0.00107809	-0.0776201	0.00946615	0.00272275	0.00279267	0.00470406	-0.00231249
0.128	0.152916	-0.00372057	0.000577879	-0.0736767	0.00832834	0.00552294	0.00251978	0.00454424	-0.000807932
0.129	0.0914917	-0.00419078	0.000535033	-0.0735001	0.00642618	0.00814514	0.00247462	0.00452151	0.00113677
0.13	0.0308827	-0.00482157	0.000721641	-0.0798391	0.00389992	0.0103483	0.00249206	0.00466207	0.00331526
0.131	-0.0199114	-0.00547011	0.00118794	-0.0928061	0.00109614	0.0120058	0.00244957	0.00481797	0.00530313
0.132	-0.0546264	-0.00604664	0.00200076	-0.109764	-0.0016319	0.013056	0.00244608	0.00473127	0.00666217
0.133	-0.071506	-0.00641115	0.00298243	-0.127526	-0.00403212	0.0134643	0.00259182	0.00429206	0.0072937
0.134	-0.0725331	-0.00631356	0.00391903	-0.144234	-0.0059183	0.0132896	0.00277795	0.00369893	0.00747231
0.135	-0.0618505	-0.00552294	0.00461465	-0.159241	-0.00717632	0.0127086	0.00285188	0.00322128	0.00750441
0.136	-0.0443303	-0.00409828	0.00481895	-0.172376	-0.00781942	0.0118796	0.00285291	0.00287243	0.00740219
0.137	-0.0255727	-0.00242949	0.00440853	-0.183758	-0.00792262	0.0109066	0.00295573	0.00255048	0.00699323
0.138	-0.0129142	-0.00091375	0.00346549	-0.193752	-0.00755191	0.00992737	0.00328152	0.00229369	0.00624032
0.139	-0.0139054	0.000223076	0.0021604	-0.202687	-0.00680012	0.00903131	0.0037685	0.00223033	0.00532408
0.14	-0.032861	0.000811696	0.000692625	-0.210649	-0.00585927	0.00819441	0.00412558	0.00241515	0.00445035
0.141	-0.0644305	0.00072628	-0.00069458	-0.21767	-0.00493423	0.00743376	0.00411111	0.0027509	0.0036767
0.142	-0.0904529	2.22543e-05	-0.00172864	-0.223632	-0.00406838	0.00684705	0.00380939	0.00306542	0.00302345
0.143	-0.0949888	-0.00101611	-0.00220691	-0.227654	-0.00319353	0.00647639	0.00341066	0.00323314	0.00266648
0.144	-0.0782853	-0.00202073	-0.0020448	-0.228145	-0.00228751	0.00630891	0.00300526	0.00323636	0.0028597
0.145	-0.0492847	-0.0027844	-0.0012726	-0.223618	-0.00137849	0.00631426	0.00260354	0.00315424	0.00366695
0.146	-0.015134	-0.00328179	-4.71859e-05	-0.213278	-0.000499269	0.00637532	0.00220136	0.00307553	0.0048435
0.147	0.0188339	-0.00354964	0.00149539	-0.197077	0.000220358	0.00632485	0.00180593	0.00305251	0.00601959
0.148	0.0446174	-0.0036839	0.00333345	-0.17563	0.000542614	0.00606794	0.00135178	0.00309124	0.00694547
0.149	0.0531106	-0.00375054	0.00537301	-0.150483	0.000372311	0.00559524	0.00077454	0.00314513	0.0074894
0.15	0.040805	-0.0037516	0.00737516	-0.124111	-0.000134245	0.00486428	0.000154846	0.0031824	0.00753157
0.151	0.0109385	-0.00372283	0.0090348	-0.0991338	-0.000714977	0.00371225	-0.000322461	0.00324289	0.00705642
0.152	-0.0302297	-0.00369164	0.0100311	-0.077761	-0.00106667	0.00210275	-0.000552388	0.00336912	0.00629149
0.153	-0.0753664	-0.00361088	0.0102302	-0.0618024	-0.000877188	0.000381226	-0.000628931	0.00346485	0.00554387
0.154	-0.116965	-0.00337543	0.00977809	-0.0526845	-2.45478e-05	-0.00101411	-0.000676384	0.00338476	0.00497719
0.155	-0.149262	-0.00291133	0.00881386	-0.0516258	0.0012993	-0.00190973	-0.000723089	0.00318787	0.00460081
0.156	-0.169007	-0.0022393	0.00729241	-0.0598598	0.00277986	-0.00227096	-0.000783142	0.00302557	0.00432523
0.157	-0.174884	-0.00141395	0.00521523	-0.078257	0.00413897	-0.00204702	-0.000864547	0.00283719	0.00410673
0.158	-0.167504	-0.000504159	0.0028797	-0.106366	0.00509902	-0.00125804	-0.000992639	0.00240269	0.00398586
0.159	-0.149824	0.000384038	0.000784104	-0.141736	0.0054257	-9.17643e-06	-0.00120487	0.00168512	0.00394063
0.16	-0.126654	0.00116915	-0.000708969	-0.180026	0.0050315	0.00146405	-0.00139044	0.000937475	0.00393171
0.161	-0.102803	0.00179982	-0.00153811	-0.215833	0.00405003	0.00279839	-0.00133831	0.00041175	0.00398518
0.162	-0.0804695	0.00223277	-0.00183322	-0.243939	0.0028906	0.00380313	-0.000965749	0.000172608	0.00406836
0.163	-0.057924	0.00248003	-0.00177286	-0.260502	0.00211353	0.00457883	-0.000313801	0.000162295	0.00407669
0.164	-0.0315935	0.00254886	-0.00146813	-0.263894	0.00209052	0.00526575	0.000561385	0.000315782	0.00401243
0.165	0.000835142	0.00239172	-0.00100338	-0.254917	0.00278899	0.00583854	0.00162386	0.000646677	0.00402097
0.166	0.0398678	0.00201742	-0.000562907	-0.236408	0.00384926	0.00609015	0.00279352	0.00116386	0.00417706
0.167	0.0855625	0.00152768	-0.000281248	-0.212319	0.00483306	0.00587032	0.00383852	0.00180543	0.00435665
0.168	0.137905	0.00106998	-7.84996e-05	-0.186395	0.00550576	0.00536345	0.00448775	0.00252524	0.00441255
0.169	0.194354	0.000832491	0.0001824	-0.163411	0.00588703	0.00485837	0.00458727	0.00330477	0.00431508
0.17	0.247157	0.000979748	0.000519878	-0.15264	0.00603992	0.00442797	0.00408633	0.00402309	0.00408981
0.171	0.284307	0.00155141	0.000844363	-0.165519	0.0058923	0.00409982	0.00302466	0.00447085	0.00375435
0.172	0.293825	0.00245382	0.00105812	-0.207566	0.00525403	0.00396737	0.0016048	0.00460707	0.00333332
0.173	0.268423	0.00350886	0.00117449	-0.274013	0.0040015	0.00399426	0.000200356	0.00461122	0.00291649
0.174	0.206737	0.00446227	0.00127009	-0.352189	0.00229894	0.00398026	-0.000874503	0.00462234	0.00265303
0.175	0.11075	0.00515189	0.00136411	-0.427346	0.000566464	0.00379515	-0.00156811	0.00460247	0.00264098
0.176	-0.0112347	0.00565502	0.00149063	-0.487553	-0.000846965	0.00361114	-0.00202858	0.0045028	0.00281027
0.177	-0.138519	0.00602994	0.00172325	-0.525114	-0.00182867	0.00378244	-0.0023887	0.00442489	0.00301403
0.178	-0.247065	0.00617225	0.00208143	-0.536072	-0.00243906	0.00447886	-0.00258033	0.0044918	0.00321644
0.179	-0.322216	0.00598801	0.0025466	-0.519719	-0.00284215	0.00560784	-0.00243406	0.00469994	0.00345668
0.18	-0.356545	0.00543121	0.00307997	-0.478197	-0.003166	0.00697287	-0.00194196	0.00499031	0.00371171
0.181	-0.346751	0.00446297	0.00365414	-0.415779	-0.00340803	0.00830994	-0.00131289	0.00528416	0.00388013
0.182	-0.296073	0.00313681	0.00434646	-0.337994	-0.0034837	0.00931473	-0.000809169	0.00550277	0.00387885
0.183	-0.213314	0.00164883	0.00523626	-0.251289	-0.00332439	0.00977297	-0.000561478	0.00568317	0.00369762
0.184	-0.109341	0.000255651	0.00623729	-0.162863	-0.00292526	0.00961892	-0.00050719	0.0059088	0.00332992
0.185	0.00503077	-0.000786946	0.0071842	-0.0797814	-0.00229578	0.00892587	-0.000566021	0.00616473	0.00274317
0.186	0.119789	-0.0012515	0.00799654	-0.00727918	-0.00143494	0.00786584	-0.000818943	0.00641823	0.00198163
0.187	0.225553	-0.00106938	0.00864185	0.0523272	-0.000374884	0.00661918	-0.00133978	0.0066094	0.00115806
0.188	0.313377	-0.000428351	0.00904028	0.0985749	0.00079369	0.00535806	-0.00197563	0.00657006	0.000345148
0.189	0.376211	0.00040633	0.00911062	0.131208	0.00192173	0.00423111	-0.00244505	0.00625747	-0.000345633
0.19	0.411307	0.00129238	0.00883009	0.150012	0.0028391	0.00329963	-0.00260615	0.00580371	-0.000726197
0.191	0.420526	0.00215986	0.00824037	0.155365	0.00346239	0.00254716	-0.00250987	0.00525695	-0.000674076
0.192	0.410017	0.00292072	0.00745962	0.148406	0.00380563	0.00195827	-0.00218331	0.0046311	-0.000179946
0.193	0.39347	0.00342514	0.0066093	0.130916	0.00390979	0.00159389	-0.00152075	0.00401041	0.000679039
0.194	0.400326	0.00343906	0.00567238	0.105171	0.0039077	0.00153108	-0.000408445	0.00341649	0.00181488
0.195	0.485173	0.00280404	0.00457721	0.0740085	0.00400993	0.00176427	0.00108712	0.00281194	0.00319096
0.196	0.721908	0.00166722	0.00339144	0.0410894	0.00432318	0.00221195	0.00272606	0.00225136	0.0047124
0.197	1.17058	0.000381792	0.00219818	0.010307	0.00480943	0.00268808	0.00422743	0.00182627	0.00624804
0.198	1.83681	-0.000829259	0.00098538	-0.0154909	0.00541755	0.00291267	0.00528886	0.0015031	0.00774593
0.199	2.65902	-0.00192891	-0.000145061	-0.0346411	0.00620796	0.0026731	0.00569186	0.00122085	0.00913034
0.2	3.52993	-0.00286485	-0.00096137	-0.0461496	0.00725113	0.00190963	0.00542174	0.00104775	0.0102703
0.201	4.32931	-0.00349512	-0.00129349	-0.0503395	0.00844509	0.000656622	0.00461936	0.00110541	0.011099
0.202	4.95112	-0.00366005	-0.00105681	-0.049457	0.00967279	-0.000954137	0.00353495	0.00148518	0.0116
0.203	5.32113	-0.00327079	-0.00023679	-0.0463136	0.0109792	-0.00264881	0.00244973	0.00224619	0.0116787
0.204	5.40595	-0.00237489	0.00106929	-0.0424099	0.0124324	-0.0040797	0.0015829	0.00335827	0.0111593
0.205	5.21305	-0.00115685	0.00263633	-0.0378771	0.0140076	-0.00499775	0.00107867	0.00459194	0.00997789
0.206	4.78197	9.90381e-05	0.0042509	-0.0328788	0.0155575	-0.00538841	0.000965523	0.0056029	0.00835014
0.207	4.17279	0.00109652	0.00586266	-0.0282494	0.0168013	-0.00536138	0.00117897	0.00621452	0.00668435
0.208	3.4549	0.00168966	0.00743738	-0.0245901	0.0174803	-0.00493224	0.00166527	0.00645371	0.00532276
0.209	2.69748	0.0018859	0.00881826	-0.0216026	0.0175171	-0.00407008	0.00236992	0.00639051	0.00439372
0.21	1.96235	0.00171595	0.00991229	-0.0185604	0.0169636	-0.00284788	0.00321078	0.00611549	0.00388075
0.211	1.29775	0.00121996	0.0107571	-0.0145899	0.0158883	-0.00137024	0.00413212	0.00577824	0.00374567
0.212	0.735936	0.000423016	0.0112797	-0.00859821	0.0143563	0.000271688	0.00513854	0.00552254	0.00392036
0.213	0.294726	-0.000635702	0.0113137	0.000197986	0.0124218	0.00189906	0.00624569	0.00542354	0.00423416
0.214	-0.0211531	-0.00177952	0.0108358	0.0116518	0.0101279	0.00334402	0.00737465	0.005543	0.00451114
0.215	-0.218929	-0.00278784	0.00999482	0.0248177	0.00755854	0.00459696	0.00832508	0.00596648	0.00467842
0.216	-0.314544	-0.00352708	0.00903803	0.0384459	0.00488453	0.00569758	0.00888164	0.00671088	0.00467857
0.217	-0.328477	-0.00391208	0.00817916	0.0513568	0.00230617	0.00669528	0.00893674	0.00759173	0.00451096
0.218	-0.282556	-0.00392158	0.00749064	0.0627863	-2.67902e-05	0.00770305	0.00849572	0.00828377	0.00434942
0.219	-0.198165	-0.00362788	0.00693384	0.07244	-0.00192875	0.00880799	0.00762379	0.00856428	0.00435584
0.22	-0.0956468	-0.00310977	0.00642799	0.0801728	-0.00320786	0.0100177	0.006445	0.00842647	0.00446434
0.221	0.00525065	-0.00237757	0.00593867	0.0857733	-0.00379421	0.0112092	0.00511251	0.00796695	0.00449068
0.222	0.0862064	-0.00141984	0.00550097	0.088884	-0.003723	0.0120556	0.00370774	0.00723573	0.00436944
0.223	0.13489	-0.000297875	0.00515893	0.089028	-0.003262	0.0122177	0.0022388	0.00627979	0.00420297
0.224	0.148623	0.000830026	0.00499746	0.0857648	-0.00296029	0.0116295	0.000748996	0.0052615	0.00408892
0.225	0.132777	0.00175669	0.00512606	0.0788005	-0.00336878	0.0104962	-0.000645871	0.00431402	0.00401205
0.226	0.0972489	0.00233322	0.00550185	0.0682477	-0.00488952	0.00911154	-0.00174281	0.00332496	0.0039352
0.227	0.0535607	0.0025696	0.0059529	0.0551052	-0.00786509	0.00773484	-0.00228978	0.00207473	0.00386619
0.228	0.0123011	0.00258536	0.00639298	0.0412376	-0.0126853	0.006605	-0.00222519	0.000529175	0.00385775
0.229	-0.0181548	0.0024587	0.00679331	0.0286432	-0.0199429	0.00594178	-0.00180698	-0.00112873	0.00396687
0.23	-0.0322033	0.00219429	0.0070313	0.0188086	-0.0306565	0.00580718	-0.0013922	-0.00260033	0.00416489
0.231	-0.027785	0.00181931	0.00697684	0.0123658	-0.0462045	0.00606638	-0.00114677	-0.00358113	0.00431291
0.232	-0.00588268	0.00138291	0.00660877	0.00886344	-0.0674712	0.00655532	-0.000971968	-0.00389713	0.00426281
0.233	0.0311796	0.000852078	0.00599988	0.00687848	-0.0937001	0.00720347	-0.000702748	-0.00350111	0.00400794
0.234	0.0806618	0.000156772	0.00533146	0.00459068	-0.122278	0.00792945	-0.000248099	-0.00245466	0.00361888
0.235	0.139813	-0.000701994	0.00485274	0.000553083	-0.149582	0.008526	0.000441787	-0.00096155	0.0031197
0.236	0.206747	-0.00171866	0.00472245	-0.00587777	-0.172059	0.00877941	0.00128663	0.000719588	0.00261606
0.237	0.279573	-0.00288601	0.00490357	-0.0145799	-0.186971	0.00860894	0.00205925	0.00231297	0.0023057
0.238	0.354502	-0.00410485	0.00521947	-0.0248514	-0.192757	0.00799951	0.00256413	0.00351384	0.00234881
0.239	0.428521	-0.00521704	0.00549159	-0.0357212	-0.189103	0.00697207	0.00267732	0.00411863	0.00290753
0.24	0.503679	-0.00607164	0.00561715	-0.0462257	-0.176854	0.0056918	0.0023018	0.00414444	0.00406318
0.241	0.583669	-0.00661433	0.00557674	-0.0552885	-0.157769	0.00443956	0.00144579	0.0038255	0.00564103
0.242	0.666079	-0.00690843	0.00544983	-0.0615421	-0.134152	0.00344913	0.000290557	0.00343631	0.00728846
0.243	0.744563	-0.00702541	0.00540405	-0.0635364	-0.108415	0.00273288	-0.000863709	0.00302324	0.0086632
0.244	0.819348	-0.00703551	0.00557781	-0.0602115	-0.0825564	0.00208874	-0.00174573	0.00244656	0.00956586
0.245	0.896797	-0.00707892	0.00595942	-0.0513621	-0.0579614	0.0013184	-0.00221266	0.0016858	0.00998846
0.246	0.977322	-0.00728748	0.00644674	-0.0379321	-0.035648	0.000329086	-0.00216345	0.000927595	0.0100739
0.247	1.05184	-0.00761933	0.00693402	-0.0220208	-0.0165045	-0.000824441	-0.00148953	0.000351241	0.00999723
0.248	1.10915	-0.00790974	0.00725771	-0.00633107	-0.00110864	-0.00196816	-0.000236641	-1.4387e-05	0.0097421
0.249	1.14141	-0.00808097	0.00723088	0.00687031	0.0105427	-0.00301012	0.0012607	-0.000196007	0.00910097
0.25	1.14541	-0.0081887	0.00679085	0.0165284	0.0188521	-0.0039722	0.00256117	-0.000184122	0.00800446
0.251	1.12209	-0.00827598	0.00603295	0.0226643	0.0242435	-0.00486925	0.00344478	8.85736e-05	0.00663537
0.252	1.07519	-0.00824092	0.00511631	0.0256659	0.0271222	-0.00566762	0.00388927	0.000730872	0.0052259
0.253	1.00933	-0.00798754	0.00420887	0.0257456	0.02802	-0.00630357	0.00384676	0.00170641	0.00388972
0.254	0.927785	-0.00762561	0.00343455	0.0228248	0.02747	-0.00674296	0.00329932	0.0026883	0.00268997
0.255	0.832508	-0.00731778	0.00280392	0.0169686	0.0258453	-0.00696915	0.00241787	0.00329071	0.0017915
0.256	0.726274	-0.00710982	0.00231047	0.00893859	0.0234165	-0.00692664	0.00148064	0.00333075	0.00138778
0.257	0.613138	-0.00696577	0.00202121	-3.73589e-05	0.0203332	-0.0065788	0.000664928	0.00284875	0.00158719
0.258	0.49825	-0.00680952	0.00199529	-0.00901093	0.016643	-0.00595166	1.59044e-05	0.00206956	0.00243162
0.259	0.388628	-0.00656522	0.00217761	-0.0176907	0.0125126	-0.00508542	-0.000457197	0.0012411	0.00387007
0.26	0.291148	-0.00622482	0.00245115	-0.0266203	0.00838886	-0.00403532	-0.000802823	0.000487888	0.00569552
0.261	0.210084	-0.00587504	0.00280148	-0.0375873	0.00487754	-0.00290573	-0.00115192	-0.000112798	0.00760365
0.262	0.148289	-0.00560462	0.00331322	-0.0539306	0.00248069	-0.00180386	-0.00154713	-0.000474787	0.00937344
0.263	0.108884	-0.00541204	0.00401253	-0.0803366	0.00150372	-0.000790088	-0.00185178	-0.000528013	0.0109425
0.264	0.0945525	-0.00530155	0.00476844	-0.121052	0.00206222	0.000106579	-0.00190597	-0.000234968	0.012246
0.265	0.105398	-0.00532597	0.00529784	-0.177033	0.00407163	0.000884176	-0.00164977	0.00037822	0.0131888
0.266	0.13824	-0.00548728	0.00534279	-0.245671	0.00731862	0.00156552	-0.00116919	0.00124766	0.0138428
0.267	0.1884	-0.00577172	0.00491524	-0.322416	0.0114587	0.00223008	-0.000662176	0.00230313	0.0142998
0.268	0.251929	-0.00615985	0.00421698	-0.400441	0.0159481	0.0029993	-0.000256735	0.00345401	0.0144175
0.269	0.324684	-0.00653343	0.00342284	-0.469362	0.0202283	0.00384678	6.82291e-05	0.00461623	0.0140159
0.27	0.398121	-0.00670102	0.00272364	-0.516408	0.023942	0.00455843	0.000382636	0.00568707	0.0130488
0.271	0.459614	-0.00652186	0.00236092	-0.530768	0.0268933	0.00494092	0.000754746	0.00647381	0.0115348
0.272	0.499053	-0.00600886	0.00248164	-0.507539	0.0290341	0.00490474	0.00124878	0.00680166	0.00958539
0.273	0.512303	-0.00529227	0.00306282	-0.448164	0.0304911	0.0044263	0.00185255	0.00663188	0.00744864
0.274	0.499285	-0.00449282	0.00396866	-0.359027	0.0314415	0.0036376	0.00244218	0.00601486	0.00539041
0.275	0.462135	-0.00367121	0.00501416	-0.250358	0.0319891	0.00283883	0.00291045	0.00507786	0.00358191
0.276	0.405032	-0.0028818	0.00604305	-0.135195	0.0320903	0.00228342	0.00329073	0.00403468	0.00209668
0.277	0.334013	-0.00223761	0.00694317	-0.0267615	0.0316322	0.00211583	0.00365551	0.00314463	0.000920368
0.278	0.256101	-0.00186798	0.00756643	0.0656277	0.0306553	0.00237932	0.00392255	0.0025937	-1.69965e-05
0.279	0.178948	-0.00179853	0.00783104	0.13864	0.0293957	0.00293297	0.00391844	0.00238144	-0.000844361
0.28	0.110769	-0.00195603	0.00780954	0.193776	0.0280612	0.00360927	0.00360973	0.00240411	-0.00169243
0.281	0.0579188	-0.00229313	0.00752422	0.235027	0.0266776	0.00441238	0.00310805	0.00257434	-0.00250863
0.282	0.0219969	-0.00277106	0.00693679	0.266634	0.0253013	0.00539375	0.00256953	0.00284393	-0.00309894
0.283	0.000510826	-0.00333544	0.00616617	0.291614	0.0241185	0.00647858	0.00213161	0.00319714	-0.00334
0.284	-0.0107717	-0.00395106	0.00536985	0.311199	0.0232373	0.0075215	0.00183816	0.00359138	-0.00325565
0.285	-0.0152791	-0.00444878	0.00448374	0.325793	0.0226615	0.00836757	0.00167032	0.00397083	-0.00295608
0.286	-0.0133329	-0.00451034	0.00339192	0.337655	0.0223839	0.00887481	0.00163087	0.00431747	-0.00254695
0.287	-0.00486375	-0.00397578	0.00224452	0.351825	0.0223853	0.00904219	0.00178979	0.00457747	-0.0021789
0.288	0.00546041	-0.00297458	0.00135489	0.373527	0.0225662	0.00898126	0.00225731	0.00467985	-0.00198675
0.289	0.0100031	-0.0017725	0.000927338	0.405558	0.0227789	0.00870232	0.0030913	0.00459832	-0.00187899
0.29	0.00444485	-0.00066928	0.000962801	0.44792	0.022928	0.00813963	0.00424275	0.00429388	-0.00169837
0.291	-0.0100027	0.000144875	0.00130994	0.498596	0.0228794	0.00737229	0.00559396	0.00376814	-0.00140846
0.292	-0.0288873	0.0007107	0.00180494	0.554589	0.022523	0.0066465	0.00706094	0.00318579	-0.000952244
0.293	-0.0475413	0.00115514	0.0022923	0.612455	0.021946	0.0062042	0.00866755	0.00274053	-0.000302852
0.294	-0.062463	0.00157395	0.0026458	0.6669	0.0212047	0.00610554	0.0105809	0.0025531	0.000409539
0.295	-0.070839	0.00201552	0.00288196	0.710503	0.0202022	0.00621664	0.0131216	0.00276072	0.00106112
0.296	-0.0694566	0.00244798	0.00300514	0.737121	0.0189971	0.00639481	0.0167896	0.00336726	0.00163448
0.297	-0.0547123	0.00280127	0.00291189	0.744595	0.0178936	0.00661002	0.0222634	0.00421465	0.00210285
0.298	-0.0243394	0.00309597	0.00267451	0.73498	0.0171505	0.0068991	0.0301728	0.00521834	0.00240358
0.299	0.0211317	0.00355825	0.00258159	0.714266	0.016815	0.00728712	0.040773	0.00628902	0.00254111
0.3	0.0783588	0.00450406	0.00277309	0.690555	0.0168909	0.00777616	0.0538201	0.00724932	0.00265107
0.301	0.142117	0.00613253	0.00312193	0.670878	0.0174449	0.00836084	0.0686299	0.00806024	0.00293604
0.302	0.206628	0.00862664	0.00344995	0.659578	0.0184498	0.00900817	0.0841979	0.00885005	0.00348465
0.303	0.26573	0.0123486	0.00360589	0.658305	0.0198073	0.00971034	0.0994676	0.00969738	0.00419245
0.304	0.312272	0.0177746	0.00350668	0.665612	0.0215373	0.0105355	0.113689	0.0105798	0.00487368
0.305	0.339355	0.0253085	0.00322235	0.676443	0.0238481	0.0115582	0.126521	0.0114932	0.00541359
0.306	0.342472	0.035057	0.00291033	0.683412	0.0270804	0.0128229	0.138023	0.0125507	0.00587582
0.307	0.320841	0.0466262	0.00276873	0.679853	0.0314529	0.0143211	0.148823	0.014023	0.00634197
0.308	0.27834	0.0592117	0.00294971	0.662641	0.0369485	0.0159929	0.160228	0.0163888	0.00668906
0.309	0.223116	0.0719049	0.00344228	0.63285	0.0434971	0.01787	0.174191	0.0202518	0.0068338
0.31	0.165753	0.0839395	0.00415391	0.593458	0.0509782	0.0201417	0.193205	0.0260444	0.00692934
0.311	0.11637	0.094891	0.00503736	0.547025	0.0590471	0.0230317	0.21993	0.0338752	0.00712433
0.312	0.0804997	0.104854	0.00618629	0.495948	0.0672612	0.0266602	0.256577	0.0436154	0.00745781
0.313	0.0581746	0.114464	0.00787243	0.441221	0.0754631	0.0310181	0.304408	0.0549496	0.00802013
0.314	0.0482836	0.124821	0.0104316	0.378834	0.0839566	0.0360526	0.363425	0.0674132	0.00901117
0.315	0.0508122	0.137538	0.0142051	0.300964	0.0934497	0.0416681	0.432295	0.0804432	0.0107039
0.316	0.0645187	0.154696	0.019537	0.201532	0.104902	0.0477011	0.508588	0.0933618	0.0134752
0.317	0.0857325	0.178512	0.0266568	0.0786287	0.119288	0.0541269	0.589227	0.105546	0.0175967
0.318	0.11021	0.210912	0.0355872	-0.0658219	0.137479	0.0612252	0.671025	0.116868	0.0229647
0.319	0.135869	0.253	0.0460293	-0.225164	0.160329	0.0695543	0.751281	0.127904	0.0293167
0.32	0.162137	0.304547	0.0572969	-0.387879	0.188841	0.079964	0.828187	0.139711	0.0364692
0.321	0.185923	0.364053	0.0685493	-0.540918	0.22408	0.0934962	0.901009	0.153603	0.0441802
0.322	0.201329	0.429232	0.0790947	-0.673263	0.266689	0.111108	0.970058	0.171179	0.0520779
0.323	0.204141	0.497381	0.0885897	-0.776474	0.316603	0.133579	1.03646	0.194357	0.0599703
0.324	0.193407	0.565689	0.0972159	-0.844209	0.373209	0.161688	1.1017	0.22507	0.0681601
0.325	0.169652	0.631587	0.105818	-0.872823	0.435454	0.196304	1.167	0.264711	0.0773241
0.326	0.135857	0.693144	0.115826	-0.862048	0.501796	0.238252	1.23253	0.313671	0.0883243
0.327	0.0986671	0.74947	0.129003	-0.812953	0.570162	0.288139	1.29708	0.371061	0.102232
0.328	0.0648635	0.800883	0.147342	-0.723548	0.638043	0.345999	1.35806	0.434777	0.12029
0.329	0.0383842	0.848674	0.172946	-0.589569	0.702764	0.410929	1.41188	0.502016	0.143796
0.33	0.0220592	0.89457	0.207565	-0.411753	0.761941	0.481216	1.45416	0.569903	0.173871
0.331	0.0187633	0.94007	0.252206	-0.200723	0.813967	0.554701	1.47926	0.635948	0.211067
0.332	0.0298268	0.985897	0.306839	0.024307	0.858375	0.628983	1.47982	0.698338	0.255053
0.333	0.0537137	1.03169	0.370171	0.240917	0.896047	0.701585	1.44736	0.75625	0.304595
0.334	0.0864716	1.07607	0.439807	0.429989	0.929004	0.770162	1.37447	0.810113	0.357897
0.335	0.123647	1.117	0.512743	0.579488	0.959756	0.832823	1.25728	0.861455	0.413021
0.336	0.160922	1.1521	0.585834	0.684703	0.99058	0.888489	1.09713	0.912451	0.468077
0.337	0.192707	1.17855	0.656189	0.746925	1.02309	0.937092	0.900316	0.965285	0.521312
0.338	0.212574	1.19261	0.721525	0.77161	1.05811	0.979704	0.676809	1.02137	0.571391
0.339	0.216405	1.18877	0.78056	0.766664	1.09559	1.01822	0.438579	1.08089	0.617738
0.34	0.204466	1.15929	0.83322	0.741102	1.1344	1.05457	0.197704	1.14267	0.660698
0.341	0.180918	1.09592	0.88049	0.703779	1.1719	1.09011	-0.0354216	1.20425	0.701442
0.342	0.152534	0.992854	0.923941	0.66248	1.20337	1.12562	-0.253311	1.26228	0.741478
0.343	0.126919	0.848923	0.964982	0.623513	1.22156	1.16121	-0.452219	1.31294	0.782065
0.344	0.109626	0.668126	1.0043	0.591467	1.21759	1.19639	-0.632105	1.35156	0.823758
0.345	0.103854	0.458859	1.04171	0.569427	1.18335	1.23003	-0.795347	1.37183	0.866032
0.346	0.113248	0.232394	1.07618	0.559876	1.11393	1.25967	-0.944813	1.36583	0.907324
0.347	0.14197	0.000921731	1.106	0.565294	1.00896	1.28045	-1.0821	1.32565	0.944616
0.348	0.192099	-0.224556	1.12919	0.587751	0.872517	1.28506	-1.2066	1.24569	0.97127
0.349	0.262043	-0.435997	1.14379	0.628043	0.711976	1.26541	-1.31554	1.12424	0.976587
0.35	0.346273	-0.629192	1.14766	0.684694	0.536194	1.21508	-1.40465	0.963995	0.949821
0.351	0.436859	-0.803501	1.13739	0.752732	0.353746	1.13107	-1.46915	0.771673	0.884036
0.352	0.525774	-0.960446	1.10739	0.822907	0.171426	1.01434	-1.50486	0.556999	0.776678
0.353	0.605722	-1.10175	1.0508	0.882943	-0.00675442	0.869251	-1.50909	0.33112	0.629214
0.354	0.669356	-1.22787	0.961918	0.920557	-0.179972	0.702494	-1.4813	0.104689	0.446971
0.355	0.708715	-1.33735	0.838376	0.926411	-0.350073	0.521532	-1.42319	-0.113753	0.238122
0.356	0.717517	-1.42693	0.682115	0.895944	-0.519799	0.333037	-1.33845	-0.318735	0.0119239
0.357	0.695053	-1.49236	0.499179	0.829792	-0.690445	0.141568	-1.23225	-0.508151	-0.222138
0.358	0.647165	-1.52958	0.29855	0.732877	-0.860242	-0.0511321	-1.11063	-0.682347	-0.454266
0.359	0.583396	-1.53578	0.0903823	0.612843	-1.024	-0.245722	-0.980033	-0.842406	-0.674715
0.36	0.513511	-1.51003	-0.115833	0.478323	-1.1739	-0.443677	-0.846696	-0.989026	-0.875034
0.361	0.446165	-1.45358	-0.312702	0.337355	-1.3009	-0.645401	-0.716126	-1.12196	-1.04984
0.362	0.386395	-1.36999	-0.495884	0.196007	-1.39635	-0.848732	-0.592788	-1.23968	-1.19797
0.363	0.334177	-1.26457	-0.664482	0.0570351	-1.45369	-1.04814	-0.479993	-1.33947	-1.32219
0.364	0.290651	-1.14363	-0.820141	-0.0802679	-1.46977	-1.2351	-0.380014	-1.41789	-1.4276
0.365	0.260947	-1.0138	-0.964904	-0.21833	-1.44515	-1.39953	-0.294186	-1.4714	-1.5193
0.366	0.248872	-0.881599	-1.09935	-0.359191	-1.38373	-1.53157	-0.22285	-1.49722	-1.60051
0.367	0.254458	-0.752933	-1.22194	-0.503018	-1.29214	-1.62328	-0.165454	-1.49398	-1.67212
0.368	0.274877	-0.632528	-1.32907	-0.646876	-1.17877	-1.66966	-0.120744	-1.46206	-1.73262
0.369	0.305823	-0.523827	-1.4157	-0.784581	-1.05242	-1.66934	-0.0869616	-1.40364	-1.77831
0.37	0.342985	-0.42899	-1.47653	-0.908196	-0.921349	-1.62462	-0.0622056	-1.32244	-1.80429
0.371	0.381552	-0.348885	-1.50719	-1.00988	-0.792698	-1.54086	-0.0447156	-1.22315	-1.80576
0.372	0.415874	-0.283267	-1.50522	-1.08309	-0.672053	-1.4256	-0.0329146	-1.11106	-1.77908
0.373	0.441822	-0.231094	-1.47043	-1.12311	-0.563111	-1.28769	-0.0254332	-0.99166	-1.72264
0.374	0.458695	-0.190876	-1.40506	-1.12748	-0.467797	-1.1362	-0.0210675	-0.870309	-1.63727
0.375	0.468837	-0.160866	-1.3134	-1.09663	-0.38659	-0.979793	-0.018707	-0.751837	-1.52633
0.376	0.476062	-0.139168	-1.20111	-1.03388	-0.318937	-0.826094	-0.0173641	-0.640064	-1.39567
0.377	0.483586	-0.123916	-1.07464	-0.944736	-0.263591	-0.681317	-0.0162857	-0.537544	-1.25277
0.378	0.492741	-0.113375	-0.940746	-0.836255	-0.218805	-0.550015	-0.0150823	-0.445779	-1.10537
0.379	0.504247	-0.105989	-0.805909	-0.716348	-0.182624	-0.434973	-0.0136434	-0.365473	-0.9602
0.38	0.520894	-0.100493	-0.675859	-0.591425	-0.153211	-0.337261	-0.0119012	-0.296709	-0.822291
0.381	0.546748	-0.0959154	-0.555261	-0.462297	-0.12899	-0.256719	-0.00983095	-0.239116	-0.695035
0.382	0.583945	-0.0915896	-0.447434	-0.322705	-0.108635	-0.192471	-0.00755224	-0.191928	-0.580381
0.383	0.631717	-0.0871717	-0.354214	-0.165587	-0.0910138	-0.143057	-0.00525393	-0.154057	-0.479106
0.384	0.686483	-0.0824235	-0.276139	0.00760596	-0.0752443	-0.106479	-0.00308507	-0.124265	-0.391125
0.385	0.74247	-0.0771663	-0.212854	0.18353	-0.0607857	-0.0802777	-0.00116517	-0.101287	-0.315844
0.386	0.793798	-0.0714882	-0.163364	0.340895	-0.0473611	-0.0618255	0.000361046	-0.0838827	-0.252323
0.387	0.834971	-0.0656648	-0.126172	0.46058	-0.0348693	-0.0488307	0.00136413	-0.0708572	-0.199286
0.388	0.859915	-0.0599016	-0.0994018	0.537529	-0.0232987	-0.0395658	0.00180768	-0.0610792	-0.155255
0.389	0.863519	-0.0543337	-0.0809427	0.585065	-0.0126727	-0.0327313	0.00171532	-0.0534994	-0.118795
0.39	0.844679	-0.0491578	-0.0687539	0.628587	-0.0031745	-0.0273375	0.00113339	-0.0472249	-0.0886751
0.391	0.80762	-0.0445311	-0.0610284	0.691399	0.00492321	-0.022722	0.000147553	-0.0416614	-0.0638844
0.392	0.760336	-0.0405039	-0.0561272	0.783341	0.0115834	-0.0184868	-0.0010676	-0.0365814	-0.0435384
0.393	0.711484	-0.0371341	-0.0526161	0.902009	0.0170103	-0.0143227	-0.00224565	-0.0320086	-0.0267588
0.394	0.668102	-0.0344125	-0.0494226	1.03837	0.0213641	-0.00996408	-0.00320037	-0.0280303	-0.0126909
0.395	0.629202	-0.032199	-0.0459707	1.1804	0.0246704	-0.00529714	-0.00391816	-0.0246828	-0.000752089
0.396	0.573214	-0.0304168	-0.0421349	1.31611	0.0269814	-0.000422159	-0.00441818	-0.0219079	0.00929284
0.397	0.468208	-0.0290894	-0.0379784	1.43446	0.0284536	0.00442951	-0.00467668	-0.0195548	0.0176136
0.398	0.311429	-0.0281729	-0.0335708	1.52566	0.0292749	0.00896635	-0.00474082	-0.0174817	0.024473
0.399	0.14035	-0.0275435	-0.0289929	1.58307	0.0296583	0.0128597	-0.00474163	-0.0155941	0.0301558
0.4	0.000850476	-0.0270925	-0.0243246	1.60488	0.0298413	0.0158906	-0.00475735	-0.0137497	0.0349695
0.401	-0.0853037	-0.0268263	-0.0197139	1.59356	0.0300171	0.0180624	-0.00486416	-0.0118173	0.0391462
0.402	-0.131263	-0.0267958	-0.0155124	1.55401	0.0303003	0.0194902	-0.00522813	-0.00982819	0.0427023
0.403	-0.162022	-0.0268494	-0.0121375	1.49153	0.0306939	0.0202508	-0.0059056	-0.00797826	0.0455924
0.404	-0.193608	-0.0267278	-0.00977468	1.41029	0.0310794	0.0203577	-0.00673936	-0.00648079	0.0478705
0.405	-0.245725	-0.0263562	-0.00835221	1.31368	0.0312937	0.0198299	-0.00754628	-0.00544387	0.0496651
0.406	-0.335848	-0.025837	-0.00775667	1.2066	0.0311942	0.0187605	-0.00816954	-0.0049165	0.0511051
0.407	-0.451095	-0.0253082	-0.00782265	1.09658	0.0306612	0.0173041	-0.00849537	-0.00490153	0.0522588
0.408	-0.550788	-0.0248753	-0.00828284	0.991906	0.0295945	0.015618	-0.0085844	-0.00530961	0.053152
0.409	-0.593752	-0.0246062	-0.00896812	0.898083	0.0279821	0.0138781	-0.00859475	-0.00605622	0.053802
0.41	-0.557975	-0.0245435	-0.00976074	0.815351	0.0259472	0.0122956	-0.00861351	-0.00708887	0.0542578
0.411	-0.443887	-0.0246834	-0.010447	0.739046	0.0235855	0.0110464	-0.00863377	-0.00825802	0.054609
0.412	-0.267155	-0.024938	-0.0108601	0.664413	0.0208622	0.0102081	-0.00859581	-0.00937216	0.0548983
0.413	-0.04985	-0.0252206	-0.0109605	0.591584	0.0178631	0.00968283	-0.00848025	-0.0103405	0.0550649
0.414	0.185679	-0.0255708	-0.0108409	0.52457	0.0149107	0.00920737	-0.00831579	-0.0110713	0.0549934
0.415	0.426197	-0.02607	-0.0107344	0.467486	0.0123049	0.00854638	-0.00811701	-0.0113537	0.0546117
0.416	0.675502	-0.026693	-0.0108137	0.421269	0.0102155	0.00763343	-0.0079563	-0.0109927	0.0539911
0.417	0.940705	-0.0273212	-0.0109963	0.382348	0.00882234	0.00652523	-0.00795198	-0.0100239	0.0533382
0.418	1.21207	-0.0278727	-0.0110501	0.346305	0.00833683	0.00529288	-0.00812019	-0.00873317	0.0527527
0.419	1.46523	-0.0283126	-0.010794	0.311794	0.00880465	0.00401952	-0.00832053	-0.0074604	0.0521149
0.42	1.67502	-0.0285421	-0.0101202	0.279984	0.0100664	0.00286197	-0.00835485	-0.00643196	0.0512945
0.421	1.83568	-0.0284357	-0.00902113	0.253002	0.0119492	0.00202199	-0.0081356	-0.00574443	0.0502582
0.422	1.97774	-0.0279967	-0.00771961	0.233172	0.0142038	0.00165373	-0.00771087	-0.00540443	0.0490047
0.423	2.1407	-0.0273997	-0.00654669	0.222304	0.0163999	0.00183587	-0.00714378	-0.00540605	0.0475325
0.424	2.32809	-0.026858	-0.00565147	0.221337	0.018184	0.00252076	-0.00641901	-0.00576283	0.0458822
0.425	2.50718	-0.0264531	-0.00494153	0.230102	0.0194856	0.00347389	-0.00552957	-0.00641476	0.0441635
0.426	2.63675	-0.0261713	-0.00422258	0.246897	0.0203909	0.00444206	-0.00463638	-0.00721592	0.0425025
0.427	2.68708	-0.0260875	-0.00339434	0.268176	0.0209225	0.005303	-0.00399768	-0.00803521	0.0409746
0.428	2.64793	-0.0263167	-0.00251862	0.289301	0.0210198	0.005964	-0.00379042	-0.00879992	0.0395748
0.429	2.52505	-0.0268356	-0.00172887	0.305132	0.0206922	0.00636518	-0.00401851	-0.00950527	0.0382271
0.43	2.33214	-0.0275104	-0.00113604	0.309457	0.0200058	0.00657058	-0.00449451	-0.0102216	0.0368597
0.431	2.08662	-0.0281891	-0.000771593	0.297559	0.0190379	0.00667281	-0.00495239	-0.0109904	0.0354762
0.432	1.80862	-0.0287892	-0.000644704	0.270459	0.0179933	0.0066773	-0.00517598	-0.0116981	0.034087
0.433	1.51951	-0.0292969	-0.000790251	0.233838	0.0171375	0.00647078	-0.00503603	-0.0121838	0.0326862
0.434	1.24018	-0.029628	-0.00123839	0.193915	0.0165766	0.0059413	-0.00451602	-0.0124063	0.0313048
0.435	0.989378	-0.0296834	-0.00197982	0.155746	0.0162332	0.00520694	-0.00372954	-0.0123335	0.0300182
0.436	0.781285	-0.0294687	-0.00289381	0.123588	0.0160004	0.00456348	-0.00289823	-0.0118938	0.0289316
0.437	0.622983	-0.0290687	-0.00381627	0.101204	0.0158267	0.00420788	-0.00222444	-0.0112527	0.0280326
0.438	0.51506	-0.0286146	-0.0046743	0.0913303	0.0156032	0.0041553	-0.00174742	-0.0107951	0.0271591
0.439	0.45482	-0.0281828	-0.00541789	0.0949103	0.0151065	0.00435204	-0.00140617	-0.0107264	0.026149
0.44	0.436641	-0.027762	-0.0059374	0.110933	0.0141223	0.00471658	-0.00114674	-0.0110053	0.0249396
0.441	0.450625	-0.0273766	-0.00612987	0.136698	0.0126027	0.0051154	-0.000887426	-0.0115197	0.0236041
0.442	0.485988	-0.0270733	-0.0060097	0.168382	0.0107665	0.0054119	-0.000572287	-0.0120924	0.0223108
0.443	0.536978	-0.0268617	-0.00571437	0.202239	0.00894061	0.00548863	-0.00021962	-0.012523	0.0212877
0.444	0.601922	-0.0267581	-0.00534382	0.235577	0.00737338	0.00528879	0.000169758	-0.0127178	0.0207396
0.445	0.675462	-0.0267219	-0.00487764	0.266705	0.00627955	0.00484621	0.000529745	-0.0126949	0.0206356
0.446	0.750058	-0.0266016	-0.00425114	0.294465	0.00578663	0.00412221	0.000721095	-0.0124603	0.0206025
0.447	0.832186	-0.0262494	-0.00340327	0.317738	0.00587812	0.00303275	0.00076555	-0.0119814	0.0201932
0.448	0.946374	-0.0256815	-0.0023695	0.335194	0.00654558	0.00172212	0.000830061	-0.0113252	0.0192779
0.449	1.11402	-0.0250779	-0.00134695	0.345659	0.00780956	0.000482341	0.00102879	-0.0106515	0.0180283
0.45	1.33522	-0.0245754	-0.000525479	0.348544	0.00958604	-0.000515687	0.00131118	-0.0100855	0.016632
0.451	1.59084	-0.0241784	-1.28121e-05	0.343888	0.0116868	-0.00121264	0.0014885	-0.00965906	0.0151339
0.452	1.85217	-0.023873	3.42468e-05	0.332527	0.0139156	-0.00159031	0.00140393	-0.00928803	0.0134918
0.453	2.08718	-0.0236652	-0.000479908	0.316052	0.0160991	-0.00169173	0.00101498	-0.0088881	0.0117778
0.454	2.26459	-0.0234943	-0.00140781	0.295569	0.0180452	-0.00159686	0.000363862	-0.00850512	0.0101498
0.455	2.36088	-0.0232717	-0.00251248	0.270481	0.0195905	-0.00138796	-0.000450688	-0.0082993	0.00867726
0.456	2.36732	-0.0230657	-0.00365532	0.239972	0.0207105	-0.00114749	-0.0012503	-0.00842541	0.00741409
0.457	2.2897	-0.0230113	-0.00480477	0.205335	0.0214533	-0.000873753	-0.00178322	-0.00891811	0.0064085
0.458	2.14288	-0.0230576	-0.00597928	0.169635	0.0218262	-0.000388396	-0.00189851	-0.0096944	0.00565257
0.459	1.94594	-0.0230744	-0.00715805	0.13587	0.0218485	0.000518783	-0.00165437	-0.0105801	0.00517027
0.46	1.71874	-0.0230071	-0.00824671	0.105768	0.0216696	0.00190019	-0.00119497	-0.01134	0.00497819
0.461	1.47926	-0.0227951	-0.0091266	0.0791921	0.0214998	0.00369514	-0.000596057	-0.0117267	0.00506157
0.462	1.24258	-0.0224011	-0.00970169	0.0539709	0.0213986	0.00579984	0.000135819	-0.0115278	0.00542886
0.463	1.02083	-0.0219018	-0.00989696	0.0268674	0.0213092	0.00805743	0.0010029	-0.0107104	0.00594549
0.464	0.823477	-0.0214079	-0.0096453	-0.0041442	0.0212168	0.010293	0.00200128	-0.00953639	0.00625667
0.465	0.657647	-0.0209965	-0.00894387	-0.0379395	0.0211308	0.0123647	0.00302897	-0.00837547	0.00607225
0.466	0.527875	-0.0207035	-0.00796773	-0.0706532	0.0210463	0.0141415	0.00388945	-0.00739417	0.00534956
0.467	0.435163	-0.0204794	-0.00702107	-0.0980247	0.0209588	0.015508	0.00455459	-0.00657254	0.00426597
0.468	0.376318	-0.020224	-0.00630586	-0.117511	0.0208645	0.0165186	0.0052308	-0.00595658	0.0031853
0.469	0.344839	-0.0198939	-0.00586697	-0.12951	0.0207645	0.0173857	0.00605135	-0.00565331	0.00244765
0.47	0.333207	-0.0195059	-0.00566426	-0.137484	0.0206996	0.0181772	0.00691573	-0.00557009	0.00209038
0.471	0.334772	-0.0190526	-0.00555325	-0.145507	0.020784	0.0186921	0.00765961	-0.00541947	0.0018873
0.472	0.344097	-0.0185419	-0.00541405	-0.154994	0.0211489	0.0187122	0.00824623	-0.00504629	0.00163554
0.473	0.356748	-0.018101	-0.00528589	-0.164342	0.0217734	0.0182873	0.00873379	-0.0045211	0.00131339
0.474	0.369326	-0.0179166	-0.00524651	-0.171055	0.0224493	0.0176431	0.00912575	-0.00394735	0.00102226
0.475	0.37952	-0.0180909	-0.0052893	-0.173538	0.0229804	0.0169219	0.00945361	-0.00336301	0.000822358
0.476	0.386054	-0.0185447	-0.00535437	-0.171317	0.023288	0.0161785	0.00987178	-0.00284016	0.000693762
0.477	0.388434	-0.0190435	-0.00546071	-0.164707	0.0233496	0.0154366	0.0105402	-0.00255762	0.000667235
0.478	0.38661	-0.0193972	-0.00573965	-0.154853	0.0231663	0.014685	0.0115428	-0.00264007	0.000764463
0.479	0.38078	-0.0195417	-0.006283	-0.143264	0.0227835	0.0139033	0.012856	-0.00301042	0.000922667
0.48	0.371344	-0.0194824	-0.007036	-0.130833	0.0222759	0.0130365	0.0143725	-0.00346582	0.00111502
0.481	0.358865	-0.0193065	-0.00785733	-0.117731	0.0216822	0.0120129	0.0158955	-0.00386893	0.00137725
0.482	0.343927	-0.0191173	-0.00858078	-0.104128	0.021041	0.0108725	0.0170771	-0.00419974	0.00174611
0.483	0.327109	-0.018898	-0.00905156	-0.0907365	0.0204348	0.00974525	0.0176474	-0.004446	0.00220714
0.484	0.308988	-0.0185717	-0.00922155	-0.0785696	0.0199094	0.00866188	0.0176577	-0.00461058	0.00272217
0.485	0.29002	-0.0181635	-0.00915341	-0.0680576	0.0195015	0.0075324	0.017262	-0.00476864	0.00326641
0.486	0.270614	-0.0177331	-0.00891788	-0.0585272	0.019335	0.00630072	0.0164993	-0.0049611	0.00375107
0.487	0.25124	-0.0172811	-0.00855107	-0.048856	0.0195026	0.00506057	0.015365	-0.00505292	0.0040223
0.488	0.232433	-0.0167694	-0.0080947	-0.0388485	0.01999	0.00399507	0.0138667	-0.00482864	0.00398749
0.489	0.214817	-0.0161239	-0.00760471	-0.0298007	0.0207497	0.00320284	0.0120738	-0.00424357	0.00367266
0.49	0.199069	-0.0153528	-0.00712674	-0.0235126	0.0216396	0.00269204	0.0101598	-0.00346904	0.00312563
0.491	0.185765	-0.0146024	-0.00669825	-0.0209817	0.0224867	0.00248891	0.00828512	-0.00270617	0.00238258
0.492	0.175314	-0.0139874	-0.00633872	-0.0220397	0.0232774	0.00262972	0.00655488	-0.00207441	0.00154335
0.493	0.16794	-0.0135129	-0.00607235	-0.0258009	0.0241267	0.00310261	0.00510838	-0.00163427	0.00071194
0.494	0.163672	-0.013211	-0.00589822	-0.0310618	0.0251678	0.0038197	0.00407412	-0.00134695	-8.24057e-05
0.495	0.162276	-0.0131375	-0.00567825	-0.036474	0.0264623	0.00460715	0.00350733	-0.00107079	-0.000840234
0.496	0.162902	-0.013164	-0.00522099	-0.0411298	0.0279308	0.00527087	0.00342077	-0.00070578	-0.0015455
0.497	0.163966	-0.0130529	-0.00447458	-0.0450793	0.0293811	0.00571259	0.00383972	-0.000244992	-0.00218039
0.498	0.164043	-0.0127802	-0.0035563	-0.0489953	0.0306097	0.00594029	0.00477363	0.000236284	-0.0028299
0.499	0.162897	-0.0125644	-0.00269116	-0.0535703	0.031484	0.00597813	0.00609584	0.000599149	-0.00375482
0.5	0.161381	-0.0126001	-0.0021004	-0.0591737	0.031898	0.00581935	0.00765228	0.000858473	-0.00527532
0.501	0.160639	-0.0128455	-0.00184521	-0.0657333	0.0317555	0.00544254	0.00938929	0.00126272	-0.0075644
0.502	0.16148	-0.0130856	-0.00182654	-0.072893	0.0311463	0.00488182	0.0111546	0.00201118	-0.0105352
0.503	0.164107	-0.0131605	-0.00190852	-0.0802532	0.0303026	0.00423376	0.01259	0.00309076	-0.0138886
0.504	0.168229	-0.0129947	-0.00197758	-0.0873963	0.0293581	0.00356177	0.0132869	0.00441005	-0.0173064
0.505	0.173283	-0.0124881	-0.0020251	-0.0936794	0.0283975	0.00297745	0.0129713	0.00588706	-0.0207383
0.506	0.178594	-0.0115826	-0.00208153	-0.0981326	0.0275383	0.00271178	0.0116187	0.00734882	-0.0243675
0.507	0.183627	-0.0103736	-0.00204241	-0.0998184	0.0268455	0.00294684	0.00943554	0.00854222	-0.0281183
0.508	0.188041	-0.00909164	-0.00184749	-0.0982542	0.0262736	0.00374349	0.00672727	0.0092931	-0.0314443
0.509	0.191494	-0.0079616	-0.00161208	-0.0934731	0.0256881	0.00509534	0.00370143	0.00949935	-0.0336955
0.51	0.193684	-0.00705358	-0.00140843	-0.0859228	0.0249887	0.00689279	0.000370945	0.0091568	-0.0344597
0.511	0.194603	-0.00635903	-0.00119791	-0.0763638	0.0242163	0.00890564	-0.00315009	0.00847807	-0.0335972
0.512	0.194534	-0.00591614	-0.00094361	-0.0657302	0.0234758	0.0109062	-0.00631336	0.00770011	-0.0312507
0.513	0.19392	-0.00578801	-0.000663528	-0.0548809	0.0228654	0.0127654	-0.00834047	0.00689919	-0.0278058
0.514	0.193311	-0.006002	-0.000384603	-0.0444131	0.022471	0.0144313	-0.00867604	0.00619291	-0.0236735
0.515	0.193104	-0.00645513	-8.31684e-05	-0.0347399	0.0222775	0.0158229	-0.00719309	0.00580626	-0.0191799
0.516	0.193359	-0.00689849	0.000250727	-0.0262979	0.0222508	0.0167838	-0.00413682	0.00585066	-0.0146291
0.517	0.19385	-0.00709098	0.000562264	-0.0195635	0.0224578	0.0172407	7.569e-05	0.00629672	-0.0102814
0.518	0.194133	-0.00695582	0.000840217	-0.0146753	0.0229386	0.0173595	0.00504654	0.00708647	-0.00623414
0.519	0.193855	-0.00656963	0.00118377	-0.0111286	0.0235998	0.017434	0.0103834	0.00813552	-0.00251881
0.52	0.193103	-0.00604548	0.00160304	-0.00803935	0.024186	0.0176023	0.0156677	0.00930645	0.000692102
0.521	0.192202	-0.00550384	0.00192842	-0.0046591	0.0243992	0.0177369	0.0205352	0.0104161	0.00317849
0.522	0.191314	-0.00509386	0.00200831	-0.000729399	0.0241998	0.0175684	0.0246951	0.0113053	0.00483002
0.523	0.190441	-0.00493467	0.00181913	0.0034895	0.0238449	0.0168836	0.0279691	0.0118872	0.00566963
0.524	0.189664	-0.00510014	0.00149976	0.00755616	0.0235707	0.0156989	0.0303468	0.012081	0.00594718
0.525	0.189205	-0.00564476	0.00123397	0.0111693	0.0233949	0.0142655	0.031877	0.0118324	0.0060717
0.526	0.189181	-0.00652269	0.00108894	0.0141018	0.0232438	0.0128652	0.0325945	0.0112035	0.0062675
0.527	0.189406	-0.00756305	0.00110596	0.015961	0.0231082	0.0116795	0.0325958	0.0103304	0.00648839
0.528	0.189469	-0.00861781	0.00132168	0.0162741	0.0230097	0.0108848	0.0320362	0.00937185	0.00670129
0.529	0.189022	-0.00967413	0.00170535	0.0148874	0.0229279	0.0105998	0.0311128	0.00850501	0.00702875
0.53	0.188008	-0.0107595	0.00218325	0.011947	0.022892	0.0107	0.0300451	0.00786891	0.00765692
0.531	0.186545	-0.0117931	0.00263697	0.00755729	0.0229712	0.010895	0.0289868	0.00749897	0.00869622
0.532	0.184715	-0.0125783	0.00291872	0.00194906	0.0231114	0.0109355	0.0280467	0.00734615	0.0100631
0.533	0.182555	-0.0128042	0.00289635	-0.00436459	0.0232204	0.0107272	0.0273069	0.00734016	0.0114822
0.534	0.180131	-0.0121096	0.00251154	-0.010884	0.0233469	0.0103322	0.0267385	0.00741655	0.0126489
0.535	0.177642	-0.010343	0.0018501	-0.0171717	0.023674	0.0098252	0.0261834	0.00754664	0.0134377
0.536	0.175335	-0.00769039	0.00112846	-0.0226036	0.0243456	0.00923582	0.0255129	0.00776396	0.0138808
0.537	0.173317	-0.00452024	0.000527238	-0.0262572	0.0252879	0.00869697	0.0247601	0.0081582	0.0140023
0.538	0.171568	-0.00119406	8.48684e-05	-0.027184	0.0263255	0.00842901	0.0239672	0.0087699	0.0139033
0.539	0.170083	0.00198289	-0.000229975	-0.0249002	0.0274059	0.00854844	0.0230588	0.00941472	0.0137955
0.54	0.168901	0.00475771	-0.000484463	-0.0196233	0.0285108	0.00902902	0.0220017	0.00978683	0.0137284
0.541	0.168078	0.00697095	-0.00065011	-0.0122014	0.0294798	0.00977481	0.0209596	0.00970734	0.0135547
0.542	0.167596	0.00854001	-0.000502058	-0.00370583	0.0301274	0.0107076	0.0201708	0.00911056	0.0132368
0.543	0.16727	0.00940122	8.53104e-05	0.00516219	0.0304386	0.0118164	0.0197388	0.0079971	0.0130433
0.544	0.166834	0.00955555	0.000976768	0.0142057	0.0305173	0.0130866	0.0196476	0.00651075	0.0133302
0.545	0.166056	0.00909522	0.00196855	0.0233524	0.0304447	0.0144519	0.0198669	0.00498626	0.0141307
0.546	0.164747	0.00818497	0.00287512	0.0323268	0.0302602	0.0158509	0.0203335	0.00380101	0.0151419
0.547	0.162917	0.00720099	0.0035476	0.0407199	0.0300042	0.0172029	0.0209367	0.00310431	0.0160512
0.548	0.160924	0.00670476	0.00391165	0.0480316	0.0297063	0.0183513	0.0216107	0.00285576	0.0167291
0.549	0.159217	0.00700729	0.00389073	0.0534517	0.0293763	0.0191621	0.0223694	0.00299398	0.0171999
0.55	0.158075	0.00796366	0.0033857	0.0561724	0.0290722	0.0196089	0.0231172	0.00338666	0.0174233
0.551	0.15758	0.00924247	0.00240601	0.0561274	0.0288724	0.0197313	0.0235365	0.00381662	0.0171918
0.552	0.157661	0.0105168	0.00114309	0.0540357	0.0288133	0.0196097	0.0233707	0.00399456	0.0164581
0.553	0.158284	0.0114728	-0.000163617	0.0508036	0.0289258	0.0193705	0.0226586	0.00348254	0.0155253
0.554	0.159515	0.0118648	-0.00147972	0.0470053	0.0291529	0.0192723	0.0216254	0.00176475	0.0147214
0.555	0.161274	0.0115661	-0.00293976	0.0425348	0.0293179	0.0197202	0.020565	-0.00143767	0.0142074
0.556	0.163299	0.0105613	-0.00456944	0.0366253	0.0293129	0.0208864	0.0197029	-0.00602086	0.0140897
0.557	0.165301	0.00897549	-0.00623318	0.028635	0.0291699	0.0225356	0.0190711	-0.0117849	0.0143375
0.558	0.167059	0.00700143	-0.00777875	0.019035	0.0289612	0.0243395	0.0186257	-0.0185373	0.0147241
0.559	0.168409	0.00470311	-0.0090831	0.00961977	0.0287388	0.0259906	0.0183915	-0.0258342	0.0151013
0.56	0.169019	0.00211192	-0.00998334	0.00288493	0.0285487	0.0271858	0.0184362	-0.0330012	0.0154826
0.561	0.168338	-0.000574663	-0.0103452	0.00115692	0.028393	0.0277349	0.0187756	-0.0397265	0.0158471
0.562	0.166033	-0.00312473	-0.0101133	0.00588425	0.0282203	0.0275333	0.0193188	-0.0464307	0.0161369
0.563	0.162275	-0.00538524	-0.00925885	0.0172751	0.0279466	0.0265095	0.0198925	-0.053333	0.0162657
0.564	0.15757	-0.00716908	-0.00795873	0.0342631	0.0274071	0.0247711	0.0202836	-0.0594879	0.0160768
0.565	0.152459	-0.00827405	-0.00674071	0.0546748	0.0264847	0.0226486	0.0202984	-0.0633352	0.0154678
0.566	0.147329	-0.00866952	-0.00629782	0.0757101	0.0253231	0.0204705	0.0198694	-0.0636796	0.0144362
0.567	0.142351	-0.00856598	-0.00729596	0.0946832	0.0242204	0.0184105	0.0190931	-0.060087	0.0130545
0.568	0.137535	-0.00817832	-0.0101933	0.109597	0.0233565	0.0165153	0.0181635	-0.0528297	0.0114662
0.569	0.132877	-0.00750938	-0.0149141	0.119373	0.0227153	0.0147836	0.0172588	-0.0426595	0.00983073
0.57	0.128455	-0.00656611	-0.0206714	0.123777	0.0221992	0.013229	0.0164255	-0.0306824	0.00831051
0.571	0.124355	-0.00550707	-0.0262269	0.123185	0.0217145	0.0118857	0.0156386	-0.0182	0.00698211
0.572	0.120384	-0.00439399	-0.0304916	0.11838	0.0211851	0.0108189	0.0149559	-0.00636597	0.00572875
0.573	0.115944	-0.00314144	-0.0329462	0.110323	0.0206183	0.0101431	0.0144618	0.00399324	0.00441495
0.574	0.110482	-0.00178135	-0.0334869	0.0999565	0.0201323	0.00997067	0.0141908	0.0123189	0.0031106
0.575	0.104154	-0.000476414	-0.0320934	0.0881284	0.0197975	0.0103161	0.0141892	0.0183541	0.00203694
0.576	0.0979336	0.000660277	-0.0288928	0.0753616	0.0194988	0.0110355	0.0145413	0.0221754	0.00137562
0.577	0.0931373	0.00151319	-0.0243223	0.0617959	0.01904	0.0119038	0.0152694	0.0240332	0.00120521
0.578	0.0908129	0.00192118	-0.0189457	0.0475623	0.0182791	0.0127871	0.0162477	0.0242714	0.00154221
0.579	0.0913567	0.00183793	-0.0132631	0.0329807	0.0171397	0.0136727	0.0173269	0.0233523	0.00235611
0.58	0.0944806	0.00134758	-0.00772099	0.018381	0.015629	0.0145258	0.0184259	0.0217432	0.00358444
0.581	0.0994673	0.000557435	-0.00275878	0.0040584	0.0138323	0.0152089	0.019503	0.0197753	0.00513548
0.582	0.10548	-0.000420371	0.00127163	-0.00953188	0.0118863	0.015586	0.0206061	0.0176153	0.00683664
0.583	0.111769	-0.00148559	0.0042742	-0.0218757	0.00992145	0.0156059	0.0218205	0.0154021	0.00847735
0.584	0.117831	-0.00248194	0.00637017	-0.0328251	0.00793356	0.0152006	0.0231409	0.0133642	0.00997474
0.585	0.123505	-0.00313154	0.00772348	-0.0425751	0.00582553	0.0142715	0.0244715	0.0117462	0.0112952
0.586	0.128974	-0.0032259	0.00850488	-0.0511909	0.00366985	0.0128949	0.0256591	0.0106816	0.0122183
0.587	0.134524	-0.00278213	0.00892695	-0.0584942	0.00184212	0.0113258	0.026551	0.0100547	0.0124892
0.588	0.140098	-0.00198078	0.00918206	-0.064357	0.000754472	0.00975827	0.0270558	0.00957127	0.0121573
0.589	0.14514	-0.00108068	0.00934116	-0.0688139	0.000426144	0.00823956	0.0271504	0.00899649	0.0114817
0.59	0.148915	-0.000357125	0.00934788	-0.0719214	0.000506782	0.00680859	0.0269015	0.00820886	0.0105664
0.591	0.150847	-1.97061e-05	0.00917783	-0.0737086	0.000682826	0.00559607	0.0264447	0.00720918	0.00939465
0.592	0.150547	-9.51102e-05	0.00893812	-0.0743867	0.000825878	0.00469603	0.0259055	0.00618991	0.00811532
0.593	0.147813	-0.000466297	0.00872652	-0.0745673	0.000861369	0.00407082	0.025389	0.00545327	0.00696253
0.594	0.142879	-0.00101513	0.00853711	-0.0749747	-7.85214e-05	0.00362613	0.0249787	0.00515752	0.00600775
0.595	0.136556	-0.00156824	0.00825736	-0.0759173	-0.00775193	0.00330888	0.0247066	0.00521983	0.00520323
0.596	0.129945	-0.00188337	0.00769838	-0.0771957	-0.0355201	0.00314373	0.0246366	0.00552794	0.00452935
0.597	0.124095	-0.00182316	0.00672164	-0.0783742	-0.0954913	0.00316776	0.0249173	0.00607048	0.00404382
0.598	0.119928	-0.00143298	0.00531396	-0.0791591	-0.186549	0.00335618	0.0256295	0.0067972	0.00392201
0.599	0.118146	-0.000879094	0.00362178	-0.0795839	-0.294433	0.00359543	0.0266898	0.00754002	0.00427006
0.6	0.119009	-0.000307045	0.00190771	-0.0797386	-0.399857	0.00374254	0.0279342	0.00810887	0.00491801
0.601	0.122282	0.000219561	0.000398447	-0.0795338	-0.485524	0.00375258	0.0291997	0.00837227	0.0056055
0.602	0.127507	0.000638644	-0.00081121	-0.079027	-0.539934	0.003679	0.0304376	0.00830272	0.00608042
0.603	0.134342	0.000899794	-0.00182717	-0.0787739	-0.558381	0.00355949	0.0317409	0.00798007	0.0061229
0.604	0.14245	0.000928657	-0.00286339	-0.0794774	-0.541994	0.00336401	0.0331754	0.00755118	0.00582095
0.605	0.151271	0.000590779	-0.00395899	-0.081477	-0.496005	0.00299903	0.0347143	0.00719968	0.00550004
0.606	0.160028	-0.000165033	-0.0048835	-0.0848172	-0.427954	0.00238335	0.0363007	0.00703944	0.00533227
0.607	0.167767	-0.00131431	-0.00532396	-0.089404	-0.346144	0.00153658	0.0378244	0.00706839	0.00529645
0.608	0.173464	-0.00286404	-0.00512087	-0.0948758	-0.258642	0.000549491	0.0391334	0.00722601	0.00531637
0.609	0.176303	-0.0047908	-0.00433621	-0.100565	-0.17258	-0.000432449	0.0401749	0.00738896	0.00530287
0.61	0.175853	-0.00696078	-0.00315492	-0.105716	-0.0935948	-0.00125438	0.0410029	0.00742804	0.00523919
0.611	0.172133	-0.00916062	-0.00174887	-0.109828	-0.0255965	-0.00191764	0.0416668	0.0072829	0.00517633
0.612	0.165704	-0.0111627	-0.000180114	-0.112792	0.0290582	-0.00253973	0.0421959	0.0070124	0.00511325
0.613	0.15767	-0.0127818	0.00151173	-0.114631	0.0693957	-0.00315581	0.0425711	0.00681873	0.00499919
0.614	0.149372	-0.0138596	0.00318331	-0.115233	0.0957633	-0.00375268	0.0426798	0.00685158	0.00478712
0.615	0.142016	-0.0142197	0.004678	-0.114413	0.10951	-0.00434897	0.042429	0.00707809	0.00445907
0.616	0.13649	-0.0137899	0.00589798	-0.112144	0.112656	-0.00489655	0.0418716	0.00738664	0.00403979
0.617	0.133283	-0.0126632	0.00678517	-0.108737	0.107698	-0.00527137	0.0411047	0.0076221	0.00362356
0.618	0.132393	-0.0109279	0.00737726	-0.104686	0.0972453	-0.00546634	0.0401558	0.00763987	0.00336206
0.619	0.133453	-0.00863132	0.00780897	-0.100398	0.0836363	-0.00568569	0.0390159	0.00739561	0.00324738
0.62	0.136086	-0.00597929	0.00821527	-0.0962414	0.0688046	-0.00616635	0.037655	0.00688827	0.00301079
0.621	0.139957	-0.00340486	0.00861769	-0.0926073	0.0542469	-0.00691415	0.0360814	0.00617929	0.00242047
0.622	0.144463	-0.00127261	0.00887856	-0.0898347	0.041005	-0.00768317	0.0344201	0.00546311	0.00148459
0.623	0.14854	0.000325964	0.00890814	-0.0881706	0.0297331	-0.00822219	0.0328397	0.00490878	0.000371765
0.624	0.150852	0.00138812	0.00884791	-0.0876059	0.0207679	-0.00843819	0.0314112	0.00450865	-0.000660479
0.625	0.150489	0.00186776	0.00884576	-0.087879	0.0141928	-0.00833498	0.0301225	0.00411424	-0.00145097
0.626	0.147439	0.00174133	0.00888765	-0.0889417	0.00997835	-0.00792309	0.0290407	0.00357369	-0.00200576
0.627	0.142336	0.00108828	0.0089186	-0.0910806	0.00789219	-0.00727404	0.0283095	0.00292335	-0.00228788
0.628	0.136228	5.54895e-05	0.00889166	-0.0944895	0.00733214	-0.00650246	0.0280122	0.00234535	-0.00226728
0.629	0.130381	-0.00127762	0.0088198	-0.0991176	0.00765586	-0.00562988	0.0281376	0.00192548	-0.00204309
0.63	0.126023	-0.00286384	0.00880995	-0.10464	0.00851308	-0.00467576	0.0285756	0.00163875	-0.00167485
0.631	0.124237	-0.00451486	0.00892196	-0.11047	0.00974009	-0.00377958	0.0291675	0.00151592	-0.0011668
0.632	0.125776	-0.00596532	0.00902465	-0.116117	0.0112454	-0.00314666	0.0298162	0.00162797	-0.000629387
0.633	0.1308	-0.00711544	0.00887725	-0.121327	0.0129373	-0.0030205	0.0304219	0.00195995	-0.000193149
0.634	0.138744	-0.00803301	0.00837403	-0.125871	0.0145883	-0.00354283	0.030801	0.00243702	0.00014612
0.635	0.148499	-0.00879001	0.00753681	-0.129491	0.0159043	-0.00454553	0.0308447	0.00297767	0.000477092
0.636	0.158945	-0.0094067	0.00634195	-0.132031	0.0167064	-0.00565915	0.0306129	0.00349895	0.000807163
0.637	0.169226	-0.00986154	0.00479001	-0.133694	0.0169613	-0.00660574	0.0301285	0.00391403	0.000970281
0.638	0.178577	-0.0101285	0.00309464	-0.135111	0.0167153	-0.00732659	0.0292973	0.00412233	0.000815588
0.639	0.186341	-0.0102239	0.00162753	-0.137172	0.0159631	-0.00786693	0.0281392	0.00404907	0.000420007
0.64	0.192185	-0.0102365	0.000615544	-0.140795	0.0146728	-0.00822572	0.0267909	0.00364979	-6.74312e-05
0.641	0.196087	-0.0103573	4.18108e-05	-0.146525	0.0129782	-0.00837795	0.0253525	0.00288391	-0.000613898
0.642	0.198136	-0.0108181	-0.000222257	-0.154231	0.0111215	-0.00831985	0.0239265	0.001749	-0.00115546
0.643	0.198462	-0.0116489	-0.00033608	-0.163178	0.00927452	-0.00802373	0.0226543	0.000319824	-0.0015465
0.644	0.19729	-0.0125861	-0.000339329	-0.172229	0.00753691	-0.00746949	0.0217231	-0.00118765	-0.00171709
0.645	0.194885	-0.0133795	-0.000127638	-0.18	0.00593554	-0.00670518	0.0213596	-0.00240625	-0.00158562
0.646	0.191559	-0.0140003	0.000316951	-0.185113	0.00441116	-0.00577286	0.0216975	-0.00305898	-0.00108597
0.647	0.187774	-0.0144901	0.000892139	-0.18666	0.00294983	-0.00470592	0.0225875	-0.00313346	-0.000425095
0.648	0.184033	-0.0148257	0.00149409	-0.184453	0.00160645	-0.00366472	0.0236151	-0.00272147	9.10677e-05
0.649	0.180714	-0.0149891	0.00201308	-0.178876	0.000451317	-0.00301739	0.0244213	-0.00188419	0.000358972
0.65	0.178019	-0.0150125	0.00233449	-0.170551	-0.000366	-0.00328357	0.024819	-0.000712464	0.000409848
0.651	0.175892	-0.0148685	0.00240174	-0.160058	-0.000711269	-0.00528239	0.0246619	0.000566053	0.000269927
0.652	0.173967	-0.0144282	0.00225805	-0.147824	-0.000553927	-0.0107131	0.0238845	0.00162743	-0.000102792
0.653	0.171647	-0.0135253	0.00205416	-0.134079	0.000135813	-0.0218483	0.0225644	0.00231136	-0.000753401
0.654	0.168201	-0.0121142	0.00203452	-0.119018	0.0012565	-0.0396527	0.0209354	0.00268571	-0.00156843
0.655	0.162913	-0.0103936	0.00240819	-0.103201	0.00240795	-0.0624823	0.019323	0.00277534	-0.00230983
0.656	0.155184	-0.00864315	0.0031804	-0.0877019	0.0031876	-0.0868231	0.0179653	0.00245994	-0.00281046
0.657	0.144552	-0.00708948	0.00419002	-0.0740231	0.00347979	-0.108804	0.0169822	0.00167094	-0.00301699
0.658	0.130794	-0.00599559	0.00528853	-0.0637442	0.00328558	-0.125181	0.0164431	0.000487216	-0.00290636
0.659	0.114016	-0.00563095	0.00644436	-0.0580468	0.00260177	-0.133806	0.016334	-0.000998139	-0.00249317
0.66	0.0947488	-0.00608604	0.00767634	-0.0575728	0.00159711	-0.133934	0.0165772	-0.00270481	-0.00182815
0.661	0.073918	-0.00723254	0.0089372	-0.0623877	0.000560862	-0.126186	0.0170338	-0.00439512	-0.00103568
0.662	0.0526222	-0.00882702	0.0101059	-0.0718422	-0.000376485	-0.112085	0.0174873	-0.00565088	-0.000394688
0.663	0.0319839	-0.0106315	0.0110332	-0.0846133	-0.00126263	-0.0935954	0.0178087	-0.00610917	-0.000121893
0.664	0.0129936	-0.0125306	0.0116323	-0.0990211	-0.00221268	-0.0727866	0.0179839	-0.0057144	-0.000152681
0.665	-0.00378036	-0.0144464	0.0119501	-0.113333	-0.00328309	-0.0516099	0.0179991	-0.00475311	-0.000296579
0.666	-0.0181709	-0.0161509	0.0121049	-0.125913	-0.00432995	-0.0317292	0.0178716	-0.00357981	-0.000455814
0.667	-0.0300878	-0.0173712	0.0122371	-0.135427	-0.00509681	-0.0143564	0.0176589	-0.00236873	-0.000635368
0.668	-0.0393443	-0.0180396	0.0124545	-0.141042	-0.00540442	-0.000242013	0.0174116	-0.00115347	-0.000886375
0.669	-0.0457084	-0.0182605	0.0127206	-0.14251	-0.00523064	0.0103084	0.0171485	8.5826e-05	-0.00128705
0.67	-0.0490403	-0.0181554	0.0129182	-0.140096	-0.00468061	0.0174232	0.016851	0.00127237	-0.00186062
0.671	-0.0494422	-0.0178319	0.0129453	-0.134441	-0.00396605	0.021469	0.016517	0.00217505	-0.00257176
0.672	-0.0473539	-0.0173434	0.0126592	-0.126433	-0.0033971	0.0228352	0.0161802	0.0026181	-0.00332973
0.673	-0.043486	-0.0166818	0.0119554	-0.117039	-0.00319882	0.0220067	0.0158408	0.00255967	-0.00393313
0.674	-0.0386199	-0.0159184	0.0109098	-0.107092	-0.00336436	0.0196379	0.0154003	0.00200582	-0.00423365
0.675	-0.0334741	-0.0152444	0.0096222	-0.0971474	-0.0037892	0.0163912	0.0147449	0.000965582	-0.00428223
0.676	-0.0287467	-0.0147909	0.00810102	-0.0874967	-0.00441722	0.0128606	0.0139323	-0.000507199	-0.0042348
0.677	-0.0251023	-0.0145383	0.00645073	-0.0782119	-0.00519138	0.00953399	0.0131364	-0.00216957	-0.00423638
0.678	-0.0229809	-0.0143701	0.00481583	-0.069158	-0.00596617	0.00672805	0.0124071	-0.00359554	-0.00435748
0.679	-0.0224861	-0.014202	0.00322779	-0.0601244	-0.00661286	0.00462823	0.0117196	-0.0044576	-0.00457608
0.68	-0.0233657	-0.0140485	0.00171173	-0.0508772	-0.00716124	0.00329413	0.0111634	-0.00471502	-0.00479581
0.681	-0.0251211	-0.013856	0.000284281	-0.0411953	-0.0076757	0.00267038	0.010881	-0.0044512	-0.00487151
0.682	-0.0273318	-0.0134433	-0.00105407	-0.0310893	-0.0081536	0.00271271	0.0109769	-0.00375738	-0.00465501
0.683	-0.0297687	-0.0126537	-0.00222868	-0.0208414	-0.00863907	0.00339541	0.0114351	-0.00285952	-0.0040528
0.684	-0.0322227	-0.0114173	-0.00313189	-0.01084	-0.00916179	0.00449558	0.0120547	-0.00201478	-0.00312539
0.685	-0.0345162	-0.00977489	-0.00374052	-0.00142779	-0.00957639	0.00556175	0.0125818	-0.00127641	-0.00209952
0.686	-0.0366448	-0.00788894	-0.00416754	0.007233	-0.00971452	0.00618961	0.0127968	-0.000546326	-0.00120676
0.687	-0.0387047	-0.00594091	-0.00448022	0.0150451	-0.00959818	0.0062196	0.0125533	0.000267262	-0.000628451
0.688	-0.0406863	-0.00408458	-0.00452317	0.0217385	-0.00939055	0.0058092	0.0119002	0.00109445	-0.000513325
0.689	-0.0424791	-0.00246936	-0.00411245	0.0270805	-0.0092177	0.00528829	0.0110886	0.00164811	-0.000902913
0.69	-0.043986	-0.00122771	-0.00323933	0.0310792	-0.00910175	0.00483352	0.0104107	0.0017109	-0.00173486
0.691	-0.0451145	-0.000474997	-0.00199649	0.0337794	-0.00910486	0.00447036	0.0100786	0.00135742	-0.00284538
0.692	-0.0457886	-0.000283225	-0.000541459	0.0351918	-0.00938059	0.00428967	0.010255	0.000747049	-0.00396958
0.693	-0.0459509	-0.000660154	0.000920552	0.0354185	-0.00998597	0.00443753	0.0110127	-5.30902e-05	-0.00487213
0.694	-0.0454807	-0.00158728	0.0022492	0.0347609	-0.0107452	0.00490702	0.012243	-0.000904075	-0.00540724
0.695	-0.0442699	-0.0030108	0.00341976	0.0336355	-0.0113307	0.00548147	0.0137145	-0.00152449	-0.00551232
0.696	-0.0424699	-0.00480215	0.00451661	0.0323348	-0.0115226	0.00592951	0.015149	-0.00175544	-0.0052428
0.697	-0.0404561	-0.00677967	0.00560609	0.0310384	-0.0114076	0.00608668	0.0162702	-0.00164447	-0.00471449
0.698	-0.0384853	-0.00873883	0.00660323	0.0299786	-0.0112569	0.00580875	0.0169477	-0.0012655	-0.0039881
0.699	-0.0365567	-0.0105057	0.00738567	0.0294193	-0.0112451	0.00504713	0.0172667	-0.000706507	-0.00305828
0.7	-0.0345538	-0.0119986	0.0078696	0.0295241	-0.0114098	0.00388838	0.0174096	-9.58041e-05	-0.00194901
0.701	-0.0324306	-0.0132021	0.00792126	0.0303137	-0.0117471	0.00242202	0.0175713	0.000499347	-0.000804155
0.702	-0.0302723	-0.0140675	0.00744904	0.0317551	-0.0122164	0.000686228	0.0178826	0.00104253	0.000142832
0.703	-0.0281606	-0.0144688	0.00648944	0.0337722	-0.0127638	-0.00122212	0.0182121	0.0014571	0.000698623
0.704	-0.0260782	-0.0143037	0.0051166	0.0361707	-0.0133226	-0.00312858	0.0182397	0.00176907	0.000814961
0.705	-0.0240934	-0.0135684	0.00344643	0.0387437	-0.0138021	-0.00487426	0.0178796	0.00208379	0.000500559
0.706	-0.0224528	-0.0123509	0.00161939	0.0414163	-0.0141317	-0.00632625	0.0173719	0.00230566	-0.000318593
0.707	-0.0213234	-0.0108284	-0.000263183	0.0442392	-0.0142752	-0.00732377	0.0169499	0.0021475	-0.00162069
0.708	-0.0206665	-0.00926382	-0.00203717	0.0473384	-0.014198	-0.0077234	0.0166437	0.00147817	-0.00311792
0.709	-0.0203539	-0.00794605	-0.00341522	0.0508232	-0.0138655	-0.00753495	0.0163536	0.000478471	-0.00445214
0.71	-0.0202488	-0.00705564	-0.0041551	0.0547186	-0.0132976	-0.00687678	0.0159905	-0.00058801	-0.00544228
0.711	-0.0202528	-0.00665539	-0.00418939	0.0590401	-0.0125203	-0.00584986	0.0155218	-0.00151037	-0.00608189
0.712	-0.0202803	-0.00675885	-0.00359132	0.063867	-0.0115123	-0.00460726	0.0149439	-0.00212273	-0.00641842
0.713	-0.0202598	-0.00728446	-0.00258387	0.069213	-0.0103022	-0.00336953	0.0143274	-0.0023829	-0.00658769
0.714	-0.0201861	-0.00804221	-0.00148237	0.0749062	-0.00896036	-0.002319	0.0137959	-0.00230617	-0.00681722
0.715	-0.0199654	-0.00885998	-0.000511287	0.0807169	-0.00759157	-0.00156287	0.0133679	-0.00187771	-0.00723675
0.716	-0.0193589	-0.00970775	0.00017548	0.0864905	-0.0064162	-0.0011028	0.0130162	-0.00113592	-0.00779138
0.717	-0.018191	-0.0105791	0.000429833	0.0920713	-0.00565606	-0.000836585	0.0128051	-0.000230786	-0.00837283
0.718	-0.0164414	-0.0113549	0.000243823	0.0971991	-0.00542775	-0.00071943	0.0128215	0.00066686	-0.00890638
0.719	-0.0141888	-0.0119445	-0.000193882	0.10163	-0.00575276	-0.000883654	0.0131284	0.00145741	-0.00933898
0.72	-0.0114881	-0.0123221	-0.00063913	0.105302	-0.00649762	-0.00144654	0.0137391	0.00208765	-0.0096386
0.721	-0.00834751	-0.012483	-0.000946984	0.108293	-0.00739563	-0.00228923	0.0145278	0.00252521	-0.00977333
0.722	-0.0048591	-0.0124904	-0.00107386	0.110695	-0.00814895	-0.00315834	0.0151934	0.00272067	-0.0096936
0.723	-0.00120342	-0.0123581	-0.000958947	0.11249	-0.00851254	-0.00386946	0.0154071	0.00263893	-0.00936317
0.724	0.00244203	-0.0120525	-0.000501765	0.113466	-0.00843704	-0.00433669	0.0150719	0.0023781	-0.00880424
0.725	0.00591445	-0.011745	0.00028703	0.113387	-0.00809742	-0.00448835	0.0143362	0.00211658	-0.00808711
0.726	0.00905154	-0.0117075	0.0011874	0.112151	-0.00778904	-0.00426994	0.013446	0.00196652	-0.00733517
0.727	0.011769	-0.0119903	0.00182851	0.109764	-0.00782335	-0.00372589	0.0126843	0.00192435	-0.00671372
0.728	0.0141927	-0.0125519	0.00189284	0.106369	-0.00842616	-0.00297324	0.012217	0.00190446	-0.00630014
0.729	0.0166499	-0.0134599	0.00140583	0.102287	-0.00973408	-0.00208294	0.0119704	0.00183291	-0.00604335
0.73	0.0194232	-0.0147342	0.000702943	0.0979884	-0.0117867	-0.00102485	0.0118224	0.00170482	-0.0058825
0.731	0.0225228	-0.0162327	9.29811e-05	0.0941244	-0.0144129	0.000188376	0.0117828	0.00154297	-0.00580927
0.732	0.0257753	-0.0178184	-0.000328286	0.0912152	-0.0172172	0.00136436	0.011895	0.00132347	-0.00578694
0.733	0.028978	-0.0194734	-0.000647411	0.0892846	-0.0197488	0.0022751	0.0120742	0.000983684	-0.00576012
0.734	0.0319036	-0.0210628	-0.000990658	0.0882063	-0.0215944	0.00280655	0.0121178	0.000573479	-0.00582607
0.735	0.0343969	-0.022269	-0.00139923	0.0880707	-0.0223773	0.00288513	0.0119208	0.000278678	-0.00617391
0.736	0.0364868	-0.0229801	-0.00182509	0.0888869	-0.021863	0.0024497	0.0116562	0.000204206	-0.00685449
0.737	0.0382867	-0.0234044	-0.00221199	0.0902466	-0.0200807	0.0016394	0.0116085	0.000274535	-0.00776041
0.738	0.0398581	-0.0237925	-0.00257062	0.0914107	-0.0173612	0.00081174	0.0118308	0.000313874	-0.00867975
0.739	0.0411948	-0.0242772	-0.00295014	0.091819	-0.0142474	0.000137848	0.0121253	0.000195031	-0.00934003
0.74	0.0422757	-0.02482	-0.00335403	0.0915318	-0.0112899	-0.00054739	0.0122481	-4.06725e-05	-0.00958265
0.741	0.043147	-0.0252878	-0.00371978	0.0910471	-0.00890683	-0.00134764	0.0120457	-0.000353724	-0.00948095
0.742	0.0438745	-0.0255905	-0.00394066	0.0908596	-0.00733168	-0.00217323	0.0116067	-0.000830951	-0.00917075
0.743	0.0445107	-0.0256584	-0.0039189	0.0911601	-0.00664584	-0.00300929	0.0112381	-0.00141151	-0.00864514
0.744	0.0452396	-0.025396	-0.00365415	0.0917519	-0.00688094	-0.00395263	0.0111909	-0.00187319	-0.00788998
0.745	0.0462885	-0.0247107	-0.0032368	0.0923558	-0.00800916	-0.00501475	0.0115344	-0.00210307	-0.00705326
0.746	0.0477222	-0.0236484	-0.00274151	0.0928849	-0.00985067	-0.00601342	0.0122373	-0.00202269	-0.00631428
0.747	0.0494788	-0.0224159	-0.0022263	0.0932687	-0.012086	-0.00668942	0.0131962	-0.0015712	-0.00577609
0.748	0.0515371	-0.0210825	-0.00178835	0.0933623	-0.0143665	-0.00696586	0.01417	-0.000869034	-0.00547524
0.749	0.0540337	-0.0194343	-0.00150866	0.0931366	-0.0164476	-0.00699328	0.0148951	-6.72645e-05	-0.00539877
0.75	0.0571165	-0.0172681	-0.00139332	0.0925652	-0.0182185	-0.00698439	0.0153107	0.000802943	-0.00550763
0.751	0.0607542	-0.0146478	-0.00138547	0.0914171	-0.0195951	-0.00706855	0.0154721	0.00169191	-0.00574983
0.752	0.0648374	-0.0118694	-0.00144795	0.0894522	-0.0204431	-0.00722994	0.0153614	0.00250207	-0.00612583
0.753	0.0693156	-0.0093313	-0.00160173	0.0866984	-0.0206614	-0.00737955	0.0148978	0.00317704	-0.00667187
0.754	0.0740826	-0.00741229	-0.00185319	0.0835106	-0.0202946	-0.00740534	0.0139229	0.003682	-0.00735689
0.755	0.0788696	-0.00634873	-0.00217934	0.0803465	-0.0194758	-0.00722319	0.0122707	0.00397642	-0.00808175
0.756	0.0834308	-0.00613145	-0.00252815	0.0774684	-0.01833	-0.00682061	0.0100486	0.00397535	-0.00871983
0.757	0.0874937	-0.00658746	-0.00282758	0.0749366	-0.01695	-0.00616352	0.00766752	0.00357008	-0.00919328
0.758	0.0902108	-0.00758615	-0.00306485	0.0727254	-0.0153823	-0.00529072	0.0055556	0.00277771	-0.00953835
0.759	0.0902747	-0.00900972	-0.00325451	0.0707921	-0.0136653	-0.00440508	0.00398656	0.00175544	-0.00981686
0.76	0.08708	-0.0106314	-0.00333246	0.0691619	-0.0119051	-0.00356298	0.00309139	0.000641587	-0.00996454
0.761	0.0813165	-0.0122144	-0.00320402	0.0679635	-0.0102493	-0.0026013	0.00288078	-0.000470527	-0.00982846
0.762	0.0743627	-0.0136273	-0.00284959	0.0673048	-0.00882279	-0.00145689	0.00326935	-0.00144663	-0.00938715
0.763	0.0675839	-0.0148345	-0.00230483	0.0670458	-0.00773105	-0.000298711	0.00412926	-0.00213715	-0.00875807
0.764	0.0620395	-0.0158095	-0.00159376	0.0667942	-0.00702895	0.0005405	0.00533857	-0.00243696	-0.00802885
0.765	0.0583329	-0.0164951	-0.00076067	0.0661878	-0.0066614	0.000785387	0.00679787	-0.0023248	-0.00726177
0.766	0.0565679	-0.0169099	1.32557e-05	0.0651692	-0.00644069	0.000448797	0.00841627	-0.00192868	-0.00654237
0.767	0.0565016	-0.0171719	0.000477654	0.0640014	-0.00607134	-0.000272869	0.0101012	-0.00144543	-0.0059412
0.768	0.0577069	-0.017399	0.000578267	0.0630192	-0.00525489	-0.00129509	0.0117443	-0.000965796	-0.00549011
0.769	0.0596356	-0.0176719	0.000458463	0.0623984	-0.00382313	-0.00263789	0.0132666	-0.000482227	-0.00519995
0.77	0.0616985	-0.0179618	0.000212244	0.0621392	-0.00181746	-0.00422283	0.01457	3.81562e-05	-0.0050357
0.771	0.0633576	-0.0179824	-0.000154083	0.0621252	0.000568232	-0.00594616	0.015443	0.000603209	-0.00484371
0.772	0.0641837	-0.0172848	-0.000605095	0.0620105	0.00312424	-0.00778268	0.0157553	0.00116476	-0.00446551
0.773	0.0639051	-0.0156693	-0.00105946	0.0612915	0.00556447	-0.00971284	0.0155614	0.00168462	-0.00397986
0.774	0.0624697	-0.013405	-0.00141861	0.0597059	0.00740033	-0.0116873	0.0149889	0.00209544	-0.00361688
0.775	0.0600501	-0.0109966	-0.00157921	0.0573085	0.00813756	-0.0135432	0.0142474	0.00226686	-0.0034355
0.776	0.056879	-0.00895759	-0.00133951	0.0543043	0.00756292	-0.0148898	0.0135512	0.00217627	-0.00333235
0.777	0.0531331	-0.00771392	-0.000315656	0.0510058	0.00579744	-0.015302	0.0130318	0.00193767	-0.00329966
0.778	0.0489895	-0.00738052	0.00173328	0.0477136	0.00319924	-0.0147254	0.0127954	0.00166676	-0.00343163
0.779	0.0446922	-0.0077707	0.00452089	0.0445415	0.000260613	-0.0134658	0.0128769	0.00143939	-0.00375311
0.78	0.0406279	-0.00857514	0.00738354	0.041312	-0.00252435	-0.0117742	0.0131688	0.00131382	-0.00416681
0.781	0.037224	-0.00933325	0.00972177	0.0377621	-0.00488212	-0.00975231	0.0134644	0.0013619	-0.00445493
0.782	0.0346646	-0.00959663	0.0111962	0.0340472	-0.00676978	-0.00757507	0.0135799	0.00164167	-0.00441216
0.783	0.0328454	-0.00925742	0.011642	0.0308385	-0.00808438	-0.00552155	0.0134945	0.00210565	-0.00402283
0.784	0.0314872	-0.00857995	0.0110482	0.0288868	-0.00859641	-0.00383759	0.0133997	0.00259333	-0.0034082
0.785	0.0301819	-0.00795813	0.00961443	0.0286115	-0.00819881	-0.00263587	0.0135449	0.00296786	-0.00275126
0.786	0.0285471	-0.00767866	0.0076636	0.0299756	-0.00702553	-0.00191332	0.0139642	0.00318885	-0.00222198
0.787	0.0264692	-0.00785068	0.00544551	0.0326733	-0.00541992	-0.00167957	0.0144594	0.003243	-0.00190957
0.788	0.0241174	-0.00845268	0.00310298	0.0363626	-0.00383	-0.00201588	0.0147592	0.00312231	-0.00184689
0.789	0.0217212	-0.00938282	0.000742499	0.0406128	-0.00255843	-0.0029953	0.01465	0.00286365	-0.00197489
0.79	0.0194531	-0.0104473	-0.0015443	0.0448838	-0.00163098	-0.004599	0.0141536	0.00257402	-0.00214121
0.791	0.0173665	-0.0114595	-0.00358434	0.0488493	-0.000977416	-0.00667348	0.0135	0.00231752	-0.00216342
0.792	0.0153548	-0.0124552	-0.00513488	0.0525656	-0.000638277	-0.00897749	0.0128999	0.00195255	-0.00193754
0.793	0.0133574	-0.0136098	-0.00602294	0.0562202	-0.000740923	-0.0113242	0.012472	0.00128282	-0.00152815
0.794	0.0114748	-0.0149241	-0.00621783	0.0599144	-0.00143518	-0.0136278	0.0122883	0.000360212	-0.00107398
0.795	0.00986281	-0.0161951	-0.00588812	0.0636256	-0.00285262	-0.0158062	0.0123622	-0.00052175	-0.000683888
0.796	0.0086382	-0.0171508	-0.00529416	0.0672683	-0.00496612	-0.0177118	0.0126792	-0.001059	-0.000412497
0.797	0.00777662	-0.0174456	-0.00453527	0.070744	-0.00751505	-0.0191777	0.0132762	-0.00113483	-0.000260707
0.798	0.00714383	-0.0167374	-0.00353796	0.0739199	-0.0101322	-0.0201179	0.0141658	-0.000876812	-0.000231162
0.799	0.00666333	-0.0149335	-0.00237378	0.0767439	-0.0125153	-0.0205506	0.0152206	-0.000451809	-0.000353782
0.8	0.00634777	-0.0123029	-0.00131489	0.0792811	-0.0144356	-0.0204886	0.0162597	9.65724e-05	-0.000661747
0.801	0.00619266	-0.00938678	-0.000472159	0.0815605	-0.0157228	-0.019944	0.0171575	0.000771166	-0.00117012
0.802	0.00612961	-0.00679301	0.00018626	0.0835982	-0.0164045	-0.0189933	0.0178085	0.00158144	-0.00185182
0.803	0.00612971	-0.0048988	0.000609346	0.0854543	-0.0166903	-0.0176732	0.0181046	0.00249167	-0.00261634
0.804	0.00628354	-0.00375842	0.00078079	0.0871607	-0.016713	-0.0159982	0.0180365	0.00335226	-0.00332754
0.805	0.00674053	-0.00325914	0.000751397	0.0887743	-0.0164596	-0.0140743	0.0177498	0.00393006	-0.00387049
0.806	0.00765797	-0.00326982	0.0005538	0.0903408	-0.015852	-0.011995	0.0173874	0.00403344	-0.00420148
0.807	0.00916173	-0.00372553	0.000251076	0.0916517	-0.0147999	-0.00980921	0.0169704	0.00367366	-0.00434032
0.808	0.0113194	-0.00451381	-6.51013e-05	0.0923895	-0.0133688	-0.0076487	0.0164455	0.00296811	-0.00433868
0.809	0.0141541	-0.00540831	-0.000347886	0.0924566	-0.0118146	-0.00568184	0.0157892	0.00197577	-0.00419874
0.81	0.0174883	-0.00629416	-0.000610913	0.091875	-0.0103961	-0.00402144	0.0151251	0.000804442	-0.00389184
0.811	0.0208646	-0.00721641	-0.000854308	0.0907096	-0.00921416	-0.00274317	0.0146499	-0.00033385	-0.00354681
0.812	0.0238232	-0.00818011	-0.000986529	0.0891595	-0.00819956	-0.00186912	0.0144613	-0.00123789	-0.00335981
0.813	0.0260699	-0.00909357	-0.000904331	0.087448	-0.00726855	-0.00141744	0.0145769	-0.00179646	-0.00335176
0.814	0.02747	-0.00983082	-0.000605739	0.0857406	-0.00642749	-0.00146945	0.0149846	-0.0020357	-0.00346188
0.815	0.0280853	-0.0102614	-0.00019964	0.0841718	-0.00574251	-0.00203258	0.0155996	-0.00205132	-0.00368365
0.816	0.0280917	-0.0103028	0.000136128	0.0828272	-0.00528427	-0.00299557	0.0163309	-0.00188709	-0.00403402
0.817	0.0277239	-0.0100477	0.000290175	0.0817311	-0.00508149	-0.00430795	0.017186	-0.00153899	-0.00445224
0.818	0.0272875	-0.00974991	0.00022785	0.0807849	-0.00510126	-0.00592069	0.0181066	-0.000971252	-0.00478377
0.819	0.0270237	-0.00960159	-0.000167902	0.0797497	-0.00528454	-0.00761169	0.0188431	-0.000170715	-0.00500946
0.82	0.0270398	-0.00956264	-0.00104923	0.0784493	-0.00559208	-0.00917979	0.0191968	0.00077539	-0.00529429
0.821	0.0272996	-0.00941331	-0.00238168	0.0769558	-0.00594221	-0.0106791	0.0191863	0.00173109	-0.00572994
0.822	0.0275639	-0.00892577	-0.0038669	0.0754824	-0.00617052	-0.0122716	0.0189191	0.00256735	-0.00623506
0.823	0.0275326	-0.00796557	-0.00514344	0.0741371	-0.00620068	-0.0139646	0.0184266	0.00315685	-0.00668253
0.824	0.027094	-0.00658034	-0.00599166	0.0728697	-0.00613253	-0.0155762	0.0176012	0.00338129	-0.00700211
0.825	0.0264125	-0.00501041	-0.0063143	0.0716721	-0.00613741	-0.0168502	0.0162798	0.00317741	-0.00711087
0.826	0.0257865	-0.00357413	-0.00609714	0.0707172	-0.00634084	-0.0175741	0.0144657	0.00262572	-0.00689089
0.827	0.025404	-0.00259651	-0.00539565	0.0702268	-0.00670428	-0.0176737	0.0124575	0.00189149	-0.00635469
0.828	0.025271	-0.00224823	-0.00436517	0.0702418	-0.00711445	-0.0171765	0.0107267	0.00106737	-0.00571168
0.829	0.0253453	-0.0024215	-0.00330431	0.0705565	-0.00752482	-0.0161487	0.00963778	0.000233872	-0.00516903
0.83	0.0256117	-0.00285174	-0.00241909	0.0709034	-0.00789002	-0.0146911	0.00917933	-0.000475419	-0.0047622
0.831	0.0260005	-0.00323541	-0.00163875	0.0711274	-0.00815765	-0.0128864	0.00905311	-0.000971264	-0.00445317
0.832	0.0263568	-0.00329391	-0.000881603	0.071117	-0.00830313	-0.0107824	0.00908443	-0.00123453	-0.00416771
0.833	0.0265538	-0.00286612	-0.00024046	0.0707375	-0.00827106	-0.00844546	0.00929127	-0.00125444	-0.00372944
0.834	0.0265666	-0.00196392	0.000129003	0.0698762	-0.00798281	-0.00601882	0.00956616	-0.000994837	-0.00303837
0.835	0.0263696	-0.000774498	8.70849e-05	0.0684877	-0.00747467	-0.00372448	0.00965545	-0.000476481	-0.00224645
0.836	0.0257607	0.000414416	-0.000395197	0.0667436	-0.00687753	-0.00180087	0.00949141	0.00017253	-0.00155143
0.837	0.0242919	0.00137054	-0.00117411	0.0651005	-0.00629426	-0.000447014	0.0092532	0.000821843	-0.000987713
0.838	0.0215315	0.00200902	-0.00210037	0.0640656	-0.00591308	0.000213837	0.00909228	0.00137593	-0.000565294
0.839	0.0174549	0.00229428	-0.00315288	0.0639692	-0.00595605	0.000149889	0.00903823	0.00177287	-0.000379926
0.84	0.0124609	0.00211914	-0.00432702	0.0649364	-0.00644622	-0.000563979	0.00914165	0.00201016	-0.000491822
0.841	0.00720072	0.00139671	-0.00551762	0.0669198	-0.00727992	-0.00173946	0.00953506	0.00210618	-0.000827591
0.842	0.00245191	0.000167593	-0.00655398	0.0697296	-0.00837325	-0.00314627	0.0102186	0.00211706	-0.00123638
0.843	-0.00111652	-0.00142029	-0.00731251	0.073044	-0.00967663	-0.00457593	0.0109417	0.00212451	-0.00157059
0.844	-0.00310684	-0.00316612	-0.00776945	0.0764952	-0.0111421	-0.00581482	0.0115453	0.00213905	-0.00169494
0.845	-0.00338169	-0.0049013	-0.00798284	0.0798408	-0.012714	-0.00672043	0.0121203	0.00209855	-0.00152591
0.846	-0.00210391	-0.00646037	-0.0080779	0.0829623	-0.0143602	-0.00735163	0.0127168	0.00194137	-0.00107732
0.847	0.000301232	-0.00768754	-0.00819409	0.0857248	-0.0159892	-0.00788023	0.0132044	0.00165409	-0.000478422
0.848	0.00341082	-0.00853833	-0.00841851	0.0879414	-0.0173696	-0.00845832	0.0134763	0.00121315	6.07687e-05
0.849	0.00684756	-0.00896102	-0.00881466	0.0895385	-0.0182244	-0.00913565	0.0136242	0.00058527	0.000464679
0.85	0.00998783	-0.00887261	-0.00948365	0.0907447	-0.0183946	-0.00979516	0.0137877	-0.000129977	0.000775812
0.851	0.0121236	-0.00835157	-0.010523	0.0918507	-0.017943	-0.0102731	0.0139796	-0.000770016	0.000911307
0.852	0.0130084	-0.00762821	-0.0118922	0.0928549	-0.0170896	-0.0104624	0.0141544	-0.00128057	0.000803304
0.853	0.0129138	-0.00693925	-0.0133013	0.0935732	-0.0160697	-0.0102817	0.0142822	-0.00165314	0.00052856
0.854	0.0123292	-0.00641092	-0.0143846	0.0937932	-0.0150509	-0.00974158	0.0143211	-0.00188947	0.000116145
0.855	0.0116645	-0.00605666	-0.0149589	0.0932348	-0.0140904	-0.00899741	0.0142819	-0.00202184	-0.000456811
0.856	0.0110903	-0.00583146	-0.0149783	0.0916639	-0.0131631	-0.00823932	0.0142853	-0.00208206	-0.00111586
0.857	0.0106099	-0.00562535	-0.0145113	0.0891252	-0.0122539	-0.00762116	0.014386	-0.00215077	-0.00171698
0.858	0.0101053	-0.00531925	-0.0137591	0.0859238	-0.011418	-0.00720919	0.0144756	-0.00230136	-0.00210724
0.859	0.0093885	-0.00483716	-0.0128591	0.0823713	-0.0106757	-0.00695395	0.0144482	-0.00252513	-0.00213975
0.86	0.00839718	-0.00422153	-0.0117883	0.0786594	-0.00990203	-0.00682132	0.0143189	-0.00279502	-0.00176902
0.861	0.00722101	-0.00366752	-0.0104792	0.0749498	-0.00898627	-0.00679815	0.0141792	-0.00306567	-0.0011446
0.862	0.00587125	-0.00332782	-0.0089692	0.0714807	-0.00799851	-0.00680782	0.0141043	-0.00321429	-0.000542391
0.863	0.00425723	-0.00322575	-0.0074549	0.0685377	-0.00708985	-0.00680495	0.0140832	-0.00312947	-0.000146025
0.864	0.00237049	-0.00334772	-0.00612084	0.0664619	-0.00635849	-0.00679665	0.0140108	-0.00287765	9.08899e-05
0.865	0.000224294	-0.00357596	-0.0050054	0.0656393	-0.00583128	-0.00673966	0.0137844	-0.00258902	0.000264418
0.866	-0.00221512	-0.00360665	-0.00410324	0.0662363	-0.00544813	-0.00655237	0.0133975	-0.00227802	0.000304661
0.867	-0.00486962	-0.00312683	-0.00348491	0.0680439	-0.00503731	-0.00618004	0.0128516	-0.00193673	0.000147153
0.868	-0.00755541	-0.0020573	-0.00331541	0.070694	-0.00446162	-0.00558281	0.0121333	-0.0015803	-0.000160407
0.869	-0.010075	-0.000611593	-0.00373303	0.0738712	-0.0038018	-0.00472826	0.0114417	-0.00114589	-0.000631742
0.87	-0.0121875	0.000883228	-0.00467823	0.0772445	-0.00326033	-0.00370162	0.011076	-0.000532013	-0.00132238
0.871	-0.0137265	0.00224878	-0.00593398	0.0804593	-0.00301174	-0.00272079	0.0109718	0.00027689	-0.00218305
0.872	-0.0147188	0.00339807	-0.00723263	0.0832406	-0.00315207	-0.00191827	0.0106888	0.00115914	-0.00305607
0.873	-0.0152663	0.0041507	-0.00823338	0.0852918	-0.00365829	-0.00121883	0.00986126	0.00193843	-0.00382086
0.874	-0.0154336	0.00434333	-0.00863527	0.0863253	-0.00443864	-0.000477679	0.00849401	0.00257582	-0.00439902
0.875	-0.0152949	0.00392683	-0.00839388	0.08629	-0.00535969	0.000340939	0.00692677	0.0031288	-0.00464616
0.876	-0.0149233	0.00298898	-0.00762216	0.085337	-0.00629169	0.00120079	0.0056325	0.00351574	-0.0044911
0.877	-0.0142794	0.00180881	-0.00634039	0.0836702	-0.00724588	0.00207925	0.00503697	0.00362171	-0.00405347
0.878	-0.0133718	0.000687114	-0.00456921	0.081522	-0.00828806	0.00294879	0.00541926	0.00355018	-0.00347469
0.879	-0.0124203	-0.000216394	-0.00245986	0.0791565	-0.00933967	0.00385704	0.00675028	0.00348888	-0.00277015
0.88	-0.0116142	-0.000799356	-0.000227927	0.076839	-0.0102151	0.00489905	0.00866012	0.00352297	-0.00193702
0.881	-0.0109685	-0.00097054	0.0018107	0.0748096	-0.0107858	0.0059983	0.0107373	0.00362871	-0.0010732
0.882	-0.0105251	-0.000747711	0.00326366	0.073256	-0.0110224	0.0069184	0.012744	0.00367801	-0.000314046
0.883	-0.0105069	-0.000320439	0.00379022	0.0722574	-0.0108527	0.00745886	0.0145313	0.00362022	0.000235416
0.884	-0.0111237	5.84873e-05	0.00319621	0.0718447	-0.0101382	0.00748519	0.0160044	0.00358081	0.000538513
0.885	-0.0122503	0.000230144	0.00155054	0.0720574	-0.008888	0.00692068	0.017195	0.00359542	0.000649912
0.886	-0.0135149	0.000215159	-0.0008527	0.0728678	-0.00734826	0.00576555	0.0181635	0.00353879	0.000618266
0.887	-0.0146534	0.000179239	-0.00365487	0.0742026	-0.00589092	0.00404878	0.0189386	0.00335518	0.000378711
0.888	-0.0155674	0.000221592	-0.00649103	0.0759763	-0.00488792	0.00190499	0.0196545	0.00305108	-0.000184142
0.889	-0.0161767	0.000287475	-0.00895635	0.0780174	-0.00457672	-0.000354013	0.0204992	0.00259416	-0.0011046
0.89	-0.0164104	0.000306139	-0.0105883	0.0801477	-0.00498655	-0.00236518	0.0215066	0.00202425	-0.00229444
0.891	-0.0162499	0.000260641	-0.0110454	0.0823104	-0.00601148	-0.00384828	0.0225496	0.00151654	-0.003521
0.892	-0.0157533	0.000129517	-0.0102605	0.0844616	-0.00741098	-0.00468732	0.0234688	0.00124883	-0.00444248
0.893	-0.0150786	-0.00021699	-0.00838344	0.0865073	-0.00873778	-0.00494331	0.0241895	0.0012453	-0.00485615
0.894	-0.0144343	-0.000962234	-0.00576233	0.0884051	-0.00952252	-0.00475831	0.0247044	0.00139466	-0.00486439
0.895	-0.0139828	-0.00205521	-0.00283198	0.0901045	-0.00958139	-0.00430486	0.0249439	0.00159148	-0.00464628
0.896	-0.0137508	-0.00321195	7.76691e-05	0.0914109	-0.00911985	-0.00372145	0.0248362	0.00181669	-0.00426254
0.897	-0.0136396	-0.0042792	0.00273749	0.0920664	-0.00853113	-0.00296146	0.0244846	0.00213971	-0.00378036
0.898	-0.0135386	-0.00523654	0.00489788	0.0919174	-0.00804786	-0.00188273	0.0241109	0.00269496	-0.00334489
0.899	-0.0133717	-0.00594762	0.00629557	0.0910277	-0.00769852	-0.000488665	0.0238075	0.00362793	-0.00304822
0.9	-0.0130518	-0.00619779	0.0068572	0.0897433	-0.00742921	0.00107394	0.0234922	0.00492872	-0.00286844
0.901	-0.0125091	-0.00585905	0.00674309	0.0884977	-0.00706274	0.00263109	0.0231003	0.00630185	-0.00273801
0.902	-0.0118007	-0.0049616	0.00606952	0.0874417	-0.00638611	0.00397364	0.0226762	0.00736763	-0.00265429
0.903	-0.0111212	-0.00360653	0.0047383	0.0864072	-0.0053324	0.00488102	0.0222575	0.00802564	-0.00285149
0.904	-0.0106637	-0.00190384	0.00263212	0.0852002	-0.0039745	0.00528088	0.0218141	0.00845419	-0.00364443
0.905	-0.0104931	-7.59131e-05	-0.000161857	0.0837245	-0.00247168	0.00530831	0.0213179	0.00874695	-0.00502066
0.906	-0.0105759	0.00153352	-0.00336592	0.0819438	-0.00102214	0.00518446	0.0207429	0.00883978	-0.00667476
0.907	-0.0109063	0.00257862	-0.00661042	0.08001	0.00024594	0.00505025	0.0200512	0.00875287	-0.0082244
0.908	-0.0115804	0.00291615	-0.00948879	0.0782355	0.0013111	0.00490025	0.0192435	0.00857121	-0.0092634
0.909	-0.0127278	0.00271989	-0.0115864	0.0767987	0.00217935	0.0047261	0.018443	0.00833484	-0.00949852
0.91	-0.0143491	0.00223266	-0.0126248	0.075583	0.00275322	0.00465988	0.0179248	0.00808901	-0.00886559
0.911	-0.0161991	0.00155294	-0.0126815	0.0742035	0.00287062	0.00488807	0.0179054	0.00788692	-0.00750644
0.912	-0.0178523	0.00070101	-0.0121727	0.0722253	0.00257057	0.00546123	0.0183149	0.00780735	-0.0056924
0.913	-0.0189521	-0.000306318	-0.0115331	0.0695396	0.00211798	0.00626524	0.0189086	0.00794032	-0.00371553
0.914	-0.019395	-0.00141948	-0.0109454	0.0665382	0.00171438	0.00715639	0.0194844	0.00834261	-0.00183592
0.915	-0.0193111	-0.0025831	-0.0103916	0.0637407	0.00141809	0.00800365	0.0199128	0.00905049	-0.000333208
0.916	-0.0189424	-0.00378932	-0.00989981	0.0613431	0.00132267	0.00867929	0.020109	0.00997027	0.000530571
0.917	-0.0184423	-0.00495964	-0.00965433	0.0592297	0.00155643	0.00912648	0.0199696	0.0108841	0.000711619
0.918	-0.0177336	-0.00590815	-0.00989916	0.057154	0.00210462	0.00942035	0.0193443	0.0116482	0.000392617
0.919	-0.01672	-0.00652538	-0.0109804	0.0549096	0.00283045	0.0096701	0.0181627	0.0121849	-0.000199054
0.92	-0.015533	-0.00678711	-0.0132839	0.0525023	0.00362406	0.00984907	0.0165415	0.0123825	-0.000825477
0.921	-0.0143858	-0.00668541	-0.0167749	0.0501309	0.0043773	0.00987093	0.0147801	0.0121378	-0.00128178
0.922	-0.0133724	-0.00628952	-0.0208873	0.0479514	0.00498	0.00973996	0.0131933	0.0114499	-0.00149346
0.923	-0.0124819	-0.00574423	-0.0248935	0.0458759	0.0053577	0.00951898	0.0119325	0.0104829	-0.00150432
0.924	-0.0116829	-0.00519256	-0.0280876	0.0437659	0.0054259	0.00924393	0.0110708	0.00947266	-0.00143095
0.925	-0.0109319	-0.00475751	-0.029897	0.0418121	0.00516499	0.00889219	0.0107056	0.00854062	-0.00133367
0.926	-0.0102275	-0.00456903	-0.0300472	0.0403947	0.00464451	0.00842224	0.0108526	0.00772193	-0.00114298
0.927	-0.00973062	-0.00473386	-0.0286197	0.039673	0.00391527	0.00775388	0.0114105	0.00709436	-0.000816749
0.928	-0.00963578	-0.00530903	-0.0260329	0.039614	0.00299397	0.00683499	0.0122609	0.00675085	-0.000428565
0.929	-0.0100352	-0.0062821	-0.0227625	0.040105	0.00188876	0.005848	0.0132855	0.00678436	-6.81498e-05
0.93	-0.0109611	-0.00747794	-0.0190784	0.0408045	0.000650696	0.00509925	0.014396	0.00725553	0.000208448
0.931	-0.0123198	-0.00852408	-0.0151617	0.0412689	-0.000531998	0.00475176	0.0155932	0.00809347	0.000365216
0.932	-0.0138681	-0.00897827	-0.0112311	0.0413606	-0.00142475	0.00476131	0.0168084	0.00913991	0.00037705
0.933	-0.0153783	-0.00858216	-0.00747019	0.0412832	-0.00195805	0.00495634	0.0177863	0.0101549	0.000164932
0.934	-0.0167696	-0.00743655	-0.00399656	0.0413103	-0.00216423	0.00520866	0.0183228	0.0108105	-0.000388838
0.935	-0.0180047	-0.00584449	-0.000914622	0.0416536	-0.00200752	0.00544387	0.0184449	0.0109065	-0.00129538
0.936	-0.0189383	-0.00409757	0.00171986	0.0425748	-0.00147342	0.00553062	0.0182938	0.0104279	-0.00243296
0.937	-0.0194122	-0.00248983	0.00386908	0.0444645	-0.00066178	0.0053432	0.0179667	0.00939264	-0.00369037
0.938	-0.019397	-0.00129224	0.00537711	0.0474449	0.000295888	0.00486707	0.0174984	0.0078649	-0.00498529
0.939	-0.0190429	-0.000665777	0.00608692	0.0510324	0.00126557	0.00419617	0.0169634	0.0060619	-0.0061576
0.94	-0.0186685	-0.000685305	0.00610578	0.0544247	0.00207432	0.00349242	0.0163966	0.00432212	-0.00703392
0.941	-0.0185358	-0.00135114	0.00576809	0.0569096	0.0025223	0.00294397	0.0156717	0.00292023	-0.00752682
0.942	-0.0186847	-0.00251657	0.00538888	0.0581215	0.00243435	0.00266484	0.014708	0.00190442	-0.00765217
0.943	-0.0190727	-0.00391688	0.00509847	0.0579943	0.001762	0.00262312	0.013661	0.00112784	-0.00754999
0.944	-0.0196619	-0.00531756	0.00482435	0.0564882	0.000677225	0.0027154	0.0128002	0.000464892	-0.00735734
0.945	-0.0203139	-0.00656867	0.00442504	0.0536219	-0.000555434	0.00289969	0.0123195	-3.67481e-05	-0.00700506
0.946	-0.0208279	-0.00760376	0.00380708	0.0497103	-0.00181686	0.0032219	0.0121488	-0.000225212	-0.00633096
0.947	-0.021078	-0.00843689	0.00291654	0.0453153	-0.00309915	0.00370624	0.0118403	8.92015e-06	-0.00537051
0.948	-0.0210086	-0.00906499	0.00172674	0.0409138	-0.00433234	0.00433618	0.0109081	0.000639322	-0.00432531
0.949	-0.0206716	-0.00939611	0.000320943	0.0367075	-0.00540185	0.0050798	0.00930268	0.00155072	-0.00338257
0.95	-0.0202641	-0.00927338	-0.0011173	0.0327715	-0.00619596	0.00578046	0.00740641	0.00262648	-0.00268319
0.951	-0.0199948	-0.0085703	-0.00244154	0.0292302	-0.00662597	0.00619667	0.00573844	0.00375004	-0.00232616
0.952	-0.0198996	-0.00735837	-0.00350681	0.0263152	-0.00677237	0.00621757	0.00468629	0.00481583	-0.00235213
0.953	-0.0197917	-0.00582404	-0.0041576	0.024336	-0.00682732	0.00592927	0.00439383	0.00571382	-0.00275264
0.954	-0.0194395	-0.00405322	-0.00439253	0.023414	-0.00676377	0.00548872	0.00484571	0.00636142	-0.0034819
0.955	-0.0187237	-0.00211289	-0.00428734	0.0232932	-0.00631529	0.00495109	0.00595246	0.0067519	-0.00440262
0.956	-0.0176465	-0.000132341	-0.00379769	0.0235477	-0.00532114	0.00424575	0.00754887	0.0068851	-0.00529121
0.957	-0.0163567	0.00176458	-0.00285241	0.0238869	-0.0038921	0.00332239	0.00944031	0.00676671	-0.00594229
0.958	-0.0151913	0.00343496	-0.00153756	0.0243215	-0.00231179	0.00230474	0.0114765	0.00645117	-0.00615273
0.959	-0.0145689	0.00466166	-6.04721e-05	0.0250707	-0.000924757	0.00146475	0.0135146	0.00604195	-0.00568068
0.96	-0.0147124	0.00525343	0.0014715	0.0262614	1.68069e-05	0.0010276	0.0153939	0.00565684	-0.00442653
0.961	-0.0155933	0.00519146	0.00313922	0.0278887	0.000501848	0.00108367	0.0170254	0.00537527	-0.00260102
0.962	-0.0170692	0.00461067	0.00502847	0.0299939	0.000637543	0.00163545	0.018372	0.00526899	-0.000620245
0.963	-0.0188207	0.00373272	0.00707428	0.0325594	0.000417791	0.00265633	0.0193806	0.00542517	0.00115003
0.964	-0.0203712	0.00277656	0.00907016	0.035388	-0.000163032	0.00408217	0.0200599	0.00585487	0.00254683
0.965	-0.0213918	0.00182126	0.010767	0.0382293	-0.000931322	0.00568412	0.0205316	0.00643963	0.00354937
0.966	-0.021936	0.000864465	0.011989	0.0408272	-0.00168886	0.00710232	0.0209331	0.00706347	0.00415437
0.967	-0.0223648	-1.3625e-05	0.0126597	0.0429293	-0.0023436	0.0081298	0.0212415	0.0076856	0.00434792
0.968	-0.0230787	-0.000627664	0.0128194	0.0444454	-0.0028157	0.00878864	0.0213172	0.00825162	0.00419947
0.969	-0.0242286	-0.000760089	0.0126213	0.0455631	-0.00299144	0.0091398	0.0211672	0.0087086	0.00389887
0.97	-0.025584	-0.000305297	0.0121736	0.046532	-0.00283142	0.00918627	0.0209473	0.00905092	0.00369278
0.971	-0.0268155	0.000585052	0.0114157	0.0473718	-0.00244486	0.00890317	0.0207363	0.00927204	0.00363062
0.972	-0.0279095	0.00158845	0.0102676	0.0479911	-0.0020106	0.00832086	0.0205173	0.00932061	0.00279401
0.973	-0.0290957	0.00248373	0.00888029	0.0484858	-0.00164401	0.0075832	0.0203353	0.00913607	-0.000592338
0.974	-0.0304303	0.00325778	0.00766085	0.0491857	-0.00137998	0.00688597	0.0202542	0.00874772	-0.00720587
0.975	-0.031793	0.00399433	0.00700493	0.0503847	-0.00124415	0.00637361	0.0202185	0.00823719	-0.015711
0.976	-0.0332058	0.00474069	0.00699957	0.0521292	-0.00125081	0.0060804	0.020142	0.00762452	-0.0240183
0.977	-0.0347851	0.00546276	0.00744473	0.0543266	-0.00141034	0.00592429	0.0200303	0.00691141	-0.0304069
0.978	-0.0364821	0.00612527	0.00807064	0.0568521	-0.00174828	0.00580616	0.01996	0.00610671	-0.0338687
0.979	-0.0380457	0.00682764	0.00867641	0.0595073	-0.00223155	0.00574103	0.0200051	0.00520919	-0.0341076
0.98	-0.0392134	0.00777095	0.00915122	0.0619746	-0.00276007	0.00586419	0.0201919	0.00428106	-0.0313324
0.981	-0.0399159	0.00898199	0.00944274	0.0638869	-0.00324378	0.00627475	0.0205221	0.00343645	-0.0261135
0.982	-0.0401999	0.010193	0.00959645	0.0649908	-0.00361481	0.00691075	0.0209585	0.00277025	-0.0192972
0.983	-0.0400624	0.0110674	0.00970695	0.065294	-0.00379564	0.00764977	0.0213646	0.00237605	-0.0118513
0.984	-0.0394954	0.0114325	0.00979093	0.0649751	-0.00374432	0.00835134	0.021607	0.00231672	-0.00466246
0.985	-0.0385509	0.0113049	0.00977026	0.0641247	-0.00348947	0.00882243	0.0216461	0.00257827	0.00161368
0.986	-0.0373441	0.0108068	0.00954781	0.0627528	-0.0030132	0.00893989	0.0214354	0.00306332	0.00656891
0.987	-0.0361327	0.0101167	0.00916705	0.0609007	-0.00229149	0.00873109	0.0209594	0.00354575	0.0100381
0.988	-0.0353259	0.00942297	0.00878461	0.0586277	-0.00149062	0.0083333	0.0203709	0.00380583	0.012105
0.989	-0.0352536	0.00879811	0.00847082	0.0560157	-0.000898133	0.00791331	0.0199464	0.00386134	0.012981
0.99	-0.0359642	0.00810873	0.00819093	0.0531962	-0.00071544	0.00759106	0.0199239	0.0038551	0.0129116
0.991	-0.037262	0.00718667	0.00788778	0.0503914	-0.000983935	0.00740251	0.0202953	0.00378665	0.0122005
0.992	-0.0388596	0.00612073	0.0075448	0.0479009	-0.0016106	0.00728668	0.0207729	0.00355865	0.0111569
0.993	-0.0404529	0.00520904	0.0072625	0.0459844	-0.00243884	0.0071634	0.0211046	0.00315716	0.0100178
0.994	-0.0416997	0.00463272	0.00721088	0.0447581	-0.00336478	0.0070271	0.0213194	0.00268872	0.00899664
0.995	-0.0422806	0.00438246	0.00738401	0.0441343	-0.004365	0.00692404	0.0216025	0.0023554	0.00827388
0.996	-0.0420319	0.00442622	0.00755247	0.0438705	-0.00540489	0.00690259	0.022029	0.00235394	0.00789251
0.997	-0.0410356	0.00475062	0.00759088	0.0437841	-0.00640336	0.00695583	0.0224844	0.00271478	0.0077976
0.998	-0.0395518	0.00532903	0.0075821	0.0438484	-0.00726646	0.00699124	0.0228304	0.00335999	0.00792722
0.999	-0.0378815	0.00612918	0.00754356	0.0442081	-0.00789076	0.00694271	0.0230296	0.00428712	0.00819668
1	-0.0363264	0.00733283	0.00735282	0.045221	-0.00818354	0.0069315	0.0230442	0.00543537	0.00855429
1.001	-0.0350601	0.00951929	0.00696229	0.0472129	-0.00817768	0.00723151	0.0227863	0.00656458	0.00898559
1.002	-0.0340399	0.0130684	0.00648971	0.0501757	-0.00799754	0.00803187	0.022274	0.00737566	0.00937066
1.003	-0.0332373	0.0175581	0.00605296	0.0538129	-0.00765939	0.00931398	0.0216589	0.00756373	0.00955438
1.004	-0.032822	0.0220494	0.00569422	0.0577105	-0.0070866	0.0109068	0.0210981	0.00698708	0.00952879
1.005	-0.0329488	0.0256797	0.00547805	0.0614636	-0.00623528	0.0125815	0.0207175	0.00584186	0.00941815
1.006	-0.0335577	0.028011	0.00542828	0.0648113	-0.00502124	0.0141368	0.0206021	0.00452391	0.0092989
1.007	-0.0345376	0.0288979	0.00546985	0.0676325	-0.00328101	0.0153794	0.0208192	0.0033937	0.00907905
1.008	-0.0357973	0.0282713	0.0055717	0.0698352	-0.00100567	0.0161494	0.0213734	0.00264762	0.00869137
1.009	-0.0371363	0.0262646	0.00573268	0.0713471	0.00158124	0.0164556	0.0220759	0.00234089	0.00829047
1.01	-0.038399	0.0233405	0.00594783	0.0721917	0.00427361	0.0164321	0.0226681	0.00254681	0.00804724
1.011	-0.0396091	0.0201061	0.00630562	0.0724482	0.00696633	0.0162727	0.0229803	0.0033634	0.00788928
1.012	-0.0407507	0.0169721	0.00689945	0.0721691	0.00952624	0.0163093	0.0229822	0.00469357	0.0076595
1.013	-0.0416654	0.0140533	0.00778141	0.0714574	0.0117967	0.0169126	0.0228436	0.00623422	0.00742221
1.014	-0.0421969	0.0113796	0.00896794	0.0705204	0.0136698	0.0182119	0.0228024	0.0076566	0.00736217
1.015	-0.04232	0.00909542	0.0103217	0.0696347	0.01505	0.0200004	0.0229436	0.00869491	0.00750717
1.016	-0.0421545	0.00741468	0.0116159	0.0691275	0.0158879	0.0218578	0.023133	0.00920958	0.00780407
1.017	-0.0419216	0.00638299	0.0127192	0.0692737	0.0163069	0.0232791	0.0231667	0.00921454	0.0083154
1.018	-0.041827	0.00581706	0.0135948	0.0702649	0.0165188	0.0239255	0.0229229	0.00887808	0.00916657
1.019	-0.0419124	0.00552909	0.0141931	0.0722912	0.0166671	0.0238168	0.0223395	0.00844327	0.0103662
1.02	-0.0421327	0.00541421	0.0144595	0.0753819	0.0168071	0.0231678	0.0213947	0.0080074	0.0117332
1.021	-0.0425075	0.00534057	0.0143702	0.0791749	0.0168112	0.0222247	0.0200477	0.0074774	0.0130175
1.022	-0.0431097	0.00518247	0.0138999	0.0830364	0.0164414	0.0211026	0.0181556	0.00673642	0.0140745
1.023	-0.0439963	0.00486962	0.0130197	0.0863755	0.01563	0.0196102	0.0155788	0.00574209	0.0148927
1.024	-0.0450983	0.00431151	0.0117532	0.0887266	0.0145006	0.0175417	0.0116454	0.00457703	0.0154976
1.025	-0.0462171	0.00338413	0.0102679	0.0897399	0.0132471	0.0150538	0.00452948	0.00342386	0.0158732
1.026	-0.0471636	0.00205586	0.00885757	0.0894082	0.0120478	0.0125101	-0.00700327	0.00237904	0.0159703
1.027	-0.0478642	0.000512867	0.00775616	0.0880385	0.0109483	0.0102295	-0.0215948	0.00141858	0.0158314
1.028	-0.0482857	-0.000922326	0.00703526	0.085962	0.00985158	0.00851755	-0.0361807	0.000544311	0.0155732
1.029	-0.0483015	-0.00196336	0.00669099	0.0835466	0.00872765	0.00756606	-0.0478439	-0.000223061	0.0152096
1.03	-0.0478728	-0.00242411	0.00670803	0.0811191	0.00775263	0.00734508	-0.0547647	-0.000824833	0.0146488
1.031	-0.0471671	-0.00218445	0.00698852	0.0786787	0.00721477	0.00778959	-0.056269	-0.0010683	0.0138042
1.032	-0.0463343	-0.0011586	0.00740883	0.0759916	0.00733545	0.00887946	-0.0524756	-0.000723739	0.01268
1.033	-0.0454429	0.000643163	0.00800012	0.073007	0.00817412	0.0105397	-0.0441535	0.000306593	0.011368
1.034	-0.0445393	0.00306532	0.008853	0.0700062	0.00967202	0.0125671	-0.0325046	0.00193253	0.0100209
1.035	-0.0436006	0.00583364	0.00993847	0.0673623	0.0116891	0.0147126	-0.0187315	0.00403981	0.00880014
1.036	-0.04256	0.00869876	0.0111366	0.0653201	0.0141189	0.0168262	-0.00385096	0.00666434	0.00778817
1.037	-0.0413681	0.0115482	0.0122889	0.0640057	0.0169924	0.0187684	0.011194	0.00974635	0.00705369
1.038	-0.0399764	0.0142434	0.0132868	0.0634407	0.020373	0.0203694	0.0254568	0.0129511	0.00667565
1.039	-0.0383851	0.016536	0.0142032	0.0634452	0.0242068	0.0215475	0.0381569	0.0159431	0.00670477
1.04	-0.0366878	0.0182729	0.0152068	0.0637545	0.0282044	0.0222819	0.048917	0.0185143	0.00714203
1.041	-0.0349988	0.0195179	0.0163562	0.0642975	0.0318978	0.0226298	0.0577515	0.0205326	0.00775295
1.042	-0.0334023	0.0203757	0.0176214	0.0651179	0.0348491	0.0227728	0.0648924	0.0220441	0.00802074
1.043	-0.0318531	0.0208346	0.0189968	0.0662821	0.0368165	0.0228284	0.070648	0.0232801	0.00736341
1.044	-0.0300911	0.0208725	0.0204846	0.0680993	0.0378395	0.0227585	0.0752649	0.0244386	0.00525311
1.045	-0.0278921	0.0205444	0.0221099	0.0709804	0.0381424	0.0225358	0.0788657	0.0256455	0.00133622
1.046	-0.0253206	0.0199884	0.0239408	0.0749634	0.037979	0.0222119	0.0815429	0.0271548	-0.00437398
1.047	-0.0224987	0.0194471	0.025995	0.0796429	0.0375434	0.0218098	0.0834046	0.0292806	-0.0115739
1.048	-0.0192877	0.0192188	0.0281562	0.0844755	0.0369451	0.0212838	0.0845605	0.0320725	-0.0198892
1.049	-0.0153937	0.0194697	0.0301871	0.0889838	0.0362341	0.0205798	0.0851997	0.0352398	-0.0289438
1.05	-0.0106728	0.0200885	0.0319063	0.0928199	0.0353649	0.0196756	0.0855075	0.0384226	-0.0383351
1.051	-0.00522501	0.0209153	0.0333042	0.0958187	0.0342887	0.0185893	0.0854759	0.0414607	-0.0475857
1.052	0.000683197	0.0219285	0.0344715	0.098017	0.0330469	0.0173616	0.0850031	0.0443323	-0.0560874
1.053	0.00677377	0.0230531	0.035575	0.0996204	0.0316573	0.0160654	0.0840833	0.046904	-0.063136
1.054	0.0129176	0.0240643	0.0367271	0.100911	0.0301041	0.0148194	0.0827174	0.0489493	-0.0682417
1.055	0.0190514	0.024753	0.0378065	0.102135	0.028363	0.0137273	0.0807467	0.0503857	-0.071398
1.056	0.024923	0.0250133	0.038586	0.103446	0.0263649	0.0128564	0.0779332	0.0512736	-0.0728983
1.057	0.0300836	0.0246965	0.0389188	0.104842	0.0240803	0.0122696	0.0741963	0.0516358	-0.0731313
1.058	0.0340746	0.0236242	0.0387906	0.106131	0.0215775	0.0120164	0.0697633	0.0514913	-0.0725543
1.059	0.0364993	0.0219535	0.0382957	0.107069	0.0189621	0.0121283	0.0650293	0.0509701	-0.0714702
1.06	0.037228	0.0203897	0.0375082	0.107508	0.0163104	0.0125813	0.0602994	0.0502557	-0.0698607
1.061	0.0365912	0.0196214	0.0364256	0.107416	0.0136374	0.0132657	0.0558156	0.049529	-0.067584
1.062	0.0351339	0.0196194	0.0350156	0.106915	0.0109491	0.0140316	0.0518328	0.0489825	-0.0645893
1.063	0.0333419	0.0198991	0.0332563	0.106203	0.00841316	0.0147779	0.0485225	0.0487547	-0.0609346
1.064	0.0316084	0.0201251	0.0312205	0.105417	0.00647798	0.0154399	0.0459325	0.0488598	-0.0567173
1.065	0.0301417	0.0202023	0.0290055	0.104616	0.00575967	0.015909	0.0440143	0.0492023	-0.051971
1.066	0.0288919	0.0201129	0.0265797	0.103757	0.00669712	0.0161278	0.0426886	0.0495551	-0.0466252
1.067	0.0277177	0.0197871	0.0239556	0.102759	0.00923091	0.0161646	0.0418383	0.0496621	-0.0405962
1.068	0.0265131	0.019087	0.0213494	0.101695	0.0127971	0.0161827	0.0412606	0.0494769	-0.0338793
1.069	0.0251612	0.0179394	0.0190559	0.100733	0.0165561	0.0163856	0.0407653	0.0491144	-0.0265839
1.07	0.0235699	0.0164254	0.0173426	0.0999101	0.019664	0.0169258	0.0401962	0.0486534	-0.01903
1.071	0.0217631	0.0146839	0.0163061	0.0991589	0.0215765	0.0179299	0.0394563	0.0480746	-0.0117827
1.072	0.019876	0.0127673	0.0157348	0.0985082	0.0222242	0.0194385	0.0386228	0.0473271	-0.00533918
1.073	0.0181534	0.0106463	0.0152636	0.0981847	0.0218329	0.021311	0.0377872	0.046435	0.000208825
1.074	0.0169463	0.008367	0.0147032	0.0984684	0.020642	0.0234468	0.0368703	0.0454511	0.00503364
1.075	0.0164591	0.00616856	0.0141696	0.099394	0.0189515	0.0258918	0.0357696	0.0443872	0.00930114
1.076	0.0165376	0.00441763	0.0138628	0.100798	0.0171714	0.0285906	0.0345069	0.0432073	0.0131828
1.077	0.0169366	0.00340036	0.0138582	0.102518	0.0155327	0.0313247	0.0332667	0.0418689	0.0168539
1.078	0.0174919	0.00318629	0.0141517	0.104306	0.0140921	0.0339132	0.0323907	0.0404646	0.0203285
1.079	0.0179823	0.00366482	0.0147125	0.105773	0.0130603	0.0362823	0.0320874	0.0392142	0.0234569
1.08	0.0182542	0.0046062	0.01549	0.106588	0.0127284	0.038434	0.0322202	0.0382946	0.0261593
1.081	0.0182383	0.00574487	0.0163804	0.106563	0.0131833	0.040367	0.0325292	0.0377177	0.0284544
1.082	0.017726	0.00686809	0.017219	0.105645	0.0142697	0.0419288	0.0328487	0.0373757	0.0303024
1.083	0.0164823	0.0078461	0.0179055	0.103927	0.0157538	0.0428859	0.0331151	0.0372355	0.031655
1.084	0.0144578	0.0086732	0.0184502	0.101588	0.0175196	0.0431733	0.0333065	0.0373258	0.0325293
1.085	0.0118375	0.00940291	0.0188984	0.098832	0.0195885	0.0429769	0.0333765	0.0375509	0.0329345
1.086	0.00903079	0.0100562	0.0192805	0.0959352	0.0219793	0.0425573	0.0332299	0.0377409	0.0328663
1.087	0.0064822	0.0106579	0.0196052	0.0931679	0.0246881	0.0420785	0.0328231	0.0378385	0.0324287
1.088	0.00439725	0.0112585	0.0198849	0.0906172	0.0277363	0.0416874	0.0322585	0.0378607	0.0318401
1.089	0.00273818	0.0119043	0.0201626	0.0882375	0.0309967	0.0415479	0.0316915	0.0377042	0.031321
1.09	0.00139952	0.0125177	0.0205215	0.0860072	0.0340169	0.0416649	0.0311479	0.0371941	0.0310541
1.091	0.000272382	0.012896	0.0210826	0.0838651	0.0362859	0.0418192	0.0305515	0.0363115	0.0311274
1.092	-0.000836477	0.0129619	0.0218699	0.0816466	0.0375951	0.0416381	0.0299562	0.0351873	0.0314771
1.093	-0.00225031	0.0128403	0.0226853	0.0792557	0.037966	0.0406589	0.0295523	0.0339571	0.0319762
1.094	-0.00422598	0.0126478	0.0233227	0.0767015	0.0375315	0.0384887	0.0294392	0.0327875	0.0325475
1.095	-0.00682293	0.0123572	0.0237301	0.073926	0.0366138	0.0350334	0.029541	0.0318933	0.0331637
1.096	-0.0100175	0.0119443	0.0238493	0.0707971	0.0356443	0.0304335	0.0296383	0.0314277	0.0338159
1.097	-0.0136829	0.011537	0.0236119	0.0671725	0.0348526	0.0247625	0.0293801	0.0313698	0.0345127
1.098	-0.0175259	0.0112819	0.0230719	0.0627913	0.0341003	0.0180179	0.0284009	0.0314187	0.0351847
1.099	-0.0212848	0.0110765	0.022374	0.0571535	0.0330971	0.0102963	0.0264563	0.0310849	0.0355981
1.1	-0.0249142	0.0104875	0.0216586	0.0496064	0.0315868	0.00180854	0.0234032	0.0299825	0.0354619
1.101	-0.0285007	0.00908782	0.020938	0.0396737	0.0293297	-0.00715131	0.0191752	0.0279469	0.0345434
1.102	-0.0321383	0.00680278	0.0200334	0.0273881	0.0261114	-0.0163105	0.0137755	0.0248752	0.0326719
1.103	-0.0359042	0.00380942	0.0186846	0.0132436	0.0217448	-0.0255246	0.00727487	0.0205727	0.0297439
1.104	-0.0398898	0.000285557	0.0166821	-0.00203316	0.0161208	-0.0346916	-0.000207853	0.0148766	0.0257596
1.105	-0.0442874	-0.00363915	0.0138827	-0.017567	0.00930762	-0.0436873	-0.00860996	0.00783555	0.0208172
1.106	-0.0493376	-0.00785404	0.010161	-0.0325787	0.00165241	-0.0524156	-0.0178673	-0.000338759	0.0150317
1.107	-0.0551327	-0.0124145	0.00547642	-0.0467047	-0.00628418	-0.0607843	-0.0277563	-0.0093834	0.00850183
1.108	-0.061565	-0.0175299	-3.92974e-05	-0.0598386	-0.0142625	-0.0686432	-0.037943	-0.0190345	0.00137657
1.109	-0.0685339	-0.0232254	-0.00612407	-0.0717864	-0.02257	-0.07588	-0.0480881	-0.0290346	-0.00614848
1.11	-0.0762579	-0.0293041	-0.012513	-0.0822982	-0.0314844	-0.082558	-0.0578625	-0.0391374	-0.0138701
1.111	-0.0851705	-0.035572	-0.0190126	-0.0913569	-0.0410053	-0.0888416	-0.067029	-0.0491005	-0.0216187
1.112	-0.0952574	-0.0416813	-0.0254429	-0.0993824	-0.0509629	-0.0947961	-0.0754858	-0.0586419	-0.0296782
1.113	-0.105794	-0.0469684	-0.0317456	-0.106943	-0.0610511	-0.100255	-0.0831375	-0.0675062	-0.0389936
1.114	-0.115893	-0.0510094	-0.038119	-0.114142	-0.0708626	-0.104979	-0.0899198	-0.0755687	-0.0501441
1.115	-0.124854	-0.054111	-0.0447697	-0.120602	-0.0799871	-0.10892	-0.0959245	-0.0828357	-0.062415
1.116	-0.132138	-0.0568934	-0.0516529	-0.126049	-0.0881722	-0.112136	-0.101262	-0.089349	-0.0743738
1.117	-0.137489	-0.0597908	-0.058565	-0.130632	-0.0953422	-0.114605	-0.105976	-0.0950886	-0.0848055
1.118	-0.140911	-0.0631027	-0.0652963	-0.134668	-0.101424	-0.116327	-0.110142	-0.100048	-0.0930162
1.119	-0.142584	-0.0670073	-0.0716514	-0.138312	-0.106358	-0.11744	-0.113906	-0.104271	-0.0988716
1.12	-0.142878	-0.0714512	-0.0774963	-0.141513	-0.110179	-0.11815	-0.117442	-0.107795	-0.102762
1.121	-0.142217	-0.0763373	-0.0828294	-0.144071	-0.112941	-0.118624	-0.120741	-0.110767	-0.105292
1.122	-0.140952	-0.0816404	-0.0877394	-0.145636	-0.114707	-0.118997	-0.123564	-0.113476	-0.106915
1.123	-0.13945	-0.0872786	-0.0922128	-0.14592	-0.115597	-0.119321	-0.125778	-0.116134	-0.107891
1.124	-0.138251	-0.0930843	-0.0960462	-0.144944	-0.115809	-0.119511	-0.127475	-0.118775	-0.108414
1.125	-0.137954	-0.098907	-0.0991068	-0.142953	-0.115583	-0.119477	-0.12878	-0.121392	-0.108668
1.126	-0.138902	-0.10467	-0.101538	-0.140106	-0.115124	-0.119209	-0.129761	-0.12398	-0.108767
1.127	-0.141013	-0.110243	-0.103577	-0.136385	-0.114545	-0.118735	-0.130407	-0.126433	-0.108824
1.128	-0.143846	-0.115335	-0.105364	-0.131882	-0.113857	-0.118118	-0.130704	-0.128574	-0.109032
1.129	-0.146944	-0.119659	-0.10695	-0.126915	-0.113075	-0.117534	-0.130736	-0.130307	-0.109487
1.13	-0.149993	-0.123172	-0.108357	-0.121785	-0.112221	-0.117183	-0.130584	-0.131578	-0.110057
1.131	-0.152725	-0.126017	-0.109652	-0.116731	-0.111273	-0.11707	-0.130194	-0.132334	-0.110585
1.132	-0.154934	-0.12826	-0.110964	-0.112037	-0.110247	-0.117047	-0.129497	-0.132677	-0.111085
1.133	-0.156371	-0.129876	-0.112379	-0.107967	-0.109258	-0.117	-0.128635	-0.132846	-0.111695
1.134	-0.156621	-0.130749	-0.113847	-0.104698	-0.108371	-0.116952	-0.127905	-0.133032	-0.112561
1.135	-0.155468	-0.130667	-0.11522	-0.102259	-0.107491	-0.116945	-0.127509	-0.133317	-0.113809
1.136	-0.153159	-0.129553	-0.116336	-0.10043	-0.106551	-0.116877	-0.127426	-0.133687	-0.11544
1.137	-0.150173	-0.127592	-0.117138	-0.0988186	-0.105622	-0.116662	-0.127505	-0.134076	-0.11728
1.138	-0.147004	-0.124941	-0.117698	-0.0971176	-0.104736	-0.116383	-0.127603	-0.134467	-0.119137
1.139	-0.14415	-0.121602	-0.118102	-0.0953104	-0.103774	-0.116109	-0.127647	-0.134963	-0.120962
1.14	-0.142053	-0.117714	-0.118385	-0.0934632	-0.102575	-0.115807	-0.127566	-0.135683	-0.122784
1.141	-0.140879	-0.113695	-0.118596	-0.0914967	-0.101059	-0.115434	-0.127204	-0.136539	-0.124425
1.142	-0.140458	-0.109993	-0.118764	-0.0893457	-0.099334	-0.114852	-0.126413	-0.137251	-0.125555
1.143	-0.14052	-0.106882	-0.118747	-0.0870391	-0.0976967	-0.113857	-0.12514	-0.137594	-0.126012
1.144	-0.140822	-0.104427	-0.118328	-0.0845817	-0.0965726	-0.112454	-0.123427	-0.137511	-0.125808
1.145	-0.141109	-0.102401	-0.117456	-0.0819612	-0.0963696	-0.110893	-0.121423	-0.136925	-0.125102
1.146	-0.141288	-0.1004	-0.116192	-0.0793017	-0.097278	-0.109351	-0.119281	-0.135686	-0.124167
1.147	-0.141471	-0.0982257	-0.114574	-0.0768507	-0.0991724	-0.10785	-0.117037	-0.133801	-0.123066
1.148	-0.141661	-0.0960208	-0.11267	-0.0747206	-0.101706	-0.106417	-0.114631	-0.131523	-0.121625
1.149	-0.141611	-0.094019	-0.110606	-0.0727815	-0.10445	-0.105068	-0.111991	-0.12911	-0.119754
1.15	-0.141072	-0.0923233	-0.108519	-0.0708951	-0.106984	-0.103773	-0.109079	-0.126601	-0.117533
1.151	-0.140019	-0.0908686	-0.106548	-0.0691498	-0.10898	-0.102476	-0.105917	-0.123869	-0.115104
1.152	-0.138531	-0.0894846	-0.104789	-0.0676844	-0.110199	-0.101044	-0.102589	-0.120782	-0.112649
1.153	-0.136551	-0.0879557	-0.103129	-0.066447	-0.110444	-0.0992436	-0.0991855	-0.117259	-0.110369
1.154	-0.134028	-0.0861004	-0.101208	-0.0653748	-0.109667	-0.0969059	-0.0957832	-0.113328	-0.108367
1.155	-0.131099	-0.0839311	-0.098695	-0.0645034	-0.107997	-0.0940783	-0.092484	-0.109172	-0.10657
1.156	-0.127916	-0.0816396	-0.0954763	-0.0638413	-0.105546	-0.0909584	-0.0893085	-0.105055	-0.10477
1.157	-0.124443	-0.0793751	-0.0916158	-0.063391	-0.102389	-0.0877963	-0.0861843	-0.101216	-0.10273
1.158	-0.120568	-0.0771811	-0.0873273	-0.0631581	-0.0987108	-0.0848003	-0.0831644	-0.0977852	-0.100354
1.159	-0.11629	-0.075052	-0.0829225	-0.0630699	-0.0947337	-0.0820065	-0.0804102	-0.094768	-0.0976644
1.16	-0.111718	-0.072933	-0.078707	-0.0629447	-0.090787	-0.0793019	-0.0779289	-0.092137	-0.0946853
1.161	-0.107048	-0.0707394	-0.0748493	-0.0624796	-0.0873659	-0.0765846	-0.0755158	-0.0898202	-0.0915307
1.162	-0.102491	-0.0684391	-0.07134	-0.0613818	-0.0847312	-0.0738504	-0.0729281	-0.0875949	-0.0884206
1.163	-0.0981865	-0.0661232	-0.0681234	-0.059654	-0.0825705	-0.0711664	-0.0700499	-0.0851456	-0.0855568
1.164	-0.0941765	-0.0638776	-0.0652384	-0.0575743	-0.0802794	-0.0686423	-0.0669364	-0.0822437	-0.0830501
1.165	-0.0904673	-0.0615839	-0.0628054	-0.0553123	-0.077496	-0.0664545	-0.0637285	-0.0788997	-0.0808256
1.166	-0.0870963	-0.0590061	-0.0609022	-0.0528655	-0.0743028	-0.0647431	-0.0605215	-0.0753225	-0.0787093
1.167	-0.0841383	-0.0559911	-0.0594915	-0.0503104	-0.0711166	-0.0634841	-0.0574111	-0.0717822	-0.0766356
1.168	-0.0816423	-0.0524719	-0.0583868	-0.0477987	-0.0684241	-0.062644	-0.0545514	-0.0685216	-0.0746232
1.169	-0.0795413	-0.0484184	-0.0572219	-0.0454484	-0.0664838	-0.0622641	-0.0520312	-0.0655713	-0.0727387
1.17	-0.0775957	-0.0438846	-0.0554978	-0.0433812	-0.0652514	-0.0622392	-0.0498587	-0.0627488	-0.071033
1.171	-0.0754476	-0.039117	-0.0527797	-0.0417304	-0.0645145	-0.062252	-0.0480011	-0.0599758	-0.0693825
1.172	-0.0728357	-0.0345587	-0.0490113	-0.0405235	-0.0640219	-0.0620359	-0.0463898	-0.0574084	-0.0676563
1.173	-0.0698034	-0.0306375	-0.0445651	-0.0396397	-0.063537	-0.0615625	-0.0450075	-0.0552577	-0.0659235
1.174	-0.0665634	-0.0275712	-0.0399629	-0.0389918	-0.0629334	-0.0609768	-0.043857	-0.053552	-0.0642841
1.175	-0.0632877	-0.0253724	-0.0356656	-0.0386531	-0.062299	-0.0604142	-0.0428873	-0.0521567	-0.0627208
1.176	-0.0601855	-0.0239525	-0.0320026	-0.0386916	-0.0618474	-0.0598311	-0.0420436	-0.0510204	-0.061206
1.177	-0.0574867	-0.023181	-0.0291192	-0.0389109	-0.0617443	-0.0590989	-0.041229	-0.0500811	-0.0597648
1.178	-0.0552408	-0.0229338	-0.0269881	-0.038841	-0.0620039	-0.0581675	-0.0402705	-0.0490871	-0.0583748
1.179	-0.0533358	-0.02308	-0.025561	-0.0380656	-0.0623831	-0.0573064	-0.0390179	-0.0478387	-0.056972
1.18	-0.0516809	-0.0234049	-0.0249168	-0.0365133	-0.0624397	-0.0575664	-0.0373417	-0.0463042	-0.0555048
1.181	-0.0502876	-0.0236591	-0.0251137	-0.0343533	-0.0617923	-0.0602025	-0.0351141	-0.0445037	-0.053863
1.182	-0.049222	-0.0236658	-0.0259284	-0.0317742	-0.0602739	-0.0652389	-0.0323264	-0.0424666	-0.0519499
1.183	-0.0484334	-0.0233049	-0.0269624	-0.0288378	-0.0578893	-0.0712513	-0.0291697	-0.0401473	-0.0498355
1.184	-0.0476578	-0.022478	-0.0279024	-0.0254494	-0.0547207	-0.0763394	-0.0259386	-0.0375099	-0.047696
1.185	-0.0466602	-0.0212372	-0.0285096	-0.0216169	-0.0509284	-0.0790299	-0.0228674	-0.0347208	-0.0464388
1.186	-0.0454463	-0.019761	-0.0286177	-0.0175413	-0.0467732	-0.0785967	-0.020138	-0.0320751	-0.0482216
1.187	-0.0440947	-0.0181106	-0.0282473	-0.0134014	-0.042469	-0.0749441	-0.0178937	-0.0298165	-0.0543139
1.188	-0.0426788	-0.0163067	-0.027582	-0.00926391	-0.0380982	-0.0684514	-0.0161089	-0.0280673	-0.0631735
1.189	-0.0413418	-0.0145741	-0.0268708	-0.00508293	-0.0336413	-0.0597945	-0.0145832	-0.0268091	-0.0719356
1.19	-0.0401361	-0.0132105	-0.0262467	-0.000792719	-0.0289741	-0.0497888	-0.013074	-0.0258955	-0.0782952
1.191	-0.0389889	-0.0123232	-0.025628	0.0035607	-0.0241226	-0.0392854	-0.0114958	-0.0251271	-0.0809291
1.192	-0.0379247	-0.0118886	-0.0249222	0.00790617	-0.0194338	-0.0290368	-0.0100522	-0.0243003	-0.0794783
1.193	-0.0370289	-0.0118764	-0.024123	0.0122243	-0.0152787	-0.0196246	-0.00897768	-0.0232746	-0.0743139
1.194	-0.0363303	-0.0122176	-0.0232137	0.0164784	-0.0118275	-0.0114598	-0.00823545	-0.0220481	-0.0661946
1.195	-0.0358781	-0.0127793	-0.0221661	0.0206478	-0.00906714	-0.00487113	-0.00764178	-0.020653	-0.0561033
1.196	-0.035687	-0.0133521	-0.0209194	0.0247799	-0.00687678	-5.48508e-05	-0.00703359	-0.0190509	-0.0450442
1.197	-0.0356379	-0.0137099	-0.0193494	0.0289054	-0.00515491	0.00314839	-0.00626631	-0.0172456	-0.0338352
1.198	-0.0356236	-0.0136832	-0.0174071	0.0329052	-0.0038834	0.00515117	-0.00522841	-0.0153787	-0.0231767
1.199	-0.0356751	-0.013175	-0.0152099	0.0364703	-0.00296967	0.0062773	-0.00387679	-0.0136066	-0.0137362
1.2	-0.0358467	-0.0121995	-0.0129532	0.0392644	-0.00216021	0.006673	-0.0023249	-0.0119965	-0.00604544
1.201	-0.0361213	-0.010857	-0.0108534	0.0411258	-0.00131376	0.00648318	-0.000784696	-0.0105628	-0.000329727
1.202	-0.0364069	-0.00925943	-0.00910453	0.0421172	-0.000468381	0.00589414	0.000644899	-0.00930039	0.00352811
1.203	-0.0365541	-0.0074935	-0.00781066	0.0424552	0.000321443	0.00499122	0.00189672	-0.00821645	0.00578833
1.204	-0.0365354	-0.00564309	-0.00697728	0.0423977	0.00095683	0.00379448	0.00282657	-0.00733434	0.00674128
1.205	-0.0364921	-0.00388836	-0.00653507	0.0421812	0.00134694	0.00241147	0.0034682	-0.00660437	0.00669925
1.206	-0.0365074	-0.00247848	-0.00639356	0.041954	0.00144162	0.0010489	0.00407398	-0.00589681	0.00590812
1.207	-0.0365469	-0.00158393	-0.00648954	0.0417133	0.00116689	-3.99473e-05	0.00472468	-0.00521509	0.00456634
1.208	-0.0365663	-0.00132424	-0.00678097	0.0413763	0.000498924	-0.00060643	0.00518368	-0.00475798	0.00288115
1.209	-0.0364997	-0.00175728	-0.00721978	0.0408682	-0.000506443	-0.000571835	0.00524427	-0.00460787	0.00108878
1.21	-0.0362774	-0.00271444	-0.00768017	0.040121	-0.00175072	-6.47169e-05	0.00502601	-0.00458238	-0.00053676
1.211	-0.0358883	-0.00388024	-0.0079192	0.039189	-0.003054	0.000807993	0.00482714	-0.00443167	-0.0018197
1.212	-0.0352916	-0.00510183	-0.00771004	0.0383024	-0.00409037	0.00203065	0.0048305	-0.00400625	-0.00274204
1.213	-0.0343671	-0.00635802	-0.00702312	0.0376464	-0.00446948	0.0035231	0.00503219	-0.00331778	-0.00326604
1.214	-0.03305	-0.00749299	-0.00600057	0.0373108	-0.00394897	0.0050462	0.0052769	-0.0024608	-0.00333193
1.215	-0.0314632	-0.00832525	-0.00482756	0.0374188	-0.00251476	0.00629665	0.0053265	-0.00153928	-0.00306413
1.216	-0.0298817	-0.00882403	-0.00370918	0.038044	-0.000411769	0.00704328	0.00509791	-0.000741986	-0.00267602
1.217	-0.0285617	-0.00904328	-0.00283959	0.0391337	0.00188402	0.00713248	0.0047485	-0.000233863	-0.00226207
1.218	-0.0275722	-0.00904062	-0.00229393	0.0406016	0.00391828	0.00652476	0.00443437	3.1597e-05	-0.00190036
1.219	-0.0268579	-0.00882865	-0.00204796	0.0423538	0.00541891	0.00535144	0.00417096	0.00023123	-0.00173349
1.22	-0.0264504	-0.00848415	-0.00210576	0.0442244	0.0062192	0.0038043	0.00390298	0.000507676	-0.00183339
1.221	-0.0264192	-0.00826213	-0.00240139	0.046051	0.00628043	0.00207902	0.00358202	0.00090899	-0.00207453
1.222	-0.0267663	-0.00837551	-0.00274269	0.047803	0.00579836	0.000450822	0.00322641	0.00114661	-0.00222149
1.223	-0.0274816	-0.00877897	-0.00303919	0.0494522	0.00510557	-0.000820597	0.00299546	0.000426362	-0.0022026
1.224	-0.0285231	-0.00926336	-0.00332684	0.0508336	0.00453053	-0.00161936	0.00316184	-0.00178697	-0.00212068
1.225	-0.0298482	-0.00961769	-0.00357499	0.0517637	0.00440795	-0.00194376	0.0038723	-0.00505667	-0.00201129
1.226	-0.0314652	-0.00968364	-0.00364137	0.0522323	0.00499438	-0.00186041	0.00499328	-0.00847064	-0.00181097
1.227	-0.0332646	-0.00934047	-0.00338093	0.0524698	0.00635775	-0.00146162	0.00632437	-0.0113231	-0.00145855
1.228	-0.0350111	-0.00852429	-0.00274074	0.052713	0.00845698	-0.000851986	0.00789175	-0.0132113	-0.000894797
1.229	-0.0365608	-0.00720992	-0.00176607	0.052982	0.0111555	-0.000155551	0.00984055	-0.013826	-8.54173e-05
1.23	-0.0378465	-0.00537085	-0.000530211	0.0532111	0.0141931	0.000555987	0.0121108	-0.0129498	0.000910101
1.231	-0.0387492	-0.00309893	0.000934121	0.053421	0.0172155	0.00132194	0.0144564	-0.0106993	0.00200455
1.232	-0.039148	-0.000683301	0.00251154	0.0536682	0.0198109	0.00219722	0.0166487	-0.00745152	0.00313129
1.233	-0.0390224	0.00152129	0.00391901	0.0539611	0.0216287	0.00317968	0.0184989	-0.00359834	0.00417637
1.234	-0.0384571	0.00329603	0.00493711	0.0543392	0.0225742	0.00407591	0.019836	0.00048449	0.00506964
1.235	-0.0376176	0.00457453	0.00553706	0.0548882	0.0229365	0.00433445	0.0204668	0.00448249	0.00586583
1.236	-0.0367372	0.00529962	0.00579031	0.0555993	0.0231835	0.00342803	0.0201181	0.00819508	0.00661084
1.237	-0.0360026	0.00552084	0.00586435	0.0563669	0.0235921	0.00129474	0.01867	0.0114088	0.00729656
1.238	-0.035422	0.00545286	0.00595196	0.0571426	0.0241161	-0.00171735	0.0163847	0.0138294	0.00786277
1.239	-0.0349003	0.00524309	0.00607431	0.0579332	0.024515	-0.0049837	0.0137336	0.0152403	0.00818443
1.24	-0.0344204	0.00491638	0.00610964	0.0586592	0.0244763	-0.00783676	0.0112038	0.0156738	0.0082131
1.241	-0.03406	0.00448715	0.00598927	0.059226	0.0236352	-0.00981491	0.00918914	0.0153539	0.00805048
1.242	-0.0338786	0.0039684	0.00571892	0.0596653	0.0217296	-0.0106339	0.00788008	0.0145049	0.00781713
1.243	-0.033873	0.00331726	0.00534287	0.0600674	0.0188225	-0.0102057	0.00729108	0.0132968	0.00751463
1.244	-0.0341325	0.00248851	0.00492244	0.0605021	0.0152679	-0.00875043	0.00734643	0.011837	0.00706045
1.245	-0.0348845	0.00157877	0.00445428	0.0610287	0.0114682	-0.00666424	0.00790662	0.010129	0.00638997
1.246	-0.0362177	0.000793304	0.00388374	0.0616469	0.0077402	-0.00432094	0.00877947	0.00824368	0.0054729
1.247	-0.0379445	0.000305552	0.00315339	0.0622082	0.00434028	-0.00201579	0.00984464	0.00650441	0.00438454
1.248	-0.0396579	0.000197438	0.00217148	0.0625134	0.00146531	6.79422e-05	0.0111426	0.0052478	0.00337573
1.249	-0.0408487	0.000412196	0.000849839	0.0625544	-0.000787749	0.00190292	0.0127846	0.00451367	0.00268123
1.25	-0.0411522	0.000797275	-0.000763526	0.0624981	-0.00233244	0.00355417	0.0148343	0.00419596	0.00223352
1.251	-0.0404905	0.00123224	-0.00243713	0.0624662	-0.00288337	0.00504279	0.0171971	0.00424853	0.00175227
1.252	-0.0390821	0.00162142	-0.00386425	0.0624875	-0.00207019	0.00631201	0.0196148	0.00458464	0.00112246
1.253	-0.037328	0.00186308	-0.00484493	0.0625441	0.000156821	0.00729488	0.0217501	0.0050715	0.00050212
1.254	-0.0355251	0.00193951	-0.00537297	0.0625094	0.00342313	0.00806755	0.0232791	0.00561055	8.81422e-05
1.255	-0.0337875	0.00196148	-0.00547906	0.0621779	0.00714379	0.00891359	0.0240648	0.00605596	-0.000106783
1.256	-0.032259	0.00207968	-0.00511583	0.061499	0.0108232	0.0101168	0.0242047	0.00620321	-0.000193213
1.257	-0.0311747	0.00237335	-0.00427803	0.060656	0.0142063	0.0117448	0.0238493	0.00599134	-0.000128136
1.258	-0.0306362	0.00281725	-0.00302045	0.0598878	0.0171266	0.0136204	0.0231021	0.00562584	0.000266627
1.259	-0.0305293	0.00330098	-0.0013952	0.0593662	0.0193681	0.0155134	0.0220919	0.00542244	0.00100644
1.26	-0.0306859	0.00369749	0.00045691	0.0591947	0.0206931	0.0172993	0.0209867	0.00552095	0.00191398
1.261	-0.0309404	0.00390854	0.00225451	0.05947	0.0209275	0.0188296	0.0198959	0.00580137	0.00280324
1.262	-0.0311856	0.00384657	0.00373971	0.0603246	0.0200132	0.0199097	0.0188606	0.00611716	0.00358664
1.263	-0.0314229	0.00348847	0.00481621	0.0617793	0.0180068	0.0204534	0.0180148	0.00642994	0.00425429
1.264	-0.0316411	0.00288491	0.00554043	0.0635716	0.0150988	0.020504	0.0175867	0.00670137	0.00479368
1.265	-0.0317581	0.00211734	0.0060617	0.0653012	0.011672	0.0201128	0.0176401	0.00686232	0.00514017
1.266	-0.0316449	0.00133176	0.00642675	0.0666978	0.00834133	0.0192392	0.0180025	0.00692043	0.00522562
1.267	-0.031178	0.000718798	0.0065438	0.0676447	0.0057311	0.0178989	0.0183955	0.00696978	0.00506178
1.268	-0.0303356	0.000437285	0.00643906	0.0680928	0.00417738	0.0163124	0.0185654	0.00703094	0.00469229
1.269	-0.0292055	0.000515122	0.00626584	0.0680319	0.00375634	0.0147444	0.0184107	0.00702693	0.00411389
1.27	-0.0279512	0.000857835	0.00609315	0.0675048	0.00440989	0.0133107	0.0179543	0.00695151	0.00333318
1.271	-0.0267315	0.00140843	0.00585085	0.0666091	0.0059914	0.0120105	0.0172228	0.00685335	0.00243967
1.272	-0.025647	0.00214379	0.00543171	0.065434	0.00820575	0.0108848	0.0162362	0.00669353	0.0015169
1.273	-0.0247913	0.0029432	0.00488607	0.0640808	0.0105008	0.0101356	0.015118	0.00637844	0.000564506
1.274	-0.0242033	0.0036082	0.00442181	0.0627179	0.0122565	0.0100324	0.0141842	0.00586805	-0.000447006
1.275	-0.0238444	0.0040248	0.00409763	0.0614567	0.0131492	0.010634	0.013788	0.00522723	-0.00145392
1.276	-0.0236824	0.00425587	0.00376355	0.0602428	0.0132425	0.0117336	0.0140284	0.00456721	-0.00218176
1.277	-0.0236664	0.00444313	0.00334518	0.0590099	0.0127571	0.0130878	0.0146819	0.00394663	-0.00234277
1.278	-0.0236393	0.00462292	0.00294582	0.057872	0.0118148	0.0144978	0.0153927	0.00341683	-0.00190083
1.279	-0.0234014	0.00466375	0.00273791	0.0569625	0.010501	0.0157583	0.0159434	0.00305686	-0.0009947
1.28	-0.0229136	0.00446543	0.00286236	0.0562245	0.00902675	0.016744	0.0164194	0.00289425	0.000218217
1.281	-0.0223367	0.00416285	0.00333907	0.055511	0.00761168	0.0174758	0.0170645	0.00297618	0.00160684
1.282	-0.0218593	0.00395965	0.00401304	0.0546682	0.00643078	0.018049	0.018011	0.00347381	0.00301971
1.283	-0.0216014	0.0038447	0.00466725	0.0535924	0.0058019	0.0184851	0.0192302	0.00450665	0.00425896
1.284	-0.0215886	0.00367365	0.00521805	0.0523253	0.00608907	0.0186269	0.0206083	0.0059425	0.00514017
1.285	-0.0217389	0.00344396	0.00567748	0.0509037	0.00729677	0.0182572	0.0219318	0.00747201	0.00559302
1.286	-0.0219463	0.00330783	0.00604621	0.0491903	0.00896148	0.0172789	0.0228976	0.00882345	0.00571227
1.287	-0.0221679	0.00336633	0.00628769	0.0470437	0.0104447	0.015734	0.0233185	0.00987811	0.005609
1.288	-0.0224659	0.0035607	0.00625369	0.0445668	0.0112859	0.013757	0.0232843	0.0106659	0.00531562
1.289	-0.0229744	0.0037372	0.00580729	0.0420862	0.0113036	0.0115754	0.0230229	0.0113202	0.00489657
1.29	-0.0237764	0.00377538	0.00504495	0.039926	0.0104304	0.00951732	0.0227218	0.0119332	0.00443127
1.291	-0.0248024	0.00364742	0.00421486	0.0382544	0.00864535	0.00778499	0.0224747	0.0124161	0.00394206
1.292	-0.0258766	0.00337122	0.00351439	0.0370822	0.00606465	0.00624218	0.022256	0.0126025	0.00349602
1.293	-0.0269035	0.00298642	0.00303993	0.0363565	0.0030169	0.00471956	0.0220054	0.0124837	0.00321459
1.294	-0.0279035	0.00252656	0.00279746	0.0360648	9.85498e-05	0.00336267	0.0217415	0.0122172	0.00312455
1.295	-0.0288162	0.00196384	0.00273128	0.0362301	-0.00199052	0.00250179	0.0215227	0.0119166	0.00317955
1.296	-0.0294267	0.0013362	0.00284492	0.0368323	-0.00288958	0.00233957	0.0214012	0.0116133	0.00334883
1.297	-0.0295657	0.00082375	0.00326106	0.0377805	-0.00270502	0.00279374	0.0214389	0.0113017	0.00361151
1.298	-0.0292812	0.000540833	0.00405362	0.0389651	-0.00166226	0.00357922	0.0216057	0.0108915	0.00398206
1.299	-0.0288027	0.000446368	0.00508575	0.0403164	8.2289e-05	0.00442977	0.0217202	0.0103497	0.00440077
1.3	-0.0283782	0.000513746	0.00608443	0.0417659	0.00237682	0.00520477	0.0215687	0.00981845	0.00463875
1.301	-0.0281531	0.00078666	0.00683404	0.0431376	0.00507598	0.00584377	0.0209733	0.00945817	0.00453767
1.302	-0.0281649	0.00126171	0.00729881	0.0441877	0.00792256	0.00629966	0.0198614	0.0093136	0.00412779
1.303	-0.0283754	0.00193943	0.00757595	0.0448237	0.0104834	0.00650242	0.0183745	0.00928684	0.00345788
1.304	-0.0288026	0.00289894	0.00778405	0.0451926	0.0124923	0.00645896	0.0166621	0.00918131	0.00257862
1.305	-0.0295133	0.00417746	0.0079833	0.045485	0.0140164	0.00634749	0.0144859	0.00883534	0.00165422
1.306	-0.0304363	0.0056557	0.0081026	0.0457542	0.0152582	0.00637424	0.0114262	0.0083104	0.000437701
1.307	-0.0313474	0.00709824	0.00803831	0.0459072	0.0164305	0.00664817	0.00754553	0.0078675	-0.00231255
1.308	-0.0319672	0.00839547	0.00785012	0.0457959	0.0176694	0.00722819	0.00352092	0.00758933	-0.00755157
1.309	-0.0320836	0.0095746	0.00769423	0.0453576	0.0189284	0.00811679	0.000165008	0.00728631	-0.0144481
1.31	-0.0316523	0.0105316	0.00771948	0.04465	0.0199736	0.009242	-0.00193601	0.0068347	-0.0211244
1.311	-0.0308225	0.0110896	0.00808345	0.0438526	0.0205486	0.0105297	-0.00242085	0.00625824	-0.0260573
1.312	-0.0298496	0.0112029	0.00876787	0.0432798	0.0205226	0.0119368	-0.00121894	0.00561453	-0.028546
1.313	-0.0288414	0.0109929	0.00951197	0.0432222	0.019845	0.0134394	0.00138924	0.00498405	-0.0285227
1.314	-0.0276581	0.0107056	0.0100742	0.0437957	0.018511	0.0149884	0.00491583	0.00445199	-0.026246
1.315	-0.0262136	0.0104928	0.0103153	0.0449712	0.0166081	0.0164157	0.00882552	0.00413659	-0.0221548
1.316	-0.0246858	0.0102417	0.0101398	0.0466209	0.0142814	0.017438	0.0127207	0.00415642	-0.0168182
1.317	-0.0233011	0.00979257	0.009572	0.0485675	0.0117045	0.0177988	0.0163644	0.00447351	-0.0108936
1.318	-0.0221408	0.00920463	0.00873875	0.0506645	0.00913694	0.0174202	0.0195464	0.00494643	-0.00502852
1.319	-0.0212229	0.00865615	0.00776639	0.0528354	0.00690076	0.0163768	0.0220403	0.00545685	0.000286128
1.32	-0.0206046	0.00820509	0.00679667	0.0549938	0.00531472	0.0147665	0.0236864	0.00548188	0.00477328
1.321	-0.020342	0.00779837	0.00601204	0.0569348	0.00465266	0.0127662	0.0245056	0.00362294	0.00830781
1.322	-0.0204303	0.00744813	0.00555453	0.0584411	0.00502861	0.0106911	0.024701	-0.00147532	0.0109102
1.323	-0.0208474	0.00722043	0.0054256	0.0594322	0.00637306	0.00882953	0.024549	-0.00959524	0.0127675
1.324	-0.0215606	0.00709854	0.0055035	0.0599335	0.00860917	0.00733103	0.0242174	-0.0189694	0.0140992
1.325	-0.0224813	0.00697722	0.00563838	0.0600353	0.0117345	0.00628306	0.0237572	-0.027529	0.0149736
1.326	-0.0235021	0.00670352	0.00573232	0.0598593	0.0156402	0.00572526	0.023231	-0.0337596	0.0153096
1.327	-0.024547	0.00615647	0.00575501	0.059508	0.0199768	0.00560343	0.0226931	-0.0369031	0.015103
1.328	-0.0255666	0.00539509	0.00571419	0.0590861	0.0241744	0.00583279	0.022194	-0.0368882	0.0145218
1.329	-0.0265882	0.00462656	0.00563084	0.0587944	0.0275263	0.00630452	0.0218663	-0.0341217	0.0137378
1.33	-0.0276504	0.00401681	0.00552751	0.0588616	0.0294712	0.00682846	0.0218651	-0.029192	0.0128547
1.331	-0.0285665	0.00366532	0.00543604	0.0592968	0.0298255	0.00719566	0.0221992	-0.0226597	0.0119171
1.332	-0.0290213	0.00369067	0.00534067	0.0598901	0.0286756	0.00726325	0.0227021	-0.015109	0.0109116
1.333	-0.0289801	0.00420795	0.0051582	0.0604504	0.0263226	0.00699402	0.0231957	-0.00722606	0.00986337
1.334	-0.02871	0.00522225	0.0048419	0.0608971	0.0233503	0.00644936	0.023619	0.000333846	0.00882692
1.335	-0.0284013	0.00658667	0.0044661	0.0612179	0.0203141	0.00573014	0.0238989	0.0070681	0.00781685
1.336	-0.0280569	0.00805194	0.00420155	0.0613976	0.0174184	0.00492287	0.0238357	0.0126202	0.00685707
1.337	-0.0277022	0.00929386	0.00413024	0.0613948	0.0147023	0.00404877	0.0233265	0.0167423	0.00597209
1.338	-0.0275191	0.0100268	0.00415693	0.0612601	0.0122659	0.00308933	0.022514	0.0192743	0.00518906
1.339	-0.0277	0.0101614	0.00416914	0.0611745	0.0102956	0.00213491	0.0216337	0.0201944	0.00461548
1.34	-0.0282311	0.00973513	0.00410498	0.0613179	0.00903974	0.0013732	0.020855	0.0197016	0.0043896
1.341	-0.0289866	0.0087906	0.00393962	0.0618039	0.00875883	0.00087727	0.0202135	0.0181776	0.00453964
1.342	-0.0299109	0.00746808	0.00376962	0.0626832	0.00961801	0.000602615	0.019717	0.0160477	0.00496003
1.343	-0.0309596	0.00606413	0.0038097	0.0639169	0.0115168	0.000550084	0.0194946	0.0134625	0.00551516
1.344	-0.0320091	0.00485392	0.00417438	0.0654116	0.0140587	0.000783714	0.0196423	0.0101326	0.0061757
1.345	-0.0329469	0.00394148	0.00468041	0.0670071	0.0167507	0.00133051	0.0200804	0.00589671	0.00701097
1.346	-0.0336991	0.0032709	0.00508134	0.0683683	0.019255	0.00214256	0.0207686	0.00121812	0.00794848
1.347	-0.0341787	0.0027732	0.00540229	0.0691877	0.0213815	0.00314717	0.0217727	-0.00310828	0.00872953
1.348	-0.0343169	0.00248486	0.00582243	0.0695365	0.0229123	0.00419367	0.0230322	-0.00638516	0.0091013
1.349	-0.034083	0.00248496	0.00646196	0.0696705	0.0237468	0.00503903	0.0243663	-0.00812608	0.00890937
1.35	-0.0335754	0.00287639	0.00734785	0.0695596	0.0240132	0.00557255	0.0255936	-0.00810965	0.00818892
1.351	-0.0330465	0.00375176	0.00843328	0.0689317	0.0238092	0.0058979	0.0264779	-0.00649597	0.00722385
1.352	-0.0326677	0.00503421	0.009597	0.0676636	0.0231075	0.0061277	0.0268197	-0.00370785	0.00637563
1.353	-0.032386	0.00650592	0.0106409	0.0658792	0.0219215	0.00623709	0.0266481	-0.00020428	0.00582574
1.354	-0.0320817	0.0079803	0.0113963	0.0637553	0.0204581	0.00617487	0.0261736	0.0035633	0.00558421
1.355	-0.0316791	0.00935673	0.0117725	0.0614553	0.0190168	0.00599743	0.0255748	0.00717268	0.00565731
1.356	-0.0311271	0.0105704	0.0117267	0.0592502	0.0177434	0.00578398	0.0248593	0.0102925	0.00601537
1.357	-0.0304243	0.0115251	0.0113755	0.0574444	0.0167404	0.0056049	0.0240007	0.0127144	0.00654419
1.358	-0.0296211	0.0121014	0.0110294	0.0561435	0.0164076	0.00561902	0.0230646	0.0143653	0.00716989
1.359	-0.028858	0.0121884	0.0109608	0.0553438	0.0174473	0.00600262	0.0220517	0.0153016	0.00788465
1.36	-0.0283288	0.0116912	0.0112122	0.0551345	0.0203157	0.00677234	0.020904	0.0156758	0.00865575
1.361	-0.0280363	0.0105352	0.0116356	0.0555696	0.0246841	0.00775268	0.0196722	0.0157137	0.00938123
1.362	-0.0277391	0.00873374	0.0120453	0.0564886	0.0296053	0.00865146	0.0184565	0.015713	0.00988909
1.363	-0.027257	0.00651841	0.012357	0.0576567	0.0341023	0.00914459	0.017314	0.0159479	0.0100426
1.364	-0.0266559	0.00433388	0.0126019	0.0589844	0.0374679	0.00897367	0.0162732	0.0164938	0.00986862
1.365	-0.0261005	0.00263674	0.0128112	0.0604641	0.0392231	0.00802453	0.0153414	0.0171888	0.00947389
1.366	-0.0255965	0.00165836	0.0129422	0.0620148	0.0391158	0.00634486	0.0145736	0.0178217	0.00887662
1.367	-0.0249155	0.00140333	0.0129392	0.063544	0.0371991	0.00410116	0.0140981	0.0183145	0.00807961
1.368	-0.023909	0.00183051	0.01275	0.0650478	0.033915	0.00157281	0.0139659	0.0186887	0.00722577
1.369	-0.0227758	0.00281983	0.012284	0.0665367	0.0299881	-0.000891146	0.0140945	0.0189258	0.00651089
1.37	-0.021868	0.00407947	0.011519	0.0679433	0.0261256	-0.00304547	0.0143427	0.0189813	0.00602224
1.371	-0.0214153	0.0053036	0.010564	0.0691141	0.0228548	-0.00477731	0.0145731	0.0189136	0.00576122
1.372	-0.0214782	0.00628744	0.00954692	0.0699206	0.0204524	-0.0060028	0.0147426	0.0188014	0.00566335
1.373	-0.0220619	0.00688359	0.00855662	0.0703431	0.0190117	-0.0066987	0.0149102	0.0186068	0.00560073
1.374	-0.0231853	0.00697456	0.00766717	0.0703614	0.0185893	-0.00687098	0.0150853	0.018266	0.00552419
1.375	-0.024804	0.00648256	0.00700253	0.0699377	0.0191249	-0.00644908	0.0151533	0.017769	0.00547397
1.376	-0.0268417	0.00545252	0.00661748	0.0691323	0.0204227	-0.00545581	0.0150253	0.017084	0.00547279
1.377	-0.0292686	0.00404905	0.00626868	0.0681508	0.0223122	-0.00418427	0.0147391	0.0161615	0.00553354
1.378	-0.0320376	0.00244262	0.00558251	0.0672598	0.0246012	-0.00301986	0.0143573	0.015095	0.00569394
1.379	-0.0350022	0.000873436	0.00437725	0.066558	0.0269402	-0.00224664	0.0138869	0.0140928	0.00601598
1.38	-0.0378751	-0.000314699	0.00269843	0.0659778	0.0288792	-0.00203636	0.0133585	0.0132951	0.00648862
1.381	-0.040279	-0.000955301	0.000709954	0.0655507	0.0299921	-0.00242783	0.0129225	0.0128118	0.00687536
1.382	-0.041877	-0.00117381	-0.00130605	0.065408	0.0300528	-0.0034143	0.0128378	0.0127254	0.00683881
1.383	-0.0425722	-0.00111464	-0.0029681	0.0655846	0.0291995	-0.00511062	0.0133295	0.0129842	0.00633491
1.384	-0.042585	-0.000790052	-0.00402701	0.0659559	0.027778	-0.00756473	0.0143361	0.0134527	0.00566595
1.385	-0.0421796	-0.000124344	-0.00444018	0.0662585	0.026056	-0.0105176	0.0155105	0.0140048	0.00506009
1.386	-0.0414701	0.000979503	-0.00416639	0.0662029	0.0241825	-0.0135701	0.0165812	0.0145643	0.00446333
1.387	-0.040534	0.00248846	-0.00314607	0.0657217	0.0222601	-0.0163075	0.0174707	0.0150691	0.00373034
1.388	-0.0394869	0.0041735	-0.00153825	0.0650357	0.0203649	-0.0182852	0.0181708	0.0154267	0.00283021
1.389	-0.0384112	0.00577615	0.000256595	0.0643725	0.0185297	-0.0191532	0.0187382	0.0155474	0.00194867
1.39	-0.037313	0.00716602	0.00191426	0.0638063	0.0166883	-0.0187108	0.0192338	0.0154203	0.00140185
1.391	-0.0361761	0.008285	0.0033346	0.0633879	0.014742	-0.0168388	0.0196216	0.0151644	0.00134767
1.392	-0.0350714	0.00907578	0.0044597	0.0631524	0.0127638	-0.013551	0.0197661	0.0149993	0.00165362
1.393	-0.0341908	0.00947472	0.00521337	0.0630514	0.0109537	-0.00914398	0.0195657	0.0150703	0.00210495
1.394	-0.0337189	0.00938446	0.00567999	0.063021	0.00937455	-0.00413204	0.019106	0.0152663	0.00259425
1.395	-0.0337321	0.00879905	0.00610585	0.0630482	0.00799141	0.000991322	0.0186148	0.0153773	0.00309593
1.396	-0.0341609	0.00792121	0.00663976	0.0631619	0.00700183	0.00579279	0.0183619	0.0153967	0.00355719
1.397	-0.0347989	0.006985	0.00724166	0.0633298	0.00673557	0.00974496	0.0185789	0.0154804	0.0038635
1.398	-0.0354381	0.0061224	0.0077822	0.0634092	0.00714384	0.0122541	0.019295	0.0156603	0.00397136
1.399	-0.0359269	0.00544325	0.00809598	0.0633417	0.00782706	0.0130852	0.0203754	0.0157663	0.00392622
1.4	-0.0361456	0.00502653	0.0081146	0.0632651	0.0084459	0.0126007	0.0217183	0.0156784	0.00371852
1.401	-0.0360913	0.00488488	0.00790009	0.0633187	0.00878827	0.011341	0.0231921	0.0154681	0.00336992
1.402	-0.035941	0.0050503	0.00746647	0.0634579	0.00871159	0.00966796	0.0245421	0.0152429	0.00305931
1.403	-0.0359639	0.00550196	0.00683126	0.06353	0.0081761	0.00792423	0.0254224	0.0151076	0.0029135
1.404	-0.0363495	0.00603205	0.00614536	0.0634793	0.00720538	0.00649338	0.0254519	0.0151977	0.00285559
1.405	-0.0371041	0.00644437	0.00558196	0.0633422	0.00579714	0.00555572	0.0244716	0.0155272	0.00280093
1.406	-0.0380786	0.00676636	0.00527036	0.0630973	0.00395319	0.00508494	0.022781	0.015971	0.002757
1.407	-0.0390198	0.00713181	0.00532649	0.0626686	0.00182765	0.00510362	0.0209219	0.0164148	0.00273104
1.408	-0.0396241	0.00760494	0.00576117	0.0619986	-0.000269926	0.00568291	0.0192962	0.0167765	0.00279154
1.409	-0.0396361	0.00806522	0.00641198	0.0611602	-0.00207458	0.00671997	0.018113	0.0169671	0.00306159
1.41	-0.0389881	0.00820328	0.0071298	0.0604152	-0.00342452	0.00798202	0.0175104	0.0169356	0.00351308
1.411	-0.0378294	0.00782828	0.00789824	0.0600296	-0.00412705	0.00937055	0.0175456	0.0167595	0.00404445
1.412	-0.0363241	0.00711591	0.00869501	0.0600645	-0.00392539	0.0109168	0.0181549	0.0165737	0.00471518
1.413	-0.034523	0.00639149	0.00950811	0.0604066	-0.00262486	0.0125693	0.0191759	0.0163818	0.00559273
1.414	-0.032483	0.00583545	0.0103396	0.0609572	-0.000274307	0.0141407	0.0203876	0.0161244	0.00653187
1.415	-0.0303545	0.00551553	0.0110508	0.0616968	0.00280086	0.0153843	0.0215782	0.0158994	0.00732184
1.416	-0.0283084	0.0055652	0.0114936	0.0625059	0.00620683	0.0160511	0.022562	0.0159034	0.00782277
1.417	-0.0264867	0.00613005	0.0116818	0.0631231	0.00964743	0.0160376	0.0231937	0.016203	0.00792113
1.418	-0.0249917	0.00712746	0.0116156	0.0634132	0.012984	0.0154917	0.0234325	0.0167128	0.00755311
1.419	-0.0238759	0.0082622	0.0111353	0.0635745	0.0163527	0.0146354	0.0233225	0.0172955	0.00680045
1.42	-0.0232009	0.00929545	0.0102007	0.0640694	0.0200573	0.0136598	0.0229332	0.0177957	0.00596427
1.421	-0.0229523	0.0101489	0.00913183	0.0652869	0.0241985	0.0127567	0.022289	0.0181008	0.00540525
1.422	-0.0229449	0.0108187	0.00833382	0.0672603	0.0285457	0.0120728	0.0213452	0.018192	0.00526136
1.423	-0.0230184	0.0113339	0.00802637	0.0697563	0.0326483	0.0117389	0.0201439	0.0181122	0.00546111
1.424	-0.0232005	0.0117081	0.00823784	0.0724486	0.0359644	0.0118809	0.0188366	0.0178682	0.00591549
1.425	-0.0236569	0.0118922	0.00881247	0.0749308	0.0380613	0.0125245	0.0174969	0.0174029	0.00658029
1.426	-0.0245056	0.0118851	0.00953866	0.0767838	0.0387173	0.0135416	0.0162176	0.0166602	0.00740297
1.427	-0.0256668	0.0117308	0.0103109	0.0778228	0.0378792	0.0147237	0.0152839	0.0156869	0.00825245
1.428	-0.0269625	0.0113874	0.0110673	0.0781607	0.0357099	0.015936	0.0149297	0.0147351	0.00896184
1.429	-0.0283127	0.0108069	0.0117263	0.0779662	0.0326623	0.0171412	0.015132	0.0140874	0.00952602
1.43	-0.0297283	0.0100758	0.0123201	0.0773133	0.0292884	0.0182886	0.0157841	0.0138311	0.010078
1.431	-0.0311588	0.00936964	0.0129713	0.0762848	0.0259044	0.019303	0.0167866	0.0139143	0.0105591
1.432	-0.0325089	0.00877628	0.013597	0.0751176	0.0225996	0.0201646	0.0179831	0.0141324	0.0106672
1.433	-0.0337776	0.00825618	0.0138983	0.0741791	0.0195207	0.0208819	0.0192473	0.0141133	0.0102227
1.434	-0.0350788	0.00780525	0.0136827	0.0738071	0.0169417	0.0214291	0.020496	0.0135771	0.00937737
1.435	-0.0365383	0.00749995	0.0129372	0.0741321	0.0151523	0.0217842	0.0215988	0.012527	0.00839629
1.436	-0.0381862	0.00742012	0.0117141	0.074989	0.0143412	0.0218904	0.0224879	0.0111949	0.00742838
1.437	-0.0399124	0.00764247	0.0102004	0.0759438	0.0145033	0.021575	0.0231945	0.0099099	0.00656981
1.438	-0.0414081	0.00817669	0.008677	0.0764533	0.0154936	0.0206478	0.0237396	0.00897745	0.00592124
1.439	-0.0422285	0.00890336	0.00727453	0.0761657	0.0171296	0.0191006	0.0241657	0.00857486	0.00551188
1.44	-0.0421021	0.00961646	0.00604183	0.0750785	0.0192744	0.0172441	0.0245165	0.00869743	0.00535668
1.441	-0.0410479	0.0100588	0.00510656	0.07343	0.021807	0.0155608	0.0247507	0.00924689	0.00549569
1.442	-0.0390744	0.0100827	0.00451087	0.0715423	0.0244559	0.0143529	0.024886	0.0101007	0.00586672
1.443	-0.0360492	0.00980592	0.00419353	0.0696777	0.0268925	0.0136564	0.0251306	0.0110847	0.0062676
1.444	-0.0319957	0.00944504	0.00416563	0.0680488	0.0289733	0.0134266	0.0256854	0.0120624	0.0064888
1.445	-0.0272806	0.0090944	0.00439841	0.0672476	0.0306916	0.0136153	0.0265141	0.0130352	0.0065081
1.446	-0.0224787	0.00875927	0.00476218	0.0683193	0.0320272	0.0140918	0.0274232	0.0141001	0.00653611
1.447	-0.018111	0.00848504	0.00525415	0.0716867	0.0329529	0.0146666	0.0282961	0.0153344	0.00677909
1.448	-0.0144864	0.00836786	0.00597707	0.0764969	0.0334918	0.0152271	0.0291589	0.0167168	0.00718661
1.449	-0.0117495	0.00846628	0.00688602	0.0813955	0.033755	0.0157502	0.0300105	0.0181726	0.0074824
1.45	-0.00994681	0.00872104	0.00780389	0.0853815	0.0338804	0.0162276	0.0307361	0.0195449	0.0074575
1.451	-0.0090042	0.00902193	0.0085844	0.0881373	0.0339167	0.0166169	0.0311824	0.0205485	0.00719221
1.452	-0.00877708	0.00933773	0.00910586	0.0898766	0.0338971	0.0168392	0.0312067	0.0209807	0.00690075
1.453	-0.00921918	0.0096462	0.00928202	0.0907801	0.0339212	0.0168403	0.0307671	0.0208411	0.00675538
1.454	-0.0103974	0.00986287	0.00916853	0.0907773	0.0340245	0.0166324	0.0299583	0.020162	0.0069348
1.455	-0.0123611	0.009976	0.00894006	0.0897942	0.0340798	0.016251	0.0289473	0.018975	0.00752677
1.456	-0.0150664	0.0100756	0.00879896	0.0878798	0.0339102	0.0157402	0.0279401	0.017478	0.00840898
1.457	-0.0183162	0.0101869	0.00889607	0.0851933	0.033441	0.0152078	0.0271466	0.015993	0.00937922
1.458	-0.0217829	0.0102564	0.00925883	0.0819745	0.0326248	0.0147673	0.0266756	0.0147795	0.0102845
1.459	-0.0251384	0.0103114	0.00982439	0.0785013	0.0312988	0.0144693	0.0264378	0.014041	0.0110089
1.46	-0.0281195	0.0104483	0.0104266	0.075158	0.0293541	0.014395	0.0262418	0.0139017	0.0115244
1.461	-0.0305157	0.010682	0.0108103	0.0723384	0.0269204	0.014681	0.025944	0.0142798	0.0119797
1.462	-0.0321978	0.010954	0.0108421	0.0701251	0.0242221	0.0154002	0.0254848	0.0149354	0.0125219
1.463	-0.0332095	0.0112365	0.0105307	0.0683505	0.0214438	0.0165126	0.0249131	0.0156105	0.0130609
1.464	-0.033752	0.0114992	0.00991218	0.0669667	0.0187107	0.0179661	0.0243533	0.0161975	0.0133741
1.465	-0.0339643	0.0116194	0.00913161	0.0665994	0.0160841	0.0196866	0.0238978	0.0167706	0.0133147
1.466	-0.0337718	0.0114226	0.00843165	0.0686754	0.0136468	0.0213925	0.023585	0.017376	0.0128525
1.467	-0.0329944	0.0108447	0.00789138	0.0738641	0.0115588	0.0226676	0.0233936	0.0176473	0.0120622
1.468	-0.0316147	0.0100236	0.00737775	0.0809259	0.00991749	0.0232931	0.0231713	0.016697	0.0111163
1.469	-0.029851	0.00915446	0.00681351	0.0879471	0.0086235	0.0233105	0.0227023	0.0139184	0.0102824
1.47	-0.027916	0.00832732	0.00622544	0.0936891	0.00748518	0.0228641	0.0218863	0.00967996	0.00985115
1.471	-0.0259499	0.00759241	0.00564467	0.0976136	0.00641709	0.0222143	0.0207949	0.00494899	0.00992915
1.472	-0.0241291	0.00699956	0.00515561	0.0995327	0.00552198	0.0216677	0.0196392	0.000648877	0.0103661
1.473	-0.0226068	0.00653295	0.00484275	0.0994652	0.00498485	0.0213603	0.0186667	-0.00263944	0.0108869
1.474	-0.0215113	0.00616689	0.0047272	0.0975981	0.0050419	0.0212582	0.0180145	-0.00468917	0.0112554
1.475	-0.0209821	0.00590111	0.00480731	0.0942799	0.00600321	0.0212662	0.0177309	-0.00552122	0.0114169
1.476	-0.0210257	0.00566165	0.00498015	0.0900018	0.00794129	0.0213521	0.0178062	-0.00532846	0.0114994
1.477	-0.0214751	0.00527086	0.00502676	0.0852796	0.010563	0.0216079	0.0181073	-0.00435616	0.0116168
1.478	-0.0221356	0.00459351	0.00477642	0.0805459	0.0135005	0.0220464	0.0185298	-0.00274057	0.0116817
1.479	-0.0228267	0.00363047	0.00418042	0.0761793	0.0163955	0.0224698	0.0191691	-0.000538069	0.0114836
1.48	-0.0234616	0.00250947	0.00322527	0.0724327	0.0189112	0.0227688	0.0201724	0.00209487	0.0109357
1.481	-0.024168	0.00150823	0.00187834	0.0693446	0.0208427	0.0230648	0.0215013	0.00487099	0.0101217
1.482	-0.0250728	0.000903425	0.000180483	0.0669255	0.0220337	0.0233829	0.0229571	0.00753533	0.00917051
1.483	-0.0260849	0.000754854	-0.00171192	0.0651986	0.0222701	0.0235966	0.0244353	0.0100015	0.00822083
1.484	-0.0270183	0.000991975	-0.00364923	0.0641637	0.0214137	0.0236295	0.0259054	0.0122448	0.00732391
1.485	-0.0278	0.00153823	-0.0055452	0.063947	0.0196132	0.0234645	0.0271781	0.0142043	0.00645797
1.486	-0.0284781	0.00231331	-0.0072712	0.0645954	0.0171983	0.0231413	0.0280205	0.0158698	0.00581191
1.487	-0.0290251	0.00331799	-0.00861249	0.0658617	0.0143796	0.0227027	0.0283249	0.017237	0.00567836
1.488	-0.0293315	0.00458704	-0.00937218	0.067502	0.0112634	0.0221379	0.0281217	0.0181977	0.00603625
1.489	-0.0293422	0.00602221	-0.0094546	0.069368	0.00796717	0.0214678	0.0276516	0.0185975	0.00661893
1.49	-0.0290675	0.00742694	-0.00883547	0.0711522	0.00455784	0.020781	0.0272631	0.0183801	0.0072887
1.491	-0.0286205	0.00864604	-0.00755908	0.0724981	0.00108051	0.0201837	0.0271691	0.0176332	0.00808532
1.492	-0.0282243	0.00960107	-0.00580782	0.0732919	-0.00224397	0.0197634	0.0273567	0.016507	0.00901655
1.493	-0.0280884	0.0102268	-0.00386087	0.0736176	-0.00490931	0.0195455	0.027692	0.0152251	0.00995445
1.494	-0.028248	0.0104299	-0.00198262	0.0736384	-0.00637044	0.0194472	0.0281202	0.0141122	0.0106939
1.495	-0.0285567	0.0101537	-0.000362779	0.0735666	-0.00643255	0.0193221	0.0287079	0.0134033	0.0110614
1.496	-0.0288648	0.00951308	0.000909744	0.0736178	-0.00529726	0.0190065	0.0295182	0.0131631	0.0110101
1.497	-0.0290118	0.0088029	0.00181234	0.0740515	-0.00331129	0.018424	0.0305433	0.0134239	0.0106945
1.498	-0.0287682	0.00829082	0.00233977	0.075162	-0.000731202	0.0177683	0.0316228	0.0141957	0.0103726
1.499	-0.0280517	0.00804166	0.00253497	0.0770073	0.00229581	0.0174	0.0324324	0.015423	0.0101605
1.5	-0.0270097	0.00800857	0.00257919	0.0792366	0.00557207	0.0174734	0.0327801	0.0169013	0.0100436
1.501	-0.0258808	0.00819362	0.00282449	0.081327	0.0088127	0.0177951	0.0328322	0.0182583	0.0100152
1.502	-0.0249002	0.0086307	0.00359894	0.0828525	0.0117773	0.0180479	0.0328413	0.0192694	0.00998652
1.503	-0.0241809	0.00937495	0.00494351	0.0835571	0.0143914	0.0180627	0.0327813	0.0199713	0.00980025
1.504	-0.0237423	0.010482	0.00670921	0.0833803	0.0167497	0.017892	0.0323535	0.0203427	0.00939091
1.505	-0.0236557	0.0118514	0.00884089	0.0824129	0.0189746	0.0176334	0.0312813	0.0202195	0.00878535
1.506	-0.0240355	0.0132076	0.0113212	0.080858	0.021083	0.0173085	0.0296107	0.0195141	0.00810112
1.507	-0.0249484	0.0142119	0.0139627	0.0789834	0.0229804	0.0168679	0.0276698	0.0183078	0.00753801
1.508	-0.0262888	0.0145679	0.0164569	0.0769773	0.0245273	0.0161339	0.025785	0.0167357	0.00726919
1.509	-0.0278159	0.0141415	0.0185317	0.0749599	0.0256718	0.014976	0.0241587	0.0147597	0.00733121
1.51	-0.0292781	0.0129917	0.0199917	0.073084	0.0264657	0.0135974	0.0229088	0.0120537	0.00761257
1.511	-0.0303763	0.0113589	0.0207117	0.0714554	0.0268657	0.0123263	0.0220763	0.00833944	0.00802524
1.512	-0.0309453	0.00956987	0.0206676	0.0700646	0.0267488	0.011061	0.0216497	0.00390881	0.00850249
1.513	-0.0312026	0.00785004	0.0199469	0.0688661	0.0261622	0.00928459	0.0216261	-0.00039259	0.00881921
1.514	-0.0314958	0.00633512	0.0187668	0.0677971	0.0253042	0.00673628	0.0219391	-0.00372976	0.00877393
1.515	-0.0319613	0.00513804	0.0173912	0.0668128	0.0243552	0.00332225	0.0224232	-0.00568886	0.00845696
1.516	-0.032501	0.00437764	0.0159746	0.065997	0.0235561	-0.0015574	0.022945	-0.00620479	0.00807481
1.517	-0.0328888	0.00422361	0.0147038	0.0654421	0.0232698	-0.00843912	0.0234495	-0.00538489	0.00765161
1.518	-0.0329237	0.004773	0.0138322	0.0650863	0.023782	-0.0167802	0.0239351	-0.00344839	0.0070937
1.519	-0.0325452	0.0059588	0.0133539	0.0648228	0.0251288	-0.025226	0.0244549	-0.000740613	0.00639712
1.52	-0.031834	0.00759148	0.0130023	0.0646696	0.0271673	-0.032403	0.0249984	0.00228091	0.00563521
1.521	-0.0309348	0.00939456	0.0125343	0.0647358	0.0296625	-0.037197	0.0253928	0.00521607	0.00491408
1.522	-0.030015	0.011038	0.0118766	0.0650743	0.0323071	-0.0388599	0.0255018	0.00779926	0.00441587
1.523	-0.029247	0.0122521	0.0111529	0.0657016	0.0348193	-0.0371741	0.0253662	0.00981764	0.00432237
1.524	-0.028705	0.0129748	0.0105655	0.0666545	0.036946	-0.0324256	0.0250847	0.0111725	0.00470747
1.525	-0.0283996	0.0132519	0.0102246	0.0679493	0.0384518	-0.025271	0.0247616	0.0119507	0.00553335
1.526	-0.0284149	0.0130879	0.0101599	0.0695075	0.0393377	-0.0165907	0.0245099	0.0123207	0.00671238
1.527	-0.0288371	0.0125334	0.0103624	0.0710937	0.0398851	-0.00734104	0.024445	0.0124741	0.00817841
1.528	-0.0296215	0.011788	0.0107203	0.0724834	0.0402804	0.00160393	0.0245973	0.0125127	0.00984199
1.529	-0.030574	0.0111634	0.011082	0.0736765	0.040324	0.00968674	0.0248282	0.0123942	0.0115719
1.53	-0.0314246	0.010879	0.0114319	0.0748788	0.0396607	0.0166614	0.0250039	0.0121647	0.0132566
1.531	-0.0319316	0.0108683	0.0119027	0.0762888	0.0381899	0.0223293	0.0250637	0.0119906	0.0147448
1.532	-0.0319674	0.0109484	0.0125638	0.0778887	0.0360861	0.0265483	0.0249049	0.0119977	0.0158298
1.533	-0.0315344	0.0111188	0.0132965	0.0795287	0.0336316	0.0294067	0.0244134	0.0122911	0.0163864
1.534	-0.0307071	0.0115033	0.0138931	0.0809897	0.0310992	0.0311055	0.0235887	0.0129256	0.0163917
1.535	-0.0296196	0.0120969	0.014192	0.0819018	0.0286848	0.0318058	0.0226236	0.0137627	0.0158632
1.536	-0.0284883	0.0127145	0.0141627	0.0819473	0.0266472	0.0316601	0.0218024	0.0145378	0.0148836
1.537	-0.02759	0.0131553	0.013867	0.0810325	0.0253273	0.0308336	0.0213276	0.0150454	0.013606
1.538	-0.0271276	0.0132891	0.0133918	0.0792211	0.0248847	0.029466	0.0212161	0.0151854	0.0122225
1.539	-0.0271205	0.013	0.0128368	0.076662	0.0251707	0.0276442	0.0212603	0.0150064	0.0108704
1.54	-0.0274957	0.0122788	0.0123195	0.0735244	0.0257393	0.0255103	0.0212321	0.0146847	0.00958725
1.541	-0.0282021	0.0113251	0.0119608	0.0699861	0.0259067	0.0232943	0.0210905	0.0143483	0.0084466
1.542	-0.029181	0.0103574	0.0114799	0.0661966	0.0250382	0.0211331	0.0209135	0.014038	0.00755765
1.543	-0.0303086	0.00940188	0.0097469	0.062254	0.022882	0.0191125	0.0207404	0.0137719	0.00693564
1.544	-0.0314025	0.00832316	0.00567545	0.0582891	0.0196088	0.0174171	0.0205292	0.0135672	0.00653019
1.545	-0.032249	0.00703174	-0.00042284	0.0545734	0.0157059	0.0161774	0.0202417	0.0134924	0.00626517
1.546	-0.0326595	0.00561247	-0.0071553	0.0515295	0.0119732	0.0153894	0.0198597	0.0136048	0.00604667
1.547	-0.0325532	0.00419384	-0.0132181	0.0495576	0.00928799	0.0150824	0.0193879	0.013852	0.00584568
1.548	-0.0319632	0.00282166	-0.0178156	0.0488053	0.00807837	0.0152733	0.0189033	0.0142264	0.00566382
1.549	-0.0310227	0.00151262	-0.020571	0.0490638	0.0081393	0.0158108	0.0185154	0.014879	0.00544083
1.55	-0.0299787	0.000253142	-0.0215236	0.0499616	0.00901912	0.0165037	0.0183448	0.0158153	0.00513322
1.551	-0.0290342	-0.000996874	-0.0211405	0.0512495	0.010428	0.0172944	0.0184636	0.0167163	0.00473267
1.552	-0.02825	-0.00216089	-0.0200622	0.0526939	0.0122516	0.0181724	0.0187908	0.0173259	0.00422705
1.553	-0.0277292	-0.00304989	-0.0187188	0.0538982	0.0144677	0.0190225	0.0191406	0.0176991	0.0036321
1.554	-0.0276212	-0.00348374	-0.017199	0.0545117	0.0170968	0.0196568	0.0193365	0.0179439	0.00294879
1.555	-0.0279339	-0.00330713	-0.0154394	0.0543763	0.0200625	0.0199082	0.0192897	0.0180221	0.00216847
1.556	-0.028482	-0.00246475	-0.0134349	0.0534383	0.0231585	0.0197227	0.019009	0.0178714	0.0013731
1.557	-0.0289934	-0.00108441	-0.0111887	0.0517361	0.0261487	0.0192197	0.0185851	0.0175483	0.000733822
1.558	-0.0293309	0.000617036	-0.00863179	0.0494696	0.0288377	0.0185983	0.0181617	0.017147	0.000357631
1.559	-0.0295518	0.00244517	-0.00574388	0.0470289	0.0310998	0.0180576	0.0178583	0.0167187	0.000215644
1.56	-0.0297525	0.00415956	-0.00260353	0.0448012	0.0328325	0.0177201	0.0177074	0.0162639	0.000308521
1.561	-0.0300229	0.00539739	0.000655375	0.0429786	0.0339571	0.0175536	0.0176572	0.0156935	0.000746796
1.562	-0.0304655	0.00591624	0.00389221	0.0416436	0.0345209	0.0174889	0.0176495	0.015022	0.0015621
1.563	-0.0310716	0.00581971	0.00697485	0.0408608	0.0346078	0.0175468	0.0176219	0.0144859	0.00259077
1.564	-0.0316419	0.00536254	0.00966416	0.0406819	0.0341993	0.0178277	0.0174559	0.014242	0.00360081
1.565	-0.0318994	0.0047432	0.0116611	0.0410868	0.0332953	0.0183485	0.0170481	0.0142403	0.00439989
1.566	-0.0315484	0.00413304	0.0128647	0.0418772	0.0320315	0.0189703	0.0164484	0.0143958	0.00483648
1.567	-0.0303333	0.00370628	0.0133999	0.0427884	0.0305763	0.0195839	0.0158487	0.0146126	0.00488349
1.568	-0.028296	0.00359989	0.0133777	0.0437087	0.029053	0.0201511	0.0154091	0.0148302	0.00468499
1.569	-0.0258312	0.00391247	0.0127407	0.0446375	0.0276124	0.0205895	0.0151963	0.0151144	0.00444394
1.57	-0.0233963	0.00473985	0.01139	0.0455185	0.026453	0.020759	0.0152236	0.0154627	0.00434982
1.571	-0.0213279	0.00608135	0.00940044	0.0462669	0.0257173	0.0205509	0.0154099	0.0157462	0.00452643
1.572	-0.0198737	0.00776605	0.00705112	0.046868	0.0254189	0.0200222	0.0155901	0.0159354	0.00492891
1.573	-0.0192126	0.00955863	0.00473384	0.0472458	0.0255131	0.0193916	0.0156436	0.0160487	0.00536437
1.574	-0.0193591	0.0111818	0.00284679	0.0471376	0.0259764	0.0188185	0.0155294	0.0160262	0.00571195
1.575	-0.0201865	0.012366	0.00161711	0.0463314	0.0267689	0.0182974	0.0152546	0.0158066	0.00604037
1.576	-0.0215978	0.0130589	0.00100588	0.0448788	0.027781	0.0177898	0.0149102	0.0153632	0.00645499
1.577	-0.0234668	0.0134006	0.000849356	0.0429982	0.0288715	0.0172924	0.0146246	0.0147259	0.00696111
1.578	-0.025529	0.0135201	0.00100644	0.0409921	0.0299517	0.0168286	0.0144391	0.0140292	0.00751163
1.579	-0.027459	0.0134652	0.0014226	0.0391734	0.030962	0.0164576	0.0143405	0.0134166	0.00807382
1.58	-0.0289609	0.0132194	0.00213502	0.0377514	0.0317678	0.0162696	0.0144085	0.0128863	0.00860827
1.581	-0.0299516	0.0127983	0.00316611	0.0368687	0.0322068	0.0163331	0.0147758	0.0123977	0.00905951
1.582	-0.0306435	0.0123135	0.00444984	0.0366079	0.0323094	0.0166492	0.0155122	0.0120902	0.00933234
1.583	-0.0312735	0.0118887	0.0058282	0.0368835	0.0322752	0.0171769	0.016695	0.0121646	0.00929042
1.584	-0.0319095	0.0115618	0.00712071	0.0375086	0.0321444	0.0178131	0.0183296	0.0126523	0.00884924
1.585	-0.0324652	0.0112736	0.00822771	0.0383443	0.0317739	0.0184073	0.020176	0.0134146	0.00800942
1.586	-0.0327744	0.0109607	0.00907335	0.0393244	0.0310765	0.0188747	0.02188	0.0142119	0.00687034
1.587	-0.0327489	0.0106592	0.00950739	0.0404598	0.0300551	0.0192209	0.0231664	0.0147905	0.00566239
1.588	-0.0323838	0.0104712	0.00941774	0.0417315	0.0287637	0.0193907	0.0239227	0.015035	0.00466359
1.589	-0.0316938	0.0103847	0.0088876	0.0429337	0.0272163	0.0191642	0.0241355	0.0149971	0.00403162
1.59	-0.030787	0.0102451	0.00815475	0.0437576	0.0253097	0.0184201	0.0237921	0.0147729	0.00372695
1.591	-0.0298564	0.00993238	0.00747124	0.0439931	0.0231961	0.0173805	0.0229947	0.0144772	0.00360289
1.592	-0.0290549	0.00944668	0.00696931	0.0436318	0.0215614	0.0163787	0.0219806	0.0142685	0.00351192
1.593	-0.0283805	0.00889271	0.00671016	0.0428432	0.0209949	0.0155955	0.0209214	0.0142283	0.00336951
1.594	-0.0276939	0.00837777	0.0068178	0.0418817	0.0212807	0.0150973	0.0198357	0.0142265	0.00317415
1.595	-0.026931	0.00791764	0.00733213	0.0409911	0.0216874	0.0149406	0.0186994	0.0140301	0.00296623
1.596	-0.026204	0.00747232	0.00812637	0.04039	0.0216712	0.0151647	0.0176289	0.013546	0.00280329
1.597	-0.0256658	0.00699192	0.00915819	0.0402615	0.0211586	0.0157635	0.0168458	0.0129295	0.0027063
1.598	-0.0253183	0.00645837	0.0105669	0.0406537	0.0204295	0.0167101	0.0164108	0.0124396	0.00266129
1.599	-0.0249714	0.00591114	0.0124614	0.0414427	0.0198117	0.0178954	0.0162012	0.012212	0.00275457
1.6	-0.0244948	0.00543008	0.0148012	0.042402	0.0194938	0.0190725	0.0160705	0.0122889	0.00315155
1.601	-0.0240363	0.00509311	0.0173989	0.0433145	0.0194766	0.0199952	0.0158449	0.0126756	0.0038458
1.602	-0.0238967	0.00492272	0.0198751	0.0440422	0.0195764	0.0205271	0.0153944	0.0131471	0.00448605
1.603	-0.0242627	0.00493451	0.0217838	0.0445051	0.0195887	0.0206394	0.0147644	0.0131958	0.00458245
1.604	-0.025087	0.00529288	0.0228684	0.0446116	0.0194273	0.0204337	0.0140549	0.0124228	0.00396021
1.605	-0.0261858	0.00629611	0.0230966	0.0442738	0.019129	0.0200744	0.0133165	0.0108738	0.00285178
1.606	-0.0273844	0.00799272	0.0224728	0.0435826	0.0188826	0.0196447	0.0126455	0.00890933	0.00161236
1.607	-0.0285999	0.00993235	0.0209441	0.0428274	0.019031	0.0191125	0.0121436	0.00695939	0.000558585
1.608	-0.0298282	0.0114949	0.0185511	0.0422732	0.0198477	0.0184018	0.0117764	0.00539198	-0.000104756
1.609	-0.0310774	0.0123465	0.0155354	0.041984	0.0212879	0.0175054	0.0114641	0.00444309	-0.000298558
1.61	-0.0323568	0.0124891	0.012209	0.0418947	0.0229963	0.016576	0.0112123	0.00415106	1.95455e-05
1.611	-0.0336343	0.0119975	0.00891588	0.0420158	0.0245197	0.015828	0.0110916	0.00435853	0.000825255
1.612	-0.0347523	0.0108975	0.00615838	0.0423921	0.0255993	0.0153387	0.0112135	0.00483947	0.0019917
1.613	-0.0354566	0.00924776	0.00442442	0.0429783	0.0262169	0.0150667	0.0116238	0.00539977	0.00335724
1.614	-0.0355922	0.00721754	0.00383891	0.0437195	0.026411	0.0149523	0.0121914	0.00596782	0.00478106
1.615	-0.0352351	0.00511347	0.00417573	0.0446518	0.0263099	0.0148379	0.0127311	0.00662794	0.00617323
1.616	-0.0345965	0.0033199	0.00511963	0.0458616	0.0261718	0.0144319	0.0131428	0.00748957	0.00746894
1.617	-0.0339448	0.00215181	0.00639918	0.0473884	0.026157	0.0135099	0.0133221	0.00857118	0.00854285
1.618	-0.0335542	0.0017085	0.00775074	0.0491972	0.0262347	0.0121244	0.0131666	0.00979466	0.00922618
1.619	-0.0335334	0.00185939	0.00892283	0.0511378	0.0262305	0.0105605	0.0126779	0.0110377	0.0094327
1.62	-0.0337468	0.00238494	0.00976759	0.0529235	0.0258926	0.00913729	0.0119059	0.012189	0.00913171
1.621	-0.0338938	0.00312411	0.0102826	0.0543075	0.0251734	0.00806812	0.0109442	0.0131492	0.00836012
1.622	-0.0337202	0.00401914	0.0105728	0.0552652	0.0242926	0.00738447	0.00991633	0.0138283	0.00737394
1.623	-0.0332785	0.00503814	0.0107141	0.055856	0.0233873	0.00706331	0.00895027	0.0141525	0.00647936
1.624	-0.0328312	0.00601673	0.0106528	0.0560325	0.0224106	0.00722449	0.00835715	0.0140233	0.00574428
1.625	-0.0325475	0.00669884	0.0103596	0.0557957	0.0213774	0.00793687	0.00864627	0.013371	0.00509331
1.626	-0.0324798	0.00702773	0.0100045	0.0552883	0.0204711	0.00902442	0.0100848	0.0123292	0.00453071
1.627	-0.0326766	0.00720152	0.00978694	0.0546199	0.0198964	0.0102845	0.01242	0.0111934	0.00415218
1.628	-0.0331381	0.00737941	0.00970729	0.0538563	0.0197792	0.0116491	0.0151833	0.0102039	0.00401476
1.629	-0.0337516	0.00753437	0.00969353	0.0531112	0.0202934	0.0131249	0.0180114	0.00953622	0.00405302
1.63	-0.0343707	0.0075998	0.00977266	0.0524893	0.0216191	0.0146588	0.0206511	0.00931498	0.00419281
1.631	-0.0349247	0.00758408	0.00997053	0.0520368	0.0236753	0.0161055	0.022921	0.00950336	0.00442945
1.632	-0.0354751	0.00758047	0.0102028	0.051729	0.0261397	0.0174101	0.0246997	0.00990776	0.0046939
1.633	-0.0360905	0.00770723	0.0103849	0.0514074	0.0286474	0.018595	0.0258993	0.0102538	0.00484355
1.634	-0.0366291	0.00796982	0.0106185	0.0508089	0.030859	0.019683	0.0264571	0.0103324	0.00478869
1.635	-0.0369028	0.00826554	0.0111005	0.0497152	0.0325496	0.0208328	0.0263652	0.0101258	0.00449195
1.636	-0.0369515	0.00853949	0.0117873	0.0480323	0.0336449	0.022164	0.0257386	0.00971572	0.00397294
1.637	-0.0368884	0.00877012	0.012439	0.0458322	0.0341348	0.0235337	0.0247695	0.00939302	0.00336532
1.638	-0.0366906	0.00886891	0.0129764	0.0433886	0.0340727	0.024681	0.0235586	0.00978075	0.0028253
1.639	-0.0360178	0.00880058	0.0134786	0.0410212	0.0336592	0.0253708	0.022102	0.0111832	0.00246157
1.64	-0.034215	0.00866643	0.0139807	0.0389598	0.0332166	0.0255386	0.0204829	0.0130872	0.00241632
1.641	-0.0310869	0.00873543	0.0144898	0.0374697	0.0328825	0.0253863	0.0189676	0.0147425	0.00287101
1.642	-0.0272757	0.00943555	0.0150376	0.0368304	0.032476	0.0251936	0.0178925	0.0158223	0.00390333
1.643	-0.0235619	0.0109153	0.0157779	0.0370578	0.0318276	0.0250933	0.0174979	0.0160652	0.00534575
1.644	-0.0204116	0.0127784	0.017034	0.0379272	0.0309281	0.0250536	0.0177814	0.0145606	0.00688011
1.645	-0.0180589	0.0144311	0.0189271	0.0392827	0.0298309	0.0249508	0.0185033	0.0104924	0.00827807
1.646	-0.0166049	0.0154293	0.0211446	0.0410847	0.0286425	0.0246893	0.0194454	0.00438331	0.00941519
1.647	-0.0160417	0.0155835	0.023196	0.0432395	0.0274776	0.0242935	0.0204919	-0.00228174	0.0101455
1.648	-0.0162656	0.0149693	0.0247068	0.0455409	0.0263845	0.0238483	0.0214136	-0.0080844	0.0103848
1.649	-0.0170916	0.0138335	0.0255818	0.0477247	0.0253784	0.023386	0.0219768	-0.0121225	0.0102191
1.65	-0.018273	0.0123893	0.0259244	0.0495971	0.0244275	0.0228226	0.0221701	-0.0140418	0.00980819
1.651	-0.0195996	0.0107513	0.0258204	0.0510941	0.0234001	0.0220365	0.0220216	-0.0138837	0.00924248
1.652	-0.0209275	0.0090925	0.0253039	0.0522126	0.0222088	0.0210189	0.021452	-0.0119579	0.00849344
1.653	-0.0221456	0.00772729	0.0244536	0.052946	0.0208713	0.0198565	0.0204038	-0.0087192	0.00748823
1.654	-0.023211	0.00697739	0.0234127	0.0532265	0.0193741	0.0185868	0.0189726	-0.00463229	0.00620533
1.655	-0.0241297	0.00698166	0.0223369	0.0529726	0.0176739	0.0171996	0.0174339	-0.000142376	0.00471155
1.656	-0.0249369	0.00761625	0.0213018	0.0522152	0.0158366	0.0157968	0.0161547	0.00432569	0.00315717
1.657	-0.0256954	0.00859004	0.0202516	0.0510932	0.0140912	0.0146184	0.0154096	0.00841936	0.00177714
1.658	-0.0263761	0.00963921	0.0191423	0.0497887	0.0126984	0.0138778	0.0152642	0.0118955	0.000819417
1.659	-0.0268251	0.0106185	0.0180436	0.0485312	0.0118039	0.0136247	0.0155616	0.0146422	0.00036275
1.66	-0.0269224	0.0114446	0.0170605	0.0475652	0.0115311	0.0138108	0.0159338	0.0166678	0.000351477
1.661	-0.026701	0.0120784	0.0162674	0.0470224	0.0120194	0.0144319	0.0160039	0.0180048	0.000722051
1.662	-0.0263409	0.0125585	0.015704	0.0468877	0.0132552	0.0154865	0.0157321	0.0186916	0.00129568
1.663	-0.0260278	0.0129406	0.0153736	0.0470717	0.0150462	0.016806	0.0153936	0.0188796	0.00180732
1.664	-0.0257728	0.0132146	0.0152097	0.0474502	0.0171332	0.0181531	0.0152473	0.0187749	0.00211616
1.665	-0.0254395	0.0133019	0.0151474	0.0478813	0.0192235	0.0195108	0.015431	0.0184478	0.00218959
1.666	-0.0249183	0.0131213	0.0152063	0.0482319	0.0209907	0.0209403	0.01598	0.0178847	0.00202921
1.667	-0.0242252	0.0126844	0.0153976	0.0484339	0.0222747	0.0222801	0.0167886	0.0171786	0.00174126
1.668	-0.0234337	0.0121199	0.0156015	0.0485366	0.0231329	0.0233182	0.0176581	0.0164996	0.00145784
1.669	-0.0225668	0.0116481	0.0156004	0.0486325	0.0235887	0.0240062	0.0183915	0.0159686	0.0011555
1.67	-0.0216815	0.0114919	0.0153021	0.0486848	0.0236654	0.0243094	0.0188598	0.0156241	0.000739013
1.671	-0.0208829	0.0116534	0.0148452	0.0485158	0.0234872	0.0241393	0.0190374	0.0154728	0.000215997
1.672	-0.020171	0.01191	0.0143979	0.0480319	0.0232401	0.0235056	0.0190197	0.0154701	-0.000342402
1.673	-0.019558	0.0120394	0.0140738	0.0473694	0.0232852	0.0225573	0.0189914	0.0154357	-0.000869537
1.674	-0.0191621	0.0118748	0.0139868	0.0467478	0.0240625	0.0215301	0.0190748	0.0151826	-0.00127024
1.675	-0.0190038	0.0113526	0.0141639	0.0462665	0.0256855	0.0206874	0.0192959	0.0146024	-0.00145365
1.676	-0.0190363	0.0105765	0.0145319	0.0459157	0.027871	0.0201972	0.0196855	0.0136139	-0.00132997
1.677	-0.019245	0.00969465	0.0150323	0.0456693	0.0301868	0.02005	0.0202467	0.0122995	-0.000755402
1.678	-0.0195235	0.00886494	0.0156487	0.0455532	0.032195	0.0201425	0.0209376	0.0109994	0.000320472
1.679	-0.0196958	0.00825736	0.0163832	0.0456143	0.0335247	0.0204075	0.0217245	0.0100997	0.00175073
1.68	-0.0196861	0.00793914	0.0172261	0.0457746	0.03398	0.020813	0.0225622	0.00977293	0.00332089
1.681	-0.0195563	0.00790703	0.0180716	0.0458355	0.0336378	0.0212842	0.0233484	0.00995992	0.00480249
1.682	-0.0193918	0.00815103	0.0186736	0.0456291	0.0327469	0.0216949	0.0239104	0.0105298	0.00590755
1.683	-0.0192871	0.00865247	0.0187797	0.0451404	0.0315637	0.0218991	0.0240518	0.0113407	0.0064157
1.684	-0.0193496	0.00942894	0.0183201	0.044514	0.0303801	0.0217981	0.0236955	0.0122252	0.00637064
1.685	-0.019546	0.0105197	0.0173888	0.0439007	0.0294233	0.021427	0.0229941	0.0131192	0.00599311
1.686	-0.0197254	0.0119443	0.0160766	0.0433229	0.0286838	0.0208937	0.0222133	0.0140553	0.0054947
1.687	-0.0198422	0.0136241	0.0143882	0.0426867	0.0280559	0.020279	0.021564	0.0149347	0.00503804
1.688	-0.0200296	0.0153074	0.0123974	0.0418873	0.0274681	0.0195882	0.0211741	0.0155592	0.00472198
1.689	-0.0204552	0.0167136	0.0104668	0.0409278	0.0268647	0.0187913	0.0210711	0.015847	0.00461704
1.69	-0.0211736	0.0177055	0.0091433	0.0398908	0.0262175	0.0179901	0.0211556	0.0158892	0.00471624
1.691	-0.0220765	0.0182246	0.00880723	0.0387622	0.02551	0.0173466	0.0212628	0.0158772	0.00480884
1.692	-0.0230051	0.0182213	0.00948758	0.0374587	0.0247213	0.0168593	0.0212845	0.01595	0.00467069
1.693	-0.0239681	0.0177137	0.0109288	0.0360452	0.0237696	0.0164401	0.0211817	0.0160834	0.00435712
1.694	-0.0250687	0.0167914	0.0127446	0.0347181	0.0225006	0.0161277	0.0209822	0.0161795	0.00408726
1.695	-0.0262659	0.0155829	0.0145998	0.0336529	0.0208525	0.0160352	0.0208884	0.0162186	0.00396699
1.696	-0.0274013	0.014201	0.0162051	0.0329508	0.0189555	0.0161731	0.0211067	0.0161969	0.00403158
1.697	-0.0282877	0.0127502	0.0172405	0.0325959	0.0169752	0.01652	0.0215852	0.0158885	0.00436199
1.698	-0.028698	0.0114028	0.017522	0.0324602	0.0150307	0.0170913	0.0221985	0.0148867	0.00497258
1.699	-0.0285256	0.0103379	0.0171356	0.0323936	0.0133697	0.0178257	0.0229029	0.0129958	0.00577106
1.7	-0.0279809	0.00967425	0.0163072	0.0322569	0.0123755	0.0185815	0.0235062	0.010412	0.0066571
1.701	-0.0274159	0.00946976	0.015232	0.0319553	0.012281	0.0191557	0.0237139	0.00756287	0.00758559
1.702	-0.0270078	0.0106838	0.0141386	0.0315083	0.0130137	0.0192854	0.0233991	0.00496961	0.00856805
1.703	-0.0267322	0.0160811	0.0133463	0.0309636	0.0144285	0.0188655	0.0225501	0.00311988	0.0095584
1.704	-0.0264981	0.0276735	0.0130174	0.030413	0.0164418	0.0180937	0.0212559	0.0022527	0.010353
1.705	-0.0262202	0.0439283	0.0130249	0.0301256	0.0188151	0.0172993	0.0197758	0.00233861	0.0107038
1.706	-0.0258726	0.0612045	0.0131595	0.0303709	0.0211076	0.0166936	0.01844	0.00320933	0.0105121
1.707	-0.0254996	0.0761958	0.013334	0.0312518	0.0228431	0.0163115	0.0175133	0.00457918	0.00983605
1.708	-0.0251925	0.0866973	0.0135516	0.0327537	0.0237182	0.016209	0.0170365	0.00613435	0.00884305
1.709	-0.025068	0.0916243	0.0137662	0.0347134	0.0237447	0.0165322	0.0168118	0.00767268	0.00777279
1.71	-0.0251702	0.0908707	0.0139082	0.0368744	0.0231459	0.0173271	0.0166351	0.00907537	0.00672897
1.711	-0.025438	0.0850156	0.0139395	0.0390411	0.0221204	0.0184476	0.0164359	0.0102613	0.00563602
1.712	-0.0257846	0.0750908	0.013821	0.0410328	0.0207851	0.0196242	0.0161846	0.0112406	0.004482
1.713	-0.0261486	0.0624831	0.0135584	0.0426199	0.0193633	0.0206307	0.015867	0.01212	0.00337309
1.714	-0.0265422	0.0486359	0.013243	0.0436464	0.0181923	0.0214313	0.0155289	0.0129566	0.00244078
1.715	-0.0270583	0.0347611	0.0129526	0.0440957	0.0175738	0.0220455	0.0152568	0.0136416	0.00181194
1.716	-0.0277215	0.0218032	0.0126582	0.0440264	0.0177266	0.0223803	0.0151091	0.0140369	0.00150189
1.717	-0.028425	0.0104452	0.0123221	0.0435671	0.0186484	0.0223903	0.0150259	0.0140914	0.00136855
1.718	-0.0291601	0.00113131	0.0120005	0.0429195	0.0200801	0.0221574	0.0149131	0.0137487	0.00124912
1.719	-0.0301005	-0.00592831	0.0117951	0.0422793	0.0216932	0.0217045	0.0147311	0.0129925	0.00108005
1.72	-0.0313886	-0.0107473	0.0118084	0.0417499	0.0231994	0.0209398	0.0144723	0.0119905	0.000882418
1.721	-0.0329904	-0.0134864	0.0120576	0.041328	0.0243954	0.019782	0.0141859	0.0109955	0.000642658
1.722	-0.0347012	-0.014374	0.0123888	0.0409741	0.0252497	0.0183562	0.0139343	0.0101605	0.000283556
1.723	-0.0362211	-0.0136905	0.0125686	0.040644	0.0258568	0.0169866	0.0137186	0.00951289	-0.000222634
1.724	-0.0372741	-0.0118903	0.0124555	0.0402928	0.0262492	0.0159103	0.0134805	0.00900908	-0.000777886
1.725	-0.0377036	-0.00955875	0.0120868	0.0399149	0.0263903	0.0152279	0.0131569	0.00860338	-0.00118871
1.726	-0.0374084	-0.00709614	0.0116433	0.0395272	0.026295	0.0150332	0.0127813	0.00834151	-0.00129195
1.727	-0.036306	-0.00464617	0.0113524	0.0391526	0.0260198	0.0153591	0.0124905	0.0083157	-0.00103617
1.728	-0.0344759	-0.00230349	0.0113139	0.0388435	0.0256146	0.016116	0.0123712	0.00851428	-0.000429862
1.729	-0.0321673	-0.000232159	0.0114775	0.0386519	0.0251623	0.0171287	0.0124195	0.00883709	0.000479607
1.73	-0.0296494	0.00138417	0.0118373	0.03862	0.0248049	0.0181834	0.0127206	0.00919187	0.00158662
1.731	-0.0271151	0.00247531	0.0123847	0.0387309	0.0246655	0.0191029	0.0135037	0.00946897	0.00274208
1.732	-0.0246429	0.00313805	0.0129924	0.038843	0.024772	0.01986	0.0149149	0.0095218	0.00381117
1.733	-0.0222462	0.003529	0.0135186	0.0387935	0.024971	0.0205628	0.0168001	0.00932722	0.00469426
1.734	-0.0199849	0.0037111	0.01392	0.0384668	0.0250565	0.0212228	0.0188145	0.00906585	0.00530231
1.735	-0.017958	0.00372698	0.0143028	0.0377836	0.0251428	0.0216188	0.0207254	0.00898176	0.0055703
1.736	-0.0162487	0.00373951	0.0147653	0.0367583	0.0255692	0.0215118	0.0224894	0.0092198	0.00541098
1.737	-0.0149385	0.00388719	0.0151609	0.0354868	0.0264347	0.0208893	0.0240918	0.00973795	0.00481334
1.738	-0.0140696	0.00419626	0.0152233	0.0341014	0.0275057	0.0198653	0.025406	0.010405	0.00396264
1.739	-0.0136176	0.00465172	0.0148321	0.0326755	0.028543	0.0185084	0.0261405	0.0111599	0.00304082
1.74	-0.0134869	0.00510826	0.0140635	0.0311132	0.0294586	0.0168981	0.0260092	0.0119519	0.00207594
1.741	-0.0135275	0.00536334	0.0131783	0.0293924	0.0301382	0.015259	0.0250721	0.0126199	0.00104835
1.742	-0.0136389	0.00543015	0.0125618	0.0277986	0.0304041	0.0139074	0.0237313	0.0129871	3.15747e-05
1.743	-0.0137669	0.00546138	0.0124562	0.0266883	0.0300711	0.0128715	0.0224044	0.0129619	-0.000802404
1.744	-0.013892	0.00551647	0.0127504	0.0262156	0.0289665	0.011627	0.0213685	0.0125084	-0.00121599
1.745	-0.0140569	0.00559306	0.0132028	0.0263503	0.0270839	0.00961223	0.0207778	0.0116905	-0.000937856
1.746	-0.0142675	0.00574425	0.0137453	0.0269952	0.0246533	0.00694853	0.0207346	0.0107581	0.00013945
1.747	-0.0144791	0.00602538	0.0143835	0.0280444	0.0220047	0.0043222	0.0212832	0.0101027	0.00180748
1.748	-0.0147036	0.00639384	0.0150518	0.0294439	0.0194083	0.00242012	0.0223105	0.0101245	0.00367086
1.749	-0.0149623	0.00676974	0.0156997	0.0311924	0.0170204	0.00164284	0.0235978	0.0110333	0.00534263
1.75	-0.0151602	0.00710454	0.0163138	0.0332052	0.0149292	0.00205512	0.0248825	0.0126784	0.00659657
1.751	-0.0152243	0.0074071	0.0168367	0.0352297	0.0132235	0.00346984	0.0258257	0.0147017	0.00744296
1.752	-0.0152247	0.00779764	0.017142	0.036935	0.0120155	0.00560472	0.026153	0.0168039	0.00797793
1.753	-0.0151445	0.00837457	0.0171404	0.0380969	0.0113444	0.00818516	0.0258863	0.0187736	0.00822317
1.754	-0.0148065	0.009041	0.0168812	0.0386869	0.0110892	0.0109526	0.025249	0.0204226	0.00818294
1.755	-0.0141922	0.0096034	0.0165015	0.0387197	0.0111356	0.0136319	0.0243285	0.0215634	0.00792479
1.756	-0.0135465	0.00995239	0.0161141	0.0381781	0.011606	0.0159233	0.0229984	0.0221052	0.00759753
1.757	-0.0130999	0.0101169	0.0157188	0.0372092	0.0126896	0.0176184	0.0211557	0.0221378	0.00743758
1.758	-0.0129254	0.0101888	0.0152741	0.0360711	0.0143129	0.0187469	0.0189827	0.0217659	0.00763308
1.759	-0.0129665	0.0101724	0.0148561	0.034869	0.0162561	0.0194931	0.016967	0.021005	0.00816895
1.76	-0.0130634	0.00995294	0.0146184	0.0336513	0.018388	0.0199894	0.0155927	0.0199519	0.00892347
1.761	-0.0130807	0.00941704	0.0146315	0.0325512	0.0206082	0.0202212	0.0150555	0.0188178	0.00975536
1.762	-0.0130195	0.00856678	0.0148062	0.0316349	0.0227889	0.0200928	0.0152779	0.017708	0.0104342
1.763	-0.0129476	0.0075318	0.0149403	0.0308194	0.0248242	0.0195497	0.0160558	0.0165867	0.0107168
1.764	-0.0128749	0.00644846	0.0148582	0.0300106	0.0266782	0.01862	0.0172244	0.0155139	0.0105316
1.765	-0.0127749	0.00545786	0.0145456	0.0292093	0.0283795	0.0174442	0.0186793	0.0146986	0.00999287
1.766	-0.0127211	0.00476	0.0141292	0.0284706	0.0299248	0.0162461	0.0201928	0.014325	0.00925476
1.767	-0.012836	0.00450817	0.0136595	0.0278067	0.0312013	0.0151681	0.0214494	0.0144069	0.00843591
1.768	-0.0131336	0.00471857	0.0130225	0.0271184	0.0320782	0.0142062	0.0222497	0.014711	0.00759606
1.769	-0.0135787	0.0053031	0.0121508	0.0262654	0.0325858	0.0133132	0.0225012	0.0149398	0.00666009
1.77	-0.0141557	0.00621367	0.0111156	0.0251594	0.0328669	0.012457	0.0221599	0.0149802	0.00553407
1.771	-0.014777	0.00741131	0.0100599	0.02378	0.033003	0.0116428	0.0212866	0.0148263	0.00436744
1.772	-0.0153056	0.00874976	0.00916835	0.0223219	0.0329986	0.0109234	0.0200832	0.0145045	0.00346422
1.773	-0.0157278	0.0100495	0.00856723	0.0212135	0.0327088	0.0102866	0.0187626	0.0141587	0.00292362
1.774	-0.0161776	0.0111162	0.00828375	0.020824	0.0318544	0.00962987	0.0173812	0.0139358	0.00258115
1.775	-0.0167268	0.0117572	0.00828875	0.0212914	0.030261	0.00894228	0.0159686	0.0138176	0.00226778
1.776	-0.0172731	0.0119052	0.00852774	0.0225775	0.0279685	0.00835636	0.0146773	0.0137093	0.00194488
1.777	-0.0176907	0.011602	0.00898631	0.0245218	0.0252047	0.0080385	0.0136757	0.013532	0.0016007
1.778	-0.017935	0.0109082	0.00961658	0.02692	0.0222701	0.00814444	0.0131189	0.0132683	0.0012029
1.779	-0.0179817	0.0100062	0.0102888	0.0297052	0.0194157	0.0087824	0.0131753	0.0130226	0.00071749
1.78	-0.017773	0.00920425	0.0109645	0.0329209	0.0168931	0.00994191	0.0139466	0.012887	2.39227e-05
1.781	-0.0172956	0.00868635	0.0117584	0.0364502	0.0149459	0.0114538	0.0154241	0.0128323	-0.000967958
1.782	-0.0166411	0.00847241	0.012819	0.0400514	0.0136382	0.0130604	0.0174999	0.0128186	-0.00211738
1.783	-0.0159233	0.008585	0.0141389	0.0435914	0.0128927	0.0145601	0.0199838	0.0128823	-0.00317233
1.784	-0.0152611	0.00909661	0.0154937	0.0469365	0.0127281	0.0158214	0.0225811	0.0130677	-0.00385406
1.785	-0.0147699	0.0100983	0.0166317	0.049802	0.0132384	0.0167256	0.0248709	0.0133517	-0.00387156
1.786	-0.01447	0.0116156	0.0173998	0.0519163	0.0143526	0.0171997	0.0264922	0.0136434	-0.00309633
1.787	-0.0142646	0.0134727	0.0177559	0.0531503	0.0157852	0.0172889	0.0273646	0.0138567	-0.00163653
1.788	-0.014039	0.0153171	0.0177471	0.0534625	0.0172195	0.0171297	0.0275924	0.013996	0.000220788
1.789	-0.0137696	0.0167727	0.0174108	0.0529259	0.018439	0.0167729	0.0272498	0.0140997	0.00214133
1.79	-0.0135039	0.0175768	0.0167894	0.0518093	0.019292	0.0160774	0.0264393	0.0141909	0.00393848
1.791	-0.0132767	0.017703	0.01601	0.0504781	0.0196722	0.0149338	0.0253671	0.0142923	0.0055802
1.792	-0.0130732	0.0172701	0.0152313	0.0491385	0.0196074	0.0135297	0.0242218	0.0144087	0.00699543
1.793	-0.0129389	0.0163749	0.014515	0.0477552	0.0192403	0.0122244	0.0231178	0.0145378	0.00801853
1.794	-0.013043	0.0151227	0.0138357	0.0462993	0.0187184	0.011326	0.0221102	0.014696	0.00857205
1.795	-0.0134707	0.0135799	0.0132572	0.0448618	0.0182268	0.0110195	0.0212055	0.0149101	0.00876122
1.796	-0.0140918	0.0117979	0.0129386	0.043533	0.0180339	0.0113012	0.0204402	0.0151599	0.00874956
1.797	-0.0147006	0.0100142	0.0129372	0.0424141	0.0183427	0.0120465	0.0199801	0.0153352	0.00862923
1.798	-0.0151605	0.00854069	0.0131555	0.0415971	0.019142	0.0131351	0.0200419	0.0153466	0.00841134
1.799	-0.0154487	0.00758	0.0134999	0.0411019	0.0203044	0.0144389	0.0206765	0.0152459	0.00810522
1.8	-0.0156472	0.00724849	0.0139175	0.0409404	0.0217157	0.015823	0.021723	0.0151555	0.00772747
1.801	-0.0158219	0.00751616	0.0142832	0.0410703	0.0232858	0.0171803	0.0229422	0.0151599	0.00727945
1.802	-0.0158998	0.00816564	0.0144588	0.0412717	0.0249237	0.0184109	0.0241294	0.015254	0.006815
1.803	-0.0157316	0.00892242	0.0144292	0.041262	0.0264305	0.0194062	0.0251415	0.0153509	0.00641637
1.804	-0.0152416	0.00957152	0.0142775	0.0408493	0.0274912	0.0201058	0.0258174	0.0153832	0.00610182
1.805	-0.0145034	0.0100017	0.0141122	0.0399437	0.0279144	0.0205677	0.0259276	0.015345	0.00581797
1.806	-0.013699	0.010225	0.014041	0.0386217	0.0277375	0.0209216	0.0253499	0.0152438	0.00545764
1.807	-0.0130526	0.0103592	0.0140733	0.0371696	0.0270873	0.021254	0.0242101	0.0150795	0.00493075
1.808	-0.0127619	0.0105054	0.0141144	0.0359977	0.0262061	0.0216244	0.0227146	0.0148423	0.00423883
1.809	-0.0128763	0.0105719	0.0141413	0.0354429	0.0254223	0.0221286	0.0210297	0.0145496	0.00346159
1.81	-0.0132651	0.0103827	0.0142022	0.0356252	0.024886	0.0228319	0.0193787	0.0142877	0.00280387
1.811	-0.0137389	0.00988672	0.0143056	0.0364902	0.0245712	0.0236965	0.0180472	0.0140639	0.00255842
1.812	-0.0141855	0.00912425	0.0144	0.0378598	0.0244158	0.0245976	0.0172448	0.0136791	0.00283112
1.813	-0.0145792	0.00819626	0.0143831	0.0395101	0.0242985	0.025443	0.0170159	0.0129101	0.00349877
1.814	-0.0149006	0.00724091	0.0141642	0.0412641	0.0241009	0.0262198	0.0173488	0.0117117	0.004416
1.815	-0.0151712	0.00634646	0.0136867	0.0429917	0.0238158	0.0268824	0.0182167	0.0102044	0.00542843
1.816	-0.0154658	0.00556872	0.0129923	0.0445501	0.0235428	0.0272888	0.0193838	0.00861393	0.00633635
1.817	-0.0158105	0.00501352	0.0122888	0.0457835	0.023491	0.0272555	0.0204063	0.00724874	0.00697119
1.818	-0.0161932	0.00480127	0.0117745	0.0466798	0.0239571	0.0266821	0.020896	0.00640347	0.00723947
1.819	-0.0166195	0.00490305	0.0115117	0.0473936	0.025181	0.0255755	0.0207698	0.00624348	0.00709406
1.82	-0.0171504	0.00512587	0.0114283	0.0480744	0.027178	0.023974	0.020202	0.00674964	0.00653576
1.821	-0.0178952	0.00538615	0.0113197	0.048831	0.0296767	0.0219504	0.0193142	0.00769577	0.00565207
1.822	-0.0190101	0.0058462	0.0110163	0.0497563	0.032204	0.0196801	0.0181458	0.00871784	0.00459451
1.823	-0.0208274	0.00659908	0.0105353	0.0508998	0.0342389	0.0174387	0.0168567	0.00948114	0.00353596
1.824	-0.0235569	0.00744908	0.0100463	0.0521656	0.0353685	0.0154724	0.0157036	0.00982108	0.00262632
1.825	-0.0267768	0.00813004	0.00968144	0.0532167	0.0353875	0.0138985	0.0148722	0.00973988	0.00197958
1.826	-0.0297232	0.00854796	0.00936628	0.0537307	0.0342364	0.0127557	0.0144113	0.00930475	0.00169504
1.827	-0.0318772	0.00878196	0.00892883	0.0536741	0.0319829	0.0120996	0.0143002	0.00853911	0.00172053
1.828	-0.0330857	0.00891198	0.00827837	0.05317	0.0288825	0.0119829	0.0145388	0.00748817	0.00176808
1.829	-0.033426	0.00892509	0.00747689	0.0523339	0.0252496	0.012375	0.0151334	0.00636437	0.00161024
1.83	-0.033015	0.00879663	0.00672184	0.0513393	0.0214335	0.0131485	0.0159996	0.00543843	0.00128655
1.831	-0.0318855	0.00856508	0.00622184	0.0504226	0.0178587	0.0141074	0.0170176	0.00487505	0.000925461
1.832	-0.0300006	0.00831819	0.00606139	0.049702	0.0148087	0.0149967	0.0181901	0.0047556	0.000616105
1.833	-0.0274384	0.00817319	0.00612528	0.0491972	0.012346	0.0155771	0.0196147	0.0051143	0.000391341
1.834	-0.0245608	0.00825594	0.00619125	0.0490345	0.0104335	0.0157903	0.0213353	0.0058855	0.000173849
1.835	-0.0217879	0.00862293	0.00617614	0.0494084	0.00904387	0.0157529	0.0232106	0.00692018	-0.000147293
1.836	-0.0193417	0.00930171	0.00618362	0.0504116	0.00820193	0.0155914	0.0248796	0.00805371	-0.000609685
1.837	-0.0173676	0.010323	0.00628037	0.0519521	0.00787388	0.015412	0.0260247	0.00911456	-0.00123311
1.838	-0.0160139	0.0116001	0.00643223	0.0537584	0.00796903	0.015296	0.0266134	0.0098933	-0.00199194
1.839	-0.0153035	0.0129563	0.006647	0.0556083	0.00844632	0.0152257	0.0267599	0.0101471	-0.0027333
1.84	-0.0150823	0.0141817	0.0069855	0.0575046	0.0092841	0.0151686	0.0266256	0.00980788	-0.00329826
1.841	-0.0151966	0.0150503	0.00747405	0.0594503	0.0104471	0.0152066	0.026422	0.0091156	-0.00361292
1.842	-0.0156826	0.0153961	0.00808032	0.0611959	0.0117942	0.0155062	0.0262279	0.00841291	-0.00365704
1.843	-0.0165981	0.0151267	0.0087461	0.0623772	0.0129947	0.0162283	0.0259444	0.00789982	-0.00350697
1.844	-0.0177433	0.0142711	0.00941697	0.062875	0.0137576	0.0173773	0.0255633	0.00759157	-0.00333638
1.845	-0.0187661	0.0130358	0.0100514	0.0628283	0.014069	0.0187571	0.02525	0.00743519	-0.003237
1.846	-0.0194386	0.0117361	0.0106545	0.0623117	0.0140713	0.0201151	0.0250942	0.00742256	-0.00311744
1.847	-0.0197009	0.0106524	0.0112634	0.061167	0.013841	0.0212628	0.0250191	0.0076189	-0.00283486
1.848	-0.0195849	0.00993357	0.0118314	0.0590926	0.0133745	0.0221271	0.0249672	0.00806679	-0.00233442
1.849	-0.0191798	0.00962266	0.012145	0.0558836	0.0127087	0.022684	0.0250094	0.00879631	-0.00170173
1.85	-0.018563	0.00974646	0.0119773	0.0516768	0.0120422	0.022912	0.0252029	0.00996055	-0.00105178
1.851	-0.0176819	0.0102688	0.0113651	0.0470539	0.0117437	0.0228536	0.0254612	0.0116809	-0.000407762
1.852	-0.0163947	0.0110014	0.0105569	0.0428681	0.0121474	0.0226083	0.0256088	0.0137743	0.000200171
1.853	-0.0147179	0.01178	0.00972299	0.0398587	0.0133457	0.0222674	0.0254495	0.0157896	0.000676582
1.854	-0.0128994	0.0125854	0.0089064	0.0383267	0.0151347	0.0218668	0.0248833	0.0173177	0.000859227
1.855	-0.0112062	0.0133889	0.00819473	0.0380433	0.0170522	0.021421	0.0240396	0.0182007	0.00059007
1.856	-0.00970307	0.0140866	0.00775876	0.038474	0.0186317	0.0209725	0.0231326	0.0184876	-8.50664e-05
1.857	-0.00824902	0.0145843	0.00767707	0.0390806	0.0197152	0.0206212	0.0222543	0.0183187	-0.000923738
1.858	-0.00680726	0.0148437	0.00787178	0.0394317	0.0203416	0.0204854	0.0214442	0.0178304	-0.00162254
1.859	-0.00564845	0.0148337	0.00824491	0.0392688	0.0204974	0.020532	0.0207625	0.0171827	-0.00193776
1.86	-0.0050862	0.0145667	0.0087153	0.0385569	0.0202169	0.0205847	0.0202508	0.0166156	-0.00189491
1.861	-0.00518681	0.0141456	0.00922684	0.037427	0.0196241	0.0205517	0.0199608	0.0163292	-0.0017414
1.862	-0.00576093	0.0136078	0.00988365	0.0361014	0.0187892	0.0204809	0.01993	0.0163247	-0.00164584
1.863	-0.00651622	0.0129126	0.010854	0.0348775	0.0177205	0.0204381	0.0200815	0.0164507	-0.00168124
1.864	-0.00720722	0.0120648	0.0120261	0.0340831	0.0163971	0.0204001	0.020217	0.0166133	-0.00190123
1.865	-0.00767748	0.0110406	0.0130238	0.0339752	0.0148586	0.0202992	0.0201413	0.0168241	-0.00226005
1.866	-0.00791432	0.00984528	0.0135441	0.034711	0.0134118	0.0201511	0.0198253	0.0170409	-0.00269522
1.867	-0.00801081	0.00871346	0.0134338	0.0363839	0.0126143	0.0199996	0.0193853	0.0171025	-0.00321222
1.868	-0.00797407	0.00794636	0.0126766	0.0390002	0.0128747	0.0198314	0.0188844	0.0168467	-0.00376509
1.869	-0.00778608	0.00763966	0.0114759	0.042357	0.0141509	0.0195939	0.0183094	0.0162173	-0.00425634
1.87	-0.007606	0.00769332	0.0100864	0.0460062	0.0160139	0.0192002	0.0177396	0.0152237	-0.00463101
1.871	-0.00763239	0.00792307	0.00863862	0.0494415	0.0178697	0.0185787	0.0173476	0.0138616	-0.00485581
1.872	-0.00790923	0.00820917	0.0072102	0.0522945	0.0192419	0.0177365	0.0172142	0.012177	-0.00488003
1.873	-0.00837543	0.00855124	0.00587665	0.0544039	0.0199289	0.0167784	0.0172693	0.0104021	-0.00473638
1.874	-0.00896954	0.00890405	0.00478118	0.0558789	0.0199367	0.015857	0.0174195	0.00888753	-0.00468607
1.875	-0.00971275	0.00913791	0.00416314	0.0570397	0.0194005	0.0150625	0.0175913	0.00782355	-0.00501173
1.876	-0.0107009	0.0092055	0.00417372	0.0581162	0.0185705	0.0144037	0.0176501	0.00709436	-0.00562091
1.877	-0.0120139	0.00920219	0.00478989	0.0591175	0.0177713	0.0139006	0.0174792	0.00646614	-0.00606501
1.878	-0.0136164	0.00922158	0.00584075	0.0599467	0.0173194	0.0136654	0.0171547	0.00584129	-0.005929
1.879	-0.0153137	0.00920657	0.00700469	0.0604456	0.0174575	0.0138526	0.0168672	0.00526684	-0.00509923
1.88	-0.0168541	0.00908009	0.00802408	0.0604188	0.0182765	0.0145201	0.0166976	0.00483707	-0.00371294
1.881	-0.0180706	0.0089114	0.00886104	0.059738	0.0196326	0.0155446	0.0165773	0.00465542	-0.00198719
1.882	-0.0189453	0.00876539	0.00953018	0.0584387	0.0212347	0.0167037	0.0164549	0.00478458	-0.0001085
1.883	-0.0195349	0.00861785	0.0100463	0.0567272	0.0228983	0.0179117	0.0163948	0.00522781	0.00177818
1.884	-0.0198133	0.00848538	0.010463	0.0549304	0.0246039	0.019258	0.0165017	0.0059859	0.00352506
1.885	-0.019669	0.008448	0.0107718	0.0533788	0.0262072	0.020759	0.0168619	0.0070325	0.00499493
1.886	-0.0190219	0.00856955	0.0109091	0.052262	0.0273571	0.0222495	0.017486	0.00820182	0.00613281
1.887	-0.0179158	0.00887455	0.0109202	0.0516006	0.0277903	0.0235569	0.0183001	0.00926229	0.00700534
1.888	-0.0165833	0.00938485	0.0110046	0.0512704	0.0274646	0.0245983	0.019202	0.0101177	0.00770046
1.889	-0.0153648	0.0100873	0.0113305	0.0511208	0.0264672	0.0252639	0.0200197	0.0107616	0.00820627
1.89	-0.0145724	0.0109291	0.0118698	0.0511021	0.0249139	0.0254124	0.0205542	0.011075	0.00852287
1.891	-0.0144216	0.011914	0.0124517	0.0511192	0.022933	0.0249719	0.0207662	0.0109061	0.00876445
1.892	-0.0149073	0.0130276	0.0128886	0.0508836	0.0206815	0.0239792	0.0207655	0.0103726	0.00900369
1.893	-0.0157782	0.0140974	0.0130385	0.0501558	0.0182873	0.0226509	0.0206652	0.00978669	0.00926293
1.894	-0.0167289	0.014935	0.0128462	0.0489579	0.0158785	0.0213667	0.0206224	0.00929092	0.00964875
1.895	-0.0175715	0.0154559	0.0124178	0.0474337	0.0137214	0.0204741	0.0208246	0.00883865	0.0102103
1.896	-0.0182231	0.0156272	0.0119993	0.0457905	0.0121878	0.0200929	0.0213524	0.00844289	0.0108669
1.897	-0.0186355	0.0155484	0.0117927	0.0443367	0.0115158	0.02009	0.0221225	0.00827827	0.0115733
1.898	-0.0188612	0.0153818	0.0118521	0.0433593	0.0117609	0.0201997	0.0228553	0.00858761	0.0123084
1.899	-0.0190145	0.015152	0.0121432	0.042995	0.0129268	0.0201705	0.0232645	0.00949181	0.0129329
1.9	-0.019059	0.014812	0.0126062	0.0432167	0.0149641	0.0198735	0.023306	0.0108433	0.0132437
1.901	-0.0188227	0.0143743	0.0131569	0.0439626	0.0177222	0.0193049	0.0230674	0.0123426	0.0131275
1.902	-0.0182097	0.0139576	0.0136703	0.0451932	0.0208863	0.018557	0.0226351	0.0137648	0.0122111
1.903	-0.0172337	0.0137019	0.0139921	0.0467198	0.024035	0.017772	0.0221465	0.0150081	0.00876749
1.904	-0.0159294	0.0135774	0.0139882	0.0481266	0.0268659	0.0170563	0.0217047	0.0160173	-0.000164627
1.905	-0.0144266	0.0134168	0.0136572	0.0489028	0.0292287	0.0164625	0.0212874	0.0167714	-0.0159855
1.906	-0.0129927	0.0130916	0.0131793	0.0486737	0.031044	0.0160013	0.020852	0.0173312	-0.0366274
1.907	-0.0118565	0.0125781	0.0127366	0.0474029	0.0323053	0.0156046	0.0203885	0.0177462	-0.058034
1.908	-0.0110522	0.0119451	0.0123615	0.0453332	0.0329657	0.0152184	0.0198247	0.0179381	-0.0763399
1.909	-0.0104243	0.0112638	0.0120743	0.0428197	0.0328409	0.0148989	0.0190199	0.0177653	-0.0888802
1.91	-0.00982905	0.0105611	0.0119806	0.0402248	0.0318011	0.0147336	0.0179758	0.0171725	-0.0943506
1.911	-0.00933971	0.00985212	0.0121049	0.0378161	0.029995	0.0148442	0.0169199	0.0162225	-0.092632
1.912	-0.00914371	0.00916206	0.0122475	0.0357077	0.0277428	0.0153003	0.0161175	0.0150525	-0.0846293
1.913	-0.00937222	0.00858432	0.012115	0.0338801	0.0252977	0.0159302	0.0157677	0.0139065	-0.0719934
1.914	-0.0100953	0.0082259	0.0116362	0.0323532	0.0228993	0.0164643	0.015935	0.0130449	-0.056616
1.915	-0.0112557	0.0080708	0.0109709	0.0313098	0.0208387	0.0167781	0.0164471	0.012547	-0.0402114
1.916	-0.0126227	0.00807562	0.0102265	0.0309798	0.0193102	0.0169385	0.0170024	0.012307	-0.0242289
1.917	-0.0138957	0.00832851	0.00942882	0.0314927	0.0184508	0.0170609	0.0173481	0.0121434	-0.00984189
1.918	-0.0148797	0.00893675	0.00863586	0.032866	0.0183446	0.0170946	0.0173552	0.0119382	0.00219929
1.919	-0.0156382	0.00982161	0.00794787	0.0350461	0.0188189	0.0169275	0.0170187	0.0116908	0.0116322
1.92	-0.0162845	0.0107357	0.00744582	0.0378155	0.019545	0.016583	0.0163941	0.0113643	0.018583
1.921	-0.0167348	0.0114483	0.00709664	0.0407709	0.0203158	0.016179	0.0156047	0.010876	0.0233623
1.922	-0.0169163	0.0118475	0.0068628	0.0435304	0.0210892	0.0159027	0.0148784	0.0101966	0.0262103
1.923	-0.0169368	0.0118623	0.00681393	0.0458345	0.0218138	0.0158911	0.014452	0.0092708	0.0272828
1.924	-0.0169413	0.0114584	0.00697802	0.0474537	0.0223484	0.016115	0.0144799	0.00805003	0.0268553
1.925	-0.0168797	0.010772	0.00727101	0.0481358	0.0226422	0.0164999	0.0150268	0.00666141	0.0253858
1.926	-0.0165105	0.0100181	0.0075723	0.0476432	0.0226903	0.01709	0.0160297	0.00540831	0.0233519
1.927	-0.015748	0.00930095	0.00785026	0.0458455	0.0223225	0.0180816	0.0172853	0.00464017	0.0210607
1.928	-0.014809	0.00865792	0.00822872	0.0428726	0.0213357	0.0196016	0.0185486	0.00458766	0.0186783
1.929	-0.0139506	0.00813608	0.00879188	0.0391464	0.0196875	0.0215116	0.0196477	0.00523765	0.0163979
1.93	-0.0132891	0.00768978	0.00948751	0.035168	0.0174459	0.0235781	0.0205838	0.00635524	0.0144682
1.931	-0.0128862	0.00720995	0.0102834	0.031345	0.0147531	0.0256487	0.0214835	0.0076342	0.0130634
1.932	-0.0127603	0.00674652	0.0111525	0.0280838	0.0119704	0.0275086	0.0224275	0.00888973	0.0122085
1.933	-0.0128092	0.00648596	0.0118881	0.0257703	0.00961052	0.0288222	0.0234938	0.0100788	0.011796
1.934	-0.0129244	0.00654681	0.0122148	0.0245765	0.00802143	0.0293433	0.024727	0.0111709	0.0116374
1.935	-0.0130955	0.00694001	0.0121557	0.0245075	0.00744677	0.0290097	0.025952	0.0121524	0.0115981
1.936	-0.0133351	0.00763962	0.0120273	0.0255156	0.00822875	0.0278782	0.0268969	0.0130488	0.0116247
1.937	-0.0136683	0.00857801	0.0120474	0.0274107	0.010474	0.0261607	0.0273961	0.0138569	0.0116571
1.938	-0.0142063	0.00967264	0.0121931	0.029832	0.0137315	0.0242475	0.0274173	0.0145646	0.0116099
1.939	-0.014994	0.0108553	0.0123768	0.0323867	0.017276	0.0224798	0.0270479	0.0151329	0.0113833
1.94	-0.0158113	0.0119876	0.01252	0.0346631	0.0204938	0.0209905	0.0264879	0.0154287	0.0109498
1.941	-0.0164076	0.0128991	0.0125427	0.0361832	0.0230166	0.0198507	0.0259525	0.0154034	0.0103363
1.942	-0.0168277	0.0134926	0.0123996	0.036534	0.0246949	0.0190705	0.0254398	0.0152045	0.00951467
1.943	-0.0173645	0.0137459	0.0121327	0.0354865	0.025461	0.0184696	0.024821	0.0149716	0.00855737
1.944	-0.0182008	0.0137201	0.0118353	0.0329768	0.0252293	0.0178385	0.024204	0.0147705	0.00772448
1.945	-0.0190789	0.0135415	0.0115201	0.0290929	0.0240016	0.0170882	0.0238226	0.0146699	0.00723815
1.946	-0.0195254	0.0133425	0.0111519	0.0241092	0.0220821	0.0162527	0.0237008	0.014695	0.00713313
1.947	-0.019318	0.0132417	0.0108088	0.0185018	0.0200102	0.0155139	0.0236863	0.0147753	0.00725341
1.948	-0.0185123	0.0132911	0.0106551	0.0128674	0.018256	0.0150798	0.0235842	0.0148086	0.00723914
1.949	-0.0172892	0.0134122	0.0107895	0.00768729	0.0171156	0.0149968	0.0232164	0.0147351	0.00670687
1.95	-0.0158109	0.0134695	0.0111671	0.00320256	0.016775	0.0151482	0.0225656	0.014561	0.00563073
1.951	-0.0140848	0.0134204	0.0116414	-0.000389179	0.0172887	0.0154626	0.0217389	0.0143997	0.00432783
1.952	-0.0121107	0.013335	0.0121251	-0.00279465	0.0185107	0.0159245	0.020714	0.014369	0.00308675
1.953	-0.0100451	0.0132836	0.012633	-0.00374411	0.0201434	0.0163105	0.0193819	0.0144996	0.00202239
1.954	-0.00810563	0.0132226	0.0131545	-0.00317967	0.0218873	0.0162702	0.0178198	0.0148609	0.00115615
1.955	-0.00653548	0.0130059	0.0136071	-0.0013209	0.0236273	0.0156795	0.0162983	0.0154983	0.000533379
1.956	-0.00556154	0.0125301	0.0138865	0.00148302	0.0254396	0.0147373	0.0150651	0.0162656	0.000259542
1.957	-0.0052098	0.0118305	0.0139692	0.00488713	0.0273314	0.0137406	0.0141901	0.0169429	0.000434978
1.958	-0.00531132	0.0109944	0.0139371	0.00859975	0.0291375	0.012863	0.0135494	0.0173874	0.00109645
1.959	-0.00565737	0.0100654	0.0138207	0.012482	0.0309279	0.0122088	0.0130088	0.0175109	0.00217158
1.96	-0.00611435	0.00911556	0.0136168	0.0166093	0.0343696	0.0118994	0.0125919	0.0172256	0.00344519
1.961	-0.00668534	0.00823019	0.0134254	0.0211698	0.043307	0.0120047	0.0123781	0.0164876	0.00461727
1.962	-0.00743566	0.00734838	0.0133504	0.0261958	0.060503	0.012485	0.0123872	0.0154623	0.00549624
1.963	-0.00839543	0.00636168	0.0134293	0.0313919	0.0838961	0.0132132	0.0126106	0.0144775	0.00612114
1.964	-0.00952648	0.00531955	0.0136633	0.0362917	0.107711	0.0140491	0.0130206	0.0136991	0.00661373
1.965	-0.0107186	0.00438703	0.0139712	0.0404735	0.12619	0.0149508	0.0135311	0.0130764	0.0070009
1.966	-0.0118366	0.0037326	0.0142117	0.0436094	0.135739	0.0158958	0.0140191	0.01255	0.00724681
1.967	-0.0127374	0.00347161	0.0142797	0.0455195	0.135097	0.0166891	0.0144034	0.0120655	0.00740112
1.968	-0.0133272	0.00365168	0.0141483	0.0462435	0.124802	0.0171185	0.0146755	0.0115623	0.00759131
1.969	-0.0136214	0.00429359	0.0138961	0.0459755	0.10668	0.0171913	0.0148139	0.0111002	0.00779845
1.97	-0.0136649	0.00543463	0.0136385	0.0449695	0.0832773	0.0170721	0.0147111	0.0107641	0.0078392
1.971	-0.0135032	0.0069714	0.0133662	0.0434984	0.0573252	0.0169438	0.0142858	0.0104939	0.00761538
1.972	-0.0132105	0.00849403	0.0129866	0.0418447	0.0313328	0.0168597	0.0135923	0.0101591	0.00723371
1.973	-0.0128285	0.00961447	0.012444	0.040303	0.00720656	0.0167225	0.0127894	0.00971405	0.00691037
1.974	-0.0123487	0.0103021	0.0116807	0.0390396	-0.0137943	0.0164796	0.0120464	0.00921139	0.00680798
1.975	-0.0118682	0.0107456	0.0107429	0.037998	-0.0308565	0.0161968	0.0114887	0.00867267	0.00697091
1.976	-0.0116458	0.0111122	0.00984069	0.0371205	-0.0435644	0.0159394	0.011215	0.00807134	0.00736475
1.977	-0.0118449	0.01143	0.00909474	0.0364556	-0.0519783	0.0157189	0.0112792	0.00740826	0.00790141
1.978	-0.0123727	0.0116541	0.00850633	0.0359459	-0.0566836	0.0154899	0.0116594	0.00673712	0.00846171
1.979	-0.0130423	0.011757	0.00808331	0.0354151	-0.0585305	0.0151867	0.0122554	0.00621761	0.00895867
1.98	-0.0136973	0.0116493	0.0077694	0.0348509	-0.0581918	0.0148356	0.0128382	0.00603705	0.00939103
1.981	-0.0142302	0.0112147	0.00744597	0.0344712	-0.0560733	0.0144984	0.0131079	0.00625731	0.00977156
1.982	-0.0146286	0.0104787	0.00710671	0.0344127	-0.0524953	0.0141772	0.0129855	0.00687432	0.0100388
1.983	-0.0148837	0.00959381	0.00690224	0.0344628	-0.0477751	0.0138524	0.01268	0.0078772	0.0101727
1.984	-0.0149191	0.00872967	0.00691404	0.0341377	-0.0421638	0.0134626	0.0124084	0.00915537	0.0102367
1.985	-0.0147565	0.00801601	0.00705267	0.0330206	-0.0358312	0.01293	0.0122547	0.0104946	0.0102133
1.986	-0.0145965	0.00752917	0.00719114	0.0310148	-0.0289308	0.0122782	0.0122659	0.0116716	0.00998004
1.987	-0.0147153	0.00731263	0.00723655	0.0283275	-0.0216036	0.0116432	0.0124999	0.0124586	0.00945372
1.988	-0.0152639	0.00735813	0.00713619	0.0253746	-0.0141113	0.0111799	0.0129153	0.0127133	0.00870457
1.989	-0.0161264	0.00760641	0.00690614	0.0226957	-0.00700708	0.0109954	0.0133856	0.0125221	0.0078949
1.99	-0.0170571	0.00802242	0.00664055	0.0208505	-0.000919124	0.0111612	0.0138513	0.0120323	0.00716385
1.991	-0.0178869	0.0085626	0.00644845	0.0201816	0.00382151	0.0116275	0.0142999	0.0112814	0.0066324
1.992	-0.0185795	0.00906379	0.00638978	0.0206213	0.00726914	0.0121945	0.0147093	0.0103053	0.00640574
1.993	-0.0191511	0.0092777	0.00643921	0.0218999	0.00967995	0.0127477	0.0150709	0.0092128	0.006456
1.994	-0.0195839	0.00901371	0.00651215	0.0237794	0.0113369	0.0132449	0.0154227	0.00808452	0.00653418
1.995	-0.0198623	0.00826676	0.00655504	0.0260306	0.0124241	0.0135781	0.0158147	0.00690931	0.00642468
1.996	-0.0200551	0.00721258	0.00659045	0.0283739	0.0129362	0.0137193	0.0161595	0.00575547	0.00621784
1.997	-0.0202098	0.006077	0.00689639	0.0305126	0.0128251	0.013702	0.0162723	0.00488627	0.00611257
1.998	-0.020246	0.00503223	0.00812738	0.032263	0.0122257	0.0134659	0.016076	0.00452695	0.00615915
[truncated: 1,001 more rows]

## Sheet: D583A_surfer_traces
time (s)	current (nA)
0	-2.95232e-05	-5.90607e-05	-2.58311e-05	4.43204e-05	-7.38294e-05	-3.32154e-05	6.27813e-05	1.84751e-05	-4.05998e-05
0.001	-0.000195568	-0.000332152	-0.000179418	0.000264041	-0.000441058	-0.000141567	0.000370636	9.19168e-05	-0.000199712
0.002	-0.000632461	-0.00094035	-0.00063078	0.000751903	-0.0013144	-0.000246064	0.00109858	0.00016052	-0.000436319
0.003	-0.00136871	-0.00189617	-0.0015896	0.0014692	-0.00271118	-0.000162458	0.00230685	1.80087e-05	-0.000564961
0.004	-0.00236207	-0.00318895	-0.00321712	0.00234038	-0.00449335	0.000298142	0.00404183	-0.000454226	-0.000465303
0.005	-0.00366897	-0.00480777	-0.00542325	0.00325848	-0.00648681	0.00132243	0.00639417	-0.00110144	-0.000187628
0.006	-0.00536873	-0.00659149	-0.00788324	0.00415003	-0.00852792	0.00299862	0.0093556	-0.00165133	0.000103801
0.007	-0.00740748	-0.00812127	-0.0102924	0.00511763	-0.0104574	0.00513247	0.0126713	-0.00192984	0.000261283
0.008	-0.00965991	-0.00899208	-0.0124951	0.00623117	-0.0120981	0.00729529	0.0158705	-0.00190771	0.000316631
0.009	-0.0120079	-0.00914199	-0.0144109	0.00731251	-0.0133233	0.00914219	0.0184523	-0.00165842	0.000469096
0.01	-0.0144245	-0.00875727	-0.016021	0.00815753	-0.0141338	0.0104599	0.020144	-0.00120575	0.000933603
0.011	-0.0169448	-0.0080254	-0.017478	0.00872894	-0.0145673	0.0110538	0.0209995	-0.000356603	0.00183814
0.012	-0.0194631	-0.00706929	-0.018957	0.00898256	-0.0146144	0.0109596	0.0211956	0.00109586	0.00312989
0.013	-0.0217915	-0.00599195	-0.0204327	0.00880998	-0.0142434	0.0104353	0.0208296	0.00303964	0.00459525
0.014	-0.0238234	-0.00495598	-0.0218061	0.0082519	-0.0134361	0.00966225	0.0199378	0.00503429	0.00603363
0.015	-0.0254584	-0.00421771	-0.0230804	0.00747978	-0.0121791	0.00874059	0.0185904	0.00655608	0.00727537
0.016	-0.0265182	-0.00395698	-0.024278	0.00658363	-0.0104811	0.00783875	0.0169359	0.00732525	0.00811346
0.017	-0.026839	-0.0040893	-0.0252642	0.00563775	-0.00844932	0.00722707	0.0151589	0.00733195	0.00846903
0.018	-0.0264111	-0.00440293	-0.0257661	0.00493922	-0.00622551	0.00712047	0.0134117	0.00662188	0.00847876
0.019	-0.0253254	-0.00476454	-0.0255631	0.00491326	-0.00399205	0.00748274	0.0118856	0.00528811	0.00828761
0.02	-0.0236335	-0.0050625	-0.0246595	0.00578468	-0.00211692	0.00816028	0.0108431	0.0035764	0.00790085
0.021	-0.0214392	-0.00521695	-0.0233282	0.00744332	-0.000946146	0.00909436	0.0104419	0.00189644	0.00723106
0.022	-0.0190568	-0.0053636	-0.0219246	0.00953461	-0.000544367	0.010275	0.0106887	0.000644879	0.00626697
0.023	-0.0168708	-0.00570524	-0.0206803	0.0116523	-0.000796242	0.0116955	0.0115163	2.98899e-05	0.00514951
0.024	-0.0150765	-0.00625647	-0.0197183	0.0134981	-0.00153907	0.0133127	0.0127987	0.000116527	0.0040704
0.025	-0.0136747	-0.00702097	-0.0191033	0.0149366	-0.00263241	0.0149584	0.0144296	0.00083913	0.00316998
0.026	-0.0126414	-0.00808713	-0.0187742	0.0158694	-0.00398804	0.0163905	0.01636	0.00193475	0.00251969
0.027	-0.0120195	-0.00943292	-0.0185496	0.016154	-0.00544051	0.0173723	0.0185154	0.00297733	0.00216475
0.028	-0.0118867	-0.0109002	-0.0182539	0.0157548	-0.00669262	0.0176681	0.0207207	0.00360872	0.00209396
0.029	-0.0123176	-0.0122288	-0.0178175	0.0146988	-0.00748821	0.0173045	0.0227326	0.0038268	0.00227946
0.03	-0.0133618	-0.0130726	-0.0173395	0.0129806	-0.0076824	0.01691	0.0243454	0.00383989	0.00273404
0.031	-0.0149536	-0.0131714	-0.0170407	0.0107558	-0.0072008	0.0172236	0.0254369	0.0037123	0.00343245
0.032	-0.0168146	-0.0125106	-0.0170104	0.00837496	-0.00614672	0.0183438	0.0260014	0.00337833	0.00438976
0.033	-0.0185802	-0.0112557	-0.0170204	0.00617819	-0.0047801	0.0198746	0.0261127	0.00278689	0.00563809
0.034	-0.0200067	-0.00953731	-0.0167407	0.00438743	-0.00326139	0.0214515	0.0258017	0.001926	0.007023
0.035	-0.0209249	-0.00744611	-0.016093	0.00312231	-0.00165043	0.0228711	0.0251161	0.000856627	0.00830841
0.036	-0.0211484	-0.00526567	-0.0152404	0.00245666	-0.000106393	0.0239212	0.0242029	-0.000250964	0.0093597
0.037	-0.0205517	-0.00341622	-0.0143762	0.00243453	0.00114111	0.0243333	0.0232253	-0.00121258	0.0101124
0.038	-0.0191335	-0.00215655	-0.0137173	0.0030596	0.00193663	0.023912	0.0223608	-0.0019313	0.0105477
0.039	-0.0170516	-0.00151128	-0.0134661	0.00422839	0.00226212	0.0225866	0.0218265	-0.00238639	0.0107435
0.04	-0.0144794	-0.00138874	-0.0136113	0.0056267	0.00219331	0.0203836	0.0217172	-0.00263242	0.0108468
0.041	-0.0110112	-0.00172423	-0.0139644	0.00675445	0.00182523	0.017442	0.0219138	-0.00274305	0.0109271
0.042	-0.00548392	-0.00241748	-0.0143705	0.00714914	0.00123149	0.0141108	0.022311	-0.00278794	0.0108678
0.043	0.00328662	-0.00320317	-0.014786	0.0066691	0.000392051	0.0108937	0.0230085	-0.00277874	0.0104645
0.044	0.0158474	-0.00385037	-0.0152579	0.00546399	-0.00073609	0.00815099	0.0241061	-0.00254084	0.00965681
0.045	0.0319534	-0.00429526	-0.015852	0.00372804	-0.00205166	0.0059782	0.0254963	-0.00194384	0.00862607
0.046	0.0506189	-0.00450975	-0.0165617	0.00165794	-0.00336748	0.00430365	0.0270132	-0.001132	0.00770371
0.047	0.070217	-0.00442746	-0.0173036	-0.000552304	-0.00452018	0.0029464	0.0286087	-0.000288913	0.00721313
0.048	0.0885744	-0.00391097	-0.0179306	-0.00268504	-0.00538487	0.00180258	0.030265	0.000574731	0.00728698
0.049	0.10328	-0.00292075	-0.0182065	-0.0043676	-0.00588433	0.00100296	0.0317671	0.00151537	0.00777404
0.05	0.112271	-0.0017515	-0.0179248	-0.00527939	-0.00595975	0.000788669	0.0327284	0.00246809	0.00836808
0.051	0.114332	-0.000810639	-0.0171053	-0.0054175	-0.00566108	0.00143189	0.0329566	0.00322692	0.00878937
0.052	0.109228	-0.000328131	-0.015994	-0.00485561	-0.00529379	0.00312786	0.0326646	0.00362438	0.00885829
0.053	0.0976108	-0.000375733	-0.0148496	-0.00355203	-0.00527818	0.00570694	0.0321976	0.00363668	0.00854732
0.054	0.0808888	-0.000948605	-0.0138188	-0.00159261	-0.0057945	0.0078773	0.0316187	0.0033508	0.00797037
0.055	0.0609177	-0.00206716	-0.0129953	0.000724992	-0.00660394	0.00680011	0.0307276	0.00293	0.00726314
0.056	0.0396299	-0.00373876	-0.0124279	0.00304437	-0.00732547	0.000198147	0.0294328	0.00251491	0.00650224
0.057	0.0188575	-0.00579495	-0.0121355	0.00501482	-0.00779208	-0.011312	0.0278658	0.00217816	0.00564995
0.058	0.000127733	-0.00792474	-0.0121832	0.00638461	-0.00802706	-0.0251004	0.0262361	0.00202209	0.00459272
0.059	-0.0155102	-0.00982952	-0.0126803	0.00704687	-0.00804275	-0.0384763	0.0247938	0.00216534	0.00336659
0.06	-0.027508	-0.0112886	-0.0136794	0.00699521	-0.00773828	-0.0494211	0.023728	0.00264583	0.00224501
0.061	-0.0358751	-0.0121368	-0.0150511	0.00630519	-0.00702159	-0.0566874	0.0229436	0.00343451	0.00149982
0.062	-0.0410742	-0.0123455	-0.0165598	0.00504154	-0.00599711	-0.0597987	0.0221191	0.00439334	0.00120899
0.063	-0.0437321	-0.012084	-0.0180191	0.0032604	-0.00492595	-0.0588672	0.0210083	0.00522648	0.0014112
0.064	-0.0444223	-0.0114602	-0.0193064	0.00113221	-0.00399293	-0.0543829	0.0196257	0.0056486	0.00218878
0.065	-0.043585	-0.0104139	-0.0203646	-0.00106758	-0.0031591	-0.0471301	0.0181734	0.00552399	0.00349735
0.066	-0.0415466	-0.00902381	-0.0211697	-0.00299885	-0.00233217	-0.0380786	0.0168535	0.00482376	0.00511539
0.067	-0.0385313	-0.00751006	-0.0216542	-0.00432436	-0.00161049	-0.0282336	0.0158123	0.00358947	0.00669071
0.068	-0.0347602	-0.00596032	-0.0217033	-0.00484175	-0.0012631	-0.0185428	0.0151251	0.00197706	0.00788334
0.069	-0.0306326	-0.00439925	-0.0212103	-0.00452552	-0.00148303	-0.00972164	0.0147857	0.000216937	0.00860275
0.07	-0.0265749	-0.00290725	-0.0201436	-0.0035704	-0.00218437	-0.00207195	0.0148032	-0.00156298	0.00895868
0.071	-0.022751	-0.00160035	-0.0185407	-0.00234704	-0.00313316	0.00442926	0.0151857	-0.00333191	0.00899484
0.072	-0.019161	-0.000652724	-0.0164385	-0.00116148	-0.00411266	0.00992385	0.0158648	-0.0049638	0.00867341
0.073	-0.015857	-0.000230284	-0.0139469	-0.000180491	-0.00491422	0.014455	0.016811	-0.00619867	0.0080299
0.074	-0.0129378	-0.000404607	-0.0113935	0.000456648	-0.00546547	0.0177159	0.018043	-0.00679756	0.00717108
0.075	-0.0104496	-0.00114776	-0.00914548	0.000659402	-0.00583378	0.0191334	0.0194631	-0.00666822	0.00620638
0.076	-0.00847578	-0.00235835	-0.00732807	0.000448223	-0.0059788	0.0182781	0.0208244	-0.00583691	0.00524914
0.077	-0.00722537	-0.00383599	-0.00597719	-6.47017e-05	-0.00574704	0.0150967	0.0218204	-0.00438348	0.00442514
0.078	-0.00679645	-0.00524871	-0.005265	-0.000719115	-0.00503177	0.00991829	0.0222147	-0.00243476	0.00381724
0.079	-0.00704074	-0.00624819	-0.00533536	-0.00146565	-0.00383581	0.00335545	0.0219238	-0.000221846	0.00341756
0.08	-0.00769063	-0.00663363	-0.00608386	-0.00239971	-0.00226424	-0.00395674	0.0210097	0.00190136	0.00313296
0.081	-0.00846752	-0.00642372	-0.00720957	-0.00349556	-0.000408368	-0.0115538	0.0196366	0.00360607	0.00281265
0.082	-0.00907728	-0.00582428	-0.00842003	-0.00452985	0.00167203	-0.0190811	0.0180372	0.00474527	0.00235543
0.083	-0.00914291	-0.00508138	-0.0095534	-0.0052093	0.00382234	-0.0262144	0.016532	0.00534597	0.00172911
0.084	-0.00836207	-0.00433297	-0.0105446	-0.00525485	0.0057681	-0.0327059	0.0154469	0.00553287	0.000913269
0.085	-0.00676151	-0.00363362	-0.0113699	-0.0045655	0.00719435	-0.0384001	0.0149568	0.00542007	3.38108e-05
0.086	-0.00462858	-0.00305152	-0.0120827	-0.00324686	0.00788186	-0.0432048	0.0151009	0.00501901	-0.000665625
0.087	-0.00230386	-0.00269816	-0.0127766	-0.00141883	0.00774962	-0.0471014	0.0158148	0.00435438	-0.0011336
0.088	-2.61668e-05	-0.00268038	-0.0134692	0.000895127	0.00681271	-0.0501454	0.0169229	0.0035641	-0.00154771
0.089	0.00212698	-0.00302499	-0.0141025	0.00365199	0.00520196	-0.052429	0.0182604	0.00276419	-0.00208503
0.09	0.00407009	-0.00369677	-0.0146019	0.00659448	0.00309299	-0.0540658	0.0197698	0.00205839	-0.00281808
0.091	0.00554529	-0.00468748	-0.0149564	0.00932262	0.000654705	-0.0551689	0.0214512	0.00162373	-0.00371993
0.092	0.00619683	-0.00603752	-0.0151862	0.0115523	-0.00189627	-0.0557934	0.0232386	0.00150577	-0.00464028
0.093	0.00583906	-0.00770344	-0.0152322	0.0131516	-0.00431864	-0.0559114	0.0249194	0.0015928	-0.00536456
0.094	0.00456553	-0.00941845	-0.0151054	0.0140575	-0.00643043	-0.0554851	0.0262635	0.00186958	-0.00573285
0.095	0.00244977	-0.0108096	-0.0150332	0.0143496	-0.00811663	-0.054548	0.0271923	0.00240308	-0.00569582
0.096	-0.000601905	-0.0115828	-0.0152494	0.0142533	-0.00918295	-0.0531643	0.0277206	0.00320411	-0.0053898
0.097	-0.00460118	-0.011562	-0.0157641	0.013969	-0.00943714	-0.0514124	0.0278869	0.0042164	-0.00504142
0.098	-0.0093412	-0.0107684	-0.0163978	0.0136241	-0.0088879	-0.0493725	0.0277676	0.00529531	-0.00467432
0.099	-0.0145317	-0.0094061	-0.0169022	0.0133136	-0.00761656	-0.0470111	0.0274263	0.00620064	-0.00415332
0.1	-0.0198925	-0.0077029	-0.0170514	0.0131462	-0.00581167	-0.044268	0.026931	0.00671101	-0.00346888
0.101	-0.0250425	-0.00587659	-0.0166995	0.0133265	-0.00393102	-0.0411746	0.0263905	0.00674633	-0.0027498
0.102	-0.0295401	-0.00418319	-0.0157668	0.0140603	-0.00248245	-0.0377299	0.0258927	0.00634568	-0.00208966
0.103	-0.0330897	-0.00282459	-0.0142668	0.0153209	-0.0017152	-0.0339426	0.0254974	0.00556835	-0.00142006
0.104	-0.0355611	-0.00183551	-0.0124026	0.0167762	-0.00160661	-0.0299288	0.0252797	0.00446671	-0.000570058
0.105	-0.0369399	-0.00123706	-0.0105483	0.0180195	-0.00207682	-0.0257857	0.0253124	0.0031194	0.000540535
0.106	-0.0373077	-0.00111249	-0.00904782	0.0188159	-0.00307195	-0.0215638	0.0255888	0.00165847	0.00182334
0.107	-0.0368506	-0.00145615	-0.0080308	0.0190156	-0.00448797	-0.0174021	0.0259883	0.000273526	0.00305655
0.108	-0.0358891	-0.0021866	-0.00741007	0.0184264	-0.00618364	-0.0135629	0.0263176	-0.000846232	0.0039673
0.109	-0.0347872	-0.00328371	-0.00704118	0.0168852	-0.00801051	-0.0103307	0.026365	-0.00160991	0.0043737
0.11	-0.0337206	-0.00472839	-0.00697324	0.0143732	-0.00979262	-0.00791294	0.0259808	-0.00204006	0.00428183
0.111	-0.0325625	-0.00628243	-0.00742232	0.0111175	-0.0113346	-0.00636992	0.0250859	-0.00221319	0.00388237
0.112	-0.0311186	-0.00758372	-0.00839374	0.00755503	-0.0124959	-0.0055888	0.023621	-0.00225603	0.00348257
0.113	-0.0293205	-0.00847301	-0.00963125	0.00410861	-0.0132815	-0.00530682	0.0216356	-0.00234489	0.00336599
0.114	-0.027214	-0.00901126	-0.0109044	0.0010269	-0.013767	-0.00523112	0.0193387	-0.00266499	0.00364434
0.115	-0.0249802	-0.00934697	-0.0119898	-0.00157613	-0.0139002	-0.0051466	0.0169737	-0.00328738	0.0042546
0.116	-0.0228509	-0.00971159	-0.0126248	-0.00355169	-0.0135498	-0.00488657	0.0147895	-0.00403591	0.00508591
0.117	-0.0209811	-0.0103267	-0.0127671	-0.0046305	-0.01276	-0.00435141	0.0131479	-0.00465698	0.00603387
0.118	-0.0194284	-0.01124	-0.0126423	-0.00454728	-0.0117537	-0.00351916	0.0123983	-0.00504796	0.00692772
0.119	-0.0181058	-0.0122973	-0.0124828	-0.00317917	-0.0107758	-0.00245592	0.0125832	-0.00515034	0.00753024
0.12	-0.0164536	-0.0132804	-0.0124024	-0.000547542	-0.0100936	-0.00132282	0.0134951	-0.00486986	0.00769252
0.121	-0.0130346	-0.014101	-0.0124158	0.00321565	-0.00995828	-0.000252342	0.0148603	-0.00422182	0.00744628
0.122	-0.00595045	-0.0147815	-0.0124257	0.00782257	-0.0104144	0.000653868	0.0163223	-0.00334542	0.00686181
0.123	0.00599243	-0.0153295	-0.0122918	0.0127777	-0.0113104	0.00131701	0.0175261	-0.00241013	0.00588794
0.124	0.0224825	-0.0157209	-0.0119215	0.0175004	-0.012541	0.00176056	0.018301	-0.00159111	0.00448392
0.125	0.0416719	-0.0159661	-0.0112689	0.0215668	-0.0140098	0.00199784	0.0186477	-0.00104766	0.00278136
0.126	0.0606317	-0.0161548	-0.0104034	0.0247639	-0.0154257	0.00194011	0.0186419	-0.000891671	0.00100385
0.127	0.076213	-0.0163305	-0.00954742	0.0269698	-0.0164976	0.00147049	0.0184937	-0.00118577	-0.00054541
0.128	0.0860373	-0.0164144	-0.00891897	0.0281355	-0.0171435	0.00045658	0.0184774	-0.00190686	-0.00151164
0.129	0.088981	-0.0163159	-0.0085774	0.0283298	-0.0173846	-0.00119702	0.0186592	-0.00287607	-0.00171795
0.13	0.0851726	-0.0160395	-0.00853828	0.027712	-0.0172959	-0.00336852	0.0189102	-0.0039497	-0.00125649
0.131	0.0758117	-0.0156217	-0.00891403	0.0265387	-0.0170301	-0.00572527	0.0191726	-0.00523384	-0.000376683
0.132	0.0626943	-0.0149999	-0.00970354	0.0251222	-0.0167024	-0.00791464	0.0195041	-0.00681912	0.000678738
0.133	0.047627	-0.01412	-0.0106475	0.0236613	-0.0162644	-0.00967654	0.0199515	-0.00852871	0.00173617
0.134	0.0321721	-0.0131005	-0.0114914	0.0222091	-0.0156083	-0.0109041	0.0205471	-0.0101272	0.0026083
0.135	0.0175825	-0.0121321	-0.0121861	0.0207452	-0.0147213	-0.0116062	0.0213811	-0.0115374	0.00305992
0.136	0.00478729	-0.0113243	-0.0127537	0.0192538	-0.0137038	-0.0117755	0.0226017	-0.01277	0.00292718
0.137	-0.00558712	-0.0107804	-0.0130918	0.0178605	-0.0127167	-0.0113951	0.0242589	-0.0137449	0.00225642
0.138	-0.013282	-0.0107098	-0.0129992	0.0167622	-0.0118904	-0.0105459	0.0261417	-0.0143281	0.001249
0.139	-0.0183683	-0.0113313	-0.0123773	0.0159865	-0.0113618	-0.00945387	0.0278791	-0.0145836	0.000139859
0.14	-0.0210917	-0.0127204	-0.0113702	0.0153897	-0.0113457	-0.00835982	0.0291794	-0.0147131	-0.000873332
0.141	-0.0217643	-0.0147113	-0.0103366	0.0147817	-0.0119137	-0.00738441	0.0299418	-0.0148302	-0.00172653
0.142	-0.0207836	-0.0169039	-0.00969803	0.0140104	-0.0128235	-0.00662426	0.0302304	-0.0149651	-0.0024613
0.143	-0.0187175	-0.0188558	-0.00979161	0.0131013	-0.0138163	-0.00617109	0.0301991	-0.0150247	-0.00311344
0.144	-0.0161951	-0.0202157	-0.0107033	0.0122332	-0.0148864	-0.00605392	0.0299959	-0.0148355	-0.00379771
0.145	-0.0136823	-0.0207375	-0.0121701	0.0114678	-0.0160693	-0.00633052	0.029661	-0.0144094	-0.00475065
0.146	-0.0114434	-0.0203287	-0.0137773	0.0106202	-0.0171751	-0.00702752	0.0291562	-0.0140273	-0.0060989
0.147	-0.009634	-0.0189973	-0.0152073	0.00952691	-0.0178994	-0.00790905	0.0285477	-0.0140003	-0.00771083
0.148	-0.00828024	-0.0168364	-0.016363	0.00835131	-0.0180998	-0.00851259	0.0280648	-0.0144503	-0.0092921
0.149	-0.00727747	-0.0141238	-0.0173765	0.0074624	-0.0178775	-0.00846787	0.0278903	-0.0153454	-0.0105207
0.15	-0.00655701	-0.0112149	-0.0183878	0.00712339	-0.0175071	-0.0076958	0.0279991	-0.0165879	-0.0112073
0.151	-0.00613849	-0.00832599	-0.0193556	0.00740437	-0.0173259	-0.00640687	0.0282298	-0.0179835	-0.0115189
0.152	-0.00595705	-0.00558869	-0.0201456	0.00824516	-0.0175509	-0.0049714	0.0284381	-0.0192025	-0.0118091
0.153	-0.00580646	-0.00321563	-0.0206623	0.00949296	-0.0181898	-0.00365053	0.0285822	-0.0199136	-0.0121664
0.154	-0.00551352	-0.00139971	-0.0208762	0.0109679	-0.0191095	-0.00245809	0.0286747	-0.0200145	-0.0125501
0.155	-0.00503423	-0.000210611	-0.0208147	0.0126054	-0.0201542	-0.00129361	0.0287419	-0.0196307	-0.0130961
0.156	-0.0044331	0.000323546	-0.0204942	0.014411	-0.0211705	-9.73345e-05	0.0288366	-0.0189028	-0.0139419
0.157	-0.00383019	0.000248916	-0.0198547	0.0162529	-0.0219645	0.00104928	0.0290179	-0.0179323	-0.0151043
0.158	-0.00328884	-0.000296613	-0.0188375	0.0179212	-0.02243	0.00195377	0.0292903	-0.0168392	-0.0164414
0.159	-0.00282484	-0.00119309	-0.0174968	0.0192481	-0.02264	0.00255495	0.0295231	-0.0156593	-0.0175904
0.16	-0.00252816	-0.00237874	-0.0160542	0.0201081	-0.0227145	0.00290996	0.0295286	-0.014314	-0.0181615
0.161	-0.00251961	-0.0037727	-0.0148448	0.0205326	-0.0227007	0.00289695	0.0292632	-0.0127595	-0.0178346
0.162	-0.00281375	-0.00517555	-0.0141282	0.0206502	-0.0225141	0.00227944	0.0288277	-0.0109668	-0.0163317
0.163	-0.00334116	-0.00634038	-0.0139782	0.020431	-0.0220561	0.000994197	0.0283162	-0.00891633	-0.0136318
0.164	-0.0039954	-0.00709658	-0.0143205	0.0196958	-0.0214507	-0.000791402	0.0277932	-0.0067171	-0.0100918
0.165	-0.00456573	-0.00738354	-0.0149487	0.018288	-0.0209012	-0.00279084	0.0273107	-0.0045313	-0.00617799
0.166	-0.00474609	-0.00722562	-0.015608	0.0162437	-0.020399	-0.00471001	0.0268023	-0.00254949	-0.0022058
0.167	-0.00426698	-0.00664033	-0.0161024	0.0138781	-0.0198969	-0.00628494	0.026126	-0.00100967	0.00161603
0.168	-0.00300006	-0.00570077	-0.0162646	0.0116193	-0.0194959	-0.00734072	0.0252521	-5.88946e-05	0.00508225
0.169	-0.000990471	-0.00462614	-0.0160357	0.0098107	-0.0192158	-0.00778919	0.0243039	0.000333634	0.00798845
0.17	0.00162799	-0.00368329	-0.0155861	0.00866417	-0.0189613	-0.00755891	0.0235083	0.000350138	0.0101749
0.171	0.0046672	-0.00311427	-0.0151762	0.00822616	-0.0188357	-0.00668284	0.0230429	0.00024126	0.0115771
0.172	0.00772266	-0.00301806	-0.0148856	0.00839539	-0.019075	-0.00525636	0.0228652	0.000281628	0.0122598
0.173	0.0102476	-0.00326769	-0.0146442	0.00906912	-0.0196652	-0.00332302	0.0228403	0.00062954	0.0124087
0.174	0.0119015	-0.00366565	-0.0144947	0.010146	-0.0204307	-0.00100806	0.0229761	0.00124216	0.0121505
0.175	0.0125708	-0.00407762	-0.014499	0.0114669	-0.0213624	0.00152415	0.0233222	0.00204683	0.0114474
0.176	0.0120986	-0.00439487	-0.0145141	0.0128948	-0.0225073	0.00412401	0.0238058	0.00297878	0.0103629
0.177	0.010263	-0.00444678	-0.0143514	0.0142612	-0.0237355	0.0064062	0.024244	0.00399803	0.00920673
0.178	0.00700652	-0.0040664	-0.0140564	0.0153607	-0.0247794	0.00791565	0.024373	0.00518082	0.00829456
0.179	0.00253213	-0.0032578	-0.0138772	0.0161093	-0.0253717	0.00858275	0.0240393	0.00650349	0.00776791
0.18	-0.00278786	-0.00219932	-0.0140012	0.016485	-0.0253214	0.00859039	0.0232721	0.0076233	0.00762537
0.181	-0.00854389	-0.00104777	-0.0144248	0.0163919	-0.0245665	0.0080729	0.022093	0.00812669	0.00781403
0.182	-0.0143	0.000162783	-0.0150299	0.0157891	-0.0232938	0.00718454	0.0205372	0.00789823	0.00830842
0.183	-0.0195614	0.00141881	-0.0156668	0.014852	-0.0219307	0.00617398	0.0187731	0.00706541	0.00907922
0.184	-0.0239617	0.00268156	-0.0161668	0.0138106	-0.0208629	0.00530203	0.0171254	0.00578572	0.00999295
0.185	-0.0274048	0.00384853	-0.0164619	0.0127889	-0.0202475	0.00473486	0.0159223	0.00428089	0.0108458
0.186	-0.0299479	0.00469227	-0.0166286	0.0119106	-0.0201617	0.00448863	0.0152621	0.00282643	0.0114661
0.187	-0.0316874	0.00499763	-0.0166809	0.0112611	-0.020703	0.00449008	0.0151244	0.00162909	0.0117167
0.188	-0.0327464	0.00475253	-0.016522	0.010763	-0.0218482	0.00470004	0.0154682	0.000795681	0.011469
0.189	-0.033287	0.00409689	-0.0160404	0.0103072	-0.0234217	0.00507948	0.0161469	0.000393909	0.010661
0.19	-0.0334823	0.00312033	-0.0151796	0.00981086	-0.0251877	0.00553167	0.0170291	0.00049216	0.00935015
0.191	-0.0334666	0.00186995	-0.0140509	0.00916577	-0.0268654	0.00605131	0.0180488	0.00102761	0.00768756
0.192	-0.0333363	0.000499491	-0.0129124	0.00840469	-0.0282082	0.00672151	0.0190436	0.00175517	0.00596869
0.193	-0.0331428	-0.000754205	-0.0119992	0.00771496	-0.0291136	0.00755806	0.0197856	0.00246845	0.00461975
0.194	-0.0328082	-0.00167057	-0.0114235	0.00718047	-0.0295467	0.00851275	0.0201853	0.0031464	0.00390062
0.195	-0.0322035	-0.00218601	-0.0112094	0.00676718	-0.029439	0.00948127	0.0202687	0.00384441	0.00372257
0.196	-0.0310741	-0.00241216	-0.0113108	0.00643913	-0.0287225	0.010358	0.0200794	0.00450658	0.00384408
0.197	-0.028248	-0.00239785	-0.0116033	0.00615486	-0.0274079	0.0110971	0.0197591	0.00493021	0.00412296
0.198	-0.0215164	-0.00206522	-0.0119656	0.00591146	-0.025579	0.0116388	0.0195304	0.00499655	0.0045888
0.199	-0.0093197	-0.00137175	-0.0123564	0.00579242	-0.0233438	0.0120023	0.019593	0.00481456	0.00534688
0.2	0.00768366	-0.00037431	-0.0127442	0.00594633	-0.0208739	0.0124127	0.0200939	0.00451315	0.00642209
0.201	0.0268864	0.000862271	-0.0130373	0.00649679	-0.0183422	0.0130995	0.0210295	0.00411383	0.00765292
0.202	0.045089	0.00225368	-0.0132298	0.00741753	-0.015878	0.0140799	0.0222694	0.00367637	0.00873409
0.203	0.0596149	0.00361331	-0.0134975	0.00858636	-0.0137275	0.0152085	0.0237191	0.00332906	0.0093838
0.204	0.0687927	0.00477401	-0.0139176	0.00991835	-0.0121511	0.0163544	0.0252735	0.00313977	0.009414
0.205	0.072064	0.00561722	-0.014235	0.0113635	-0.0111431	0.0175223	0.0267603	0.00313138	0.00880004
0.206	0.0698557	0.00598865	-0.0140658	0.0128943	-0.0105586	0.0187846	0.0280179	0.0033251	0.00770371
0.207	0.0632328	0.00581317	-0.0132198	0.0144233	-0.0103545	0.020182	0.0289033	0.00367835	0.00631262
0.208	0.0534218	0.00518768	-0.0118174	0.0156695	-0.0104835	0.0216928	0.0293402	0.00410923	0.00485765
0.209	0.0415186	0.00430536	-0.0101926	0.0163078	-0.0107655	0.0231704	0.0293866	0.00456108	0.00367014
0.21	0.0285829	0.00335731	-0.00871638	0.0162288	-0.0110738	0.0243889	0.0292022	0.00500524	0.00305079
0.211	0.0157322	0.00253141	-0.007604	0.0155282	-0.0114373	0.0251866	0.0290147	0.00538396	0.00313428
0.212	0.00402466	0.00205587	-0.00683595	0.0143384	-0.0117301	0.025501	0.0289793	0.00557424	0.00386238
0.213	-0.00572993	0.00216728	-0.00632895	0.0127939	-0.0115739	0.0252681	0.0290151	0.00547256	0.00511878
0.214	-0.0131194	0.00302798	-0.00607064	0.0110869	-0.0107137	0.0243485	0.0288876	0.00502863	0.00677081
0.215	-0.0181052	0.00461814	-0.00610813	0.0094252	-0.0092466	0.0226931	0.0284416	0.00422781	0.00862669
0.216	-0.0208863	0.00672189	-0.00648482	0.00803697	-0.007462	0.0205095	0.0276849	0.00319174	0.0105139
0.217	-0.0217901	0.00900296	-0.0071509	0.00719386	-0.00559805	0.0180927	0.0267436	0.00217382	0.0122409
0.218	-0.0212414	0.0110838	-0.00806601	0.0069976	-0.00379846	0.0156761	0.0258128	0.00133369	0.0135545
0.219	-0.0196785	0.012698	-0.0092979	0.0072683	-0.00213212	0.0135247	0.0250166	0.000659535	0.0143194
0.22	-0.0174483	0.0137735	-0.0108261	0.00780408	-0.000648978	0.0118786	0.0243511	9.39932e-05	0.0145641
0.221	-0.0148773	0.0142792	-0.0123761	0.00851217	0.000522388	0.0107582	0.0238046	-0.000346974	0.0143202
0.222	-0.0123295	0.0140788	-0.013582	0.00928137	0.00130628	0.0100037	0.0234156	-0.000458373	0.0136133
0.223	-0.0101136	0.0130742	-0.0142786	0.0099711	0.00182941	0.00947997	0.0232292	8.17852e-05	0.0125876
0.224	-0.00836728	0.0113523	-0.0145635	0.0104459	0.0023188	0.0091367	0.0232466	0.00143678	0.0114491
0.225	-0.00705615	0.00911429	-0.0146444	0.0105445	0.00289216	0.00883106	0.023444	0.0035227	0.0103382
0.226	-0.0061188	0.00654452	-0.0146799	0.0102112	0.00342874	0.00821586	0.0238169	0.00616276	0.00934408
0.227	-0.00557146	0.00370499	-0.0147151	0.00968155	0.00376819	0.00696665	0.0243013	0.00918979	0.00858066
0.228	-0.00545304	0.000601665	-0.0147807	0.00928956	0.00402111	0.00504372	0.0247516	0.0124442	0.00829449
0.229	-0.00569962	-0.00260306	-0.014965	0.0091702	0.00441833	0.00265731	0.0250773	0.0158345	0.00881753
0.23	-0.00613737	-0.00553544	-0.015302	0.00933179	0.00502443	0.000122012	0.0252949	0.0193372	0.0102606
0.231	-0.00661941	-0.00784349	-0.0156708	0.0097076	0.00582789	-0.00225685	0.0254263	0.0228211	0.0123775
0.232	-0.00704676	-0.0094075	-0.0158832	0.0100916	0.00683643	-0.00428645	0.02537	0.0259758	0.0148308
0.233	-0.00730882	-0.0103238	-0.0158222	0.0103642	0.00798096	-0.00588268	0.0249618	0.0284632	0.0174422
0.234	-0.00732235	-0.0108241	-0.0154232	0.0107067	0.00908386	-0.00701111	0.0241789	0.0300989	0.0201014
0.235	-0.00696917	-0.0111871	-0.0146585	0.0113681	0.00998268	-0.00758323	0.0232326	0.0308876	0.0225782
0.236	-0.00604462	-0.0116227	-0.0135953	0.0123708	0.0106272	-0.00745863	0.0224825	0.0309312	0.0245623
0.237	-0.00447184	-0.0121821	-0.0123046	0.0135468	0.0109804	-0.00668522	0.0222439	0.0303058	0.0258424
0.238	-0.00241127	-0.0128298	-0.0108442	0.0147044	0.0109431	-0.00551203	0.0226394	0.0290054	0.0263825
0.239	-9.13777e-05	-0.0135678	-0.00945297	0.0157097	0.0104308	-0.00408253	0.0235326	0.0270813	0.0262728
0.24	0.00231817	-0.014464	-0.00848032	0.0164667	0.00942681	-0.00239672	0.0246119	0.0247744	0.0256809
0.241	0.00462221	-0.0156195	-0.00807829	0.0169106	0.00802261	-0.000591024	0.025628	0.0223882	0.0247231
0.242	0.00651894	-0.017041	-0.00816417	0.0169872	0.00649379	0.000997188	0.0264885	0.0200542	0.0233407
0.243	0.00778118	-0.0186191	-0.00860774	0.0166488	0.00520536	0.00198152	0.0270975	0.0176642	0.0214773
0.244	0.00837015	-0.0201824	-0.00934029	0.0159378	0.00441546	0.00208205	0.0272834	0.0151127	0.0192702
0.245	0.00827954	-0.02148	-0.0102915	0.0149616	0.00421256	0.00132202	0.0270074	0.0124654	0.0169599
0.246	0.00752587	-0.0222917	-0.0113354	0.0138174	0.00450285	-7.13737e-05	0.0264655	0.00978321	0.0147013
0.247	0.00629861	-0.0224955	-0.0123906	0.0126098	0.00507459	-0.00191123	0.0259136	0.00706231	0.0124893
0.248	0.00490164	-0.0220002	-0.0133766	0.0115123	0.00578239	-0.00393989	0.0255316	0.00428393	0.0102517
0.249	0.00364422	-0.0207596	-0.0141558	0.0107605	0.00659536	-0.00583333	0.0254011	0.00141428	0.00800183
0.25	0.00283784	-0.018764	-0.0147276	0.0105432	0.00745667	-0.00741191	0.0255274	-0.00144147	0.00584845
0.251	0.00260615	-0.0160933	-0.0151803	0.0109859	0.00822467	-0.00864867	0.0258423	-0.00407443	0.00389382
0.252	0.00282468	-0.0130799	-0.0154629	0.0121707	0.00875598	-0.00963159	0.0262624	-0.00637196	0.00221456
0.253	0.00343162	-0.0102489	-0.0154687	0.0140102	0.00890531	-0.0105001	0.0268076	-0.00826608	0.000838484
0.254	0.00444948	-0.00807248	-0.0152078	0.0161902	0.00856213	-0.011309	0.0275258	-0.00976061	-0.000269194
0.255	0.0056931	-0.00678976	-0.0148123	0.0182957	0.00777891	-0.0119289	0.0283948	-0.0109506	-0.00122978
0.256	0.00675734	-0.00632653	-0.0143835	0.0200119	0.00666843	-0.0120437	0.029322	-0.0117747	-0.00225675
0.257	0.00726734	-0.00640327	-0.0138532	0.0212725	0.00532363	-0.0113845	0.0301474	-0.012053	-0.00347154
0.258	0.00713087	-0.00680409	-0.0130745	0.0221594	0.00390102	-0.0100053	0.0307509	-0.0117498	-0.00484837
0.259	0.00654421	-0.00743497	-0.0120502	0.0226609	0.00250891	-0.00822641	0.0311363	-0.0110052	-0.00632714
0.26	0.00572671	-0.00820394	-0.0109827	0.0226524	0.00114078	-0.00642406	0.0313519	-0.0101365	-0.00783153
0.261	0.00484883	-0.0090404	-0.0100953	0.0220334	-0.000148822	-0.00495049	0.0313858	-0.00951963	-0.00923092
0.262	0.00404824	-0.00993736	-0.00951762	0.0208245	-0.00112694	-0.00409006	0.0312629	-0.00931617	-0.0103341
0.263	0.00329924	-0.0108622	-0.0092979	0.0192147	-0.00149324	-0.00395349	0.0311312	-0.00953538	-0.0110168
0.264	0.00250997	-0.0116541	-0.0093853	0.0173736	-0.00116191	-0.0044647	0.0311067	-0.0101644	-0.011372
0.265	0.00165897	-0.0120573	-0.00966507	0.0153657	-0.000358847	-0.00547664	0.031197	-0.0110639	-0.011614
0.266	0.000737028	-0.0119049	-0.0100363	0.0134198	0.00063232	-0.00680534	0.0313919	-0.0120357	-0.0118373
0.267	-0.000226129	-0.0112419	-0.0103728	0.0119567	0.00169726	-0.00819081	0.0316639	-0.0129351	-0.012008
0.268	-0.00113141	-0.0102355	-0.0105341	0.0113092	0.00276636	-0.00935155	0.0319261	-0.0136145	-0.0121483
0.269	-0.00197199	-0.00904432	-0.0104393	0.0115745	0.00363692	-0.0100488	0.0320723	-0.0138915	-0.0123299
0.27	-0.00291068	-0.00776834	-0.010064	0.0127081	0.00409321	-0.010058	0.0319585	-0.0135911	-0.0125147
0.271	-0.00407296	-0.00645379	-0.00944871	0.0145949	0.00402878	-0.00921174	0.0314165	-0.0126865	-0.0125927
0.272	-0.00544268	-0.00510922	-0.00873202	0.0169581	0.00340331	-0.00752269	0.0304086	-0.0112993	-0.0124849
0.273	-0.00693305	-0.0037006	-0.00804371	0.0194317	0.00224853	-0.00519098	0.0290268	-0.00951005	-0.0120806
0.274	-0.00834371	-0.00218831	-0.00736896	0.02176	0.000705315	-0.00240472	0.0272955	-0.0073428	-0.0112745
0.275	-0.00932823	-0.000493268	-0.0066768	0.0238018	-0.00101157	0.000743058	0.0250637	-0.0049116	-0.0100722
0.276	-0.00953384	0.00164699	-0.0060356	0.0253923	-0.00263233	0.00403315	0.0221193	-0.00242446	-0.00853574
0.277	-0.00879554	0.00459477	-0.00551188	0.0262977	-0.0038817	0.00724237	0.0183845	5.50615e-06	-0.00673094
0.278	-0.00722894	0.00856502	-0.00512997	0.0263174	-0.00461219	0.0104728	0.0138524	0.00234703	-0.00471538
0.279	-0.00514693	0.0136379	-0.0048704	0.0254562	-0.00480569	0.0139778	0.00845477	0.00445616	-0.00249885
0.28	-0.00288542	0.0199185	-0.00462741	0.023992	-0.00448723	0.0179032	0.00221264	0.00617599	-0.000146602
0.281	-0.000721918	0.0275271	-0.00422629	0.0222949	-0.00368378	0.0223008	-0.00477779	0.00745777	0.00212307
0.282	0.00113681	0.0365343	-0.00344962	0.0206695	-0.00237183	0.0272134	-0.0125606	0.00824581	0.0041156
0.283	0.00258981	0.0468865	-0.00205097	0.0193908	-0.000482756	0.0328165	-0.0212263	0.00850709	0.00584046
0.284	0.00369668	0.0583077	0.000139576	0.0187505	0.00197219	0.0394345	-0.0308503	0.00841819	0.00746492
0.285	0.00470211	0.070467	0.00311028	0.0188917	0.00485014	0.0472453	-0.0417111	0.0082922	0.00911664
0.286	0.00598881	0.0831987	0.0067584	0.01959	0.00799194	0.0561603	-0.0543101	0.00828143	0.0106923
0.287	0.00789572	0.0963964	0.0110675	0.0204905	0.0112414	0.0660465	-0.0691924	0.00827446	0.0119372
0.288	0.0105308	0.109897	0.0161685	0.021482	0.0144589	0.0767609	-0.0869037	0.00809348	0.0127241
0.289	0.0139324	0.123485	0.0222714	0.0225881	0.0176769	0.0880519	-0.108057	0.00773061	0.013073
0.29	0.0182676	0.13697	0.0295587	0.0236954	0.0211077	0.0995237	-0.13345	0.00729952	0.0130568
0.291	0.0236829	0.150284	0.0381015	0.0245368	0.0249738	0.110724	-0.164255	0.00686141	0.0129557
0.292	0.0301885	0.163357	0.0477918	0.0248203	0.0294482	0.121294	-0.202181	0.00634918	0.0132501
0.293	0.0377466	0.175918	0.0584588	0.0242857	0.0347809	0.130804	-0.249582	0.00551271	0.0143238
0.294	0.0463966	0.187351	0.0701309	0.0228323	0.0412825	0.138604	-0.309564	0.00399032	0.016266
0.295	0.05624	0.196661	0.0830301	0.0207118	0.0490871	0.144008	-0.385792	0.00139981	0.0188583
0.296	0.0672482	0.202734	0.0972827	0.0183891	0.058068	0.146283	-0.481727	-0.00261261	0.0217301
0.297	0.0792338	0.204585	0.11272	0.0162665	0.067961	0.144563	-0.599603	-0.00829383	0.0245281
0.298	0.0920123	0.201386	0.1289	0.0145805	0.0784209	0.138168	-0.739474	-0.0158247	0.0269059
0.299	0.105477	0.192736	0.145317	0.0133594	0.0891332	0.12691	-0.898613	-0.0252578	0.0284519
0.3	0.119578	0.179194	0.161675	0.0125028	0.0999734	0.1111	-1.07155	-0.0363306	0.0286874
0.301	0.134239	0.162676	0.177801	0.0119944	0.110821	0.0914498	-1.2507	-0.0484922	0.0271559
0.302	0.149371	0.146519	0.193301	0.0119271	0.121354	0.0691323	-1.42741	-0.0611646	0.0236741
0.303	0.165037	0.135131	0.20756	0.0122554	0.131136	0.0459741	-1.59324	-0.0739915	0.0186063
0.304	0.181668	0.133371	0.219808	0.0126764	0.139647	0.0244355	-1.74123	-0.086801	0.0128467
0.305	0.200199	0.145683	0.229024	0.0127481	0.146277	0.00735455	-1.86683	-0.0994656	0.00753731
0.306	0.221993	0.17515	0.233981	0.0119892	0.150297	-0.00232053	-1.96847	-0.111891	0.00379867
0.307	0.248744	0.223011	0.233347	0.00993711	0.150774	-0.0018123	-2.04738	-0.124036	0.00243786
0.308	0.282421	0.288679	0.225928	0.00615408	0.146604	0.0111953	-2.1068	-0.135913	0.00371723
0.309	0.324985	0.370038	0.211196	0.000144858	0.136776	0.0383887	-2.15115	-0.147476	0.00755695
0.31	0.377766	0.46369	0.189836	-0.00872693	0.120731	0.0807143	-2.18558	-0.158515	0.0138127
0.311	0.440827	0.564662	0.164125	-0.0212311	0.0986389	0.138291	-2.21518	-0.168773	0.022225
0.312	0.5128	0.666091	0.138011	-0.0381274	0.0715217	0.210151	-2.24412	-0.178042	0.0325096
0.313	0.591314	0.75987	0.116759	-0.0600955	0.0411209	0.293379	-2.27551	-0.186046	0.0446043
0.314	0.673768	0.838479	0.106275	-0.0877512	0.00979528	0.382528	-2.31177	-0.192499	0.0586013
0.315	0.75807	0.897421	0.11214	-0.121458	-0.0193967	0.470984	-2.35471	-0.197176	0.0744375
0.316	0.842889	0.936857	0.138525	-0.160794	-0.0427511	0.553996	-2.40533	-0.199675	0.0915642
0.317	0.927395	0.961099	0.187407	-0.204042	-0.0562461	0.630833	-2.46339	-0.199342	0.108864
0.318	1.01083	0.976012	0.258267	-0.248259	-0.0561843	0.704118	-2.52709	-0.19554	0.125021
0.319	1.09222	0.985993	0.348354	-0.289712	-0.0400643	0.776641	-2.59268	-0.187849	0.138968
0.32	1.17056	0.992939	0.45348	-0.324463	-0.00721422	0.847665	-2.65441	-0.176125	0.150064
0.321	1.24524	0.997466	0.5686	-0.349286	0.0409399	0.911174	-2.70477	-0.160439	0.158158
0.322	1.31648	1.00018	0.687433	-0.363012	0.100925	0.957495	-2.73498	-0.140796	0.163621
0.323	1.38587	1.00162	0.801858	-0.36817	0.167609	0.977326	-2.73547	-0.116798	0.167234
0.324	1.45634	1.00187	0.902403	-0.370938	0.235125	0.965807	-2.69635	-0.0875574	0.169989
0.325	1.53102	1.00101	0.980376	-0.377916	0.298633	0.924578	-2.60849	-0.0518048	0.17308
0.326	1.61134	1.00041	1.03063	-0.39234	0.356188	0.861466	-2.46582	-0.00790514	0.178095
0.327	1.69602	1.00345	1.05271	-0.413129	0.409711	0.789007	-2.26772	0.0462552	0.187166
0.328	1.78223	1.01543	1.0496	-0.436423	0.464897	0.72269	-2.01966	0.113179	0.202983
0.329	1.86787	1.04201	1.02605	-0.457311	0.529544	0.679324	-1.73203	0.195028	0.228825
0.33	1.95309	1.08647	0.988023	-0.470806	0.610019	0.675216	-1.39526	0.292425	0.268599
0.331	2.03953	1.14692	0.942976	-0.47216	0.707276	0.722892	-0.944742	0.403688	0.326157
0.332	2.12826	1.21568	0.89895	-0.456473	0.814478	0.826716	-0.296361	0.524839	0.403718
0.333	2.21805	1.2813	0.862339	-0.418625	0.917624	0.980454	0.572036	0.65006	0.500399
0.334	2.30559	1.33167	0.836027	-0.3543	0.99944	1.16863	1.59499	0.772319	0.611689
0.335	2.38661	1.35658	0.819375	-0.260907	1.04495	1.37039	2.64775	0.883859	0.729935
0.336	2.45678	1.34935	0.809639	-0.137508	1.04637	1.56366	3.58762	0.976587	0.845692
0.337	2.51242	1.30701	0.804081	0.0148501	1.00534	1.72849	4.29482	1.04261	0.949307
0.338	2.55153	1.22946	0.802651	0.191259	0.932115	1.84915	4.70103	1.07476	1.03202
0.339	2.57485	1.11817	0.809441	0.381629	0.843006	1.91466	4.79469	1.06687	1.08643
0.34	2.58604	0.975158	0.830372	0.57271	0.757364	1.9182	4.60696	1.01411	1.10679
0.341	2.59186	0.802334	0.868384	0.752378	0.695092	1.85628	4.19343	0.913683	1.08917
0.342	2.60204	0.601284	0.920506	0.913322	0.674875	1.72816	3.61967	0.765725	1.03137
0.343	2.62725	0.37365	0.978455	1.05497	0.711534	1.53525	2.95121	0.573846	0.932723
0.344	2.67515	0.122013	1.03112	1.18415	0.81157	1.28116	2.24706	0.34519	0.794064
0.345	2.7471	-0.148987	1.0673	1.31471	0.969862	0.972151	1.55619	0.0903207	0.618016
0.346	2.83737	-0.431706	1.07786	1.46556	1.17074	0.61777	0.916157	-0.177445	0.40938
0.347	2.93498	-0.715238	1.05698	1.65641	1.39229	0.231437	0.353087	-0.443407	0.175565
0.348	3.02663	-0.986241	1.00201	1.90146	1.61104	-0.169616	-0.117347	-0.693164	-0.0733843
0.349	3.09956	-1.23041	0.912483	2.20379	1.8054	-0.565559	-0.488163	-0.914112	-0.325599
0.35	3.14377	-1.43426	0.789076	2.5537	1.9579	-0.936196	-0.759339	-1.09649	-0.568782
0.351	3.15296	-1.58724	0.632812	2.93123	2.05593	-1.26349	-0.936287	-1.23384	-0.791347
0.352	3.1239	-1.68334	0.444745	3.31071	2.09152	-1.53339	-1.02848	-1.3232	-0.983248
0.353	3.05516	-1.72158	0.226287	3.66522	2.06048	-1.73677	-1.04819	-1.36505	-1.13674
0.354	2.94617	-1.70558	-0.0200031	3.96968	1.96158	-1.86985	-1.00944	-1.36287	-1.24702
0.355	2.79668	-1.64269	-0.289467	4.20332	1.79607	-1.93398	-0.926954	-1.32237	-1.31261
0.356	2.60688	-1.54276	-0.574471	4.3509	1.5673	-1.9347	-0.815124	-1.25072	-1.3351
0.357	2.37804	-1.41685	-0.864117	4.40219	1.28096	-1.88066	-0.687201	-1.15583	-1.31848
0.358	2.11346	-1.27588	-1.14489	4.35183	0.945552	-1.7826	-0.554689	-1.04554	-1.26848
0.359	1.81895	-1.12956	-1.40219	4.19967	0.572758	-1.65225	-0.426773	-0.927135	-1.19192
0.36	1.50281	-0.985768	-1.62221	3.95044	0.177539	-1.50114	-0.310083	-0.806849	-1.09618
0.361	1.17563	-0.850311	-1.79374	3.6134	-0.222435	-1.33964	-0.208806	-0.68966	-0.988539
0.362	0.849701	-0.727083	-1.90925	3.20236	-0.608249	-1.17652	-0.124903	-0.579481	-0.875535
0.363	0.538259	-0.618245	-1.9656	2.73555	-0.961681	-1.01874	-0.0583287	-0.479326	-0.762687
0.364	0.254361	-0.524404	-1.96414	2.23511	-1.26706	-0.87143	-0.00726687	-0.391059	-0.654561
0.365	0.00958963	-0.445013	-1.91015	1.72598	-1.51271	-0.738085	0.0314816	-0.315309	-0.554556
0.366	-0.187186	-0.378847	-1.81183	1.23379	-1.6917	-0.620734	0.061809	-0.251769	-0.464605
0.367	-0.330411	-0.324289	-1.67923	0.782281	-1.80199	-0.519896	0.0875365	-0.199573	-0.385516
0.368	-0.418086	-0.279405	-1.52313	0.390914	-1.84602	-0.43491	0.112009	-0.157516	-0.317541
0.369	-0.451987	-0.242033	-1.35416	0.0731282	-1.83002	-0.364463	0.138009	-0.124118	-0.260483
0.37	-0.437346	-0.210224	-1.18193	-0.164289	-1.76315	-0.30681	0.167398	-0.0977235	-0.213549
0.371	-0.381827	-0.182527	-1.01445	-0.320396	-1.65635	-0.259954	0.200599	-0.0767237	-0.175443
0.372	-0.294505	-0.157842	-0.857951	-0.398648	-1.52101	-0.221933	0.236593	-0.0597531	-0.144725
0.373	-0.185103	-0.135468	-0.716809	-0.405928	-1.36807	-0.190951	0.273465	-0.0456954	-0.119951
0.374	-0.0631963	-0.115188	-0.593604	-0.352076	-1.20736	-0.165403	0.309016	-0.0336315	-0.0996854
0.375	0.0626389	-0.0969273	-0.489286	-0.249097	-1.04715	-0.143974	0.341153	-0.0229173	-0.0826926
0.376	0.185531	-0.080475	-0.403364	-0.110021	-0.894009	-0.125647	0.368133	-0.0132248	-0.0680618
0.377	0.300504	-0.0656175	-0.334371	0.0520792	-0.752714	-0.10969	0.388829	-0.0043593	-0.0551114
0.378	0.404095	-0.0522227	-0.280305	0.224821	-0.626321	-0.0957169	0.402792	0.0038547	-0.04329
0.379	0.493868	-0.0401121	-0.238823	0.396977	-0.516307	-0.0834823	0.410096	0.0114265	-0.0320574
0.38	0.56834	-0.0291103	-0.207455	0.558764	-0.422787	-0.0727134	0.411262	0.0181428	-0.0209893
0.381	0.627143	-0.0191925	-0.183819	0.702228	-0.344997	-0.0632026	0.40732	0.0238054	-0.0100798
0.382	0.670952	-0.0104627	-0.165738	0.821261	-0.281652	-0.0547978	0.39988	0.0284821	0.000379987
0.383	0.701128	-0.00309586	-0.151242	0.911397	-0.23105	-0.047335	0.390852	0.0323958	0.0101159
0.384	0.719341	0.00278703	-0.138592	0.970917	-0.1912	-0.0406878	0.381898	0.0356698	0.0188024
0.385	0.727374	0.00725919	-0.126601	1.00205	-0.160065	-0.0347594	0.374131	0.0382879	0.02604
0.386	0.727019	0.0105014	-0.11485	1.01026	-0.135844	-0.0294318	0.36799	0.0401287	0.0316733
0.387	0.720032	0.0126451	-0.103313	1.00272	-0.116963	-0.0246331	0.363306	0.0410864	0.0358862
0.388	0.70813	0.013781	-0.0919735	0.987107	-0.101965	-0.0204312	0.35955	0.0412865	0.0389846
0.389	0.693095	0.0140743	-0.0808878	0.970499	-0.089568	-0.0169941	0.355969	0.041063	0.0412727
0.39	0.676961	0.0137603	-0.0702723	0.958285	-0.0788108	-0.0144132	0.351773	0.0406929	0.0430015
0.391	0.661906	0.013094	-0.0604506	0.953479	-0.0690912	-0.0126117	0.346516	0.0402485	0.0442957
0.392	0.650044	0.0123293	-0.0517563	0.956539	-0.0600048	-0.0114226	0.340296	0.0397738	0.0451837
0.393	0.643314	0.0115622	-0.0443388	0.965932	-0.0512402	-0.0107094	0.33367	0.039396	0.0457629
0.394	0.643351	0.0107695	-0.0381964	0.979298	-0.0426806	-0.010459	0.327412	0.0390861	0.0462792
0.395	0.651289	0.0100827	-0.0334094	0.994355	-0.0344606	-0.010785	0.322191	0.0385793	0.0469673
0.396	0.667518	0.00973198	-0.030019	1.00896	-0.0268448	-0.0117624	0.318223	0.0375922	0.0478649
0.397	0.691659	0.00981755	-0.0278083	1.02088	-0.0200209	-0.0132762	0.315085	0.0361058	0.0488099
0.398	0.722721	0.0103024	-0.026543	1.02785	-0.0139742	-0.0151024	0.312101	0.0344334	0.0495514
0.399	0.759284	0.0110868	-0.0261776	1.02765	-0.00856988	-0.0169231	0.308734	0.0328276	0.0498774
0.4	0.799542	0.0120447	-0.0266192	1.0182	-0.0037822	-0.0182913	0.304603	0.0312112	0.0497236
0.401	0.841126	0.0130742	-0.027563	0.997874	0.000260116	-0.0189134	0.299623	0.0293752	0.0491793
0.402	0.88124	0.0141837	-0.0287387	0.96616	0.00349903	-0.0188449	0.294184	0.0272546	0.0483573
0.403	0.917137	0.0154446	-0.0301173	0.924039	0.00599964	-0.0182767	0.289056	0.0249949	0.04733
0.404	0.946357	0.0168451	-0.0316465	0.873758	0.00777535	-0.0173536	0.285183	0.0227961	0.0461908
0.405	0.966823	0.018276	-0.0330247	0.818246	0.00875691	-0.0162296	0.283423	0.0208408	0.0450312
0.406	0.976985	0.0195645	-0.033947	0.761081	0.00888839	-0.015106	0.284245	0.0193271	0.0438923
0.407	0.975879	0.0205413	-0.0343059	0.706939	0.0082368	-0.0141641	0.2875	0.0184248	0.0427903
0.408	0.963254	0.0210953	-0.0340971	0.661019	0.00696953	-0.0134791	0.292477	0.0182143	0.0416915
0.409	0.939726	0.0211707	-0.0333038	0.627166	0.00527695	-0.013028	0.298303	0.0185799	0.0405181
0.41	0.906643	0.0208414	-0.0319069	0.606479	0.00341228	-0.0127998	0.304159	0.0191634	0.0392955
0.411	0.865862	0.0203195	-0.0300251	0.597562	0.00156564	-0.0128301	0.309177	0.0195358	0.0381387
0.412	0.819544	0.0198595	-0.0279299	0.597888	-0.00021006	-0.013191	0.312616	0.0194404	0.0370825
0.413	0.769787	0.0195951	-0.0258766	0.604777	-0.00184398	-0.0139455	0.314145	0.0189648	0.0361121
0.414	0.718473	0.0194373	-0.0240133	0.615327	-0.00327965	-0.0149976	0.313763	0.0184062	0.0352009
0.415	0.667362	0.0192724	-0.022359	0.626181	-0.00453216	-0.0161761	0.311705	0.0178952	0.034311
0.416	0.618059	0.0191444	-0.0208525	0.63378	-0.00557933	-0.0174565	0.308397	0.0173294	0.0334402
0.417	0.57195	0.0192373	-0.0195356	0.634899	-0.00635369	-0.0188671	0.304369	0.0166084	0.032527
0.418	0.53028	0.019831	-0.0185056	0.62712	-0.00680124	-0.020251	0.300311	0.0157423	0.03147
0.419	0.494038	0.0211262	-0.0177033	0.60919	-0.00692693	-0.0212895	0.29704	0.0148166	0.0302885
0.42	0.463721	0.023024	-0.0169783	0.581201	-0.00682923	-0.0217615	0.295241	0.0139361	0.0290405
0.421	0.439311	0.025121	-0.0162864	0.5443	-0.006604	-0.0216333	0.295323	0.0131447	0.027747
0.422	0.420342	0.026965	-0.0157484	0.500159	-0.0063505	-0.0209672	0.29755	0.0124945	0.0265585
0.423	0.405981	0.0283323	-0.0154982	0.450742	-0.00627522	-0.0198695	0.302078	0.0121089	0.0257679
0.424	0.395128	0.0291993	-0.0155073	0.398485	-0.00655807	-0.0184656	0.308829	0.0120304	0.0255069
0.425	0.386577	0.0295566	-0.0156442	0.346398	-0.0072584	-0.0168814	0.317497	0.0122015	0.0255734
0.426	0.379304	0.0294335	-0.015874	0.297641	-0.00832049	-0.0152078	0.327658	0.01258	0.0256887
0.427	0.372578	0.0290501	-0.0163448	0.254731	-0.00948995	-0.0134813	0.338806	0.0130953	0.0257727
0.428	0.365869	0.0287556	-0.0171808	0.218921	-0.0104347	-0.0117244	0.350254	0.0136096	0.0258552
0.429	0.358883	0.0287971	-0.0182462	0.190172	-0.0109792	-0.0100084	0.361251	0.0140525	0.0258767
0.43	0.351625	0.0292194	-0.0192547	0.167779	-0.0111303	-0.00844987	0.371263	0.0144041	0.0257318
0.431	0.3444	0.0299665	-0.0199975	0.151103	-0.0109782	-0.00711479	0.380127	0.0145919	0.0254236
0.432	0.337588	0.0310178	-0.02043	0.139799	-0.0105782	-0.00596147	0.388072	0.0145727	0.0250382
0.433	0.33136	0.0323487	-0.0205236	0.133517	-0.00988449	-0.00484814	0.395553	0.0143739	0.0246482
0.434	0.325858	0.0338626	-0.0200737	0.131849	-0.00887652	-0.00359795	0.403079	0.0141831	0.0242907
0.435	0.321388	0.0354375	-0.0188338	0.134621	-0.00769406	-0.00213101	0.411309	0.0143138	0.0239304
0.436	0.318228	0.0369229	-0.0167746	0.142058	-0.00645135	-0.000471742	0.421153	0.0148385	0.0234871
0.437	0.316451	0.0381464	-0.0141496	0.154553	-0.00509469	0.00128771	0.43345	0.0156086	0.022958
0.438	0.315874	0.0389972	-0.0112788	0.171922	-0.00356114	0.00297755	0.448504	0.0165976	0.0223838
0.439	0.316241	0.0394507	-0.00836924	0.192948	-0.00188765	0.00444073	0.466156	0.0178495	0.0217245
0.44	0.317459	0.0394739	-0.00563714	0.216001	-0.000192176	0.00559029	0.486164	0.019305	0.0208896
0.441	0.319497	0.0389702	-0.0033366	0.240173	0.00144609	0.00646576	0.508006	0.0207827	0.0198479
0.442	0.322226	0.0379267	-0.00164969	0.266064	0.00310244	0.00720819	0.530341	0.0220602	0.0186682
0.443	0.325551	0.0365072	-0.000685063	0.295591	0.00487945	0.00783428	0.551274	0.0230201	0.0174221
0.444	0.329546	0.0349452	-0.000429231	0.330682	0.00671888	0.008247	0.569106	0.0235653	0.0161373
0.445	0.334358	0.0335238	-0.000652486	0.371772	0.00854235	0.00843237	0.582538	0.023536	0.0149191
0.446	0.340127	0.0325331	-0.000985626	0.41733	0.010508	0.00847209	0.59057	0.0229288	0.0139018
0.447	0.347043	0.0320556	-0.00113952	0.464457	0.012783	0.00842094	0.592691	0.0219669	0.0131017
0.448	0.355327	0.0320069	-0.00102893	0.509653	0.01524	0.00822181	0.589092	0.0208873	0.0124613
0.449	0.365208	0.0323443	-0.000657774	0.549197	0.0177074	0.00780982	0.580671	0.019794	0.0118992
0.45	0.376857	0.0330482	9.34348e-06	0.579503	0.0201463	0.00723298	0.568832	0.0187623	0.0113004
0.451	0.390145	0.0340792	0.000943287	0.597797	0.0225238	0.00662259	0.554989	0.0179364	0.0105675
0.452	0.404527	0.0353449	0.00200078	0.60267	0.0248125	0.00610042	0.540097	0.0172812	0.00963559
0.453	0.419206	0.0366684	0.00309395	0.594263	0.0269455	0.0056724	0.52454	0.0164894	0.00841885
0.454	0.433307	0.0379284	0.00420498	0.574236	0.0288369	0.00528722	0.508222	0.0153717	0.00680904
0.455	0.445974	0.0391651	0.00531465	0.545486	0.0305364	0.00496874	0.490749	0.014041	0.00479088
0.456	0.45655	0.040463	0.00638723	0.511657	0.0321385	0.00479082	0.471745	0.0127796	0.00256514
0.457	0.464658	0.0418177	0.00728411	0.476391	0.0336212	0.00485546	0.45115	0.0119163	0.000502829
0.458	0.470035	0.0431139	0.00782369	0.442665	0.0348992	0.00517905	0.429389	0.0116477	-0.001051
0.459	0.472494	0.0441352	0.00794869	0.412459	0.0359584	0.00560977	0.407346	0.011927	-0.00197482
0.46	0.472094	0.0446949	0.00775913	0.386576	0.036881	0.00606084	0.386059	0.0125124	-0.00235238
0.461	0.469124	0.0447982	0.00743258	0.365211	0.0377596	0.00659476	0.366481	0.0131243	-0.00226359
0.462	0.463918	0.0446179	0.00711171	0.349043	0.0386548	0.00728399	0.349409	0.0136776	-0.00174205
0.463	0.456893	0.0443658	0.00683479	0.339271	0.0395463	0.0081634	0.335658	0.0143028	-0.000905587
0.464	0.448836	0.0441738	0.00653038	0.336751	0.0403292	0.00917598	0.326229	0.015108	2.15631e-05
0.465	0.441018	0.044079	0.00609001	0.341521	0.0409888	0.0101835	0.322034	0.0160339	0.000838375
0.466	0.435122	0.044116	0.00551402	0.352755	0.0416511	0.0110159	0.323522	0.0168969	0.00150767
0.467	0.433331	0.044351	0.0049487	0.36876	0.0423788	0.0114541	0.3305	0.0174953	0.00211002
0.468	0.438378	0.0448388	0.00457956	0.38709	0.0430687	0.0113507	0.342039	0.0176624	0.00265751
0.469	0.452977	0.0455449	0.00461293	0.40484	0.0436255	0.0107616	0.356627	0.0172567	0.00301098
0.47	0.478937	0.0463273	0.00525497	0.419065	0.0439886	0.00992501	0.372488	0.016249	0.00296295
0.471	0.516631	0.0470194	0.00653688	0.427303	0.0439775	0.00908323	0.387762	0.0148315	0.00243612
0.472	0.565097	0.0474697	0.00823746	0.428089	0.0434877	0.00831888	0.400624	0.013346	0.0015104
0.473	0.622718	0.0475753	0.0100767	0.421034	0.0427278	0.0076389	0.409496	0.0120882	0.000325721
0.474	0.687919	0.0473735	0.0119255	0.406517	0.0420178	0.00703664	0.413297	0.0111622	-0.0008925
0.475	0.759187	0.0470484	0.013682	0.385563	0.0415452	0.00649355	0.411568	0.0105114	-0.0019694
0.476	0.834665	0.0467924	0.0151014	0.359704	0.0413924	0.00603025	0.404517	0.0100985	-0.00291677
0.477	0.912209	0.0467005	0.0159922	0.330548	0.0416264	0.00571676	0.39297	0.00997732	-0.0037364
0.478	0.989647	0.0468479	0.0162991	0.299608	0.0422252	0.00570664	0.378108	0.0102616	-0.00428714
0.479	1.06468	0.0473864	0.0159686	0.268503	0.0430035	0.00616278	0.361187	0.0110688	-0.00444721
0.48	1.13469	0.048424	0.0151321	0.238902	0.0437612	0.0070615	0.343476	0.0123687	-0.00417124
0.481	1.19671	0.0499526	0.0141686	0.212153	0.0444325	0.0081251	0.326148	0.0139303	-0.00339688
0.482	1.24758	0.0519364	0.0133269	0.189138	0.0450856	0.00891156	0.310023	0.0154228	-0.0021133
0.483	1.28432	0.0541826	0.0126461	0.170401	0.0458768	0.0091162	0.295554	0.0165191	-0.000483325
0.484	1.30478	0.0563203	0.0122705	0.156159	0.0469375	0.00889797	0.283003	0.0169553	0.00118534
0.485	1.30815	0.0581281	0.0124513	0.146249	0.0482063	0.00869149	0.272578	0.0166438	0.00258168
0.486	1.29484	0.0596238	0.0132649	0.140221	0.0493939	0.0087349	0.264517	0.0157605	0.00346701
0.487	1.26615	0.0608059	0.0145631	0.137432	0.0501967	0.00905009	0.259058	0.0145741	0.00369253
0.488	1.22401	0.0615737	0.0161124	0.137245	0.0504902	0.00964535	0.2565	0.0133292	0.00331817
0.489	1.17092	0.0619084	0.0177225	0.139253	0.0502922	0.010444	0.257393	0.0123624	0.00260934
0.49	1.10987	0.061913	0.0192541	0.143103	0.0496569	0.0112707	0.26236	0.0120078	0.00173925
0.491	1.04407	0.0617127	0.0205711	0.148369	0.0486023	0.0120278	0.271733	0.0123612	0.000727515
0.492	0.976705	0.0613843	0.021618	0.154811	0.0471521	0.0127324	0.285412	0.0133001	-0.000295351
0.493	0.910863	0.0609601	0.0224365	0.162456	0.0454689	0.01344	0.302765	0.0146287	-0.00107592
0.494	0.849285	0.0605172	0.023031	0.171285	0.0438536	0.0141964	0.322601	0.0161932	-0.00140899
0.495	0.79393	0.0601757	0.0233391	0.181111	0.0425941	0.0149909	0.343338	0.0178986	-0.00118259
0.496	0.745926	0.0600086	0.0233738	0.191765	0.0418694	0.0157536	0.363398	0.0196473	-0.000362435
0.497	0.705742	0.0600203	0.0233072	0.203067	0.0417894	0.0163968	0.381598	0.0213591	0.000985445
0.498	0.673379	0.0601814	0.023394	0.214637	0.042383	0.0168236	0.397195	0.023016	0.00268661
0.499	0.648436	0.0604377	0.0238501	0.225975	0.0435425	0.0169462	0.4099	0.0246104	0.00450209
0.5	0.630056	0.0607377	0.0248114	0.236523	0.0450707	0.0167488	0.419832	0.0261135	0.00610696
0.501	0.617181	0.0611336	0.026367	0.245696	0.0467292	0.0163775	0.427289	0.0275059	0.00715702
0.502	0.608883	0.0617492	0.0285217	0.253089	0.0483022	0.0161306	0.432633	0.0288042	0.00751592
0.503	0.604278	0.0626065	0.031096	0.258553	0.0496351	0.0162371	0.436267	0.0300331	0.0072513
0.504	0.602422	0.0635945	0.0337486	0.262064	0.0505547	0.016702	0.438473	0.0311275	0.0064672
0.505	0.60235	0.0645251	0.0361486	0.263694	0.0508963	0.0174062	0.439262	0.0319974	0.00528133
0.506	0.60313	0.0652032	0.0381423	0.263465	0.0506384	0.0182195	0.438366	0.0327049	0.00388967
0.507	0.604092	0.0655357	0.0397565	0.261088	0.0498787	0.0190683	0.435385	0.0333881	0.00254141
0.508	0.605104	0.0655528	0.0410005	0.256609	0.0487468	0.0198928	0.429982	0.0341559	0.00140932
0.509	0.606646	0.0653679	0.041749	0.251292	0.0473625	0.0204755	0.422059	0.0351146	0.000611974
0.51	0.609486	0.0651135	0.0419035	0.246915	0.045778	0.0206016	0.411816	0.0362876	0.000237524
0.511	0.61422	0.0648755	0.0415768	0.244468	0.0439998	0.0203374	0.399732	0.0375832	0.000214394
0.512	0.621062	0.0646548	0.0410084	0.243904	0.0421062	0.0198984	0.386603	0.0388471	0.00040599
0.513	0.62984	0.0643807	0.0403233	0.24448	0.0403164	0.0194002	0.373474	0.0398169	0.000783784
0.514	0.640184	0.0640147	0.0395128	0.24517	0.0388743	0.0188054	0.361397	0.0402115	0.00135412
0.515	0.651746	0.0635014	0.038619	0.245261	0.0378888	0.0180472	0.351241	0.0400052	0.0020369
0.516	0.664053	0.0627474	0.0377773	0.244588	0.0373496	0.0171702	0.343672	0.0394434	0.00269942
0.517	0.676324	0.0619005	0.0370872	0.243194	0.0372294	0.0163121	0.339321	0.0387399	0.00331755
0.518	0.687582	0.0613226	0.0365786	0.241205	0.0375265	0.0155782	0.338914	0.0379553	0.00398453
0.519	0.696803	0.0612313	0.0363804	0.23898	0.0381842	0.0150322	0.343061	0.0371325	0.00467993
0.52	0.703059	0.0616494	0.0366642	0.237045	0.0390199	0.0147249	0.351729	0.0363221	0.00525849
0.521	0.705833	0.0625035	0.0373057	0.235941	0.0397933	0.0146546	0.363961	0.0355277	0.0057523
0.522	0.705188	0.0636128	0.0379284	0.235987	0.0402933	0.0148233	0.378126	0.0347637	0.00634827
0.523	0.701545	0.0647217	0.0382904	0.237093	0.0403847	0.0152512	0.392398	0.0341511	0.00708132
0.524	0.695485	0.0655465	0.0384043	0.238895	0.0401076	0.0159044	0.405058	0.0338255	0.00783489
0.525	0.687773	0.0657818	0.0383039	0.240868	0.0397021	0.0167745	0.414734	0.0336878	0.00851563
0.526	0.67921	0.0652138	0.037887	0.242381	0.0394147	0.017926	0.420745	0.0334932	0.00913438
0.527	0.67051	0.0638168	0.0370851	0.242978	0.0394486	0.0193505	0.423217	0.03319	0.00981273
0.528	0.662331	0.0617177	0.0360208	0.242519	0.0400194	0.020926	0.422878	0.0328833	0.0106397
0.529	0.655178	0.0592047	0.0349229	0.241027	0.0411374	0.0224898	0.420691	0.0325774	0.0115088
0.53	0.649308	0.0566413	0.0339392	0.23872	0.0425241	0.0238396	0.417415	0.0320934	0.0122491
0.531	0.64473	0.0542872	0.0330453	0.236095	0.0438705	0.0246769	0.41353	0.0311902	0.0128548
0.532	0.641096	0.052292	0.0321664	0.233795	0.0450566	0.0246896	0.409483	0.0297766	0.013408
0.533	0.637798	0.0507444	0.0313513	0.232367	0.0460827	0.0238888	0.405801	0.0279608	0.0138949
0.534	0.634287	0.049656	0.0307619	0.232096	0.0468435	0.0226415	0.402931	0.0259228	0.0142212
0.535	0.630177	0.048989	0.0305303	0.233019	0.0471903	0.0212354	0.401089	0.0238575	0.0143061
0.536	0.625109	0.0487225	0.0306173	0.234901	0.0470917	0.0197154	0.400199	0.0219498	0.0141744
0.537	0.618676	0.0488123	0.0307801	0.237259	0.0465268	0.0181153	0.399891	0.0202582	0.0139194
0.538	0.610475	0.0490889	0.0307831	0.239681	0.0454461	0.0165896	0.399609	0.0186838	0.0135395
0.539	0.600233	0.0493197	0.0306185	0.242043	0.0438994	0.0152458	0.398697	0.0171429	0.0129929
0.54	0.58787	0.0494296	0.030408	0.244306	0.0420745	0.0140555	0.39649	0.0157846	0.012326
0.541	0.573392	0.0495256	0.0302166	0.246348	0.0401844	0.0130252	0.392518	0.0149203	0.0116059
0.542	0.556906	0.0496715	0.0300623	0.24796	0.0383545	0.0122051	0.386607	0.0147025	0.0109257
0.543	0.538866	0.0498062	0.0299419	0.248867	0.0366416	0.0115865	0.378745	0.0150157	0.010419
0.544	0.520099	0.0498181	0.029819	0.248761	0.0350848	0.0111486	0.369032	0.0156237	0.0101601
0.545	0.501521	0.0496567	0.0296366	0.247318	0.0337646	0.0108917	0.357696	0.0162212	0.0101389
0.546	0.483963	0.0494219	0.0293066	0.244301	0.0328184	0.0107977	0.345093	0.0165377	0.0102631
0.547	0.46814	0.0492449	0.0287763	0.23979	0.0323203	0.0107594	0.331705	0.016526	0.010465
0.548	0.454609	0.0491588	0.0280793	0.234274	0.0322056	0.0106064	0.317969	0.0162166	0.0108112
0.549	0.443677	0.0491781	0.0272904	0.228511	0.0323169	0.0103112	0.304206	0.0155882	0.0113211
0.55	0.435405	0.0493772	0.0265282	0.223306	0.0324453	0.0100512	0.29081	0.0146649	0.0118196
0.551	0.429824	0.0498739	0.0259362	0.219346	0.0324077	0.00997024	0.278261	0.0134578	0.0121222
0.552	0.426956	0.0507347	0.0255742	0.217122	0.0322371	0.0100524	0.267046	0.011969	0.0121909
0.553	0.426689	0.0518113	0.0254146	0.216816	0.0321576	0.0102173	0.257738	0.0103385	0.0119799
0.554	0.428926	0.0528122	0.0254227	0.218175	0.0322741	0.0104183	0.250905	0.00880843	0.0114079
0.555	0.433632	0.0535506	0.025561	0.220719	0.0324585	0.0107244	0.246861	0.00750384	0.0106004
0.556	0.440601	0.0539752	0.0258515	0.22408	0.0325108	0.011236	0.245695	0.00637288	0.00981884
0.557	0.449227	0.054054	0.0263119	0.227887	0.0323562	0.0119079	0.247296	0.00539079	0.00914673
0.558	0.4585	0.0537926	0.0267556	0.231551	0.0320416	0.0125718	0.251347	0.00465787	0.00852225
0.559	0.467375	0.053331	0.0269166	0.234386	0.0316171	0.0129649	0.257468	0.0043069	0.00797966
0.56	0.475157	0.0528699	0.0266876	0.235798	0.0312042	0.0128089	0.265192	0.00441686	0.00767532
0.561	0.481464	0.0525414	0.0261174	0.235354	0.0309754	0.012059	0.273838	0.00500572	0.00773384
0.562	0.486064	0.0524242	0.025343	0.232908	0.0309842	0.01087	0.282575	0.00603804	0.00817126
0.563	0.488833	0.0525341	0.024538	0.228818	0.0312604	0.00933372	0.290587	0.00739651	0.0089238
0.564	0.489745	0.0528318	0.023814	0.223919	0.0319138	0.00749259	0.297316	0.00889155	0.0098164
0.565	0.488888	0.0533085	0.0231881	0.219093	0.032911	0.00558231	0.302532	0.010288	0.0106277
0.566	0.486448	0.0539131	0.0226376	0.21483	0.0339433	0.00402187	0.306122	0.0113936	0.0112653
0.567	0.482666	0.0544876	0.022116	0.21132	0.0346923	0.00311922	0.308061	0.0121677	0.0116666
0.568	0.477878	0.0548759	0.0215699	0.208758	0.0350757	0.00292618	0.308613	0.0126892	0.0116545
0.569	0.472513	0.055033	0.0210164	0.207289	0.0351087	0.00326837	0.308457	0.0130959	0.011106
0.57	0.466964	0.0550477	0.0205891	0.206871	0.0345799	0.00385847	0.308491	0.0135595	0.0100666
0.571	0.461611	0.054997	0.0204444	0.207371	0.0328669	0.00449282	0.309357	0.0142008	0.00867269
0.572	0.456942	0.0547841	0.0206122	0.208749	0.0289367	0.00515683	0.311284	0.0150122	0.00710299
0.573	0.453472	0.054222	0.0209923	0.211195	0.0212046	0.00590459	0.314263	0.0158888	0.00550152
0.574	0.451599	0.053238	0.0214534	0.214892	0.00765842	0.00665501	0.317967	0.0167197	0.00392728
0.575	0.451521	0.0519322	0.0217896	0.219628	-0.0126274	0.00722165	0.321685	0.0174182	0.00242232
0.576	0.45321	0.0504943	0.0217377	0.224929	-0.0378768	0.00747265	0.324446	0.01784	0.00103457
0.577	0.456462	0.049128	0.0212704	0.230346	-0.0641103	0.00735243	0.325274	0.0177808	-0.000186693
0.578	0.460919	0.0479785	0.0206395	0.235365	-0.0869821	0.00681038	0.323511	0.0171539	-0.00111339
0.579	0.466078	0.0471058	0.0200671	0.239238	-0.103179	0.00577455	0.319003	0.0160778	-0.00154422
0.58	0.471437	0.04658	0.0196032	0.241022	-0.110895	0.00421233	0.312231	0.0146903	-0.00137353
0.581	0.476777	0.0465037	0.0192185	0.239732	-0.109715	0.00222459	0.304423	0.0130058	-0.000681837
0.582	0.482218	0.0468872	0.0188923	0.234626	-0.10035	9.40001e-05	0.297251	0.0110593	0.000386972
0.583	0.48799	0.0476431	0.0186241	0.225463	-0.08434	-0.00182008	0.292256	0.00899433	0.00168812
0.584	0.494263	0.0487015	0.0184824	0.212494	-0.0637927	-0.00328542	0.290365	0.00699894	0.00296862
0.585	0.50107	0.0499561	0.0186336	0.196234	-0.0412689	-0.0042714	0.291633	0.00528401	0.0038639
0.586	0.508285	0.0511473	0.0191973	0.177128	-0.0195992	-0.00484044	0.295397	0.00400799	0.00411515
0.587	0.515607	0.0519552	0.0200614	0.155396	-0.00117154	-0.00504658	0.300711	0.00321823	0.00381332
0.588	0.522479	0.0522058	0.0209542	0.131144	0.012827	-0.00491842	0.306478	0.00293329	0.00322499
0.589	0.528167	0.0519385	0.0216365	0.10455	0.0222811	-0.00447489	0.311478	0.00315699	0.00235964
0.59	0.532016	0.0513167	0.021857	0.0760655	0.0276481	-0.00375672	0.314655	0.00375855	0.0010471
0.591	0.533609	0.0505524	0.0214136	0.0464279	0.0298196	-0.00289462	0.315266	0.00444842	-0.000716141
0.592	0.532701	0.049847	0.0204498	0.0165407	0.0299085	-0.00214892	0.312881	0.00494496	-0.0027454
0.593	0.529152	0.0493087	0.0193045	-0.0126475	0.0289005	-0.00175572	0.307432	0.00508701	-0.00480781
0.594	0.522941	0.0489739	0.0181681	-0.0404446	0.0275315	-0.00177271	0.299178	0.00482593	-0.00671612
0.595	0.514261	0.0489456	0.0171194	-0.0667267	0.0262847	-0.00211952	0.288684	0.0043033	-0.00831029
0.596	0.503565	0.0494154	0.01622	-0.0918092	0.0253966	-0.00262336	0.276699	0.00381537	-0.0094847
0.597	0.491431	0.0504366	0.0154998	-0.11595	0.0249169	-0.00309665	0.263827	0.00353009	-0.010279
0.598	0.47854	0.0517587	0.0149044	-0.139	0.0247989	-0.00354353	0.250449	0.00336473	-0.0107876
0.599	0.465731	0.053022	0.0143428	-0.160458	0.025001	-0.00418828	0.236871	0.00317065	-0.0110692
0.6	0.453901	0.0540139	0.013801	-0.179686	0.025531	-0.00520833	0.223446	0.00287344	-0.0111199
0.601	0.443842	0.0546754	0.0133145	-0.196099	0.0263107	-0.00654261	0.210735	0.00246167	-0.010853
0.602	0.436025	0.0550154	0.0129578	-0.209254	0.0270619	-0.00800041	0.199417	0.0020355	-0.010279
0.603	0.430476	0.0550963	0.0128352	-0.218703	0.0274129	-0.00943719	0.19007	0.00181509	-0.00960574
0.604	0.42686	0.054999	0.0130213	-0.223486	0.0270748	-0.0107677	0.183306	0.00197252	-0.00909832
0.605	0.424669	0.0547486	0.0135839	-0.2219	0.0259874	-0.0118711	0.1798	0.00248567	-0.00897585
0.606	0.423477	0.0543111	0.0145137	-0.212085	0.0243446	-0.0126067	0.179832	0.00318324	-0.0093391
0.607	0.422954	0.0536408	0.0156904	-0.192979	0.0224732	-0.012995	0.183185	0.00388876	-0.0101641
0.608	0.422699	0.0527532	0.0169708	-0.164849	0.0206767	-0.0131587	0.189466	0.00450197	-0.011353
0.609	0.422247	0.0517469	0.0181282	-0.129129	0.0191296	-0.0131193	0.198216	0.00509328	-0.0126996
0.61	0.421228	0.0507357	0.0188913	-0.0880378	0.0178977	-0.0128832	0.208859	0.0058814	-0.0138571
0.611	0.419465	0.0497676	0.0191401	-0.0444003	0.0170313	-0.0125451	0.220764	0.00703389	-0.0145473
[truncated: 2,388 more rows]

## Sheet: D583N_surfer_traces
time (s)	current (nA)
[truncated: 3,000 more rows]

## Sheet: K586E_surfer_traces
time (s)	current (nA)
[truncated: 3,000 more rows]

## Sheet: K586Q_surfer_traces
time (s)	current (nA)
[truncated: 3,000 more rows]

## Sheet: K586H_surfer_traces
time (s)	current (nA)
[truncated: 3,000 more rows]
