# Supplementary material for: Conduction pathway for potassium through the Escherichia coli pump KdpFABC
Source: eLife. 2025 Nov 19;14:RP107397. doi: 10.7554/eLife.107397 (PMC12629597; doi:10.7554/eLife.107397)
Supplement: Figure 5—source data 1. [file elife-107397-fig5-data1.xlsx]

## Sheet: Fig5B
ATPase activity															transport
mutants	ATPase values														mutants	transport (nA)
WT	7.847	7.7712	8.3587	6.6315	5.7338	7.3669	2.5459	3.2313							WT	1.989	1.73	1.717	1.371	1.1178	1.1172
D583A	2.5459	2.5459	3.2313	2.8357											D583A	-0.0044	0.021	0.0169	0.0358	-0.0004	-0.006	-0.0187	0.0109	0.0086
D583N	0.493676	0.493676	0.205573	0.165059	0.480171	0.432154	0.360129								D583K	-0.0173	-0.0059	0.0034	0.0048	0.0065	0.0081	0.0082	0.0012	0.0063
D583K	0.292478	0.292478	0.269717	0.252646	0.299306	0.62934	0.215091								D583N	0.0285	0.0281	0.0513	-0.0098	0.0818	0.0625
K586A															K586E	0.0199	0.0439	0.0402	0.061	0.0683	0.0431
K586H	0	0.0363233	0.0391174	0	0.0223528	0.0167646									K586Q	0.006	-0.0002	0	-0.0091	0.0026	0.0069
K586Q	0.0866171	0.130225	0.0578778	0.195587	0.209149	0.185472									K586H	0.0005	0.0118	0.0121
K586E	1.21543	1.02346	1.10826	0.968107	1.08706	1.08942									K586A	0.0156	0.0049	-0.0276	-0.002	0.0077	0.0146
D583K_K586D	0.339922	0.0711712	0.432338	0.281498	0.143405	0.29637									D583K_K586D
