# Supplementary material for: Conduction pathway for potassium through the Escherichia coli pump KdpFABC
Source: eLife. 2025 Nov 19;14:RP107397. doi: 10.7554/eLife.107397 (PMC12629597; doi:10.7554/eLife.107397)
Supplement: Figure 6—figure supplement 1—source data 1. [file elife-107397-fig6-figsupp1-data1.xlsx]

## Sheet: figure6-FigureSupplement1-Sourc
ATPase activity @0.1 mM K										transport @ 100 mM K
pH	ATPase activity (µmol Pi/mg/min)									pH	current (nA)
	1	2	3	4	5	6				5.9	0.402699	0.323254	0.321856	0.34551	0.265787	0.289598
5.6	0.8508	0.8536	0.8597	0.7075	0.6079	0.7103				6.4	0.537598	0.479709	0.480355	0.441098	0.378413	0.396883
5.9	1.01951	1.28048	1.17725	1.04503	1.03807	1.0717				6.9	0.521355	0.533539	0.528361	0.444249	0.414767	0.441876
6.2	1.2875	1.399	1.2887	1.5538	1.3946	1.2414				7.3	0.411588	0.421454	0.45162	0.523369	0.461002	0.491426
6.4	0.8685	0.8461	0.9337	0.8587	0.9171	0.7586				7.7	0.442549	0.406606	0.42172	0.416837	0.375515	0.372721
6.6	0.163539	0.255168	0.211093	0.186736	0.320119	0.400149				8.3	0.420623	0.344776	0.336021	0.262008	0.254755	0.247145
6.9	0.3744	0.1716	0.3289	0.3319	0.5615	0.2552				8.6	0.253983	0.22157	0.238217	0.183752	0.166634	0.172081
7.3	0.2495	0.161	0.2488	0.1834	0.2054	2.1981
7.5	0.200655	0.169339	0.230811	0.163539	0.204134	0.168179
7.7	0.212253	0.185576	0.186736	0.153101	0.162379	0.146141
7.9	0.1742	0.311	0.3679	0.1913	0.1613	0.1048
8.3	0.132223	0.119465	0.142662	0.259807	0.176298	0.142662
ATPase activity @150 mM K
pH	ATPase activity (µmol Pi/mg/min)
	1	2	3	4	5	6
5.6	1.7962	1.9988	1.9993	2.0205	2.0291	1.8985
5.9	1.81249	1.96145	1.99399	1.4908	1.85505	1.68482
6.2	2.1377	2.1783	2.0365	1.9774	1.9459
6.4	1.3127	1.2001	1.1871	1.4956	1.5524	1.3208
6.6	0.550758	0.466893	0.360496	0.41432	0.356741	0.428089
6.9	0.5109	0.5898	0.3306	0.512	0.7903	0.4556
7.3	0.4562	0.5555	0.5044	0.4605	0.9625	0.5108
7.5	0.216548	0.295407	0.247841	0.352986	0.306672	0.296658
7.7	0.501941	0.360496	0.296658	0.369258	0.360496	0.22531
7.9	0.4792	0.3795	0.112	0.15	0.7309	0.1798
8.3	0.227814	0.123921	0.212793	0.221555	0.153962	0.336713
