# Supplementary material for: Conduction pathway for potassium through the Escherichia coli pump KdpFABC
Source: eLife. 2025 Nov 19;14:RP107397. doi: 10.7554/eLife.107397 (PMC12629597; doi:10.7554/eLife.107397)
Supplement: Figure 6—figure supplement 2—source data 1. [file elife-107397-fig6-figsupp2-data1.xlsx]

## Sheet: WT_pH5.9_surfer_traces
time (s)	current (nA)
0	-3.67798e-06	-3.69076e-05	-0.000140289	7.39856e-06	-3.67798e-06	2.58595e-05
0.001	-1.23673e-05	-0.000190947	-0.000827754	4.3467e-05	-3.45203e-05	0.000135293
0.002	-2.95499e-05	-0.000459553	-0.00243284	0.000151787	-0.000141218	0.000330481
0.003	-9.98273e-05	-0.000775374	-0.00498803	0.000413462	-0.000344351	0.000485747
0.004	-0.000234452	-0.00121072	-0.00828269	0.000881828	-0.000600236	0.000454775
0.005	-0.000287314	-0.00187018	-0.0120508	0.00148747	-0.00087259	0.000270456
0.006	-7.2317e-05	-0.0026162	-0.0160625	0.00210183	-0.00118526	0.000108154
0.007	0.00047585	-0.00323218	-0.0200104	0.00266324	-0.00152349	4.72012e-05
0.008	0.00133062	-0.00372427	-0.0234525	0.00318471	-0.0017389	-5.89339e-07
0.009	0.00245734	-0.00421548	-0.0260385	0.00370705	-0.0016792	-0.000130804
0.01	0.00381908	-0.00480061	-0.0277815	0.00426929	-0.00133873	-0.000313713
0.011	0.00527757	-0.00559987	-0.028998	0.00488857	-0.000815618	-0.000426158
0.012	0.00664221	-0.00671106	-0.0298584	0.00559993	-0.000232045	-0.000320888
0.013	0.00778524	-0.00808517	-0.0302749	0.00647805	0.000343757	8.92724e-05
0.014	0.00858665	-0.00948482	-0.0302324	0.00751614	0.000933335	0.00076687
0.015	0.00900268	-0.0106555	-0.029793	0.00855785	0.00152524	0.00154791
0.016	0.00911141	-0.011569	-0.0288874	0.00940309	0.00196643	0.00223555
0.017	0.00895268	-0.0123307	-0.0273742	0.00990425	0.00207848	0.00274386
0.018	0.0085062	-0.0129626	-0.0252214	0.0100434	0.00185622	0.00308749
0.019	0.00780291	-0.0133649	-0.0225739	0.00994521	0.00148374	0.00329586
0.02	0.00696929	-0.0133805	-0.0196331	0.00972871	0.00112478	0.00334264
0.021	0.00615013	-0.0130034	-0.0165845	0.00949298	0.000732678	0.00315329
0.022	0.00548014	-0.012366	-0.0137225	0.00940588	0.000148459	0.00273175
0.023	0.00511503	-0.011511	-0.0112859	0.00957563	-0.000676703	0.00219504
0.024	0.00509025	-0.0104844	-0.00907584	0.00993631	-0.00163595	0.0016703
0.025	0.00526859	-0.00942796	-0.0066564	0.0103412	-0.00257304	0.00118406
0.026	0.005516	-0.00853033	-0.00392804	0.0107302	-0.00337872	0.000645729
0.027	0.00579041	-0.00796892	-0.00121221	0.0111973	-0.00403449	1.9246e-05
0.028	0.00614067	-0.00776149	0.00114802	0.0117933	-0.00453922	-0.000529414
0.029	0.00666303	-0.00782661	0.00304454	0.0123923	-0.0048345	-0.000769405
0.03	0.00734386	-0.00810115	0.00447898	0.0128869	-0.00494385	-0.000591788
0.031	0.00797999	-0.00848	0.00542216	0.0132857	-0.00496881	-3.59308e-05
0.032	0.00835123	-0.00885116	0.00588445	0.0135746	-0.00490771	0.000772732
0.033	0.0084118	-0.00921764	0.0059033	0.0137172	-0.00469515	0.00171833
0.034	0.00819262	-0.00966177	0.00539923	0.0137734	-0.00425892	0.00272097
0.035	0.00771598	-0.0102177	0.00418689	0.0138077	-0.0034827	0.0036703
0.036	0.00716503	-0.010846	0.00220632	0.0137825	-0.00228352	0.00444478
0.037	0.00686311	-0.0114904	-0.000177525	0.0136645	-0.000731573	0.00506287
0.038	0.00702581	-0.0121223	-0.00228793	0.0134731	0.000934102	0.00568516
0.039	0.00761654	-0.0126618	-0.0036863	0.0132516	0.0024216	0.00639687
0.04	0.00839674	-0.0129076	-0.00438004	0.0130543	0.00358361	0.00711139
0.041	0.00915525	-0.012683	-0.00455538	0.0128561	0.0044362	0.00772878
0.042	0.00983518	-0.0120291	-0.00438091	0.0125893	0.00501726	0.00827587
0.043	0.0104417	-0.0111739	-0.00407136	0.0123254	0.0053553	0.00881173
0.044	0.0109513	-0.0103076	-0.003903	0.0121971	0.00544241	0.00930518
0.045	0.0112715	-0.00942375	-0.0040003	0.0122004	0.0052619	0.00967114
0.046	0.0112602	-0.00834997	-0.00424374	0.0122564	0.00489681	0.00982874
0.047	0.0108354	-0.00699689	-0.004393	0.0123072	0.00445053	0.00972616
0.048	0.0100152	-0.00558541	-0.00422237	0.0122848	0.00399937	0.00936218
0.049	0.00889252	-0.0044878	-0.00372161	0.0121521	0.00371318	0.00879091
0.05	0.00767238	-0.00386682	-0.0031666	0.0118927	0.00375906	0.0081488
0.051	0.00652736	-0.00357829	-0.00284245	0.0114803	0.00408407	0.00759934
0.052	0.00534789	-0.00339293	-0.0027665	0.0110012	0.00452629	0.00713376
0.053	0.00391937	-0.00316437	-0.00276859	0.0106027	0.00499936	0.00659921
0.054	0.0022386	-0.00280369	-0.00275501	0.0103432	0.00543481	0.0059582
0.055	0.000476534	-0.00234512	-0.00274846	0.0102407	0.00577641	0.00529015
0.056	-0.00112435	-0.00203381	-0.00271962	0.0102975	0.00604328	0.00462691
0.057	-0.0023015	-0.00214998	-0.00257903	0.0104252	0.00633811	0.00392632
0.058	-0.00290075	-0.00284889	-0.00229739	0.0105092	0.00674184	0.00313552
0.059	-0.00293729	-0.00415163	-0.00187731	0.0105144	0.00714057	0.0022975
0.06	-0.00252005	-0.00590612	-0.00137069	0.0104769	0.00733592	0.00161971
0.061	-0.00172616	-0.00791142	-0.000943041	0.0104892	0.00728951	0.00136169
0.062	-0.000654731	-0.0101058	-0.000692764	0.010597	0.00713643	0.00162941
0.063	0.000420464	-0.0123802	-0.000583961	0.0106949	0.00707357	0.00237265
0.064	0.00121018	-0.0143286	-0.000643749	0.0106816	0.00727251	0.00353133
0.065	0.00165453	-0.0155233	-0.000962136	0.0106255	0.00776988	0.00502757
0.066	0.00182066	-0.0159289	-0.00155954	0.0106144	0.00843372	0.00673973
0.067	0.00170043	-0.0158523	-0.00237322	0.0105341	0.00907844	0.00852689
0.068	0.00126443	-0.0155902	-0.00323314	0.0101837	0.00953756	0.0101776
0.069	0.000605049	-0.0152464	-0.00395253	0.00953405	0.00967778	0.0114635
0.07	-8.34421e-05	-0.0148842	-0.00453395	0.00872103	0.00949746	0.012216
0.071	-0.000659341	-0.0146072	-0.00511311	0.00793536	0.00917233	0.0122964
0.072	-0.00118199	-0.0144359	-0.00576388	0.00737794	0.00888941	0.0116754
0.073	-0.00180357	-0.0143156	-0.00646018	0.00714154	0.00871217	0.0105497
0.074	-0.00252559	-0.0142758	-0.0070551	0.0071528	0.00865316	0.00924734
0.075	-0.00324475	-0.0143888	-0.00731897	0.0073095	0.00875617	0.00802636
0.076	-0.00381965	-0.0145812	-0.00720871	0.00762264	0.00904244	0.0070156
0.077	-0.00402977	-0.0148172	-0.00699806	0.00815832	0.00942916	0.0062233
0.078	-0.00372456	-0.0152881	-0.00699877	0.00891669	0.00975745	0.00552463
0.079	-0.00293737	-0.0161895	-0.00724854	0.00982806	0.00992459	0.00475337
0.08	-0.00192424	-0.0175467	-0.00756928	0.0107545	0.00991961	0.00381181
0.081	-0.00106364	-0.0192395	-0.00787139	0.0114848	0.00972676	0.00271492
0.082	-0.000519427	-0.0211049	-0.00819132	0.0117903	0.0093453	0.0016167
0.083	-0.000249061	-0.0230153	-0.00843896	0.011585	0.00882018	0.000687522
0.084	-0.000306337	-0.0248082	-0.00844481	0.0110221	0.00815149	-3.12201e-05
0.085	-0.000770384	-0.0262349	-0.00828409	0.0103072	0.00733719	-0.00055135
0.086	-0.00151064	-0.0271681	-0.00828142	0.00954616	0.0064701	-0.000834796
0.087	-0.0023294	-0.0277586	-0.00872862	0.00881917	0.00566375	-0.000801714
0.088	-0.00319158	-0.0281524	-0.00967669	0.00822915	0.00496688	-0.000401365
0.089	-0.00414869	-0.0282562	-0.0108787	0.00788146	0.00436993	0.000290157
0.09	-0.00519314	-0.0279278	-0.0119602	0.00785925	0.0038534	0.00101462
0.091	-0.00621843	-0.0272091	-0.0127131	0.00814494	0.00339328	0.0014214
0.092	-0.00709503	-0.0263062	-0.0131533	0.00858505	0.00293187	0.00136472
0.093	-0.00780543	-0.0254077	-0.0134135	0.00905952	0.00240503	0.00105601
0.094	-0.00838315	-0.0246416	-0.0136969	0.00952945	0.00171476	0.000789206
0.095	-0.00876931	-0.0241054	-0.0141574	0.00986786	0.000758307	0.00062894
0.096	-0.00896789	-0.0238067	-0.0147942	0.00994322	-0.000372302	0.000466036
0.097	-0.00918261	-0.0236837	-0.0155501	0.00982265	-0.00142705	0.00027238
0.098	-0.00954427	-0.0237159	-0.0164458	0.00970767	-0.00225867	0.000111801
0.099	-0.00990963	-0.023978	-0.0175267	0.00971849	-0.00286975	3.59877e-05
0.1	-0.0100569	-0.0245279	-0.0187373	0.00976526	-0.00331417	0.000129232
0.101	-0.00986825	-0.0252895	-0.0199656	0.00965025	-0.00364381	0.000470508
0.102	-0.00932321	-0.0260838	-0.0210768	0.00931856	-0.00389411	0.00102357
0.103	-0.00853434	-0.0266746	-0.021886	0.00887758	-0.00409252	0.0016613
0.104	-0.00767917	-0.0268984	-0.0222723	0.00847216	-0.00430033	0.00229355
0.105	-0.00679228	-0.0267602	-0.0223154	0.00826152	-0.00458101	0.00283999
0.106	-0.00583571	-0.0263149	-0.022236	0.00829792	-0.00488551	0.00313861
0.107	-0.00494265	-0.0256212	-0.0222067	0.00847535	-0.00513319	0.003126
0.108	-0.00434751	-0.0247636	-0.0222358	0.00872904	-0.0053458	0.00298051
0.109	-0.00415234	-0.0237699	-0.0221899	0.00913759	-0.00556056	0.00294017
0.11	-0.00429558	-0.0226669	-0.0219058	0.00973094	-0.00571817	0.00303345
0.111	-0.0046328	-0.0216012	-0.0213096	0.0103977	-0.00574682	0.00305596
0.112	-0.00503469	-0.0207594	-0.0204768	0.011046	-0.0056804	0.0028489
0.113	-0.00542551	-0.0202779	-0.0195026	0.0116512	-0.0055956	0.00245211
0.114	-0.00576477	-0.02024	-0.0183538	0.0121771	-0.00551922	0.00198805
0.115	-0.00606693	-0.0206458	-0.0169593	0.0125664	-0.00538491	0.00155276
0.116	-0.00638938	-0.0213561	-0.0153617	0.0128271	-0.00510922	0.0011408
0.117	-0.00674874	-0.0221024	-0.0137588	0.0130488	-0.00475444	0.000652299
0.118	-0.00707779	-0.0226795	-0.0123565	0.013272	-0.00443535	3.36024e-05
0.119	-0.0073409	-0.0232089	-0.0112254	0.0133723	-0.00420453	-0.000675016
0.12	-0.00759575	-0.0240337	-0.0104483	0.0131836	-0.00413512	-0.0014125
0.121	-0.00791254	-0.025274	-0.0101798	0.0127307	-0.00425326	-0.00214384
0.122	-0.00832032	-0.0267352	-0.0104471	0.0121138	-0.00447469	-0.00284165
0.123	-0.0087722	-0.0281653	-0.0111531	0.0113079	-0.0047392	-0.00340588
0.124	-0.0091862	-0.0294012	-0.0121855	0.0103109	-0.00508775	-0.00367743
0.125	-0.00952529	-0.030339	-0.0133979	0.00928486	-0.00558918	-0.00359374
0.126	-0.00980892	-0.0308752	-0.0146604	0.00842123	-0.00621835	-0.00327103
0.127	-0.0100779	-0.0310187	-0.0159893	0.00782746	-0.00689314	-0.00291422
0.128	-0.0103201	-0.0309899	-0.017568	0.00758978	-0.00759239	-0.00269322
0.129	-0.010468	-0.0310114	-0.019442	0.00775588	-0.00832223	-0.00267417
0.13	-0.0104912	-0.031076	-0.0213161	0.00824117	-0.00905382	-0.00278794
0.131	-0.0103789	-0.0311172	-0.0229307	0.00885776	-0.00968076	-0.00287753
0.132	-0.0100612	-0.0311758	-0.0243335	0.00940722	-0.0100353	-0.00283103
0.133	-0.0095248	-0.0312438	-0.0256233	0.00980243	-0.0100602	-0.00272279
0.134	-0.00890803	-0.0312625	-0.026698	0.010101	-0.00986878	-0.00273243
0.135	-0.0083502	-0.0312328	-0.0273556	0.0103285	-0.00960647	-0.00279172
0.136	-0.00790828	-0.0311621	-0.0276148	0.0104107	-0.00933311	-0.00256459
0.137	-0.00759982	-0.0309843	-0.0277288	0.0103367	-0.00905143	-0.00190135
0.138	-0.00739746	-0.0305645	-0.0278567	0.0102086	-0.00883701	-0.000944194
0.139	-0.00723644	-0.0298584	-0.0280377	0.0101166	-0.00875918	0.000110327
0.14	-0.00705091	-0.0290343	-0.0283329	0.0101208	-0.008757	0.00103145
0.141	-0.00683928	-0.0283271	-0.0286714	0.0102993	-0.00880637	0.0016081
0.142	-0.00669776	-0.0278592	-0.0288541	0.0106548	-0.00899713	0.00181272
0.143	-0.00675259	-0.0276333	-0.0288768	0.011046	-0.00934253	0.0017979
0.144	-0.00705058	-0.0275536	-0.0289355	0.0113025	-0.00969891	0.00177073
0.145	-0.00752896	-0.0275031	-0.0291356	0.0113385	-0.00991734	0.00187325
0.146	-0.00810416	-0.0275054	-0.0293988	0.0111077	-0.0100022	0.00212424
0.147	-0.00879392	-0.0277063	-0.0295802	0.0105936	-0.010116	0.00243772
0.148	-0.00970179	-0.0281998	-0.0295836	0.00989644	-0.0104161	0.00270426
0.149	-0.0107586	-0.0289445	-0.0293449	0.00921767	-0.0109024	0.00281037
0.15	-0.0117057	-0.0298267	-0.0288422	0.00875146	-0.0115127	0.00268163
0.151	-0.0124426	-0.0307542	-0.0282442	0.00855009	-0.0122127	0.00239429
0.152	-0.0130121	-0.0316909	-0.0278371	0.00851802	-0.0129039	0.00205391
0.153	-0.0133464	-0.0325727	-0.0277605	0.00858235	-0.0134638	0.00163936
0.154	-0.0133931	-0.0331786	-0.028035	0.00873043	-0.01388	0.00108519
0.155	-0.0131802	-0.0332704	-0.0286915	0.00897771	-0.0142699	0.000332848
0.156	-0.0126335	-0.0328956	-0.0297243	0.00943515	-0.0147202	-0.000656352
0.157	-0.0117193	-0.0322948	-0.0311145	0.0101524	-0.0151771	-0.0017669
0.158	-0.0105939	-0.0314894	-0.0328088	0.0109713	-0.0156079	-0.00275862
0.159	-0.00943927	-0.0303337	-0.0345137	0.011727	-0.0159961	-0.00351153
0.16	-0.00840521	-0.0289166	-0.0357813	0.0123413	-0.0161968	-0.00407248
0.161	-0.0076418	-0.0275159	-0.0363509	0.0127516	-0.0160575	-0.0044867
0.162	-0.00727662	-0.0262728	-0.0361796	0.0129312	-0.0155313	-0.0047404
0.163	-0.00738402	-0.025126	-0.035304	0.0129117	-0.0146282	-0.0047977
0.164	-0.00790045	-0.0239826	-0.0339106	0.012737	-0.0134767	-0.00453543
0.165	-0.00858468	-0.0228156	-0.0323114	0.0124295	-0.0124087	-0.00381907
0.166	-0.00925142	-0.0216409	-0.0306782	0.0120153	-0.0117434	-0.00272499
0.167	-0.0100031	-0.0205099	-0.0289935	0.0115284	-0.0115268	-0.00151043
0.168	-0.0110426	-0.0194777	-0.0272792	0.0110043	-0.01161	-0.000404663
0.169	-0.0123965	-0.0185843	-0.0256461	0.0105013	-0.0118268	0.000511054
0.17	-0.0139572	-0.0179045	-0.0241062	0.0100998	-0.0120438	0.00127171
0.171	-0.0156107	-0.0174986	-0.022545	0.00988986	-0.0122144	0.00192871
0.172	-0.0171755	-0.017345	-0.020889	0.00988005	-0.0123864	0.00246018
0.173	-0.0183569	-0.0173909	-0.01925	0.00993739	-0.012555	0.00275566
0.174	-0.018886	-0.0174731	-0.0178708	0.00990688	-0.0126332	0.00267429
0.175	-0.0186695	-0.0173208	-0.016896	0.00970017	-0.0125886	0.00211995
0.176	-0.0177374	-0.0168101	-0.0163781	0.00935046	-0.0124326	0.00115503
0.177	-0.0161536	-0.0160278	-0.0164062	0.00904311	-0.0121015	3.81314e-05
0.178	-0.0141358	-0.0151153	-0.017005	0.00895201	-0.0115001	-0.000906472
0.179	-0.0120526	-0.0141312	-0.0180343	0.00909833	-0.0106912	-0.00145587
0.18	-0.0102645	-0.0130393	-0.0192451	0.00942472	-0.00988756	-0.0015763
0.181	-0.00903885	-0.0118309	-0.0203787	0.00986512	-0.00922051	-0.00140082
0.182	-0.00845193	-0.0106152	-0.0212556	0.0103108	-0.00862767	-0.00114757
0.183	-0.00837959	-0.0095346	-0.0217724	0.010608	-0.00792085	-0.00105235
0.184	-0.00861424	-0.00860186	-0.0218111	0.0106768	-0.00700214	-0.00119568
0.185	-0.00902444	-0.00775886	-0.0213687	0.0105817	-0.00598743	-0.00143725
0.186	-0.00960309	-0.00706339	-0.0206995	0.0103809	-0.00500072	-0.00172785
0.187	-0.0103324	-0.00665688	-0.0200183	0.0100656	-0.00406801	-0.00222734
0.188	-0.0110993	-0.00660722	-0.0193386	0.00962409	-0.00326547	-0.00302165
0.189	-0.0117654	-0.00688881	-0.01872	0.00905529	-0.00274177	-0.00399496
0.19	-0.012244	-0.0074553	-0.0183001	0.0084259	-0.00255426	-0.00490235
0.191	-0.0124369	-0.00822313	-0.018087	0.00784217	-0.00252633	-0.00547211
0.192	-0.0121743	-0.00904749	-0.0178774	0.00738278	-0.00232164	-0.00563629
0.193	-0.011319	-0.00985415	-0.017457	0.00715362	-0.00171962	-0.00560158
0.194	-0.00996044	-0.0107424	-0.0168198	0.00726657	-0.000766444	-0.00559788
0.195	-0.00840437	-0.01187	-0.0160732	0.00772501	0.000351584	-0.00573235
0.196	-0.00689458	-0.0132588	-0.0153508	0.0084034	0.00147981	-0.00604025
0.197	-0.00556742	-0.0147683	-0.0148219	0.00913419	0.00251211	-0.00648399
0.198	-0.0045902	-0.0162832	-0.0146035	0.00979683	0.00334778	-0.00689313
0.199	-0.00407543	-0.0177657	-0.0147542	0.0102693	0.00390714	-0.00706139
0.2	-0.00400303	-0.019147	-0.015241	0.0104239	0.00413884	-0.00696665
0.201	-0.00434129	-0.0204535	-0.0158382	0.0102798	0.00403219	-0.00674557
0.202	-0.00502121	-0.0218155	-0.0162568	0.00996472	0.00364806	-0.00645609
0.203	-0.00575598	-0.0231822	-0.0163205	0.00957702	0.0031279	-0.00603419
0.204	-0.00623561	-0.0243612	-0.0159079	0.0092173	0.00262907	-0.0054107
0.205	-0.00646247	-0.0252407	-0.014851	0.00902488	0.00219968	-0.00453873
0.206	-0.00659213	-0.0258035	-0.0130536	0.00910749	0.00179207	-0.00338799
0.207	-0.00665103	-0.0261068	-0.010691	0.00949087	0.00135787	-0.00198074
0.208	-0.00657648	-0.0262203	-0.00819413	0.0101282	0.000888675	-0.000429301
0.209	-0.00624037	-0.0261558	-0.00606026	0.0108901	0.000436237	0.00114749
0.21	-0.00550315	-0.025912	-0.00464684	0.0115849	8.06209e-05	0.00270551
0.211	-0.00442079	-0.0254884	-0.00404649	0.0120663	-0.00011084	0.00413966
0.212	-0.00324608	-0.024882	-0.00410575	0.0123776	-0.000105239	0.00521873
0.213	-0.00225288	-0.0241666	-0.00461203	0.0126574	7.34717e-05	0.00575023
0.214	-0.00157071	-0.0234905	-0.00552057	0.0129141	0.000370302	0.00574859
0.215	-0.00119437	-0.0229356	-0.006891	0.0131422	0.00075534	0.00540419
0.216	-0.00112184	-0.0224864	-0.00869795	0.0134333	0.0012177	0.00490942
0.217	-0.00134598	-0.0221495	-0.0108309	0.0138209	0.00168983	0.00440945
0.218	-0.00179936	-0.0219099	-0.0131486	0.014212	0.00206077	0.00397907
0.219	-0.00241945	-0.0215232	-0.0155122	0.0144519	0.00229126	0.00357004
0.22	-0.00320629	-0.0206555	-0.0178089	0.0144804	0.00242203	0.00313008
0.221	-0.00420409	-0.0193433	-0.0200267	0.0143559	0.00245561	0.00265681
0.222	-0.00543282	-0.0179956	-0.0222294	0.0140704	0.00235397	0.0021349
0.223	-0.00675855	-0.0168879	-0.0242761	0.0135962	0.0021507	0.00161177
0.224	-0.00787422	-0.0160202	-0.0258182	0.0130362	0.00194484	0.00117294
0.225	-0.00851182	-0.0154131	-0.0267245	0.0125178	0.00183484	0.000777803
0.226	-0.00865225	-0.0150679	-0.0271932	0.0120818	0.00188115	0.000326798
0.227	-0.00839343	-0.0147584	-0.027337	0.0117343	0.00209382	-0.000144908
0.228	-0.00773281	-0.0142966	-0.026987	0.0115153	0.00243235	-0.000501497
0.229	-0.00666465	-0.0138019	-0.0260577	0.0114706	0.00282455	-0.000696414
0.23	-0.00531732	-0.0134757	-0.0248433	0.0115727	0.00322306	-0.000766467
0.231	-0.00386489	-0.0133582	-0.0237884	0.0117552	0.00354829	-0.000702141
0.232	-0.00239244	-0.0133975	-0.0229739	0.0119936	0.00365684	-0.000492134
0.233	-0.00094886	-0.013577	-0.0220119	0.0122544	0.00349911	-0.000188169
0.234	0.000425039	-0.0138834	-0.0205945	0.0124221	0.00319901	0.000144062
0.235	0.00177738	-0.0142448	-0.0188216	0.0123812	0.00294833	0.000469168
0.236	0.00310163	-0.0146182	-0.0169131	0.0121619	0.00280394	0.000746973
0.237	0.00424924	-0.0150295	-0.0149526	0.0119056	0.00266329	0.000944957
0.238	0.0051273	-0.0154372	-0.012989	0.011691	0.0025004	0.00113322
0.239	0.00573559	-0.0157254	-0.0111938	0.0114928	0.00239687	0.00141245
0.24	0.00607408	-0.0159231	-0.00976232	0.0112927	0.00243109	0.00178797
0.241	0.00619344	-0.0162637	-0.00877882	0.011141	0.00266235	0.00215598
0.242	0.00620278	-0.0169624	-0.00834659	0.0110728	0.00307182	0.00237622
0.243	0.00614893	-0.017918	-0.00861136	0.0110564	0.00353472	0.00241101
0.244	0.00598164	-0.0187575	-0.0094952	0.0110349	0.0038412	0.00231988
0.245	0.00566751	-0.0192936	-0.0106459	0.0109205	0.00384189	0.00214251
0.246	0.00524537	-0.0195878	-0.0117434	0.0106555	0.00359451	0.00189361
0.247	0.00480455	-0.0196139	-0.0126986	0.0103281	0.00329079	0.00161117
0.248	0.00446068	-0.0192605	-0.0135426	0.0100787	0.00316923	0.0013671
0.249	0.00424806	-0.0185461	-0.0142576	0.00994409	0.00336452	0.00123706
0.25	0.00410201	-0.0176381	-0.014776	0.00992042	0.00374233	0.00125636
0.251	0.00403053	-0.0166653	-0.0151058	0.0100097	0.00404276	0.0013641
0.252	0.00408487	-0.0155615	-0.0153503	0.0101328	0.00414942	0.00136579
0.253	0.00417438	-0.0141942	-0.0155592	0.0102368	0.00409053	0.00106513
0.254	0.00419233	-0.012601	-0.0156666	0.0104005	0.00386783	0.000446004
0.255	0.00419084	-0.0109466	-0.0155895	0.010691	0.00345781	-0.00034318
0.256	0.00433693	-0.00928784	-0.015303	0.0110981	0.00286796	-0.00116748
0.257	0.00482169	-0.00766442	-0.0148252	0.01158	0.00210324	-0.00200877
0.258	0.00572685	-0.00632974	-0.0142135	0.0120453	0.0012076	-0.00285409
0.259	0.00701085	-0.00544755	-0.0135787	0.0123741	0.000320385	-0.00360625
0.26	0.00857442	-0.00484663	-0.0130161	0.0125428	-0.000361467	-0.00416802
0.261	0.0101875	-0.00436018	-0.0126092	0.0126377	-0.000704416	-0.00447817
0.262	0.0115468	-0.00400608	-0.0124759	0.0127053	-0.000752679	-0.00448654
0.263	0.0125013	-0.00381743	-0.0126597	0.0126726	-0.000627461	-0.00419215
0.264	0.0130028	-0.00377916	-0.0131037	0.0124117	-0.000390002	-0.00368274
0.265	0.0129793	-0.00389709	-0.0137175	0.0118839	-0.000100905	-0.00311962
0.266	0.0124601	-0.0042059	-0.0143825	0.0112019	0.000156997	-0.0026606
0.267	0.0115394	-0.00467641	-0.0149764	0.010547	0.000275091	-0.00239736
0.268	0.0102287	-0.00514591	-0.0154116	0.0100716	0.000100928	-0.00236576
0.269	0.00857619	-0.00537677	-0.015697	0.00984369	-0.000399481	-0.00249162
0.27	0.00676585	-0.005214	-0.0158915	0.00982691	-0.00106311	-0.00257472
0.271	0.0049514	-0.00470581	-0.0160121	0.00994439	-0.00171413	-0.00248284
0.272	0.00317237	-0.00403588	-0.0161082	0.0101824	-0.00230468	-0.0022304
0.273	0.00155639	-0.00342049	-0.0162958	0.0105266	-0.00285913	-0.00186365
0.274	0.000323475	-0.00307396	-0.0166457	0.0108659	-0.00339723	-0.0013979
0.275	-0.000469278	-0.00304519	-0.0171214	0.0111155	-0.00392658	-0.000846951
0.276	-0.000884134	-0.00321464	-0.0176311	0.0113178	-0.00444017	-0.000212885
0.277	-0.000888467	-0.00359145	-0.0180505	0.0115229	-0.00489121	0.000606518
0.278	-0.000402007	-0.00428411	-0.0182679	0.0116747	-0.00519005	0.00167705
0.279	0.000536831	-0.00522522	-0.0182424	0.0116882	-0.0052804	0.00287904
0.28	0.00174363	-0.00631625	-0.0179007	0.0116211	-0.0051731	0.00412539
0.281	0.00298233	-0.00759217	-0.0171138	0.0116902	-0.00489935	0.00546041
0.282	0.00405369	-0.00891372	-0.0158658	0.0120611	-0.00446761	0.00692015
0.283	0.00477187	-0.00987832	-0.0142945	0.0127246	-0.003862	0.00848052
0.284	0.00499882	-0.0102384	-0.012557	0.0135988	-0.00314847	0.0100273
0.285	0.004818	-0.0101201	-0.0107478	0.0146061	-0.00245597	0.0113401
0.286	0.0045287	-0.00976471	-0.00899105	0.0156347	-0.00185526	0.0122104
0.287	0.00437423	-0.00925594	-0.00751936	0.0165279	-0.00141507	0.012578
0.288	0.00434394	-0.00855266	-0.00647802	0.0172185	-0.00117162	0.012529
0.289	0.00431273	-0.00755367	-0.00575909	0.0178408	-0.00105685	0.0122404
0.29	0.00429983	-0.00605028	-0.00521929	0.0186088	-0.00101249	0.0119303
0.291	0.00445359	-0.00376849	-0.0048815	0.0196577	-0.00103596	0.0118208
0.292	0.00486383	-0.000628024	-0.00481235	0.0211268	-0.00110517	0.012216
0.293	0.00554903	0.00300743	-0.00502376	0.023424	-0.00110456	0.0135773
0.294	0.00655839	0.00661613	-0.00554581	0.0272918	-0.000893472	0.0164349
0.295	0.00797281	0.00995486	-0.00640329	0.0335255	-0.000474643	0.0213126
0.296	0.00975166	0.0130784	-0.00754062	0.0426424	3.15376e-05	0.0287462
0.297	0.0116352	0.0165264	-0.00884197	0.0547421	0.0005375	0.0391574
0.298	0.0133501	0.0217876	-0.010127	0.0695828	0.00104403	0.0525523
0.299	0.014848	0.0312338	-0.011165	0.0867101	0.00160617	0.068373
0.3	0.0161609	0.0473632	-0.011776	0.105487	0.0023213	0.0856729
0.301	0.0171523	0.0720432	-0.0118709	0.125086	0.00327049	0.103385
0.302	0.0176962	0.106126	-0.0114067	0.144628	0.00442117	0.120527
0.303	0.0179025	0.14922	-0.0104208	0.163492	0.00570215	0.136462
0.304	0.0180033	0.199665	-0.00907064	0.181657	0.00707631	0.151143
0.305	0.0182558	0.254996	-0.00750566	0.199901	0.00853115	0.165176
0.306	0.0189035	0.312791	-0.00579304	0.219726	0.0100708	0.179766
0.307	0.0200187	0.37158	-0.00402074	0.243082	0.0116577	0.196711
0.308	0.0214441	0.431382	-0.00235856	0.271978	0.0132879	0.218184
0.309	0.0230172	0.49385	-0.000898382	0.308095	0.0151111	0.246077
0.31	0.0247651	0.562138	0.000647653	0.352413	0.0173641	0.281496
0.311	0.0269261	0.640397	0.00297973	0.404957	0.0203211	0.324779
0.312	0.0301342	0.732792	0.00712634	0.464787	0.0243449	0.375507
0.313	0.0356742	0.84237	0.0146453	0.530202	0.0299119	0.432479
0.314	0.0454927	0.970433	0.027557	0.599127	0.0375736	0.493974
0.315	0.0618628	1.11648	0.0478113	0.669428	0.0477691	0.558034
0.316	0.0866549	1.27828	0.0767589	0.739129	0.0606266	0.622595
0.317	0.12062	1.45195	0.114652	0.806586	0.0759523	0.685715
0.318	0.163216	1.63207	0.160421	0.870583	0.0932248	0.745821
0.319	0.212829	1.81242	0.211999	0.930315	0.111574	0.801914
0.32	0.267234	1.98671	0.267018	0.985236	0.129951	0.853631
0.321	0.324426	2.14918	0.323649	1.03492	0.147491	0.900944
0.322	0.383573	2.29499	0.381352	1.07909	0.163903	0.943801
0.323	0.445655	2.42076	0.441112	1.11749	0.179741	0.982038
0.324	0.513662	2.52479	0.50515	1.14973	0.19648	1.01531
0.325	0.592256	2.60662	0.576567	1.17527	0.216328	1.04308
0.326	0.686709	2.66635	0.658741	1.19331	0.241648	1.06442
0.327	0.801391	2.70415	0.754305	1.20252	0.274277	1.07742
0.328	0.938662	2.71999	0.864434	1.20036	0.315087	1.07868
0.329	1.09843	2.71321	0.988889	1.18257	0.363841	1.06344
0.33	1.27812	2.68189	1.12643	1.14376	0.419367	1.0267
0.331	1.47312	2.62182	1.27497	1.07902	0.479952	0.964785
0.332	1.67736	2.52575	1.43143	0.98587	0.543732	0.876934
0.333	1.884	2.38406	1.59162	0.865468	0.608924	0.765988
0.334	2.08605	2.18754	1.75054	0.722836	0.673864	0.638082
0.335	2.27707	1.93109	1.90285	0.566028	0.737081	0.50148
0.336	2.45155	1.61664	2.04347	0.404481	0.797403	0.364902
0.337	2.60507	1.25435	2.16808	0.247324	0.853876	0.236002
0.338	2.73444	0.861492	2.27377	0.101986	0.905709	0.120228
0.339	2.83779	0.459544	2.35937	-0.0268416	0.952364	0.0201077
0.34	2.91423	0.070287	2.42515	-0.137613	0.993563	-0.0647617
0.341	2.9636	-0.287644	2.47207	-0.231526	1.0292	-0.137096
0.342	2.98615	-0.601198	2.50114	-0.311648	1.05927	-0.201171
0.343	2.98221	-0.864206	2.51296	-0.381898	1.08384	-0.261764
0.344	2.95196	-1.07758	2.50745	-0.44586	1.10263	-0.322772
0.345	2.89526	-1.24834	2.48306	-0.505861	1.11453	-0.386219
0.346	2.81081	-1.3873	2.43561	-0.562615	1.11692	-0.45198
0.347	2.69466	-1.50608	2.35757	-0.615263	1.10538	-0.517994
0.348	2.53964	-1.61456	2.23909	-0.661809	1.07431	-0.580797
0.349	2.33678	-1.71895	2.07116	-0.699747	1.01862	-0.636317
0.35	2.07867	-1.82079	1.84913	-0.726683	0.935662	-0.680762
0.351	1.76323	-1.91721	1.5753	-0.740839	0.826462	-0.711282
0.352	1.39606	-2.0023	1.25958	-0.741362	0.695857	-0.726271
0.353	0.990533	-2.06884	0.917769	-0.728448	0.551607	-0.725386
0.354	0.565788	-2.1098	0.568427	-0.703255	0.402802	-0.70948
0.355	0.143648	-2.11951	0.229557	-0.667696	0.258187	-0.680522
0.356	-0.254973	-2.09468	-0.0841751	-0.624306	0.124819	-0.641216
0.357	-0.613381	-2.03507	-0.363463	-0.575941	0.00716812	-0.59448
0.358	-0.921281	-1.94335	-0.605304	-0.525246	-0.0931541	-0.543136
0.359	-1.17552	-1.82445	-0.812793	-0.474379	-0.177239	-0.489813
0.36	-1.37959	-1.68472	-0.993589	-0.425035	-0.248391	-0.436913
0.361	-1.54197	-1.53123	-1.15717	-0.378655	-0.311128	-0.386555
0.362	-1.67361	-1.37107	-1.31184	-0.336483	-0.369881	-0.340444
0.363	-1.78509	-1.2109	-1.4626	-0.299331	-0.427907	-0.29972
0.364	-1.88419	-1.05645	-1.61023	-0.267549	-0.486642	-0.264868
0.365	-1.97464	-0.912343	-1.7514	-0.24112	-0.545519	-0.235837
0.366	-2.05587	-0.78186	-1.87942	-0.219684	-0.602316	-0.212272
0.367	-2.12383	-0.666944	-1.98615	-0.202706	-0.653867	-0.19373
0.368	-2.17271	-0.568275	-2.06391	-0.189662	-0.696811	-0.179718
0.369	-2.19679	-0.485561	-2.10678	-0.179984	-0.728206	-0.169615
0.37	-2.19137	-0.417816	-2.11131	-0.173	-0.745965	-0.162677
0.371	-2.15347	-0.3636	-2.07669	-0.168019	-0.749074	-0.158116
0.372	-2.08278	-0.321197	-2.00477	-0.164424	-0.737711	-0.155153
0.373	-1.98186	-0.288764	-1.89998	-0.161606	-0.713213	-0.153071
0.374	-1.85535	-0.264422	-1.76871	-0.159014	-0.677757	-0.151297
0.375	-1.70921	-0.246321	-1.61841	-0.156312	-0.633879	-0.149504
0.376	-1.55022	-0.232678	-1.45666	-0.153284	-0.584269	-0.147542
0.377	-1.38536	-0.221857	-1.29075	-0.14973	-0.531751	-0.145279
0.378	-1.22117	-0.212529	-1.12725	-0.145654	-0.47899	-0.142581
0.379	-1.06328	-0.203767	-0.971773	-0.14121	-0.428156	-0.139378
0.38	-0.916163	-0.195037	-0.828661	-0.136441	-0.380859	-0.135683
0.381	-0.782836	-0.186176	-0.700992	-0.131361	-0.338206	-0.131542
0.382	-0.664938	-0.177236	-0.590501	-0.126099	-0.300883	-0.12709
0.383	-0.563147	-0.168259	-0.497614	-0.120851	-0.269225	-0.122596
0.384	-0.477505	-0.159288	-0.421728	-0.115809	-0.243224	-0.118338
0.385	-0.407382	-0.150528	-0.361496	-0.11116	-0.222523	-0.114485
0.386	-0.351397	-0.142256	-0.314969	-0.107092	-0.206511	-0.111063
0.387	-0.307651	-0.134573	-0.27982	-0.103658	-0.194495	-0.108016
0.388	-0.274076	-0.12742	-0.253697	-0.100706	-0.185774	-0.105276
0.389	-0.248648	-0.120711	-0.23448	-0.0980684	-0.179592	-0.102751
0.39	-0.229451	-0.114397	-0.220389	-0.0957023	-0.175117	-0.100339
0.391	-0.214737	-0.108463	-0.209901	-0.0936151	-0.171569	-0.0979876
0.392	-0.203034	-0.102855	-0.201615	-0.0917586	-0.168385	-0.0956589
0.393	-0.193215	-0.097549	-0.194287	-0.0900528	-0.165301	-0.0933545
0.394	-0.184462	-0.0925702	-0.186983	-0.0884224	-0.162244	-0.0911511
0.395	-0.17618	-0.0878189	-0.179158	-0.086774	-0.159126	-0.0891898
0.396	-0.167924	-0.0832216	-0.170561	-0.0849729	-0.155763	-0.0876176
0.397	-0.159408	-0.0788805	-0.161033	-0.082958	-0.151928	-0.0864008
0.398	-0.150538	-0.0748978	-0.150578	-0.0809018	-0.147511	-0.0853797
0.399	-0.141361	-0.0713422	-0.139523	-0.0790451	-0.142569	-0.0845075
0.4	-0.131955	-0.0682715	-0.128352	-0.077451	-0.137274	-0.0837444
0.401	-0.122363	-0.0656815	-0.117515	-0.0760735	-0.131906	-0.0829064
0.402	-0.112645	-0.0635434	-0.107452	-0.0749239	-0.126787	-0.0818511
0.403	-0.102992	-0.0618302	-0.0986187	-0.0740339	-0.122168	-0.0806302
0.404	-0.093725	-0.0605361	-0.0913934	-0.07331	-0.118138	-0.0793479
0.405	-0.0852025	-0.0597273	-0.0859126	-0.0725785	-0.114629	-0.0780238
0.406	-0.0777369	-0.0594109	-0.0820822	-0.0717282	-0.111519	-0.076638
0.407	-0.0715773	-0.0593767	-0.0797441	-0.0707134	-0.108668	-0.0752243
0.408	-0.0667932	-0.0593905	-0.0786748	-0.0694744	-0.106	-0.0738518
0.409	-0.063266	-0.059417	-0.0785388	-0.0679756	-0.103548	-0.0725172
0.41	-0.0609225	-0.0595236	-0.0789871	-0.0662677	-0.101307	-0.0711522
0.411	-0.059707	-0.0597774	-0.0797558	-0.0643901	-0.0992357	-0.0696713
0.412	-0.0593665	-0.0602435	-0.0806694	-0.0623786	-0.0973158	-0.0679682
0.413	-0.05949	-0.0608952	-0.0815421	-0.0603907	-0.0955168	-0.0660079
0.414	-0.0597123	-0.0614971	-0.0820831	-0.0585975	-0.0938147	-0.0638516
0.415	-0.0598686	-0.0617358	-0.0819299	-0.0570387	-0.0922379	-0.0615606
0.416	-0.0599134	-0.0615287	-0.0809201	-0.0557254	-0.0908435	-0.059235
0.417	-0.0597405	-0.0609963	-0.0792689	-0.0546682	-0.0895698	-0.0570567
0.418	-0.0592713	-0.0602885	-0.0772744	-0.0537888	-0.0882311	-0.0552233
0.419	-0.058644	-0.0595362	-0.0751029	-0.0530089	-0.0867277	-0.0538693
0.42	-0.0580642	-0.0587253	-0.0729097	-0.0523246	-0.0850786	-0.0529961
0.421	-0.057493	-0.057783	-0.0709087	-0.0516963	-0.0833405	-0.0524932
0.422	-0.0567262	-0.0567467	-0.0693118	-0.051047	-0.0815665	-0.0521975
0.423	-0.055644	-0.0556805	-0.0682697	-0.0504461	-0.0797789	-0.0519712
0.424	-0.0542945	-0.0546769	-0.0678857	-0.0500375	-0.0779998	-0.0517592
0.425	-0.0529145	-0.0539475	-0.0681461	-0.0498187	-0.0762331	-0.0514872
0.426	-0.0517106	-0.0536735	-0.0687661	-0.0497234	-0.074472	-0.0510083
0.427	-0.0506381	-0.0538188	-0.0692913	-0.0496761	-0.0727493	-0.0502203
0.428	-0.049562	-0.0542673	-0.0694732	-0.0494799	-0.0710694	-0.0491289
0.429	-0.0484584	-0.0549982	-0.0693877	-0.0489513	-0.0694491	-0.047833
0.43	-0.0473658	-0.0559383	-0.0691502	-0.0481087	-0.0679751	-0.0464722
0.431	-0.0463175	-0.056858	-0.0687078	-0.0470274	-0.0666525	-0.0451389
0.432	-0.0454382	-0.057591	-0.0679077	-0.0456979	-0.0654757	-0.0438469
0.433	-0.0449653	-0.0581492	-0.0666432	-0.0441792	-0.0645087	-0.042576
0.434	-0.0450332	-0.0585901	-0.0648939	-0.0426594	-0.0636871	-0.0413423
0.435	-0.0455021	-0.0589278	-0.0627401	-0.0413073	-0.0628581	-0.0401852
0.436	-0.0461073	-0.0591279	-0.0604104	-0.0402104	-0.0619717	-0.0391311
0.437	-0.0466939	-0.0591342	-0.0582812	-0.0393988	-0.0611403	-0.0381825
0.438	-0.0472238	-0.0589097	-0.0567265	-0.0388468	-0.0605574	-0.0373189
0.439	-0.0477313	-0.0584709	-0.0558634	-0.0384779	-0.0602063	-0.0365971
0.44	-0.0483255	-0.0579064	-0.0555996	-0.0382536	-0.0598482	-0.0361594
0.441	-0.0490684	-0.0573486	-0.0559187	-0.0382206	-0.0593544	-0.036009
0.442	-0.0499005	-0.0568099	-0.0568474	-0.0383343	-0.058697	-0.0359979
0.443	-0.0507735	-0.0561111	-0.058256	-0.0383676	-0.0578284	-0.0361102
0.444	-0.0516988	-0.0551393	-0.059989	-0.0381469	-0.0567977	-0.0364546
0.445	-0.0526244	-0.0539897	-0.0620016	-0.0377118	-0.0557618	-0.0369724
0.446	-0.0534161	-0.0527932	-0.0641968	-0.0371589	-0.0548399	-0.0373677
0.447	-0.0540061	-0.0516275	-0.0664215	-0.0364836	-0.0539943	-0.0373579
0.448	-0.054486	-0.0505755	-0.0686053	-0.0356122	-0.0530814	-0.0368989
0.449	-0.0549972	-0.0496459	-0.0706581	-0.0345188	-0.052007	-0.0361012
0.45	-0.0555321	-0.0488078	-0.0723396	-0.0333225	-0.0507936	-0.0350325
0.451	-0.0559383	-0.0481811	-0.0734186	-0.032217	-0.0495923	-0.0337383
0.452	-0.0561094	-0.0478452	-0.0738614	-0.0312964	-0.0486204	-0.0323772
0.453	-0.0560498	-0.047667	-0.0737626	-0.030563	-0.048011	-0.0311552
0.454	-0.0558347	-0.0475361	-0.0732109	-0.0300171	-0.047745	-0.0301842
0.455	-0.0555156	-0.0474352	-0.0722681	-0.0296981	-0.0476795	-0.0295643
0.456	-0.0550081	-0.047316	-0.0710087	-0.0296441	-0.047595	-0.0294003
0.457	-0.0541829	-0.0470697	-0.0695255	-0.0297748	-0.0473682	-0.0296206
0.458	-0.0530403	-0.0465468	-0.0679843	-0.0299602	-0.0470353	-0.0299675
0.459	-0.0517423	-0.0457724	-0.0666312	-0.0302007	-0.0465823	-0.0301717
0.46	-0.0505034	-0.0450222	-0.0655515	-0.0305244	-0.0459362	-0.0300528
0.461	-0.049514	-0.0444534	-0.0645758	-0.0308127	-0.0450879	-0.029502
0.462	-0.0489016	-0.0439722	-0.0635523	-0.0309085	-0.0440391	-0.0285472
0.463	-0.0486126	-0.0434985	-0.0624674	-0.0307113	-0.0427828	-0.0273832
0.464	-0.0484634	-0.0430662	-0.0612992	-0.0301637	-0.0413539	-0.0261873
0.465	-0.048326	-0.0427455	-0.0600228	-0.0292913	-0.0398534	-0.0250268
0.466	-0.0481673	-0.0425776	-0.0586801	-0.0282161	-0.0384015	-0.0239707
0.467	-0.0480427	-0.0425748	-0.0572671	-0.0271698	-0.0370707	-0.0231142
0.468	-0.0479983	-0.0427954	-0.0557204	-0.0263882	-0.0358996	-0.0224675
0.469	-0.0479124	-0.0432353	-0.054075	-0.0258834	-0.0349252	-0.021975
0.47	-0.0475393	-0.0436789	-0.0524527	-0.0255401	-0.034241	-0.0215679
0.471	-0.0467332	-0.0438862	-0.0509048	-0.025309	-0.0339176	-0.021134
0.472	-0.0456003	-0.0438342	-0.0493883	-0.0250839	-0.0338408	-0.0206381
0.473	-0.0444411	-0.0436318	-0.0478856	-0.0247612	-0.0338076	-0.0201996
0.474	-0.0435421	-0.0432989	-0.0464609	-0.0243838	-0.033679	-0.0199029
0.475	-0.0429636	-0.0428088	-0.0452926	-0.0239722	-0.0334412	-0.0197512
0.476	-0.0425458	-0.0422721	-0.0446197	-0.0234407	-0.0332474	-0.0197743
0.477	-0.0421545	-0.0418846	-0.0445291	-0.02268	-0.033281	-0.019953
0.478	-0.0418163	-0.0417098	-0.0449095	-0.0217024	-0.0335935	-0.0201708
0.479	-0.0415828	-0.0416496	-0.0455518	-0.0207401	-0.0341231	-0.0203036
0.48	-0.0413363	-0.0416048	-0.0462061	-0.020077	-0.0347473	-0.0202753
0.481	-0.0407335	-0.0415325	-0.0466633	-0.0197988	-0.0353738	-0.0201158
0.482	-0.0394914	-0.0413932	-0.0468836	-0.0197985	-0.0359719	-0.0199916
0.483	-0.0377035	-0.0411484	-0.0470021	-0.0199595	-0.0364744	-0.020067
0.484	-0.0357268	-0.0408679	-0.0471529	-0.0201869	-0.0368065	-0.0203675
0.485	-0.0339588	-0.0407367	-0.0472966	-0.020442	-0.0369397	-0.020862
0.486	-0.0326981	-0.0408509	-0.0472729	-0.0208162	-0.0368643	-0.0215627
0.487	-0.0320677	-0.0411298	-0.0470677	-0.021363	-0.0366269	-0.0224691
0.488	-0.0320299	-0.0414392	-0.0468321	-0.0219643	-0.0362873	-0.0234804
0.489	-0.0323634	-0.0416668	-0.046619	-0.0224582	-0.0358287	-0.0244206
0.49	-0.0328191	-0.0416626	-0.0463662	-0.022758	-0.035254	-0.0251615
0.491	-0.0332963	-0.0412415	-0.0460369	-0.0229107	-0.0346861	-0.0256963
0.492	-0.0336945	-0.0403932	-0.0455965	-0.0230941	-0.0343319	-0.0260739
0.493	-0.0338764	-0.0393961	-0.0450036	-0.0234572	-0.0343214	-0.0263067
0.494	-0.0338421	-0.0385746	-0.0442852	-0.0240135	-0.0345448	-0.0263489
0.495	-0.0336658	-0.0380855	-0.0435929	-0.0246683	-0.034752	-0.026142
0.496	-0.033377	-0.0379381	-0.0430933	-0.025295	-0.0348035	-0.0256857
0.497	-0.0330023	-0.0380136	-0.042754	-0.0258336	-0.0346708	-0.025013
0.498	-0.032587	-0.0381209	-0.0424367	-0.0261966	-0.0342668	-0.0241419
0.499	-0.03227	-0.0380852	-0.0421388	-0.0261567	-0.0335839	-0.0231511
0.5	-0.0323116	-0.0378408	-0.0419886	-0.0255893	-0.0328376	-0.0222213
0.501	-0.0327969	-0.0374753	-0.0421303	-0.0246599	-0.032231	-0.0215062
0.502	-0.0334714	-0.037097	-0.0425944	-0.0236414	-0.0318232	-0.0210532
0.503	-0.0340811	-0.0367371	-0.0432505	-0.0226742	-0.0315842	-0.0208662
0.504	-0.0346108	-0.0364254	-0.0439438	-0.0217633	-0.0313881	-0.0208827
0.505	-0.0350806	-0.0362783	-0.0445341	-0.0209842	-0.0311191	-0.0209418
0.506	-0.035417	-0.036383	-0.0448766	-0.0205212	-0.0307979	-0.0209694
0.507	-0.0355875	-0.0366243	-0.0449678	-0.0204812	-0.0305274	-0.0210698
0.508	-0.035656	-0.0368171	-0.04493	-0.0208244	-0.0304027	-0.0213382
0.509	-0.0356205	-0.0369239	-0.0447838	-0.021396	-0.0304723	-0.0217372
0.51	-0.0352993	-0.0369674	-0.0444656	-0.0219517	-0.0307266	-0.0221094
0.511	-0.034553	-0.0368487	-0.0440573	-0.0223063	-0.0310968	-0.0222219
0.512	-0.0335185	-0.0364293	-0.0437421	-0.0224872	-0.0315219	-0.0218762
0.513	-0.0324387	-0.0357522	-0.043568	-0.0225947	-0.0320039	-0.0210401
0.514	-0.0314113	-0.0349385	-0.0435012	-0.022601	-0.0324808	-0.0199075
0.515	-0.0304272	-0.0339276	-0.0435699	-0.022442	-0.0328389	-0.0187808
0.516	-0.0294767	-0.0327005	-0.0437287	-0.0221169	-0.0330994	-0.0178239
0.517	-0.028572	-0.0315222	-0.0438119	-0.0216332	-0.0333583	-0.0170053
0.518	-0.0278082	-0.0306766	-0.0436771	-0.0210051	-0.0336792	-0.0163123
0.519	-0.0273196	-0.0302709	-0.0432586	-0.0203223	-0.0341023	-0.0158072
0.52	-0.027115	-0.0302716	-0.0426249	-0.0197334	-0.0345702	-0.0155246
0.521	-0.0270547	-0.0305396	-0.0419596	-0.0192998	-0.0349725	-0.0155331
0.522	-0.0269467	-0.0309219	-0.0413542	-0.01894	-0.0352685	-0.015937
0.523	-0.0266645	-0.0312684	-0.0407303	-0.0185204	-0.0354847	-0.0166514
0.524	-0.0262299	-0.0313742	-0.0401002	-0.0179544	-0.0356778	-0.0173919
0.525	-0.0257295	-0.031079	-0.0396963	-0.0172733	-0.0357953	-0.0179755
0.526	-0.0252038	-0.0303916	-0.039599	-0.016595	-0.0356397	-0.0183788
0.527	-0.0246828	-0.0294152	-0.0395424	-0.0159791	-0.0350797	-0.0185747
0.528	-0.0242787	-0.0282846	-0.0392923	-0.0154118	-0.0341574	-0.0184948
0.529	-0.0241814	-0.0271925	-0.0388815	-0.0148993	-0.0329984	-0.0180826
0.53	-0.0244862	-0.0263094	-0.0384399	-0.0144165	-0.0317175	-0.0173809
0.531	-0.0250938	-0.0257147	-0.0380214	-0.0138796	-0.0304255	-0.0164898
0.532	-0.0258042	-0.0253851	-0.0375874	-0.0132453	-0.0292718	-0.015472
0.533	-0.0264031	-0.0251543	-0.037089	-0.0125552	-0.0283552	-0.0144272
0.534	-0.0267038	-0.0247525	-0.0365389	-0.0118958	-0.027688	-0.0134918
0.535	-0.0266329	-0.0239909	-0.0360114	-0.0113277	-0.0273471	-0.0127231
0.536	-0.0263026	-0.0229017	-0.0355554	-0.0108917	-0.027415	-0.0120843
0.537	-0.0258448	-0.0216454	-0.0351386	-0.0106274	-0.0277681	-0.0115124
0.538	-0.0252135	-0.020344	-0.0346746	-0.0105204	-0.0281796	-0.0109892
0.539	-0.024319	-0.0189844	-0.0340789	-0.0105113	-0.0285371	-0.0105106
0.54	-0.0231178	-0.0174624	-0.0334048	-0.0105221	-0.028828	-0.0100426
0.541	-0.021516	-0.0158462	-0.0327916	-0.0104788	-0.0290661	-0.00950632
0.542	-0.0195287	-0.0144067	-0.0322567	-0.0103542	-0.0292827	-0.00881876
0.543	-0.0174318	-0.0132867	-0.031767	-0.0100959	-0.0294699	-0.00806802
0.544	-0.0154947	-0.012534	-0.0313358	-0.00960018	-0.0296049	-0.00744504
0.545	-0.0137955	-0.0123264	-0.0309725	-0.00884818	-0.0297126	-0.0069896
0.546	-0.0124087	-0.0127676	-0.0307329	-0.00794084	-0.0297705	-0.00664067
0.547	-0.0115157	-0.0136895	-0.0307206	-0.006996	-0.0296982	-0.00635582
0.548	-0.0112408	-0.0148203	-0.0309456	-0.00608854	-0.0294721	-0.0060846
0.549	-0.0115288	-0.0159502	-0.0312135	-0.00523001	-0.0291537	-0.00574923
0.55	-0.012209	-0.0169118	-0.0312168	-0.00439926	-0.0288509	-0.00526567
0.551	-0.0128964	-0.0175057	-0.0307871	-0.00359684	-0.0285926	-0.00463148
0.552	-0.0129633	-0.0174807	-0.0299693	-0.00285262	-0.0282358	-0.00392467
0.553	-0.0120396	-0.0166948	-0.0288552	-0.00225095	-0.0276222	-0.00318708
0.554	-0.0102532	-0.0153151	-0.0274852	-0.00189056	-0.0267387	-0.00242898
0.555	-0.00797003	-0.0137714	-0.0259289	-0.00177762	-0.0256354	-0.00166513
0.556	-0.00566361	-0.0124279	-0.0243657	-0.00184409	-0.0243495	-0.000881215
0.557	-0.00373103	-0.0113902	-0.0230942	-0.00199849	-0.0229703	-4.9915e-05
0.558	-0.00236324	-0.0107343	-0.0224039	-0.00207334	-0.021693	0.000795504
0.559	-0.00166542	-0.0106415	-0.0223864	-0.00188883	-0.0206855	0.00150507
0.56	-0.0016194	-0.0112306	-0.0229376	-0.00141067	-0.0199281	0.00189377
0.561	-0.00200319	-0.0124408	-0.0238422	-0.000730361	-0.019313	0.00190111
0.562	-0.00255429	-0.0141093	-0.0248878	4.19225e-05	-0.0188331	0.00160519
0.563	-0.00313465	-0.0160863	-0.0259917	0.000828338	-0.0185996	0.00113962
0.564	-0.00371616	-0.0182302	-0.0270546	0.0015821	-0.0186585	0.000668236
0.565	-0.00434776	-0.0204784	-0.0277605	0.00225784	-0.0189233	0.000348989
0.566	-0.00514119	-0.0228793	-0.0277556	0.00278568	-0.0193291	0.000234358
0.567	-0.0061969	-0.0254118	-0.0269435	0.00311765	-0.01982	0.000253499
0.568	-0.00747529	-0.0278775	-0.0254783	0.00328757	-0.020255	0.000320703
0.569	-0.00875532	-0.0299601	-0.023564	0.00334609	-0.0204827	0.00046356
0.57	-0.00987103	-0.0314357	-0.021377	0.00331537	-0.0204045	0.000749696
0.571	-0.0108338	-0.0323104	-0.0191356	0.00324577	-0.0199483	0.001119
0.572	-0.011563	-0.0326663	-0.0171447	0.00321157	-0.0190817	0.00147909
0.573	-0.0118346	-0.0325685	-0.0156154	0.00325939	-0.0179075	0.00182541
0.574	-0.0115849	-0.0321112	-0.0144934	0.00340187	-0.0166263	0.00222689
0.575	-0.0109963	-0.0313519	-0.0137022	0.00361858	-0.015367	0.00273669
0.576	-0.010288	-0.0302909	-0.0133928	0.0039021	-0.0142022	0.00324591
0.577	-0.00950565	-0.0289494	-0.0137796	0.00428458	-0.0132402	0.00359997
0.578	-0.00855784	-0.0274296	-0.0148594	0.00476093	-0.0125558	0.00383268
0.579	-0.00742536	-0.0259524	-0.0163308	0.00525674	-0.012145	0.0040801
0.58	-0.00617869	-0.0247227	-0.0178323	0.00569245	-0.0119894	0.0043995
0.581	-0.00488856	-0.0237858	-0.0192176	0.00606066	-0.0120929	0.00484116
0.582	-0.00362837	-0.0231111	-0.0204845	0.00636906	-0.0124642	0.00551959
0.583	-0.00246603	-0.0226588	-0.0215632	0.00654142	-0.0130747	0.00646652
0.584	-0.00144777	-0.0223108	-0.0223173	0.00654047	-0.0137887	0.00755207
0.585	-0.000668821	-0.0219613	-0.022704	0.00644728	-0.0143891	0.0086116
0.586	-0.000317032	-0.0217138	-0.0228888	0.00627157	-0.0147802	0.0095623
0.587	-0.000542624	-0.0217444	-0.0230863	0.0059562	-0.0149967	0.0103896
0.588	-0.00133139	-0.0220386	-0.0233229	0.0056335	-0.0150202	0.0110944
0.589	-0.00247819	-0.022358	-0.0235761	0.00558173	-0.0148739	0.0116662
0.59	-0.00361072	-0.0223656	-0.0238776	0.00595793	-0.0147143	0.012056
0.591	-0.00441055	-0.0218684	-0.0241458	0.00669064	-0.0146304	0.0121943
0.592	-0.00486379	-0.02091	-0.0242802	0.00757709	-0.0145762	0.0120415
0.593	-0.00511002	-0.0195829	-0.0243344	0.00850506	-0.0145136	0.0115492
0.594	-0.00517186	-0.0179876	-0.0244132	0.0095317	-0.0143804	0.0106712
0.595	-0.0050146	-0.016328	-0.0244783	0.0106762	-0.0140381	0.00949971
0.596	-0.00466406	-0.0147635	-0.0243807	0.0117549	-0.0134528	0.00826487
0.597	-0.00414967	-0.0132695	-0.024139	0.0125506	-0.0127672	0.00715218
0.598	-0.00351741	-0.0117878	-0.0239396	0.0130081	-0.0121309	0.00618845
0.599	-0.00289616	-0.0103682	-0.0238805	0.0131698	-0.0115838	0.00532743
0.6	-0.00239324	-0.00915398	-0.0238745	0.0131203	-0.0110774	0.00452111
0.601	-0.00199131	-0.00831424	-0.0236799	0.0129897	-0.0105628	0.00368878
0.602	-0.00155501	-0.00787465	-0.0231021	0.0128684	-0.0100417	0.00272541
0.603	-0.000908926	-0.00756515	-0.0221947	0.0127471	-0.00955387	0.0015671
0.604	4.41018e-06	-0.00703968	-0.0211738	0.0125424	-0.00917149	0.000258833
0.605	0.00108453	-0.00624774	-0.0202301	0.0122037	-0.00890925	-0.00110276
0.606	0.00224153	-0.00533485	-0.0194027	0.0117745	-0.00863191	-0.00245334
0.607	0.0034753	-0.00436056	-0.0185905	0.0113109	-0.00820952	-0.00376948
0.608	0.00468407	-0.00342063	-0.0177674	0.0108362	-0.00770195	-0.00501282
0.609	0.00557119	-0.00277887	-0.0170879	0.0103493	-0.00725295	-0.00595934
0.61	0.00587607	-0.00263894	-0.0167043	0.00988848	-0.00688243	-0.00630852
0.611	0.0056201	-0.00299311	-0.0166336	0.00964374	-0.00649191	-0.00601351
0.612	0.00513247	-0.00377353	-0.0168035	0.00979237	-0.00601862	-0.0052169
0.613	0.0048155	-0.00496087	-0.017143	0.0102652	-0.00549926	-0.004088
0.614	0.00478635	-0.00647721	-0.0176684	0.0109042	-0.00497162	-0.00290235
0.615	0.00482188	-0.00812036	-0.0184472	0.0116141	-0.00441009	-0.00195245
0.616	0.00464612	-0.00975342	-0.0194816	0.0122774	-0.0038297	-0.00130665
0.617	0.00411895	-0.0114405	-0.0206514	0.0128263	-0.00339106	-0.000849743
0.618	0.00329187	-0.0131953	-0.0217146	0.013279	-0.00330359	-0.000498203
0.619	0.00238109	-0.0147869	-0.0224211	0.0135628	-0.00358175	-0.000135064
0.62	0.00154885	-0.016048	-0.0226034	0.0135666	-0.00403718	0.000542992
0.621	0.000790469	-0.0171301	-0.0221831	0.013269	-0.00452781	0.00175733
0.622	0.00010371	-0.0181978	-0.0212097	0.0126654	-0.00506164	0.00337761
0.623	-0.000388201	-0.0191644	-0.0198175	0.011827	-0.00567639	0.00508711
0.624	-0.000516408	-0.0199678	-0.0182113	0.0110203	-0.00631161	0.00663243
0.625	-0.000192812	-0.0206816	-0.0166878	0.0105673	-0.00681425	0.00795735
0.626	0.000520442	-0.0212481	-0.0154808	0.0105914	-0.00702419	0.00915647
0.627	0.00150646	-0.0216138	-0.014663	0.0110046	-0.00688711	0.0102767
0.628	0.00275787	-0.0219352	-0.0142987	0.011698	-0.00653115	0.0112722
0.629	0.0042429	-0.0222863	-0.0144803	0.0125896	-0.00616562	0.0120496
0.63	0.00565717	-0.0225286	-0.0151828	0.0135881	-0.00587105	0.0124746
0.631	0.00665303	-0.0225381	-0.0162768	0.0145668	-0.00558785	0.0124432
0.632	0.00721542	-0.0223023	-0.0175747	0.0152834	-0.00531889	0.0119292
0.633	0.00746664	-0.0218677	-0.0188528	0.0154761	-0.00516602	0.011025
0.634	0.00735281	-0.0212517	-0.0199759	0.0151051	-0.0051787	0.00990876
0.635	0.00678635	-0.0204433	-0.0209263	0.0143592	-0.0052831	0.00868552
0.636	0.00580587	-0.0195069	-0.0217104	0.0134733	-0.0053624	0.00738002
0.637	0.00455108	-0.0185493	-0.0223064	0.0125822	-0.00539659	0.00603573
0.638	0.00328052	-0.0176448	-0.0227031	0.0116682	-0.00547262	0.00469372
0.639	0.00222612	-0.0168393	-0.0229565	0.0106354	-0.00568103	0.00332541
0.64	0.00139952	-0.0161406	-0.0230989	0.00945431	-0.00602519	0.00193242
0.641	0.000769511	-0.0154991	-0.023063	0.00823781	-0.00641413	0.000673061
0.642	0.000381453	-0.0148662	-0.0228231	0.00716755	-0.00674749	-0.000294471
0.643	0.000206323	-0.0142921	-0.0224688	0.00638221	-0.00698639	-0.000961985
0.644	0.000163423	-0.013835	-0.0221046	0.00596862	-0.00712104	-0.0013427
0.645	0.000211447	-0.0134208	-0.0217516	0.00595829	-0.00710545	-0.00144026
0.646	0.000318741	-0.0129364	-0.0212874	0.00631019	-0.00691733	-0.00133681
0.647	0.00039891	-0.0122945	-0.0206098	0.00691964	-0.00657611	-0.00108339
0.648	0.000315477	-0.0114475	-0.0198788	0.00761196	-0.00609484	-0.000685271
0.649	3.4585e-05	-0.0105506	-0.0193293	0.00824483	-0.00555481	-0.000207201
0.65	-0.000343734	-0.0098946	-0.0189783	0.0088097	-0.00506401	0.000301881
0.651	-0.000733273	-0.00965771	-0.0187832	0.00936455	-0.00461449	0.000818416
0.652	-0.00111085	-0.00982831	-0.0187935	0.00994719	-0.00413305	0.00127258
0.653	-0.00151237	-0.0102343	-0.0189373	0.010494	-0.00365157	0.00159187
0.654	-0.00197394	-0.0107207	-0.0190443	0.0108415	-0.00337542	0.00177064
0.655	-0.00241844	-0.0111757	-0.0191335	0.010914	-0.00349597	0.00187238
0.656	-0.00263437	-0.0113747	-0.0192891	0.0107991	-0.00394064	0.00195734
0.657	-0.00243162	-0.0112132	-0.0194032	0.0106265	-0.00442111	0.00210588
0.658	-0.00191418	-0.0108985	-0.0193657	0.0104588	-0.00472001	0.00254074
0.659	-0.00135423	-0.0106131	-0.019302	0.0102806	-0.00483523	0.00353481
0.66	-0.000815642	-0.0103202	-0.0193649	0.0101927	-0.00484681	0.00515335
0.661	-0.000238605	-0.00993053	-0.0194771	0.0105119	-0.00478151	0.0071912
0.662	0.000397517	-0.009437	-0.0195252	0.0114552	-0.00461003	0.00936161
0.663	0.0011696	-0.00897953	-0.0196152	0.0128512	-0.00425757	0.0114327
0.664	0.0021931	-0.00876012	-0.0198735	0.0142936	-0.00368735	0.0131801
0.665	0.00351612	-0.00891095	-0.0202277	0.0154862	-0.00296666	0.0144653
0.666	0.00503414	-0.0094711	-0.0205887	0.0163805	-0.00214987	0.0154206
0.667	0.00646021	-0.0104043	-0.0209699	0.0170442	-0.00121284	0.0163309
0.668	0.00750655	-0.0116266	-0.0213669	0.0175437	-0.000169621	0.0172697
0.669	0.00808017	-0.0129745	-0.0217329	0.0179287	0.000782457	0.0180108
0.67	0.00823741	-0.0142426	-0.0220089	0.0181729	0.00135137	0.0183064
0.671	0.00804226	-0.0152364	-0.0221178	0.0181945	0.0014239	0.0180043
0.672	0.00748479	-0.0157743	-0.0220237	0.0179611	0.00110472	0.016978
0.673	0.00653289	-0.0157751	-0.0218035	0.0174765	0.000554032	0.0152263
0.674	0.005289	-0.0153199	-0.0216273	0.0167697	-7.6802e-05	0.0129496
0.675	0.00397551	-0.0146162	-0.0216465	0.0159687	-0.000615353	0.0104484
0.676	0.00274322	-0.0138646	-0.0218263	0.0151915	-0.000918138	0.00802604
0.677	0.00161614	-0.0131996	-0.021912	0.0143788	-0.000933574	0.00594133
0.678	0.000567288	-0.0127039	-0.0216272	0.013416	-0.00069105	0.00432362
0.679	-0.000448201	-0.0123177	-0.0209147	0.0123324	-0.000331521	0.00317938
0.68	-0.00145732	-0.0119519	-0.0200177	0.0112995	-6.1163e-05	0.00249324
0.681	-0.00235219	-0.0117567	-0.0192219	0.0104626	-1.34655e-05	0.00222594
0.682	-0.00288916	-0.0120483	-0.0185439	0.00985519	-0.000197317	0.00232479
0.683	-0.00293007	-0.0129779	-0.0178521	0.00945591	-0.000574588	0.00274704
0.684	-0.0025744	-0.0144374	-0.0171127	0.00923468	-0.00113448	0.00337593
0.685	-0.00201801	-0.016249	-0.0164163	0.00923047	-0.00184472	0.00401461
0.686	-0.00136815	-0.0182582	-0.0158954	0.00951977	-0.00262187	0.00452005
0.687	-0.000643098	-0.0202617	-0.0155643	0.0100527	-0.0033465	0.00488517
0.688	5.77191e-05	-0.0219321	-0.0153208	0.0106911	-0.0039195	0.00517201
0.689	0.000561336	-0.0229203	-0.0151594	0.0113139	-0.00431742	0.0054212
0.69	0.000805398	-0.023202	-0.0151513	0.0118259	-0.00452743	0.00563887
0.691	0.000856207	-0.0231558	-0.0152288	0.0122313	-0.00454097	0.00579057
0.692	0.000796064	-0.023176	-0.0151877	0.0126	-0.00437599	0.00583011
0.693	0.00071834	-0.0233781	-0.0148844	0.012947	-0.00400714	0.0057582
0.694	0.000761809	-0.023654	-0.0143957	0.0132865	-0.00337945	0.00561404
0.695	0.00100881	-0.0239151	-0.0139576	0.0136523	-0.0024651	0.00545745
0.696	0.00139614	-0.0241989	-0.0137506	0.0139838	-0.00131653	0.00534399
0.697	0.0018586	-0.024523	-0.0138482	0.0141388	-0.000104742	0.00538867
0.698	0.00247724	-0.0248136	-0.0142978	0.0140654	0.000990952	0.00589248
0.699	0.00332995	-0.0250109	-0.0150926	0.0138866	0.00185432	0.00713028
0.7	0.0043404	-0.0251094	-0.0160274	0.013823	0.00237943	0.00902471
0.701	0.00537896	-0.02511	-0.0167162	0.0140405	0.00248796	0.0111954
0.702	0.00637097	-0.0250041	-0.0169228	0.014518	0.00216603	0.0132564
0.703	0.00731533	-0.0248039	-0.0166925	0.0151576	0.00153082	0.0150173
0.704	0.00820708	-0.024596	-0.0161062	0.0159887	0.00083084	0.0164245
0.705	0.00890446	-0.0244288	-0.0152096	0.0170409	0.000219611	0.0174904
0.706	0.00926822	-0.0241897	-0.0141301	0.0181428	-0.000314984	0.0182871
0.707	0.00939374	-0.0238303	-0.0130922	0.0190639	-0.000825324	0.0188449
0.708	0.0094828	-0.023464	-0.0122636	0.0197363	-0.00131595	0.0190664
0.709	0.00961977	-0.0230719	-0.0116135	0.0202045	-0.00163286	0.0188181
0.71	0.00976976	-0.02242	-0.011124	0.0204942	-0.00158835	0.0180943
0.711	0.00988682	-0.021294	-0.0109082	0.0206215	-0.00120615	0.0169691
0.712	0.00996299	-0.0197176	-0.0109538	0.0206472	-0.000664007	0.0154737
0.713	0.00999779	-0.0180407	-0.0111662	0.0206685	-0.000138645	0.0136833
0.714	0.0100142	-0.0167347	-0.0116782	0.0206744	0.00029184	0.0118226
0.715	0.0100782	-0.0160563	-0.0126558	0.0205391	0.000647778	0.0101302
0.716	0.0101986	-0.015981	-0.0139395	0.0202401	0.000915935	0.00870161
0.717	0.010196	-0.016324	-0.0152406	0.0198349	0.00105058	0.00753727
0.718	0.00982573	-0.016834	-0.0163837	0.0192745	0.00110133	0.00659182
0.719	0.00912624	-0.0172801	-0.0172633	0.0184929	0.00114164	0.00578186
0.72	0.00841133	-0.0175377	-0.017816	0.0176396	0.00111876	0.0050857
0.721	0.00789613	-0.0175527	-0.0180283	0.0169637	0.000976744	0.00455534
0.722	0.00765426	-0.0172288	-0.0179672	0.0164937	0.000782724	0.00416411
0.723	0.00779708	-0.0164869	-0.0177547	0.0160653	0.00063561	0.0038069
0.724	0.00833971	-0.0153768	-0.0174402	0.0155476	0.000559275	0.0034684
0.725	0.00905391	-0.0140188	-0.017038	0.0149243	0.000506958	0.00326026
0.726	0.00964563	-0.0125346	-0.0166692	0.0142562	0.000455449	0.00330297
0.727	0.0099095	-0.0111141	-0.0163911	0.013586	0.000423019	0.00364061
0.728	0.00972634	-0.0100155	-0.0160511	0.0129265	0.000476645	0.00419737
0.729	0.00910092	-0.00940285	-0.0155438	0.012313	0.000694505	0.0047686
0.73	0.00813945	-0.00933771	-0.0149433	0.0118278	0.0010467	0.00524501
0.731	0.00699184	-0.00989884	-0.0143489	0.0115787	0.0014172	0.00572156
0.732	0.0058856	-0.0110528	-0.0138372	0.0115971	0.00167414	0.0062857
0.733	0.00505411	-0.0125423	-0.0135017	0.0118373	0.00177148	0.00695537
0.734	0.0045226	-0.014062	-0.0133537	0.012258	0.00177781	0.00768824
0.735	0.00417297	-0.0153511	-0.0133149	0.0128439	0.00169377	0.00834395
0.736	0.00399615	-0.0161611	-0.0133406	0.0135987	0.00145996	0.00876179
0.737	0.00398287	-0.0163173	-0.013398	0.0144585	0.00111471	0.0089451
0.738	0.0039957	-0.0158294	-0.0134638	0.0152887	0.000771588	0.00921468
0.739	0.00394663	-0.0148451	-0.013597	0.0159729	0.000557758	0.00996334
0.74	0.00386107	-0.0134774	-0.0138463	0.0164344	0.000580108	0.0112591
0.741	0.00379637	-0.0118476	-0.0140646	0.0167183	0.000855768	0.0128829
0.742	0.00387035	-0.0101598	-0.0139811	0.0169509	0.00128686	0.0145922
0.743	0.00424344	-0.00854754	-0.0135531	0.017186	0.00173497	0.0162324
0.744	0.00495571	-0.00699072	-0.0130286	0.0174465	0.00206947	0.0177037
0.745	0.00584811	-0.00547415	-0.0126606	0.0177537	0.00220626	0.0189196
0.746	0.00669134	-0.00418193	-0.0125823	0.0181017	0.00217206	0.0198106
0.747	0.00735788	-0.00344433	-0.0127682	0.0185218	0.00204556	0.0203298
0.748	0.00783253	-0.00346803	-0.0130355	0.0190518	0.00188029	0.0204606
0.749	0.0081959	-0.00417862	-0.0132775	0.0196331	0.00167319	0.0201846
0.75	0.00857502	-0.00525389	-0.0135455	0.0201735	0.001374	0.0195052
0.751	0.00897485	-0.0063228	-0.013828	0.0206279	0.00100116	0.018472
0.752	0.00926044	-0.00722674	-0.0139993	0.020955	0.000645837	0.0170135
0.753	0.009306	-0.00800077	-0.014011	0.0211202	0.000336554	0.015009
0.754	0.00911651	-0.00865204	-0.0139141	0.0211046	3.03883e-05	0.012592
0.755	0.00881931	-0.00913038	-0.0136638	0.0209193	-0.00026667	0.0101077
0.756	0.0085368	-0.00943244	-0.0131706	0.0206563	-0.000483007	0.00787649
0.757	0.00828697	-0.00952516	-0.012527	0.0204366	-0.000571614	0.0060828
0.758	0.00801065	-0.00928412	-0.0119134	0.0202943	-0.000507873	0.00477414
0.759	0.00772323	-0.00870108	-0.0113769	0.0201702	-0.000252702	0.00392599
0.76	0.00760723	-0.00792726	-0.0108744	0.0199742	0.000190359	0.00346444
0.761	0.00785748	-0.00705355	-0.0104529	0.0195877	0.000757981	0.00325704
0.762	0.00845603	-0.00606605	-0.0102249	0.0189526	0.00142344	0.00323342
0.763	0.00923649	-0.00497343	-0.0101813	0.0181491	0.00218452	0.00337991
0.764	0.0100788	-0.00386042	-0.0102049	0.0172869	0.00297626	0.00360014
0.765	0.0108801	-0.00280436	-0.0103088	0.0164304	0.00366408	0.00380934
0.766	0.0115099	-0.00184844	-0.0106673	0.0156326	0.00408214	0.00397747
0.767	0.0118889	-0.0011129	-0.0112791	0.0149694	0.00417624	0.00408284
0.768	0.011996	-0.000770928	-0.0118404	0.0145006	0.00406241	0.00415683
0.769	0.0117952	-0.000814156	-0.0121094	0.0141946	0.00384045	0.00425556
0.77	0.0112434	-0.00103752	-0.0121199	0.0139349	0.00349825	0.00442544
0.771	0.0103999	-0.00134307	-0.011954	0.0136407	0.00308304	0.00463332
0.772	0.00952118	-0.00177868	-0.0115686	0.0133582	0.00272067	0.00477408
0.773	0.00896096	-0.00222402	-0.0109422	0.0131537	0.00240921	0.00487511
0.774	0.0088811	-0.00230438	-0.0102473	0.0129275	0.00211477	0.00511277
0.775	0.00922734	-0.0018308	-0.00970034	0.0125352	0.00194569	0.0055828
0.776	0.00988685	-0.00106529	-0.00932458	0.0121048	0.00196879	0.00619793
0.777	0.0106535	-0.00031883	-0.00904408	0.0119559	0.00211196	0.00684837
0.778	0.0113447	0.000298543	-0.00889333	0.0122315	0.00229516	0.00767001
0.779	0.0120163	0.000771972	-0.00892839	0.0128073	0.00244403	0.00905116
0.78	0.0127479	0.00110198	-0.0090683	0.0135524	0.00249431	0.0112424
0.781	0.0134126	0.00125252	-0.00923784	0.0145565	0.00247565	0.0141468
0.782	0.0139109	0.00124729	-0.00945184	0.0159381	0.00247998	0.0174683
0.783	0.014278	0.00123075	-0.00970353	0.017589	0.00250873	0.0208309
0.784	0.0144387	0.00132601	-0.00995994	0.0193067	0.00242209	0.0238849
0.785	0.0141553	0.00154434	-0.0101046	0.0209127	0.00210784	0.0263706
0.786	0.0133126	0.00187382	-0.00991383	0.0222637	0.00159963	0.0281281
0.787	0.0121065	0.00232974	-0.00931443	0.0233052	0.000990215	0.0291113
0.788	0.0108586	0.00281144	-0.00854325	0.0239924	0.000375169	0.0293773
0.789	0.00982621	0.00312516	-0.00792612	0.0243002	-0.000127937	0.0290728
0.79	0.00918551	0.00323856	-0.00761886	0.0243293	-0.000408281	0.0282971
0.791	0.00894422	0.00319573	-0.00759589	0.0242588	-0.00043781	0.0269629
0.792	0.00899917	0.00290925	-0.0077652	0.0242101	-0.000286412	0.0249491
0.793	0.00933179	0.00234997	-0.00802952	0.0241464	2.98136e-06	0.0223592
0.794	0.00997935	0.00168131	-0.00830709	0.0239149	0.000456061	0.0195076
0.795	0.010871	0.00104264	-0.00854989	0.0233553	0.00101331	0.0167112
0.796	0.0117641	0.000456114	-0.00877202	0.0223582	0.00150165	0.0141664
0.797	0.0124163	1.76195e-05	-0.00910785	0.0209364	0.00179741	0.0119694
0.798	0.0128157	-0.000120843	-0.00969808	0.0192683	0.00189082	0.0101683
0.799	0.0131433	-1.16263e-05	-0.0104884	0.0176054	0.00184609	0.0087548
0.8	0.0134789	0.00010427	-0.0112715	0.0161048	0.00177611	0.00765702
0.801	0.0136532	6.54906e-05	-0.0118464	0.0148185	0.00183461	0.00677533
0.802	0.0135309	-9.23789e-05	-0.012128	0.0138492	0.00220283	0.0060074
0.803	0.0132269	-0.000290078	-0.0121521	0.0133307	0.00295279	0.00527912
0.804	0.0129041	-0.00052348	-0.0119867	0.0132525	0.00395426	0.00461428
0.805	0.0126073	-0.000724781	-0.0116863	0.013422	0.00500329	0.004121
0.806	0.0123528	-0.000732032	-0.0112607	0.0136367	0.00599017	0.0038673
0.807	0.0121863	-0.000518281	-0.010764	0.0138998	0.00691957	0.00384078
0.808	0.0120689	-0.000177777	-0.0103606	0.0143515	0.00778015	0.00404177
0.809	0.011865	0.000310348	-0.0100941	0.0150123	0.00853676	0.00452004
0.81	0.0115116	0.000992441	-0.009765	0.0157275	0.00918932	0.00526099
0.811	0.0110146	0.00173305	-0.00917981	0.0163947	0.00973667	0.00614518
0.812	0.0104043	0.00236859	-0.00843504	0.0170834	0.0101834	0.00703973
0.813	0.00980005	0.00289637	-0.00782392	0.0178337	0.010524	0.00780747
0.814	0.00925647	0.00326185	-0.00753922	0.0185602	0.01074	0.0083415
0.815	0.00864454	0.00321313	-0.00763133	0.0191261	0.0107888	0.00866683
0.816	0.00784519	0.00261407	-0.00802985	0.0194082	0.0105843	0.00887641
0.817	0.00687208	0.00165751	-0.00850278	0.0193652	0.0101308	0.00899723
0.818	0.00577847	0.000638288	-0.00880228	0.01902	0.00951139	0.00901588
0.819	0.0046269	-0.000269427	-0.0088794	0.0184039	0.00876281	0.0089755
0.82	0.0036218	-0.000937403	-0.00878058	0.0176731	0.00795041	0.00904084
0.821	0.00306377	-0.00125148	-0.00841253	0.0172163	0.00718811	0.00953857
0.822	0.0030839	-0.00119501	-0.00771507	0.0173578	0.00654375	0.0107573
0.823	0.00358124	-0.000854731	-0.00687182	0.0180646	0.00602292	0.0126401
0.824	0.00436715	-0.00040414	-0.00609352	0.0191194	0.00560926	0.0148687
0.825	0.00528043	4.65057e-05	-0.00542407	0.0203389	0.00527074	0.0171272
0.826	0.00622651	0.000527775	-0.0048655	0.0215972	0.00497698	0.019184
0.827	0.00716565	0.00101111	-0.00444276	0.022841	0.00477903	0.0209394
0.828	0.00806693	0.00138491	-0.00410893	0.024015	0.00471051	0.0223884
0.829	0.00887964	0.00165866	-0.00377939	0.0249539	0.00470698	0.0234919
0.83	0.00955883	0.00197377	-0.00339775	0.025454	0.0047698	0.0242018
0.831	0.0100902	0.00237784	-0.00300155	0.0254139	0.00495204	0.0245478
0.832	0.0105144	0.00271237	-0.00279914	0.0249051	0.00524686	0.0246198
0.833	0.0108945	0.00283557	-0.00297225	0.0241293	0.00563229	0.024453
0.834	0.0112761	0.00283425	-0.00340788	0.0232662	0.00606811	0.0239507
0.835	0.0116559	0.00283417	-0.00385643	0.0223545	0.00647912	0.0229782
0.836	0.0119422	0.00275808	-0.00431322	0.0213576	0.00685232	0.0215127
0.837	0.0120702	0.00245505	-0.00494871	0.0203204	0.00723633	0.0196498
0.838	0.012094	0.00191194	-0.0057446	0.0193697	0.00761343	0.0175078
0.839	0.0121036	0.00121469	-0.00657725	0.0185578	0.00791837	0.0151703
0.84	0.0121304	0.000490283	-0.00751166	0.0178313	0.00813019	0.0126886
0.841	0.0121548	-3.29475e-05	-0.00868736	0.0171709	0.00822319	0.0101817
0.842	0.0121883	-0.000148818	-0.0100154	0.0166649	0.0081422	0.00786668
0.843	0.0122719	0.000118928	-0.0112089	0.0163846	0.00795703	0.00592388
0.844	0.0124336	0.000588974	-0.0120982	0.0162109	0.00785978	0.0044256
0.845	0.012733	0.00115991	-0.0127463	0.0159632	0.0079652	0.00339991
0.846	0.0132096	0.00185801	-0.0132598	0.0156312	0.00830091	0.00284768
0.847	0.0137239	0.00263809	-0.0136239	0.0153096	0.008828	0.00265557
0.848	0.014048	0.00325127	-0.0138056	0.0150772	0.00943975	0.0026786
0.849	0.0140051	0.00341097	-0.0138815	0.0149987	0.0101129	0.00292452
0.85	0.0134703	0.00305904	-0.0138385	0.0150675	0.0108775	0.00345035
0.851	0.0124926	0.00231922	-0.0134245	0.0152032	0.0116459	0.00415157
0.852	0.0113099	0.00128614	-0.0124503	0.0153287	0.0122532	0.00485883
0.853	0.0102292	7.736e-05	-0.0111241	0.0153351	0.0125677	0.00550173
0.854	0.00954711	-0.0011375	-0.00988571	0.0151285	0.01257	0.00599596
0.855	0.00938717	-0.00229826	-0.00892337	0.0147849	0.0123915	0.00618711
0.856	0.00964876	-0.00336807	-0.00808599	0.014456	0.0121711	0.00603681
0.857	0.0101379	-0.00413015	-0.00725515	0.0141544	0.0119124	0.00573663
0.858	0.010643	-0.00433421	-0.00650438	0.0138826	0.011573	0.00556702
0.859	0.0110005	-0.00397664	-0.00589786	0.0138732	0.0111713	0.00567831
0.86	0.0112238	-0.00325766	-0.00539054	0.014429	0.0107864	0.00602514
0.861	0.0114584	-0.00232336	-0.00500481	0.0156515	0.0105373	0.00645494
0.862	0.0117784	-0.00120983	-0.00490023	0.0174249	0.0104822	0.00685064
0.863	0.0122191	-4.71807e-06	-0.00520745	0.0194835	0.0105531	0.00729674
0.864	0.0128688	0.0010869	-0.00589642	0.0215075	0.0106734	0.00821982
0.865	0.0136574	0.00190528	-0.00673973	0.0232918	0.0108443	0.0101341
0.866	0.0143629	0.0024276	-0.00744311	0.0247996	0.0110078	0.0131092
0.867	0.0149211	0.00260674	-0.007871	0.0260503	0.0109862	0.0167009
0.868	0.015338	0.00230096	-0.00803756	0.0270306	0.0107067	0.0202884
0.869	0.0154895	0.00145195	-0.00796691	0.0276916	0.0102827	0.0233371
0.87	0.0153419	0.000221238	-0.00772028	0.0280092	0.00982574	0.0255791
0.871	0.0150909	-0.00110706	-0.00747044	0.028028	0.00938092	0.027058
0.872	0.0148713	-0.00228984	-0.00739678	0.027793	0.00898079	0.0278987
0.873	0.0145748	-0.00322317	-0.0075284	0.0272608	0.0086238	0.0281456
0.874	0.0140837	-0.00396712	-0.00782422	0.0263611	0.00828574	0.0278966
0.875	0.0134465	-0.00463576	-0.00828138	0.0251304	0.00797378	0.0273651
0.876	0.0127755	-0.00525492	-0.00888078	0.0237095	0.00775452	0.0267113
0.877	0.0121724	-0.00581955	-0.00960135	0.0222427	0.00778891	0.0259119
0.878	0.011737	-0.00645786	-0.0103988	0.0207956	0.00819776	0.0248595
0.879	0.0114987	-0.00729455	-0.0112134	0.0193894	0.0089263	0.0235372
0.88	0.0113487	-0.00821322	-0.0121324	0.0181438	0.00985587	0.0220141
0.881	0.0111248	-0.00899406	-0.0132925	0.017248	0.0108046	0.0203819
0.882	0.0107631	-0.00956488	-0.0146145	0.0167208	0.0115513	0.0187124
0.883	0.0103047	-0.00999836	-0.0158933	0.016339	0.0120659	0.0170027
0.884	0.00985039	-0.0103822	-0.0170326	0.0159325	0.012455	0.0152446
0.885	0.00951552	-0.0107647	-0.0179886	0.0155714	0.0127242	0.013492
0.886	0.00931622	-0.0111109	-0.0187366	0.0153209	0.0127868	0.011821
0.887	0.0091994	-0.0113034	-0.019433	0.0151106	0.0125749	0.0103329
0.888	0.00912103	-0.0112994	-0.0203106	0.0149322	0.0120649	0.00915076
0.889	0.00905062	-0.0110881	-0.0213673	0.0148511	0.0113257	0.00835553
0.89	0.00902789	-0.0105008	-0.022306	0.0148393	0.0105416	0.00793822
0.891	0.00916776	-0.00941991	-0.0228222	0.0148173	0.00986468	0.00781215
0.892	0.00954684	-0.00796657	-0.0228879	0.0147301	0.00934734	0.00788008
0.893	0.0101205	-0.00635201	-0.0227131	0.0145444	0.00903758	0.0080441
0.894	0.0107961	-0.0047699	-0.0225572	0.0143338	0.00896228	0.00824642
0.895	0.0115131	-0.00333717	-0.022581	0.0142641	0.00908003	0.00850554
0.896	0.0121842	-0.00209215	-0.0227719	0.0144169	0.00932528	0.00880653
0.897	0.012672	-0.0010773	-0.0229667	0.0147469	0.00959598	0.00912885
0.898	0.0128544	-0.000399995	-0.0229775	0.0152133	0.00973951	0.00953244
0.899	0.0126292	-0.000194658	-0.0226849	0.0158314	0.00970324	0.010051
0.9	0.0119876	-0.000437026	-0.022069	0.0165785	0.00957655	0.0106049
0.901	0.0111287	-0.000878384	-0.0211957	0.0173929	0.00938522	0.0111045
0.902	0.0103482	-0.00123488	-0.0200664	0.0183579	0.0090527	0.0116012
0.903	0.00979586	-0.00132543	-0.0186539	0.0197261	0.00855026	0.012248
0.904	0.00941552	-0.00108374	-0.0171586	0.0216899	0.00793777	0.0131759
0.905	0.00916283	-0.000554461	-0.0159805	0.024189	0.00730936	0.0144654
0.906	0.00917269	0.000191304	-0.0154164	0.0268764	0.00674289	0.0161248
0.907	0.00955143	0.00111725	-0.0154329	0.0292844	0.00633628	0.0180298
0.908	0.0101162	0.00212876	-0.0157452	0.0310829	0.00618488	0.0198893
0.909	0.0105764	0.00304083	-0.0161253	0.0322034	0.00626054	0.0213783
0.91	0.0108807	0.0037768	-0.016537	0.0326969	0.00651592	0.0223875
0.911	0.0111152	0.00450934	-0.0170249	0.0325455	0.00696953	0.0230624
0.912	0.0112671	0.00543931	-0.0176246	0.0317415	0.00756075	0.0236132
0.913	0.0113445	0.0065405	-0.0183589	0.0304207	0.00820661	0.0241446
0.914	0.0114413	0.00767282	-0.0191866	0.0288183	0.00890339	0.0246584
0.915	0.0115396	0.00875344	-0.0199358	0.0271198	0.0095744	0.0251053
0.916	0.0114984	0.00963157	-0.0203825	0.025432	0.010056	0.0253507
0.917	0.0112734	0.010053	-0.0204272	0.0239344	0.0102791	0.0252558
0.918	0.0109597	0.00999338	-0.02014	0.0228126	0.010318	0.0247506
0.919	0.0106455	0.00973113	-0.019606	0.0220744	0.0102803	0.0238168
0.92	0.0103777	0.00944046	-0.0188275	0.0216598	0.010205	0.0225352
0.921	0.0102035	0.0090326	-0.0178088	0.0215545	0.0100938	0.0210068
0.922	0.0101541	0.00836006	-0.0165748	0.0217413	0.0099883	0.0192915
0.923	0.0102304	0.00739563	-0.0151226	0.0221636	0.00994544	0.0174897
0.924	0.0103884	0.00636376	-0.0134844	0.0227053	0.0099623	0.0156972
0.925	0.0104902	0.00566427	-0.0117548	0.0232688	0.00998087	0.0139018
0.926	0.0103682	0.00552929	-0.0100517	0.0238378	0.00994007	0.0121023
0.927	0.00998802	0.00587648	-0.00848444	0.0244339	0.00984221	0.0104288
0.928	0.00943065	0.00650773	-0.00707416	0.0250659	0.00975755	0.00903518
0.929	0.00878327	0.00724626	-0.00572904	0.0257376	0.00971627	0.00808276
0.93	0.0081711	0.00794057	-0.00437465	0.0265112	0.00970001	0.00779726
0.931	0.00772191	0.00849253	-0.00309635	0.0273992	0.00968492	0.00837425
0.932	0.00748476	0.00884894	-0.00208079	0.0282062	0.0096585	0.00986199
0.933	0.00746633	0.0089959	-0.00137847	0.028632	0.00964578	0.0121141
0.934	0.00762269	0.0089619	-0.000850041	0.0284957	0.00968069	0.014857
0.935	0.00780358	0.00872821	-0.00040277	0.027839	0.00979988	0.0177855
0.936	0.00778862	0.00819907	-5.6905e-05	0.0268211	0.010005	0.0205597
0.937	0.00746886	0.00737929	0.000271045	0.0255549	0.0102438	0.0229367
0.938	0.00689757	0.00647362	0.000819692	0.0241521	0.0104967	0.0249516
0.939	0.00614288	0.00576387	0.00175106	0.0228116	0.0107863	0.0267511
0.94	0.00538663	0.00548974	0.00296372	0.021721	0.0111238	0.0283817
0.941	0.00502394	0.00573746	0.00415306	0.0209608	0.0114901	0.0297869
0.942	0.00532375	0.00637346	0.00499597	0.0204878	0.0118476	0.030772
0.943	0.00618156	0.0071525	0.00528859	0.0201735	0.012199	0.031075
0.944	0.0073248	0.00786984	0.00507478	0.0199099	0.0126083	0.030649
0.945	0.00847332	0.00842299	0.00468739	0.0196386	0.0130888	0.0297579
0.946	0.00929564	0.00878888	0.00443929	0.0193434	0.0135861	0.0288362
0.947	0.00950738	0.00903106	0.00436946	0.019092	0.0140944	0.0283138
0.948	0.00908261	0.00923134	0.00444669	0.0189722	0.0145862	0.0283854
0.949	0.00826195	0.00933087	0.00472878	0.0189936	0.0149825	0.0289397
0.95	0.00733075	0.00920252	0.00528614	0.0191454	0.0152632	0.0297106
0.951	0.00650684	0.00882713	0.00613577	0.0194376	0.0153862	0.0303762
0.952	0.00602156	0.00826603	0.00715376	0.0198464	0.0151998	0.0306609
0.953	0.0060005	0.00757145	0.00806543	0.02033	0.0146212	0.0304849
0.954	0.00627489	0.00684218	0.00864768	0.0208339	0.0137614	0.0299714
0.955	0.00659795	0.00622623	0.00890501	0.0212739	0.0127926	0.0293174
0.956	0.00690927	0.00581242	0.00895887	0.0215707	0.0118288	0.0286729
0.957	0.00727075	0.00557129	0.00884098	0.0216906	0.0109118	0.0280758
0.958	0.00771494	0.00534026	0.00854242	0.0217143	0.0100971	0.027447
0.959	0.00809744	0.00497403	0.0081451	0.0217562	0.00955603	0.0266705
0.96	0.00814145	0.00454756	0.00770405	0.0218222	0.00944038	0.0257192
0.961	0.00772217	0.00430703	0.00717975	0.0218589	0.0097688	0.0246794
0.962	0.00686752	0.00442303	0.00662623	0.0218593	0.0105207	0.0236813
0.963	0.0056413	0.00483219	0.00612965	0.0218913	0.011581	0.0228521
0.964	0.00421506	0.00529671	0.00560306	0.0220596	0.0126784	0.0222746
0.965	0.00271428	0.00555369	0.00497214	0.0223941	0.0135568	0.0219462
0.966	0.00110284	0.0054631	0.00432206	0.0227808	0.0141631	0.0218731
0.967	-0.000560311	0.00508802	0.003749	0.023084	0.0146206	0.0221511
0.968	-0.00207277	0.00459025	0.00324797	0.0232394	0.0150046	0.0227887
0.969	-0.0033047	0.004036	0.0027813	0.0232106	0.0152897	0.023598
0.97	-0.00418887	0.00331479	0.00248652	0.0229854	0.0154468	0.0243925
0.971	-0.00466422	0.0023443	0.00257185	0.0225889	0.0154742	0.0251343
0.972	-0.00476816	0.00141005	0.00298777	0.022111	0.0154578	0.0258892
0.973	-0.00459412	0.000994586	0.00353561	0.0217694	0.0154793	0.0267355
0.974	-0.00412993	0.00128696	0.0041567	0.0218355	0.0154805	0.0276978
0.975	-0.00324545	0.00214897	0.00481399	0.0224416	0.0153815	0.0287772
0.976	-0.00189321	0.00332908	0.00526092	0.023575	0.0151666	0.0299775
0.977	-0.000223603	0.00454567	0.00518858	0.0251979	0.0148369	0.0312421
0.978	0.00151327	0.0055198	0.00451168	0.0271683	0.0144422	0.03244
0.979	0.00303529	0.00605773	0.00336694	0.029196	0.0140857	0.0334162
0.98	0.00414543	0.00611013	0.00186871	0.0310427	0.0138404	0.0340476
0.981	0.00484246	0.00568171	9.37675e-05	0.0325739	0.0137468	0.0343005
0.982	0.00516895	0.0047316	-0.00173891	0.0336292	0.0138747	0.0343019
0.983	0.00510131	0.00320856	-0.00341083	0.0340523	0.0142801	0.03426
0.984	0.00465585	0.00123478	-0.00483665	0.0337947	0.0148536	0.03423
0.985	0.00390619	-0.00085205	-0.00587139	0.0329393	0.0153757	0.0341332
0.986	0.00296465	-0.00273479	-0.00627093	0.0316493	0.0157352	0.0338907
0.987	0.00200515	-0.0041621	-0.00590054	0.030111	0.0159311	0.0334197
0.988	0.00120398	-0.00492147	-0.00484888	0.0285038	0.0159951	0.0327102
0.989	0.000678011	-0.00503132	-0.00337903	0.0269252	0.0159749	0.031898
0.99	0.000468215	-0.00465662	-0.00183588	0.0254416	0.0159117	0.0311284
0.991	0.000558643	-0.00381147	-0.000551979	0.0241688	0.0158346	0.0304172
0.992	0.000894551	-0.00244605	0.000304604	0.0231956	0.0157404	0.0297149
0.993	0.00137639	-0.000731669	0.000848331	0.0225364	0.0155767	0.0290064
0.994	0.00186129	0.000932226	0.00130628	0.0221683	0.0152512	0.0283086
0.995	0.0022431	0.00221271	0.00171899	0.0220594	0.0147036	0.0276412
0.996	0.00253685	0.00301739	0.00189411	0.0221419	0.0140144	0.0270522
0.997	0.0027556	0.00335738	0.00157634	0.0223077	0.0133097	0.0265922
0.998	0.00279687	0.00329701	0.000637183	0.0225211	0.0125678	0.0262409
0.999	0.00262911	0.00299235	-0.000845573	0.0228514	0.0117257	0.0259624
1	0.00242266	0.0025849	-0.00268228	0.023327	0.0109046	0.0257602
1.001	0.00227817	0.00207355	-0.00470388	0.0238768	0.0103144	0.0256158
1.002	0.00207802	0.0013802	-0.00679293	0.0244034	0.00999787	0.0254262
1.003	0.00173487	0.000570349	-0.00877036	0.0248459	0.0098409	0.0250474
1.004	0.00129594	-0.000190661	-0.0103255	0.0252616	0.00976133	0.024489
1.005	0.00087219	-0.000796417	-0.0111956	0.0257302	0.009777	0.0239664
1.006	0.000567377	-0.00108273	-0.0113355	0.0261472	0.00991741	0.0236499
1.007	0.000361277	-0.000858338	-0.0108566	0.0263616	0.0101745	0.0235207
1.008	0.000138606	-0.00018046	-0.00988714	0.0263821	0.0105555	0.0234877
1.009	-0.000150888	0.000695937	-0.00855794	0.026298	0.0110647	0.0234865
1.01	-0.000448071	0.00156596	-0.00713243	0.0261654	0.0116123	0.0234416
1.011	-0.000639708	0.00226435	-0.00596665	0.0259686	0.0120405	0.0232792
1.012	-0.000616261	0.00265844	-0.00524943	0.0256421	0.0123195	0.0230866
1.013	-0.000367442	0.00275381	-0.0049525	0.0251983	0.0125615	0.0231109
1.014	-4.57679e-05	0.00256935	-0.00498519	0.0247143	0.0128071	0.0235313
1.015	0.000139567	0.00197988	-0.00523931	0.0241996	0.0130312	0.024332
1.016	0.000131949	0.000850426	-0.00553663	0.0236755	0.0132918	0.0253867
1.017	-6.09726e-06	-0.00076968	-0.00559238	0.0231371	0.0137013	0.0265769
1.018	-0.000342366	-0.00263973	-0.00514231	0.0224559	0.0143084	0.0277827
1.019	-0.00100764	-0.00447338	-0.00410229	0.0215839	0.0150834	0.0288364
1.02	-0.00190466	-0.00609542	-0.00252012	0.0206264	0.0159994	0.0295746
1.021	-0.00273394	-0.00744786	-0.00045713	0.0196951	0.0170538	0.0299395
1.022	-0.00321899	-0.0084716	0.00201153	0.01889	0.0181834	0.030016
1.023	-0.0031666	-0.00909667	0.00471182	0.0183099	0.0191928	0.0299789
1.024	-0.00253287	-0.00938419	0.00739452	0.018024	0.0198379	0.0299666
1.025	-0.00150194	-0.00952365	0.00987091	0.0181246	0.0200599	0.0299908
1.026	-0.000260327	-0.00964735	0.0120073	0.0187245	0.0200197	0.0300264
1.027	0.00117956	-0.00979913	0.0135737	0.0198432	0.0199204	0.0300797
1.028	0.00276206	-0.0100725	0.0143369	0.0213508	0.0199505	0.0301506
1.029	0.00425397	-0.010609	0.0143374	0.0230761	0.0202439	0.0302756
1.03	0.00546452	-0.0114028	0.0138691	0.0249325	0.0208626	0.0305745
1.031	0.00640545	-0.0122758	0.0132364	0.0268464	0.021837	0.0311955
1.032	0.00713444	-0.0130876	0.0126161	0.0286971	0.023109	0.0322258
1.033	0.00761633	-0.0137899	0.0120261	0.0304301	0.0245631	0.0336217
1.034	0.00782131	-0.0143442	0.0114081	0.0320772	0.0261242	0.035271
1.035	0.00781778	-0.0146857	0.01086	0.0337024	0.0277457	0.0372336
1.036	0.00778478	-0.0147378	0.0106291	0.03539	0.0293575	0.0397305
1.037	0.00801431	-0.0145307	0.0107801	0.0371448	0.0308599	0.0428085
1.038	0.00877609	-0.0141276	0.0111742	0.0388714	0.0321727	0.046243
1.039	0.0101242	-0.0134061	0.0117401	0.0404535	0.0332299	0.0497426
1.04	0.0119329	-0.012198	0.0124292	0.0417306	0.0339913	0.0530107
1.041	0.0140312	-0.0104706	0.0130209	0.0425477	0.0344802	0.0557119
1.042	0.0161887	-0.00827604	0.0132455	0.0429354	0.0347378	0.057641
1.043	0.0180883	-0.00572989	0.0130485	0.0430625	0.0348077	0.0588071
1.044	0.0194449	-0.00302602	0.0125911	0.0430138	0.0348033	0.0593279
1.045	0.0201928	-0.000480739	0.0121085	0.0427819	0.0348871	0.0593336
1.046	0.0204762	0.00151542	0.0117439	0.0423707	0.035132	0.0589072
1.047	0.0204612	0.00268639	0.0114148	0.0418123	0.0354828	0.0581501
1.048	0.020236	0.00297675	0.0110062	0.0411307	0.0358619	0.057193
1.049	0.0198554	0.00259822	0.0106027	0.0403157	0.0362117	0.0560624
1.05	0.0194446	0.00197283	0.0103909	0.039325	0.0364347	0.0546928
1.051	0.0191393	0.00151322	0.0105045	0.0381457	0.036417	0.0530874
1.052	0.0189419	0.00149371	0.0109681	0.0368718	0.0361124	0.0513722
1.053	0.0187622	0.00204569	0.011726	0.0356065	0.0355569	0.0496617
1.054	0.0184989	0.00321202	0.012691	0.0343298	0.0347757	0.04793
1.055	0.0181042	0.0050164	0.0137039	0.0330029	0.0337163	0.0460773
1.056	0.0176202	0.0073953	0.0145208	0.031687	0.0324164	0.0440876
1.057	0.0170557	0.0101749	0.0149159	0.0304881	0.0310807	0.0421129
1.058	0.0163728	0.013185	0.0148426	0.0294524	0.0298722	0.0403481
1.059	0.0156053	0.016245	0.0144113	0.028529	0.0288405	0.0388503
1.06	0.0147929	0.019163	0.0137203	0.0276601	0.0279936	0.037597
1.061	0.0138895	0.0218545	0.0128915	0.0268537	0.0273048	0.0365281
1.062	0.0127708	0.0242799	0.0121642	0.0261759	0.0266843	0.0355635
1.063	0.0113294	0.0262757	0.0118275	0.0257158	0.0259675	0.0347758
1.064	0.00965191	0.0275635	0.0119759	0.0255462	0.0249971	0.0343387
1.065	0.00799147	0.0279133	0.0123173	0.0257299	0.0237088	0.0343404
1.066	0.00653382	0.0273059	0.012382	0.0263037	0.0221524	0.0347651
1.067	0.00529196	0.0259483	0.0118745	0.0272545	0.020456	0.0354673
1.068	0.00424664	0.0241644	0.0106712	0.0284768	0.018772	0.0361979
1.069	0.00348876	0.0222548	0.00865809	0.0297459	0.0172446	0.0367591
1.07	0.00312673	0.0203855	0.00587131	0.0308698	0.0159796	0.0370666
1.071	0.00313266	0.0186272	0.00263929	0.0318283	0.0150531	0.0371507
1.072	0.00339767	0.0170248	-0.000580589	0.0327031	0.0144556	0.0371517
1.073	0.00389659	0.0156185	-0.00342025	0.0335288	0.0140223	0.0371478
1.074	0.00472801	0.0144764	-0.00576526	0.0342409	0.0135944	0.0370709
1.075	0.00600953	0.0136993	-0.00770735	0.0347818	0.0131815	0.0368667
1.076	0.0076727	0.0134207	-0.00933413	0.0352054	0.0128812	0.0365799
1.077	0.0094102	0.013695	-0.0106638	0.0356495	0.0127631	0.0363111
1.078	0.0109713	0.0143854	-0.011597	0.0362152	0.0128607	0.0361621
1.079	0.0123467	0.0152066	-0.0119689	0.036838	0.0132086	0.0361926
1.08	0.0135616	0.0158744	-0.011755	0.0373729	0.0138463	0.0364244
1.081	0.0145823	0.01632	-0.011111	0.0378197	0.0147481	0.0368108
1.082	0.0154744	0.0166448	-0.0102261	0.0382206	0.0157443	0.0371861
1.083	0.0163584	0.0168782	-0.00922428	0.0384728	0.0166201	0.0373371
1.084	0.0172381	0.0170058	-0.00825854	0.0384659	0.0172867	0.0371474
1.085	0.0180552	0.0170607	-0.00748319	0.0381982	0.0177613	0.0367273
1.086	0.0187793	0.0170323	-0.00682865	0.0377104	0.0181122	0.0363497
1.087	0.0193714	0.0169083	-0.00604264	0.0370427	0.0184581	0.0361888
1.088	0.0198334	0.0168087	-0.00493458	0.0362749	0.0188881	0.0362342
1.089	0.020258	0.0168443	-0.00349432	0.0355139	0.0193951	0.0364183
1.09	0.020745	0.0169849	-0.00190169	0.0348481	0.0199568	0.0367486
1.091	0.0213132	0.0172007	-0.000405854	0.034364	0.0206295	0.0373753
1.092	0.0218894	0.0174349	0.000794685	0.0341387	0.0214719	0.0385343
1.093	0.02242	0.0174906	0.00159151	0.0341689	0.022432	0.0403669
1.094	0.0228743	0.017186	0.00208471	0.0343768	0.0234329	0.0427966
1.095	0.0231801	0.0165097	0.00247888	0.0347369	0.0244532	0.0456568
1.096	0.0233342	0.015621	0.00278003	0.0352877	0.0254108	0.0488048
1.097	0.0233296	0.0147573	0.00290089	0.0359598	0.0262113	0.0520308
1.098	0.0230586	0.0141502	0.00301223	0.0364994	0.026929	0.0550823
1.099	0.0225391	0.0140686	0.00348053	0.036574	0.0277308	0.0577926
1.1	0.0219187	0.0147933	0.00464118	0.035857	0.0286572	0.0600894
1.101	0.0212041	0.0164184	0.00688838	0.0340582	0.0295328	0.0618923
1.102	0.0203396	0.0188239	0.0105693	0.0309668	0.030125	0.0629914
1.103	0.019428	0.0218587	0.0156122	0.0264544	0.0303126	0.0630933
1.104	0.0186145	0.0254388	0.0215936	0.0204279	0.0300037	0.0620079
1.105	0.017941	0.0295438	0.0281594	0.0128453	0.0290388	0.059675
1.106	0.0173531	0.0341925	0.0351376	0.00380041	0.027252	0.0559824
1.107	0.0166316	0.0393358	0.0422897	-0.00652324	0.0245926	0.050707
1.108	0.0154253	0.0447543	0.0492881	-0.0180335	0.0211281	0.043693
1.109	0.0134782	0.0502053	0.0558763	-0.0307678	0.0168544	0.0349259
1.11	0.0107657	0.0555066	0.0617648	-0.0448358	0.0115786	0.0244167
1.111	0.00733749	0.0603329	0.0665765	-0.0603735	0.00502354	0.0121769
1.112	0.00303047	0.0641421	0.0699967	-0.0773561	-0.00307321	-0.00170571
1.113	-0.002526	0.066351	0.0717483	-0.0955034	-0.0129136	-0.0171065
1.114	-0.00960478	0.0666146	0.0715508	-0.114546	-0.0245368	-0.0340029
1.115	-0.0182254	0.0649352	0.0692746	-0.13447	-0.037827	-0.0524504
1.116	-0.0283303	0.0614229	0.064885	-0.155438	-0.052677	-0.0724215
1.117	-0.0399269	0.0561436	0.0582809	-0.177618	-0.0690843	-0.0938533
1.118	-0.0530184	0.0492159	0.0494175	-0.201054	-0.0871146	-0.116724
1.119	-0.0675701	0.0408163	0.0383708	-0.22566	-0.106783	-0.140925
1.12	-0.0834503	0.0310996	0.0252444	-0.251283	-0.127981	-0.166216
1.121	-0.100282	0.0201042	0.0101762	-0.277724	-0.150566	-0.192356
1.122	-0.117556	0.00775344	-0.00660757	-0.304708	-0.174448	-0.219201
1.123	-0.134958	-0.00598208	-0.0248384	-0.331945	-0.199512	-0.24666
1.124	-0.15243	-0.020997	-0.0442653	-0.359324	-0.225504	-0.274613
1.125	-0.169986	-0.0370505	-0.0645567	-0.386911	-0.25208	-0.302918
1.126	-0.187597	-0.0538274	-0.0852149	-0.41485	-0.278993	-0.331477
1.127	-0.205136	-0.0710905	-0.105742	-0.443341	-0.306185	-0.360271
1.128	-0.222419	-0.0887943	-0.125928	-0.472516	-0.333715	-0.389317
1.129	-0.239321	-0.107006	-0.145908	-0.502287	-0.361739	-0.418596
1.13	-0.255897	-0.125692	-0.165927	-0.53237	-0.390456	-0.447945
1.131	-0.272386	-0.14466	-0.18614	-0.562474	-0.419931	-0.477122
1.132	-0.289097	-0.163725	-0.206554	-0.592412	-0.449998	-0.506049
1.133	-0.306183	-0.182825	-0.227054	-0.62206	-0.480311	-0.53483
1.134	-0.323562	-0.20195	-0.2475	-0.651327	-0.510552	-0.563575
1.135	-0.341077	-0.220979	-0.267722	-0.680145	-0.540663	-0.592364
1.136	-0.358686	-0.239756	-0.287576	-0.70848	-0.570772	-0.621274
1.137	-0.376487	-0.258255	-0.307039	-0.736309	-0.600886	-0.650229
1.138	-0.394539	-0.27651	-0.326167	-0.763606	-0.630796	-0.67896
1.139	-0.41272	-0.294542	-0.345069	-0.790397	-0.660254	-0.707075
1.14	-0.430851	-0.312379	-0.363932	-0.816754	-0.689115	-0.734181
1.141	-0.448743	-0.330046	-0.382964	-0.84268	-0.71737	-0.760074
1.142	-0.46617	-0.347642	-0.402233	-0.868003	-0.745068	-0.784836
1.143	-0.483016	-0.36534	-0.421594	-0.892468	-0.772204	-0.808663
1.144	-0.499341	-0.383182	-0.440844	-0.915944	-0.798698	-0.831619
1.145	-0.515321	-0.400973	-0.459809	-0.938487	-0.824467	-0.853775
1.146	-0.531217	-0.418521	-0.478309	-0.960225	-0.849518	-0.875363
1.147	-0.547331	-0.435907	-0.496266	-0.981225	-0.873931	-0.896582
1.148	-0.563833	-0.453362	-0.513736	-1.0015	-0.897748	-0.91749
1.149	-0.580607	-0.470981	-0.530791	-1.02103	-0.920949	-0.938061
1.15	-0.597343	-0.488718	-0.547529	-1.0398	-0.943512	-0.958246
1.151	-0.613756	-0.506538	-0.564087	-1.05774	-0.965377	-0.977973
1.152	-0.629678	-0.524437	-0.580543	-1.07487	-0.986427	-0.997082
1.153	-0.645019	-0.54242	-0.596857	-1.09121	-1.00664	-1.01541
1.154	-0.659721	-0.5604	-0.612865	-1.10682	-1.02607	-1.03294
1.155	-0.673796	-0.578111	-0.628385	-1.12181	-1.04468	-1.04975
1.156	-0.68733	-0.595287	-0.643366	-1.13626	-1.06241	-1.06597
1.157	-0.700362	-0.611794	-0.657786	-1.1501	-1.07922	-1.08165
1.158	-0.712846	-0.627537	-0.671594	-1.16316	-1.09514	-1.09677
1.159	-0.724779	-0.642384	-0.684838	-1.17542	-1.11021	-1.11122
1.16	-0.736187	-0.656178	-0.697627	-1.18689	-1.12453	-1.12506
1.161	-0.747014	-0.668891	-0.709971	-1.19753	-1.1382	-1.13837
1.162	-0.757224	-0.680668	-0.721805	-1.20741	-1.15136	-1.15109
1.163	-0.766879	-0.691662	-0.73308	-1.2167	-1.16399	-1.16307
1.164	-0.776081	-0.702034	-0.743741	-1.22548	-1.17601	-1.17427
1.165	-0.784934	-0.712047	-0.75378	-1.23373	-1.18738	-1.18478
1.166	-0.793548	-0.721911	-0.763337	-1.24142	-1.19811	-1.19468
1.167	-0.80211	-0.731574	-0.772463	-1.24862	-1.20828	-1.20396
1.168	-0.810719	-0.740867	-0.780945	-1.25543	-1.21791	-1.21262
1.169	-0.81925	-0.74976	-0.788577	-1.26206	-1.227	-1.22073
1.17	-0.827505	-0.758319	-0.79531	-1.26858	-1.23558	-1.22828
1.171	-0.835304	-0.766491	-0.801137	-1.27488	-1.24361	-1.2352
1.172	-0.84248	-0.774205	-0.806066	-1.28079	-1.25103	-1.24149
1.173	-0.848883	-0.781595	-0.810208	-1.28615	-1.25775	-1.24717
1.174	-0.854363	-0.788869	-0.813809	-1.29098	-1.26368	-1.25221
1.175	-0.858869	-0.796032	-0.817126	-1.29534	-1.26883	-1.25667
1.176	-0.862564	-0.802949	-0.820301	-1.29925	-1.27347	-1.26067
1.177	-0.8657	-0.809482	-0.823427	-1.30269	-1.27785	-1.26431
1.178	-0.868392	-0.815505	-0.826574	-1.30568	-1.28212	-1.26764
1.179	-0.870714	-0.820976	-0.829716	-1.30829	-1.28626	-1.27063
1.18	-0.872824	-0.825938	-0.8327	-1.31053	-1.29021	-1.27322
1.181	-0.874789	-0.830472	-0.835312	-1.3124	-1.29386	-1.27537
1.182	-0.876521	-0.834668	-0.837376	-1.31387	-1.29709	-1.27703
1.183	-0.877994	-0.838549	-0.838842	-1.31492	-1.29989	-1.27828
1.184	-0.87927	-0.842025	-0.839835	-1.31561	-1.30231	-1.27931
1.185	-0.880373	-0.845021	-0.840545	-1.3161	-1.30442	-1.28029
1.186	-0.881338	-0.847618	-0.841135	-1.31653	-1.30623	-1.28117
1.187	-0.8822	-0.849883	-0.841742	-1.31689	-1.30777	-1.28193
1.188	-0.882885	-0.851735	-0.842436	-1.31716	-1.30903	-1.28257
1.189	-0.88322	-0.853172	-0.843167	-1.31739	-1.31006	-1.283
1.19	-0.883089	-0.854255	-0.843861	-1.31755	-1.31096	-1.28321
1.191	-0.882545	-0.854938	-0.844573	-1.31753	-1.31168	-1.2833
1.192	-0.881707	-0.855196	-0.845437	-1.31723	-1.31216	-1.28319
1.193	-0.88059	-0.855011	-0.846486	-1.31662	-1.31238	-1.28275
1.194	-0.879121	-0.854349	-0.847646	-1.31579	-1.3124	-1.28205
1.195	-0.877314	-0.853377	-0.84877	-1.31492	-1.31222	-1.28123
1.196	-0.87534	-0.852421	-0.84971	-1.31406	-1.31188	-1.28028
1.197	-0.87339	-0.851694	-0.850351	-1.31317	-1.31146	-1.27909
1.198	-0.871553	-0.85123	-0.850511	-1.31218	-1.311	-1.2777
1.199	-0.869896	-0.851037	-0.849984	-1.31098	-1.3105	-1.27618
1.2	-0.868525	-0.85122	-0.848735	-1.30955	-1.3099	-1.27453
1.201	-0.867531	-0.851802	-0.846932	-1.30801	-1.30916	-1.2728
1.202	-0.866966	-0.8526	-0.844957	-1.30638	-1.30832	-1.27111
1.203	-0.866837	-0.853341	-0.843286	-1.30458	-1.30748	-1.26947
1.204	-0.867017	-0.853707	-0.842085	-1.30264	-1.30669	-1.2679
1.205	-0.867322	-0.853472	-0.841247	-1.3007	-1.30588	-1.26653
1.206	-0.867668	-0.8527	-0.84075	-1.29886	-1.30498	-1.26549
1.207	-0.867947	-0.85163	-0.840566	-1.29705	-1.30389	-1.26474
1.208	-0.867951	-0.850486	-0.840589	-1.29522	-1.30251	-1.26415
1.209	-0.867622	-0.849362	-0.840776	-1.2934	-1.3009	-1.26354
1.21	-0.867037	-0.848198	-0.841056	-1.29164	-1.29923	-1.26278
1.211	-0.866223	-0.846999	-0.841227	-1.28996	-1.29753	-1.26181
1.212	-0.865271	-0.845968	-0.84109	-1.28833	-1.29571	-1.26057
1.213	-0.864362	-0.845242	-0.840579	-1.28661	-1.29387	-1.25901
1.214	-0.863624	-0.844722	-0.839677	-1.2847	-1.29221	-1.25721
1.215	-0.863146	-0.844227	-0.838353	-1.28251	-1.29084	-1.25525
1.216	-0.862866	-0.843601	-0.836742	-1.28006	-1.28962	-1.25316
1.217	-0.86252	-0.842754	-0.835159	-1.27744	-1.28831	-1.25086
1.218	-0.861878	-0.841715	-0.833844	-1.27473	-1.28671	-1.24829
1.219	-0.860869	-0.84059	-0.832818	-1.2719	-1.28473	-1.24547
1.22	-0.859453	-0.83945	-0.831933	-1.26886	-1.2824	-1.24261
1.221	-0.857609	-0.838254	-0.831042	-1.26556	-1.27988	-1.23987
1.222	-0.855467	-0.836887	-0.830214	-1.26215	-1.2773	-1.23724
1.223	-0.853225	-0.835262	-0.82967	-1.25889	-1.2746	-1.23456
1.224	-0.851029	-0.833385	-0.829475	-1.25585	-1.27174	-1.23181
1.225	-0.848951	-0.831297	-0.829408	-1.25292	-1.26875	-1.22906
1.226	-0.846937	-0.829016	-0.829144	-1.25	-1.26568	-1.22636
1.227	-0.844929	-0.826603	-0.828549	-1.24703	-1.26249	-1.22372
1.228	-0.842988	-0.824184	-0.827699	-1.24398	-1.25907	-1.22114
1.229	-0.841197	-0.821879	-0.826719	-1.24089	-1.25545	-1.21856
1.23	-0.839594	-0.819757	-0.825788	-1.23784	-1.25174	-1.21594
1.231	-0.838235	-0.81787	-0.825036	-1.2349	-1.24805	-1.21331
1.232	-0.837145	-0.816331	-0.824363	-1.23215	-1.24457	-1.21072
1.233	-0.836227	-0.815268	-0.823572	-1.2297	-1.24139	-1.20807
1.234	-0.835391	-0.814691	-0.822598	-1.22766	-1.23844	-1.20516
1.235	-0.834637	-0.814499	-0.821518	-1.22598	-1.23568	-1.20194
1.236	-0.833932	-0.814608	-0.820431	-1.22455	-1.23314	-1.19851
1.237	-0.833145	-0.81488	-0.819362	-1.22311	-1.23076	-1.19498
1.238	-0.832155	-0.815009	-0.81825	-1.22138	-1.22846	-1.19145
1.239	-0.830949	-0.814716	-0.817064	-1.21913	-1.22611	-1.18802
1.24	-0.829512	-0.813945	-0.815921	-1.21634	-1.22362	-1.18483
1.241	-0.827711	-0.812776	-0.814975	-1.21319	-1.22098	-1.18197
1.242	-0.825472	-0.811243	-0.814266	-1.2098	-1.21832	-1.17948
1.243	-0.822949	-0.809341	-0.81374	-1.20629	-1.21573	-1.1773
1.244	-0.820338	-0.807172	-0.813257	-1.20282	-1.21322	-1.17534
1.245	-0.817728	-0.804926	-0.812659	-1.19948	-1.21062	-1.17352
1.246	-0.815138	-0.802721	-0.811891	-1.19631	-1.20778	-1.17175
1.247	-0.812535	-0.8006	-0.810942	-1.19328	-1.20472	-1.1699
1.248	-0.80995	-0.798582	-0.809803	-1.19028	-1.20166	-1.16789
1.249	-0.807626	-0.796707	-0.80847	-1.18718	-1.19877	-1.16574
1.25	-0.805836	-0.795039	-0.806897	-1.18381	-1.19606	-1.16357
1.251	-0.80466	-0.793548	-0.805061	-1.18007	-1.19346	-1.16144
1.252	-0.804075	-0.792116	-0.803072	-1.17607	-1.1909	-1.15927
1.253	-0.80396	-0.790644	-0.801104	-1.172	-1.18827	-1.157
1.254	-0.804009	-0.78917	-0.799262	-1.1681	-1.18546	-1.15461
1.255	-0.803943	-0.787853	-0.797553	-1.16447	-1.1825	-1.15211
1.256	-0.803639	-0.786648	-0.796001	-1.16113	-1.17954	-1.14949
1.257	-0.802972	-0.785185	-0.794651	-1.15801	-1.17663	-1.1468
1.258	-0.801818	-0.783181	-0.793419	-1.15506	-1.17377	-1.144
1.259	-0.800157	-0.780706	-0.792123	-1.15228	-1.17101	-1.14093
1.26	-0.798012	-0.778023	-0.790657	-1.14957	-1.16843	-1.13762
1.261	-0.795362	-0.775363	-0.789094	-1.14684	-1.16587	-1.13418
1.262	-0.79227	-0.772811	-0.787638	-1.14407	-1.16308	-1.1307
1.263	-0.789031	-0.770374	-0.786409	-1.14121	-1.15992	-1.12717
1.264	-0.786065	-0.76812	-0.785347	-1.1383	-1.15639	-1.12363
1.265	-0.783681	-0.766221	-0.784288	-1.13535	-1.15255	-1.1201
1.266	-0.781938	-0.764871	-0.783075	-1.13232	-1.1485	-1.11662
1.267	-0.780729	-0.764151	-0.78175	-1.12926	-1.14438	-1.11332
1.268	-0.77989	-0.763941	-0.780528	-1.12625	-1.14028	-1.11028
1.269	-0.779209	-0.764019	-0.77951	-1.12335	-1.13623	-1.10759
1.27	-0.778525	-0.764196	-0.778615	-1.12049	-1.1323	-1.10515
1.271	-0.777811	-0.764362	-0.777723	-1.11764	-1.12855	-1.1027
1.272	-0.777028	-0.76437	-0.776837	-1.11483	-1.12497	-1.10009
1.273	-0.775972	-0.763965	-0.776078	-1.11213	-1.12148	-1.09744
1.274	-0.774371	-0.762998	-0.775492	-1.10948	-1.11806	-1.09486
1.275	-0.772176	-0.761565	-0.774973	-1.10672	-1.1148	-1.09231
1.276	-0.76961	-0.759844	-0.774363	-1.10375	-1.11178	-1.08968
1.277	-0.766934	-0.757911	-0.773477	-1.1005	-1.10899	-1.08686
1.278	-0.764328	-0.755718	-0.772172	-1.09702	-1.10643	-1.0838
1.279	-0.761875	-0.753252	-0.770421	-1.09346	-1.10414	-1.08045
1.28	-0.759585	-0.750691	-0.768277	-1.09003	-1.10202	-1.07682
1.281	-0.757477	-0.748311	-0.765894	-1.08682	-1.0999	-1.07303
1.282	-0.755588	-0.746295	-0.763462	-1.08383	-1.09772	-1.06937
1.283	-0.753953	-0.744717	-0.761059	-1.08097	-1.09545	-1.06601
1.284	-0.75255	-0.743576	-0.758687	-1.07805	-1.09289	-1.06289
1.285	-0.751308	-0.742752	-0.756403	-1.07497	-1.08992	-1.05997
1.286	-0.750242	-0.742056	-0.754348	-1.07189	-1.08666	-1.05726
1.287	-0.749332	-0.741408	-0.752592	-1.06892	-1.0833	-1.05468
1.288	-0.748362	-0.740881	-0.750985	-1.06597	-1.07997	-1.05207
1.289	-0.747102	-0.740469	-0.749304	-1.06292	-1.0767	-1.04941
1.29	-0.745435	-0.73996	-0.747514	-1.05973	-1.07352	-1.04679
1.291	-0.743354	-0.739215	-0.745748	-1.05644	-1.0704	-1.04422
1.292	-0.74095	-0.73827	-0.744095	-1.05313	-1.06733	-1.04161
1.293	-0.738318	-0.737114	-0.742572	-1.04981	-1.06442	-1.0389
1.294	-0.735563	-0.73568	-0.741135	-1.04643	-1.06183	-1.03605
1.295	-0.732834	-0.734005	-0.739704	-1.04292	-1.05956	-1.03314
1.296	-0.730231	-0.732237	-0.738328	-1.03922	-1.05745	-1.03028
1.297	-0.72783	-0.730488	-0.737181	-1.0354	-1.0554	-1.0275
1.298	-0.725747	-0.728785	-0.736375	-1.03159	-1.05333	-1.02483
1.299	-0.724058	-0.727174	-0.735855	-1.02792	-1.05121	-1.02223
1.3	-0.722731	-0.725703	-0.735395	-1.02453	-1.04902	-1.01966
1.301	-0.721632	-0.724401	-0.734733	-1.02146	-1.04663	-1.01701
1.302	-0.720566	-0.723293	-0.733781	-1.0186	-1.04401	-1.01421
1.303	-0.719385	-0.722328	-0.73261	-1.01582	-1.04112	-1.0112
1.304	-0.717975	-0.721387	-0.731313	-1.01299	-1.03798	-1.00794
1.305	-0.716284	-0.720417	-0.730026	-1.01004	-1.03468	-1.00438
1.306	-0.714398	-0.719424	-0.728906	-1.00696	-1.03136	-1.00059
1.307	-0.712481	-0.718348	-0.727976	-1.00375	-1.02811	-0.996679
1.308	-0.710687	-0.717055	-0.727175	-1.00045	-1.02498	-0.992864
1.309	-0.709138	-0.715475	-0.726524	-0.997107	-1.02207	-0.989282
1.31	-0.70788	-0.713651	-0.726016	-0.993746	-1.01941	-0.985939
1.311	-0.706856	-0.711736	-0.725453	-0.990394	-1.01692	-0.982778
1.312	-0.705977	-0.709943	-0.724595	-0.987073	-1.01456	-0.979713
1.313	-0.705187	-0.70842	-0.723362	-0.9838	-1.01223	-0.976668
1.314	-0.704407	-0.707139	-0.721866	-0.980703	-1.00973	-0.973704
1.315	-0.703494	-0.705899	-0.720249	-0.977967	-1.00697	-0.971022
1.316	-0.702338	-0.704476	-0.718488	-0.975655	-1.00403	-0.968753
1.317	-0.700982	-0.702816	-0.716456	-0.973673	-1.00109	-0.966912
1.318	-0.699528	-0.700967	-0.714125	-0.97189	-0.998264	-0.965477
1.319	-0.697973	-0.698972	-0.711662	-0.970186	-0.995559	-0.964293
1.32	-0.696262	-0.696857	-0.709359	-0.968487	-0.992892	-0.963069
1.321	-0.694447	-0.694527	-0.707393	-0.966735	-0.990162	-0.961586
1.322	-0.692564	-0.69182	-0.705753	-0.96482	-0.987364	-0.959806
1.323	-0.690539	-0.688777	-0.704349	-0.962619	-0.984567	-0.957782
1.324	-0.688334	-0.685669	-0.703064	-0.96008	-0.981797	-0.955589
1.325	-0.685966	-0.682728	-0.701771	-0.957185	-0.979029	-0.953266
1.326	-0.683482	-0.679976	-0.700387	-0.953932	-0.976267	-0.950766
1.327	-0.680975	-0.677341	-0.698886	-0.9504	-0.973546	-0.948041
1.328	-0.67849	-0.674826	-0.697314	-0.946741	-0.970786	-0.945116
1.329	-0.676006	-0.672486	-0.695778	-0.943087	-0.967827	-0.942024
1.33	-0.673539	-0.670363	-0.69434	-0.93956	-0.964571	-0.938797
1.331	-0.671145	-0.668473	-0.693048	-0.936285	-0.960976	-0.935507
1.332	-0.668883	-0.666825	-0.691975	-0.933325	-0.957117	-0.932244
1.333	-0.666775	-0.665384	-0.691057	-0.930665	-0.953286	-0.929084
1.334	-0.664761	-0.664	-0.690082	-0.928231	-0.949834	-0.926119
1.335	-0.662786	-0.662581	-0.688906	-0.925951	-0.946869	-0.923411
1.336	-0.660919	-0.66125	-0.687517	-0.923835	-0.944208	-0.920904
1.337	-0.659243	-0.66018	-0.685896	-0.921946	-0.941679	-0.918482
1.338	-0.657747	-0.659435	-0.68396	-0.92028	-0.939249	-0.916087
1.339	-0.656355	-0.65903	-0.681675	-0.918694	-0.936838	-0.913735
1.34	-0.654904	-0.658917	-0.679187	-0.91697	-0.934291	-0.911486
1.341	-0.65322	-0.658969	-0.676724	-0.914993	-0.931555	-0.909407
1.342	-0.651336	-0.659023	-0.674416	-0.912795	-0.928733	-0.907527
1.343	-0.649485	-0.658878	-0.672234	-0.910383	-0.926023	-0.905758
1.344	-0.647836	-0.658407	-0.670033	-0.907741	-0.923612	-0.903889
1.345	-0.646361	-0.657688	-0.667749	-0.904961	-0.921608	-0.901731
1.346	-0.644952	-0.656879	-0.665538	-0.902151	-0.919938	-0.899286
1.347	-0.64358	-0.6561	-0.663509	-0.899212	-0.918331	-0.896723
1.348	-0.642277	-0.655377	-0.661539	-0.895922	-0.916576	-0.894187
1.349	-0.641046	-0.654593	-0.659481	-0.892239	-0.91467	-0.891729
1.35	-0.63988	-0.653671	-0.657301	-0.888345	-0.912694	-0.889383
1.351	-0.638805	-0.652658	-0.654983	-0.884392	-0.910716	-0.887199
1.352	-0.637771	-0.65156	-0.652608	-0.880518	-0.908782	-0.885194
1.353	-0.636642	-0.650303	-0.65044	-0.877029	-0.906922	-0.883239
1.354	-0.635384	-0.648848	-0.648688	-0.874169	-0.905091	-0.881107
1.355	-0.634048	-0.64713	-0.647388	-0.871862	-0.903148	-0.878739
1.356	-0.632665	-0.645096	-0.646598	-0.869879	-0.901035	-0.876284
1.357	-0.631255	-0.642894	-0.646398	-0.868068	-0.89883	-0.873911
1.358	-0.629798	-0.640818	-0.646635	-0.866341	-0.896654	-0.871681
1.359	-0.628256	-0.639048	-0.646984	-0.864583	-0.894578	-0.869558
1.36	-0.626682	-0.637593	-0.647325	-0.862747	-0.892622	-0.867503
1.361	-0.625181	-0.636401	-0.647697	-0.860913	-0.890811	-0.865471
1.362	-0.623747	-0.635403	-0.647952	-0.859124	-0.889086	-0.863371
1.363	-0.622292	-0.634525	-0.647805	-0.85732	-0.887264	-0.861132
1.364	-0.6208	-0.633689	-0.647165	-0.855474	-0.885181	-0.858804
1.365	-0.619297	-0.632859	-0.646141	-0.85359	-0.882767	-0.856569
1.366	-0.617769	-0.632055	-0.644832	-0.851561	-0.880095	-0.85456
1.367	-0.616258	-0.631297	-0.643369	-0.849265	-0.877297	-0.852707
1.368	-0.614872	-0.630589	-0.641925	-0.846749	-0.874457	-0.850878
1.369	-0.613684	-0.629936	-0.640489	-0.844143	-0.871659	-0.849024
1.37	-0.612716	-0.629301	-0.638966	-0.84152	-0.868988	-0.847175
1.371	-0.61201	-0.628567	-0.637387	-0.838929	-0.866531	-0.845345
1.372	-0.611588	-0.627605	-0.635727	-0.83645	-0.86441	-0.843467
1.373	-0.611336	-0.626407	-0.633873	-0.834187	-0.862657	-0.84152
1.374	-0.610993	-0.625035	-0.63191	-0.832185	-0.861187	-0.839541
1.375	-0.61031	-0.62345	-0.630089	-0.830327	-0.859882	-0.837539
1.376	-0.609192	-0.621614	-0.628576	-0.828447	-0.858513	-0.835482
1.377	-0.607752	-0.61965	-0.627422	-0.82649	-0.856846	-0.833284
1.378	-0.606169	-0.617741	-0.626641	-0.824461	-0.8549	-0.830854
1.379	-0.604479	-0.616004	-0.626192	-0.822281	-0.85283	-0.828205
1.38	-0.602657	-0.614502	-0.625987	-0.819829	-0.850642	-0.825465
1.381	-0.600794	-0.613281	-0.625859	-0.817063	-0.848314	-0.822748
1.382	-0.598933	-0.612299	-0.625517	-0.814001	-0.845963	-0.820053
1.383	-0.596994	-0.611432	-0.624699	-0.810668	-0.84365	-0.817321
1.384	-0.594969	-0.610609	-0.623405	-0.807168	-0.841348	-0.81454
1.385	-0.59293	-0.609855	-0.621912	-0.803683	-0.839057	-0.811794
1.386	-0.590925	-0.609122	-0.620519	-0.800355	-0.836742	-0.809157
1.387	-0.588972	-0.608179	-0.619432	-0.797352	-0.834344	-0.806589
1.388	-0.587109	-0.606828	-0.618766	-0.794842	-0.831843	-0.804061
1.389	-0.585446	-0.605082	-0.61844	-0.792787	-0.829224	-0.801627
1.39	-0.5841	-0.603093	-0.618229	-0.791028	-0.826483	-0.799354
1.391	-0.583009	-0.601113	-0.617983	-0.789477	-0.82366	-0.797312
1.392	-0.581964	-0.599368	-0.617603	-0.788064	-0.820843	-0.795539
1.393	-0.580883	-0.597917	-0.617003	-0.786593	-0.818171	-0.793961
1.394	-0.579844	-0.596764	-0.616199	-0.784848	-0.815745	-0.792409
1.395	-0.578915	-0.595883	-0.615288	-0.782818	-0.813593	-0.790717
1.396	-0.57812	-0.595036	-0.614312	-0.780659	-0.811693	-0.788797
1.397	-0.57744	-0.593909	-0.613138	-0.778497	-0.809919	-0.786663
1.398	-0.576794	-0.59244	-0.611562	-0.776374	-0.808061	-0.784439
1.399	-0.576119	-0.590761	-0.60951	-0.774261	-0.805997	-0.782281
1.4	-0.575384	-0.589048	-0.607118	-0.772088	-0.803794	-0.780242
1.401	-0.574557	-0.587549	-0.604666	-0.769848	-0.801579	-0.778296
1.402	-0.573685	-0.586393	-0.602365	-0.767608	-0.799395	-0.776375
1.403	-0.572823	-0.585471	-0.600267	-0.765388	-0.797172	-0.774383
1.404	-0.571898	-0.584602	-0.598491	-0.763136	-0.794899	-0.772266
1.405	-0.570804	-0.583618	-0.597195	-0.760861	-0.792722	-0.770002
1.406	-0.569507	-0.582431	-0.596252	-0.758643	-0.790721	-0.767597
1.407	-0.567999	-0.581154	-0.595307	-0.756496	-0.788814	-0.765193
1.408	-0.566214	-0.579974	-0.594112	-0.754368	-0.786899	-0.762924
1.409	-0.564072	-0.578956	-0.592687	-0.752244	-0.784882	-0.760757
1.41	-0.561648	-0.578016	-0.59128	-0.750177	-0.782736	-0.758562
1.411	-0.559187	-0.576997	-0.590183	-0.748227	-0.780577	-0.75627
1.412	-0.556914	-0.575765	-0.589535	-0.746393	-0.778507	-0.753894
1.413	-0.55491	-0.574296	-0.589256	-0.74458	-0.776506	-0.75145
1.414	-0.553151	-0.572688	-0.589212	-0.742636	-0.774556	-0.748976
1.415	-0.551631	-0.571083	-0.589333	-0.740453	-0.772722	-0.746514
1.416	-0.550417	-0.569619	-0.589517	-0.738037	-0.77106	-0.74404
1.417	-0.549495	-0.568383	-0.589521	-0.735535	-0.769494	-0.741564
1.418	-0.548717	-0.56737	-0.589114	-0.733159	-0.767884	-0.739185
1.419	-0.547963	-0.566455	-0.588262	-0.731007	-0.766198	-0.736972
1.42	-0.547197	-0.565419	-0.587051	-0.729101	-0.764486	-0.734998
1.421	-0.546369	-0.564094	-0.585555	-0.727503	-0.762701	-0.733383
1.422	-0.54532	-0.56239	-0.583847	-0.726228	-0.760757	-0.732144
1.423	-0.54385	-0.560284	-0.582038	-0.725175	-0.758676	-0.73116
1.424	-0.541933	-0.557947	-0.580252	-0.72424	-0.756536	-0.73021
1.425	-0.539829	-0.555666	-0.578564	-0.723349	-0.754391	-0.729094
1.426	-0.537849	-0.553596	-0.577016	-0.722409	-0.752221	-0.727821
1.427	-0.536073	-0.551753	-0.575675	-0.721305	-0.749949	-0.726493
1.428	-0.534453	-0.550147	-0.574536	-0.719969	-0.74756	-0.725057
1.429	-0.533028	-0.548792	-0.573492	-0.718341	-0.745175	-0.723397
1.43	-0.531805	-0.54766	-0.572516	-0.716343	-0.742975	-0.721553
1.431	-0.530646	-0.546714	-0.571604	-0.713924	-0.741035	-0.71961
1.432	-0.529428	-0.546001	-0.570663	-0.711009	-0.739228	-0.717615
1.433	-0.528189	-0.545572	-0.569668	-0.707547	-0.737413	-0.715672
1.434	-0.527023	-0.545289	-0.568659	-0.703691	-0.73564	-0.71391
1.435	-0.526016	-0.544933	-0.567535	-0.699736	-0.734026	-0.712356
1.436	-0.525222	-0.544412	-0.56614	-0.695963	-0.732559	-0.710926
1.437	-0.524529	-0.543716	-0.564485	-0.692585	-0.731148	-0.709508
1.438	-0.523795	-0.542864	-0.562676	-0.689689	-0.729812	-0.708047
1.439	-0.523038	-0.54187	-0.560779	-0.687213	-0.728622	-0.706585
1.44	-0.522277	-0.540659	-0.558843	-0.685042	-0.727498	-0.70519
1.441	-0.521402	-0.539159	-0.556916	-0.683094	-0.72628	-0.703862
1.442	-0.520322	-0.537402	-0.555053	-0.681388	-0.724894	-0.702575
1.443	-0.519078	-0.535472	-0.553326	-0.67995	-0.72326	-0.701325
1.444	-0.517748	-0.53348	-0.551831	-0.678666	-0.721215	-0.700111
1.445	-0.516363	-0.531608	-0.550594	-0.67737	-0.718718	-0.698876
1.446	-0.51496	-0.530085	-0.549488	-0.676006	-0.71594	-0.697515
1.447	-0.513608	-0.529005	-0.5484	-0.674683	-0.713153	-0.69598
1.448	-0.512353	-0.528328	-0.547409	-0.67355	-0.710557	-0.694272
1.449	-0.511166	-0.528029	-0.546754	-0.672638	-0.708141	-0.69233
1.45	-0.509991	-0.527964	-0.546544	-0.671867	-0.705782	-0.690043
1.451	-0.508875	-0.527808	-0.546581	-0.67115	-0.703457	-0.687448
1.452	-0.507957	-0.527362	-0.546573	-0.670418	-0.701336	-0.684759
1.453	-0.507343	-0.526639	-0.546297	-0.669634	-0.699576	-0.682234
1.454	-0.507069	-0.525657	-0.545548	-0.668743	-0.698104	-0.680039
1.455	-0.507123	-0.524394	-0.544243	-0.667617	-0.696715	-0.678123
1.456	-0.507391	-0.522808	-0.542516	-0.66614	-0.695269	-0.676346
1.457	-0.507594	-0.520824	-0.540562	-0.664328	-0.693788	-0.674716
1.458	-0.507372	-0.518465	-0.538483	-0.662325	-0.692381	-0.67328
1.459	-0.506496	-0.516027	-0.536386	-0.660248	-0.691031	-0.671934
1.46	-0.505021	-0.513909	-0.534469	-0.658128	-0.689525	-0.670517
1.461	-0.503174	-0.512303	-0.532891	-0.655998	-0.687682	-0.668984
1.462	-0.501162	-0.511151	-0.531733	-0.653934	-0.685514	-0.667416
1.463	-0.49918	-0.510271	-0.530999	-0.651993	-0.683161	-0.665903
1.464	-0.497472	-0.509491	-0.530532	-0.650142	-0.680808	-0.664466
1.465	-0.49624	-0.508794	-0.530139	-0.648312	-0.678646	-0.663024
1.466	-0.495522	-0.508323	-0.529694	-0.646522	-0.67676	-0.661436
1.467	-0.495249	-0.508209	-0.52904	-0.644832	-0.675054	-0.659601
1.468	-0.495298	-0.508369	-0.528037	-0.643263	-0.673363	-0.657521
1.469	-0.49547	-0.508556	-0.526707	-0.641809	-0.671622	-0.655273
1.47	-0.495671	-0.50856	-0.525137	-0.640419	-0.669817	-0.652936
1.471	-0.495914	-0.508238	-0.523312	-0.638998	-0.667863	-0.650556
1.472	-0.49613	-0.507482	-0.52119	-0.637478	-0.665687	-0.648225
1.473	-0.496243	-0.506221	-0.51888	-0.635823	-0.663326	-0.646118
1.474	-0.496206	-0.504458	-0.516656	-0.633977	-0.660815	-0.644327
1.475	-0.495933	-0.502387	-0.514774	-0.631955	-0.658149	-0.64275
1.476	-0.49534	-0.500287	-0.51328	-0.629916	-0.655403	-0.641192
1.477	-0.494463	-0.498256	-0.512068	-0.627977	-0.652723	-0.639552
1.478	-0.493376	-0.496279	-0.511056	-0.62611	-0.650248	-0.63788
1.479	-0.492082	-0.494413	-0.510234	-0.624299	-0.648051	-0.636213
1.48	-0.490583	-0.492686	-0.509602	-0.622568	-0.646124	-0.634519
1.481	-0.48886	-0.491048	-0.509162	-0.62087	-0.644416	-0.632778
1.482	-0.486882	-0.489579	-0.508854	-0.619147	-0.642858	-0.631015
1.483	-0.484766	-0.488456	-0.508522	-0.617487	-0.641346	-0.629247
1.484	-0.482715	-0.487697	-0.508084	-0.616071	-0.63982	-0.627473
1.485	-0.48077	-0.48718	-0.507566	-0.614903	-0.638249	-0.625746
1.486	-0.478888	-0.486786	-0.506929	-0.613797	-0.636553	-0.624119
1.487	-0.477124	-0.486375	-0.506048	-0.61261	-0.634677	-0.622579
1.488	-0.47554	-0.48582	-0.504854	-0.611252	-0.632599	-0.621074
1.489	-0.47414	-0.485151	-0.503364	-0.609681	-0.630259	-0.619567
1.49	-0.472972	-0.484478	-0.501672	-0.608	-0.627652	-0.618131
1.491	-0.472126	-0.48382	-0.499902	-0.60632	-0.62484	-0.616887
1.492	-0.471544	-0.483135	-0.498129	-0.60463	-0.621907	-0.615865
1.493	-0.471065	-0.482384	-0.496439	-0.602815	-0.619027	-0.614939
1.494	-0.470691	-0.481518	-0.494955	-0.600759	-0.616378	-0.61392
1.495	-0.470498	-0.480582	-0.493752	-0.598533	-0.613973	-0.612774
1.496	-0.470343	-0.47971	-0.492798	-0.596332	-0.611773	-0.611564
1.497	-0.470013	-0.478992	-0.491923	-0.594252	-0.609835	-0.61029
1.498	-0.469503	-0.478445	-0.490907	-0.592283	-0.608241	-0.608966
1.499	-0.468921	-0.47802	-0.489689	-0.590428	-0.607002	-0.607628
1.5	-0.468362	-0.477656	-0.488358	-0.588719	-0.606053	-0.606213
1.501	-0.467892	-0.477293	-0.486995	-0.587162	-0.605306	-0.604631
1.502	-0.467515	-0.476784	-0.485647	-0.585692	-0.604667	-0.602907
1.503	-0.467217	-0.475936	-0.484345	-0.584268	-0.604104	-0.601153
1.504	-0.466956	-0.474666	-0.483054	-0.582986	-0.603741	-0.599451
1.505	-0.466571	-0.473043	-0.481726	-0.581975	-0.603657	-0.597837
1.506	-0.465889	-0.471254	-0.48041	-0.581197	-0.603738	-0.596297
1.507	-0.464835	-0.469495	-0.479222	-0.580484	-0.603798	-0.594817
1.508	-0.46336	-0.467899	-0.478259	-0.579752	-0.603623	-0.593425
1.509	-0.461473	-0.466515	-0.477461	-0.579003	-0.603034	-0.592123
1.51	-0.459307	-0.465336	-0.476685	-0.578161	-0.602024	-0.590809
1.511	-0.457018	-0.464359	-0.475928	-0.57716	-0.600643	-0.589295
1.512	-0.454777	-0.463571	-0.475301	-0.576016	-0.598883	-0.587515
1.513	-0.452767	-0.462954	-0.474849	-0.574701	-0.596816	-0.585624
1.514	-0.451055	-0.462485	-0.474488	-0.573137	-0.594635	-0.583822
1.515	-0.449631	-0.462089	-0.474073	-0.571351	-0.592518	-0.582178
1.516	-0.448557	-0.461647	-0.473531	-0.569501	-0.59058	-0.580661
1.517	-0.447936	-0.461088	-0.472915	-0.567673	-0.58889	-0.579188
1.518	-0.447767	-0.4604	-0.472276	-0.565793	-0.587492	-0.577712
1.519	-0.447857	-0.459566	-0.471535	-0.563773	-0.586397	-0.576268
1.52	-0.447924	-0.458663	-0.470544	-0.561663	-0.585524	-0.574899
1.521	-0.447841	-0.457845	-0.469218	-0.559585	-0.584773	-0.57361
1.522	-0.447633	-0.457118	-0.46754	-0.557601	-0.584062	-0.572387
1.523	-0.447176	-0.456418	-0.465557	-0.555726	-0.583306	-0.571187
1.524	-0.446271	-0.455793	-0.463426	-0.553952	-0.582529	-0.569978
1.525	-0.444997	-0.455324	-0.461377	-0.552247	-0.581834	-0.568766
1.526	-0.443641	-0.45497	-0.459585	-0.550613	-0.581218	-0.567568
1.527	-0.442391	-0.454541	-0.458114	-0.549072	-0.580587	-0.56641
1.528	-0.441267	-0.453822	-0.457077	-0.547585	-0.579875	-0.565299
1.529	-0.440179	-0.452714	-0.45662	-0.546056	-0.579015	-0.564093
1.53	-0.439025	-0.451267	-0.456704	-0.544443	-0.577882	-0.562625
1.531	-0.437762	-0.44963	-0.457084	-0.542839	-0.576435	-0.560901
1.532	-0.436422	-0.44798	-0.457473	-0.541355	-0.574818	-0.559032
1.533	-0.435173	-0.446527	-0.457703	-0.540012	-0.573166	-0.557088
1.534	-0.434193	-0.445437	-0.457682	-0.538747	-0.571416	-0.555115
1.535	-0.433441	-0.444716	-0.457266	-0.537457	-0.569444	-0.553196
1.536	-0.432776	-0.444202	-0.456337	-0.536051	-0.567356	-0.551425
1.537	-0.432122	-0.443679	-0.45487	-0.534535	-0.565365	-0.549843
1.538	-0.431405	-0.443046	-0.452899	-0.533004	-0.563587	-0.548427
1.539	-0.430578	-0.442238	-0.45053	-0.531486	-0.56208	-0.547085
1.54	-0.429667	-0.441129	-0.448017	-0.52989	-0.560821	-0.54569
1.541	-0.428619	-0.439654	-0.445658	-0.528154	-0.55968	-0.544177
1.542	-0.427346	-0.437891	-0.443567	-0.526344	-0.558573	-0.542618
1.543	-0.425956	-0.436007	-0.441695	-0.52456	-0.557476	-0.541266
1.544	-0.424648	-0.434173	-0.440054	-0.52286	-0.556274	-0.540372
1.545	-0.423527	-0.432521	-0.438718	-0.521226	-0.554856	-0.539937
1.546	-0.422696	-0.431152	-0.437698	-0.519632	-0.553314	-0.539733
1.547	-0.422225	-0.430123	-0.437019	-0.51813	-0.551782	-0.539511
1.548	-0.422015	-0.429429	-0.436766	-0.516733	-0.550236	-0.539148
1.549	-0.421879	-0.429004	-0.436968	-0.515429	-0.548651	-0.538644
1.55	-0.421656	-0.428779	-0.43749	-0.514237	-0.547131	-0.538022
1.551	-0.421255	-0.428715	-0.438075	-0.513116	-0.545782	-0.53727
1.552	-0.420661	-0.428751	-0.438485	-0.512113	-0.544604	-0.536393
1.553	-0.419849	-0.428757	-0.438568	-0.511398	-0.543543	-0.535399
1.554	-0.418841	-0.4286	-0.438229	-0.510952	-0.542532	-0.534299
1.555	-0.417778	-0.428199	-0.437467	-0.51053	-0.541503	-0.533135
1.556	-0.416766	-0.427478	-0.436394	-0.509879	-0.540416	-0.531918
1.557	-0.415764	-0.426432	-0.435122	-0.508844	-0.539325	-0.530598
1.558	-0.414741	-0.425239	-0.433707	-0.507387	-0.53832	-0.529133
1.559	-0.413787	-0.424106	-0.432234	-0.505525	-0.537362	-0.527515
1.56	-0.413005	-0.423001	-0.430836	-0.50328	-0.536316	-0.525854
1.561	-0.412381	-0.42179	-0.429598	-0.500825	-0.535092	-0.524338
1.562	-0.411859	-0.420446	-0.428524	-0.498493	-0.533667	-0.523054
1.563	-0.411424	-0.419016	-0.427645	-0.496518	-0.532072	-0.521937
1.564	-0.411092	-0.417614	-0.427057	-0.49495	-0.530412	-0.520841
1.565	-0.410894	-0.416406	-0.426777	-0.493759	-0.528872	-0.51966
1.566	-0.410782	-0.415498	-0.426688	-0.492841	-0.527595	-0.518419
1.567	-0.410654	-0.414849	-0.426678	-0.492048	-0.526605	-0.517182
1.568	-0.410485	-0.414363	-0.42665	-0.491301	-0.525841	-0.515967
1.569	-0.410211	-0.414061	-0.426342	-0.490592	-0.525204	-0.514765
1.57	-0.409636	-0.413967	-0.425432	-0.489838	-0.524606	-0.513552
1.571	-0.408617	-0.413928	-0.423837	-0.488884	-0.524015	-0.512287
1.572	-0.407213	-0.413746	-0.421707	-0.487727	-0.523406	-0.51098
1.573	-0.40558	-0.413296	-0.419265	-0.486479	-0.522715	-0.509698
1.574	-0.403816	-0.412479	-0.416835	-0.485144	-0.52188	-0.508456
1.575	-0.402047	-0.411281	-0.414789	-0.483667	-0.52085	-0.507214
1.576	-0.400422	-0.40992	-0.413323	-0.482102	-0.519602	-0.505955
1.577	-0.398989	-0.408737	-0.412421	-0.480589	-0.518151	-0.504696
1.578	-0.397707	-0.407913	-0.411966	-0.47919	-0.516512	-0.503444
1.579	-0.396519	-0.407303	-0.411836	-0.477873	-0.514652	-0.502151
1.58	-0.395444	-0.406595	-0.411878	-0.476622	-0.512553	-0.500785
1.581	-0.394567	-0.405681	-0.411849	-0.475376	-0.510293	-0.499369
1.582	-0.393832	-0.404732	-0.411581	-0.474041	-0.508003	-0.497937
1.583	-0.393139	-0.403949	-0.411084	-0.472666	-0.505787	-0.496528
1.584	-0.392525	-0.403345	-0.410405	-0.471409	-0.503684	-0.495223
1.585	-0.391962	-0.402786	-0.409575	-0.470399	-0.501729	-0.494108
1.586	-0.391257	-0.402211	-0.408614	-0.469631	-0.500046	-0.493232
1.587	-0.390362	-0.40162	-0.40754	-0.468964	-0.498698	-0.492616
1.588	-0.38948	-0.400978	-0.406454	-0.468291	-0.497579	-0.49216
1.589	-0.388836	-0.4003	-0.405473	-0.467577	-0.496618	-0.491733
1.59	-0.38848	-0.399647	-0.404593	-0.466762	-0.495858	-0.491318
1.591	-0.388246	-0.399037	-0.403737	-0.465808	-0.495338	-0.490922
1.592	-0.387901	-0.398481	-0.402866	-0.464701	-0.495031	-0.490496
1.593	-0.387337	-0.397962	-0.402113	-0.463359	-0.494807	-0.489924
1.594	-0.386536	-0.397368	-0.401716	-0.46174	-0.494446	-0.489104
1.595	-0.385479	-0.396578	-0.401736	-0.460006	-0.493802	-0.487994
1.596	-0.384241	-0.395545	-0.401947	-0.458369	-0.492903	-0.486593
1.597	-0.383103	-0.394359	-0.402071	-0.456872	-0.491815	-0.484988
1.598	-0.382387	-0.393177	-0.402056	-0.45546	-0.490542	-0.483308
1.599	-0.382139	-0.392078	-0.401929	-0.454153	-0.489078	-0.481651
1.6	-0.38213	-0.391145	-0.401545	-0.453083	-0.487492	-0.480191
1.601	-0.382128	-0.390451	-0.400727	-0.452378	-0.485876	-0.47909
1.602	-0.382022	-0.389912	-0.39944	-0.452037	-0.484276	-0.478341
1.603	-0.381807	-0.389374	-0.397798	-0.451881	-0.482805	-0.477837
1.604	-0.38155	-0.388728	-0.396063	-0.451709	-0.481619	-0.477469
1.605	-0.381295	-0.387919	-0.394493	-0.45148	-0.48074	-0.477112
1.606	-0.381036	-0.386907	-0.393196	-0.45121	-0.480043	-0.476563
1.607	-0.380726	-0.385615	-0.392166	-0.45082	-0.479383	-0.475671
1.608	-0.380272	-0.384073	-0.391397	-0.450175	-0.478676	-0.474473
1.609	-0.379589	-0.38245	-0.390915	-0.449208	-0.477951	-0.473075
1.61	-0.378681	-0.380861	-0.390688	-0.447986	-0.477323	-0.471535
1.611	-0.377614	-0.379346	-0.390655	-0.446653	-0.476775	-0.469979
1.612	-0.376427	-0.377968	-0.390869	-0.445322	-0.476099	-0.468593
1.613	-0.37516	-0.376819	-0.391344	-0.444037	-0.475122	-0.467398
1.614	-0.373833	-0.376017	-0.391905	-0.442804	-0.473753	-0.466265
1.615	-0.372459	-0.375614	-0.392388	-0.441637	-0.47195	-0.465112
1.616	-0.371127	-0.375496	-0.392662	-0.440551	-0.469883	-0.463912
1.617	-0.369948	-0.37548	-0.392536	-0.439548	-0.467933	-0.462611
1.618	-0.369007	-0.375416	-0.391883	-0.438628	-0.466384	-0.461122
1.619	-0.368419	-0.375169	-0.390686	-0.43776	-0.465228	-0.459428
1.62	-0.368196	-0.374624	-0.389058	-0.43686	-0.464263	-0.457632
1.621	-0.368192	-0.373734	-0.387282	-0.435852	-0.463305	-0.455843
1.622	-0.368302	-0.372592	-0.385645	-0.434737	-0.462294	-0.454105
1.623	-0.368447	-0.371427	-0.384251	-0.433554	-0.461218	-0.45242
1.624	-0.368495	-0.370371	-0.38309	-0.432289	-0.460026	-0.450767
1.625	-0.368335	-0.369403	-0.382089	-0.430863	-0.458649	-0.449176
1.626	-0.367893	-0.368527	-0.38114	-0.429247	-0.457137	-0.447747
1.627	-0.367185	-0.36778	-0.380204	-0.427523	-0.455665	-0.446562
1.628	-0.366315	-0.367179	-0.379308	-0.425795	-0.454365	-0.445602
1.629	-0.36536	-0.366793	-0.378442	-0.424062	-0.453207	-0.44478
1.63	-0.364331	-0.366667	-0.377568	-0.422249	-0.452057	-0.444035
1.631	-0.363189	-0.366725	-0.376659	-0.420363	-0.450826	-0.443366
1.632	-0.361894	-0.366836	-0.37569	-0.418534	-0.449537	-0.442773
1.633	-0.36042	-0.366909	-0.374705	-0.416937	-0.448247	-0.442213
1.634	-0.358749	-0.366994	-0.373822	-0.41573	-0.446968	-0.441627
1.635	-0.356949	-0.36724	-0.373025	-0.414989	-0.445655	-0.440963
1.636	-0.355213	-0.367646	-0.372154	-0.414645	-0.444331	-0.440212
1.637	-0.353798	-0.367938	-0.371137	-0.414478	-0.443191	-0.43946
1.638	-0.352886	-0.367823	-0.369976	-0.414191	-0.442412	-0.438754
1.639	-0.352509	-0.367238	-0.368651	-0.413577	-0.441938	-0.437987
1.64	-0.352553	-0.366285	-0.367273	-0.412653	-0.441562	-0.437022
1.641	-0.352845	-0.365083	-0.366062	-0.411588	-0.441106	-0.435801
1.642	-0.353212	-0.363705	-0.365071	-0.410541	-0.44041	-0.434332
1.643	-0.353418	-0.36218	-0.364251	-0.409607	-0.439378	-0.432798
1.644	-0.353254	-0.3606	-0.363668	-0.408778	-0.438059	-0.431485
1.645	-0.352693	-0.359123	-0.36342	-0.407975	-0.436592	-0.430445
1.646	-0.351838	-0.357872	-0.363505	-0.407211	-0.435101	-0.429463
1.647	-0.350759	-0.356951	-0.363863	-0.406583	-0.433602	-0.42834
1.648	-0.349424	-0.356498	-0.364423	-0.406135	-0.432057	-0.427011
1.649	-0.347784	-0.356586	-0.365089	-0.405781	-0.430528	-0.425469
1.65	-0.345903	-0.357099	-0.365758	-0.405396	-0.429088	-0.423781
1.651	-0.344067	-0.357772	-0.366293	-0.404907	-0.427686	-0.422095
1.652	-0.342666	-0.358395	-0.366493	-0.40431	-0.426274	-0.420565
1.653	-0.341928	-0.358914	-0.366183	-0.403631	-0.424873	-0.419306
1.654	-0.341769	-0.359252	-0.365375	-0.402852	-0.423575	-0.418415
1.655	-0.341852	-0.359252	-0.364203	-0.401979	-0.422514	-0.417924
1.656	-0.341915	-0.358833	-0.362851	-0.401109	-0.421798	-0.417643
1.657	-0.341923	-0.357994	-0.361583	-0.400351	-0.421479	-0.417295
1.658	-0.341895	-0.356754	-0.360588	-0.399714	-0.421487	-0.416809
1.659	-0.34175	-0.35517	-0.359848	-0.399131	-0.421604	-0.416262
1.66	-0.341386	-0.353299	-0.3592	-0.398599	-0.42159	-0.415667
1.661	-0.340799	-0.351228	-0.358469	-0.398175	-0.421348	-0.415001
1.662	-0.340073	-0.349222	-0.357655	-0.397817	-0.420907	-0.414297
1.663	-0.33921	-0.347549	-0.356925	-0.397332	-0.420364	-0.413578
1.664	-0.338205	-0.346215	-0.356352	-0.396488	-0.41981	-0.412802
1.665	-0.337202	-0.345108	-0.355855	-0.395252	-0.419236	-0.41196
1.666	-0.336318	-0.344292	-0.355397	-0.393894	-0.418608	-0.411074
1.667	-0.335491	-0.343873	-0.355032	-0.392728	-0.418007	-0.410146
1.668	-0.334597	-0.343751	-0.354788	-0.391805	-0.417506	-0.409185
1.669	-0.333672	-0.343793	-0.35464	-0.390934	-0.417019	-0.408235
1.67	-0.332879	-0.343979	-0.354537	-0.389914	-0.416498	-0.407336
1.671	-0.332259	-0.344191	-0.354427	-0.388695	-0.416051	-0.406503
1.672	-0.331698	-0.344217	-0.354354	-0.38732	-0.415696	-0.405763
1.673	-0.331052	-0.343931	-0.354392	-0.385867	-0.415278	-0.405177
1.674	-0.330271	-0.343209	-0.354496	-0.384433	-0.414677	-0.404779
1.675	-0.32945	-0.341952	-0.354525	-0.383089	-0.413956	-0.404454
1.676	-0.328689	-0.340316	-0.354313	-0.381883	-0.413222	-0.403983
1.677	-0.328003	-0.338592	-0.353706	-0.380848	-0.412454	-0.403277
1.678	-0.327439	-0.336935	-0.352664	-0.379932	-0.411595	-0.402414
1.679	-0.327064	-0.335333	-0.351348	-0.379033	-0.410671	-0.401495
1.68	-0.326854	-0.333753	-0.349991	-0.37809	-0.409745	-0.400547
1.681	-0.326767	-0.332331	-0.348785	-0.377072	-0.40881	-0.399544
1.682	-0.326682	-0.331421	-0.347847	-0.376057	-0.407781	-0.398459
1.683	-0.326383	-0.33136	-0.34714	-0.37521	-0.406605	-0.397287
1.684	-0.32575	-0.332155	-0.346503	-0.374599	-0.405324	-0.396098
1.685	-0.324767	-0.3335	-0.345783	-0.374163	-0.404073	-0.395019
1.686	-0.323486	-0.335064	-0.344926	-0.37379	-0.403058	-0.394126
1.687	-0.32202	-0.336581	-0.344019	-0.373423	-0.402392	-0.393398
1.688	-0.320533	-0.337829	-0.343199	-0.373134	-0.401988	-0.392816
1.689	-0.319249	-0.33865	-0.342487	-0.372973	-0.401661	-0.392414
1.69	-0.318225	-0.338997	-0.341768	-0.372802	-0.401297	-0.392154
1.691	-0.317291	-0.339006	-0.340963	-0.372397	-0.400859	-0.39191
1.692	-0.316364	-0.338815	-0.340124	-0.371617	-0.400244	-0.391543
1.693	-0.315459	-0.338346	-0.339274	-0.370493	-0.399298	-0.390956
1.694	-0.314636	-0.337446	-0.338299	-0.369154	-0.398025	-0.39012
1.695	-0.314049	-0.336039	-0.337131	-0.367686	-0.396593	-0.389072
1.696	-0.313818	-0.334112	-0.335944	-0.366132	-0.395175	-0.387871
1.697	-0.31389	-0.331809	-0.334993	-0.364575	-0.393857	-0.386571
1.698	-0.314069	-0.329458	-0.334379	-0.363162	-0.392593	-0.385243
1.699	-0.314176	-0.327408	-0.33399	-0.362018	-0.3913	-0.383975
1.7	-0.314171	-0.325904	-0.333533	-0.361166	-0.390055	-0.382814
1.701	-0.314115	-0.324954	-0.332762	-0.360551	-0.389008	-0.381747
1.702	-0.31406	-0.324306	-0.331753	-0.360041	-0.388151	-0.380771
1.703	-0.313986	-0.323705	-0.330744	-0.359519	-0.387352	-0.379932
1.704	-0.313876	-0.322964	-0.329865	-0.358967	-0.386572	-0.379274
1.705	-0.313758	-0.321933	-0.329104	-0.358372	-0.385817	-0.378775
1.706	-0.313605	-0.32063	-0.328356	-0.357744	-0.385004	-0.37847
1.707	-0.31331	-0.319308	-0.3275	-0.357159	-0.384086	-0.378455
1.708	-0.31277	-0.318346	-0.326535	-0.35664	-0.383167	-0.37866
1.709	-0.311984	-0.317948	-0.325565	-0.356116	-0.382347	-0.378841
1.71	-0.311047	-0.31799	-0.324715	-0.35553	-0.381584	-0.378789
1.711	-0.310043	-0.318139	-0.32409	-0.354896	-0.380698	-0.378406
1.712	-0.309007	-0.318008	-0.323765	-0.354259	-0.379557	-0.377718
1.713	-0.307973	-0.317388	-0.323761	-0.353664	-0.378267	-0.376872
1.714	-0.307032	-0.316376	-0.324005	-0.353117	-0.377032	-0.375989
1.715	-0.306345	-0.31526	-0.32432	-0.352534	-0.375947	-0.375067
1.716	-0.306044	-0.314362	-0.324535	-0.351838	-0.375014	-0.374013
1.717	-0.306097	-0.313848	-0.324566	-0.351051	-0.374244	-0.372723
1.718	-0.306324	-0.313645	-0.324411	-0.350196	-0.373626	-0.371164
1.719	-0.306565	-0.313625	-0.324145	-0.349282	-0.373077	-0.369404
1.72	-0.306796	-0.313671	-0.32385	-0.348462	-0.372523	-0.367598
1.721	-0.307021	-0.313594	-0.323562	-0.347927	-0.371942	-0.365969
1.722	-0.307121	-0.313333	-0.323214	-0.347625	-0.371306	-0.364682
1.723	-0.306935	-0.313061	-0.322649	-0.347338	-0.370626	-0.363747
1.724	-0.306424	-0.312917	-0.321793	-0.34698	-0.36993	-0.363083
1.725	-0.305639	-0.312816	-0.320755	-0.346559	-0.369242	-0.362587
1.726	-0.304694	-0.312583	-0.319662	-0.346038	-0.368549	-0.362096
1.727	-0.303706	-0.312091	-0.31851	-0.345364	-0.367764	-0.361493
1.728	-0.302645	-0.311287	-0.317258	-0.344497	-0.366817	-0.360804
1.729	-0.30144	-0.310265	-0.315974	-0.343388	-0.36575	-0.360079
1.73	-0.300121	-0.309221	-0.314849	-0.342026	-0.364719	-0.359295
1.731	-0.298862	-0.30836	-0.314047	-0.340543	-0.363798	-0.358388
1.732	-0.297882	-0.307858	-0.313493	-0.339164	-0.362866	-0.357348
1.733	-0.297225	-0.307798	-0.312979	-0.338013	-0.361883	-0.356248
1.734	-0.296823	-0.308129	-0.312418	-0.337076	-0.360976	-0.355226
1.735	-0.296681	-0.308673	-0.311769	-0.336262	-0.360228	-0.354456
1.736	-0.296818	-0.309206	-0.310941	-0.335444	-0.35966	-0.354008
1.737	-0.297174	-0.309604	-0.309993	-0.334614	-0.35922	-0.353766
1.738	-0.297602	-0.309743	-0.309152	-0.333903	-0.358792	-0.353557
1.739	-0.297925	-0.309433	-0.308504	-0.333356	-0.358366	-0.353382
1.74	-0.298028	-0.308633	-0.307907	-0.332843	-0.357971	-0.353348
1.741	-0.297913	-0.307507	-0.307331	-0.332217	-0.357556	-0.353367
1.742	-0.297654	-0.306252	-0.306985	-0.331496	-0.357061	-0.353188
1.743	-0.297289	-0.305015	-0.307029	-0.330786	-0.356426	-0.352657
1.744	-0.296789	-0.303865	-0.307371	-0.330099	-0.355606	-0.351758
1.745	-0.296068	-0.302778	-0.307832	-0.329433	-0.354531	-0.350569
1.746	-0.295092	-0.301734	-0.308305	-0.328802	-0.353103	-0.349312
1.747	-0.293967	-0.300813	-0.308694	-0.328175	-0.351393	-0.348212
1.748	-0.292824	-0.300134	-0.30893	-0.327566	-0.349699	-0.347318
1.749	-0.291754	-0.299675	-0.30897	-0.327007	-0.348312	-0.346551
1.75	-0.290905	-0.299312	-0.308741	-0.326468	-0.347288	-0.345828
1.751	-0.29038	-0.299093	-0.308257	-0.325937	-0.346505	-0.34511
1.752	-0.290074	-0.299239	-0.307673	-0.325502	-0.34591	-0.344379
1.753	-0.289784	-0.299773	-0.307119	-0.325216	-0.345529	-0.343546
1.754	-0.289427	-0.300461	-0.30663	-0.325044	-0.345272	-0.342452
1.755	-0.289082	-0.301037	-0.306174	-0.325025	-0.344986	-0.341069
1.756	-0.288857	-0.301244	-0.305631	-0.32523	-0.344615	-0.339546
1.757	-0.288798	-0.300888	-0.3049	-0.325617	-0.344241	-0.338082
1.758	-0.288895	-0.299988	-0.304036	-0.326095	-0.343983	-0.336848
1.759	-0.289088	-0.298742	-0.303188	-0.326509	-0.343802	-0.33586
1.76	-0.289222	-0.297344	-0.302439	-0.326643	-0.34351	-0.334999
1.761	-0.289096	-0.295905	-0.301759	-0.326422	-0.34301	-0.334238
1.762	-0.288593	-0.294555	-0.301086	-0.32593	-0.342391	-0.333651
1.763	-0.28777	-0.293466	-0.300463	-0.325211	-0.341779	-0.333284
1.764	-0.286789	-0.292733	-0.300041	-0.324246	-0.341203	-0.333146
1.765	-0.285785	-0.292339	-0.299969	-0.323031	-0.340636	-0.333199
1.766	-0.284872	-0.292234	-0.300269	-0.321576	-0.340037	-0.333357
1.767	-0.284139	-0.292463	-0.300757	-0.32001	-0.339418	-0.333541
1.768	-0.283614	-0.293143	-0.301158	-0.318632	-0.338829	-0.333719
1.769	-0.283285	-0.294256	-0.301329	-0.317675	-0.338231	-0.333863
1.77	-0.283083	-0.295509	-0.301398	-0.317132	-0.337604	-0.333928
1.771	-0.282891	-0.29651	-0.301564	-0.31681	-0.337046	-0.33386
1.772	-0.282637	-0.297068	-0.301807	-0.316469	-0.336617	-0.333559
1.773	-0.2823	-0.297222	-0.301958	-0.315913	-0.336281	-0.332951
1.774	-0.281868	-0.297071	-0.301914	-0.315062	-0.335986	-0.33214
1.775	-0.28133	-0.296632	-0.301705	-0.313976	-0.335697	-0.331283
1.776	-0.280702	-0.295857	-0.301394	-0.312786	-0.335332	-0.330376
1.777	-0.2801	-0.294789	-0.301001	-0.311664	-0.334803	-0.329351
1.778	-0.279609	-0.293566	-0.300595	-0.310758	-0.334208	-0.328198
1.779	-0.279176	-0.292355	-0.300246	-0.310125	-0.333715	-0.326907
1.78	-0.278789	-0.291364	-0.299857	-0.309716	-0.333358	-0.325491
1.781	-0.27843	-0.290697	-0.299323	-0.309453	-0.333147	-0.324094
1.782	-0.277956	-0.290314	-0.298725	-0.309341	-0.333074	-0.322952
1.783	-0.277251	-0.290139	-0.298178	-0.309446	-0.33306	-0.3222
1.784	-0.276395	-0.290107	-0.29763	-0.309699	-0.333063	-0.321777
1.785	-0.275594	-0.29016	-0.296898	-0.309912	-0.333102	-0.321544
1.786	-0.274972	-0.290257	-0.295842	-0.310008	-0.333141	-0.321391
1.787	-0.274549	-0.290355	-0.294529	-0.310029	-0.333027	-0.321255
1.788	-0.274302	-0.290361	-0.293236	-0.310005	-0.332609	-0.321068
1.789	-0.274111	-0.290164	-0.292258	-0.309854	-0.331836	-0.320712
1.79	-0.273863	-0.289698	-0.291716	-0.309353	-0.33068	-0.320082
1.791	-0.273612	-0.288932	-0.291556	-0.308359	-0.329141	-0.319143
1.792	-0.273418	-0.287942	-0.291641	-0.306998	-0.327337	-0.317907
1.793	-0.273202	-0.286885	-0.29182	-0.305515	-0.325445	-0.316421
1.794	-0.272844	-0.285828	-0.292019	-0.304055	-0.32358	-0.314779
1.795	-0.272282	-0.284768	-0.292318	-0.302683	-0.32182	-0.313134
1.796	-0.271553	-0.283739	-0.292841	-0.301482	-0.320216	-0.311621
1.797	-0.270749	-0.282786	-0.293509	-0.300492	-0.318741	-0.310273
1.798	-0.269918	-0.281851	-0.294085	-0.299678	-0.317348	-0.309049
1.799	-0.269041	-0.280878	-0.294426	-0.299012	-0.316009	-0.307942
1.8	-0.268077	-0.279958	-0.294485	-0.298497	-0.314726	-0.307014
1.801	-0.266986	-0.279167	-0.294229	-0.298167	-0.313553	-0.306328
1.802	-0.265816	-0.278419	-0.293584	-0.298059	-0.312506	-0.305925
1.803	-0.264717	-0.277611	-0.292457	-0.298123	-0.311564	-0.305832
1.804	-0.263803	-0.276769	-0.2909	-0.298257	-0.310717	-0.306004
1.805	-0.263086	-0.276011	-0.289054	-0.298367	-0.309945	-0.306373
1.806	-0.262547	-0.275458	-0.287067	-0.298343	-0.309236	-0.306966
1.807	-0.262207	-0.275096	-0.285111	-0.298079	-0.308584	-0.307811
1.808	-0.262046	-0.274762	-0.283334	-0.297506	-0.308019	-0.308794
1.809	-0.261977	-0.274311	-0.281862	-0.296623	-0.307656	-0.309706
1.81	-0.26191	-0.273647	-0.280786	-0.295489	-0.307583	-0.310329
1.811	-0.261763	-0.272647	-0.280103	-0.294201	-0.30772	-0.310464
1.812	-0.261505	-0.271319	-0.279724	-0.292871	-0.307908	-0.310023
1.813	-0.261162	-0.269811	-0.279542	-0.291635	-0.30801	-0.309055
1.814	-0.260784	-0.26825	-0.27945	-0.290683	-0.307957	-0.307695
1.815	-0.260476	-0.266844	-0.279374	-0.290109	-0.307806	-0.306167
1.816	-0.260322	-0.265947	-0.279331	-0.28983	-0.307679	-0.304696
1.817	-0.260271	-0.265803	-0.279366	-0.289722	-0.307619	-0.303369
1.818	-0.260233	-0.266301	-0.279484	-0.28967	-0.307566	-0.302154
1.819	-0.260231	-0.267071	-0.279693	-0.289623	-0.307444	-0.301043
1.82	-0.260326	-0.267809	-0.280021	-0.289676	-0.307208	-0.300135
1.821	-0.26039	-0.268356	-0.280436	-0.289921	-0.306821	-0.299536
1.822	-0.260237	-0.268566	-0.280767	-0.290257	-0.306265	-0.299277
1.823	-0.259892	-0.268299	-0.280824	-0.290483	-0.305584	-0.299286
1.824	-0.259454	-0.267557	-0.280589	-0.290472	-0.304879	-0.299411
1.825	-0.258839	-0.266448	-0.280164	-0.290177	-0.304232	-0.299511
1.826	-0.257917	-0.265107	-0.279608	-0.289563	-0.303595	-0.299447
1.827	-0.256754	-0.263787	-0.278919	-0.288706	-0.302877	-0.299138
1.828	-0.255533	-0.262836	-0.278119	-0.287783	-0.302069	-0.298648
1.829	-0.254391	-0.26245	-0.277356	-0.286898	-0.301175	-0.298146
1.83	-0.253462	-0.262576	-0.276872	-0.286049	-0.300191	-0.297737
1.831	-0.252873	-0.263031	-0.276853	-0.28517	-0.299141	-0.297416
1.832	-0.252592	-0.263631	-0.277248	-0.284152	-0.298103	-0.297133
1.833	-0.252504	-0.264265	-0.27777	-0.282991	-0.297225	-0.296843
1.834	-0.252628	-0.264925	-0.278162	-0.281856	-0.296598	-0.296567
1.835	-0.253002	-0.265679	-0.278348	-0.280869	-0.296179	-0.296336
1.836	-0.253474	-0.266516	-0.278274	-0.280046	-0.295869	-0.29611
1.837	-0.253773	-0.267207	-0.277803	-0.279412	-0.295565	-0.295904
1.838	-0.253737	-0.267511	-0.276859	-0.278988	-0.295181	-0.295809
1.839	-0.25345	-0.267405	-0.27557	-0.278739	-0.294674	-0.295814
1.84	-0.253102	-0.266965	-0.274198	-0.278628	-0.294079	-0.295809
1.841	-0.252819	-0.266195	-0.272876	-0.278675	-0.293486	-0.295713
1.842	-0.252628	-0.26508	-0.271539	-0.27893	-0.293032	-0.29549
1.843	-0.252514	-0.263669	-0.270188	-0.279406	-0.29281	-0.29514
1.844	-0.252413	-0.262051	-0.269024	-0.279986	-0.292678	-0.294704
1.845	-0.252188	-0.260349	-0.268289	-0.280445	-0.292369	-0.294207
1.846	-0.251822	-0.258738	-0.268066	-0.280682	-0.291819	-0.293695
1.847	-0.251418	-0.257385	-0.268285	-0.28077	-0.291216	-0.293251
1.848	-0.250996	-0.256317	-0.268792	-0.280837	-0.290742	-0.292844
1.849	-0.25054	-0.255472	-0.269279	-0.280936	-0.290437	-0.292328
1.85	-0.250056	-0.254933	-0.269422	-0.281002	-0.290228	-0.291625
1.851	-0.249555	-0.254814	-0.26917	-0.28088	-0.289965	-0.290754
1.852	-0.249064	-0.255034	-0.268708	-0.280372	-0.289512	-0.289778
1.853	-0.248607	-0.255469	-0.268136	-0.279445	-0.28884	-0.288816
1.854	-0.248188	-0.256061	-0.267394	-0.278331	-0.288058	-0.287989
1.855	-0.247782	-0.256703	-0.266492	-0.277195	-0.287253	-0.287365
1.856	-0.247311	-0.257206	-0.265602	-0.275994	-0.286434	-0.286961
1.857	-0.246685	-0.257445	-0.264935	-0.274754	-0.285597	-0.286691
1.858	-0.245886	-0.257457	-0.264566	-0.273607	-0.284692	-0.286369
1.859	-0.245036	-0.257318	-0.264433	-0.272642	-0.283696	-0.285859
1.86	-0.244338	-0.257063	-0.264531	-0.271836	-0.28274	-0.285157
1.861	-0.243927	-0.256727	-0.264914	-0.271109	-0.281987	-0.284343
1.862	-0.243788	-0.256323	-0.265514	-0.270458	-0.281448	-0.283495
1.863	-0.243823	-0.255879	-0.266128	-0.269951	-0.281035	-0.282683
1.864	-0.243965	-0.255489	-0.266585	-0.269615	-0.280727	-0.281988
1.865	-0.244177	-0.255242	-0.266823	-0.269385	-0.280495	-0.281439
1.866	-0.24446	-0.255138	-0.266865	-0.269203	-0.280218	-0.281006
1.867	-0.244793	-0.255086	-0.266777	-0.269109	-0.279874	-0.280585
1.868	-0.245033	-0.254988	-0.266581	-0.269164	-0.279591	-0.28003
1.869	-0.244971	-0.25476	-0.266229	-0.269364	-0.279454	-0.279389
1.87	-0.244522	-0.254379	-0.26568	-0.269638	-0.279423	-0.27885
1.871	-0.243863	-0.253916	-0.264942	-0.269894	-0.279418	-0.278492
1.872	-0.243247	-0.253391	-0.264069	-0.270056	-0.279354	-0.278235
1.873	-0.242716	-0.252822	-0.263258	-0.269991	-0.279134	-0.277888
1.874	-0.242156	-0.252337	-0.2628	-0.269498	-0.278687	-0.277315
1.875	-0.241504	-0.25203	-0.262763	-0.268459	-0.277988	-0.276608
1.876	-0.240802	-0.251828	-0.262977	-0.266937	-0.277017	-0.275948
1.877	-0.240102	-0.251521	-0.263302	-0.265115	-0.275819	-0.275387
1.878	-0.239377	-0.250915	-0.263747	-0.263221	-0.274578	-0.274894
1.879	-0.238653	-0.250037	-0.264377	-0.261445	-0.273575	-0.274425
1.88	-0.238051	-0.249142	-0.265155	-0.259897	-0.273052	-0.273953
1.881	-0.237573	-0.248472	-0.265906	-0.258653	-0.273085	-0.273454
1.882	-0.23713	-0.24811	-0.266389	-0.257741	-0.273662	-0.272873
1.883	-0.236787	-0.248012	-0.266453	-0.257171	-0.274768	-0.272182
1.884	-0.23674	-0.248114	-0.266126	-0.25696	-0.276305	-0.271387
1.885	-0.237026	-0.248398	-0.265475	-0.257066	-0.277985	-0.270588
1.886	-0.237455	-0.248758	-0.26457	-0.257372	-0.279413	-0.269989
1.887	-0.237881	-0.248918	-0.26358	-0.257732	-0.280326	-0.269736
1.888	-0.238327	-0.248661	-0.262732	-0.258093	-0.280735	-0.269796
1.889	-0.238792	-0.248005	-0.262171	-0.258557	-0.280758	-0.270006
1.89	-0.239198	-0.247017	-0.261888	-0.25913	-0.280446	-0.270204
1.891	-0.239484	-0.245807	-0.261734	-0.259612	-0.279794	-0.270347
1.892	-0.239643	-0.244647	-0.261534	-0.259898	-0.278814	-0.270464
1.893	-0.239679	-0.243769	-0.261262	-0.260056	-0.277595	-0.270554
1.894	-0.239531	-0.243152	-0.261025	-0.260139	-0.27628	-0.270639
1.895	-0.239107	-0.242599	-0.260939	-0.260176	-0.274954	-0.270794
1.896	-0.238471	-0.242065	-0.261075	-0.260236	-0.273648	-0.27104
1.897	-0.237828	-0.241777	-0.261416	-0.260399	-0.272408	-0.271286
1.898	-0.237269	-0.241896	-0.261796	-0.260682	-0.271288	-0.271398
1.899	-0.236753	-0.242354	-0.261979	-0.260991	-0.27032	-0.271348
1.9	-0.236374	-0.243075	-0.261806	-0.261221	-0.269558	-0.271211
1.901	-0.236311	-0.244067	-0.261254	-0.261332	-0.26908	-0.27105
1.902	-0.236571	-0.24534	-0.260427	-0.261261	-0.268944	-0.2709
1.903	-0.236973	-0.246772	-0.259473	-0.260952	-0.269137	-0.270758
1.904	-0.237271	-0.248194	-0.258414	-0.260456	-0.26956	-0.27059
1.905	-0.237359	-0.249567	-0.257116	-0.259826	-0.270043	-0.270426
1.906	-0.237299	-0.250796	-0.255445	-0.259033	-0.270411	-0.270301
1.907	-0.237153	-0.251623	-0.253505	-0.258081	-0.270591	-0.270111
1.908	-0.236946	-0.251917	-0.251666	-0.257033	-0.270564	-0.269713
1.909	-0.236703	-0.25176	-0.2503	-0.255921	-0.270287	-0.269067
1.91	-0.236415	-0.251291	-0.249492	-0.254734	-0.269728	-0.268203
1.911	-0.236055	-0.25066	-0.249117	-0.253486	-0.26891	-0.267199
1.912	-0.235649	-0.250039	-0.249114	-0.25228	-0.267889	-0.266203
1.913	-0.235277	-0.249503	-0.249451	-0.251319	-0.266715	-0.265293
1.914	-0.234927	-0.248947	-0.249986	-0.25073	-0.265479	-0.264348
1.915	-0.23444	-0.248275	-0.250542	-0.250435	-0.264331	-0.263271
1.916	-0.233697	-0.247508	-0.251034	-0.250224	-0.263374	-0.262128
1.917	-0.23279	-0.246735	-0.251435	-0.249959	-0.262577	-0.261004
1.918	-0.231908	-0.246024	-0.251737	-0.249679	-0.261882	-0.259964
1.919	-0.231035	-0.245372	-0.251987	-0.249511	-0.261354	-0.259069
1.92	-0.229997	-0.244776	-0.252219	-0.249478	-0.261066	-0.258363
1.921	-0.228836	-0.244239	-0.252387	-0.249444	-0.260977	-0.257887
1.922	-0.2278	-0.243755	-0.252456	-0.249261	-0.261077	-0.257706
1.923	-0.227063	-0.243376	-0.252438	-0.24889	-0.261324	-0.257905
1.924	-0.226675	-0.243095	-0.252376	-0.248414	-0.26152	-0.258459
1.925	-0.226581	-0.242755	-0.252255	-0.247934	-0.261462	-0.259129
1.926	-0.226616	-0.242195	-0.251964	-0.247496	-0.261085	-0.259642
1.927	-0.226575	-0.241335	-0.251446	-0.247123	-0.260524	-0.25984
1.928	-0.226381	-0.240149	-0.250812	-0.246813	-0.260045	-0.259639
1.929	-0.226126	-0.238701	-0.25023	-0.24655	-0.25981	-0.258985
1.93	-0.225891	-0.2371	-0.249764	-0.246327	-0.259786	-0.257908
1.931	-0.225641	-0.235506	-0.249344	-0.246093	-0.259828	-0.256596
1.932	-0.225355	-0.234236	-0.248942	-0.245814	-0.259761	-0.255313
1.933	-0.225127	-0.233497	-0.248673	-0.245568	-0.259445	-0.254225
1.934	-0.224973	-0.233169	-0.24858	-0.245442	-0.258838	-0.253378
1.935	-0.224725	-0.233048	-0.248437	-0.245422	-0.257979	-0.252684
1.936	-0.224334	-0.23308	-0.247946	-0.245434	-0.256992	-0.252041
1.937	-0.223936	-0.233251	-0.247038	-0.245428	-0.256058	-0.251464
1.938	-0.223619	-0.233443	-0.245844	-0.245349	-0.255279	-0.250914
1.939	-0.22342	-0.233528	-0.244524	-0.245106	-0.254639	-0.250263
1.94	-0.22329	-0.233429	-0.243193	-0.244631	-0.254045	-0.249532
1.941	-0.223064	-0.233079	-0.241936	-0.243886	-0.253431	-0.248917
1.942	-0.222682	-0.232431	-0.240879	-0.242898	-0.252889	-0.248533
1.943	-0.222197	-0.231453	-0.240172	-0.241826	-0.252527	-0.248375
1.944	-0.221674	-0.230187	-0.239779	-0.240847	-0.252318	-0.248487
1.945	-0.221267	-0.228851	-0.239485	-0.240062	-0.252162	-0.248952
1.946	-0.221177	-0.227691	-0.239232	-0.239511	-0.251945	-0.249714
1.947	-0.221513	-0.226745	-0.239181	-0.239202	-0.251574	-0.250527
1.948	-0.222236	-0.225914	-0.239389	-0.239115	-0.251079	-0.25112
1.949	-0.223154	-0.225151	-0.239654	-0.2392	-0.250575	-0.251421
1.95	-0.224018	-0.224553	-0.23968	-0.239405	-0.250072	-0.251496
1.951	-0.224619	-0.224271	-0.239333	-0.239682	-0.249519	-0.251381
1.952	-0.224827	-0.22429	-0.238737	-0.239996	-0.248918	-0.251103
1.953	-0.22467	-0.224416	-0.238151	-0.240357	-0.248316	-0.250723
1.954	-0.224332	-0.224507	-0.237759	-0.240793	-0.247819	-0.250259
1.955	-0.224074	-0.224605	-0.237562	-0.241246	-0.247508	-0.249745
1.956	-0.224092	-0.224847	-0.23739	-0.241537	-0.247346	-0.249279
1.957	-0.22432	-0.225343	-0.237004	-0.241515	-0.247293	-0.248897
1.958	-0.224479	-0.2261	-0.236293	-0.241216	-0.247338	-0.248508
1.959	-0.224385	-0.227004	-0.235339	-0.240792	-0.247428	-0.247954
1.96	-0.224003	-0.227888	-0.234333	-0.240322	-0.247458	-0.247103
1.961	-0.223335	-0.228565	-0.23344	-0.239742	-0.247303	-0.245951
1.962	-0.222527	-0.228866	-0.23274	-0.238984	-0.246945	-0.244641
1.963	-0.221843	-0.228748	-0.232289	-0.238087	-0.246559	-0.243371
1.964	-0.221409	-0.228322	-0.232029	-0.237192	-0.246322	-0.242269
1.965	-0.221191	-0.227689	-0.231747	-0.236528	-0.246208	-0.241409
1.966	-0.22117	-0.226845	-0.231372	-0.236203	-0.246039	-0.240818
1.967	-0.221274	-0.22582	-0.230994	-0.236092	-0.245696	-0.240435
1.968	-0.22137	-0.224754	-0.230608	-0.23608	-0.245229	-0.240173
1.969	-0.221393	-0.223761	-0.230158	-0.23617	-0.244734	-0.239985
1.97	-0.221258	-0.222877	-0.229642	-0.236308	-0.244281	-0.23985
1.971	-0.220886	-0.222168	-0.229104	-0.236335	-0.243961	-0.239724
1.972	-0.220408	-0.221706	-0.228691	-0.236081	-0.243812	-0.239526
1.973	-0.219986	-0.221404	-0.228576	-0.235496	-0.243703	-0.239201
1.974	-0.219534	-0.221119	-0.228812	-0.234644	-0.243451	-0.238763
1.975	-0.218911	-0.220902	-0.229299	-0.233531	-0.243003	-0.238305
1.976	-0.218119	-0.220826	-0.229821	-0.232135	-0.242466	-0.237917
1.977	-0.217238	-0.220778	-0.230227	-0.230611	-0.242026	-0.237586
1.978	-0.216354	-0.220639	-0.23058	-0.229176	-0.241798	-0.237131
1.979	-0.215481	-0.220454	-0.230981	-0.227963	-0.241777	-0.236338
1.98	-0.214588	-0.220311	-0.231427	-0.227111	-0.241898	-0.235213
1.981	-0.213725	-0.220279	-0.231896	-0.226715	-0.242045	-0.23393
1.982	-0.213015	-0.22043	-0.232353	-0.226692	-0.242097	-0.23265
1.983	-0.212509	-0.220732	-0.232716	-0.226852	-0.242006	-0.231479
1.984	-0.212165	-0.221069	-0.232857	-0.227068	-0.241818	-0.230451
1.985	-0.21195	-0.221393	-0.232575	-0.227267	-0.241599	-0.229618
1.986	-0.211804	-0.221721	-0.231698	-0.227376	-0.241395	-0.229102
1.987	-0.211552	-0.222034	-0.230276	-0.227347	-0.241209	-0.228979
1.988	-0.211128	-0.222242	-0.228522	-0.227223	-0.240926	-0.229186
1.989	-0.210777	-0.222281	-0.226648	-0.22711	-0.240455	-0.229566
1.99	-0.210764	-0.222145	-0.224809	-0.227055	-0.239823	-0.230035
1.991	-0.211016	-0.221838	-0.223171	-0.227074	-0.239035	-0.230602
1.992	-0.211231	-0.221329	-0.221933	-0.227206	-0.238026	-0.231262
1.993	-0.211203	-0.220509	-0.221228	-0.227464	-0.236719	-0.231969
1.994	-0.210868	-0.219347	-0.221037	-0.227765	-0.23517	-0.232623
1.995	-0.210181	-0.218017	-0.221144	-0.227895	-0.233619	-0.233116
1.996	-0.209167	-0.216781	-0.221309	-0.227695	-0.232321	-0.233388
1.997	-0.207977	-0.215838	-0.221504	-0.227166	-0.231391	-0.233436
1.998	-0.206828	-0.215334	-0.221827	-0.226365	-0.230776	-0.233326
[truncated: 1,001 more rows]

## Sheet: WT_pH6.4_surfer_traces
time (s)	current (nA)
0	4.80126e-05	-5.90607e-05	-7.01373e-05	2.95517e-05	2.58595e-05	-1.84467e-05
0.001	0.000283883	-0.000369074	-0.00046183	0.000192057	0.000135293	-8.06593e-05
0.002	0.000825117	-0.00110554	-0.00144099	0.000646422	0.000315713	-0.000137342
0.003	0.00169161	-0.00227619	-0.00296967	0.00154548	0.000483914	-0.000128454
0.004	0.0028928	-0.0038327	-0.00478893	0.0029267	0.000648759	-0.000104936
0.005	0.00439763	-0.00569818	-0.00676826	0.00463175	0.000907586	-0.000111179
0.006	0.00612487	-0.00773573	-0.00900705	0.00643045	0.00133044	-0.000122341
0.007	0.00803879	-0.00982794	-0.0115821	0.00816445	0.00193007	-0.000153817
0.008	0.0100545	-0.0119044	-0.0143516	0.00975126	0.00267551	-0.000262024
0.009	0.0119114	-0.0139704	-0.0170944	0.0111743	0.00348382	-0.000449357
0.01	0.0132756	-0.0161002	-0.0196328	0.0124176	0.00419135	-0.000665161
0.011	0.0140263	-0.0182976	-0.021793	0.01342	0.00460482	-0.000881026
0.012	0.0143234	-0.0204529	-0.0233947	0.0142062	0.00459606	-0.00105836
0.013	0.0142692	-0.0224633	-0.0242768	0.0148963	0.00416877	-0.0011371
0.014	0.0137675	-0.0242509	-0.0243489	0.0155437	0.00345399	-0.0011226
0.015	0.0127984	-0.025663	-0.0237147	0.0161307	0.00262478	-0.0010343
0.016	0.011577	-0.0264296	-0.0227018	0.0166239	0.00180418	-0.000798542
0.017	0.0103319	-0.0263173	-0.0215995	0.0169698	0.000997974	-0.000364559
0.018	0.009117	-0.0254081	-0.020415	0.0171408	0.000233389	0.000202497
0.019	0.00799621	-0.0240255	-0.0190057	0.0171491	-0.000267292	0.00085903
0.02	0.00714605	-0.0223856	-0.0172926	0.0169602	-0.000317456	0.00158779
0.021	0.00666213	-0.020573	-0.0153363	0.0165203	3.40111e-05	0.00227173
0.022	0.00647965	-0.0187016	-0.0133505	0.0159149	0.000599124	0.00272801
0.023	0.00651663	-0.016909	-0.0115324	0.0153366	0.00111043	0.00284251
0.024	0.00677657	-0.0152441	-0.00988808	0.0149493	0.00138039	0.0026644
0.025	0.00725847	-0.0136031	-0.00834329	0.0148641	0.00141305	0.00234833
0.026	0.00788379	-0.0118249	-0.00699166	0.0150829	0.00131563	0.00202465
0.027	0.00853998	-0.00981375	-0.00605077	0.0155016	0.00121665	0.0018045
0.028	0.00913671	-0.00764079	-0.00553638	0.0160245	0.00116856	0.00173815
0.029	0.00963856	-0.00559707	-0.00524147	0.016567	0.00114919	0.00173715
0.03	0.0099909	-0.00398556	-0.00501469	0.0170431	0.00115441	0.00172352
0.031	0.0100438	-0.00286163	-0.00481587	0.0174271	0.00124137	0.00171315
0.032	0.00966414	-0.00210802	-0.00464665	0.0177421	0.00147172	0.00173277
0.033	0.00883363	-0.00164096	-0.00459644	0.0179913	0.00184253	0.00179579
0.034	0.00768524	-0.00136963	-0.00472748	0.0180945	0.00235057	0.00188727
0.035	0.00653643	-0.00115545	-0.00493464	0.017923	0.00303397	0.00197853
0.036	0.00571572	-0.000907189	-0.00504723	0.0174456	0.00390679	0.00208176
0.037	0.00539857	-0.000612498	-0.00491074	0.0167276	0.00486057	0.00225852
0.038	0.00558825	-0.000348047	-0.00439846	0.0158048	0.00570489	0.0026014
0.039	0.00618059	-0.000215763	-0.00344273	0.014712	0.00632993	0.00311823
0.04	0.00711119	-0.000210822	-0.00215595	0.0136045	0.00674769	0.00365962
0.041	0.00831926	-0.000224996	-0.000868066	0.0126962	0.00702713	0.00404898
0.042	0.00963318	-0.000197793	0.000159968	0.0120912	0.00724294	0.00413735
0.043	0.0108468	-0.000206617	0.000903883	0.0117923	0.00745691	0.00385077
0.044	0.0117951	-0.000390973	0.0014272	0.0117666	0.00763072	0.00331416
0.045	0.0123524	-0.000752845	0.001785	0.0119752	0.00760879	0.00275457
0.046	0.0124991	-0.00110959	0.00199108	0.0123942	0.00729827	0.00232366
0.047	0.0123246	-0.00131953	0.00201676	0.0129358	0.00678451	0.00210215
0.048	0.0119718	-0.00134067	0.00195911	0.0134357	0.00621865	0.00216528
0.049	0.0116302	-0.00116083	0.00203373	0.0137783	0.00567913	0.00256864
0.05	0.0114219	-0.000826977	0.00222132	0.0139745	0.00519447	0.00333828
0.051	0.0113248	-0.000392577	0.00220774	0.0141411	0.00477632	0.00448731
0.052	0.0112811	0.000130901	0.00182741	0.0143923	0.00443159	0.00587476
0.053	0.0112984	0.000775978	0.00128312	0.0147345	0.00416576	0.00712872
0.054	0.0114346	0.00160615	0.000831925	0.0151474	0.00395512	0.00790362
0.055	0.0117273	0.00259623	0.000482986	0.0156637	0.00382509	0.00811018
0.056	0.0121207	0.00358123	3.61042e-05	0.0162824	0.00384046	0.00788718
0.057	0.0124516	0.00437369	-0.000658137	0.016971	0.00394186	0.00745278
0.058	0.0125932	0.00486296	-0.00154488	0.017735	0.00400626	0.00695791
0.059	0.0125816	0.00502711	-0.00253735	0.0185456	0.00401965	0.00645821
0.06	0.0125234	0.00490184	-0.00366288	0.0192701	0.00403656	0.00600289
0.061	0.0124275	0.0045444	-0.00492891	0.0197073	0.00407772	0.00566334
0.062	0.0122321	0.00399527	-0.00618032	0.0197195	0.00414259	0.00543657
0.063	0.0120257	0.00331088	-0.00718572	0.0194198	0.0042963	0.00518552
0.064	0.0119318	0.00264028	-0.00783551	0.0190686	0.00467613	0.00477251
0.065	0.0117557	0.00212814	-0.00817809	0.0188345	0.0053343	0.00418891
0.066	0.0111949	0.00181613	-0.00828747	0.0187635	0.00613873	0.0035479
0.067	0.0103156	0.00169557	-0.00821343	0.0187711	0.00690326	0.0030689
0.068	0.00948977	0.0017204	-0.00803847	0.018713	0.00750541	0.00289485
0.069	0.00897882	0.00182377	-0.00786843	0.0185152	0.00788422	0.00296505
0.07	0.00875098	0.00200882	-0.00782199	0.0181914	0.00804339	0.00320157
0.071	0.00861617	0.00232468	-0.00797994	0.0177954	0.00805877	0.00358674
0.072	0.00846013	0.00269871	-0.00826544	0.0173933	0.00803775	0.00410433
0.073	0.00832087	0.0029982	-0.00855471	0.0170783	0.00799486	0.00473063
0.074	0.00823802	0.00326271	-0.00890392	0.0169067	0.00782365	0.00539801
0.075	0.00810515	0.00357464	-0.00951876	0.0168488	0.00745548	0.00599409
0.076	0.00769086	0.00386823	-0.0105694	0.016897	0.00697016	0.00639579
0.077	0.00682724	0.0040709	-0.0120964	0.0171056	0.0064889	0.00647327
0.078	0.00553139	0.00418483	-0.0139961	0.0175177	0.00600925	0.00613661
0.079	0.00390073	0.00425005	-0.0161152	0.0181156	0.00547805	0.0054348
0.08	0.00207372	0.00431873	-0.0183746	0.0187474	0.00496012	0.00454434
0.081	0.000266689	0.00435752	-0.0206833	0.0192099	0.0045851	0.0036015
0.082	-0.00139558	0.0042558	-0.0229214	0.0194181	0.00440031	0.00265235
0.083	-0.00291259	0.00392801	-0.0251379	0.0193266	0.00433204	0.00177378
0.084	-0.00415033	0.00330762	-0.0274581	0.0188874	0.00424203	0.00106556
0.085	-0.00489877	0.00233922	-0.0297996	0.0181689	0.00402112	0.000633312
0.086	-0.00518704	0.00108114	-0.0319249	0.0173393	0.00370413	0.000613126
0.087	-0.00523	-0.000286114	-0.033584	0.0165703	0.00343698	0.00097434
0.088	-0.00511865	-0.00161642	-0.0345538	0.0159852	0.00328201	0.00149686
0.089	-0.00472173	-0.00280615	-0.0348194	0.015653	0.00320548	0.00205556
0.09	-0.0039137	-0.003714	-0.0346424	0.0156247	0.0032028	0.0026805
0.091	-0.00282008	-0.00423373	-0.0343365	0.0159057	0.0033133	0.00342332
0.092	-0.00174503	-0.00438969	-0.0341265	0.0163728	0.00348843	0.0041824
0.093	-0.000954035	-0.00433627	-0.0341348	0.016792	0.00350864	0.00466972
0.094	-0.000575797	-0.00428844	-0.03429	0.016991	0.00312248	0.00472784
0.095	-0.000587615	-0.00442001	-0.0343386	0.0170177	0.00221188	0.00441809
0.096	-0.000780564	-0.00477409	-0.0340336	0.0170569	0.000898117	0.00380036
0.097	-0.000877982	-0.0052911	-0.0332612	0.0172078	-0.000470079	0.00294756
0.098	-0.000828202	-0.00593862	-0.032064	0.0173941	-0.00152781	0.0020201
0.099	-0.000783492	-0.00677017	-0.0306235	0.0174995	-0.00207608	0.00123829
0.1	-0.00080307	-0.00781446	-0.0291468	0.0175518	-0.00207606	0.000821217
0.101	-0.000750562	-0.00897479	-0.0277463	0.0176901	-0.00154407	0.000794265
0.102	-0.000438807	-0.0100944	-0.0264892	0.0179512	-0.000539602	0.000993449
0.103	0.000148992	-0.0109993	-0.0254949	0.0181882	0.000726405	0.00137395
0.104	0.000849093	-0.0115383	-0.0249328	0.018232	0.00192573	0.00194512
0.105	0.00153562	-0.0117085	-0.0249179	0.01804	0.00280953	0.00247361
0.106	0.00219396	-0.0115615	-0.0254047	0.017692	0.00329699	0.00270692
0.107	0.00279012	-0.0109752	-0.0262533	0.0173335	0.00339829	0.00270015
0.108	0.00322302	-0.00983565	-0.0273058	0.0170702	0.00313165	0.00265175
0.109	0.00341394	-0.00843051	-0.0283416	0.016896	0.00253299	0.00261128
0.11	0.00339348	-0.00726927	-0.0291255	0.0167814	0.0016616	0.00245728
0.111	0.0033029	-0.00659121	-0.0295112	0.0167275	0.00058754	0.00207754
0.112	0.00320674	-0.00640037	-0.0294915	0.0166872	-0.000588625	0.00148853
0.113	0.00295773	-0.00670045	-0.0292024	0.0165571	-0.0017945	0.000814704
0.114	0.0024485	-0.00747933	-0.0287595	0.0162714	-0.0030556	0.00018626
0.115	0.0018128	-0.00865906	-0.0281149	0.0158745	-0.0043599	-0.000396604
0.116	0.00124958	-0.0100134	-0.0272336	0.0154842	-0.00556893	-0.00106672
0.117	0.000927046	-0.0111972	-0.0262231	0.0151825	-0.00658645	-0.0019413
0.118	0.000998363	-0.0120001	-0.0252073	0.0149934	-0.00742993	-0.00297951
0.119	0.00149397	-0.0124059	-0.0243023	0.0149113	-0.00815318	-0.00400639
0.12	0.00228383	-0.0124425	-0.0236867	0.0148729	-0.00880273	-0.00486968
0.121	0.00316695	-0.0122069	-0.0235672	0.014795	-0.00946098	-0.00554206
0.122	0.00395534	-0.011889	-0.0240195	0.0146924	-0.0102144	-0.00611886
0.123	0.00451392	-0.0116304	-0.0249333	0.0146597	-0.0109717	-0.00667612
0.124	0.00482577	-0.0114601	-0.0261778	0.0147497	-0.0115295	-0.00717389
0.125	0.00499283	-0.0113154	-0.0276689	0.0149535	-0.0118047	-0.00755416
0.126	0.00514037	-0.0111223	-0.0292572	0.0152426	-0.0118623	-0.00781891
0.127	0.00539702	-0.0109115	-0.0306988	0.0155613	-0.0117871	-0.0080045
0.128	0.00588441	-0.0107288	-0.0317727	0.0158245	-0.0116511	-0.00818093
0.129	0.00662116	-0.0105102	-0.0323343	0.0159992	-0.0115595	-0.00851551
0.13	0.00743355	-0.0102355	-0.0323591	0.0161054	-0.0115865	-0.00916419
0.131	0.00805615	-0.01	-0.0319907	0.0161198	-0.0116959	-0.0100529
0.132	0.008333	-0.00989536	-0.0313706	0.016031	-0.0117033	-0.0109784
0.133	0.0082841	-0.0100658	-0.0305119	0.0159117	-0.01141	-0.011858
0.134	0.00805004	-0.010654	-0.0294366	0.0158295	-0.0107647	-0.0126333
0.135	0.00776923	-0.0115296	-0.0283211	0.0157695	-0.009714	-0.0130775
0.136	0.00751339	-0.0123535	-0.0274128	0.0157035	-0.00817562	-0.012986
0.137	0.00731583	-0.012948	-0.0267327	0.0156299	-0.00627361	-0.0124203
0.138	0.00720947	-0.0133538	-0.0260667	0.0154991	-0.00427416	-0.0116341
0.139	0.00724632	-0.0135163	-0.0253919	0.0152325	-0.00235624	-0.0108916
0.14	0.0074634	-0.0132287	-0.0250085	0.0148497	-0.000633796	-0.0103079
0.141	0.00786957	-0.012393	-0.0251415	0.014515	0.000778348	-0.00981059
0.142	0.00841248	-0.0111056	-0.0257275	0.0143982	0.00187618	-0.00930584
0.143	0.00888186	-0.0095159	-0.0266579	0.0145262	0.00278525	-0.00880435
0.144	0.00899135	-0.00781434	-0.0278993	0.0148477	0.00363579	-0.00834517
0.145	0.00866407	-0.00630437	-0.0293707	0.0153388	0.00447051	-0.00785803
0.146	0.0081619	-0.00518621	-0.0309267	0.0159747	0.00522844	-0.00724306
0.147	0.00784769	-0.00441396	-0.0323615	0.0166636	0.00589208	-0.00655985
0.148	0.00795552	-0.00394924	-0.0334083	0.0172377	0.00651589	-0.0059242
0.149	0.00866132	-0.00392925	-0.0338607	0.0175322	0.007057	-0.00532484
0.15	0.0100688	-0.00450414	-0.0336861	0.0174755	0.00737305	-0.00468355
0.151	0.0120395	-0.00563071	-0.0330443	0.0171225	0.00733005	-0.00399399
0.152	0.0142008	-0.00710061	-0.0322384	0.0165912	0.00691722	-0.00334914
0.153	0.0161496	-0.0087152	-0.0315554	0.0159659	0.0063359	-0.00282214
0.154	0.0177323	-0.0104005	-0.0310957	0.0153592	0.00583649	-0.00237443
0.155	0.0190717	-0.0121571	-0.0308341	0.0149461	0.00551216	-0.00195931
0.156	0.0202684	-0.0138501	-0.0307661	0.014792	0.00531885	-0.00160149
0.157	0.0213191	-0.0151556	-0.0309017	0.014808	0.00512395	-0.00133684
0.158	0.0222435	-0.0158934	-0.0312786	0.0149089	0.00476933	-0.00118539
0.159	0.0229958	-0.0162674	-0.0319675	0.0150687	0.00416368	-0.0011313
0.16	0.0234429	-0.0165185	-0.0329557	0.0153174	0.00327676	-0.00115427
0.161	0.0235117	-0.0166195	-0.0341399	0.0156936	0.00216572	-0.00128057
0.162	0.0231461	-0.0165407	-0.0354481	0.0160888	0.00103141	-0.00154056
0.163	0.0222874	-0.0164327	-0.0368171	0.0163375	6.91977e-05	-0.00194479
0.164	0.0209758	-0.0164003	-0.0381144	0.0164578	-0.000710158	-0.00246639
0.165	0.019339	-0.016357	-0.039223	0.0165404	-0.00139612	-0.0030742
0.166	0.0175564	-0.0161634	-0.0400659	0.0165518	-0.00199975	-0.00373702
0.167	0.0157769	-0.0158106	-0.0405517	0.0164651	-0.00240957	-0.00434901
0.168	0.0140468	-0.0153124	-0.0406281	0.0163549	-0.00247213	-0.00481327
0.169	0.0124647	-0.0145078	-0.0403171	0.0162668	-0.00211791	-0.00510956
0.17	0.0112254	-0.0132975	-0.039734	0.0161908	-0.00145923	-0.00519119
0.171	0.0104115	-0.0118405	-0.0391713	0.0160959	-0.000737703	-0.00495697
0.172	0.00996914	-0.0103216	-0.0390276	0.0159223	-0.000151388	-0.00433092
0.173	0.00981529	-0.00883859	-0.0394803	0.0155864	0.000239576	-0.00337317
0.174	0.00989252	-0.00752451	-0.0403703	0.0150254	0.000464766	-0.00233033
0.175	0.0101742	-0.00654658	-0.0414412	0.0143489	0.000575503	-0.00146894
0.176	0.0105716	-0.00598219	-0.0424999	0.0138053	0.000726413	-0.000918958
0.177	0.0109351	-0.00583355	-0.0434172	0.0135397	0.00117177	-0.000716604
0.178	0.0111479	-0.00608248	-0.0441035	0.0135466	0.0019747	-0.000798377
0.179	0.0111559	-0.00668577	-0.0445412	0.013738	0.00293582	-0.00103122
0.18	0.0109394	-0.00761776	-0.0448515	0.0140156	0.00389807	-0.00140718
0.181	0.0104345	-0.00886904	-0.0451381	0.014335	0.00482554	-0.00196048
0.182	0.00957648	-0.0103515	-0.0452795	0.0146595	0.00565281	-0.00255445
0.183	0.0084391	-0.0118603	-0.0450758	0.0149428	0.00634674	-0.00301958
0.184	0.00720315	-0.0131706	-0.0444904	0.0151483	0.00692854	-0.00332395
0.185	0.00606953	-0.0141626	-0.0435947	0.0152327	0.00732986	-0.00357964
0.186	0.00517977	-0.0149034	-0.0423895	0.0151761	0.0074297	-0.00392816
0.187	0.00452679	-0.0155819	-0.0408675	0.0150069	0.00716874	-0.00434297
0.188	0.00402359	-0.0163689	-0.039158	0.0147629	0.00652213	-0.00472495
0.189	0.00361904	-0.0173296	-0.0374651	0.0144541	0.00551037	-0.00514244
0.19	0.00334479	-0.0183019	-0.0359712	0.0140611	0.00428353	-0.00571336
0.191	0.00327293	-0.0190165	-0.0347995	0.0136199	0.00303057	-0.00639637
0.192	0.00338297	-0.0194148	-0.0339922	0.0133067	0.00182553	-0.00706837
0.193	0.00359634	-0.0195543	-0.0335078	0.0132976	0.000681288	-0.00761655
0.194	0.00392618	-0.019394	-0.0332147	0.0136528	-0.000332662	-0.0079627
0.195	0.00436354	-0.0188602	-0.0329608	0.0143581	-0.00116971	-0.00812135
0.196	0.00476455	-0.017969	-0.0326882	0.0152612	-0.00188702	-0.00816242
0.197	0.00500027	-0.0168863	-0.0324597	0.0161375	-0.00252191	-0.00817865
0.198	0.00506691	-0.0157847	-0.0324189	0.0169061	-0.00307217	-0.00825926
0.199	0.00504277	-0.0147471	-0.0326806	0.0175687	-0.00359064	-0.0084264
0.2	0.00493063	-0.0139475	-0.0331593	0.0180439	-0.00411986	-0.00865788
0.201	0.00461718	-0.013609	-0.0335219	0.018225	-0.00460229	-0.00890568
0.202	0.00408025	-0.013748	-0.0334285	0.0180871	-0.00495812	-0.00909939
0.203	0.00352045	-0.0142132	-0.0328246	0.0176742	-0.00521279	-0.00915266
0.204	0.00319718	-0.0148842	-0.0318674	0.0170748	-0.00542078	-0.00893015
0.205	0.00323886	-0.0156722	-0.0306809	0.0164341	-0.00555349	-0.0083099
0.206	0.00373749	-0.0164108	-0.0293895	0.0158867	-0.00557322	-0.00727285
0.207	0.00484979	-0.0168424	-0.0282806	0.0154711	-0.00552268	-0.00588908
0.208	0.0066134	-0.0166507	-0.0276708	0.0151886	-0.00552756	-0.00423778
0.209	0.00881259	-0.0156084	-0.027631	0.0150616	-0.00566191	-0.00237267
0.21	0.0111675	-0.0138032	-0.0280012	0.0150474	-0.00587072	-0.000442391
0.211	0.0134536	-0.0116188	-0.0285365	0.0150452	-0.00607661	0.00126905
0.212	0.0153785	-0.00949755	-0.029046	0.0149928	-0.00624512	0.0025339
0.213	0.0166246	-0.00776346	-0.0294494	0.014876	-0.00639595	0.00328399
0.214	0.0170484	-0.00660287	-0.0296313	0.014754	-0.00656062	0.00350553
0.215	0.0167265	-0.00605341	-0.0294083	0.0146913	-0.00668378	0.00322404
0.216	0.0158776	-0.00599901	-0.0286724	0.0146458	-0.0066464	0.00257544
0.217	0.0147088	-0.00632723	-0.0275225	0.0145234	-0.00636334	0.00175565
0.218	0.0133084	-0.0070298	-0.0262451	0.0142467	-0.00581422	0.000962686
0.219	0.0117351	-0.00810943	-0.0250874	0.0137796	-0.00504049	0.00038682
0.22	0.0101097	-0.00942154	-0.0241325	0.0132096	-0.00407179	0.000128156
0.221	0.00860013	-0.0106133	-0.0234122	0.0127617	-0.00286188	0.000114583
0.222	0.00738897	-0.0113748	-0.02298	0.0126712	-0.00140979	0.000153168
0.223	0.00665725	-0.0116702	-0.0228357	0.0130323	0.000170676	7.4254e-05
0.224	0.00652009	-0.0116321	-0.0228809	0.0137518	0.00178348	-0.000154145
0.225	0.00688055	-0.0114438	-0.0230255	0.0146708	0.00339116	-0.000446067
0.226	0.00744915	-0.0112344	-0.0232419	0.0156679	0.00496304	-0.000677677
0.227	0.00803064	-0.0109514	-0.023412	0.0166408	0.00649917	-0.00077846
0.228	0.00860928	-0.0105166	-0.0233978	0.0174902	0.00802786	-0.000836961
0.229	0.0091489	-0.0100595	-0.0233392	0.0181527	0.00949651	-0.00103386
0.23	0.00957501	-0.00976945	-0.0235138	0.0186008	0.0107182	-0.00144946
0.231	0.00989031	-0.00964298	-0.024019	0.0188199	0.011558	-0.00195814
0.232	0.0101371	-0.00955563	-0.0247617	0.0188648	0.0120645	-0.00230996
0.233	0.0102712	-0.00941583	-0.0255325	0.0187983	0.0122858	-0.002348
0.234	0.0101816	-0.0091593	-0.0261206	0.0186003	0.0121367	-0.00200064
0.235	0.00981556	-0.00879568	-0.0264509	0.0182859	0.0115258	-0.00117901
0.236	0.00923134	-0.00843789	-0.0265841	0.0179085	0.0104252	5.53466e-05
0.237	0.00858418	-0.0082089	-0.0266242	0.0174102	0.00884167	0.00147467
0.238	0.00797647	-0.0081547	-0.0266935	0.0166884	0.00690631	0.00288886
0.239	0.00736805	-0.00818147	-0.0269216	0.0158019	0.0048994	0.00423112
0.24	0.00675548	-0.0082019	-0.0273323	0.0150055	0.003089	0.00558111
0.241	0.00621444	-0.00829545	-0.027919	0.0145594	0.00161476	0.00703009
0.242	0.00576964	-0.00846654	-0.0287368	0.0145172	0.000473381	0.00854645
0.243	0.00543527	-0.00846309	-0.0297058	0.0147467	-0.000425426	0.0100285
0.244	0.00525235	-0.00810076	-0.0306189	0.0151209	-0.00115634	0.0113371
0.245	0.00521177	-0.00754868	-0.0313484	0.0156365	-0.00169832	0.0123099
0.246	0.00524244	-0.007046	-0.0318454	0.016316	-0.00199769	0.012791
0.247	0.00531098	-0.00658095	-0.0321001	0.0170227	-0.0021735	0.0127082
0.248	0.00549263	-0.0060496	-0.032167	0.0175051	-0.0024198	0.012127
0.249	0.00592612	-0.00548808	-0.0320917	0.0176264	-0.00270282	0.0111628
0.25	0.0067631	-0.00506189	-0.0318454	0.0174481	-0.00284166	0.00996202
0.251	0.00800677	-0.00495414	-0.0314601	0.0171214	-0.00274155	0.00871779
0.252	0.00939797	-0.00533997	-0.031058	0.0168133	-0.00248257	0.0075712
0.253	0.0107393	-0.00635155	-0.0306603	0.0166101	-0.00227137	0.00655907
0.254	0.0121301	-0.00791447	-0.0302168	0.0164077	-0.00226436	0.00565095
0.255	0.0137434	-0.00970876	-0.0297762	0.0160781	-0.00252477	0.0048266
0.256	0.0156257	-0.0113732	-0.0294519	0.0156774	-0.0030774	0.00413475
0.257	0.0176667	-0.0127537	-0.0292961	0.0153615	-0.00390171	0.00363645
0.258	0.019676	-0.0138851	-0.0292103	0.0152424	-0.00495317	0.00334593
0.259	0.0214511	-0.0148008	-0.028987	0.015382	-0.00614573	0.00320521
0.26	0.0226789	-0.0155375	-0.0284657	0.0157785	-0.00734999	0.00308158
0.261	0.0230055	-0.0161919	-0.0276464	0.0163541	-0.00847131	0.00289759
0.262	0.0223528	-0.0168298	-0.0267397	0.0170004	-0.00941497	0.00268353
0.263	0.0209298	-0.0174257	-0.0260197	0.0176276	-0.0100366	0.00244607
0.264	0.0189144	-0.017943	-0.0255499	0.0182095	-0.0102701	0.00212725
0.265	0.0163543	-0.018361	-0.0251935	0.0187429	-0.0101675	0.00166662
0.266	0.013245	-0.0186243	-0.0247675	0.0191246	-0.00976388	0.00101378
0.267	0.00963462	-0.018659	-0.0240533	0.0192187	-0.00910917	0.000190366
0.268	0.00579198	-0.0184191	-0.0229605	0.0190856	-0.00833442	-0.000654035
0.269	0.00219112	-0.0179446	-0.0216762	0.0188983	-0.00755087	-0.00134358
0.27	-0.000698716	-0.0173475	-0.0204331	0.0186939	-0.00683338	-0.00177853
0.271	-0.00269362	-0.0166883	-0.0193042	0.0183848	-0.00621843	-0.00193741
0.272	-0.00395104	-0.0158972	-0.0183025	0.017905	-0.00562618	-0.0018165
0.273	-0.00463976	-0.0148699	-0.0175406	0.0172942	-0.00492882	-0.00142479
0.274	-0.00484383	-0.0136877	-0.0171559	0.016609	-0.00405545	-0.000871718
0.275	-0.00474979	-0.0126121	-0.017117	0.0158427	-0.00298279	-0.000316561
0.276	-0.00456941	-0.0118148	-0.0173688	0.0150647	-0.00170219	0.00019079
0.277	-0.00436841	-0.0112834	-0.0180547	0.0144349	-0.000251989	0.000688618
0.278	-0.00411907	-0.0108916	-0.0193024	0.0140145	0.00121707	0.00113534
0.279	-0.00377831	-0.0104186	-0.0209936	0.0137698	0.00256235	0.00140938
0.28	-0.00323266	-0.00968753	-0.0229186	0.0136684	0.0038042	0.00149987
0.281	-0.00230326	-0.00872622	-0.0249414	0.0136649	0.0050383	0.00150493
0.282	-0.000942372	-0.00761015	-0.0269035	0.0137482	0.0062769	0.00144752
0.283	0.000649077	-0.00633024	-0.0285394	0.0139611	0.0074972	0.0012684
0.284	0.00227405	-0.00496295	-0.0296326	0.014286	0.00873878	0.000908603
0.285	0.00394428	-0.00369214	-0.0301786	0.0146793	0.00997996	0.00032515
0.286	0.00574302	-0.00263946	-0.0303504	0.0150999	0.0110586	-0.000453772
0.287	0.00779215	-0.00186097	-0.0302902	0.0153757	0.0117747	-0.00125061
0.288	0.0103153	-0.00144881	-0.0299182	0.0154098	0.0120318	-0.00180969
0.289	0.0133901	-0.00152294	-0.0291058	0.0153708	0.0118678	-0.00202884
0.29	0.0168239	-0.00206886	-0.0279479	0.0153701	0.0113413	-0.00203842
0.291	0.0206075	-0.00291766	-0.0267232	0.0153069	0.0105371	-0.00206136
0.292	0.0252473	-0.00399652	-0.0256287	0.0151189	0.00956374	-0.00226933
0.293	0.0317202	-0.00534726	-0.0245665	0.0149234	0.00849495	-0.00266113
0.294	0.0416294	-0.00692787	-0.0233645	0.0148992	0.00743704	-0.00309889
0.295	0.0573613	-0.00862251	-0.0219815	0.0151445	0.00643643	-0.00349289
0.296	0.0816613	-0.0103481	-0.0203598	0.015633	0.00539668	-0.00378848
0.297	0.116756	-0.0120496	-0.0184609	0.0162545	0.00425156	-0.00385222
0.298	0.163642	-0.0135985	-0.0164048	0.0169811	0.00298443	-0.00361335
0.299	0.221769	-0.0147895	-0.0143721	0.0178665	0.00155103	-0.00315808
0.3	0.28912	-0.0154563	-0.0124108	0.0189048	-9.1535e-06	-0.00250925
0.301	0.362807	-0.0154956	-0.0102867	0.0200849	-0.00148893	-0.00160568
0.302	0.440018	-0.0148399	-0.00722648	0.021458	-0.00263276	-0.000481177
0.303	0.518861	-0.0135587	-0.00164233	0.0230858	-0.00336403	0.000886403
0.304	0.599039	-0.0119432	0.00873131	0.0249215	-0.00387633	0.00278406
0.305	0.682408	-0.0103084	0.0263441	0.0268513	-0.00441215	0.00574379
0.306	0.772984	-0.00870734	0.0532606	0.0289455	-0.00498891	0.0104941
0.307	0.876228	-0.00698296	0.0905249	0.0315511	-0.00546039	0.0177984
0.308	0.9978	-0.00506402	0.137748	0.0352623	-0.00568927	0.0281845
0.309	1.14209	-0.00302024	0.193235	0.0408139	-0.00550436	0.0418343
0.31	1.31117	-0.000882782	0.254429	0.0488624	-0.00473432	0.0585092
0.311	1.50443	0.00144682	0.318576	0.0598542	-0.00328873	0.0774282
0.312	1.71849	0.0042844	0.38365	0.0739033	-0.00107789	0.0974161
0.313	1.94742	0.00841328	0.449195	0.0907312	0.00209426	0.117284
0.314	2.18334	0.0153355	0.516694	0.109761	0.00667905	0.136144
0.315	2.41719	0.0271666	0.589291	0.13025	0.0133362	0.153562
0.316	2.63958	0.0462009	0.670993	0.151469	0.0226107	0.169746
0.317	2.84185	0.0743735	0.765848	0.172788	0.0346972	0.185773
0.318	3.01698	0.112601	0.877293	0.193801	0.0494389	0.203449
0.319	3.16006	0.160282	1.00732	0.214692	0.0663886	0.224913
0.32	3.26816	0.215396	1.15577	0.236466	0.0847322	0.252273
0.321	3.34006	0.275185	1.32046	0.260743	0.103423	0.287222
0.322	3.37609	0.337042	1.49753	0.289295	0.121587	0.330675
0.323	3.37778	0.39931	1.68172	0.323658	0.138727	0.382604
0.324	3.34708	0.461908	1.86667	0.36484	0.154911	0.442073
0.325	3.28559	0.526631	2.04545	0.41304	0.170992	0.507358
0.326	3.19411	0.596912	2.2112	0.467602	0.188506	0.576216
0.327	3.07145	0.677176	2.3581	0.527224	0.209425	0.646243
0.328	2.91298	0.771986	2.4821	0.590239	0.23578	0.715195
0.329	2.71075	0.884934	2.5812	0.65491	0.26914	0.781207
0.33	2.45598	1.01782	2.65537	0.71966	0.310293	0.84289
0.331	2.1429	1.17055	2.70589	0.783137	0.359167	0.899353
0.332	1.77228	1.34128	2.73452	0.844226	0.414885	0.9501
0.333	1.35336	1.5265	2.74282	0.902097	0.475972	0.994922
0.334	0.903161	1.72114	2.73175	0.9562	0.540631	1.03385
0.335	0.443859	1.91877	2.70083	1.00607	0.606964	1.06707
0.336	-0.00112664	2.11226	2.64687	1.05126	0.673097	1.09493
0.337	-0.411108	2.29453	2.5629	1.09141	0.737315	1.11774
0.338	-0.771024	2.45915	2.43907	1.12613	0.798199	1.13528
0.339	-1.07294	2.60113	2.26621	1.15486	0.854792	1.14601
0.34	-1.31636	2.71755	2.04019	1.17686	0.90668	1.14628
0.341	-1.50747	2.80764	1.7647	1.19097	0.953912	1.13038
0.342	-1.65723	2.87203	1.45102	1.19518	0.996822	1.09207
0.343	-1.77852	2.9119	1.11488	1.18606	1.03576	1.02681
0.344	-1.88313	2.92852	0.772346	1.15871	1.07082	0.933328
0.345	-1.97942	2.92287	0.436679	1.10793	1.10179	0.814232
0.346	-2.07122	2.89464	0.116918	1.03022	1.12798	0.67565
0.347	-2.15777	2.84104	-0.182292	0.925264	1.14751	0.525968
0.348	-2.23476	2.75601	-0.460309	0.796211	1.15654	0.374136
0.349	-2.2959	2.63076	-0.719586	0.649381	1.14935	0.22812
0.35	-2.33474	2.45626	-0.964356	0.493173	1.11968	0.0937425
0.351	-2.34601	2.22741	-1.19914	0.33649	1.06269	-0.0259119
0.352	-2.32629	1.94651	-1.42715	0.187382	0.976512	-0.130455
0.353	-2.27434	1.6239	-1.64885	0.0520195	0.863194	-0.221719
0.354	-2.19129	1.27536	-1.861	-0.0660711	0.728481	-0.302951
0.355	-2.08054	0.917889	-2.05708	-0.166265	0.580522	-0.377628
0.356	-1.94723	0.566031	-2.22851	-0.250515	0.428167	-0.448333
0.357	-1.7975	0.229978	-2.36637	-0.322483	0.279545	-0.51621
0.358	-1.638	-0.0848365	-2.46283	-0.386257	0.141008	-0.580863
0.359	-1.47538	-0.377285	-2.51216	-0.445209	0.0163779	-0.640577
0.36	-1.31557	-0.649525	-2.51171	-0.501374	-0.0933159	-0.692813
0.361	-1.16337	-0.905712	-2.46238	-0.555285	-0.189481	-0.734798
0.362	-1.02246	-1.15064	-2.36831	-0.60612	-0.275066	-0.76417
0.363	-0.895356	-1.38809	-2.23611	-0.652028	-0.353384	-0.779515
0.364	-0.783387	-1.61917	-2.07417	-0.690668	-0.42701	-0.78054
0.365	-0.686843	-1.84144	-1.89196	-0.719803	-0.497177	-0.767965
0.366	-0.605246	-2.04906	-1.69908	-0.737719	-0.563641	-0.74338
0.367	-0.53754	-2.23381	-1.50433	-0.743513	-0.624844	-0.709041
0.368	-0.482217	-2.38667	-1.31521	-0.737179	-0.678455	-0.667539
0.369	-0.437555	-2.49925	-1.13771	-0.719497	-0.721958	-0.621478
0.37	-0.401746	-2.56515	-0.976182	-0.691904	-0.753178	-0.573242
0.371	-0.372932	-2.58098	-0.833334	-0.65633	-0.770794	-0.52495
0.372	-0.349449	-2.54684	-0.710341	-0.61496	-0.774469	-0.478469
0.373	-0.329984	-2.46612	-0.60723	-0.570038	-0.764687	-0.435296
0.374	-0.31343	-2.34481	-0.523187	-0.523694	-0.742695	-0.396427
0.375	-0.298913	-2.19084	-0.456659	-0.477871	-0.710444	-0.362383
0.376	-0.285833	-2.01329	-0.405416	-0.434301	-0.670334	-0.333325
0.377	-0.273628	-1.82157	-0.366755	-0.394309	-0.624876	-0.309138
0.378	-0.261752	-1.62476	-0.337877	-0.358672	-0.576467	-0.289465
0.379	-0.249966	-1.43094	-0.316247	-0.327773	-0.527335	-0.27379
0.38	-0.238314	-1.2467	-0.29971	-0.301746	-0.479417	-0.261602
0.381	-0.226878	-1.07684	-0.286469	-0.280402	-0.434242	-0.252399
0.382	-0.215677	-0.924486	-0.275141	-0.263268	-0.392972	-0.245552
0.383	-0.204688	-0.791356	-0.26475	-0.249705	-0.356426	-0.240306
0.384	-0.193959	-0.677912	-0.25456	-0.238979	-0.325087	-0.235961
0.385	-0.183677	-0.583415	-0.244015	-0.23046	-0.299003	-0.231992
0.386	-0.17405	-0.506185	-0.232787	-0.223702	-0.277721	-0.228013
0.387	-0.165261	-0.444082	-0.220769	-0.218328	-0.260536	-0.223778
0.388	-0.157452	-0.394797	-0.208087	-0.214044	-0.246802	-0.219232
0.389	-0.150636	-0.356003	-0.195213	-0.210641	-0.235956	-0.214435
0.39	-0.144772	-0.325569	-0.182745	-0.2078	-0.227451	-0.209408
0.391	-0.139894	-0.301646	-0.171024	-0.205088	-0.220761	-0.204124
0.392	-0.135975	-0.282672	-0.160155	-0.202186	-0.215351	-0.198632
0.393	-0.132774	-0.267372	-0.150289	-0.198948	-0.210655	-0.19306
0.394	-0.129966	-0.254648	-0.141652	-0.195298	-0.20619	-0.187594
0.395	-0.127346	-0.243496	-0.134362	-0.19127	-0.201675	-0.182436
0.396	-0.124866	-0.233047	-0.128319	-0.186973	-0.196987	-0.177674
0.397	-0.122567	-0.222773	-0.123248	-0.182503	-0.192056	-0.173234
0.398	-0.120504	-0.212549	-0.118869	-0.178007	-0.186918	-0.168981
0.399	-0.118691	-0.202367	-0.114981	-0.173651	-0.18181	-0.164886
0.4	-0.117147	-0.192127	-0.111479	-0.16947	-0.177026	-0.161049
0.401	-0.115995	-0.181746	-0.108352	-0.16541	-0.172651	-0.157526
0.402	-0.115329	-0.171351	-0.105512	-0.161427	-0.16857	-0.15419
0.403	-0.11509	-0.161257	-0.102747	-0.157506	-0.164709	-0.15077
0.404	-0.115164	-0.151807	-0.0999514	-0.15367	-0.161093	-0.147107
0.405	-0.115412	-0.143218	-0.0972141	-0.14999	-0.157767	-0.143266
0.406	-0.115672	-0.135406	-0.09465	-0.146534	-0.154728	-0.13938
0.407	-0.115824	-0.127999	-0.0922821	-0.143317	-0.151868	-0.135598
0.408	-0.115845	-0.120696	-0.0900848	-0.140301	-0.149062	-0.132073
0.409	-0.115836	-0.113472	-0.0879764	-0.137463	-0.146237	-0.128855
0.41	-0.115959	-0.106399	-0.0858581	-0.134832	-0.14334	-0.125905
0.411	-0.116311	-0.0995563	-0.0837201	-0.132419	-0.14032	-0.123146
0.412	-0.11691	-0.0931421	-0.0815987	-0.130164	-0.137133	-0.12049
0.413	-0.11767	-0.0874144	-0.079512	-0.128009	-0.133754	-0.117905
0.414	-0.118461	-0.0825546	-0.0774616	-0.125946	-0.130267	-0.115405
0.415	-0.11918	-0.0785664	-0.0754246	-0.124029	-0.126852	-0.113011
0.416	-0.119649	-0.0753122	-0.0733825	-0.122357	-0.123672	-0.11071
0.417	-0.119709	-0.0726695	-0.0713847	-0.120958	-0.120777	-0.108431
0.418	-0.119412	-0.0705963	-0.0695567	-0.11971	-0.118116	-0.106154
0.419	-0.118869	-0.0691079	-0.0679628	-0.11847	-0.115677	-0.103932
0.42	-0.118026	-0.0682236	-0.0665318	-0.117196	-0.113528	-0.101799
0.421	-0.116786	-0.0679556	-0.0651594	-0.115832	-0.111649	-0.0998124
0.422	-0.115291	-0.068296	-0.0637662	-0.11424	-0.109861	-0.098035
0.423	-0.113819	-0.0690808	-0.0623449	-0.112297	-0.107982	-0.0964031
0.424	-0.112542	-0.06996	-0.0610059	-0.110004	-0.105964	-0.0947718
0.425	-0.111541	-0.070681	-0.0599093	-0.107528	-0.103844	-0.093013
0.426	-0.110883	-0.0712764	-0.0591808	-0.105069	-0.101703	-0.0910464
0.427	-0.110576	-0.0717816	-0.0589582	-0.102697	-0.0996451	-0.0888955
0.428	-0.11051	-0.0719941	-0.0594804	-0.100392	-0.0977069	-0.0866253
0.429	-0.110486	-0.0717191	-0.0609173	-0.0981879	-0.0958439	-0.0842802
0.43	-0.110366	-0.0710394	-0.0631103	-0.0961663	-0.0939919	-0.0819296
0.431	-0.110133	-0.0702243	-0.0656709	-0.0943115	-0.0921248	-0.0797139
0.432	-0.109784	-0.0694619	-0.068217	-0.0925434	-0.090252	-0.0777924
0.433	-0.109323	-0.0687112	-0.0705177	-0.0908856	-0.0883968	-0.0761776
0.434	-0.108815	-0.0678039	-0.0725555	-0.0894296	-0.0865791	-0.07475
0.435	-0.108352	-0.0665634	-0.0743388	-0.0881346	-0.0847873	-0.0734135
0.436	-0.108011	-0.0648586	-0.0757505	-0.0867474	-0.0830166	-0.0721394
0.437	-0.107772	-0.062744	-0.0767014	-0.0850373	-0.0812729	-0.0709593
0.438	-0.107459	-0.0604636	-0.077258	-0.0830536	-0.079541	-0.0698752
0.439	-0.106853	-0.0582336	-0.0775216	-0.0809681	-0.0777957	-0.06876
0.44	-0.105859	-0.0561474	-0.077469	-0.0789008	-0.0760513	-0.0674692
0.441	-0.104542	-0.0542801	-0.077028	-0.0770464	-0.0743704	-0.066031
0.442	-0.103067	-0.0526964	-0.0761897	-0.0756147	-0.0727799	-0.0646098
0.443	-0.101606	-0.0513407	-0.0749375	-0.0746642	-0.0712301	-0.0633679
0.444	-0.100286	-0.0501176	-0.0732291	-0.0741574	-0.0696512	-0.0624186
0.445	-0.0991641	-0.0490718	-0.0711247	-0.0739412	-0.0680576	-0.0617971
0.446	-0.0982302	-0.0483197	-0.0688361	-0.0737376	-0.0665478	-0.0614742
0.447	-0.0974079	-0.0478862	-0.066587	-0.0733316	-0.0651569	-0.0613128
0.448	-0.0966315	-0.0476966	-0.0644952	-0.0725975	-0.0638353	-0.061041
0.449	-0.0959551	-0.0476084	-0.062614	-0.0714668	-0.0625556	-0.0604838
0.45	-0.0954098	-0.0473979	-0.0609499	-0.0700567	-0.0613345	-0.0596915
0.451	-0.094841	-0.0468897	-0.0594381	-0.0686069	-0.0601793	-0.0587301
0.452	-0.094157	-0.0461643	-0.0579996	-0.0672286	-0.0590342	-0.0575948
0.453	-0.0934954	-0.0454953	-0.0565975	-0.0658813	-0.0578393	-0.0563142
0.454	-0.0929269	-0.0451025	-0.0552507	-0.0645448	-0.0565677	-0.0549162
0.455	-0.0922868	-0.0449936	-0.0540005	-0.0632083	-0.0551672	-0.053386
0.456	-0.0914011	-0.0450077	-0.052822	-0.0617642	-0.0536785	-0.0517212
0.457	-0.0902974	-0.0449094	-0.0516901	-0.0600738	-0.0522729	-0.0499404
0.458	-0.0891007	-0.0444172	-0.050796	-0.0581101	-0.0510779	-0.0480585
0.459	-0.087855	-0.0433648	-0.0504185	-0.0560074	-0.0501161	-0.0461226
0.46	-0.0866119	-0.0418928	-0.0505416	-0.0539305	-0.0493463	-0.044276
0.461	-0.0855158	-0.0403217	-0.0508613	-0.0519085	-0.0486794	-0.042696
0.462	-0.0846382	-0.0388644	-0.0510451	-0.0498928	-0.0479956	-0.0414409
0.463	-0.0839304	-0.0375937	-0.0508936	-0.0479258	-0.0472421	-0.0403865
0.464	-0.083397	-0.0365267	-0.0503195	-0.046139	-0.0464509	-0.039346
0.465	-0.0830625	-0.0355702	-0.0492214	-0.0446752	-0.0455626	-0.0382128
0.466	-0.0828064	-0.0345413	-0.0476264	-0.0436411	-0.0444391	-0.0369283
0.467	-0.0824493	-0.0333951	-0.0458081	-0.0430818	-0.0430573	-0.0354967
0.468	-0.0818732	-0.0323124	-0.0440287	-0.0430146	-0.0414827	-0.0340693
0.469	-0.0809954	-0.0314687	-0.0424378	-0.0433986	-0.0397833	-0.0328624
0.47	-0.079763	-0.0308746	-0.0411448	-0.0440945	-0.0380625	-0.0319932
0.471	-0.0781796	-0.0305048	-0.0401463	-0.0448812	-0.0364513	-0.0313768
0.472	-0.0763019	-0.0303722	-0.0393537	-0.0455036	-0.0350604	-0.0308706
0.473	-0.0742136	-0.030414	-0.0387547	-0.0458004	-0.03404	-0.0305065
0.474	-0.0720581	-0.0305098	-0.0383712	-0.0457746	-0.0335175	-0.0304125
0.475	-0.0700595	-0.0306855	-0.0381393	-0.0455529	-0.0333728	-0.0306374
0.476	-0.0684138	-0.0311136	-0.0380027	-0.0452751	-0.0333504	-0.031096
0.477	-0.0672604	-0.0318975	-0.0379843	-0.0449925	-0.0333131	-0.0316456
0.478	-0.0667221	-0.0330001	-0.0381475	-0.044651	-0.033239	-0.0321668
0.479	-0.0667425	-0.0342407	-0.0385935	-0.044164	-0.0331782	-0.0325138
0.48	-0.0670753	-0.0353284	-0.0393648	-0.0435641	-0.0332199	-0.0326469
0.481	-0.0675949	-0.0360186	-0.0403594	-0.043016	-0.0334153	-0.0326886
0.482	-0.0683231	-0.03623	-0.0414626	-0.0426611	-0.0337478	-0.0326749
0.483	-0.0691671	-0.0360491	-0.0426321	-0.0425236	-0.034105	-0.0325221
0.484	-0.0698727	-0.0356048	-0.0438094	-0.0425163	-0.034286	-0.0321709
0.485	-0.0701998	-0.034945	-0.044876	-0.0425313	-0.0341632	-0.0315988
0.486	-0.0700604	-0.0340695	-0.0456925	-0.0425446	-0.0338007	-0.0308
0.487	-0.0694664	-0.0329979	-0.0461331	-0.0425655	-0.0333328	-0.0298315
0.488	-0.0684956	-0.0317625	-0.0461492	-0.0425348	-0.0328558	-0.0288281
0.489	-0.0673621	-0.0303683	-0.0458012	-0.0423954	-0.0324369	-0.0279781
0.49	-0.0663133	-0.0288422	-0.0452117	-0.0422011	-0.0320843	-0.0274804
0.491	-0.0654344	-0.0273441	-0.0445919	-0.0420333	-0.0317941	-0.0275009
0.492	-0.064676	-0.0260785	-0.0442017	-0.0418986	-0.0316107	-0.0281534
0.493	-0.0640391	-0.0250563	-0.0441613	-0.0417695	-0.0315954	-0.029354
0.494	-0.0635815	-0.0240526	-0.0444441	-0.0416523	-0.031766	-0.0307828
0.495	-0.0632725	-0.0228763	-0.045056	-0.0416177	-0.0320255	-0.0321723
0.496	-0.0630497	-0.0216386	-0.0460486	-0.0417523	-0.0322117	-0.0334679
0.497	-0.0629989	-0.0206092	-0.0472681	-0.0421129	-0.0322627	-0.0346858
0.498	-0.0631771	-0.0198906	-0.0483594	-0.0426986	-0.0322952	-0.0358354
0.499	-0.0633653	-0.0193643	-0.0491147	-0.0433871	-0.0324767	-0.0369375
0.5	-0.0633491	-0.0188833	-0.0495434	-0.04401	-0.0328938	-0.0379803
0.501	-0.0631826	-0.0183894	-0.049692	-0.0444645	-0.0335737	-0.0389449
0.502	-0.0630147	-0.0178905	-0.0494867	-0.0447229	-0.0344795	-0.0397911
0.503	-0.0628734	-0.0174327	-0.0487892	-0.0448389	-0.0354958	-0.0404348
0.504	-0.0626034	-0.0170898	-0.0476897	-0.0449277	-0.0365007	-0.0409285
0.505	-0.0620865	-0.0169047	-0.0464858	-0.0450745	-0.0374517	-0.041379
0.506	-0.0614529	-0.0167428	-0.0453629	-0.045243	-0.0383558	-0.0417241
0.507	-0.060865	-0.0164079	-0.0444017	-0.0453002	-0.039191	-0.0418742
0.508	-0.0603244	-0.0158595	-0.0438301	-0.0451742	-0.0399578	-0.0418264
0.509	-0.0597606	-0.0151252	-0.0439369	-0.0449244	-0.0406477	-0.0416146
0.51	-0.0591558	-0.0142728	-0.0446897	-0.0445681	-0.041151	-0.0413057
0.511	-0.0586164	-0.0134589	-0.0457154	-0.0440484	-0.0414116	-0.0410186
0.512	-0.0582947	-0.012836	-0.0466627	-0.0434431	-0.0415004	-0.0409235
0.513	-0.0582095	-0.0124996	-0.0473962	-0.0429518	-0.0414464	-0.0411463
0.514	-0.0582557	-0.0124663	-0.0479256	-0.0427435	-0.0412156	-0.0416582
0.515	-0.0583957	-0.0126492	-0.0482788	-0.0429116	-0.0407969	-0.0423632
0.516	-0.0586453	-0.0128838	-0.048442	-0.0433846	-0.0402414	-0.043242
0.517	-0.0589184	-0.0130002	-0.0483445	-0.0439323	-0.0396559	-0.0442551
0.518	-0.0590306	-0.0129615	-0.0478165	-0.0444129	-0.0390998	-0.0452329
0.519	-0.0587661	-0.0128921	-0.0466568	-0.0448008	-0.0385954	-0.0460192
0.52	-0.0580338	-0.0129117	-0.0448817	-0.0450118	-0.0382108	-0.0466049
0.521	-0.0570426	-0.0130384	-0.0427308	-0.0449906	-0.0379567	-0.0470393
0.522	-0.0560796	-0.0131832	-0.0403954	-0.0448136	-0.0377901	-0.0473294
0.523	-0.0551389	-0.013219	-0.0379638	-0.0445462	-0.037765	-0.0474806
0.524	-0.054033	-0.0131181	-0.035523	-0.0441643	-0.0379325	-0.047522
0.525	-0.052747	-0.0129602	-0.0332434	-0.0436719	-0.0382048	-0.0474461
0.526	-0.0514454	-0.012884	-0.0314427	-0.0431639	-0.0384631	-0.0471851
0.527	-0.0502735	-0.0129948	-0.0303185	-0.0427158	-0.0386218	-0.0466603
0.528	-0.0493002	-0.0132541	-0.0296157	-0.0422519	-0.0385636	-0.0458293
0.529	-0.0485355	-0.0135161	-0.0288959	-0.0416304	-0.03822	-0.0447229
0.53	-0.0479672	-0.0136336	-0.0280222	-0.0408446	-0.0376303	-0.0434534
0.531	-0.0476344	-0.0134715	-0.0271142	-0.0399424	-0.0367886	-0.0421468
0.532	-0.0476079	-0.0128921	-0.0262429	-0.0389049	-0.0356861	-0.0408758
0.533	-0.0478623	-0.0119179	-0.0253689	-0.037801	-0.0344638	-0.039678
0.534	-0.0482224	-0.0107471	-0.0244253	-0.0367795	-0.0332743	-0.0385654
0.535	-0.0484504	-0.00949106	-0.0233822	-0.0358769	-0.0321962	-0.0374775
0.536	-0.0484176	-0.0081868	-0.0222868	-0.0350434	-0.0313109	-0.0363708
0.537	-0.0482022	-0.00698676	-0.0212708	-0.0342629	-0.0306783	-0.03535
0.538	-0.0479677	-0.0060412	-0.0204649	-0.0335891	-0.0302704	-0.0345568
0.539	-0.0477721	-0.00533647	-0.0198664	-0.0330668	-0.0299921	-0.0340357
0.54	-0.0475534	-0.00476057	-0.0194081	-0.0326044	-0.0298523	-0.0337527
0.541	-0.0471612	-0.00423512	-0.0191196	-0.0320303	-0.0299989	-0.033594
0.542	-0.0464113	-0.00376811	-0.0191041	-0.0312445	-0.0305091	-0.0333641
0.543	-0.0453341	-0.00334828	-0.01945	-0.030263	-0.0313153	-0.0329332
0.544	-0.0442143	-0.00285117	-0.0201478	-0.0291505	-0.0322934	-0.0323729
0.545	-0.0432756	-0.0021882	-0.0210216	-0.0279666	-0.0333093	-0.031844
0.546	-0.0425975	-0.00146441	-0.0218933	-0.0267837	-0.0341817	-0.0314325
0.547	-0.0422989	-0.000882535	-0.0227995	-0.0256825	-0.0346842	-0.0311264
0.548	-0.0424875	-0.0005374	-0.0237932	-0.0247536	-0.0346421	-0.0308715
0.549	-0.043095	-0.000304181	-0.024661	-0.0241099	-0.0339779	-0.0306047
0.55	-0.0439113	7.78271e-05	-0.0250941	-0.0238362	-0.0327494	-0.0302413
0.551	-0.0447111	0.000803346	-0.0249214	-0.0239227	-0.0312029	-0.0297427
0.552	-0.0453359	0.00193132	-0.0240564	-0.0242954	-0.0296514	-0.02917
0.553	-0.045644	0.00343855	-0.0225368	-0.0248897	-0.0282908	-0.02859
0.554	-0.0455589	0.00517125	-0.0206539	-0.0255724	-0.0271683	-0.0279973
0.555	-0.0452053	0.00682195	-0.0186995	-0.0260933	-0.0262033	-0.0273417
0.556	-0.044816	0.00808907	-0.0167436	-0.0262589	-0.0252396	-0.0265721
0.557	-0.0445286	0.00877909	-0.0149097	-0.0260289	-0.0241424	-0.0256836
0.558	-0.0442579	0.00882868	-0.0134925	-0.0254366	-0.0228686	-0.0247323
0.559	-0.0438519	0.00829302	-0.0127252	-0.0245403	-0.0215115	-0.0237526
0.56	-0.0433606	0.00722631	-0.0126917	-0.0234401	-0.0201855	-0.022749
0.561	-0.0429444	0.00572786	-0.0133495	-0.0222755	-0.0189041	-0.0217612
0.562	-0.0426991	0.00410222	-0.0145749	-0.0211749	-0.0176651	-0.0208128
0.563	-0.0427028	0.00272134	-0.0162749	-0.0202013	-0.0164829	-0.0198628
0.564	-0.0429596	0.00177844	-0.018337	-0.0193493	-0.0153185	-0.0189117
0.565	-0.0433062	0.00124687	-0.0205162	-0.0185975	-0.014135	-0.0180816
0.566	-0.0435319	0.000969629	-0.0225789	-0.0179787	-0.0129946	-0.0175031
0.567	-0.0434696	0.000846406	-0.0244279	-0.0175588	-0.0119731	-0.0172032
0.568	-0.0430297	0.000953611	-0.0259972	-0.0173296	-0.0110484	-0.0171471
0.569	-0.0422332	0.00144235	-0.0272014	-0.0172039	-0.0101507	-0.0173069
0.57	-0.0411578	0.00238564	-0.0279831	-0.0170872	-0.00927464	-0.0176349
0.571	-0.0399405	0.00370596	-0.0283175	-0.0169455	-0.00853464	-0.0180239
0.572	-0.0387496	0.00519572	-0.0281699	-0.0168152	-0.00810106	-0.0183699
0.573	-0.0376913	0.00660216	-0.027546	-0.0166769	-0.00809239	-0.0186117
0.574	-0.0368399	0.0077694	-0.0265756	-0.0163876	-0.00846662	-0.0187289
0.575	-0.0362304	0.00873416	-0.0254448	-0.0158578	-0.00903401	-0.0187691
0.576	-0.0357966	0.00957627	-0.0242968	-0.0151622	-0.0096655	-0.0187928
0.577	-0.0355043	0.0101986	-0.0231299	-0.0144158	-0.0103356	-0.0188227
0.578	-0.0354522	0.0104022	-0.0218062	-0.0136893	-0.0109657	-0.0188882
0.579	-0.0356692	0.0101478	-0.0202861	-0.0129937	-0.0114715	-0.0189464
0.58	-0.0360075	0.00963337	-0.0186507	-0.0122436	-0.0119129	-0.0188528
0.581	-0.0363678	0.00909624	-0.0169559	-0.0113444	-0.0123904	-0.0186228
0.582	-0.0367931	0.00861909	-0.0153233	-0.0103383	-0.0128823	-0.0183847
0.583	-0.0372767	0.00824152	-0.0139132	-0.00936697	-0.0133307	-0.0180433
0.584	-0.0377182	0.00807593	-0.0127475	-0.00860457	-0.0137407	-0.0174444
0.585	-0.0380967	0.00823492	-0.0117984	-0.00817775	-0.0140998	-0.0166874
0.586	-0.0384046	0.00881958	-0.0110736	-0.00800775	-0.0143258	-0.0159785
0.587	-0.0385254	0.00985706	-0.0105305	-0.00791122	-0.0143176	-0.015334
0.588	-0.0384088	0.0112472	-0.0101236	-0.00781248	-0.0140533	-0.0146211
0.589	-0.038118	0.012868	-0.00984898	-0.00771446	-0.0136614	-0.0137877
0.59	-0.0377427	0.014608	-0.00967863	-0.00764306	-0.013329	-0.0128561
0.591	-0.0373692	0.0162924	-0.00963909	-0.00769873	-0.0131331	-0.0118289
0.592	-0.0370075	0.0176565	-0.00982749	-0.00799034	-0.0129975	-0.0107627
0.593	-0.0366402	0.0184932	-0.0102715	-0.00847449	-0.012799	-0.00980604
0.594	-0.0363264	0.0188291	-0.0109521	-0.00898753	-0.0124226	-0.00904914
0.595	-0.036127	0.0187529	-0.0118411	-0.00938597	-0.0117694	-0.00843833
0.596	-0.0360122	0.0182212	-0.0128047	-0.009548	-0.0108616	-0.00793582
0.597	-0.0359756	0.0172405	-0.0136174	-0.00939629	-0.00979573	-0.00764409
0.598	-0.0361114	0.0159048	-0.0141828	-0.00899828	-0.00863243	-0.00762924
0.599	-0.0364357	0.0143061	-0.0146361	-0.00853196	-0.00743289	-0.00776394
0.6	-0.0368616	0.0127062	-0.015172	-0.0081379	-0.00621437	-0.00787962
0.601	-0.0373339	0.0114403	-0.015922	-0.00783122	-0.00494306	-0.00793815
0.602	-0.0377396	0.0105382	-0.0168991	-0.00757469	-0.00363752	-0.00799207
0.603	-0.0378522	0.00976987	-0.0178868	-0.00739567	-0.00236839	-0.00809823
0.604	-0.0375323	0.00899783	-0.0184873	-0.00737259	-0.00119406	-0.00827367
0.605	-0.0368863	0.00831139	-0.0184423	-0.00750822	-0.00013789	-0.00846608
0.606	-0.036107	0.00788058	-0.0178979	-0.00761335	0.000764342	-0.00861871
0.607	-0.0352261	0.00774554	-0.0172557	-0.00741176	0.00147498	-0.00867734
0.608	-0.0341728	0.00777645	-0.016868	-0.0067582	0.00202765	-0.00853583
0.609	-0.0329531	0.00779253	-0.016875	-0.00574005	0.00248933	-0.00812733
0.61	-0.0316767	0.00768815	-0.0171613	-0.00469073	0.00288245	-0.00752453
0.611	-0.0305201	0.00748482	-0.0174696	-0.00390477	0.0032043	-0.00688748
0.612	-0.0296434	0.0072379	-0.0176125	-0.00335915	0.00347774	-0.00632811
0.613	-0.0291328	0.00692568	-0.0175719	-0.00295173	0.00377788	-0.00586417
0.614	-0.0290447	0.00650463	-0.0174304	-0.00275189	0.00421168	-0.00547347
0.615	-0.0294096	0.00602405	-0.017319	-0.00287291	0.00479318	-0.00518399
0.616	-0.0301889	0.00556624	-0.0173611	-0.00332159	0.00537833	-0.00508861
0.617	-0.0312217	0.00513084	-0.0175863	-0.00399531	0.00579149	-0.00519065
0.618	-0.0322277	0.00472106	-0.0179801	-0.00474183	0.00602298	-0.00532628
0.619	-0.0329826	0.00446279	-0.0185178	-0.00540869	0.0061606	-0.00534896
0.62	-0.0334943	0.00451566	-0.0190991	-0.00582146	0.00614608	-0.00531729
0.621	-0.0338984	0.00490297	-0.0195921	-0.00588984	0.00589171	-0.00536648
0.622	-0.0341618	0.00551291	-0.0199677	-0.0057214	0.00547768	-0.00551951
0.623	-0.034069	0.00627507	-0.0202731	-0.00549042	0.00504053	-0.00574893
0.624	-0.0335224	0.00722825	-0.0205133	-0.00528865	0.00459972	-0.00604665
0.625	-0.0326731	0.00836371	-0.0207389	-0.00512504	0.00409138	-0.00639965
0.626	-0.0317654	0.00956313	-0.0210876	-0.00501407	0.0035578	-0.00677798
0.627	-0.0309398	0.0107087	-0.0216158	-0.00499954	0.00314804	-0.00714245
0.628	-0.0302087	0.0116851	-0.0222723	-0.00508471	0.00290835	-0.00748038
0.629	-0.0295612	0.0123279	-0.0229461	-0.00516359	0.00267984	-0.00781031
0.63	-0.0290466	0.0125094	-0.0234158	-0.00507912	0.00224145	-0.00815769
0.631	-0.0287147	0.0122271	-0.0234735	-0.00476801	0.00155094	-0.00850349
0.632	-0.0285421	0.0115523	-0.0231548	-0.00430083	0.000783508	-0.00870796
0.633	-0.0284875	0.0105659	-0.0226772	-0.00384296	9.00861e-05	-0.00860396
0.634	-0.0284849	0.00933487	-0.0221446	-0.00354717	-0.000494618	-0.0081724
0.635	-0.0284775	0.00785691	-0.0214659	-0.0034502	-0.000901542	-0.00749051
0.636	-0.0284911	0.00605796	-0.020532	-0.0035212	-0.00106416	-0.00656402
0.637	-0.0285328	0.00390606	-0.0193558	-0.00374902	-0.00100947	-0.00532859
0.638	-0.028535	0.00147431	-0.0180852	-0.00412345	-0.000782396	-0.00383504
0.639	-0.0284007	-0.00107478	-0.0169224	-0.00454046	-0.000405802	-0.00230167
0.64	-0.028059	-0.00356504	-0.0159947	-0.00482591	9.40267e-05	-0.000889253
0.641	-0.0275932	-0.00595261	-0.0153302	-0.00485766	0.000678597	0.000377769
0.642	-0.0271894	-0.00832403	-0.0149939	-0.00458939	0.00128768	0.00144707
0.643	-0.0269293	-0.0107464	-0.0150836	-0.00404314	0.00180535	0.00222252
0.644	-0.0267728	-0.0131923	-0.0155993	-0.00332137	0.00208163	0.0027189
0.645	-0.0265996	-0.0155468	-0.0165195	-0.00256699	0.0020407	0.00306619
0.646	-0.026293	-0.0176547	-0.017805	-0.00187793	0.001745	0.00330866
0.647	-0.0259341	-0.0193734	-0.019271	-0.00132086	0.00134648	0.00340455
0.648	-0.0257511	-0.0206472	-0.0206425	-0.00100389	0.000997102	0.00340453
0.649	-0.0258721	-0.0215949	-0.0216658	-0.000985402	0.000830876	0.00339281
0.65	-0.0262658	-0.0223608	-0.0222474	-0.00119756	0.000931504	0.00339759
0.651	-0.0268736	-0.0228809	-0.0224796	-0.00153503	0.00123507	0.0034426
0.652	-0.0276617	-0.0230053	-0.0224237	-0.00193552	0.00155502	0.00351925
0.653	-0.0284849	-0.0227124	-0.0220787	-0.00241826	0.00173446	0.00359475
0.654	-0.0290833	-0.0219908	-0.0215426	-0.00305981	0.00172686	0.0036427
0.655	-0.0293237	-0.0204844	-0.0210277	-0.00388308	0.00151807	0.00359995
0.656	-0.0292595	-0.0174945	-0.0207445	-0.00480499	0.00105499	0.00343504
0.657	-0.02898	-0.0127011	-0.0207657	-0.00566544	0.000346994	0.00320691
0.658	-0.0285607	-0.00663484	-0.0210477	-0.00625312	-0.000451811	0.00301241
0.659	-0.0280483	-0.000233973	-0.0215738	-0.00643812	-0.00117328	0.00292891
0.66	-0.027433	0.00568338	-0.0222715	-0.00633423	-0.00173274	0.0029513
0.661	-0.0267414	0.0105766	-0.0229113	-0.00617627	-0.00206074	0.00299195
0.662	-0.0261358	0.014275	-0.0233201	-0.00608536	-0.00208858	0.00295279
0.663	-0.0258417	0.0168517	-0.0234974	-0.00604146	-0.00183425	0.0028118
0.664	-0.0259401	0.018304	-0.0234442	-0.00597324	-0.00141037	0.00269608
0.665	-0.0263229	0.0186489	-0.0231012	-0.00585127	-0.000876275	0.00276485
0.666	-0.0269151	0.0181878	-0.0224762	-0.00565891	-0.000150501	0.00298775
0.667	-0.0276568	0.017245	-0.0216482	-0.00533477	0.000815643	0.00320453
0.668	-0.028272	0.0158212	-0.0206541	-0.00485673	0.00190096	0.00334049
0.669	-0.028447	0.0137488	-0.0195551	-0.00425958	0.00296649	0.00338578
0.67	-0.0281587	0.0109967	-0.0185271	-0.00359914	0.00391998	0.0033168
0.671	-0.0276151	0.00771105	-0.0177108	-0.00292526	0.00468685	0.00320814
0.672	-0.026989	0.00413249	-0.0170795	-0.00226712	0.00530865	0.00324766
0.673	-0.0263091	0.000607539	-0.0165752	-0.00167186	0.00587909	0.00354766
0.674	-0.0255769	-0.00253849	-0.0162651	-0.0011551	0.00637894	0.00404828
0.675	-0.0248874	-0.00522138	-0.0161918	-0.000741342	0.00669993	0.00461626
0.676	-0.0244009	-0.00754426	-0.0161853	-0.000583308	0.00677155	0.00513629
0.677	-0.0242348	-0.00962312	-0.0160061	-0.000823765	0.00662517	0.00547496
0.678	-0.0244306	-0.0114748	-0.0156241	-0.00140923	0.00636935	0.00553728
0.679	-0.0250051	-0.0130148	-0.0152479	-0.00209611	0.00610466	0.00534912
0.68	-0.0259101	-0.0141823	-0.0150963	-0.00259594	0.00586244	0.00495498
0.681	-0.0269697	-0.014968	-0.0152439	-0.00276151	0.00566192	0.0043859
0.682	-0.0279784	-0.0153707	-0.0156241	-0.00262585	0.00556407	0.0037395
0.683	-0.0288472	-0.015469	-0.0160835	-0.00230196	0.00558975	0.00317434
0.684	-0.0295791	-0.0154247	-0.016501	-0.00192348	0.00569221	0.00279171
0.685	-0.0300924	-0.0153367	-0.0169409	-0.00164041	0.00586337	0.00256701
0.686	-0.0301802	-0.0152361	-0.0175644	-0.00154842	0.00611157	0.00242307
0.687	-0.0297618	-0.0152062	-0.0183038	-0.00166371	0.00634386	0.00231128
0.688	-0.0290091	-0.0152824	-0.0189278	-0.0020012	0.00640048	0.00227049
0.689	-0.0280904	-0.0152942	-0.0193844	-0.00251261	0.00617079	0.00234599
0.69	-0.0270286	-0.0149743	-0.0196951	-0.00305202	0.00565092	0.00246321
0.691	-0.0258574	-0.0141702	-0.0197433	-0.00354765	0.00492321	0.00257044
0.692	-0.0246846	-0.0129693	-0.0195161	-0.00400744	0.00406896	0.00276457
0.693	-0.0236209	-0.0116769	-0.0192447	-0.00436698	0.00314616	0.00312893
0.694	-0.0228349	-0.0106748	-0.0191344	-0.00451228	0.00227905	0.00362847
0.695	-0.0226001	-0.0102278	-0.0192459	-0.00439712	0.0016645	0.0042295
0.696	-0.0230854	-0.010213	-0.0196159	-0.00410483	0.00144282	0.00496771
0.697	-0.0241765	-0.010005	-0.0202204	-0.00378794	0.00159289	0.00582279
0.698	-0.0256132	-0.00875543	-0.020835	-0.00353828	0.0019243	0.00660805
0.699	-0.027144	-0.00582773	-0.021151	-0.00337926	0.00221135	0.00708245
0.7	-0.0285536	-0.00108876	-0.0210373	-0.00329637	0.00238863	0.0071634
0.701	-0.0297556	0.00501216	-0.0205435	-0.00325507	0.00255757	0.00699843
0.702	-0.0307962	0.0116008	-0.0197404	-0.00329512	0.00283211	0.00685437
0.703	-0.0317088	0.0178052	-0.0187223	-0.00352544	0.00326704	0.00691066
0.704	-0.0324703	0.0230729	-0.0176804	-0.0039435	0.00387827	0.00714953
0.705	-0.0330122	0.0270221	-0.0168068	-0.00439476	0.00464371	0.007476
0.706	-0.033193	0.0293398	-0.0161716	-0.00480055	0.0055094	0.00783492
0.707	-0.0328714	0.0299335	-0.0158131	-0.0051711	0.00644994	0.0081584
0.708	-0.0320398	0.028991	-0.0158262	-0.00538248	0.00750855	0.00835223
0.709	-0.030845	0.0268967	-0.0162553	-0.00524131	0.00868622	0.0084014
0.71	-0.0295193	0.0240734	-0.0170025	-0.00470657	0.00983304	0.00842336
0.711	-0.0283382	0.0208916	-0.0178523	-0.00389572	0.0107915	0.00856869
0.712	-0.0275224	0.0176667	-0.0186415	-0.00293836	0.0115657	0.0088532
0.713	-0.0271076	0.0147026	-0.0194322	-0.00196755	0.0122351	0.00913809
0.714	-0.026961	0.012283	-0.0203161	-0.00120763	0.0128257	0.00929857
0.715	-0.0268759	0.0105048	-0.0211727	-0.000863146	0.0133445	0.00929973
0.716	-0.0266586	0.00923027	-0.0218216	-0.000935862	0.013793	0.00907061
0.717	-0.0262288	0.00830345	-0.0222392	-0.00127279	0.0141525	0.00849166
0.718	-0.0256451	0.00766032	-0.0225045	-0.00171956	0.0144057	0.00760784
0.719	-0.0249804	0.0072287	-0.022574	-0.00212457	0.0144744	0.00667081
0.72	-0.0242777	0.00693694	-0.0223204	-0.00234432	0.0142367	0.00591353
0.721	-0.0236476	0.0067791	-0.0218434	-0.00237403	0.0136193	0.00540895
0.722	-0.0231724	0.00672289	-0.0213591	-0.00230622	0.0126044	0.00508494
0.723	-0.0227826	0.00667964	-0.0208249	-0.00219008	0.0113039	0.00484197
0.724	-0.0224092	0.00659404	-0.0200488	-0.00208684	0.0099862	0.00463287
0.725	-0.0221216	0.00648868	-0.0190237	-0.00208879	0.00888625	0.00441067
0.726	-0.0220811	0.00634374	-0.0179397	-0.00223082	0.0080697	0.00413885
0.727	-0.0223891	0.00590632	-0.0170048	-0.00247241	0.00754116	0.00382202
0.728	-0.0229494	0.00484404	-0.016361	-0.00271757	0.0073873	0.00349453
0.729	-0.0235975	0.00300399	-0.0161183	-0.00283155	0.00772543	0.00321691
0.73	-0.024278	0.000359998	-0.0163093	-0.0027023	0.00854381	0.0030063
0.731	-0.0250078	-0.00302079	-0.016829	-0.00235397	0.00969711	0.00282338
0.732	-0.0258128	-0.00686588	-0.0175139	-0.00196996	0.0110324	0.00267727
0.733	-0.0266485	-0.0107493	-0.0181129	-0.00174646	0.0123797	0.00255648
0.734	-0.0273866	-0.0143123	-0.0183612	-0.00175297	0.0135416	0.00238043
0.735	-0.0279658	-0.0173431	-0.0182811	-0.00193991	0.0144004	0.00217318
0.736	-0.0284612	-0.0196564	-0.0181226	-0.00220794	0.0149252	0.00204144
0.737	-0.0289422	-0.0210826	-0.0180145	-0.00254245	0.015151	0.00204965
0.738	-0.0293478	-0.0216472	-0.0178992	-0.00309248	0.0151278	0.0021798
0.739	-0.029639	-0.0215777	-0.0177129	-0.00394721	0.014813	0.00232902
0.74	-0.0299549	-0.0210232	-0.0174316	-0.00496768	0.0141528	0.00246976
0.741	-0.0304219	-0.0200267	-0.017003	-0.00592318	0.0132359	0.00264803
0.742	-0.0309873	-0.0187935	-0.0164327	-0.00657417	0.0122504	0.00280156
0.743	-0.0315561	-0.0176152	-0.0158741	-0.00677116	0.0113468	0.00286009
0.744	-0.0320456	-0.0166447	-0.0155236	-0.00659461	0.0105524	0.00283459
0.745	-0.0323411	-0.0159726	-0.0154732	-0.00621195	0.00980048	0.00268745
0.746	-0.0324007	-0.0156225	-0.0156735	-0.00575628	0.00901923	0.00235568
0.747	-0.0323582	-0.0154535	-0.0160116	-0.00538161	0.00817775	0.00189743
0.748	-0.0324434	-0.0153222	-0.0164087	-0.00516764	0.00733524	0.00145993
0.749	-0.0327966	-0.0151649	-0.0169089	-0.00507362	0.00664255	0.00107347
0.75	-0.0333517	-0.0149143	-0.0176024	-0.00511558	0.00621274	0.000667652
0.751	-0.0338566	-0.0145457	-0.0183329	-0.00540458	0.00606571	0.000283476
0.752	-0.034076	-0.0140813	-0.0187476	-0.00595971	0.00621428	4.49904e-07
0.753	-0.0339403	-0.0134497	-0.0186919	-0.00664639	0.00660721	-0.000231117
0.754	-0.0334304	-0.0125761	-0.0182812	-0.00732613	0.00710502	-0.000468768
0.755	-0.0325465	-0.0116361	-0.0177376	-0.00792519	0.00764476	-0.000633411
0.756	-0.0314077	-0.0108831	-0.017243	-0.00837916	0.00822644	-0.000674218
0.757	-0.0301344	-0.0103335	-0.016792	-0.00862958	0.00881249	-0.000661117
0.758	-0.0287166	-0.00985565	-0.0163013	-0.0086485	0.00937241	-0.000576119
0.759	-0.0272381	-0.0094327	-0.0158211	-0.00848876	0.00985467	-0.000351165
0.76	-0.0260667	-0.00918361	-0.0154983	-0.00829117	0.0101167	-8.8579e-05
0.761	-0.0255831	-0.00916878	-0.015475	-0.00815509	0.0100989	6.84975e-05
0.762	-0.0258752	-0.00931897	-0.0158276	-0.00807658	0.00997738	0.000154172
0.763	-0.0268119	-0.00955683	-0.0164898	-0.00801437	0.00999575	0.000301303
0.764	-0.0281633	-0.00991619	-0.0172661	-0.00793466	0.0102679	0.000543041
0.765	-0.0295758	-0.0104346	-0.0178969	-0.00780153	0.0107365	0.000745749
0.766	-0.0306835	-0.0109547	-0.0181054	-0.00757661	0.011245	0.000720733
0.767	-0.0313553	-0.0112032	-0.0177003	-0.00725339	0.0116634	0.000402561
0.768	-0.0317381	-0.0109066	-0.0166422	-0.00684914	0.0119582	-7.48444e-05
0.769	-0.0319882	-0.00961975	-0.0150526	-0.00640443	0.0121621	-0.000552313
0.77	-0.0321306	-0.00681843	-0.0131928	-0.00600091	0.0122593	-0.000996842
0.771	-0.0322267	-0.00240428	-0.0113704	-0.00571168	0.0121649	-0.00136285
0.772	-0.0323613	0.00314483	-0.00984147	-0.0055743	0.0118102	-0.00155434
0.773	-0.0324531	0.00903825	-0.00872335	-0.00556197	0.0112388	-0.00152825
0.774	-0.0323442	0.0145282	-0.00801587	-0.00556998	0.0106012	-0.00125466
0.775	-0.0320134	0.0192474	-0.00776857	-0.00550278	0.00997911	-0.000749991
0.776	-0.0315794	0.0231092	-0.00814352	-0.0053397	0.00941726	-0.000183969
0.777	-0.0311293	0.0259386	-0.00923775	-0.0051492	0.00908095	0.000254166
0.778	-0.0306666	0.0275129	-0.0109141	-0.00501274	0.00912415	0.000474499
0.779	-0.0302647	0.0278168	-0.0129048	-0.00496955	0.00946954	0.000468205
0.78	-0.0300377	0.0270284	-0.0149307	-0.00508801	0.00985371	0.000379432
0.781	-0.0299467	0.025434	-0.016655	-0.00546856	0.0100929	0.000390361
0.782	-0.0298624	0.0234053	-0.0177996	-0.0061279	0.0101327	0.000499311
0.783	-0.0297541	0.0212197	-0.0183603	-0.00693711	0.00992227	0.000604728
0.784	-0.0296592	0.0189417	-0.0184892	-0.00777756	0.00947314	0.000691226
0.785	-0.0295942	0.0165971	-0.0182007	-0.00863629	0.00891892	0.000836081
0.786	-0.0296541	0.0142664	-0.017377	-0.009484	0.00840942	0.00105811
0.787	-0.0299745	0.0119414	-0.0160282	-0.0102316	0.00796737	0.0012447
0.788	-0.0304152	0.00951585	-0.0143542	-0.0107871	0.00751371	0.00129946
0.789	-0.0306019	0.00695488	-0.0125696	-0.0110963	0.00704432	0.00120976
0.79	-0.0302991	0.00432871	-0.0108525	-0.0111231	0.00662169	0.000975666
0.791	-0.0295539	0.00174805	-0.00931341	-0.0108524	0.0063084	0.000603633
0.792	-0.0286272	-0.000722464	-0.00790848	-0.0103411	0.0062226	0.000116939
0.793	-0.0277407	-0.00314265	-0.00656606	-0.00968593	0.00644277	-0.00043791
0.794	-0.0270052	-0.00552452	-0.00532981	-0.00896919	0.00686832	-0.00105473
0.795	-0.02658	-0.00767673	-0.00430745	-0.00827807	0.00725682	-0.00179249
0.796	-0.026525	-0.00943054	-0.00360288	-0.00767524	0.0073977	-0.00264918
0.797	-0.0267239	-0.0108089	-0.00330025	-0.00714073	0.00729767	-0.00349919
0.798	-0.0270501	-0.01185	-0.00344148	-0.00665601	0.00710584	-0.00414984
0.799	-0.0273857	-0.0125106	-0.00398577	-0.00622314	0.00691469	-0.00448822
0.8	-0.0276293	-0.0127815	-0.00480016	-0.00582043	0.00680729	-0.00456974
0.801	-0.0277412	-0.0127632	-0.00568845	-0.00545266	0.0068966	-0.00444923
0.802	-0.0277708	-0.012567	-0.00642709	-0.00512622	0.00716611	-0.0040345
0.803	-0.0278618	-0.012107	-0.00685219	-0.00485757	0.00746207	-0.00325564
0.804	-0.0281172	-0.0112436	-0.0069717	-0.00473143	0.00765529	-0.00219426
0.805	-0.0284862	-0.0101319	-0.00693905	-0.00480985	0.00772704	-0.00101558
0.806	-0.0288626	-0.00906499	-0.00688669	-0.00504844	0.00765991	6.44555e-05
0.807	-0.0291763	-0.00815119	-0.00683356	-0.00540752	0.00732459	0.000867504
0.808	-0.0293767	-0.00736367	-0.00672093	-0.00593375	0.00668145	0.00136908
0.809	-0.0295062	-0.00668941	-0.00646174	-0.00669474	0.00590981	0.00172547
0.81	-0.0297087	-0.00616617	-0.00599111	-0.00771039	0.00518827	0.00221206
0.811	-0.0300645	-0.0058538	-0.00531762	-0.0088633	0.00455909	0.00302406
0.812	-0.0305173	-0.00572974	-0.0045368	-0.00995343	0.00395457	0.00407344
0.813	-0.0309177	-0.00569301	-0.00378744	-0.0108649	0.00332355	0.00506872
0.814	-0.0311837	-0.00575652	-0.00315651	-0.0115354	0.00277885	0.00586488
0.815	-0.0313985	-0.00609304	-0.00261881	-0.011908	0.00248487	0.00657774
0.816	-0.0316263	-0.00683484	-0.0021202	-0.0119803	0.00252056	0.00733009
0.817	-0.0317875	-0.0077737	-0.00170832	-0.0117787	0.0029196	0.00813866
0.818	-0.0317155	-0.00822989	-0.00149501	-0.0113441	0.00368966	0.00896755
0.819	-0.0312701	-0.00736088	-0.00149209	-0.0107877	0.00479281	0.00974986
0.82	-0.0304186	-0.00467715	-0.00158895	-0.0102978	0.00617163	0.0104824
0.821	-0.0291667	-0.000269399	-0.00171474	-0.0100691	0.00781503	0.0111718
0.822	-0.0276002	0.00533924	-0.00192093	-0.0102161	0.00973198	0.0117079
0.823	-0.0259839	0.0113643	-0.00229684	-0.010679	0.0118459	0.0120292
0.824	-0.0245287	0.0169786	-0.00291746	-0.0112363	0.0140036	0.0122281
0.825	-0.0231853	0.0216854	-0.00383072	-0.0116852	0.0160861	0.0123875
0.826	-0.0218143	0.0253815	-0.00496086	-0.0119185	0.0180362	0.0124758
0.827	-0.0204325	0.0280034	-0.00608662	-0.0118694	0.0197703	0.0123914
0.828	-0.0192483	0.0293834	-0.00693553	-0.0114826	0.0211073	0.0120538
0.829	-0.0185066	0.0294865	-0.00731378	-0.0107979	0.0218405	0.0114657
0.83	-0.0183097	0.0285156	-0.00723571	-0.0101215	0.0219462	0.010724
0.831	-0.018566	0.026731	-0.00689409	-0.00977843	0.0215755	0.0099662
0.832	-0.0190966	0.02433	-0.00649772	-0.00973122	0.0207966	0.00927041
0.833	-0.019783	0.0215417	-0.00613733	-0.00983252	0.0196485	0.00863425
0.834	-0.020555	0.0187265	-0.00576872	-0.0101181	0.0183172	0.00812595
0.835	-0.0212864	0.0162671	-0.00533001	-0.0106569	0.0169977	0.00793144
0.836	-0.0218839	0.014376	-0.00483744	-0.0113909	0.015749	0.00810446
0.837	-0.0224536	0.0130191	-0.00431835	-0.0121056	0.0145221	0.00847976
0.838	-0.0231678	0.0119347	-0.00378441	-0.0125583	0.0132538	0.00888913
0.839	-0.0239937	0.0108465	-0.00329683	-0.0126487	0.0119491	0.00925485
0.84	-0.0247023	0.00967729	-0.00289694	-0.0123736	0.0106901	0.00954034
0.841	-0.0251417	0.00837625	-0.00258202	-0.0117685	0.00955456	0.00976357
0.842	-0.0253826	0.00675003	-0.00245724	-0.0109701	0.00854564	0.00997423
0.843	-0.0255097	0.00468869	-0.00271827	-0.0101877	0.00767128	0.0101882
0.844	-0.0255361	0.00231034	-0.00338901	-0.00962639	0.00709661	0.0104122
0.845	-0.0255373	-0.000253843	-0.0042748	-0.0094449	0.00707074	0.0106396
0.846	-0.025575	-0.00292341	-0.00523361	-0.00963269	0.00762697	0.0108536
0.847	-0.0256765	-0.00552407	-0.0062021	-0.00994913	0.00855136	0.0110904
0.848	-0.025919	-0.00786408	-0.00700466	-0.0101381	0.00969227	0.0113752
0.849	-0.0263672	-0.00985183	-0.00745931	-0.0101315	0.0110352	0.0116642
0.85	-0.0269802	-0.0114252	-0.00754988	-0.00999723	0.0124919	0.0119489
0.851	-0.0276041	-0.0125152	-0.00739229	-0.00985809	0.0139257	0.0122851
0.852	-0.0280411	-0.0131396	-0.00716283	-0.0098609	0.0153039	0.012677
0.853	-0.0281496	-0.0133342	-0.00702203	-0.0101052	0.0166068	0.0131025
0.854	-0.0279364	-0.0130236	-0.00700968	-0.0106241	0.0176931	0.0136206
0.855	-0.0274942	-0.012221	-0.00704132	-0.01139	0.018377	0.0143636
0.856	-0.0268875	-0.0111474	-0.00702102	-0.0122596	0.0186094	0.015432
0.857	-0.0262166	-0.0100743	-0.00687939	-0.0130596	0.0184748	0.0167441
0.858	-0.0256362	-0.00922988	-0.00656222	-0.0137332	0.0180708	0.0180935
0.859	-0.0252266	-0.00873178	-0.00606428	-0.0143067	0.0174656	0.0192639
0.86	-0.0248839	-0.0085742	-0.00545565	-0.0147871	0.0166959	0.0200006
0.861	-0.0244151	-0.00870813	-0.00479154	-0.0150797	0.0158175	0.0201578
0.862	-0.0238082	-0.00911308	-0.0040467	-0.015042	0.0148841	0.0198653
0.863	-0.0232705	-0.00975808	-0.00330966	-0.0146657	0.0138796	0.0193776
0.864	-0.023026	-0.0104759	-0.00283558	-0.0141041	0.0128171	0.0188457
0.865	-0.0232156	-0.0110553	-0.00275421	-0.0135395	0.0117988	0.0182797
0.866	-0.0238623	-0.0114073	-0.00291741	-0.0131047	0.0109226	0.0176028
0.867	-0.0248354	-0.0115331	-0.00309514	-0.0128	0.0102601	0.0167421
0.868	-0.0258768	-0.0113906	-0.00317738	-0.0124896	0.00987315	0.0157848
0.869	-0.0267163	-0.0107127	-0.00316086	-0.0121351	0.00973668	0.0149787
0.87	-0.0272473	-0.00893194	-0.00309448	-0.0118706	0.00972933	0.0144945
0.871	-0.0274831	-0.00540459	-0.00296079	-0.0117612	0.00976189	0.0142837
0.872	-0.0274021	0.000252725	-0.00260395	-0.0117275	0.0098066	0.0142592
0.873	-0.0270856	0.00800297	-0.00190553	-0.0117102	0.00978696	0.014398
0.874	-0.0267931	0.0173055	-0.00092383	-0.0116944	0.00957168	0.0145777
0.875	-0.0267031	0.0270786	9.77954e-05	-0.0116431	0.00905583	0.0146201
0.876	-0.0267636	0.0360136	0.000816193	-0.0115643	0.00819543	0.0144369
0.877	-0.0268662	0.0430763	0.00102869	-0.0115198	0.00704085	0.0139641
0.878	-0.0269523	0.0476979	0.000779323	-0.0115093	0.00572594	0.0131805
0.879	-0.0269654	0.0497276	0.000229719	-0.0114395	0.00444047	0.0122165
0.88	-0.0269513	0.0493321	-0.000473531	-0.011219	0.00339248	0.0113428
0.881	-0.0270676	0.0468622	-0.00124495	-0.0108871	0.00268495	0.0107894
0.882	-0.027378	0.0428011	-0.00201198	-0.0105982	0.00230626	0.0105484
0.883	-0.0277978	0.0377437	-0.00267452	-0.0104762	0.0022479	0.0104981
0.884	-0.0281618	0.0323765	-0.00310788	-0.010567	0.00250785	0.0105895
0.885	-0.0283588	0.027375	-0.00318533	-0.0109089	0.00301393	0.0108273
0.886	-0.0284807	0.0231614	-0.00284132	-0.0115689	0.00367913	0.0112439
0.887	-0.0286536	0.0198079	-0.0020799	-0.0125171	0.00449782	0.0118192
0.888	-0.0288047	0.0172299	-0.000903316	-0.0134848	0.00547165	0.0123897
0.889	-0.0287358	0.0153524	0.000663081	-0.0141194	0.00658015	0.0127376
0.89	-0.0283137	0.0140622	0.00245786	-0.0143114	0.00778335	0.0127245
0.891	-0.0275507	0.0131468	0.0042415	-0.0142277	0.00895654	0.0124035
0.892	-0.0265356	0.0123934	0.0057618	-0.014044	0.0100361	0.0119662
0.893	-0.0253212	0.011799	0.00669649	-0.0138385	0.0110975	0.0115254
0.894	-0.0239761	0.0115316	0.00683538	-0.0136788	0.0121773	0.011082
0.895	-0.0226668	0.011661	0.00624454	-0.0136282	0.0132121	0.0106024
0.896	-0.0215183	0.0121201	0.00503425	-0.0136437	0.0140984	0.0100408
0.897	-0.0206023	0.0128031	0.00326767	-0.0135754	0.0147327	0.00937822
0.898	-0.0200464	0.0135857	0.00112021	-0.0133782	0.0150791	0.0086631
0.899	-0.0198792	0.0143887	-0.00112876	-0.0131538	0.0151642	0.00794861
0.9	-0.0199899	0.0152074	-0.00321307	-0.0129796	0.0149577	0.00722042
0.901	-0.0202978	0.0160296	-0.00497973	-0.0129165	0.0144213	0.0065155
0.902	-0.0206933	0.0167662	-0.00638614	-0.0130053	0.0136799	0.00600333
0.903	-0.0209676	0.0173239	-0.00739232	-0.0131752	0.0129705	0.00581904
0.904	-0.0209903	0.0177232	-0.00793381	-0.0132703	0.012494	0.00592448
0.905	-0.0208175	0.0179834	-0.00802268	-0.013171	0.0123962	0.00621722
0.906	-0.020635	0.0179208	-0.00777969	-0.0129014	0.0126835	0.0066735
0.907	-0.0205915	0.0171723	-0.00732685	-0.0125959	0.0131937	0.0072739
0.908	-0.020623	0.0154443	-0.00677525	-0.0123636	0.0137398	0.00796365
0.909	-0.0206032	0.0127008	-0.00622116	-0.0122435	0.0142045	0.00877052
0.91	-0.0206015	0.00901616	-0.00558871	-0.0122586	0.014666	0.00975968
0.911	-0.0207338	0.00447606	-0.00472242	-0.0124174	0.0153367	0.010922
0.912	-0.0208818	-0.000668105	-0.0036909	-0.0126866	0.016304	0.012206
0.913	-0.0208218	-0.00602649	-0.00269126	-0.0129868	0.0175302	0.0135493
0.914	-0.020542	-0.0111906	-0.00179929	-0.0132055	0.0189316	0.0148536
0.915	-0.0201902	-0.0157977	-0.00106885	-0.013322	0.0203931	0.0159531
0.916	-0.0198518	-0.019627	-0.000623458	-0.0134396	0.0218222	0.0166951
0.917	-0.0196117	-0.0225472	-0.000500732	-0.013618	0.0231301	0.0170295
0.918	-0.0195257	-0.024444	-0.000595124	-0.013895	0.0241633	0.016925
0.919	-0.0194017	-0.0252911	-0.000774711	-0.0143669	0.0247347	0.0163417
0.92	-0.0189792	-0.0252298	-0.000935191	-0.0150663	0.0247203	0.0153143
0.921	-0.0182585	-0.0245182	-0.00103839	-0.0158788	0.0240667	0.0139744
0.922	-0.0173961	-0.0233941	-0.00114684	-0.0165616	0.0228396	0.0125132
0.923	-0.0164075	-0.0220692	-0.0013017	-0.0168912	0.0212903	0.0111419
0.924	-0.0151708	-0.0207364	-0.00139684	-0.0168257	0.0196358	0.0100625
0.925	-0.0137168	-0.0194378	-0.00127459	-0.016438	0.0179367	0.00940519
0.926	-0.0123498	-0.0181733	-0.000968094	-0.0157716	0.0163041	0.00913111
0.927	-0.0114402	-0.0170968	-0.000670935	-0.0148026	0.0148851	0.00906721
0.928	-0.0112108	-0.0163194	-0.000392053	-0.013556	0.0137029	0.00907239
0.929	-0.0116607	-0.0158078	4.07089e-05	-0.0122073	0.012721	0.00906217
0.93	-0.0125619	-0.0155645	0.000632793	-0.010965	0.0119196	0.00897173
0.931	-0.0136115	-0.0155825	0.00124851	-0.0100211	0.0112786	0.00882752
0.932	-0.014641	-0.015697	0.00186835	-0.00958856	0.0107768	0.00873911
0.933	-0.0156172	-0.01569	0.00258517	-0.00972918	0.0104181	0.00879993
0.934	-0.0164552	-0.0154844	0.00348881	-0.0102661	0.010223	0.00906404
0.935	-0.0170168	-0.0151519	0.0045625	-0.0109545	0.0101518	0.00954142
0.936	-0.0172932	-0.0148181	0.00560549	-0.0116202	0.0101238	0.0101533
0.937	-0.0174005	-0.0145505	0.00644663	-0.0121915	0.0100949	0.0107626
0.938	-0.017417	-0.0142567	0.00712439	-0.0126445	0.0100236	0.0112901
0.939	-0.017315	-0.0137354	0.0076434	-0.012946	0.00988802	0.0117662
0.94	-0.0170354	-0.012926	0.00793058	-0.0131251	0.00975478	0.0122288
0.941	-0.0165845	-0.0120828	0.00796054	-0.013276	0.00971005	0.012656
0.942	-0.016084	-0.0115349	0.00760238	-0.0134528	0.00977033	0.0130237
0.943	-0.0157243	-0.0113492	0.00675476	-0.0136362	0.00990302	0.0132888
0.944	-0.0156734	-0.0114061	0.0056414	-0.0137369	0.0100853	0.0133735
0.945	-0.016043	-0.0116151	0.00457956	-0.0136496	0.0103237	0.0132475
0.946	-0.0168016	-0.0118474	0.00371512	-0.0133237	0.010638	0.0129742
0.947	-0.0176887	-0.0118378	0.00310066	-0.0127644	0.0110694	0.0126429
0.948	-0.0183802	-0.0111566	0.00274842	-0.0120561	0.0116251	0.0122798
0.949	-0.0187842	-0.00915357	0.00263771	-0.0114017	0.0122643	0.0118709
0.95	-0.0190509	-0.00530126	0.00279032	-0.0110207	0.0130022	0.0114022
0.951	-0.0192984	0.000309185	0.0033154	-0.0109428	0.0138643	0.0108594
0.952	-0.019498	0.00709236	0.0042345	-0.0109895	0.0147908	0.0103053
0.953	-0.0195805	0.0143328	0.00534068	-0.0109816	0.0156861	0.0098988
0.954	-0.0195011	0.0212985	0.00641388	-0.0108535	0.0165201	0.00974317
0.955	-0.01923	0.0273574	0.0073535	-0.0105673	0.0173355	0.00987437
0.956	-0.0187576	0.0321105	0.00804315	-0.0100974	0.0181759	0.010388
0.957	-0.0181428	0.0355186	0.00831309	-0.00951025	0.0190671	0.0113046
0.958	-0.0175573	0.038021	0.00805315	-0.00889654	0.019992	0.012423
0.959	-0.0172721	0.0402887	0.00730803	-0.00829269	0.0208229	0.0134907
0.96	-0.0175192	0.0427129	0.00622478	-0.00773079	0.0213785	0.0143481
0.961	-0.0183484	0.0452364	0.00489329	-0.00724636	0.0215788	0.0149777
0.962	-0.0196073	0.0475757	0.00334077	-0.00687386	0.0215171	0.015464
0.963	-0.0209946	0.0494289	0.00165858	-0.00669532	0.0214311	0.0158598
0.964	-0.0222195	0.0505581	-1.12632e-05	-0.00676561	0.0215668	0.0162001
0.965	-0.023139	0.0508086	-0.00159307	-0.00698645	0.0219523	0.0164771
0.966	-0.0237413	0.0500924	-0.0030993	-0.00715831	0.0224229	0.0166372
0.967	-0.0240268	0.0484137	-0.00454138	-0.00715915	0.022843	0.0167156
0.968	-0.0239838	0.0459175	-0.00584522	-0.00705416	0.023119	0.0168287
0.969	-0.0237176	0.0428786	-0.00688227	-0.00694642	0.0232068	0.0171015
0.97	-0.0234168	0.039572	-0.0076108	-0.00683457	0.0231615	0.0175319
0.971	-0.0231451	0.0362274	-0.00813302	-0.0067727	0.0230389	0.0178956
0.972	-0.0227876	0.0330679	-0.0085633	-0.00690986	0.0228302	0.0179852
0.973	-0.0222253	0.0301646	-0.00889846	-0.00727685	0.022503	0.0177843
0.974	-0.0214948	0.0275218	-0.00906801	-0.00772138	0.0220708	0.0173317
0.975	-0.0207584	0.0254521	-0.00910453	-0.00808255	0.021591	0.0166702
0.976	-0.0202276	0.0244396	-0.00914951	-0.00835886	0.0211041	0.0158773
0.977	-0.0200657	0.024634	-0.0093056	-0.00864315	0.0206034	0.0150488
0.978	-0.0202252	0.0257447	-0.00964941	-0.00896608	0.0200213	0.0142816
0.979	-0.0204676	0.027261	-0.0102328	-0.00927957	0.0193093	0.0135891
0.98	-0.0206529	0.0286405	-0.0109414	-0.00955944	0.0185052	0.0128882
0.981	-0.0209095	0.0294702	-0.0115372	-0.00984992	0.0176601	0.012082
0.982	-0.0213711	0.0295816	-0.0118322	-0.0101701	0.0168227	0.0111407
0.983	-0.0219232	0.0290309	-0.0117304	-0.0104633	0.0160594	0.0102141
0.984	-0.0224278	0.028035	-0.0111849	-0.0106371	0.0153985	0.00956005
0.985	-0.0228988	0.02687	-0.0101584	-0.010636	0.0148159	0.00929799
0.986	-0.0233481	0.0257177	-0.00866797	-0.0104984	0.0142871	0.0093671
0.987	-0.0237598	0.0246335	-0.00688614	-0.0102957	0.0138482	0.00962972
0.988	-0.0241616	0.0236849	-0.00508877	-0.0100906	0.0136088	0.00991027
0.989	-0.024564	0.0229707	-0.0034553	-0.00992148	0.0136319	0.0101101
0.99	-0.0248597	0.0224249	-0.00199362	-0.00978567	0.0137746	0.010327
0.991	-0.0249031	0.0218807	-0.000674342	-0.00968781	0.0137976	0.0107164
0.992	-0.0247386	0.021269	0.000469851	-0.00963121	0.0136443	0.0112216
0.993	-0.0245727	0.0205911	0.00139649	-0.00958385	0.0134267	0.0116154
0.994	-0.0245122	0.0198945	0.00208712	-0.00947684	0.013181	0.0117864
0.995	-0.0244421	0.0191678	0.00244804	-0.00929514	0.012862	0.0117272
0.996	-0.02419	0.0183297	0.00229193	-0.00910779	0.0125038	0.0113667
0.997	-0.0237718	0.0174455	0.00160721	-0.00895293	0.0121564	0.01069
0.998	-0.0233131	0.0166539	0.000703763	-0.00886114	0.0117902	0.00987698
0.999	-0.0229041	0.0159683	-4.06498e-05	-0.00887188	0.0114044	0.00914897
1	-0.022677	0.0152571	-0.000418127	-0.00898096	0.0110432	0.00860708
1.001	-0.0227602	0.0143372	-0.000421527	-0.00914456	0.0106909	0.00828151
1.002	-0.0231489	0.0131239	-0.000167547	-0.00931712	0.010335	0.00819624
1.003	-0.0237053	0.0116544	0.000244834	-0.00952089	0.0100442	0.0083004
1.004	-0.0243059	0.0100283	0.000776341	-0.009792	0.00991936	0.00845773
1.005	-0.0249463	0.00837581	0.00140354	-0.0100752	0.0100796	0.00862186
1.006	-0.0255781	0.00685608	0.00209761	-0.0102703	0.0105831	0.00890736
1.007	-0.0259959	0.00561546	0.00272579	-0.0103865	0.0113105	0.00939285
1.008	-0.0260395	0.00473402	0.0030567	-0.0105179	0.012048	0.00997855
1.009	-0.0257394	0.00430393	0.00292946	-0.0106543	0.0126706	0.0104957
1.01	-0.0251726	0.00444519	0.00223457	-0.0107271	0.0131721	0.0108406
1.011	-0.0244439	0.00515615	0.00084026	-0.0107475	0.013635	0.0110029
1.012	-0.0237955	0.00627987	-0.0012413	-0.0107352	0.0142823	0.0110497
1.013	-0.0234491	0.0076364	-0.00374088	-0.010654	0.0152556	0.011127
1.014	-0.0234345	0.00914468	-0.00633817	-0.0104955	0.0163606	0.0114065
1.015	-0.0236236	0.0108169	-0.00886688	-0.0103139	0.0173471	0.0118902
1.016	-0.0238868	0.0126283	-0.0112335	-0.0101451	0.0181713	0.0124151
1.017	-0.0242018	0.0145233	-0.0132813	-0.0100069	0.0188273	0.0129172
1.018	-0.0245721	0.0165243	-0.0148449	-0.00992996	0.0192565	0.0134499
1.019	-0.0249464	0.0186452	-0.0158469	-0.00988343	0.0194486	0.0140142
1.02	-0.0252404	0.020769	-0.0162691	-0.00981102	0.0194883	0.0145968
1.021	-0.0254095	0.0226842	-0.0161035	-0.00972116	0.0195547	0.0152265
1.022	-0.025476	0.0242767	-0.0153479	-0.009608	0.0197934	0.0158975
1.023	-0.0254826	0.0256364	-0.0140464	-0.00939296	0.0202198	0.0165711
1.024	-0.0255154	0.0268626	-0.012378	-0.00899758	0.0207811	0.0172214
1.025	-0.0256748	0.0280125	-0.010585	-0.00841727	0.0213479	0.0178305
1.026	-0.0259309	0.0293439	-0.0088105	-0.0077212	0.0217821	0.0183837
1.027	-0.0261232	0.0313336	-0.00711388	-0.00704438	0.0221028	0.01882
1.028	-0.0260965	0.034311	-0.00553342	-0.00649389	0.0224427	0.0190424
1.029	-0.0258318	0.038094	-0.00408463	-0.00601907	0.0228949	0.0190747
1.03	-0.0254714	0.0420757	-0.00271775	-0.00550884	0.0234578	0.0190468
1.031	-0.0250941	0.04567	-0.00125712	-0.00490964	0.024106	0.0190659
1.032	-0.0245164	0.0486003	0.000521438	-0.00417822	0.0248659	0.0191862
1.033	-0.0235111	0.0508742	0.00274912	-0.00328206	0.0257893	0.0193867
1.034	-0.0221124	0.0525792	0.0054943	-0.00228007	0.0269634	0.0196409
1.035	-0.020553	0.0537179	0.00882241	-0.00128171	0.0284735	0.0200211
1.036	-0.0190182	0.0542161	0.0127122	-0.000316164	0.0302734	0.020662
1.037	-0.0176057	0.0539873	0.017005	0.00067166	0.0322136	0.0216922
1.038	-0.0164613	0.0531035	0.021455	0.00169257	0.0341911	0.0231924
1.039	-0.01576	0.0518889	0.0257592	0.00267618	0.0361447	0.0251555
1.04	-0.0155957	0.0506443	0.0296282	0.00362634	0.0379553	0.0275177
1.041	-0.0159684	0.0494039	0.0329101	0.00463834	0.0395369	0.0301845
1.042	-0.0167674	0.0480551	0.0355974	0.00573109	0.0408897	0.0330064
1.043	-0.0177397	0.0465251	0.037726	0.00685258	0.0420058	0.035777
1.044	-0.0185978	0.0448385	0.039271	0.00793787	0.0429091	0.0382959
1.045	-0.0192505	0.04315	0.0401104	0.00881029	0.0436683	0.0404282
1.046	-0.0197691	0.0417216	0.0401257	0.00924769	0.0442846	0.0420865
1.047	-0.0200718	0.0407645	0.039339	0.00924683	0.0446789	0.0432385
1.048	-0.0199381	0.0402944	0.0378512	0.00895739	0.0447743	0.0439419
1.049	-0.0193493	0.0401985	0.0357085	0.00843814	0.0445608	0.0442826
1.05	-0.0185552	0.040398	0.0329849	0.00772647	0.0440795	0.0442808
1.051	-0.0177641	0.0408437	0.029861	0.00690685	0.0433922	0.0439308
1.052	-0.0169463	0.0413474	0.0264931	0.00599502	0.0426051	0.0432734
1.053	-0.0160345	0.0415534	0.022968	0.0049443	0.0418505	0.0423797
1.054	-0.0150675	0.0411526	0.0194276	0.00369173	0.0411346	0.0412699
1.055	-0.014066	0.0400312	0.016013	0.00220097	0.0402505	0.0399173
1.056	-0.0130581	0.0382109	0.0128284	0.000578427	0.0389724	0.0384198
1.057	-0.0121529	0.0357254	0.0101084	-0.000997428	0.0372335	0.0369318
1.058	-0.011449	0.0325663	0.00803401	-0.00241986	0.0351153	0.0354616
1.059	-0.0109326	0.0288157	0.0064851	-0.00363085	0.0327764	0.0339343
1.06	-0.0104464	0.0247689	0.00530758	-0.00462211	0.0303333	0.0323166
1.061	-0.00985856	0.0207942	0.0044742	-0.0054734	0.0278523	0.0306549
1.062	-0.00921121	0.0171036	0.0039545	-0.00629644	0.0253979	0.0289817
1.063	-0.00861621	0.0136911	0.00372416	-0.00715016	0.0230655	0.0272511
1.064	-0.00822476	0.0105101	0.00379568	-0.00799769	0.0210612	0.0254608
1.065	-0.00820602	0.0076339	0.00412226	-0.00873782	0.0195489	0.0236848
1.066	-0.00852265	0.00520075	0.00455584	-0.00927711	0.0184848	0.0220093
1.067	-0.00884379	0.00336226	0.00503008	-0.00953608	0.0178098	0.0205349
1.068	-0.00880442	0.00219844	0.00561135	-0.00944886	0.0175738	0.0193407
1.069	-0.00829676	0.00162146	0.00628492	-0.00898846	0.0178457	0.0184291
1.07	-0.0074048	0.00158901	0.00698164	-0.00820152	0.0185763	0.0177919
1.071	-0.00614234	0.00224223	0.00774885	-0.00720832	0.0195535	0.0174985
1.072	-0.00448886	0.00362988	0.00869889	-0.006168	0.0206235	0.0176127
1.073	-0.00263526	0.00556549	0.00985226	-0.00526958	0.0217998	0.0180777
1.074	-0.000882286	0.00776097	0.0110439	-0.00461898	0.0231295	0.0187719
1.075	0.000730658	0.00989955	0.0120202	-0.00423951	0.0246635	0.0195726
1.076	0.00234869	0.0117339	0.0126379	-0.00418964	0.0263917	0.0203815
1.077	0.00390374	0.0133412	0.0128215	-0.00443508	0.0281353	0.0211967
1.078	0.00519911	0.0153136	0.0124929	-0.00476068	0.0296793	0.0220638
1.079	0.00615358	0.0184913	0.0117573	-0.00492655	0.030904	0.0229099
1.08	0.00669606	0.0233217	0.0109013	-0.00484121	0.0317271	0.0235501
1.081	0.00680584	0.0295233	0.0101209	-0.00459888	0.0320845	0.0239139
1.082	0.00661998	0.0362855	0.00951354	-0.00432817	0.0320003	0.0241215
1.083	0.00617065	0.0426603	0.00924733	-0.00405961	0.0315968	0.0243125
1.084	0.00530306	0.047937	0.00940513	-0.00379324	0.0310358	0.0245219
1.085	0.00404457	0.0518369	0.00981146	-0.00357925	0.0305003	0.0246687
1.086	0.00272053	0.054414	0.0102303	-0.00347918	0.0301705	0.024641
1.087	0.0016285	0.0558193	0.0105248	-0.0035312	0.0301261	0.0244182
1.088	0.000891324	0.0562105	0.0106135	-0.00375976	0.0303053	0.0241168
1.089	0.00061745	0.055788	0.0104972	-0.00413398	0.0305857	0.023942
1.09	0.000937715	0.0547447	0.0103101	-0.00453531	0.0308599	0.0240156
1.091	0.00181576	0.0532764	0.0102334	-0.00485077	0.0310652	0.0242861
1.092	0.00294101	0.0516413	0.0103542	-0.00505035	0.0311727	0.0246454
1.093	0.0039485	0.0500373	0.0106857	-0.00512171	0.0311557	0.0249601
1.094	0.00464025	0.0484843	0.0113354	-0.00497051	0.0310466	0.0250215
1.095	0.00491529	0.0469374	0.0124982	-0.00446931	0.0309404	0.024692
1.096	0.00457768	0.0454482	0.0143222	-0.00361278	0.0308786	0.0240697
1.097	0.003285	0.0441336	0.016928	-0.00251386	0.0308455	0.0233935
1.098	0.000740518	0.0430814	0.0204726	-0.00129815	0.0308629	0.0228504
1.099	-0.0031742	0.0423236	0.0250413	-8.38111e-05	0.0310571	0.0225419
1.1	-0.00846825	0.0417995	0.0305794	0.00097555	0.0316366	0.0225825
1.101	-0.0151184	0.0413471	0.0369243	0.00165792	0.0327432	0.0231217
1.102	-0.0230707	0.0407182	0.0437262	0.0017288	0.034326	0.0242739
1.103	-0.0322687	0.03969	0.0505466	0.00102603	0.0361425	0.0260901
1.104	-0.0427076	0.038255	0.0569692	-0.000548988	0.0378093	0.0285251
1.105	-0.0544664	0.0365451	0.0624742	-0.00316048	0.0389081	0.0314038
1.106	-0.0677569	0.034626	0.0664968	-0.00713862	0.0391235	0.0344585
1.107	-0.082827	0.0324135	0.0685773	-0.0128958	0.0382577	0.0373009
1.108	-0.0998286	0.0296544	0.0682968	-0.0207841	0.0360982	0.0393953
1.109	-0.118886	0.0260306	0.0651702	-0.0310671	0.0323427	0.0401694
1.11	-0.14011	0.0212114	0.0587789	-0.0439772	0.0266711	0.0390724
1.111	-0.163481	0.0148359	0.048979	-0.0596826	0.0188192	0.0355943
1.112	-0.18883	0.00664154	0.0358266	-0.0781964	0.00859445	0.0293225
1.113	-0.215898	-0.0034825	0.0193553	-0.0994193	-0.00407683	0.019943
1.114	-0.244442	-0.0156061	-0.000418404	-0.12329	-0.0190975	0.00731191
1.115	-0.27431	-0.0297845	-0.023269	-0.149834	-0.0363344	-0.00847711
1.116	-0.305396	-0.0459508	-0.0487227	-0.179018	-0.0558157	-0.0272583
1.117	-0.337573	-0.0639066	-0.0762103	-0.210694	-0.0776994	-0.0489464
1.118	-0.37067	-0.0834871	-0.105197	-0.244687	-0.102099	-0.0734284
1.119	-0.404421	-0.104589	-0.135295	-0.280852	-0.129	-0.100475
1.12	-0.438487	-0.127053	-0.16626	-0.319066	-0.158272	-0.12989
1.121	-0.472607	-0.150644	-0.197854	-0.359158	-0.189646	-0.161548
1.122	-0.506623	-0.175096	-0.229779	-0.400898	-0.222727	-0.195292
1.123	-0.540336	-0.200157	-0.261787	-0.444094	-0.257207	-0.230928
1.124	-0.573545	-0.225608	-0.293773	-0.488596	-0.292977	-0.268219
1.125	-0.6062	-0.251249	-0.325732	-0.534245	-0.329985	-0.306931
1.126	-0.638351	-0.276899	-0.357704	-0.580889	-0.36813	-0.346932
1.127	-0.670069	-0.302483	-0.389777	-0.628445	-0.407322	-0.388101
1.128	-0.701452	-0.328069	-0.421991	-0.676834	-0.447593	-0.430225
1.129	-0.732582	-0.353793	-0.45422	-0.725903	-0.488999	-0.47312
1.13	-0.763576	-0.379779	-0.486287	-0.775559	-0.531388	-0.51672
1.131	-0.794524	-0.406061	-0.518141	-0.825842	-0.574493	-0.561004
1.132	-0.825344	-0.432543	-0.549776	-0.876647	-0.618153	-0.605962
1.133	-0.855841	-0.459097	-0.581126	-0.927649	-0.662226	-0.651555
1.134	-0.8858	-0.485612	-0.612167	-0.978615	-0.706506	-0.697621
1.135	-0.915049	-0.511948	-0.642913	-1.02948	-0.750806	-0.74387
1.136	-0.943565	-0.537959	-0.673284	-1.08014	-0.794973	-0.790033
1.137	-0.97143	-0.563506	-0.70308	-1.13036	-0.838941	-0.836001
1.138	-0.998675	-0.588395	-0.732054	-1.1799	-0.882776	-0.88171
1.139	-1.0253	-0.612241	-0.760037	-1.22861	-0.926455	-0.927024
1.14	-1.0514	-0.634557	-0.787015	-1.2764	-0.969861	-0.971785
1.141	-1.07714	-0.655196	-0.813129	-1.32322	-1.01295	-1.01589
1.142	-1.10257	-0.674541	-0.838534	-1.36898	-1.05564	-1.0593
1.143	-1.1277	-0.693171	-0.863236	-1.41362	-1.09775	-1.10198
1.144	-1.15258	-0.711568	-0.887251	-1.45715	-1.13909	-1.14391
1.145	-1.17712	-0.730081	-0.910737	-1.49967	-1.17956	-1.18511
1.146	-1.20107	-0.748934	-0.9338	-1.54116	-1.21916	-1.22557
1.147	-1.22412	-0.768211	-0.956396	-1.58158	-1.25786	-1.2652
1.148	-1.24615	-0.787886	-0.978392	-1.62088	-1.29562	-1.30392
1.149	-1.26721	-0.807941	-0.999584	-1.65908	-1.33236	-1.34162
1.15	-1.28739	-0.828327	-1.01982	-1.69622	-1.36799	-1.37818
1.151	-1.30675	-0.848856	-1.03907	-1.73224	-1.40251	-1.41352
1.152	-1.32516	-0.869296	-1.05736	-1.76703	-1.43605	-1.44753
1.153	-1.34228	-0.889499	-1.07471	-1.80055	-1.46855	-1.48012
1.154	-1.35804	-0.909372	-1.09117	-1.83274	-1.49984	-1.51128
1.155	-1.37271	-0.928789	-1.10679	-1.86352	-1.52981	-1.54108
1.156	-1.38669	-0.947588	-1.12165	-1.8929	-1.55842	-1.56956
1.157	-1.40023	-0.965631	-1.13583	-1.92092	-1.5856	-1.59679
1.158	-1.41343	-0.982816	-1.14929	-1.94755	-1.61128	-1.62283
1.159	-1.42629	-0.999063	-1.16182	-1.9727	-1.6355	-1.64773
1.16	-1.43876	-1.01437	-1.17348	-1.99647	-1.65835	-1.6715
1.161	-1.45077	-1.02885	-1.18456	-2.01916	-1.67993	-1.69413
1.162	-1.46236	-1.04257	-1.19522	-2.04082	-1.70024	-1.71561
1.163	-1.47347	-1.05541	-1.20542	-2.06131	-1.71932	-1.73594
1.164	-1.4839	-1.06725	-1.21506	-2.08059	-1.73729	-1.75505
1.165	-1.49354	-1.07813	-1.22403	-2.09877	-1.75425	-1.77285
1.166	-1.50236	-1.08807	-1.23233	-2.11593	-1.77017	-1.78937
1.167	-1.51039	-1.09705	-1.23992	-2.13216	-1.78504	-1.80477
1.168	-1.5177	-1.1051	-1.24671	-2.14757	-1.79899	-1.81916
1.169	-1.5243	-1.11241	-1.25272	-2.16208	-1.81212	-1.83252
1.17	-1.53016	-1.11907	-1.25809	-2.17559	-1.82438	-1.84479
1.171	-1.53522	-1.12496	-1.26292	-2.18809	-1.83574	-1.85604
1.172	-1.53946	-1.1299	-1.26727	-2.19977	-1.84623	-1.86642
1.173	-1.54291	-1.13398	-1.27118	-2.21087	-1.85593	-1.876
1.174	-1.54564	-1.13737	-1.27479	-2.22152	-1.86492	-1.88478
1.175	-1.54786	-1.14023	-1.27811	-2.23167	-1.87322	-1.89277
1.176	-1.54989	-1.14266	-1.28099	-2.24118	-1.88079	-1.89997
1.177	-1.55187	-1.14479	-1.2835	-2.24986	-1.88754	-1.90637
1.178	-1.55377	-1.14675	-1.28586	-2.25759	-1.89343	-1.91198
1.179	-1.55554	-1.14863	-1.28798	-2.26437	-1.89853	-1.91683
1.18	-1.55721	-1.15037	-1.28963	-2.27018	-1.90284	-1.92098
1.181	-1.55877	-1.15189	-1.29073	-2.27513	-1.9064	-1.92458
1.182	-1.56018	-1.15318	-1.29136	-2.27952	-1.90936	-1.92772
1.183	-1.5613	-1.15411	-1.29161	-2.28358	-1.91185	-1.93043
1.184	-1.56205	-1.15457	-1.29158	-2.28737	-1.91389	-1.93271
1.185	-1.56249	-1.15443	-1.29131	-2.29085	-1.91546	-1.93452
1.186	-1.56269	-1.15355	-1.29077	-2.29389	-1.91661	-1.93586
1.187	-1.56261	-1.15193	-1.28999	-2.29631	-1.91748	-1.93679
1.188	-1.56238	-1.14976	-1.28906	-2.29806	-1.91813	-1.93734
1.189	-1.56219	-1.14725	-1.28813	-2.29922	-1.9185	-1.93752
1.19	-1.56213	-1.14463	-1.28733	-2.29987	-1.91848	-1.93731
1.191	-1.56207	-1.14186	-1.28661	-2.30005	-1.91806	-1.93661
1.192	-1.56188	-1.13878	-1.28584	-2.29975	-1.91734	-1.93539
1.193	-1.56136	-1.13533	-1.28499	-2.29902	-1.91638	-1.93383
1.194	-1.56037	-1.13158	-1.28398	-2.29787	-1.9151	-1.93219
1.195	-1.55886	-1.12762	-1.28261	-2.29632	-1.91341	-1.93052
1.196	-1.55689	-1.12368	-1.28063	-2.29449	-1.91129	-1.92883
1.197	-1.55455	-1.12001	-1.27803	-2.29253	-1.9088	-1.92711
1.198	-1.55194	-1.11685	-1.27496	-2.2905	-1.90597	-1.92531
1.199	-1.54923	-1.11439	-1.27161	-2.28837	-1.90295	-1.92328
1.2	-1.54657	-1.11275	-1.26817	-2.2862	-1.89986	-1.92084
1.201	-1.54394	-1.11186	-1.26486	-2.28408	-1.89661	-1.9179
1.202	-1.54132	-1.11144	-1.26182	-2.28201	-1.89297	-1.9144
1.203	-1.53866	-1.11114	-1.2591	-2.27989	-1.88897	-1.91044
1.204	-1.53584	-1.11084	-1.25667	-2.27765	-1.88483	-1.9061
1.205	-1.53273	-1.11045	-1.25454	-2.27531	-1.88068	-1.90148
1.206	-1.5293	-1.10981	-1.25263	-2.27277	-1.87654	-1.89674
1.207	-1.52567	-1.10878	-1.25091	-2.26991	-1.87242	-1.89196
1.208	-1.52203	-1.10741	-1.24927	-2.26658	-1.86845	-1.88715
1.209	-1.51849	-1.10596	-1.24743	-2.26267	-1.86483	-1.88229
1.21	-1.51507	-1.10465	-1.24511	-2.25821	-1.86157	-1.87729
1.211	-1.51174	-1.10341	-1.24226	-2.25344	-1.85851	-1.8721
1.212	-1.50848	-1.10183	-1.23902	-2.24857	-1.85546	-1.86681
1.213	-1.50529	-1.09958	-1.23548	-2.24367	-1.85225	-1.8615
1.214	-1.50212	-1.0966	-1.23158	-2.23866	-1.84875	-1.85613
1.215	-1.49885	-1.09295	-1.22733	-2.23356	-1.84482	-1.85062
1.216	-1.49543	-1.08876	-1.22286	-2.22847	-1.84028	-1.84493
1.217	-1.49193	-1.08438	-1.21824	-2.22351	-1.83509	-1.83912
1.218	-1.48847	-1.08017	-1.2135	-2.21867	-1.82942	-1.83329
1.219	-1.48497	-1.07633	-1.2088	-2.21382	-1.82359	-1.82754
1.22	-1.48129	-1.07279	-1.20436	-2.20886	-1.81781	-1.8219
1.221	-1.47738	-1.06944	-1.20016	-2.20376	-1.81218	-1.81631
1.222	-1.47324	-1.06625	-1.19603	-2.19855	-1.8067	-1.81067
1.223	-1.469	-1.0632	-1.19189	-2.19323	-1.8014	-1.80492
1.224	-1.46493	-1.06023	-1.18789	-2.18769	-1.79614	-1.79904
1.225	-1.46121	-1.0573	-1.18415	-2.18188	-1.79068	-1.79298
1.226	-1.45791	-1.05426	-1.18077	-2.17587	-1.78484	-1.78673
1.227	-1.45491	-1.05097	-1.17775	-2.16971	-1.77867	-1.78038
1.228	-1.45199	-1.04751	-1.17507	-2.16337	-1.77224	-1.77402
1.229	-1.44898	-1.04409	-1.17274	-2.15686	-1.76553	-1.76771
1.23	-1.44577	-1.04082	-1.17082	-2.15026	-1.75861	-1.76155
1.231	-1.44228	-1.03768	-1.16917	-2.14371	-1.75162	-1.75558
1.232	-1.43848	-1.03466	-1.16747	-2.1373	-1.74465	-1.74978
1.233	-1.43442	-1.03175	-1.16532	-2.13112	-1.73773	-1.74405
1.234	-1.43027	-1.02891	-1.16263	-2.12525	-1.73088	-1.73832
1.235	-1.42619	-1.02609	-1.15954	-2.11956	-1.72409	-1.73257
1.236	-1.42229	-1.02321	-1.15625	-2.11387	-1.71738	-1.72674
1.237	-1.41865	-1.02019	-1.15297	-2.10812	-1.71076	-1.72083
1.238	-1.41527	-1.01696	-1.14982	-2.10232	-1.7043	-1.71487
1.239	-1.41204	-1.01355	-1.14681	-2.09643	-1.6981	-1.70897
1.24	-1.40882	-1.01015	-1.14401	-2.0904	-1.69219	-1.70314
1.241	-1.40538	-1.00683	-1.14156	-2.0842	-1.68655	-1.69732
1.242	-1.40155	-1.00339	-1.13946	-2.07785	-1.68106	-1.69142
1.243	-1.3973	-0.999504	-1.13742	-2.07134	-1.67554	-1.68533
1.244	-1.39287	-0.995034	-1.13513	-2.0647	-1.66984	-1.67905
1.245	-1.38854	-0.990077	-1.1324	-2.05804	-1.66382	-1.67278
1.246	-1.38453	-0.984893	-1.12923	-2.05143	-1.65742	-1.66669
1.247	-1.38098	-0.97986	-1.12569	-2.04491	-1.65081	-1.66073
1.248	-1.37781	-0.975241	-1.12186	-2.03838	-1.64416	-1.65484
1.249	-1.37475	-0.971003	-1.11785	-2.03165	-1.63755	-1.64903
1.25	-1.37163	-0.967042	-1.1138	-2.02458	-1.63098	-1.64339
1.251	-1.36834	-0.963387	-1.10988	-2.01726	-1.62446	-1.63799
1.252	-1.36481	-0.960023	-1.10625	-2.00986	-1.61807	-1.63279
1.253	-1.36098	-0.956832	-1.10279	-2.00257	-1.61191	-1.62766
1.254	-1.35683	-0.953815	-1.09923	-1.9955	-1.60608	-1.62254
1.255	-1.35244	-0.951106	-1.0954	-1.98864	-1.6005	-1.61747
1.256	-1.34798	-0.948799	-1.09131	-1.98184	-1.59498	-1.61242
1.257	-1.34361	-0.946882	-1.08701	-1.975	-1.58936	-1.60727
1.258	-1.33939	-0.945362	-1.08252	-1.96814	-1.58366	-1.60197
1.259	-1.33528	-0.944321	-1.07795	-1.96132	-1.57796	-1.59652
1.26	-1.33124	-0.943743	-1.07351	-1.95461	-1.57229	-1.59089
1.261	-1.32723	-0.943405	-1.0693	-1.94801	-1.56668	-1.58502
1.262	-1.3232	-0.943056	-1.06527	-1.9414	-1.56121	-1.57893
1.263	-1.31919	-0.942485	-1.06132	-1.93465	-1.55592	-1.57275
1.264	-1.31527	-0.941539	-1.05745	-1.92768	-1.55082	-1.56668
1.265	-1.31149	-0.940231	-1.0537	-1.92053	-1.54593	-1.56086
1.266	-1.30781	-0.938599	-1.0501	-1.9133	-1.54119	-1.55527
1.267	-1.30409	-0.936527	-1.04664	-1.90603	-1.53645	-1.5498
1.268	-1.30019	-0.933975	-1.04339	-1.89882	-1.53146	-1.54429
1.269	-1.29611	-0.93115	-1.04052	-1.89173	-1.52602	-1.53861
1.27	-1.2919	-0.928231	-1.03811	-1.88474	-1.52016	-1.53269
1.271	-1.28759	-0.92516	-1.03604	-1.87785	-1.51405	-1.52661
1.272	-1.28328	-0.921833	-1.03403	-1.87119	-1.50781	-1.52054
1.273	-1.2791	-0.918243	-1.03189	-1.86479	-1.5016	-1.5146
1.274	-1.27514	-0.914394	-1.02952	-1.8585	-1.49554	-1.50877
1.275	-1.27135	-0.91028	-1.02687	-1.85214	-1.4897	-1.50303
1.276	-1.26761	-0.905969	-1.02386	-1.84566	-1.48405	-1.49743
1.277	-1.26385	-0.901664	-1.0205	-1.83905	-1.47849	-1.49193
1.278	-1.26002	-0.897607	-1.01706	-1.83232	-1.47292	-1.48643
1.279	-1.25606	-0.893909	-1.01373	-1.82548	-1.46727	-1.48082
1.28	-1.25203	-0.890539	-1.01051	-1.81852	-1.4615	-1.47514
1.281	-1.24795	-0.887429	-1.00727	-1.81153	-1.4556	-1.4694
1.282	-1.24381	-0.884541	-1.00399	-1.80453	-1.44955	-1.46359
1.283	-1.23962	-0.881811	-1.00067	-1.79747	-1.44333	-1.45767
1.284	-1.23541	-0.87907	-0.997223	-1.79027	-1.43694	-1.4517
1.285	-1.23127	-0.876185	-0.993613	-1.78303	-1.43042	-1.44572
1.286	-1.2272	-0.873218	-0.989955	-1.77589	-1.42379	-1.43965
1.287	-1.22308	-0.870279	-0.986336	-1.76892	-1.41703	-1.43343
1.288	-1.21884	-0.867353	-0.982803	-1.76218	-1.41019	-1.42713
1.289	-1.21453	-0.864345	-0.97949	-1.75568	-1.40341	-1.42084
1.29	-1.2103	-0.861202	-0.976604	-1.74934	-1.39682	-1.41463
1.291	-1.20636	-0.857997	-0.974169	-1.74307	-1.39047	-1.40851
1.292	-1.20279	-0.854892	-0.972013	-1.73681	-1.38438	-1.4025
1.293	-1.19955	-0.851965	-0.969968	-1.73047	-1.37852	-1.39658
1.294	-1.19647	-0.849147	-0.967873	-1.72402	-1.37291	-1.39075
1.295	-1.19346	-0.846289	-0.965572	-1.71748	-1.36754	-1.3851
1.296	-1.19048	-0.843292	-0.963006	-1.7109	-1.36229	-1.37967
1.297	-1.18749	-0.840212	-0.960218	-1.70429	-1.35708	-1.37436
1.298	-1.18441	-0.837204	-0.957267	-1.69763	-1.35187	-1.36902
1.299	-1.18117	-0.83439	-0.954088	-1.69087	-1.34675	-1.36361
1.3	-1.17785	-0.831861	-0.950534	-1.68406	-1.34176	-1.35815
1.301	-1.17446	-0.82963	-0.946674	-1.67731	-1.33687	-1.35264
1.302	-1.17087	-0.827477	-0.942809	-1.67064	-1.33199	-1.34704
1.303	-1.167	-0.825132	-0.939136	-1.66405	-1.3271	-1.34133
1.304	-1.16285	-0.822611	-0.93562	-1.65752	-1.32224	-1.33559
1.305	-1.1585	-0.820048	-0.932204	-1.65109	-1.31748	-1.32996
1.306	-1.15413	-0.817453	-0.928975	-1.64484	-1.31288	-1.32455
1.307	-1.1499	-0.814859	-0.926093	-1.63887	-1.3084	-1.31932
1.308	-1.1458	-0.812336	-0.923653	-1.63317	-1.30389	-1.31415
1.309	-1.14166	-0.809835	-0.921562	-1.62763	-1.29921	-1.30882
1.31	-1.13735	-0.807305	-0.919521	-1.62205	-1.29427	-1.30318
1.311	-1.13297	-0.804809	-0.917264	-1.61621	-1.28906	-1.29726
1.312	-1.12877	-0.802422	-0.914782	-1.61003	-1.28363	-1.29118
1.313	-1.12482	-0.800163	-0.912192	-1.60365	-1.27808	-1.28509
1.314	-1.12104	-0.798126	-0.909545	-1.59728	-1.2725	-1.27914
1.315	-1.11737	-0.796408	-0.906883	-1.59103	-1.26691	-1.27342
1.316	-1.11379	-0.794862	-0.904306	-1.58494	-1.26125	-1.26799
1.317	-1.11028	-0.793168	-0.901868	-1.57903	-1.2555	-1.26286
1.318	-1.10675	-0.791117	-0.89948	-1.57327	-1.24977	-1.25795
1.319	-1.10308	-0.788688	-0.896966	-1.56774	-1.24413	-1.25325
1.32	-1.09927	-0.785936	-0.894231	-1.56249	-1.2387	-1.2488
1.321	-1.0954	-0.78298	-0.891354	-1.55755	-1.23361	-1.24452
1.322	-1.09159	-0.779973	-0.888436	-1.55293	-1.2289	-1.24026
1.323	-1.0879	-0.776928	-0.885473	-1.54845	-1.22442	-1.23602
1.324	-1.08425	-0.773713	-0.882404	-1.54378	-1.22002	-1.23185
1.325	-1.08059	-0.770313	-0.879129	-1.53863	-1.2157	-1.22782
1.326	-1.07697	-0.766893	-0.875564	-1.53295	-1.21145	-1.22398
1.327	-1.07355	-0.763601	-0.871726	-1.52685	-1.20725	-1.22033
1.328	-1.07056	-0.760519	-0.867654	-1.52049	-1.20306	-1.21677
1.329	-1.06819	-0.757753	-0.863377	-1.51407	-1.19885	-1.21315
1.33	-1.06634	-0.755461	-0.859003	-1.50772	-1.19462	-1.20937
1.331	-1.06469	-0.753681	-0.854631	-1.50153	-1.1903	-1.20535
1.332	-1.06304	-0.752223	-0.850303	-1.49557	-1.18585	-1.20104
1.333	-1.06127	-0.750826	-0.846141	-1.48988	-1.18133	-1.19646
1.334	-1.05921	-0.749308	-0.842261	-1.48449	-1.17676	-1.19162
1.335	-1.05664	-0.747481	-0.838676	-1.47936	-1.17207	-1.18644
1.336	-1.05342	-0.74522	-0.835475	-1.47444	-1.16731	-1.18096
1.337	-1.04957	-0.742612	-0.832827	-1.4696	-1.16257	-1.17529
1.338	-1.04532	-0.739834	-0.830811	-1.46466	-1.158	-1.16963
1.339	-1.0409	-0.736942	-0.829422	-1.45947	-1.15367	-1.16417
1.34	-1.03646	-0.733896	-0.828658	-1.45399	-1.14948	-1.15912
1.341	-1.03213	-0.730736	-0.828527	-1.4482	-1.14519	-1.15459
1.342	-1.02808	-0.727608	-0.828894	-1.44215	-1.14073	-1.15054
1.343	-1.02436	-0.724647	-0.829462	-1.43593	-1.13624	-1.14684
1.344	-1.02096	-0.721959	-0.829939	-1.42967	-1.13187	-1.14339
1.345	-1.01791	-0.719609	-0.830117	-1.42346	-1.12766	-1.14016
1.346	-1.01522	-0.717627	-0.829845	-1.41739	-1.12347	-1.13708
1.347	-1.01275	-0.716014	-0.829041	-1.41156	-1.11918	-1.13396
1.348	-1.01033	-0.714744	-0.827724	-1.40603	-1.11479	-1.13064
1.349	-1.00784	-0.713862	-0.826015	-1.4009	-1.11039	-1.12703
1.35	-1.00528	-0.71341	-0.824018	-1.39617	-1.10616	-1.12316
1.351	-1.00263	-0.713156	-0.821722	-1.3917	-1.1022	-1.11912
1.352	-0.999954	-0.712729	-0.819091	-1.3873	-1.09842	-1.115
1.353	-0.997228	-0.711948	-0.816136	-1.38292	-1.09473	-1.11088
1.354	-0.994344	-0.710752	-0.812942	-1.3785	-1.09107	-1.10679
1.355	-0.99124	-0.709079	-0.809619	-1.37389	-1.08728	-1.10269
1.356	-0.98797	-0.706964	-0.806195	-1.36901	-1.08325	-1.09855
1.357	-0.984587	-0.704506	-0.802655	-1.36385	-1.079	-1.09442
1.358	-0.981109	-0.70176	-0.799002	-1.35847	-1.07464	-1.09042
1.359	-0.977691	-0.698823	-0.795251	-1.35299	-1.07025	-1.08661
1.36	-0.974572	-0.695869	-0.791511	-1.34753	-1.06581	-1.083
1.361	-0.971707	-0.693048	-0.787969	-1.34211	-1.06138	-1.07956
1.362	-0.968773	-0.690436	-0.784773	-1.33678	-1.05711	-1.0762
1.363	-0.965579	-0.688091	-0.782003	-1.3316	-1.05308	-1.07289
1.364	-0.962202	-0.686043	-0.779653	-1.32669	-1.04925	-1.06956
1.365	-0.958784	-0.684192	-0.777707	-1.32211	-1.04561	-1.06608
1.366	-0.955432	-0.68249	-0.776224	-1.31784	-1.04215	-1.06233
1.367	-0.952236	-0.681031	-0.775205	-1.3139	-1.03883	-1.05838
1.368	-0.949214	-0.679759	-0.774525	-1.31021	-1.03565	-1.05444
1.369	-0.946284	-0.678427	-0.774041	-1.30664	-1.03263	-1.05056
1.37	-0.943309	-0.67682	-0.773553	-1.30298	-1.0298	-1.04658
1.371	-0.940177	-0.674811	-0.772806	-1.29905	-1.02711	-1.04236
1.372	-0.936804	-0.672383	-0.771678	-1.2948	-1.02445	-1.03799
1.373	-0.933163	-0.669734	-0.770127	-1.29039	-1.02167	-1.03362
1.374	-0.929306	-0.667218	-0.768047	-1.28587	-1.01876	-1.02933
1.375	-0.925287	-0.665101	-0.765436	-1.28121	-1.0158	-1.02509
1.376	-0.921226	-0.663395	-0.762461	-1.27638	-1.01273	-1.0209
1.377	-0.917376	-0.661942	-0.759306	-1.27134	-1.00931	-1.01686
1.378	-0.913974	-0.660587	-0.756135	-1.26605	-1.00525	-1.01312
1.379	-0.911138	-0.659219	-0.753132	-1.26063	-1.00041	-1.00972
1.38	-0.908857	-0.657739	-0.750403	-1.2553	-0.994897	-1.00656
1.381	-0.906961	-0.656082	-0.74787	-1.25015	-0.988989	-1.0034
1.382	-0.905219	-0.65427	-0.745419	-1.24513	-0.982933	-1.00005
1.383	-0.903458	-0.652382	-0.743024	-1.24014	-0.976956	-0.996567
1.384	-0.901475	-0.65051	-0.740654	-1.23521	-0.971221	-0.993053
1.385	-0.899084	-0.648742	-0.738224	-1.23043	-0.965734	-0.98949
1.386	-0.896248	-0.647056	-0.735601	-1.22588	-0.960479	-0.985909
1.387	-0.893066	-0.645295	-0.732665	-1.2215	-0.955618	-0.982418
1.388	-0.889741	-0.643362	-0.729446	-1.21708	-0.951334	-0.979062
1.389	-0.886491	-0.641257	-0.726157	-1.21251	-0.947561	-0.97577
1.39	-0.883432	-0.638973	-0.723126	-1.20783	-0.944065	-0.972321
1.391	-0.880567	-0.636482	-0.720615	-1.20318	-0.940703	-0.96859
1.392	-0.877786	-0.633784	-0.718649	-1.19864	-0.937535	-0.964709
1.393	-0.874992	-0.63092	-0.717056	-1.19427	-0.93469	-0.960819
1.394	-0.872289	-0.627995	-0.71569	-1.19006	-0.932194	-0.956967
1.395	-0.869844	-0.625194	-0.714519	-1.18594	-0.929956	-0.953229
1.396	-0.867677	-0.622699	-0.713497	-1.18189	-0.927858	-0.9497
1.397	-0.865765	-0.620577	-0.712438	-1.17796	-0.925804	-0.94645
1.398	-0.864183	-0.618732	-0.711082	-1.17431	-0.923672	-0.943518
1.399	-0.862982	-0.617045	-0.709224	-1.17099	-0.921467	-0.940859
1.4	-0.862056	-0.615479	-0.706821	-1.16792	-0.919378	-0.9383
1.401	-0.861212	-0.61394	-0.704023	-1.16493	-0.917475	-0.935655
1.402	-0.860299	-0.612231	-0.701109	-1.16181	-0.915628	-0.932869
1.403	-0.859165	-0.610216	-0.698278	-1.15849	-0.913643	-0.929975
1.404	-0.857633	-0.607985	-0.695572	-1.15505	-0.911396	-0.926987
1.405	-0.855591	-0.605797	-0.692912	-1.15155	-0.908994	-0.923897
1.406	-0.853019	-0.603758	-0.690184	-1.14796	-0.906641	-0.920701
1.407	-0.849969	-0.601737	-0.687426	-1.14417	-0.904397	-0.917422
1.408	-0.846539	-0.599685	-0.684798	-1.14018	-0.902254	-0.914172
1.409	-0.842897	-0.597794	-0.682372	-1.13612	-0.900162	-0.911073
1.41	-0.83931	-0.596232	-0.680154	-1.132	-0.897953	-0.90817
1.411	-0.836036	-0.59496	-0.678087	-1.12769	-0.895484	-0.90544
1.412	-0.833188	-0.593902	-0.675913	-1.12317	-0.892703	-0.902757
1.413	-0.830684	-0.593043	-0.673375	-1.11858	-0.889548	-0.899915
1.414	-0.828312	-0.592298	-0.670537	-1.1141	-0.886046	-0.896794
1.415	-0.825947	-0.59151	-0.66766	-1.10982	-0.882367	-0.893453
1.416	-0.823651	-0.59053	-0.664952	-1.10572	-0.878613	-0.890051
1.417	-0.821501	-0.589194	-0.662527	-1.10177	-0.874744	-0.886724
1.418	-0.819454	-0.587403	-0.660378	-1.09792	-0.870796	-0.883492
1.419	-0.81742	-0.585272	-0.658452	-1.09417	-0.866938	-0.880227
1.42	-0.815305	-0.583	-0.656752	-1.09043	-0.863278	-0.876723
1.421	-0.812938	-0.580707	-0.655244	-1.08649	-0.859856	-0.872834
1.422	-0.810161	-0.578443	-0.653808	-1.08216	-0.856708	-0.868549
1.423	-0.807018	-0.5761	-0.652344	-1.07745	-0.853799	-0.864029
1.424	-0.803687	-0.573534	-0.650857	-1.07258	-0.851016	-0.859422
1.425	-0.800322	-0.570823	-0.64948	-1.06789	-0.84826	-0.85477
1.426	-0.79705	-0.568187	-0.648319	-1.06364	-0.845475	-0.850171
1.427	-0.793964	-0.565792	-0.647293	-1.05994	-0.842638	-0.845779
1.428	-0.791044	-0.563715	-0.646141	-1.05672	-0.839767	-0.841723
1.429	-0.788179	-0.56205	-0.644651	-1.0538	-0.836897	-0.838149
1.43	-0.785391	-0.560909	-0.642841	-1.05097	-0.834029	-0.835109
1.431	-0.782902	-0.560264	-0.640888	-1.0482	-0.831042	-0.83246
1.432	-0.780833	-0.559971	-0.639016	-1.04552	-0.827785	-0.830041
1.433	-0.779113	-0.55989	-0.637364	-1.04284	-0.824236	-0.82777
1.434	-0.777709	-0.559924	-0.635912	-1.04007	-0.820438	-0.825519
1.435	-0.776593	-0.560005	-0.634688	-1.03716	-0.816455	-0.823123
1.436	-0.775556	-0.560043	-0.633814	-1.03412	-0.81244	-0.820549
1.437	-0.774298	-0.559809	-0.633269	-1.03089	-0.808633	-0.817903
1.438	-0.772636	-0.559033	-0.63286	-1.02741	-0.80521	-0.815228
1.439	-0.770501	-0.55759	-0.632418	-1.0237	-0.802137	-0.812486
1.44	-0.767915	-0.55555	-0.631907	-1.0198	-0.799199	-0.809739
1.441	-0.765105	-0.553158	-0.631412	-1.01578	-0.796231	-0.807064
1.442	-0.762383	-0.55074	-0.631018	-1.0118	-0.7932	-0.804418
1.443	-0.759869	-0.548548	-0.630762	-1.00799	-0.790049	-0.801733
1.444	-0.757503	-0.546705	-0.630717	-1.0043	-0.786783	-0.798995
1.445	-0.755248	-0.545275	-0.630832	-1.0006	-0.783541	-0.79621
1.446	-0.75309	-0.544329	-0.630828	-0.996798	-0.780394	-0.793412
1.447	-0.75099	-0.543942	-0.630433	-0.992926	-0.777331	-0.790696
1.448	-0.748953	-0.544116	-0.629552	-0.989121	-0.77437	-0.788137
1.449	-0.746976	-0.544731	-0.628194	-0.985469	-0.771513	-0.785703
1.45	-0.74487	-0.545573	-0.626382	-0.981965	-0.768741	-0.783316
1.451	-0.74245	-0.546362	-0.62416	-0.978533	-0.766008	-0.781004
1.452	-0.73988	-0.546822	-0.621564	-0.975098	-0.763204	-0.778827
1.453	-0.737433	-0.546776	-0.618579	-0.971664	-0.760257	-0.776724
1.454	-0.735237	-0.546143	-0.615227	-0.968282	-0.757248	-0.774603
1.455	-0.733427	-0.544893	-0.611608	-0.964946	-0.754344	-0.77252
1.456	-0.732022	-0.543026	-0.607897	-0.961624	-0.751644	-0.770631
1.457	-0.730858	-0.540622	-0.604304	-0.958271	-0.749143	-0.769021
1.458	-0.729761	-0.537912	-0.601041	-0.954835	-0.746765	-0.767669
1.459	-0.728632	-0.53522	-0.598273	-0.951355	-0.74444	-0.766493
1.46	-0.727514	-0.532828	-0.595972	-0.947952	-0.742147	-0.765417
1.461	-0.726562	-0.530898	-0.593985	-0.944709	-0.739861	-0.764315
1.462	-0.725839	-0.529475	-0.592277	-0.941603	-0.737613	-0.762973
1.463	-0.725209	-0.528536	-0.590891	-0.938578	-0.735507	-0.76124
1.464	-0.7244	-0.528026	-0.589743	-0.935628	-0.733545	-0.7591
1.465	-0.723128	-0.527823	-0.58859	-0.932697	-0.731552	-0.756606
1.466	-0.721247	-0.527699	-0.587195	-0.929706	-0.729328	-0.753851
1.467	-0.718913	-0.527391	-0.58547	-0.926652	-0.72682	-0.750944
1.468	-0.716463	-0.526746	-0.583463	-0.923623	-0.724047	-0.74802
1.469	-0.71404	-0.525725	-0.581304	-0.920764	-0.720984	-0.745189
1.47	-0.711613	-0.524338	-0.579077	-0.918114	-0.717698	-0.742491
1.471	-0.709189	-0.522663	-0.576758	-0.915518	-0.714407	-0.739923
1.472	-0.706816	-0.520832	-0.574366	-0.912812	-0.711368	-0.737455
1.473	-0.704547	-0.518858	-0.572016	-0.909954	-0.708725	-0.735084
1.474	-0.702476	-0.516676	-0.56983	-0.90692	-0.706391	-0.732782
1.475	-0.700725	-0.514364	-0.567911	-0.903739	-0.704224	-0.730418
1.476	-0.699325	-0.512118	-0.56631	-0.900546	-0.702173	-0.727894
1.477	-0.698105	-0.510069	-0.564961	-0.897389	-0.700209	-0.725233
1.478	-0.696888	-0.508242	-0.563717	-0.894199	-0.6983	-0.722534
1.479	-0.695666	-0.506608	-0.562513	-0.890937	-0.69642	-0.719951
1.48	-0.694415	-0.505132	-0.56135	-0.887656	-0.69454	-0.717655
1.481	-0.693009	-0.503774	-0.560155	-0.884467	-0.692699	-0.715662
1.482	-0.6914	-0.502504	-0.558763	-0.881443	-0.690998	-0.713769
1.483	-0.689583	-0.501339	-0.557128	-0.878624	-0.689488	-0.711766
1.484	-0.687508	-0.500254	-0.555454	-0.876039	-0.688137	-0.709614
1.485	-0.685182	-0.499163	-0.553943	-0.873645	-0.686852	-0.707402
1.486	-0.682706	-0.498081	-0.552584	-0.871358	-0.685513	-0.705235
1.487	-0.680172	-0.497114	-0.551271	-0.869066	-0.684053	-0.703141
1.488	-0.677612	-0.496239	-0.55002	-0.866659	-0.682409	-0.701068
1.489	-0.675077	-0.495254	-0.548989	-0.864122	-0.680515	-0.698928
1.49	-0.672677	-0.494029	-0.548279	-0.86152	-0.678435	-0.696602
1.491	-0.670546	-0.492655	-0.547765	-0.858895	-0.676262	-0.69402
1.492	-0.668785	-0.491256	-0.547204	-0.856225	-0.67399	-0.691332
1.493	-0.667369	-0.489836	-0.546467	-0.853438	-0.67163	-0.688833
1.494	-0.666125	-0.488356	-0.545582	-0.850498	-0.669204	-0.686741
1.495	-0.664811	-0.486776	-0.544601	-0.8475	-0.666658	-0.685107
1.496	-0.663314	-0.485046	-0.543528	-0.844624	-0.663957	-0.683805
1.497	-0.661716	-0.483225	-0.542357	-0.841969	-0.661146	-0.682598
1.498	-0.660153	-0.481467	-0.541127	-0.839456	-0.658268	-0.681368
1.499	-0.65871	-0.479812	-0.539876	-0.836911	-0.655352	-0.680129
1.5	-0.657424	-0.478116	-0.538541	-0.834164	-0.652471	-0.678868
1.501	-0.656342	-0.47622	-0.536991	-0.831083	-0.64969	-0.677594
1.502	-0.65546	-0.474161	-0.535237	-0.827664	-0.646983	-0.676412
1.503	-0.654581	-0.472069	-0.53352	-0.823986	-0.644363	-0.675248
1.504	-0.65347	-0.47001	-0.532007	-0.820136	-0.642012	-0.673849
1.505	-0.652088	-0.468168	-0.530528	-0.81627	-0.6401	-0.672158
1.506	-0.650515	-0.466807	-0.528911	-0.812562	-0.63864	-0.670281
1.507	-0.64878	-0.465962	-0.527308	-0.809182	-0.637561	-0.66824
1.508	-0.646844	-0.465476	-0.525961	-0.80633	-0.636712	-0.665913
1.509	-0.644661	-0.46523	-0.524853	-0.804101	-0.635911	-0.663169
1.51	-0.642243	-0.465148	-0.523798	-0.802373	-0.635073	-0.660072
1.511	-0.63974	-0.465094	-0.522742	-0.800895	-0.634194	-0.656866
1.512	-0.637382	-0.464904	-0.521782	-0.799426	-0.633226	-0.653772
1.513	-0.635399	-0.464548	-0.520903	-0.797857	-0.632091	-0.65089
1.514	-0.633875	-0.464081	-0.520008	-0.796261	-0.630761	-0.648221
1.515	-0.632644	-0.463458	-0.519087	-0.794776	-0.629149	-0.645704
1.516	-0.631487	-0.462623	-0.518163	-0.793424	-0.627135	-0.643336
1.517	-0.630318	-0.461563	-0.517274	-0.792074	-0.624776	-0.641199
1.518	-0.629055	-0.460174	-0.516492	-0.790529	-0.622251	-0.639347
1.519	-0.627587	-0.458391	-0.515853	-0.788682	-0.619672	-0.637796
1.52	-0.62583	-0.456379	-0.515219	-0.786563	-0.617091	-0.636569
1.521	-0.623717	-0.454353	-0.514251	-0.784251	-0.614549	-0.635576
1.522	-0.621306	-0.452375	-0.512711	-0.781805	-0.61206	-0.6346
1.523	-0.618852	-0.450421	-0.510727	-0.779254	-0.609663	-0.633505
1.524	-0.616642	-0.44853	-0.508623	-0.776635	-0.607473	-0.632303
1.525	-0.614811	-0.446803	-0.506598	-0.773992	-0.605551	-0.631062
1.526	-0.613318	-0.445279	-0.504706	-0.771286	-0.603808	-0.629806
1.527	-0.612072	-0.443979	-0.503054	-0.768374	-0.602125	-0.628417
1.528	-0.611001	-0.442985	-0.501818	-0.765169	-0.600448	-0.626758
1.529	-0.60999	-0.442224	-0.501069	-0.761792	-0.598776	-0.624859
1.53	-0.608907	-0.441458	-0.500697	-0.758481	-0.597093	-0.622852
1.531	-0.607683	-0.440585	-0.50047	-0.755334	-0.595329	-0.620829
1.532	-0.606333	-0.439637	-0.500147	-0.752288	-0.593426	-0.618845
1.533	-0.604858	-0.438652	-0.499568	-0.749313	-0.591437	-0.61698
1.534	-0.603201	-0.437715	-0.498687	-0.746489	-0.589479	-0.615253
1.535	-0.601375	-0.436868	-0.497541	-0.743871	-0.587628	-0.613618
1.536	-0.599512	-0.436034	-0.496185	-0.741387	-0.585911	-0.612013
1.537	-0.597745	-0.435094	-0.494664	-0.73894	-0.584317	-0.610334
1.538	-0.596116	-0.433961	-0.493045	-0.736539	-0.582839	-0.608436
1.539	-0.594506	-0.432607	-0.491322	-0.734231	-0.581469	-0.606221
1.54	-0.592738	-0.431032	-0.489394	-0.732044	-0.580212	-0.603723
1.541	-0.590847	-0.429313	-0.487273	-0.729918	-0.579117	-0.601092
1.542	-0.589066	-0.427719	-0.485173	-0.727705	-0.578201	-0.598477
1.543	-0.58758	-0.426566	-0.483423	-0.725358	-0.577434	-0.595986
1.544	-0.586377	-0.425899	-0.482241	-0.722909	-0.576728	-0.593728
1.545	-0.585332	-0.425591	-0.481511	-0.720415	-0.575917	-0.59179
1.546	-0.584408	-0.425634	-0.480973	-0.718017	-0.574882	-0.590135
1.547	-0.583634	-0.426018	-0.480465	-0.715797	-0.573666	-0.588643
1.548	-0.582948	-0.426531	-0.479901	-0.713698	-0.572444	-0.587283
1.549	-0.582251	-0.426919	-0.479243	-0.71164	-0.571368	-0.586117
1.55	-0.581481	-0.427089	-0.478405	-0.709599	-0.570456	-0.585175
1.551	-0.58059	-0.42701	-0.47721	-0.707593	-0.56961	-0.584364
1.552	-0.579567	-0.426592	-0.475614	-0.705709	-0.568705	-0.583492
1.553	-0.578488	-0.425882	-0.47381	-0.704078	-0.567662	-0.582421
1.554	-0.577355	-0.425161	-0.472024	-0.702742	-0.566491	-0.581076
1.555	-0.575942	-0.424666	-0.470302	-0.701628	-0.56526	-0.579376
1.556	-0.573992	-0.424303	-0.468564	-0.700661	-0.563954	-0.577301
1.557	-0.571503	-0.423809	-0.466793	-0.699732	-0.562492	-0.574969
1.558	-0.568743	-0.423046	-0.465093	-0.698654	-0.560883	-0.57257
1.559	-0.56605	-0.421985	-0.463614	-0.697267	-0.559158	-0.570237
1.56	-0.563594	-0.420632	-0.462421	-0.695542	-0.557274	-0.568026
1.561	-0.561355	-0.419042	-0.461426	-0.69355	-0.555207	-0.565934
1.562	-0.559359	-0.417328	-0.46054	-0.691436	-0.552942	-0.56393
1.563	-0.55773	-0.41561	-0.459817	-0.689371	-0.550473	-0.562096
1.564	-0.556514	-0.414001	-0.459371	-0.687402	-0.547869	-0.560584
1.565	-0.55562	-0.412674	-0.459245	-0.685461	-0.545168	-0.559338
1.566	-0.554921	-0.411793	-0.459328	-0.683555	-0.542313	-0.558167
1.567	-0.554315	-0.41132	-0.459378	-0.681731	-0.539345	-0.55695
1.568	-0.553618	-0.411027	-0.45913	-0.679938	-0.536518	-0.55563
1.569	-0.552643	-0.410682	-0.458431	-0.678064	-0.534036	-0.554201
1.57	-0.551415	-0.410123	-0.457308	-0.676079	-0.531904	-0.552747
1.571	-0.550051	-0.409243	-0.455877	-0.674044	-0.530056	-0.551404
1.572	-0.548582	-0.408019	-0.454193	-0.672034	-0.528432	-0.550245
1.573	-0.547025	-0.406551	-0.452242	-0.670096	-0.527061	-0.549216
1.574	-0.545439	-0.405004	-0.450154	-0.668222	-0.525995	-0.548114
1.575	-0.543829	-0.403515	-0.44826	-0.666345	-0.525161	-0.546721
1.576	-0.542132	-0.402154	-0.446839	-0.664394	-0.524415	-0.545015
1.577	-0.540264	-0.400936	-0.445943	-0.662344	-0.523635	-0.543102
1.578	-0.538193	-0.399915	-0.445445	-0.660247	-0.522779	-0.541116
1.579	-0.536066	-0.399201	-0.445152	-0.658179	-0.521895	-0.539279
1.58	-0.534186	-0.398811	-0.444858	-0.656211	-0.521055	-0.53778
1.581	-0.532749	-0.398633	-0.444375	-0.654424	-0.520284	-0.53666
1.582	-0.531739	-0.398542	-0.443611	-0.652812	-0.519488	-0.535889
1.583	-0.531111	-0.398441	-0.442529	-0.651254	-0.518504	-0.535391
1.584	-0.530821	-0.398322	-0.441095	-0.649681	-0.517245	-0.534965
1.585	-0.53076	-0.398293	-0.439375	-0.64814	-0.515675	-0.534357
1.586	-0.530803	-0.398371	-0.437487	-0.646653	-0.513757	-0.533403
1.587	-0.530757	-0.398337	-0.435494	-0.645219	-0.511583	-0.532066
1.588	-0.530391	-0.397955	-0.433522	-0.643856	-0.509373	-0.530406
1.589	-0.529672	-0.397218	-0.431859	-0.642525	-0.507201	-0.52854
1.59	-0.528717	-0.396265	-0.430769	-0.641096	-0.50497	-0.526627
1.591	-0.527576	-0.395208	-0.430334	-0.639424	-0.502735	-0.524829
1.592	-0.526321	-0.394114	-0.430515	-0.637522	-0.50071	-0.523199
1.593	-0.525118	-0.393012	-0.431179	-0.635574	-0.498947	-0.521661
1.594	-0.524039	-0.391924	-0.432081	-0.633687	-0.497297	-0.520159
1.595	-0.523041	-0.390817	-0.432972	-0.631761	-0.495677	-0.518711
1.596	-0.522118	-0.389526	-0.433694	-0.629655	-0.494166	-0.51729
1.597	-0.521186	-0.387998	-0.434126	-0.627353	-0.492853	-0.515814
1.598	-0.520008	-0.386451	-0.43412	-0.624956	-0.491745	-0.514286
1.599	-0.518463	-0.385137	-0.433539	-0.622601	-0.490777	-0.512791
1.6	-0.516678	-0.384163	-0.43238	-0.620379	-0.48983	-0.511347
1.601	-0.514888	-0.383554	-0.430814	-0.618348	-0.488852	-0.509838
1.602	-0.513296	-0.383267	-0.428995	-0.616582	-0.487909	-0.50811
1.603	-0.51193	-0.383159	-0.426957	-0.615109	-0.487026	-0.506105
1.604	-0.510681	-0.383074	-0.424734	-0.613849	-0.486072	-0.503912
1.605	-0.509463	-0.382922	-0.422375	-0.61268	-0.484879	-0.501772
1.606	-0.508241	-0.382672	-0.419921	-0.611549	-0.483446	-0.499924
1.607	-0.506939	-0.382332	-0.417418	-0.610439	-0.481924	-0.498416
1.608	-0.505462	-0.381851	-0.414882	-0.609322	-0.480511	-0.49714
1.609	-0.50378	-0.381109	-0.412315	-0.608228	-0.4794	-0.495962
1.61	-0.501918	-0.380142	-0.409763	-0.607208	-0.478645	-0.494768
1.611	-0.499976	-0.379174	-0.407281	-0.606213	-0.47815	-0.493537
1.612	-0.498146	-0.378346	-0.404922	-0.605133	-0.477827	-0.492326
1.613	-0.49663	-0.37761	-0.402806	-0.603917	-0.477534	-0.491095
1.614	-0.495487	-0.376876	-0.401096	-0.602647	-0.477006	-0.489742
1.615	-0.494542	-0.376144	-0.399885	-0.601485	-0.476134	-0.488332
1.616	-0.49357	-0.375441	-0.399201	-0.600474	-0.475023	-0.487027
1.617	-0.492517	-0.374717	-0.398995	-0.599432	-0.473739	-0.485787
1.618	-0.491449	-0.373904	-0.399082	-0.598174	-0.472263	-0.484433
1.619	-0.49039	-0.37303	-0.399266	-0.596752	-0.470586	-0.482945
1.62	-0.48929	-0.372119	-0.39945	-0.595288	-0.468795	-0.481355
1.621	-0.488132	-0.371144	-0.399577	-0.593755	-0.467041	-0.479589
1.622	-0.486951	-0.370122	-0.399512	-0.592072	-0.465367	-0.477726
1.623	-0.485755	-0.369028	-0.399075	-0.590226	-0.463697	-0.476062
1.624	-0.484655	-0.367668	-0.398272	-0.588219	-0.461959	-0.474753
1.625	-0.483867	-0.365941	-0.397357	-0.586032	-0.460173	-0.473667
1.626	-0.483486	-0.363972	-0.396556	-0.583727	-0.458473	-0.472615
1.627	-0.483405	-0.361943	-0.395938	-0.581482	-0.456963	-0.471518
1.628	-0.483405	-0.360054	-0.395577	-0.57947	-0.455645	-0.470403
1.629	-0.483345	-0.358446	-0.395563	-0.577758	-0.454531	-0.469323
1.63	-0.483179	-0.357116	-0.395827	-0.576288	-0.45359	-0.468236
1.631	-0.482786	-0.356021	-0.396155	-0.574934	-0.45273	-0.467028
1.632	-0.482061	-0.355164	-0.396361	-0.573636	-0.451926	-0.46561
1.633	-0.481045	-0.354544	-0.396445	-0.572389	-0.451134	-0.463964
1.634	-0.479828	-0.354107	-0.39651	-0.57113	-0.450226	-0.462178
1.635	-0.478442	-0.353726	-0.396542	-0.56974	-0.449065	-0.460434
1.636	-0.476944	-0.353282	-0.396411	-0.568177	-0.44753	-0.458902
1.637	-0.475467	-0.352715	-0.396047	-0.566581	-0.445573	-0.457616
1.638	-0.474027	-0.352033	-0.395478	-0.565102	-0.443279	-0.456526
1.639	-0.472454	-0.351369	-0.39478	-0.563639	-0.440891	-0.455549
1.64	-0.470651	-0.350849	-0.394069	-0.561983	-0.438687	-0.454601
1.641	-0.468748	-0.35038	-0.39339	-0.560106	-0.436776	-0.453696
1.642	-0.466936	-0.349797	-0.392585	-0.558144	-0.435127	-0.452891
1.643	-0.465279	-0.349144	-0.39143	-0.55624	-0.43369	-0.452101
1.644	-0.463784	-0.348559	-0.389825	-0.554449	-0.432452	-0.451207
1.645	-0.462539	-0.348052	-0.387915	-0.552758	-0.431476	-0.45024
1.646	-0.461647	-0.347639	-0.386032	-0.551148	-0.43081	-0.449311
1.647	-0.461094	-0.347396	-0.384439	-0.549605	-0.430356	-0.448478
1.648	-0.460752	-0.34722	-0.383145	-0.548066	-0.429983	-0.447711
1.649	-0.460457	-0.346784	-0.382018	-0.546453	-0.429717	-0.44697
1.65	-0.460003	-0.345848	-0.381046	-0.544746	-0.429619	-0.446251
1.651	-0.459205	-0.344434	-0.380363	-0.542976	-0.42958	-0.445547
1.652	-0.458061	-0.342734	-0.380016	-0.541242	-0.429476	-0.444813
1.653	-0.456747	-0.341015	-0.379958	-0.539667	-0.429344	-0.443962
1.654	-0.455498	-0.339504	-0.380141	-0.538254	-0.429254	-0.442902
1.655	-0.454486	-0.338322	-0.380456	-0.536923	-0.429165	-0.441624
1.656	-0.45369	-0.337477	-0.380779	-0.535628	-0.428976	-0.440287
1.657	-0.452919	-0.336842	-0.38104	-0.534328	-0.428679	-0.439093
1.658	-0.452037	-0.336208	-0.381204	-0.532942	-0.428361	-0.438064
1.659	-0.451048	-0.335433	-0.381203	-0.531409	-0.428027	-0.437102
1.66	-0.450051	-0.334514	-0.380934	-0.529812	-0.427545	-0.436123
1.661	-0.449182	-0.333487	-0.380369	-0.528374	-0.426891	-0.435008
1.662	-0.448551	-0.332459	-0.379562	-0.527263	-0.426257	-0.433714
1.663	-0.448178	-0.331659	-0.378582	-0.526519	-0.42579	-0.432405
1.664	-0.448056	-0.33123	-0.377452	-0.526162	-0.425394	-0.431274
1.665	-0.448119	-0.331096	-0.376143	-0.52618	-0.424848	-0.430359
1.666	-0.448113	-0.331136	-0.374725	-0.526491	-0.424052	-0.429607
1.667	-0.447809	-0.331292	-0.373371	-0.526988	-0.423088	-0.428955
1.668	-0.447199	-0.331435	-0.372153	-0.527502	-0.42203	-0.428335
1.669	-0.446337	-0.331321	-0.371083	-0.527757	-0.420899	-0.427734
1.67	-0.445233	-0.330793	-0.370194	-0.527511	-0.419763	-0.427188
1.671	-0.443816	-0.329878	-0.369474	-0.526679	-0.418699	-0.426628
1.672	-0.442003	-0.328701	-0.368867	-0.525306	-0.417699	-0.425939
1.673	-0.439852	-0.327421	-0.368242	-0.523495	-0.416667	-0.425125
1.674	-0.437501	-0.326228	-0.367386	-0.521417	-0.415497	-0.424251
1.675	-0.435063	-0.325282	-0.366198	-0.519287	-0.414189	-0.42333
1.676	-0.432656	-0.324554	-0.364792	-0.517273	-0.412855	-0.422315
1.677	-0.430417	-0.323919	-0.363364	-0.515473	-0.41157	-0.421194
1.678	-0.428492	-0.323362	-0.361989	-0.513911	-0.410335	-0.420061
1.679	-0.426998	-0.322902	-0.360545	-0.512549	-0.409127	-0.419016
1.68	-0.425973	-0.322504	-0.358916	-0.511338	-0.407874	-0.418032
1.681	-0.42544	-0.322167	-0.357168	-0.510215	-0.406492	-0.417013
1.682	-0.425386	-0.321873	-0.355449	-0.50915	-0.405044	-0.415903
1.683	-0.425655	-0.321534	-0.353903	-0.508151	-0.403729	-0.414711
1.684	-0.426013	-0.321072	-0.352659	-0.507127	-0.402656	-0.413466
1.685	-0.426216	-0.32044	-0.351793	-0.505911	-0.401829	-0.412191
1.686	-0.426043	-0.319554	-0.35133	-0.504428	-0.401295	-0.411006
1.687	-0.425325	-0.318381	-0.351245	-0.502775	-0.401099	-0.41006
1.688	-0.424024	-0.317034	-0.351493	-0.501151	-0.40118	-0.409362
1.689	-0.422315	-0.31568	-0.351897	-0.499653	-0.401405	-0.408795
1.69	-0.420512	-0.314449	-0.352073	-0.498208	-0.401669	-0.408233
1.691	-0.4189	-0.313451	-0.351753	-0.496703	-0.401968	-0.40756
1.692	-0.417638	-0.312753	-0.351176	-0.495113	-0.402279	-0.406647
1.693	-0.416719	-0.312357	-0.350845	-0.493486	-0.40242	-0.405465
1.694	-0.415995	-0.312244	-0.350925	-0.491862	-0.402193	-0.404114
1.695	-0.41531	-0.312386	-0.351211	-0.490272	-0.401551	-0.402653
1.696	-0.414582	-0.312704	-0.351473	-0.488778	-0.400543	-0.401074
1.697	-0.413773	-0.313075	-0.351565	-0.487476	-0.399229	-0.399439
1.698	-0.412948	-0.313401	-0.351378	-0.486433	-0.397739	-0.397931
1.699	-0.412316	-0.313567	-0.35081	-0.485614	-0.3963	-0.396739
1.7	-0.411938	-0.313374	-0.349836	-0.484905	-0.395064	-0.395928
1.701	-0.411503	-0.312687	-0.348516	-0.484194	-0.394007	-0.395481
1.702	-0.410649	-0.31157	-0.346932	-0.483417	-0.393028	-0.395415
1.703	-0.409301	-0.310214	-0.34525	-0.482589	-0.392064	-0.395712
1.704	-0.407585	-0.308831	-0.343638	-0.481715	-0.391034	-0.396136
1.705	-0.405698	-0.307587	-0.342044	-0.480712	-0.38987	-0.396402
1.706	-0.403852	-0.306507	-0.340288	-0.47954	-0.388609	-0.39641
1.707	-0.402233	-0.305526	-0.33835	-0.478258	-0.387295	-0.396131
1.708	-0.400979	-0.304604	-0.336386	-0.476963	-0.385942	-0.395543
1.709	-0.400139	-0.303769	-0.334545	-0.475707	-0.384574	-0.394708
1.71	-0.399612	-0.303076	-0.332893	-0.474402	-0.383199	-0.393725
1.711	-0.399211	-0.302517	-0.331463	-0.472901	-0.381855	-0.392696
1.712	-0.398804	-0.301989	-0.330323	-0.471129	-0.380588	-0.391698
1.713	-0.398312	-0.301438	-0.329549	-0.469199	-0.379359	-0.390776
1.714	-0.397673	-0.30097	-0.329143	-0.467343	-0.378116	-0.390022
1.715	-0.396887	-0.300652	-0.328991	-0.465693	-0.376861	-0.389521
1.716	-0.396004	-0.300438	-0.328946	-0.464282	-0.375663	-0.389188
1.717	-0.395047	-0.300277	-0.328923	-0.463122	-0.374576	-0.388857
1.718	-0.393902	-0.30006	-0.328892	-0.462215	-0.373568	-0.388395
1.719	-0.39246	-0.299597	-0.328905	-0.461585	-0.372605	-0.387707
1.72	-0.390766	-0.298814	-0.32903	-0.461222	-0.371675	-0.386757
1.721	-0.388969	-0.297901	-0.329242	-0.460992	-0.370758	-0.385549
1.722	-0.387275	-0.29715	-0.329436	-0.460755	-0.369839	-0.38417
1.723	-0.385979	-0.296731	-0.329565	-0.4605	-0.368866	-0.382815
1.724	-0.385306	-0.296664	-0.329681	-0.46023	-0.367788	-0.381647
1.725	-0.385235	-0.296828	-0.329829	-0.459825	-0.366623	-0.380719
1.726	-0.385621	-0.296982	-0.330061	-0.459165	-0.365432	-0.380016
1.727	-0.386363	-0.296943	-0.330479	-0.458257	-0.364236	-0.379447
1.728	-0.387385	-0.296794	-0.331091	-0.457156	-0.362992	-0.37888
1.729	-0.388623	-0.296673	-0.331759	-0.455876	-0.361703	-0.378286
1.73	-0.389992	-0.296398	-0.332312	-0.454409	-0.360462	-0.377737
1.731	-0.391345	-0.295661	-0.332642	-0.452779	-0.35928	-0.377231
1.732	-0.392498	-0.294442	-0.332661	-0.451115	-0.35808	-0.376634
1.733	-0.39328	-0.29302	-0.332273	-0.449569	-0.356824	-0.37583
1.734	-0.393594	-0.291759	-0.331451	-0.448223	-0.355483	-0.374824
1.735	-0.393421	-0.290912	-0.330321	-0.447115	-0.354029	-0.373658
1.736	-0.392831	-0.290481	-0.328977	-0.446173	-0.352466	-0.372353
1.737	-0.392016	-0.290311	-0.327363	-0.445266	-0.350884	-0.370945
1.738	-0.39119	-0.290316	-0.325475	-0.44437	-0.349468	-0.369504
1.739	-0.39043	-0.290506	-0.323512	-0.443499	-0.348339	-0.368143
1.74	-0.389705	-0.290842	-0.321698	-0.442603	-0.347488	-0.366972
1.741	-0.388954	-0.291172	-0.320141	-0.441618	-0.346887	-0.366009
1.742	-0.388098	-0.291296	-0.318925	-0.440529	-0.34657	-0.365197
1.743	-0.387064	-0.291106	-0.318147	-0.439386	-0.346519	-0.364515
1.744	-0.385859	-0.290574	-0.31786	-0.438227	-0.346627	-0.363967
1.745	-0.384587	-0.289683	-0.318067	-0.437032	-0.34684	-0.363514
1.746	-0.383404	-0.288527	-0.31869	-0.435744	-0.347075	-0.363104
1.747	-0.382435	-0.287316	-0.319533	-0.434332	-0.347164	-0.36262
1.748	-0.381746	-0.286166	-0.320333	-0.432865	-0.347022	-0.361917
1.749	-0.38135	-0.285098	-0.32086	-0.431462	-0.346649	-0.361013
1.75	-0.381219	-0.284188	-0.321035	-0.430174	-0.346073	-0.360038
1.751	-0.381276	-0.283504	-0.320961	-0.429027	-0.345324	-0.35911
1.752	-0.38144	-0.282994	-0.320823	-0.428083	-0.344383	-0.358316
1.753	-0.381614	-0.282554	-0.320728	-0.427303	-0.343224	-0.357648
1.754	-0.381633	-0.282156	-0.320626	-0.426526	-0.341905	-0.357009
1.755	-0.381347	-0.281827	-0.32032	-0.425636	-0.340567	-0.356353
1.756	-0.380753	-0.281559	-0.319673	-0.424648	-0.339386	-0.355733
1.757	-0.379968	-0.281295	-0.318745	-0.4237	-0.338536	-0.35515
1.758	-0.379069	-0.281005	-0.317668	-0.422926	-0.33812	-0.354487
1.759	-0.378044	-0.280745	-0.316503	-0.422356	-0.33808	-0.353689
1.76	-0.376973	-0.280581	-0.315298	-0.421967	-0.338192	-0.352809
1.761	-0.376075	-0.280452	-0.314142	-0.421668	-0.338235	-0.351891
1.762	-0.375469	-0.280175	-0.313113	-0.42131	-0.338179	-0.35097
1.763	-0.375042	-0.279648	-0.312231	-0.420778	-0.338125	-0.350091
1.764	-0.374583	-0.278977	-0.3114	-0.420105	-0.338095	-0.349295
1.765	-0.373975	-0.278239	-0.310476	-0.419433	-0.338071	-0.348594
1.766	-0.373261	-0.277342	-0.309388	-0.418812	-0.338054	-0.347956
1.767	-0.372532	-0.276181	-0.308184	-0.418183	-0.337983	-0.34736
1.768	-0.371818	-0.274716	-0.307056	-0.417524	-0.337763	-0.346828
1.769	-0.371016	-0.273036	-0.306235	-0.416857	-0.337386	-0.34641
1.77	-0.369985	-0.271414	-0.305798	-0.416143	-0.33691	-0.346081
1.771	-0.36878	-0.270154	-0.305653	-0.415326	-0.336308	-0.345678
1.772	-0.367599	-0.26938	-0.305644	-0.414417	-0.335468	-0.345056
1.773	-0.366554	-0.269045	-0.305641	-0.413424	-0.334332	-0.344278
1.774	-0.365612	-0.269045	-0.305625	-0.412342	-0.33296	-0.343503
1.775	-0.364624	-0.26927	-0.305682	-0.411166	-0.331587	-0.342778
1.776	-0.363579	-0.269658	-0.305859	-0.409888	-0.330462	-0.342028
1.777	-0.362732	-0.270145	-0.306152	-0.40855	-0.329647	-0.341185
1.778	-0.362291	-0.270511	-0.306593	-0.407186	-0.329094	-0.340232
1.779	-0.36226	-0.270546	-0.307179	-0.40581	-0.328735	-0.339201
1.78	-0.362553	-0.270253	-0.307766	-0.404538	-0.328468	-0.338176
1.781	-0.363057	-0.269732	-0.308251	-0.403543	-0.328171	-0.337208
1.782	-0.363649	-0.269153	-0.308663	-0.402911	-0.327752	-0.336299
1.783	-0.364166	-0.268728	-0.309026	-0.402545	-0.32722	-0.335457
1.784	-0.364467	-0.268498	-0.309318	-0.402234	-0.326612	-0.334735
1.785	-0.364443	-0.268345	-0.309513	-0.40188	-0.325912	-0.334233
1.786	-0.363941	-0.268222	-0.309528	-0.401541	-0.325112	-0.334039
1.787	-0.362893	-0.26818	-0.309199	-0.401227	-0.324178	-0.334116
1.788	-0.361411	-0.268114	-0.308403	-0.400838	-0.323013	-0.334235
1.789	-0.359627	-0.267785	-0.307243	-0.400258	-0.321533	-0.334087
1.79	-0.357622	-0.267132	-0.305933	-0.399368	-0.319712	-0.33346
1.791	-0.355571	-0.266341	-0.304545	-0.398039	-0.317575	-0.332291
1.792	-0.353747	-0.265567	-0.303009	-0.396257	-0.315269	-0.330714
1.793	-0.352351	-0.264759	-0.301304	-0.394193	-0.313048	-0.328977
1.794	-0.351456	-0.263811	-0.299579	-0.392057	-0.31114	-0.327286
1.795	-0.351064	-0.262744	-0.298027	-0.390032	-0.309606	-0.325795
1.796	-0.351077	-0.261665	-0.296708	-0.388318	-0.30835	-0.324623
1.797	-0.351281	-0.260651	-0.295564	-0.387001	-0.307268	-0.323798
1.798	-0.351418	-0.259742	-0.294487	-0.385961	-0.306349	-0.32328
1.799	-0.351284	-0.258964	-0.293433	-0.385096	-0.305549	-0.322957
1.8	-0.35081	-0.258222	-0.292466	-0.384501	-0.304733	-0.322648
1.801	-0.350104	-0.257305	-0.291565	-0.384292	-0.303872	-0.32221
1.802	-0.349328	-0.25614	-0.290604	-0.384443	-0.303058	-0.321592
1.803	-0.348516	-0.254875	-0.28953	-0.38477	-0.30226	-0.320826
1.804	-0.347586	-0.253653	-0.288392	-0.385048	-0.301363	-0.320016
1.805	-0.346461	-0.252496	-0.287241	-0.385197	-0.3004	-0.319219
1.806	-0.345138	-0.251465	-0.286079	-0.385191	-0.299557	-0.318361
1.807	-0.343702	-0.250672	-0.284938	-0.385059	-0.298992	-0.317271
1.808	-0.342283	-0.250146	-0.283971	-0.384937	-0.298773	-0.31583
1.809	-0.340982	-0.249822	-0.283304	-0.384906	-0.298887	-0.314101
1.81	-0.33984	-0.249587	-0.282875	-0.384886	-0.299249	-0.312238
1.811	-0.338941	-0.249397	-0.28261	-0.384739	-0.299819	-0.310376
1.812	-0.338485	-0.249385	-0.282566	-0.384432	-0.300589	-0.308643
1.813	-0.338602	-0.249672	-0.282791	-0.384001	-0.301423	-0.307197
1.814	-0.339166	-0.250179	-0.283189	-0.383452	-0.302163	-0.306172
1.815	-0.339917	-0.250728	-0.283582	-0.38283	-0.302771	-0.30558
1.816	-0.340591	-0.251197	-0.2839	-0.382176	-0.303285	-0.305365
1.817	-0.340926	-0.25157	-0.284182	-0.381459	-0.303706	-0.305474
1.818	-0.340742	-0.251853	-0.284413	-0.38062	-0.30391	-0.305797
1.819	-0.340037	-0.251971	-0.284523	-0.379618	-0.303814	-0.306224
1.82	-0.338971	-0.25181	-0.284521	-0.37849	-0.303491	-0.306726
1.821	-0.337745	-0.251352	-0.284413	-0.377357	-0.302999	-0.307273
1.822	-0.336561	-0.250677	-0.284115	-0.376385	-0.302362	-0.307709
1.823	-0.335602	-0.249826	-0.283575	-0.37565	-0.301672	-0.30786
1.824	-0.334927	-0.248727	-0.28288	-0.375004	-0.301008	-0.307753
1.825	-0.33447	-0.24743	-0.282242	-0.374278	-0.300325	-0.30748
1.826	-0.334121	-0.246237	-0.281838	-0.373444	-0.299551	-0.306968
1.827	-0.333763	-0.245454	-0.281628	-0.372495	-0.298688	-0.306119
1.828	-0.333336	-0.245223	-0.281421	-0.371434	-0.297725	-0.304996
1.829	-0.332836	-0.24549	-0.281122	-0.370363	-0.296615	-0.303826
1.83	-0.332241	-0.246076	-0.280846	-0.369409	-0.295386	-0.302867
1.831	-0.33151	-0.246829	-0.280804	-0.36864	-0.29416	-0.302275
1.832	-0.330735	-0.247651	-0.281085	-0.368095	-0.293069	-0.302101
1.833	-0.330174	-0.24835	-0.281542	-0.367744	-0.292201	-0.302313
1.834	-0.329956	-0.24864	-0.281932	-0.36747	-0.291556	-0.302822
1.835	-0.329921	-0.248454	-0.282099	-0.36717	-0.291082	-0.303518
1.836	-0.32984	-0.247979	-0.281975	-0.366781	-0.290747	-0.304278
1.837	-0.32959	-0.247341	-0.281438	-0.366306	-0.290602	-0.304957
1.838	-0.329097	-0.246552	-0.280319	-0.365802	-0.290748	-0.305393
1.839	-0.328426	-0.245682	-0.278672	-0.365223	-0.291215	-0.305453
1.84	-0.327777	-0.244876	-0.276858	-0.364474	-0.291923	-0.305062
1.841	-0.327181	-0.244286	-0.275246	-0.363526	-0.292815	-0.30428
1.842	-0.32654	-0.244006	-0.273997	-0.362412	-0.293869	-0.303324
1.843	-0.325863	-0.244012	-0.273138	-0.361179	-0.294944	-0.302408
1.844	-0.325264	-0.244216	-0.272652	-0.35985	-0.295855	-0.301666
1.845	-0.324852	-0.244581	-0.272547	-0.358472	-0.296575	-0.301178
1.846	-0.324669	-0.245152	-0.272799	-0.357154	-0.297127	-0.300919
1.847	-0.324737	-0.245987	-0.273242	-0.355988	-0.297417	-0.300686
1.848	-0.325075	-0.24709	-0.273665	-0.355031	-0.297289	-0.300267
1.849	-0.325584	-0.248381	-0.273867	-0.354338	-0.296695	-0.299661
1.85	-0.326047	-0.249632	-0.273685	-0.353887	-0.295702	-0.298951
1.851	-0.326333	-0.25048	-0.273128	-0.353528	-0.294366	-0.298194
1.852	-0.326366	-0.25066	-0.272351	-0.353118	-0.292727	-0.297384
1.853	-0.325956	-0.250212	-0.271538	-0.352642	-0.290932	-0.296359
1.854	-0.325015	-0.249331	-0.270811	-0.352113	-0.289196	-0.294926
1.855	-0.323779	-0.248188	-0.270122	-0.351488	-0.287681	-0.293117
1.856	-0.322591	-0.246928	-0.26936	-0.350776	-0.286523	-0.291154
1.857	-0.321674	-0.245567	-0.268557	-0.350042	-0.285776	-0.289217
1.858	-0.321097	-0.244062	-0.267902	-0.349344	-0.285332	-0.287341
1.859	-0.320827	-0.242555	-0.267574	-0.348741	-0.28505	-0.285529
1.86	-0.320795	-0.241253	-0.267579	-0.348304	-0.284859	-0.283824
1.861	-0.320856	-0.24021	-0.267806	-0.348046	-0.284725	-0.282222
1.862	-0.320814	-0.239299	-0.268222	-0.347927	-0.284639	-0.280668
1.863	-0.320569	-0.238281	-0.268839	-0.347901	-0.284573	-0.279149
1.864	-0.320124	-0.237048	-0.269524	-0.34789	-0.284364	-0.277774
1.865	-0.319442	-0.235752	-0.269981	-0.347771	-0.283751	-0.276721
1.866	-0.318487	-0.234598	-0.269946	-0.347488	-0.282577	-0.276124
1.867	-0.317419	-0.233723	-0.269304	-0.347058	-0.280903	-0.276003
1.868	-0.316466	-0.233107	-0.268129	-0.346478	-0.278926	-0.276187
1.869	-0.315666	-0.23261	-0.266759	-0.345792	-0.27685	-0.276478
1.87	-0.314954	-0.232167	-0.265676	-0.345099	-0.274817	-0.276871
1.871	-0.314204	-0.231726	-0.26519	-0.344473	-0.272898	-0.277454
1.872	-0.313217	-0.23121	-0.265248	-0.343944	-0.271125	-0.278247
1.873	-0.311957	-0.230708	-0.265604	-0.343532	-0.26959	-0.27925
1.874	-0.3106	-0.230397	-0.266107	-0.343254	-0.268406	-0.280438
1.875	-0.309339	-0.230289	-0.266654	-0.343072	-0.267527	-0.281679
1.876	-0.308244	-0.230258	-0.267015	-0.342869	-0.266802	-0.282821
1.877	-0.307259	-0.230244	-0.267038	-0.342518	-0.266238	-0.283794
1.878	-0.306318	-0.230318	-0.266823	-0.341993	-0.265971	-0.284541
1.879	-0.305407	-0.230505	-0.2665	-0.341398	-0.266083	-0.285028
1.88	-0.304614	-0.230741	-0.266132	-0.340834	-0.266492	-0.285299
1.881	-0.304145	-0.231044	-0.265815	-0.340307	-0.26701	-0.285417
1.882	-0.30406	-0.231453	-0.26557	-0.339802	-0.267538	-0.285418
1.883	-0.304138	-0.231887	-0.265235	-0.339292	-0.26813	-0.285274
1.884	-0.304129	-0.232225	-0.264555	-0.338732	-0.26884	-0.284849
1.885	-0.303932	-0.232342	-0.263403	-0.33806	-0.26963	-0.283986
1.886	-0.30352	-0.232144	-0.261898	-0.337206	-0.270451	-0.282631
1.887	-0.302926	-0.23163	-0.260219	-0.336172	-0.271302	-0.280914
1.888	-0.302362	-0.23083	-0.258458	-0.335157	-0.27213	-0.279058
1.889	-0.302069	-0.229791	-0.256733	-0.334403	-0.272838	-0.277196
1.89	-0.302044	-0.228618	-0.255198	-0.33393	-0.273384	-0.275409
1.891	-0.302181	-0.22745	-0.254022	-0.333583	-0.273647	-0.273868
1.892	-0.302458	-0.22645	-0.253372	-0.333213	-0.273445	-0.272758
1.893	-0.302829	-0.225781	-0.253347	-0.332728	-0.27283	-0.272169
1.894	-0.303183	-0.225478	-0.253931	-0.332153	-0.272026	-0.272108
1.895	-0.303451	-0.225377	-0.254988	-0.331601	-0.271191	-0.272479
1.896	-0.303657	-0.225294	-0.256278	-0.331163	-0.270423	-0.27305
1.897	-0.303829	-0.225102	-0.257509	-0.330881	-0.269764	-0.273601
1.898	-0.303896	-0.224758	-0.258418	-0.33069	-0.269122	-0.274003
1.899	-0.303732	-0.224371	-0.258874	-0.330508	-0.26831	-0.274174
1.9	-0.303225	-0.224097	-0.258944	-0.330353	-0.267226	-0.274089
1.901	-0.302326	-0.224083	-0.258785	-0.330277	-0.266024	-0.2738
1.902	-0.301143	-0.22441	-0.258513	-0.330267	-0.265005	-0.273375
1.903	-0.299856	-0.224967	-0.258205	-0.330216	-0.264311	-0.272861
1.904	-0.298525	-0.225542	-0.257929	-0.330022	-0.26396	-0.272282
1.905	-0.29716	-0.225982	-0.257823	-0.329718	-0.263971	-0.271534
1.906	-0.295794	-0.226205	-0.258058	-0.329375	-0.264246	-0.270448
1.907	-0.29441	-0.226196	-0.258595	-0.328998	-0.264601	-0.269077
1.908	-0.293005	-0.225978	-0.25918	-0.328501	-0.264954	-0.267618
1.909	-0.291677	-0.225633	-0.259659	-0.327728	-0.26525	-0.266199
1.91	-0.290565	-0.225305	-0.260062	-0.326594	-0.265387	-0.264947
1.911	-0.28971	-0.225097	-0.260432	-0.325215	-0.265334	-0.263949
1.912	-0.289003	-0.225008	-0.260767	-0.323831	-0.265068	-0.263201
1.913	-0.288301	-0.224961	-0.261073	-0.322625	-0.264505	-0.262697
1.914	-0.287569	-0.224893	-0.261424	-0.321644	-0.263697	-0.262408
1.915	-0.286838	-0.224813	-0.261915	-0.320833	-0.262879	-0.262302
1.916	-0.286155	-0.224758	-0.262496	-0.32016	-0.262222	-0.262455
1.917	-0.2855	-0.224718	-0.262965	-0.319676	-0.261785	-0.262923
1.918	-0.284768	-0.224662	-0.263139	-0.31936	-0.261608	-0.263578
1.919	-0.283949	-0.224519	-0.262925	-0.319106	-0.261669	-0.264242
1.92	-0.283171	-0.224148	-0.262277	-0.318869	-0.261847	-0.264846
1.921	-0.282486	-0.223455	-0.261143	-0.318628	-0.261977	-0.265326
1.922	-0.281788	-0.222488	-0.259468	-0.318312	-0.261927	-0.265533
1.923	-0.281015	-0.22139	-0.257341	-0.317809	-0.261674	-0.265282
1.924	-0.280225	-0.220414	-0.255032	-0.31705	-0.261302	-0.264521
1.925	-0.27945	-0.219837	-0.252831	-0.316167	-0.260928	-0.263452
1.926	-0.27873	-0.219788	-0.250957	-0.315462	-0.260623	-0.262449
1.927	-0.278142	-0.220195	-0.249579	-0.315121	-0.260413	-0.261846
1.928	-0.277704	-0.220847	-0.248793	-0.315026	-0.260306	-0.261645
1.929	-0.277433	-0.221571	-0.248554	-0.314941	-0.260254	-0.261594
1.93	-0.277429	-0.222345	-0.248711	-0.314756	-0.260135	-0.261453
1.931	-0.277759	-0.223162	-0.249081	-0.314467	-0.259823	-0.261088
1.932	-0.278332	-0.223901	-0.249428	-0.314084	-0.259339	-0.260499
1.933	-0.278962	-0.224389	-0.249469	-0.313636	-0.258828	-0.25976
1.934	-0.279527	-0.224547	-0.248961	-0.313148	-0.258339	-0.258926
1.935	-0.27999	-0.224408	-0.247882	-0.312578	-0.25777	-0.258065
1.936	-0.280292	-0.223993	-0.246461	-0.311837	-0.257027	-0.257304
1.937	-0.280319	-0.223348	-0.245003	-0.310914	-0.255995	-0.256769
1.938	-0.280007	-0.222613	-0.243733	-0.309823	-0.254584	-0.256439
1.939	-0.279525	-0.221893	-0.242741	-0.308527	-0.252923	-0.256122
1.94	-0.279216	-0.221229	-0.241978	-0.307054	-0.251238	-0.255676
1.941	-0.27922	-0.220667	-0.241347	-0.305559	-0.249657	-0.255182
1.942	-0.279318	-0.220178	-0.240808	-0.304225	-0.24829	-0.254779
1.943	-0.279228	-0.21967	-0.240375	-0.303184	-0.247231	-0.254434
1.944	-0.278978	-0.219158	-0.240046	-0.302455	-0.246451	-0.254046
1.945	-0.278843	-0.218761	-0.239769	-0.301985	-0.245841	-0.25362
1.946	-0.278986	-0.218538	-0.239531	-0.301726	-0.245338	-0.253184
1.947	-0.27931	-0.218463	-0.239486	-0.301629	-0.244969	-0.252731
1.948	-0.279565	-0.218491	-0.239783	-0.301636	-0.244766	-0.252298
1.949	-0.279643	-0.218504	-0.24027	-0.301702	-0.244654	-0.251927
1.95	-0.279664	-0.218347	-0.240638	-0.301886	-0.244515	-0.251611
1.951	-0.279651	-0.218044	-0.24076	-0.302274	-0.244324	-0.251336
1.952	-0.27944	-0.21775	-0.240617	-0.302814	-0.244099	-0.251108
1.953	-0.278965	-0.217525	-0.240189	-0.303323	-0.243869	-0.250881
1.954	-0.278296	-0.217297	-0.2396	-0.303588	-0.243659	-0.250561
1.955	-0.277412	-0.217	-0.239046	-0.303466	-0.243401	-0.250052
1.956	-0.276256	-0.216585	-0.238616	-0.302929	-0.243008	-0.249352
1.957	-0.274934	-0.215957	-0.238373	-0.302032	-0.242517	-0.24866
1.958	-0.273681	-0.215022	-0.238425	-0.300907	-0.242031	-0.248181
1.959	-0.272729	-0.213824	-0.238745	-0.299722	-0.241604	-0.247878
1.96	-0.272161	-0.212563	-0.239126	-0.29852	-0.241241	-0.247608
1.961	-0.271937	-0.211402	-0.239361	-0.297221	-0.240905	-0.24734
1.962	-0.27199	-0.210379	-0.239437	-0.295818	-0.240611	-0.247124
1.963	-0.272146	-0.2095	-0.239564	-0.294462	-0.240453	-0.246983
1.964	-0.272163	-0.208755	-0.239899	-0.293354	-0.240507	-0.246901
1.965	-0.271918	-0.208152	-0.240368	-0.292586	-0.240742	-0.246856
1.966	-0.271454	-0.207794	-0.240769	-0.29213	-0.24104	-0.246825
1.967	-0.270904	-0.207786	-0.240915	-0.291951	-0.241269	-0.246795
1.968	-0.27034	-0.208053	-0.240746	-0.292043	-0.241371	-0.246792
1.969	-0.269685	-0.208414	-0.240359	-0.292391	-0.2414	-0.246811
1.97	-0.268809	-0.208829	-0.239881	-0.292914	-0.241434	-0.246771
1.971	-0.267659	-0.209366	-0.239333	-0.293469	-0.2415	-0.246594
1.972	-0.266306	-0.209942	-0.238678	-0.293951	-0.2416	-0.246275
1.973	-0.264911	-0.210292	-0.237991	-0.294297	-0.241764	-0.245824
1.974	-0.263646	-0.21019	-0.237387	-0.29443	-0.242021	-0.245233
1.975	-0.262619	-0.209605	-0.236808	-0.294312	-0.242343	-0.244484
1.976	-0.26183	-0.208705	-0.23618	-0.294034	-0.242674	-0.243496
1.977	-0.261241	-0.207675	-0.235626	-0.293739	-0.242989	-0.242244
1.978	-0.260842	-0.206607	-0.235289	-0.293382	-0.24331	-0.241005
1.979	-0.26062	-0.205546	-0.235171	-0.29276	-0.243625	-0.240127
1.98	-0.260584	-0.204512	-0.23523	-0.291749	-0.243856	-0.239669
1.981	-0.26084	-0.203549	-0.235415	-0.290307	-0.243886	-0.239446
1.982	-0.261566	-0.20276	-0.235623	-0.288509	-0.243617	-0.239215
1.983	-0.262755	-0.20219	-0.235709	-0.286643	-0.243061	-0.238879
1.984	-0.264067	-0.201823	-0.235547	-0.285052	-0.242284	-0.238549
1.985	-0.265115	-0.201645	-0.235147	-0.283906	-0.241298	-0.238349
1.986	-0.265686	-0.201587	-0.234615	-0.283188	-0.240062	-0.238175
1.987	-0.265693	-0.201526	-0.234013	-0.282754	-0.238611	-0.237804
1.988	-0.265244	-0.201375	-0.233317	-0.282438	-0.237122	-0.237198
1.989	-0.26459	-0.201072	-0.23249	-0.282128	-0.235771	-0.23656
1.99	-0.263931	-0.200593	-0.231506	-0.2817	-0.234553	-0.236057
1.991	-0.263415	-0.200024	-0.230272	-0.281029	-0.233351	-0.235668
1.992	-0.263056	-0.199461	-0.228751	-0.280099	-0.232146	-0.235317
1.993	-0.262714	-0.198875	-0.227103	-0.279028	-0.23102	-0.235032
1.994	-0.262343	-0.198257	-0.22553	-0.278039	-0.230038	-0.234894
1.995	-0.261987	-0.197723	-0.224099	-0.277298	-0.229244	-0.234975
1.996	-0.261605	-0.197363	-0.222742	-0.276743	-0.228695	-0.235265
1.997	-0.261113	-0.197098	-0.221425	-0.276218	-0.22838	-0.235598
1.998	-0.26049	-0.196739	-0.220241	-0.275719	-0.228227	-0.235769
[truncated: 1,001 more rows]

## Sheet: WT_pH6.9_surfer_traces
time (s)	current (nA)
0	5.53969e-05	1.47829e-05	-4.79842e-05	0.000114472	0.000118164	0.000118164
0.001	0.000342029	4.62294e-05	-0.000206167	0.000729654	0.00073842	0.00073842
0.002	0.00107075	-7.28149e-06	-0.000393089	0.00230902	0.00228579	0.00230794
0.003	0.00231052	-0.000308955	-0.000501805	0.00505814	0.00487357	0.00501478
0.004	0.00395239	-0.000919952	-0.000586812	0.00892035	0.00830644	0.00870601
0.005	0.0058055	-0.00175788	-0.000730024	0.0136702	0.0123054	0.0129343
0.006	0.0076378	-0.00269934	-0.00098601	0.018947	0.0166306	0.0171952
0.007	0.00924922	-0.00363551	-0.00142913	0.0243357	0.0209915	0.0211652
0.008	0.0105405	-0.00439519	-0.00209299	0.0294092	0.0250799	0.0246524
0.009	0.011472	-0.00479748	-0.00295401	0.0337838	0.0287325	0.0275612
0.01	0.0120717	-0.0048071	-0.00388295	0.0372148	0.0318219	0.0299398
0.011	0.0124555	-0.00448017	-0.00464745	0.0396308	0.0341221	0.0318746
0.012	0.0127458	-0.00391424	-0.00510984	0.0411633	0.0354921	0.0333968
0.013	0.012914	-0.00327303	-0.00529333	0.0420912	0.0360353	0.0345435
0.014	0.0128097	-0.0026428	-0.00523255	0.04266	0.0359721	0.0354027
0.015	0.0124364	-0.0019423	-0.0048584	0.0429836	0.0355142	0.0361028
0.016	0.0120142	-0.00110599	-0.00408535	0.043093	0.0348636	0.0367284
0.017	0.011736	-0.000166243	-0.00306143	0.0430456	0.0341838	0.0372315
0.018	0.0116395	0.000931053	-0.00211494	0.042876	0.0335962	0.0375471
0.019	0.0117596	0.00227878	-0.0013767	0.0424639	0.0332037	0.0376844
0.02	0.0121788	0.00376168	-0.000724438	0.0416955	0.0330546	0.0376432
0.021	0.0128392	0.00507011	-3.75512e-05	0.0406128	0.0331491	0.0374191
0.022	0.0134999	0.00595129	0.000705378	0.0393317	0.0334672	0.03708
0.023	0.0138917	0.0063965	0.00149835	0.038044	0.0339236	0.0367002
0.024	0.0138543	0.00657136	0.00236474	0.0369896	0.0344252	0.0362451
0.025	0.0133868	0.00668133	0.00329069	0.0363002	0.0349752	0.0356466
0.026	0.0125689	0.00687514	0.00410271	0.0359499	0.035552	0.0349534
0.027	0.0114498	0.00719397	0.0045278	0.0358025	0.0360571	0.0343349
0.028	0.0100967	0.0076429	0.0044224	0.0357283	0.036473	0.0339481
0.029	0.00867078	0.00823358	0.00390222	0.0357313	0.0368223	0.0338174
0.03	0.00737096	0.00898004	0.00325924	0.0358844	0.0370145	0.0339095
0.031	0.00639004	0.00987357	0.0027726	0.0362065	0.0369369	0.0342409
0.032	0.0058842	0.01081	0.00254041	0.0366587	0.0366268	0.0347179
0.033	0.00589529	0.0115991	0.00253427	0.0371739	0.0362349	0.0350936
0.034	0.00630921	0.0120604	0.00285273	0.0376813	0.0358579	0.0352528
0.035	0.0068758	0.0120977	0.00364847	0.0380843	0.0355205	0.0352444
0.036	0.00728425	0.0117496	0.00485718	0.0382442	0.0352497	0.0351064
0.037	0.00732935	0.0111557	0.00622433	0.0381012	0.0350126	0.0348868
0.038	0.00706059	0.0104555	0.0074913	0.0377232	0.0347338	0.0347198
0.039	0.00666362	0.00978722	0.00856736	0.0371941	0.0344589	0.034751
0.04	0.0063154	0.0093056	0.00950104	0.0365912	0.0343142	0.0349934
0.041	0.00618912	0.00910858	0.0102972	0.0360128	0.0343784	0.035372
0.042	0.00632779	0.00920337	0.0108626	0.0355286	0.0346417	0.0358677
0.043	0.00655659	0.00952646	0.0110843	0.0351706	0.0349587	0.0364763
0.044	0.00663584	0.00996884	0.0109766	0.0350136	0.0351712	0.0370886
0.045	0.00648955	0.0104388	0.0107087	0.035144	0.0352853	0.0375175
0.046	0.00626246	0.0109025	0.0104313	0.0355329	0.0353849	0.0376596
0.047	0.00604406	0.0113246	0.0101994	0.0360323	0.0354629	0.0375951
0.048	0.00573078	0.0116267	0.0100966	0.0364818	0.0354757	0.0374661
0.049	0.00525802	0.0117283	0.0102228	0.036829	0.0354346	0.0373008
0.05	0.00466818	0.0115633	0.0105307	0.0371444	0.0353686	0.0370528
0.051	0.00406128	0.0111584	0.0109008	0.0375545	0.0352647	0.0367179
0.052	0.0036029	0.0107356	0.0112784	0.0381119	0.0350904	0.0363542
0.053	0.00343451	0.0105472	0.0116172	0.0386382	0.0349415	0.0360527
0.054	0.00362944	0.0106042	0.0118494	0.0389012	0.0349946	0.0358346
0.055	0.00413259	0.0107081	0.011959	0.038888	0.0353299	0.0356387
0.056	0.00472483	0.0106228	0.0119846	0.0387328	0.0359519	0.0354191
0.057	0.00518628	0.0101579	0.0119095	0.0385443	0.0368132	0.0351153
0.058	0.00538842	0.00931081	0.0116331	0.0383487	0.0378035	0.0346656
0.059	0.00528575	0.0083324	0.0110505	0.0381654	0.0388124	0.0341522
0.06	0.00493446	0.00756626	0.0101052	0.0380812	0.0397334	0.0338127
0.061	0.00441347	0.00722503	0.00888607	0.0381418	0.0403893	0.0337619
0.062	0.00373698	0.00729122	0.007727	0.0382733	0.0406179	0.033794
0.063	0.00287532	0.00756617	0.00697584	0.0383645	0.0404109	0.0336917
0.064	0.00181337	0.00777675	0.00664349	0.0383486	0.0398718	0.0335334
0.065	0.000583595	0.00772973	0.00644332	0.0382343	0.0391352	0.0335603
0.066	-0.000782496	0.0073618	0.00610996	0.0380496	0.0383419	0.0338751
0.067	-0.00227348	0.00668	0.0056165	0.0377789	0.0376487	0.0343314
0.068	-0.00381711	0.00569079	0.00508872	0.0374057	0.0372224	0.0347661
0.069	-0.00531728	0.00435122	0.00457349	0.0369292	0.0371593	0.0351815
0.07	-0.0067567	0.0026872	0.00391769	0.0363701	0.0373963	0.0356268
0.071	-0.00811208	0.000879735	0.00287464	0.0357895	0.0377397	0.0360884
0.072	-0.00925859	-0.000873004	0.001323	0.0352729	0.0379864	0.03652
0.073	-0.0100465	-0.00246924	-0.000656652	0.0349027	0.03801	0.0368764
0.074	-0.0103671	-0.00386843	-0.00287722	0.0346892	0.0377468	0.0371131
0.075	-0.0100594	-0.00503575	-0.0051589	0.0346182	0.0371782	0.0372395
0.076	-0.00887474	-0.00594579	-0.00729687	0.0347457	0.0363891	0.0373166
0.077	-0.00677484	-0.00660967	-0.00900797	0.0350939	0.0355689	0.0373818
0.078	-0.00414768	-0.00706956	-0.0100893	0.0355372	0.0348932	0.0374736
0.079	-0.00147937	-0.00740167	-0.0105627	0.0358491	0.03447	0.0376399
0.08	0.00102589	-0.00770774	-0.0105959	0.0358455	0.0343216	0.0378702
0.081	0.00337101	-0.0080088	-0.0103809	0.0354713	0.0343043	0.0380969
0.082	0.00548414	-0.00819157	-0.0100251	0.0348259	0.0342137	0.0382203
0.083	0.00716903	-0.0082075	-0.00953897	0.034176	0.0339936	0.0381614
0.084	0.00832146	-0.00816362	-0.00899393	0.0337237	0.03374	0.0379188
0.085	0.00904548	-0.00804475	-0.00852974	0.0334385	0.0335366	0.0375556
0.086	0.00952604	-0.00767106	-0.0081911	0.0332328	0.0333336	0.037152
0.087	0.00984628	-0.00701573	-0.00792256	0.0330688	0.0330462	0.0367433
0.088	0.00992803	-0.00620256	-0.00772094	0.0329431	0.0326512	0.0363513
0.089	0.00970456	-0.00517878	-0.00769467	0.032896	0.0321488	0.0360533
0.09	0.00933806	-0.00373955	-0.00794116	0.0330205	0.0315726	0.0359253
0.091	0.00910877	-0.00188	-0.00844761	0.0333882	0.0309933	0.0359436
0.092	0.00908245	0.00015501	-0.00914937	0.0339146	0.0305068	0.036031
0.093	0.0090089	0.00208312	-0.00996942	0.0344178	0.0302365	0.0361462
0.094	0.00864491	0.00375703	-0.0107543	0.034763	0.0302402	0.0362277
0.095	0.00807112	0.00520828	-0.0113314	0.0348694	0.0303933	0.0362047
0.096	0.00742741	0.00650539	-0.0117341	0.0347461	0.0304877	0.0361169
0.097	0.00655779	0.00767186	-0.0121977	0.0345129	0.030437	0.0360738
0.098	0.00520095	0.00869964	-0.012758	0.0342353	0.0302417	0.0361064
0.099	0.0033187	0.00947227	-0.013183	0.0338535	0.0298522	0.0361907
0.1	0.00109748	0.00978179	-0.013387	0.0333734	0.0292183	0.03632
0.101	-0.00126633	0.00958019	-0.0134641	0.0329258	0.0284274	0.0364222
0.102	-0.00360527	0.00907056	-0.0135202	0.0325606	0.0277538	0.0364384
0.103	-0.00571292	0.00839954	-0.0136686	0.0321945	0.027502	0.0364628
0.104	-0.00741744	0.00750154	-0.0139204	0.0318251	0.0277054	0.0365735
0.105	-0.00858316	0.00634509	-0.0142027	0.0315486	0.0280869	0.0366794
0.106	-0.00913177	0.00505999	-0.0144957	0.0313586	0.0283591	0.0366679
0.107	-0.00920656	0.00380309	-0.0148173	0.0311779	0.0284846	0.0365391
0.108	-0.00910466	0.002661	-0.015166	0.0310162	0.0286485	0.0363083
0.109	-0.00903617	0.00165023	-0.0154737	0.0309909	0.0289701	0.0359105
0.11	-0.00908045	0.00078895	-0.0156287	0.0312018	0.0293696	0.0352579
0.111	-0.00923026	0.000164213	-0.0155813	0.0315842	0.0296849	0.0343311
0.112	-0.00942343	-0.000158153	-0.015337	0.0320014	0.0297418	0.0332741
0.113	-0.00963502	-0.000301938	-0.01492	0.0324182	0.0294404	0.0323461
0.114	-0.00995884	-0.000497742	-0.0144461	0.0328392	0.0288196	0.0317148
0.115	-0.0105071	-0.000827172	-0.0140806	0.0331904	0.0280389	0.0314035
0.116	-0.0112448	-0.00127108	-0.0138906	0.0334075	0.0273411	0.0313445
0.117	-0.0120553	-0.00183046	-0.0139219	0.0335509	0.0269229	0.0314653
0.118	-0.0128517	-0.00242195	-0.014331	0.033648	0.0268426	0.0317705
0.119	-0.0135674	-0.00293883	-0.0151443	0.0336362	0.027036	0.0322564
0.12	-0.014106	-0.00344054	-0.0161068	0.0335564	0.0273867	0.0328228
0.121	-0.0143241	-0.00408943	-0.0170368	0.0334706	0.0278443	0.0333036
0.122	-0.0140838	-0.00499606	-0.017946	0.0333522	0.0284305	0.0335851
0.123	-0.0133092	-0.00617828	-0.0188258	0.0331643	0.0291595	0.0336898
0.124	-0.0120459	-0.00756994	-0.0196666	0.0328495	0.0300172	0.0336807
0.125	-0.0104282	-0.00906427	-0.0205264	0.0324459	0.0309331	0.0335514
0.126	-0.00851699	-0.0105486	-0.0214726	0.0321169	0.0317853	0.0332994
0.127	-0.00630649	-0.0118228	-0.0225002	0.0318955	0.0325051	0.0330453
0.128	-0.00395179	-0.0124949	-0.02352	0.0316604	0.0331235	0.0329518
0.129	-0.00178663	-0.0121672	-0.024462	0.0313657	0.0337155	0.0330711
0.13	-7.97251e-05	-0.0107963	-0.0253181	0.0310866	0.034259	0.033337
0.131	0.00108878	-0.00878613	-0.0259947	0.030897	0.0345962	0.0335552
0.132	0.00175126	-0.00673933	-0.0262102	0.0308287	0.0346812	0.0334576
0.133	0.00194086	-0.00508792	-0.0256692	0.0308726	0.0346399	0.0329502
0.134	0.00169026	-0.00398772	-0.0243509	0.0309894	0.0345315	0.0322344
0.135	0.00109307	-0.00349867	-0.022557	0.031116	0.0342957	0.0316174
0.136	0.000270736	-0.0036481	-0.020609	0.0311298	0.0338527	0.0312743
0.137	-0.000603625	-0.00433516	-0.0186369	0.0309581	0.0332021	0.0312032
0.138	-0.00130724	-0.00534027	-0.0167477	0.0306726	0.0324532	0.03132
0.139	-0.00175782	-0.00652842	-0.0151676	0.0303666	0.0317206	0.031526
0.14	-0.00197585	-0.00789368	-0.0141227	0.0301512	0.031032	0.0317075
0.141	-0.00192099	-0.00935525	-0.0137519	0.030167	0.0303642	0.031748
0.142	-0.00157291	-0.0107789	-0.014091	0.0303982	0.0297804	0.03157
0.143	-0.00099054	-0.012058	-0.0149928	0.0306801	0.0293902	0.0312215
0.144	-0.000257699	-0.0129891	-0.0161789	0.0309081	0.0291611	0.0308365
0.145	0.000503121	-0.0133265	-0.0174907	0.0310616	0.0290334	0.030478
0.146	0.00111303	-0.0129862	-0.0189404	0.0311216	0.0290571	0.0302471
0.147	0.0014609	-0.012078	-0.0204343	0.0310852	0.029282	0.0303297
0.148	0.00164776	-0.0107541	-0.0216863	0.0309649	0.029743	0.0307251
0.149	0.00187029	-0.00907905	-0.0224517	0.0307261	0.0304235	0.0312709
0.15	0.0021087	-0.00717319	-0.0226335	0.0303385	0.0311659	0.0318552
0.151	0.00211219	-0.00534948	-0.0222544	0.0298816	0.0318424	0.0323996
0.152	0.00170137	-0.0039053	-0.0214442	0.0294509	0.0324667	0.0328958
0.153	0.000905223	-0.00288152	-0.0203931	0.0290075	0.0330461	0.033423
0.154	-7.22675e-05	-0.0021119	-0.0193625	0.0284838	0.0335624	0.0339589
0.155	-0.000920393	-0.0014731	-0.0186383	0.0279811	0.0340281	0.03436
0.156	-0.00138299	-0.00100373	-0.0183443	0.0276953	0.0344719	0.0344923
0.157	-0.00140562	-0.000741937	-0.0184545	0.0277003	0.0349165	0.0342437
0.158	-0.00114733	-0.000593794	-0.018902	0.027952	0.0353007	0.0335602
0.159	-0.000876891	-0.000423596	-0.0194806	0.0284174	0.0355247	0.0325353
0.16	-0.000730456	-0.000162366	-0.0199425	0.0290725	0.0356073	0.0313958
0.161	-0.000527154	0.00015658	-0.0202608	0.0298194	0.0356014	0.0303743
0.162	-1.6982e-05	0.000452341	-0.0205251	0.0304695	0.0354106	0.0296872
0.163	0.00076174	0.000718755	-0.0207587	0.0308537	0.0349429	0.0295462
0.164	0.00159037	0.00101309	-0.0209577	0.0309644	0.0343893	0.0299861
0.165	0.00237095	0.00135892	-0.0210834	0.030891	0.0340719	0.030804
0.166	0.00313941	0.00178336	-0.0209705	0.0306892	0.0340855	0.0316927
0.167	0.00397255	0.0023321	-0.020448	0.0304141	0.0342918	0.0324109
0.168	0.00490902	0.00296305	-0.019599	0.0301373	0.0345238	0.0329212
0.169	0.00588576	0.00363917	-0.0186868	0.029944	0.0346429	0.03329
0.17	0.00685221	0.00447408	-0.0178513	0.0299135	0.0345623	0.033545
0.171	0.00783062	0.00552806	-0.0170877	0.0299893	0.0343714	0.0337359
0.172	0.00887496	0.00659832	-0.0163937	0.0300363	0.0342295	0.0339489
0.173	0.010051	0.00741333	-0.0158194	0.0300302	0.0340593	0.0341702
0.174	0.0113488	0.00791429	-0.0154292	0.0299797	0.0336206	0.0342533
0.175	0.0126795	0.00825199	-0.0152082	0.0298229	0.0328431	0.034089
0.176	0.01392	0.00862055	-0.015094	0.0295561	0.0318711	0.0337079
0.177	0.0149107	0.00908099	-0.0151081	0.0292349	0.03093	0.0332089
0.178	0.015592	0.00951721	-0.0153255	0.0288596	0.0301906	0.0326608
0.179	0.0160728	0.00979779	-0.0156725	0.0284353	0.0296375	0.0320642
0.18	0.0164008	0.00984516	-0.0158591	0.028029	0.0291509	0.0314545
0.181	0.0164559	0.00958558	-0.0156855	0.0277315	0.0286506	0.0309663
0.182	0.0161134	0.0089977	-0.0152162	0.0275721	0.0281186	0.0306808
0.183	0.0153171	0.00810218	-0.0145362	0.0274224	0.0276025	0.0305393
0.184	0.0141017	0.00686888	-0.0136463	0.0270979	0.0271597	0.030487
0.185	0.0126295	0.00523403	-0.012618	0.0265983	0.026832	0.030617
0.186	0.011089	0.00318559	-0.0116647	0.0260801	0.0266745	0.0310359
0.187	0.00959558	0.000835169	-0.010997	0.0256192	0.0267379	0.031634
0.188	0.00823547	-0.00157405	-0.0106928	0.0251629	0.0270878	0.0321964
0.189	0.00714923	-0.0037861	-0.0107773	0.0246376	0.0277607	0.032597
0.19	0.00646269	-0.00565117	-0.0112394	0.0240553	0.0286465	0.0327923
0.191	0.00616426	-0.00705616	-0.0119226	0.0235469	0.0295489	0.032834
0.192	0.00619128	-0.00790017	-0.012606	0.0232356	0.0303513	0.0328172
0.193	0.00658037	-0.0082151	-0.0131782	0.0231232	0.0310161	0.0327715
0.194	0.00736335	-0.00809302	-0.0136186	0.0231238	0.0315006	0.0326694
0.195	0.00830867	-0.00758559	-0.0139496	0.0231321	0.0317544	0.0324989
0.196	0.00909057	-0.00679136	-0.0142234	0.0230945	0.0317356	0.0323148
0.197	0.00970945	-0.00586788	-0.0144287	0.0230856	0.031455	0.0322226
0.198	0.0103208	-0.00491193	-0.0145157	0.0232448	0.0310121	0.0323049
0.199	0.0108799	-0.00398679	-0.0145237	0.0236124	0.0305141	0.032573
0.2	0.0112239	-0.00325051	-0.0144804	0.0240959	0.0299668	0.0329943
0.201	0.0112023	-0.00288586	-0.0142754	0.0245675	0.029304	0.0335171
0.202	0.0107111	-0.00300382	-0.0139025	0.0249719	0.0285584	0.0340552
0.203	0.00972895	-0.00361784	-0.0135594	0.0253496	0.0279345	0.0344851
0.204	0.00831491	-0.00461701	-0.0133664	0.0257503	0.0277055	0.0347496
0.205	0.00662104	-0.00586727	-0.013283	0.0261658	0.0280795	0.0349748
0.206	0.00485689	-0.00728612	-0.0132307	0.0265468	0.0290034	0.0352756
0.207	0.00320649	-0.00877036	-0.0131646	0.0268336	0.0301577	0.03553
0.208	0.00182763	-0.0101591	-0.0130311	0.0269596	0.0313036	0.0355701
0.209	0.000862371	-0.0112957	-0.0127287	0.0268713	0.0323883	0.0353861
0.21	0.000386182	-0.0121192	-0.0122667	0.0266304	0.0333261	0.0350553
0.211	0.000336327	-0.0126794	-0.0117597	0.0264322	0.0339697	0.034698
0.212	0.000475428	-0.0130179	-0.011183	0.026424	0.0342732	0.0344565
0.213	0.000489721	-0.0130681	-0.0104024	0.026618	0.0343465	0.0343559
0.214	0.000177065	-0.0126882	-0.00939563	0.0269705	0.0343405	0.0343043
0.215	-0.00045601	-0.011818	-0.00822692	0.0273882	0.034313	0.0342621
0.216	-0.00125955	-0.0105595	-0.00697194	0.0277106	0.0342761	0.0342634
0.217	-0.00204938	-0.00894908	-0.00583354	0.0278428	0.0343123	0.0343019
0.218	-0.00272583	-0.00693191	-0.00505955	0.0278605	0.0345027	0.0343131
0.219	-0.00330929	-0.00466909	-0.00471743	0.027852	0.0348395	0.0342549
0.22	-0.00376164	-0.00240207	-0.00472633	0.0278164	0.035265	0.0341415
0.221	-0.00391468	-0.000153668	-0.00492187	0.0277689	0.0356752	0.0340274
0.222	-0.00363082	0.00211034	-0.00508351	0.0277349	0.0359591	0.0339481
0.223	-0.0029097	0.00426126	-0.0051095	0.0277343	0.0361385	0.0338383
0.224	-0.00188956	0.00614801	-0.00507416	0.0278323	0.0363528	0.0336443
0.225	-0.0007522	0.00782973	-0.00514055	0.0280813	0.0366851	0.0334675
0.226	0.000455759	0.00946316	-0.00549836	0.0284719	0.0370895	0.0334008
0.227	0.0018123	0.0110819	-0.00617138	0.0289673	0.0374968	0.0333621
0.228	0.00325575	0.0125759	-0.00694804	0.0295519	0.0378785	0.0332052
0.229	0.00454195	0.0137691	-0.00760255	0.030188	0.0381848	0.0329198
0.23	0.00559146	0.0145697	-0.00801978	0.0307933	0.0383736	0.032698
0.231	0.00661693	0.0150038	-0.0081349	0.0313511	0.0384894	0.0327381
0.232	0.00772577	0.0151283	-0.00787398	0.0318717	0.0385964	0.0330136
0.233	0.00874248	0.0151046	-0.00720638	0.0322836	0.038657	0.0333355
0.234	0.0095293	0.0152386	-0.00615658	0.0324613	0.0385419	0.0335268
0.235	0.010022	0.0157755	-0.00476546	0.0323176	0.0381717	0.0334585
0.236	0.0100669	0.0167499	-0.00317365	0.0319082	0.0375579	0.0331318
0.237	0.00963419	0.0179726	-0.00160116	0.0313411	0.0367356	0.0327743
0.238	0.00896705	0.0190822	-0.000213671	0.0306567	0.0357667	0.0326341
0.239	0.0083416	0.019728	0.000911878	0.0299559	0.0347191	0.0327468
0.24	0.00786934	0.0197229	0.00182869	0.0294145	0.0336749	0.0330801
0.241	0.00750022	0.0190959	0.00274918	0.0291355	0.0327383	0.0336346
0.242	0.00710993	0.0179868	0.00390483	0.0291224	0.0319353	0.0343385
0.243	0.00668118	0.0164607	0.00535662	0.0293197	0.0312322	0.0350174
0.244	0.00631219	0.0146108	0.00703388	0.0296537	0.0306138	0.0354332
0.245	0.00599296	0.012695	0.00893681	0.0300628	0.0300788	0.0355219
0.246	0.00561916	0.0109703	0.0111165	0.0305424	0.0296239	0.0355058
0.247	0.00518085	0.00953222	0.0135123	0.031114	0.0292508	0.0355951
0.248	0.00478391	0.00840429	0.0160183	0.0316968	0.0289839	0.035771
0.249	0.0045289	0.00764232	0.018568	0.0321663	0.0288316	0.0358635
0.25	0.00437119	0.00728501	0.0209429	0.0324939	0.0287683	0.035847
0.251	0.00418898	0.00733991	0.0227625	0.0326871	0.0288138	0.0359293
0.252	0.0039582	0.00778372	0.0238313	0.0327227	0.0289521	0.036232
0.253	0.00372225	0.00844167	0.0242177	0.0325978	0.0290296	0.0366831
0.254	0.00349563	0.00898094	0.0240557	0.0323207	0.0289526	0.0371992
0.255	0.00327527	0.00922057	0.0234428	0.0319227	0.0287935	0.0377336
0.256	0.00306382	0.00934648	0.0223987	0.0315271	0.0287015	0.0382207
0.257	0.00286637	0.00962876	0.0209682	0.0312529	0.0287714	0.0385802
0.258	0.00268096	0.0100728	0.019338	0.031094	0.0289415	0.0387965
0.259	0.00257196	0.0104683	0.0177127	0.0309987	0.0291245	0.0389608
0.26	0.00267664	0.0106861	0.0162419	0.0310142	0.0293088	0.0391393
0.261	0.00297772	0.010824	0.0150554	0.0312611	0.0294798	0.0392321
0.262	0.00327009	0.0110266	0.0141929	0.0317371	0.0295872	0.0390846
0.263	0.00340579	0.011265	0.0135671	0.0322514	0.0296103	0.0386283
0.264	0.00336469	0.0114102	0.0130439	0.0325377	0.0296558	0.0378863
0.265	0.00319038	0.0113732	0.0125355	0.032423	0.0298688	0.0370078
0.266	0.0030499	0.0110692	0.0120234	0.0319828	0.0302511	0.0362181
0.267	0.00316745	0.0104852	0.011536	0.0314367	0.0307385	0.0356765
0.268	0.0035251	0.00971716	0.0111555	0.0309583	0.0313382	0.035399
0.269	0.00379576	0.00878489	0.0110012	0.0306528	0.0320467	0.0352505
0.27	0.00365577	0.00765043	0.011143	0.0305268	0.0328092	0.0350934
0.271	0.00305059	0.00640619	0.0115932	0.0304924	0.0336048	0.0349037
0.272	0.0020907	0.00517454	0.0123323	0.0304801	0.0344325	0.0346625
0.273	0.000834798	0.00395143	0.0132495	0.0305463	0.0352722	0.0343096
0.274	-0.000687002	0.00274347	0.0141298	0.0308086	0.0360845	0.0337957
0.275	-0.00235802	0.00168352	0.0147437	0.0312528	0.0368002	0.0330837
0.276	-0.00394287	0.000972416	0.0149982	0.0317404	0.0373494	0.0321565
0.277	-0.0051767	0.000756654	0.0149711	0.032188	0.0376786	0.0310667
0.278	-0.00597424	0.00100071	0.0147389	0.0325905	0.0377816	0.0299595
0.279	-0.0064338	0.00150728	0.014342	0.0329273	0.0377458	0.0289697
0.28	-0.00656138	0.00206519	0.0139588	0.0331736	0.0377074	0.028143
0.281	-0.00621365	0.00250897	0.0138243	0.0333559	0.0377401	0.0275194
0.282	-0.0052868	0.00264124	0.0139555	0.0335444	0.0377659	0.0271883
0.283	-0.00377714	0.00234419	0.0141417	0.0338416	0.0376178	0.027258
0.284	-0.00186643	0.00179344	0.0142073	0.0343208	0.0372119	0.0278191
0.285	0.000143191	0.00131031	0.0142325	0.0349117	0.0366029	0.0288515
0.286	0.00217873	0.00115647	0.0144162	0.0355112	0.0358579	0.0302091
0.287	0.00439064	0.00149679	0.0148273	0.0361453	0.0349447	0.0317056
0.288	0.00690207	0.0023371	0.0153925	0.0368861	0.0338753	0.0331258
0.289	0.00973532	0.00361209	0.015998	0.0378142	0.0327795	0.0342882
0.29	0.0127674	0.00537977	0.0166082	0.0390623	0.0316925	0.0351777
0.291	0.0158578	0.0078959	0.0172816	0.0407583	0.030561	0.0359024
0.292	0.0193138	0.0115324	0.018151	0.0429331	0.0294297	0.0364807
0.293	0.02434	0.0167725	0.0195835	0.0456028	0.0284036	0.0368328
0.294	0.0329992	0.0245361	0.0223892	0.0490461	0.0275634	0.0369534
0.295	0.0477107	0.0364393	0.0279008	0.0539545	0.0269683	0.0369159
0.296	0.0708164	0.0546679	0.0379854	0.0612412	0.026638	0.0367707
0.297	0.104155	0.0814321	0.0548575	0.071641	0.0265734	0.0365476
0.298	0.148369	0.118156	0.0804753	0.0854971	0.0268368	0.0363371
0.299	0.202575	0.165018	0.115884	0.102766	0.0275179	0.0361871
0.3	0.264734	0.220873	0.160953	0.122937	0.0286627	0.036
0.301	0.33234	0.283403	0.21436	0.145065	0.0302876	0.0357187
0.302	0.403224	0.349742	0.273794	0.168098	0.0323951	0.0354388
0.303	0.476474	0.417471	0.336631	0.19123	0.034976	0.0353248
0.304	0.553277	0.485644	0.400762	0.214119	0.0379977	0.0355109
0.305	0.636902	0.555344	0.465301	0.236977	0.0415091	0.0360495
0.306	0.731751	0.6295	0.531168	0.260633	0.0458503	0.0369012
0.307	0.842326	0.71234	0.60113	0.286628	0.0515804	0.0378981
0.308	0.972179	0.808593	0.679149	0.31711	0.0592382	0.038827
0.309	1.12297	0.922345	0.769481	0.354335	0.069308	0.0396654
0.31	1.29417	1.05597	0.875703	0.400026	0.0821718	0.0406045
0.311	1.48325	1.20975	0.999886	0.454883	0.0978566	0.0419103
0.312	1.68592	1.38213	1.14239	0.518506	0.115884	0.0440321
0.313	1.89651	1.56985	1.30214	0.589631	0.135376	0.0476701
0.314	2.10841	1.76784	1.47669	0.666432	0.155287	0.0535358
0.315	2.31461	1.96955	1.662	0.746837	0.174623	0.0621623
0.316	2.50831	2.16765	1.85244	0.828789	0.19265	0.0738406
0.317	2.68356	2.35487	2.04137	0.910296	0.209262	0.0884868
0.318	2.83583	2.52473	2.22193	0.989492	0.225256	0.105497
0.319	2.96232	2.67219	2.38763	1.06474	0.242204	0.123849
0.32	3.06179	2.79402	2.53294	1.1347	0.262138	0.142453
0.321	3.1341	2.88892	2.65415	1.19844	0.287188	0.160481
0.322	3.1798	2.95688	2.74962	1.25529	0.319162	0.177446
0.323	3.19992	2.99866	2.81951	1.30482	0.359189	0.193277
0.324	3.19573	3.01539	2.86514	1.34675	0.40746	0.208592
0.325	3.16817	3.00819	2.88828	1.38092	0.463178	0.224795
0.326	3.11717	2.97742	2.89056	1.40717	0.524869	0.243892
0.327	3.04072	2.92165	2.87279	1.42519	0.590722	0.268159
0.328	2.934	2.83647	2.83397	1.43432	0.658795	0.29958
0.329	2.78925	2.71399	2.76987	1.43285	0.727132	0.339298
0.33	2.59736	2.54392	2.67244	1.41757	0.793835	0.38749
0.331	2.35134	2.31681	2.53102	1.38384	0.857308	0.44357
0.332	2.04989	2.02787	2.33556	1.32669	0.916486	0.506311
0.333	1.69931	1.67976	2.08056	1.24264	0.970739	0.573829
0.334	1.3131	1.28356	1.76807	1.13113	1.01979	0.643814
0.335	0.90983	0.857393	1.40854	0.994963	1.06367	0.713889
0.336	0.509947	0.423494	1.01917	0.840072	1.10243	0.781826
0.337	0.132523	0.00416159	0.620667	0.674485	1.13587	0.84575
0.338	-0.207454	-0.381928	0.233326	0.506842	1.16343	0.904408
0.339	-0.501182	-0.722124	-0.126148	0.345031	1.18414	0.95723
0.34	-0.746998	-1.01092	-0.44666	0.195071	1.19634	1.00422
0.341	-0.949709	-1.24996	-0.724035	0.0604415	1.19711	1.04583
0.342	-1.11855	-1.44651	-0.960924	-0.0580509	1.18203	1.08278
0.343	-1.26453	-1.6108	-1.16492	-0.161845	1.14589	1.11587
0.344	-1.39789	-1.7532	-1.34592	-0.25382	1.0844	1.14569
0.345	-1.52599	-1.88172	-1.51328	-0.337282	0.995812	1.17223
0.346	-1.65204	-2.00036	-1.67336	-0.414854	0.881771	1.19432
0.347	-1.77494	-2.10864	-1.82818	-0.48772	0.74725	1.20887
0.348	-1.8901	-2.20269	-1.97534	-0.555508	0.599768	1.21061
0.349	-1.9909	-2.2769	-2.10904	-0.616775	0.448047	1.19317
0.35	-2.07014	-2.32541	-2.22174	-0.66963	0.30045	1.15094
0.351	-2.12145	-2.34333	-2.3059	-0.712054	0.163586	1.08098
0.352	-2.14043	-2.32741	-2.35517	-0.742204	0.0414919	0.984003
0.353	-2.12504	-2.27664	-2.36541	-0.758809	-0.0645588	0.864496
0.354	-2.07569	-2.19258	-2.33524	-0.761402	-0.15577	0.729811
0.355	-1.99507	-2.07919	-2.26613	-0.750488	-0.235119	0.588567
0.356	-1.88782	-1.94213	-2.16229	-0.727564	-0.306376	0.449071
0.357	-1.75998	-1.78805	-2.03	-0.694797	-0.373041	0.318115
0.358	-1.61821	-1.6239	-1.8767	-0.654656	-0.437361	0.200243
0.359	-1.46903	-1.45644	-1.71021	-0.60963	-0.499859	0.0974371
0.36	-1.31846	-1.2918	-1.53817	-0.562032	-0.559527	0.00920261
0.361	-1.17166	-1.13496	-1.36744	-0.513938	-0.614252	-0.0669717
0.362	-1.03287	-0.989689	-1.20367	-0.467203	-0.661307	-0.134896
0.363	-0.905404	-0.858578	-1.05119	-0.423389	-0.69796	-0.198785
0.364	-0.791435	-0.743114	-0.913034	-0.383576	-0.72206	-0.262259
0.365	-0.692041	-0.643803	-0.790982	-0.348303	-0.732446	-0.327502
0.366	-0.607266	-0.560373	-0.685701	-0.317725	-0.729098	-0.394895
0.367	-0.536275	-0.491878	-0.596821	-0.291783	-0.713002	-0.463062
0.368	-0.477683	-0.43678	-0.523292	-0.27026	-0.685871	-0.52925
0.369	-0.429908	-0.393174	-0.463651	-0.252852	-0.64992	-0.59005
0.37	-0.391322	-0.35905	-0.41597	-0.239157	-0.607704	-0.642114
0.371	-0.360364	-0.332405	-0.378026	-0.228576	-0.561815	-0.682583
0.372	-0.335532	-0.311371	-0.347811	-0.220352	-0.514634	-0.709374
0.373	-0.315232	-0.294427	-0.323746	-0.213731	-0.468282	-0.721482
0.374	-0.297921	-0.28031	-0.30443	-0.208161	-0.42447	-0.719143
0.375	-0.282453	-0.267897	-0.288464	-0.203361	-0.38431	-0.703662
0.376	-0.268016	-0.25631	-0.274649	-0.199138	-0.348473	-0.67711
0.377	-0.253943	-0.244978	-0.262153	-0.195261	-0.31743	-0.642003
0.378	-0.239854	-0.233581	-0.250415	-0.191521	-0.291336	-0.600964
0.379	-0.225802	-0.221965	-0.238992	-0.187805	-0.269974	-0.556481
0.38	-0.212067	-0.210108	-0.227537	-0.184137	-0.252918	-0.510771
0.381	-0.198904	-0.198128	-0.215863	-0.180559	-0.239613	-0.465736
0.382	-0.186422	-0.186301	-0.203921	-0.17698	-0.229412	-0.422958
0.383	-0.174603	-0.174961	-0.191626	-0.173275	-0.221663	-0.383639
0.384	-0.163461	-0.164347	-0.178928	-0.169424	-0.215746	-0.348557
0.385	-0.15316	-0.15457	-0.166082	-0.165511	-0.211074	-0.318063
0.386	-0.143898	-0.145628	-0.153604	-0.161674	-0.207135	-0.292237
0.387	-0.135782	-0.137473	-0.141967	-0.157963	-0.203523	-0.271008
0.388	-0.128787	-0.13013	-0.131447	-0.154278	-0.19993	-0.254125
0.389	-0.122772	-0.123665	-0.12213	-0.150434	-0.196156	-0.241061
0.39	-0.117563	-0.118094	-0.113952	-0.146304	-0.192103	-0.231027
0.391	-0.113028	-0.113333	-0.10687	-0.141963	-0.187769	-0.223258
0.392	-0.109105	-0.109155	-0.100968	-0.137561	-0.183242	-0.217201
0.393	-0.105714	-0.105217	-0.0962598	-0.133189	-0.178563	-0.212388
0.394	-0.10258	-0.101271	-0.0925909	-0.128896	-0.173728	-0.208377
0.395	-0.0994146	-0.0973014	-0.0897388	-0.124669	-0.168821	-0.204789
0.396	-0.0961514	-0.0934377	-0.0874637	-0.120456	-0.163974	-0.201315
0.397	-0.0928301	-0.0897863	-0.0855428	-0.116341	-0.159254	-0.197694
0.398	-0.0895232	-0.086375	-0.0838175	-0.11253	-0.154718	-0.193638
0.399	-0.0864033	-0.0832358	-0.0822391	-0.109157	-0.150423	-0.188964
0.4	-0.0837161	-0.0803961	-0.0808798	-0.106234	-0.146394	-0.183773
0.401	-0.0816186	-0.0778699	-0.0797762	-0.103662	-0.142591	-0.178345
0.402	-0.0800861	-0.0757957	-0.0787729	-0.101299	-0.138901	-0.172917
0.403	-0.079061	-0.0743301	-0.0776455	-0.0990996	-0.135222	-0.167602
0.404	-0.0784531	-0.0733978	-0.0763396	-0.097094	-0.131516	-0.162447
0.405	-0.0779659	-0.0727015	-0.0749876	-0.0952302	-0.127816	-0.157464
0.406	-0.077211	-0.0719272	-0.0736903	-0.0933422	-0.124245	-0.152619
0.407	-0.0760099	-0.0709879	-0.0724095	-0.0913148	-0.120929	-0.14791
0.408	-0.0744844	-0.0700107	-0.0710932	-0.0891562	-0.117861	-0.143346
0.409	-0.0728379	-0.0690501	-0.0697159	-0.0869423	-0.114958	-0.138873
0.41	-0.0711037	-0.0679893	-0.068234	-0.0847204	-0.112136	-0.134423
0.411	-0.0692259	-0.0667487	-0.0666432	-0.0823986	-0.109326	-0.130048
0.412	-0.0673228	-0.0654016	-0.0650741	-0.0798401	-0.106486	-0.125881
0.413	-0.065693	-0.0639406	-0.0637107	-0.0770634	-0.103575	-0.121981
0.414	-0.0645259	-0.062204	-0.0625627	-0.0742128	-0.100643	-0.118331
0.415	-0.0636877	-0.0601352	-0.0615588	-0.0713523	-0.0979297	-0.114904
0.416	-0.0628681	-0.0578707	-0.0607204	-0.0684695	-0.0955911	-0.111642
0.417	-0.0618371	-0.0556618	-0.0599674	-0.0656494	-0.0935039	-0.108411
0.418	-0.0605176	-0.0538371	-0.0590748	-0.0630315	-0.091543	-0.105096
0.419	-0.0589416	-0.0526987	-0.0579107	-0.0606862	-0.0896962	-0.101767
0.42	-0.0571493	-0.0523486	-0.0565498	-0.0586909	-0.0878885	-0.0986485
0.421	-0.0551663	-0.0526729	-0.0551895	-0.0571486	-0.0859947	-0.0958636
0.422	-0.0531112	-0.0534642	-0.0539516	-0.0560298	-0.0839558	-0.0933994
0.423	-0.0511929	-0.0545202	-0.0528799	-0.0551583	-0.0817887	-0.0912327
0.424	-0.0495932	-0.0556729	-0.0520186	-0.0543682	-0.0794813	-0.0893209
0.425	-0.0484839	-0.0567525	-0.0513458	-0.0535935	-0.0769667	-0.0875517
0.426	-0.0480085	-0.057565	-0.0508328	-0.0528146	-0.0743065	-0.0858427
0.427	-0.0481099	-0.0579245	-0.0504842	-0.0519958	-0.0717111	-0.0842112
0.428	-0.0485962	-0.0577184	-0.0502919	-0.0510942	-0.0693065	-0.0826383
0.429	-0.0492728	-0.0569236	-0.0502241	-0.050049	-0.0670905	-0.0809838
0.43	-0.049906	-0.0555258	-0.0502449	-0.0488345	-0.0650654	-0.0791154
0.431	-0.0502816	-0.0535683	-0.0503707	-0.0475028	-0.0632392	-0.0770053
0.432	-0.0502635	-0.0513243	-0.0505638	-0.0461023	-0.0615538	-0.0747645
0.433	-0.0498403	-0.0491737	-0.0506797	-0.0446933	-0.0599323	-0.072603
0.434	-0.0491846	-0.0473191	-0.0506307	-0.0433048	-0.0583514	-0.0705979
0.435	-0.0485052	-0.0457753	-0.0503494	-0.0418152	-0.0567893	-0.0686459
0.436	-0.0478469	-0.0445736	-0.0496456	-0.0401013	-0.0550985	-0.0666822
0.437	-0.0471281	-0.0438269	-0.0483843	-0.0381562	-0.0530905	-0.0647563
0.438	-0.0462895	-0.0435255	-0.0466721	-0.0359897	-0.050788	-0.0629008
0.439	-0.045239	-0.0435003	-0.0446955	-0.0336504	-0.048377	-0.0610337
0.44	-0.043833	-0.0435989	-0.0425948	-0.0312377	-0.0459941	-0.0590603
0.441	-0.042083	-0.0436325	-0.0405098	-0.0288262	-0.0437003	-0.0569865
0.442	-0.0401336	-0.0433575	-0.0385725	-0.0265224	-0.0415401	-0.054914
0.443	-0.0380896	-0.0426995	-0.036889	-0.0244218	-0.0395283	-0.0529965
0.444	-0.0360264	-0.0417669	-0.0355096	-0.0225006	-0.0376516	-0.0513357
0.445	-0.0340343	-0.0406246	-0.0344114	-0.0206816	-0.0359245	-0.0498788
0.446	-0.0321945	-0.0392472	-0.0335624	-0.0189741	-0.0343524	-0.0484673
0.447	-0.0305389	-0.0376516	-0.0329243	-0.0174854	-0.0329095	-0.0469661
0.448	-0.0290613	-0.0359318	-0.0324151	-0.0161629	-0.0316128	-0.0453243
0.449	-0.0277538	-0.0342017	-0.0318748	-0.0147545	-0.030515	-0.0435977
0.45	-0.0266084	-0.0325967	-0.0311316	-0.0131111	-0.0295947	-0.0419634
0.451	-0.0256331	-0.0313236	-0.030194	-0.0113006	-0.0287198	-0.0406444
0.452	-0.0248761	-0.030599	-0.0291922	-0.00950506	-0.0277752	-0.0397071
0.453	-0.0243364	-0.0304591	-0.0282013	-0.00785342	-0.026753	-0.039046
0.454	-0.0239081	-0.0307697	-0.0272201	-0.00638157	-0.0257128	-0.0385426
0.455	-0.0235444	-0.0314176	-0.0262473	-0.00510369	-0.024709	-0.0380247
0.456	-0.0232646	-0.0322931	-0.0253884	-0.00399021	-0.0236856	-0.037311
0.457	-0.0230077	-0.0332313	-0.0247965	-0.0029589	-0.0224806	-0.0363741
0.458	-0.022707	-0.0340443	-0.0245862	-0.0018607	-0.0210119	-0.0352731
0.459	-0.0223216	-0.0345231	-0.0248272	-0.000543685	-0.0193425	-0.0340652
0.46	-0.0217909	-0.0345643	-0.0255161	0.000916936	-0.0176161	-0.0328046
0.461	-0.0211516	-0.0342673	-0.0265747	0.00222855	-0.0160379	-0.0315159
0.462	-0.020567	-0.0338	-0.0278095	0.00316607	-0.0147633	-0.0302312
0.463	-0.0200934	-0.0332781	-0.0289248	0.00369749	-0.0138304	-0.0289819
0.464	-0.0195683	-0.0327755	-0.0297462	0.00392944	-0.0132314	-0.0276465
0.465	-0.0188507	-0.0323292	-0.0303418	0.00399792	-0.0128866	-0.0260369
0.466	-0.0179781	-0.0319285	-0.0307792	0.00392563	-0.0126204	-0.0241529
0.467	-0.0170893	-0.0315415	-0.0309393	0.00368988	-0.0122794	-0.0221639
0.468	-0.0163326	-0.0311765	-0.0306855	0.00339843	-0.0117964	-0.0202201
0.469	-0.0158382	-0.0309508	-0.030003	0.0031967	-0.0110958	-0.0183483
0.47	-0.0156886	-0.0309647	-0.0290018	0.00315098	-0.0101054	-0.0165114
0.471	-0.0157849	-0.0311505	-0.0278953	0.00331347	-0.00884139	-0.0146906
0.472	-0.0158433	-0.0314557	-0.0268554	0.00372813	-0.00738974	-0.0129124
0.473	-0.0156319	-0.0319584	-0.025959	0.00438211	-0.00594738	-0.0112669
0.474	-0.0151569	-0.0326177	-0.0252818	0.00518425	-0.00473253	-0.00985911
0.475	-0.014605	-0.0332498	-0.0248835	0.00595516	-0.00379234	-0.00871988
0.476	-0.0141059	-0.0337644	-0.0247563	0.00650819	-0.00300005	-0.00778187
0.477	-0.0136779	-0.0341062	-0.0248256	0.00679011	-0.00219067	-0.00703712
0.478	-0.0134083	-0.0341912	-0.0250162	0.00689492	-0.00140085	-0.00662769
0.479	-0.013421	-0.0340626	-0.0253265	0.00689408	-0.000842998	-0.00662669
0.48	-0.0137435	-0.0338415	-0.0257913	0.00675124	-0.000622869	-0.00689614
0.481	-0.0143819	-0.0335843	-0.0264418	0.00649168	-0.000686164	-0.00723871
0.482	-0.0153594	-0.0333207	-0.0272065	0.00627615	-0.000897861	-0.00749835
0.483	-0.0165906	-0.0330476	-0.0278371	0.00618183	-0.00115751	-0.00750492
0.484	-0.0178084	-0.0327192	-0.0281827	0.00609165	-0.00150626	-0.00718335
0.485	-0.0188002	-0.0323633	-0.0284038	0.00586733	-0.0019976	-0.00667465
0.486	-0.0196337	-0.0321763	-0.0287638	0.00542533	-0.0025186	-0.00619792
0.487	-0.0204244	-0.032418	-0.0293904	0.00472019	-0.00293034	-0.0059577
0.488	-0.0210811	-0.0331482	-0.0301276	0.00385337	-0.00327485	-0.00609192
0.489	-0.021521	-0.0341723	-0.0306241	0.00301306	-0.00364202	-0.0065539
0.49	-0.0218779	-0.0352123	-0.030699	0.002319	-0.00400536	-0.00719747
0.491	-0.0222924	-0.0360352	-0.0304038	0.00182018	-0.00427638	-0.00792759
0.492	-0.022785	-0.0364975	-0.0298407	0.00147994	-0.00439941	-0.00865405
0.493	-0.0233816	-0.0365313	-0.0291097	0.0012542	-0.00443208	-0.0092977
0.494	-0.0241197	-0.0360983	-0.0282964	0.00114992	-0.00448291	-0.00986438
0.495	-0.0249131	-0.0353028	-0.0274833	0.00116792	-0.00458389	-0.0103877
0.496	-0.0255459	-0.0343674	-0.0267556	0.00133605	-0.00477247	-0.0108606
0.497	-0.0258771	-0.0333217	-0.0261233	0.00161177	-0.00512991	-0.0112016
0.498	-0.0259569	-0.0320729	-0.0255084	0.00180015	-0.00564628	-0.0113475
0.499	-0.0259328	-0.030713	-0.0248374	0.00177906	-0.00621641	-0.0113283
0.5	-0.0259455	-0.029485	-0.0240459	0.00163036	-0.00671589	-0.0111751
0.501	-0.0260872	-0.0285622	-0.0230495	0.00146998	-0.00699525	-0.0109706
0.502	-0.0263749	-0.0279653	-0.0218024	0.00136487	-0.00695384	-0.0108441
0.503	-0.026784	-0.0276606	-0.0203723	0.00137518	-0.00665983	-0.0108127
0.504	-0.027246	-0.0276198	-0.0188975	0.0015319	-0.00628267	-0.0108659
0.505	-0.0275812	-0.0277675	-0.0173957	0.00187983	-0.00595095	-0.0110999
0.506	-0.0276219	-0.0280163	-0.0158041	0.0024385	-0.00572724	-0.011599
0.507	-0.0273915	-0.0283852	-0.0142859	0.00314373	-0.00563549	-0.0122904
0.508	-0.0269556	-0.0289186	-0.0130936	0.00396216	-0.00567276	-0.012994
0.509	-0.0262538	-0.0295391	-0.0121755	0.00484552	-0.00582293	-0.013544
0.51	-0.0252617	-0.0300687	-0.0113737	0.00565765	-0.00606243	-0.0138456
0.511	-0.0240842	-0.0303388	-0.0108031	0.00634274	-0.00636848	-0.013908
0.512	-0.0228252	-0.030281	-0.0106543	0.00697199	-0.00667969	-0.0138223
0.513	-0.0215696	-0.029827	-0.0109054	0.00756518	-0.00690009	-0.0136995
0.514	-0.020461	-0.0288085	-0.0114406	0.00806116	-0.0070559	-0.0135807
0.515	-0.0196741	-0.0271399	-0.0121402	0.00844376	-0.00723631	-0.0134309
0.516	-0.0192916	-0.0250311	-0.0128282	0.00878094	-0.0073779	-0.0133609
0.517	-0.0192121	-0.0229087	-0.0133525	0.00915518	-0.00739351	-0.0135535
0.518	-0.0191728	-0.0211505	-0.0136492	0.00958191	-0.00735674	-0.0139628
0.519	-0.0188891	-0.0199566	-0.0137268	0.0100339	-0.00742544	-0.0144701
0.52	-0.0182158	-0.0193407	-0.013658	0.0105271	-0.00768255	-0.0150651
0.521	-0.0172398	-0.01918	-0.0135397	0.0111712	-0.00806702	-0.0157311
0.522	-0.0162444	-0.0192963	-0.0134404	0.0120482	-0.00845749	-0.0163865
0.523	-0.0154353	-0.0194917	-0.0134111	0.013058	-0.00873155	-0.0169703
0.524	-0.0147645	-0.0195722	-0.0134699	0.0139764	-0.00879277	-0.0175385
0.525	-0.0141738	-0.0193371	-0.0134769	0.0146423	-0.00865037	-0.0181467
0.526	-0.0136644	-0.0186245	-0.0132314	0.0151397	-0.00840643	-0.0187238
0.527	-0.0131274	-0.0173994	-0.0127401	0.0157128	-0.00812356	-0.0191489
0.528	-0.0125133	-0.0157778	-0.01214	0.0164534	-0.00780256	-0.0193389
0.529	-0.0119388	-0.0139418	-0.0115064	0.0171711	-0.00747859	-0.0192582
0.53	-0.0114776	-0.0120081	-0.0109172	0.0176367	-0.00718566	-0.0188636
0.531	-0.0111457	-0.0100379	-0.0104473	0.0179175	-0.00689278	-0.0181318
0.532	-0.0110124	-0.00811412	-0.00998749	0.0182707	-0.00657177	-0.0171462
0.533	-0.0110978	-0.00634156	-0.00931161	0.0187784	-0.00624844	-0.0160523
0.534	-0.0112302	-0.00483721	-0.00828142	0.0193188	-0.00595907	-0.0150009
0.535	-0.0111424	-0.00364733	-0.00689499	0.0197842	-0.00572142	-0.014054
0.536	-0.0106835	-0.00271154	-0.00531269	0.0201461	-0.00555086	-0.0131119
0.537	-0.00987805	-0.00201842	-0.00376047	0.0204173	-0.00540986	-0.0120987
0.538	-0.00885997	-0.00158955	-0.00240157	0.0206731	-0.00518544	-0.0110919
0.539	-0.00770844	-0.00135904	-0.00140214	0.0209867	-0.00483392	-0.0101996
0.54	-0.00636999	-0.00125567	-0.000932362	0.0213672	-0.0044312	-0.00940687
0.541	-0.00488346	-0.00129697	-0.00104445	0.0218792	-0.00406343	-0.00855951
0.542	-0.00349749	-0.00150501	-0.00162607	0.0226344	-0.00379873	-0.00757287
0.543	-0.0024294	-0.00175351	-0.00240776	0.0236495	-0.00360283	-0.00655435
0.544	-0.00169552	-0.00185695	-0.00304599	0.0248747	-0.00326444	-0.00562961
0.545	-0.00123957	-0.00182241	-0.00333666	0.0262195	-0.00264283	-0.00477462
0.546	-0.00102319	-0.00179119	-0.00332205	0.0275107	-0.00182278	-0.00389103
0.547	-0.000969139	-0.00179816	-0.00316953	0.028571	-0.000858221	-0.00298407
0.548	-0.00100093	-0.00184547	-0.00301982	0.0293012	0.000350126	-0.00215456
0.549	-0.00106926	-0.00209018	-0.00291396	0.0296504	0.00183852	-0.00145014
0.55	-0.00108229	-0.00270174	-0.00281494	0.0296089	0.00351709	-0.000792284
0.551	-0.00098725	-0.00365867	-0.00266015	0.0292621	0.00530297	-7.43143e-05
0.552	-0.00083559	-0.00480697	-0.00239784	0.0287674	0.00710731	0.000765305
0.553	-0.000566147	-0.00598642	-0.00198412	0.0283396	0.00877941	0.00178253
0.554	-2.35411e-06	-0.00715778	-0.00136657	0.0282527	0.0101886	0.00294852
0.555	0.000885911	-0.00842546	-0.000566488	0.0286455	0.0113236	0.00410856
0.556	0.00200604	-0.00984696	0.000284123	0.0293777	0.0122479	0.00507669
0.557	0.00324783	-0.0113623	0.0010331	0.0302271	0.0130062	0.00572045
0.558	0.00451485	-0.0127846	0.00155151	0.0310436	0.0136676	0.00605725
0.559	0.00577471	-0.013743	0.00173813	0.0317217	0.0143329	0.00625177
0.56	0.00697822	-0.0139513	0.00162378	0.0322638	0.0150142	0.00648382
0.561	0.00800876	-0.0135158	0.00137149	0.0327395	0.0156629	0.00684233
0.562	0.00878893	-0.0127748	0.00107028	0.0330989	0.0163127	0.00730496
0.563	0.00931535	-0.0119258	0.000729401	0.0331825	0.0170253	0.00779444
0.564	0.00957502	-0.0109568	0.000407641	0.0329112	0.0177533	0.00828793
0.565	0.00952816	-0.00988914	0.000196549	0.0323892	0.0184007	0.00882035
0.566	0.00912218	-0.00883482	0.000223422	0.0317992	0.0189419	0.00941855
0.567	0.00830199	-0.00783923	0.000560216	0.0312537	0.019402	0.0101701
0.568	0.00709838	-0.00690475	0.00105533	0.030801	0.0198093	0.0112052
0.569	0.00561838	-0.0060867	0.00148081	0.030424	0.0202135	0.0125238
0.57	0.00398312	-0.00542885	0.00178876	0.030042	0.0206911	0.0139387
0.571	0.00234176	-0.00488909	0.00206575	0.0296733	0.0213136	0.0152233
0.572	0.000823595	-0.00438252	0.00238885	0.0294599	0.0221183	0.0163224
0.573	-0.000458124	-0.00386017	0.00283333	0.0294504	0.0230449	0.0173318
0.574	-0.00134561	-0.00332499	0.00349382	0.0295399	0.02392	0.0182946
0.575	-0.0016841	-0.00284438	0.004391	0.0296978	0.0246307	0.0191108
0.576	-0.00143892	-0.00251336	0.00531703	0.0300464	0.0252479	0.0196172
0.577	-0.000738775	-0.00235525	0.00588487	0.030639	0.0259076	0.0197645
0.578	0.0002297	-0.0023591	0.00585728	0.0313762	0.0266499	0.0196893
0.579	0.00123473	-0.00250457	0.0053292	0.0321389	0.0273681	0.0195665
0.58	0.00199552	-0.00270299	0.0045601	0.0328539	0.027874	0.019465
0.581	0.00239644	-0.00278096	0.00379004	0.0334681	0.0280546	0.0193989
0.582	0.00249269	-0.00250561	0.00315735	0.0339529	0.027982	0.0194203
0.583	0.00228233	-0.00178487	0.00265056	0.0342916	0.0277597	0.0196076
0.584	0.00181055	-0.000808955	0.00225834	0.0344395	0.0273352	0.0200532
0.585	0.00133216	0.000142048	0.00203109	0.0344058	0.0266736	0.0208498
0.586	0.00108335	0.000896737	0.00188634	0.0342764	0.0259805	0.0219957
0.587	0.00112398	0.00136918	0.00169491	0.0340941	0.0255594	0.0233498
0.588	0.00146812	0.00152599	0.00151328	0.0339303	0.0255633	0.0247223
0.589	0.00211865	0.00142891	0.00143343	0.0339127	0.0259866	0.0259594
0.59	0.00293581	0.00114358	0.00135954	0.0341047	0.0267341	0.0269245
0.591	0.00368938	0.000659387	0.00112338	0.0345443	0.027639	0.0275445
0.592	0.00431441	8.70708e-06	0.000692317	0.0351823	0.0285774	0.0278828
0.593	0.00487886	-0.000683549	0.000107416	0.0357812	0.0295386	0.028088
0.594	0.00538077	-0.00131819	-0.000656406	0.0361506	0.0304618	0.0283081
0.595	0.00578632	-0.00190195	-0.00155959	0.0362817	0.0311803	0.0285995
0.596	0.00610327	-0.00240958	-0.0024306	0.0362136	0.0316386	0.0288951
0.597	0.00634773	-0.00267107	-0.00314015	0.0360473	0.0319422	0.0290849
0.598	0.00649543	-0.00254554	-0.00362107	0.0359165	0.0321722	0.0291316
0.599	0.00649143	-0.00213125	-0.00382038	0.035824	0.0323654	0.0290703
0.6	0.00634176	-0.00175057	-0.00369152	0.0356648	0.0326338	0.0289394
0.601	0.00610229	-0.00168267	-0.00319787	0.0353738	0.0330949	0.0287866
0.602	0.00579088	-0.00192475	-0.00241749	0.0350145	0.0337042	0.0286585
0.603	0.00544501	-0.0022507	-0.00150404	0.0347381	0.0343005	0.0286016
0.604	0.00517113	-0.00248813	-0.000582086	0.0346865	0.0347491	0.0286878
0.605	0.00505576	-0.00262187	0.000211578	0.034899	0.0349804	0.0289268
0.606	0.0051484	-0.00263629	0.000718135	0.0352488	0.0350368	0.0292162
0.607	0.00551904	-0.00254618	0.000798808	0.0355604	0.0350553	0.0294733
0.608	0.00621793	-0.00240884	0.000376223	0.0358051	0.0351135	0.0297117
0.609	0.00715229	-0.00211293	-0.000539003	0.0360852	0.0352572	0.0299392
0.61	0.00805318	-0.00148712	-0.00184621	0.0364699	0.035551	0.030134
0.611	0.00866515	-0.000554634	-0.00336069	0.0369285	0.0359583	0.0302881
0.612	0.00893979	0.000531691	-0.0048842	0.0373245	0.0363644	0.0303659
0.613	0.00890523	0.00159291	-0.00624518	0.0375108	0.0366882	0.0303607
0.614	0.00843061	0.00243138	-0.00727623	0.0374697	0.0368899	0.0303983
0.615	0.0073357	0.00294881	-0.0078387	0.0372495	0.0369602	0.0306424
0.616	0.00564838	0.00317957	-0.00789049	0.0368348	0.0369288	0.0311615
0.617	0.00359476	0.00310509	-0.00756913	0.0361759	0.0368037	0.0319059
0.618	0.00144753	0.00263653	-0.00714585	0.0353276	0.0364939	0.0327276
0.619	-0.000526766	0.00177582	-0.00680698	0.0344751	0.0359055	0.0334374
0.62	-0.00213428	0.000622642	-0.00655583	0.0338038	0.0350952	0.0338702
0.621	-0.00333204	-0.000681631	-0.0063254	0.0334218	0.0342379	0.0339621
0.622	-0.00416158	-0.00194473	-0.00605306	0.033364	0.0335117	0.033789
0.623	-0.00468646	-0.00298152	-0.00573589	0.0336028	0.0330478	0.0334941
0.624	-0.00498049	-0.00372953	-0.00548174	0.034056	0.0329133	0.0331398
0.625	-0.00506661	-0.00424354	-0.00541925	0.0345738	0.0331212	0.0326795
0.626	-0.0049203	-0.00459449	-0.00556661	0.0349894	0.0336347	0.0321281
0.627	-0.00457062	-0.00479334	-0.00584274	0.0352183	0.0343666	0.0316
0.628	-0.00412393	-0.00479167	-0.00622873	0.0352611	0.0351943	0.0312057
0.629	-0.00367133	-0.00460186	-0.00677198	0.0351312	0.0359578	0.0310393
0.63	-0.00316921	-0.00436733	-0.00741594	0.0348879	0.0364854	0.0311684
0.631	-0.00249453	-0.00423862	-0.00801707	0.0346611	0.0367496	0.0316231
0.632	-0.0017241	-0.00425872	-0.00848347	0.034512	0.0369312	0.0323243
0.633	-0.00115479	-0.0043635	-0.00879941	0.0344254	0.0371964	0.0330475
0.634	-0.000974952	-0.00441639	-0.00897689	0.0344054	0.037553	0.0336315
0.635	-0.00109986	-0.00435787	-0.00902575	0.0343976	0.0379517	0.034099
0.636	-0.0013297	-0.00430928	-0.00894896	0.0342239	0.0384028	0.0344743
0.637	-0.00156083	-0.00438293	-0.00877423	0.0336978	0.0389683	0.0346413
0.638	-0.00174734	-0.00455766	-0.00858522	0.0327797	0.0396192	0.0345105
0.639	-0.00176311	-0.0048119	-0.00846969	0.0316372	0.0401845	0.0341885
0.64	-0.00149354	-0.00517665	-0.00851509	0.0305565	0.0405087	0.0338352
0.641	-0.000977748	-0.00565241	-0.00878215	0.0297841	0.0406153	0.0335223
0.642	-0.000359226	-0.00610272	-0.00921909	0.0294386	0.0406249	0.0332529
0.643	0.000250101	-0.00631502	-0.00972104	0.0294856	0.0405518	0.0329847
0.644	0.000811021	-0.0062403	-0.0101786	0.0298233	0.0403204	0.0326938
0.645	0.00136265	-0.00587445	-0.0105288	0.030402	0.0398914	0.0324253
0.646	0.00196596	-0.00506362	-0.0108407	0.0311755	0.0392767	0.0321991
0.647	0.00254751	-0.00371613	-0.0112079	0.03206	0.0385662	0.0319625
0.648	0.00297275	-0.00185354	-0.0116199	0.0329978	0.037948	0.0317164
0.649	0.00319608	0.000473894	-0.0120372	0.0339365	0.0375905	0.0315166
0.65	0.00318573	0.0030859	-0.0124246	0.03476	0.0375047	0.0313723
0.651	0.00290485	0.00567317	-0.0126735	0.0353474	0.0375769	0.0312919
0.652	0.00238788	0.00790002	-0.0127059	0.0356786	0.0377163	0.0313211
0.653	0.00171912	0.00952204	-0.0126341	0.0357734	0.0378734	0.0314871
0.654	0.000983065	0.0104974	-0.012685	0.0356277	0.0379936	0.0317786
0.655	0.000236058	0.0109459	-0.0129506	0.0352714	0.0380759	0.0322063
0.656	-0.000399292	0.0110178	-0.0132748	0.0348087	0.0381488	0.0327773
0.657	-0.000669765	0.0107868	-0.0133968	0.0343793	0.0381976	0.0333963
0.658	-0.000454002	0.0102754	-0.0131615	0.0340703	0.0382017	0.0339622
0.659	9.80274e-05	0.00950843	-0.0126066	0.0338969	0.0381008	0.0344892
0.66	0.000767175	0.00846264	-0.0118487	0.0338602	0.0378127	0.0350148
0.661	0.00138338	0.00723184	-0.0110093	0.0339618	0.0373775	0.0354914
0.662	0.00183424	0.00612986	-0.0102541	0.0341777	0.0368979	0.0358636
0.663	0.0020681	0.00539094	-0.00970279	0.0345008	0.0364273	0.0361257
0.664	0.00205544	0.00499715	-0.009305	0.0349162	0.0360556	0.0362575
0.665	0.00179562	0.00484248	-0.0088894	0.0353129	0.0359291	0.0362926
0.666	0.00134612	0.00491202	-0.00835105	0.0356175	0.0361104	0.0363309
0.667	0.000810411	0.00519555	-0.00778498	0.0359222	0.0365465	0.0364651
0.668	0.000311907	0.00553406	-0.00740261	0.0363129	0.0371758	0.036721
0.669	-5.13416e-05	0.00573908	-0.00726361	0.0367264	0.0379766	0.0369792
0.67	-0.000244357	0.00574202	-0.00719293	0.037046	0.0388736	0.0371293
0.671	-0.000270693	0.00555202	-0.00706032	0.0372334	0.0397078	0.0371532
0.672	-0.000128251	0.00523759	-0.0069002	0.0373297	0.0404061	0.0370207
0.673	0.000154338	0.00492201	-0.00676415	0.0373151	0.0410683	0.0367032
0.674	0.000529016	0.00468942	-0.00677552	0.0370874	0.0418367	0.0361474
0.675	0.00104511	0.00456403	-0.00714228	0.0366629	0.0427401	0.0352961
0.676	0.00177536	0.00459887	-0.00785957	0.0362088	0.0437177	0.0342673
0.677	0.00264623	0.0048699	-0.00868004	0.0358763	0.0447341	0.0333116
0.678	0.00350929	0.00532403	-0.00943543	0.0356708	0.0457453	0.0325895
0.679	0.00427029	0.00579442	-0.010105	0.0354722	0.0466056	0.032216
0.68	0.00491213	0.00617182	-0.0106591	0.0353013	0.0471047	0.0323837
0.681	0.00541949	0.00643881	-0.0109922	0.0353762	0.0471164	0.0331627
0.682	0.00570568	0.00660588	-0.0109447	0.0357671	0.0467089	0.0343236
0.683	0.00572559	0.0066033	-0.0104363	0.0362713	0.0460733	0.0355883
0.684	0.00554603	0.00622488	-0.00961606	0.036658	0.0453564	0.0368396
0.685	0.00522623	0.00533915	-0.0087242	0.0368372	0.0446311	0.0380062
0.686	0.00476861	0.0040869	-0.00784499	0.0368253	0.0439317	0.0390051
0.687	0.00423322	0.00272855	-0.00697546	0.036683	0.0432818	0.0397767
0.688	0.00373026	0.00145585	-0.00619568	0.0364265	0.0427357	0.0402579
0.689	0.0032629	0.00040356	-0.00559485	0.0359936	0.0423245	0.0403507
0.69	0.00276133	-0.000310244	-0.00513268	0.0353552	0.0420157	0.0400457
0.691	0.00224156	-0.000640734	-0.00469486	0.0346199	0.041763	0.0394357
0.692	0.00177832	-0.00068191	-0.00422373	0.0339786	0.0415328	0.038507
0.693	0.00138124	-0.000591981	-0.00381481	0.0334985	0.0412874	0.0372579
0.694	0.00107421	-0.000460114	-0.00364553	0.0330864	0.040981	0.0358592
0.695	0.000975682	-0.000360926	-0.00367855	0.0326783	0.0406567	0.0344988
0.696	0.00114132	-0.000428007	-0.0036149	0.0322972	0.0404687	0.0333102
0.697	0.00145792	-0.000664167	-0.00319555	0.0319864	0.0404965	0.0323803
0.698	0.0017157	-0.000920789	-0.00232558	0.0317997	0.0406638	0.031749
0.699	0.0017644	-0.00120609	-0.000968938	0.0318016	0.040878	0.0314713
0.7	0.0015511	-0.00171703	0.000796506	0.0320154	0.0411042	0.0316642
0.701	0.000999318	-0.00259737	0.00268559	0.0323907	0.0413171	0.0324257
0.702	3.4455e-05	-0.00382017	0.00440121	0.0328221	0.0414815	0.0336692
0.703	-0.00126082	-0.00518213	0.00579841	0.0332028	0.0416074	0.0351883
0.704	-0.00261656	-0.00643243	0.00680322	0.0334887	0.0417576	0.0367825
0.705	-0.0037388	-0.00748644	0.00745387	0.0337436	0.0419294	0.0381908
0.706	-0.00452826	-0.00843779	0.00790304	0.0340775	0.0420442	0.0392595
0.707	-0.00512851	-0.00930958	0.00816379	0.0345156	0.0420763	0.0401344
0.708	-0.00567924	-0.0099791	0.00812952	0.0350434	0.0420778	0.0409656
0.709	-0.00605665	-0.010378	0.0078099	0.0356769	0.0420843	0.0416459
0.71	-0.00605814	-0.0104603	0.00731872	0.0363883	0.0420547	0.0419714
0.711	-0.00575575	-0.010102	0.00678796	0.0371285	0.041969	0.0418445
0.712	-0.00541671	-0.00923077	0.00635719	0.0378834	0.0419038	0.0412809
0.713	-0.00514062	-0.00791988	0.00609715	0.0386188	0.0419317	0.0404012
0.714	-0.00481594	-0.00637539	0.00597684	0.039217	0.0419969	0.0394622
0.715	-0.00435679	-0.00481485	0.00594892	0.0395093	0.0419452	0.0386855
0.716	-0.00375731	-0.00337023	0.00599119	0.0394146	0.0417038	0.0380816
0.717	-0.00306567	-0.00219606	0.00614045	0.0389994	0.0413762	0.0375585
0.718	-0.00235441	-0.00149088	0.00646118	0.0383963	0.041103	0.0370351
0.719	-0.00161481	-0.00132452	0.00696083	0.0377078	0.0409174	0.036484
0.72	-0.000767202	-0.00157306	0.00765564	0.037001	0.0408074	0.0359295
0.721	0.00025567	-0.00207197	0.00853033	0.0363675	0.0407813	0.0353644
0.722	0.00145333	-0.00273268	0.00939929	0.0358793	0.0408399	0.0348292
0.723	0.00270034	-0.00351525	0.010078	0.0354926	0.0409563	0.034457
0.724	0.00380211	-0.00443401	0.0105223	0.035087	0.0410503	0.0343349
0.725	0.00470818	-0.00545692	0.0106454	0.0346474	0.0410246	0.0344893
0.726	0.00554848	-0.00639626	0.0103009	0.0342875	0.0408331	0.0348974
0.727	0.00639629	-0.00702719	0.00953386	0.0340323	0.0405187	0.0354107
0.728	0.00720346	-0.0072053	0.0085426	0.0337946	0.0402204	0.0358617
0.729	0.00792006	-0.0069107	0.007364	0.0335199	0.0401202	0.0362587
0.73	0.00844497	-0.00628455	0.00592629	0.0332499	0.0403276	0.0367187
0.731	0.00856453	-0.00552765	0.00432598	0.0331045	0.0408066	0.0372959
0.732	0.00809876	-0.00473031	0.00277315	0.0331526	0.0414606	0.0379271
0.733	0.00706744	-0.00390176	0.00138332	0.0333705	0.0422108	0.0384757
0.734	0.00574002	-0.00307033	0.000128542	0.0337064	0.0430068	0.0388672
0.735	0.00450408	-0.00230029	-0.0010838	0.034065	0.0438379	0.0391223
0.736	0.0036117	-0.00169449	-0.00229536	0.0343471	0.0446819	0.0392532
0.737	0.00310862	-0.00138079	-0.00340801	0.0345406	0.04545	0.039236
0.738	0.00293776	-0.00142097	-0.00421307	0.0346651	0.0460397	0.0390708
0.739	0.00301316	-0.00170327	-0.00454478	0.0347374	0.046414	0.0388183
0.74	0.00329474	-0.0020552	-0.0043932	0.0347976	0.0465293	0.0385804
0.741	0.00383763	-0.00244128	-0.00385494	0.0348747	0.046284	0.0384551
0.742	0.00464919	-0.00293246	-0.00306815	0.0350354	0.0456708	0.0385048
0.743	0.00548633	-0.00359631	-0.00220977	0.0353851	0.0448531	0.0387155
0.744	0.00596422	-0.00445598	-0.00138505	0.0359502	0.0440234	0.0389426
0.745	0.00593392	-0.00534082	-0.000539023	0.0366654	0.0432348	0.038976
0.746	0.00557738	-0.00588139	0.000346134	0.0374039	0.0424398	0.0387441
0.747	0.00505103	-0.00585221	0.0011175	0.0379782	0.0416987	0.0383866
0.748	0.00429598	-0.00531048	0.00169486	0.0382643	0.0411866	0.0380657
0.749	0.00322953	-0.00438674	0.00222551	0.0382984	0.040985	0.0378186
0.75	0.00188916	-0.00318644	0.00282614	0.0381478	0.0410557	0.0376683
0.751	0.00040342	-0.00189726	0.00341732	0.0378583	0.0413991	0.0376985
0.752	-0.0010794	-0.000801213	0.00392588	0.0375459	0.0420595	0.0378846
0.753	-0.00243904	-8.46747e-05	0.00431595	0.0373052	0.0429949	0.0380072
0.754	-0.00361873	0.000272662	0.00448675	0.0370344	0.0440724	0.0378778
0.755	-0.00456671	0.000354963	0.00434009	0.0365901	0.045181	0.0374957
0.756	-0.00517978	0.000234792	0.00378871	0.0360258	0.0461727	0.0369368
0.757	-0.00542658	1.40678e-05	0.00278705	0.0354213	0.0468063	0.036282
0.758	-0.0053599	-0.000293386	0.00140956	0.0347351	0.0469909	0.0356354
0.759	-0.00499627	-0.000750007	-0.000144024	0.0340015	0.0468856	0.035111
0.76	-0.00436339	-0.00131402	-0.00168919	0.0334175	0.0466646	0.0347723
0.761	-0.00362665	-0.00185809	-0.00320755	0.0331953	0.0463491	0.0345952
0.762	-0.00309346	-0.00226027	-0.00468356	0.0333862	0.0458818	0.0345162
0.763	-0.00298612	-0.00238052	-0.00599183	0.0337872	0.0452449	0.0344974
0.764	-0.00322403	-0.00210571	-0.00701361	0.0340978	0.0444815	0.0345699
0.765	-0.00361623	-0.00153497	-0.00763051	0.0342184	0.0436566	0.0348066
0.766	-0.00409032	-0.00097723	-0.00769424	0.0342628	0.0428322	0.0352445
0.767	-0.00456727	-0.000652344	-0.00715102	0.0343119	0.0420492	0.0358364
0.768	-0.00491606	-0.00054637	-0.00609987	0.0343996	0.0412535	0.0364857
0.769	-0.00508354	-0.000569453	-0.00473429	0.0346363	0.0403809	0.0371
0.77	-0.00507677	-0.000611546	-0.00334945	0.035	0.039535	0.0375872
0.771	-0.00488992	-0.000551484	-0.00221095	0.035239	0.0388977	0.0378967
0.772	-0.00452263	-0.00034365	-0.00133145	0.0352973	0.0385857	0.0380591
0.773	-0.00398911	3.73334e-05	-0.000537026	0.0354524	0.0386465	0.038199
0.774	-0.00331691	0.000628179	0.000302221	0.0359017	0.039065	0.0384712
0.775	-0.0025439	0.00145074	0.00114499	0.0365489	0.0397713	0.0389004
0.776	-0.00168852	0.0024811	0.00177575	0.0372196	0.0406438	0.039384
0.777	-0.000773038	0.00352173	0.00194978	0.0378542	0.0415416	0.0397749
0.778	0.000183514	0.00424633	0.00165349	0.038437	0.0423474	0.039906
0.779	0.00116914	0.00446275	0.00105697	0.038905	0.0429774	0.0397056
0.78	0.00209161	0.00423196	0.00018689	0.0391776	0.0434185	0.0392549
0.781	0.00275976	0.00371848	-0.000977834	0.0392357	0.0437195	0.0387006
0.782	0.00299465	0.00301553	-0.002186	0.0391041	0.0438997	0.0382028
0.783	0.00279466	0.00219612	-0.00304857	0.038747	0.0438857	0.0378875
0.784	0.00237725	0.00143346	-0.00342202	0.0380845	0.0436205	0.0378231
0.785	0.0020337	0.000936826	-0.00348298	0.0371488	0.0432023	0.0380762
0.786	0.0019355	0.00083753	-0.00347688	0.0362189	0.042821	0.0386596
0.787	0.00202492	0.00120218	-0.00356565	0.035619	0.0426108	0.0394666
0.788	0.00213683	0.00201368	-0.00385014	0.0353801	0.0425771	0.0403583
0.789	0.00221464	0.00305098	-0.00432149	0.0352728	0.0426738	0.0411698
0.79	0.00227905	0.00407551	-0.00481703	0.0350451	0.0429562	0.0417165
0.791	0.00224908	0.00511552	-0.00518008	0.0346363	0.0435183	0.0419123
0.792	0.00200643	0.00627799	-0.00542901	0.0342102	0.0442855	0.0417984
0.793	0.00156678	0.00759117	-0.00562383	0.0339402	0.0450507	0.0415002
0.794	0.00100843	0.00908946	-0.0057217	0.0338595	0.045679	0.0411605
0.795	0.000413076	0.0107278	-0.00569956	0.0338992	0.0461319	0.0408613
0.796	-0.000145947	0.0122924	-0.0055729	0.0339761	0.0463838	0.0406329
0.797	-0.000699094	0.0135472	-0.00529314	0.034087	0.0464051	0.0405465
0.798	-0.00127269	0.0144494	-0.00477665	0.034297	0.046163	0.0406963
0.799	-0.00182037	0.015169	-0.00400064	0.0345486	0.0456773	0.0410569
0.8	-0.00235997	0.0159189	-0.00310937	0.034641	0.0450801	0.0414264
0.801	-0.00298184	0.0167723	-0.00232654	0.0344609	0.0445113	0.0415583
0.802	-0.00376764	0.0176496	-0.00171933	0.0340701	0.0439512	0.0413322
0.803	-0.00463927	0.0184812	-0.00118098	0.0335721	0.0432905	0.0408223
0.804	-0.00531661	0.0191836	-0.000580346	0.0330223	0.0425737	0.0403139
0.805	-0.00565745	0.0195438	0.000118955	0.032503	0.0419852	0.0401217
0.806	-0.00577862	0.0194382	0.000906766	0.0321361	0.0416603	0.0403048
0.807	-0.00568786	0.0189512	0.00186564	0.0320039	0.041591	0.040696
0.808	-0.00519106	0.0182014	0.00308281	0.0321403	0.0416628	0.0410989
0.809	-0.00423271	0.0173528	0.00443829	0.0324793	0.0417758	0.0413981
0.81	-0.00303755	0.0166512	0.00562616	0.0328698	0.0418277	0.0415726
0.811	-0.00189927	0.0161979	0.00641594	0.0332336	0.0417013	0.0416053
0.812	-0.00104453	0.0158283	0.00680156	0.0335722	0.0414016	0.0415167
0.813	-0.000638293	0.0153559	0.00684751	0.0338674	0.0410725	0.0414395
0.814	-0.000709923	0.0147656	0.00656634	0.0340752	0.0408647	0.0414814
0.815	-0.00114989	0.0141082	0.00603011	0.0341348	0.0408175	0.0416458
0.816	-0.00178467	0.0133246	0.00540153	0.0340583	0.0408795	0.041881
0.817	-0.0024256	0.0122705	0.00479787	0.0339942	0.0410257	0.0421
0.818	-0.00300089	0.010945	0.00422201	0.0340654	0.0412908	0.0422354
0.819	-0.00358232	0.00951088	0.0035928	0.034266	0.0417338	0.0422815
0.82	-0.00421962	0.00810264	0.0028593	0.0345152	0.0423334	0.0422389
0.821	-0.00484309	0.00676931	0.00209191	0.0346692	0.0428957	0.0420727
0.822	-0.00531815	0.00553197	0.0014317	0.0346458	0.0431875	0.0417666
0.823	-0.00557109	0.00443602	0.000987813	0.0346806	0.0431699	0.0413341
0.824	-0.00561632	0.00354522	0.000714526	0.0351007	0.0430009	0.0407836
0.825	-0.00542567	0.00293079	0.00047117	0.035834	0.0428369	0.0401372
0.826	-0.00486901	0.00270362	0.000258348	0.0365317	0.0427568	0.0394603
0.827	-0.00381379	0.00296807	0.00019904	0.0369525	0.0428597	0.0388372
0.828	-0.00227009	0.00373683	0.000354133	0.0370105	0.0432561	0.0382977
0.829	-0.000477821	0.00491236	0.000653376	0.0367259	0.0438897	0.0378331
0.83	0.00119785	0.00631269	0.000940715	0.0362398	0.044536	0.0374504
0.831	0.00252471	0.00767855	0.00116498	0.0357396	0.0450406	0.0371735
0.832	0.00349517	0.00874157	0.0014721	0.0353568	0.045432	0.0370441
0.833	0.00412333	0.00941944	0.00193249	0.0351029	0.0458091	0.0370897
0.834	0.00430798	0.00982642	0.00234184	0.034847	0.0461808	0.0373223
0.835	0.00397322	0.0101094	0.00244852	0.0344517	0.0464664	0.0377584
0.836	0.00324136	0.0103864	0.00217912	0.0338793	0.0466096	0.0383583
0.837	0.00236245	0.0106848	0.00164384	0.0331837	0.0466035	0.0390092
0.838	0.00149495	0.0109579	0.00110462	0.0324746	0.046546	0.039622
0.839	0.000630992	0.0111741	0.000868947	0.0318098	0.0466157	0.040129
0.84	-0.000254678	0.0113193	0.00113143	0.0312186	0.0468334	0.0404156
0.841	-0.00107819	0.0114513	0.00183376	0.0308017	0.0470485	0.0403993
0.842	-0.00177312	0.0116734	0.00259614	0.0306356	0.0471247	0.0400851
0.843	-0.00238289	0.0119604	0.0029987	0.0307016	0.0470174	0.0395156
0.844	-0.00298702	0.0121692	0.00297537	0.0309753	0.046767	0.0387536
0.845	-0.00362565	0.0121702	0.00273355	0.0314022	0.0463574	0.0378616
0.846	-0.00426744	0.0118707	0.00243712	0.0318671	0.0457038	0.0369366
0.847	-0.00490995	0.0112579	0.00210996	0.0323853	0.044861	0.0361486
0.848	-0.00555167	0.0104587	0.00170266	0.0330786	0.0439953	0.0356396
0.849	-0.00602933	0.00962887	0.00117597	0.0338429	0.0432222	0.0354703
0.85	-0.00614893	0.00883018	0.000574205	0.0343962	0.0426011	0.035657
0.851	-0.00589338	0.00806186	1.14889e-05	0.0346003	0.0421723	0.0362004
0.852	-0.00533961	0.00727078	-0.000425214	0.0345384	0.0420152	0.0370844
0.853	-0.00449665	0.00641314	-0.000644803	0.034451	0.0422461	0.0382269
0.854	-0.00331341	0.00554988	-0.000464216	0.0345342	0.0429245	0.0394893
0.855	-0.00176582	0.00468619	0.000266587	0.0348194	0.0440172	0.0407157
0.856	2.96031e-05	0.00375632	0.00144402	0.0352599	0.0454032	0.0417369
0.857	0.00180292	0.00291821	0.00274825	0.0357519	0.0469316	0.0424149
0.858	0.00340559	0.00246234	0.0038916	0.0361698	0.0484528	0.0427218
0.859	0.00493273	0.00244693	0.00474205	0.0364437	0.0497569	0.0427003
0.86	0.00643926	0.00270364	0.00523064	0.0365456	0.0506204	0.042418
0.861	0.00780409	0.00304488	0.00523999	0.0364889	0.0509379	0.0420706
0.862	0.00889488	0.00338846	0.00472032	0.0363808	0.0507788	0.0418346
0.863	0.00966762	0.00379314	0.00382821	0.0363286	0.0503216	0.0416465
0.864	0.0101054	0.00435747	0.00281015	0.0363681	0.0496937	0.0413782
0.865	0.0101714	0.00509191	0.00183787	0.0365459	0.0489414	0.0410228
0.866	0.00979507	0.00590667	0.00103021	0.0368306	0.048153	0.0406743
0.867	0.00882982	0.00668367	0.000520766	0.0369999	0.0474614	0.0404156
0.868	0.00719983	0.00731389	0.000370701	0.0367997	0.0469515	0.0402552
0.869	0.00512875	0.00772976	0.000501135	0.0362042	0.0466077	0.0402177
0.87	0.0030461	0.00798841	0.00078865	0.0354186	0.046363	0.0403667
0.871	0.0012709	0.00823143	0.00117666	0.0346362	0.0462441	0.0407003
0.872	-0.000101232	0.00856017	0.00165313	0.0339187	0.0463473	0.0411221
0.873	-0.00104934	0.00905736	0.00213699	0.0332919	0.0467097	0.0415369
0.874	-0.00155313	0.00981035	0.00248059	0.0328347	0.047293	0.0419222
0.875	-0.00163156	0.0108432	0.00255355	0.0325693	0.0479597	0.0422761
0.876	-0.00133915	0.0121218	0.0023065	0.0324142	0.0485213	0.0425491
0.877	-0.000765378	0.0135431	0.00181373	0.0323588	0.0488566	0.0426937
0.878	-9.07602e-06	0.014893	0.00116672	0.0325221	0.0489089	0.0427317
0.879	0.000897795	0.0159842	0.000420368	0.0329637	0.0486962	0.042692
0.88	0.00196706	0.0168226	-0.000239863	0.0335825	0.0483646	0.0425829
0.881	0.00314356	0.0174925	-0.000552841	0.0342201	0.0480932	0.0424723
0.882	0.00425652	0.0179425	-0.000445017	0.0347306	0.0479643	0.0424619
0.883	0.00511293	0.0180537	2.65982e-05	0.0350159	0.0479797	0.0425889
0.884	0.0056248	0.0178539	0.000823388	0.0350436	0.0480983	0.0428257
0.885	0.00576513	0.0174562	0.00188835	0.0348492	0.0482411	0.0431817
0.886	0.00554053	0.0167831	0.00314138	0.0345378	0.0483705	0.0436967
0.887	0.005116	0.0156135	0.00440793	0.034225	0.0484652	0.0442919
0.888	0.00478964	0.0139497	0.00543101	0.0340021	0.0484021	0.0447643
0.889	0.00472549	0.0120641	0.00608299	0.0339106	0.0480976	0.0449227
0.89	0.00484774	0.0102382	0.00636778	0.0339497	0.0476503	0.0447375
0.891	0.00508071	0.00863009	0.00627129	0.0341816	0.0472531	0.044391
0.892	0.00548934	0.0072913	0.00569564	0.0346783	0.0470739	0.0441098
0.893	0.00608979	0.00619963	0.00458548	0.0353606	0.0471064	0.0439309
0.894	0.00676967	0.0052725	0.0031199	0.0360792	0.0472037	0.0436798
0.895	0.00748331	0.00438776	0.00154254	0.0367478	0.047273	0.0432053
0.896	0.00828501	0.00344352	-3.91694e-05	0.0373413	0.0472559	0.0425271
0.897	0.0092212	0.00248934	-0.00149757	0.0378611	0.0470964	0.0417988
0.898	0.0103026	0.00171165	-0.00262203	0.0382616	0.0468543	0.0412435
0.899	0.0114164	0.00121127	-0.00327509	0.0384404	0.0466591	0.0410179
0.9	0.0122804	0.00092376	-0.00345049	0.0383539	0.0465596	0.041151
0.901	0.0126511	0.000733739	-0.00322368	0.0380906	0.046549	0.0415887
0.902	0.0125785	0.000537844	-0.0027238	0.0377866	0.0466674	0.0421805
0.903	0.0123207	0.000208877	-0.00208644	0.0374936	0.0469823	0.0427273
0.904	0.0120568	-0.000310043	-0.00135797	0.0371779	0.0475033	0.0431641
0.905	0.0118191	-0.000886013	-0.000540551	0.0368062	0.0481366	0.0436349
0.906	0.0115529	-0.00135712	0.000278357	0.0364138	0.0487803	0.0442488
0.907	0.0111023	-0.00167735	0.00096656	0.0361237	0.0494266	0.044923
0.908	0.010346	-0.00181668	0.00143323	0.0360645	0.0500597	0.0455566
0.909	0.00940376	-0.00174704	0.00161956	0.0362784	0.0506177	0.0461016
0.91	0.00845989	-0.0015276	0.00150924	0.0367094	0.0510464	0.0464762
0.911	0.00750546	-0.00122251	0.00118785	0.0371737	0.0512542	0.0466143
0.912	0.00642261	-0.000847578	0.000814348	0.0374108	0.0511806	0.0465574
0.913	0.00509137	-0.000455192	0.000492703	0.0372813	0.0508735	0.0463921
0.914	0.00340889	-9.94328e-05	0.000204848	0.0368225	0.0503601	0.0461497
0.915	0.00138462	0.000276222	-6.77846e-05	0.0361573	0.0495986	0.0458666
0.916	-0.000802171	0.000793838	-0.000253269	0.0354718	0.0486141	0.0456369
0.917	-0.00282841	0.00149092	-0.00033555	0.034965	0.0475431	0.0455052
0.918	-0.00437501	0.00229537	-0.000414086	0.034686	0.0465944	0.0454185
0.919	-0.00534532	0.00308771	-0.000577403	0.0345187	0.0459472	0.0452634
0.92	-0.00586861	0.00373964	-0.000802004	0.0343494	0.0456087	0.0449629
0.921	-0.00613564	0.0041867	-0.000965923	0.0341107	0.0454934	0.0445836
0.922	-0.0062541	0.0044266	-0.000993876	0.0337744	0.0455248	0.0442065
0.923	-0.00622472	0.00445096	-0.000918867	0.0333944	0.0455936	0.0438201
0.924	-0.00604267	0.00425058	-0.000774074	0.0330767	0.0456278	0.0434619
0.925	-0.00568956	0.00384811	-0.00057884	0.0328879	0.0456518	0.043208
0.926	-0.00503546	0.00332173	-0.00042124	0.0328319	0.0456833	0.0429984
0.927	-0.00391929	0.00276038	-0.000387332	0.0329127	0.0457261	0.042741
0.928	-0.00239891	0.00225497	-0.000455328	0.0331268	0.0458353	0.0424693
0.929	-0.000753576	0.00195406	-0.000524478	0.0334273	0.0460359	0.04218
0.93	0.000831573	0.00198254	-0.000454499	0.0337522	0.0463097	0.0417657
0.931	0.00236601	0.00237289	-9.51259e-05	0.0341241	0.0466416	0.0412513
0.932	0.00388142	0.0031141	0.000674862	0.034625	0.0470157	0.040871
0.933	0.00528454	0.00411737	0.00193907	0.035192	0.0474422	0.0408105
0.934	0.00637915	0.00518456	0.00363128	0.0356514	0.0478875	0.0409864
0.935	0.00706964	0.0061252	0.0054421	0.0358999	0.0482359	0.0411487
0.936	0.00742116	0.00684426	0.00704927	0.03592	0.0484089	0.0411808
0.937	0.00748006	0.00734869	0.00834902	0.0357621	0.0484356	0.0411999
0.938	0.00725739	0.00774065	0.00938239	0.0355067	0.0484212	0.0413252
0.939	0.00688338	0.00813964	0.0101868	0.0352045	0.0484642	0.041529
0.94	0.00657084	0.00856582	0.0106948	0.0349402	0.0485751	0.0417589
0.941	0.00650951	0.00892037	0.0107951	0.0348484	0.0487072	0.0420302
0.942	0.00684913	0.00909307	0.0104925	0.0350091	0.0488593	0.0423316
0.943	0.00762591	0.0090384	0.0098874	0.0354273	0.0490243	0.0425832
0.944	0.00872311	0.00873821	0.00909944	0.0360167	0.0491267	0.0427842
0.945	0.00994721	0.00820444	0.00827935	0.0366173	0.0490621	0.0430284
0.946	0.0110981	0.00755375	0.00759346	0.037121	0.0487067	0.0433766
0.947	0.011997	0.00693447	0.00710595	0.0374607	0.0479977	0.0438499
0.948	0.0124698	0.00638762	0.00675428	0.0375337	0.0470618	0.0444098
0.949	0.012363	0.00589734	0.00653935	0.0372974	0.0461848	0.0449519
0.95	0.011698	0.00544047	0.00660692	0.036839	0.0455941	0.0453772
0.951	0.0106873	0.00491847	0.0070577	0.0362531	0.0452934	0.0456207
0.952	0.00949574	0.00424811	0.00781669	0.0355947	0.0451454	0.045707
0.953	0.0082002	0.00352771	0.00872208	0.0350105	0.0450747	0.0457351
0.954	0.00692257	0.0029475	0.00959904	0.0346966	0.0451322	0.045713
0.955	0.00579182	0.00256262	0.0102532	0.034717	0.0453114	0.0455267
0.956	0.00489778	0.00226317	0.0105441	0.0350013	0.0455073	0.0450941
0.957	0.00424382	0.00202304	0.0104432	0.0354734	0.0457751	0.0444406
0.958	0.0037481	0.0019551	0.00999033	0.0361047	0.0462393	0.0436134
0.959	0.00338305	0.00204981	0.00934951	0.0368697	0.0467848	0.0426361
0.96	0.00313964	0.0022078	0.00879225	0.0377373	0.0472271	0.0415714
0.961	0.00297647	0.00248955	0.00844621	0.0386463	0.0475122	0.0405003
0.962	0.0028977	0.00305169	0.00824809	0.0395188	0.0475891	0.0395431
0.963	0.00295877	0.00393784	0.00813409	0.0403313	0.0473831	0.038926
0.964	0.0033092	0.00511804	0.00813543	0.041031	0.0469121	0.0388004
0.965	0.00416234	0.00659058	0.00835651	0.0414966	0.0463025	0.039106
0.966	0.00556633	0.00832163	0.00886613	0.0417026	0.0457319	0.0397271
0.967	0.00730335	0.0101185	0.00960589	0.0417802	0.0453728	0.0406005
0.968	0.00911328	0.0116399	0.0104264	0.0418554	0.0452931	0.0416347
0.969	0.0108761	0.0126284	0.0111887	0.0419198	0.0454158	0.0426247
0.97	0.0125044	0.0130146	0.0118275	0.0419395	0.0456548	0.0433444
0.971	0.0139063	0.0128336	0.0123763	0.0420128	0.046006	0.0437896
0.972	0.015079	0.0122145	0.0128488	0.0423048	0.0464512	0.0441139
0.973	0.0160134	0.0113139	0.0130595	0.0428673	0.0469173	0.0443817
0.974	0.0166083	0.0102115	0.012785	0.0435931	0.047285	0.0446438
0.975	0.0168306	0.0089726	0.0120484	0.0443498	0.0473815	0.0449807
0.976	0.0168148	0.00772729	0.0110301	0.0450265	0.0471784	0.0453843
0.977	0.0167316	0.00661507	0.00985417	0.0454782	0.0468793	0.0457359
0.978	0.0165902	0.0056663	0.00859475	0.0456438	0.0466347	0.0459084
0.979	0.0162408	0.0047753	0.00732056	0.0455884	0.0463973	0.045906
0.98	0.0156138	0.00386914	0.00611081	0.0453444	0.0460727	0.0458284
0.981	0.0148238	0.00298009	0.00501591	0.0449121	0.0456668	0.0458293
0.982	0.014046	0.00215838	0.00395446	0.0443716	0.0452549	0.0460906
0.983	0.0134048	0.00148133	0.00278508	0.0438661	0.0448911	0.0466013
0.984	0.0129553	0.000989978	0.00151114	0.0434717	0.0446356	0.0470851
0.985	0.0126636	0.000603897	0.000288826	0.0431676	0.0445155	0.047295
0.986	0.0123825	0.00023814	-0.000755224	0.0429301	0.0444485	0.0472165
0.987	0.0119319	-8.39861e-05	-0.00156084	0.0427471	0.0443926	0.0469491
0.988	0.0112565	-0.000270956	-0.0021353	0.0426198	0.0444213	0.0466032
0.989	0.0105021	-0.000310107	-0.00257049	0.0425852	0.0445284	0.0462747
0.99	0.00985561	-0.00031341	-0.00294242	0.0426584	0.0446384	0.0459718
0.991	0.00941335	-0.000393195	-0.0033136	0.0427908	0.0447562	0.0456102
0.992	0.00924611	-0.000619223	-0.00367557	0.0429159	0.0448696	0.0451391
0.993	0.00937317	-0.00103689	-0.00391696	0.0429742	0.0449146	0.0446089
0.994	0.00970678	-0.00159422	-0.00402981	0.0429011	0.044932	0.0440778
0.995	0.0100761	-0.00208781	-0.00410211	0.0426632	0.0450573	0.0436076
0.996	0.0102623	-0.00225521	-0.00414017	0.0422999	0.045338	0.0433557
0.997	0.0101398	-0.00187871	-0.00410678	0.0418983	0.0457126	0.0434894
0.998	0.00976024	-0.000784217	-0.00402577	0.0415043	0.0461089	0.0440426
0.999	0.00916109	0.00103936	-0.00392181	0.0411135	0.0464059	0.0449492
1	0.00823976	0.00336506	-0.00371753	0.0407359	0.0464462	0.0461312
1.001	0.00703227	0.0059542	-0.00321649	0.0403544	0.0461724	0.0474605
1.002	0.00595664	0.0086581	-0.0022218	0.0398361	0.045691	0.0487295
1.003	0.00551938	0.0112936	-0.000688756	0.0390007	0.0452199	0.0497586
1.004	0.00587347	0.0136339	0.00126877	0.0377883	0.0448993	0.0504311
1.005	0.0067565	0.0154995	0.00339159	0.0362646	0.0446763	0.0506325
1.006	0.00769339	0.0168009	0.00536323	0.0345418	0.0444892	0.0503275
1.007	0.00824363	0.0175437	0.00700472	0.0327721	0.044382	0.0496463
1.008	0.00818634	0.0178369	0.00826053	0.0311505	0.0443293	0.0487693
1.009	0.00758321	0.0178736	0.00902797	0.0299238	0.0442376	0.0478058
1.01	0.00667279	0.0178346	0.00920814	0.0292428	0.0441088	0.046822
1.011	0.00569621	0.0178456	0.00884187	0.0289528	0.044	0.0458753
1.012	0.00485026	0.0180478	0.00805886	0.0287742	0.043945	0.0449833
1.013	0.00422688	0.0185449	0.00705785	0.0286506	0.0439448	0.0441357
1.014	0.00380776	0.0192964	0.00607471	0.0287248	0.0439888	0.0433295
1.015	0.00356163	0.0201627	0.00525162	0.0291181	0.0441087	0.0425467
1.016	0.00346903	0.0210413	0.00464331	0.0298651	0.0443453	0.0417816
1.017	0.00358597	0.0219406	0.00432679	0.0309304	0.0446363	0.0411094
1.018	0.00402574	0.0228413	0.00442182	0.0322201	0.0448718	0.0406395
1.019	0.00475801	0.0236273	0.00495291	0.033613	0.0450505	0.0404285
1.02	0.0056253	0.0241971	0.00576231	0.0349984	0.0452604	0.0404361
1.021	0.0066089	0.0245088	0.00663596	0.0363232	0.0455207	0.0405667
1.022	0.00787081	0.0246454	0.00743844	0.0375994	0.0457659	0.0407904
1.023	0.00947847	0.0247932	0.00812929	0.0388547	0.0460094	0.0411071
1.024	0.011214	0.0250427	0.00866018	0.0401181	0.0462859	0.04143
1.025	0.0127933	0.0252972	0.00893709	0.0413672	0.0465184	0.0416459
1.026	0.0141235	0.0254246	0.00896367	0.0424377	0.0466476	0.0417442
1.027	0.015132	0.0254058	0.00886359	0.0430824	0.0467345	0.0418662
1.028	0.0155823	0.0252508	0.00872576	0.0431609	0.0468741	0.0421951
1.029	0.0153027	0.0249648	0.00857621	0.0427464	0.0471399	0.0428412
1.03	0.0143879	0.0246227	0.0085003	0.0420355	0.0475921	0.0438975
1.031	0.0129803	0.0243205	0.00859806	0.0412334	0.0482013	0.0454187
1.032	0.0111293	0.0240815	0.00880472	0.0405282	0.0488317	0.0473176
1.033	0.00903757	0.0238004	0.00899621	0.0400527	0.0494488	0.0494491
1.034	0.00700849	0.0233561	0.00924072	0.0399243	0.050225	0.0516847
1.035	0.00510539	0.0227607	0.0097094	0.0402796	0.0513306	0.0538459
1.036	0.00330422	0.0220177	0.0104818	0.0411327	0.0527788	0.0557756
1.037	0.00181218	0.0210667	0.011641	0.0423747	0.0545191	0.0574689
1.038	0.000924444	0.0199919	0.0133406	0.0439772	0.0565446	0.0589858
1.039	0.00071135	0.0190015	0.0155907	0.0459205	0.0588103	0.0603729
1.04	0.00103202	0.0182883	0.0181963	0.0479961	0.0611375	0.0616624
1.041	0.0017764	0.0179781	0.0209565	0.0499423	0.0633097	0.0627882
1.042	0.00292236	0.0180353	0.0237276	0.0516251	0.0652116	0.0636041
1.043	0.00444386	0.018383	0.0263895	0.0530143	0.066852	0.0639997
1.044	0.00624853	0.0191248	0.0287686	0.05409	0.0682289	0.0639822
1.045	0.00807061	0.0204339	0.0305856	0.0547888	0.0692341	0.0636633
1.046	0.0095358	0.0223584	0.0316628	0.0550192	0.0697668	0.0631467
1.047	0.0104554	0.0248258	0.0320689	0.054735	0.0698578	0.0625262
1.048	0.0108624	0.0276044	0.0319475	0.0540503	0.0695847	0.0619244
1.049	0.0108009	0.03028	0.0313751	0.0531585	0.0689074	0.0614697
1.05	0.0103218	0.0325139	0.0304662	0.0521261	0.0677754	0.0612543
1.051	0.00958635	0.0342184	0.0295036	0.0509723	0.0663487	0.0612779
1.052	0.00879078	0.0354565	0.028774	0.0498133	0.0649148	0.061467
1.053	0.00814737	0.0363361	0.0283272	0.0487457	0.0636384	0.0616559
1.054	0.00791485	0.0369393	0.0280584	0.0477856	0.0624976	0.0615936
1.055	0.0082732	0.0373363	0.0278054	0.0469195	0.0613632	0.0611485
1.056	0.00927082	0.0376019	0.0273492	0.0461294	0.0600592	0.0603826
1.057	0.0108316	0.0377392	0.0266037	0.0455096	0.0585153	0.0593714
1.058	0.0127696	0.0377198	0.0256901	0.045209	0.0568804	0.0581785
1.059	0.014905	0.0375352	0.0247354	0.0452078	0.0553358	0.0569268
1.06	0.0171028	0.0371781	0.0237793	0.0453112	0.0539238	0.0557037
1.061	0.0192135	0.0366945	0.0229392	0.0453141	0.0526413	0.0545619
1.062	0.0210981	0.0361409	0.0224844	0.0451874	0.051558	0.0535523
1.063	0.0226842	0.035455	0.0225833	0.0450357	0.0507314	0.0526373
1.064	0.0239035	0.0345638	0.0231157	0.0448809	0.050099	0.051706
1.065	0.0246855	0.0335653	0.0238914	0.0446684	0.0495572	0.0506858
1.066	0.0250371	0.0325897	0.0248471	0.044371	0.0490067	0.0496332
1.067	0.0250194	0.0315784	0.02591	0.0439591	0.0483497	0.0487175
1.068	0.0247075	0.0304323	0.026899	0.04342	0.0475857	0.0480983
1.069	0.0242253	0.0292801	0.0276272	0.0428761	0.0468686	0.0477829
1.07	0.0237467	0.0284541	0.0280355	0.0425573	0.0463865	0.0476162
1.071	0.0234043	0.0282503	0.0281852	0.0426182	0.0462079	0.0474183
1.072	0.0232324	0.028699	0.0281257	0.0430222	0.0463583	0.0470985
1.073	0.0232341	0.029574	0.0278647	0.0436313	0.0469291	0.0467173
1.074	0.0234576	0.0306477	0.0274431	0.0444042	0.04791	0.0464865
1.075	0.0239303	0.0318285	0.0269624	0.0453416	0.0490957	0.0466036
1.076	0.0245967	0.0330849	0.0265361	0.0463116	0.0503328	0.047087
1.077	0.0253965	0.0344052	0.0262605	0.0471467	0.0515782	0.0477901
1.078	0.0262723	0.0357439	0.0262207	0.047838	0.0526937	0.0484744
1.079	0.0271519	0.0369804	0.0264055	0.0485059	0.0535239	0.0489997
1.08	0.0280018	0.0380766	0.0266377	0.0491836	0.0540642	0.0494668
1.081	0.0287626	0.0391492	0.0267041	0.0497353	0.0544236	0.0499929
1.082	0.0293492	0.0402982	0.0265491	0.0499857	0.0547354	0.0505646
1.083	0.0297741	0.0415063	0.0262724	0.0498469	0.055077	0.0511889
1.084	0.0300633	0.042625	0.0259243	0.0493942	0.0554259	0.0519104
1.085	0.0301831	0.0433474	0.025464	0.0488202	0.0557242	0.0527233
1.086	0.0301652	0.043399	0.0248663	0.0482423	0.0559594	0.053523
1.087	0.0301194	0.0427526	0.0241131	0.0476556	0.0561686	0.0541079
1.088	0.0300939	0.0415434	0.0232665	0.0470981	0.0563849	0.0543493
1.089	0.0299685	0.0399621	0.0225247	0.046636	0.0565572	0.054367
1.09	0.0295921	0.0382669	0.0221291	0.0462249	0.0566307	0.0543652
1.091	0.028997	0.0366796	0.0222592	0.0458437	0.056706	0.0543151
1.092	0.0283249	0.0352408	0.0229478	0.0455672	0.0569233	0.0540687
1.093	0.0276402	0.0339926	0.0242024	0.0453981	0.0572664	0.0536937
1.094	0.026814	0.0332008	0.026191	0.0452275	0.0576393	0.0534185
1.095	0.0255979	0.0331261	0.0291533	0.0449205	0.0580222	0.0533797
1.096	0.0239185	0.0338049	0.0332201	0.0443862	0.0584759	0.0535413
1.097	0.0219376	0.0351689	0.0384023	0.0435089	0.0590235	0.0538388
1.098	0.019721	0.0371166	0.0446052	0.0420534	0.0596041	0.0543566
1.099	0.0170582	0.039426	0.0515375	0.0397515	0.0601414	0.0551792
1.1	0.0136858	0.0417734	0.058667	0.0364212	0.0605257	0.0561472
1.101	0.00937547	0.0438381	0.0653157	0.0319453	0.0605918	0.0570121
1.102	0.00379999	0.0452149	0.0708266	0.0261576	0.0601865	0.057702
1.103	-0.00335426	0.0453314	0.0746136	0.0188748	0.0591679	0.0582451
1.104	-0.0122742	0.043648	0.0760443	0.00999295	0.057316	0.0585494
1.105	-0.0231019	0.0397604	0.074498	-0.000568454	0.0543145	0.0583804
1.106	-0.0358884	0.03325	0.069598	-0.0129828	0.0498909	0.057504
1.107	-0.0505286	0.0237229	0.0611518	-0.027462	0.0438772	0.0556897
1.108	-0.0668794	0.0110063	0.0490295	-0.0441139	0.036076	0.0525994
1.109	-0.0848606	-0.00483557	0.0333219	-0.0629964	0.0262173	0.0478352
1.11	-0.104454	-0.023604	0.0144152	-0.0842102	0.0141351	0.0411156
1.111	-0.125753	-0.0450835	-0.00720611	-0.107923	-0.000158932	0.0323517
1.112	-0.148959	-0.0691267	-0.0312258	-0.134399	-0.0166419	0.0215175
1.113	-0.174203	-0.0955941	-0.0575183	-0.16382	-0.0353702	0.00853475
1.114	-0.201461	-0.124202	-0.085928	-0.196087	-0.0563829	-0.00670102
1.115	-0.230686	-0.15452	-0.116222	-0.230947	-0.0796218	-0.02429
1.116	-0.261868	-0.186149	-0.148198	-0.2681	-0.105055	-0.0443542
1.117	-0.294814	-0.21882	-0.181586	-0.307193	-0.132807	-0.0670569
1.118	-0.329102	-0.252367	-0.215964	-0.347929	-0.162959	-0.0925336
1.119	-0.364327	-0.286674	-0.250939	-0.39009	-0.19534	-0.120829
1.12	-0.400184	-0.321552	-0.28625	-0.433478	-0.229664	-0.151918
1.121	-0.436413	-0.356776	-0.321708	-0.477936	-0.265689	-0.18574
1.122	-0.472807	-0.392209	-0.357119	-0.523298	-0.303215	-0.222132
1.123	-0.509234	-0.427721	-0.39232	-0.569365	-0.342163	-0.260756
1.124	-0.545716	-0.463177	-0.427332	-0.61609	-0.38264	-0.301263
1.125	-0.582343	-0.498534	-0.46231	-0.663595	-0.424712	-0.34335
1.126	-0.619069	-0.533791	-0.497256	-0.711872	-0.468234	-0.386666
1.127	-0.65565	-0.568918	-0.532035	-0.760703	-0.513003	-0.430911
1.128	-0.691819	-0.60386	-0.566567	-0.809909	-0.558819	-0.475956
1.129	-0.727507	-0.638498	-0.600793	-0.8595	-0.605448	-0.521809
1.13	-0.762805	-0.672612	-0.634632	-0.909592	-0.652633	-0.568454
1.131	-0.79784	-0.706037	-0.66802	-0.960181	-0.70013	-0.61571
1.132	-0.832683	-0.73877	-0.70091	-1.01104	-0.747782	-0.663359
1.133	-0.867294	-0.770945	-0.733267	-1.06188	-0.795497	-0.711298
1.134	-0.901617	-0.802696	-0.765065	-1.11251	-0.843173	-0.759435
1.135	-0.935575	-0.833939	-0.796258	-1.16273	-0.890746	-0.807647
1.136	-0.968986	-0.864472	-0.826785	-1.21248	-0.938141	-0.855843
1.137	-1.00163	-0.894168	-0.85658	-1.26171	-0.985176	-0.903962
1.138	-1.03338	-0.922934	-0.885564	-1.31025	-1.03161	-0.951934
1.139	-1.06417	-0.9507	-0.913712	-1.35789	-1.07727	-0.999658
1.14	-1.09396	-0.97748	-0.941068	-1.40454	-1.12216	-1.04699
1.141	-1.12285	-1.0033	-0.96767	-1.4501	-1.16637	-1.09381
1.142	-1.15099	-1.02812	-0.99348	-1.49445	-1.20989	-1.14005
1.143	-1.17853	-1.05193	-1.01843	-1.53757	-1.25263	-1.18564
1.144	-1.20553	-1.07474	-1.04248	-1.57954	-1.29446	-1.23048
1.145	-1.23198	-1.09659	-1.06572	-1.62038	-1.33532	-1.27439
1.146	-1.25791	-1.11767	-1.08828	-1.66006	-1.37522	-1.31717
1.147	-1.28337	-1.13819	-1.11025	-1.6986	-1.41418	-1.35877
1.148	-1.3082	-1.15825	-1.13154	-1.73603	-1.45207	-1.39932
1.149	-1.33215	-1.17786	-1.15203	-1.77234	-1.48883	-1.4388
1.15	-1.35507	-1.197	-1.17175	-1.8074	-1.52443	-1.47694
1.151	-1.37685	-1.21554	-1.19071	-1.841	-1.55877	-1.51339
1.152	-1.39731	-1.23332	-1.2089	-1.87313	-1.59171	-1.54803
1.153	-1.41631	-1.25026	-1.22636	-1.90386	-1.62328	-1.58086
1.154	-1.43388	-1.26631	-1.24304	-1.93323	-1.65352	-1.61198
1.155	-1.45017	-1.28141	-1.2588	-1.96125	-1.68245	-1.64148
1.156	-1.46536	-1.29557	-1.2735	-1.98798	-1.71007	-1.66945
1.157	-1.47964	-1.30886	-1.28697	-2.01347	-1.7363	-1.69601
1.158	-1.49331	-1.32141	-1.29911	-2.03768	-1.76104	-1.72131
1.159	-1.50665	-1.3333	-1.3099	-2.06059	-1.78419	-1.7455
1.16	-1.51971	-1.34452	-1.31937	-2.08223	-1.80587	-1.76869
1.161	-1.53239	-1.35508	-1.32753	-2.1027	-1.82633	-1.79091
1.162	-1.54464	-1.36503	-1.33451	-2.12205	-1.84579	-1.8121
1.163	-1.55645	-1.37433	-1.34058	-2.14023	-1.86428	-1.83221
1.164	-1.56774	-1.38274	-1.34609	-2.15718	-1.88178	-1.85118
1.165	-1.57832	-1.39	-1.35126	-2.17292	-1.89831	-1.86904
1.166	-1.58809	-1.396	-1.35605	-2.18753	-1.91387	-1.88579
1.167	-1.59724	-1.40078	-1.36038	-2.20116	-1.92844	-1.90142
1.168	-1.60595	-1.40454	-1.36428	-2.21387	-1.94198	-1.91593
1.169	-1.61416	-1.40766	-1.36766	-2.22557	-1.9545	-1.92935
1.17	-1.62173	-1.41057	-1.37043	-2.23618	-1.96608	-1.94168
1.171	-1.62858	-1.41344	-1.37272	-2.24574	-1.97665	-1.95293
1.172	-1.6347	-1.41617	-1.37484	-2.25429	-1.9861	-1.96321
1.173	-1.64008	-1.41865	-1.37699	-2.26189	-1.99443	-1.97267
1.174	-1.64478	-1.42092	-1.37916	-2.26865	-2.00176	-1.98145
1.175	-1.64887	-1.4231	-1.38123	-2.27467	-2.00819	-1.98954
1.176	-1.65238	-1.42525	-1.38295	-2.27997	-2.01383	-1.99676
1.177	-1.65529	-1.42727	-1.38417	-2.28445	-2.01884	-2.00287
1.178	-1.65773	-1.42899	-1.38492	-2.2881	-2.02322	-2.00772
1.179	-1.65985	-1.43035	-1.38527	-2.291	-2.02698	-2.01132
1.18	-1.66167	-1.43133	-1.38512	-2.29325	-2.03015	-2.01383
1.181	-1.66311	-1.43186	-1.38442	-2.2949	-2.03273	-2.01545
1.182	-1.66418	-1.4319	-1.38326	-2.29602	-2.0347	-2.01635
1.183	-1.66495	-1.4315	-1.38181	-2.29672	-2.036	-2.01666
1.184	-1.66548	-1.43079	-1.38023	-2.29711	-2.03661	-2.01649
1.185	-1.66586	-1.42984	-1.37866	-2.29721	-2.03656	-2.01603
1.186	-1.66619	-1.42856	-1.3772	-2.29711	-2.03589	-2.01543
1.187	-1.66641	-1.42683	-1.37586	-2.29687	-2.03467	-2.01477
1.188	-1.66636	-1.4247	-1.37458	-2.29636	-2.03301	-2.0141
1.189	-1.6659	-1.42237	-1.37333	-2.29542	-2.0309	-2.01333
1.19	-1.66488	-1.41987	-1.37201	-2.29399	-2.02836	-2.01231
1.191	-1.66315	-1.41708	-1.37047	-2.29208	-2.02556	-2.01086
1.192	-1.66075	-1.41388	-1.36867	-2.28977	-2.0228	-2.00891
1.193	-1.65787	-1.41031	-1.36666	-2.28716	-2.0202	-2.00645
1.194	-1.65474	-1.40647	-1.36454	-2.28427	-2.01763	-2.00352
1.195	-1.65149	-1.40239	-1.36234	-2.28107	-2.01484	-2.00016
1.196	-1.64827	-1.39805	-1.36006	-2.27764	-2.0116	-1.99636
1.197	-1.6452	-1.39365	-1.35763	-2.27404	-2.00781	-1.99203
1.198	-1.64227	-1.38939	-1.35488	-2.27028	-2.0036	-1.98715
1.199	-1.63938	-1.38535	-1.35157	-2.26635	-1.99909	-1.9819
1.2	-1.63655	-1.38151	-1.34754	-2.26226	-1.99418	-1.97652
1.201	-1.63372	-1.37789	-1.34285	-2.25804	-1.98884	-1.97122
1.202	-1.6307	-1.37449	-1.33771	-2.25372	-1.98329	-1.96618
1.203	-1.62733	-1.37119	-1.3323	-2.24919	-1.97783	-1.96142
1.204	-1.62367	-1.36782	-1.32675	-2.24437	-1.97257	-1.95686
1.205	-1.61977	-1.3642	-1.32118	-2.23922	-1.96745	-1.95239
1.206	-1.6156	-1.36013	-1.31566	-2.23379	-1.96236	-1.94795
1.207	-1.61113	-1.3556	-1.3103	-2.22818	-1.95726	-1.94349
1.208	-1.60634	-1.3508	-1.30517	-2.22237	-1.95218	-1.93896
1.209	-1.60118	-1.34588	-1.30034	-2.21626	-1.94718	-1.93419
1.21	-1.59554	-1.34086	-1.2958	-2.20979	-1.9423	-1.92907
1.211	-1.58951	-1.33575	-1.29142	-2.20305	-1.9374	-1.92365
1.212	-1.58333	-1.33065	-1.28711	-2.19623	-1.93216	-1.91806
1.213	-1.57736	-1.32564	-1.28298	-2.18956	-1.92644	-1.91235
1.214	-1.57181	-1.32078	-1.27912	-2.18314	-1.9203	-1.90643
1.215	-1.56664	-1.31606	-1.27546	-2.17682	-1.91384	-1.90021
1.216	-1.56161	-1.31141	-1.27197	-2.17037	-1.90717	-1.89365
1.217	-1.55656	-1.30675	-1.26865	-2.16359	-1.90037	-1.88675
1.218	-1.55146	-1.30211	-1.26548	-2.15645	-1.89353	-1.87948
1.219	-1.54628	-1.29766	-1.26242	-2.1491	-1.88674	-1.87184
1.22	-1.54089	-1.29346	-1.25931	-2.14179	-1.88006	-1.86399
1.221	-1.53529	-1.28939	-1.25605	-2.13461	-1.87337	-1.85616
1.222	-1.52962	-1.2853	-1.25257	-2.12745	-1.86651	-1.84848
1.223	-1.52411	-1.28111	-1.24878	-2.12012	-1.85947	-1.84102
1.224	-1.51881	-1.27681	-1.24466	-2.11254	-1.8524	-1.83379
1.225	-1.51357	-1.27239	-1.24032	-2.10485	-1.84546	-1.82683
1.226	-1.50816	-1.26775	-1.23591	-2.0972	-1.83866	-1.8201
1.227	-1.50254	-1.26277	-1.23156	-2.08976	-1.83187	-1.81357
1.228	-1.49679	-1.25751	-1.22737	-2.08262	-1.82497	-1.80727
1.229	-1.49107	-1.25223	-1.22343	-2.07577	-1.81798	-1.80121
1.23	-1.48548	-1.24725	-1.21978	-2.06901	-1.81096	-1.79526
1.231	-1.48	-1.24267	-1.21635	-2.06217	-1.80391	-1.78932
1.232	-1.47469	-1.23835	-1.21302	-2.05516	-1.79686	-1.78337
1.233	-1.46962	-1.23419	-1.20971	-2.04792	-1.78967	-1.77728
1.234	-1.46479	-1.23019	-1.20635	-2.04042	-1.78228	-1.77091
1.235	-1.4602	-1.22621	-1.20287	-2.03268	-1.77471	-1.7642
1.236	-1.45579	-1.2221	-1.19913	-2.02474	-1.76704	-1.7572
1.237	-1.45137	-1.21787	-1.19513	-2.01668	-1.7593	-1.74999
1.238	-1.44672	-1.21355	-1.19108	-2.00854	-1.75158	-1.7427
1.239	-1.4418	-1.20918	-1.18708	-2.0003	-1.74401	-1.73545
1.24	-1.43659	-1.20488	-1.18311	-1.99194	-1.73669	-1.72829
1.241	-1.4311	-1.20086	-1.17914	-1.98352	-1.7297	-1.72116
1.242	-1.42553	-1.19731	-1.17511	-1.97515	-1.72294	-1.71406
1.243	-1.42025	-1.19422	-1.17107	-1.96692	-1.71618	-1.70699
1.244	-1.41542	-1.1914	-1.16713	-1.95882	-1.70936	-1.69988
1.245	-1.41094	-1.18848	-1.16334	-1.95083	-1.70253	-1.6926
1.246	-1.40668	-1.18515	-1.15958	-1.94301	-1.6957	-1.6852
1.247	-1.40253	-1.18133	-1.15581	-1.93545	-1.68873	-1.67775
1.248	-1.39839	-1.17721	-1.15212	-1.9282	-1.68146	-1.67027
1.249	-1.39422	-1.17295	-1.14861	-1.92108	-1.67385	-1.66271
1.25	-1.39002	-1.16861	-1.14527	-1.91384	-1.66598	-1.65498
1.251	-1.3858	-1.16421	-1.14203	-1.90637	-1.65807	-1.64713
1.252	-1.3816	-1.1598	-1.13877	-1.8988	-1.65024	-1.63938
1.253	-1.37746	-1.15526	-1.13526	-1.89115	-1.64246	-1.63179
1.254	-1.3734	-1.15059	-1.13138	-1.88343	-1.63466	-1.62431
1.255	-1.36929	-1.14595	-1.12723	-1.87566	-1.62682	-1.61695
1.256	-1.36493	-1.14154	-1.12292	-1.86789	-1.619	-1.60976
1.257	-1.36021	-1.13739	-1.11848	-1.86016	-1.61126	-1.60282
1.258	-1.35524	-1.1334	-1.11392	-1.85248	-1.6036	-1.59614
1.259	-1.35012	-1.12953	-1.10929	-1.84475	-1.59601	-1.58963
1.26	-1.34483	-1.12571	-1.1047	-1.83703	-1.58846	-1.58316
1.261	-1.3393	-1.12185	-1.10023	-1.82947	-1.58096	-1.57663
1.262	-1.33358	-1.11786	-1.09597	-1.82224	-1.57354	-1.57002
1.263	-1.32789	-1.11366	-1.0919	-1.81532	-1.56625	-1.56323
1.264	-1.32247	-1.10914	-1.08787	-1.8085	-1.55918	-1.55616
1.265	-1.31737	-1.10431	-1.0837	-1.80158	-1.55237	-1.54875
1.266	-1.31252	-1.09925	-1.07933	-1.79452	-1.54572	-1.54101
1.267	-1.30784	-1.09414	-1.07479	-1.78733	-1.5391	-1.53311
1.268	-1.30327	-1.08916	-1.07016	-1.77997	-1.53249	-1.52545
1.269	-1.29882	-1.08436	-1.06541	-1.77235	-1.52588	-1.51831
1.27	-1.29449	-1.07961	-1.06049	-1.76447	-1.51928	-1.51177
1.271	-1.29023	-1.07478	-1.05543	-1.7563	-1.51261	-1.50575
1.272	-1.28588	-1.06989	-1.05035	-1.74791	-1.50572	-1.50004
1.273	-1.28133	-1.06494	-1.04537	-1.7394	-1.49857	-1.49432
1.274	-1.27659	-1.05992	-1.04055	-1.7308	-1.49128	-1.48839
1.275	-1.27177	-1.05488	-1.03599	-1.72223	-1.484	-1.48225
1.276	-1.26689	-1.04985	-1.03182	-1.71384	-1.47681	-1.47596
1.277	-1.26185	-1.04482	-1.02798	-1.70572	-1.46983	-1.46948
1.278	-1.25666	-1.03988	-1.0244	-1.69795	-1.46315	-1.46276
1.279	-1.25143	-1.03518	-1.02103	-1.69055	-1.4568	-1.45583
1.28	-1.24628	-1.03074	-1.01786	-1.68346	-1.45073	-1.44879
1.281	-1.24128	-1.02642	-1.01482	-1.67654	-1.44485	-1.4418
1.282	-1.23637	-1.02205	-1.01186	-1.66969	-1.43896	-1.43497
1.283	-1.23148	-1.0176	-1.00901	-1.66286	-1.43286	-1.42836
1.284	-1.22673	-1.0132	-1.00635	-1.65605	-1.42643	-1.42198
1.285	-1.22229	-1.00907	-1.00395	-1.64925	-1.41972	-1.41578
1.286	-1.21812	-1.00535	-1.00182	-1.64237	-1.41283	-1.40966
1.287	-1.21407	-1.00204	-0.999827	-1.63529	-1.40578	-1.40349
1.288	-1.21002	-0.998948	-0.997702	-1.62807	-1.39859	-1.39717
1.289	-1.2059	-0.995816	-0.995246	-1.62073	-1.39146	-1.3907
1.29	-1.20161	-0.992569	-0.992428	-1.61324	-1.38457	-1.38413
1.291	-1.19719	-0.989329	-0.989292	-1.60563	-1.37791	-1.37753
1.292	-1.19292	-0.986206	-0.985953	-1.59804	-1.37134	-1.37099
1.293	-1.18892	-0.983196	-0.982567	-1.59054	-1.36473	-1.36459
1.294	-1.18503	-0.98011	-0.979139	-1.58311	-1.35813	-1.35837
1.295	-1.1811	-0.976687	-0.975609	-1.57578	-1.35166	-1.35229
1.296	-1.17719	-0.972851	-0.972008	-1.56867	-1.34543	-1.34626
1.297	-1.17334	-0.968725	-0.968279	-1.56198	-1.33946	-1.34017
1.298	-1.16958	-0.964552	-0.964289	-1.55574	-1.3337	-1.33396
1.299	-1.16594	-0.960645	-0.960064	-1.54974	-1.32814	-1.32766
1.3	-1.16246	-0.957243	-0.955849	-1.54379	-1.32274	-1.3214
1.301	-1.15903	-0.954396	-0.951999	-1.53795	-1.31738	-1.31524
1.302	-1.15551	-0.951998	-0.94874	-1.53233	-1.31189	-1.30923
1.303	-1.15192	-0.949868	-0.945969	-1.52681	-1.30617	-1.30341
1.304	-1.14834	-0.947771	-0.943328	-1.5212	-1.30029	-1.29776
1.305	-1.14473	-0.94548	-0.940493	-1.51545	-1.29435	-1.29221
1.306	-1.14097	-0.942814	-0.937408	-1.50969	-1.28839	-1.28673
1.307	-1.13708	-0.939652	-0.934224	-1.50399	-1.28242	-1.28133
1.308	-1.13315	-0.935997	-0.931115	-1.49822	-1.27652	-1.27602
1.309	-1.12918	-0.931941	-0.928203	-1.49222	-1.27072	-1.27073
1.31	-1.12513	-0.927579	-0.925555	-1.48589	-1.26506	-1.26545
1.311	-1.12096	-0.922974	-0.923236	-1.47927	-1.25951	-1.26031
1.312	-1.11671	-0.918189	-0.921264	-1.47249	-1.25401	-1.25533
1.313	-1.11233	-0.913336	-0.91948	-1.4657	-1.24849	-1.25036
1.314	-1.10776	-0.908628	-0.917557	-1.45884	-1.24295	-1.24527
1.315	-1.10303	-0.904314	-0.915191	-1.45184	-1.23742	-1.24002
1.316	-1.09818	-0.900463	-0.912243	-1.44469	-1.2319	-1.23458
1.317	-1.09321	-0.896951	-0.908839	-1.43755	-1.22635	-1.22895
1.318	-1.08821	-0.893685	-0.905291	-1.43062	-1.22083	-1.22317
1.319	-1.08325	-0.890664	-0.901791	-1.42401	-1.21531	-1.21723
1.32	-1.0783	-0.887915	-0.898357	-1.41771	-1.20966	-1.2112
1.321	-1.07323	-0.885394	-0.894965	-1.41165	-1.20385	-1.20521
1.322	-1.06796	-0.882947	-0.891517	-1.40573	-1.198	-1.19926
1.323	-1.06249	-0.880416	-0.887904	-1.4	-1.19217	-1.19335
1.324	-1.05692	-0.87772	-0.884141	-1.39444	-1.18631	-1.18756
1.325	-1.0513	-0.874796	-0.880318	-1.38888	-1.18041	-1.18202
1.326	-1.04571	-0.871548	-0.876557	-1.38322	-1.17459	-1.17688
1.327	-1.04042	-0.867935	-0.873009	-1.37749	-1.169	-1.1723
1.328	-1.03583	-0.864025	-0.869734	-1.3717	-1.16376	-1.16828
1.329	-1.03211	-0.859954	-0.866634	-1.36584	-1.15887	-1.16466
1.33	-1.02909	-0.855895	-0.863517	-1.3599	-1.15416	-1.16122
1.331	-1.02648	-0.852057	-0.86028	-1.35389	-1.14942	-1.15769
1.332	-1.02412	-0.848631	-0.857023	-1.34788	-1.14458	-1.15386
1.333	-1.02193	-0.84572	-0.853826	-1.34196	-1.13973	-1.14953
1.334	-1.01978	-0.84326	-0.850587	-1.33624	-1.13498	-1.14474
1.335	-1.01754	-0.841047	-0.847189	-1.33079	-1.13039	-1.1397
1.336	-1.01514	-0.83891	-0.843694	-1.3255	-1.12595	-1.13467
1.337	-1.01253	-0.836766	-0.840335	-1.32023	-1.12167	-1.12969
1.338	-1.00974	-0.834513	-0.837309	-1.3149	-1.1175	-1.12477
1.339	-1.00684	-0.832079	-0.834734	-1.30955	-1.11332	-1.11993
1.34	-1.0038	-0.829504	-0.832714	-1.30419	-1.10902	-1.1151
1.341	-1.00056	-0.826862	-0.831224	-1.29878	-1.10447	-1.11028
1.342	-0.997126	-0.824149	-0.830092	-1.29333	-1.09952	-1.10548
1.343	-0.993665	-0.821322	-0.829149	-1.28793	-1.0942	-1.10064
1.344	-0.990394	-0.81839	-0.828402	-1.28258	-1.08856	-1.0957
1.345	-0.987447	-0.815396	-0.828006	-1.2773	-1.08283	-1.09074
1.346	-0.984829	-0.812415	-0.827956	-1.27214	-1.07733	-1.08593
1.347	-0.982464	-0.809523	-0.827936	-1.2672	-1.07222	-1.08123
1.348	-0.980168	-0.806602	-0.827503	-1.26252	-1.06749	-1.0765
1.349	-0.977648	-0.803503	-0.826345	-1.25796	-1.06316	-1.07169
1.35	-0.974701	-0.80029	-0.824374	-1.25333	-1.05915	-1.06691
1.351	-0.971342	-0.797104	-0.821605	-1.24858	-1.05517	-1.06228
1.352	-0.967693	-0.794056	-0.818141	-1.24372	-1.05091	-1.05783
1.353	-0.963914	-0.791207	-0.81421	-1.23873	-1.04626	-1.05352
1.354	-0.960161	-0.788588	-0.810089	-1.23354	-1.0414	-1.04929
1.355	-0.956538	-0.786259	-0.806022	-1.22813	-1.03661	-1.04511
1.356	-0.953083	-0.78419	-0.802213	-1.22255	-1.03209	-1.041
1.357	-0.949658	-0.782215	-0.79879	-1.2169	-1.0279	-1.03704
1.358	-0.946011	-0.780224	-0.795775	-1.21135	-1.0239	-1.03325
1.359	-0.942004	-0.778162	-0.793061	-1.20592	-1.01986	-1.02953
1.36	-0.937712	-0.775888	-0.790445	-1.2005	-1.01566	-1.0258
1.361	-0.93337	-0.773304	-0.78781	-1.19508	-1.01129	-1.02203
1.362	-0.929141	-0.770545	-0.785179	-1.18981	-1.00678	-1.01812
1.363	-0.924995	-0.767818	-0.782566	-1.18479	-1.00222	-1.01397
1.364	-0.920798	-0.76513	-0.779905	-1.18003	-0.997623	-1.0095
1.365	-0.916482	-0.762313	-0.777047	-1.17552	-0.99292	-1.00478
1.366	-0.912197	-0.759252	-0.773898	-1.1712	-0.98814	-0.999979
1.367	-0.908216	-0.756022	-0.770496	-1.16702	-0.983441	-0.995322
1.368	-0.904689	-0.752845	-0.766799	-1.16291	-0.978891	-0.991
1.369	-0.901572	-0.749936	-0.762681	-1.15876	-0.974484	-0.987095
1.37	-0.898788	-0.747315	-0.758207	-1.1545	-0.970229	-0.983589
1.371	-0.896369	-0.744848	-0.753636	-1.15009	-0.966097	-0.980367
1.372	-0.894255	-0.74246	-0.749155	-1.14553	-0.962079	-0.977235
1.373	-0.892218	-0.740215	-0.744784	-1.14081	-0.95824	-0.974045
1.374	-0.890086	-0.738124	-0.740556	-1.13599	-0.954603	-0.970742
1.375	-0.887769	-0.736109	-0.73658	-1.13125	-0.951092	-0.967316
1.376	-0.885205	-0.734116	-0.732945	-1.12668	-0.947592	-0.963785
1.377	-0.882464	-0.732112	-0.72973	-1.12226	-0.94398	-0.960169
1.378	-0.879705	-0.730008	-0.727057	-1.11781	-0.940201	-0.956441
1.379	-0.877012	-0.72767	-0.724963	-1.11322	-0.936337	-0.952574
1.38	-0.874364	-0.725054	-0.723325	-1.1085	-0.932487	-0.948603
1.381	-0.871767	-0.722247	-0.722005	-1.10377	-0.928589	-0.944593
1.382	-0.869368	-0.719354	-0.720899	-1.0991	-0.924521	-0.940579
1.383	-0.867293	-0.716524	-0.719809	-1.09455	-0.920307	-0.936567
1.384	-0.865462	-0.713921	-0.718487	-1.09011	-0.916043	-0.9325
1.385	-0.863754	-0.711635	-0.716801	-1.08578	-0.911776	-0.928374
1.386	-0.862115	-0.709681	-0.714824	-1.08159	-0.907533	-0.924308
1.387	-0.860433	-0.708004	-0.712679	-1.07756	-0.903377	-0.920341
1.388	-0.85851	-0.706545	-0.710395	-1.07367	-0.899366	-0.916383
1.389	-0.856249	-0.705313	-0.707965	-1.06988	-0.895472	-0.912393
1.39	-0.853736	-0.70435	-0.705303	-1.06611	-0.891672	-0.908386
1.391	-0.851047	-0.703652	-0.702298	-1.06221	-0.888057	-0.9044
1.392	-0.848168	-0.703046	-0.699073	-1.0582	-0.88469	-0.900485
1.393	-0.845139	-0.702198	-0.695904	-1.05421	-0.881547	-0.896663
1.394	-0.842047	-0.700843	-0.692947	-1.05034	-0.878549	-0.892938
1.395	-0.838984	-0.698871	-0.69025	-1.0465	-0.875549	-0.889319
1.396	-0.836093	-0.696216	-0.687822	-1.04251	-0.872432	-0.885758
1.397	-0.833468	-0.692904	-0.685536	-1.0382	-0.8692	-0.882105
1.398	-0.831005	-0.689179	-0.683161	-1.03362	-0.865955	-0.878281
1.399	-0.828499	-0.685327	-0.680631	-1.02898	-0.86276	-0.874412
1.4	-0.825886	-0.681515	-0.678085	-1.02441	-0.859562	-0.870645
1.401	-0.823303	-0.677921	-0.675651	-1.01991	-0.856295	-0.866989
1.402	-0.820858	-0.674791	-0.673308	-1.01545	-0.852944	-0.86345
1.403	-0.818444	-0.672184	-0.670902	-1.01102	-0.849504	-0.860115
1.404	-0.815831	-0.66991	-0.668356	-1.00676	-0.846035	-0.856986
1.405	-0.812847	-0.667837	-0.665875	-1.00279	-0.842632	-0.853965
1.406	-0.809417	-0.666003	-0.663801	-0.999085	-0.839307	-0.850967
1.407	-0.805599	-0.664425	-0.662278	-0.995603	-0.836034	-0.84794
1.408	-0.801543	-0.663027	-0.66122	-0.992296	-0.832775	-0.84484
1.409	-0.797386	-0.661735	-0.660507	-0.989095	-0.829489	-0.841636
1.41	-0.79329	-0.660483	-0.660075	-0.985934	-0.826226	-0.838333
1.411	-0.789404	-0.659186	-0.659909	-0.982788	-0.823047	-0.834958
1.412	-0.785762	-0.65768	-0.65991	-0.979577	-0.819878	-0.831454
1.413	-0.782321	-0.655753	-0.659775	-0.976171	-0.816653	-0.827707
1.414	-0.779036	-0.653333	-0.659253	-0.972505	-0.813421	-0.823684
1.415	-0.775877	-0.650528	-0.6584	-0.968632	-0.81016	-0.819497
1.416	-0.772774	-0.64749	-0.657359	-0.964679	-0.806748	-0.815309
1.417	-0.769615	-0.644354	-0.656154	-0.960728	-0.803162	-0.811233
1.418	-0.766401	-0.641265	-0.654794	-0.956846	-0.799499	-0.807336
1.419	-0.76333	-0.638385	-0.653325	-0.953141	-0.795874	-0.803665
1.42	-0.760574	-0.635769	-0.651768	-0.949707	-0.792325	-0.800252
1.421	-0.758053	-0.633279	-0.650128	-0.946511	-0.788862	-0.797151
1.422	-0.755583	-0.630742	-0.648407	-0.943405	-0.78555	-0.794372
1.423	-0.753134	-0.628146	-0.646569	-0.940255	-0.782455	-0.791853
1.424	-0.750832	-0.625575	-0.644614	-0.93695	-0.779565	-0.789574
1.425	-0.748727	-0.623047	-0.642641	-0.933411	-0.776748	-0.787526
1.426	-0.746683	-0.62055	-0.640768	-0.929699	-0.77383	-0.785572
1.427	-0.744585	-0.6181	-0.639061	-0.925917	-0.77077	-0.783511
1.428	-0.742521	-0.615678	-0.637525	-0.92205	-0.767647	-0.781259
1.429	-0.740672	-0.613242	-0.636063	-0.918077	-0.764534	-0.778866
1.43	-0.739158	-0.610858	-0.634544	-0.914119	-0.761409	-0.776359
1.431	-0.737959	-0.608671	-0.632936	-0.910312	-0.75821	-0.773678
1.432	-0.736931	-0.606758	-0.631266	-0.906676	-0.754934	-0.770753
1.433	-0.735946	-0.605088	-0.629561	-0.903162	-0.751656	-0.767595
1.434	-0.734977	-0.603596	-0.627908	-0.899737	-0.748523	-0.764273
1.435	-0.734072	-0.602296	-0.626446	-0.896341	-0.74564	-0.760814
1.436	-0.733354	-0.60125	-0.625239	-0.892891	-0.742968	-0.757223
1.437	-0.732887	-0.600407	-0.624225	-0.889419	-0.7404	-0.753631
1.438	-0.732445	-0.599615	-0.62333	-0.886064	-0.737855	-0.750288
1.439	-0.731653	-0.59873	-0.622498	-0.882882	-0.735273	-0.74732
1.44	-0.730356	-0.597638	-0.621636	-0.879818	-0.732656	-0.744652
1.441	-0.728674	-0.596285	-0.620641	-0.876849	-0.730071	-0.74217
1.442	-0.72679	-0.594759	-0.61944	-0.874006	-0.727572	-0.73981
1.443	-0.724732	-0.593233	-0.61801	-0.87123	-0.725172	-0.737553
1.444	-0.722418	-0.591712	-0.616489	-0.868348	-0.722786	-0.735398
1.445	-0.719902	-0.590022	-0.614972	-0.865247	-0.720277	-0.733326
1.446	-0.717381	-0.588061	-0.613318	-0.861985	-0.717604	-0.731311
1.447	-0.71504	-0.585906	-0.611463	-0.858648	-0.714811	-0.729378
1.448	-0.712991	-0.583756	-0.609582	-0.855253	-0.711896	-0.727542
1.449	-0.71122	-0.581749	-0.607803	-0.851794	-0.708802	-0.725707
1.45	-0.709596	-0.579828	-0.606028	-0.848328	-0.705538	-0.723784
1.451	-0.70804	-0.577839	-0.604052	-0.844992	-0.70226	-0.721717
1.452	-0.706543	-0.575743	-0.601725	-0.841905	-0.699135	-0.719405
1.453	-0.705004	-0.573698	-0.59901	-0.839064	-0.696191	-0.716841
1.454	-0.703302	-0.571902	-0.595994	-0.836331	-0.693353	-0.714172
1.455	-0.701534	-0.570386	-0.592853	-0.833562	-0.690551	-0.711512
1.456	-0.699905	-0.568921	-0.589784	-0.830761	-0.687805	-0.708843
1.457	-0.698395	-0.567177	-0.586959	-0.827979	-0.685196	-0.706128
1.458	-0.696711	-0.564989	-0.58443	-0.82521	-0.682724	-0.703408
1.459	-0.69458	-0.562431	-0.58213	-0.822433	-0.680317	-0.700699
1.46	-0.692012	-0.559678	-0.580012	-0.819593	-0.677985	-0.697952
1.461	-0.689243	-0.55691	-0.578124	-0.816626	-0.675765	-0.695155
1.462	-0.686476	-0.554291	-0.576538	-0.813537	-0.673606	-0.692384
1.463	-0.683715	-0.551874	-0.575279	-0.810343	-0.671453	-0.689678
1.464	-0.68095	-0.549614	-0.574352	-0.807048	-0.669289	-0.686981
1.465	-0.678349	-0.547479	-0.573675	-0.803807	-0.667086	-0.684216
1.466	-0.676039	-0.545484	-0.573069	-0.800856	-0.664837	-0.681349
1.467	-0.673976	-0.543753	-0.572433	-0.79824	-0.662584	-0.678392
1.468	-0.672037	-0.54246	-0.571704	-0.79584	-0.660396	-0.675368
1.469	-0.67004	-0.54169	-0.570693	-0.793568	-0.658356	-0.672319
1.47	-0.667782	-0.541346	-0.569202	-0.791428	-0.656422	-0.669349
1.471	-0.665121	-0.541161	-0.56722	-0.789437	-0.654406	-0.666567
1.472	-0.662053	-0.540922	-0.564857	-0.787541	-0.652217	-0.664056
1.473	-0.658692	-0.540532	-0.562228	-0.785665	-0.649889	-0.661822
1.474	-0.655177	-0.539873	-0.559463	-0.78368	-0.647435	-0.659784
1.475	-0.651623	-0.538805	-0.556706	-0.781417	-0.644873	-0.657838
1.476	-0.64816	-0.537269	-0.554066	-0.778794	-0.642272	-0.655931
1.477	-0.644944	-0.535352	-0.55164	-0.775792	-0.639715	-0.654025
1.478	-0.642139	-0.533222	-0.549533	-0.772443	-0.637264	-0.652069
1.479	-0.639825	-0.531002	-0.547732	-0.768872	-0.634956	-0.65003
1.48	-0.63804	-0.528791	-0.546076	-0.76516	-0.632805	-0.647915
1.481	-0.636853	-0.526737	-0.544505	-0.761347	-0.630796	-0.645798
1.482	-0.636216	-0.524963	-0.543184	-0.757579	-0.62886	-0.643766
1.483	-0.635935	-0.523438	-0.54225	-0.754051	-0.626849	-0.641805
1.484	-0.63581	-0.522033	-0.541625	-0.750833	-0.624671	-0.639822
1.485	-0.635652	-0.520766	-0.541149	-0.747905	-0.622394	-0.637698
1.486	-0.635252	-0.519791	-0.540708	-0.745242	-0.620131	-0.635394
1.487	-0.634386	-0.519105	-0.540214	-0.742751	-0.617895	-0.632985
1.488	-0.632916	-0.518533	-0.53965	-0.740258	-0.615619	-0.630573
1.489	-0.630911	-0.517922	-0.538993	-0.737633	-0.613168	-0.628167
1.49	-0.628571	-0.517189	-0.538028	-0.734818	-0.610399	-0.625685
1.491	-0.626013	-0.516273	-0.536525	-0.731842	-0.607341	-0.623096
1.492	-0.623211	-0.51504	-0.534536	-0.72876	-0.604189	-0.62045
1.493	-0.620207	-0.513401	-0.532328	-0.725559	-0.601137	-0.617764
1.494	-0.617188	-0.511523	-0.530128	-0.722254	-0.59837	-0.615077
1.495	-0.614293	-0.509652	-0.528029	-0.718986	-0.595984	-0.612492
1.496	-0.611555	-0.507828	-0.526094	-0.715868	-0.593914	-0.610117
1.497	-0.608993	-0.505936	-0.524394	-0.712816	-0.592057	-0.60798
1.498	-0.606632	-0.503974	-0.522893	-0.70976	-0.590308	-0.606007
1.499	-0.604498	-0.5021	-0.52145	-0.706854	-0.588557	-0.604131
1.5	-0.602578	-0.500392	-0.519939	-0.704281	-0.586769	-0.602283
1.501	-0.600793	-0.498828	-0.518266	-0.702063	-0.584918	-0.600318
1.502	-0.599042	-0.497431	-0.516381	-0.700079	-0.582962	-0.598144
1.503	-0.597183	-0.496217	-0.514305	-0.698113	-0.580937	-0.595788
1.504	-0.595114	-0.49509	-0.512124	-0.696009	-0.578942	-0.59329
1.505	-0.592899	-0.493976	-0.509979	-0.693772	-0.577048	-0.590685
1.506	-0.59063	-0.492938	-0.507999	-0.69145	-0.575243	-0.588012
1.507	-0.58831	-0.492009	-0.506248	-0.689007	-0.57345	-0.585324
1.508	-0.586004	-0.491094	-0.504826	-0.686414	-0.571614	-0.582731
1.509	-0.583917	-0.490059	-0.503876	-0.683785	-0.569712	-0.580258
1.51	-0.582255	-0.488769	-0.503442	-0.681307	-0.567708	-0.577826
1.511	-0.581097	-0.487126	-0.503439	-0.679077	-0.56552	-0.575416
1.512	-0.580333	-0.485146	-0.503641	-0.67714	-0.563086	-0.57309
1.513	-0.579729	-0.482961	-0.503717	-0.675538	-0.560495	-0.57089
1.514	-0.579149	-0.480725	-0.503455	-0.674238	-0.557955	-0.568829
1.515	-0.57861	-0.478601	-0.502866	-0.673145	-0.555588	-0.566927
1.516	-0.578048	-0.476708	-0.501981	-0.672134	-0.553365	-0.565185
1.517	-0.577277	-0.475009	-0.500679	-0.671058	-0.551212	-0.563518
1.518	-0.576162	-0.473388	-0.498869	-0.669777	-0.549083	-0.561803
1.519	-0.574634	-0.471803	-0.496686	-0.668232	-0.546983	-0.559999
1.52	-0.572706	-0.470367	-0.4943	-0.666481	-0.54498	-0.558137
1.521	-0.570498	-0.469263	-0.49177	-0.664636	-0.543163	-0.556233
1.522	-0.568028	-0.468496	-0.489233	-0.662741	-0.541537	-0.554287
1.523	-0.565156	-0.467821	-0.486931	-0.660713	-0.540028	-0.552249
1.524	-0.561878	-0.466931	-0.484984	-0.658492	-0.538605	-0.550024
1.525	-0.55847	-0.465685	-0.483407	-0.656132	-0.537287	-0.547648
1.526	-0.55527	-0.464183	-0.48228	-0.653613	-0.536098	-0.54535
1.527	-0.552437	-0.462644	-0.481681	-0.650818	-0.53499	-0.543346
1.528	-0.550032	-0.461218	-0.481556	-0.64777	-0.533899	-0.541686
1.529	-0.548263	-0.459929	-0.481695	-0.644623	-0.532789	-0.540346
1.53	-0.547308	-0.458709	-0.481818	-0.641481	-0.531601	-0.539297
1.531	-0.546964	-0.457458	-0.481704	-0.638417	-0.530287	-0.53845
1.532	-0.546825	-0.45618	-0.481315	-0.635546	-0.528839	-0.537664
1.533	-0.54666	-0.454995	-0.48073	-0.632931	-0.527227	-0.536765
1.534	-0.54644	-0.453941	-0.480036	-0.630508	-0.525432	-0.535584
1.535	-0.546212	-0.452914	-0.479286	-0.628161	-0.523477	-0.534116
1.536	-0.546037	-0.451864	-0.478476	-0.625796	-0.521363	-0.532519
1.537	-0.545916	-0.450796	-0.477537	-0.623341	-0.519084	-0.530921
1.538	-0.545663	-0.449626	-0.476362	-0.620792	-0.516686	-0.529331
1.539	-0.545003	-0.448293	-0.474863	-0.61821	-0.514302	-0.527716
1.54	-0.543829	-0.446875	-0.473033	-0.615689	-0.512026	-0.526043
1.541	-0.542211	-0.445387	-0.470935	-0.613331	-0.509763	-0.524279
1.542	-0.540276	-0.443783	-0.468747	-0.611148	-0.507426	-0.522409
1.543	-0.538198	-0.442219	-0.46666	-0.609086	-0.505132	-0.520432
1.544	-0.536162	-0.440947	-0.464714	-0.607209	-0.503013	-0.518351
1.545	-0.534236	-0.440093	-0.462906	-0.605609	-0.501098	-0.516125
1.546	-0.532332	-0.439689	-0.461255	-0.604257	-0.499439	-0.513738
1.547	-0.530391	-0.43959	-0.459696	-0.603019	-0.498138	-0.511299
1.548	-0.52859	-0.439336	-0.458092	-0.601691	-0.497159	-0.508925
1.549	-0.5272	-0.438332	-0.456417	-0.600193	-0.496321	-0.506655
1.55	-0.526222	-0.436258	-0.454782	-0.598663	-0.495461	-0.504526
1.551	-0.525433	-0.43326	-0.453318	-0.597199	-0.494519	-0.50264
1.552	-0.524655	-0.429781	-0.452074	-0.595778	-0.493497	-0.501125
1.553	-0.523714	-0.426283	-0.450978	-0.594397	-0.492296	-0.500008
1.554	-0.522457	-0.423172	-0.44989	-0.593084	-0.490754	-0.499198
1.555	-0.520895	-0.420829	-0.448644	-0.591862	-0.488845	-0.498533
1.556	-0.519166	-0.419459	-0.447058	-0.590705	-0.486707	-0.497795
1.557	-0.517431	-0.418965	-0.445076	-0.589539	-0.484544	-0.496823
1.558	-0.515802	-0.419085	-0.442803	-0.588262	-0.482529	-0.495607
1.559	-0.514316	-0.419564	-0.44031	-0.586791	-0.480782	-0.494257
1.56	-0.512968	-0.420123	-0.437608	-0.585088	-0.479361	-0.492864
1.561	-0.511663	-0.420456	-0.434804	-0.583146	-0.478204	-0.491437
1.562	-0.51022	-0.420467	-0.432105	-0.581007	-0.477218	-0.48998
1.563	-0.50857	-0.42033	-0.429671	-0.578713	-0.476328	-0.488464
1.564	-0.50683	-0.420235	-0.427456	-0.576251	-0.475415	-0.486805
1.565	-0.505182	-0.420203	-0.425281	-0.5736	-0.474399	-0.484988
1.566	-0.503734	-0.4201	-0.423071	-0.570855	-0.473312	-0.483116
1.567	-0.502364	-0.419763	-0.420831	-0.568206	-0.472211	-0.481337
1.568	-0.500745	-0.419157	-0.418561	-0.565754	-0.471066	-0.47978
1.569	-0.498664	-0.41839	-0.416362	-0.56349	-0.469777	-0.478531
1.57	-0.496221	-0.417592	-0.414446	-0.561398	-0.468246	-0.477535
1.571	-0.493696	-0.416798	-0.412914	-0.559547	-0.466447	-0.47656
1.572	-0.49137	-0.415905	-0.411757	-0.558084	-0.464486	-0.47543
1.573	-0.489444	-0.414826	-0.411034	-0.556958	-0.462508	-0.474095
1.574	-0.487977	-0.413576	-0.410768	-0.555878	-0.4606	-0.472564
1.575	-0.486895	-0.412093	-0.410841	-0.554573	-0.458787	-0.470916
1.576	-0.486076	-0.410283	-0.411152	-0.552965	-0.457066	-0.469215
1.577	-0.485463	-0.408258	-0.411743	-0.551148	-0.455502	-0.46749
1.578	-0.485057	-0.406293	-0.412701	-0.54928	-0.454157	-0.465807
1.579	-0.484832	-0.404622	-0.413959	-0.54747	-0.452937	-0.464222
1.58	-0.484742	-0.403342	-0.415326	-0.545742	-0.451699	-0.462725
1.581	-0.484662	-0.402438	-0.416629	-0.544095	-0.450385	-0.461318
1.582	-0.484267	-0.401897	-0.417759	-0.54253	-0.448917	-0.459991
1.583	-0.483297	-0.401773	-0.418658	-0.541009	-0.447225	-0.458672
1.584	-0.481844	-0.402081	-0.419241	-0.539482	-0.445391	-0.457305
1.585	-0.480214	-0.402639	-0.419388	-0.537986	-0.443513	-0.455899
1.586	-0.478651	-0.403102	-0.419022	-0.536587	-0.441584	-0.454502
1.587	-0.477254	-0.403159	-0.418139	-0.535273	-0.439604	-0.453118
1.588	-0.476045	-0.402776	-0.416754	-0.533971	-0.437614	-0.451649
1.589	-0.474976	-0.402135	-0.414923	-0.532527	-0.435621	-0.450002
1.59	-0.473875	-0.401339	-0.412844	-0.530765	-0.433619	-0.448214
1.591	-0.472581	-0.400315	-0.410723	-0.528706	-0.431676	-0.446361
1.592	-0.471114	-0.398969	-0.408547	-0.526471	-0.429909	-0.444446
1.593	-0.469568	-0.39737	-0.406283	-0.52417	-0.428378	-0.442501
1.594	-0.467929	-0.395739	-0.404132	-0.521935	-0.427054	-0.440641
1.595	-0.466164	-0.39427	-0.402324	-0.519764	-0.425835	-0.438969
1.596	-0.464405	-0.392964	-0.400859	-0.517563	-0.424624	-0.437514
1.597	-0.462868	-0.391641	-0.399555	-0.515408	-0.423432	-0.436191
1.598	-0.461679	-0.390183	-0.398243	-0.513471	-0.422266	-0.434839
1.599	-0.46089	-0.388653	-0.396868	-0.511772	-0.42104	-0.433301
1.6	-0.460556	-0.387141	-0.395481	-0.510261	-0.419763	-0.431513
1.601	-0.460674	-0.385669	-0.394229	-0.508929	-0.418615	-0.429546
1.602	-0.461081	-0.384272	-0.393311	-0.507759	-0.417726	-0.427552
1.603	-0.461452	-0.383059	-0.392813	-0.506719	-0.417045	-0.425701
1.604	-0.461506	-0.382132	-0.392558	-0.50579	-0.416452	-0.424105
1.605	-0.46119	-0.381457	-0.392304	-0.504899	-0.415853	-0.422756
1.606	-0.460537	-0.380898	-0.39198	-0.503903	-0.415226	-0.421513
1.607	-0.459549	-0.380443	-0.391593	-0.50267	-0.414619	-0.420193
1.608	-0.458269	-0.380186	-0.391133	-0.50118	-0.414039	-0.418773
1.609	-0.456756	-0.380049	-0.390621	-0.499557	-0.413426	-0.417445
1.61	-0.45499	-0.379815	-0.390128	-0.497975	-0.412714	-0.416351
1.611	-0.453028	-0.379327	-0.389712	-0.49649	-0.411852	-0.415419
1.612	-0.451078	-0.378427	-0.389352	-0.495012	-0.41087	-0.41452
1.613	-0.449195	-0.376899	-0.388952	-0.493393	-0.409903	-0.413648
1.614	-0.44729	-0.37466	-0.38842	-0.491589	-0.409039	-0.412928
1.615	-0.44546	-0.371895	-0.3877	-0.489719	-0.408213	-0.41247
1.616	-0.443889	-0.368949	-0.38678	-0.487957	-0.407274	-0.412269
1.617	-0.442629	-0.366167	-0.385652	-0.486423	-0.406096	-0.412232
1.618	-0.441677	-0.363834	-0.38429	-0.485149	-0.404673	-0.41225
1.619	-0.441025	-0.362093	-0.382764	-0.484075	-0.403103	-0.412231
1.62	-0.440612	-0.360894	-0.381281	-0.483087	-0.401526	-0.412095
1.621	-0.44026	-0.360185	-0.380012	-0.482058	-0.400018	-0.411831
1.622	-0.439772	-0.360033	-0.378941	-0.480931	-0.398562	-0.411494
1.623	-0.439111	-0.360422	-0.377974	-0.479766	-0.397132	-0.411048
1.624	-0.438362	-0.361156	-0.377123	-0.478599	-0.395676	-0.4103
1.625	-0.437582	-0.361965	-0.376438	-0.477284	-0.394085	-0.409111
1.626	-0.436754	-0.362637	-0.375833	-0.475664	-0.392321	-0.407559
1.627	-0.435797	-0.363145	-0.375168	-0.47383	-0.390472	-0.405833
1.628	-0.434627	-0.363555	-0.374491	-0.472021	-0.388659	-0.404068
1.629	-0.433227	-0.363812	-0.374017	-0.470424	-0.38696	-0.402338
1.63	-0.431586	-0.363686	-0.373761	-0.469129	-0.385393	-0.400732
1.631	-0.429593	-0.362975	-0.373348	-0.468058	-0.383947	-0.399273
1.632	-0.427206	-0.361733	-0.372415	-0.467022	-0.382642	-0.397864
1.633	-0.424697	-0.360192	-0.371029	-0.465948	-0.381522	-0.396436
1.634	-0.422504	-0.35855	-0.369497	-0.464903	-0.380615	-0.39499
1.635	-0.420912	-0.356921	-0.368011	-0.463894	-0.379895	-0.393516
1.636	-0.419927	-0.355437	-0.366609	-0.462823	-0.379255	-0.392012
1.637	-0.419397	-0.354214	-0.365301	-0.461566	-0.378583	-0.390519
1.638	-0.41922	-0.353301	-0.36413	-0.460052	-0.377823	-0.389087
1.639	-0.419347	-0.352712	-0.363158	-0.458315	-0.376993	-0.38768
1.64	-0.419659	-0.35234	-0.362439	-0.456478	-0.376168	-0.386216
1.641	-0.419985	-0.351929	-0.361988	-0.454683	-0.375371	-0.384688
1.642	-0.420207	-0.351272	-0.361778	-0.453017	-0.374475	-0.383186
1.643	-0.420252	-0.350322	-0.361765	-0.451502	-0.373353	-0.381836
1.644	-0.420015	-0.349097	-0.361903	-0.450064	-0.372082	-0.380705
1.645	-0.419438	-0.347621	-0.36209	-0.448604	-0.370802	-0.379719
1.646	-0.418631	-0.345944	-0.36215	-0.447137	-0.369525	-0.378753
1.647	-0.417752	-0.344181	-0.361933	-0.445688	-0.368228	-0.377789
1.648	-0.416878	-0.342477	-0.36137	-0.444181	-0.366938	-0.376848
1.649	-0.416052	-0.340909	-0.360479	-0.442584	-0.3657	-0.375866
1.65	-0.415282	-0.339525	-0.359374	-0.440965	-0.364563	-0.374776
1.651	-0.414557	-0.338441	-0.358152	-0.439445	-0.363545	-0.373564
1.652	-0.413887	-0.337802	-0.356845	-0.438154	-0.362577	-0.372225
1.653	-0.413207	-0.337716	-0.355465	-0.437121	-0.361612	-0.370801
1.654	-0.4123	-0.338167	-0.354044	-0.436268	-0.360731	-0.369419
1.655	-0.410954	-0.338932	-0.352684	-0.435553	-0.360027	-0.368235
1.656	-0.409159	-0.339701	-0.351556	-0.435008	-0.359465	-0.367337
1.657	-0.407093	-0.34026	-0.350782	-0.434653	-0.358916	-0.366698
1.658	-0.405036	-0.340523	-0.350364	-0.434394	-0.358334	-0.366224
1.659	-0.40325	-0.340429	-0.35025	-0.434081	-0.357738	-0.3658
1.66	-0.401755	-0.339917	-0.350426	-0.433667	-0.357095	-0.365345
1.661	-0.400379	-0.338967	-0.350827	-0.433133	-0.356401	-0.364855
1.662	-0.399079	-0.33761	-0.351292	-0.432396	-0.355667	-0.364395
1.663	-0.39802	-0.335886	-0.351671	-0.431428	-0.354845	-0.364037
1.664	-0.39737	-0.333745	-0.351806	-0.430308	-0.353884	-0.363748
1.665	-0.397124	-0.331084	-0.351557	-0.429095	-0.352718	-0.363389
1.666	-0.397093	-0.327987	-0.35089	-0.427749	-0.351375	-0.362866
1.667	-0.397049	-0.324838	-0.349916	-0.426249	-0.350055	-0.362144
1.668	-0.396867	-0.322103	-0.348842	-0.424677	-0.348927	-0.361171
1.669	-0.396524	-0.320092	-0.347846	-0.423173	-0.347998	-0.359911
1.67	-0.396097	-0.318896	-0.34698	-0.421795	-0.347169	-0.358434
1.671	-0.395703	-0.318487	-0.346182	-0.420435	-0.346331	-0.356879
1.672	-0.395326	-0.318805	-0.345384	-0.418905	-0.345466	-0.355389
1.673	-0.394821	-0.319694	-0.34459	-0.417123	-0.344638	-0.354042
1.674	-0.394076	-0.320913	-0.343825	-0.415205	-0.343888	-0.352853
1.675	-0.393089	-0.322246	-0.343089	-0.413381	-0.343185	-0.351827
1.676	-0.391988	-0.323487	-0.342374	-0.411848	-0.342403	-0.350933
1.677	-0.390879	-0.3244	-0.341633	-0.410717	-0.341442	-0.350108
1.678	-0.389785	-0.324811	-0.340778	-0.409951	-0.34034	-0.3493
1.679	-0.388813	-0.324683	-0.339766	-0.409334	-0.339178	-0.348501
1.68	-0.388098	-0.324149	-0.338643	-0.408586	-0.337983	-0.347728
1.681	-0.387475	-0.323436	-0.337455	-0.407585	-0.336784	-0.346889
1.682	-0.386512	-0.32272	-0.336237	-0.406427	-0.335662	-0.345843
1.683	-0.384862	-0.322081	-0.33511	-0.405272	-0.334669	-0.344526
1.684	-0.38246	-0.321505	-0.334226	-0.404217	-0.333791	-0.342966
1.685	-0.379421	-0.320948	-0.333624	-0.403273	-0.332996	-0.341283
1.686	-0.375868	-0.320341	-0.33325	-0.402346	-0.332257	-0.339586
1.687	-0.371987	-0.319566	-0.332971	-0.401327	-0.331556	-0.337935
1.688	-0.368078	-0.318599	-0.332577	-0.400158	-0.330877	-0.336379
1.689	-0.364325	-0.317485	-0.331925	-0.398787	-0.330184	-0.334979
1.69	-0.360733	-0.316174	-0.330987	-0.397186	-0.329472	-0.333816
1.691	-0.357422	-0.314675	-0.329715	-0.395434	-0.328794	-0.332915
1.692	-0.35476	-0.313196	-0.328046	-0.393678	-0.328142	-0.332188
1.693	-0.35311	-0.311962	-0.3261	-0.392072	-0.32736	-0.331582
1.694	-0.352614	-0.310986	-0.324258	-0.390716	-0.326305	-0.331239
1.695	-0.353222	-0.310137	-0.322885	-0.389634	-0.325055	-0.331281
1.696	-0.354734	-0.309404	-0.322022	-0.388855	-0.323828	-0.331594
1.697	-0.356842	-0.308935	-0.321512	-0.388384	-0.32271	-0.332009
1.698	-0.359198	-0.308829	-0.321219	-0.388073	-0.321581	-0.332423
1.699	-0.361465	-0.309057	-0.320979	-0.387791	-0.320308	-0.332747
1.7	-0.363431	-0.309486	-0.320588	-0.387553	-0.318919	-0.332902
1.701	-0.365038	-0.309939	-0.319921	-0.38732	-0.317505	-0.332799
1.702	-0.366247	-0.310251	-0.319005	-0.386935	-0.316065	-0.332323
1.703	-0.366982	-0.310286	-0.317927	-0.386331	-0.314548	-0.331387
1.704	-0.367164	-0.310052	-0.316745	-0.385569	-0.312961	-0.330082
1.705	-0.366796	-0.309706	-0.31554	-0.384699	-0.311416	-0.328643
1.706	-0.365973	-0.309371	-0.314418	-0.38372	-0.310071	-0.32723
1.707	-0.364682	-0.309042	-0.313426	-0.382676	-0.309019	-0.325861
1.708	-0.362814	-0.308652	-0.312584	-0.381642	-0.308268	-0.324517
1.709	-0.360435	-0.308074	-0.311926	-0.380646	-0.307752	-0.323198
1.71	-0.357796	-0.307106	-0.311483	-0.379661	-0.307388	-0.321902
1.711	-0.35521	-0.30549	-0.311282	-0.378594	-0.307119	-0.32061
1.712	-0.353016	-0.303001	-0.311359	-0.377395	-0.30691	-0.319286
1.713	-0.351483	-0.299552	-0.311709	-0.376101	-0.306759	-0.317951
1.714	-0.350743	-0.295219	-0.312185	-0.374767	-0.306691	-0.316683
1.715	-0.350729	-0.290258	-0.312563	-0.373479	-0.306725	-0.31552
1.716	-0.351117	-0.285148	-0.31272	-0.372358	-0.306904	-0.314472
1.717	-0.351637	-0.280547	-0.312684	-0.371438	-0.30722	-0.313605
1.718	-0.352275	-0.277073	-0.312473	-0.370667	-0.307524	-0.312991
1.719	-0.352918	-0.275037	-0.312051	-0.369933	-0.307604	-0.312599
1.72	-0.353288	-0.274464	-0.311433	-0.369128	-0.307281	-0.312294
1.721	-0.35328	-0.275284	-0.310599	-0.368305	-0.306479	-0.311946
1.722	-0.352915	-0.277238	-0.309445	-0.367551	-0.305258	-0.311508
1.723	-0.352095	-0.279819	-0.308001	-0.366755	-0.303824	-0.310973
1.724	-0.350722	-0.282508	-0.306412	-0.365776	-0.302411	-0.31039
1.725	-0.348946	-0.284962	-0.304731	-0.364711	-0.301115	-0.30988
1.726	-0.347022	-0.28702	-0.303011	-0.363742	-0.29993	-0.309542
1.727	-0.34508	-0.288567	-0.30147	-0.362877	-0.298814	-0.309363
1.728	-0.343248	-0.289448	-0.300348	-0.361993	-0.297693	-0.309228
1.729	-0.341685	-0.289636	-0.299734	-0.361054	-0.296566	-0.308964
1.73	-0.34046	-0.289383	-0.299613	-0.360145	-0.295498	-0.308435
1.731	-0.339601	-0.289024	-0.29983	-0.359306	-0.294519	-0.307633
1.732	-0.339224	-0.288675	-0.300051	-0.35849	-0.293657	-0.306668
1.733	-0.339419	-0.288299	-0.3	-0.357638	-0.29297	-0.305579
1.734	-0.340091	-0.287868	-0.299638	-0.356714	-0.292481	-0.304267
1.735	-0.340956	-0.287397	-0.299094	-0.355767	-0.292101	-0.302734
1.736	-0.341688	-0.287036	-0.298503	-0.354845	-0.291686	-0.30119
1.737	-0.342061	-0.286946	-0.297921	-0.353906	-0.291127	-0.299862
1.738	-0.341885	-0.287031	-0.297353	-0.352878	-0.290361	-0.298786
1.739	-0.341046	-0.287015	-0.296734	-0.351751	-0.289437	-0.297816
1.74	-0.339666	-0.286665	-0.295919	-0.350619	-0.288545	-0.296824
1.741	-0.337966	-0.285874	-0.294788	-0.349612	-0.287802	-0.295859
1.742	-0.336132	-0.2847	-0.293377	-0.348751	-0.287147	-0.295017
1.743	-0.33436	-0.283347	-0.291908	-0.347979	-0.286491	-0.294292
1.744	-0.332842	-0.282055	-0.290653	-0.347262	-0.285815	-0.293642
1.745	-0.33179	-0.281023	-0.289772	-0.346551	-0.285132	-0.293034
1.746	-0.331372	-0.280415	-0.289258	-0.345764	-0.284457	-0.292379
1.747	-0.331518	-0.280272	-0.288989	-0.34489	-0.283865	-0.291628
1.748	-0.331952	-0.280415	-0.288803	-0.343981	-0.283444	-0.290981
1.749	-0.332454	-0.280539	-0.288568	-0.343124	-0.283154	-0.290723
1.75	-0.332939	-0.280438	-0.288235	-0.34243	-0.282889	-0.290867
1.751	-0.333362	-0.280087	-0.28783	-0.3419	-0.28256	-0.291178
1.752	-0.33369	-0.279625	-0.287396	-0.341454	-0.282015	-0.291389
1.753	-0.333951	-0.279266	-0.286957	-0.341024	-0.281147	-0.291301
1.754	-0.334192	-0.279099	-0.286439	-0.340485	-0.28012	-0.290863
1.755	-0.334388	-0.279051	-0.285741	-0.33975	-0.279142	-0.29018
1.756	-0.334401	-0.279039	-0.284928	-0.3389	-0.278241	-0.289384
1.757	-0.334004	-0.27899	-0.284164	-0.338062	-0.277398	-0.288546
1.758	-0.333029	-0.278796	-0.283529	-0.337289	-0.276571	-0.287696
1.759	-0.331499	-0.278367	-0.283162	-0.336561	-0.275642	-0.286825
1.76	-0.329571	-0.277696	-0.283219	-0.335829	-0.274534	-0.285897
1.761	-0.327411	-0.276834	-0.283635	-0.335119	-0.273303	-0.284912
1.762	-0.325169	-0.275806	-0.284198	-0.3345	-0.272078	-0.283933
1.763	-0.323004	-0.274648	-0.284767	-0.333882	-0.270991	-0.283003
1.764	-0.321104	-0.273475	-0.285343	-0.333098	-0.270175	-0.282143
1.765	-0.319592	-0.272425	-0.285964	-0.332136	-0.269649	-0.281415
1.766	-0.318461	-0.271489	-0.286525	-0.331125	-0.269292	-0.28084
1.767	-0.317649	-0.270517	-0.286798	-0.330187	-0.269064	-0.280358
1.768	-0.317061	-0.269509	-0.286695	-0.329356	-0.268996	-0.27993
1.769	-0.316584	-0.268668	-0.286368	-0.328645	-0.269037	-0.279544
1.77	-0.316225	-0.26811	-0.286035	-0.328062	-0.269054	-0.279158
1.771	-0.31603	-0.267819	-0.285817	-0.327517	-0.268892	-0.278693
1.772	-0.315836	-0.267825	-0.285674	-0.326817	-0.268499	-0.278117
1.773	-0.315468	-0.268166	-0.285485	-0.325753	-0.267932	-0.277471
1.774	-0.315012	-0.268657	-0.285201	-0.324287	-0.267185	-0.276827
1.775	-0.314596	-0.268955	-0.284904	-0.322563	-0.2662	-0.276194
1.776	-0.314178	-0.268911	-0.284697	-0.320717	-0.265007	-0.275507
1.777	-0.313748	-0.268684	-0.284635	-0.318827	-0.263735	-0.27474
1.778	-0.313455	-0.268464	-0.284727	-0.316968	-0.262562	-0.273951
1.779	-0.313486	-0.268251	-0.284878	-0.315233	-0.261649	-0.27323
1.78	-0.313938	-0.268062	-0.284948	-0.313716	-0.261004	-0.272617
1.781	-0.314633	-0.268057	-0.284894	-0.312537	-0.260537	-0.272044
1.782	-0.315186	-0.268279	-0.284699	-0.311886	-0.260226	-0.27148
1.783	-0.31532	-0.268522	-0.284283	-0.311839	-0.260097	-0.271012
1.784	-0.314945	-0.268566	-0.283635	-0.312243	-0.260153	-0.2707
1.785	-0.314171	-0.268381	-0.282853	-0.31289	-0.260386	-0.270464
1.786	-0.313274	-0.268051	-0.281918	-0.313589	-0.260708	-0.270108
1.787	-0.312464	-0.267501	-0.280563	-0.314093	-0.260922	-0.269513
1.788	-0.311795	-0.266463	-0.278659	-0.314134	-0.260804	-0.268733
1.789	-0.311251	-0.264736	-0.276539	-0.313642	-0.260171	-0.267783
1.79	-0.310758	-0.262318	-0.274642	-0.312759	-0.25896	-0.266634
1.791	-0.310207	-0.259312	-0.27307	-0.31164	-0.257278	-0.265361
1.792	-0.309474	-0.255861	-0.27171	-0.310372	-0.255389	-0.264078
1.793	-0.308479	-0.252248	-0.27057	-0.309064	-0.253613	-0.262829
1.794	-0.307215	-0.248951	-0.269779	-0.307818	-0.252162	-0.261621
1.795	-0.305735	-0.246423	-0.26935	-0.30664	-0.251061	-0.260456
1.796	-0.304192	-0.244788	-0.269121	-0.305467	-0.250206	-0.259337
1.797	-0.302782	-0.243867	-0.26893	-0.304306	-0.249494	-0.258236
1.798	-0.301623	-0.24345	-0.268697	-0.303248	-0.248803	-0.257095
1.799	-0.300784	-0.243412	-0.268335	-0.302369	-0.248045	-0.255896
1.8	-0.30031	-0.243662	-0.267772	-0.301726	-0.247295	-0.254669
1.801	-0.300168	-0.244095	-0.267051	-0.301312	-0.246641	-0.25343
1.802	-0.300196	-0.244581	-0.266268	-0.301047	-0.246037	-0.252216
1.803	-0.300148	-0.245098	-0.265429	-0.300993	-0.245438	-0.251157
1.804	-0.299849	-0.245719	-0.26446	-0.301272	-0.24488	-0.250427
1.805	-0.299235	-0.246418	-0.263368	-0.301775	-0.244395	-0.250112
1.806	-0.298269	-0.247123	-0.26231	-0.3022	-0.243937	-0.250109
1.807	-0.296978	-0.247913	-0.261497	-0.302247	-0.243434	-0.250196
1.808	-0.295451	-0.248864	-0.261002	-0.301773	-0.242828	-0.250264
1.809	-0.293796	-0.249822	-0.260741	-0.30087	-0.242157	-0.250369
1.81	-0.292126	-0.250521	-0.260647	-0.299705	-0.241587	-0.250553
1.811	-0.290521	-0.250763	-0.260721	-0.298362	-0.241262	-0.250793
1.812	-0.289099	-0.250449	-0.261029	-0.296866	-0.241215	-0.251071
1.813	-0.288059	-0.249624	-0.261567	-0.295256	-0.241399	-0.251385
1.814	-0.287563	-0.248489	-0.262167	-0.293656	-0.241757	-0.251711
1.815	-0.287609	-0.247307	-0.262604	-0.292216	-0.242268	-0.25194
1.816	-0.288013	-0.246262	-0.262676	-0.291008	-0.242883	-0.251955
1.817	-0.288571	-0.245386	-0.262344	-0.290033	-0.243436	-0.25173
1.818	-0.289122	-0.244651	-0.261744	-0.289249	-0.243758	-0.251273
1.819	-0.289483	-0.244078	-0.260972	-0.288501	-0.243825	-0.250561
1.82	-0.289518	-0.243632	-0.259977	-0.28763	-0.24364	-0.249642
1.821	-0.289204	-0.243159	-0.258723	-0.286696	-0.243061	-0.248617
1.822	-0.288583	-0.24257	-0.257389	-0.285879	-0.241944	-0.247528
1.823	-0.287772	-0.241993	-0.256229	-0.285233	-0.240342	-0.246424
1.824	-0.286891	-0.241653	-0.255317	-0.284662	-0.238475	-0.245412
1.825	-0.285978	-0.241701	-0.254593	-0.284049	-0.236548	-0.244563
1.826	-0.285064	-0.24219	-0.253971	-0.283343	-0.234695	-0.243878
1.827	-0.284248	-0.242991	-0.253406	-0.282575	-0.233058	-0.243323
1.828	-0.283607	-0.243741	-0.252918	-0.281841	-0.231788	-0.242839
1.829	-0.283088	-0.244053	-0.252538	-0.281207	-0.23097	-0.242335
1.83	-0.282627	-0.243822	-0.252294	-0.280631	-0.230587	-0.241724
1.831	-0.282303	-0.243285	-0.252135	-0.280007	-0.23052	-0.240979
1.832	-0.282227	-0.242787	-0.251905	-0.279314	-0.230606	-0.240163
1.833	-0.282442	-0.24256	-0.251513	-0.278704	-0.230757	-0.239373
1.834	-0.282929	-0.242709	-0.250991	-0.278372	-0.230959	-0.238675
1.835	-0.28357	-0.243212	-0.250362	-0.278415	-0.231149	-0.238075
1.836	-0.284126	-0.243841	-0.249571	-0.278807	-0.231201	-0.237497
1.837	-0.284243	-0.244271	-0.24845	-0.279358	-0.231003	-0.236879
1.838	-0.283591	-0.244334	-0.246812	-0.279847	-0.230552	-0.236319
1.839	-0.282089	-0.244103	-0.244666	-0.280226	-0.230014	-0.235949
1.84	-0.279931	-0.243769	-0.242168	-0.280485	-0.229563	-0.235699
1.841	-0.277404	-0.24346	-0.239459	-0.280529	-0.229176	-0.23536
1.842	-0.274818	-0.24315	-0.236741	-0.280288	-0.228705	-0.234833
1.843	-0.272491	-0.242705	-0.234305	-0.279776	-0.228079	-0.234205
1.844	-0.27069	-0.241908	-0.232346	-0.279126	-0.227334	-0.233583
1.845	-0.269595	-0.240617	-0.230912	-0.278528	-0.226559	-0.233052
1.846	-0.269253	-0.23896	-0.22999	-0.278045	-0.225858	-0.23268
1.847	-0.269509	-0.23726	-0.22958	-0.277597	-0.225272	-0.232472
1.848	-0.270111	-0.235817	-0.229626	-0.277126	-0.224742	-0.232342
1.849	-0.270862	-0.234788	-0.229851	-0.276636	-0.224141	-0.232098
1.85	-0.271607	-0.234197	-0.229861	-0.276086	-0.223277	-0.231613
1.851	-0.272179	-0.233986	-0.229496	-0.275428	-0.222066	-0.231027
1.852	-0.272463	-0.23402	-0.228891	-0.274692	-0.220696	-0.230523
1.853	-0.27243	-0.234107	-0.228294	-0.273992	-0.219407	-0.230057
1.854	-0.272159	-0.234136	-0.227883	-0.273425	-0.218374	-0.229528
1.855	-0.271817	-0.234162	-0.227744	-0.272964	-0.21775	-0.228965
1.856	-0.27152	-0.234193	-0.22793	-0.2725	-0.217542	-0.228416
1.857	-0.271276	-0.234042	-0.228352	-0.271937	-0.217586	-0.227881
1.858	-0.271035	-0.233587	-0.228805	-0.271243	-0.217723	-0.22741
1.859	-0.27074	-0.232962	-0.229292	-0.270446	-0.217847	-0.227096
1.86	-0.270392	-0.232378	-0.230034	-0.269539	-0.217902	-0.226947
1.861	-0.270097	-0.231895	-0.231069	-0.268467	-0.217886	-0.226899
1.862	-0.270009	-0.231322	-0.23209	-0.267216	-0.217778	-0.226911
1.863	-0.270207	-0.230359	-0.232813	-0.265817	-0.217582	-0.226961
1.864	-0.270641	-0.228948	-0.233216	-0.264371	-0.217367	-0.226994
1.865	-0.271212	-0.227322	-0.233365	-0.263011	-0.217131	-0.226935
1.866	-0.271785	-0.225707	-0.233319	-0.261769	-0.216799	-0.226744
1.867	-0.272227	-0.224215	-0.233185	-0.260633	-0.216356	-0.226482
1.868	-0.272483	-0.222967	-0.233063	-0.259663	-0.215862	-0.226181
1.869	-0.272604	-0.222149	-0.232943	-0.258928	-0.215444	-0.225748
1.87	-0.272694	-0.221918	-0.23267	-0.258414	-0.215203	-0.225157
1.871	-0.272779	-0.222297	-0.23208	-0.258087	-0.215095	-0.224518
1.872	-0.272824	-0.223216	-0.231166	-0.257946	-0.214995	-0.223898
1.873	-0.272778	-0.22455	-0.230108	-0.257956	-0.214895	-0.223302
1.874	-0.272572	-0.226076	-0.229105	-0.257998	-0.214854	-0.222691
1.875	-0.272161	-0.227433	-0.22819	-0.257947	-0.214779	-0.221991
1.876	-0.271594	-0.228214	-0.227324	-0.257788	-0.214471	-0.221148
1.877	-0.271025	-0.228158	-0.226531	-0.257556	-0.213853	-0.220175
1.878	-0.270539	-0.22727	-0.225894	-0.257249	-0.213028	-0.219179
1.879	-0.270042	-0.225866	-0.225522	-0.256882	-0.212198	-0.218294
1.88	-0.269433	-0.224449	-0.225501	-0.256555	-0.211496	-0.217528
1.881	-0.268753	-0.22337	-0.225819	-0.256377	-0.210898	-0.216788
[truncated: 1,118 more rows]

## Sheet: WT_ph7.3_surfer_traces
time (s)	current (nA)
[truncated: 3,000 more rows]

## Sheet: WT_pH7.7_surfer_traces
time (s)	current (nA)
[truncated: 3,000 more rows]

## Sheet: WT_pH8.3_surfer_traces
time (s)	current (nA)
[truncated: 3,000 more rows]

[truncated: 20 more sheets: WT_pH8.6_surfer_traces, T75D_pH5.9_surfer_traces, T75D_pH6.4_surfer_traces, T75D_pH6.9_surfer_traces, T75D_pH7.3_surfer_traces, T75D_pH7.7_surfer_traces, T75D_pH8.3_surfer_traces, T75D_pH8.6_surfer_traces, KdpB_T75K_100K_s2-0006, T75K_pH7.3_surfer_traces, T75K_pH7.7_surfer_traces, T75K_pH8.3_surfer_traces, T75K_pH8.8_surfer_traces, L72D_pH5.9_surfer_traces, L72D_pH6.4_surfer_traces, L72D_pH6.9_surfer_traces, L72D_pH7.3_surfer_traces, L72D_pH7.7_surfer_traces, L72D_pH8.3_surfer_traces, L72D_pH8.6_surfer_traces]
