# Supplementary material for: Conduction pathway for potassium through the Escherichia coli pump KdpFABC
Source: eLife. 2025 Nov 19;14:RP107397. doi: 10.7554/eLife.107397 (PMC12629597; doi:10.7554/eLife.107397)
Supplement: Figure 6—source data 1. [file elife-107397-fig6-data1.xlsx]

## Sheet: fig6C_WT
		ATPase activity @0.1 mM K												transport @ 100 mM K
pH	ATPase activity (µmol Pi/mg/min)													pH	current (nA)
	1	2	3	4	5	6								5.9	1.177	1.187	1.166	0.824	0.805	0.801
5.6	1.5378	0.8184	1.0988	1.0421	0.7978	0.7904
5.9	1.3074	1.7779	1.8263	1.529	1.7463	1.5846								6.4	1.877	1.573	1.611	1.322	0.978	1.1103
6.2	3.275	2.1282	3.0981	2.855	3.3532	3.6984
6.4	3.8854	3.6037	3.9871	3.8761	4.2532	4.3702								6.9	1.841	1.577	1.55	1.342	1.1139	1.118
6.6	6.3968	5.8085	1.1271*	7.2722	6.5525	6.2635								7.3	1.989	1.73	1.717	1.371	1.1178	1.1172
6.9	5.9296	6.8112	6.2117	7.0104	6.928	6.3136
7.3	7.847	7.7712	8.3587	6.6315	5.7338	7.3669								7.7	1.657	1.297	1.338	1.064	0.856	0.856
7.5	7.4314	6.8899	6.1318	5.9724	6.8034	9.0644								8.3	1.476	1.247	1.197	1	0.825	0.799
7.7	8.8191	6.5994	5.988	7.4374	7.6542	6.4849								8.6	1.302	1.145	1.131	0.967	0.823	0.801
7.9	7.4718	7.1701	7.1314	6.6978	7.6564	7.2788
8.3	6.2132	7.7476	8.117	6.5707	7.5376	9.7308
	ATPase activity @ 150 mM K
pH	ATPase activity (µmol Pi/mg/min)
	1	2	3	4	5	6
5.6	2.1502	2.6486	3.6158	1.9643	2.2083	2.393
5.9	2.8144	2.5425	3.7122	3.3351	2.5954	2.7724
6.2	5.724	5.7101	5.596	6.428	6.1978	7.2901
6.4	7.104	7.5359	6.6069	7.7185	7.727	7.7023
6.6	9.5328	9.6257	8.1543	10.5825	9.1302	9.0304
6.9	10.3342	10.2159	9.8479	11.6171	10.6514	9.7205
7.3	11.7202	13.0224	11.4472	11.1484	10.1281	11.884
7.5	12.2286	11.8635	10.689	11.2396	11.2313	11.7293
7.7	14.5164	11.6689	11.3512	11.6446	11.3833	10.4361
7.9	12.184	11.311	11.5836	11.5077	13.1388	11.8289
8.3	11.0823	11.4344	13.2489	11.6509	11.9345	11.3374

## Sheet: fig6D_T75D
ATPase activity @0.1 mM K															transport @ 100 mM K
pH	ATPase activity (µmol Pi/mg/min)														pH	current (nA)
	1	2	3	4	5	6	7	8							5.9	0.643	0.6	0.595	0.821	0.75	0.771
5.6	2.1546	1.5122	1.6994	1.5049	1.5352	1.4179	1.7579	0.9054							6.4	0.964	0.858	0.843	1.244	1.148	1.146
5.9	2.8063	2.5474	3.6294	2.9506	2.9035	3.2718									6.9	0.945	0.913	0.916	1.258	1.217	1.233
6.2	5.0346	3.8759	4.9107	5.8933	4.2905	4.7835									7.3	0.762	0.83	0.89	0.9	1.084	1.095
6.4	5.1104	5.1906	4.9864	4.8899	5.0229	5.726									7.7	0.686	0.652	0.882	0.847	0.86
6.6	5.0965	4.3999	5.2237	5.2542	6.4138	6.6496									8.3	0.281	0.291	0.272	0.385	0.373	0.376
6.9	6.3053	5.4294	5.3263	6.0534	4.8542	5.8494									8.6	0.2	0.203	0.188	0.274	0.272	0.265
7.3	2.762	2.6982	3.7028	2.7794	2.606	3.1177
7.5	1.9665	2.0544	2.1049	1.9872	2.0486	2.1084
7.7	1.1133	1.4949	1.0971	1.1815	1.0437	0.8177
7.9	0.9374	0.7443	0.9458	0.947	1.4634	0.9802
8.3	0.5807	0.5478	0.5182	0.4343	0.4136	0.403
ATPase activity @150 mM K
pH	ATPase activity (µmol Pi/mg/min)
	1	2	3	4	5	6	7	8
5.6	4.3824	4.3679	4.1239	4.0829	3.8181	4.0845	4.1556	4.1019
5.9	5.192	5.0269	5.3884	5.388	5.1283	5.6642
6.2	9.1035	8.9771	8.9545	10.6227	9.0895	9.2334
6.4	9.2481	9.1469	9.0716	9.6381	9.3067	9.3895
6.6	8.5961	8.435	8.4087	8.2479	10.1345
6.9	10.8171	9.6752	8.896	9.7533	9.9829	9.2997
7.3	5.2345	4.9666	5.2297	5.751	5.2578	5.5962	6.0838
7.5	3.8034	3.499	3.5898	3.7758	3.7919	3.7059
7.7	2.2545	2.0375	2.3272	2.1609	2.2374	1.7219
7.9	1.5295	1.4769	1.347	1.4655	1.6226	1.3575	1.2561
8.3	0.9402	1.1094	0.8048	0.791	0.7447	0.8579

## Sheet: FIg6E_T75K
		ATPase activity @0.1 mM K													transport @ 100 mM K
pH	ATPase activity (µmol Pi/mg/min)														pH	current (nA)
pH 6.9	7.40775	7.95659	7.79421	8.04428	8.93087	8.28135									6.9	0.0132	0.0122	0.0019	-0.0109	0	0.0014
pH 7.3	7.40775	7.50842	7.68704	7.99069	7.46945	8.11897									7.3	-0.003	0.0028	-0.0328	-0.0073	-0.0046	-0.0144
pH 7.7	6.3328	7.46945	6.00804	6.81994	5.84566	7.14469									7.7	0.0033	-0.0094	-0.0014	-0.2807	0.0168	-0.0078
pH 8.3	4.22186	3.73473	3.73473	3.73473	3.73473	3.40997									8.3	0.0231	0.006	0.01	0.0282	0.0378	0.0192
pH 8.8	0.860611	0.811897	1.11555	0.974277	0.925563										8.8	0.0427	0.0413	0.0561	0.0426	0.0531	0.0462
ATPase activity @150 mM K
pH	ATPase activity (µmol Pi/mg/min)
	1	2	3	4	5	6
6.9	6.13344	6.30868	6.38579	5.78296	6.30868	6.48392
7.3	6.57154	5.9582	6.44011	6.34899	6.30868	5.9582
7.7	7.18489	7.00965	6.30868	7.18489	6.81688	6.65756
8.3	5.8881	5.43248	6.48392	6.13344	6.2526	6.23158
8.8	1.80674	2.10289	2.06785	4.55627	2.44461
